# Supplementary material for: Synergistic Effect of Erastin Combined with Nutlin-3 on Vestibular Schwannoma Cells as p53 Modulates Erastin-Induced Ferroptosis Response
Source: PubMed Central journal article supplement (PMC8961447; doi:10.1155/2022/7507857), 2022-03-21

**Figure S1**

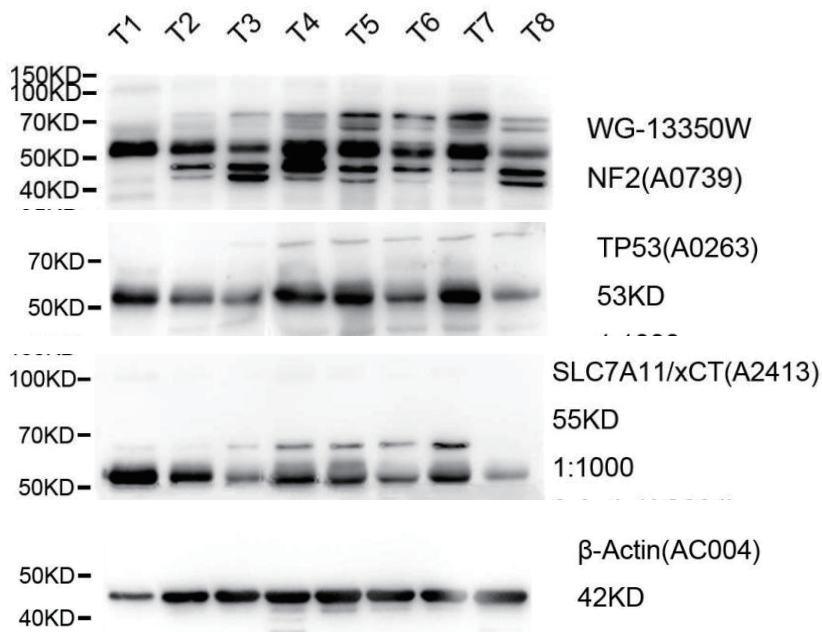

**Figure S2**

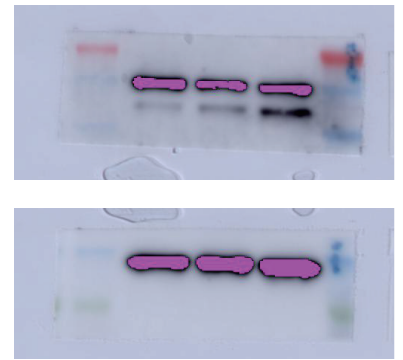

**Figure S3**

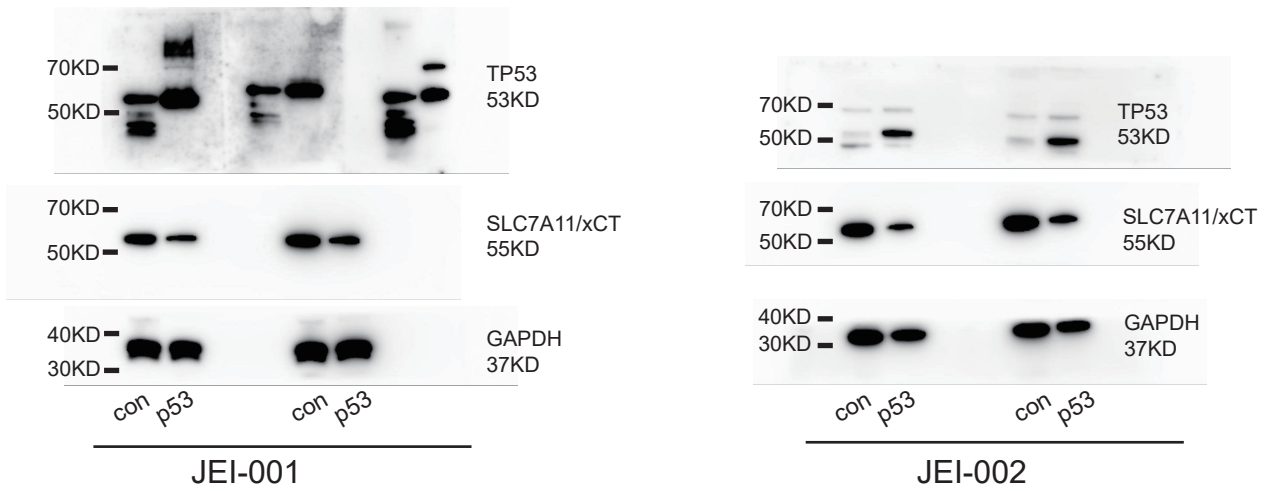

**Figure S4**

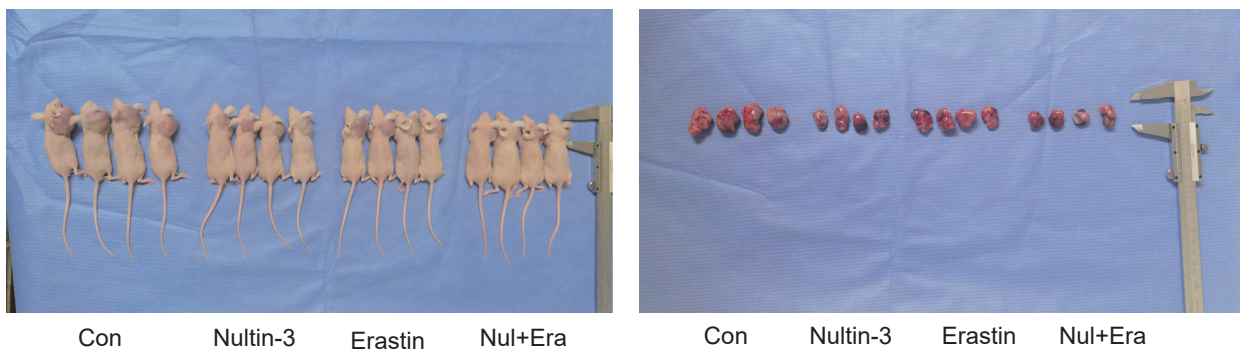

Supplement: 7507857.f1.pdf [file 7507857.f1.pdf]
