# Supplementary material for: Synergistic Effect of Erastin Combined with Nutlin-3 on Vestibular Schwannoma Cells as p53 Modulates Erastin-Induced Ferroptosis Response
Source: PubMed Central journal article supplement (PMC8961447; doi:10.1155/2022/7507857), 2022-03-21
Supplement: 7507857.f2.pdf [file 7507857.f2.pdf]

| gene_id         | T_VS        | Ctrl        | log2FoldChange | pvalue    | padj      | gene_name  |
|-----------------|-------------|-------------|----------------|-----------|-----------|------------|
| ENSG00000106366 | 232.0903255 | 140456.8487 | -9.241025527   | 3.30E-276 | 8.57E-272 | SERPINE1   |
| ENSG00000165092 | 26023.08633 | 26.69177742 | 9.924282371    | 2.21E-198 | 2.87E-194 | ALDH1A1    |
| ENSG00000019582 | 74272.78678 | 11.96639716 | 12.58706607    | 6.57E-164 | 5.69E-160 | CD74       |
| ENSG00000158887 | 64355.59062 | 77.13439585 | 9.704404015    | 1.20E-123 | 7.77E-120 | MPZ        |
| ENSG00000171766 | 13548.00568 | 5.391691008 | 11.29699516    | 3.93E-119 | 2.04E-115 | GATM       |
| ENSG00000101938 | 3679.234125 | 7.134247879 | 9.003621468    | 1.01E-111 | 4.39E-108 | CHRD1      |
| ENSG00000106565 | 4852.638789 | 11.04787628 | 8.77290322     | 1.29E-108 | 4.77E-105 | TMEM176B   |
| ENSG00000091409 | 14400.859   | 396.6089791 | 5.183055506    | 7.42E-103 | 2.41E-99  | ITGA6      |
| ENSG00000145335 | 4533.77252  | 15.28607785 | 8.222349348    | 2.44E-98  | 7.05E-95  | SNCA       |
| ENSG00000197971 | 27790.00794 | 218.4320041 | 6.991323482    | 1.54E-95  | 4.01E-92  | MBP        |
| ENSG00000150630 | 85.49704281 | 2727.230107 | -4.995791116   | 2.30E-95  | 5.43E-92  | VEGFC      |
| ENSG00000109099 | 35872.97618 | 389.0448636 | 6.526112735    | 2.13E-94  | 4.62E-91  | PMP22      |
| ENSG00000012171 | 48787.79257 | 195.5072197 | 7.961856235    | 4.81E-91  | 9.61E-88  | SEMA3B     |
| ENSG00000118971 | 5822.763817 | 477.9939056 | 3.607038252    | 1.72E-90  | 3.19E-87  | CCND2      |
| ENSG00000157368 | 4448.03694  | 4.259554931 | 10.01507423    | 5.39E-89  | 9.34E-86  | IL34       |
| ENSG00000105767 | 15198.43065 | 208.7681723 | 6.18742897     | 1.07E-87  | 1.74E-84  | CADM4      |
| ENSG00000007237 | 13773.80616 | 38.94633396 | 8.460068502    | 4.88E-87  | 7.46E-84  | AC005747.1 |
| ENSG00000130558 | 3569.682069 | 12.95329767 | 8.108392514    | 3.81E-85  | 5.50E-82  | OLFM1      |
| ENSG00000110876 | 1422.249339 | 43.6577647  | 5.029024473    | 4.61E-85  | 6.31E-82  | SELPLG     |
| ENSG00000169679 | 19.42885831 | 1441.701928 | -6.215418237   | 7.26E-82  | 9.44E-79  | BUB1       |
| ENSG00000137642 | 4251.839482 | 6.266477676 | 9.431606908    | 1.10E-80  | 1.36E-77  | SORL1      |
| ENSG00000165795 | 13415.81388 | 18.76045071 | 9.491767203    | 1.30E-78  | 1.54E-75  | NDRG2      |
| ENSG00000174607 | 2234.303166 | 5.982042707 | 8.523688402    | 4.95E-77  | 5.59E-74  | UGT8       |
| ENSG00000123485 | 12.048375   | 1252.42273  | -6.695713567   | 8.28E-77  | 8.97E-74  | HJURP      |
| ENSG00000141526 | 321.1446943 | 18732.55191 | -5.866050698   | 1.21E-76  | 1.26E-73  | SLC16A3    |
| ENSG00000170458 | 4924.094571 | 26.63614645 | 7.536893736    | 9.51E-73  | 9.51E-70  | CD14       |
| ENSG00000138160 | 43.55458478 | 1443.509011 | -5.050378341   | 3.88E-72  | 3.74E-69  | KIF11      |
| ENSG00000180354 | 5970.646715 | 298.4158867 | 4.323148999    | 5.64E-72  | 5.23E-69  | MTURN      |
| ENSG00000153902 | 18701.67573 | 2.476859868 | 12.86783933    | 7.94E-70  | 7.12E-67  | LGI4       |
| ENSG00000185818 | 1431.429345 | 18.15015831 | 6.309607038    | 1.20E-69  | 1.04E-66  | NAT8L      |
| ENSG00000010327 | 3252.035123 | 9.640633454 | 8.394231196    | 9.56E-69  | 8.01E-66  | STAB1      |
| ENSG00000137285 | 2696.559878 | 84.30176545 | 4.998113245    | 1.20E-68  | 9.71E-66  | TUBB2B     |
| ENSG00000005513 | 3275.408571 | 5.410604229 | 9.246249661    | 1.43E-68  | 1.13E-65  | SOX8       |
| ENSG00000105825 | 255.9612035 | 24715.55377 | -6.593422548   | 1.95E-68  | 1.49E-65  | TFPI2      |
| ENSG00000065361 | 8181.601325 | 6.124838129 | 10.38645242    | 1.42E-67  | 1.05E-64  | ERBB3      |
| ENSG00000168071 | 1091.456602 | 14.51048079 | 6.241753077    | 1.96E-67  | 1.42E-64  | CCDC88B    |
| ENSG00000178573 | 3932.815685 | 2.833398881 | 10.42285637    | 2.75E-67  | 1.93E-64  | MAF        |
| ENSG00000130208 | 1739.002059 | 28.39188434 | 5.930590763    | 1.17E-66  | 7.89E-64  | APOC1      |
| ENSG00000180155 | 1676.805059 | 39.8480778  | 5.395334298    | 1.18E-66  | 7.89E-64  | LYNX1      |
| ENSG00000181409 | 16619.43715 | 11.87178388 | 10.4652797     | 2.46E-66  | 1.60E-63  | AATK       |
| ENSG00000070731 | 1966.463477 | 6.074087452 | 8.334434263    | 5.10E-66  | 3.23E-63  | ST6GALNAC2 |
| ENSG00000215018 | 5196.511387 | 8.711500088 | 9.227502403    | 1.28E-65  | 7.90E-63  | COL28A1    |
| ENSG00000102879 | 2985.588018 | 112.3250856 | 4.732221457    | 8.79E-65  | 5.31E-62  | CORO1A     |
| ENSG00000021300 | 8067.206321 | 1.702418679 | 12.14202587    | 3.68E-64  | 2.17E-61  | PLEKHB1    |
| ENSG00000196338 | 1680.43853  | 18.6910436  | 6.479423791    | 5.60E-64  | 3.23E-61  | NLGN3      |
| ENSG00000187260 | 4221.680509 | 7.309009153 | 9.151468719    | 6.39E-64  | 3.61E-61  | WDR86      |
| ENSG00000089041 | 891.375745  | 13.05364315 | 6.102608315    | 8.90E-64  | 4.92E-61  | P2RX7      |
| ENSG00000100644 | 1264.852174 | 26765.7696  | -4.403356636   | 1.44E-63  | 7.78E-61  | HIF1A      |
| ENSG00000184661 | 13.33222965 | 676.7925174 | -5.666556546   | 2.14E-63  | 1.13E-60  | CDCA2      |
| ENSG00000276043 | 58.85507827 | 1835.992571 | -4.96244413    | 2.75E-62  | 1.40E-59  | UHRF1      |

|                 |             |             |              |          |          |            |
|-----------------|-------------|-------------|--------------|----------|----------|------------|
| ENSG00000185274 | 2350.916399 | 7.624254098 | 8.239679326  | 2.75E-62 | 1.40E-59 | GALNT17    |
| ENSG00000235098 | 1000.244627 | 11.77986753 | 6.403010446  | 4.71E-62 | 2.35E-59 | ANKRD65    |
| ENSG00000079819 | 14171.27006 | 1575.473817 | 3.168993027  | 1.21E-61 | 5.95E-59 | EPB41L2    |
| ENSG00000106780 | 5097.385642 | 234.2180584 | 4.443167263  | 1.27E-61 | 6.13E-59 | MEGF9      |
| ENSG00000171992 | 5373.211401 | 225.4842246 | 4.573602519  | 2.34E-61 | 1.10E-58 | SYNPO      |
| ENSG00000162654 | 1129.309432 | 10.14125216 | 6.776330232  | 3.24E-61 | 1.50E-58 | GBP4       |
| ENSG00000161888 | 21.11014955 | 687.0561919 | -5.021723161 | 6.43E-61 | 2.93E-58 | SPC24      |
| ENSG00000100307 | 1678.88165  | 90.45471662 | 4.215587161  | 1.06E-60 | 4.73E-58 | CBX7       |
| ENSG00000123975 | 77.69111537 | 1645.344261 | -4.404204767 | 4.22E-60 | 1.86E-57 | CKS2       |
| ENSG00000086730 | 1204.62443  | 27.15799012 | 5.47614534   | 4.36E-60 | 1.89E-57 | LAT2       |
| ENSG00000100146 | 10798.70008 | 3.300895859 | 11.69454765  | 7.12E-60 | 3.03E-57 | SOX10      |
| ENSG00000143248 | 2179.105406 | 39.47403823 | 5.779853399  | 1.23E-59 | 5.16E-57 | RGS5       |
| ENSG00000018625 | 9343.698174 | 2.180528143 | 12.07890759  | 1.31E-59 | 5.39E-57 | ATP1A2     |
| ENSG00000198915 | 997.9921688 | 26.13925216 | 5.253246974  | 1.60E-59 | 6.48E-57 | RASGEF1A   |
| ENSG00000168209 | 538.7169342 | 6171.472038 | -3.517839017 | 1.99E-59 | 7.96E-57 | DDIT4      |
| ENSG00000125848 | 2057.398324 | 23.86783515 | 6.426015737  | 2.85E-59 | 1.12E-56 | FLRT3      |
| ENSG00000077157 | 2230.03683  | 221.9489553 | 3.328964777  | 6.97E-59 | 2.70E-56 | PPP1R12B   |
| ENSG00000164109 | 52.85422581 | 1456.729595 | -4.783891489 | 1.19E-58 | 4.55E-56 | MAD2L1     |
| ENSG00000134333 | 3183.081898 | 36297.19864 | -3.511375359 | 1.21E-58 | 4.55E-56 | LDHA       |
| ENSG00000099282 | 2891.754644 | 43.60585815 | 6.052601207  | 2.05E-58 | 7.62E-56 | TSPAN15    |
| ENSG00000179403 | 12319.04335 | 187.9820612 | 6.034754434  | 3.32E-58 | 1.21E-55 | VWA1       |
| ENSG00000170075 | 1864.37526  | 4.299693123 | 8.75811749   | 4.29E-58 | 1.55E-55 | GPR37L1    |
| ENSG00000068489 | 58.62981954 | 1068.413768 | -4.18723363  | 5.64E-58 | 1.99E-55 | PRR11      |
| ENSG00000180448 | 1827.652236 | 63.06291381 | 4.858478204  | 5.68E-58 | 1.99E-55 | AC004151.1 |
| ENSG00000176619 | 1082.311774 | 7942.656582 | -2.875536384 | 1.54E-57 | 5.35E-55 | LMNB2      |
| ENSG00000134057 | 56.36301552 | 3379.853528 | -5.905186195 | 1.92E-57 | 6.57E-55 | CCNB1      |
| ENSG00000134121 | 10700.13205 | 6.358522421 | 10.74157054  | 3.11E-57 | 1.05E-54 | CHL1       |
| ENSG00000139549 | 2480.906075 | 2.649180997 | 9.937143008  | 3.62E-57 | 1.20E-54 | DHH        |
| ENSG00000089820 | 1931.483561 | 15.15633506 | 6.983274408  | 1.99E-56 | 6.54E-54 | ARHGAP4    |
| ENSG00000139734 | 24.52101176 | 1006.21859  | -5.359035621 | 2.48E-56 | 8.05E-54 | DIAPH3     |
| ENSG00000053702 | 2400.013173 | 60.70865188 | 5.308744254  | 1.20E-55 | 3.85E-53 | NRIP2      |
| ENSG00000161638 | 558.2114648 | 35854.45201 | -6.005257816 | 2.03E-55 | 6.44E-53 | ITGA5      |
| ENSG00000176533 | 842.1853338 | 8.75395003  | 6.603527295  | 4.86E-55 | 1.52E-52 | GNG7       |
| ENSG00000160255 | 3556.942564 | 35.76901634 | 6.640875278  | 1.01E-54 | 3.13E-52 | ITGB2      |
| ENSG00000128268 | 1896.804894 | 79.61583203 | 4.576662503  | 1.41E-54 | 4.32E-52 | MGAT3      |
| ENSG00000109458 | 2310.383266 | 178.7942495 | 3.691037819  | 1.45E-54 | 4.37E-52 | GAB1       |
| ENSG00000170271 | 1706.138302 | 104.612126  | 4.029127552  | 2.48E-54 | 7.39E-52 | FAXDC2     |
| ENSG00000101057 | 11.19010703 | 1092.599559 | -6.608836882 | 2.62E-54 | 7.73E-52 | MYBL2      |
| ENSG00000187955 | 16314.7266  | 12.86138132 | 10.29783761  | 3.42E-54 | 9.98E-52 | COL14A1    |
| ENSG00000131747 | 78.64842229 | 6080.0661   | -6.271441654 | 1.05E-52 | 3.02E-50 | TOP2A      |
| ENSG00000137807 | 66.05439437 | 1502.374003 | -4.507891115 | 1.15E-52 | 3.29E-50 | AC027237.1 |
| ENSG00000186417 | 4132.749682 | 5.208757394 | 9.606883327  | 1.53E-52 | 4.32E-50 | GLDN       |
| ENSG00000260807 | 1652.227708 | 6.135450615 | 8.078227231  | 8.25E-52 | 2.31E-49 | AC009041.2 |
| ENSG00000105559 | 17048.29383 | 528.9979236 | 5.00981992   | 9.10E-52 | 2.52E-49 | PLEKHA4    |
| ENSG00000150471 | 1433.985974 | 4.963176346 | 8.162504     | 1.02E-51 | 2.80E-49 | ADGRL3     |
| ENSG00000133401 | 6050.748667 | 80.76778042 | 6.229904872  | 2.88E-51 | 7.78E-49 | PDZD2      |
| ENSG00000158008 | 1812.054468 | 31.36910613 | 5.854066866  | 6.72E-51 | 1.80E-48 | EXTL1      |
| ENSG00000064300 | 3127.796297 | 4.013973884 | 9.620340886  | 1.08E-50 | 2.86E-48 | NGFR       |
| ENSG00000162944 | 962.0923887 | 29.53347703 | 5.021066854  | 1.39E-50 | 3.65E-48 | RFTN2      |
| ENSG00000166682 | 1573.405752 | 6.490833752 | 7.925039537  | 2.19E-50 | 5.70E-48 | TMPRSS5    |
| ENSG00000138778 | 34.33435124 | 972.5985088 | -4.825886546 | 2.36E-50 | 6.08E-48 | CENPE      |

|                  |             |             |              |          |          |           |
|------------------|-------------|-------------|--------------|----------|----------|-----------|
| ENSG00000160307  | 49226.27692 | 0           | 17.92087751  | 4.96E-50 | 1.26E-47 | S100B     |
| ENSG00000151892  | 3674.717287 | 1.702418679 | 11.00982326  | 6.01E-50 | 1.52E-47 | GFRA1     |
| ENSG00000171791  | 1928.618386 | 16.37589238 | 6.875532216  | 8.33E-50 | 2.08E-47 | BCL2      |
| ENSG00000117399  | 29.04563079 | 2504.180769 | -6.4298037   | 1.89E-49 | 4.68E-47 | CDC20     |
| ENSG00000109805  | 23.12508347 | 1171.673512 | -5.659469641 | 2.01E-49 | 4.92E-47 | NCAPG     |
| ENSG00000147588  | 50215.51433 | 0           | 17.94958079  | 2.33E-49 | 5.65E-47 | PMP2      |
| ENSG00000130294  | 4154.078023 | 1.518200796 | 11.49235791  | 2.63E-49 | 6.33E-47 | KIF1A     |
| ENSG00000073111  | 52.05376822 | 962.8561644 | -4.209385852 | 7.98E-49 | 1.90E-46 | MCM2      |
| ENSG00000111679  | 932.8324823 | 5.289033778 | 7.444303021  | 1.74E-48 | 4.11E-46 | PTPN6     |
| ENSG00000114166  | 2561.707296 | 162.459604  | 3.979198499  | 4.12E-48 | 9.64E-46 | KAT2B     |
| ENSG00000002933  | 3899.020262 | 9.979543515 | 8.588553991  | 9.15E-48 | 2.12E-45 | TMEM176A  |
| ENSG00000137841  | 2183.206374 | 28.55950076 | 6.250138682  | 2.41E-47 | 5.55E-45 | PLCB2     |
| ENSG00000072571  | 12.96341352 | 920.4908317 | -6.147469473 | 3.04E-47 | 6.93E-45 | HMMR      |
| ENSG00000058085  | 22.1158784  | 459.7594897 | -4.377803044 | 3.12E-47 | 7.05E-45 | LAMC2     |
| ENSG000000092421 | 747.1773534 | 16.67093983 | 5.492703392  | 3.81E-47 | 8.53E-45 | SEMA6A    |
| ENSG00000160781  | 2275.553102 | 36.22004024 | 5.976312074  | 4.01E-47 | 8.91E-45 | PAQR6     |
| ENSG00000135929  | 2107.012095 | 239.5524961 | 3.136970536  | 5.66E-47 | 1.25E-44 | CYP27A1   |
| ENSG00000137491  | 2410.739806 | 2.231278821 | 10.11931316  | 6.48E-47 | 1.42E-44 | SLCO2B1   |
| ENSG00000128050  | 585.9756064 | 5481.556913 | -3.22583213  | 6.74E-47 | 1.46E-44 | PAICS     |
| ENSG00000142945  | 30.47282937 | 1389.415345 | -5.509726325 | 8.17E-47 | 1.75E-44 | KIF2C     |
| ENSG00000102109  | 888.270913  | 12.18946897 | 6.186692691  | 8.27E-47 | 1.76E-44 | PCSK1N    |
| ENSG000000204682 | 3638.511147 | 137.5830014 | 4.726947327  | 1.28E-46 | 2.71E-44 | MIR1915HG |
| ENSG00000010610  | 1597.056475 | 8.438833479 | 7.549768459  | 1.38E-46 | 2.89E-44 | CD4       |
| ENSG00000166432  | 1936.201908 | 5.676254372 | 8.404762878  | 4.75E-46 | 9.87E-44 | ZMAT1     |
| ENSG00000071539  | 19.20331485 | 1182.507752 | -5.94040963  | 4.83E-46 | 9.97E-44 | TRIP13    |
| ENSG00000178695  | 10222.68496 | 607.8649399 | 4.071410072  | 5.20E-46 | 1.06E-43 | KCTD12    |
| ENSG00000153993  | 474.722875  | 11.69959115 | 5.331355046  | 6.10E-46 | 1.24E-43 | SEMA3D    |
| ENSG00000142347  | 1315.525939 | 62.0713898  | 4.405381358  | 6.40E-46 | 1.29E-43 | MYO1F     |
| ENSG00000175063  | 21.37323155 | 1593.500517 | -6.218152998 | 7.03E-46 | 1.40E-43 | UBE2C     |
| ENSG00000154678  | 990.7279934 | 6.888666832 | 7.177003256  | 8.56E-46 | 1.70E-43 | PDE1C     |
| ENSG00000126562  | 20.40177849 | 580.2272867 | -4.83319801  | 9.05E-46 | 1.78E-43 | WNK4      |
| ENSG00000079931  | 4453.85741  | 89.640698   | 5.631740676  | 1.52E-45 | 2.96E-43 | MOXD1     |
| ENSG00000135378  | 621.7240065 | 8.835510684 | 6.122717659  | 1.77E-45 | 3.43E-43 | PRRG4     |
| ENSG00000021645  | 1867.536208 | 3.210006989 | 9.177853068  | 1.90E-45 | 3.65E-43 | NRXN3     |
| ENSG00000112742  | 14.59086878 | 616.6902236 | -5.404328154 | 2.00E-45 | 3.83E-43 | TTK       |
| ENSG00000024526  | 7.474649858 | 980.4536347 | -7.026347066 | 2.08E-45 | 3.94E-43 | DEPDC1    |
| ENSG00000143110  | 735.9232644 | 17.0594447  | 5.424213999  | 2.61E-45 | 4.91E-43 | C1orf162  |
| ENSG00000149503  | 142.2730373 | 1009.918882 | -2.827473186 | 3.13E-45 | 5.85E-43 | INCENP    |
| ENSG00000105894  | 1819.812806 | 76.46710699 | 4.574182535  | 4.31E-45 | 7.99E-43 | PTN       |
| ENSG00000102934  | 2669.269396 | 34.0690378  | 6.294800461  | 4.57E-45 | 8.41E-43 | PLLP      |
| ENSG00000115290  | 1106.328151 | 21.56573655 | 5.67331957   | 7.17E-45 | 1.31E-42 | GRB14     |
| ENSG00000143226  | 1407.968033 | 3.475657132 | 8.628782508  | 8.07E-45 | 1.47E-42 | FCGR2A    |
| ENSG00000154856  | 1524.105337 | 5.952517001 | 7.980568175  | 1.15E-44 | 2.08E-42 | APCDD1    |
| ENSG00000090889  | 19.64527023 | 916.0373923 | -5.542541679 | 1.95E-44 | 3.50E-42 | KIF4A     |
| ENSG00000235162  | 163.6420371 | 2446.875312 | -3.902956437 | 2.03E-44 | 3.61E-42 | C12orf75  |
| ENSG00000156970  | 20.14607618 | 954.2386696 | -5.562660921 | 2.12E-44 | 3.74E-42 | BUB1B     |
| ENSG00000135451  | 9.610504235 | 817.0986617 | -6.404437485 | 2.15E-44 | 3.77E-42 | TROAP     |
| ENSG00000155849  | 1631.057862 | 5.463795051 | 8.181101191  | 2.40E-44 | 4.19E-42 | ELMO1     |
| ENSG00000162512  | 10506.22661 | 711.9604536 | 3.882828457  | 2.52E-44 | 4.36E-42 | SDC3      |
| ENSG00000203760  | 21.52688941 | 506.4665931 | -4.557393643 | 3.06E-44 | 5.27E-42 | CENPW     |
| ENSG00000163535  | 46.32728061 | 660.1769514 | -3.833375825 | 3.99E-44 | 6.82E-42 | SGO2      |

|                 |             |             |              |          |          |            |
|-----------------|-------------|-------------|--------------|----------|----------|------------|
| ENSG00000130592 | 2106.142208 | 6.931245169 | 8.223517461  | 4.87E-44 | 8.27E-42 | LSP1       |
| ENSG00000089685 | 22.78649746 | 1962.890472 | -6.425540003 | 5.44E-44 | 9.18E-42 | BIRC5      |
| ENSG00000182253 | 1543.606858 | 121.1780969 | 3.672275538  | 6.49E-44 | 1.09E-41 | SYNM       |
| ENSG00000158869 | 1335.865205 | 9.438786619 | 7.127617301  | 1.02E-43 | 1.70E-41 | FCER1G     |
| ENSG00000102547 | 3790.06061  | 176.4111853 | 4.426316834  | 1.06E-43 | 1.75E-41 | CAB39L     |
| ENSG00000113083 | 309.1008482 | 10442.94567 | -5.078593313 | 1.31E-43 | 2.15E-41 | LOX        |
| ENSG00000174348 | 1277.627811 | 6.593619377 | 7.571201438  | 1.33E-43 | 2.18E-41 | PODN       |
| ENSG00000105011 | 38.67117881 | 649.015339  | -4.068277164 | 1.47E-43 | 2.38E-41 | ASF1B      |
| ENSG00000171812 | 1985.821511 | 72.6367087  | 4.768765183  | 1.76E-43 | 2.84E-41 | COL8A2     |
| ENSG00000076382 | 82.9883979  | 1386.553577 | -4.061863214 | 2.31E-43 | 3.70E-41 | SPAG5      |
| ENSG00000169607 | 13.48058818 | 913.5854565 | -6.076697636 | 4.72E-43 | 7.52E-41 | CKAP2L     |
| ENSG00000095713 | 959.3876305 | 2.751966622 | 8.39466529   | 6.30E-43 | 9.98E-41 | CRTAC1     |
| ENSG00000149633 | 5125.346751 | 114.88911   | 5.480076783  | 6.54E-43 | 1.03E-40 | KIAA1755   |
| ENSG00000139597 | 485.1920466 | 8.775303396 | 5.768143957  | 7.64E-43 | 1.20E-40 | N4BP2L1    |
| ENSG00000127589 | 505.0482156 | 4010.324104 | -2.989167073 | 1.44E-42 | 2.24E-40 | TUBBP1     |
| ENSG00000146938 | 1971.976285 | 2.842855491 | 9.427524327  | 1.58E-42 | 2.45E-40 | NLGN4X     |
| ENSG00000121621 | 11.16614516 | 456.6625422 | -5.351878978 | 1.77E-42 | 2.72E-40 | KIF18A     |
| ENSG00000135077 | 732.9971249 | 3.822739535 | 7.547377998  | 2.09E-42 | 3.20E-40 | HAVCR2     |
| ENSG00000196218 | 1115.293878 | 3.148643826 | 8.440107988  | 2.53E-42 | 3.85E-40 | RYR1       |
| ENSG00000121039 | 4408.881693 | 107.7648794 | 5.352917559  | 2.56E-42 | 3.86E-40 | RDH10      |
| ENSG00000145416 | 1133.796869 | 61.70680684 | 4.1955765    | 2.77E-42 | 4.16E-40 | 1-Mar      |
| ENSG00000137309 | 792.5087202 | 19621.62803 | -4.629826955 | 3.86E-42 | 5.77E-40 | HMGA1      |
| ENSG00000156475 | 1805.7548   | 1.702418679 | 9.984239139  | 4.94E-42 | 7.33E-40 | PPP2R2B    |
| ENSG00000161921 | 1474.318047 | 15.40076023 | 6.568457764  | 6.50E-42 | 9.60E-40 | CXCL16     |
| ENSG00000175445 | 6133.246658 | 1.702418679 | 11.7597983   | 6.69E-42 | 9.81E-40 | LPL        |
| ENSG00000143126 | 974.8856477 | 118.9364624 | 3.034442028  | 7.31E-42 | 1.07E-39 | CELSR2     |
| ENSG00000117650 | 5.718965719 | 576.7469845 | -6.651167123 | 7.59E-42 | 1.10E-39 | NEK2       |
| ENSG00000151150 | 4078.073006 | 59.92971558 | 6.089463567  | 8.83E-42 | 1.27E-39 | ANK3       |
| ENSG00000101447 | 3.928036872 | 723.2676528 | -7.522997664 | 1.08E-41 | 1.55E-39 | FAM83D     |
| ENSG00000165480 | 8.397210272 | 509.3220685 | -5.915164199 | 1.47E-41 | 2.10E-39 | SKA3       |
| ENSG00000171860 | 1120.339684 | 2.079026788 | 9.02913498   | 1.77E-41 | 2.51E-39 | C3AR1      |
| novel.86        | 3.32769377  | 511.940427  | -7.264070359 | 2.38E-41 | 3.36E-39 | -          |
| ENSG00000206052 | 893.1434125 | 6.796622087 | 7.034964292  | 2.52E-41 | 3.53E-39 | DOK6       |
| ENSG00000169213 | 5.834871573 | 1938.827409 | -8.385112357 | 2.77E-41 | 3.87E-39 | RAB3B      |
| ENSG00000176887 | 3.038213869 | 627.5222076 | -7.694172545 | 2.90E-41 | 4.04E-39 | SOX11      |
| ENSG00000114948 | 10458.58623 | 439.0705476 | 4.574529972  | 3.37E-41 | 4.66E-39 | ADAM23     |
| ENSG00000261371 | 1406.130148 | 33.89453332 | 5.372315396  | 3.52E-41 | 4.84E-39 | PECAM1     |
| ENSG00000198554 | 61.46680781 | 587.3840907 | -3.256742747 | 8.46E-41 | 1.16E-38 | WDHD1      |
| ENSG00000184060 | 477.1340627 | 10.57806756 | 5.479794979  | 9.01E-41 | 1.23E-38 | ADAP2      |
| ENSG00000136999 | 2987.911019 | 69.98799442 | 5.418640209  | 9.98E-41 | 1.35E-38 | CCN3       |
| ENSG00000145703 | 540.1630641 | 7.338534859 | 6.176955088  | 1.06E-40 | 1.42E-38 | IQGAP2     |
| ENSG00000182578 | 5049.700368 | 56.40061084 | 6.488434939  | 1.48E-40 | 1.98E-38 | CSF1R      |
| ENSG00000196376 | 2316.254304 | 1.742556871 | 10.34126599  | 1.68E-40 | 2.24E-38 | SLC35F1    |
| ENSG00000171208 | 73.71551076 | 906.6000527 | -3.621290491 | 1.70E-40 | 2.26E-38 | NETO2      |
| ENSG00000255197 | 518.3287443 | 8.876804751 | 5.858174114  | 1.76E-40 | 2.33E-38 | AC090559.1 |
| ENSG00000129675 | 3061.477847 | 234.904004  | 3.705263816  | 1.93E-40 | 2.53E-38 | ARHGEF6    |
| ENSG00000162511 | 4386.464497 | 32.51411926 | 7.0820515    | 4.24E-40 | 5.54E-38 | LAPTM5     |
| ENSG00000128604 | 712.5722388 | 2.954969332 | 7.948411626  | 5.66E-40 | 7.35E-38 | IRF5       |
| ENSG00000133246 | 427.4723928 | 3.984448178 | 6.756509849  | 6.78E-40 | 8.76E-38 | PRAM1      |
| ENSG00000067840 | 3098.217138 | 23.39648536 | 7.059010423  | 1.27E-39 | 1.64E-37 | PDZD4      |
| ENSG00000132561 | 9602.780888 | 58.04492405 | 7.366390911  | 1.28E-39 | 1.64E-37 | MATN2      |

|                 |             |             |              |          |          |          |
|-----------------|-------------|-------------|--------------|----------|----------|----------|
| ENSG00000093009 | 11.38381073 | 960.7137329 | -6.393404328 | 1.43E-39 | 1.82E-37 | CDC45    |
| ENSG00000011201 | 591.8726477 | 16.47970548 | 5.165390795  | 1.79E-39 | 2.27E-37 | ANOS1    |
| ENSG00000143228 | 28.40753568 | 788.8997623 | -4.795010044 | 2.38E-39 | 3.01E-37 | NUF2     |
| ENSG00000166428 | 1775.962366 | 5.53217468  | 8.345957171  | 2.79E-39 | 3.50E-37 | PLD4     |
| ENSG00000184574 | 462.7384364 | 3.627909165 | 7.008098869  | 3.19E-39 | 3.98E-37 | LPAR5    |
| ENSG00000166073 | 456.3282669 | 2728.528107 | -2.579745581 | 3.43E-39 | 4.26E-37 | GPR176   |
| ENSG00000219438 | 5044.334657 | 1.10029862  | 12.190148    | 4.08E-39 | 5.04E-37 | TAF5     |
| ENSG00000069188 | 574.2421997 | 8.752794155 | 6.049056978  | 4.68E-39 | 5.76E-37 | SDK2     |
| ENSG00000132182 | 429.6468534 | 5.819049794 | 6.220274745  | 4.75E-39 | 5.83E-37 | NUP210   |
| ENSG00000087586 | 41.76770161 | 1553.018738 | -5.218386151 | 5.38E-39 | 6.56E-37 | AURKA    |
| ENSG00000164647 | 4.277976998 | 1020.215269 | -7.905175056 | 5.84E-39 | 7.09E-37 | STEAP1   |
| ENSG00000164045 | 11.16865246 | 402.1208404 | -5.168404918 | 6.12E-39 | 7.40E-37 | CDC25A   |
| ENSG00000165868 | 6334.832548 | 266.4353795 | 4.571594136  | 1.06E-38 | 1.27E-36 | HSPA12A  |
| ENSG00000179583 | 2021.20795  | 53.69263522 | 5.236811393  | 2.08E-38 | 2.49E-36 | CIITA    |
| ENSG00000197892 | 1490.345779 | 199.1284848 | 2.903808334  | 2.28E-38 | 2.72E-36 | KIF13B   |
| ENSG00000188487 | 1317.935884 | 3.566546002 | 8.523452668  | 2.31E-38 | 2.74E-36 | INSC     |
| ENSG00000140678 | 1424.677539 | 15.16206725 | 6.568014493  | 2.36E-38 | 2.79E-36 | ITGAX    |
| ENSG00000163219 | 501.2340317 | 4.566499142 | 6.755246461  | 3.17E-38 | 3.72E-36 | ARHGAP25 |
| ENSG00000172020 | 1344.474295 | 4.280779903 | 8.290093008  | 3.87E-38 | 4.53E-36 | GAP43    |
| ENSG00000148053 | 5377.066161 | 1.029478846 | 12.29423592  | 4.07E-38 | 4.74E-36 | NTRK2    |
| ENSG00000146122 | 2656.217031 | 344.9390159 | 2.944338033  | 4.86E-38 | 5.63E-36 | DAAM2    |
| ENSG00000169258 | 11.20013622 | 283.2107744 | -4.66054853  | 5.77E-38 | 6.66E-36 | GPRIN1   |
| ENSG00000133477 | 1311.974646 | 1.844058227 | 9.508482216  | 6.54E-38 | 7.52E-36 | FAM83F   |
| ENSG00000076344 | 2271.884352 | 23.00122082 | 6.626550934  | 6.58E-38 | 7.53E-36 | RGS11    |
| ENSG00000113578 | 5391.059667 | 57.55234929 | 6.547254765  | 7.58E-38 | 8.63E-36 | FGF1     |
| ENSG00000107902 | 1637.177723 | 180.0948539 | 3.185025258  | 8.83E-38 | 1.00E-35 | LHPP     |
| ENSG00000159217 | 2.158491326 | 1251.130084 | -9.19820343  | 1.14E-37 | 1.29E-35 | IGF2BP1  |
| ENSG00000163431 | 532.0991137 | 23.04264328 | 4.521926006  | 1.33E-37 | 1.50E-35 | LMOD1    |
| ENSG00000197943 | 457.8242301 | 15.05354943 | 4.925882035  | 1.48E-37 | 1.66E-35 | PLCG2    |
| ENSG00000174125 | 478.0997892 | 3.781445468 | 6.932766335  | 1.54E-37 | 1.72E-35 | TLR1     |
| ENSG00000129244 | 938.3443825 | 1.762625967 | 9.03249133   | 2.20E-37 | 2.44E-35 | ATP1B2   |
| ENSG00000088325 | 67.76960574 | 3382.619035 | -5.640734765 | 2.79E-37 | 3.09E-35 | TPX2     |
| ENSG00000064225 | 1782.842398 | 80.7184424  | 4.46691082   | 3.00E-37 | 3.30E-35 | ST3GAL6  |
| ENSG00000099889 | 3527.338892 | 83.09996548 | 5.406753973  | 3.68E-37 | 4.04E-35 | ARVCF    |
| ENSG00000162645 | 3336.472802 | 72.73636502 | 5.52225319   | 3.78E-37 | 4.12E-35 | GBP2     |
| ENSG00000069535 | 525.3623096 | 3.108505634 | 7.355094447  | 4.12E-37 | 4.48E-35 | MAOB     |
| ENSG00000186469 | 8739.546095 | 300.7035325 | 4.86026136   | 4.88E-37 | 5.28E-35 | GNG2     |
| ENSG00000148655 | 439.6550508 | 7.114178783 | 5.941337298  | 5.22E-37 | 5.63E-35 | LRMDA    |
| ENSG00000144810 | 1070.875279 | 14455.16496 | -3.754819409 | 5.28E-37 | 5.67E-35 | COL8A1   |
| ENSG00000124406 | 816.9720957 | 12.1481749  | 6.068911923  | 5.58E-37 | 5.96E-35 | ATP8A1   |
| ENSG00000125430 | 29.94415806 | 2881.324935 | -6.588054393 | 6.09E-37 | 6.49E-35 | HS3ST3B1 |
| ENSG00000126787 | 6.870545809 | 1314.432174 | -7.572030823 | 6.27E-37 | 6.65E-35 | DLGAP5   |
| ENSG00000141480 | 1969.496935 | 150.2180188 | 3.712903335  | 7.06E-37 | 7.45E-35 | ARRB2    |
| ENSG00000081237 | 1605.314915 | 1.783850939 | 9.806924371  | 8.30E-37 | 8.73E-35 | PTPRC    |
| ENSG00000196611 | 3.948166524 | 1930.836835 | -8.935985055 | 8.98E-37 | 9.41E-35 | MMP1     |
| ENSG00000102996 | 6175.286369 | 516.9813112 | 3.578876889  | 1.03E-36 | 1.07E-34 | MMP15    |
| ENSG00000170779 | 120.3686984 | 1130.150183 | -3.231132362 | 1.43E-36 | 1.49E-34 | CDCA4    |
| ENSG00000049246 | 1478.34683  | 34.39515202 | 5.421930217  | 1.79E-36 | 1.85E-34 | PER3     |
| ENSG00000077152 | 31.64224528 | 713.7517537 | -4.497698751 | 1.88E-36 | 1.94E-34 | UBE2T    |
| ENSG00000071991 | 10454.59395 | 0           | 15.6855921   | 2.08E-36 | 2.14E-34 | CDH19    |
| ENSG00000133056 | 404.1241741 | 8.112976048 | 5.622790529  | 2.13E-36 | 2.18E-34 | PIK3C2B  |

|                 |             |             |              |          |          |            |
|-----------------|-------------|-------------|--------------|----------|----------|------------|
| ENSG00000169508 | 457.1528278 | 5.492036488 | 6.399167808  | 2.61E-36 | 2.66E-34 | GPR183     |
| ENSG00000225217 | 1652.559041 | 6.582878497 | 7.983864301  | 2.80E-36 | 2.84E-34 | HSPA7      |
| ENSG00000074800 | 8132.948608 | 56209.79752 | -2.788982076 | 3.64E-36 | 3.68E-34 | ENO1       |
| ENSG00000188906 | 995.2559865 | 37.75155045 | 4.714431371  | 3.90E-36 | 3.92E-34 | LRRK2      |
| ENSG00000123243 | 2722.419181 | 3.444975551 | 9.594107205  | 3.91E-36 | 3.92E-34 | ITIH5      |
| ENSG00000187479 | 613.912779  | 29.03285833 | 4.401423571  | 4.58E-36 | 4.57E-34 | C11orf96   |
| novel.828       | 360.1023044 | 28.72822587 | 3.648392744  | 5.95E-36 | 5.92E-34 | -          |
| ENSG00000187699 | 3115.627247 | 21.54695172 | 7.166915988  | 6.83E-36 | 6.77E-34 | C2orf88    |
| ENSG00000165804 | 2120.735121 | 247.1076815 | 3.102486541  | 7.03E-36 | 6.94E-34 | ZNF219     |
| ENSG00000153044 | 54.84415768 | 577.25462   | -3.396478471 | 8.26E-36 | 8.13E-34 | CENPH      |
| ENSG00000108106 | 624.9699002 | 4928.528207 | -2.979410941 | 8.50E-36 | 8.34E-34 | UBE2S      |
| ENSG00000146670 | 34.1343793  | 1138.234849 | -5.061458875 | 1.05E-35 | 1.03E-33 | CDCA5      |
| ENSG00000123338 | 1265.858172 | 1.467450118 | 9.781642334  | 1.10E-35 | 1.07E-33 | NCKAP1L    |
| ENSG00000132507 | 2824.392379 | 15141.3466  | -2.422459143 | 1.53E-35 | 1.48E-33 | EIF5A      |
| ENSG00000128872 | 11123.10925 | 335.4736919 | 5.051706274  | 1.53E-35 | 1.48E-33 | TMOD2      |
| ENSG00000134690 | 28.73351394 | 957.9914801 | -5.059154525 | 1.69E-35 | 1.62E-33 | CDCA8      |
| ENSG00000170915 | 1860.532011 | 160.4485716 | 3.537320063  | 2.33E-35 | 2.23E-33 | PAQR8      |
| ENSG00000139044 | 1345.459628 | 1.426156051 | 9.87277146   | 2.53E-35 | 2.41E-33 | B4GALNT3   |
| ENSG00000153208 | 363.1529119 | 5.411760104 | 6.074156958  | 2.53E-35 | 2.41E-33 | MERTK      |
| ENSG00000172005 | 7227.18198  | 0           | 15.15296541  | 2.62E-35 | 2.48E-33 | MAL        |
| ENSG00000140534 | 21.6878557  | 382.114937  | -4.136168025 | 3.50E-35 | 3.31E-33 | TICRR      |
| ENSG00000111640 | 9238.239738 | 63818.13877 | -2.788273912 | 3.90E-35 | 3.67E-33 | GAPDH      |
| ENSG00000148219 | 1357.637741 | 101.6634496 | 3.73715926   | 4.41E-35 | 4.14E-33 | ASTN2      |
| ENSG00000106772 | 757.1986256 | 46.03325161 | 4.037604193  | 5.81E-35 | 5.43E-33 | PRUNE2     |
| ENSG00000148773 | 55.9414036  | 3805.863089 | -6.087341704 | 5.93E-35 | 5.52E-33 | MKI67      |
| ENSG00000100055 | 1434.26942  | 14.8869605  | 6.60585418   | 6.27E-35 | 5.81E-33 | CYTH4      |
| ENSG00000214357 | 965.9988572 | 79.90758744 | 3.595210563  | 8.61E-35 | 7.96E-33 | NEURL1B    |
| ENSG00000162946 | 758.4183463 | 63.31551133 | 3.585283039  | 9.02E-35 | 8.31E-33 | DISC1      |
| ENSG00000126882 | 472.2006092 | 11.79048002 | 5.320116311  | 1.01E-34 | 9.25E-33 | FAM78A     |
| ENSG00000090661 | 1308.422645 | 200.1812435 | 2.709190497  | 1.12E-34 | 1.02E-32 | CERS4      |
| ENSG00000183018 | 443.7489267 | 7.65493568  | 5.830420438  | 1.38E-34 | 1.26E-32 | AC118754.1 |
| ENSG00000145242 | 346.0350211 | 11.15999012 | 4.957481059  | 1.43E-34 | 1.30E-32 | EPHA5      |
| ENSG00000100167 | 550.5473874 | 5.594693718 | 6.656261007  | 1.57E-34 | 1.42E-32 | SEPT3      |
| ENSG00000072274 | 415.8127505 | 4085.45097  | -3.296392704 | 1.58E-34 | 1.42E-32 | TFRC       |
| ENSG00000015285 | 514.20045   | 9.008987688 | 5.837997267  | 1.74E-34 | 1.56E-32 | WAS        |
| ENSG00000239697 | 1409.769553 | 177.597073  | 2.98802291   | 2.25E-34 | 2.01E-32 | TNFSF12    |
| ENSG00000266714 | 3489.127205 | 55.40019098 | 5.974166673  | 2.37E-34 | 2.12E-32 | MYO15B     |
| ENSG00000100505 | 424.3699585 | 10.28404758 | 5.357551493  | 2.40E-34 | 2.13E-32 | TRIM9      |
| ENSG00000163739 | 21.99767872 | 12699.58024 | -9.174453438 | 2.88E-34 | 2.56E-32 | CXCL1      |
| ENSG00000104812 | 471.3037785 | 3227.574884 | -2.775656654 | 3.67E-34 | 3.24E-32 | GYS1       |
| ENSG00000011426 | 43.68628987 | 3435.439052 | -6.295492269 | 4.00E-34 | 3.53E-32 | ANLN       |
| ENSG00000186517 | 871.4462888 | 6.186201292 | 7.148896246  | 4.11E-34 | 3.61E-32 | ARHGAP30   |
| ENSG00000168078 | 11.06284707 | 1112.137674 | -6.645867421 | 4.57E-34 | 4.00E-32 | PBK        |
| ENSG00000187957 | 2.431602522 | 3259.953608 | -10.39165219 | 4.73E-34 | 4.13E-32 | DNER       |
| ENSG00000235092 | 446.0327691 | 6.685664122 | 6.042035968  | 4.94E-34 | 4.29E-32 | ID2-AS1    |
| ENSG00000164007 | 1605.889631 | 1.762625967 | 9.810578565  | 4.96E-34 | 4.29E-32 | CLDN19     |
| ENSG00000162063 | 44.03930676 | 598.9106032 | -3.767049308 | 5.64E-34 | 4.87E-32 | CCNF       |
| ENSG00000197329 | 1022.862948 | 116.8646276 | 3.127840063  | 5.99E-34 | 5.16E-32 | PEL1       |
| ENSG00000170571 | 802.5133956 | 3.465044647 | 7.820777851  | 7.53E-34 | 6.46E-32 | EMB        |
| ENSG00000094804 | 31.55127021 | 946.6564591 | -4.904912017 | 7.77E-34 | 6.64E-32 | CDC6       |
| ENSG00000005108 | 1212.849159 | 5.565296406 | 7.74550406   | 7.99E-34 | 6.81E-32 | THSD7A     |

|                 |             |             |              |          |          |          |
|-----------------|-------------|-------------|--------------|----------|----------|----------|
| ENSG00000124785 | 2817.336533 | 75.28820144 | 5.223557934  | 8.04E-34 | 6.83E-32 | NRN1     |
| ENSG00000168961 | 1199.99019  | 28.64106141 | 5.379576405  | 8.97E-34 | 7.59E-32 | LGALS9   |
| ENSG00000064787 | 5033.380514 | 0           | 14.63105     | 1.31E-33 | 1.11E-31 | BCAS1    |
| ENSG00000134285 | 185.7801965 | 1803.919424 | -3.27993129  | 1.37E-33 | 1.15E-31 | FKBP11   |
| ENSG00000123096 | 1620.874409 | 141.7349844 | 3.513339233  | 1.65E-33 | 1.38E-31 | SSPN     |
| ENSG00000185811 | 613.0566193 | 3.718798035 | 7.400964296  | 2.12E-33 | 1.77E-31 | IKZF1    |
| ENSG00000075218 | 17.9938531  | 1026.711431 | -5.831016291 | 2.25E-33 | 1.87E-31 | GTSE1    |
| ENSG00000152583 | 7518.043118 | 3.52640781  | 11.04773391  | 2.27E-33 | 1.88E-31 | SPARCL1  |
| ENSG00000165891 | 11.53997588 | 356.9121258 | -4.952603307 | 3.37E-33 | 2.79E-31 | E2F7     |
| ENSG00000163507 | 36.65248394 | 574.6877229 | -3.971392846 | 3.48E-33 | 2.87E-31 | CIP2A    |
| ENSG00000143476 | 17.71572731 | 497.6492589 | -4.80787285  | 4.02E-33 | 3.31E-31 | DTL      |
| ENSG00000112531 | 12134.28317 | 2210.757213 | 2.456411231  | 6.24E-33 | 5.11E-31 | QKI      |
| ENSG00000118640 | 653.7300099 | 9.061022635 | 6.152665339  | 8.11E-33 | 6.62E-31 | VAMP8    |
| ENSG00000118985 | 348.1072237 | 4451.545921 | -3.676625591 | 8.83E-33 | 7.19E-31 | ELL2     |
| ENSG00000165863 | 791.0003199 | 1.793307549 | 8.783961294  | 1.02E-32 | 8.29E-31 | C10orf82 |
| ENSG00000091651 | 62.14781206 | 682.6203946 | -3.458012745 | 1.03E-32 | 8.33E-31 | ORC6     |
| ENSG00000183287 | 1.535511275 | 782.0824851 | -9.009561631 | 1.10E-32 | 8.85E-31 | CCBE1    |
| ENSG00000170345 | 32204.14636 | 133.7649322 | 7.910882558  | 1.10E-32 | 8.88E-31 | FOS      |
| ENSG00000116701 | 398.474642  | 11.78102341 | 5.075809104  | 1.18E-32 | 9.50E-31 | NCF2     |
| ENSG00000171320 | 8.730781693 | 308.1872089 | -5.137284531 | 1.22E-32 | 9.75E-31 | ESCO2    |
| ENSG00000071073 | 1163.49807  | 1.782695063 | 9.341793438  | 1.49E-32 | 1.18E-30 | MGAT4A   |
| ENSG00000167972 | 1392.71205  | 28.22315924 | 5.615756037  | 1.63E-32 | 1.29E-30 | ABCA3    |
| ENSG00000111665 | 29.30230201 | 835.1601269 | -4.832574288 | 1.89E-32 | 1.50E-30 | CDCA3    |
| ENSG00000165304 | 50.59995828 | 1075.458681 | -4.408646372 | 1.96E-32 | 1.55E-30 | MELK     |
| ENSG00000133985 | 820.8040791 | 1.742556871 | 8.842938736  | 2.14E-32 | 1.69E-30 | TTC9     |
| ENSG00000220785 | 399.3897677 | 30.44942937 | 3.719318386  | 2.16E-32 | 1.69E-30 | MTMR9LP  |
| ENSG00000013810 | 206.1022115 | 2972.282493 | -3.850334025 | 2.30E-32 | 1.80E-30 | TACC3    |
| ENSG00000187764 | 640.0677006 | 51.85589743 | 3.621616719  | 2.53E-32 | 1.98E-30 | SEMA4D   |
| ENSG00000113368 | 110.6624179 | 1873.724672 | -4.08201675  | 2.89E-32 | 2.25E-30 | LMNB1    |
| ENSG00000188130 | 49.75848594 | 1512.565831 | -4.927553301 | 3.12E-32 | 2.42E-30 | MAPK12   |
| ENSG00000054356 | 8.553446699 | 766.4151763 | -6.490297054 | 3.55E-32 | 2.75E-30 | PTPRN    |
| ENSG00000173372 | 5058.324158 | 0           | 14.63817124  | 4.74E-32 | 3.65E-30 | C1QA     |
| ENSG00000169129 | 4384.111665 | 0           | 14.43182065  | 4.74E-32 | 3.65E-30 | AFAP1L2  |
| ENSG00000245848 | 735.5988538 | 6.613688473 | 6.774373031  | 5.70E-32 | 4.37E-30 | CEBPA    |
| ENSG00000054690 | 450.6212407 | 11.86245566 | 5.24882578   | 5.85E-32 | 4.47E-30 | PLEKHH1  |
| ENSG00000146013 | 5663.337782 | 0           | 14.80118702  | 7.69E-32 | 5.86E-30 | GFRA3    |
| ENSG00000040275 | 165.3701844 | 1479.394123 | -3.160849265 | 8.53E-32 | 6.48E-30 | SPDL1    |
| ENSG00000114346 | 94.09096263 | 1285.086837 | -3.772264876 | 1.04E-31 | 7.85E-30 | ECT2     |
| ENSG00000196814 | 1074.311915 | 150.3680875 | 2.836800521  | 1.15E-31 | 8.72E-30 | MVB12B   |
| ENSG00000118507 | 712.295125  | 83.51542751 | 3.091893989  | 1.17E-31 | 8.78E-30 | AKAP7    |
| ENSG00000168268 | 571.6353259 | 4641.250642 | -3.021320667 | 1.25E-31 | 9.37E-30 | NT5DC2   |
| ENSG00000131401 | 1710.483766 | 1.487519214 | 10.2085411   | 1.27E-31 | 9.53E-30 | NAPSB    |
| ENSG00000179915 | 6731.325919 | 0           | 15.05042015  | 1.38E-31 | 1.03E-29 | NRXN1    |
| ENSG00000029153 | 34.69181326 | 500.2107151 | -3.851741028 | 1.38E-31 | 1.03E-29 | ARNTL2   |
| ENSG00000136546 | 17595.2769  | 0.336469917 | 15.4748403   | 1.50E-31 | 1.12E-29 | SCN7A    |
| ENSG00000130203 | 22942.50806 | 1042.402552 | 4.46030943   | 1.69E-31 | 1.25E-29 | APOE     |
| ENSG00000011422 | 372.3189103 | 4021.149871 | -3.432994671 | 1.77E-31 | 1.31E-29 | PLAUR    |
| ENSG00000143195 | 408.5456657 | 2.812173909 | 7.157614873  | 1.93E-31 | 1.42E-29 | ILDR2    |
| ENSG00000198075 | 474.1717809 | 12.14933078 | 5.283854683  | 2.24E-31 | 1.64E-29 | SULT1C4  |
| ENSG00000173369 | 3675.342436 | 0           | 14.17739472  | 2.24E-31 | 1.64E-29 | C1QB     |
| ENSG00000138180 | 19.15922333 | 1277.673783 | -6.055986345 | 2.44E-31 | 1.78E-29 | CEP55    |

|                 |             |             |              |          |          |           |
|-----------------|-------------|-------------|--------------|----------|----------|-----------|
| ENSG00000213390 | 1968.228515 | 368.8336457 | 2.415196614  | 3.06E-31 | 2.23E-29 | ARHGAP19  |
| ENSG00000169403 | 580.7845406 | 3.964379082 | 7.198774275  | 3.16E-31 | 2.29E-29 | PTAFR     |
| ENSG00000167995 | 1128.66889  | 81.37850518 | 3.793718692  | 3.26E-31 | 2.36E-29 | BEST1     |
| ENSG0000013573  | 91.29735386 | 891.9355696 | -3.287296911 | 3.30E-31 | 2.38E-29 | DDX11     |
| ENSG00000136026 | 1076.320847 | 12520.98963 | -3.540270304 | 3.44E-31 | 2.48E-29 | CKAP4     |
| ENSG00000159189 | 3948.615864 | 0           | 14.28087156  | 3.81E-31 | 2.73E-29 | C1QC      |
| ENSG00000150753 | 1144.553096 | 6993.124933 | -2.611240209 | 4.19E-31 | 3.00E-29 | CCT5      |
| ENSG00000126016 | 413.5561182 | 19.3614149  | 4.427726641  | 4.98E-31 | 3.56E-29 | AMOT      |
| ENSG00000248441 | 704.158819  | 5.820334064 | 6.88250721   | 5.24E-31 | 3.73E-29 | LINC01197 |
| ENSG00000186684 | 298.6170472 | 10.50596351 | 4.836787667  | 5.38E-31 | 3.82E-29 | CYP27C1   |
| ENSG00000065328 | 15.1370199  | 443.4383417 | -4.873132092 | 7.05E-31 | 4.99E-29 | MCM10     |
| ENSG00000163873 | 6153.14547  | 0           | 14.92085542  | 8.32E-31 | 5.87E-29 | GRIK3     |
| ENSG00000204136 | 974.9403327 | 2.120320855 | 8.828550342  | 8.40E-31 | 5.92E-29 | GGTA1P    |
| ENSG00000122877 | 2702.213816 | 11.70776349 | 7.857167753  | 9.56E-31 | 6.72E-29 | EGR2      |
| ENSG00000051180 | 13.2377071  | 445.8842632 | -5.070863229 | 9.85E-31 | 6.89E-29 | RAD51     |
| ENSG00000188747 | 388.4330546 | 9.121101528 | 5.425684661  | 1.13E-30 | 7.88E-29 | NOXA1     |
| ENSG00000104738 | 346.4750814 | 3069.649301 | -3.147232775 | 1.17E-30 | 8.12E-29 | MCM4      |
| ENSG00000138356 | 94.05217009 | 3208.595479 | -5.093121789 | 1.22E-30 | 8.45E-29 | AOX1      |
| ENSG00000081189 | 1270.852924 | 108.8201596 | 3.544529199  | 1.22E-30 | 8.48E-29 | MEF2C     |
| ENSG00000260230 | 550.6736941 | 8.834226414 | 5.979558917  | 1.25E-30 | 8.62E-29 | FRRS1L    |
| ENSG00000156510 | 412.7898937 | 10.1494245  | 5.353177484  | 1.27E-30 | 8.78E-29 | HKDC1     |
| ENSG00000175592 | 97.65609561 | 5195.54101  | -5.733274748 | 1.28E-30 | 8.82E-29 | FOSL1     |
| ENSG00000001617 | 127.1871322 | 1311.85506  | -3.36617495  | 1.38E-30 | 9.47E-29 | SEMA3F    |
| ENSG00000115414 | 14651.28771 | 591146.1238 | -5.334419805 | 1.71E-30 | 1.17E-28 | FN1       |
| ENSG00000154330 | 468.9013228 | 2.079026788 | 7.77303661   | 1.83E-30 | 1.25E-28 | PGM5      |
| ENSG00000143119 | 1533.722198 | 1.161661783 | 10.46586748  | 1.84E-30 | 1.25E-28 | CD53      |
| ENSG00000196502 | 616.3962522 | 11.83421423 | 5.684799709  | 2.06E-30 | 1.40E-28 | SULT1A1   |
| ENSG00000168496 | 205.5880148 | 1478.54703  | -2.846101841 | 2.22E-30 | 1.50E-28 | FEN1      |
| ENSG00000141576 | 493.6744782 | 10.24146924 | 5.604172933  | 3.22E-30 | 2.18E-28 | RNF157    |
| ENSG00000118322 | 786.041825  | 3.718798035 | 7.755001891  | 3.44E-30 | 2.31E-28 | ATP10B    |
| ENSG00000177133 | 1316.142459 | 1.365948763 | 9.852649167  | 3.59E-30 | 2.41E-28 | PRDM16-DT |
| ENSG00000135678 | 249.0325195 | 2672.915974 | -3.424402249 | 4.03E-30 | 2.70E-28 | CPM       |
| ENSG00000100077 | 526.6542553 | 74.03521843 | 2.833118657  | 4.22E-30 | 2.82E-28 | GRK3      |
| ENSG00000204323 | 672.950268  | 14.08440627 | 5.568186881  | 4.24E-30 | 2.82E-28 | SMIM5     |
| ENSG00000100162 | 16.84603396 | 484.1135379 | -4.842092594 | 4.49E-30 | 2.98E-28 | CENPM     |
| ENSG00000184261 | 2910.182821 | 5.420060839 | 9.071473676  | 5.15E-30 | 3.42E-28 | KCNK12    |
| ENSG00000145569 | 602.4776393 | 22.81944308 | 4.71955501   | 5.18E-30 | 3.42E-28 | OTULINL   |
| ENSG00000142611 | 919.4578207 | 4.668000497 | 7.622630911  | 5.20E-30 | 3.43E-28 | PRDM16    |
| ENSG00000149554 | 57.92868564 | 692.9561729 | -3.579791645 | 5.90E-30 | 3.88E-28 | CHEK1     |
| ENSG00000100196 | 309.2713883 | 1969.751604 | -2.671295584 | 6.73E-30 | 4.41E-28 | KDELR3    |
| ENSG00000051341 | 13.21757745 | 392.9654141 | -4.88962864  | 7.74E-30 | 5.06E-28 | POLQ      |
| ENSG00000145476 | 1178.552812 | 126.9703179 | 3.213851477  | 7.86E-30 | 5.13E-28 | CYP4V2    |
| ENSG00000011600 | 3163.815252 | 0           | 13.96117041  | 1.03E-29 | 6.70E-28 | TYROBP    |
| ENSG00000116117 | 1381.073408 | 145.4367015 | 3.248289986  | 1.24E-29 | 8.08E-28 | PARD3B    |
| ENSG00000106066 | 956.9105796 | 3.108505634 | 8.231440545  | 1.37E-29 | 8.85E-28 | CPVL      |
| ENSG00000099204 | 2665.203818 | 95.9556146  | 4.793663275  | 1.40E-29 | 9.04E-28 | ABLIM1    |
| ENSG00000175600 | 26.37623305 | 271.8650254 | -3.366376667 | 1.47E-29 | 9.49E-28 | SUGCT     |
| ENSG00000104490 | 768.8954542 | 35.64184208 | 4.425396161  | 2.01E-29 | 1.30E-27 | NCALD     |
| ENSG00000100234 | 25628.34261 | 453.3050135 | 5.82057724   | 2.71E-29 | 1.74E-27 | TIMP3     |
| ENSG00000105357 | 924.38849   | 5.685582588 | 7.382397251  | 3.11E-29 | 1.99E-27 | MYH14     |
| ENSG00000149564 | 315.4329505 | 14.84810658 | 4.415368208  | 3.69E-29 | 2.36E-27 | ESAM      |



|                 |             |             |              |          |          |            |
|-----------------|-------------|-------------|--------------|----------|----------|------------|
| ENSG00000151883 | 1017.358243 | 198.4025297 | 2.357424016  | 3.81E-29 | 2.43E-27 | PARP8      |
| ENSG00000158528 | 1603.955899 | 5.474407537 | 8.16678191   | 4.40E-29 | 2.79E-27 | PPP1R9A    |
| ENSG00000214160 | 293.0515975 | 1332.89468  | -2.185232916 | 4.68E-29 | 2.96E-27 | ALG3       |
| ENSG00000170954 | 284.7649224 | 23.47000207 | 3.594473494  | 5.29E-29 | 3.35E-27 | ZNF415     |
| ENSG00000169860 | 424.9426052 | 3.943154111 | 6.750066805  | 5.47E-29 | 3.45E-27 | P2RY1      |
| ENSG00000121152 | 29.38769302 | 778.5623143 | -4.724772386 | 6.13E-29 | 3.85E-27 | NCAPH      |
| ENSG00000131473 | 1771.442127 | 6391.338113 | -1.851232717 | 6.48E-29 | 4.07E-27 | ACLY       |
| ENSG00000237515 | 689.9978801 | 9.192049696 | 6.22080748   | 6.81E-29 | 4.26E-27 | SHISA9     |
| ENSG00000100526 | 29.95683709 | 490.1561731 | -4.032648867 | 6.88E-29 | 4.29E-27 | CDKN3      |
| ENSG00000135476 | 28.79995767 | 668.4363189 | -4.533767549 | 6.92E-29 | 4.31E-27 | ESPL1      |
| ENSG00000188488 | 1439.101304 | 1.069617038 | 10.38500673  | 7.27E-29 | 4.52E-27 | SERPINA5   |
| ENSG00000078596 | 660.9632183 | 1.365948763 | 8.853252299  | 7.54E-29 | 4.67E-27 | ITM2A      |
| ENSG00000165168 | 2767.009595 | 0           | 13.76783079  | 7.76E-29 | 4.80E-27 | CYBB       |
| ENSG00000203747 | 2516.715092 | 0           | 13.63106411  | 9.57E-29 | 5.91E-27 | FCGR3A     |
| ENSG00000187741 | 58.16139499 | 718.7900566 | -3.626235477 | 1.24E-28 | 7.66E-27 | FANCA      |
| ENSG00000117266 | 979.3411517 | 11.12815267 | 6.459496114  | 1.64E-28 | 1.01E-26 | CDK18      |
| ENSG00000069493 | 728.4235308 | 60.48570846 | 3.591297132  | 1.78E-28 | 1.09E-26 | CLEC2D     |
| novel.601       | 0           | 2111.068866 | -13.62502343 | 2.04E-28 | 1.24E-26 | -          |
| ENSG00000146859 | 810.3500978 | 138.5857798 | 2.548679631  | 2.06E-28 | 1.26E-26 | TMEM140    |
| ENSG00000174371 | 6.860445348 | 405.5324846 | -5.875183287 | 2.26E-28 | 1.37E-26 | EXO1       |
| ENSG00000118193 | 13.91118945 | 585.1635527 | -5.39409505  | 2.38E-28 | 1.44E-26 | KIF14      |
| ENSG00000148841 | 430.1279723 | 4035.89395  | -3.230043888 | 2.80E-28 | 1.69E-26 | ITPRIP     |
| novel.984       | 5206.291349 | 0           | 14.67977424  | 2.94E-28 | 1.78E-26 | -          |
| ENSG00000132854 | 2393.434687 | 0.672939833 | 11.70685118  | 3.13E-28 | 1.89E-26 | KANK4      |
| ENSG00000117308 | 182.3683657 | 1369.682786 | -2.909192344 | 3.36E-28 | 2.02E-26 | GALE       |
| ENSG00000106263 | 1835.35108  | 6751.894858 | -1.879226508 | 3.85E-28 | 2.31E-26 | EIF3B      |
| ENSG00000100321 | 1323.275328 | 249.2259945 | 2.408991158  | 4.05E-28 | 2.43E-26 | SYNGR1     |
| ENSG00000075884 | 4572.029642 | 0.336469917 | 13.5305761   | 4.30E-28 | 2.57E-26 | ARHGAP15   |
| ENSG00000206579 | 2445.902724 | 0           | 13.58991327  | 4.74E-28 | 2.82E-26 | XKR4       |
| ENSG00000179409 | 212.0816097 | 959.9837366 | -2.178297088 | 5.60E-28 | 3.33E-26 | GEMIN4     |
| ENSG00000123473 | 41.33437958 | 460.840922  | -3.477718137 | 6.61E-28 | 3.92E-26 | STIL       |
| ENSG00000024422 | 2051.58594  | 9104.40724  | -2.149844126 | 6.88E-28 | 4.07E-26 | EHD2       |
| ENSG00000164087 | 37.37854862 | 429.8014449 | -3.522036977 | 7.12E-28 | 4.20E-26 | POC1A      |
| ENSG00000173269 | 345.0743367 | 8.836666559 | 5.275433501  | 7.17E-28 | 4.22E-26 | MMRN2      |
| ENSG00000144619 | 479.800269  | 3.881790948 | 6.933029716  | 9.60E-28 | 5.64E-26 | CNTN4      |
| ENSG00000126785 | 4924.245765 | 11.28412911 | 8.756229426  | 9.94E-28 | 5.83E-26 | RHOJ       |
| ENSG00000110799 | 1485.086143 | 6.15680398  | 7.887856949  | 1.02E-27 | 5.98E-26 | VWF        |
| ENSG00000167900 | 48.11506142 | 2438.536388 | -5.661706345 | 1.02E-27 | 5.98E-26 | TK1        |
| ENSG00000157470 | 458.6030048 | 12.96403855 | 5.13007447   | 1.06E-27 | 6.19E-26 | FAM81A     |
| ENSG00000161800 | 122.2581245 | 1670.708686 | -3.772856012 | 1.07E-27 | 6.20E-26 | RACGAP1    |
| ENSG00000106089 | 58.46111789 | 830.7767117 | -3.82790772  | 1.11E-27 | 6.41E-26 | STX1A      |
| ENSG00000172264 | 584.0295665 | 4.515748464 | 6.988195713  | 1.12E-27 | 6.46E-26 | MACROD2    |
| ENSG00000198431 | 1153.898793 | 7253.019657 | -2.652124778 | 1.35E-27 | 7.78E-26 | TXNRD1     |
| ENSG00000166689 | 1032.624361 | 12.4953857  | 6.354110974  | 1.44E-27 | 8.27E-26 | PLEKHA7    |
| ENSG00000158402 | 2.081662396 | 273.6278269 | -7.016970943 | 1.58E-27 | 9.09E-26 | CDC25C     |
| ENSG00000151503 | 311.1652596 | 1252.162496 | -2.008719714 | 1.80E-27 | 1.03E-25 | NCAPD3     |
| ENSG00000160298 | 79.7488159  | 476.4843907 | -2.578062182 | 1.81E-27 | 1.04E-25 | C21orf58   |
| ENSG00000197757 | 4.616563014 | 443.7682619 | -6.599866278 | 2.00E-27 | 1.14E-25 | HOXC6      |
| ENSG00000111348 | 2994.359226 | 119.8424914 | 4.641263238  | 2.30E-27 | 1.31E-25 | ARHGDI5    |
| ENSG00000279118 | 496.9031758 | 24.03198393 | 4.362849017  | 2.35E-27 | 1.33E-25 | AC093535.2 |
| ENSG0000025772  | 336.6370531 | 1772.94411  | -2.397157354 | 2.54E-27 | 1.44E-25 | TOMM34     |

|                 |             |             |              |          |          |          |
|-----------------|-------------|-------------|--------------|----------|----------|----------|
| ENSG00000163412 | 791.6616089 | 62.19655627 | 3.668986487  | 2.85E-27 | 1.61E-25 | EIF4E3   |
| ENSG00000096063 | 173.2456324 | 987.7393729 | -2.511174137 | 3.23E-27 | 1.82E-25 | SRPK1    |
| ENSG00000167553 | 741.4270892 | 7638.034943 | -3.364790678 | 3.26E-27 | 1.84E-25 | TUBA1C   |
| ENSG00000140968 | 1217.773425 | 1.069617038 | 10.14405789  | 3.45E-27 | 1.94E-25 | IRF8     |
| ENSG00000125844 | 2812.678627 | 11153.20149 | -1.987438433 | 3.47E-27 | 1.95E-25 | RRBP1    |
| ENSG00000141540 | 1346.518844 | 96.89248795 | 3.797388716  | 3.51E-27 | 1.97E-25 | TTYH2    |
| ENSG00000198948 | 792.2821224 | 49.12844783 | 4.015431396  | 3.53E-27 | 1.97E-25 | MFAP3L   |
| ENSG00000169554 | 9745.066093 | 744.1057263 | 3.711216283  | 3.65E-27 | 2.04E-25 | ZEB2     |
| ENSG00000173457 | 851.0674928 | 4052.07912  | -2.251418576 | 4.04E-27 | 2.25E-25 | PPP1R14B |
| ENSG00000123219 | 39.79378244 | 632.1166695 | -3.988710796 | 4.07E-27 | 2.26E-25 | CENPK    |
| ENSG00000170312 | 51.75286329 | 2072.299544 | -5.322661152 | 4.07E-27 | 2.26E-25 | CDK1     |
| ENSG00000122122 | 560.0967299 | 2.058957692 | 8.037151458  | 4.82E-27 | 2.67E-25 | SASH3    |
| ENSG00000166091 | 2031.979101 | 0           | 13.32244634  | 4.97E-27 | 2.74E-25 | CMTM5    |
| ENSG00000143412 | 497.5720712 | 29.64674675 | 4.06708359   | 5.22E-27 | 2.88E-25 | ANXA9    |
| ENSG00000144843 | 418.9488915 | 42.52935304 | 3.294423267  | 5.43E-27 | 2.98E-25 | ADPRH    |
| ENSG00000120539 | 132.0467189 | 676.6862641 | -2.357070994 | 6.05E-27 | 3.32E-25 | MASTL    |
| ENSG00000137877 | 787.5116602 | 45.1360841  | 4.122037503  | 6.35E-27 | 3.46E-25 | SPTBN5   |
| ENSG00000187140 | 2380.082967 | 0           | 13.55056614  | 6.35E-27 | 3.46E-25 | FOXD3    |
| ENSG00000111247 | 54.47784885 | 381.4294581 | -2.808035355 | 6.53E-27 | 3.56E-25 | RAD51AP1 |
| ENSG00000186185 | 12.15049072 | 961.6388032 | -6.307748047 | 7.12E-27 | 3.87E-25 | KIF18B   |
| ENSG00000149948 | 139.2191823 | 10552.88731 | -6.243621827 | 7.59E-27 | 4.12E-25 | HMGA2    |
| ENSG00000103089 | 912.3641875 | 1.060160428 | 9.728856116  | 7.64E-27 | 4.14E-25 | FA2H     |
| ENSG00000065308 | 1212.835331 | 7134.820328 | -2.556565821 | 8.15E-27 | 4.40E-25 | TRAM2    |
| ENSG00000090104 | 1653.483736 | 0           | 13.0250571   | 8.30E-27 | 4.47E-25 | RGS1     |
| ENSG00000105516 | 401.7226157 | 27.98433787 | 3.84993049   | 9.33E-27 | 5.02E-25 | DBP      |
| ENSG00000113643 | 752.0478659 | 2889.286055 | -1.941750147 | 9.68E-27 | 5.19E-25 | RARS     |
| ENSG00000149599 | 805.6000314 | 1.396630344 | 9.138939925  | 9.71E-27 | 5.20E-25 | DUSP15   |
| ENSG00000169302 | 702.47565   | 17.06877291 | 5.368178849  | 1.20E-26 | 6.41E-25 | STK32A   |
| ENSG00000154930 | 1269.769518 | 108.1448268 | 3.552098344  | 1.45E-26 | 7.73E-25 | ACSS1    |
| ENSG00000235505 | 1208.584747 | 1.742556871 | 9.40766019   | 1.53E-26 | 8.14E-25 | CASP17P  |
| ENSG00000103710 | 503.3780661 | 2.527610546 | 7.644528623  | 1.73E-26 | 9.18E-25 | RASL12   |
| ENSG00000132122 | 1051.932673 | 108.5222868 | 3.277990192  | 1.88E-26 | 9.96E-25 | SPATA6   |
| ENSG00000100784 | 593.0393306 | 20.12408772 | 4.889449003  | 1.91E-26 | 1.01E-24 | RPS6KA5  |
| ENSG00000013441 | 5873.125571 | 834.0617164 | 2.815968376  | 2.06E-26 | 1.09E-24 | CLK1     |
| ENSG00000171877 | 636.4665292 | 21.22682649 | 4.90719526   | 2.09E-26 | 1.10E-24 | FRMD5    |
| ENSG00000067225 | 6441.713867 | 43512.24109 | -2.755906828 | 2.14E-26 | 1.13E-24 | PKM      |
| ENSG00000095970 | 1538.347755 | 0           | 12.92090848  | 2.16E-26 | 1.13E-24 | TREM2    |
| ENSG00000187123 | 320.0404963 | 34.75973498 | 3.207734489  | 2.30E-26 | 1.20E-24 | LYPD6    |
| ENSG00000182481 | 478.8141007 | 5642.791767 | -3.558940048 | 2.33E-26 | 1.22E-24 | KPNA2    |
| ENSG00000129538 | 2175.678385 | 0           | 13.42102293  | 2.39E-26 | 1.24E-24 | RNASE1   |
| ENSG00000066336 | 1555.074104 | 0           | 12.93647518  | 2.58E-26 | 1.35E-24 | SPI1     |
| ENSG00000100399 | 1457.183194 | 5.279577167 | 8.097653918  | 2.88E-26 | 1.49E-24 | CHADL    |
| ENSG00000148218 | 3507.629236 | 645.3293116 | 2.442132509  | 3.11E-26 | 1.61E-24 | ALAD     |
| ENSG00000110077 | 1935.932466 | 0           | 13.25252417  | 3.16E-26 | 1.63E-24 | MS4A6A   |
| ENSG00000123329 | 482.7499428 | 1.753169357 | 8.077012112  | 3.30E-26 | 1.70E-24 | ARHGAP9  |
| ENSG00000130755 | 526.0064425 | 11.04543614 | 5.587916008  | 4.04E-26 | 2.08E-24 | GMFG     |
| ENSG00000108018 | 4227.003082 | 0.356539013 | 13.41737866  | 4.32E-26 | 2.22E-24 | SORCS1   |
| ENSG00000126878 | 1599.906086 | 1.345879667 | 10.14698061  | 4.46E-26 | 2.29E-24 | AIF1L    |
| ENSG00000198794 | 425.9544761 | 43.5242975  | 3.295616124  | 4.67E-26 | 2.39E-24 | SCAMP5   |
| ENSG00000242808 | 1089.863042 | 1.049547942 | 9.987636577  | 4.69E-26 | 2.40E-24 | SOX2-OT  |
| ENSG00000076864 | 758.6498892 | 25.00801517 | 4.931723493  | 4.79E-26 | 2.45E-24 | RAP1GAP  |

|                 |             |             |              |          |          |           |
|-----------------|-------------|-------------|--------------|----------|----------|-----------|
| ENSG00000168329 | 3535.490281 | 0.356539013 | 13.15962052  | 5.14E-26 | 2.62E-24 | CX3CR1    |
| ENSG00000109610 | 2344.827851 | 59.71756023 | 5.292276624  | 5.30E-26 | 2.70E-24 | SOD3      |
| ENSG00000147799 | 2284.194722 | 124.4035966 | 4.198525919  | 5.68E-26 | 2.88E-24 | ARHGAP39  |
| ENSG00000107099 | 1131.772687 | 4.057708096 | 8.083111983  | 5.75E-26 | 2.91E-24 | DOCK8     |
| ENSG00000131153 | 29.96443026 | 593.4893993 | -4.308241337 | 5.93E-26 | 3.00E-24 | GINS2     |
| ENSG00000128228 | 277.94599   | 1315.144504 | -2.242293338 | 6.07E-26 | 3.06E-24 | SDF2L1    |
| ENSG00000004700 | 342.3857504 | 1336.200315 | -1.964525051 | 6.55E-26 | 3.30E-24 | RECQL     |
| ENSG00000105227 | 13575.54922 | 112.4334751 | 6.916108195  | 6.70E-26 | 3.37E-24 | PRX       |
| ENSG00000112984 | 24.22372523 | 1865.811    | -6.264922985 | 6.71E-26 | 3.37E-24 | KIF20A    |
| ENSG00000183578 | 69.38327051 | 459.4700117 | -2.727751092 | 7.06E-26 | 3.54E-24 | TNFAIP8L3 |
| ENSG00000106538 | 7705.524759 | 59.37664239 | 7.01672709   | 7.30E-26 | 3.65E-24 | RARRES2   |
| ENSG00000173320 | 638.06793   | 3.52640781  | 7.48456905   | 7.58E-26 | 3.78E-24 | STOX2     |
| ENSG00000177875 | 1582.141763 | 60.8125462  | 4.704801444  | 8.33E-26 | 4.15E-24 | CCDC184   |
| ENSG00000117724 | 105.8612553 | 2461.957042 | -4.53874324  | 8.40E-26 | 4.17E-24 | CENPF     |
| ENSG00000198771 | 841.9045116 | 37.66279776 | 4.484864657  | 9.83E-26 | 4.88E-24 | RCSD1     |
| ENSG00000186462 | 380.9791751 | 5.14739423  | 6.17167443   | 1.05E-25 | 5.21E-24 | NAP1L2    |
| ENSG00000087250 | 691.2182294 | 4.849778236 | 7.182846327  | 1.10E-25 | 5.45E-24 | MT3       |
| ENSG00000139946 | 550.8647873 | 55.56035856 | 3.311269322  | 1.13E-25 | 5.57E-24 | PELI2     |
| ENSG00000105695 | 1410.458979 | 1.386017859 | 9.953221042  | 1.23E-25 | 6.04E-24 | MAG       |
| ENSG00000125148 | 3466.512865 | 47783.36142 | -3.784924062 | 1.26E-25 | 6.19E-24 | MT2A      |
| ENSG00000164466 | 510.1588174 | 2354.516844 | -2.206270639 | 1.36E-25 | 6.65E-24 | SFXN1     |
| ENSG00000197461 | 1340.274636 | 159.5854249 | 3.072101513  | 1.36E-25 | 6.65E-24 | PDGFA     |
| ENSG00000158457 | 559.107085  | 13.36174324 | 5.390332989  | 1.57E-25 | 7.67E-24 | TSPAN33   |
| ENSG00000121207 | 1331.868967 | 1.161661783 | 10.25403094  | 1.70E-25 | 8.29E-24 | LRAT      |
| ENSG00000042088 | 132.1261976 | 712.5523683 | -2.430545359 | 1.92E-25 | 9.34E-24 | TDP1      |
| ENSG00000144485 | 407.411538  | 7.633710709 | 5.713861695  | 1.93E-25 | 9.37E-24 | HES6      |
| ENSG00000120057 | 2458.568498 | 0.356539013 | 12.63553367  | 1.96E-25 | 9.52E-24 | SFRP5     |
| ENSG00000088320 | 786.9235003 | 1.386017859 | 9.107597067  | 1.99E-25 | 9.63E-24 | REM1      |
| ENSG00000244682 | 793.8425799 | 1.753169357 | 8.798012333  | 2.36E-25 | 1.14E-23 | FCGR2C    |
| ENSG00000198133 | 309.8212576 | 4.179278547 | 6.183125889  | 2.78E-25 | 1.34E-23 | TMEM229B  |
| ENSG00000130508 | 935.8482265 | 13952.2101  | -3.898159356 | 2.85E-25 | 1.37E-23 | PXDN      |
| ENSG00000171793 | 232.7615849 | 1906.042793 | -3.033913246 | 2.85E-25 | 1.37E-23 | CTPS1     |
| ENSG00000106278 | 2377.973429 | 0.356539013 | 12.58746794  | 3.03E-25 | 1.45E-23 | PTPRZ1    |
| ENSG00000156298 | 369.3565134 | 2.241891306 | 7.411101492  | 3.10E-25 | 1.48E-23 | TSPAN7    |
| ENSG00000161381 | 478.8820373 | 4.963176346 | 6.582448421  | 3.41E-25 | 1.63E-23 | PLXDC1    |
| ENSG00000175161 | 2236.907118 | 0           | 13.46105936  | 3.59E-25 | 1.71E-23 | CADM2     |
| ENSG00000137460 | 689.3778646 | 16.7522437  | 5.378112612  | 3.65E-25 | 1.74E-23 | FHDC1     |
| ENSG00000084676 | 1392.882702 | 261.5450776 | 2.411849649  | 4.08E-25 | 1.94E-23 | NCOA1     |
| ENSG00000205269 | 450.9520323 | 20.779527   | 4.430502081  | 4.15E-25 | 1.97E-23 | TMEM170B  |
| ENSG00000230798 | 1492.366558 | 0           | 12.87716707  | 4.17E-25 | 1.97E-23 | FOXD3-AS1 |
| ENSG00000185518 | 491.9431509 | 2.762579107 | 7.438589902  | 4.52E-25 | 2.14E-23 | SV2B      |
| ENSG00000100522 | 165.6031785 | 1047.598166 | -2.661239502 | 5.02E-25 | 2.37E-23 | GNPNAT1   |
| ENSG00000108381 | 2830.113412 | 7.839153564 | 8.477323268  | 5.45E-25 | 2.56E-23 | ASPA      |
| ENSG00000111206 | 33.82162171 | 1196.36668  | -5.142372819 | 5.53E-25 | 2.60E-23 | FOXMI     |
| ENSG00000106078 | 3013.785503 | 0.336469917 | 12.92932666  | 5.62E-25 | 2.64E-23 | COBL      |
| ENSG00000142583 | 788.8981036 | 21.38139027 | 5.209074628  | 6.41E-25 | 3.00E-23 | SLC2A5    |
| ENSG00000143479 | 73.45472259 | 753.5386058 | -3.358023311 | 6.69E-25 | 3.13E-23 | DYRK3     |
| ENSG00000182752 | 168.4949435 | 5565.824417 | -5.045385606 | 7.45E-25 | 3.48E-23 | PAPPA     |
| ENSG00000042980 | 1432.708908 | 20.97153204 | 6.105614903  | 8.31E-25 | 3.87E-23 | ADAM28    |
| ENSG00000117115 | 690.7348744 | 16.5882233  | 5.390809767  | 8.79E-25 | 4.09E-23 | PADI2     |
| ENSG00000114805 | 561.046363  | 1.773238453 | 8.29214533   | 9.34E-25 | 4.33E-23 | PLCH1     |

|                 |             |             |              |          |          |            |
|-----------------|-------------|-------------|--------------|----------|----------|------------|
| ENSG00000204767 | 5.16780002  | 728.4531139 | -7.14128441  | 9.61E-25 | 4.45E-23 | INSYN2B    |
| ENSG00000131773 | 1755.957677 | 129.538499  | 3.758805959  | 9.73E-25 | 4.50E-23 | KHDRBS3    |
| ENSG00000108830 | 208.8269836 | 9.099876557 | 4.532524031  | 9.81E-25 | 4.52E-23 | RND2       |
| ENSG00000165025 | 1261.440355 | 0           | 12.63455189  | 9.89E-25 | 4.56E-23 | SYK        |
| ENSG00000163918 | 121.2194444 | 659.1443092 | -2.443498602 | 1.07E-24 | 4.91E-23 | RFC4       |
| ENSG00000082996 | 2097.797203 | 454.8897364 | 2.204779408  | 1.08E-24 | 4.94E-23 | RNF13      |
| ENSG00000159713 | 762.7169368 | 6.489677877 | 6.878856677  | 1.08E-24 | 4.96E-23 | TPPP3      |
| ENSG00000166851 | 53.32702421 | 1921.399378 | -5.169890823 | 1.11E-24 | 5.10E-23 | PLK1       |
| ENSG00000112029 | 86.80618425 | 597.5017249 | -2.783967979 | 1.14E-24 | 5.23E-23 | FBXO5      |
| ENSG00000117385 | 980.5015997 | 3981.189066 | -2.021534136 | 1.17E-24 | 5.35E-23 | P3H1       |
| ENSG00000177301 | 1185.500713 | 0           | 12.54507317  | 1.22E-24 | 5.56E-23 | KCNA2      |
| ENSG00000164683 | 708.5901246 | 74.31610456 | 3.254668705  | 1.29E-24 | 5.88E-23 | HEY1       |
| ENSG00000150625 | 1127.175313 | 0           | 12.47220425  | 1.39E-24 | 6.32E-23 | GPM6A      |
| ENSG00000102384 | 25.57932295 | 358.2254914 | -3.805620059 | 1.48E-24 | 6.69E-23 | CENPI      |
| ENSG00000179218 | 6276.518852 | 36774.24612 | -2.550661743 | 1.57E-24 | 7.09E-23 | CALR       |
| ENSG00000115956 | 1026.852514 | 0           | 12.33773795  | 1.82E-24 | 8.22E-23 | PLEK       |
| ENSG00000198892 | 1543.441861 | 358.4177535 | 2.106860573  | 1.89E-24 | 8.49E-23 | SHISA4     |
| ENSG00000168528 | 17.69957207 | 8197.92547  | -8.856403101 | 1.90E-24 | 8.56E-23 | SERINC2    |
| ENSG00000165959 | 1115.064933 | 47.24669155 | 4.561969749  | 2.00E-24 | 8.96E-23 | CLMN       |
| ENSG00000151322 | 176.0508522 | 5.084746798 | 5.126509278  | 2.04E-24 | 9.15E-23 | NPAS3      |
| ENSG00000244055 | 416.2807637 | 17.95661221 | 4.53554419   | 2.11E-24 | 9.46E-23 | AC007566.1 |
| ENSG00000085514 | 391.3322386 | 10.69950961 | 5.209747302  | 2.24E-24 | 1.00E-22 | PILRA      |
| ENSG00000116285 | 402.2264828 | 7884.534458 | -4.293128592 | 2.35E-24 | 1.05E-22 | ERRF11     |
| ENSG00000165490 | 10.89554126 | 227.8324504 | -4.386574002 | 2.38E-24 | 1.06E-22 | DDIAS      |
| ENSG00000018236 | 2995.610375 | 13.75482442 | 7.775329403  | 2.43E-24 | 1.08E-22 | CNTN1      |
| ENSG00000095370 | 241.9635119 | 5.430673325 | 5.485206979  | 2.45E-24 | 1.09E-22 | SH2D3C     |
| ENSG00000136810 | 1315.574762 | 6187.613439 | -2.233759577 | 2.47E-24 | 1.09E-22 | TXN        |
| ENSG00000060558 | 283.9599485 | 1.803920035 | 7.305194923  | 2.58E-24 | 1.14E-22 | GNA15      |
| ENSG00000153976 | 0.908699006 | 769.0072193 | -9.725336917 | 2.99E-24 | 1.32E-22 | HS3ST3A1   |
| ENSG00000119535 | 1329.591688 | 0.672939833 | 10.85944308  | 3.50E-24 | 1.54E-22 | CSF3R      |
| ENSG00000128242 | 1893.653213 | 0.387220594 | 12.25892679  | 3.65E-24 | 1.60E-22 | GAL3ST1    |
| ENSG00000260423 | 229.2371816 | 2.904218654 | 6.315837534  | 3.81E-24 | 1.67E-22 | LINC02367  |
| ENSG00000146147 | 2246.26931  | 2.475703993 | 9.814229659  | 4.01E-24 | 1.76E-22 | MLIP       |
| ENSG00000185477 | 574.9543154 | 5.685582588 | 6.696985958  | 4.62E-24 | 2.02E-22 | GPRIN3     |
| ENSG00000109956 | 1565.332886 | 0           | 12.94595949  | 4.87E-24 | 2.13E-22 | B3GAT1     |
| ENSG00000179776 | 362.8645987 | 2.191140629 | 7.391414658  | 5.36E-24 | 2.34E-22 | CDH5       |
| ENSG00000179715 | 224.6911793 | 13.68644479 | 4.039818529  | 5.43E-24 | 2.36E-22 | PCED1B     |
| ENSG00000037965 | 1.233423615 | 333.9256271 | -8.104189241 | 5.56E-24 | 2.42E-22 | HOXC8      |
| ENSG00000165071 | 289.4858947 | 13.62379736 | 4.425994919  | 5.57E-24 | 2.42E-22 | TMEM71     |
| ENSG00000197415 | 5.994584213 | 290.8107558 | -5.592276893 | 5.68E-24 | 2.46E-22 | VEPH1      |
| ENSG00000169291 | 312.1849642 | 1.733100261 | 7.449449706  | 6.43E-24 | 2.78E-22 | SHE        |
| ENSG00000137812 | 16.12226311 | 667.4561777 | -5.366862271 | 6.70E-24 | 2.89E-22 | KNL1       |
| ENSG00000171819 | 4058.678753 | 0.356539013 | 13.35872887  | 6.89E-24 | 2.97E-22 | ANGPTL7    |
| ENSG00000145824 | 2016.963652 | 0.774441189 | 11.4440781   | 7.33E-24 | 3.15E-22 | CXCL14     |
| ENSG00000082074 | 1124.390592 | 0           | 12.46861469  | 7.40E-24 | 3.18E-22 | FYB1       |
| ENSG00000154065 | 407.6476801 | 60.06665041 | 2.763804668  | 7.54E-24 | 3.23E-22 | ANKRD29    |
| ENSG00000171867 | 15019.72173 | 2508.920199 | 2.581760824  | 7.56E-24 | 3.24E-22 | PRNP       |
| ENSG00000111602 | 196.4990869 | 1249.377608 | -2.668874883 | 7.93E-24 | 3.39E-22 | TIMELESS   |
| ENSG00000085840 | 12.67393362 | 271.3972372 | -4.419237853 | 7.96E-24 | 3.40E-22 | ORC1       |
| ENSG00000253636 | 394.3585178 | 9.641789329 | 5.351369867  | 8.00E-24 | 3.41E-22 | AC02893.1  |
| ENSG00000127616 | 1233.005014 | 3900.213564 | -1.661370466 | 8.18E-24 | 3.48E-22 | SMARCA4    |

|                 |             |             |              |          |          |             |
|-----------------|-------------|-------------|--------------|----------|----------|-------------|
| ENSG00000152952 | 548.8259903 | 9313.729305 | -4.085059843 | 9.27E-24 | 3.94E-22 | PLOD2       |
| ENSG00000198286 | 470.9843529 | 16.73602741 | 4.800861608  | 1.02E-23 | 4.34E-22 | CARD11      |
| ENSG00000086062 | 696.8572718 | 5662.272436 | -3.022515514 | 1.04E-23 | 4.40E-22 | B4GALT1     |
| ENSG00000239445 | 646.3854331 | 7.735212064 | 6.373301535  | 1.54E-23 | 6.52E-22 | ST3GAL6-AS1 |
| ENSG00000145386 | 93.7619076  | 2053.901904 | -4.452922356 | 1.69E-23 | 7.13E-22 | CCNA2       |
| ENSG00000130309 | 2058.880108 | 9362.416821 | -2.184983653 | 1.72E-23 | 7.26E-22 | COLGALT1    |
| ENSG00000110446 | 3413.589754 | 244.6243531 | 3.803750113  | 1.87E-23 | 7.86E-22 | SLC15A3     |
| ENSG00000171848 | 36.38019946 | 3407.505383 | -6.547743673 | 1.90E-23 | 7.96E-22 | RRM2        |
| ENSG00000189056 | 7522.300117 | 158.9428752 | 5.563298252  | 1.94E-23 | 8.15E-22 | RELN        |
| ENSG00000125851 | 1109.671026 | 0           | 12.44961944  | 1.96E-23 | 8.21E-22 | PCSK2       |
| ENSG00000038945 | 1643.304738 | 0.336469917 | 12.05430582  | 2.14E-23 | 8.96E-22 | MSR1        |
| ENSG00000095585 | 537.2225208 | 1.110911105 | 8.959363771  | 2.39E-23 | 9.97E-22 | BLNK        |
| ENSG00000139910 | 214.0251562 | 23.74498042 | 3.173699433  | 2.40E-23 | 9.97E-22 | NOVA1       |
| ENSG00000100116 | 111.8506389 | 638.4716778 | -2.513453924 | 2.50E-23 | 1.04E-21 | GCAT        |
| ENSG00000100364 | 3173.911658 | 878.0703823 | 1.853808435  | 2.63E-23 | 1.09E-21 | KIAA0930    |
| ENSG00000177303 | 2006.756947 | 339.7093375 | 2.561631993  | 3.00E-23 | 1.24E-21 | CASKIN2     |
| ENSG00000110880 | 1522.729815 | 5349.439108 | -1.812789572 | 3.10E-23 | 1.28E-21 | CORO1C      |
| ENSG00000140451 | 26.2001517  | 387.8367706 | -3.890659743 | 3.21E-23 | 1.32E-21 | PIF1        |
| ENSG00000146592 | 683.9741244 | 28.24652038 | 4.600679895  | 3.21E-23 | 1.32E-21 | CREB5       |
| ENSG00000145362 | 1531.703296 | 76.46903324 | 4.320822232  | 3.22E-23 | 1.33E-21 | ANK2        |
| ENSG00000169313 | 1089.791172 | 0           | 12.42361728  | 3.31E-23 | 1.36E-21 | P2RY12      |
| ENSG00000074047 | 49.39977027 | 632.4970236 | -3.680251728 | 3.37E-23 | 1.38E-21 | GLI2        |
| ENSG00000172243 | 1136.60307  | 0           | 12.48426253  | 3.40E-23 | 1.39E-21 | CLEC7A      |
| ENSG00000110693 | 776.7379103 | 4.198191768 | 7.513466401  | 3.44E-23 | 1.41E-21 | SOX6        |
| ENSG00000158106 | 653.6086673 | 20.38400567 | 4.99529195   | 3.59E-23 | 1.47E-21 | RHPN1       |
| ENSG00000215386 | 1184.736954 | 19.02049705 | 5.950280379  | 3.73E-23 | 1.52E-21 | MIR99AHG    |
| ENSG00000169896 | 916.3379394 | 0           | 12.1734235   | 4.01E-23 | 1.63E-21 | ITGAM       |
| ENSG00000184602 | 2483.603484 | 255.4359078 | 3.280330428  | 4.07E-23 | 1.65E-21 | SNN         |
| ENSG00000104884 | 308.2372528 | 1611.830793 | -2.386815372 | 4.10E-23 | 1.66E-21 | ERCC2       |
| ENSG00000144554 | 87.8201901  | 605.924856  | -2.786748018 | 4.14E-23 | 1.68E-21 | FANCD2      |
| ENSG00000235501 | 304.111083  | 21.61533135 | 3.807473834  | 4.28E-23 | 1.73E-21 | AC105942.1  |
| ENSG00000188404 | 443.6787492 | 1.345879667 | 8.284811798  | 4.79E-23 | 1.93E-21 | SELL        |
| ENSG00000034152 | 578.8999753 | 2503.813492 | -2.112586794 | 4.98E-23 | 2.01E-21 | MAP2K3      |
| ENSG00000181631 | 926.1892752 | 0           | 12.18891898  | 5.42E-23 | 2.18E-21 | P2RY13      |
| ENSG00000198597 | 1090.751143 | 0           | 12.42490186  | 5.60E-23 | 2.25E-21 | ZNF536      |
| ENSG00000154920 | 23.81987786 | 222.0034304 | -3.218239598 | 5.79E-23 | 2.32E-21 | EME1        |
| ENSG00000134910 | 1588.139091 | 5545.80514  | -1.804040064 | 6.06E-23 | 2.43E-21 | STT3A       |
| ENSG00000159167 | 160.784891  | 21057.28663 | -7.032998004 | 6.43E-23 | 2.58E-21 | STC1        |
| ENSG00000102003 | 360.9300301 | 17.41713958 | 4.368315563  | 6.46E-23 | 2.58E-21 | SYP         |
| ENSG00000168615 | 390.8136247 | 5688.683134 | -3.863776365 | 7.13E-23 | 2.84E-21 | ADAM9       |
| ENSG00000242173 | 179.2815157 | 4.637318915 | 5.266563421  | 7.68E-23 | 3.06E-21 | ARHGDI3     |
| ENSG00000155659 | 774.9418768 | 0           | 11.93164907  | 7.77E-23 | 3.09E-21 | VSIG4       |
| ENSG00000108829 | 1023.367784 | 5506.354342 | -2.427885813 | 8.19E-23 | 3.25E-21 | LRRC59      |
| ENSG00000181449 | 1571.484334 | 0           | 12.95167178  | 8.19E-23 | 3.25E-21 | SOX2        |
| ENSG00000177602 | 2.44546393  | 163.0570193 | -6.07059128  | 8.99E-23 | 3.56E-21 | HASPIN      |
| ENSG00000109846 | 24447.46982 | 399.6075924 | 5.934404026  | 9.63E-23 | 3.80E-21 | CRYAB       |
| ENSG00000128594 | 719.984738  | 12.57681796 | 5.82778633   | 9.63E-23 | 3.80E-21 | LRRC4       |
| ENSG00000185164 | 117.1274354 | 1098.394567 | -3.229105368 | 9.86E-23 | 3.89E-21 | NOMO2       |
| ENSG00000067057 | 542.584166  | 6412.19483  | -3.563001881 | 9.92E-23 | 3.91E-21 | PFKP        |
| ENSG00000114867 | 3921.296534 | 13347.68139 | -1.767188547 | 1.05E-22 | 4.14E-21 | EIF4G1      |
| ENSG00000172349 | 879.215204  | 7.102282028 | 6.97223988   | 1.10E-22 | 4.32E-21 | IL16        |

|                 |             |             |              |          |          |            |
|-----------------|-------------|-------------|--------------|----------|----------|------------|
| ENSG00000005486 | 1854.562344 | 546.5011061 | 1.762629868  | 1.15E-22 | 4.50E-21 | RHBDD2     |
| ENSG00000145390 | 5152.381998 | 370.597988  | 3.796540662  | 1.22E-22 | 4.79E-21 | USP53      |
| ENSG00000177807 | 1083.375843 | 0           | 12.41506728  | 1.32E-22 | 5.15E-21 | KCNJ10     |
| ENSG00000177575 | 781.9226137 | 9.038385    | 6.457280042  | 1.37E-22 | 5.34E-21 | CD163      |
| ENSG00000155926 | 555.9432497 | 16.32732506 | 5.094371472  | 1.51E-22 | 5.90E-21 | SLA        |
| ENSG00000262223 | 174.7018074 | 4.168666062 | 5.35410742   | 1.66E-22 | 6.46E-21 | AC110285.1 |
| ENSG00000101144 | 1413.688164 | 0.774441189 | 10.93299681  | 1.72E-22 | 6.69E-21 | BMP7       |
| ENSG00000184838 | 16.53774932 | 585.6892621 | -5.144166511 | 1.82E-22 | 7.06E-21 | PRR16      |
| ENSG00000135424 | 3513.702973 | 96.16709362 | 5.189301419  | 1.85E-22 | 7.14E-21 | ITGA7      |
| ENSG00000280010 | 1289.303188 | 3.953766596 | 8.349821765  | 1.87E-22 | 7.22E-21 | AP001350.2 |
| ENSG00000120708 | 4269.982144 | 120233.0199 | -4.815476419 | 1.92E-22 | 7.41E-21 | TGFBI      |
| ENSG00000122952 | 103.0903826 | 1252.875997 | -3.602914938 | 1.92E-22 | 7.41E-21 | ZWINT      |
| ENSG00000134013 | 487.3620596 | 17983.91543 | -5.205647868 | 1.95E-22 | 7.52E-21 | LOXL2      |
| ENSG00000101265 | 1485.879556 | 1.682349583 | 9.730422813  | 2.17E-22 | 8.34E-21 | RASSF2     |
| ENSG00000115677 | 5268.369521 | 22485.08825 | -2.093542437 | 2.23E-22 | 8.55E-21 | HDLBP      |
| ENSG00000187796 | 481.159742  | 39.17886238 | 3.612494026  | 2.26E-22 | 8.65E-21 | CARD9      |
| ENSG00000138964 | 787.2074615 | 0           | 11.95434228  | 2.28E-22 | 8.72E-21 | PARVG      |
| novel.613       | 213.6952748 | 23.21612028 | 3.199201673  | 2.40E-22 | 9.17E-21 | -          |
| ENSG00000124374 | 374.854994  | 38.41716985 | 3.290624334  | 2.58E-22 | 9.83E-21 | PAIP2B     |
| ENSG00000183230 | 1061.023273 | 0           | 12.38492651  | 2.73E-22 | 1.04E-20 | CTNNA3     |
| ENSG00000211448 | 1430.398301 | 12.63818112 | 6.815562309  | 2.76E-22 | 1.05E-20 | DIO2       |
| ENSG00000131095 | 471.6352403 | 4.800183434 | 6.639610065  | 2.80E-22 | 1.06E-20 | GFAP       |
| ENSG00000164764 | 4435.311527 | 37.97731919 | 6.863398215  | 2.83E-22 | 1.07E-20 | SBSPON     |
| ENSG00000223802 | 579.5415192 | 22.91722002 | 4.671096548  | 2.91E-22 | 1.10E-20 | CERS1      |
| ENSG00000179750 | 6.261355894 | 335.3873578 | -5.733756888 | 2.97E-22 | 1.12E-20 | APOBEC3B   |
| ENSG00000162062 | 19.13429254 | 283.9203508 | -3.893261985 | 3.03E-22 | 1.14E-20 | TEDC2      |
| ENSG00000072163 | 2921.874762 | 42.08808972 | 6.112387469  | 3.23E-22 | 1.22E-20 | LIMS2      |
| ENSG00000043462 | 766.4756435 | 0           | 11.91579012  | 3.27E-22 | 1.23E-20 | LCP2       |
| ENSG00000100304 | 504.9070939 | 2158.619299 | -2.096045166 | 3.82E-22 | 1.44E-20 | TTLL12     |
| ENSG00000168675 | 358.4760152 | 2.120320855 | 7.384954973  | 3.84E-22 | 1.44E-20 | LDLRAD4    |
| ENSG00000117593 | 205.0547562 | 882.7893428 | -2.106137034 | 3.86E-22 | 1.45E-20 | DARS2      |
| ENSG00000033327 | 861.3540297 | 206.5686494 | 2.05936575   | 3.96E-22 | 1.48E-20 | GAB2       |
| ENSG00000157927 | 542.888536  | 35.59109141 | 3.925160073  | 4.44E-22 | 1.66E-20 | RADIL      |
| ENSG00000087253 | 2472.543391 | 267.0190059 | 3.211975042  | 4.51E-22 | 1.68E-20 | LPCAT2     |
| ENSG00000039068 | 2412.97522  | 0.356539013 | 12.608517    | 4.52E-22 | 1.68E-20 | CDH1       |
| ENSG00000169242 | 238.4708774 | 17.66156476 | 3.744650805  | 4.66E-22 | 1.73E-20 | EFNA1      |
| ENSG00000188522 | 38.85040819 | 942.8337882 | -4.602992731 | 4.83E-22 | 1.79E-20 | FAM83G     |
| ENSG00000181754 | 378.9927748 | 50.48519677 | 2.907030111  | 4.85E-22 | 1.80E-20 | AMIGO1     |
| ENSG00000121211 | 9.611757884 | 206.2143409 | -4.418038976 | 5.03E-22 | 1.87E-20 | MND1       |
| ENSG00000066294 | 639.3571508 | 0           | 11.65424328  | 5.55E-22 | 2.05E-20 | CD84       |
| ENSG00000166927 | 796.199288  | 0           | 11.9707349   | 5.58E-22 | 2.06E-20 | MS4A7      |
| ENSG00000112902 | 5429.503323 | 213.4131028 | 4.670219854  | 5.73E-22 | 2.12E-20 | SEMA5A     |
| ENSG00000185862 | 796.5584571 | 21.73104121 | 5.188699056  | 6.62E-22 | 2.44E-20 | EVI2B      |
| ENSG00000126860 | 472.3315158 | 14.33803126 | 5.053050959  | 6.62E-22 | 2.44E-20 | EVI2A      |
| ENSG00000162711 | 403.6857781 | 1.487519214 | 8.127000546  | 7.11E-22 | 2.61E-20 | NLRP3      |
| ENSG00000167363 | 931.3786469 | 91.95973639 | 3.342718672  | 7.54E-22 | 2.77E-20 | FN3K       |
| ENSG00000214222 | 158.7600708 | 854.2944632 | -2.427540294 | 7.56E-22 | 2.77E-20 | TUBBP2     |
| ENSG00000084710 | 513.7131787 | 24.64240473 | 4.374336365  | 7.60E-22 | 2.78E-20 | EFR3B      |
| ENSG00000187164 | 1281.292549 | 76.56912193 | 4.062774903  | 8.01E-22 | 2.93E-20 | SHTN1      |
| ENSG00000133574 | 921.2140495 | 0           | 12.18106993  | 8.62E-22 | 3.15E-20 | GIMAP4     |
| ENSG00000107937 | 543.3562333 | 2276.182215 | -2.066759708 | 8.73E-22 | 3.18E-20 | GTPBP4     |

|                 |             |             |              |          |          |            |
|-----------------|-------------|-------------|--------------|----------|----------|------------|
| ENSG00000167723 | 593.7495262 | 20.59646499 | 4.845555302  | 8.85E-22 | 3.22E-20 | TRPV3      |
| ENSG00000188783 | 1826.895098 | 2.92428775  | 9.298188349  | 9.73E-22 | 3.53E-20 | PRELP      |
| ENSG00000109062 | 1089.031567 | 160.7918953 | 2.75806422   | 9.95E-22 | 3.61E-20 | SLC9A3R1   |
| ENSG00000259417 | 1068.856373 | 0.693008929 | 10.54384565  | 1.04E-21 | 3.78E-20 | CTXND1     |
| ENSG00000174672 | 387.9621235 | 5.565296406 | 6.101059858  | 1.15E-21 | 4.15E-20 | BRSK2      |
| ENSG00000124225 | 2390.749985 | 406.6736321 | 2.556010995  | 1.17E-21 | 4.21E-20 | PMEPA1     |
| ENSG00000144230 | 225.6733739 | 1.733100261 | 6.980580166  | 1.21E-21 | 4.38E-20 | GPR17      |
| ENSG00000167106 | 4191.622464 | 406.0003071 | 3.368400684  | 1.23E-21 | 4.42E-20 | FAM102A    |
| ENSG00000089154 | 1440.684907 | 5013.552891 | -1.799042174 | 1.27E-21 | 4.55E-20 | GCN1       |
| ENSG00000213186 | 31.36411949 | 502.5584866 | -4.004237107 | 1.41E-21 | 5.06E-20 | TRIM59     |
| ENSG00000073792 | 578.6450838 | 2525.970863 | -2.126220615 | 1.50E-21 | 5.39E-20 | IGF2BP2    |
| ENSG00000197629 | 1140.995536 | 0           | 12.4897796   | 1.65E-21 | 5.90E-20 | MPEG1      |
| ENSG00000073849 | 1546.620567 | 153.2586928 | 3.336903194  | 1.67E-21 | 5.98E-20 | ST6GAL1    |
| ENSG00000230490 | 187.1701847 | 2.211209725 | 6.43659482   | 1.68E-21 | 6.00E-20 | AL139383.1 |
| ENSG00000205744 | 216.8911919 | 3.250145181 | 6.066280519  | 1.76E-21 | 6.26E-20 | DENND1C    |
| ENSG00000090382 | 1069.145347 | 0           | 12.39594019  | 1.76E-21 | 6.26E-20 | LYZ        |
| ENSG00000116991 | 3298.598651 | 247.0948041 | 3.738291415  | 1.91E-21 | 6.79E-20 | SIPA1L2    |
| ENSG00000163644 | 2233.832153 | 450.5197715 | 2.309994578  | 1.93E-21 | 6.85E-20 | PPM1K      |
| ENSG00000078687 | 786.4743623 | 81.72353262 | 3.264548317  | 1.94E-21 | 6.87E-20 | TNRC6C     |
| ENSG00000160862 | 881.846854  | 5.298361994 | 7.408000183  | 2.03E-21 | 7.21E-20 | AZGP1      |
| ENSG00000142731 | 38.77419217 | 429.3149403 | -3.466786625 | 2.10E-21 | 7.43E-20 | PLK4       |
| ENSG00000138182 | 130.6439094 | 874.815917  | -2.743850245 | 2.20E-21 | 7.78E-20 | KIF20B     |
| ENSG00000133107 | 11.67071206 | 285.5745745 | -4.606375398 | 2.52E-21 | 8.88E-20 | TRPC4      |
| ENSG00000198363 | 1979.419532 | 9040.69068  | -2.191348088 | 2.58E-21 | 9.08E-20 | ASPH       |
| ENSG00000166803 | 10.49273408 | 332.9816217 | -4.983463946 | 2.59E-21 | 9.13E-20 | PCLAF      |
| ENSG00000136731 | 1096.526447 | 3613.060109 | -1.720275681 | 2.80E-21 | 9.86E-20 | UGGT1      |
| ENSG00000145819 | 522.8570255 | 66.22602293 | 2.976922044  | 2.86E-21 | 1.00E-19 | ARHGAP26   |
| ENSG00000151490 | 249.7498799 | 11.83061821 | 4.398764273  | 2.88E-21 | 1.01E-19 | PTPRO      |
| ENSG00000171943 | 1685.169632 | 329.3612301 | 2.355643266  | 2.99E-21 | 1.05E-19 | SRGAP2C    |
| ENSG00000183307 | 193.2771986 | 3.912472529 | 5.616703192  | 3.31E-21 | 1.16E-19 | TMEM121B   |
| ENSG00000124207 | 866.5250921 | 3757.596637 | -2.116614342 | 3.33E-21 | 1.16E-19 | CSE1L      |
| ENSG00000146918 | 219.4457678 | 1628.733665 | -2.891389792 | 3.33E-21 | 1.16E-19 | NCAPG2     |
| ENSG00000152078 | 320.3922328 | 8.875648876 | 5.166712351  | 3.39E-21 | 1.18E-19 | TMEM56     |
| ENSG00000150722 | 545.4448176 | 8.032699664 | 6.071140742  | 3.42E-21 | 1.19E-19 | PPP1R1C    |
| ENSG00000273079 | 613.2281445 | 0           | 11.59410129  | 3.63E-21 | 1.26E-19 | GRIN2B     |
| ENSG00000163154 | 295.2376256 | 1.386017859 | 7.689622688  | 3.67E-21 | 1.27E-19 | TNFaip8L2  |
| ENSG00000086300 | 241.9063423 | 3.485113743 | 6.087772941  | 4.00E-21 | 1.39E-19 | SNX10      |
| ENSG00000168216 | 1797.276954 | 495.6565791 | 1.85882892   | 4.07E-21 | 1.41E-19 | LMBRD1     |
| ENSG00000080986 | 56.08427682 | 946.644224  | -4.078426897 | 4.15E-21 | 1.43E-19 | NDC80      |
| ENSG00000104324 | 1525.527371 | 440.8628405 | 1.790645401  | 4.26E-21 | 1.47E-19 | CPQ        |
| ENSG00000010278 | 10459.43113 | 874.6719916 | 3.579616589  | 4.81E-21 | 1.66E-19 | CD9        |
| ENSG00000137563 | 150.9652399 | 1603.647078 | -3.409504203 | 4.89E-21 | 1.68E-19 | GGH        |
| ENSG00000105967 | 521.2139688 | 1.080229524 | 8.91844577   | 5.38E-21 | 1.85E-19 | TFEC       |
| ENSG00000180353 | 1774.790516 | 270.6239863 | 2.713528401  | 5.43E-21 | 1.86E-19 | HCLS1      |
| ENSG00000147257 | 3551.221151 | 0.672939833 | 12.29417942  | 5.68E-21 | 1.95E-19 | GPC3       |
| ENSG00000123901 | 1094.077138 | 0.336469917 | 11.46748225  | 6.06E-21 | 2.08E-19 | GPR83      |
| ENSG00000240583 | 4213.08646  | 6.218167144 | 9.392359486  | 6.51E-21 | 2.23E-19 | AQP1       |
| ENSG00000189067 | 4465.88227  | 498.7176517 | 3.162094041  | 6.63E-21 | 2.27E-19 | LITAF      |
| ENSG00000137692 | 293.3076558 | 1321.521905 | -2.172044396 | 7.15E-21 | 2.44E-19 | DCUN1D5    |
| ENSG00000163563 | 810.3306751 | 0           | 11.99603835  | 7.45E-21 | 2.54E-19 | MNDA       |
| ENSG00000274956 | 738.7796328 | 0           | 11.86282763  | 8.08E-21 | 2.75E-19 | NKAIN3-IT1 |

|                 |             |             |              |          |          |            |
|-----------------|-------------|-------------|--------------|----------|----------|------------|
| ENSG00000114013 | 625.4191908 | 0           | 11.62234507  | 8.14E-21 | 2.76E-19 | CD86       |
| ENSG00000139354 | 4475.638444 | 322.0292918 | 3.796264706  | 8.73E-21 | 2.96E-19 | GAS2L3     |
| ENSG00000183111 | 1824.410306 | 36.32308265 | 5.647675318  | 9.17E-21 | 3.11E-19 | ARHGEF37   |
| ENSG00000065911 | 340.7820001 | 1867.81988  | -2.454790092 | 9.29E-21 | 3.14E-19 | MTHFD2     |
| ENSG00000110934 | 516.8112551 | 0           | 11.34716912  | 9.59E-21 | 3.24E-19 | BIN2       |
| ENSG00000079616 | 311.5044585 | 1411.932164 | -2.180436725 | 9.65E-21 | 3.26E-19 | KIF22      |
| ENSG00000066279 | 18.69087005 | 1433.953474 | -6.25749572  | 1.03E-20 | 3.46E-19 | ASPM       |
| ENSG00000157193 | 70.67317994 | 373.8257399 | -2.402064013 | 1.05E-20 | 3.54E-19 | LRP8       |
| ENSG00000196405 | 1916.534144 | 407.505678  | 2.234215469  | 1.12E-20 | 3.76E-19 | EVL        |
| ENSG00000114853 | 2326.715399 | 605.4979168 | 1.942215763  | 1.14E-20 | 3.83E-19 | ZBTB47     |
| ENSG00000123636 | 844.1888987 | 222.2301795 | 1.925181359  | 1.28E-20 | 4.29E-19 | BAZ2B      |
| ENSG00000185624 | 4871.541973 | 26227.67474 | -2.428647664 | 1.29E-20 | 4.32E-19 | P4HB       |
| ENSG00000095752 | 31.819509   | 1454.296159 | -5.514276544 | 1.33E-20 | 4.44E-19 | IL11       |
| ENSG00000157064 | 41.54466544 | 284.4800549 | -2.776734537 | 1.42E-20 | 4.74E-19 | NMNAT2     |
| ENSG00000064999 | 1829.734385 | 514.7743051 | 1.829395915  | 1.45E-20 | 4.85E-19 | ANKS1A     |
| ENSG00000143772 | 1337.248397 | 136.4245501 | 3.292397889  | 1.49E-20 | 4.96E-19 | ITPKB      |
| ENSG00000131462 | 391.214696  | 1709.016521 | -2.127230456 | 1.58E-20 | 5.27E-19 | TUBG1      |
| ENSG00000156802 | 212.4431883 | 1291.735641 | -2.60457365  | 1.76E-20 | 5.83E-19 | ATAD2      |
| ENSG00000148344 | 75.20366742 | 5948.218943 | -6.306206239 | 1.89E-20 | 6.28E-19 | PTGES      |
| ENSG00000161929 | 180.3967397 | 3.923085015 | 5.51628567   | 1.91E-20 | 6.34E-19 | SCIMP      |
| ENSG00000145675 | 3640.943806 | 507.1452648 | 2.84344563   | 2.06E-20 | 6.81E-19 | PIK3R1     |
| ENSG00000145623 | 707.3139504 | 5599.18218  | -2.984673814 | 2.12E-20 | 6.99E-19 | OSMR       |
| ENSG00000189159 | 322.1773474 | 2990.605945 | -3.214739807 | 2.29E-20 | 7.55E-19 | JPT1       |
| ENSG00000072041 | 0.293240848 | 864.1158216 | -11.37423918 | 2.40E-20 | 7.91E-19 | SLC6A15    |
| ENSG00000156261 | 1557.824065 | 5256.503681 | -1.75460665  | 2.56E-20 | 8.42E-19 | CCT8       |
| ENSG00000127564 | 20.885931   | 850.5707765 | -5.344517669 | 2.66E-20 | 8.74E-19 | PKMYT1     |
| ENSG00000121966 | 1374.245803 | 0.387220594 | 11.79632873  | 2.69E-20 | 8.84E-19 | CXCR4      |
| ENSG00000134504 | 1181.500363 | 231.9425318 | 2.349140705  | 2.69E-20 | 8.84E-19 | KCTD1      |
| ENSG00000069122 | 1407.529403 | 1.426156051 | 9.939803877  | 2.83E-20 | 9.26E-19 | ADGRF5     |
| ENSG00000240038 | 552.6199336 | 39.91876918 | 3.79463041   | 3.00E-20 | 9.82E-19 | AMY2B      |
| ENSG00000071246 | 1644.109311 | 279.4585507 | 2.556753978  | 3.28E-20 | 1.07E-18 | VASH1      |
| ENSG00000196664 | 628.8891025 | 0           | 11.6303112   | 3.31E-20 | 1.08E-18 | TLR7       |
| ENSG00000235314 | 200.5896288 | 9.448243229 | 4.389111775  | 3.32E-20 | 1.08E-18 | LINC00957  |
| ENSG00000196305 | 1118.792266 | 4352.066199 | -1.959809235 | 3.53E-20 | 1.15E-18 | IARS       |
| ENSG00000111058 | 769.4844269 | 205.6040013 | 1.903605325  | 3.75E-20 | 1.22E-18 | ACSS3      |
| ENSG00000120963 | 2440.741344 | 715.1891046 | 1.770992301  | 3.85E-20 | 1.25E-18 | ZNF706     |
| ENSG00000146090 | 974.7125915 | 0.713078025 | 10.40784863  | 3.90E-20 | 1.27E-18 | RASGEF1C   |
| ENSG00000143375 | 166.4020543 | 3.210006989 | 5.688810826  | 4.03E-20 | 1.30E-18 | CGN        |
| ENSG00000186466 | 444.4554628 | 2.649180997 | 7.437473086  | 4.28E-20 | 1.39E-18 | AQP7P1     |
| ENSG00000182287 | 5703.165969 | 477.8022733 | 3.577731921  | 4.34E-20 | 1.40E-18 | AP1S2      |
| ENSG00000044090 | 542.7837555 | 1974.15184  | -1.862625098 | 4.39E-20 | 1.42E-18 | CUL7       |
| ENSG00000272168 | 167.559831  | 6.807234573 | 4.619499728  | 4.52E-20 | 1.46E-18 | CASC15     |
| ENSG00000124882 | 1.50778846  | 2095.954765 | -10.4381398  | 5.02E-20 | 1.62E-18 | EREG       |
| ENSG00000167912 | 371.6465992 | 2.782648203 | 7.033393051  | 5.06E-20 | 1.63E-18 | AC090152.1 |
| ENSG00000155792 | 277.048503  | 15.14341082 | 4.182563566  | 5.08E-20 | 1.63E-18 | DEPTOR     |
| ENSG00000118137 | 162.6583048 | 3.973835692 | 5.361796118  | 5.33E-20 | 1.71E-18 | APOA1      |
| ENSG00000136811 | 481.0258582 | 1596.979136 | -1.731223035 | 5.37E-20 | 1.72E-18 | ODF2       |
| ENSG00000127586 | 253.7982395 | 994.6719283 | -1.970355573 | 6.04E-20 | 1.93E-18 | CHTF18     |
| ENSG00000197959 | 271.3253494 | 12.72662985 | 4.421677354  | 6.12E-20 | 1.96E-18 | DNM3       |
| ENSG00000144893 | 391.9911924 | 1.029478846 | 8.514975594  | 6.30E-20 | 2.01E-18 | MED12L     |
| ENSG00000189319 | 1977.383832 | 366.7702401 | 2.430042008  | 7.20E-20 | 2.29E-18 | FAM53B     |



|                 |             |             |              |          |          |           |
|-----------------|-------------|-------------|--------------|----------|----------|-----------|
| ENSG00000183207 | 821.5442495 | 3744.541189 | -2.188424304 | 7.43E-20 | 2.37E-18 | RUVBL2    |
| ENSG00000112799 | 609.0168922 | 0           | 11.58398695  | 7.50E-20 | 2.39E-18 | LY86      |
| ENSG00000153303 | 1037.255009 | 0           | 12.35234965  | 8.14E-20 | 2.58E-18 | FRMD1     |
| ENSG00000101605 | 176.0324031 | 17.9967504  | 3.291809582  | 8.17E-20 | 2.59E-18 | MYOM1     |
| ENSG00000139514 | 407.9997288 | 2705.818384 | -2.729396791 | 8.30E-20 | 2.63E-18 | SLC7A1    |
| ENSG00000105997 | 1.509042109 | 195.5791482 | -7.015188695 | 8.62E-20 | 2.73E-18 | HOXA3     |
| ENSG00000167895 | 621.0183979 | 0           | 11.61218062  | 9.04E-20 | 2.86E-18 | TMC8      |
| ENSG00000198223 | 727.9429641 | 0.672939833 | 9.992492837  | 9.07E-20 | 2.86E-18 | CSF2RA    |
| ENSG00000111424 | 13.79395868 | 215.8816275 | -3.962357219 | 9.28E-20 | 2.93E-18 | VDR       |
| ENSG00000146192 | 501.9369884 | 0           | 11.30499919  | 9.57E-20 | 3.01E-18 | FGD2      |
| ENSG00000140650 | 64.18398675 | 379.7076939 | -2.564629296 | 1.04E-19 | 3.28E-18 | PMM2      |
| ENSG00000089057 | 1769.201735 | 528.914248  | 1.74190498   | 1.07E-19 | 3.37E-18 | SLC23A2   |
| ENSG00000242125 | 189.2786014 | 1101.983613 | -2.541576075 | 1.08E-19 | 3.38E-18 | SNHG3     |
| ENSG00000107719 | 1735.578272 | 18.26496909 | 6.561467663  | 1.12E-19 | 3.51E-18 | PALD1     |
| ENSG00000129810 | 10.83633469 | 166.9601636 | -3.941993966 | 1.13E-19 | 3.53E-18 | SGO1      |
| ENSG00000008394 | 64.20622425 | 5720.935078 | -6.478180383 | 1.18E-19 | 3.68E-18 | MGST1     |
| ENSG00000150275 | 949.3351173 | 0.356539013 | 11.26273835  | 1.18E-19 | 3.69E-18 | PCDH15    |
| ENSG00000062822 | 311.1000695 | 1273.504472 | -2.033331019 | 1.22E-19 | 3.81E-18 | POLD1     |
| ENSG00000159388 | 6061.764344 | 226.4716859 | 4.741732135  | 1.22E-19 | 3.81E-18 | BTG2      |
| ENSG00000166825 | 111.2248227 | 19966.6042  | -7.488302758 | 1.34E-19 | 4.16E-18 | ANPEP     |
| novel.383       | 669.6261526 | 1.426156051 | 8.867504713  | 1.35E-19 | 4.21E-18 | -         |
| ENSG00000110848 | 454.966499  | 0           | 11.16328687  | 1.38E-19 | 4.28E-18 | CD69      |
| ENSG00000261455 | 251.7339426 | 30.56051573 | 3.042815967  | 1.38E-19 | 4.28E-18 | LINC01003 |
| ENSG00000177570 | 248.859088  | 4.93365064  | 5.641982566  | 1.40E-19 | 4.33E-18 | SAMD12    |
| ENSG00000174059 | 968.4786782 | 5.514545729 | 7.436694817  | 1.41E-19 | 4.37E-18 | CD34      |
| ENSG00000100060 | 327.6170046 | 1.060160428 | 8.251279748  | 1.45E-19 | 4.49E-18 | MFNG      |
| ENSG00000225697 | 256.7034947 | 1646.32609  | -2.6808608   | 1.56E-19 | 4.82E-18 | SLC26A6   |
| ENSG00000128815 | 447.7433204 | 0           | 11.14015187  | 1.57E-19 | 4.85E-18 | WDFY4     |
| ENSG00000138593 | 6525.330186 | 912.6601757 | 2.837835647  | 1.62E-19 | 4.98E-18 | SECISBP2L |
| ENSG00000175928 | 420.6785056 | 0           | 11.05038628  | 1.77E-19 | 5.44E-18 | LRRN1     |
| ENSG00000010292 | 627.2128133 | 3128.445576 | -2.318583055 | 1.77E-19 | 5.44E-18 | NCAPD2    |
| ENSG00000186994 | 311.847758  | 7.398742147 | 5.38520207   | 1.84E-19 | 5.66E-18 | KANK3     |
| ENSG00000143333 | 483.6347115 | 13.31112096 | 5.173029766  | 1.87E-19 | 5.73E-18 | RGS16     |
| ENSG00000138675 | 0.616711807 | 529.1539813 | -9.770083959 | 1.93E-19 | 5.92E-18 | FGF5      |
| ENSG00000245526 | 681.6086816 | 0           | 11.74662613  | 1.96E-19 | 5.99E-18 | LINC00461 |
| ENSG00000167325 | 437.0103555 | 2587.483147 | -2.566076959 | 2.27E-19 | 6.92E-18 | RRM1      |
| ENSG00000198846 | 1021.596593 | 6.473204801 | 7.279512202  | 2.37E-19 | 7.23E-18 | TOX       |
| ENSG00000157570 | 396.9963271 | 1.753169357 | 7.798881083  | 2.44E-19 | 7.43E-18 | TSPAN18   |
| ENSG00000158164 | 5.117368968 | 115.0263016 | -4.485135394 | 2.48E-19 | 7.55E-18 | TMSB15A   |
| ENSG00000143409 | 1022.204626 | 105.0260938 | 3.280186203  | 2.49E-19 | 7.56E-18 | MINDY1    |
| ENSG00000115271 | 504.312905  | 76.64109758 | 2.714915496  | 2.58E-19 | 7.82E-18 | GCA       |
| ENSG00000125319 | 25.05964099 | 223.3451533 | -3.153674785 | 2.63E-19 | 7.97E-18 | C17orf53  |
| ENSG00000163468 | 2220.893536 | 8231.629684 | -1.890089099 | 2.65E-19 | 8.01E-18 | CCT3      |
| ENSG00000188501 | 250.380255  | 16.49849031 | 3.935634784  | 2.67E-19 | 8.06E-18 | LCTL      |
| ENSG00000261115 | 299.3462599 | 1.049547942 | 8.121691891  | 2.74E-19 | 8.28E-18 | TMEM178B  |
| ENSG00000180198 | 208.3456947 | 1502.306873 | -2.850572451 | 2.78E-19 | 8.40E-18 | RCC1      |
| ENSG00000205517 | 341.2888211 | 3.903015919 | 6.44131235   | 3.03E-19 | 9.14E-18 | RGL3      |
| ENSG00000121964 | 1411.668183 | 240.4503872 | 2.554599824  | 3.12E-19 | 9.40E-18 | GTDC1     |
| ENSG00000171659 | 763.5833094 | 0.387220594 | 10.9485185   | 3.16E-19 | 9.50E-18 | GPR34     |
| ENSG00000198517 | 3199.432531 | 756.2153044 | 2.08136509   | 3.28E-19 | 9.84E-18 | MAFK      |
| ENSG00000070087 | 1261.745507 | 6038.422489 | -2.258736749 | 3.39E-19 | 1.02E-17 | PFN2      |

|                 |             |             |              |          |          |            |
|-----------------|-------------|-------------|--------------|----------|----------|------------|
| ENSG00000235823 | 709.442739  | 72.81309257 | 3.287469822  | 3.46E-19 | 1.04E-17 | OLMALINC   |
| ENSG00000136492 | 22.48817074 | 310.9834237 | -3.785797858 | 3.53E-19 | 1.06E-17 | BRIP1      |
| ENSG00000197046 | 5.500046503 | 982.3836265 | -7.484272687 | 3.60E-19 | 1.08E-17 | SIGLEC15   |
| ENSG00000196169 | 695.0382596 | 0           | 11.7746153   | 3.67E-19 | 1.09E-17 | KIF19      |
| ENSG00000092758 | 4494.21772  | 93.46741874 | 5.585322644  | 3.70E-19 | 1.10E-17 | COL9A3     |
| ENSG00000154263 | 955.1593097 | 5.218214004 | 7.500526619  | 3.71E-19 | 1.11E-17 | ABCA10     |
| ENSG00000128918 | 279.0240738 | 3.230076085 | 6.432313293  | 3.88E-19 | 1.15E-17 | ALDH1A2    |
| ENSG00000113269 | 3366.716538 | 660.4089794 | 2.349553689  | 3.95E-19 | 1.17E-17 | RNF130     |
| ENSG00000088538 | 337.360097  | 11.40313103 | 4.899672446  | 4.09E-19 | 1.21E-17 | DOCK3      |
| ENSG00000156535 | 86.58747815 | 3092.732375 | -5.159191075 | 4.16E-19 | 1.23E-17 | CD109      |
| ENSG00000121898 | 1031.732949 | 0           | 12.34454892  | 4.45E-19 | 1.32E-17 | CPXM2      |
| ENSG00000164691 | 416.578204  | 0           | 11.03605787  | 4.53E-19 | 1.34E-17 | TAGAP      |
| ENSG00000188976 | 885.6755124 | 3201.235998 | -1.853778307 | 4.64E-19 | 1.37E-17 | NOC2L      |
| ENSG00000185985 | 610.2116001 | 0.693008929 | 9.734871659  | 4.99E-19 | 1.47E-17 | SLITRK2    |
| ENSG00000132326 | 259.1232445 | 38.41961    | 2.754068627  | 5.09E-19 | 1.50E-17 | PER2       |
| ENSG00000167123 | 989.5104759 | 5618.127611 | -2.505382447 | 5.18E-19 | 1.52E-17 | CERCAM     |
| ENSG00000164626 | 538.6203052 | 0           | 11.40695556  | 5.21E-19 | 1.53E-17 | KCNK5      |
| ENSG00000044574 | 5969.09225  | 41054.43689 | -2.78196234  | 5.25E-19 | 1.54E-17 | HSPA5      |
| ENSG00000133561 | 518.4432101 | 0           | 11.35168014  | 5.45E-19 | 1.60E-17 | GIMAP6     |
| ENSG00000057019 | 1328.188935 | 10845.20139 | -3.029489403 | 5.71E-19 | 1.67E-17 | DCBLD2     |
| ENSG00000105851 | 451.6254702 | 0           | 11.15260136  | 5.74E-19 | 1.68E-17 | PIK3CG     |
| ENSG00000165424 | 6633.058322 | 1149.812004 | 2.528017337  | 5.79E-19 | 1.69E-17 | ZCCHC24    |
| ENSG00000115306 | 31138.56704 | 5951.688871 | 2.38728621   | 5.96E-19 | 1.74E-17 | SPTBN1     |
| ENSG00000095203 | 5292.248493 | 109.7729924 | 5.592722882  | 5.97E-19 | 1.74E-17 | EPB41L4B   |
| ENSG00000135636 | 183.7035487 | 8.304210397 | 4.471464755  | 6.14E-19 | 1.79E-17 | DYSF       |
| ENSG00000254986 | 254.5349025 | 1193.83169  | -2.229766759 | 6.15E-19 | 1.79E-17 | DPP3       |
| ENSG00000137558 | 554.0946812 | 0           | 11.44763923  | 6.24E-19 | 1.81E-17 | PI15       |
| ENSG00000148948 | 645.8708489 | 0.713078025 | 9.813963528  | 6.36E-19 | 1.85E-17 | LRRC4C     |
| ENSG00000075702 | 44.94646738 | 492.4785164 | -3.453401993 | 6.55E-19 | 1.90E-17 | WDR62      |
| ENSG00000221955 | 12.09622747 | 145.7047105 | -3.589610669 | 6.59E-19 | 1.91E-17 | SLC12A8    |
| novel.342       | 370.3538376 | 0           | 10.86645927  | 6.76E-19 | 1.96E-17 | -          |
| ENSG00000145912 | 544.5638285 | 1850.659529 | -1.765057916 | 6.94E-19 | 2.01E-17 | NHP2       |
| ENSG00000120915 | 157.1171723 | 7.715142968 | 4.328284244  | 7.06E-19 | 2.04E-17 | EPHX2      |
| ENSG00000113569 | 344.6847936 | 1125.0599   | -1.706589377 | 7.28E-19 | 2.10E-17 | NUP155     |
| ENSG00000105963 | 642.9906813 | 27.91937868 | 4.531777317  | 7.32E-19 | 2.11E-17 | ADAP1      |
| ENSG00000163328 | 2936.665571 | 225.4293515 | 3.704560354  | 7.52E-19 | 2.17E-17 | GPR155     |
| ENSG00000171307 | 363.4164928 | 1197.329167 | -1.71997988  | 8.14E-19 | 2.34E-17 | ZDHHC16    |
| ENSG00000235859 | 259.5130887 | 11.22849815 | 4.535838083  | 8.45E-19 | 2.43E-17 | AC006978.1 |
| ENSG00000244734 | 566.0093555 | 0           | 11.47833503  | 8.92E-19 | 2.56E-17 | HBB        |
| ENSG00000167851 | 389.6976182 | 0           | 10.93983026  | 9.98E-19 | 2.86E-17 | CD300A     |
| ENSG00000181163 | 4224.657823 | 17110.94877 | -2.018047516 | 1.02E-18 | 2.91E-17 | NPM1       |
| ENSG00000122641 | 65.06037527 | 4740.193742 | -6.187480507 | 1.03E-18 | 2.94E-17 | INHBA      |
| ENSG00000135439 | 175.1595183 | 3.647978261 | 5.601143626  | 1.11E-18 | 3.17E-17 | AGAP2      |
| ENSG00000113719 | 2411.707307 | 7223.910245 | -1.582702268 | 1.17E-18 | 3.34E-17 | ERGIC1     |
| ENSG00000198805 | 273.6055441 | 1106.488013 | -2.015999755 | 1.23E-18 | 3.51E-17 | PNP        |
| ENSG00000188643 | 1510.225381 | 5934.131067 | -1.974222194 | 1.25E-18 | 3.55E-17 | S100A16    |
| ENSG00000156711 | 81.32752105 | 520.7867598 | -2.678966854 | 1.25E-18 | 3.56E-17 | MAPK13     |
| ENSG00000114480 | 403.2418295 | 2759.187296 | -2.774446887 | 1.27E-18 | 3.62E-17 | GBE1       |
| ENSG00000125355 | 697.0405109 | 14.54116237 | 5.587295496  | 1.33E-18 | 3.77E-17 | TMEM255A   |
| ENSG00000144115 | 1186.440682 | 22.12142547 | 5.754338015  | 1.38E-18 | 3.91E-17 | THNSL2     |
| ENSG00000068305 | 2145.604491 | 630.6723925 | 1.766627433  | 1.38E-18 | 3.92E-17 | MEF2A      |

|                 |             |             |              |          |          |            |
|-----------------|-------------|-------------|--------------|----------|----------|------------|
| ENSG00000171115 | 482.0756191 | 0           | 11.24674255  | 1.38E-18 | 3.92E-17 | GIMAP8     |
| ENSG00000164318 | 1143.964236 | 154.1366559 | 2.891015523  | 1.40E-18 | 3.96E-17 | EGFLAM     |
| ENSG00000082438 | 1000.429912 | 96.44446495 | 3.371936404  | 1.42E-18 | 4.01E-17 | COBLL1     |
| ENSG00000266094 | 426.6886158 | 25.66217018 | 4.057986484  | 1.48E-18 | 4.17E-17 | RASSF5     |
| ENSG00000104903 | 536.5599931 | 60.03468456 | 3.161742805  | 1.51E-18 | 4.26E-17 | LYL1       |
| ENSG00000180777 | 1189.176791 | 0           | 12.54952724  | 1.54E-18 | 4.35E-17 | ANKRD30B   |
| ENSG00000127399 | 262.789169  | 11.92394722 | 4.448747002  | 1.56E-18 | 4.40E-17 | LRRC61     |
| ENSG00000116396 | 238.643882  | 44.13600256 | 2.43479973   | 1.64E-18 | 4.59E-17 | KCNC4      |
| ENSG00000164684 | 735.4422773 | 14.60393819 | 5.643762903  | 1.66E-18 | 4.65E-17 | ZNF704     |
| ENSG00000138363 | 565.1513184 | 2475.576187 | -2.131268557 | 1.66E-18 | 4.66E-17 | ATIC       |
| ENSG00000103494 | 140.5424261 | 533.22404   | -1.923695728 | 1.86E-18 | 5.22E-17 | RPGRIP1L   |
| ENSG00000130540 | 3.3831394   | 194.9672207 | -5.861565955 | 1.89E-18 | 5.30E-17 | SULT4A1    |
| ENSG00000110324 | 902.8940182 | 0.387220594 | 11.19030386  | 1.91E-18 | 5.33E-17 | IL10RA     |
| ENSG00000117984 | 8773.236899 | 2256.186364 | 1.959234103  | 1.91E-18 | 5.33E-17 | CTSD       |
| ENSG00000242689 | 922.8993135 | 7.327922374 | 6.965104503  | 1.93E-18 | 5.38E-17 | CNTF       |
| ENSG00000112312 | 96.020007   | 732.4908167 | -2.931878671 | 1.94E-18 | 5.39E-17 | GMNN       |
| ENSG00000106537 | 1576.044506 | 199.5444135 | 2.982867069  | 1.95E-18 | 5.43E-17 | TSPAN13    |
| ENSG00000135643 | 2545.370142 | 106.8016784 | 4.576511779  | 2.05E-18 | 5.70E-17 | KCNMB4     |
| ENSG00000141753 | 17521.89691 | 99528.77993 | -2.505957838 | 2.06E-18 | 5.72E-17 | IGFBP4     |
| ENSG00000101336 | 671.779893  | 0.356539013 | 10.76372848  | 2.23E-18 | 6.18E-17 | HCK        |
| ENSG00000154153 | 686.7980464 | 16.93201366 | 5.330474496  | 2.29E-18 | 6.34E-17 | RETREG1    |
| ENSG00000167670 | 207.6255144 | 988.9455652 | -2.2516479   | 2.33E-18 | 6.45E-17 | CHAF1A     |
| ENSG00000162267 | 281.8359037 | 2.406040094 | 6.830703246  | 2.43E-18 | 6.71E-17 | ITIH3      |
| ENSG00000227502 | 732.4580579 | 0.336469917 | 10.88863296  | 2.46E-18 | 6.78E-17 | LINC01268  |
| ENSG00000009790 | 282.9961873 | 4.902969058 | 5.833055453  | 2.53E-18 | 6.97E-17 | TRAF3IP3   |
| ENSG00000253729 | 1612.168143 | 5903.906775 | -1.872698842 | 2.75E-18 | 7.57E-17 | PRKDC      |
| ENSG00000108424 | 2665.147456 | 7974.001564 | -1.581134101 | 2.78E-18 | 7.64E-17 | KPNB1      |
| ENSG00000265415 | 6.404984563 | 140.2014193 | -4.459108407 | 2.88E-18 | 7.91E-17 | AC099850.3 |
| ENSG00000185046 | 158.3696854 | 2.415496705 | 5.989950698  | 2.90E-18 | 7.97E-17 | ANKS1B     |
| ENSG00000074695 | 1530.416132 | 7271.759077 | -2.248366638 | 2.95E-18 | 8.09E-17 | LMAN1      |
| ENSG00000129195 | 17.76365104 | 695.659281  | -5.290124894 | 2.99E-18 | 8.18E-17 | PIMREG     |
| ENSG00000273771 | 252.5461972 | 3.749479616 | 6.110846728  | 3.03E-18 | 8.29E-17 | AC024337.2 |
| ENSG00000166510 | 14.04722496 | 803.6181039 | -5.840582256 | 3.08E-18 | 8.42E-17 | CCDC68     |
| ENSG00000157456 | 51.10674774 | 1205.289882 | -4.558224961 | 3.18E-18 | 8.69E-17 | CCNB2      |
| ENSG00000141968 | 645.3071286 | 0.387220594 | 10.70571483  | 3.38E-18 | 9.22E-17 | VAV1       |
| ENSG00000141524 | 1267.352514 | 24.14666631 | 5.706017305  | 3.51E-18 | 9.57E-17 | TMC6       |
| ENSG00000139438 | 530.5195971 | 24.817166   | 4.409911121  | 3.59E-18 | 9.77E-17 | FAM222A    |
| ENSG00000125912 | 998.3633479 | 3669.615726 | -1.878089828 | 3.77E-18 | 1.02E-16 | NCLN       |
| ENSG00000175216 | 1201.150019 | 3850.851571 | -1.680797415 | 4.09E-18 | 1.11E-16 | CKAP5      |
| ENSG00000142185 | 601.7312753 | 0.356539013 | 10.60487509  | 4.13E-18 | 1.12E-16 | TRPM2      |
| ENSG00000070159 | 37.10543742 | 310.0985725 | -3.061194519 | 4.15E-18 | 1.12E-16 | PTPN3      |
| ENSG00000099901 | 901.0166494 | 3825.581311 | -2.086131634 | 4.34E-18 | 1.18E-16 | RANBP1     |
| ENSG00000158292 | 788.5011062 | 123.9617726 | 2.670567255  | 4.40E-18 | 1.19E-16 | GPR153     |
| ENSG00000113810 | 304.2530579 | 1845.79269  | -2.601110958 | 4.52E-18 | 1.22E-16 | SMC4       |
| ENSG00000123836 | 549.0891755 | 112.6026325 | 2.284941292  | 4.62E-18 | 1.25E-16 | PFKFB2     |
| ENSG00000150337 | 802.7781504 | 0.336469917 | 11.02087133  | 4.64E-18 | 1.25E-16 | FCGR1A     |
| ENSG00000108179 | 360.0709903 | 3136.0461   | -3.122642578 | 4.71E-18 | 1.27E-16 | PPIF       |
| ENSG00000128595 | 4080.754535 | 19071.0617  | -2.224496797 | 4.76E-18 | 1.28E-16 | CALU       |
| ENSG00000239713 | 601.1367735 | 98.83937898 | 2.603264433  | 4.78E-18 | 1.29E-16 | APOBEC3G   |
| ENSG00000087269 | 404.3632511 | 1254.536454 | -1.63350061  | 4.79E-18 | 1.29E-16 | NOP14      |
| ENSG00000185480 | 33.37647485 | 221.6908352 | -2.733151154 | 4.97E-18 | 1.33E-16 | PARBPB     |

|                 |             |             |              |          |          |            |
|-----------------|-------------|-------------|--------------|----------|----------|------------|
| ENSG00000112149 | 1365.9313   | 66.41700049 | 4.362285224  | 5.03E-18 | 1.35E-16 | CD83       |
| ENSG00000265531 | 312.9703071 | 0           | 10.62377318  | 5.18E-18 | 1.39E-16 | FCGR1CP    |
| ENSG00000110079 | 308.9744577 | 0           | 10.60496561  | 5.22E-18 | 1.40E-16 | MS4A4A     |
| ENSG00000170498 | 1.481319294 | 298.7050521 | -7.634372207 | 5.25E-18 | 1.40E-16 | KISS1      |
| ENSG00000102230 | 174.7626671 | 3.088436538 | 5.777372962  | 5.28E-18 | 1.41E-16 | PCYT1B     |
| ENSG00000120526 | 197.1909037 | 944.9626666 | -2.26121793  | 5.29E-18 | 1.41E-16 | NUDCD1     |
| ENSG00000163673 | 1034.852125 | 0           | 12.34890917  | 5.47E-18 | 1.46E-16 | DCLK3      |
| ENSG00000138347 | 0.616711807 | 488.4342552 | -9.653026333 | 5.52E-18 | 1.47E-16 | MYPN       |
| ENSG00000147872 | 281.5122189 | 4029.12697  | -3.839344196 | 5.54E-18 | 1.47E-16 | PLIN2      |
| ENSG00000115504 | 6434.89431  | 1114.62813  | 2.52946814   | 5.76E-18 | 1.53E-16 | EHBP1      |
| ENSG00000155629 | 656.2394812 | 0.356539013 | 10.72993409  | 5.83E-18 | 1.55E-16 | PIK3AP1    |
| ENSG00000111669 | 4162.980873 | 18916.39261 | -2.183946916 | 5.84E-18 | 1.55E-16 | TPI1       |
| ENSG00000120899 | 559.8496338 | 117.3036264 | 2.253869257  | 5.88E-18 | 1.56E-16 | PTK2B      |
| ENSG00000128965 | 13.27051578 | 244.453971  | -4.201968186 | 5.89E-18 | 1.56E-16 | CHAC1      |
| ENSG00000109674 | 2.654282684 | 211.4634933 | -6.293057919 | 5.90E-18 | 1.56E-16 | NEIL3      |
| ENSG00000184292 | 392.997003  | 7.306569008 | 5.758786825  | 6.12E-18 | 1.62E-16 | TACSTD2    |
| ENSG00000163517 | 1507.574748 | 301.4755683 | 2.32296253   | 6.16E-18 | 1.62E-16 | HDAC11     |
| ENSG00000253626 | 81.25054957 | 413.543784  | -2.347944693 | 6.32E-18 | 1.66E-16 | EIF5AL1    |
| ENSG00000211445 | 3308.677339 | 171.2794591 | 4.27090422   | 6.34E-18 | 1.67E-16 | GPX3       |
| ENSG00000111186 | 81.58580157 | 1376.552586 | -4.077491499 | 6.37E-18 | 1.67E-16 | WNT5B      |
| ENSG00000107551 | 5309.58033  | 189.5264828 | 4.809172934  | 6.51E-18 | 1.71E-16 | RASSF4     |
| ENSG00000161835 | 908.2803883 | 79.4569959  | 3.511703604  | 6.76E-18 | 1.77E-16 | GRASP      |
| ENSG00000114554 | 1081.366719 | 3212.674308 | -1.570875812 | 6.87E-18 | 1.80E-16 | PLXNA1     |
| ENSG00000048740 | 3621.367098 | 42.14482938 | 6.421509259  | 6.95E-18 | 1.82E-16 | CELF2      |
| ENSG00000235568 | 249.7468024 | 1.060160428 | 7.859710295  | 7.08E-18 | 1.85E-16 | NFAM1      |
| ENSG00000074706 | 595.7649332 | 1.060160428 | 9.117660316  | 7.11E-18 | 1.86E-16 | IPCEF1     |
| ENSG00000143171 | 565.7004489 | 0.713078025 | 9.622793042  | 7.27E-18 | 1.90E-16 | RXRG       |
| ENSG00000140525 | 147.5470421 | 1008.172357 | -2.772029727 | 7.94E-18 | 2.07E-16 | FANCI      |
| ENSG00000188229 | 2430.164205 | 15829.50636 | -2.70347279  | 8.31E-18 | 2.16E-16 | TUBB4B     |
| ENSG00000180537 | 3.049567979 | 113.4632579 | -5.225727702 | 8.33E-18 | 2.17E-16 | RNF182     |
| ENSG00000144847 | 712.7518144 | 0.336469917 | 10.84925344  | 8.93E-18 | 2.32E-16 | IGSF11     |
| ENSG00000182103 | 647.2479012 | 0.387220594 | 10.71017738  | 9.07E-18 | 2.36E-16 | FAM181B    |
| ENSG00000131504 | 655.779093  | 2415.293772 | -1.881106714 | 9.64E-18 | 2.50E-16 | DIAPH1     |
| ENSG00000175061 | 1286.673969 | 5399.748004 | -2.069324861 | 9.74E-18 | 2.52E-16 | SNHG29     |
| ENSG00000106688 | 62.8442161  | 699.1025743 | -3.477020183 | 9.84E-18 | 2.55E-16 | SLC1A1     |
| ENSG00000182568 | 1529.924348 | 142.2342248 | 3.429096253  | 1.01E-17 | 2.61E-16 | SATB1      |
| ENSG00000256673 | 207.0679658 | 7.267715086 | 4.806447788  | 1.03E-17 | 2.66E-16 | AC141557.1 |
| ENSG00000137801 | 5699.598087 | 41552.89013 | -2.866002058 | 1.04E-17 | 2.68E-16 | THBS1      |
| ENSG00000151690 | 805.4891714 | 117.8447684 | 2.770604482  | 1.04E-17 | 2.68E-16 | MFSD6      |
| ENSG00000188536 | 328.6024769 | 0           | 10.69404939  | 1.04E-17 | 2.68E-16 | HBA2       |
| ENSG00000130024 | 2549.49416  | 744.6806796 | 1.775753394  | 1.08E-17 | 2.78E-16 | PHF10      |
| ENSG00000259668 | 139.3628384 | 11.2603356  | 3.639242086  | 1.11E-17 | 2.86E-16 | AC066613.1 |
| ENSG00000150510 | 195.6858519 | 5.737617535 | 5.091715614  | 1.11E-17 | 2.86E-16 | FAM124A    |
| ENSG00000140280 | 658.4230628 | 131.235605  | 2.327241334  | 1.12E-17 | 2.88E-16 | LYSMD2     |
| ENSG00000157388 | 220.632094  | 1.762625967 | 6.947288181  | 1.12E-17 | 2.88E-16 | CACNA1D    |
| ENSG00000213853 | 2729.167032 | 700.2363673 | 1.962792556  | 1.25E-17 | 3.19E-16 | EMP2       |
| ENSG00000012048 | 131.556911  | 681.4686899 | -2.372681107 | 1.26E-17 | 3.24E-16 | BRCA1      |
| ENSG00000110104 | 246.6562635 | 794.1742368 | -1.687096058 | 1.28E-17 | 3.27E-16 | CCDC86     |
| ENSG00000166130 | 335.0917536 | 2866.309912 | -3.096864584 | 1.39E-17 | 3.56E-16 | IKBIP      |
| ENSG00000010319 | 256.2481768 | 1.00940975  | 7.904133698  | 1.43E-17 | 3.65E-16 | SEMA3G     |
| ENSG00000175857 | 550.0283133 | 0           | 11.43701595  | 1.44E-17 | 3.66E-16 | GAPT       |

|                 |             |             |              |          |          |            |
|-----------------|-------------|-------------|--------------|----------|----------|------------|
| ENSG00000006747 | 681.3466312 | 0.723690511 | 9.88932043   | 1.48E-17 | 3.76E-16 | SCIN       |
| ENSG00000180806 | 0.922560414 | 187.4892765 | -7.688191086 | 1.54E-17 | 3.92E-16 | HOXC9      |
| ENSG00000104894 | 1032.302993 | 48.84871757 | 4.403737756  | 1.60E-17 | 4.06E-16 | CD37       |
| ENSG00000169750 | 80.4869467  | 640.8538303 | -2.993538315 | 1.60E-17 | 4.07E-16 | RAC3       |
| ENSG00000077585 | 1226.898184 | 234.0674761 | 2.39017736   | 1.61E-17 | 4.08E-16 | GPR137B    |
| ENSG00000114757 | 322.1046212 | 5.788368213 | 5.80323081   | 1.65E-17 | 4.19E-16 | PEX5L      |
| ENSG00000243836 | 294.7314209 | 0           | 10.53697965  | 1.69E-17 | 4.27E-16 | WDR86-AS1  |
| ENSG00000197471 | 355.1024065 | 0           | 10.80570304  | 1.71E-17 | 4.33E-16 | SPN        |
| ENSG00000119922 | 3006.206502 | 218.4522956 | 3.781460289  | 1.71E-17 | 4.33E-16 | IFIT2      |
| ENSG00000009335 | 1166.181718 | 3154.236444 | -1.435492013 | 1.73E-17 | 4.37E-16 | UBE3C      |
| ENSG00000265681 | 99.82049917 | 564.3313957 | -2.498695432 | 1.79E-17 | 4.51E-16 | RPL17      |
| ENSG00000065413 | 909.920063  | 89.75764495 | 3.338650937  | 1.81E-17 | 4.55E-16 | ANKRD44    |
| ENSG00000109794 | 332.5327214 | 38.55667322 | 3.103058363  | 1.83E-17 | 4.61E-16 | FAM149A    |
| ENSG00000011105 | 1936.507332 | 669.7472321 | 1.531904976  | 1.95E-17 | 4.90E-16 | TSPAN9     |
| ENSG00000160877 | 828.2388843 | 3341.964856 | -2.012523205 | 1.95E-17 | 4.91E-16 | NACC1      |
| ENSG00000164024 | 397.2327004 | 1246.834013 | -1.650334158 | 1.99E-17 | 4.98E-16 | METAP1     |
| ENSG00000156395 | 433.4249113 | 0           | 11.09349256  | 1.99E-17 | 4.98E-16 | SORCS3     |
| ENSG00000171302 | 547.4692974 | 2098.567672 | -1.938539788 | 2.08E-17 | 5.20E-16 | CANT1      |
| ENSG00000119326 | 7846.597713 | 1003.20436  | 2.96725369   | 2.12E-17 | 5.30E-16 | CTNNAL1    |
| ENSG00000198576 | 237.6862351 | 6.481377142 | 5.199216598  | 2.26E-17 | 5.66E-16 | ARC        |
| ENSG00000197930 | 425.418738  | 3569.675883 | -3.068800971 | 2.30E-17 | 5.75E-16 | ERO1A      |
| ENSG00000198925 | 241.3701212 | 1004.768008 | -2.057392244 | 2.32E-17 | 5.80E-16 | ATG9A      |
| ENSG00000142230 | 936.1357574 | 3606.881354 | -1.946096135 | 2.34E-17 | 5.82E-16 | SAE1       |
| ENSG00000080823 | 203.2977475 | 1002.4125   | -2.30172155  | 2.39E-17 | 5.95E-16 | MOK        |
| ENSG00000148935 | 207.0647034 | 6.931245169 | 4.875821849  | 2.39E-17 | 5.96E-16 | GAS2       |
| ENSG00000140450 | 2508.262525 | 390.5804581 | 2.683760025  | 2.41E-17 | 5.98E-16 | ARRDC4     |
| ENSG00000105383 | 291.571132  | 0           | 10.52128331  | 2.42E-17 | 6.02E-16 | CD33       |
| ENSG00000143870 | 1040.442779 | 7663.475132 | -2.880856586 | 2.43E-17 | 6.02E-16 | PDIA6      |
| ENSG00000123352 | 205.4396841 | 934.2704646 | -2.185565051 | 2.49E-17 | 6.18E-16 | SPATS2     |
| ENSG00000166816 | 283.5117408 | 14.08556214 | 4.322048389  | 2.59E-17 | 6.41E-16 | LDHD       |
| ENSG00000184486 | 410.506408  | 0.774441189 | 9.153117499  | 2.59E-17 | 6.41E-16 | POU3F2     |
| ENSG00000100100 | 2091.489028 | 196.4405314 | 3.413427875  | 2.66E-17 | 6.58E-16 | PIK3IP1    |
| ENSG00000123095 | 1638.305641 | 198.2859551 | 3.047787444  | 2.67E-17 | 6.60E-16 | BHLHE41    |
| ENSG00000183549 | 330.0724431 | 0           | 10.70054011  | 2.69E-17 | 6.64E-16 | ACSM5      |
| novel.215       | 192.6714139 | 20.36136804 | 3.250241215  | 2.70E-17 | 6.65E-16 | -          |
| ENSG00000238018 | 240.4881921 | 10.82236433 | 4.477159551  | 2.70E-17 | 6.66E-16 | AC093110.1 |
| ENSG00000275367 | 133.3963334 | 3.913628404 | 5.082486074  | 2.71E-17 | 6.68E-16 | AC092111.1 |
| ENSG00000163938 | 854.3289722 | 2562.46104  | -1.584690174 | 2.73E-17 | 6.71E-16 | GNL3       |
| ENSG00000179967 | 218.2424595 | 774.002434  | -1.826173226 | 2.99E-17 | 7.35E-16 | PPP1R14BP3 |
| ENSG00000167513 | 38.38406401 | 837.2607514 | -4.445662549 | 3.07E-17 | 7.54E-16 | CDT1       |
| ENSG00000214491 | 313.5574173 | 2.772035718 | 6.791767185  | 3.11E-17 | 7.62E-16 | SEC14L6    |
| ENSG00000175792 | 453.8654928 | 2207.790446 | -2.282502824 | 3.13E-17 | 7.65E-16 | RUVBL1     |
| ENSG00000163814 | 38.56949037 | 7674.886246 | -7.636696084 | 3.60E-17 | 8.80E-16 | CDCP1      |
| ENSG00000072110 | 918.8639755 | 12957.34702 | -3.817852325 | 3.62E-17 | 8.86E-16 | ACTN1      |
| ENSG00000259495 | 228.3231405 | 25.26330961 | 3.171387874  | 3.65E-17 | 8.92E-16 | AC016705.2 |
| ENSG00000135205 | 335.1689548 | 36.14562445 | 3.219335199  | 3.66E-17 | 8.94E-16 | CCDC146    |
| ENSG00000108883 | 949.2181413 | 2711.504602 | -1.514268235 | 3.70E-17 | 9.02E-16 | EFTUD2     |
| ENSG00000119777 | 1137.644699 | 3585.594607 | -1.65614172  | 3.79E-17 | 9.23E-16 | TMEM214    |
| ENSG00000185272 | 275.9304874 | 1.080229524 | 8.001111752  | 3.82E-17 | 9.29E-16 | RBM11      |
| ENSG00000179144 | 400.8677649 | 0           | 10.98059629  | 3.94E-17 | 9.59E-16 | GIMAP7     |
| ENSG00000174123 | 244.2023087 | 0           | 10.26562566  | 4.13E-17 | 1.00E-15 | TLR10      |

|                 |             |             |              |          |          |            |
|-----------------|-------------|-------------|--------------|----------|----------|------------|
| ENSG00000059573 | 712.9938083 | 3025.124547 | -2.085137799 | 4.35E-17 | 1.05E-15 | ALDH18A1   |
| ENSG00000165478 | 461.4937021 | 0.336469917 | 10.22218934  | 4.35E-17 | 1.05E-15 | HEPACAM    |
| ENSG00000145632 | 2936.015402 | 625.1649572 | 2.231336069  | 4.37E-17 | 1.06E-15 | PLK2       |
| ENSG00000174791 | 111.3545625 | 823.3402587 | -2.886558083 | 4.38E-17 | 1.06E-15 | RIN1       |
| ENSG00000213203 | 305.2147231 | 0           | 10.58725467  | 5.22E-17 | 1.26E-15 | GIMAP1     |
| ENSG00000145050 | 571.9461026 | 2777.662232 | -2.280094614 | 5.42E-17 | 1.31E-15 | MANF       |
| ENSG00000282608 | 240.9231516 | 0           | 10.24627727  | 5.43E-17 | 1.31E-15 | ADORA3     |
| ENSG00000187912 | 258.7850427 | 0           | 10.34919942  | 5.77E-17 | 1.39E-15 | CLEC17A    |
| ENSG00000144583 | 2.668144092 | 259.8863588 | -6.589857345 | 5.80E-17 | 1.40E-15 | 4-Mar      |
| ENSG00000169413 | 429.2316784 | 0           | 11.07925162  | 5.90E-17 | 1.42E-15 | RNASE6     |
| ENSG00000262877 | 307.0327347 | 40.77233088 | 2.918146781  | 6.15E-17 | 1.48E-15 | AC110285.2 |
| ENSG00000132470 | 7718.589639 | 130.640771  | 5.883384963  | 6.34E-17 | 1.52E-15 | ITGB4      |
| ENSG00000103855 | 941.5121623 | 3356.47261  | -1.833962688 | 6.74E-17 | 1.62E-15 | CD276      |
| novel.999       | 744.1073336 | 0           | 11.87305967  | 6.98E-17 | 1.67E-15 | -          |
| ENSG00000178104 | 837.71586   | 2874.622923 | -1.778948262 | 7.06E-17 | 1.69E-15 | PDE4DIP    |
| ENSG00000281404 | 145.211714  | 3.168712922 | 5.498015029  | 7.38E-17 | 1.77E-15 | LINC01176  |
| ENSG00000169432 | 1789.18439  | 26.99897841 | 6.044882635  | 7.62E-17 | 1.82E-15 | SCN9A      |
| ENSG00000179388 | 1463.355318 | 7.754125285 | 7.55415763   | 7.68E-17 | 1.83E-15 | EGR3       |
| ENSG00000127084 | 290.6354935 | 0           | 10.51662619  | 7.87E-17 | 1.88E-15 | FGD3       |
| ENSG00000196872 | 222.9106634 | 1.487519214 | 7.268535853  | 8.31E-17 | 1.98E-15 | KIAA1211L  |
| ENSG00000197992 | 655.1596842 | 0           | 11.68937926  | 8.43E-17 | 2.01E-15 | CLEC9A     |
| ENSG00000276231 | 141.2526915 | 2.261960402 | 6.020770845  | 8.57E-17 | 2.04E-15 | PIK3R6     |
| ENSG00000106105 | 774.8632091 | 3982.574118 | -2.361850281 | 8.57E-17 | 2.04E-15 | GARS       |
| ENSG00000160691 | 1354.085782 | 11005.27564 | -3.02284164  | 8.81E-17 | 2.09E-15 | SHC1       |
| ENSG00000232774 | 3.883945353 | 104.181428  | -4.732486437 | 8.90E-17 | 2.11E-15 | AL355916.1 |
| ENSG00000151650 | 261.3782237 | 0           | 10.36362831  | 8.99E-17 | 2.13E-15 | VENTX      |
| ENSG00000140030 | 507.212631  | 0.356539013 | 10.35827673  | 9.20E-17 | 2.18E-15 | GPR65      |
| ENSG00000142512 | 249.1735845 | 17.39707049 | 3.835063777  | 9.24E-17 | 2.19E-15 | SIGLEC10   |
| ENSG00000158321 | 790.3080756 | 156.5191593 | 2.335073122  | 9.62E-17 | 2.27E-15 | AUTS2      |
| ENSG00000149636 | 170.1459894 | 623.8312314 | -1.87476121  | 9.80E-17 | 2.31E-15 | DSN1       |
| ENSG00000165688 | 808.8885366 | 2384.727932 | -1.559852411 | 9.84E-17 | 2.32E-15 | PMPCA      |
| ENSG0000010671  | 437.1155201 | 0.356539013 | 10.14371811  | 9.99E-17 | 2.36E-15 | BTK        |
| ENSG00000171817 | 145.164431  | 7.367932171 | 4.321302214  | 1.04E-16 | 2.45E-15 | ZNF540     |
| ENSG00000184730 | 340.8075869 | 0.743759607 | 8.8887286    | 1.08E-16 | 2.54E-15 | APOBR      |
| ENSG00000175489 | 289.4113154 | 0           | 10.51057629  | 1.09E-16 | 2.57E-15 | LRRC25     |
| ENSG00000163584 | 341.1336635 | 3037.969185 | -3.154884367 | 1.14E-16 | 2.67E-15 | RPL22L1    |
| ENSG00000105697 | 321.807052  | 0           | 10.66399017  | 1.17E-16 | 2.74E-15 | HAMP       |
| ENSG00000100462 | 310.9806161 | 1200.025562 | -1.948568874 | 1.20E-16 | 2.82E-15 | PRMT5      |
| ENSG00000136404 | 151.8600778 | 10.54854185 | 3.832447096  | 1.26E-16 | 2.94E-15 | TM6SF1     |
| ENSG00000259134 | 326.5369816 | 0           | 10.68469074  | 1.27E-16 | 2.98E-15 | LINC00924  |
| ENSG00000160791 | 441.852488  | 0           | 11.12105966  | 1.33E-16 | 3.10E-15 | CCR5       |
| ENSG00000189091 | 1427.897943 | 4777.668006 | -1.742512552 | 1.35E-16 | 3.16E-15 | SF3B3      |
| ENSG00000164649 | 68.62654879 | 467.8068643 | -2.767687822 | 1.40E-16 | 3.26E-15 | CDCA7L     |
| ENSG00000183401 | 485.4319653 | 86.44331128 | 2.488450307  | 1.41E-16 | 3.29E-15 | CCDC159    |
| ENSG00000181789 | 1609.094754 | 6618.664185 | -2.040288724 | 1.43E-16 | 3.34E-15 | COPG1      |
| ENSG00000135931 | 136.2244032 | 1485.763919 | -3.447123644 | 1.46E-16 | 3.40E-15 | ARMC9      |
| ENSG00000124749 | 563.8628381 | 13.32057757 | 5.39563521   | 1.46E-16 | 3.40E-15 | COL21A1    |
| ENSG00000196460 | 13.69846721 | 678.2339057 | -5.630874061 | 1.53E-16 | 3.57E-15 | REFX8      |
| ENSG00000163734 | 4.548509626 | 438.5802249 | -6.591820324 | 1.54E-16 | 3.58E-15 | CXCL3      |
| ENSG00000170891 | 181.8318878 | 3.048298346 | 5.844280202  | 1.55E-16 | 3.60E-15 | CYTL1      |
| ENSG00000198142 | 1167.08439  | 327.8869731 | 1.831970981  | 1.55E-16 | 3.60E-15 | SOWAHC     |

|                 |             |             |              |          |          |             |
|-----------------|-------------|-------------|--------------|----------|----------|-------------|
| ENSG00000047365 | 581.4338799 | 7.839153564 | 6.191045062  | 1.56E-16 | 3.61E-15 | ARAP2       |
| ENSG00000245105 | 115.3395124 | 5.289033778 | 4.429310498  | 1.56E-16 | 3.61E-15 | A2M-AS1     |
| ENSG00000163590 | 231.9625951 | 39.64263494 | 2.55082244   | 1.58E-16 | 3.66E-15 | PPM1L       |
| ENSG00000144366 | 1403.45596  | 216.2471564 | 2.697765421  | 1.65E-16 | 3.81E-15 | GULP1       |
| ENSG00000140945 | 47.15510501 | 1710.774478 | -5.180244953 | 1.67E-16 | 3.85E-15 | CDH13       |
| ENSG00000138759 | 882.3867823 | 152.1118815 | 2.536547405  | 1.70E-16 | 3.92E-15 | FRAS1       |
| ENSG00000229132 | 72.42288057 | 332.5236157 | -2.199708136 | 1.71E-16 | 3.93E-15 | EIF4A1P10   |
| ENSG00000168779 | 7.688839213 | 460.8976148 | -5.911648067 | 1.72E-16 | 3.97E-15 | SHOX2       |
| novel.74        | 380.0290222 | 0           | 10.90386946  | 1.73E-16 | 3.98E-15 | -           |
| ENSG00000223891 | 337.3627621 | 46.12542475 | 2.866668379  | 1.75E-16 | 4.01E-15 | OSER1-DT    |
| ENSG00000162706 | 1416.885441 | 29.11043778 | 5.61092053   | 1.75E-16 | 4.02E-15 | CADM3       |
| ENSG00000198353 | 30.13828904 | 327.0998176 | -3.441234033 | 1.79E-16 | 4.11E-15 | HOXC4       |
| ENSG00000286220 | 323.3084585 | 1.518200796 | 7.793205396  | 1.91E-16 | 4.37E-15 | AC007546.3  |
| ENSG00000260549 | 277.8762995 | 2002.052708 | -2.848658246 | 1.91E-16 | 4.38E-15 | MT1L        |
| ENSG00000247774 | 337.2756464 | 0.693008929 | 8.878656064  | 1.92E-16 | 4.38E-15 | PCED1B-AS1  |
| ENSG00000089597 | 4615.611963 | 15514.50436 | -1.749007714 | 1.94E-16 | 4.44E-15 | GANAB       |
| ENSG00000085999 | 40.91674207 | 292.9486712 | -2.839969492 | 1.97E-16 | 4.51E-15 | RAD54L      |
| ENSG00000227039 | 250.0504281 | 7.692633727 | 5.034457114  | 2.06E-16 | 4.70E-15 | ITGB2-AS1   |
| ENSG00000103811 | 2036.292389 | 153.1135044 | 3.734135553  | 2.10E-16 | 4.78E-15 | CTSH        |
| ENSG00000175463 | 242.2663821 | 1.386017859 | 7.409092583  | 2.14E-16 | 4.87E-15 | TBC1D10C    |
| ENSG00000231160 | 137.3451838 | 6.765940506 | 4.336714611  | 2.18E-16 | 4.95E-15 | KLF3-AS1    |
| ENSG00000074842 | 1638.630949 | 6110.688914 | -1.898824009 | 2.22E-16 | 5.04E-15 | MYDGF       |
| ENSG00000169436 | 18.43322991 | 215.1490755 | -3.543085543 | 2.24E-16 | 5.08E-15 | COL22A1     |
| ENSG00000149257 | 4236.951363 | 26925.96867 | -2.667922928 | 2.30E-16 | 5.21E-15 | SERPINH1    |
| ENSG00000073350 | 137.1160219 | 6.339737595 | 4.419529448  | 2.47E-16 | 5.61E-15 | LLGL2       |
| ENSG00000171291 | 328.4451301 | 29.87914677 | 3.464182025  | 2.53E-16 | 5.73E-15 | ZNF439      |
| ENSG00000196911 | 459.762478  | 136.5706848 | 1.750890386  | 2.55E-16 | 5.77E-15 | KPNA5       |
| ENSG00000130520 | 853.0062812 | 3237.57873  | -1.924431016 | 2.58E-16 | 5.83E-15 | LSM4        |
| ENSG00000155265 | 137.349016  | 4.483782613 | 4.974505168  | 2.58E-16 | 5.84E-15 | GOLGA7B     |
| ENSG00000097021 | 599.7319278 | 1953.123188 | -1.703419956 | 2.75E-16 | 6.21E-15 | ACOT7       |
| ENSG00000151117 | 346.0902804 | 42.34128235 | 3.036577098  | 2.76E-16 | 6.22E-15 | TMEM86A     |
| ENSG00000073282 | 189.4299647 | 3.108505634 | 5.893981356  | 2.77E-16 | 6.24E-15 | TP63        |
| ENSG00000074410 | 8.000884792 | 2106.273411 | -8.043784552 | 2.79E-16 | 6.29E-15 | CA12        |
| ENSG00000117069 | 507.4817441 | 0.672939833 | 9.476911376  | 2.81E-16 | 6.33E-15 | ST6GALNAC5  |
| ENSG00000104635 | 255.945219  | 4161.403514 | -4.023295638 | 2.82E-16 | 6.33E-15 | SLC39A14    |
| ENSG00000272848 | 280.4753504 | 11.92394722 | 4.544604381  | 2.87E-16 | 6.44E-15 | AL135910.1  |
| ENSG00000090097 | 5723.640682 | 1142.737194 | 2.324371904  | 2.90E-16 | 6.50E-15 | PCBP4       |
| ENSG00000168280 | 197.1444474 | 4.401194479 | 5.50189146   | 2.92E-16 | 6.55E-15 | KIF5C       |
| ENSG00000135624 | 2878.622757 | 9746.305975 | -1.759514633 | 2.96E-16 | 6.63E-15 | CCT7        |
| ENSG00000235750 | 257.992035  | 1.682349583 | 7.194234925  | 2.96E-16 | 6.63E-15 | KIAA0040    |
| ENSG00000105486 | 247.6518206 | 889.052366  | -1.844272365 | 3.01E-16 | 6.72E-15 | LIG1        |
| ENSG00000173786 | 18336.32792 | 2874.032915 | 2.673530508  | 3.07E-16 | 6.85E-15 | CNP         |
| ENSG00000135218 | 109.7947337 | 3.546476906 | 4.939928747  | 3.22E-16 | 7.18E-15 | CD36        |
| ENSG00000188859 | 140.5454754 | 3.302051734 | 5.434109445  | 3.31E-16 | 7.37E-15 | FAM78B      |
| ENSG00000103184 | 513.0551243 | 0.336469917 | 10.37481381  | 3.32E-16 | 7.40E-15 | SEC14L5     |
| ENSG00000160219 | 314.9401364 | 48.24446134 | 2.704888309  | 3.33E-16 | 7.40E-15 | GAB3        |
| ENSG00000148400 | 1969.480507 | 360.594557  | 2.449124895  | 3.35E-16 | 7.46E-15 | NOTCH1      |
| ENSG00000187840 | 326.9746073 | 1803.24187  | -2.463560658 | 3.41E-16 | 7.57E-15 | EIF4EBP1    |
| ENSG00000100296 | 287.7024877 | 938.3578271 | -1.705379739 | 3.48E-16 | 7.73E-15 | THOC5       |
| ENSG00000173757 | 1895.25934  | 721.7662849 | 1.392892417  | 3.48E-16 | 7.73E-15 | STAT5B      |
| ENSG00000283154 | 29.33127847 | 164.4229681 | -2.486558447 | 3.61E-16 | 8.01E-15 | IQCJ-SCHIP1 |

|                 |             |             |              |          |          |            |
|-----------------|-------------|-------------|--------------|----------|----------|------------|
| ENSG0000005844  | 554.2351608 | 0.387220594 | 10.48619927  | 3.71E-16 | 8.21E-15 | ITGAL      |
| ENSG00000092201 | 1488.446065 | 3955.768155 | -1.41022527  | 3.76E-16 | 8.33E-15 | SUPT16H    |
| ENSG00000160712 | 932.918044  | 171.1152163 | 2.448120109  | 3.78E-16 | 8.37E-15 | IL6R       |
| ENSG00000108239 | 657.1140632 | 212.7369649 | 1.626965511  | 3.89E-16 | 8.60E-15 | TBC1D12    |
| ENSG00000181773 | 14.46611612 | 178.8971166 | -3.624842874 | 3.93E-16 | 8.68E-15 | GPR3       |
| ENSG00000163083 | 153.3046849 | 5.554683921 | 4.759077074  | 3.94E-16 | 8.68E-15 | INHBB      |
| ENSG00000188580 | 314.1829457 | 0           | 10.62920874  | 4.01E-16 | 8.84E-15 | NKAIN2     |
| ENSG00000106799 | 2780.235271 | 909.4087465 | 1.612309384  | 4.12E-16 | 9.08E-15 | TGFBR1     |
| ENSG00000149054 | 10.37460566 | 126.6939269 | -3.615637951 | 4.13E-16 | 9.08E-15 | ZNF215     |
| ENSG00000175785 | 209.4844967 | 0           | 10.04462661  | 4.13E-16 | 9.08E-15 | PRIMA1     |
| ENSG00000224318 | 233.0623198 | 0           | 10.19848645  | 4.14E-16 | 9.09E-15 | CHL1-AS2   |
| ENSG00000196878 | 20.54157494 | 612.0017094 | -4.899570446 | 4.15E-16 | 9.11E-15 | LAMB3      |
| ENSG00000148429 | 1344.832108 | 275.9182855 | 2.284773423  | 4.31E-16 | 9.46E-15 | USP6NL     |
| ENSG00000091127 | 134.1980443 | 468.9889803 | -1.805298097 | 4.35E-16 | 9.53E-15 | PUS7       |
| ENSG00000188015 | 5.42697852  | 125.479845  | -4.526995488 | 4.37E-16 | 9.57E-15 | S100A3     |
| ENSG00000249353 | 205.4860695 | 820.1367199 | -1.997375799 | 4.44E-16 | 9.71E-15 | NPM1P27    |
| ENSG00000117154 | 222.592464  | 0           | 10.13186222  | 4.52E-16 | 9.87E-15 | IGSF21     |
| ENSG00000185306 | 384.5823052 | 2.058957692 | 7.506967652  | 4.64E-16 | 1.01E-14 | C12orf56   |
| ENSG00000163803 | 203.7868705 | 6.786009602 | 4.904422086  | 4.69E-16 | 1.02E-14 | PLB1       |
| ENSG00000041353 | 10.44634872 | 698.98126   | -6.06838862  | 4.73E-16 | 1.03E-14 | RAB27B     |
| ENSG00000136514 | 206.9271295 | 31.05167783 | 2.733240464  | 4.74E-16 | 1.03E-14 | RTP4       |
| ENSG00000224243 | 301.2488799 | 0           | 10.5686701   | 4.91E-16 | 1.07E-14 | SOX1-OT    |
| ENSG00000184445 | 206.9771767 | 1006.184544 | -2.280799649 | 4.93E-16 | 1.07E-14 | KNTC1      |
| ENSG00000176890 | 63.04397423 | 810.1544919 | -3.684731068 | 5.04E-16 | 1.09E-14 | TYMS       |
| ENSG00000143847 | 19.69312269 | 931.4305469 | -5.563626521 | 5.09E-16 | 1.10E-14 | PPFIA4     |
| ENSG00000253552 | 4.870726937 | 130.5394324 | -4.749306573 | 5.09E-16 | 1.10E-14 | HOXA-AS2   |
| ENSG00000109519 | 482.9783231 | 1531.972847 | -1.665224778 | 5.17E-16 | 1.12E-14 | GRPEL1     |
| ENSG00000178965 | 235.5879467 | 0           | 10.21409992  | 5.21E-16 | 1.13E-14 | ERICH3     |
| ENSG00000134042 | 175.788268  | 1.436768536 | 6.935526214  | 5.27E-16 | 1.14E-14 | MRO        |
| ENSG00000183856 | 54.21523756 | 1435.708536 | -4.725405905 | 5.29E-16 | 1.14E-14 | IQGAP3     |
| ENSG00000165312 | 807.4797025 | 119.5769228 | 2.757462982  | 5.66E-16 | 1.22E-14 | OTUD1      |
| ENSG00000120327 | 140.3770859 | 6.919348414 | 4.35387135   | 5.72E-16 | 1.23E-14 | PCDHB14    |
| ENSG00000129450 | 109.6589116 | 4.646775526 | 4.556719365  | 6.00E-16 | 1.29E-14 | SIGLEC9    |
| ENSG00000164124 | 762.0667505 | 39.9912584  | 4.247908611  | 6.08E-16 | 1.31E-14 | TMEM144    |
| ENSG00000149781 | 761.1632025 | 71.00557651 | 3.425313474  | 6.37E-16 | 1.37E-14 | FERMT3     |
| novel.327       | 349.8533223 | 0           | 10.78445392  | 6.42E-16 | 1.38E-14 | -          |
| ENSG00000137203 | 209.2734991 | 1.4981317   | 7.175403964  | 6.75E-16 | 1.45E-14 | TFAP2A     |
| ENSG00000185010 | 293.1635995 | 51.92068103 | 2.498975019  | 6.96E-16 | 1.49E-14 | F8         |
| ENSG00000065000 | 1964.78453  | 5587.845393 | -1.507878088 | 7.09E-16 | 1.52E-14 | AP3D1      |
| ENSG00000169429 | 137.7632913 | 31148.08059 | -7.82071225  | 7.44E-16 | 1.59E-14 | CXCL8      |
| ENSG00000076555 | 642.5354336 | 92.94257416 | 2.788030062  | 7.48E-16 | 1.60E-14 | ACACB      |
| ENSG00000105122 | 413.5349039 | 0.356539013 | 10.06368657  | 7.51E-16 | 1.61E-14 | RASAL3     |
| ENSG00000101000 | 115.4442064 | 1206.166065 | -3.38553097  | 7.80E-16 | 1.67E-14 | PROCR      |
| ENSG00000237438 | 423.3702002 | 30.49329198 | 3.792032888  | 7.96E-16 | 1.70E-14 | CECR7      |
| ENSG00000184500 | 5523.307443 | 427.2513376 | 3.691753773  | 8.21E-16 | 1.75E-14 | PROS1      |
| ENSG00000139679 | 2605.112283 | 134.6070767 | 4.272887095  | 8.26E-16 | 1.76E-14 | LPAR6      |
| ENSG00000284526 | 246.0547105 | 0           | 10.27677256  | 8.35E-16 | 1.78E-14 | AC015802.6 |
| ENSG00000147576 | 218.7700628 | 12.90010685 | 4.09835961   | 8.53E-16 | 1.82E-14 | ADHFE1     |
| ENSG00000197256 | 8236.265697 | 3144.630345 | 1.389106571  | 8.55E-16 | 1.82E-14 | KANK2      |
| ENSG00000120280 | 187.3364503 | 0           | 9.883259828  | 8.61E-16 | 1.83E-14 | CXorf21    |
| ENSG00000180233 | 462.6283997 | 76.89022746 | 2.586768164  | 8.71E-16 | 1.85E-14 | ZNRF2      |



|                 |             |             |              |          |          |            |
|-----------------|-------------|-------------|--------------|----------|----------|------------|
| ENSG00000140538 | 1093.410125 | 0.336469917 | 11.46652427  | 8.80E-16 | 1.87E-14 | NTRK3      |
| ENSG00000128944 | 168.4747277 | 1197.46441  | -2.829611219 | 8.97E-16 | 1.90E-14 | KNSTRN     |
| ENSG00000053747 | 1109.500078 | 107.1464147 | 3.370248881  | 8.98E-16 | 1.90E-14 | LAMA3      |
| ENSG00000164611 | 115.499724  | 1732.26295  | -3.906834796 | 9.36E-16 | 1.98E-14 | PTTG1      |
| ENSG00000226415 | 54.83538214 | 304.3431976 | -2.471948117 | 1.01E-15 | 2.14E-14 | TPI1P1     |
| ENSG00000265808 | 1388.650809 | 4421.85308  | -1.671041029 | 1.02E-15 | 2.16E-14 | SEC22B     |
| ENSG00000166928 | 245.3972242 | 0           | 10.27255746  | 1.04E-15 | 2.19E-14 | MS4A14     |
| ENSG00000107317 | 1721.799668 | 6.471920532 | 8.056222941  | 1.04E-15 | 2.19E-14 | PTGDS      |
| ENSG00000162882 | 353.5502417 | 12.8424681  | 4.76898965   | 1.04E-15 | 2.19E-14 | HAAO       |
| ENSG00000018280 | 281.1020636 | 12.28981445 | 4.519180256  | 1.06E-15 | 2.24E-14 | SLC11A1    |
| ENSG00000136250 | 487.8792917 | 0.387220594 | 10.30221189  | 1.07E-15 | 2.26E-14 | AOAH       |
| ENSG00000132744 | 183.6200246 | 0           | 9.854387396  | 1.13E-15 | 2.37E-14 | ACY3       |
| ENSG00000174442 | 166.0186644 | 819.7930707 | -2.30431735  | 1.14E-15 | 2.40E-14 | ZWILCH     |
| ENSG00000099194 | 13638.78854 | 3728.220421 | 1.871086696  | 1.14E-15 | 2.40E-14 | SCD        |
| ENSG00000162738 | 225.3703177 | 24.98704699 | 3.170304399  | 1.22E-15 | 2.57E-14 | VANGL2     |
| ENSG00000104043 | 407.4362394 | 60.83415635 | 2.744264196  | 1.23E-15 | 2.57E-14 | ATP8B4     |
| ENSG00000133048 | 16.66243072 | 721.4346647 | -5.436609242 | 1.25E-15 | 2.61E-14 | CHI3L1     |
| ENSG00000082126 | 9.002567969 | 129.2972375 | -3.838699193 | 1.26E-15 | 2.63E-14 | MPP4       |
| ENSG00000196411 | 402.0846223 | 1292.1027   | -1.684139617 | 1.28E-15 | 2.69E-14 | EPHB4      |
| ENSG00000126453 | 176.7517723 | 674.5271837 | -1.93235743  | 1.29E-15 | 2.69E-14 | BCL2L12    |
| ENSG00000180398 | 1509.805589 | 7529.614481 | -2.318299063 | 1.31E-15 | 2.74E-14 | MCFD2      |
| ENSG00000160593 | 547.7405229 | 0           | 11.4310213   | 1.32E-15 | 2.75E-14 | JAML       |
| ENSG00000259673 | 186.1620198 | 30.66445723 | 2.598413852  | 1.32E-15 | 2.76E-14 | IQCH-AS1   |
| ENSG00000123360 | 170.5530713 | 4.555886656 | 5.207464543  | 1.35E-15 | 2.81E-14 | PDE1B      |
| ENSG00000130244 | 545.7833197 | 166.9729595 | 1.708284994  | 1.38E-15 | 2.87E-14 | FAM98C     |
| ENSG00000115935 | 3284.377108 | 1078.825526 | 1.606391407  | 1.44E-15 | 3.00E-14 | WIPF1      |
| ENSG00000136295 | 990.2281954 | 5849.072125 | -2.562297741 | 1.45E-15 | 3.00E-14 | TTYH3      |
| ENSG00000111879 | 135.1885159 | 8.122432658 | 4.044437477  | 1.45E-15 | 3.01E-14 | FAM184A    |
| ENSG00000165661 | 357.5718055 | 1172.071063 | -1.712552326 | 1.46E-15 | 3.03E-14 | QSOX2      |
| ENSG00000141756 | 2246.654202 | 17751.03001 | -2.982083858 | 1.51E-15 | 3.13E-14 | FKBP10     |
| ENSG00000070190 | 210.1472226 | 0           | 10.04881335  | 1.53E-15 | 3.17E-14 | DAPP1      |
| ENSG00000113532 | 364.9999549 | 38.33676508 | 3.256265403  | 1.54E-15 | 3.18E-14 | ST8SIA4    |
| ENSG00000101444 | 738.0244005 | 3615.62789  | -2.292634141 | 1.56E-15 | 3.24E-14 | AHCY       |
| ENSG00000124875 | 35.31264202 | 1931.949767 | -5.775005589 | 1.59E-15 | 3.28E-14 | CXCL6      |
| ENSG00000272888 | 1210.585723 | 377.5869538 | 1.68084966   | 1.63E-15 | 3.36E-14 | LINC01578  |
| novel.367       | 1.774560141 | 141.7469155 | -6.294644145 | 1.68E-15 | 3.46E-14 | -          |
| ENSG00000245522 | 3.959520633 | 92.43583808 | -4.55105107  | 1.70E-15 | 3.51E-14 | AC026250.1 |
| ENSG00000224616 | 204.1264261 | 34.20147753 | 2.573489884  | 1.71E-15 | 3.53E-14 | RTCA-AS1   |
| ENSG00000105852 | 118.6870511 | 1.762625967 | 6.0510619    | 1.83E-15 | 3.76E-14 | PON3       |
| ENSG00000163823 | 515.8636054 | 8.325306974 | 5.974628213  | 1.84E-15 | 3.78E-14 | CCR1       |
| ENSG00000011485 | 746.4651488 | 2334.110821 | -1.64480252  | 1.84E-15 | 3.78E-14 | PPP5C      |
| ENSG00000144354 | 26.3133368  | 628.1349183 | -4.577193376 | 1.85E-15 | 3.81E-14 | CDCA7      |
| ENSG00000160310 | 6610.475146 | 1837.463964 | 1.847050113  | 1.87E-15 | 3.83E-14 | PRMT2      |
| ENSG00000138092 | 76.07759279 | 456.9475854 | -2.586216261 | 1.92E-15 | 3.94E-14 | CENPO      |
| ENSG00000103260 | 9923.675306 | 1964.464904 | 2.336868844  | 1.93E-15 | 3.95E-14 | METR1      |
| ENSG00000214787 | 207.1194088 | 0           | 10.02817675  | 1.95E-15 | 3.98E-14 | MS4A4E     |
| ENSG00000065150 | 2576.900285 | 6350.350053 | -1.301199022 | 1.96E-15 | 4.02E-14 | IPO5       |
| ENSG00000225492 | 189.1054549 | 2.058957692 | 6.475801097  | 1.98E-15 | 4.04E-14 | GBP1P1     |
| ENSG00000182580 | 300.9714662 | 18.43472168 | 4.032064855  | 1.98E-15 | 4.04E-14 | EPHB3      |
| ENSG00000157214 | 32.51430339 | 977.5597429 | -4.910376006 | 2.02E-15 | 4.12E-14 | STEAP2     |
| ENSG00000138670 | 264.9995147 | 0.693008929 | 8.530501306  | 2.04E-15 | 4.16E-14 | RASGEF1B   |

|                 |             |             |              |          |          |            |
|-----------------|-------------|-------------|--------------|----------|----------|------------|
| ENSG00000197081 | 1103.056096 | 6782.700608 | -2.620374816 | 2.05E-15 | 4.17E-14 | IGF2R      |
| ENSG00000101003 | 58.56323361 | 600.1336621 | -3.356884699 | 2.11E-15 | 4.30E-14 | GINS1      |
| ENSG00000286546 | 342.6770401 | 0           | 10.75450882  | 2.13E-15 | 4.33E-14 | AL079338.1 |
| novel.302       | 297.0114904 | 0           | 10.54826129  | 2.15E-15 | 4.37E-14 | -          |
| ENSG00000100401 | 1488.815124 | 5701.629377 | -1.937281543 | 2.17E-15 | 4.41E-14 | RANGAP1    |
| ENSG00000187902 | 193.6187473 | 1.467450118 | 7.068736001  | 2.18E-15 | 4.43E-14 | SHISA7     |
| ENSG00000187583 | 2.465593581 | 150.6592822 | -5.948976427 | 2.22E-15 | 4.49E-14 | PLEKHN1    |
| ENSG00000167613 | 328.6785209 | 0           | 10.69416357  | 2.22E-15 | 4.50E-14 | LAIR1      |
| ENSG00000138615 | 578.9922994 | 4.515748464 | 6.985941189  | 2.23E-15 | 4.51E-14 | CILP       |
| ENSG00000176014 | 2470.783459 | 10030.94179 | -2.021406791 | 2.27E-15 | 4.59E-14 | TUBB6      |
| ENSG00000144642 | 1413.152945 | 369.140928  | 1.936011771  | 2.29E-15 | 4.63E-14 | RBMS3      |
| ENSG00000173207 | 179.6363561 | 1162.638865 | -2.694835889 | 2.30E-15 | 4.64E-14 | CKS1B      |
| ENSG00000172893 | 253.3992211 | 978.5135511 | -1.949591304 | 2.38E-15 | 4.80E-14 | DHCR7      |
| ENSG00000187554 | 233.2722622 | 2.50754145  | 6.538313624  | 2.41E-15 | 4.85E-14 | TLR5       |
| ENSG00000227036 | 169.8045401 | 27.44383776 | 2.625142344  | 2.49E-15 | 5.01E-14 | LINC00511  |
| ENSG00000187961 | 181.2312599 | 732.5929691 | -2.014727044 | 2.51E-15 | 5.06E-14 | KLHL17     |
| ENSG00000185634 | 1517.063503 | 121.0385591 | 3.645832749  | 2.53E-15 | 5.10E-14 | SHC4       |
| ENSG00000107611 | 562.53278   | 29.48833016 | 4.259888082  | 2.54E-15 | 5.11E-14 | CUBN       |
| ENSG00000162722 | 311.1673532 | 0           | 10.61518395  | 2.57E-15 | 5.16E-14 | TRIM58     |
| ENSG00000100934 | 973.8275615 | 4711.444972 | -2.274474528 | 2.60E-15 | 5.22E-14 | SEC23A     |
| ENSG00000165801 | 5711.681646 | 1452.185344 | 1.975902241  | 2.62E-15 | 5.25E-14 | ARHGEF40   |
| ENSG00000112182 | 274.4155052 | 9.527235343 | 4.858642808  | 2.62E-15 | 5.25E-14 | BACH2      |
| ENSG00000114993 | 2237.18572  | 353.4163996 | 2.66275482   | 2.63E-15 | 5.26E-14 | RTKN       |
| ENSG00000164347 | 253.0576293 | 797.7740332 | -1.656643087 | 2.71E-15 | 5.43E-14 | GFM2       |
| ENSG00000164032 | 1056.583322 | 5869.117112 | -2.473834137 | 2.84E-15 | 5.69E-14 | H2AFZ      |
| ENSG00000004487 | 850.6770955 | 2351.304269 | -1.466688973 | 2.89E-15 | 5.77E-14 | KDM1A      |
| ENSG00000183044 | 1008.853777 | 90.43649255 | 3.476886386  | 2.90E-15 | 5.80E-14 | ABAT       |
| ENSG00000160949 | 75.10076912 | 449.5686081 | -2.581370647 | 2.92E-15 | 5.82E-14 | TONSL      |
| ENSG00000114270 | 528.3656337 | 13315.31245 | -4.655402843 | 2.97E-15 | 5.92E-14 | COL7A1     |
| ENSG00000167772 | 227.9574721 | 3956.445821 | -4.117461604 | 2.97E-15 | 5.92E-14 | ANGPTL4    |
| ENSG00000134917 | 500.2656035 | 0.713078025 | 9.44593683   | 3.04E-15 | 6.05E-14 | ADAMTS8    |
| ENSG00000105355 | 681.613675  | 3993.388745 | -2.550670004 | 3.05E-15 | 6.06E-14 | PLIN3      |
| ENSG00000145907 | 1706.400029 | 4215.660828 | -1.304807878 | 3.12E-15 | 6.20E-14 | G3BP1      |
| ENSG00000106560 | 352.7950431 | 4.106018629 | 6.449174171  | 3.12E-15 | 6.20E-14 | GIMAP2     |
| ENSG00000127824 | 107.6172516 | 1174.6296   | -3.448643409 | 3.13E-15 | 6.22E-14 | TUBA4A     |
| ENSG00000267594 | 297.9089066 | 0           | 10.55260519  | 3.14E-15 | 6.22E-14 | CYP4F24P   |
| ENSG00000244617 | 99.24475868 | 5.676254372 | 4.116495362  | 3.21E-15 | 6.37E-14 | ASPRV1     |
| ENSG00000132718 | 3915.990701 | 901.0479596 | 2.120020722  | 3.23E-15 | 6.39E-14 | SYT11      |
| ENSG00000102172 | 1253.192121 | 4407.7476   | -1.814314968 | 3.25E-15 | 6.44E-14 | SMS        |
| ENSG00000166582 | 95.6536269  | 582.3050549 | -2.606310159 | 3.28E-15 | 6.49E-14 | CENPV      |
| ENSG00000198019 | 228.5785024 | 0           | 10.17054621  | 3.42E-15 | 6.76E-14 | FCGR1B     |
| ENSG00000143851 | 187.8707766 | 0           | 9.887138039  | 3.43E-15 | 6.77E-14 | PTPN7      |
| ENSG00000274536 | 222.3771201 | 0           | 10.13038479  | 3.44E-15 | 6.79E-14 | AL034397.3 |
| ENSG00000146555 | 436.6655877 | 17.65339242 | 4.61686101   | 3.46E-15 | 6.82E-14 | SDK1       |
| ENSG00000134627 | 222.096859  | 20.52423256 | 3.445983356  | 3.48E-15 | 6.85E-14 | PIWIL4     |
| ENSG00000163735 | 1.536764924 | 8663.877295 | -12.46689481 | 3.54E-15 | 6.97E-14 | CXCL5      |
| ENSG00000127463 | 864.9454476 | 3536.154321 | -2.031487437 | 3.58E-15 | 7.03E-14 | EMC1       |
| ENSG00000130726 | 2403.300791 | 8053.42134  | -1.744630956 | 3.62E-15 | 7.11E-14 | TRIM28     |
| ENSG00000133019 | 228.5634156 | 0           | 10.17034182  | 3.63E-15 | 7.13E-14 | CHRM3      |
| ENSG00000170390 | 480.1801983 | 110.6780411 | 2.117663343  | 3.66E-15 | 7.18E-14 | DCLK2      |
| ENSG00000136628 | 1543.577437 | 4605.300329 | -1.577110396 | 3.67E-15 | 7.19E-14 | EPRS       |

|                 |             |             |              |          |          |            |
|-----------------|-------------|-------------|--------------|----------|----------|------------|
| ENSG00000138434 | 9744.460444 | 2394.799274 | 2.024541044  | 3.73E-15 | 7.30E-14 | ITPRID2    |
| ENSG00000257337 | 633.7273089 | 69.23431148 | 3.190555241  | 3.73E-15 | 7.31E-14 | AC068888.1 |
| ENSG00000183691 | 4.612802068 | 264.7635484 | -5.851397903 | 3.86E-15 | 7.55E-14 | NOG        |
| ENSG00000070778 | 1718.721502 | 491.1552959 | 1.807239509  | 4.07E-15 | 7.96E-14 | AL162171.1 |
| ENSG00000117143 | 372.7252212 | 2087.789397 | -2.486086752 | 4.18E-15 | 8.17E-14 | UAP1       |
| ENSG00000118785 | 2205.432227 | 71.31521766 | 4.951009182  | 4.19E-15 | 8.18E-14 | SPP1       |
| ENSG00000100368 | 197.0029693 | 0           | 9.955649881  | 4.30E-15 | 8.39E-14 | CSF2RB     |
| ENSG00000161847 | 177.7992275 | 751.4306606 | -2.0796434   | 4.31E-15 | 8.40E-14 | RAVER1     |
| ENSG00000155034 | 108.6853073 | 479.2620303 | -2.141082987 | 4.38E-15 | 8.53E-14 | FBXL18     |
| ENSG00000164010 | 504.617258  | 137.4738413 | 1.876175682  | 4.40E-15 | 8.56E-14 | ERMAP      |
| ENSG00000115484 | 1133.860374 | 5282.086956 | -2.219978194 | 4.40E-15 | 8.56E-14 | CCT4       |
| ENSG00000090520 | 632.283299  | 1759.649415 | -1.476733608 | 4.41E-15 | 8.57E-14 | DNAJB11    |
| ENSG00000127418 | 114.0995637 | 1930.36854  | -4.081144863 | 4.65E-15 | 9.03E-14 | FGFRL1     |
| ENSG00000088448 | 4252.809661 | 863.2734463 | 2.30074107   | 4.71E-15 | 9.15E-14 | ANKRD10    |
| ENSG00000160179 | 343.1949387 | 11.2108692  | 4.9256924    | 4.73E-15 | 9.16E-14 | ABCG1      |
| ENSG00000176204 | 245.9482213 | 0           | 10.27607755  | 4.84E-15 | 9.39E-14 | LRRTM4     |
| ENSG00000134222 | 193.4425669 | 848.0242271 | -2.132543916 | 5.10E-15 | 9.88E-14 | PSRC1      |
| ENSG00000286619 | 3.298717306 | 101.1823393 | -4.928563222 | 5.36E-15 | 1.04E-13 | AC119673.2 |
| ENSG00000066032 | 207.568246  | 0           | 10.03144253  | 5.71E-15 | 1.10E-13 | CTNNA2     |
| ENSG00000102053 | 110.7064385 | 7.806031838 | 3.8163124    | 5.79E-15 | 1.12E-13 | ZC3H12B    |
| ENSG00000146250 | 496.7284716 | 10.94637493 | 5.498179966  | 5.82E-15 | 1.12E-13 | PRSS35     |
| ENSG00000144677 | 2482.673018 | 566.3340933 | 2.131604395  | 5.91E-15 | 1.14E-13 | CTDSP1     |
| ENSG00000131016 | 2929.375142 | 15086.37604 | -2.364594611 | 5.96E-15 | 1.15E-13 | AKAP12     |
| ENSG00000108984 | 193.5244104 | 26.61980177 | 2.85606589   | 6.05E-15 | 1.16E-13 | MAP2K6     |
| ENSG00000214517 | 578.8181318 | 1575.197264 | -1.444265698 | 6.08E-15 | 1.17E-13 | PPME1      |
| ENSG00000123374 | 213.2282465 | 1281.573251 | -2.58759094  | 6.43E-15 | 1.24E-13 | CDK2       |
| ENSG00000159131 | 383.1024496 | 1579.866689 | -2.044208843 | 6.50E-15 | 1.25E-13 | GART       |
| ENSG00000213088 | 185.602177  | 4.330374705 | 5.425118939  | 6.52E-15 | 1.25E-13 | ACKR1      |
| ENSG00000225889 | 315.0235343 | 0.356539013 | 9.67142224   | 6.62E-15 | 1.27E-13 | AC012368.1 |
| ENSG00000105366 | 168.0130414 | 0           | 9.726288064  | 6.84E-15 | 1.31E-13 | SIGLEC8    |
| ENSG00000171246 | 12.2852013  | 432.373967  | -5.141428247 | 6.88E-15 | 1.32E-13 | NPTX1      |
| ENSG00000170624 | 553.213591  | 7.246490114 | 6.238315591  | 7.07E-15 | 1.35E-13 | SGCD       |
| ENSG00000118777 | 374.2989688 | 12.83172722 | 4.863824986  | 7.23E-15 | 1.38E-13 | ABCG2      |
| ENSG00000130150 | 1912.327774 | 410.1403118 | 2.220720886  | 7.37E-15 | 1.41E-13 | MOSPD2     |
| ENSG00000139645 | 990.9812719 | 3576.122474 | -1.851394722 | 7.68E-15 | 1.47E-13 | ANKRD52    |
| ENSG00000141497 | 273.2730831 | 0.693008929 | 8.576164693  | 7.73E-15 | 1.48E-13 | ZMYND15    |
| ENSG00000163106 | 187.3146683 | 0           | 9.883019011  | 7.83E-15 | 1.49E-13 | HPGDS      |
| ENSG00000058262 | 3565.957588 | 13071.62293 | -1.874099841 | 7.84E-15 | 1.49E-13 | SEC61A1    |
| ENSG00000027847 | 325.9988669 | 1337.42159  | -2.036351748 | 7.88E-15 | 1.50E-13 | B4GALT7    |
| ENSG00000114646 | 160.8141095 | 4.494523493 | 5.130827049  | 8.13E-15 | 1.55E-13 | CSPG5      |
| ENSG00000164128 | 235.3551668 | 0           | 10.21262706  | 8.14E-15 | 1.55E-13 | NPY1R      |
| ENSG00000072694 | 265.8561007 | 0           | 10.38816501  | 8.24E-15 | 1.57E-13 | FCGR2B     |
| ENSG00000178947 | 104.8896875 | 3.923085015 | 4.73384778   | 8.28E-15 | 1.57E-13 | SMIM10L2A  |
| ENSG00000103740 | 165.1814957 | 2.782648203 | 5.862814321  | 8.30E-15 | 1.58E-13 | ACSBG1     |
| ENSG00000137501 | 486.1114152 | 77.34369151 | 2.648242762  | 8.35E-15 | 1.58E-13 | SYTL2      |
| ENSG00000213047 | 342.6178472 | 71.14546507 | 2.2647625    | 8.43E-15 | 1.60E-13 | DENND1B    |
| ENSG00000068438 | 520.9132655 | 1406.261419 | -1.432851142 | 8.47E-15 | 1.60E-13 | FTSJ1      |
| ENSG00000165474 | 794.5650349 | 11.50591665 | 6.11028575   | 8.59E-15 | 1.62E-13 | GJB2       |
| ENSG00000087589 | 140.3169817 | 4.963176346 | 4.810782159  | 8.69E-15 | 1.64E-13 | CASS4      |
| ENSG00000107829 | 1600.318899 | 505.5382644 | 1.662469175  | 8.82E-15 | 1.67E-13 | FBXW4      |
| ENSG00000176809 | 231.0704505 | 31.22528323 | 2.882728044  | 8.84E-15 | 1.67E-13 | LRRC37A3   |

|                 |             |             |              |          |          |            |
|-----------------|-------------|-------------|--------------|----------|----------|------------|
| ENSG00000185668 | 281.5775949 | 0.387220594 | 9.509277894  | 8.92E-15 | 1.68E-13 | POU3F1     |
| ENSG00000155886 | 489.2234569 | 4.401194479 | 6.807427626  | 8.92E-15 | 1.68E-13 | SLC24A2    |
| ENSG00000234323 | 164.0522953 | 0           | 9.691549086  | 9.30E-15 | 1.75E-13 | LINC01505  |
| ENSG00000046889 | 608.8710543 | 0.336469917 | 10.62186525  | 9.40E-15 | 1.77E-13 | PREX2      |
| ENSG00000120251 | 219.9146752 | 0           | 10.11435536  | 9.40E-15 | 1.77E-13 | GRIA2      |
| ENSG00000182199 | 691.9481639 | 3661.627449 | -2.403921452 | 9.47E-15 | 1.78E-13 | SHMT2      |
| ENSG00000134061 | 231.8986146 | 0           | 10.19089042  | 9.54E-15 | 1.79E-13 | CD180      |
| ENSG00000149212 | 3032.183678 | 223.8725661 | 3.758714224  | 1.01E-14 | 1.90E-13 | SESN3      |
| ENSG00000227195 | 170.637992  | 0           | 9.748848881  | 1.02E-14 | 1.91E-13 | MIR663AHG  |
| ENSG00000197249 | 312.1572261 | 15.24465539 | 4.369693055  | 1.02E-14 | 1.91E-13 | SERPINA1   |
| ENSG00000162998 | 1939.540167 | 16.46922139 | 6.875888601  | 1.02E-14 | 1.91E-13 | FRZB       |
| ENSG00000132128 | 1182.705863 | 2925.544773 | -1.306613989 | 1.04E-14 | 1.94E-13 | LRRC41     |
| ENSG00000135299 | 318.9993096 | 18.4278336  | 4.101941049  | 1.13E-14 | 2.11E-13 | ANKRD6     |
| ENSG00000104870 | 4715.883725 | 1147.262352 | 2.039385677  | 1.13E-14 | 2.11E-13 | FCGRT      |
| ENSG00000120457 | 179.7566355 | 0           | 9.823449019  | 1.15E-14 | 2.16E-13 | KCNJ5      |
| ENSG00000111860 | 677.567669  | 187.23432   | 1.854984771  | 1.16E-14 | 2.16E-13 | CEP85L     |
| ENSG00000227953 | 208.8551496 | 3.801514564 | 5.751227404  | 1.19E-14 | 2.21E-13 | LINC01341  |
| ENSG00000125753 | 973.4665679 | 2673.122056 | -1.457324001 | 1.21E-14 | 2.25E-13 | VASP       |
| ENSG00000251429 | 226.3869177 | 3.912472529 | 5.847602152  | 1.22E-14 | 2.28E-13 | AC098679.2 |
| ENSG00000136828 | 195.8518606 | 19.66018677 | 3.31478944   | 1.26E-14 | 2.35E-13 | RALGPS1    |
| ENSG00000145936 | 158.2649198 | 0           | 9.639730965  | 1.26E-14 | 2.35E-13 | KCNMB1     |
| ENSG00000155660 | 1619.362158 | 16032.89051 | -3.307543062 | 1.27E-14 | 2.36E-13 | PDIA4      |
| ENSG00000177406 | 256.8425357 | 51.08718843 | 2.330631858  | 1.28E-14 | 2.37E-13 | AC021054.1 |
| ENSG00000254726 | 32.71706771 | 412.987136  | -3.657883722 | 1.32E-14 | 2.45E-13 | MEX3A      |
| ENSG00000166387 | 1165.63576  | 35.76598107 | 5.021888026  | 1.37E-14 | 2.53E-13 | PPFIBP2    |
| ENSG00000108010 | 735.6058493 | 2090.263594 | -1.506806622 | 1.39E-14 | 2.58E-13 | GLRX3      |
| ENSG00000196419 | 2619.225564 | 8602.175814 | -1.715585873 | 1.41E-14 | 2.62E-13 | XRCC6      |
| ENSG00000096968 | 765.6732495 | 177.9056395 | 2.10417354   | 1.42E-14 | 2.62E-13 | JAK2       |
| ENSG00000168843 | 322.1555508 | 2.200597239 | 7.21073274   | 1.45E-14 | 2.68E-13 | FSTL5      |
| ENSG00000114279 | 162.2534889 | 1.702418679 | 6.517753304  | 1.46E-14 | 2.70E-13 | FGF12      |
| ENSG00000144381 | 2649.336354 | 11226.88341 | -2.083300432 | 1.55E-14 | 2.87E-13 | HSPD1      |
| ENSG00000136108 | 341.6653845 | 1569.431639 | -2.199771364 | 1.56E-14 | 2.87E-13 | CKAP2      |
| ENSG00000125885 | 52.39110059 | 241.5350303 | -2.205487798 | 1.59E-14 | 2.93E-13 | MCM8       |
| ENSG00000158517 | 176.0405375 | 0           | 9.793474073  | 1.65E-14 | 3.04E-13 | NCF1       |
| ENSG00000185615 | 162.1431393 | 4.768345977 | 5.104186225  | 1.65E-14 | 3.05E-13 | PDIA2      |
| ENSG00000147536 | 39.98644595 | 419.2624537 | -3.390912127 | 1.70E-14 | 3.13E-13 | GINS4      |
| ENSG00000125384 | 17.11065434 | 396.4648775 | -4.537131576 | 1.71E-14 | 3.14E-13 | PTGER2     |
| ENSG00000137726 | 389.4193328 | 0           | 10.93882288  | 1.71E-14 | 3.14E-13 | FXYP6      |
| ENSG00000141696 | 366.2493481 | 2249.197514 | -2.618793826 | 1.72E-14 | 3.16E-13 | P3H4       |
| ENSG00000100883 | 706.0263188 | 2424.60447  | -1.779871812 | 1.74E-14 | 3.18E-13 | SRP54      |
| ENSG00000166265 | 178.6187315 | 7.968896356 | 4.491799328  | 1.77E-14 | 3.24E-13 | CYYR1      |
| ENSG00000203952 | 176.3356457 | 1.069617038 | 7.356642046  | 1.78E-14 | 3.26E-13 | CCDC160    |
| novel.1068      | 376.3931979 | 54.67765634 | 2.778450099  | 1.79E-14 | 3.27E-13 | -          |
| ENSG00000248323 | 3.328947419 | 915.7787986 | -8.103532812 | 1.89E-14 | 3.46E-13 | LUCAT1     |
| ENSG00000163577 | 115.0850638 | 364.9527067 | -1.665263213 | 1.98E-14 | 3.63E-13 | EIF5A2     |
| ENSG00000177542 | 221.0073484 | 991.9066648 | -2.166377226 | 2.01E-14 | 3.67E-13 | SLC25A22   |
| ENSG00000228878 | 136.5103082 | 8.245158985 | 4.049187283  | 2.02E-14 | 3.68E-13 | SEPT7-AS1  |
| ENSG00000079246 | 2877.464337 | 8364.612242 | -1.53955088  | 2.07E-14 | 3.77E-13 | XRCC5      |
| ENSG00000198113 | 167.0321999 | 750.7843528 | -2.168815369 | 2.19E-14 | 4.00E-13 | TOR4A      |
| ENSG00000241749 | 9.307162927 | 153.2883469 | -4.036120851 | 2.20E-14 | 4.01E-13 | RPSAP52    |
| ENSG00000127743 | 588.2737355 | 2.169915658 | 8.087046377  | 2.23E-14 | 4.06E-13 | IL17B      |

|                 |             |             |              |          |          |            |
|-----------------|-------------|-------------|--------------|----------|----------|------------|
| ENSG00000151746 | 1638.629773 | 312.0222304 | 2.392200338  | 2.39E-14 | 4.35E-13 | BICD1      |
| ENSG00000162881 | 109.4717609 | 5.309102873 | 4.353237925  | 2.43E-14 | 4.41E-13 | OXER1      |
| ENSG00000171777 | 139.0198786 | 0           | 9.452675984  | 2.45E-14 | 4.46E-13 | RASGRP4    |
| ENSG00000161940 | 111.4653115 | 1.406086955 | 6.282244549  | 2.61E-14 | 4.74E-13 | BCL6B      |
| ENSG00000196369 | 969.5177908 | 194.7966974 | 2.315746563  | 2.66E-14 | 4.83E-13 | SRGAP2B    |
| ENSG00000168411 | 339.2013014 | 1395.720711 | -2.040715048 | 2.69E-14 | 4.89E-13 | RFWD3      |
| ENSG00000123689 | 46.6109192  | 1627.78851  | -5.127076233 | 2.98E-14 | 5.40E-13 | G0S2       |
| ENSG00000138185 | 802.7585569 | 116.300638  | 2.78464888   | 3.23E-14 | 5.85E-13 | ENTPD1     |
| ENSG00000088930 | 825.6598491 | 2289.543183 | -1.471533107 | 3.26E-14 | 5.90E-13 | XRN2       |
| ENSG00000107738 | 2279.989035 | 266.9776903 | 3.093216826  | 3.34E-14 | 6.03E-13 | VSIR       |
| ENSG00000109321 | 0.586481695 | 329.7214339 | -9.095669149 | 3.36E-14 | 6.07E-13 | AREG       |
| ENSG00000251615 | 118.0102351 | 15.03116859 | 2.970446318  | 3.41E-14 | 6.16E-13 | AC104825.1 |
| ENSG00000140368 | 155.012331  | 4.025742245 | 5.282945058  | 3.48E-14 | 6.28E-13 | PSTPIP1    |
| ENSG00000187474 | 301.4101139 | 0.336469917 | 9.607355707  | 3.49E-14 | 6.29E-13 | FPR3       |
| ENSG00000101197 | 285.4508836 | 0           | 10.49074124  | 3.54E-14 | 6.37E-13 | BIRC7      |
| ENSG00000118308 | 260.5614256 | 0.774441189 | 8.493046468  | 3.54E-14 | 6.37E-13 | LRMP       |
| ENSG00000205339 | 1626.466867 | 4826.130697 | -1.569163836 | 3.55E-14 | 6.38E-13 | IPO7       |
| ENSG00000173391 | 1805.778207 | 16.39138515 | 6.775634904  | 3.55E-14 | 6.38E-13 | OLR1       |
| ENSG00000160752 | 493.3630292 | 1315.11458  | -1.414383224 | 3.55E-14 | 6.39E-13 | FDPS       |
| ENSG00000154102 | 13.11832503 | 252.3695356 | -4.268002411 | 3.57E-14 | 6.42E-13 | C16orf74   |
| ENSG00000204161 | 203.6188092 | 0           | 10.00326755  | 3.61E-14 | 6.48E-13 | TMEM273    |
| ENSG00000231313 | 37.6343222  | 182.9873042 | -2.282212014 | 3.62E-14 | 6.48E-13 | CLIC1P1    |
| ENSG00000171444 | 1302.795598 | 325.9144564 | 1.999127831  | 3.78E-14 | 6.77E-13 | MCC        |
| ENSG00000182557 | 162.6174319 | 0           | 9.678827415  | 3.80E-14 | 6.81E-13 | SPNS3      |
| ENSG00000107833 | 154.0893436 | 852.4568395 | -2.46847123  | 3.94E-14 | 7.04E-13 | NPM3       |
| ENSG00000182700 | 1125.844063 | 218.9754111 | 2.363468682  | 3.98E-14 | 7.12E-13 | IGIP       |
| ENSG00000130762 | 670.6082584 | 32.30910877 | 4.371376543  | 4.16E-14 | 7.44E-13 | ARHGEF16   |
| ENSG00000157827 | 3359.747038 | 804.7477149 | 2.061710372  | 4.18E-14 | 7.47E-13 | FMNL2      |
| ENSG00000204628 | 9674.408938 | 23848.85983 | -1.301671234 | 4.19E-14 | 7.47E-13 | RACK1      |
| ENSG00000246430 | 542.186108  | 6.553481185 | 6.354191009  | 4.26E-14 | 7.60E-13 | LINC00968  |
| ENSG00000143036 | 87.51824498 | 7.490786892 | 3.540799235  | 4.30E-14 | 7.67E-13 | SLC44A3    |
| ENSG00000092929 | 532.8539842 | 38.7114938  | 3.776958367  | 4.31E-14 | 7.68E-13 | UNC13D     |
| ENSG00000157303 | 265.4266401 | 14.95333235 | 4.136642697  | 4.33E-14 | 7.70E-13 | SUSD3      |
| ENSG00000177868 | 379.5775756 | 104.9051185 | 1.85544829   | 4.46E-14 | 7.92E-13 | SVBP       |
| ENSG00000114790 | 133.0519064 | 3.944309986 | 5.075527123  | 4.47E-14 | 7.93E-13 | ARHGEF26   |
| ENSG00000172794 | 127.9731155 | 0           | 9.333286794  | 4.70E-14 | 8.34E-13 | RAB37      |
| ENSG00000106624 | 5511.923278 | 1971.674329 | 1.483058527  | 4.73E-14 | 8.39E-13 | AEBP1      |
| ENSG00000170266 | 586.0323766 | 2116.857158 | -1.852881712 | 4.79E-14 | 8.49E-13 | GLB1       |
| ENSG00000167208 | 225.8136247 | 0           | 10.15253641  | 4.89E-14 | 8.67E-13 | SNX20      |
| ENSG00000160460 | 442.5188066 | 20.71662278 | 4.425194124  | 4.96E-14 | 8.78E-13 | SPTBN4     |
| ENSG00000183960 | 296.1062398 | 0           | 10.54386082  | 5.05E-14 | 8.95E-13 | KCNH8      |
| ENSG00000136231 | 16.93894686 | 892.8318467 | -5.716688777 | 5.07E-14 | 8.96E-13 | IGF2BP3    |
| ENSG00000112561 | 858.6150131 | 115.0693123 | 2.89711459   | 5.08E-14 | 8.97E-13 | TFEB       |
| ENSG00000120438 | 2039.04072  | 6152.524574 | -1.593353004 | 5.08E-14 | 8.97E-13 | TCP1       |
| ENSG00000161654 | 197.6784611 | 564.075926  | -1.512478312 | 5.08E-14 | 8.97E-13 | LSM12      |
| ENSG00000198894 | 708.5016301 | 196.823946  | 1.848090999  | 5.09E-14 | 8.98E-13 | CIPC       |
| ENSG00000125835 | 1030.909321 | 3218.380355 | -1.642465863 | 5.10E-14 | 8.98E-13 | SNRPB      |
| ENSG00000100365 | 181.6137511 | 0           | 9.838225253  | 5.13E-14 | 9.03E-13 | NCF4       |
| ENSG00000239332 | 16.31499789 | 295.0905898 | -4.175465198 | 5.15E-14 | 9.07E-13 | LINC01119  |
| ENSG00000119203 | 416.1915242 | 1174.616714 | -1.496981361 | 5.18E-14 | 9.12E-13 | CPSF3      |
| ENSG00000089159 | 993.1288361 | 2952.287357 | -1.5716482   | 5.27E-14 | 9.27E-13 | PXN        |

|                 |             |             |              |          |          |            |
|-----------------|-------------|-------------|--------------|----------|----------|------------|
| ENSG0000058056  | 274.3704006 | 796.4461674 | -1.537798971 | 5.29E-14 | 9.30E-13 | USP13      |
| ENSG00000106853 | 295.4849084 | 1939.682435 | -2.714862205 | 5.31E-14 | 9.32E-13 | PTGR1      |
| ENSG00000166508 | 1126.92859  | 4801.695607 | -2.0911506   | 5.32E-14 | 9.34E-13 | MCM7       |
| ENSG00000227082 | 207.1473733 | 0.713078025 | 8.1730302    | 5.34E-14 | 9.37E-13 | AC244021.1 |
| ENSG00000100353 | 1857.346022 | 5156.993161 | -1.473280908 | 5.52E-14 | 9.68E-13 | EIF3D      |
| ENSG00000092445 | 1032.793263 | 385.4461293 | 1.422085759  | 5.67E-14 | 9.93E-13 | TYRO3      |
| ENSG00000061918 | 167.8429001 | 16.66276749 | 3.325347635  | 5.76E-14 | 1.01E-12 | GUCY1B1    |
| ENSG00000167721 | 460.457229  | 1605.261912 | -1.801972878 | 6.05E-14 | 1.06E-12 | TSR1       |
| novel.379       | 261.823898  | 17.07822952 | 3.94312418   | 6.11E-14 | 1.07E-12 | -          |
| ENSG00000162496 | 6428.029976 | 1102.86879  | 2.543128329  | 6.13E-14 | 1.07E-12 | DHRS3      |
| ENSG00000053918 | 155.0937472 | 0           | 9.610453384  | 6.24E-14 | 1.09E-12 | KCNQ1      |
| ENSG00000105605 | 1.50778846  | 559.1363298 | -8.531663955 | 6.35E-14 | 1.11E-12 | CACNG7     |
| ENSG00000109089 | 303.8373864 | 1475.418066 | -2.279803698 | 6.42E-14 | 1.12E-12 | CDR2L      |
| ENSG00000147113 | 149.2374924 | 0           | 9.554912775  | 6.42E-14 | 1.12E-12 | DIPK2B     |
| ENSG00000116062 | 571.6162375 | 1703.879747 | -1.575637982 | 6.89E-14 | 1.20E-12 | MSH6       |
| ENSG00000157551 | 2.461832635 | 358.8171024 | -7.19719653  | 7.01E-14 | 1.22E-12 | KCNJ15     |
| ENSG00000255389 | 186.3786174 | 9.161368115 | 4.336007094  | 7.06E-14 | 1.23E-12 | Z97989.1   |
| ENSG00000105185 | 789.308899  | 2338.581294 | -1.566946643 | 7.12E-14 | 1.24E-12 | PDCD5      |
| ENSG00000110328 | 588.8856345 | 23.68934946 | 4.642351905  | 7.24E-14 | 1.26E-12 | GALNT18    |
| ENSG00000277196 | 162.2052523 | 1.029478846 | 7.244523625  | 7.27E-14 | 1.26E-12 | AC007325.2 |
| ENSG00000258227 | 419.4900759 | 0           | 11.04633454  | 7.30E-14 | 1.27E-12 | CLEC5A     |
| ENSG00000256663 | 9.930142978 | 178.3149029 | -4.163792119 | 7.31E-14 | 1.27E-12 | AC112777.1 |
| ENSG00000102900 | 498.0255065 | 1571.640444 | -1.658253382 | 7.49E-14 | 1.30E-12 | NUP93      |
| ENSG00000073008 | 347.4334136 | 2003.214334 | -2.52770425  | 7.57E-14 | 1.31E-12 | PVR        |
| ENSG00000162873 | 401.4253992 | 1.00940975  | 8.569855505  | 7.64E-14 | 1.32E-12 | KLHDC8A    |
| ENSG00000118407 | 221.4593181 | 1.130980201 | 7.669122745  | 7.94E-14 | 1.37E-12 | FILIP1     |
| ENSG00000077063 | 171.4382201 | 2.406040094 | 6.115863625  | 8.07E-14 | 1.39E-12 | CTTNBP2    |
| ENSG00000180828 | 165.6681121 | 1.130980201 | 7.254443893  | 8.59E-14 | 1.48E-12 | BHLHE22    |
| ENSG00000178685 | 2746.225488 | 664.1682196 | 2.04744185   | 8.69E-14 | 1.50E-12 | PARP10     |
| ENSG00000109685 | 972.1808074 | 3323.98632  | -1.773482243 | 8.85E-14 | 1.52E-12 | NSD2       |
| ENSG00000197785 | 341.5301322 | 1759.691646 | -2.36547062  | 8.89E-14 | 1.53E-12 | ATAD3A     |
| ENSG00000084623 | 1762.22504  | 5042.310196 | -1.516706818 | 8.90E-14 | 1.53E-12 | EIF3I      |
| ENSG00000196407 | 93.73070823 | 7.235749235 | 3.702242031  | 9.04E-14 | 1.55E-12 | THEM5      |
| ENSG00000196924 | 12883.02463 | 43088.92507 | -1.741842595 | 9.13E-14 | 1.57E-12 | FLNA       |
| ENSG00000148848 | 54.51219557 | 1299.919039 | -4.576682926 | 9.34E-14 | 1.60E-12 | ADAM12     |
| ENSG00000170606 | 1320.967094 | 4073.587041 | -1.624803746 | 9.37E-14 | 1.61E-12 | HSPA4      |
| ENSG00000231999 | 195.419721  | 20.16666606 | 3.278355925  | 9.80E-14 | 1.68E-12 | LRRRC8-DT  |
| ENSG00000134668 | 33.03731936 | 1634.551377 | -5.626998982 | 9.81E-14 | 1.68E-12 | SPOCD1     |
| ENSG00000182919 | 480.0800479 | 147.2346325 | 1.706555882  | 9.85E-14 | 1.69E-12 | C11orf54   |
| ENSG00000151849 | 157.6475676 | 531.259824  | -1.752224822 | 9.87E-14 | 1.69E-12 | CENPJ      |
| ENSG00000123562 | 3086.06038  | 7686.61539  | -1.31662496  | 1.04E-13 | 1.77E-12 | MORF4L2    |
| ENSG00000166794 | 2095.692573 | 6226.051183 | -1.57089979  | 1.05E-13 | 1.79E-12 | PPIB       |
| ENSG00000242247 | 617.3222186 | 1615.35553  | -1.387808097 | 1.07E-13 | 1.83E-12 | ARFGAP3    |
| ENSG00000232024 | 71.16033795 | 290.4224734 | -2.028906395 | 1.08E-13 | 1.85E-12 | LSM12P1    |
| ENSG00000245025 | 118.8873081 | 11.92266295 | 3.322534489  | 1.09E-13 | 1.86E-12 | AC107959.1 |
| ENSG00000166451 | 78.55099299 | 457.2001014 | -2.542061077 | 1.09E-13 | 1.86E-12 | CENPN      |
| ENSG00000092853 | 20.02515573 | 652.2276915 | -5.023194347 | 1.09E-13 | 1.86E-12 | CLSPN      |
| ENSG00000286473 | 117.9926127 | 0           | 9.216116659  | 1.11E-13 | 1.89E-12 | AC133485.7 |
| ENSG00000113407 | 1019.942164 | 3047.60576  | -1.579315175 | 1.11E-13 | 1.89E-12 | TARS       |
| ENSG00000165280 | 3692.042149 | 11218.27701 | -1.60338608  | 1.12E-13 | 1.91E-12 | VCP        |
| novel.259       | 178.9757659 | 0           | 9.817123174  | 1.12E-13 | 1.91E-12 | -          |

|                 |             |             |              |          |          |           |
|-----------------|-------------|-------------|--------------|----------|----------|-----------|
| ENSG00000144040 | 1040.647857 | 297.9699999 | 1.804523226  | 1.13E-13 | 1.92E-12 | SFXN5     |
| ENSG00000168393 | 358.1933893 | 1722.488524 | -2.265863992 | 1.15E-13 | 1.94E-12 | DTYMK     |
| ENSG00000149970 | 216.2854945 | 1.049547942 | 7.657594054  | 1.15E-13 | 1.95E-12 | CNKSR2    |
| novel.494       | 0           | 129.22316   | -9.593740696 | 1.16E-13 | 1.96E-12 | -         |
| ENSG00000239264 | 32.20218654 | 348.2916767 | -3.435876693 | 1.17E-13 | 1.98E-12 | TXNDC5    |
| ENSG00000116221 | 722.4019198 | 2252.446866 | -1.640771943 | 1.18E-13 | 2.00E-12 | MRPL37    |
| ENSG00000206053 | 817.7716672 | 2588.708344 | -1.662377095 | 1.21E-13 | 2.04E-12 | JPT2      |
| ENSG00000198740 | 721.9338947 | 234.8889436 | 1.620945084  | 1.24E-13 | 2.09E-12 | ZNF652    |
| ENSG00000171314 | 2215.20176  | 10915.89276 | -2.300955699 | 1.25E-13 | 2.11E-12 | PGAM1     |
| ENSG00000167775 | 337.4149168 | 1677.778562 | -2.314031559 | 1.25E-13 | 2.11E-12 | CD320     |
| ENSG00000009950 | 403.3557857 | 5.359725157 | 6.264716786  | 1.25E-13 | 2.11E-12 | MLXIPL    |
| novel.777       | 5.196776466 | 269.8245742 | -5.703460296 | 1.25E-13 | 2.11E-12 | -         |
| ENSG00000132334 | 1543.746312 | 299.6062567 | 2.366381024  | 1.27E-13 | 2.13E-12 | PTPRE     |
| ENSG00000168439 | 1661.504347 | 5969.848359 | -1.84527535  | 1.27E-13 | 2.13E-12 | STIP1     |
| ENSG00000130032 | 261.3273787 | 0           | 10.36331338  | 1.28E-13 | 2.15E-12 | PRRG3     |
| ENSG00000203685 | 162.6995049 | 0           | 9.680099938  | 1.30E-13 | 2.18E-12 | STUM      |
| ENSG00000101846 | 1504.435412 | 264.9053288 | 2.504787292  | 1.31E-13 | 2.19E-12 | STS       |
| ENSG00000196396 | 686.2236294 | 2187.674548 | -1.67263061  | 1.31E-13 | 2.20E-12 | PTPN1     |
| ENSG00000258733 | 82.15018831 | 3.159256312 | 4.676821949  | 1.33E-13 | 2.24E-12 | LINC02328 |
| ENSG00000148843 | 526.3733381 | 2009.2358   | -1.932547252 | 1.33E-13 | 2.24E-12 | PDCD11    |
| ENSG00000166949 | 950.7528965 | 2675.644191 | -1.492755323 | 1.34E-13 | 2.24E-12 | SMAD3     |
| ENSG00000101811 | 171.2938085 | 566.7433439 | -1.726607944 | 1.34E-13 | 2.25E-12 | CSTF2     |
| ENSG00000164694 | 296.9917551 | 3.658590747 | 6.355232551  | 1.38E-13 | 2.31E-12 | FNDC1     |
| ENSG00000029993 | 216.5499133 | 1367.113637 | -2.658822427 | 1.39E-13 | 2.32E-12 | HMGB3     |
| ENSG00000166189 | 291.3728132 | 915.1644857 | -1.65145443  | 1.39E-13 | 2.33E-12 | HPS6      |
| ENSG00000263465 | 1778.814248 | 626.2038927 | 1.50589242   | 1.40E-13 | 2.34E-12 | SRSF8     |
| ENSG00000088827 | 492.2061454 | 0.693008929 | 9.431904249  | 1.40E-13 | 2.34E-12 | SIGLEC1   |
| ENSG00000197062 | 467.1953302 | 136.7203683 | 1.774226279  | 1.42E-13 | 2.37E-12 | ZSCAN26   |
| ENSG00000000938 | 126.0811108 | 2.629111901 | 5.628054477  | 1.44E-13 | 2.40E-12 | FGR       |
| ENSG00000075388 | 255.26202   | 0           | 10.32942659  | 1.44E-13 | 2.40E-12 | FGF4      |
| ENSG00000183763 | 41.06245076 | 214.1193056 | -2.381554349 | 1.44E-13 | 2.40E-12 | TRAIP     |
| ENSG00000135454 | 792.3715889 | 66.50758539 | 3.57772601   | 1.46E-13 | 2.44E-12 | B4GALNT1  |
| ENSG00000102383 | 117.4158755 | 3.404837359 | 5.05976736   | 1.48E-13 | 2.47E-12 | ZDHHC15   |
| ENSG00000221963 | 1018.233477 | 314.4865515 | 1.694676448  | 1.49E-13 | 2.48E-12 | APOL6     |
| ENSG00000072657 | 22.757877   | 367.1974921 | -4.01226378  | 1.49E-13 | 2.48E-12 | TRHDE     |
| ENSG00000169245 | 362.1041005 | 12.34056513 | 4.878760555  | 1.50E-13 | 2.49E-12 | CXCL10    |
| ENSG00000117091 | 216.4319264 | 0           | 10.09132155  | 1.51E-13 | 2.51E-12 | CD48      |
| ENSG00000175287 | 338.6616045 | 31.65623803 | 3.413584644  | 1.52E-13 | 2.53E-12 | PHYHD1    |
| ENSG00000110660 | 61.20304198 | 617.9856912 | -3.336640011 | 1.54E-13 | 2.55E-12 | SLC35F2   |
| ENSG00000141655 | 215.4974156 | 14.41830765 | 3.915258431  | 1.55E-13 | 2.56E-12 | TNFRSF11A |
| ENSG00000164934 | 395.1928357 | 1195.096522 | -1.596827619 | 1.58E-13 | 2.61E-12 | DCAF13    |
| ENSG00000163378 | 183.0723347 | 564.8369762 | -1.625497301 | 1.58E-13 | 2.62E-12 | EOGT      |
| ENSG00000213585 | 2476.845051 | 7782.254262 | -1.651677156 | 1.59E-13 | 2.63E-12 | VDAC1     |
| ENSG00000263528 | 102.0686407 | 547.0637987 | -2.421825602 | 1.59E-13 | 2.63E-12 | IKBKE     |
| ENSG00000113240 | 1321.317553 | 306.4348103 | 2.108387346  | 1.61E-13 | 2.65E-12 | CLK4      |
| ENSG00000179256 | 113.9181552 | 0           | 9.165786371  | 1.63E-13 | 2.68E-12 | SMCO3     |
| ENSG00000170802 | 886.9441815 | 264.4193382 | 1.746020845  | 1.64E-13 | 2.71E-12 | FOXN2     |
| ENSG00000168495 | 441.600564  | 1219.510671 | -1.465602376 | 1.70E-13 | 2.80E-12 | POLR3D    |
| ENSG00000104833 | 292.8479518 | 0.356539013 | 9.566140572  | 1.70E-13 | 2.80E-12 | TUBB4A    |
| ENSG00000135363 | 1076.572888 | 41.14949974 | 4.704758817  | 1.87E-13 | 3.07E-12 | LMO2      |
| ENSG00000167747 | 300.5974918 | 1463.390896 | -2.283542963 | 1.88E-13 | 3.10E-12 | C19orf48  |

|                 |             |             |              |          |          |            |
|-----------------|-------------|-------------|--------------|----------|----------|------------|
| ENSG00000115602 | 3.240764379 | 367.2715608 | -6.810209108 | 1.89E-13 | 3.11E-12 | IL1RL1     |
| ENSG00000135097 | 125.8573198 | 1.00940975  | 6.879114931  | 1.90E-13 | 3.12E-12 | MSI1       |
| ENSG00000126217 | 380.642341  | 6.789605622 | 5.784627471  | 1.90E-13 | 3.12E-12 | MCF2L      |
| ENSG00000114850 | 1912.226417 | 8607.970768 | -2.1704705   | 1.95E-13 | 3.20E-12 | SSR3       |
| ENSG00000182389 | 292.3383418 | 4.077777192 | 6.13101521   | 1.95E-13 | 3.20E-12 | CACNB4     |
| novel.390       | 139.4076416 | 0           | 9.456655914  | 1.95E-13 | 3.20E-12 | -          |
| ENSG00000184432 | 1765.716518 | 6797.13303  | -1.944692881 | 2.00E-13 | 3.27E-12 | COPB2      |
| ENSG00000070814 | 754.3933657 | 2059.139658 | -1.448509953 | 2.00E-13 | 3.28E-12 | TCOF1      |
| ENSG00000152953 | 112.0743593 | 5.278421292 | 4.391621052  | 2.10E-13 | 3.44E-12 | STK32B     |
| ENSG00000108924 | 372.5590529 | 1.161661783 | 8.399747559  | 2.11E-13 | 3.46E-12 | HLF        |
| ENSG00000136848 | 1280.630311 | 432.8885843 | 1.565371127  | 2.13E-13 | 3.48E-12 | DAB2IP     |
| ENSG00000111452 | 777.5833157 | 2.395427609 | 8.315544911  | 2.13E-13 | 3.48E-12 | ADGRD1     |
| ENSG00000162174 | 102.184689  | 9.599339387 | 3.404283946  | 2.19E-13 | 3.57E-12 | ASRGL1     |
| novel.154       | 111.2266187 | 2.272572888 | 5.670006241  | 2.19E-13 | 3.57E-12 | -          |
| ENSG00000204789 | 188.0493941 | 8.325435369 | 4.502018492  | 2.23E-13 | 3.63E-12 | ZNF204P    |
| ENSG00000078269 | 122.0337631 | 938.873609  | -2.943667395 | 2.23E-13 | 3.63E-12 | SYNJ2      |
| ENSG00000152154 | 265.6192049 | 33.62747051 | 2.988075076  | 2.26E-13 | 3.67E-12 | TMEM178A   |
| ENSG00000121858 | 410.6366134 | 8.010318817 | 5.667687621  | 2.26E-13 | 3.67E-12 | TNFSF10    |
| ENSG00000169247 | 787.7551695 | 118.8832715 | 2.728369039  | 2.28E-13 | 3.71E-12 | SH3TC2     |
| ENSG00000163902 | 3318.810012 | 9001.609846 | -1.439505634 | 2.29E-13 | 3.71E-12 | RPN1       |
| ENSG00000131981 | 5054.169358 | 1184.473449 | 2.093145705  | 2.32E-13 | 3.76E-12 | LGALS3     |
| ENSG00000120659 | 0           | 112.1048392 | -9.390992124 | 2.34E-13 | 3.79E-12 | TNFSF11    |
| ENSG00000138039 | 280.5603107 | 0           | 10.46578288  | 2.36E-13 | 3.82E-12 | LHCGR      |
| ENSG00000089220 | 11062.85313 | 4473.140917 | 1.306330904  | 2.36E-13 | 3.82E-12 | PEBP1      |
| ENSG00000172817 | 1688.684777 | 136.5314925 | 3.626999983  | 2.38E-13 | 3.85E-12 | CYP7B1     |
| ENSG00000157600 | 259.9308958 | 862.8796756 | -1.731011809 | 2.41E-13 | 3.90E-12 | TMEM164    |
| ENSG00000173706 | 543.2134859 | 3079.049396 | -2.503083242 | 2.42E-13 | 3.92E-12 | HEG1       |
| ENSG00000214960 | 152.7723243 | 31.10358438 | 2.293802902  | 2.43E-13 | 3.92E-12 | CRPPA      |
| ENSG00000158825 | 14.06484731 | 350.2727992 | -4.640665994 | 2.48E-13 | 4.00E-12 | CDA        |
| ENSG00000129003 | 2775.189054 | 644.1487234 | 2.107095894  | 2.48E-13 | 4.00E-12 | VPS13C     |
| ENSG00000136542 | 224.459823  | 1241.843926 | -2.468423156 | 2.51E-13 | 4.05E-12 | GALNT5     |
| ENSG00000230438 | 182.1338329 | 16.41962659 | 3.458031243  | 2.52E-13 | 4.06E-12 | SERPINB9P1 |
| ENSG00000156787 | 62.24190734 | 268.113538  | -2.106810026 | 2.52E-13 | 4.06E-12 | TBC1D31    |
| ENSG00000176896 | 120.9842278 | 17.78429108 | 2.759894964  | 2.59E-13 | 4.16E-12 | TCEANC     |
| ENSG00000203727 | 1005.641607 | 18.1846927  | 5.781084538  | 2.62E-13 | 4.22E-12 | SAMD5      |
| ENSG00000117480 | 212.2856711 | 20.91158154 | 3.345953355  | 2.65E-13 | 4.27E-12 | FAAH       |
| ENSG00000138166 | 168.6001631 | 2454.588375 | -3.86398528  | 2.66E-13 | 4.28E-12 | DUSP5      |
| ENSG00000131044 | 116.499113  | 1.396630344 | 6.349530749  | 2.75E-13 | 4.41E-12 | TTLL9      |
| ENSG00000167261 | 160.9693485 | 1.682349583 | 6.514719229  | 2.75E-13 | 4.41E-12 | DPEP2      |
| ENSG00000113739 | 229.4141439 | 16235.37087 | -6.145175982 | 2.83E-13 | 4.54E-12 | STC2       |
| ENSG00000163931 | 3134.139211 | 9008.937687 | -1.523294118 | 2.86E-13 | 4.58E-12 | TKT        |
| ENSG00000186638 | 22.25037553 | 164.6498927 | -2.885133527 | 3.08E-13 | 4.93E-12 | KIF24      |
| ENSG00000234743 | 39.56232673 | 219.05856   | -2.467835137 | 3.12E-13 | 5.00E-12 | EIF5AP4    |
| ENSG00000081818 | 133.9691393 | 0           | 9.399878496  | 3.13E-13 | 5.01E-12 | PCDHB4     |
| ENSG00000270419 | 186.0471823 | 22.24684872 | 3.063851585  | 3.25E-13 | 5.19E-12 | CAHM       |
| ENSG00000180881 | 176.2699849 | 22.87032215 | 2.936379031  | 3.28E-13 | 5.24E-12 | CAPS2      |
| ENSG00000102144 | 3028.32615  | 16589.24652 | -2.453651613 | 3.32E-13 | 5.31E-12 | PGK1       |
| ENSG00000112280 | 266.4769906 | 0           | 10.39175517  | 3.52E-13 | 5.61E-12 | COL9A1     |
| ENSG00000223768 | 322.1009179 | 953.5702249 | -1.56610875  | 3.53E-13 | 5.63E-12 | LINC00205  |
| ENSG00000148335 | 218.3427087 | 929.7914464 | -2.090848664 | 3.57E-13 | 5.69E-12 | NTMT1      |
| ENSG00000228305 | 97.93909345 | 367.5455332 | -1.907928847 | 3.57E-13 | 5.69E-12 | AC016734.1 |



|                 |             |             |              |          |          |            |
|-----------------|-------------|-------------|--------------|----------|----------|------------|
| ENSG00000140553 | 884.2932596 | 2358.517368 | -1.415167892 | 3.62E-13 | 5.76E-12 | UNC45A     |
| ENSG00000100036 | 89.65757557 | 367.560932  | -2.034224751 | 3.63E-13 | 5.78E-12 | SLC35E4    |
| ENSG00000172578 | 218.5336197 | 0.336469917 | 9.143498401  | 3.65E-13 | 5.81E-12 | KLHL6      |
| ENSG00000198380 | 834.1785493 | 2871.979085 | -1.783632873 | 3.69E-13 | 5.86E-12 | GFPT1      |
| ENSG00000099785 | 1179.571532 | 378.7809194 | 1.638751026  | 3.87E-13 | 6.14E-12 | 2-Mar      |
| ENSG00000167074 | 717.4486095 | 119.9676922 | 2.582432383  | 3.95E-13 | 6.27E-12 | TEF        |
| ENSG00000187391 | 471.7858795 | 61.80959247 | 2.928880125  | 4.01E-13 | 6.36E-12 | MAGI2      |
| ENSG00000157916 | 1314.248255 | 3342.337432 | -1.346655145 | 4.05E-13 | 6.42E-12 | RER1       |
| ENSG00000108846 | 74.04815671 | 2538.252787 | -5.098688523 | 4.10E-13 | 6.49E-12 | ABCC3      |
| ENSG00000225733 | 6159.126857 | 2357.179822 | 1.385675018  | 4.13E-13 | 6.54E-12 | FGD5-AS1   |
| ENSG00000100345 | 8075.164319 | 40933.25205 | -2.341707978 | 4.15E-13 | 6.56E-12 | MYH9       |
| ENSG00000130816 | 1288.864704 | 3659.77226  | -1.505601555 | 4.21E-13 | 6.65E-12 | DNMT1      |
| ENSG00000165283 | 934.9583927 | 2931.233815 | -1.648666402 | 4.33E-13 | 6.85E-12 | STOML2     |
| ENSG00000197776 | 351.2769723 | 41.40384825 | 3.090453555  | 4.35E-13 | 6.87E-12 | KLHDC1     |
| ENSG00000026559 | 59.71448553 | 1831.546702 | -4.939495731 | 4.46E-13 | 7.03E-12 | KCNG1      |
| ENSG00000154319 | 0.308355904 | 263.2401633 | -9.659027988 | 4.49E-13 | 7.08E-12 | FAM167A    |
| ENSG00000259969 | 86.60710995 | 1.874739808 | 5.581731603  | 4.50E-13 | 7.09E-12 | AL049838.1 |
| ENSG00000064042 | 3588.4982   | 36.12264848 | 6.631284743  | 4.50E-13 | 7.09E-12 | LIMCH1     |
| ENSG00000188677 | 156.2259528 | 822.9693012 | -2.397626911 | 4.53E-13 | 7.13E-12 | PARVB      |
| ENSG00000118705 | 3030.096011 | 7631.758583 | -1.332665927 | 4.55E-13 | 7.16E-12 | RPN2       |
| ENSG00000133321 | 483.2385255 | 43.1115324  | 3.481624501  | 4.57E-13 | 7.19E-12 | PLAAT4     |
| ENSG00000197299 | 26.35345356 | 235.1556681 | -3.158305645 | 4.60E-13 | 7.23E-12 | BLM        |
| ENSG00000064102 | 389.2705366 | 1124.327315 | -1.530017961 | 4.65E-13 | 7.30E-12 | INTS13     |
| ENSG00000104321 | 2.140868972 | 210.1872178 | -6.624276798 | 4.68E-13 | 7.34E-12 | TRPA1      |
| ENSG00000184144 | 374.0031402 | 0.387220594 | 9.919005899  | 4.69E-13 | 7.36E-12 | CNTN2      |
| ENSG00000157502 | 2.152223082 | 153.913327  | -6.173697648 | 4.85E-13 | 7.61E-12 | PWWP3B     |
| ENSG00000279675 | 112.7336242 | 0           | 9.150832083  | 5.15E-13 | 8.07E-12 | AC080100.1 |
| ENSG00000160886 | 15.68478068 | 1217.004136 | -6.280083676 | 5.18E-13 | 8.12E-12 | LY6K       |
| ENSG00000122140 | 353.0996975 | 892.7540361 | -1.338024227 | 5.34E-13 | 8.36E-12 | MRPS2      |
| ENSG00000129295 | 182.7322103 | 36.77983875 | 2.310520658  | 5.54E-13 | 8.67E-12 | LRRC6      |
| ENSG00000161647 | 49.17533827 | 263.3858781 | -2.419708597 | 5.63E-13 | 8.80E-12 | MPP3       |
| ENSG00000164588 | 281.3056074 | 0           | 10.4696176   | 5.84E-13 | 9.13E-12 | HCN1       |
| ENSG00000204282 | 173.6456472 | 0.713078025 | 7.91871968   | 5.93E-13 | 9.26E-12 | TNRC6C-AS1 |
| ENSG00000184454 | 1979.358773 | 0           | 13.28451785  | 6.15E-13 | 9.59E-12 | NCMAP      |
| ENSG00000128342 | 103.2943998 | 1871.912429 | -4.17960111  | 6.20E-13 | 9.66E-12 | LIF        |
| ENSG00000166676 | 178.2816716 | 6.205114513 | 4.854896918  | 6.22E-13 | 9.69E-12 | TVP23A     |
| ENSG00000164938 | 1342.015033 | 402.6276108 | 1.736811402  | 6.37E-13 | 9.92E-12 | TP53INP1   |
| ENSG00000033100 | 1078.468201 | 4296.934243 | -1.994256497 | 6.49E-13 | 1.01E-11 | CHPF2      |
| ENSG00000186174 | 327.2109347 | 2901.919215 | -3.148795267 | 6.50E-13 | 1.01E-11 | BCL9L      |
| ENSG00000179364 | 3473.831654 | 1148.500938 | 1.596951616  | 6.54E-13 | 1.02E-11 | PACS2      |
| ENSG00000145147 | 4111.520005 | 107.3678639 | 5.257551009  | 6.80E-13 | 1.06E-11 | SLIT2      |
| ENSG00000120278 | 300.4894483 | 17.45971792 | 4.095752911  | 6.94E-13 | 1.08E-11 | PLEKHG1    |
| ENSG00000105509 | 2.113146158 | 520.817796  | -7.943851178 | 6.96E-13 | 1.08E-11 | HAS1       |
| ENSG00000128059 | 166.0645794 | 588.7286861 | -1.82647965  | 7.03E-13 | 1.09E-11 | PPAT       |
| ENSG00000149380 | 17.20474962 | 230.9505882 | -3.746210318 | 7.05E-13 | 1.09E-11 | P4HA3      |
| ENSG00000151835 | 469.4215186 | 1709.784591 | -1.864682624 | 7.08E-13 | 1.10E-11 | SACS       |
| ENSG00000122679 | 130.8087785 | 0           | 9.364854564  | 7.21E-13 | 1.12E-11 | RAMP3      |
| ENSG00000174004 | 237.5699138 | 31.31707118 | 2.928665172  | 7.23E-13 | 1.12E-11 | NRROS      |
| ENSG00000082397 | 3731.565038 | 1349.005809 | 1.468058141  | 7.27E-13 | 1.12E-11 | EPB41L3    |
| ENSG00000161911 | 154.6278459 | 0           | 9.606745874  | 7.28E-13 | 1.12E-11 | TREML1     |
| ENSG00000123124 | 3213.347503 | 636.5141955 | 2.336115307  | 7.34E-13 | 1.13E-11 | WWP1       |

|                 |             |             |              |          |          |            |
|-----------------|-------------|-------------|--------------|----------|----------|------------|
| ENSG00000174899 | 2.137108026 | 81.92730603 | -5.268625902 | 7.35E-13 | 1.14E-11 | PQLC2L     |
| ENSG00000150995 | 1377.5207   | 210.772141  | 2.708992899  | 7.63E-13 | 1.18E-11 | ITPR1      |
| ENSG00000188352 | 391.5218692 | 1009.554428 | -1.366445057 | 7.70E-13 | 1.19E-11 | FOCAD      |
| ENSG00000283994 | 119.0047246 | 0           | 9.229023041  | 7.90E-13 | 1.22E-11 | AC092652.3 |
| ENSG00000260257 | 240.6544146 | 29.85090533 | 3.012266719  | 7.93E-13 | 1.22E-11 | AL035071.1 |
| ENSG00000108342 | 2.082916045 | 27408.47356 | -13.67990202 | 7.95E-13 | 1.22E-11 | CSF3       |
| novel.194       | 228.1018161 | 0           | 10.16749746  | 8.05E-13 | 1.24E-11 | -          |
| ENSG00000164104 | 1051.172742 | 3405.910012 | -1.696103761 | 8.12E-13 | 1.25E-11 | HMGB2      |
| ENSG00000287115 | 100.5457375 | 3.892403433 | 4.677990432  | 8.28E-13 | 1.27E-11 | AC009951.3 |
| ENSG00000012174 | 301.1576035 | 1024.423887 | -1.7666499   | 8.32E-13 | 1.28E-11 | MBTPS2     |
| ENSG00000106628 | 937.2548577 | 2788.42236  | -1.573003479 | 8.40E-13 | 1.29E-11 | POLD2      |
| ENSG00000260855 | 176.2581047 | 10.33479826 | 4.088970582  | 8.53E-13 | 1.31E-11 | AL591848.4 |
| ENSG00000178882 | 493.1675838 | 18.45581825 | 4.746872061  | 8.59E-13 | 1.32E-11 | RFLNA      |
| ENSG00000197841 | 434.5294768 | 125.0376825 | 1.795929838  | 8.62E-13 | 1.32E-11 | ZNF181     |
| ENSG00000051596 | 217.5073346 | 589.1462503 | -1.437608242 | 8.89E-13 | 1.36E-11 | THOC3      |
| ENSG00000172322 | 279.1373424 | 0           | 10.45844872  | 8.90E-13 | 1.36E-11 | CLEC12A    |
| ENSG00000106367 | 685.5563722 | 2774.19667  | -2.016696633 | 9.03E-13 | 1.38E-11 | AP1S1      |
| ENSG00000165816 | 118.0142533 | 2.211209725 | 5.764985908  | 9.18E-13 | 1.40E-11 | VWA2       |
| ENSG00000107815 | 164.3649538 | 482.2885557 | -1.553339736 | 9.22E-13 | 1.41E-11 | TWINK      |
| ENSG00000137474 | 179.8791384 | 0.336469917 | 8.863032274  | 9.38E-13 | 1.43E-11 | MYO7A      |
| ENSG00000163531 | 1164.022179 | 11.66634103 | 6.649966522  | 9.39E-13 | 1.43E-11 | NFASC      |
| ENSG00000152213 | 108.9447709 | 1.049547942 | 6.664381219  | 9.42E-13 | 1.44E-11 | ARL11      |
| ENSG00000154277 | 2044.814971 | 6984.656673 | -1.772274092 | 9.44E-13 | 1.44E-11 | UCHL1      |
| ENSG00000078579 | 105.1641949 | 1.487519214 | 6.185156256  | 9.48E-13 | 1.44E-11 | FGF20      |
| ENSG00000183833 | 129.1484161 | 3.302051734 | 5.309121119  | 9.49E-13 | 1.44E-11 | MAATS1     |
| ENSG00000164116 | 168.6873349 | 2.038888596 | 6.320577979  | 9.55E-13 | 1.45E-11 | GUCY1A1    |
| ENSG00000164576 | 1174.755066 | 375.4784825 | 1.645643988  | 9.67E-13 | 1.47E-11 | SAP30L     |
| ENSG00000197536 | 218.6315479 | 52.06360485 | 2.070259914  | 9.96E-13 | 1.51E-11 | C5orf56    |
| novel.41        | 165.5768516 | 0.387220594 | 8.74332178   | 1.05E-12 | 1.59E-11 | -          |
| ENSG00000273015 | 506.2492575 | 171.6643211 | 1.56151125   | 1.07E-12 | 1.63E-11 | AC008124.1 |
| ENSG00000197859 | 139.2580301 | 2.71182843  | 5.632453125  | 1.09E-12 | 1.65E-11 | ADAMTSL2   |
| ENSG00000163909 | 291.2952556 | 11.34305213 | 4.677616239  | 1.12E-12 | 1.70E-11 | HEYL       |
| ENSG00000184271 | 382.6337403 | 97.62195783 | 1.971819809  | 1.15E-12 | 1.74E-11 | AC139768.1 |
| ENSG00000121774 | 2027.384968 | 4555.332738 | -1.167946142 | 1.16E-12 | 1.75E-11 | KHDRBS1    |
| ENSG00000169169 | 70.7418028  | 589.6676491 | -3.059901267 | 1.16E-12 | 1.76E-11 | CPT1C      |
| ENSG00000164418 | 1403.87446  | 65.71179084 | 4.419406081  | 1.21E-12 | 1.82E-11 | GRIK2      |
| ENSG00000251141 | 115.1315913 | 9.081091731 | 3.645175501  | 1.22E-12 | 1.84E-11 | MRPS30-DT  |
| ENSG00000091831 | 87.04598822 | 3.139187216 | 4.764847531  | 1.22E-12 | 1.84E-11 | ESR1       |
| ENSG00000134313 | 3324.745051 | 1124.381789 | 1.563908478  | 1.26E-12 | 1.90E-11 | KIDINS220  |
| ENSG00000182132 | 256.5599495 | 0           | 10.336762    | 1.26E-12 | 1.90E-11 | KCNIP1     |
| ENSG00000114354 | 1266.821095 | 3068.447794 | -1.276247557 | 1.27E-12 | 1.91E-11 | TFG        |
| ENSG00000229647 | 2.450478525 | 131.7163646 | -5.75675078  | 1.28E-12 | 1.93E-11 | MYOSLID    |
| ENSG00000203880 | 769.4370298 | 241.158037  | 1.673811812  | 1.32E-12 | 1.99E-11 | PCMTD2     |
| ENSG00000175166 | 2403.454566 | 10262.82604 | -2.094218473 | 1.34E-12 | 2.02E-11 | PSMD2      |
| ENSG00000164129 | 94.99679833 | 0           | 8.903621162  | 1.35E-12 | 2.03E-11 | NPY5R      |
| ENSG00000132305 | 988.8127344 | 2393.443271 | -1.275345215 | 1.37E-12 | 2.05E-11 | IMMT       |
| ENSG00000172009 | 605.3236774 | 2160.707972 | -1.835664981 | 1.39E-12 | 2.08E-11 | AC006538.1 |
| ENSG00000115594 | 409.5723764 | 4299.054121 | -3.391944032 | 1.43E-12 | 2.15E-11 | IL1R1      |
| ENSG00000077238 | 499.4591152 | 2510.636917 | -2.329601294 | 1.44E-12 | 2.16E-11 | IL4R       |
| ENSG00000184113 | 567.4328096 | 26.20048693 | 4.439486117  | 1.49E-12 | 2.23E-11 | CLDN5      |
| ENSG00000183484 | 197.5024503 | 0.387220594 | 8.997534838  | 1.50E-12 | 2.25E-11 | GPR132     |

|                 |             |             |              |          |          |            |
|-----------------|-------------|-------------|--------------|----------|----------|------------|
| ENSG00000049239 | 1581.898965 | 5038.36163  | -1.671241278 | 1.52E-12 | 2.28E-11 | H6PD       |
| ENSG00000110665 | 159.4627424 | 1.00940975  | 7.228219769  | 1.56E-12 | 2.33E-11 | C11orf21   |
| ENSG00000115165 | 166.4884417 | 2.292641984 | 6.236923322  | 1.56E-12 | 2.34E-11 | CYTIP      |
| ENSG00000071564 | 921.6666514 | 2276.344176 | -1.304263823 | 1.59E-12 | 2.38E-11 | TCF3       |
| novel.102       | 88.68207683 | 6.440083075 | 3.781019302  | 1.60E-12 | 2.39E-11 | -          |
| ENSG00000158042 | 537.7805955 | 2338.159549 | -2.1203925   | 1.60E-12 | 2.40E-11 | MRPL17     |
| ENSG00000081138 | 307.8550867 | 0           | 10.59975154  | 1.61E-12 | 2.41E-11 | CDH7       |
| ENSG00000108561 | 949.1986086 | 3180.857317 | -1.744773783 | 1.64E-12 | 2.44E-11 | C1QBP      |
| ENSG00000108370 | 700.4653454 | 47.81911033 | 3.87619621   | 1.65E-12 | 2.46E-11 | RGS9       |
| ENSG00000170373 | 430.9795594 | 7.919429948 | 5.750843639  | 1.65E-12 | 2.47E-11 | CST1       |
| ENSG00000168283 | 1596.796236 | 583.3037109 | 1.452577922  | 1.67E-12 | 2.48E-11 | BMI1       |
| ENSG00000272316 | 183.883933  | 32.68070819 | 2.497907346  | 1.69E-12 | 2.51E-11 | AL021368.2 |
| ENSG00000100342 | 709.0919266 | 127.1945928 | 2.477951378  | 1.83E-12 | 2.73E-11 | APOL1      |
| ENSG00000140090 | 310.0467488 | 2.160459047 | 7.167604228  | 1.86E-12 | 2.76E-11 | SLC24A4    |
| ENSG00000188897 | 100.6483948 | 2.486316478 | 5.328945681  | 1.87E-12 | 2.78E-11 | AC099489.1 |
| ENSG00000157020 | 1503.239982 | 4547.720113 | -1.597067659 | 1.89E-12 | 2.81E-11 | SEC13      |
| ENSG00000121807 | 179.2582934 | 0           | 9.81942311   | 1.89E-12 | 2.81E-11 | CCR2       |
| ENSG00000140988 | 15112.74876 | 43512.62632 | -1.525676423 | 1.93E-12 | 2.86E-11 | RPS2       |
| ENSG00000177283 | 1433.057246 | 180.0671732 | 2.991876963  | 1.93E-12 | 2.87E-11 | FZD8       |
| ENSG00000183682 | 217.6349505 | 35.00672869 | 2.630207951  | 1.97E-12 | 2.92E-11 | BMP8A      |
| ENSG00000183971 | 3.969621095 | 71.96107193 | -4.188269082 | 1.98E-12 | 2.94E-11 | NPW        |
| ENSG00000180592 | 265.273682  | 24.35527283 | 3.449717999  | 1.99E-12 | 2.95E-11 | SKIDA1     |
| ENSG00000078114 | 1546.807661 | 57.92694961 | 4.735640843  | 2.01E-12 | 2.98E-11 | NEBL       |
| ENSG00000149136 | 1434.73108  | 3786.691691 | -1.400210328 | 2.02E-12 | 2.98E-11 | SSRP1      |
| ENSG00000115241 | 1289.153199 | 3503.793302 | -1.44254689  | 2.03E-12 | 3.00E-11 | PPM1G      |
| ENSG00000067208 | 1742.161367 | 504.1472247 | 1.789372793  | 2.07E-12 | 3.06E-11 | EVI5       |
| ENSG00000105855 | 18400.72612 | 283.8029836 | 6.018280861  | 2.07E-12 | 3.06E-11 | ITGB8      |
| ENSG00000136531 | 828.4199026 | 29.61978958 | 4.801373335  | 2.10E-12 | 3.10E-11 | SCN2A      |
| ENSG00000214870 | 217.2881734 | 0.356539013 | 9.135537594  | 2.11E-12 | 3.11E-11 | AC004540.1 |
| ENSG00000114541 | 666.936818  | 18.97804711 | 5.127087839  | 2.11E-12 | 3.11E-11 | FRMD4B     |
| ENSG00000251442 | 199.126217  | 13.29793993 | 3.917388199  | 2.19E-12 | 3.22E-11 | LINC01094  |
| ENSG00000230910 | 241.5507913 | 3.792057953 | 5.968497317  | 2.25E-12 | 3.32E-11 | AL391807.1 |
| ENSG00000259207 | 20.6837365  | 1116.014937 | -5.754170742 | 2.27E-12 | 3.33E-11 | ITGB3      |
| ENSG00000177084 | 460.3238589 | 1376.8985   | -1.580488836 | 2.29E-12 | 3.37E-11 | POLE       |
| ENSG00000184005 | 94.1074026  | 3.495726228 | 4.725865454  | 2.31E-12 | 3.40E-11 | ST6GALNAC3 |
| ENSG00000178773 | 21.23253711 | 1655.250139 | -6.286231494 | 2.35E-12 | 3.45E-11 | CPNE7      |
| ENSG00000132432 | 853.315021  | 3427.531387 | -2.006047853 | 2.42E-12 | 3.56E-11 | SEC61G     |
| ENSG00000115107 | 321.6438753 | 3085.749376 | -3.26208383  | 2.43E-12 | 3.56E-11 | STEAP3     |
| ENSG00000283196 | 90.3451328  | 313.5874578 | -1.795239812 | 2.45E-12 | 3.60E-11 | AC006453.2 |
| ENSG00000035115 | 757.8258251 | 241.9849795 | 1.646386339  | 2.48E-12 | 3.63E-11 | SH3YL1     |
| ENSG00000188613 | 259.3675378 | 18.31315122 | 3.82456044   | 2.56E-12 | 3.75E-11 | NANOS1     |
| ENSG00000065485 | 176.952128  | 1715.103667 | -3.277102569 | 2.57E-12 | 3.76E-11 | PDIA5      |
| ENSG00000170537 | 160.7377944 | 14.15394177 | 3.511448938  | 2.62E-12 | 3.83E-11 | TMC7       |
| ENSG00000067704 | 1024.830442 | 2682.425474 | -1.388255896 | 2.64E-12 | 3.86E-11 | IARS2      |
| ENSG00000168913 | 159.7137441 | 2.864080462 | 5.799500502  | 2.65E-12 | 3.88E-11 | ENHO       |
| ENSG00000100433 | 96.45472522 | 0           | 8.925150488  | 2.69E-12 | 3.92E-11 | KCNK10     |
| ENSG00000112624 | 596.6058591 | 201.6665794 | 1.565276062  | 2.79E-12 | 4.08E-11 | BICRAL     |
| ENSG00000228058 | 155.9637264 | 0           | 9.618759654  | 2.80E-12 | 4.09E-11 | LINC01736  |
| ENSG00000198081 | 443.8617836 | 146.3000237 | 1.600204987  | 2.88E-12 | 4.20E-11 | ZBTB14     |
| ENSG00000186088 | 1366.206611 | 109.7246819 | 3.640064198  | 2.96E-12 | 4.31E-11 | GSAP       |
| ENSG00000164182 | 275.3281344 | 811.6126488 | -1.559677906 | 3.07E-12 | 4.48E-11 | NDUFAF2    |

|                 |             |             |              |          |          |            |
|-----------------|-------------|-------------|--------------|----------|----------|------------|
| ENSG00000177614 | 211.2559926 | 9.803497972 | 4.43476743   | 3.13E-12 | 4.56E-11 | PGBD5      |
| ENSG00000149573 | 229.951734  | 0.774441189 | 8.305895088  | 3.14E-12 | 4.57E-11 | MPZL2      |
| ENSG00000167695 | 391.215052  | 1139.258395 | -1.541828533 | 3.14E-12 | 4.57E-11 | FAM57A     |
| ENSG00000188732 | 268.4945024 | 16.01922497 | 4.072335905  | 3.19E-12 | 4.63E-11 | FAM221A    |
| ENSG00000180383 | 121.5494409 | 1.518200796 | 6.3848515    | 3.20E-12 | 4.65E-11 | DEFB124    |
| ENSG00000116260 | 2625.190342 | 11559.59451 | -2.138575343 | 3.23E-12 | 4.68E-11 | QSOX1      |
| ENSG00000103222 | 73.02405005 | 364.7682317 | -2.320290386 | 3.28E-12 | 4.75E-11 | ABCC1      |
| ENSG00000066056 | 325.0452347 | 17.02735045 | 4.264046866  | 3.29E-12 | 4.78E-11 | TIE1       |
| ENSG00000135547 | 95.72243574 | 1.365948763 | 6.072171611  | 3.33E-12 | 4.83E-11 | HEY2       |
| ENSG00000147724 | 214.4488366 | 0           | 10.07845505  | 3.34E-12 | 4.84E-11 | FAM135B    |
| ENSG00000130985 | 4123.373192 | 11702.0155  | -1.504829972 | 3.35E-12 | 4.84E-11 | UBA1       |
| ENSG00000105519 | 1487.939296 | 103.0135204 | 3.852873422  | 3.36E-12 | 4.86E-11 | CAPS       |
| ENSG00000178921 | 333.1668852 | 1267.717494 | -1.927990976 | 3.37E-12 | 4.87E-11 | PFAS       |
| ENSG00000108559 | 296.6860375 | 884.5716658 | -1.576181612 | 3.37E-12 | 4.87E-11 | NUP88      |
| ENSG00000077312 | 604.6069139 | 1539.035808 | -1.347955277 | 3.40E-12 | 4.90E-11 | SNRPA      |
| ENSG00000162702 | 226.7346196 | 1092.715637 | -2.268704072 | 3.41E-12 | 4.93E-11 | ZNF281     |
| ENSG00000120262 | 138.4339385 | 15.50110571 | 3.148347399  | 3.43E-12 | 4.95E-11 | CCDC170    |
| ENSG00000013375 | 634.2099359 | 1862.132029 | -1.553882577 | 3.54E-12 | 5.10E-11 | PGM3       |
| ENSG00000230590 | 1686.921998 | 461.3633608 | 1.870564657  | 3.56E-12 | 5.13E-11 | FTX        |
| ENSG00000125869 | 100.2331499 | 0           | 8.980571806  | 3.61E-12 | 5.20E-11 | LAMP5      |
| ENSG00000027001 | 162.0378317 | 451.5283293 | -1.478836916 | 3.65E-12 | 5.26E-11 | MIPEP      |
| ENSG00000152689 | 242.5596397 | 25.56884116 | 3.252317785  | 3.70E-12 | 5.33E-11 | RASGRP3    |
| ENSG00000178977 | 105.2775931 | 4.340987191 | 4.605967224  | 3.71E-12 | 5.33E-11 | LINC00324  |
| ENSG00000134531 | 2779.110386 | 11441.81075 | -2.041632677 | 3.75E-12 | 5.39E-11 | EMP1       |
| ENSG00000182968 | 127.2003814 | 0           | 9.324772028  | 3.76E-12 | 5.40E-11 | SOX1       |
| ENSG00000115275 | 1041.014478 | 2646.084108 | -1.345748886 | 3.77E-12 | 5.42E-11 | MOGS       |
| ENSG00000165732 | 921.0958111 | 3465.378158 | -1.911707697 | 3.85E-12 | 5.52E-11 | DDX21      |
| ENSG00000107331 | 8291.984196 | 1094.994888 | 2.920942985  | 3.93E-12 | 5.64E-11 | ABCA2      |
| ENSG00000072195 | 48.79971191 | 1225.132973 | -4.650948634 | 4.08E-12 | 5.85E-11 | SPEG       |
| ENSG00000239887 | 159.2198189 | 11.27223236 | 3.81008861   | 4.16E-12 | 5.95E-11 | C1orf226   |
| ENSG00000277829 | 143.5877628 | 5.238154706 | 4.805009702  | 4.17E-12 | 5.96E-11 | AL031651.2 |
| ENSG00000106004 | 2.12199297  | 248.5417312 | -6.873253397 | 4.27E-12 | 6.11E-11 | HOXA5      |
| ENSG00000065427 | 1315.232814 | 4136.271789 | -1.653108616 | 4.28E-12 | 6.12E-11 | KARS       |
| ENSG00000135838 | 445.3838489 | 45.7205752  | 3.280221454  | 4.31E-12 | 6.16E-11 | NPL        |
| ENSG00000181790 | 304.6922067 | 7.406914488 | 5.375084842  | 4.33E-12 | 6.18E-11 | ADGRB1     |
| ENSG00000089356 | 81.88717757 | 0           | 8.68952898   | 4.33E-12 | 6.18E-11 | FXD3       |
| ENSG00000112303 | 117.2101335 | 1.161661783 | 6.748606547  | 4.35E-12 | 6.20E-11 | VNN2       |
| ENSG00000150681 | 219.6554247 | 0.693008929 | 8.264637179  | 4.35E-12 | 6.20E-11 | RGS18      |
| ENSG00000143515 | 1173.630155 | 2658.634293 | -1.179680208 | 4.36E-12 | 6.21E-11 | ATP8B2     |
| ENSG00000060762 | 845.1378295 | 182.1794501 | 2.212227305  | 4.36E-12 | 6.21E-11 | MPC1       |
| ENSG00000247746 | 156.5985302 | 30.06233717 | 2.37919345   | 4.37E-12 | 6.23E-11 | USP51      |
| ENSG00000084774 | 742.4563371 | 2131.135499 | -1.521384929 | 4.41E-12 | 6.27E-11 | CAD        |
| ENSG00000102981 | 135.8439486 | 10.21322781 | 3.722686504  | 4.52E-12 | 6.43E-11 | PARD6A     |
| ENSG00000205364 | 284.6372512 | 16.86821035 | 4.070045134  | 4.53E-12 | 6.44E-11 | MT1M       |
| ENSG00000285564 | 82.67531213 | 0           | 8.703099803  | 4.66E-12 | 6.62E-11 | AL031121.2 |
| ENSG00000165733 | 715.0818971 | 1699.518387 | -1.248968231 | 4.67E-12 | 6.63E-11 | BMS1       |
| ENSG00000129167 | 77.81063963 | 2.10970837  | 5.181923173  | 4.67E-12 | 6.63E-11 | TPH1       |
| ENSG00000178764 | 448.6973802 | 134.7607286 | 1.736363579  | 4.80E-12 | 6.81E-11 | ZHX2       |
| ENSG00000163864 | 78.38053915 | 5.381078522 | 3.864806058  | 4.82E-12 | 6.84E-11 | NMNAT3     |
| ENSG00000164236 | 1190.352469 | 73.63216673 | 4.012909181  | 4.87E-12 | 6.90E-11 | ANKRD33B   |
| ENSG00000010030 | 124.0158174 | 19.63652165 | 2.666970784  | 4.88E-12 | 6.91E-11 | ETV7       |

|                 |             |             |              |          |          |            |
|-----------------|-------------|-------------|--------------|----------|----------|------------|
| ENSG00000254343 | 78.83775213 | 2.884149558 | 4.777699693  | 4.93E-12 | 6.98E-11 | AC091563.1 |
| ENSG00000196208 | 138.1756139 | 1.080229524 | 7.002606683  | 5.00E-12 | 7.07E-11 | GREB1      |
| ENSG00000131653 | 708.1474854 | 2245.878519 | -1.665074001 | 5.03E-12 | 7.12E-11 | TRAF7      |
| ENSG00000129083 | 1706.773331 | 4388.265749 | -1.362399474 | 5.08E-12 | 7.18E-11 | COPB1      |
| ENSG00000267272 | 167.0534135 | 15.84574797 | 3.400066145  | 5.33E-12 | 7.53E-11 | LINC01140  |
| ENSG00000189057 | 14.024232   | 247.4906294 | -4.137123425 | 5.41E-12 | 7.63E-11 | FAM111B    |
| ENSG00000166035 | 176.4902568 | 0.336469917 | 8.835128051  | 5.41E-12 | 7.63E-11 | LIPC       |
| ENSG00000142065 | 325.7165536 | 61.4171064  | 2.410330403  | 5.46E-12 | 7.69E-11 | ZFP14      |
| novel.427       | 4.529633624 | 132.3806185 | -4.866085158 | 5.47E-12 | 7.70E-11 | -          |
| ENSG00000152926 | 1044.851184 | 279.4319319 | 1.90374595   | 5.60E-12 | 7.89E-11 | ZNF117     |
| ENSG00000115596 | 191.0474189 | 2.742510011 | 6.088419618  | 5.63E-12 | 7.93E-11 | WNT6       |
| ENSG00000134901 | 131.9078475 | 765.9438383 | -2.538315127 | 5.65E-12 | 7.94E-11 | POGLUT2    |
| ENSG00000176171 | 745.0780527 | 6754.785614 | -3.180426523 | 5.65E-12 | 7.95E-11 | BNIP3      |
| ENSG00000271533 | 338.5020626 | 64.32402199 | 2.394734219  | 5.67E-12 | 7.97E-11 | Z83843.1   |
| ENSG00000134716 | 323.0953219 | 22.24569285 | 3.860201886  | 5.75E-12 | 8.08E-11 | CYP2J2     |
| ENSG00000147437 | 246.3559714 | 45.69562582 | 2.42899366   | 5.80E-12 | 8.13E-11 | GNRH1      |
| ENSG00000011478 | 139.613384  | 642.9353657 | -2.202545839 | 5.82E-12 | 8.16E-11 | QPCTL      |
| ENSG00000058404 | 474.6537512 | 17.31191382 | 4.783075355  | 5.95E-12 | 8.34E-11 | CAMK2B     |
| ENSG00000083097 | 635.3174123 | 127.8985522 | 2.311100645  | 5.99E-12 | 8.40E-11 | DOP1A      |
| ENSG00000186235 | 168.2872644 | 9.608667603 | 4.145736641  | 6.01E-12 | 8.42E-11 | LINC02610  |
| ENSG00000146143 | 118.676053  | 473.8371491 | -1.998253244 | 6.02E-12 | 8.43E-11 | PRIM2      |
| ENSG00000173540 | 265.2443333 | 1005.636202 | -1.922949223 | 6.05E-12 | 8.47E-11 | GMPPB      |
| ENSG00000112249 | 606.8670502 | 2054.889125 | -1.759817228 | 6.08E-12 | 8.50E-11 | ASCC3      |
| ENSG00000204899 | 346.944859  | 1089.00784  | -1.650629825 | 6.12E-12 | 8.55E-11 | MZT1       |
| ENSG00000101412 | 106.9411632 | 646.2304262 | -2.594520616 | 6.12E-12 | 8.55E-11 | E2F1       |
| ENSG00000145014 | 148.4167629 | 812.5282375 | -2.452886641 | 6.18E-12 | 8.62E-11 | TMEM44     |
| ENSG00000160226 | 564.527927  | 165.6128713 | 1.76959309   | 6.19E-12 | 8.64E-11 | CFAP410    |
| ENSG00000164136 | 189.8261483 | 52.6066735  | 1.849965328  | 6.20E-12 | 8.65E-11 | IL15       |
| ENSG00000123179 | 203.3125344 | 1015.458565 | -2.320793843 | 6.25E-12 | 8.71E-11 | EBPL       |
| ENSG00000072210 | 2359.026859 | 850.2495041 | 1.472352706  | 6.35E-12 | 8.84E-11 | ALDH3A2    |
| ENSG00000175302 | 109.1238302 | 0           | 9.103879156  | 6.40E-12 | 8.91E-11 | ANKRD30BP1 |
| ENSG00000260260 | 139.2249364 | 417.7371767 | -1.585346721 | 6.46E-12 | 8.99E-11 | SNHG19     |
| ENSG00000129173 | 1.7871679   | 96.9674645  | -5.747408594 | 6.60E-12 | 9.18E-11 | E2F8       |
| ENSG00000163638 | 1781.638722 | 95.13965692 | 4.229065935  | 6.69E-12 | 9.30E-11 | ADAMTS9    |
| ENSG00000184840 | 2222.300615 | 7264.159632 | -1.708757395 | 6.78E-12 | 9.41E-11 | TMED9      |
| ENSG00000166813 | 248.5493793 | 861.8725086 | -1.794262619 | 6.91E-12 | 9.59E-11 | KIF7       |
| ENSG00000140950 | 193.3207484 | 1100.984894 | -2.509758586 | 7.09E-12 | 9.84E-11 | MEAK7      |
| ENSG00000165457 | 100.0455719 | 0           | 8.977859517  | 7.14E-12 | 9.91E-11 | FOLR2      |
| ENSG00000165178 | 136.5326879 | 0.713078025 | 7.571749762  | 7.27E-12 | 1.01E-10 | NCF1C      |
| ENSG00000229520 | 133.740476  | 0           | 9.397233469  | 7.30E-12 | 1.01E-10 | LINC00404  |
| ENSG00000155307 | 372.2564417 | 25.69973983 | 3.865577004  | 7.34E-12 | 1.02E-10 | SAMSN1     |
| ENSG00000073150 | 17.91723763 | 121.2807541 | -2.759783123 | 7.42E-12 | 1.03E-10 | PANX2      |
| ENSG00000107771 | 1866.469584 | 621.0166511 | 1.587386197  | 7.49E-12 | 1.04E-10 | CCSER2     |
| ENSG00000166405 | 99.65638485 | 0           | 8.973094935  | 7.50E-12 | 1.04E-10 | RIC3       |
| ENSG00000143669 | 1286.990663 | 323.406307  | 1.993284935  | 7.53E-12 | 1.04E-10 | LYST       |
| novel.830       | 0.879722543 | 136.4724411 | -7.242832246 | 7.75E-12 | 1.07E-10 | -          |
| ENSG00000186335 | 176.4197956 | 0           | 9.796433111  | 7.76E-12 | 1.07E-10 | SLC36A2    |
| ENSG00000153563 | 272.5341388 | 1.029478846 | 8.003791525  | 7.78E-12 | 1.07E-10 | CD8A       |
| ENSG00000100485 | 1179.977401 | 456.6831252 | 1.369013235  | 7.87E-12 | 1.09E-10 | SOS2       |
| ENSG00000115361 | 125.0122997 | 0           | 9.299376237  | 7.88E-12 | 1.09E-10 | ACADL      |
| ENSG00000035403 | 2850.306142 | 6680.475645 | -1.228852115 | 8.07E-12 | 1.11E-10 | VCL        |

|                 |             |             |              |          |          |            |
|-----------------|-------------|-------------|--------------|----------|----------|------------|
| ENSG00000143621 | 1369.507243 | 4153.11597  | -1.600645312 | 8.09E-12 | 1.11E-10 | ILF2       |
| ENSG00000197157 | 1975.631929 | 7040.124386 | -1.833293641 | 8.10E-12 | 1.11E-10 | SND1       |
| novel.439       | 145.9159253 | 2.221822211 | 6.065270886  | 8.31E-12 | 1.14E-10 | -          |
| ENSG00000106348 | 559.2321666 | 1879.494741 | -1.748845156 | 8.48E-12 | 1.17E-10 | IMPDH1     |
| ENSG00000130204 | 831.8616149 | 2338.729963 | -1.49141885  | 8.51E-12 | 1.17E-10 | TOMM40     |
| ENSG00000253877 | 75.90269382 | 0           | 8.5799621    | 8.52E-12 | 1.17E-10 | LINC01608  |
| ENSG00000134684 | 744.3684708 | 2547.56967  | -1.775195381 | 8.67E-12 | 1.19E-10 | YARS       |
| ENSG00000173406 | 220.8903325 | 0.743759607 | 8.256717553  | 8.74E-12 | 1.20E-10 | DAB1       |
| ENSG00000128510 | 7.08717119  | 424.2322613 | -5.908953579 | 8.79E-12 | 1.20E-10 | CPA4       |
| ENSG00000174437 | 2430.559965 | 7623.991402 | -1.649274643 | 8.81E-12 | 1.21E-10 | ATP2A2     |
| ENSG00000197558 | 152.1113075 | 10.81303612 | 3.798875666  | 8.86E-12 | 1.21E-10 | SSPO       |
| ENSG00000169989 | 101.102602  | 2.802717299 | 5.151011942  | 8.87E-12 | 1.21E-10 | TIGD4      |
| ENSG00000196547 | 2960.621485 | 430.3984619 | 2.782135988  | 9.10E-12 | 1.25E-10 | MAN2A2     |
| ENSG00000138468 | 765.6287623 | 162.8434853 | 2.233166399  | 9.16E-12 | 1.25E-10 | SENP7      |
| ENSG00000115085 | 149.1599076 | 0           | 9.554218255  | 9.26E-12 | 1.27E-10 | ZAP70      |
| ENSG00000013725 | 138.1223477 | 0           | 9.44326803   | 9.35E-12 | 1.28E-10 | CD6        |
| ENSG00000138757 | 1154.056169 | 3698.759884 | -1.680410862 | 9.45E-12 | 1.29E-10 | G3BP2      |
| ENSG00000187122 | 153.2365613 | 2.058957692 | 6.17827526   | 9.48E-12 | 1.29E-10 | SLIT1      |
| ENSG00000168546 | 301.7052359 | 3.404837359 | 6.43942648   | 9.60E-12 | 1.31E-10 | GFRA2      |
| ENSG00000145794 | 311.2927771 | 35.49904666 | 3.126970999  | 9.67E-12 | 1.32E-10 | MEGF10     |
| ENSG00000196368 | 28.09813959 | 223.1829779 | -2.992517626 | 1.00E-11 | 1.36E-10 | NUDT11     |
| ENSG00000205189 | 569.2729599 | 228.3890384 | 1.317802271  | 1.01E-11 | 1.37E-10 | ZBTB10     |
| ENSG00000213190 | 260.9481214 | 751.2270159 | -1.525580531 | 1.03E-11 | 1.41E-10 | MLLT11     |
| ENSG00000079950 | 2565.495489 | 1063.409962 | 1.270747125  | 1.08E-11 | 1.46E-10 | STX7       |
| ENSG00000186193 | 9.925128383 | 287.5482725 | -4.855094923 | 1.08E-11 | 1.47E-10 | SAPCD2     |
| ENSG00000196262 | 11261.83224 | 23871.67553 | -1.083857675 | 1.08E-11 | 1.47E-10 | PPIA       |
| ENSG00000242372 | 733.902063  | 2045.507795 | -1.478913436 | 1.08E-11 | 1.47E-10 | EIF6       |
| ENSG00000129353 | 7941.59419  | 2507.807725 | 1.663006524  | 1.08E-11 | 1.47E-10 | SLC44A2    |
| ENSG00000101955 | 295.9303692 | 3817.349695 | -3.689329442 | 1.09E-11 | 1.48E-10 | SRPX       |
| ENSG00000100075 | 743.8965422 | 2215.456722 | -1.574261911 | 1.09E-11 | 1.48E-10 | SLC25A1    |
| ENSG00000049449 | 1176.588103 | 4315.894395 | -1.875097328 | 1.13E-11 | 1.53E-10 | RCN1       |
| ENSG00000179115 | 785.994581  | 2305.348237 | -1.552533514 | 1.13E-11 | 1.53E-10 | FARSA      |
| ENSG00000133116 | 133.60934   | 0.387220594 | 8.433577942  | 1.13E-11 | 1.53E-10 | KL         |
| ENSG00000149925 | 77.00001066 | 435.1172477 | -2.497425571 | 1.16E-11 | 1.56E-10 | ALDOA      |
| ENSG00000214652 | 106.0684206 | 1.00940975  | 6.63611353   | 1.17E-11 | 1.59E-10 | ZNF727     |
| ENSG00000075188 | 209.3868539 | 657.5380449 | -1.651228921 | 1.20E-11 | 1.62E-10 | NUP37      |
| ENSG00000186871 | 10.75198386 | 262.0370916 | -4.602750131 | 1.23E-11 | 1.66E-10 | ERCC6L     |
| ENSG00000167701 | 121.5833607 | 6.980711577 | 4.13850025   | 1.23E-11 | 1.66E-10 | GPT        |
| ENSG00000164442 | 986.8660391 | 7004.832534 | -2.827467127 | 1.25E-11 | 1.69E-10 | CITED2     |
| ENSG00000184916 | 275.3510561 | 36.99918614 | 2.901556822  | 1.27E-11 | 1.72E-10 | JAG2       |
| ENSG00000109944 | 168.7362706 | 23.53367698 | 2.83906968   | 1.30E-11 | 1.75E-10 | JHY        |
| ENSG00000128849 | 455.7982234 | 4.892356573 | 6.530733818  | 1.30E-11 | 1.75E-10 | CGNL1      |
| ENSG00000105483 | 1182.071512 | 419.151774  | 1.495957459  | 1.31E-11 | 1.77E-10 | CARD8      |
| ENSG00000132640 | 1603.050814 | 407.0848686 | 1.977042655  | 1.32E-11 | 1.77E-10 | BTBD3      |
| ENSG00000154783 | 354.8196489 | 4.474454397 | 6.289261902  | 1.32E-11 | 1.78E-10 | FGD5       |
| ENSG00000150672 | 83.29564234 | 7.326638104 | 3.523612695  | 1.34E-11 | 1.80E-10 | DLG2       |
| ENSG00000082269 | 502.1721508 | 113.6318074 | 2.145376347  | 1.35E-11 | 1.81E-10 | FAM135A    |
| ENSG00000102032 | 888.0096456 | 83.87590087 | 3.407181833  | 1.36E-11 | 1.83E-10 | RENBP      |
| ENSG00000287642 | 135.0959308 | 0.356539013 | 8.450084474  | 1.37E-11 | 1.84E-10 | AC093599.2 |
| ENSG00000173890 | 95.97258181 | 6.510902848 | 3.887026149  | 1.37E-11 | 1.84E-10 | GPR160     |
| ENSG00000176788 | 453.9188417 | 4614.234918 | -3.345743205 | 1.38E-11 | 1.84E-10 | BASP1      |

|                 |             |             |              |          |          |              |
|-----------------|-------------|-------------|--------------|----------|----------|--------------|
| ENSG00000122378 | 1722.584286 | 336.7206516 | 2.35463753   | 1.39E-11 | 1.86E-10 | PRXL2A       |
| ENSG00000082684 | 85.25946106 | 0           | 8.747124455  | 1.41E-11 | 1.89E-10 | SEMA5B       |
| ENSG00000136270 | 685.4677348 | 1940.26532  | -1.501187008 | 1.43E-11 | 1.91E-10 | TBRG4        |
| ENSG00000188486 | 686.8852598 | 2752.798839 | -2.002875686 | 1.43E-11 | 1.91E-10 | H2AFX        |
| ENSG00000135472 | 152.0688538 | 6.03394926  | 4.648822724  | 1.43E-11 | 1.91E-10 | FAIM2        |
| ENSG00000165704 | 324.0262726 | 942.6909585 | -1.540901535 | 1.44E-11 | 1.93E-10 | HPRT1        |
| ENSG00000089177 | 689.388207  | 193.9886678 | 1.828111013  | 1.45E-11 | 1.93E-10 | KIF16B       |
| ENSG00000182050 | 97.92293856 | 1.161661783 | 6.491261461  | 1.45E-11 | 1.94E-10 | MGAT4C       |
| ENSG00000029639 | 166.8093063 | 517.0933092 | -1.632861226 | 1.46E-11 | 1.94E-10 | TFB1M        |
| ENSG00000136868 | 462.6866366 | 1576.008842 | -1.768391592 | 1.46E-11 | 1.94E-10 | SLC31A1      |
| ENSG00000181908 | 92.01843178 | 0           | 8.857233938  | 1.51E-11 | 2.02E-10 | AP003774.1   |
| ENSG00000131781 | 93.93959825 | 11.03610792 | 3.083260535  | 1.51E-11 | 2.02E-10 | FMO5         |
| ENSG00000231312 | 497.8854966 | 182.6593918 | 1.446532928  | 1.52E-11 | 2.02E-10 | MAP4K3-DT    |
| ENSG00000135298 | 371.7248654 | 9.683211791 | 5.250349317  | 1.52E-11 | 2.02E-10 | ADGRB3       |
| ENSG00000050820 | 151.4769021 | 451.8464339 | -1.576098191 | 1.53E-11 | 2.03E-10 | BCAR1        |
| ENSG00000175895 | 500.9955252 | 167.3426323 | 1.581580333  | 1.54E-11 | 2.04E-10 | PLEKHF2      |
| ENSG00000138380 | 393.3931466 | 104.3348359 | 1.91557537   | 1.54E-11 | 2.05E-10 | CARF         |
| ENSG00000105737 | 353.760003  | 9.225171423 | 5.244075635  | 1.55E-11 | 2.06E-10 | GRIK5        |
| ENSG00000269378 | 532.2286238 | 2279.977719 | -2.098791207 | 1.56E-11 | 2.08E-10 | AC022149.1   |
| ENSG00000112640 | 335.4173483 | 962.7416322 | -1.521142748 | 1.57E-11 | 2.08E-10 | PPP2R5D      |
| ENSG00000243069 | 204.0213914 | 0.356539013 | 9.044808776  | 1.59E-11 | 2.11E-10 | ARHGEF26-AS1 |
| ENSG00000279821 | 13.95144876 | 106.3186543 | -2.932641951 | 1.60E-11 | 2.12E-10 | AC145098.2   |
| ENSG00000164309 | 336.2241743 | 21.38164706 | 3.968499288  | 1.60E-11 | 2.12E-10 | CMYA5        |
| ENSG00000138119 | 1933.829338 | 7988.503651 | -2.046526561 | 1.63E-11 | 2.16E-10 | MYOF         |
| ENSG00000006634 | 86.74447038 | 396.8967658 | -2.194853713 | 1.64E-11 | 2.17E-10 | DBF4         |
| ENSG00000126822 | 2185.185033 | 294.2965712 | 2.891661974  | 1.66E-11 | 2.20E-10 | PLEKHG3      |
| ENSG00000119969 | 92.44746649 | 605.465497  | -2.710952409 | 1.68E-11 | 2.23E-10 | HELLS        |
| ENSG00000280852 | 160.0523019 | 20.36021216 | 2.980657127  | 1.68E-11 | 2.23E-10 | AC025048.6   |
| ENSG00000125968 | 527.6309913 | 6868.088082 | -3.702414028 | 1.69E-11 | 2.23E-10 | ID1          |
| ENSG00000183091 | 149.458065  | 21.09451516 | 2.831652756  | 1.70E-11 | 2.25E-10 | NEB          |
| ENSG00000130147 | 344.0762994 | 3278.326911 | -3.252383378 | 1.72E-11 | 2.27E-10 | SH3BP4       |
| ENSG00000156515 | 1965.169715 | 6786.990877 | -1.788061722 | 1.74E-11 | 2.30E-10 | HK1          |
| ENSG00000166598 | 7195.103641 | 45458.2656  | -2.659458644 | 1.75E-11 | 2.31E-10 | HSP90B1      |
| ENSG00000169562 | 210.6073263 | 0           | 10.05201006  | 1.75E-11 | 2.31E-10 | GJB1         |
| ENSG00000110811 | 487.1347077 | 3822.582549 | -2.972272034 | 1.79E-11 | 2.36E-10 | P3H3         |
| ENSG00000277954 | 72.24526084 | 0           | 8.508749737  | 1.79E-11 | 2.36E-10 | AC092376.2   |
| ENSG00000165810 | 80.94713734 | 0           | 8.672837252  | 1.80E-11 | 2.37E-10 | BTNL9        |
| ENSG00000086598 | 2505.891721 | 6213.974028 | -1.310231893 | 1.83E-11 | 2.41E-10 | TMED2        |
| ENSG00000240476 | 0.293240848 | 329.7829598 | -9.984413603 | 1.85E-11 | 2.43E-10 | LINC00973    |
| ENSG00000146410 | 10.60487898 | 130.8465522 | -3.62668866  | 1.85E-11 | 2.43E-10 | MTFR2        |
| ENSG00000126500 | 230.6284673 | 23.42742373 | 3.301013551  | 1.87E-11 | 2.45E-10 | FLRT1        |
| ENSG00000131788 | 655.2200219 | 1528.744265 | -1.222173654 | 1.87E-11 | 2.46E-10 | PIAS3        |
| ENSG00000138606 | 217.5284335 | 20.84777824 | 3.390090305  | 1.88E-11 | 2.46E-10 | SHF          |
| ENSG00000181997 | 87.10595024 | 0           | 8.77893996   | 1.89E-11 | 2.48E-10 | AQP7P2       |
| ENSG00000287706 | 97.92942062 | 0           | 8.947492849  | 1.89E-11 | 2.48E-10 | AC092924.2   |
| ENSG00000213626 | 695.6070518 | 111.2018111 | 2.64266691   | 1.90E-11 | 2.48E-10 | LBH          |
| ENSG00000143321 | 3014.220776 | 9662.25141  | -1.680551496 | 1.91E-11 | 2.50E-10 | HDGF         |
| ENSG00000172590 | 584.9041184 | 1444.813341 | -1.304669222 | 1.92E-11 | 2.51E-10 | MRPL52       |
| ENSG00000279561 | 83.90329388 | 9.233343763 | 3.175930576  | 1.93E-11 | 2.53E-10 | AL845472.2   |
| ENSG00000272106 | 257.8446183 | 76.90186743 | 1.744315672  | 1.95E-11 | 2.55E-10 | AL691432.2   |
| ENSG00000198900 | 1074.105744 | 3207.534938 | -1.578389824 | 1.99E-11 | 2.60E-10 | TOP1         |

|                 |             |             |              |          |          |            |
|-----------------|-------------|-------------|--------------|----------|----------|------------|
| ENSG00000150093 | 7550.633346 | 38427.11254 | -2.347452675 | 2.00E-11 | 2.61E-10 | ITGB1      |
| ENSG00000107651 | 592.8817533 | 1556.090779 | -1.392147652 | 2.02E-11 | 2.64E-10 | SEC23IP    |
| ENSG00000131475 | 527.6446827 | 1868.056086 | -1.824096952 | 2.06E-11 | 2.69E-10 | VPS25      |
| ENSG00000171903 | 131.0087233 | 1.069617038 | 6.928523367  | 2.06E-11 | 2.69E-10 | CYP4F11    |
| ENSG00000120889 | 1402.088162 | 4224.09116  | -1.591035862 | 2.07E-11 | 2.70E-10 | TNFRSF10B  |
| ENSG00000119285 | 385.6285465 | 1191.596219 | -1.627705801 | 2.12E-11 | 2.76E-10 | HEATR1     |
| ENSG00000145817 | 739.0684946 | 2424.60181  | -1.714162265 | 2.16E-11 | 2.82E-10 | YIPF5      |
| ENSG00000185291 | 217.8307777 | 30.45199791 | 2.834113708  | 2.17E-11 | 2.82E-10 | IL3RA      |
| ENSG00000186047 | 112.6029162 | 0           | 9.148674827  | 2.17E-11 | 2.82E-10 | DLEU7      |
| ENSG00000138032 | 642.1798786 | 251.4232525 | 1.352997875  | 2.17E-11 | 2.82E-10 | PPM1B      |
| ENSG00000166226 | 1463.700223 | 4652.962958 | -1.668610959 | 2.20E-11 | 2.85E-10 | CCT2       |
| ENSG00000131203 | 106.9287971 | 6.777708867 | 3.975468766  | 2.21E-11 | 2.87E-10 | IDO1       |
| ENSG00000136286 | 148.987445  | 1.762625967 | 6.38388376   | 2.23E-11 | 2.90E-10 | MYO1G      |
| ENSG00000186074 | 106.3242651 | 0           | 9.065838055  | 2.24E-11 | 2.91E-10 | CD300LF    |
| ENSG00000165140 | 99.1971906  | 0           | 8.965618194  | 2.24E-11 | 2.91E-10 | FBP1       |
| ENSG00000111481 | 1362.237552 | 3184.540746 | -1.225111744 | 2.32E-11 | 3.00E-10 | COPZ1      |
| ENSG00000136875 | 380.8949227 | 1202.353381 | -1.658753835 | 2.34E-11 | 3.03E-10 | PRPF4      |
| ENSG00000055732 | 218.3839224 | 6.032793384 | 5.171901182  | 2.35E-11 | 3.04E-10 | MCOLN3     |
| ENSG00000128923 | 1950.972284 | 518.9878009 | 1.910544922  | 2.35E-11 | 3.04E-10 | MINDY2     |
| ENSG00000250722 | 771.8530473 | 21.64973735 | 5.148841281  | 2.38E-11 | 3.07E-10 | SELENOP    |
| ENSG00000272523 | 152.6684567 | 17.62027069 | 3.10631603   | 2.38E-11 | 3.07E-10 | LINC01023  |
| ENSG00000173714 | 116.1558127 | 0           | 9.194078919  | 2.38E-11 | 3.08E-10 | WFIKKN2    |
| ENSG00000115233 | 694.3082094 | 2060.757318 | -1.569683717 | 2.38E-11 | 3.08E-10 | PSMD14     |
| ENSG00000100351 | 278.9975195 | 6.460023776 | 5.4571653    | 2.40E-11 | 3.10E-10 | GRAP2      |
| ENSG00000185386 | 155.5931573 | 561.1546863 | -1.851341527 | 2.43E-11 | 3.14E-10 | MAPK11     |
| ENSG00000148180 | 27720.42689 | 4213.060264 | 2.718013089  | 2.46E-11 | 3.17E-10 | GSN        |
| ENSG00000100344 | 0.61420451  | 160.0256136 | -8.041796567 | 2.47E-11 | 3.19E-10 | PNPLA3     |
| ENSG00000120992 | 434.641507  | 1516.063912 | -1.802490163 | 2.49E-11 | 3.21E-10 | LYPLA1     |
| ENSG00000197977 | 250.489006  | 5.075290187 | 5.630163572  | 2.49E-11 | 3.21E-10 | ELOVL2     |
| ENSG00000254470 | 241.2446847 | 695.6396058 | -1.527735361 | 2.50E-11 | 3.22E-10 | AP5B1      |
| ENSG00000179271 | 996.1621619 | 2500.710512 | -1.327952615 | 2.57E-11 | 3.31E-10 | GADD45GIP1 |
| ENSG00000128039 | 199.3236096 | 655.6863626 | -1.718079596 | 2.60E-11 | 3.35E-10 | SRD5A3     |
| ENSG00000146094 | 334.6888911 | 87.3260135  | 1.941100362  | 2.61E-11 | 3.35E-10 | DOK3       |
| ENSG00000175602 | 1247.730834 | 4172.111024 | -1.74147347  | 2.65E-11 | 3.41E-10 | CCDC85B    |
| ENSG00000111275 | 2111.617979 | 509.3973365 | 2.051494683  | 2.65E-11 | 3.41E-10 | ALDH2      |
| ENSG00000163235 | 512.4242643 | 9.189609551 | 5.807538063  | 2.65E-11 | 3.41E-10 | TGFA       |
| ENSG00000036672 | 147.3828565 | 0.356539013 | 8.575758047  | 2.66E-11 | 3.41E-10 | USP2       |
| ENSG00000138379 | 83.84820425 | 1.161661783 | 6.269775224  | 2.68E-11 | 3.43E-10 | MSTN       |
| ENSG00000151422 | 1760.190655 | 388.199975  | 2.180748238  | 2.69E-11 | 3.44E-10 | FER        |
| ENSG00000100412 | 771.2885333 | 1684.307205 | -1.126817727 | 2.69E-11 | 3.45E-10 | ACO2       |
| ENSG00000153898 | 104.2358362 | 7.275887426 | 3.849921983  | 2.69E-11 | 3.45E-10 | MCOLN2     |
| ENSG00000062485 | 1390.626497 | 3545.764466 | -1.350460879 | 2.70E-11 | 3.45E-10 | CS         |
| ENSG00000107863 | 3731.895804 | 1440.735807 | 1.373054761  | 2.71E-11 | 3.46E-10 | ARHGAP21   |
| ENSG00000196182 | 1291.174145 | 521.7059355 | 1.306917219  | 2.75E-11 | 3.52E-10 | STK40      |
| ENSG00000223749 | 93.44950567 | 498.6807803 | -2.414767898 | 2.78E-11 | 3.55E-10 | MIR503HG   |
| ENSG00000025039 | 305.1093735 | 15.99684412 | 4.256967288  | 2.81E-11 | 3.59E-10 | RRAGD      |
| ENSG00000152315 | 119.6048817 | 0.356539013 | 8.27383586   | 2.83E-11 | 3.61E-10 | KCNK13     |
| ENSG00000173402 | 7997.271614 | 2361.074588 | 1.759921832  | 2.83E-11 | 3.61E-10 | DAG1       |
| ENSG00000116985 | 3756.86541  | 2.852312101 | 10.36055808  | 2.84E-11 | 3.62E-10 | BMP8B      |
| ENSG00000134207 | 75.84062394 | 0           | 8.579142127  | 2.85E-11 | 3.63E-10 | SYT6       |
| ENSG00000280061 | 88.02238496 | 0           | 8.79397486   | 2.87E-11 | 3.66E-10 | AC011504.1 |



|                 |             |             |              |          |          |            |
|-----------------|-------------|-------------|--------------|----------|----------|------------|
| novel.911       | 2503.485033 | 0           | 13.62341675  | 2.88E-11 | 3.67E-10 | -          |
| ENSG00000117425 | 169.6028445 | 12.78097654 | 3.725177226  | 2.89E-11 | 3.68E-10 | PTCH2      |
| ENSG00000139618 | 59.9442603  | 298.5443921 | -2.317753616 | 2.90E-11 | 3.69E-10 | BRCA2      |
| ENSG00000123064 | 713.620308  | 1967.835258 | -1.463569166 | 2.90E-11 | 3.69E-10 | DDX54      |
| ENSG00000154760 | 342.7236678 | 74.090721   | 2.210503163  | 2.92E-11 | 3.72E-10 | SLFN13     |
| ENSG00000187210 | 134.1319287 | 578.4397239 | -2.108297179 | 2.94E-11 | 3.74E-10 | GCNT1      |
| ENSG00000182487 | 83.89208196 | 1.436768536 | 5.868424439  | 2.97E-11 | 3.78E-10 | NCF1B      |
| ENSG00000112294 | 484.8323037 | 40.31827171 | 3.583735245  | 3.00E-11 | 3.81E-10 | ALDH5A1    |
| ENSG00000158445 | 222.640159  | 0.672939833 | 8.294394447  | 3.02E-11 | 3.83E-10 | KCNB1      |
| ENSG00000198399 | 1206.733076 | 469.6477117 | 1.361537504  | 3.03E-11 | 3.84E-10 | ITSN2      |
| ENSG00000152818 | 4369.281594 | 934.6988024 | 2.22457817   | 3.06E-11 | 3.88E-10 | UTRN       |
| ENSG00000236404 | 122.2938674 | 5.371621912 | 4.50751206   | 3.09E-11 | 3.92E-10 | VLDLR-AS1  |
| ENSG00000168309 | 267.4249463 | 2.069570178 | 6.985863269  | 3.10E-11 | 3.93E-10 | FAM107A    |
| ENSG00000214826 | 46.60637532 | 247.9787906 | -2.410090476 | 3.15E-11 | 3.99E-10 | DDX12P     |
| ENSG00000121417 | 492.5317717 | 173.7504928 | 1.504252958  | 3.16E-11 | 4.00E-10 | ZNF211     |
| ENSG00000273203 | 97.004752   | 4.748276881 | 4.366699594  | 3.18E-11 | 4.02E-10 | AC006946.2 |
| ENSG00000181513 | 496.7408411 | 162.6448493 | 1.611492521  | 3.20E-11 | 4.05E-10 | ACBD4      |
| ENSG00000185721 | 508.2575241 | 1343.080065 | -1.402051892 | 3.26E-11 | 4.11E-10 | DRG1       |
| ENSG00000099341 | 1605.463107 | 4359.395336 | -1.44114416  | 3.35E-11 | 4.23E-10 | PSMD8      |
| ENSG00000168621 | 2.962638588 | 514.2027817 | -7.430170977 | 3.37E-11 | 4.25E-10 | GDNF       |
| ENSG00000261087 | 279.6604894 | 14.25531473 | 4.308446688  | 3.37E-11 | 4.25E-10 | AP003469.4 |
| ENSG00000110955 | 5862.692758 | 16618.84082 | -1.503207321 | 3.38E-11 | 4.26E-10 | ATP5F1B    |
| novel.25        | 69.49136974 | 1.386017859 | 5.604629204  | 3.38E-11 | 4.26E-10 | -          |
| ENSG00000171224 | 112.375834  | 10.54854185 | 3.400153941  | 3.38E-11 | 4.26E-10 | FAM241B    |
| ENSG00000136895 | 175.8218325 | 27.84025817 | 2.667598376  | 3.39E-11 | 4.27E-10 | GARNL3     |
| ENSG00000214212 | 138.0247484 | 6.247564456 | 4.480137626  | 3.47E-11 | 4.37E-10 | C19orf38   |
| ENSG00000149557 | 3348.520451 | 1026.255699 | 1.706474631  | 3.51E-11 | 4.42E-10 | FEZ1       |
| ENSG00000155962 | 244.7164612 | 4.136700211 | 5.911487455  | 3.51E-11 | 4.42E-10 | CLIC2      |
| ENSG00000143344 | 1524.980416 | 310.3535286 | 2.296589161  | 3.61E-11 | 4.53E-10 | RGL1       |
| ENSG00000279207 | 299.4466675 | 56.82968626 | 2.395045858  | 3.64E-11 | 4.57E-10 | AC015813.6 |
| ENSG00000175318 | 124.746612  | 10.48833456 | 3.557358825  | 3.65E-11 | 4.58E-10 | GRAMD2A    |
| ENSG00000168824 | 465.3568876 | 3.52640781  | 7.035896557  | 3.66E-11 | 4.59E-10 | NSG1       |
| ENSG00000160883 | 83.04835957 | 0           | 8.709994949  | 3.89E-11 | 4.88E-10 | HK3        |
| ENSG00000122042 | 1946.626759 | 565.4722052 | 1.783723225  | 3.90E-11 | 4.89E-10 | UBL3       |
| ENSG00000122729 | 726.2942406 | 3765.735615 | -2.374277578 | 3.98E-11 | 4.98E-10 | ACO1       |
| ENSG00000187808 | 81.71639555 | 1.049547942 | 6.249763379  | 4.03E-11 | 5.04E-10 | SOWAHD     |
| ENSG00000171889 | 0.615458159 | 182.3697257 | -8.229062297 | 4.06E-11 | 5.08E-10 | MIR31HG    |
| ENSG00000149418 | 96.29254838 | 2.089639274 | 5.496994099  | 4.06E-11 | 5.08E-10 | ST14       |
| ENSG00000090006 | 11715.47717 | 1845.41239  | 2.666551842  | 4.14E-11 | 5.17E-10 | LTBP4      |
| ENSG00000131746 | 0.600343103 | 106.5302961 | -7.45879814  | 4.20E-11 | 5.24E-10 | TNS4       |
| ENSG00000100605 | 601.9118748 | 45.66627569 | 3.716263631  | 4.29E-11 | 5.36E-10 | ITPK1      |
| ENSG00000101255 | 113.9733435 | 921.0084252 | -3.01511642  | 4.45E-11 | 5.55E-10 | TRIB3      |
| ENSG00000122884 | 694.3317287 | 4011.940876 | -2.530654201 | 4.48E-11 | 5.59E-10 | P4HA1      |
| ENSG00000101407 | 243.5714504 | 656.6312796 | -1.430778097 | 4.52E-11 | 5.64E-10 | TTI1       |
| ENSG00000283787 | 100.8940245 | 1.130980201 | 6.537202839  | 4.57E-11 | 5.69E-10 | PRR33      |
| ENSG00000132819 | 467.2291787 | 174.7068873 | 1.419215081  | 4.59E-11 | 5.72E-10 | RBM38      |
| ENSG00000196365 | 1338.856695 | 3453.165037 | -1.366866097 | 4.60E-11 | 5.73E-10 | LONP1      |
| ENSG00000155016 | 1381.916562 | 265.676174  | 2.378322915  | 4.63E-11 | 5.76E-10 | CYP2U1     |
| ENSG00000180901 | 1318.642254 | 524.3808366 | 1.330064267  | 4.66E-11 | 5.80E-10 | KCTD2      |
| ENSG00000166741 | 250.2197705 | 5412.209608 | -4.43512356  | 4.68E-11 | 5.82E-10 | NNMT       |
| ENSG00000072954 | 132.3144869 | 11.36312123 | 3.53526012   | 4.73E-11 | 5.88E-10 | TMEM38A    |

|                 |             |             |              |          |          |            |
|-----------------|-------------|-------------|--------------|----------|----------|------------|
| ENSG00000183010 | 152.884212  | 1363.172024 | -3.156988241 | 4.76E-11 | 5.92E-10 | PYCR1      |
| ENSG00000152766 | 125.7954638 | 6.297159258 | 4.340250185  | 4.93E-11 | 6.12E-10 | ANKRD22    |
| ENSG00000188133 | 129.646015  | 0           | 9.351912482  | 4.93E-11 | 6.12E-10 | TMEM215    |
| ENSG00000164880 | 1495.185205 | 4015.1442   | -1.425079446 | 4.94E-11 | 6.12E-10 | INTS1      |
| ENSG00000165028 | 126.2435445 | 16.17404554 | 2.95308424   | 4.95E-11 | 6.13E-10 | NIPSNAP3B  |
| ENSG00000085563 | 174.4309752 | 3.11911812  | 5.781415977  | 4.95E-11 | 6.13E-10 | ABCB1      |
| ENSG00000286169 | 38.7471101  | 758.3416708 | -4.291255917 | 4.95E-11 | 6.13E-10 | AHRR       |
| ENSG00000129757 | 156.3178971 | 10.22037267 | 3.925340726  | 5.00E-11 | 6.19E-10 | CDKN1C     |
| ENSG00000163655 | 784.0815924 | 1864.651587 | -1.24989474  | 5.02E-11 | 6.21E-10 | GMPS       |
| ENSG00000278730 | 529.7651102 | 104.3637665 | 2.340941464  | 5.15E-11 | 6.37E-10 | AC005332.6 |
| ENSG00000112319 | 2.763920295 | 206.8287301 | -6.233624686 | 5.17E-11 | 6.39E-10 | EYA4       |
| ENSG00000184481 | 1082.925268 | 158.4375393 | 2.774591711  | 5.21E-11 | 6.44E-10 | FOXO4      |
| ENSG00000172348 | 262.4413914 | 9.438786619 | 4.787294721  | 5.23E-11 | 6.46E-10 | RCAN2      |
| ENSG00000105974 | 606.4142779 | 11103.92141 | -4.194720987 | 5.40E-11 | 6.67E-10 | CAV1       |
| ENSG00000125651 | 1129.908335 | 2630.578379 | -1.219106852 | 5.41E-11 | 6.67E-10 | GTF2F1     |
| ENSG00000003400 | 227.6403125 | 20.93421918 | 3.433142078  | 5.49E-11 | 6.77E-10 | CASP10     |
| ENSG00000130635 | 6901.286633 | 21637.07342 | -1.648571088 | 5.55E-11 | 6.84E-10 | COL5A1     |
| ENSG00000184669 | 118.1688645 | 0           | 9.218167222  | 5.60E-11 | 6.90E-10 | OR7E14P    |
| ENSG00000110917 | 2144.718897 | 5503.143239 | -1.359478786 | 5.61E-11 | 6.91E-10 | MLEC       |
| ENSG00000083520 | 613.5498484 | 1351.519048 | -1.139194758 | 5.64E-11 | 6.94E-10 | DIS3       |
| ENSG00000256268 | 0.616711807 | 99.18487314 | -7.352181622 | 5.72E-11 | 7.04E-10 | LINC02454  |
| ENSG00000149782 | 525.5821258 | 1463.254364 | -1.476974771 | 5.81E-11 | 7.15E-10 | PLCB3      |
| ENSG00000116871 | 2689.33521  | 5812.910085 | -1.112012885 | 5.83E-11 | 7.17E-10 | MAP7D1     |
| ENSG00000185418 | 857.5655922 | 254.1960118 | 1.755251115  | 5.85E-11 | 7.19E-10 | TARSL2     |
| ENSG00000169710 | 2222.083    | 5768.722478 | -1.376326312 | 5.97E-11 | 7.34E-10 | FASN       |
| ENSG00000164463 | 745.751534  | 155.1844401 | 2.266041179  | 5.98E-11 | 7.34E-10 | CREBRF     |
| ENSG00000166501 | 139.587583  | 0           | 9.458527829  | 6.01E-11 | 7.38E-10 | PRKCB      |
| ENSG00000154655 | 84.85275073 | 1.548882377 | 5.861340868  | 6.13E-11 | 7.52E-10 | L3MBTL4    |
| ENSG00000129158 | 344.2730249 | 95.21720201 | 1.854435416  | 6.17E-11 | 7.56E-10 | SERGEF     |
| ENSG00000173456 | 344.2801904 | 1194.410881 | -1.794899954 | 6.21E-11 | 7.61E-10 | RNF26      |
| ENSG00000264456 | 68.25411391 | 4.391737868 | 3.976511077  | 6.23E-11 | 7.63E-10 | AC138207.4 |
| ENSG00000280339 | 101.7680914 | 11.07740199 | 3.196344904  | 6.28E-11 | 7.69E-10 | AP001528.3 |
| ENSG00000183742 | 76.39841391 | 2.731897526 | 4.757086132  | 6.29E-11 | 7.69E-10 | MACC1      |
| ENSG00000204147 | 40.29988772 | 178.6420787 | -2.148898961 | 6.30E-11 | 7.71E-10 | ASAH2B     |
| ENSG00000113749 | 128.3688986 | 1.365948763 | 6.503486949  | 6.32E-11 | 7.73E-10 | HRH2       |
| ENSG00000146006 | 80.62101655 | 4.992702053 | 4.00770548   | 6.44E-11 | 7.87E-10 | LRRTM2     |
| ENSG00000215861 | 21.90168905 | 199.6161796 | -3.184520179 | 6.48E-11 | 7.92E-10 | AC245297.1 |
| ENSG00000096060 | 596.4093463 | 4793.669855 | -3.006855592 | 6.49E-11 | 7.93E-10 | FKBP5      |
| ENSG00000113361 | 1413.917196 | 24.15496705 | 5.866891166  | 6.50E-11 | 7.93E-10 | CDH6       |
| ENSG00000178033 | 1328.925185 | 313.7376205 | 2.08190366   | 6.63E-11 | 8.09E-10 | CALHM5     |
| ENSG00000286699 | 107.9747571 | 10.97705651 | 3.290253732  | 6.71E-11 | 8.18E-10 | AC084198.2 |
| ENSG00000278058 | 63.41243471 | 0           | 8.320737283  | 6.72E-11 | 8.19E-10 | AC009159.3 |
| ENSG00000186908 | 1540.712018 | 542.4339755 | 1.506205293  | 6.74E-11 | 8.21E-10 | ZDHHC17    |
| ENSG00000237928 | 104.5872007 | 0           | 9.041987676  | 6.76E-11 | 8.23E-10 | NFIA-AS2   |
| ENSG00000122012 | 144.8407024 | 0           | 9.511838806  | 6.81E-11 | 8.29E-10 | SV2C       |
| ENSG00000173200 | 116.3501133 | 5.606590473 | 4.359440865  | 6.88E-11 | 8.36E-10 | PARP15     |
| ENSG00000123560 | 28153.74409 | 34.40961732 | 9.675030326  | 6.91E-11 | 8.40E-10 | PLP1       |
| ENSG00000243335 | 653.4212434 | 243.6458473 | 1.422948684  | 6.96E-11 | 8.46E-10 | KCTD7      |
| ENSG00000064419 | 759.1379716 | 1642.217493 | -1.113204064 | 7.09E-11 | 8.62E-10 | TNPO3      |
| ENSG00000110422 | 2163.404785 | 604.9643172 | 1.837873217  | 7.22E-11 | 8.76E-10 | HIPK3      |
| ENSG00000176907 | 669.0391836 | 103.9613915 | 2.688069629  | 7.28E-11 | 8.83E-10 | TCIM       |

|                 |             |             |              |          |          |             |
|-----------------|-------------|-------------|--------------|----------|----------|-------------|
| ENSG00000121989 | 487.3413908 | 110.5935264 | 2.13790486   | 7.32E-11 | 8.87E-10 | ACVR2A      |
| ENSG00000178235 | 113.0061225 | 0.336469917 | 8.19215257   | 7.37E-11 | 8.93E-10 | SLITRK1     |
| ENSG00000178722 | 87.99598706 | 0           | 8.793481373  | 7.43E-11 | 9.00E-10 | C5orf64     |
| ENSG00000163701 | 267.7409562 | 43.42305293 | 2.622163499  | 7.43E-11 | 9.00E-10 | IL17RE      |
| ENSG00000214706 | 356.4829791 | 1381.622812 | -1.954711685 | 7.55E-11 | 9.14E-10 | IFRD2       |
| ENSG00000233429 | 66.9655294  | 337.5903952 | -2.334707985 | 7.56E-11 | 9.15E-10 | HOTAIRM1    |
| ENSG00000198851 | 162.1555169 | 0           | 9.674782145  | 7.57E-11 | 9.16E-10 | CD3E        |
| ENSG00000100029 | 994.1790125 | 2944.107701 | -1.566272775 | 7.57E-11 | 9.16E-10 | PES1        |
| ENSG00000125648 | 1365.687747 | 417.8025555 | 1.70942476   | 7.62E-11 | 9.21E-10 | SLC25A23    |
| ENSG00000266964 | 99.79199343 | 0           | 8.975052968  | 7.69E-11 | 9.28E-10 | FXYP1       |
| ENSG00000231817 | 67.48381551 | 0           | 8.410662024  | 7.72E-11 | 9.32E-10 | LINC01198   |
| ENSG00000196466 | 143.5391983 | 36.15880547 | 1.987706177  | 7.75E-11 | 9.36E-10 | ZNF799      |
| ENSG00000176454 | 329.8419125 | 936.1433254 | -1.504595311 | 7.76E-11 | 9.36E-10 | LPCAT4      |
| ENSG00000169442 | 140.2406506 | 0           | 9.465267315  | 7.98E-11 | 9.62E-10 | CD52        |
| ENSG00000162851 | 125.5918727 | 397.6114664 | -1.663441383 | 8.02E-11 | 9.67E-10 | TFB2M       |
| ENSG00000158769 | 287.7859843 | 81.16946631 | 1.827825815  | 8.05E-11 | 9.70E-10 | F11R        |
| ENSG00000166394 | 2825.476692 | 145.3566947 | 4.279662487  | 8.23E-11 | 9.90E-10 | CYB5R2      |
| ENSG00000106290 | 314.5677457 | 796.5267009 | -1.340179417 | 8.31E-11 | 1.00E-09 | TAF6        |
| ENSG00000248429 | 324.4827458 | 16.25676207 | 4.308786001  | 8.34E-11 | 1.00E-09 | FAM198B-AS1 |
| ENSG00000169087 | 393.4759156 | 130.3609467 | 1.593265625  | 8.34E-11 | 1.00E-09 | HSPBAP1     |
| ENSG00000187513 | 117.761228  | 0.336469917 | 8.251338161  | 8.35E-11 | 1.00E-09 | GJA4        |
| ENSG00000205632 | 111.5678271 | 0           | 9.135774295  | 8.36E-11 | 1.00E-09 | LINC01310   |
| novel.83        | 0           | 175.469676  | -10.03568556 | 8.38E-11 | 1.01E-09 | -           |
| ENSG00000152256 | 101.9619376 | 778.1542033 | -2.931897554 | 8.39E-11 | 1.01E-09 | PDK1        |
| ENSG00000165072 | 277.0283997 | 26.26197848 | 3.399458291  | 8.44E-11 | 1.01E-09 | MAMDC2      |
| ENSG00000266709 | 3.928036872 | 77.99784652 | -4.312115163 | 8.48E-11 | 1.02E-09 | AC005224.3  |
| ENSG00000139793 | 2775.215191 | 747.4672743 | 1.892235721  | 8.65E-11 | 1.04E-09 | MBNL2       |
| ENSG00000126264 | 118.7140185 | 0.336469917 | 8.262956698  | 8.77E-11 | 1.05E-09 | HCST        |
| ENSG00000280304 | 89.06586582 | 1.029478846 | 6.380607403  | 8.82E-11 | 1.06E-09 | AC104260.2  |
| ENSG00000175538 | 163.4502709 | 15.41967345 | 3.395177479  | 8.82E-11 | 1.06E-09 | KCNE3       |
| ENSG00000280237 | 451.0357183 | 18.72976913 | 4.594942397  | 8.84E-11 | 1.06E-09 | MIR4697HG   |
| ENSG00000172269 | 387.7516784 | 986.0501144 | -1.34658158  | 9.01E-11 | 1.08E-09 | DPAGT1      |
| ENSG00000146005 | 70.8744768  | 1.365948763 | 5.638262421  | 9.05E-11 | 1.08E-09 | PSD2        |
| ENSG00000136824 | 258.4839949 | 1082.409049 | -2.066567855 | 9.11E-11 | 1.09E-09 | SMC2        |
| ENSG00000152767 | 237.9458245 | 1127.380339 | -2.244220287 | 9.12E-11 | 1.09E-09 | FARP1       |
| ENSG00000112562 | 1725.016163 | 0           | 13.08608351  | 9.15E-11 | 1.09E-09 | SMOC2       |
| ENSG00000136156 | 15791.56171 | 4304.129817 | 1.875319293  | 9.21E-11 | 1.10E-09 | ITM2B       |
| ENSG00000168004 | 129.3908269 | 0.336469917 | 8.387830621  | 9.27E-11 | 1.11E-09 | PLAAT5      |
| ENSG00000146386 | 128.8118945 | 623.7485152 | -2.276178418 | 9.31E-11 | 1.11E-09 | ABRACL      |
| ENSG00000244119 | 91.63948736 | 1.029478846 | 6.422280013  | 9.56E-11 | 1.14E-09 | PDCL3P4     |
| ENSG00000116824 | 150.7600673 | 0           | 9.569641781  | 9.66E-11 | 1.15E-09 | CD2         |
| ENSG00000124006 | 4675.181423 | 1428.079415 | 1.71091867   | 9.69E-11 | 1.15E-09 | OBSL1       |
| ENSG00000260244 | 132.7579098 | 0.336469917 | 8.424258665  | 9.83E-11 | 1.17E-09 | AC104083.1  |
| ENSG00000106819 | 480.8806846 | 2.476859868 | 7.593852061  | 9.89E-11 | 1.18E-09 | ASPEN       |
| ENSG00000136518 | 444.4220812 | 1095.095015 | -1.301276683 | 9.90E-11 | 1.18E-09 | ACTL6A      |
| ENSG00000151725 | 86.69067784 | 633.6938277 | -2.869008559 | 9.92E-11 | 1.18E-09 | CENPU       |
| ENSG00000106462 | 133.5993543 | 615.5980973 | -2.203604445 | 9.94E-11 | 1.18E-09 | EZH2        |
| ENSG00000244694 | 198.9356324 | 29.65376321 | 2.74860316   | 1.03E-10 | 1.22E-09 | PTCHD4      |
| ENSG00000228232 | 50.15746126 | 314.7887442 | -2.650244962 | 1.04E-10 | 1.24E-09 | GAPDHP1     |
| ENSG00000007255 | 267.7895482 | 65.4193591  | 2.033770196  | 1.06E-10 | 1.26E-09 | TRAPPC6A    |
| ENSG00000072682 | 589.3912698 | 6750.314646 | -3.517637654 | 1.09E-10 | 1.29E-09 | P4HA2       |

|                 |             |             |              |          |          |                |
|-----------------|-------------|-------------|--------------|----------|----------|----------------|
| ENSG00000164877 | 6896.423995 | 916.8595024 | 2.9110284    | 1.11E-10 | 1.32E-09 | MICALL2        |
| ENSG00000071626 | 1839.106157 | 4220.410416 | -1.198363396 | 1.12E-10 | 1.33E-09 | DAZAP1         |
| ENSG00000180425 | 145.1577358 | 27.30091394 | 2.411129411  | 1.13E-10 | 1.33E-09 | C11orf71       |
| ENSG00000074527 | 2883.986409 | 226.400609  | 3.670254755  | 1.13E-10 | 1.33E-09 | NTN4           |
| ENSG00000164823 | 1017.972991 | 365.4595712 | 1.477564488  | 1.13E-10 | 1.33E-09 | OSGIN2         |
| ENSG00000163069 | 6101.048648 | 2274.143989 | 1.423671077  | 1.13E-10 | 1.34E-09 | SGCB           |
| ENSG00000188283 | 346.5384052 | 116.2672123 | 1.5747103    | 1.14E-10 | 1.34E-09 | ZNF383         |
| novel.629       | 161.7526548 | 27.10967959 | 2.574743237  | 1.15E-10 | 1.36E-09 | -              |
| ENSG00000224307 | 69.47933145 | 0           | 8.451765819  | 1.17E-10 | 1.38E-09 | AL161785.1     |
| ENSG00000127903 | 71.88167277 | 1.029478846 | 6.067992122  | 1.19E-10 | 1.41E-09 | ZNF835         |
| ENSG00000108518 | 5895.447165 | 19556.341   | -1.729964124 | 1.21E-10 | 1.42E-09 | PFN1           |
| ENSG00000103035 | 376.2001631 | 1194.753036 | -1.667383827 | 1.22E-10 | 1.44E-09 | PSMD7          |
| ENSG00000145685 | 2286.323115 | 993.8012853 | 1.201826699  | 1.23E-10 | 1.45E-09 | LHFPL2         |
| ENSG00000101439 | 22137.53724 | 5314.003729 | 2.058567513  | 1.27E-10 | 1.50E-09 | CST3           |
| ENSG00000106952 | 133.413556  | 0.774441189 | 7.522469073  | 1.27E-10 | 1.50E-09 | TNFSF8         |
| ENSG00000267121 | 193.9680895 | 47.7851367  | 2.021523115  | 1.29E-10 | 1.51E-09 | AC008105.3     |
| ENSG00000134697 | 772.9884161 | 1866.070212 | -1.271550812 | 1.30E-10 | 1.53E-09 | GNL2           |
| ENSG00000272894 | 75.75000487 | 3.52640781  | 4.409749552  | 1.32E-10 | 1.55E-09 | AC004982.2     |
| ENSG00000148798 | 1.200686205 | 133.4609292 | -6.787613258 | 1.33E-10 | 1.56E-09 | INA            |
| ENSG00000154473 | 1080.683065 | 2917.224757 | -1.432774995 | 1.33E-10 | 1.56E-09 | BUB3           |
| ENSG00000187942 | 163.8487915 | 14.17760689 | 3.525793188  | 1.33E-10 | 1.57E-09 | LDLRAD2        |
| ENSG00000164035 | 483.7074319 | 7.603029127 | 5.979906586  | 1.34E-10 | 1.58E-09 | EMCN           |
| ENSG00000166923 | 0           | 54.70551259 | -8.353571899 | 1.34E-10 | 1.58E-09 | GREM1          |
| ENSG00000130517 | 1594.736399 | 456.6737033 | 1.804826925  | 1.35E-10 | 1.58E-09 | PGPEP1         |
| ENSG00000196323 | 1510.885336 | 344.4265819 | 2.13357533   | 1.36E-10 | 1.59E-09 | ZBTB44         |
| ENSG00000102385 | 8181.323734 | 226.7189583 | 5.173805465  | 1.38E-10 | 1.62E-09 | DRP2           |
| ENSG00000125166 | 804.3656691 | 2146.884345 | -1.416306771 | 1.39E-10 | 1.62E-09 | GOT2           |
| ENSG00000148677 | 9.774262555 | 7454.368267 | -9.575579668 | 1.39E-10 | 1.63E-09 | ANKRD1         |
| ENSG00000172508 | 170.5032379 | 28.1861847  | 2.604849672  | 1.40E-10 | 1.64E-09 | CARNS1         |
| ENSG00000101084 | 206.4853163 | 656.2961408 | -1.668971097 | 1.40E-10 | 1.64E-09 | RAB51F         |
| ENSG00000140848 | 1277.84058  | 390.5959637 | 1.709993894  | 1.41E-10 | 1.65E-09 | CPNE2          |
| ENSG00000235257 | 293.6223234 | 48.76044442 | 2.586411226  | 1.42E-10 | 1.66E-09 | ITGA9-AS1      |
| ENSG00000178700 | 283.9494211 | 99.57838669 | 1.511084182  | 1.43E-10 | 1.67E-09 | DHFR2          |
| ENSG00000113494 | 152.5716129 | 8.264072205 | 4.207274346  | 1.44E-10 | 1.69E-09 | PRLR           |
| ENSG00000074657 | 2182.165987 | 900.159572  | 1.277708256  | 1.45E-10 | 1.69E-09 | ZNF532         |
| ENSG00000213430 | 13.60150863 | 87.8210284  | -2.690703352 | 1.47E-10 | 1.72E-09 | HSPD1P1        |
| ENSG00000257702 | 347.1155419 | 48.92459321 | 2.822785111  | 1.48E-10 | 1.73E-09 | LBX2-AS1       |
| ENSG00000286214 | 195.8760631 | 8.286581446 | 4.545609327  | 1.50E-10 | 1.74E-09 | AUXG01000058.1 |
| ENSG00000129993 | 87.75299092 | 0           | 8.788719575  | 1.51E-10 | 1.76E-09 | CBFA2T3        |
| ENSG00000101347 | 13286.06473 | 2166.371717 | 2.616578457  | 1.52E-10 | 1.76E-09 | SAMHD1         |
| ENSG00000072501 | 1003.957163 | 2686.916234 | -1.420230849 | 1.52E-10 | 1.76E-09 | SMC1A          |
| ENSG00000236283 | 160.0135253 | 0.672939833 | 7.816418394  | 1.52E-10 | 1.77E-09 | AC019197.1     |
| ENSG00000236345 | 2.40137241  | 70.59242623 | -4.86852109  | 1.55E-10 | 1.80E-09 | SCAT8          |
| ENSG00000196961 | 1593.576865 | 4870.503623 | -1.611824124 | 1.59E-10 | 1.85E-09 | AP2A1          |
| ENSG00000174684 | 1906.996596 | 881.7485626 | 1.113020176  | 1.66E-10 | 1.93E-09 | B4GAT1         |
| ENSG00000131620 | 96.0709084  | 2.11916498  | 5.486991517  | 1.68E-10 | 1.95E-09 | ANO1           |
| ENSG00000163406 | 130.0415572 | 7.277171696 | 4.138943788  | 1.70E-10 | 1.97E-09 | SLC15A2        |
| ENSG00000119812 | 762.2699811 | 2169.251876 | -1.508972982 | 1.71E-10 | 1.98E-09 | FAM98A         |
| ENSG00000099985 | 250.6300595 | 1.161661783 | 7.82122668   | 1.71E-10 | 1.99E-09 | OSM            |
| ENSG00000153446 | 614.3627508 | 5.900610448 | 6.691664316  | 1.72E-10 | 1.99E-09 | C16orf89       |
| ENSG00000153132 | 7.222993233 | 138.2470797 | -4.254424826 | 1.73E-10 | 2.01E-09 | CLGN           |

|                 |             |             |              |          |          |            |
|-----------------|-------------|-------------|--------------|----------|----------|------------|
| ENSG00000134755 | 109.6169992 | 0.336469917 | 8.147899795  | 1.74E-10 | 2.01E-09 | DSC2       |
| ENSG00000186847 | 163.8474791 | 1.702418679 | 6.544067047  | 1.76E-10 | 2.03E-09 | KRT14      |
| ENSG00000127377 | 173.5846606 | 0.336469917 | 8.81160165   | 1.76E-10 | 2.04E-09 | CRYGN      |
| ENSG00000229809 | 492.3924735 | 163.0414453 | 1.594741769  | 1.76E-10 | 2.04E-09 | ZNF688     |
| ENSG00000102265 | 5139.388931 | 36577.0923  | -2.831284323 | 1.77E-10 | 2.04E-09 | TIMP1      |
| ENSG00000127423 | 7.59306301  | 68.95548031 | -3.1870153   | 1.78E-10 | 2.05E-09 | AUNIP      |
| ENSG00000260001 | 3.620934617 | 97.1692173  | -4.742115125 | 1.78E-10 | 2.06E-09 | TGFBR3L    |
| ENSG00000161955 | 203.0501362 | 30.21831362 | 2.740842393  | 1.79E-10 | 2.07E-09 | TNFSF13    |
| ENSG00000261121 | 127.7810374 | 0           | 9.331573585  | 1.80E-10 | 2.07E-09 | LINC02473  |
| ENSG00000167994 | 1144.537333 | 119.1145629 | 3.264271333  | 1.81E-10 | 2.09E-09 | RAB31L1    |
| ENSG00000235927 | 3.969621095 | 63.03834961 | -3.9967375   | 1.82E-10 | 2.10E-09 | NEXN-AS1   |
| ENSG00000158290 | 1370.610103 | 5052.74307  | -1.88218044  | 1.83E-10 | 2.11E-09 | CUL4B      |
| ENSG00000267221 | 99.81018525 | 5.371621912 | 4.21510032   | 1.84E-10 | 2.12E-09 | C17orf113  |
| ENSG00000169230 | 589.4456749 | 1843.100119 | -1.644931145 | 1.84E-10 | 2.12E-09 | PRELID1    |
| ENSG00000096384 | 10503.58477 | 27887.31693 | -1.408738535 | 1.85E-10 | 2.13E-09 | HSP90AB1   |
| ENSG00000173545 | 434.6779059 | 1048.774375 | -1.270897212 | 1.87E-10 | 2.15E-09 | ZNF622     |
| ENSG00000145832 | 95.83983653 | 0           | 8.915932077  | 1.88E-10 | 2.16E-09 | SLC25A48   |
| ENSG00000181019 | 474.9695427 | 3426.037907 | -2.850788781 | 1.89E-10 | 2.17E-09 | NQO1       |
| ENSG00000153989 | 834.0185244 | 1861.320416 | -1.158110391 | 1.89E-10 | 2.17E-09 | NUS1       |
| novel.120       | 120.6279203 | 0.693008929 | 7.399312688  | 1.92E-10 | 2.20E-09 | -          |
| ENSG00000139131 | 172.016041  | 458.1124921 | -1.413498771 | 1.92E-10 | 2.20E-09 | YARS2      |
| ENSG00000100156 | 125.3894369 | 13.21663607 | 3.24373925   | 1.93E-10 | 2.22E-09 | SLC16A8    |
| ENSG00000166197 | 1126.024019 | 3062.450155 | -1.443592609 | 1.95E-10 | 2.23E-09 | NOLC1      |
| ENSG00000279688 | 113.849461  | 0.774441189 | 7.296778733  | 1.95E-10 | 2.23E-09 | AQP7P3     |
| ENSG00000147853 | 2754.412198 | 1288.063532 | 1.096489432  | 1.96E-10 | 2.24E-09 | AK3        |
| ENSG00000138777 | 491.8854274 | 1282.539354 | -1.382786833 | 1.96E-10 | 2.24E-09 | PPA2       |
| ENSG00000140254 | 79.37065476 | 0           | 8.644802517  | 1.96E-10 | 2.25E-09 | DUOXA1     |
| ENSG00000222041 | 104.7885403 | 694.8026119 | -2.729291516 | 2.00E-10 | 2.28E-09 | CYTOR      |
| ENSG00000106638 | 565.1017137 | 1444.174375 | -1.353668285 | 2.00E-10 | 2.29E-09 | TBL2       |
| ENSG00000126749 | 370.7082945 | 1190.830747 | -1.683762167 | 2.08E-10 | 2.38E-09 | EMG1       |
| ENSG00000265743 | 57.65850901 | 0           | 8.182947969  | 2.09E-10 | 2.39E-09 | AC138207.5 |
| ENSG00000205795 | 389.4119962 | 19.7285664  | 4.306781078  | 2.10E-10 | 2.40E-09 | CYS1       |
| ENSG00000117682 | 391.2600412 | 877.6362167 | -1.165537814 | 2.10E-10 | 2.40E-09 | DHDDS      |
| ENSG00000167680 | 264.369511  | 38.05502704 | 2.791157789  | 2.12E-10 | 2.41E-09 | SEMA6B     |
| ENSG00000176170 | 1054.819876 | 3419.934406 | -1.696931616 | 2.12E-10 | 2.42E-09 | SPHK1      |
| ENSG00000076356 | 181.6277989 | 2029.648049 | -3.482272219 | 2.18E-10 | 2.49E-09 | PLXNA2     |
| ENSG00000096996 | 109.8083378 | 1.426156051 | 6.258824396  | 2.19E-10 | 2.49E-09 | IL12RB1    |
| ENSG00000179818 | 565.516717  | 135.9206394 | 2.055236858  | 2.21E-10 | 2.51E-09 | PCBP1-AS1  |
| ENSG00000144120 | 73.56428893 | 231.7808703 | -1.655918561 | 2.22E-10 | 2.53E-09 | TMEM177    |
| ENSG00000265798 | 56.66148443 | 0           | 8.157945613  | 2.23E-10 | 2.53E-09 | AC138207.6 |
| ENSG00000150938 | 1144.264593 | 12873.88367 | -3.492019185 | 2.23E-10 | 2.54E-09 | CRIM1      |
| ENSG00000278982 | 54.79254427 | 0           | 8.10966624   | 2.26E-10 | 2.57E-09 | AL139125.1 |
| ENSG00000198739 | 71.43283624 | 0           | 8.49176052   | 2.27E-10 | 2.58E-09 | LRRTM3     |
| ENSG00000197245 | 60.72931775 | 0           | 8.25779181   | 2.28E-10 | 2.59E-09 | FAM110D    |
| ENSG00000113212 | 140.734963  | 1.753169357 | 6.307225788  | 2.32E-10 | 2.64E-09 | PCDHB7     |
| ENSG00000163749 | 80.912363   | 2.191140629 | 5.224596349  | 2.34E-10 | 2.65E-09 | CCDC158    |
| ENSG00000179222 | 2500.306605 | 10008.06297 | -2.001015822 | 2.35E-10 | 2.67E-09 | MAGED1     |
| ENSG00000107862 | 1047.829862 | 3056.090354 | -1.544160429 | 2.36E-10 | 2.67E-09 | GBF1       |
| ENSG00000090530 | 271.9668053 | 862.2226137 | -1.664755704 | 2.38E-10 | 2.69E-09 | P3H2       |
| ENSG00000183684 | 622.809115  | 2120.886106 | -1.768000879 | 2.38E-10 | 2.70E-09 | ALYREF     |
| ENSG00000198796 | 0.922560414 | 94.55808517 | -6.697957999 | 2.41E-10 | 2.73E-09 | ALPK2      |

|                 |             |             |              |          |          |             |
|-----------------|-------------|-------------|--------------|----------|----------|-------------|
| ENSG00000123977 | 0.308355904 | 79.33499309 | -7.929246364 | 2.43E-10 | 2.75E-09 | DAW1        |
| ENSG00000108387 | 739.7769015 | 22.40855737 | 5.045899323  | 2.46E-10 | 2.78E-09 | SEPT4       |
| ENSG00000107736 | 295.1579758 | 24.98563432 | 3.568160588  | 2.48E-10 | 2.81E-09 | CDH23       |
| ENSG00000150637 | 99.33014934 | 3.781445468 | 4.681815897  | 2.48E-10 | 2.81E-09 | CD226       |
| ENSG00000189410 | 1.188078446 | 61.94609494 | -5.681416128 | 2.51E-10 | 2.83E-09 | SH2D5       |
| ENSG00000270127 | 116.288016  | 3.250145181 | 5.165598539  | 2.51E-10 | 2.84E-09 | AC027020.2  |
| ENSG00000113248 | 156.7081953 | 4.340987191 | 5.178231659  | 2.52E-10 | 2.84E-09 | PCDHB15     |
| novel.134       | 152.6330142 | 0           | 9.587936022  | 2.56E-10 | 2.89E-09 | -           |
| ENSG00000223552 | 69.27935951 | 0           | 8.447588705  | 2.57E-10 | 2.90E-09 | AC098613.1  |
| ENSG00000158352 | 196.1696328 | 45.65779938 | 2.100872327  | 2.60E-10 | 2.93E-09 | SHROOM4     |
| ENSG00000175170 | 67.82025024 | 2.435565801 | 4.767588318  | 2.63E-10 | 2.97E-09 | FAM182B     |
| ENSG00000270231 | 197.363837  | 537.1039047 | -1.443857589 | 2.63E-10 | 2.97E-09 | NBPF8       |
| ENSG00000198879 | 737.8506571 | 119.6817162 | 2.626398312  | 2.66E-10 | 3.00E-09 | SFMBT2      |
| ENSG00000169372 | 204.0000631 | 1164.062722 | -2.512759805 | 2.66E-10 | 3.00E-09 | CRADD       |
| ENSG00000113140 | 112574.4543 | 40908.94548 | 1.460382542  | 2.67E-10 | 3.01E-09 | SPARC       |
| ENSG00000102302 | 76.01763076 | 348.0211126 | -2.195039429 | 2.70E-10 | 3.03E-09 | FGD1        |
| ENSG00000104177 | 766.1946443 | 193.9795495 | 1.982641147  | 2.70E-10 | 3.03E-09 | MYEF2       |
| ENSG00000198498 | 192.9729596 | 517.8475057 | -1.424703436 | 2.72E-10 | 3.06E-09 | TMA16       |
| ENSG00000023734 | 1143.013381 | 3554.025211 | -1.636744446 | 2.78E-10 | 3.12E-09 | STRAP       |
| ENSG00000100479 | 32.77842558 | 213.3617698 | -2.701076151 | 2.79E-10 | 3.13E-09 | POLE2       |
| ENSG00000076003 | 283.4686022 | 1592.556733 | -2.490283222 | 2.80E-10 | 3.14E-09 | MCM6        |
| ENSG00000167528 | 795.3404641 | 84.03436432 | 3.2397176    | 2.81E-10 | 3.15E-09 | ZNF641      |
| ENSG00000144136 | 625.1134732 | 4073.095307 | -2.703964235 | 2.81E-10 | 3.15E-09 | SLC20A1     |
| ENSG00000168502 | 280.9307239 | 750.0846182 | -1.417324398 | 2.83E-10 | 3.17E-09 | MTCL1       |
| ENSG00000180644 | 76.38533543 | 0           | 8.588516176  | 2.85E-10 | 3.20E-09 | PRF1        |
| novel.687       | 2.738704777 | 110.3580099 | -5.337494206 | 2.87E-10 | 3.21E-09 | -           |
| ENSG00000131171 | 3180.104029 | 1267.866557 | 1.326712495  | 2.93E-10 | 3.28E-09 | SH3BGRL     |
| ENSG00000161405 | 155.8196259 | 1.060160428 | 7.184009893  | 2.98E-10 | 3.33E-09 | IKZF3       |
| ENSG00000124541 | 467.2062136 | 1238.229421 | -1.406431545 | 3.01E-10 | 3.36E-09 | RRP36       |
| ENSG00000212864 | 162.5580835 | 31.58156545 | 2.368594331  | 3.11E-10 | 3.48E-09 | RNF208      |
| ENSG00000183715 | 100.6663454 | 0           | 8.987625393  | 3.13E-10 | 3.49E-09 | OPCML       |
| ENSG00000125864 | 6.704493655 | 88.0995556  | -3.719855222 | 3.15E-10 | 3.52E-09 | BFSP1       |
| ENSG00000224209 | 60.17758256 | 0           | 8.24543957   | 3.16E-10 | 3.53E-09 | LINC00466   |
| ENSG00000176402 | 181.8003178 | 0.336469917 | 8.877982053  | 3.16E-10 | 3.53E-09 | GJC3        |
| ENSG00000176124 | 277.2453981 | 35.71394613 | 2.950421723  | 3.17E-10 | 3.54E-09 | DLEU1       |
| ENSG00000148826 | 121.4337058 | 0           | 9.257807738  | 3.22E-10 | 3.59E-09 | NKX6-2      |
| ENSG00000172172 | 322.3433996 | 897.8765753 | -1.478167769 | 3.23E-10 | 3.60E-09 | MRPL13      |
| ENSG00000241644 | 743.6587947 | 8.519109863 | 6.445116349  | 3.23E-10 | 3.60E-09 | INMT        |
| novel.1011      | 1144.044515 | 0           | 12.49361882  | 3.24E-10 | 3.60E-09 | -           |
| ENSG00000146731 | 2131.853286 | 6613.417722 | -1.633342116 | 3.24E-10 | 3.61E-09 | CCT6A       |
| ENSG00000153107 | 354.1863013 | 920.2496989 | -1.377661232 | 3.25E-10 | 3.61E-09 | ANAPC1      |
| ENSG00000116815 | 361.6318318 | 138.5268568 | 1.384316545  | 3.25E-10 | 3.61E-09 | CD58        |
| ENSG00000137075 | 980.053092  | 384.9307882 | 1.348038374  | 3.26E-10 | 3.62E-09 | RNF38       |
| ENSG00000130518 | 421.6011848 | 14.80796839 | 4.833129549  | 3.26E-10 | 3.62E-09 | IQC�        |
| ENSG00000260314 | 73.29418323 | 0           | 8.528912504  | 3.27E-10 | 3.63E-09 | MRC1        |
| ENSG00000169282 | 220.6751297 | 43.99436301 | 2.325047796  | 3.33E-10 | 3.69E-09 | KCNAB1      |
| ENSG00000264707 | 54.99656189 | 0           | 8.114611614  | 3.34E-10 | 3.71E-09 | L3MBTL4-AS1 |
| ENSG00000143842 | 951.5908665 | 303.5336269 | 1.649134035  | 3.36E-10 | 3.72E-09 | SOX13       |
| ENSG00000245293 | 76.76744385 | 2.618499415 | 4.912640898  | 3.38E-10 | 3.75E-09 | AC096564.1  |
| ENSG00000078804 | 2481.501258 | 497.9536693 | 2.31756441   | 3.40E-10 | 3.77E-09 | TP53INP2    |
| ENSG00000225285 | 108.9809567 | 1.069617038 | 6.66316818   | 3.43E-10 | 3.80E-09 | LINC01770   |

|                 |             |             |              |          |          |            |
|-----------------|-------------|-------------|--------------|----------|----------|------------|
| ENSG00000178752 | 2.373649595 | 70.73072655 | -4.878458752 | 3.43E-10 | 3.80E-09 | ERFE       |
| ENSG00000278175 | 370.2329769 | 46.94103161 | 2.979485735  | 3.44E-10 | 3.81E-09 | GLIDR      |
| ENSG00000236849 | 88.70525576 | 0           | 8.805159461  | 3.48E-10 | 3.85E-09 | LINC01474  |
| ENSG00000239922 | 102.3641315 | 0           | 9.010994099  | 3.49E-10 | 3.86E-09 | AC092958.1 |
| ENSG00000117906 | 1318.86432  | 2786.665616 | -1.079291682 | 3.55E-10 | 3.92E-09 | RCN2       |
| ENSG00000197093 | 699.1407014 | 88.06010656 | 2.986185263  | 3.55E-10 | 3.92E-09 | GAL3ST4    |
| ENSG00000204843 | 1951.288868 | 4404.765801 | -1.174650626 | 3.55E-10 | 3.92E-09 | DCTN1      |
| ENSG00000134109 | 526.0889865 | 2036.04989  | -1.952195669 | 3.55E-10 | 3.92E-09 | EDEM1      |
| ENSG00000182054 | 677.8001204 | 2090.015372 | -1.624611814 | 3.59E-10 | 3.96E-09 | IDH2       |
| ENSG00000149294 | 7904.323766 | 270.1148316 | 4.871534252  | 3.64E-10 | 4.01E-09 | NCAM1      |
| ENSG00000125246 | 113.5055323 | 25.2938628  | 2.17007126   | 3.68E-10 | 4.05E-09 | CLYBL      |
| ENSG00000072958 | 1102.218915 | 2739.744723 | -1.313532625 | 3.73E-10 | 4.11E-09 | AP1M1      |
| ENSG00000182866 | 129.901361  | 0           | 9.354780709  | 3.73E-10 | 4.12E-09 | LCK        |
| ENSG00000286646 | 64.18280437 | 1.029478846 | 5.904768569  | 3.74E-10 | 4.12E-09 | AL121933.1 |
| ENSG00000120324 | 59.30949887 | 2.058957692 | 4.799022686  | 3.75E-10 | 4.13E-09 | PCDHB10    |
| ENSG00000165626 | 319.6578629 | 23.6165219  | 3.75094916   | 3.77E-10 | 4.15E-09 | BEND7      |
| ENSG00000137055 | 455.1978132 | 1013.883951 | -1.155530067 | 3.78E-10 | 4.16E-09 | PLAA       |
| ENSG00000236901 | 67.08874368 | 5.889869568 | 3.531621535  | 3.78E-10 | 4.16E-09 | MIR600HG   |
| ENSG00000138650 | 428.8315272 | 19.45256056 | 4.459247282  | 3.83E-10 | 4.21E-09 | PCDH10     |
| ENSG00000272720 | 95.92874719 | 10.45521283 | 3.20115046   | 3.92E-10 | 4.30E-09 | AL022322.1 |
| ENSG00000178498 | 983.6664049 | 384.2681228 | 1.356011956  | 3.93E-10 | 4.32E-09 | DTX3       |
| ENSG00000095139 | 2408.082351 | 6317.422976 | -1.391464846 | 3.95E-10 | 4.33E-09 | ARCN1      |
| ENSG00000135604 | 202.5358252 | 11.70203129 | 4.097464109  | 3.97E-10 | 4.36E-09 | STX11      |
| ENSG00000042753 | 1109.405991 | 4279.66865  | -1.947741601 | 4.01E-10 | 4.39E-09 | AP2S1      |
| ENSG00000114654 | 73.19582846 | 0           | 8.527059024  | 4.01E-10 | 4.40E-09 | EFCC1      |
| ENSG00000255366 | 77.15213013 | 1.00940975  | 6.178105877  | 4.04E-10 | 4.42E-09 | AC120036.4 |
| ENSG00000118729 | 92.72916759 | 0.672939833 | 7.021234855  | 4.05E-10 | 4.43E-09 | CASQ2      |
| ENSG00000071127 | 3901.272669 | 11076.27351 | -1.505490818 | 4.07E-10 | 4.45E-09 | WDR1       |
| ENSG00000113048 | 596.196839  | 1653.06978  | -1.471560845 | 4.09E-10 | 4.47E-09 | MRPS27     |
| ENSG00000165359 | 592.1462605 | 146.8819463 | 2.011214369  | 4.10E-10 | 4.49E-09 | INTS6L     |
| novel.759       | 61.00235767 | 0           | 8.26434275   | 4.13E-10 | 4.52E-09 | -          |
| ENSG00000232445 | 0           | 45.44289991 | -8.087607544 | 4.19E-10 | 4.58E-09 | AC006329.1 |
| ENSG00000253368 | 398.7896218 | 2234.184572 | -2.486301334 | 4.20E-10 | 4.59E-09 | TRNP1      |
| ENSG00000267374 | 1.83125942  | 53.8216545  | -4.88775646  | 4.24E-10 | 4.63E-09 | MIR924HG   |
| ENSG00000287342 | 55.13335285 | 0           | 8.119102331  | 4.36E-10 | 4.76E-09 | AC188616.1 |
| ENSG00000131467 | 1100.012113 | 3252.056671 | -1.563967533 | 4.40E-10 | 4.80E-09 | PSME3      |
| ENSG00000247809 | 392.3019283 | 64.03573421 | 2.616659434  | 4.43E-10 | 4.83E-09 | NR2F2-AS1  |
| ENSG00000234741 | 1511.641966 | 3427.661321 | -1.181154658 | 4.44E-10 | 4.84E-09 | GAS5       |
| ENSG00000254416 | 70.07094245 | 0           | 8.465097051  | 4.44E-10 | 4.84E-09 | AP000924.1 |
| ENSG00000162614 | 98.91816716 | 1147.653985 | -3.537013728 | 4.47E-10 | 4.87E-09 | NEXN       |
| ENSG00000163923 | 78.18210559 | 340.1509991 | -2.122246467 | 4.55E-10 | 4.95E-09 | RPL39L     |
| ENSG00000100220 | 747.9202684 | 2106.620316 | -1.494146451 | 4.57E-10 | 4.97E-09 | RTCB       |
| ENSG00000061273 | 1899.72202  | 4586.732771 | -1.271602617 | 4.61E-10 | 5.02E-09 | HDAC7      |
| ENSG00000166171 | 152.6953528 | 415.5638406 | -1.444474234 | 4.62E-10 | 5.02E-09 | DPCD       |
| ENSG00000144591 | 575.794491  | 1525.023622 | -1.405085849 | 4.68E-10 | 5.09E-09 | GMPPA      |
| ENSG00000171094 | 124.0468464 | 3.200550379 | 5.270698465  | 4.70E-10 | 5.11E-09 | ALK        |
| ENSG00000231574 | 0           | 84.17680891 | -8.975159056 | 4.71E-10 | 5.11E-09 | LINC02015  |
| ENSG00000092969 | 97.85441411 | 1331.370129 | -3.766723829 | 4.71E-10 | 5.11E-09 | TGFB2      |
| ENSG00000134871 | 9205.68849  | 27996.61107 | -1.604659517 | 4.73E-10 | 5.14E-09 | COL4A2     |
| ENSG00000080573 | 3248.441549 | 492.1233991 | 2.723090755  | 4.77E-10 | 5.17E-09 | COL5A3     |
| ENSG00000184845 | 70.82236485 | 0           | 8.480345966  | 4.78E-10 | 5.19E-09 | DRD1       |

|                 |             |             |              |          |          |               |
|-----------------|-------------|-------------|--------------|----------|----------|---------------|
| ENSG00000164344 | 121.5138402 | 0.387220594 | 8.297357943  | 4.80E-10 | 5.20E-09 | KLKB1         |
| novel.254       | 0.921306765 | 61.68519669 | -6.081817977 | 4.80E-10 | 5.21E-09 | -             |
| ENSG00000178980 | 5330.03131  | 2210.049975 | 1.270049976  | 4.81E-10 | 5.21E-09 | SELENOW       |
| ENSG00000101294 | 1820.381706 | 4694.250517 | -1.366618873 | 4.82E-10 | 5.22E-09 | HM13          |
| ENSG00000149571 | 118.6244118 | 9.835463823 | 3.58101028   | 4.83E-10 | 5.22E-09 | KIRREL3       |
| novel.869       | 80.92428658 | 2.679862578 | 4.975115022  | 4.85E-10 | 5.25E-09 | -             |
| ENSG00000108344 | 1539.250215 | 3684.475948 | -1.259173512 | 4.93E-10 | 5.33E-09 | PSMD3         |
| ENSG00000184117 | 378.4594445 | 1358.974449 | -1.844504154 | 4.98E-10 | 5.38E-09 | NIPSNAP1      |
| ENSG00000185345 | 84.23729257 | 11.96395702 | 2.822758198  | 5.00E-10 | 5.40E-09 | PRKN          |
| ENSG00000132906 | 401.8748784 | 142.2538272 | 1.499239797  | 5.00E-10 | 5.40E-09 | CASP9         |
| ENSG00000120738 | 15877.76892 | 467.1769008 | 5.086812414  | 5.01E-10 | 5.40E-09 | EGR1          |
| ENSG00000147874 | 377.2754277 | 899.0505871 | -1.252572582 | 5.08E-10 | 5.49E-09 | HAUS6         |
| ENSG00000189001 | 0           | 113.8761857 | -9.411606644 | 5.18E-10 | 5.59E-09 | SBSN          |
| ENSG00000139508 | 476.0235238 | 87.70300679 | 2.43978965   | 5.24E-10 | 5.65E-09 | SLC46A3       |
| ENSG00000175662 | 5594.555075 | 1105.176526 | 2.33974966   | 5.25E-10 | 5.66E-09 | TOM1L2        |
| ENSG00000150967 | 58.64235602 | 223.9489428 | -1.932551723 | 5.27E-10 | 5.68E-09 | ABCB9         |
| ENSG00000105255 | 61.5742663  | 629.5718246 | -3.352522881 | 5.28E-10 | 5.68E-09 | FSD1          |
| ENSG00000140749 | 49.95573712 | 0           | 7.976318216  | 5.29E-10 | 5.69E-09 | IGSF6         |
| ENSG00000145649 | 153.6640692 | 0           | 9.597199364  | 5.32E-10 | 5.73E-09 | GZMA          |
| ENSG00000151612 | 64.68919439 | 436.5396791 | -2.755316469 | 5.33E-10 | 5.73E-09 | ZNF827        |
| ENSG00000136014 | 166.4827032 | 2.415496705 | 6.079294621  | 5.43E-10 | 5.84E-09 | USP44         |
| ENSG00000250366 | 62.98530964 | 0           | 8.311329664  | 5.49E-10 | 5.89E-09 | TUNAR         |
| ENSG00000265298 | 142.928114  | 29.91941336 | 2.258626424  | 5.52E-10 | 5.93E-09 | AC132812.1    |
| ENSG00000031003 | 766.356647  | 229.6347822 | 1.738529836  | 5.59E-10 | 6.00E-09 | FAM13B        |
| ENSG00000155085 | 171.9485292 | 30.47437876 | 2.491713665  | 5.62E-10 | 6.03E-09 | AK9           |
| ENSG00000152804 | 333.6301088 | 31.88362937 | 3.394166024  | 5.64E-10 | 6.05E-09 | HHEX          |
| ENSG00000170485 | 68.29690869 | 1125.473296 | -4.043199906 | 5.66E-10 | 6.07E-09 | NPAS2         |
| ENSG00000136169 | 486.413831  | 184.2439644 | 1.399491656  | 5.81E-10 | 6.22E-09 | SETDB2        |
| ENSG00000180818 | 0           | 127.7472933 | -9.579027156 | 5.85E-10 | 6.27E-09 | HOXC10        |
| ENSG00000197632 | 0.61420451  | 8180.39495  | -13.70812804 | 5.87E-10 | 6.28E-09 | SERPINB2      |
| ENSG00000147140 | 3111.407246 | 8068.845747 | -1.374842588 | 5.90E-10 | 6.32E-09 | NONO          |
| ENSG00000171316 | 1482.702877 | 211.2621472 | 2.811555253  | 5.92E-10 | 6.33E-09 | CHD7          |
| ENSG00000184343 | 101.1611956 | 14.17516674 | 2.843098878  | 5.97E-10 | 6.39E-09 | SRPK3         |
| ENSG00000141101 | 343.7187111 | 941.0353568 | -1.453216501 | 6.00E-10 | 6.42E-09 | NOB1          |
| ENSG00000172197 | 265.310066  | 36.72091573 | 2.848986495  | 6.02E-10 | 6.43E-09 | MBOAT1        |
| ENSG00000004142 | 1182.097427 | 2774.439875 | -1.230871485 | 6.02E-10 | 6.43E-09 | POLDIP2       |
| ENSG00000157017 | 79.00616869 | 2.537067156 | 4.969415952  | 6.08E-10 | 6.49E-09 | GHRL          |
| novel.170       | 146.301066  | 1.049547942 | 7.096496538  | 6.08E-10 | 6.49E-09 | -             |
| ENSG00000131828 | 810.3088262 | 1753.61815  | -1.113726775 | 6.16E-10 | 6.57E-09 | PDHA1         |
| ENSG00000164465 | 242.5531413 | 1422.815794 | -2.552540795 | 6.16E-10 | 6.57E-09 | DCBLD1        |
| novel.137       | 55.21637875 | 0           | 8.121084793  | 6.16E-10 | 6.57E-09 | -             |
| ENSG00000262370 | 50.01250767 | 0           | 7.977817729  | 6.18E-10 | 6.59E-09 | AC108134.3    |
| ENSG00000253671 | 98.16160359 | 0           | 8.951280731  | 6.39E-10 | 6.80E-09 | AC027117.1    |
| ENSG00000168970 | 166.5657848 | 40.20346094 | 2.05117228   | 6.41E-10 | 6.83E-09 | JMJD7-PLA2G4B |
| ENSG00000118526 | 5.541630725 | 194.24213   | -5.138680332 | 6.43E-10 | 6.84E-09 | TCF21         |
| ENSG00000185614 | 310.3649449 | 75.30770978 | 2.046437556  | 6.48E-10 | 6.89E-09 | INKA1         |
| ENSG00000172086 | 1166.049799 | 502.489371  | 1.214076832  | 6.48E-10 | 6.89E-09 | KRCC1         |
| ENSG00000086288 | 57.68727166 | 0           | 8.183689742  | 6.48E-10 | 6.89E-09 | NME8          |
| novel.1114      | 67.98211417 | 2.954969332 | 4.551502949  | 6.49E-10 | 6.90E-09 | -             |
| ENSG00000136710 | 1024.655472 | 388.0278297 | 1.401075474  | 6.50E-10 | 6.91E-09 | CCDC115       |
| ENSG00000109047 | 51.60597187 | 0           | 8.022913656  | 6.52E-10 | 6.92E-09 | RCVRN         |



|                 |             |             |              |          |          |            |
|-----------------|-------------|-------------|--------------|----------|----------|------------|
| ENSG00000286248 | 86.26880867 | 0.774441189 | 6.898797901  | 6.67E-10 | 7.08E-09 | AC069209.2 |
| ENSG00000111711 | 808.0188429 | 1871.071528 | -1.211335167 | 6.69E-10 | 7.10E-09 | GOLT1B     |
| ENSG00000121895 | 101.8631559 | 767.2563957 | -2.912421361 | 6.85E-10 | 7.27E-09 | TMEM156    |
| ENSG00000197136 | 740.5671397 | 1829.032579 | -1.304265502 | 6.89E-10 | 7.31E-09 | PCNX3      |
| ENSG00000112852 | 93.38244903 | 2.0188195   | 5.472723805  | 6.91E-10 | 7.33E-09 | PCDHB2     |
| ENSG00000152684 | 411.22616   | 1250.105769 | -1.604144914 | 7.03E-10 | 7.45E-09 | PELO       |
| ENSG00000174851 | 1039.302984 | 2556.575559 | -1.298518273 | 7.12E-10 | 7.54E-09 | YIF1A      |
| ENSG00000178026 | 428.4801746 | 116.1664816 | 1.884241639  | 7.13E-10 | 7.55E-09 | LRRC75B    |
| ENSG00000103005 | 587.6632097 | 1841.167501 | -1.647334638 | 7.13E-10 | 7.55E-09 | USB1       |
| ENSG00000100625 | 21.46406408 | 386.1282686 | -4.171354206 | 7.18E-10 | 7.59E-09 | SIX4       |
| novel.644       | 69.60315864 | 285.6236214 | -2.036018452 | 7.20E-10 | 7.61E-09 | -          |
| ENSG00000197724 | 1843.164305 | 674.1721258 | 1.451186346  | 7.20E-10 | 7.61E-09 | PHF2       |
| ENSG00000132361 | 817.7052506 | 1819.835885 | -1.154283506 | 7.41E-10 | 7.82E-09 | CLUH       |
| novel.316       | 321.1748538 | 70.88186989 | 2.180732838  | 7.43E-10 | 7.84E-09 | -          |
| ENSG00000270885 | 18.82593664 | 318.1408012 | -4.080067859 | 7.54E-10 | 7.95E-09 | RASL10B    |
| ENSG00000150048 | 151.1287413 | 0.356539013 | 8.611325072  | 7.56E-10 | 7.97E-09 | CLEC1A     |
| ENSG00000272674 | 70.55942538 | 1.467450118 | 5.612720474  | 7.58E-10 | 8.00E-09 | PCDHB16    |
| ENSG00000253837 | 8.194659761 | 97.9969777  | -3.57950637  | 7.60E-10 | 8.01E-09 | AC090197.1 |
| ENSG00000163171 | 680.3321142 | 2417.041322 | -1.828998684 | 7.72E-10 | 8.13E-09 | CDC42EP3   |
| novel.685       | 4.207416313 | 59.6109218  | -3.818400047 | 7.78E-10 | 8.19E-09 | -          |
| ENSG00000242861 | 137.3088992 | 23.32823412 | 2.557691211  | 7.79E-10 | 8.20E-09 | AL591895.1 |
| ENSG00000275024 | 71.74395669 | 0           | 8.498931628  | 7.80E-10 | 8.21E-09 | AC005383.1 |
| ENSG00000203797 | 82.11423159 | 3.169868797 | 4.680119299  | 7.89E-10 | 8.30E-09 | DDO        |
| ENSG00000154217 | 186.9647987 | 962.0181392 | -2.363297768 | 7.99E-10 | 8.41E-09 | PITPNC1    |
| ENSG00000231062 | 66.15300604 | 0           | 8.382117596  | 8.08E-10 | 8.50E-09 | AC103563.2 |
| ENSG00000198604 | 434.0944304 | 1078.211813 | -1.312630625 | 8.17E-10 | 8.59E-09 | BAZ1A      |
| ENSG00000286282 | 80.56597036 | 0           | 8.666372189  | 8.18E-10 | 8.59E-09 | AC021733.3 |
| ENSG00000224812 | 91.33335402 | 1.049547942 | 6.414492187  | 8.22E-10 | 8.63E-09 | TMEM72-AS1 |
| ENSG00000091513 | 80.99491854 | 0.387220594 | 7.71190714   | 8.25E-10 | 8.66E-09 | TF         |
| ENSG00000023608 | 126.9927447 | 506.1140349 | -1.99542103  | 8.30E-10 | 8.70E-09 | SNAPC1     |
| ENSG00000124571 | 471.5441526 | 1179.329205 | -1.322668152 | 8.30E-10 | 8.70E-09 | XPO5       |
| ENSG00000131899 | 233.6744721 | 926.8794028 | -1.987749579 | 8.48E-10 | 8.88E-09 | LLGL1      |
| ENSG00000101916 | 80.23557446 | 0           | 8.659497091  | 8.58E-10 | 8.99E-09 | TLR8       |
| ENSG00000226791 | 81.47540886 | 0           | 8.681627013  | 8.64E-10 | 9.04E-09 | LINC02611  |
| ENSG00000123131 | 808.6815677 | 2587.200965 | -1.677873583 | 8.65E-10 | 9.06E-09 | PRDX4      |
| ENSG00000103342 | 1397.94548  | 3541.644225 | -1.341214938 | 8.71E-10 | 9.11E-09 | GSPT1      |
| ENSG00000108639 | 1483.754839 | 522.8993407 | 1.504971271  | 8.99E-10 | 9.41E-09 | SYNGR2     |
| ENSG00000141542 | 873.4941672 | 215.3100607 | 2.021243269  | 9.01E-10 | 9.42E-09 | RAB40B     |
| ENSG00000092470 | 103.4895001 | 433.8601804 | -2.067547345 | 9.02E-10 | 9.43E-09 | WDR76      |
| ENSG00000055118 | 67.59359532 | 1.161661783 | 5.955164565  | 9.03E-10 | 9.43E-09 | KCNH2      |
| ENSG00000177426 | 359.2049154 | 1322.050261 | -1.87995278  | 9.25E-10 | 9.66E-09 | TGIF1      |
| ENSG00000179348 | 1264.063178 | 47.40318158 | 4.734149261  | 9.32E-10 | 9.73E-09 | GATA2      |
| ENSG00000014138 | 76.58237315 | 228.3869022 | -1.576969672 | 9.36E-10 | 9.76E-09 | POLA2      |
| ENSG00000005812 | 1301.554593 | 546.4398714 | 1.251921711  | 9.39E-10 | 9.79E-09 | FBXL3      |
| ENSG00000049192 | 27.9318027  | 307.5152369 | -3.460588594 | 9.46E-10 | 9.86E-09 | ADAMTS6    |
| ENSG00000162817 | 274.0318706 | 18.45967106 | 3.883818303  | 9.49E-10 | 9.89E-09 | C1orf115   |
| ENSG00000132170 | 56.12049044 | 251.0392896 | -2.162693113 | 9.53E-10 | 9.93E-09 | PPARG      |
| ENSG00000213740 | 65.42410588 | 296.3877047 | -2.181237696 | 9.57E-10 | 9.96E-09 | SERBP1P1   |
| ENSG00000171962 | 122.6173106 | 22.72380231 | 2.434572853  | 9.57E-10 | 9.96E-09 | DRC3       |
| ENSG00000129128 | 1598.960738 | 3427.351196 | -1.099925163 | 9.60E-10 | 9.99E-09 | SPCS3      |
| ENSG00000115138 | 79.04782419 | 4.881744087 | 3.99480714   | 9.80E-10 | 1.02E-08 | POMC       |

|                 |             |             |              |          |          |             |
|-----------------|-------------|-------------|--------------|----------|----------|-------------|
| ENSG00000140263 | 180.5094269 | 648.8757416 | -1.845291469 | 9.85E-10 | 1.02E-08 | SORD        |
| ENSG00000169994 | 49.73047839 | 0           | 7.969625972  | 9.97E-10 | 1.04E-08 | MYO7B       |
| ENSG00000236120 | 46.62804335 | 0           | 7.876857961  | 1.01E-09 | 1.05E-08 | AC110995.1  |
| novel.904       | 111.7837397 | 0           | 9.13844512   | 1.02E-09 | 1.06E-08 | -           |
| ENSG00000285967 | 452.3064622 | 140.9611384 | 1.682502427  | 1.02E-09 | 1.06E-08 | NIPBL-DT    |
| ENSG00000185905 | 61.02284333 | 0           | 8.264520469  | 1.02E-09 | 1.06E-08 | C16orf54    |
| ENSG00000250343 | 108.2576131 | 0.387220594 | 8.130677611  | 1.03E-09 | 1.07E-08 | STK32A-AS1  |
| ENSG00000244038 | 2412.893372 | 6778.320469 | -1.490168115 | 1.04E-09 | 1.08E-08 | DDOST       |
| ENSG00000130598 | 60.67666415 | 0           | 8.256351484  | 1.04E-09 | 1.08E-08 | TNNI2       |
| ENSG00000204856 | 200.1164032 | 570.4766075 | -1.51116783  | 1.05E-09 | 1.08E-08 | FAM216A     |
| ENSG00000157399 | 361.1305002 | 89.9991164  | 2.004634641  | 1.06E-09 | 1.10E-08 | ARSE        |
| ENSG00000173641 | 8.576083648 | 209.1816862 | -4.612767875 | 1.07E-09 | 1.10E-08 | HSPB7       |
| ENSG00000122126 | 447.8406788 | 1072.760732 | -1.260497017 | 1.07E-09 | 1.11E-08 | OCRL        |
| ENSG00000261236 | 518.3092713 | 1729.535899 | -1.738672122 | 1.08E-09 | 1.12E-08 | BOP1        |
| ENSG00000139116 | 755.3134919 | 127.5560461 | 2.565550402  | 1.09E-09 | 1.13E-08 | KIF21A      |
| ENSG00000115053 | 6372.65889  | 16361.65188 | -1.360375472 | 1.09E-09 | 1.13E-08 | NCL         |
| ENSG00000065371 | 50.49841203 | 0           | 7.991416397  | 1.09E-09 | 1.13E-08 | ROPN1       |
| ENSG00000134516 | 728.5098425 | 105.1301981 | 2.794288319  | 1.10E-09 | 1.14E-08 | DOCK2       |
| ENSG00000099250 | 945.7834261 | 4902.271875 | -2.373934776 | 1.11E-09 | 1.14E-08 | NRP1        |
| ENSG00000161643 | 58.49775844 | 2.079026788 | 4.776587196  | 1.12E-09 | 1.15E-08 | SIGLEC16    |
| ENSG00000163273 | 59.82598934 | 0           | 8.235904219  | 1.13E-09 | 1.16E-08 | NPPC        |
| ENSG00000137857 | 260.1273088 | 17.04040308 | 3.935441684  | 1.14E-09 | 1.17E-08 | DUOX1       |
| ENSG00000078098 | 70.9915216  | 1856.44982  | -4.709360438 | 1.14E-09 | 1.18E-08 | FAP         |
| ENSG00000087365 | 2983.735325 | 6608.528995 | -1.147174925 | 1.15E-09 | 1.18E-08 | SF3B2       |
| ENSG00000105173 | 76.28941703 | 338.4319193 | -2.14932038  | 1.15E-09 | 1.18E-08 | CCNE1       |
| ENSG00000250971 | 59.52655152 | 0           | 8.228656226  | 1.15E-09 | 1.19E-08 | AC110772.2  |
| ENSG00000078399 | 3.690241654 | 238.7334001 | -6.022618168 | 1.16E-09 | 1.20E-08 | HOXA9       |
| ENSG00000163239 | 119.8169353 | 1.426156051 | 6.385714219  | 1.20E-09 | 1.24E-08 | TDRD10      |
| ENSG00000236609 | 544.1119875 | 45.42082303 | 3.57791695   | 1.21E-09 | 1.24E-08 | ZNF853      |
| ENSG00000168303 | 324.0848666 | 817.8904622 | -1.335656987 | 1.21E-09 | 1.25E-08 | MPLKIP      |
| ENSG00000100216 | 558.5361192 | 1405.713565 | -1.331781352 | 1.21E-09 | 1.25E-08 | TOMM22      |
| ENSG00000278530 | 104.9882004 | 0           | 9.04818949   | 1.22E-09 | 1.25E-08 | CHMP1B2P    |
| ENSG00000002834 | 4339.093898 | 9940.139403 | -1.195902577 | 1.23E-09 | 1.26E-08 | LASP1       |
| ENSG00000151962 | 70.96509587 | 3.82158366  | 4.187086085  | 1.23E-09 | 1.27E-08 | RBM46       |
| ENSG00000170500 | 94.12587916 | 0           | 8.889946764  | 1.25E-09 | 1.28E-08 | LONRF2      |
| ENSG00000111667 | 1279.296694 | 2799.805503 | -1.130048105 | 1.25E-09 | 1.28E-08 | USP5        |
| ENSG00000131242 | 118.7636944 | 5.911222933 | 4.309461354  | 1.26E-09 | 1.29E-08 | RAB11FIP4   |
| ENSG00000198618 | 697.3173484 | 1580.454927 | -1.180405094 | 1.27E-09 | 1.30E-08 | PPIAP22     |
| novel.384       | 64.32049297 | 0           | 8.341601829  | 1.30E-09 | 1.33E-08 | -           |
| ENSG00000138095 | 1128.23438  | 2757.747987 | -1.289521048 | 1.31E-09 | 1.34E-08 | LRPPRC      |
| ENSG00000229950 | 50.37477082 | 0           | 7.988739116  | 1.31E-09 | 1.34E-08 | TFAP2A-AS1  |
| ENSG00000008838 | 887.1162717 | 1992.737346 | -1.16760697  | 1.31E-09 | 1.34E-08 | MED24       |
| ENSG00000275880 | 3.972128392 | 50.94439301 | -3.689198713 | 1.32E-09 | 1.35E-08 | AL139385.1  |
| ENSG00000006210 | 214.7424728 | 18.42282492 | 3.550920453  | 1.32E-09 | 1.35E-08 | CX3CL1      |
| ENSG00000103056 | 139.4754819 | 33.28282825 | 2.070866417  | 1.32E-09 | 1.35E-08 | SMPD3       |
| ENSG00000285051 | 50.24897797 | 2.191140629 | 4.539029044  | 1.32E-09 | 1.35E-08 | SLC7A14-AS1 |
| ENSG00000149100 | 1216.689945 | 2814.451296 | -1.209970066 | 1.33E-09 | 1.36E-08 | EIF3M       |
| ENSG00000118946 | 106.6564845 | 0.713078025 | 7.216516873  | 1.34E-09 | 1.36E-08 | PCDH17      |
| ENSG00000176209 | 741.8234415 | 258.8754895 | 1.518014543  | 1.36E-09 | 1.39E-08 | SMIM19      |
| ENSG00000010256 | 1968.296169 | 5012.017822 | -1.348383812 | 1.37E-09 | 1.39E-08 | UQCRC1      |
| ENSG00000164134 | 478.3688825 | 1422.957916 | -1.572992164 | 1.37E-09 | 1.40E-08 | NAA15       |

|                 |             |             |              |          |          |            |
|-----------------|-------------|-------------|--------------|----------|----------|------------|
| ENSG00000277476 | 141.9511481 | 21.09451516 | 2.756734379  | 1.37E-09 | 1.40E-08 | AC005332.5 |
| ENSG00000166839 | 474.9007672 | 115.1841574 | 2.045330354  | 1.38E-09 | 1.40E-08 | ANKDD1A    |
| ENSG00000134321 | 628.4573637 | 97.0371284  | 2.692891636  | 1.40E-09 | 1.42E-08 | RSAD2      |
| ENSG00000015171 | 3201.512329 | 1206.424291 | 1.40792033   | 1.41E-09 | 1.43E-08 | ZMYND11    |
| ENSG00000119888 | 75.91856433 | 2.486316478 | 4.923123568  | 1.41E-09 | 1.43E-08 | EPCAM      |
| ENSG00000136997 | 590.8977367 | 3319.523948 | -2.489798763 | 1.41E-09 | 1.43E-08 | MYC        |
| ENSG00000009780 | 321.1712351 | 104.3880267 | 1.621539299  | 1.41E-09 | 1.44E-08 | FAM76A     |
| ENSG00000135924 | 4295.576173 | 1322.610736 | 1.699718213  | 1.42E-09 | 1.44E-08 | DNAJB2     |
| ENSG00000167771 | 8.914669664 | 227.8268341 | -4.67980836  | 1.42E-09 | 1.44E-08 | RCOR2      |
| ENSG00000109790 | 1340.023276 | 2981.736833 | -1.153930842 | 1.42E-09 | 1.45E-08 | KLHL5      |
| ENSG00000127526 | 614.304561  | 1806.97018  | -1.556409059 | 1.43E-09 | 1.45E-08 | SLC35E1    |
| ENSG00000105552 | 451.6689651 | 1121.010939 | -1.311376726 | 1.43E-09 | 1.45E-08 | BCAT2      |
| ENSG00000100591 | 1088.837351 | 3066.959008 | -1.494144755 | 1.43E-09 | 1.45E-08 | AHSA1      |
| ENSG00000166971 | 820.282776  | 289.6543723 | 1.501114804  | 1.44E-09 | 1.46E-08 | AKTIP      |
| ENSG00000198931 | 955.7094848 | 2444.907723 | -1.355128097 | 1.46E-09 | 1.48E-08 | APRT       |
| ENSG00000073737 | 193.3017153 | 0.713078025 | 8.074524189  | 1.48E-09 | 1.50E-08 | DHRS9      |
| ENSG00000067369 | 520.3287498 | 1368.100066 | -1.394604868 | 1.50E-09 | 1.52E-08 | TP53BP1    |
| ENSG00000198300 | 81.3935375  | 5.574753017 | 3.846507697  | 1.51E-09 | 1.53E-08 | PEG3       |
| ENSG00000081665 | 513.8694307 | 211.0771246 | 1.283303047  | 1.51E-09 | 1.53E-08 | ZNF506     |
| ENSG00000061676 | 1785.408035 | 3901.963624 | -1.127966779 | 1.52E-09 | 1.54E-08 | NCKAP1     |
| ENSG00000143977 | 685.5988548 | 1534.546247 | -1.162416218 | 1.54E-09 | 1.55E-08 | SNRPG      |
| ENSG00000144445 | 508.0803747 | 201.5816795 | 1.333999716  | 1.55E-09 | 1.57E-08 | KANSL1L    |
| novel.92        | 0           | 79.99650289 | -8.901820797 | 1.56E-09 | 1.58E-08 | -          |
| ENSG00000120885 | 20237.69635 | 893.2776255 | 4.501605815  | 1.57E-09 | 1.58E-08 | CLU        |
| ENSG00000265107 | 76.15456391 | 0.356539013 | 7.622572045  | 1.57E-09 | 1.59E-08 | GJA5       |
| ENSG00000141543 | 986.1076219 | 2355.106964 | -1.256122001 | 1.58E-09 | 1.59E-08 | EIF4A3     |
| ENSG00000143569 | 1814.54074  | 3936.727388 | -1.117320916 | 1.58E-09 | 1.59E-08 | UBAP2L     |
| ENSG00000187595 | 106.7569192 | 0.387220594 | 8.110625173  | 1.59E-09 | 1.60E-08 | ZNF385C    |
| ENSG00000153291 | 551.5046516 | 104.1021319 | 2.406721999  | 1.60E-09 | 1.61E-08 | SLC25A27   |
| ENSG00000168374 | 2262.19309  | 8224.133495 | -1.862184437 | 1.60E-09 | 1.61E-08 | ARF4       |
| ENSG00000086205 | 126.3478679 | 0           | 9.314814072  | 1.60E-09 | 1.61E-08 | FOLH1      |
| ENSG00000131477 | 274.3193118 | 13.43256301 | 4.355315458  | 1.65E-09 | 1.66E-08 | RAMP2      |
| ENSG00000174080 | 2140.239411 | 765.7137507 | 1.483242768  | 1.65E-09 | 1.66E-08 | CTSF       |
| ENSG00000020256 | 201.8481963 | 519.1772506 | -1.36292387  | 1.65E-09 | 1.66E-08 | ZFP64      |
| ENSG00000105063 | 1126.311719 | 2770.259328 | -1.298322141 | 1.66E-09 | 1.67E-08 | PPP6R1     |
| ENSG00000169507 | 87.16655301 | 0.356539013 | 7.818145708  | 1.67E-09 | 1.68E-08 | SLC38A11   |
| ENSG00000198435 | 127.1991271 | 11.87422403 | 3.422669077  | 1.67E-09 | 1.68E-08 | NRARP      |
| ENSG00000123395 | 303.3145564 | 762.652669  | -1.33062411  | 1.70E-09 | 1.71E-08 | ATG101     |
| ENSG00000156966 | 147.9117409 | 5.654901006 | 4.734551606  | 1.71E-09 | 1.72E-08 | B3GNT7     |
| ENSG00000287419 | 91.54278568 | 0           | 8.850582113  | 1.72E-09 | 1.73E-08 | AL121929.3 |
| ENSG00000144711 | 2230.809999 | 624.9061823 | 1.836031162  | 1.72E-09 | 1.73E-08 | IQSEC1     |
| novel.20        | 68.56930752 | 2.954969332 | 4.561759519  | 1.73E-09 | 1.73E-08 | -          |
| ENSG00000173198 | 94.88905476 | 0.387220594 | 7.939710663  | 1.73E-09 | 1.74E-08 | CYSLTR1    |
| ENSG00000171502 | 429.4751626 | 57.12442974 | 2.91358111   | 1.75E-09 | 1.75E-08 | COL24A1    |
| ENSG00000287778 | 44.39397675 | 0           | 7.806361934  | 1.77E-09 | 1.77E-08 | AC006230.1 |
| ENSG00000277147 | 172.6884832 | 46.44169718 | 1.892484054  | 1.77E-09 | 1.78E-08 | LINC00869  |
| ENSG00000166925 | 5735.481027 | 2034.458306 | 1.495387035  | 1.77E-09 | 1.78E-08 | TSC22D4    |
| ENSG00000103353 | 896.155579  | 2490.840894 | -1.47488188  | 1.78E-09 | 1.78E-08 | UBFD1      |
| ENSG00000179639 | 53.33658269 | 0           | 8.070268929  | 1.79E-09 | 1.79E-08 | FCER1A     |
| ENSG00000166275 | 593.4044411 | 198.3351775 | 1.580354729  | 1.80E-09 | 1.80E-08 | BORCS7     |
| ENSG00000110713 | 1047.47619  | 2174.357321 | -1.053740541 | 1.80E-09 | 1.80E-08 | NUP98      |

|                 |             |             |              |          |          |            |
|-----------------|-------------|-------------|--------------|----------|----------|------------|
| ENSG00000090539 | 182.1661278 | 9.915740207 | 4.193748102  | 1.80E-09 | 1.80E-08 | CHRD       |
| ENSG00000107159 | 3.590704505 | 319.2596244 | -6.469564154 | 1.81E-09 | 1.81E-08 | CA9        |
| ENSG00000167085 | 868.5461796 | 2269.234625 | -1.385694829 | 1.81E-09 | 1.81E-08 | PHB        |
| ENSG00000172331 | 920.2027257 | 321.3687155 | 1.516911267  | 1.81E-09 | 1.81E-08 | BPGM       |
| ENSG00000239911 | 59.18399075 | 0           | 8.220410166  | 1.83E-09 | 1.83E-08 | PRKAG2-AS1 |
| ENSG00000139832 | 972.592389  | 226.4931552 | 2.103648647  | 1.87E-09 | 1.86E-08 | RAB20      |
| ENSG00000116337 | 560.7037418 | 2280.776482 | -2.024156947 | 1.87E-09 | 1.87E-08 | AMPD2      |
| ENSG00000244462 | 863.2777039 | 1822.726464 | -1.07823363  | 1.89E-09 | 1.88E-08 | RBM12      |
| ENSG00000177694 | 330.2783117 | 57.65513491 | 2.51394789   | 1.89E-09 | 1.88E-08 | NAALADL2   |
| ENSG00000128564 | 1.789675198 | 58.40180139 | -5.012065411 | 1.93E-09 | 1.92E-08 | VGF        |
| ENSG00000134532 | 333.8061074 | 39.07936881 | 3.098172669  | 1.94E-09 | 1.93E-08 | SOX5       |
| ENSG00000266028 | 3205.130259 | 1211.901255 | 1.403226424  | 1.94E-09 | 1.93E-08 | SRGAP2     |
| ENSG00000118518 | 1491.976184 | 662.0297302 | 1.172510805  | 1.96E-09 | 1.95E-08 | RNF146     |
| ENSG00000253988 | 47.63216256 | 0           | 7.9080497    | 1.96E-09 | 1.95E-08 | AC079015.1 |
| ENSG00000053524 | 27.98606596 | 153.0024649 | -2.453482611 | 1.98E-09 | 1.97E-08 | MCF2L2     |
| ENSG00000006453 | 47.33795279 | 258.488958  | -2.45039979  | 1.99E-09 | 1.98E-08 | BAIAP2L1   |
| ENSG00000120162 | 191.5766597 | 8.437549209 | 4.513419377  | 2.00E-09 | 1.98E-08 | MOB3B      |
| ENSG00000138696 | 374.3322357 | 32.33046213 | 3.527498485  | 2.00E-09 | 1.99E-08 | BMPR1B     |
| ENSG00000272143 | 168.7205864 | 34.85550414 | 2.272013514  | 2.01E-09 | 2.00E-08 | FGF14-AS2  |
| ENSG00000004897 | 1030.668833 | 2110.928656 | -1.034311562 | 2.06E-09 | 2.04E-08 | CDC27      |
| ENSG00000139626 | 85.42354755 | 0.672939833 | 6.905686176  | 2.06E-09 | 2.04E-08 | ITGB7      |
| ENSG00000137441 | 903.6763244 | 0           | 12.15335141  | 2.08E-09 | 2.06E-08 | FGFBP2     |
| ENSG00000175879 | 3.083559037 | 168.5821775 | -5.782263584 | 2.08E-09 | 2.06E-08 | HOXD8      |
| ENSG00000183527 | 236.5140821 | 886.0644973 | -1.90570464  | 2.10E-09 | 2.07E-08 | PSMG1      |
| ENSG00000151320 | 150.8387788 | 13.01478923 | 3.526659771  | 2.13E-09 | 2.11E-08 | AKAP6      |
| ENSG00000121577 | 79.0376528  | 5.573468747 | 3.85121634   | 2.13E-09 | 2.11E-08 | POPDC2     |
| ENSG00000070808 | 110.5432931 | 5.258223802 | 4.422133212  | 2.13E-09 | 2.11E-08 | CAMK2A     |
| ENSG00000158079 | 1411.880423 | 353.3613766 | 1.998602981  | 2.13E-09 | 2.11E-08 | PTPDC1     |
| ENSG00000196268 | 388.10833   | 85.50968281 | 2.181076285  | 2.15E-09 | 2.12E-08 | ZNF493     |
| ENSG00000116883 | 51.80712619 | 306.4163169 | -2.563539149 | 2.16E-09 | 2.14E-08 | AL591845.1 |
| ENSG00000178971 | 608.2948777 | 216.4355655 | 1.49128477   | 2.16E-09 | 2.14E-08 | CTC1       |
| ENSG00000006071 | 69.48477332 | 0           | 8.451910342  | 2.17E-09 | 2.15E-08 | ABCC8      |
| ENSG00000111786 | 1062.270775 | 2869.176733 | -1.433477046 | 2.20E-09 | 2.17E-08 | SRSF9      |
| ENSG00000170871 | 1619.793206 | 654.8428051 | 1.306681138  | 2.20E-09 | 2.17E-08 | KIAA0232   |
| ENSG00000105364 | 418.9795489 | 988.058287  | -1.237924683 | 2.23E-09 | 2.20E-08 | MRPL4      |
| ENSG00000117139 | 482.2551496 | 2215.488603 | -2.19971903  | 2.25E-09 | 2.21E-08 | KDM5B      |
| ENSG00000198844 | 84.11422048 | 0.387220594 | 7.765769753  | 2.26E-09 | 2.22E-08 | ARHGEF15   |
| ENSG00000176049 | 797.325129  | 19.16342087 | 5.372264959  | 2.27E-09 | 2.24E-08 | JAKMIP2    |
| ENSG00000131042 | 55.62824622 | 0           | 8.131214265  | 2.29E-09 | 2.26E-08 | LILRB2     |
| ENSG00000196227 | 442.0358235 | 163.0029294 | 1.438254918  | 2.30E-09 | 2.26E-08 | FAM217B    |
| ENSG00000115363 | 178.3072992 | 855.4242282 | -2.262315133 | 2.30E-09 | 2.26E-08 | EVA1A      |
| ENSG00000002587 | 84.76016601 | 0.336469917 | 7.777752819  | 2.31E-09 | 2.27E-08 | HS3ST1     |
| ENSG00000233117 | 15.15714956 | 115.235854  | -2.928795267 | 2.31E-09 | 2.27E-08 | LINC00702  |
| ENSG00000237797 | 49.66034498 | 0           | 7.96720671   | 2.32E-09 | 2.28E-08 | MACORIS    |
| ENSG00000136237 | 1072.325234 | 30.39367001 | 5.14491402   | 2.33E-09 | 2.29E-08 | RAPGEF5    |
| ENSG00000012779 | 90.22019415 | 0           | 8.828787012  | 2.34E-09 | 2.30E-08 | ALOX5      |
| ENSG00000066923 | 224.9434495 | 43.88083651 | 2.361247354  | 2.34E-09 | 2.30E-08 | STAG3      |
| ENSG00000134323 | 58.35853146 | 0           | 8.200063741  | 2.35E-09 | 2.31E-08 | MYCN       |
| ENSG00000123416 | 4460.924113 | 15617.75642 | -1.807796964 | 2.37E-09 | 2.32E-08 | TUBA1B     |
| ENSG00000174837 | 62.0029294  | 0           | 8.287801289  | 2.37E-09 | 2.32E-08 | ADGRE1     |
| ENSG00000075240 | 789.026027  | 258.9879413 | 1.60626398   | 2.37E-09 | 2.33E-08 | GRAMD4     |

|                 |             |             |              |          |          |            |
|-----------------|-------------|-------------|--------------|----------|----------|------------|
| ENSG00000160208 | 513.4866816 | 1189.125396 | -1.211783863 | 2.38E-09 | 2.33E-08 | RRP1B      |
| ENSG00000173947 | 83.31645618 | 0.743759607 | 6.853282482  | 2.38E-09 | 2.33E-08 | PIFO       |
| ENSG00000254087 | 968.9117741 | 125.3034954 | 2.952726246  | 2.40E-09 | 2.35E-08 | LYN        |
| ENSG00000102349 | 144.3087137 | 8.602982267 | 4.048804371  | 2.42E-09 | 2.37E-08 | KLF8       |
| ENSG00000182934 | 2059.527433 | 4308.109591 | -1.064763084 | 2.43E-09 | 2.38E-08 | SRPRA      |
| ENSG00000176115 | 57.37264787 | 0           | 8.176199972  | 2.45E-09 | 2.39E-08 | AQP7P4     |
| ENSG00000116017 | 170.65822   | 1023.18886  | -2.583986006 | 2.46E-09 | 2.41E-08 | ARID3A     |
| ENSG00000085733 | 4109.295324 | 8436.225536 | -1.037673495 | 2.49E-09 | 2.43E-08 | CTTN       |
| ENSG00000168952 | 98.23283285 | 14.11624373 | 2.789098666  | 2.49E-09 | 2.43E-08 | STXBP6     |
| ENSG00000161179 | 144.6924589 | 636.6565158 | -2.138238776 | 2.50E-09 | 2.44E-08 | YDJC       |
| ENSG00000165121 | 100.2436498 | 18.27301303 | 2.455191329  | 2.51E-09 | 2.45E-08 | AL353743.1 |
| ENSG00000182957 | 2427.155988 | 242.51768   | 3.323877006  | 2.51E-09 | 2.45E-08 | SPATA13    |
| ENSG00000101266 | 1315.917979 | 3199.725751 | -1.281799365 | 2.52E-09 | 2.46E-08 | CSNK2A1    |
| ENSG00000135372 | 614.7052172 | 1523.048386 | -1.309250756 | 2.53E-09 | 2.47E-08 | NAT10      |
| ENSG00000118473 | 57.92563635 | 750.3205077 | -3.696086812 | 2.54E-09 | 2.47E-08 | SGIP1      |
| ENSG00000177853 | 1246.082116 | 337.6326568 | 1.884191015  | 2.56E-09 | 2.50E-08 | ZNF518A    |
| ENSG00000089335 | 972.7493653 | 346.4727094 | 1.488655256  | 2.58E-09 | 2.51E-08 | ZNF302     |
| ENSG00000146425 | 704.7676362 | 1943.119555 | -1.463144651 | 2.58E-09 | 2.51E-08 | DYNLT1     |
| ENSG00000099260 | 169.2453383 | 6.421169854 | 4.717372396  | 2.62E-09 | 2.55E-08 | PALMD      |
| ENSG00000283632 | 113.6628082 | 5.983198582 | 4.236490639  | 2.62E-09 | 2.55E-08 | EXOC3L2    |
| ENSG00000255240 | 51.54189289 | 0           | 8.02083906   | 2.63E-09 | 2.55E-08 | AP001636.3 |
| ENSG00000141076 | 129.0782393 | 420.1669288 | -1.703374139 | 2.63E-09 | 2.56E-08 | UTP4       |
| ENSG00000135842 | 1981.997277 | 416.3489627 | 2.251605438  | 2.66E-09 | 2.58E-08 | FAM129A    |
| ENSG00000180769 | 229.6459292 | 49.69081488 | 2.204814131  | 2.70E-09 | 2.62E-08 | WDFY3-AS2  |
| ENSG00000101445 | 109.8325132 | 0.336469917 | 8.150765836  | 2.71E-09 | 2.63E-08 | PPP1R16B   |
| ENSG00000107581 | 3946.282435 | 7812.208964 | -0.985215087 | 2.72E-09 | 2.64E-08 | EIF3A      |
| ENSG00000149575 | 159.5422486 | 1.069617038 | 7.213333713  | 2.72E-09 | 2.64E-08 | SCN2B      |
| ENSG00000165685 | 120.6594323 | 5.127325134 | 4.528124865  | 2.73E-09 | 2.65E-08 | TMEM52B    |
| ENSG00000227619 | 0.293240848 | 70.92414425 | -7.765862269 | 2.74E-09 | 2.65E-08 | AL391056.1 |
| ENSG00000198056 | 42.18408547 | 153.6229374 | -1.865215476 | 2.74E-09 | 2.65E-08 | PRIM1      |
| ENSG00000267127 | 52.39464807 | 2.51699806  | 4.382218509  | 2.74E-09 | 2.66E-08 | AC090360.1 |
| ENSG00000171914 | 1042.097467 | 124.0727774 | 3.068715097  | 2.76E-09 | 2.67E-08 | TLN2       |
| ENSG00000183454 | 49.26191165 | 0           | 7.956835549  | 2.76E-09 | 2.67E-08 | GRIN2A     |
| ENSG00000113263 | 51.55958652 | 0           | 8.021316002  | 2.78E-09 | 2.69E-08 | ITK        |
| ENSG00000159164 | 190.0486428 | 790.8844888 | -2.057173    | 2.79E-09 | 2.70E-08 | SV2A       |
| ENSG00000132622 | 146.1496304 | 6.389332397 | 4.509632949  | 2.81E-09 | 2.72E-08 | HSPA12B    |
| ENSG00000184408 | 0           | 57.83506762 | -8.433542517 | 2.81E-09 | 2.72E-08 | KCND2      |
| ENSG00000285976 | 38.45476689 | 175.9541721 | -2.194809747 | 2.82E-09 | 2.73E-08 | AL135905.2 |
| ENSG00000121933 | 108.0693944 | 0.387220594 | 8.12823837   | 2.87E-09 | 2.78E-08 | TMIGD3     |
| ENSG00000099814 | 543.3307761 | 1731.939794 | -1.672249647 | 2.90E-09 | 2.80E-08 | CEP170B    |
| ENSG00000107566 | 804.1180588 | 1925.828634 | -1.260173273 | 2.91E-09 | 2.81E-08 | ERLIN1     |
| ENSG00000187068 | 234.8590038 | 21.26007661 | 3.457363796  | 2.94E-09 | 2.84E-08 | C3orf70    |
| ENSG00000126457 | 1698.328683 | 4434.746289 | -1.38466247  | 2.98E-09 | 2.88E-08 | PRMT1      |
| ENSG00000122223 | 64.57608057 | 0           | 8.346173743  | 2.99E-09 | 2.88E-08 | CD244      |
| ENSG00000265354 | 649.5453174 | 1703.761718 | -1.391436552 | 3.04E-09 | 2.93E-08 | TIMM23     |
| ENSG00000177181 | 46.27588066 | 0           | 7.865374589  | 3.07E-09 | 2.96E-08 | RIMKLA     |
| ENSG00000150787 | 263.4027168 | 748.83515   | -1.507856881 | 3.09E-09 | 2.97E-08 | PTS        |
| ENSG00000167614 | 72.37850432 | 0.336469917 | 7.549835204  | 3.10E-09 | 2.98E-08 | TTYH1      |
| ENSG00000182263 | 885.2370106 | 96.44788539 | 3.197382093  | 3.11E-09 | 2.99E-08 | FIGN       |
| novel.928       | 102.8907228 | 0           | 9.018441688  | 3.13E-09 | 3.01E-08 | -          |
| novel.112       | 73.27743104 | 0           | 8.529615282  | 3.14E-09 | 3.02E-08 | -          |

|                 |             |             |              |          |          |            |
|-----------------|-------------|-------------|--------------|----------|----------|------------|
| ENSG00000100842 | 2016.6296   | 498.4436755 | 2.016940374  | 3.20E-09 | 3.07E-08 | EFS        |
| ENSG00000078967 | 358.1944295 | 122.4616331 | 1.54725349   | 3.23E-09 | 3.10E-08 | UBE2D4     |
| ENSG00000176177 | 56.13567642 | 0           | 8.144115778  | 3.24E-09 | 3.11E-08 | ENTHD1     |
| ENSG00000146701 | 1471.545468 | 3790.181172 | -1.365002899 | 3.25E-09 | 3.12E-08 | MDH2       |
| ENSG00000134779 | 1054.455519 | 2332.454633 | -1.145218159 | 3.26E-09 | 3.13E-08 | TPGS2      |
| ENSG00000104413 | 117.0877029 | 1.161661783 | 6.730468737  | 3.28E-09 | 3.15E-08 | ESRP1      |
| ENSG00000125388 | 359.5918965 | 125.2888674 | 1.521935145  | 3.29E-09 | 3.16E-08 | GRK4       |
| ENSG00000167625 | 165.9106368 | 510.041123  | -1.619707059 | 3.37E-09 | 3.24E-08 | ZNF526     |
| ENSG00000100450 | 85.60001273 | 0           | 8.752938344  | 3.38E-09 | 3.24E-08 | GZMH       |
| ENSG00000159788 | 1068.993137 | 420.4595705 | 1.346675033  | 3.38E-09 | 3.24E-08 | RGS12      |
| ENSG00000256667 | 147.0345969 | 27.28084484 | 2.4306533    | 3.40E-09 | 3.25E-08 | KLRA1P     |
| ENSG00000157103 | 2442.755801 | 0           | 13.58795988  | 3.48E-09 | 3.34E-08 | SLC6A1     |
| ENSG00000165105 | 96.7172812  | 1.080229524 | 6.488381106  | 3.52E-09 | 3.37E-08 | RASEF      |
| ENSG00000205593 | 468.3697485 | 93.57511901 | 2.323534637  | 3.53E-09 | 3.37E-08 | DENND6B    |
| ENSG00000060709 | 80.56323399 | 0           | 8.66545646   | 3.54E-09 | 3.38E-08 | RIMBP2     |
| ENSG00000143546 | 50.10130362 | 0           | 7.98123964   | 3.63E-09 | 3.47E-08 | S100A8     |
| ENSG00000103202 | 949.1261227 | 4009.394532 | -2.078753923 | 3.63E-09 | 3.47E-08 | NME4       |
| ENSG00000171604 | 2308.257555 | 1024.568143 | 1.171834289  | 3.64E-09 | 3.47E-08 | CXXC5      |
| ENSG00000158470 | 720.9362572 | 1527.153702 | -1.083022664 | 3.64E-09 | 3.48E-08 | B4GALT5    |
| ENSG00000186188 | 48.34060489 | 0           | 7.929619432  | 3.70E-09 | 3.53E-08 | FFAR4      |
| ENSG00000160191 | 945.0794796 | 34.72717401 | 4.762246409  | 3.71E-09 | 3.54E-08 | PDE9A      |
| ENSG00000229417 | 70.37639161 | 0.774441189 | 6.604932778  | 3.73E-09 | 3.55E-08 | NPM1P25    |
| ENSG00000072071 | 463.6152949 | 101.5553514 | 2.193230551  | 3.76E-09 | 3.59E-08 | ADGRL1     |
| ENSG00000164161 | 42.21940145 | 1837.954087 | -5.444272731 | 3.77E-09 | 3.59E-08 | HHIP       |
| novel.343       | 53.73115632 | 0           | 8.081998055  | 3.82E-09 | 3.64E-08 | -          |
| ENSG00000171357 | 119.5342501 | 21.2563522  | 2.49320997   | 3.85E-09 | 3.66E-08 | LURAP1     |
| ENSG00000286156 | 210.3537197 | 72.81463363 | 1.530342105  | 3.90E-09 | 3.71E-08 | AC026273.1 |
| ENSG00000103942 | 223.4036628 | 39.71332632 | 2.495976343  | 3.91E-09 | 3.73E-08 | HOMER2     |
| ENSG00000277734 | 351.191791  | 6.705604823 | 5.722313586  | 3.93E-09 | 3.74E-08 | TRAC       |
| ENSG00000115648 | 84.54370995 | 2379.148809 | -4.815066158 | 3.95E-09 | 3.75E-08 | MLPH       |
| ENSG00000064201 | 88.67616424 | 7.693789602 | 3.539545497  | 3.98E-09 | 3.78E-08 | TSPAN32    |
| ENSG00000135930 | 820.519701  | 1828.467704 | -1.156135645 | 4.00E-09 | 3.80E-08 | EIF4E2     |
| ENSG00000197451 | 1941.424587 | 5379.282594 | -1.470349636 | 4.04E-09 | 3.84E-08 | HNRNPAB    |
| ENSG00000100804 | 1453.357084 | 3901.156478 | -1.424604139 | 4.05E-09 | 3.84E-08 | PSMB5      |
| ENSG00000143839 | 0           | 99.12617255 | -9.2132319   | 4.06E-09 | 3.86E-08 | REN        |
| ENSG00000119711 | 881.9188427 | 311.8546143 | 1.500136548  | 4.10E-09 | 3.89E-08 | ALDH6A1    |
| ENSG00000115514 | 263.37743   | 809.1285151 | -1.619800735 | 4.14E-09 | 3.93E-08 | TXNDC9     |
| ENSG00000250634 | 0.293240848 | 59.51181341 | -7.51381603  | 4.14E-09 | 3.93E-08 | LINC01182  |
| ENSG00000135441 | 511.239865  | 135.8161031 | 1.912210297  | 4.16E-09 | 3.94E-08 | BLOC1S1    |
| ENSG00000142408 | 11.51984623 | 455.7838649 | -5.306141049 | 4.16E-09 | 3.94E-08 | CACNG8     |
| ENSG00000163539 | 2176.600142 | 728.6137045 | 1.578703381  | 4.17E-09 | 3.95E-08 | CLASP2     |
| ENSG00000147168 | 79.75998402 | 0           | 8.650959904  | 4.18E-09 | 3.96E-08 | IL2RG      |
| ENSG00000092096 | 3918.672391 | 880.7320299 | 2.153905254  | 4.32E-09 | 4.09E-08 | SLC22A17   |
| ENSG00000100219 | 763.5708442 | 2309.607371 | -1.597019944 | 4.34E-09 | 4.11E-08 | XBP1       |
| ENSG00000183751 | 534.7281368 | 1407.634701 | -1.39666325  | 4.34E-09 | 4.11E-08 | TBL3       |
| ENSG00000211584 | 658.8441317 | 239.2396913 | 1.461314274  | 4.37E-09 | 4.13E-08 | SLC48A1    |
| ENSG00000259038 | 65.204119   | 0           | 8.36114845   | 4.40E-09 | 4.16E-08 | AL121820.2 |
| ENSG00000157540 | 1497.459177 | 698.1906375 | 1.100646695  | 4.40E-09 | 4.16E-08 | DYRK1A     |
| ENSG00000280255 | 62.65940231 | 0           | 8.303429165  | 4.40E-09 | 4.16E-08 | AC004947.2 |
| ENSG00000132341 | 2805.310936 | 9311.897268 | -1.730961859 | 4.48E-09 | 4.23E-08 | RAN        |
| ENSG00000172927 | 9.476007113 | 125.6141641 | -3.73148343  | 4.48E-09 | 4.23E-08 | MYEOV      |

|                 |             |             |              |          |          |            |
|-----------------|-------------|-------------|--------------|----------|----------|------------|
| ENSG00000198515 | 67.0363039  | 1.00940975  | 5.977483194  | 4.52E-09 | 4.26E-08 | CNGA1      |
| ENSG00000117834 | 101.3501417 | 3.12857473  | 4.994784125  | 4.57E-09 | 4.31E-08 | SLC5A9     |
| ENSG00000080166 | 46.30471493 | 0           | 7.866865968  | 4.60E-09 | 4.34E-08 | DCT        |
| novel.113       | 78.42950308 | 0.336469917 | 7.66579174   | 4.63E-09 | 4.36E-08 | -          |
| ENSG00000197937 | 774.7220369 | 148.3068181 | 2.385265026  | 4.67E-09 | 4.40E-08 | ZNF347     |
| ENSG00000012124 | 502.0905743 | 47.73986143 | 3.398579759  | 4.68E-09 | 4.41E-08 | CD22       |
| ENSG00000146223 | 1822.32407  | 4012.48916  | -1.138814152 | 4.71E-09 | 4.43E-08 | RPL7L1     |
| ENSG00000134375 | 617.1236704 | 1657.993474 | -1.426015652 | 4.72E-09 | 4.44E-08 | TIMM17A    |
| novel.311       | 73.79169895 | 0.713078025 | 6.684825978  | 4.74E-09 | 4.46E-08 | -          |
| ENSG00000064547 | 239.0721182 | 53.57820963 | 2.159941986  | 4.82E-09 | 4.53E-08 | LPAR2      |
| ENSG00000108592 | 694.2934232 | 1734.587019 | -1.321162177 | 4.82E-09 | 4.53E-08 | FTSJ3      |
| ENSG00000184867 | 750.4569215 | 2039.43554  | -1.442479644 | 4.86E-09 | 4.57E-08 | ARMCX2     |
| ENSG00000253320 | 151.0440782 | 32.16618495 | 2.225183483  | 4.88E-09 | 4.58E-08 | AZIN1-AS1  |
| ENSG00000163811 | 420.7818753 | 1149.786927 | -1.450307001 | 4.95E-09 | 4.65E-08 | WDR43      |
| ENSG00000219626 | 261.2413347 | 57.25820092 | 2.187806549  | 4.97E-09 | 4.67E-08 | FAM228B    |
| ENSG00000103326 | 627.9042194 | 1632.264427 | -1.378030277 | 5.00E-09 | 4.69E-08 | CAPN15     |
| ENSG00000248187 | 0.308355904 | 56.58868153 | -7.441159532 | 5.01E-09 | 4.69E-08 | AC078850.1 |
| ENSG00000213512 | 77.37535193 | 0           | 8.607935627  | 5.04E-09 | 4.72E-08 | GBP7       |
| ENSG00000121579 | 1178.166468 | 2689.159483 | -1.190730102 | 5.05E-09 | 4.74E-08 | NAA50      |
| ENSG00000261701 | 88.82721605 | 1.029478846 | 6.383008882  | 5.06E-09 | 4.74E-08 | HPR        |
| ENSG00000111728 | 160.7211531 | 2.792104814 | 5.829159029  | 5.09E-09 | 4.77E-08 | ST8SIA1    |
| ENSG00000186340 | 1416.638488 | 3471.878489 | -1.293161219 | 5.10E-09 | 4.77E-08 | THBS2      |
| ENSG00000058335 | 177.2351853 | 6.389204003 | 4.8141109    | 5.14E-09 | 4.81E-08 | RASGRF1    |
| novel.313       | 62.46042711 | 0           | 8.298111161  | 5.15E-09 | 4.82E-08 | -          |
| ENSG00000104341 | 683.2042325 | 2761.585368 | -2.015256776 | 5.26E-09 | 4.92E-08 | LAPTM4B    |
| ENSG00000160223 | 67.06646239 | 1.803920035 | 5.221378004  | 5.29E-09 | 4.94E-08 | ICOSLG     |
| ENSG00000197566 | 207.2245307 | 62.52112944 | 1.729452167  | 5.30E-09 | 4.96E-08 | ZNF624     |
| ENSG00000271971 | 69.6627925  | 11.44455349 | 2.603061289  | 5.38E-09 | 5.03E-08 | AC120053.1 |
| ENSG00000125457 | 442.0312641 | 103.5889401 | 2.091884422  | 5.40E-09 | 5.05E-08 | MIF4GD     |
| ENSG00000189343 | 594.0346851 | 2045.012417 | -1.783623245 | 5.43E-09 | 5.07E-08 | RPS2P46    |
| ENSG00000128739 | 227.8582631 | 71.35065113 | 1.674820974  | 5.45E-09 | 5.09E-08 | SNRPN      |
| ENSG00000230109 | 40.34397924 | 0           | 7.667783812  | 5.46E-09 | 5.09E-08 | LINC02643  |
| ENSG00000136856 | 643.663863  | 211.4661434 | 1.60674138   | 5.53E-09 | 5.16E-08 | SLC2A8     |
| ENSG00000150627 | 172.5068612 | 21.55139965 | 3.007024417  | 5.55E-09 | 5.18E-08 | WDR17      |
| ENSG00000239305 | 1102.649462 | 361.0560309 | 1.610229408  | 5.56E-09 | 5.19E-08 | RNF103     |
| ENSG00000127249 | 79.6528975  | 1.426156051 | 5.796296097  | 5.57E-09 | 5.19E-08 | ATP13A4    |
| ENSG00000156265 | 160.8920217 | 39.81868049 | 2.011102074  | 5.57E-09 | 5.19E-08 | MAP3K7CL   |
| ENSG00000151135 | 914.2053763 | 2537.214118 | -1.472703152 | 5.58E-09 | 5.20E-08 | TMEM263    |
| ENSG00000273373 | 183.6235721 | 48.69188922 | 1.914313026  | 5.63E-09 | 5.24E-08 | AL355488.1 |
| ENSG00000066382 | 42.87017559 | 0           | 7.755202918  | 5.66E-09 | 5.27E-08 | MPPED2     |
| ENSG00000121957 | 218.4686159 | 556.1070765 | -1.348020855 | 5.70E-09 | 5.30E-08 | GPSM2      |
| ENSG00000213281 | 777.9667716 | 1907.28968  | -1.293912164 | 5.78E-09 | 5.38E-08 | NRAS       |
| ENSG00000165194 | 117.4990002 | 2.537067156 | 5.539671329  | 5.80E-09 | 5.39E-08 | PCDH19     |
| ENSG00000109762 | 235.4527932 | 670.309984  | -1.509993688 | 5.81E-09 | 5.39E-08 | SNX25      |
| ENSG00000133706 | 1484.013961 | 3335.741299 | -1.168494127 | 5.84E-09 | 5.42E-08 | LARS       |
| ENSG00000188985 | 36.65624488 | 229.3605873 | -2.646547868 | 5.85E-09 | 5.43E-08 | DHFRP1     |
| ENSG00000001561 | 496.1770527 | 26.295357   | 4.232387135  | 5.86E-09 | 5.43E-08 | ENPP4      |
| ENSG00000135446 | 700.9698652 | 1807.173992 | -1.366484722 | 5.86E-09 | 5.44E-08 | CDK4       |
| ENSG00000100320 | 116.772908  | 678.8145902 | -2.539179444 | 5.93E-09 | 5.49E-08 | RBFOX2     |
| ENSG00000123496 | 0.308355904 | 66.64336435 | -7.675980562 | 5.96E-09 | 5.53E-08 | IL13RA2    |
| ENSG00000178665 | 99.29566008 | 12.35130601 | 2.997873772  | 6.02E-09 | 5.58E-08 | ZNF713     |

|                 |             |             |              |          |          |            |
|-----------------|-------------|-------------|--------------|----------|----------|------------|
| ENSG00000051825 | 182.3262829 | 458.0468906 | -1.329550902 | 6.04E-09 | 5.59E-08 | MPHOSPH9   |
| ENSG00000131351 | 93.81609923 | 303.2077351 | -1.6930647   | 6.04E-09 | 5.60E-08 | HAUS8      |
| ENSG00000269713 | 141.9111023 | 463.7099171 | -1.707290627 | 6.20E-09 | 5.74E-08 | NBPF9      |
| ENSG00000185278 | 822.6415834 | 205.218403  | 2.00267842   | 6.22E-09 | 5.75E-08 | ZBTB37     |
| ENSG00000162383 | 46.95764036 | 0           | 7.887505117  | 6.22E-09 | 5.75E-08 | SLC1A7     |
| ENSG00000130449 | 1860.123488 | 326.606729  | 2.510163344  | 6.28E-09 | 5.80E-08 | ZSWIM6     |
| ENSG00000170445 | 1093.187229 | 2480.745436 | -1.182284728 | 6.30E-09 | 5.82E-08 | HARS       |
| ENSG00000156509 | 3.634796025 | 44.5160783  | -3.614725243 | 6.30E-09 | 5.82E-08 | FBXO43     |
| ENSG00000078487 | 212.3669014 | 65.19410394 | 1.701391098  | 6.34E-09 | 5.85E-08 | ZCWPW1     |
| ENSG00000229671 | 42.93432549 | 0           | 7.757222036  | 6.39E-09 | 5.90E-08 | LINC01150  |
| novel.445       | 11.25558185 | 67.67669601 | -2.590557483 | 6.39E-09 | 5.90E-08 | -          |
| ENSG00000134115 | 56.55686176 | 0           | 8.155712259  | 6.50E-09 | 6.00E-08 | CNTN6      |
| ENSG00000261888 | 210.6185257 | 19.75364418 | 3.404348096  | 6.55E-09 | 6.04E-08 | AC144831.1 |
| ENSG00000183734 | 86.81538672 | 2.587817834 | 5.091079104  | 6.62E-09 | 6.11E-08 | ASCL2      |
| novel.492       | 565.8769015 | 2473.257449 | -2.127718447 | 6.64E-09 | 6.12E-08 | -          |
| ENSG00000197043 | 2933.653759 | 9279.58211  | -1.661375031 | 6.68E-09 | 6.15E-08 | ANXA6      |
| ENSG00000132837 | 83.25072445 | 11.27223236 | 2.872544499  | 6.92E-09 | 6.38E-08 | DMGDH      |
| ENSG00000275395 | 116.4861919 | 1.029478846 | 6.77767408   | 6.93E-09 | 6.38E-08 | FCGBP      |
| ENSG00000101310 | 597.3001671 | 1627.512824 | -1.446263752 | 6.95E-09 | 6.40E-08 | SEC23B     |
| ENSG00000163617 | 294.6773443 | 69.3388481  | 2.089133144  | 6.97E-09 | 6.41E-08 | CCDC191    |
| ENSG00000197170 | 835.3158132 | 1759.216452 | -1.074689704 | 6.97E-09 | 6.41E-08 | PSMD12     |
| ENSG00000147642 | 219.9074693 | 12.54729225 | 4.122719466  | 6.98E-09 | 6.42E-08 | SYBU       |
| ENSG00000103507 | 639.621443  | 1802.812911 | -1.494834462 | 7.00E-09 | 6.43E-08 | BCKDK      |
| ENSG00000100311 | 1274.655701 | 174.4612122 | 2.870501261  | 7.04E-09 | 6.46E-08 | PDGFB      |
| ENSG00000129422 | 1175.881586 | 27.39925164 | 5.419265587  | 7.16E-09 | 6.58E-08 | MTUS1      |
| ENSG00000170054 | 0           | 53.63584837 | -8.324979676 | 7.19E-09 | 6.61E-08 | SERPINA9   |
| ENSG00000161640 | 45.74993046 | 0           | 7.848823598  | 7.23E-09 | 6.63E-08 | SIGLEC11   |
| novel.552       | 16.56074228 | 270.5989897 | -4.032843863 | 7.29E-09 | 6.69E-08 | -          |
| ENSG00000116750 | 401.0098002 | 929.634524  | -1.21336907  | 7.34E-09 | 6.73E-08 | UCHL5      |
| ENSG00000095637 | 7656.580476 | 230.4885791 | 5.053389765  | 7.38E-09 | 6.76E-08 | SORBS1     |
| ENSG00000164172 | 1964.270906 | 751.2868037 | 1.386554541  | 7.42E-09 | 6.80E-08 | MOCS2      |
| ENSG00000182180 | 663.5939382 | 1729.529148 | -1.382229671 | 7.47E-09 | 6.84E-08 | MRPS16     |
| ENSG00000065717 | 873.3458863 | 96.01723456 | 3.18335881   | 7.48E-09 | 6.85E-08 | TLE2       |
| ENSG00000138829 | 150.2739788 | 4618.615676 | -4.94198347  | 7.53E-09 | 6.90E-08 | FBN2       |
| ENSG00000233005 | 66.70137973 | 0           | 8.393998642  | 7.58E-09 | 6.94E-08 | AC018742.1 |
| ENSG00000203710 | 93.29415162 | 0           | 8.877189392  | 7.59E-09 | 6.94E-08 | CR1        |
| ENSG00000176593 | 267.7537061 | 68.62602686 | 1.963337251  | 7.79E-09 | 7.13E-08 | AC008969.1 |
| ENSG00000041515 | 149.1302202 | 27.26894809 | 2.45617734   | 7.83E-09 | 7.16E-08 | MYO16      |
| ENSG00000169031 | 580.3770748 | 60.21239956 | 3.266011243  | 7.87E-09 | 7.19E-08 | COL4A3     |
| ENSG00000131471 | 179.7670488 | 9.914455938 | 4.188479762  | 7.87E-09 | 7.19E-08 | AOC3       |
| ENSG00000112175 | 104.9716305 | 0           | 9.04737689   | 7.89E-09 | 7.21E-08 | BMP5       |
| ENSG00000135245 | 133.0819224 | 1264.457081 | -3.248109024 | 8.05E-09 | 7.35E-08 | HILPDA     |
| ENSG00000085788 | 2344.097833 | 715.6519652 | 1.711987007  | 8.10E-09 | 7.40E-08 | DDHD2      |
| ENSG00000104885 | 570.4364517 | 2105.248746 | -1.883604048 | 8.16E-09 | 7.45E-08 | DOT1L      |
| ENSG00000172534 | 899.5023076 | 1760.836608 | -0.969108555 | 8.19E-09 | 7.47E-08 | HCFC1      |
| ENSG00000140022 | 104.0675188 | 0.336469917 | 8.073001626  | 8.22E-09 | 7.50E-08 | STON2      |
| ENSG00000011021 | 1270.094301 | 429.365049  | 1.564772057  | 8.23E-09 | 7.50E-08 | CLCN6      |
| novel.85        | 73.99439201 | 0.356539013 | 7.581743849  | 8.26E-09 | 7.52E-08 | -          |
| ENSG00000173432 | 0.921306765 | 3156.821482 | -11.74817171 | 8.29E-09 | 7.55E-08 | SAA1       |
| ENSG00000064652 | 1096.422398 | 318.2912298 | 1.78463057   | 8.37E-09 | 7.61E-08 | SNX24      |
| ENSG00000080608 | 354.8540136 | 1119.346277 | -1.657712257 | 8.37E-09 | 7.61E-08 | PUM3       |



|                 |             |             |              |          |          |            |
|-----------------|-------------|-------------|--------------|----------|----------|------------|
| ENSG00000128298 | 126.7452481 | 24.25377147 | 2.389880798  | 8.38E-09 | 7.62E-08 | BAIAP2L2   |
| ENSG00000259275 | 382.6712945 | 31.94324154 | 3.57703398   | 8.39E-09 | 7.63E-08 | AC087477.2 |
| ENSG00000163874 | 141.3083937 | 2403.840472 | -4.088343401 | 8.41E-09 | 7.64E-08 | ZC3H12A    |
| ENSG00000063180 | 405.8130982 | 33.5140724  | 3.601887066  | 8.41E-09 | 7.64E-08 | CA11       |
| ENSG00000089157 | 12913.15747 | 35035.35772 | -1.439979476 | 8.46E-09 | 7.68E-08 | RPLP0      |
| ENSG00000128708 | 541.1800052 | 1326.744695 | -1.293999531 | 8.46E-09 | 7.68E-08 | HAT1       |
| ENSG00000119041 | 446.8290095 | 986.6730264 | -1.143029785 | 8.48E-09 | 7.70E-08 | GTF3C3     |
| ENSG00000115884 | 59.18678278 | 708.3565823 | -3.58213022  | 8.49E-09 | 7.70E-08 | SDC1       |
| ENSG00000144649 | 121.7422028 | 4.514592589 | 4.733619034  | 8.52E-09 | 7.73E-08 | GASK1A     |
| ENSG00000149968 | 2.157237677 | 4109.664974 | -10.89938543 | 8.61E-09 | 7.81E-08 | MMP3       |
| ENSG00000104976 | 286.7979057 | 842.7664235 | -1.554970425 | 8.64E-09 | 7.83E-08 | SNAPC2     |
| ENSG00000138346 | 57.59017089 | 204.9486904 | -1.830192046 | 8.65E-09 | 7.84E-08 | DNA2       |
| ENSG00000171241 | 194.7678076 | 1292.141895 | -2.72963921  | 8.81E-09 | 7.99E-08 | SHCBP1     |
| ENSG00000168679 | 632.6593255 | 171.0146609 | 1.886281294  | 8.94E-09 | 8.09E-08 | SLC16A4    |
| ENSG00000154258 | 1643.153526 | 42.59585328 | 5.266926592  | 9.10E-09 | 8.24E-08 | ABCA9      |
| ENSG00000164300 | 1339.784666 | 235.007654  | 2.510214842  | 9.18E-09 | 8.31E-08 | SERINC5    |
| ENSG00000166979 | 401.127145  | 95.66159463 | 2.065280114  | 9.19E-09 | 8.31E-08 | EVA1C      |
| ENSG00000278970 | 161.3751619 | 38.75479565 | 2.061168298  | 9.23E-09 | 8.35E-08 | HEIH       |
| ENSG00000131196 | 448.5088337 | 152.944441  | 1.550535078  | 9.24E-09 | 8.36E-08 | NFATC1     |
| ENSG00000163170 | 133.4986622 | 453.2425635 | -1.764275195 | 9.26E-09 | 8.37E-08 | BOLA3      |
| ENSG00000186106 | 412.5129496 | 135.5637152 | 1.604631767  | 9.29E-09 | 8.39E-08 | ANKRD46    |
| ENSG00000249565 | 31.64099163 | 133.5840064 | -2.080484144 | 9.35E-09 | 8.44E-08 | SERBP1P5   |
| ENSG00000148158 | 619.8810529 | 226.0547984 | 1.456266311  | 9.40E-09 | 8.49E-08 | SNX30      |
| ENSG00000166396 | 0           | 872.2668778 | -12.34972082 | 9.50E-09 | 8.58E-08 | SERPINB7   |
| ENSG00000158813 | 90.00948136 | 6.584162767 | 3.751070772  | 9.51E-09 | 8.58E-08 | EDA        |
| ENSG00000133121 | 4867.189953 | 902.4655487 | 2.43099234   | 9.57E-09 | 8.63E-08 | STARD13    |
| ENSG00000159618 | 87.77394694 | 0.356539013 | 7.827386983  | 9.64E-09 | 8.69E-08 | ADGRG5     |
| ENSG00000178562 | 62.94200106 | 1.00940975  | 5.886927696  | 9.68E-09 | 8.73E-08 | CD28       |
| ENSG00000071967 | 5449.949344 | 1854.856573 | 1.554953934  | 9.72E-09 | 8.76E-08 | CYBRD1     |
| ENSG00000281692 | 63.73498019 | 0           | 8.328389092  | 9.89E-09 | 8.90E-08 | PACRG-AS1  |
| ENSG00000109927 | 71.11470805 | 8.386798532 | 3.095667397  | 9.89E-09 | 8.90E-08 | TECTA      |
| ENSG00000103876 | 307.9239966 | 804.2306237 | -1.384747917 | 9.95E-09 | 8.95E-08 | FAH        |
| ENSG00000116473 | 2633.735641 | 1162.501648 | 1.179983945  | 1.00E-08 | 9.01E-08 | RAP1A      |
| ENSG00000164946 | 144.7094973 | 0.723690511 | 7.652593874  | 1.00E-08 | 9.02E-08 | FREM1      |
| ENSG00000154134 | 1153.604403 | 378.0100274 | 1.610283733  | 1.01E-08 | 9.10E-08 | ROBO3      |
| ENSG00000235636 | 9.689840462 | 80.02286494 | -3.043849673 | 1.02E-08 | 9.16E-08 | NUS1P1     |
| ENSG00000164398 | 99.79531114 | 1.069617038 | 6.53587888   | 1.02E-08 | 9.18E-08 | ACSL6      |
| novel.3         | 2.153476731 | 56.99340268 | -4.738387141 | 1.03E-08 | 9.22E-08 | -          |
| ENSG00000126767 | 512.0586563 | 1291.633263 | -1.334797751 | 1.03E-08 | 9.25E-08 | ELK1       |
| ENSG00000056972 | 102.8001472 | 654.590311  | -2.670484606 | 1.04E-08 | 9.29E-08 | TRAF3IP2   |
| ENSG00000170837 | 90.9265008  | 1.702418679 | 5.69310928   | 1.04E-08 | 9.29E-08 | GPR27      |
| ENSG00000122218 | 3268.17947  | 8377.975858 | -1.35807508  | 1.04E-08 | 9.32E-08 | COPA       |
| ENSG00000163629 | 1586.135116 | 558.912268  | 1.504659455  | 1.05E-08 | 9.37E-08 | PTPN13     |
| ENSG00000213516 | 861.733675  | 316.4687817 | 1.445095768  | 1.05E-08 | 9.37E-08 | RBMXL1     |
| ENSG00000111664 | 38.19057378 | 138.0911501 | -1.854062604 | 1.05E-08 | 9.37E-08 | GNB3       |
| ENSG00000105568 | 2726.863723 | 7291.136761 | -1.418916348 | 1.05E-08 | 9.38E-08 | PPP2R1A    |
| ENSG00000139973 | 0.308355904 | 58.96789285 | -7.503006093 | 1.05E-08 | 9.42E-08 | SYT16      |
| ENSG00000137098 | 75.72124187 | 12.44335075 | 2.599451627  | 1.05E-08 | 9.42E-08 | SPAG8      |
| ENSG00000163762 | 188.4375128 | 12.14586315 | 3.953458291  | 1.05E-08 | 9.42E-08 | TM4SF18    |
| ENSG00000286710 | 46.98070424 | 0           | 7.887189216  | 1.07E-08 | 9.55E-08 | AC188617.1 |
| ENSG00000257167 | 15.79656958 | 87.39366962 | -2.470634162 | 1.08E-08 | 9.65E-08 | TMPO-AS1   |

|                 |             |             |              |          |          |            |
|-----------------|-------------|-------------|--------------|----------|----------|------------|
| ENSG00000107864 | 162.1047027 | 19.16098073 | 3.07012908   | 1.08E-08 | 9.69E-08 | CPEB3      |
| ENSG00000169684 | 3.064683035 | 46.68483808 | -3.939930399 | 1.09E-08 | 9.70E-08 | CHRNA5     |
| ENSG00000168743 | 62.02585143 | 0.336469917 | 7.326282609  | 1.09E-08 | 9.72E-08 | NPNT       |
| ENSG00000172939 | 872.8907592 | 2833.013009 | -1.698313156 | 1.09E-08 | 9.76E-08 | OXSR1      |
| ENSG00000243279 | 201.8307165 | 474.242033  | -1.232462964 | 1.10E-08 | 9.79E-08 | PRAF2      |
| ENSG00000176986 | 473.2343612 | 1301.832911 | -1.459842341 | 1.10E-08 | 9.81E-08 | SEC24C     |
| ENSG00000186076 | 30.1936634  | 183.2113222 | -2.602811856 | 1.10E-08 | 9.84E-08 | AC012085.1 |
| ENSG00000106823 | 974.6204186 | 24.82906276 | 5.290681582  | 1.12E-08 | 9.96E-08 | ECM2       |
| ENSG00000153234 | 1856.993653 | 298.1349663 | 2.638664376  | 1.12E-08 | 9.96E-08 | NR4A2      |
| ENSG00000135249 | 175.9465139 | 417.2505094 | -1.246275341 | 1.12E-08 | 1.00E-07 | RINT1      |
| ENSG00000105991 | 9.097090523 | 74.89943979 | -3.04253011  | 1.15E-08 | 1.02E-07 | HOXA1      |
| ENSG00000188511 | 41.1908931  | 0           | 7.697956744  | 1.16E-08 | 1.04E-07 | C22orf34   |
| ENSG00000135750 | 60.18567428 | 321.2600224 | -2.415896587 | 1.17E-08 | 1.04E-07 | KCNK1      |
| ENSG00000196381 | 73.3995617  | 6.961926751 | 3.37716161   | 1.17E-08 | 1.04E-07 | ZNF781     |
| ENSG00000147027 | 1213.598182 | 310.2893869 | 1.966998889  | 1.19E-08 | 1.05E-07 | TMEM47     |
| ENSG00000135426 | 69.61801644 | 0           | 8.454726058  | 1.19E-08 | 1.06E-07 | TESPA1     |
| ENSG00000168040 | 123.4711334 | 355.3395912 | -1.525861492 | 1.19E-08 | 1.06E-07 | FADD       |
| ENSG00000102001 | 45.27871388 | 1.41669944  | 4.983081633  | 1.19E-08 | 1.06E-07 | CACNA1F    |
| ENSG00000174989 | 226.1059126 | 525.7052685 | -1.217242433 | 1.20E-08 | 1.06E-07 | FBXW8      |
| ENSG00000178531 | 34.65141141 | 170.9821815 | -2.303965593 | 1.22E-08 | 1.08E-07 | CTXN1      |
| ENSG00000174332 | 6.776307989 | 169.4586337 | -4.650578356 | 1.22E-08 | 1.08E-07 | GLIS1      |
| ENSG00000165655 | 2122.460758 | 394.7524418 | 2.426491448  | 1.22E-08 | 1.08E-07 | ZNF503     |
| ENSG00000225964 | 68.22792983 | 1.130980201 | 5.969648023  | 1.22E-08 | 1.08E-07 | NRIR       |
| ENSG00000135631 | 418.3650159 | 1954.236869 | -2.223733753 | 1.23E-08 | 1.09E-07 | RAB11FIP5  |
| ENSG00000132199 | 281.5137291 | 1019.963454 | -1.857263348 | 1.24E-08 | 1.10E-07 | ENOSF1     |
| ENSG00000105438 | 1831.834592 | 5684.555254 | -1.633758444 | 1.24E-08 | 1.10E-07 | KDELR1     |
| ENSG00000135047 | 1996.049107 | 7349.446237 | -1.880482766 | 1.27E-08 | 1.13E-07 | CTSL       |
| ENSG00000148200 | 87.94061235 | 12.94152931 | 2.765897446  | 1.29E-08 | 1.14E-07 | NR6A1      |
| ENSG00000196313 | 433.3230636 | 1024.083295 | -1.240535152 | 1.29E-08 | 1.14E-07 | POM121     |
| ENSG00000130226 | 87.53546789 | 0.387220594 | 7.823310789  | 1.29E-08 | 1.14E-07 | DPP6       |
| ENSG00000271936 | 4.193554905 | 55.35162365 | -3.715793608 | 1.30E-08 | 1.15E-07 | AC012073.1 |
| ENSG00000136274 | 704.8408074 | 152.3175815 | 2.211932375  | 1.31E-08 | 1.16E-07 | NACAD      |
| ENSG00000111358 | 465.8643347 | 980.9320359 | -1.074378251 | 1.31E-08 | 1.16E-07 | GTF2H3     |
| ENSG00000159082 | 441.2329737 | 162.8105392 | 1.437407032  | 1.33E-08 | 1.18E-07 | SYNJ1      |
| ENSG00000026751 | 104.2148368 | 0           | 9.036925357  | 1.33E-08 | 1.18E-07 | SLAMF7     |
| ENSG00000158864 | 1095.423786 | 2550.726551 | -1.219441243 | 1.35E-08 | 1.19E-07 | NDUFS2     |
| ENSG00000105374 | 124.482802  | 3.637365776 | 5.104125097  | 1.36E-08 | 1.20E-07 | NKG7       |
| ENSG00000132840 | 506.2167885 | 75.46424699 | 2.743154231  | 1.36E-08 | 1.20E-07 | BHMT2      |
| ENSG00000175899 | 8982.261704 | 617.82039   | 3.861515567  | 1.36E-08 | 1.20E-07 | A2M        |
| ENSG00000075415 | 4271.99766  | 9406.241728 | -1.138736549 | 1.38E-08 | 1.21E-07 | SLC25A3    |
| novel.160       | 99.42041275 | 14.7774152  | 2.739696426  | 1.38E-08 | 1.22E-07 | -          |
| ENSG00000175352 | 19.52449197 | 205.6099434 | -3.397818156 | 1.38E-08 | 1.22E-07 | NRIP3      |
| ENSG00000220205 | 1728.735381 | 683.3768432 | 1.33940176   | 1.38E-08 | 1.22E-07 | VAMP2      |
| ENSG00000196074 | 197.149948  | 20.73682027 | 3.253283134  | 1.38E-08 | 1.22E-07 | SYCP2      |
| novel.223       | 38.30243395 | 0           | 7.593538326  | 1.39E-08 | 1.22E-07 | -          |
| ENSG00000227517 | 0           | 46.65214872 | -8.127136773 | 1.39E-08 | 1.23E-07 | LINC01483  |
| ENSG00000224660 | 521.1616197 | 103.0752688 | 2.337911668  | 1.39E-08 | 1.23E-07 | SH3BP5-AS1 |
| ENSG00000100749 | 160.9977127 | 520.2172604 | -1.692700024 | 1.41E-08 | 1.24E-07 | VRK1       |
| ENSG00000046653 | 21808.50135 | 535.8954298 | 5.346582828  | 1.42E-08 | 1.25E-07 | GPM6B      |
| ENSG00000228577 | 120.5235546 | 0.356539013 | 8.285508278  | 1.43E-08 | 1.26E-07 | AC010731.2 |
| ENSG00000273344 | 216.8743253 | 76.57356985 | 1.502668799  | 1.44E-08 | 1.27E-07 | PAXIP1-AS1 |

|                 |             |             |              |          |          |            |
|-----------------|-------------|-------------|--------------|----------|----------|------------|
| ENSG00000117569 | 961.6912509 | 240.9358171 | 1.997343464  | 1.45E-08 | 1.27E-07 | PTBP2      |
| ENSG00000146215 | 36.77820552 | 0           | 7.535048402  | 1.45E-08 | 1.27E-07 | CRIP3      |
| ENSG00000178966 | 90.23048059 | 279.0709106 | -1.629923243 | 1.45E-08 | 1.28E-07 | RMI1       |
| ENSG00000260805 | 73.42205645 | 8.040872005 | 3.203475632  | 1.46E-08 | 1.28E-07 | AC092803.2 |
| ENSG00000266524 | 106.0896888 | 0           | 9.062653277  | 1.46E-08 | 1.28E-07 | GDF10      |
| ENSG00000112214 | 51.91976965 | 0           | 8.031482728  | 1.46E-08 | 1.28E-07 | FHL5       |
| ENSG00000237181 | 47.61983953 | 2.527610546 | 4.241965486  | 1.46E-08 | 1.28E-07 | AC147651.4 |
| ENSG00000163884 | 419.7435241 | 45.6014449  | 3.198049347  | 1.47E-08 | 1.29E-07 | KLF15      |
| ENSG00000198753 | 4226.122105 | 304.0808738 | 3.797251828  | 1.49E-08 | 1.30E-07 | PLXNB3     |
| ENSG00000168487 | 1440.24369  | 3452.927426 | -1.261464452 | 1.50E-08 | 1.31E-07 | BMP1       |
| ENSG00000243444 | 14.74674921 | 82.77855597 | -2.484478603 | 1.52E-08 | 1.33E-07 | PALM2      |
| ENSG00000148606 | 401.0014672 | 1086.117116 | -1.43713544  | 1.53E-08 | 1.33E-07 | POLR3A     |
| ENSG00000189190 | 163.0602575 | 39.93909506 | 2.027512645  | 1.53E-08 | 1.34E-07 | ZNF600     |
| ENSG00000285756 | 75.34937681 | 287.6708447 | -1.933409809 | 1.54E-08 | 1.35E-07 | BX890604.2 |
| ENSG00000137601 | 1295.268675 | 413.1438485 | 1.64801487   | 1.54E-08 | 1.35E-07 | NEK1       |
| ENSG00000168685 | 94.87644665 | 1154.485267 | -3.605509251 | 1.54E-08 | 1.35E-07 | IL7R       |
| ENSG00000237484 | 38.34806385 | 0           | 7.594257673  | 1.54E-08 | 1.35E-07 | LINC01684  |
| ENSG00000160224 | 69.6610403  | 0.774441189 | 6.586331442  | 1.54E-08 | 1.35E-07 | AIRE       |
| ENSG00000287792 | 39.4538715  | 0           | 7.636364877  | 1.55E-08 | 1.36E-07 | AC140118.2 |
| ENSG00000260442 | 8.47529285  | 59.50710869 | -2.811799259 | 1.56E-08 | 1.36E-07 | ATP2A1-AS1 |
| ENSG00000173681 | 453.8607076 | 169.1900298 | 1.423996541  | 1.56E-08 | 1.36E-07 | BCLAF3     |
| ENSG00000142156 | 9842.677741 | 78531.89974 | -2.996157455 | 1.56E-08 | 1.36E-07 | COL6A1     |
| ENSG00000196584 | 27.44596961 | 226.3130937 | -3.043161514 | 1.56E-08 | 1.36E-07 | XRCC2      |
| ENSG00000113273 | 346.018466  | 863.5994786 | -1.319865898 | 1.59E-08 | 1.38E-07 | ARSB       |
| ENSG00000169855 | 191.9787976 | 1324.17484  | -2.786266143 | 1.59E-08 | 1.39E-07 | ROBO1      |
| ENSG00000167984 | 135.9882886 | 18.1703558  | 2.900424713  | 1.60E-08 | 1.39E-07 | NLRC3      |
| ENSG00000162367 | 124.5907041 | 0.743759607 | 7.426625711  | 1.61E-08 | 1.40E-07 | TAL1       |
| ENSG00000143179 | 372.5297657 | 1142.870241 | -1.617602748 | 1.61E-08 | 1.40E-07 | UCK2       |
| ENSG00000185986 | 306.3808925 | 34.38941983 | 3.149005088  | 1.61E-08 | 1.40E-07 | SDHAP3     |
| ENSG00000215218 | 83.95486385 | 1.854670712 | 5.528845156  | 1.63E-08 | 1.42E-07 | UBE2QL1    |
| ENSG00000104154 | 525.6355355 | 176.5591178 | 1.574375241  | 1.65E-08 | 1.43E-07 | SLC30A4    |
| ENSG00000145284 | 1247.018404 | 307.8607439 | 2.018984649  | 1.65E-08 | 1.43E-07 | SCD5       |
| ENSG00000137124 | 202.0217273 | 758.0873726 | -1.908443659 | 1.65E-08 | 1.43E-07 | ALDH1B1    |
| ENSG00000148634 | 1059.588858 | 2374.706636 | -1.164128197 | 1.65E-08 | 1.44E-07 | HERC4      |
| ENSG00000175395 | 658.9966951 | 235.6072399 | 1.484058075  | 1.67E-08 | 1.45E-07 | ZNF25      |
| ENSG00000167766 | 1603.12797  | 598.5767233 | 1.421669483  | 1.67E-08 | 1.45E-07 | ZNF83      |
| ENSG00000117519 | 9640.094038 | 1995.06818  | 2.272472603  | 1.68E-08 | 1.46E-07 | CNN3       |
| ENSG00000237517 | 37.32979851 | 0           | 7.555724887  | 1.69E-08 | 1.47E-07 | DGCR5      |
| ENSG00000107789 | 235.7175562 | 675.1603234 | -1.518747561 | 1.69E-08 | 1.47E-07 | MINPP1     |
| ENSG00000143761 | 5876.43528  | 12553.9141  | -1.095115835 | 1.71E-08 | 1.48E-07 | ARF1       |
| ENSG00000169385 | 45.59605914 | 0           | 7.844766671  | 1.71E-08 | 1.48E-07 | RNASE2     |
| ENSG00000136205 | 15551.53987 | 2695.536197 | 2.528510892  | 1.72E-08 | 1.49E-07 | TNS3       |
| ENSG00000225746 | 64.88748576 | 286.5938601 | -2.142064173 | 1.72E-08 | 1.49E-07 | MEG8       |
| ENSG00000015532 | 552.2843927 | 2179.121718 | -1.980245608 | 1.72E-08 | 1.49E-07 | XYLT2      |
| ENSG00000167703 | 75.07193485 | 4.1272436   | 4.217549563  | 1.72E-08 | 1.49E-07 | SLC43A2    |
| ENSG00000084453 | 39.17115839 | 0           | 7.625170869  | 1.74E-08 | 1.50E-07 | SLCO1A2    |
| novel.322       | 81.22644586 | 0           | 8.677758532  | 1.75E-08 | 1.51E-07 | -          |
| ENSG00000251144 | 0           | 67.0138079  | -8.646361395 | 1.75E-08 | 1.51E-07 | AC113346.1 |
| ENSG00000095380 | 463.4749572 | 1209.129537 | -1.383356271 | 1.76E-08 | 1.52E-07 | NANS       |
| ENSG00000173727 | 54.19979433 | 231.5485046 | -2.093948153 | 1.76E-08 | 1.52E-07 | AP000769.1 |
| ENSG00000102445 | 435.8322505 | 14.02034617 | 4.968244575  | 1.77E-08 | 1.52E-07 | RUBCNL     |

|                 |             |             |              |          |          |            |
|-----------------|-------------|-------------|--------------|----------|----------|------------|
| ENSG00000088881 | 441.8284879 | 34.49254378 | 3.685292445  | 1.77E-08 | 1.52E-07 | EBF4       |
| ENSG00000198785 | 119.3797933 | 0.336469917 | 8.27109864   | 1.77E-08 | 1.53E-07 | GRIN3A     |
| ENSG00000180787 | 265.8567147 | 45.46206992 | 2.54383368   | 1.77E-08 | 1.53E-07 | ZFP3       |
| ENSG00000172915 | 383.0312916 | 89.42775914 | 2.099546799  | 1.78E-08 | 1.53E-07 | NBEA       |
| ENSG00000279881 | 0.925067711 | 54.35483417 | -5.895715765 | 1.78E-08 | 1.54E-07 | AC041040.1 |
| ENSG00000026297 | 1928.418252 | 329.3710032 | 2.548836814  | 1.78E-08 | 1.54E-07 | RNASSET2   |
| ENSG00000108602 | 62.83437255 | 2.618499415 | 4.621587688  | 1.79E-08 | 1.54E-07 | ALDH3A1    |
| ENSG00000179091 | 1537.359378 | 3285.581905 | -1.095654301 | 1.79E-08 | 1.54E-07 | CYC1       |
| ENSG00000118263 | 319.5648342 | 1230.014075 | -1.944380355 | 1.79E-08 | 1.54E-07 | KLF7       |
| ENSG00000121310 | 1133.319657 | 277.7267003 | 2.028012192  | 1.80E-08 | 1.55E-07 | ECHDC2     |
| ENSG00000126602 | 603.5924964 | 1594.303992 | -1.401158469 | 1.81E-08 | 1.56E-07 | TRAP1      |
| novel.1004      | 1.536764924 | 61.47851674 | -5.335668634 | 1.83E-08 | 1.57E-07 | -          |
| ENSG00000105738 | 250.3985455 | 1452.6695   | -2.536311024 | 1.83E-08 | 1.58E-07 | SIPA1L3    |
| ENSG00000049089 | 474.0656741 | 70.4754321  | 2.752571874  | 1.84E-08 | 1.58E-07 | COL9A2     |
| novel.1017      | 68.12742341 | 1.682349583 | 5.2779404    | 1.85E-08 | 1.59E-07 | -          |
| ENSG00000163947 | 411.8058315 | 81.9325715  | 2.326931439  | 1.90E-08 | 1.63E-07 | ARHGEF3    |
| ENSG00000134452 | 830.2999189 | 1641.960306 | -0.983660817 | 1.90E-08 | 1.63E-07 | FBH1       |
| ENSG00000186231 | 68.66522627 | 0.336469917 | 7.47292775   | 1.94E-08 | 1.67E-07 | KLHL32     |
| ENSG00000088387 | 1198.796123 | 215.8016548 | 2.472917195  | 1.96E-08 | 1.68E-07 | DOCK9      |
| ENSG00000196220 | 215.2967313 | 27.73631667 | 2.964274304  | 1.99E-08 | 1.71E-07 | SRGAP3     |
| ENSG00000068120 | 672.7938286 | 1659.516308 | -1.302451638 | 2.02E-08 | 1.73E-07 | COASY      |
| ENSG00000175550 | 2494.862652 | 6061.645353 | -1.280728031 | 2.02E-08 | 1.73E-07 | DRAP1      |
| ENSG00000143862 | 2074.999938 | 730.0084905 | 1.507488786  | 2.02E-08 | 1.73E-07 | ARL8A      |
| ENSG00000120306 | 739.5549131 | 315.9705219 | 1.226436434  | 2.04E-08 | 1.75E-07 | CYSTM1     |
| ENSG00000109654 | 1151.688008 | 342.8502757 | 1.747894373  | 2.06E-08 | 1.76E-07 | TRIM2      |
| ENSG00000100033 | 69.88411991 | 0           | 8.461147126  | 2.06E-08 | 1.77E-07 | PRODH      |
| ENSG00000186409 | 99.02659456 | 18.06872605 | 2.458032084  | 2.10E-08 | 1.80E-07 | CCDC30     |
| novel.1099      | 37.64413792 | 0           | 7.568654135  | 2.13E-08 | 1.82E-07 | -          |
| ENSG00000132530 | 635.6814395 | 259.0619248 | 1.294652242  | 2.13E-08 | 1.83E-07 | XAF1       |
| ENSG00000142303 | 674.4119389 | 288.6619836 | 1.225025003  | 2.13E-08 | 1.83E-07 | ADAMTS10   |
| ENSG00000279660 | 33.66344745 | 0           | 7.406614481  | 2.14E-08 | 1.83E-07 | AC005703.6 |
| ENSG00000121316 | 515.8358381 | 22.14791591 | 4.536313015  | 2.14E-08 | 1.83E-07 | PLBD1      |
| ENSG00000180767 | 39.92515935 | 0           | 7.652370878  | 2.14E-08 | 1.83E-07 | CHST13     |
| ENSG00000188641 | 817.4797349 | 290.347976  | 1.492336665  | 2.15E-08 | 1.84E-07 | DPYD       |
| ENSG00000259834 | 49.88323861 | 0           | 7.97363655   | 2.16E-08 | 1.85E-07 | AL365361.1 |
| ENSG00000110975 | 102.1210533 | 0           | 9.008159302  | 2.19E-08 | 1.87E-07 | SYT10      |
| novel.210       | 0           | 533.4220434 | -11.64020923 | 2.24E-08 | 1.92E-07 | -          |
| ENSG00000151623 | 196.2828888 | 8.8591758   | 4.451893139  | 2.25E-08 | 1.92E-07 | NR3C2      |
| ENSG00000206172 | 38.0747392  | 0           | 7.584698633  | 2.26E-08 | 1.92E-07 | HBA1       |
| ENSG00000103152 | 468.3546453 | 1251.551339 | -1.417787564 | 2.27E-08 | 1.93E-07 | MPG        |
| ENSG00000154146 | 40.25572493 | 397.4140894 | -3.302873226 | 2.31E-08 | 1.97E-07 | NRGN       |
| ENSG00000111897 | 8645.540432 | 3800.233396 | 1.185851252  | 2.31E-08 | 1.97E-07 | SERINC1    |
| ENSG00000170011 | 50.80057096 | 2.079026788 | 4.574589485  | 2.31E-08 | 1.97E-07 | MYRIP      |
| ENSG00000261799 | 301.6470988 | 106.6911528 | 1.500768559  | 2.32E-08 | 1.97E-07 | AC007406.5 |
| ENSG00000280241 | 0.308355904 | 66.35520497 | -7.669812153 | 2.32E-08 | 1.97E-07 | AC079298.3 |
| ENSG00000113712 | 1071.454626 | 2288.811854 | -1.095029322 | 2.33E-08 | 1.98E-07 | CSNK1A1    |
| ENSG00000104611 | 19.32577368 | 324.75157   | -4.073263727 | 2.34E-08 | 1.99E-07 | SH2D4A     |
| ENSG00000136244 | 24.70433026 | 5438.066619 | -7.781535176 | 2.37E-08 | 2.01E-07 | IL6        |
| ENSG00000147676 | 156.0671941 | 0.387220594 | 8.657801781  | 2.37E-08 | 2.02E-07 | MAL2       |
| ENSG00000167815 | 1120.930284 | 2739.76778  | -1.289341833 | 2.39E-08 | 2.03E-07 | PRDX2      |
| ENSG0000019549  | 131.5725514 | 3056.473252 | -4.538228478 | 2.40E-08 | 2.04E-07 | SNAI2      |

|                 |             |             |              |          |          |              |
|-----------------|-------------|-------------|--------------|----------|----------|--------------|
| ENSG00000161653 | 17.1446454  | 241.6214115 | -3.818649255 | 2.42E-08 | 2.05E-07 | NAGS         |
| ENSG00000115523 | 41.37073539 | 0           | 7.704488675  | 2.43E-08 | 2.06E-07 | GNLY         |
| ENSG00000152520 | 1287.140761 | 441.8265767 | 1.543136181  | 2.43E-08 | 2.06E-07 | PAN3         |
| ENSG00000233672 | 47.36671579 | 4.01512976  | 3.576718255  | 2.43E-08 | 2.06E-07 | RNASEH2B-AS1 |
| ENSG00000141744 | 61.29585578 | 0           | 8.27207973   | 2.43E-08 | 2.06E-07 | PNMT         |
| ENSG00000147255 | 63.3611773  | 0.774441189 | 6.449964458  | 2.44E-08 | 2.07E-07 | IGSF1        |
| ENSG00000171631 | 146.044723  | 23.91730155 | 2.613412391  | 2.47E-08 | 2.09E-07 | P2RY6        |
| ENSG00000196378 | 232.4015881 | 58.41267066 | 1.993881539  | 2.47E-08 | 2.09E-07 | ZNF34        |
| ENSG00000173327 | 5013.390571 | 1675.041018 | 1.581747065  | 2.48E-08 | 2.10E-07 | MAP3K11      |
| ENSG00000232389 | 23.08503764 | 95.58319763 | -2.051191153 | 2.52E-08 | 2.13E-07 | AL583856.1   |
| ENSG00000117450 | 1834.620994 | 5054.317654 | -1.462122767 | 2.52E-08 | 2.13E-07 | PRDX1        |
| ENSG00000068878 | 673.4335059 | 1395.627309 | -1.051239529 | 2.54E-08 | 2.15E-07 | PSME4        |
| novel.39        | 0           | 38.53557665 | -7.85152724  | 2.55E-08 | 2.15E-07 | -            |
| ENSG00000184293 | 45.8670187  | 0           | 7.852497395  | 2.55E-08 | 2.15E-07 | CLECL1       |
| ENSG00000021826 | 83.04008223 | 330.747248  | -1.993810356 | 2.55E-08 | 2.15E-07 | CPS1         |
| ENSG00000273038 | 36.15669258 | 165.1792196 | -2.191908962 | 2.57E-08 | 2.17E-07 | AL365203.2   |
| ENSG00000225614 | 245.4745951 | 834.9550177 | -1.766267558 | 2.58E-08 | 2.18E-07 | ZNF469       |
| ENSG00000215483 | 245.3928544 | 11.03841967 | 4.472725203  | 2.59E-08 | 2.19E-07 | LINC00598    |
| ENSG00000156453 | 1007.030055 | 67.17334601 | 3.903416927  | 2.60E-08 | 2.19E-07 | PCDH1        |
| ENSG00000008311 | 2306.906244 | 447.9077274 | 2.364698534  | 2.60E-08 | 2.19E-07 | AASS         |
| ENSG00000185085 | 281.9705861 | 773.5611235 | -1.456190761 | 2.64E-08 | 2.23E-07 | INTS5        |
| ENSG00000155561 | 756.9628703 | 1791.26411  | -1.242475419 | 2.65E-08 | 2.24E-07 | NUP205       |
| ENSG00000165934 | 782.5300399 | 1602.062423 | -1.033808121 | 2.66E-08 | 2.24E-07 | CPSF2        |
| ENSG00000116171 | 3329.217325 | 1317.719667 | 1.336905727  | 2.69E-08 | 2.26E-07 | SCP2         |
| ENSG00000065268 | 588.7946601 | 1402.389869 | -1.252076997 | 2.69E-08 | 2.26E-07 | WDR18        |
| ENSG00000164062 | 789.6384793 | 1972.443424 | -1.320797785 | 2.69E-08 | 2.26E-07 | APEH         |
| ENSG00000075151 | 1578.629777 | 3555.102499 | -1.171151063 | 2.69E-08 | 2.26E-07 | EIF4G3       |
| ENSG00000124243 | 76.96909636 | 282.9902243 | -1.878845021 | 2.71E-08 | 2.28E-07 | BCAS4        |
| ENSG00000271913 | 96.65190513 | 25.54890046 | 1.921026396  | 2.71E-08 | 2.28E-07 | AL035530.2   |
| ENSG00000177640 | 111.364592  | 27.2927416  | 2.022331327  | 2.72E-08 | 2.29E-07 | CASC2        |
| ENSG00000186716 | 504.2983034 | 1237.794554 | -1.295151027 | 2.73E-08 | 2.30E-07 | BCR          |
| ENSG00000167088 | 617.5607259 | 1494.38568  | -1.275080855 | 2.74E-08 | 2.31E-07 | SNRPD1       |
| ENSG00000143256 | 752.0290455 | 1715.080823 | -1.189447653 | 2.77E-08 | 2.32E-07 | PFDN2        |
| ENSG00000048140 | 619.8081828 | 1483.794466 | -1.259605008 | 2.77E-08 | 2.33E-07 | TSPAN17      |
| ENSG00000205208 | 150.1036107 | 402.2738159 | -1.422268113 | 2.77E-08 | 2.33E-07 | C4orf46      |
| ENSG00000276248 | 14.7328878  | 89.26707797 | -2.594873055 | 2.78E-08 | 2.33E-07 | AL442125.1   |
| ENSG00000102007 | 727.7335372 | 2107.160653 | -1.53376121  | 2.81E-08 | 2.36E-07 | PLP2         |
| ENSG00000112599 | 85.49898064 | 13.45147623 | 2.676248204  | 2.81E-08 | 2.36E-07 | GUCA1B       |
| ENSG00000246898 | 100.6544493 | 9.509606392 | 3.394880516  | 2.82E-08 | 2.37E-07 | LINC00920    |
| ENSG00000196689 | 311.7183635 | 83.83144315 | 1.897203509  | 2.82E-08 | 2.37E-07 | TRPV1        |
| ENSG00000164414 | 344.6872296 | 137.0736152 | 1.32969729   | 2.87E-08 | 2.40E-07 | SLC35A1      |
| ENSG00000138430 | 781.532644  | 1829.818558 | -1.227511984 | 2.88E-08 | 2.42E-07 | OLA1         |
| ENSG00000164125 | 6771.680852 | 259.1510411 | 4.707112504  | 2.89E-08 | 2.42E-07 | GASK1B       |
| ENSG00000145708 | 110.1979674 | 1.426156051 | 6.265044136  | 2.96E-08 | 2.48E-07 | CRHBP        |
| ENSG00000177453 | 411.0830618 | 33.34992361 | 3.628355473  | 2.96E-08 | 2.48E-07 | NIM1K        |
| ENSG00000150403 | 1256.01023  | 3006.237076 | -1.259234756 | 2.96E-08 | 2.48E-07 | TMCO3        |
| ENSG00000174130 | 277.3406327 | 42.33709121 | 2.706489727  | 2.97E-08 | 2.48E-07 | TLR6         |
| ENSG00000105556 | 246.6665061 | 727.4695783 | -1.559968072 | 3.02E-08 | 2.53E-07 | MIER2        |
| ENSG00000108231 | 71.68972127 | 0.693008929 | 6.649163144  | 3.03E-08 | 2.54E-07 | LGI1         |
| ENSG00000136159 | 176.4995031 | 634.4301513 | -1.846325481 | 3.04E-08 | 2.54E-07 | NUDT15       |
| ENSG00000156709 | 421.1803361 | 1035.814352 | -1.298430387 | 3.05E-08 | 2.54E-07 | AIFM1        |

|                 |             |             |              |          |          |            |
|-----------------|-------------|-------------|--------------|----------|----------|------------|
| ENSG00000037474 | 942.2330146 | 1990.342829 | -1.078963949 | 3.05E-08 | 2.55E-07 | NSUN2      |
| novel.630       | 8.732035341 | 83.75900077 | -3.260908405 | 3.05E-08 | 2.55E-07 | -          |
| ENSG00000238273 | 10.05740294 | 82.73307077 | -3.0451812   | 3.05E-08 | 2.55E-07 | AC108058.1 |
| ENSG00000167264 | 136.84244   | 401.6995181 | -1.554241192 | 3.05E-08 | 2.55E-07 | DUS2       |
| ENSG00000118707 | 737.9499258 | 279.2793887 | 1.401495123  | 3.06E-08 | 2.55E-07 | TGIF2      |
| ENSG00000286593 | 34.86796587 | 0           | 7.457405847  | 3.06E-08 | 2.55E-07 | AP006261.1 |
| ENSG00000007908 | 57.38156525 | 0           | 8.175940582  | 3.07E-08 | 2.56E-07 | SELE       |
| ENSG00000111530 | 1500.48323  | 3062.942409 | -1.029472471 | 3.14E-08 | 2.61E-07 | CAND1      |
| ENSG00000138442 | 333.912993  | 1048.736    | -1.651496563 | 3.14E-08 | 2.61E-07 | WDR12      |
| ENSG00000100147 | 20.21907289 | 105.6974926 | -2.385850322 | 3.19E-08 | 2.66E-07 | CCDC134    |
| ENSG00000075420 | 1206.76171  | 3458.419401 | -1.519003456 | 3.21E-08 | 2.67E-07 | FNDC3B     |
| ENSG00000167460 | 10772.10161 | 28442.20601 | -1.400730862 | 3.23E-08 | 2.69E-07 | TPM4       |
| ENSG00000115183 | 2375.724328 | 529.2307644 | 2.166639803  | 3.25E-08 | 2.70E-07 | TANC1      |
| ENSG00000198018 | 166.337192  | 437.9863834 | -1.397162746 | 3.25E-08 | 2.70E-07 | ENTPD7     |
| ENSG00000152402 | 47.35690007 | 5.064677702 | 3.231690031  | 3.26E-08 | 2.71E-07 | GUCY1A2    |
| ENSG00000113391 | 918.6481124 | 361.307635  | 1.345932464  | 3.27E-08 | 2.72E-07 | FAM172A    |
| ENSG00000027697 | 2449.801419 | 1070.176511 | 1.194964654  | 3.31E-08 | 2.75E-07 | IFNGR1     |
| ENSG00000107560 | 788.9447978 | 333.838591  | 1.240785676  | 3.31E-08 | 2.75E-07 | RAB11FIP2  |
| ENSG00000049541 | 332.4412478 | 810.8629471 | -1.286504823 | 3.35E-08 | 2.78E-07 | RFC2       |
| ENSG00000182179 | 2275.571403 | 827.8974893 | 1.458410635  | 3.36E-08 | 2.79E-07 | UBA7       |
| ENSG00000213553 | 583.1743607 | 1846.331235 | -1.662885943 | 3.37E-08 | 2.80E-07 | RPLP0P6    |
| ENSG00000168273 | 97.90044381 | 249.3052434 | -1.348697167 | 3.38E-08 | 2.80E-07 | SMIM4      |
| ENSG00000138674 | 2517.435455 | 6440.200975 | -1.35517343  | 3.42E-08 | 2.83E-07 | SEC31A     |
| ENSG00000196295 | 1136.979783 | 346.4552432 | 1.714758993  | 3.42E-08 | 2.83E-07 | GARS-DT    |
| ENSG00000116741 | 628.7014399 | 99.2341768  | 2.661311099  | 3.43E-08 | 2.84E-07 | RGS2       |
| ENSG00000136297 | 37.78429038 | 0           | 7.572866183  | 3.46E-08 | 2.87E-07 | MMD2       |
| ENSG00000176472 | 115.581824  | 30.78718356 | 1.907731208  | 3.49E-08 | 2.89E-07 | ZNF575     |
| ENSG00000169083 | 45.82299845 | 260.1008602 | -2.506626278 | 3.49E-08 | 2.89E-07 | AR         |
| ENSG00000186575 | 274.0056739 | 1007.665971 | -1.878716136 | 3.53E-08 | 2.92E-07 | NF2        |
| ENSG00000130725 | 1142.953664 | 2481.086654 | -1.118074274 | 3.54E-08 | 2.93E-07 | UBE2M      |
| ENSG00000077235 | 1267.020696 | 2559.816735 | -1.01451056  | 3.54E-08 | 2.93E-07 | GTF3C1     |
| ENSG00000124256 | 50.54028099 | 0           | 7.992538801  | 3.56E-08 | 2.95E-07 | ZBP1       |
| ENSG00000149489 | 217.0903378 | 70.13464265 | 1.630532453  | 3.58E-08 | 2.96E-07 | ROM1       |
| ENSG00000197376 | 35.78383077 | 0           | 7.495688858  | 3.59E-08 | 2.96E-07 | AC089987.1 |
| ENSG00000146433 | 823.441127  | 1624.363139 | -0.980022529 | 3.60E-08 | 2.97E-07 | TMEM181    |
| ENSG00000137996 | 534.1654031 | 1266.435884 | -1.245698892 | 3.61E-08 | 2.98E-07 | RTCA       |
| ENSG00000279875 | 44.82436456 | 0           | 7.820352938  | 3.62E-08 | 2.99E-07 | AC074029.4 |
| ENSG00000180113 | 82.90719511 | 3.067083173 | 4.804042508  | 3.62E-08 | 2.99E-07 | TDRD6      |
| ENSG00000111404 | 46.82364144 | 0           | 7.882300069  | 3.68E-08 | 3.03E-07 | RERGL      |
| ENSG00000130826 | 563.3779131 | 1552.495387 | -1.462597483 | 3.73E-08 | 3.08E-07 | DKC1       |
| ENSG00000121742 | 1035.168375 | 0           | 12.34934098  | 3.75E-08 | 3.09E-07 | GJB6       |
| ENSG00000249249 | 58.63462067 | 5.330327845 | 3.4526918    | 3.75E-08 | 3.09E-07 | AC010226.1 |
| ENSG00000162241 | 211.2934314 | 46.56198336 | 2.183280088  | 3.75E-08 | 3.09E-07 | SLC25A45   |
| ENSG00000020426 | 224.5485477 | 531.7369532 | -1.244168332 | 3.75E-08 | 3.09E-07 | MNAT1      |
| ENSG00000135480 | 2.14337627  | 2497.00532  | -10.18863784 | 3.76E-08 | 3.10E-07 | KRT7       |
| ENSG00000144668 | 129.4179357 | 9.680771646 | 3.740013765  | 3.80E-08 | 3.13E-07 | ITGA9      |
| ENSG00000183773 | 52.57889205 | 2.894762044 | 4.190562167  | 3.80E-08 | 3.13E-07 | AIFM3      |
| ENSG00000102796 | 193.301959  | 33.59922907 | 2.526594308  | 3.82E-08 | 3.14E-07 | DHRS12     |
| ENSG00000131876 | 493.1595532 | 1258.913402 | -1.352077429 | 3.83E-08 | 3.15E-07 | SNRPA1     |
| ENSG00000170545 | 56.28181238 | 421.2231896 | -2.904900817 | 3.86E-08 | 3.17E-07 | SMAGP      |
| ENSG00000174175 | 41.6402991  | 0           | 7.713366876  | 3.86E-08 | 3.17E-07 | SELP       |

|                 |             |             |              |          |          |            |
|-----------------|-------------|-------------|--------------|----------|----------|------------|
| ENSG00000238142 | 120.1653927 | 17.27537164 | 2.799347637  | 3.89E-08 | 3.20E-07 | BX284668.5 |
| ENSG00000187037 | 34.09021651 | 0           | 7.424414599  | 3.90E-08 | 3.20E-07 | GPR141     |
| ENSG00000167840 | 197.5040329 | 58.71961487 | 1.751629446  | 3.91E-08 | 3.21E-07 | ZNF232     |
| novel.405       | 108.5149953 | 1.060160428 | 6.663429298  | 3.93E-08 | 3.22E-07 | -          |
| ENSG00000076043 | 646.7791033 | 1611.414492 | -1.317059411 | 3.96E-08 | 3.25E-07 | REXO2      |
| ENSG00000055163 | 767.6161108 | 161.8948908 | 2.243881573  | 3.96E-08 | 3.25E-07 | CYFIP2     |
| ENSG00000109917 | 545.4469563 | 1311.645764 | -1.26561995  | 4.00E-08 | 3.28E-07 | ZPR1       |
| ENSG00000164088 | 882.0917597 | 382.3639857 | 1.205763735  | 4.01E-08 | 3.28E-07 | PPM1M      |
| ENSG00000220008 | 59.2912636  | 1.793307549 | 5.045470832  | 4.03E-08 | 3.31E-07 | LINGO3     |
| ENSG00000138080 | 1509.564171 | 8099.538749 | -2.423747292 | 4.13E-08 | 3.38E-07 | EMILIN1    |
| ENSG00000237149 | 139.3115098 | 41.68280781 | 1.737402634  | 4.14E-08 | 3.39E-07 | ZNF503-AS2 |
| ENSG00000254838 | 99.58767511 | 9.487097151 | 3.399712647  | 4.15E-08 | 3.40E-07 | GVINP1     |
| ENSG00000151929 | 597.1718948 | 2158.402534 | -1.853962796 | 4.16E-08 | 3.40E-07 | BAG3       |
| ENSG00000164303 | 158.9223457 | 0.713078025 | 7.792383889  | 4.16E-08 | 3.40E-07 | ENPP6      |
| ENSG00000132465 | 170.1787532 | 0.356539013 | 8.782701266  | 4.16E-08 | 3.40E-07 | JCHAIN     |
| ENSG00000213551 | 209.1780352 | 634.9495548 | -1.602380137 | 4.17E-08 | 3.41E-07 | DNAJC9     |
| ENSG00000143653 | 3080.573145 | 1011.869442 | 1.605891321  | 4.17E-08 | 3.41E-07 | SCCPDH     |
| ENSG00000100983 | 673.2856883 | 1682.566202 | -1.321415467 | 4.19E-08 | 3.42E-07 | GSS        |
| ENSG00000109686 | 4663.242252 | 1250.615098 | 1.898460128  | 4.22E-08 | 3.45E-07 | SH3D19     |
| ENSG00000128165 | 6.398645048 | 137.2219801 | -4.425749753 | 4.23E-08 | 3.46E-07 | ADM2       |
| ENSG00000174996 | 425.416061  | 1060.212717 | -1.317098146 | 4.23E-08 | 3.46E-07 | KLC2       |
| ENSG00000185666 | 50.78502863 | 1.00940975  | 5.57697744   | 4.25E-08 | 3.47E-07 | SYN3       |
| ENSG00000234420 | 925.9513406 | 298.5756688 | 1.633100288  | 4.27E-08 | 3.48E-07 | ZNF37BP    |
| ENSG00000138449 | 1157.90479  | 70.15411663 | 4.043231384  | 4.28E-08 | 3.49E-07 | SLC40A1    |
| ENSG00000156968 | 58.44313953 | 2.527610546 | 4.537689468  | 4.29E-08 | 3.50E-07 | MPV17L     |
| ENSG00000165917 | 68.04976811 | 5.411760104 | 3.655684347  | 4.30E-08 | 3.51E-07 | RAPSN      |
| ENSG00000073905 | 39.72859235 | 139.5408901 | -1.813123741 | 4.39E-08 | 3.57E-07 | VDAC1P1    |
| ENSG00000149177 | 2880.26772  | 765.1454405 | 1.912229084  | 4.39E-08 | 3.57E-07 | PTPRJ      |
| ENSG00000179598 | 187.4897094 | 44.5656731  | 2.073135393  | 4.39E-08 | 3.58E-07 | PLD6       |
| ENSG00000005448 | 253.7311551 | 948.9867616 | -1.902583909 | 4.41E-08 | 3.59E-07 | WDR54      |
| ENSG00000167004 | 4645.694103 | 14259.89888 | -1.617986716 | 4.42E-08 | 3.59E-07 | PDIA3      |
| ENSG00000077232 | 2136.508799 | 4268.961885 | -0.998572914 | 4.42E-08 | 3.59E-07 | DNAJC10    |
| ENSG00000101871 | 1431.151877 | 401.5813677 | 1.832956494  | 4.46E-08 | 3.63E-07 | MID1       |
| ENSG00000160256 | 211.8276592 | 1009.858131 | -2.253520526 | 4.46E-08 | 3.63E-07 | FAM207A    |
| ENSG00000230897 | 1231.681241 | 3039.864434 | -1.303417269 | 4.47E-08 | 3.63E-07 | RPS18P12   |
| ENSG00000256269 | 279.2587499 | 772.2010137 | -1.467765284 | 4.47E-08 | 3.64E-07 | HMBS       |
| ENSG00000164181 | 249.2653564 | 13.9295857  | 4.166488158  | 4.52E-08 | 3.68E-07 | ELOVL7     |
| ENSG00000148834 | 1142.224636 | 3710.706635 | -1.699752022 | 4.53E-08 | 3.68E-07 | GSTO1      |
| ENSG00000123570 | 67.95886431 | 8.692586867 | 2.972712888  | 4.56E-08 | 3.70E-07 | RAB9B      |
| ENSG00000232977 | 91.2394722  | 11.57802069 | 2.966643576  | 4.57E-08 | 3.71E-07 | LINC00327  |
| ENSG00000143434 | 489.0591797 | 129.1199889 | 1.921759682  | 4.60E-08 | 3.73E-07 | SEMA6C     |
| ENSG00000179195 | 2842.689606 | 1110.493673 | 1.356055992  | 4.67E-08 | 3.79E-07 | ZNF664     |
| ENSG00000171951 | 146.8718632 | 14.3901946  | 3.342972774  | 4.71E-08 | 3.82E-07 | SCG2       |
| ENSG00000039123 | 707.8110079 | 1563.236328 | -1.14323924  | 4.72E-08 | 3.83E-07 | MTREX      |
| ENSG00000196781 | 2864.826614 | 667.3654738 | 2.102312222  | 4.73E-08 | 3.83E-07 | TLE1       |
| ENSG00000112425 | 314.0197718 | 83.98523624 | 1.902914745  | 4.76E-08 | 3.86E-07 | EPM2A      |
| ENSG00000118564 | 2105.194611 | 1110.409801 | 0.922868408  | 4.79E-08 | 3.88E-07 | FBXL5      |
| ENSG00000261308 | 60.41175938 | 0.356539013 | 7.289239968  | 4.85E-08 | 3.93E-07 | FIGNL2     |
| ENSG00000167601 | 1954.114734 | 4864.27206  | -1.3156224   | 4.86E-08 | 3.94E-07 | AXL        |
| ENSG00000196126 | 53.50338994 | 0           | 8.075362432  | 4.88E-08 | 3.95E-07 | HLA-DRB1   |
| ENSG00000174944 | 359.9280566 | 0           | 10.82524481  | 4.92E-08 | 3.98E-07 | P2RY14     |

|                 |             |             |              |          |          |            |
|-----------------|-------------|-------------|--------------|----------|----------|------------|
| ENSG00000124491 | 1208.479079 | 0           | 12.572647    | 4.96E-08 | 4.01E-07 | F13A1      |
| ENSG00000103175 | 79.6077227  | 3.52640781  | 4.484100749  | 4.97E-08 | 4.02E-07 | WFDC1      |
| ENSG00000114812 | 54.76002033 | 0.743759607 | 6.246946142  | 4.99E-08 | 4.03E-07 | VIPR1      |
| ENSG00000165113 | 86.63637115 | 15.23661144 | 2.499777909  | 5.03E-08 | 4.06E-07 | GKAP1      |
| ENSG00000064545 | 435.8466814 | 857.2398819 | -0.975724739 | 5.03E-08 | 4.06E-07 | TMEM161A   |
| ENSG00000197013 | 275.8579881 | 99.03043775 | 1.479880032  | 5.06E-08 | 4.08E-07 | ZNF429     |
| ENSG00000142453 | 551.8557445 | 1302.067054 | -1.238423388 | 5.06E-08 | 4.09E-07 | CARM1      |
| ENSG00000146067 | 1710.274548 | 677.6927202 | 1.33562981   | 5.10E-08 | 4.12E-07 | FAM193B    |
| ENSG00000115009 | 7.083410244 | 5661.071308 | -9.643721643 | 5.12E-08 | 4.13E-07 | CCL20      |
| ENSG00000257621 | 1259.910136 | 445.2182458 | 1.500648858  | 5.14E-08 | 4.14E-07 | PSMA3-AS1  |
| ENSG00000108622 | 69.95019203 | 2.038888596 | 5.053243336  | 5.16E-08 | 4.16E-07 | ICAM2      |
| ENSG00000165775 | 1570.427055 | 699.6859099 | 1.166273304  | 5.21E-08 | 4.20E-07 | FUNDC2     |
| ENSG00000257226 | 50.38673784 | 0           | 7.989417976  | 5.27E-08 | 4.24E-07 | AC079584.2 |
| ENSG00000170027 | 2616.211963 | 5691.250097 | -1.121329981 | 5.29E-08 | 4.26E-07 | YWHAG      |
| ENSG00000174718 | 703.547603  | 204.9793248 | 1.779402948  | 5.32E-08 | 4.28E-07 | RESF1      |
| ENSG00000134245 | 247.7261144 | 70.51967989 | 1.812248691  | 5.33E-08 | 4.29E-07 | WNT2B      |
| ENSG00000157227 | 7218.250598 | 62409.48861 | -3.112046708 | 5.35E-08 | 4.30E-07 | MMP14      |
| ENSG00000171617 | 241.3321832 | 807.479788  | -1.742863861 | 5.35E-08 | 4.31E-07 | ENC1       |
| ENSG00000101680 | 120.5599935 | 1420.768864 | -3.559347299 | 5.37E-08 | 4.31E-07 | LAMA1      |
| ENSG00000153721 | 1486.959041 | 202.0305329 | 2.878732404  | 5.38E-08 | 4.33E-07 | CNKSR3     |
| ENSG00000171643 | 30.23872383 | 0           | 7.252242939  | 5.40E-08 | 4.34E-07 | S100Z      |
| ENSG00000132514 | 63.51880922 | 0           | 8.322459559  | 5.42E-08 | 4.35E-07 | CLEC10A    |
| ENSG00000179564 | 55.49045886 | 3.189937893 | 4.110874226  | 5.49E-08 | 4.41E-07 | LSMEM2     |
| ENSG00000142669 | 1623.717847 | 5537.510048 | -1.769910764 | 5.53E-08 | 4.44E-07 | SH3BGR13   |
| ENSG00000130529 | 246.9102841 | 1005.881338 | -2.02651967  | 5.54E-08 | 4.45E-07 | TRPM4      |
| ENSG00000134324 | 2256.288786 | 526.7228034 | 2.098846978  | 5.56E-08 | 4.46E-07 | LPIN1      |
| ENSG00000185559 | 77.380038   | 0           | 8.607578294  | 5.57E-08 | 4.47E-07 | DLK1       |
| ENSG00000007312 | 42.6548035  | 0           | 7.74797647   | 5.61E-08 | 4.50E-07 | CD79B      |
| ENSG00000136758 | 1785.447138 | 3967.267698 | -1.151934986 | 5.62E-08 | 4.51E-07 | YME1L1     |
| ENSG00000168785 | 745.6095744 | 1566.699365 | -1.071114118 | 5.66E-08 | 4.54E-07 | TSPAN5     |
| ENSG00000248019 | 174.2563484 | 26.3752482  | 2.726416949  | 5.69E-08 | 4.56E-07 | FAM13A-AS1 |
| ENSG00000167100 | 29.92298823 | 346.1009223 | -3.532612261 | 5.69E-08 | 4.56E-07 | SAMD14     |
| ENSG00000121060 | 945.5855234 | 2222.424265 | -1.232868748 | 5.72E-08 | 4.58E-07 | TRIM25     |
| ENSG00000137713 | 331.5773245 | 907.6790111 | -1.452941343 | 5.73E-08 | 4.59E-07 | PPP2R1B    |
| ENSG00000173530 | 418.677432  | 2189.55267  | -2.386676049 | 5.74E-08 | 4.59E-07 | TNFRSF10D  |
| ENSG00000135144 | 191.5029082 | 6.298315133 | 4.938050665  | 5.74E-08 | 4.59E-07 | DTX1       |
| ENSG00000164106 | 102.2792401 | 1.080229524 | 6.567933389  | 5.78E-08 | 4.62E-07 | SCRG1      |
| ENSG00000133816 | 279.2355967 | 5893.261229 | -4.399656666 | 5.85E-08 | 4.68E-07 | MICAL2     |
| ENSG00000186642 | 112.5542798 | 6.520359459 | 4.113303139  | 5.89E-08 | 4.70E-07 | PDE2A      |
| ENSG00000158560 | 142.5579577 | 6.960770875 | 4.342829111  | 5.92E-08 | 4.73E-07 | DYNC111    |
| ENSG00000263535 | 5.803387812 | 63.992      | -3.467001693 | 5.93E-08 | 4.73E-07 | AK4P1      |
| ENSG00000054654 | 1263.0947   | 356.7251763 | 1.823641545  | 5.95E-08 | 4.75E-07 | SYNE2      |
| ENSG00000132388 | 461.3570095 | 1213.499651 | -1.395264558 | 5.95E-08 | 4.75E-07 | UBE2G1     |
| ENSG00000234616 | 442.3580412 | 1035.261556 | -1.22674228  | 5.98E-08 | 4.77E-07 | JRK        |
| ENSG00000260135 | 38.00048848 | 0           | 7.581356333  | 6.01E-08 | 4.79E-07 | MMP2-AS1   |
| ENSG00000105640 | 7528.935185 | 17443.11549 | -1.212145197 | 6.07E-08 | 4.84E-07 | RPL18A     |
| ENSG00000130787 | 135.9113888 | 484.0306674 | -1.832510288 | 6.09E-08 | 4.85E-07 | HIP1R      |
| ENSG00000264985 | 35.12177379 | 0           | 7.46885712   | 6.09E-08 | 4.85E-07 | AC124804.1 |
| ENSG00000137809 | 150.1405628 | 4029.581429 | -4.746486359 | 6.12E-08 | 4.87E-07 | ITGA11     |
| ENSG00000279453 | 465.3081982 | 123.2247726 | 1.919123524  | 6.20E-08 | 4.94E-07 | Z99129.4   |
| ENSG00000143537 | 1154.898143 | 2856.160783 | -1.306355233 | 6.27E-08 | 4.99E-07 | ADAM15     |



|                 |             |             |              |          |          |            |
|-----------------|-------------|-------------|--------------|----------|----------|------------|
| ENSG00000185736 | 82.60356837 | 0.336469917 | 7.739857926  | 6.28E-08 | 5.00E-07 | ADARB2     |
| ENSG00000152061 | 1027.384772 | 327.5365987 | 1.649120294  | 6.41E-08 | 5.10E-07 | RABGAP1L   |
| ENSG00000167962 | 478.6142865 | 1205.303748 | -1.332225202 | 6.42E-08 | 5.11E-07 | ZNF598     |
| ENSG00000048828 | 1937.677844 | 3687.998206 | -0.928544797 | 6.42E-08 | 5.11E-07 | FAM120A    |
| ENSG00000178467 | 1431.229274 | 513.6920678 | 1.478097382  | 6.43E-08 | 5.11E-07 | P4HTM      |
| ENSG00000132467 | 542.3163274 | 1246.339396 | -1.20076866  | 6.46E-08 | 5.13E-07 | UTP3       |
| novel.761       | 41.57690466 | 0           | 7.712243557  | 6.48E-08 | 5.15E-07 | -          |
| ENSG00000260077 | 135.7414331 | 20.44524044 | 2.730717734  | 6.49E-08 | 5.16E-07 | AC104794.2 |
| ENSG00000198856 | 924.8604565 | 3528.958753 | -1.932063877 | 6.50E-08 | 5.16E-07 | OSTC       |
| ENSG00000119729 | 3667.208398 | 1732.192195 | 1.082265302  | 6.52E-08 | 5.17E-07 | RHOQ       |
| ENSG00000206195 | 54.53991838 | 0           | 8.10253094   | 6.53E-08 | 5.18E-07 | DUXAP8     |
| ENSG00000182197 | 656.6340979 | 2268.761084 | -1.788687752 | 6.53E-08 | 5.18E-07 | EXT1       |
| ENSG00000136367 | 129.810501  | 17.76550626 | 2.857773136  | 6.54E-08 | 5.18E-07 | ZFHX2      |
| ENSG00000153790 | 126.6678775 | 37.29795801 | 1.768036241  | 6.54E-08 | 5.18E-07 | C7orf31    |
| ENSG00000102805 | 411.7754473 | 120.4182494 | 1.772818699  | 6.59E-08 | 5.22E-07 | CLN5       |
| ENSG00000134851 | 1311.83751  | 3154.512426 | -1.265711398 | 6.60E-08 | 5.23E-07 | TMEM165    |
| ENSG00000168661 | 158.2743799 | 50.59731061 | 1.645533157  | 6.61E-08 | 5.24E-07 | ZNF30      |
| ENSG00000244041 | 70.17899824 | 12.96275428 | 2.438297299  | 6.63E-08 | 5.25E-07 | LINC01011  |
| ENSG00000100991 | 1585.339328 | 3125.689124 | -0.979336272 | 6.63E-08 | 5.25E-07 | TRPC4AP    |
| ENSG00000129472 | 671.1280522 | 335.253925  | 1.001378146  | 6.64E-08 | 5.25E-07 | RAB2B      |
| ENSG00000162461 | 107.0056691 | 15.41021684 | 2.784864219  | 6.65E-08 | 5.26E-07 | SLC25A34   |
| ENSG00000171243 | 105.7970188 | 0.774441189 | 7.174075173  | 6.65E-08 | 5.26E-07 | SOSTDC1    |
| ENSG00000177842 | 117.4947848 | 16.11383825 | 2.85636877   | 6.67E-08 | 5.27E-07 | ZNF620     |
| ENSG00000161509 | 172.5249257 | 5.421216714 | 4.995026313  | 6.69E-08 | 5.29E-07 | GRIN2C     |
| ENSG00000111252 | 1164.459126 | 5305.985647 | -2.187921586 | 6.71E-08 | 5.30E-07 | SH2B3      |
| ENSG00000198523 | 75.60876844 | 1.060160428 | 6.140487336  | 6.73E-08 | 5.32E-07 | PLN        |
| ENSG00000142173 | 10476.62797 | 117857.4646 | -3.49179959  | 6.78E-08 | 5.36E-07 | COL6A2     |
| ENSG00000167447 | 196.2398371 | 467.9956241 | -1.254410459 | 6.79E-08 | 5.36E-07 | SMG8       |
| ENSG00000110448 | 54.29467254 | 0           | 8.095987312  | 6.82E-08 | 5.38E-07 | CD5        |
| ENSG00000168995 | 42.74047925 | 0           | 7.75076728   | 6.82E-08 | 5.38E-07 | SIGLEC7    |
| ENSG00000113194 | 769.6204349 | 1706.931197 | -1.149004392 | 6.85E-08 | 5.40E-07 | FAF2       |
| ENSG00000135773 | 51.7959859  | 1.518200796 | 5.150851603  | 6.90E-08 | 5.44E-07 | CAPN9      |
| ENSG00000184164 | 789.5772803 | 2751.12645  | -1.800718761 | 6.96E-08 | 5.49E-07 | CRELD2     |
| ENSG00000115339 | 107.5798994 | 12.5649212  | 3.098264004  | 6.98E-08 | 5.50E-07 | GALNT3     |
| ENSG00000182117 | 697.1612107 | 1713.880671 | -1.297852486 | 6.99E-08 | 5.50E-07 | NOP10      |
| ENSG00000224411 | 26.08041363 | 101.1451548 | -1.956984426 | 6.99E-08 | 5.51E-07 | HSP90AA2P  |
| ENSG00000070371 | 165.4456172 | 406.0902625 | -1.295155751 | 7.02E-08 | 5.53E-07 | CLTCL1     |
| ENSG00000198939 | 82.3226509  | 14.15638192 | 2.531873737  | 7.06E-08 | 5.56E-07 | ZFP2       |
| ENSG00000124120 | 263.3565609 | 812.3517371 | -1.624948715 | 7.07E-08 | 5.56E-07 | TTPAL      |
| ENSG00000146416 | 821.5599347 | 394.329227  | 1.058595958  | 7.12E-08 | 5.60E-07 | AIG1       |
| ENSG00000226752 | 745.8267961 | 244.8576647 | 1.605881152  | 7.13E-08 | 5.60E-07 | CUTALP     |
| ENSG00000155980 | 631.8796265 | 49.39739002 | 3.680276631  | 7.13E-08 | 5.61E-07 | KIF5A      |
| ENSG00000196155 | 795.4364582 | 230.1152506 | 1.789286581  | 7.14E-08 | 5.61E-07 | PLEKHG4    |
| ENSG00000076351 | 199.5720035 | 45.57636712 | 2.128047199  | 7.14E-08 | 5.61E-07 | SLC46A1    |
| ENSG00000184995 | 0.307102255 | 57.25430093 | -7.457162777 | 7.19E-08 | 5.64E-07 | IFNE       |
| ENSG00000267078 | 49.19740575 | 0           | 7.954946072  | 7.22E-08 | 5.67E-07 | AC015802.1 |
| ENSG00000136240 | 2730.2731   | 8009.210619 | -1.55263847  | 7.24E-08 | 5.69E-07 | KDELR2     |
| ENSG00000269918 | 59.07309984 | 5.493192363 | 3.4420543    | 7.28E-08 | 5.71E-07 | AF131215.6 |
| ENSG00000161692 | 149.5684577 | 445.7499785 | -1.57531122  | 7.32E-08 | 5.74E-07 | DBF4B      |
| novel.255       | 0           | 31.29024241 | -7.551171501 | 7.36E-08 | 5.78E-07 | -          |
| ENSG00000189157 | 43.380726   | 1.447381022 | 4.915773104  | 7.38E-08 | 5.79E-07 | FAM47E     |

|                 |             |             |              |          |          |            |
|-----------------|-------------|-------------|--------------|----------|----------|------------|
| ENSG00000122971 | 469.9138337 | 165.3683649 | 1.506724032  | 7.40E-08 | 5.80E-07 | ACADS      |
| ENSG00000180801 | 81.38855074 | 691.910991  | -3.088559274 | 7.43E-08 | 5.82E-07 | ARSJ       |
| ENSG00000162909 | 4235.557098 | 9240.765518 | -1.125454433 | 7.44E-08 | 5.83E-07 | CAPN2      |
| ENSG00000168028 | 8958.56841  | 22799.2306  | -1.347659903 | 7.48E-08 | 5.86E-07 | RPSA       |
| ENSG00000159202 | 1595.406916 | 3173.315364 | -0.992107456 | 7.48E-08 | 5.86E-07 | UBE2Z      |
| ENSG00000258867 | 31.65485304 | 0           | 7.317474605  | 7.50E-08 | 5.87E-07 | LINC01146  |
| ENSG00000100298 | 82.32319253 | 0.713078025 | 6.843147407  | 7.51E-08 | 5.88E-07 | APOBEC3H   |
| ENSG00000144580 | 641.5732391 | 1238.621929 | -0.948986106 | 7.53E-08 | 5.89E-07 | CNOT9      |
| ENSG00000147138 | 72.83030291 | 0           | 8.519882224  | 7.54E-08 | 5.90E-07 | GPR174     |
| ENSG00000074219 | 216.733374  | 722.5679876 | -1.737495401 | 7.57E-08 | 5.92E-07 | TEAD2      |
| ENSG00000080819 | 369.971659  | 937.8799617 | -1.341732234 | 7.65E-08 | 5.97E-07 | CPOX       |
| ENSG00000256751 | 65.49488003 | 1.049547942 | 5.935427085  | 7.69E-08 | 6.00E-07 | PLBD1-AS1  |
| ENSG00000232628 | 59.83691618 | 1.813376645 | 5.053132749  | 7.69E-08 | 6.00E-07 | AC092809.2 |
| novel.123       | 2.125753916 | 69.78481614 | -5.037667228 | 7.70E-08 | 6.01E-07 | -          |
| ENSG00000102225 | 1258.523038 | 2920.327947 | -1.214253209 | 7.75E-08 | 6.05E-07 | CDK16      |
| ENSG00000180574 | 29.11744512 | 110.9130097 | -1.930193502 | 7.75E-08 | 6.05E-07 | EIF2S3B    |
| ENSG00000175315 | 52.14034161 | 3.882946823 | 3.73375951   | 7.77E-08 | 6.06E-07 | CST6       |
| ENSG00000100592 | 845.7508394 | 241.9203587 | 1.806501949  | 7.81E-08 | 6.09E-07 | DAAM1      |
| ENSG00000237807 | 235.2356693 | 66.26384937 | 1.824401483  | 7.81E-08 | 6.09E-07 | AC022034.1 |
| ENSG00000237238 | 778.3091223 | 38.47352433 | 4.34172599   | 7.83E-08 | 6.10E-07 | BMS1P10    |
| ENSG00000117616 | 2242.766861 | 1228.956346 | 0.867863867  | 7.84E-08 | 6.11E-07 | RSRP1      |
| ENSG00000138735 | 1424.393861 | 236.5106188 | 2.589626434  | 7.87E-08 | 6.13E-07 | PDE5A      |
| ENSG00000250934 | 51.19263695 | 1.885352294 | 4.81248238   | 7.90E-08 | 6.15E-07 | AC016924.1 |
| ENSG00000172465 | 531.5044965 | 218.0145343 | 1.284400588  | 7.96E-08 | 6.20E-07 | TCEAL1     |
| ENSG00000160211 | 549.0566345 | 2082.006529 | -1.923145922 | 8.04E-08 | 6.26E-07 | G6PD       |
| ENSG00000244300 | 112.6941913 | 6.176873076 | 4.167642322  | 8.07E-08 | 6.28E-07 | GATA2-AS1  |
| ENSG00000204118 | 29.29603377 | 0           | 7.206716377  | 8.09E-08 | 6.29E-07 | NAP1L6     |
| ENSG00000010932 | 94.67238629 | 0           | 8.898397825  | 8.12E-08 | 6.31E-07 | FMO1       |
| novel.860       | 1229.789102 | 166.2224274 | 2.888231214  | 8.19E-08 | 6.36E-07 | -          |
| ENSG00000035499 | 33.21948332 | 282.4908083 | -3.089277147 | 8.19E-08 | 6.36E-07 | DEPDC1B    |
| ENSG00000117594 | 5.238289417 | 124.1924216 | -4.574690622 | 8.27E-08 | 6.43E-07 | HSD11B1    |
| ENSG00000224594 | 10.29519816 | 99.18932107 | -3.266699289 | 8.34E-08 | 6.47E-07 | RPL29P19   |
| ENSG00000134138 | 115.5378035 | 393.3463889 | -1.767645889 | 8.34E-08 | 6.48E-07 | MEIS2      |
| ENSG00000119917 | 3338.075731 | 1152.950023 | 1.533655794  | 8.40E-08 | 6.52E-07 | IFIT3      |
| ENSG00000163347 | 874.5025554 | 172.1694818 | 2.343462969  | 8.50E-08 | 6.59E-07 | CLDN1      |
| ENSG00000050767 | 34.15694498 | 0           | 7.42715952   | 8.50E-08 | 6.59E-07 | COL23A1    |
| ENSG00000141367 | 4269.528031 | 9654.682679 | -1.177163807 | 8.51E-08 | 6.60E-07 | CLTC       |
| ENSG00000143194 | 32.96474958 | 0           | 7.376704     | 8.55E-08 | 6.63E-07 | MAEL       |
| ENSG00000180539 | 43.94485548 | 4.677457107 | 3.233948931  | 8.56E-08 | 6.64E-07 | C9orf139   |
| ENSG00000274712 | 182.9684241 | 30.21317654 | 2.605629985  | 8.59E-08 | 6.66E-07 | AC005332.4 |
| novel.503       | 225.6732313 | 552.1962741 | -1.290705186 | 8.60E-08 | 6.66E-07 | -          |
| ENSG00000138795 | 234.4995598 | 23.8854641  | 3.296926475  | 8.64E-08 | 6.69E-07 | LEF1       |
| ENSG00000183049 | 833.4617451 | 112.4546657 | 2.887773142  | 8.64E-08 | 6.69E-07 | CAMK1D     |
| ENSG00000140285 | 1401.307194 | 3562.121882 | -1.34593798  | 8.65E-08 | 6.69E-07 | FGF7       |
| ENSG00000260317 | 48.52198556 | 3.586615098 | 3.757527419  | 8.66E-08 | 6.69E-07 | AC009812.4 |
| ENSG00000186654 | 238.7701296 | 36.43763664 | 2.706693131  | 8.68E-08 | 6.71E-07 | PRR5       |
| ENSG00000163694 | 243.1370448 | 29.38567293 | 3.053262231  | 8.79E-08 | 6.79E-07 | RBM47      |
| ENSG00000113580 | 2533.211808 | 891.5751174 | 1.506540379  | 8.79E-08 | 6.79E-07 | NR3C1      |
| ENSG00000177707 | 368.1986528 | 1323.565143 | -1.84550756  | 8.81E-08 | 6.81E-07 | NECTIN3    |
| ENSG00000216285 | 38.70044001 | 178.1950363 | -2.203986873 | 8.87E-08 | 6.85E-07 | AC078819.1 |
| ENSG00000172432 | 872.8757867 | 2091.090357 | -1.260228048 | 8.89E-08 | 6.86E-07 | GTPBP2     |

|                 |             |             |              |          |          |            |
|-----------------|-------------|-------------|--------------|----------|----------|------------|
| ENSG00000272391 | 673.6705457 | 1310.615784 | -0.960185939 | 8.89E-08 | 6.86E-07 | POM121C    |
| ENSG00000145040 | 8.437540845 | 145.9486565 | -4.109871617 | 8.90E-08 | 6.87E-07 | UCN2       |
| ENSG00000088247 | 2463.542156 | 4644.508123 | -0.91480642  | 8.95E-08 | 6.90E-07 | KHSRP      |
| ENSG00000143374 | 422.876102  | 841.2365821 | -0.992472091 | 8.96E-08 | 6.91E-07 | TARS2      |
| ENSG00000273156 | 70.82118247 | 7.592288247 | 3.227117598  | 8.97E-08 | 6.91E-07 | AC124016.2 |
| ENSG00000164112 | 484.8120631 | 15.69837622 | 4.940917469  | 8.98E-08 | 6.92E-07 | TMEM155    |
| ENSG00000082781 | 1570.420733 | 9943.732565 | -2.662690483 | 9.00E-08 | 6.93E-07 | ITGB5      |
| ENSG00000215915 | 62.62519779 | 0.336469917 | 7.341202976  | 9.02E-08 | 6.94E-07 | ATAD3C     |
| ENSG00000213139 | 130.9918839 | 39.01111757 | 1.746688582  | 9.05E-08 | 6.97E-07 | CRYGS      |
| ENSG00000173085 | 162.9892977 | 506.8113634 | -1.637029699 | 9.07E-08 | 6.98E-07 | COQ2       |
| ENSG00000278989 | 82.57868173 | 4.809640044 | 4.120912163  | 9.21E-08 | 7.08E-07 | AP001148.1 |
| ENSG00000136937 | 681.7735465 | 1395.109344 | -1.033224344 | 9.23E-08 | 7.10E-07 | NCBP1      |
| ENSG00000095015 | 687.2396569 | 103.7761117 | 2.725156909  | 9.26E-08 | 7.12E-07 | MAP3K1     |
| ENSG00000139970 | 191.1244613 | 11.09991123 | 4.09542845   | 9.27E-08 | 7.13E-07 | RTN1       |
| ENSG00000113211 | 62.68759584 | 0           | 8.30436877   | 9.28E-08 | 7.13E-07 | PCDHB6     |
| ENSG00000242147 | 0           | 48.57322564 | -8.181433386 | 9.37E-08 | 7.20E-07 | LINC02657  |
| ENSG00000207736 | 57.37666572 | 0           | 8.176723432  | 9.42E-08 | 7.23E-07 | MIR657     |
| ENSG00000066735 | 61.64833068 | 2.058957692 | 4.864152102  | 9.42E-08 | 7.23E-07 | KIF26A     |
| ENSG00000129657 | 1872.310605 | 4556.062892 | -1.283016861 | 9.42E-08 | 7.23E-07 | SEC14L1    |
| ENSG00000246228 | 0.907445357 | 37.07617048 | -5.352662723 | 9.44E-08 | 7.25E-07 | CASC8      |
| ENSG00000175832 | 129.0091023 | 1220.865644 | -3.242739807 | 9.48E-08 | 7.27E-07 | ETV4       |
| ENSG00000116990 | 124.2762061 | 10.35242721 | 3.597067327  | 9.50E-08 | 7.28E-07 | MYCL       |
| ENSG00000178789 | 33.23313091 | 0           | 7.387604181  | 9.59E-08 | 7.36E-07 | CD300LB    |
| ENSG00000151014 | 48.89971977 | 202.8539953 | -2.051158403 | 9.60E-08 | 7.36E-07 | NOCT       |
| ENSG00000140403 | 498.0944579 | 182.2961403 | 1.448563742  | 9.60E-08 | 7.36E-07 | DNAJA4     |
| ENSG00000230445 | 43.48653139 | 1.762625967 | 4.605559062  | 9.64E-08 | 7.39E-07 | LRRRC37A6P |
| ENSG00000170667 | 173.5160934 | 36.6439314  | 2.24655927   | 9.65E-08 | 7.39E-07 | RASA4B     |
| ENSG00000143398 | 823.7776757 | 1735.289506 | -1.074717598 | 9.66E-08 | 7.39E-07 | PIP5K1A    |
| ENSG00000236453 | 0           | 341.6934692 | -10.99760213 | 9.68E-08 | 7.41E-07 | AC003092.1 |
| ENSG00000100122 | 29.14642159 | 0           | 7.198611792  | 9.69E-08 | 7.41E-07 | CRYBB1     |
| ENSG00000284753 | 11.92139977 | 93.34935027 | -2.972448209 | 9.71E-08 | 7.43E-07 | EEF1AKMT4  |
| ENSG00000172757 | 8683.975572 | 17303.44461 | -0.994634361 | 9.71E-08 | 7.43E-07 | CFL1       |
| ENSG00000258943 | 29.54518309 | 0           | 7.219141187  | 9.87E-08 | 7.55E-07 | AL049871.1 |
| ENSG00000117411 | 962.6443797 | 2047.608689 | -1.088983829 | 9.88E-08 | 7.55E-07 | B4GALT2    |
| ENSG00000196917 | 136.8486369 | 14.20841687 | 3.254901383  | 9.91E-08 | 7.58E-07 | HCAR1      |
| ENSG00000171497 | 366.1953856 | 727.2060768 | -0.989555801 | 1.00E-07 | 7.64E-07 | PPID       |
| ENSG00000167286 | 65.74535393 | 0           | 8.372191303  | 1.00E-07 | 7.66E-07 | CD3D       |
| ENSG00000270071 | 29.30613423 | 0           | 7.207149444  | 1.00E-07 | 7.67E-07 | AP001172.1 |
| ENSG00000174780 | 1153.978744 | 2589.068045 | -1.165970112 | 1.01E-07 | 7.71E-07 | SRP72      |
| ENSG00000159259 | 65.5602561  | 418.2887345 | -2.672676333 | 1.01E-07 | 7.73E-07 | CHAF1B     |
| ENSG00000154080 | 52.63713006 | 0           | 8.051566563  | 1.01E-07 | 7.73E-07 | CHST9      |
| ENSG00000231609 | 211.177514  | 20.55388666 | 3.362418227  | 1.02E-07 | 7.77E-07 | AC007098.1 |
| ENSG00000185298 | 357.4146711 | 1030.129146 | -1.527507855 | 1.02E-07 | 7.77E-07 | CCDC137    |
| ENSG00000259863 | 29.5035276  | 156.3724639 | -2.404212629 | 1.02E-07 | 7.78E-07 | SH3RF3-AS1 |
| ENSG00000091483 | 887.918454  | 2306.159678 | -1.377115909 | 1.03E-07 | 7.82E-07 | FH         |
| ENSG00000233101 | 6.100389606 | 54.52856796 | -3.164147413 | 1.03E-07 | 7.83E-07 | HOXB-AS3   |
| ENSG00000049323 | 884.8762585 | 6234.092876 | -2.816720524 | 1.03E-07 | 7.83E-07 | LTBP1      |
| ENSG00000279833 | 53.8708815  | 4.778958462 | 3.514187807  | 1.03E-07 | 7.83E-07 | AL031846.2 |
| ENSG00000205837 | 35.76377239 | 0           | 7.494773976  | 1.03E-07 | 7.84E-07 | LINC00487  |
| ENSG00000170421 | 33.95550557 | 538.3983827 | -3.988080575 | 1.03E-07 | 7.85E-07 | KRT8       |
| ENSG00000163251 | 78.851471   | 18.54811979 | 2.084417268  | 1.03E-07 | 7.86E-07 | FZD5       |

|                 |             |             |              |          |          |            |
|-----------------|-------------|-------------|--------------|----------|----------|------------|
| ENSG00000103356 | 275.2355063 | 641.1037774 | -1.220383253 | 1.04E-07 | 7.89E-07 | EARS2      |
| ENSG00000134817 | 60.49954262 | 0           | 8.252183444  | 1.05E-07 | 8.01E-07 | APLNR      |
| ENSG00000129235 | 304.2248651 | 825.4179325 | -1.440480323 | 1.06E-07 | 8.03E-07 | TXNDC17    |
| ENSG00000130054 | 48.7113154  | 0.387220594 | 6.977546466  | 1.06E-07 | 8.04E-07 | FAM155B    |
| ENSG00000078401 | 80.23786864 | 379.1989844 | -2.240770386 | 1.07E-07 | 8.12E-07 | EDN1       |
| ENSG00000173991 | 88.59654363 | 9.070479245 | 3.273236641  | 1.07E-07 | 8.15E-07 | TCAP       |
| ENSG00000114670 | 215.1750557 | 38.53557665 | 2.475427606  | 1.08E-07 | 8.16E-07 | NEK11      |
| ENSG00000196591 | 1333.146917 | 3064.245189 | -1.200769444 | 1.08E-07 | 8.19E-07 | HDAC2      |
| ENSG00000069956 | 579.2363822 | 1393.293408 | -1.265992085 | 1.09E-07 | 8.28E-07 | MAPK6      |
| novel.522       | 60.76073024 | 2.587817834 | 4.577170222  | 1.10E-07 | 8.33E-07 | -          |
| ENSG00000162599 | 1165.794293 | 313.9163158 | 1.892051256  | 1.11E-07 | 8.39E-07 | NFIA       |
| novel.994       | 46.16037426 | 0           | 7.863107898  | 1.12E-07 | 8.48E-07 | -          |
| ENSG00000176208 | 69.91283947 | 241.4711326 | -1.787025746 | 1.14E-07 | 8.63E-07 | ATAD5      |
| ENSG00000101443 | 90.53372315 | 0.743759607 | 6.966166252  | 1.14E-07 | 8.65E-07 | WFDC2      |
| ENSG00000186810 | 50.61710992 | 0           | 7.994777863  | 1.15E-07 | 8.71E-07 | CXCR3      |
| ENSG00000070785 | 298.2903851 | 833.9078206 | -1.483652333 | 1.16E-07 | 8.79E-07 | EIF2B3     |
| ENSG00000130304 | 2320.093769 | 498.9349192 | 2.217755943  | 1.16E-07 | 8.80E-07 | SLC27A1    |
| ENSG00000167658 | 26053.59977 | 65144.84763 | -1.322167911 | 1.17E-07 | 8.82E-07 | EEF2       |
| ENSG00000140564 | 1565.70983  | 3698.871574 | -1.24030226  | 1.17E-07 | 8.82E-07 | FURIN      |
| ENSG00000090615 | 1926.592403 | 3670.98781  | -0.93005554  | 1.18E-07 | 8.89E-07 | GOLGA3     |
| ENSG00000243323 | 29.14266064 | 0           | 7.198462601  | 1.18E-07 | 8.95E-07 | PTPRVP     |
| ENSG00000130638 | 1209.591946 | 2544.808757 | -1.073068086 | 1.19E-07 | 8.98E-07 | ATXN10     |
| ENSG00000174428 | 711.6133975 | 218.4320041 | 1.704160766  | 1.19E-07 | 9.00E-07 | GTF2IRD2B  |
| ENSG00000159173 | 46.99664602 | 0.336469917 | 6.926994442  | 1.20E-07 | 9.07E-07 | TNNI1      |
| ENSG00000261801 | 19.70336535 | 503.6824722 | -4.677821868 | 1.20E-07 | 9.08E-07 | LOXL1-AS1  |
| ENSG00000205336 | 640.5069647 | 84.36603548 | 2.926320347  | 1.21E-07 | 9.11E-07 | ADGRG1     |
| ENSG00000112208 | 129.6428666 | 993.0171217 | -2.937859406 | 1.22E-07 | 9.18E-07 | BAG2       |
| ENSG00000119401 | 229.457853  | 562.9810556 | -1.294608298 | 1.23E-07 | 9.25E-07 | TRIM32     |
| ENSG00000198821 | 75.73993189 | 0.336469917 | 7.614496261  | 1.23E-07 | 9.28E-07 | CD247      |
| ENSG00000132164 | 91.39204608 | 0           | 8.847506286  | 1.23E-07 | 9.28E-07 | SLC6A11    |
| ENSG00000132938 | 0.909952655 | 45.26369071 | -5.640871131 | 1.24E-07 | 9.31E-07 | MTUS2      |
| ENSG00000239521 | 320.0737048 | 78.98200291 | 2.019736388  | 1.24E-07 | 9.35E-07 | CASTOR3    |
| ENSG00000189423 | 128.6089171 | 19.83849688 | 2.698087532  | 1.24E-07 | 9.36E-07 | USP32P3    |
| ENSG00000141499 | 176.2938755 | 415.5008549 | -1.237492615 | 1.25E-07 | 9.39E-07 | WRAP53     |
| ENSG00000050730 | 3.076037145 | 190.2929616 | -5.956839283 | 1.25E-07 | 9.44E-07 | TNIP3      |
| ENSG00000066697 | 240.1103713 | 906.6617768 | -1.916483501 | 1.26E-07 | 9.47E-07 | MSANTD3    |
| ENSG00000197815 | 358.3314937 | 34.34897767 | 3.38411098   | 1.27E-07 | 9.53E-07 | AC12129.1  |
| ENSG00000205363 | 176.5475252 | 12.69954429 | 3.791843154  | 1.27E-07 | 9.56E-07 | INSYN1     |
| ENSG00000154864 | 301.2964191 | 16.14580411 | 4.21327605   | 1.28E-07 | 9.62E-07 | PIEZO2     |
| ENSG00000181045 | 601.564726  | 275.9590188 | 1.124949588  | 1.28E-07 | 9.62E-07 | SLC26A11   |
| ENSG00000159593 | 649.9868187 | 1438.118336 | -1.145573164 | 1.29E-07 | 9.67E-07 | NAE1       |
| ENSG00000147246 | 50.04706855 | 0           | 7.978644966  | 1.29E-07 | 9.68E-07 | HTR2C      |
| ENSG00000182858 | 133.7083077 | 320.5289299 | -1.261592362 | 1.30E-07 | 9.74E-07 | ALG12      |
| ENSG00000078618 | 1868.701541 | 3867.489191 | -1.049288368 | 1.30E-07 | 9.74E-07 | NRDC       |
| ENSG00000174307 | 4498.462035 | 1756.788361 | 1.356306641  | 1.30E-07 | 9.76E-07 | PHLDA3     |
| ENSG00000287677 | 84.8238021  | 0           | 8.739900498  | 1.30E-07 | 9.77E-07 | AC025839.1 |
| ENSG00000232611 | 50.53469692 | 7.938214774 | 2.674722575  | 1.30E-07 | 9.79E-07 | AL683813.1 |
| ENSG00000167674 | 1419.325963 | 2966.066156 | -1.063343574 | 1.31E-07 | 9.82E-07 | HDGFL2     |
| ENSG00000109881 | 104.507366  | 403.6409206 | -1.950474631 | 1.31E-07 | 9.83E-07 | CCDC34     |
| ENSG00000168490 | 189.6671473 | 47.42859769 | 1.999587744  | 1.32E-07 | 9.87E-07 | PHYHIP     |
| ENSG00000158435 | 521.2354112 | 1070.223245 | -1.038028867 | 1.32E-07 | 9.88E-07 | CNOT11     |

|                 |             |             |              |          |          |             |
|-----------------|-------------|-------------|--------------|----------|----------|-------------|
| ENSG00000153253 | 34.78827364 | 0           | 7.455054933  | 1.32E-07 | 9.88E-07 | SCN3A       |
| ENSG00000126561 | 764.5617149 | 147.4979365 | 2.372168158  | 1.32E-07 | 9.89E-07 | STAT5A      |
| ENSG00000162892 | 1.233423615 | 10324.07308 | -13.03501347 | 1.32E-07 | 9.92E-07 | IL24        |
| ENSG00000164440 | 87.21017346 | 6.685664122 | 3.694152242  | 1.35E-07 | 1.01E-06 | TXLNB       |
| ENSG00000105137 | 1211.199915 | 2839.597155 | -1.229130388 | 1.35E-07 | 1.01E-06 | SYDE1       |
| ENSG00000065183 | 331.0267557 | 1029.708148 | -1.637663411 | 1.35E-07 | 1.01E-06 | WDR3        |
| ENSG00000095587 | 128.0969152 | 3.168712922 | 5.326272895  | 1.36E-07 | 1.01E-06 | TLL2        |
| ENSG00000065882 | 677.8698547 | 1902.130257 | -1.488534013 | 1.36E-07 | 1.02E-06 | TBC1D1      |
| ENSG00000263618 | 73.35487288 | 0           | 8.53101977   | 1.36E-07 | 1.02E-06 | AP005121.1  |
| ENSG00000183508 | 76.00928214 | 3.210006989 | 4.560487809  | 1.37E-07 | 1.02E-06 | TENT5C      |
| novel.590       | 9.182766265 | 104.9388354 | -3.517704322 | 1.38E-07 | 1.03E-06 | -           |
| ENSG00000250072 | 45.0144495  | 5.319715359 | 3.070907962  | 1.39E-07 | 1.03E-06 | SH3TC2-DT   |
| ENSG00000121552 | 131.0821035 | 9.632461113 | 3.749766826  | 1.39E-07 | 1.04E-06 | CSTA        |
| ENSG00000090621 | 2281.355954 | 5116.52927  | -1.165332545 | 1.40E-07 | 1.04E-06 | PABPC4      |
| ENSG00000106809 | 4498.013734 | 3.761376372 | 10.2165979   | 1.41E-07 | 1.05E-06 | OGN         |
| novel.998       | 36.67734345 | 0           | 7.53106767   | 1.41E-07 | 1.05E-06 | -           |
| ENSG00000159899 | 518.9106546 | 1013.441998 | -0.965508765 | 1.41E-07 | 1.05E-06 | NPR2        |
| ENSG00000234362 | 38.97577377 | 1.742556871 | 4.451308309  | 1.41E-07 | 1.05E-06 | LINC01914   |
| ENSG00000163395 | 2.459325337 | 53.72241771 | -4.461129295 | 1.42E-07 | 1.05E-06 | IGFN1       |
| ENSG00000139155 | 108.836486  | 1.426156051 | 6.247348976  | 1.42E-07 | 1.06E-06 | SLCO1C1     |
| ENSG00000173692 | 1241.444319 | 3433.502494 | -1.467782779 | 1.43E-07 | 1.06E-06 | PSMD1       |
| ENSG00000092199 | 6169.619746 | 13306.61319 | -1.108916719 | 1.43E-07 | 1.06E-06 | HNRNPC      |
| ENSG00000133687 | 174.8559197 | 2416.251791 | -3.788834298 | 1.43E-07 | 1.07E-06 | TMTC1       |
| ENSG00000178952 | 2306.086181 | 5255.883038 | -1.188533215 | 1.43E-07 | 1.07E-06 | TUFM        |
| ENSG00000072818 | 371.7666332 | 106.3334107 | 1.807499681  | 1.44E-07 | 1.07E-06 | ACAP1       |
| ENSG00000048991 | 384.2393137 | 777.3031539 | -1.016266714 | 1.44E-07 | 1.07E-06 | R3HDM1      |
| ENSG00000173465 | 234.8414242 | 604.6289223 | -1.364536914 | 1.46E-07 | 1.08E-06 | ZNRD2       |
| ENSG00000076604 | 441.0848561 | 1212.930049 | -1.459710146 | 1.48E-07 | 1.10E-06 | TRAF4       |
| ENSG00000242114 | 3.958266985 | 38.78560562 | -3.297381409 | 1.48E-07 | 1.10E-06 | MTFP1       |
| ENSG00000165322 | 1778.297586 | 529.1210438 | 1.749345794  | 1.49E-07 | 1.11E-06 | ARHGAP12    |
| ENSG00000109738 | 423.3633903 | 63.35736615 | 2.73740807   | 1.51E-07 | 1.12E-06 | GLRB        |
| ENSG00000164935 | 0.616711807 | 52.64120789 | -6.439078991 | 1.51E-07 | 1.12E-06 | DCSTAMP     |
| ENSG00000259030 | 92.20415848 | 8.396255142 | 3.465998891  | 1.51E-07 | 1.12E-06 | FPGT-TNNI3K |
| ENSG00000188803 | 77.1035504  | 0           | 8.602204081  | 1.51E-07 | 1.12E-06 | SHISA6      |
| ENSG00000185825 | 2216.984757 | 4837.175652 | -1.125597712 | 1.52E-07 | 1.13E-06 | BCAP31      |
| ENSG00000115525 | 649.6891317 | 208.6576935 | 1.637221361  | 1.52E-07 | 1.13E-06 | ST3GAL5     |
| ENSG00000169783 | 47.37201512 | 5.656185276 | 3.052942031  | 1.54E-07 | 1.14E-06 | LINGO1      |
| ENSG00000224126 | 5.484931447 | 67.66651588 | -3.630585579 | 1.54E-07 | 1.14E-06 | UBE2SP2     |
| ENSG00000109943 | 49.70590361 | 0           | 7.968571871  | 1.55E-07 | 1.15E-06 | CRTAM       |
| ENSG00000188993 | 107.5262487 | 10.52731688 | 3.342802154  | 1.55E-07 | 1.15E-06 | LRRC66      |
| ENSG00000255690 | 443.0639016 | 8.888701506 | 5.629599711  | 1.56E-07 | 1.15E-06 | TRIL        |
| ENSG00000198722 | 1382.049618 | 618.6645385 | 1.15939363   | 1.57E-07 | 1.17E-06 | UNC13B      |
| ENSG00000166669 | 461.046649  | 70.16930544 | 2.714160963  | 1.57E-07 | 1.17E-06 | ATF7IP2     |
| ENSG00000136541 | 48.23153674 | 0.774441189 | 6.056489828  | 1.58E-07 | 1.17E-06 | ERMN        |
| ENSG00000007923 | 356.3283248 | 920.912925  | -1.369817282 | 1.59E-07 | 1.17E-06 | DNAJC11     |
| ENSG00000124766 | 859.749938  | 356.1575438 | 1.271327333  | 1.59E-07 | 1.18E-06 | SOX4        |
| ENSG00000139874 | 5.196776466 | 345.1964378 | -6.056175827 | 1.59E-07 | 1.18E-06 | SSTR1       |
| ENSG00000158856 | 112.5149459 | 6.05286248  | 4.211951231  | 1.59E-07 | 1.18E-06 | DMTN        |
| ENSG00000144406 | 38.25006509 | 0           | 7.590448363  | 1.60E-07 | 1.18E-06 | UNC80       |
| ENSG00000187017 | 121.5474043 | 4.748276881 | 4.68659888   | 1.60E-07 | 1.18E-06 | ESPN        |
| ENSG00000154654 | 1868.789459 | 70.91948639 | 4.718182026  | 1.61E-07 | 1.19E-06 | NCAM2       |

|                 |             |             |              |          |          |            |
|-----------------|-------------|-------------|--------------|----------|----------|------------|
| ENSG00000167258 | 515.6235052 | 1077.342548 | -1.063121065 | 1.61E-07 | 1.19E-06 | CDK12      |
| ENSG00000162244 | 9427.807773 | 18342.40738 | -0.960194364 | 1.64E-07 | 1.21E-06 | RPL29      |
| ENSG00000143106 | 930.3890685 | 2307.206293 | -1.310413582 | 1.67E-07 | 1.23E-06 | PSMA5      |
| ENSG00000198959 | 1347.80591  | 30635.5379  | -4.506545454 | 1.67E-07 | 1.23E-06 | TGM2       |
| ENSG00000259877 | 132.6029704 | 37.28618965 | 1.834261284  | 1.67E-07 | 1.23E-06 | AC009113.1 |
| ENSG00000106636 | 1942.647665 | 4016.574179 | -1.047978215 | 1.68E-07 | 1.24E-06 | YKT6       |
| ENSG00000080298 | 431.9430927 | 100.753953  | 2.101477227  | 1.70E-07 | 1.25E-06 | RFX3       |
| novel.781       | 63.43765022 | 204.4915963 | -1.688074412 | 1.71E-07 | 1.26E-06 | -          |
| ENSG00000067715 | 8.539585292 | 75.82780246 | -3.155777667 | 1.71E-07 | 1.26E-06 | SYT1       |
| ENSG00000128591 | 624.9002598 | 9285.164306 | -3.893301202 | 1.72E-07 | 1.27E-06 | FLNC       |
| ENSG00000125637 | 424.4354879 | 97.56213573 | 2.119934647  | 1.73E-07 | 1.27E-06 | PSD4       |
| ENSG00000257176 | 98.92516303 | 10.65949981 | 3.209819369  | 1.73E-07 | 1.27E-06 | AC009318.1 |
| ENSG00000172116 | 64.50601843 | 0           | 8.344758645  | 1.73E-07 | 1.28E-06 | CD8B       |
| ENSG00000204556 | 41.83665264 | 2.435565801 | 4.07154383   | 1.74E-07 | 1.28E-06 | AL450124.1 |
| ENSG00000160013 | 50.33228861 | 399.0557056 | -2.987428733 | 1.74E-07 | 1.28E-06 | PTGIR      |
| ENSG00000163006 | 28.99018516 | 109.8543903 | -1.922456595 | 1.76E-07 | 1.29E-06 | CCDC138    |
| ENSG00000170522 | 410.443056  | 1087.823353 | -1.40580886  | 1.77E-07 | 1.30E-06 | ELOVL6     |
| ENSG00000179057 | 62.90786746 | 4.688069593 | 3.749415956  | 1.78E-07 | 1.31E-06 | IGSF22     |
| ENSG00000138135 | 463.2141123 | 17.46100219 | 4.72254513   | 1.79E-07 | 1.32E-06 | CH25H      |
| ENSG00000114251 | 283.8432138 | 9455.912553 | -5.058109138 | 1.80E-07 | 1.32E-06 | WNT5A      |
| ENSG00000169762 | 750.0771233 | 239.7872548 | 1.644105517  | 1.81E-07 | 1.33E-06 | TAPT1      |
| ENSG00000147364 | 642.5348771 | 277.3759751 | 1.212183717  | 1.81E-07 | 1.33E-06 | FBXO25     |
| ENSG00000083845 | 4768.857758 | 12924.62667 | -1.438422602 | 1.82E-07 | 1.34E-06 | RPS5       |
| ENSG00000245573 | 118.8597275 | 36.80936446 | 1.688707919  | 1.82E-07 | 1.34E-06 | BDNF-AS    |
| ENSG00000161551 | 402.8859928 | 125.8581225 | 1.678635501  | 1.83E-07 | 1.35E-06 | ZNF577     |
| ENSG00000130741 | 1968.015006 | 4738.257285 | -1.267599026 | 1.84E-07 | 1.35E-06 | EIF2S3     |
| ENSG00000260400 | 131.4846263 | 22.41343766 | 2.543572237  | 1.84E-07 | 1.35E-06 | AL513534.2 |
| ENSG00000264575 | 78.13167456 | 18.17151168 | 2.099828819  | 1.84E-07 | 1.35E-06 | LINC00526  |
| ENSG00000164983 | 999.5477659 | 381.4126342 | 1.390543981  | 1.84E-07 | 1.35E-06 | TMEM65     |
| ENSG00000188785 | 257.341305  | 108.5744501 | 1.244633523  | 1.85E-07 | 1.36E-06 | ZNF548     |
| ENSG00000167178 | 329.9413754 | 5.492036488 | 5.914059683  | 1.86E-07 | 1.36E-06 | ISLR2      |
| ENSG00000116729 | 1418.096569 | 3702.387991 | -1.384477642 | 1.86E-07 | 1.36E-06 | WLS        |
| ENSG00000061794 | 534.7904636 | 1176.193289 | -1.137331425 | 1.87E-07 | 1.37E-06 | MRPS35     |
| ENSG00000162878 | 1547.4192   | 206.8523265 | 2.902148797  | 1.88E-07 | 1.37E-06 | PKDCC      |
| ENSG00000091137 | 284.9462434 | 10.89562425 | 4.704043628  | 1.88E-07 | 1.38E-06 | SLC26A4    |
| ENSG00000181072 | 0           | 31.94396505 | -7.576621002 | 1.89E-07 | 1.38E-06 | CHRM2      |
| ENSG00000102543 | 338.9326635 | 136.3982352 | 1.313433375  | 1.89E-07 | 1.38E-06 | CDADC1     |
| ENSG00000223812 | 83.31515874 | 1.733100261 | 5.559702052  | 1.90E-07 | 1.38E-06 | AC073365.1 |
| ENSG00000058804 | 280.6139485 | 934.9673045 | -1.736791224 | 1.91E-07 | 1.39E-06 | NDC1       |
| ENSG00000236963 | 57.66177176 | 0.387220594 | 7.221953667  | 1.91E-07 | 1.39E-06 | LINC01141  |
| ENSG00000234807 | 43.79237999 | 3.698728939 | 3.592623918  | 1.92E-07 | 1.40E-06 | LINC01135  |
| ENSG00000140396 | 888.8476818 | 330.7334715 | 1.425389971  | 1.93E-07 | 1.41E-06 | NCOA2      |
| ENSG00000167207 | 101.5423623 | 3.067083173 | 5.088448849  | 1.94E-07 | 1.42E-06 | NOD2       |
| ENSG00000135063 | 59.9528933  | 3.444975551 | 4.089704605  | 1.95E-07 | 1.42E-06 | FAM189A2   |
| ENSG00000122545 | 6148.256868 | 3310.081162 | 0.893257516  | 1.95E-07 | 1.42E-06 | SEPT7      |
| ENSG00000168488 | 1419.84022  | 3040.947238 | -1.098697666 | 1.96E-07 | 1.43E-06 | ATXN2L     |
| ENSG00000197324 | 3099.61945  | 5702.079515 | -0.879380082 | 1.97E-07 | 1.43E-06 | LRP10      |
| ENSG00000277494 | 84.26217992 | 1.069617038 | 6.292189537  | 1.97E-07 | 1.43E-06 | GPIHBP1    |
| ENSG00000144229 | 118.6241107 | 0.672939833 | 7.396905304  | 1.98E-07 | 1.44E-06 | THSD7B     |
| ENSG00000198842 | 36.2611734  | 0           | 7.5142306    | 1.98E-07 | 1.44E-06 | DUSP27     |
| ENSG00000168754 | 45.1628793  | 0.387220594 | 6.869606521  | 2.00E-07 | 1.46E-06 | FAM178B    |

|                 |             |             |              |          |          |              |
|-----------------|-------------|-------------|--------------|----------|----------|--------------|
| ENSG00000180875 | 26.69615653 | 410.673385  | -3.94452591  | 2.01E-07 | 1.46E-06 | GREM2        |
| ENSG00000128536 | 270.3011592 | 31.27718978 | 3.109883615  | 2.01E-07 | 1.46E-06 | CDHR3        |
| ENSG00000172059 | 301.4768149 | 104.3098865 | 1.533098299  | 2.02E-07 | 1.47E-06 | KLF11        |
| ENSG00000231453 | 94.03239609 | 0.387220594 | 7.926731377  | 2.03E-07 | 1.47E-06 | LINC01305    |
| ENSG00000181458 | 180.2534239 | 724.7828873 | -2.008048804 | 2.03E-07 | 1.48E-06 | TMEM45A      |
| ENSG00000175756 | 1378.840307 | 3041.878431 | -1.141576915 | 2.04E-07 | 1.48E-06 | AURKAIP1     |
| ENSG00000166965 | 219.0388284 | 720.6960731 | -1.718282243 | 2.05E-07 | 1.49E-06 | RCCD1        |
| ENSG00000025800 | 1019.291219 | 1890.105347 | -0.890921664 | 2.07E-07 | 1.50E-06 | KPNA6        |
| ENSG00000178035 | 1568.62178  | 4718.280468 | -1.588821349 | 2.08E-07 | 1.51E-06 | IMPDH2       |
| ENSG00000061455 | 67.92416124 | 8.652448675 | 2.976467319  | 2.09E-07 | 1.51E-06 | PRDM6        |
| ENSG00000225683 | 37.00661228 | 0           | 7.542795424  | 2.10E-07 | 1.52E-06 | PACRG-AS3    |
| ENSG00000106006 | 0           | 38.40814561 | -7.846776071 | 2.10E-07 | 1.52E-06 | HOXA6        |
| ENSG00000166148 | 29.71012379 | 0           | 7.226480935  | 2.11E-07 | 1.53E-06 | AVPR1A       |
| ENSG00000188820 | 152.28498   | 13.25664586 | 3.529803198  | 2.11E-07 | 1.53E-06 | CALHM6       |
| ENSG00000119147 | 73.17146749 | 0           | 8.526661761  | 2.11E-07 | 1.53E-06 | C2orf40      |
| ENSG00000167986 | 3165.490769 | 6738.96934  | -1.090059314 | 2.12E-07 | 1.54E-06 | DDB1         |
| novel.773       | 49.5333701  | 0           | 7.9639341    | 2.15E-07 | 1.56E-06 | -            |
| ENSG00000105612 | 900.4053788 | 455.042408  | 0.984813167  | 2.15E-07 | 1.56E-06 | DNASE2       |
| ENSG00000055044 | 476.0448525 | 1345.332696 | -1.49892317  | 2.17E-07 | 1.57E-06 | NOP58        |
| ENSG00000188321 | 473.3128161 | 162.2483005 | 1.544823408  | 2.18E-07 | 1.58E-06 | ZNF559       |
| ENSG00000013306 | 1326.907188 | 2835.276433 | -1.095357178 | 2.19E-07 | 1.58E-06 | SLC25A39     |
| ENSG00000164244 | 911.6786821 | 2217.561888 | -1.282344008 | 2.19E-07 | 1.58E-06 | PRRC1        |
| ENSG00000125977 | 1338.864087 | 3526.107212 | -1.397177132 | 2.19E-07 | 1.59E-06 | EIF2S2       |
| ENSG00000163220 | 57.39951613 | 0.356539013 | 7.215618284  | 2.21E-07 | 1.60E-06 | S100A9       |
| ENSG00000147065 | 8242.145945 | 15177.42233 | -0.880824356 | 2.21E-07 | 1.60E-06 | MSN          |
| ENSG00000251448 | 29.45191419 | 0           | 7.214816876  | 2.22E-07 | 1.60E-06 | AC063919.1   |
| ENSG00000081760 | 342.2864705 | 833.9862735 | -1.284346498 | 2.24E-07 | 1.62E-06 | AACS         |
| ENSG00000121690 | 881.4548409 | 94.0578048  | 3.228802002  | 2.24E-07 | 1.62E-06 | DEPDC7       |
| ENSG00000100714 | 649.3217552 | 2028.153246 | -1.643275902 | 2.26E-07 | 1.63E-06 | MTHFD1       |
| ENSG00000214106 | 233.2915099 | 99.89119149 | 1.224022887  | 2.27E-07 | 1.64E-06 | PAXIP1-AS2   |
| ENSG00000149295 | 64.59320507 | 0.387220594 | 7.38538762   | 2.28E-07 | 1.65E-06 | DRD2         |
| ENSG00000186314 | 24.30592476 | 98.60551911 | -2.021457436 | 2.30E-07 | 1.66E-06 | PRELID2      |
| ENSG00000176714 | 126.5790103 | 9.623004503 | 3.700606419  | 2.30E-07 | 1.66E-06 | CCDC121      |
| novel.279       | 32.09240674 | 0           | 7.338719552  | 2.30E-07 | 1.66E-06 | -            |
| ENSG00000280734 | 76.90627138 | 14.37945372 | 2.419535951  | 2.32E-07 | 1.67E-06 | LINC01232    |
| ENSG00000166897 | 48.16175934 | 692.6639945 | -3.846917871 | 2.33E-07 | 1.68E-06 | ELFN2        |
| ENSG00000069702 | 781.0395286 | 125.3725299 | 2.637500419  | 2.33E-07 | 1.68E-06 | TGFBR3       |
| ENSG00000114841 | 614.2081593 | 199.2863406 | 1.624620032  | 2.33E-07 | 1.68E-06 | DNAH1        |
| ENSG00000173660 | 1303.617276 | 3296.917645 | -1.338628849 | 2.33E-07 | 1.68E-06 | UQCRH        |
| ENSG00000224165 | 66.41701352 | 9.591038651 | 2.785376619  | 2.38E-07 | 1.71E-06 | DNAJC27-AS1  |
| ENSG00000125741 | 389.893801  | 786.0314311 | -1.011737795 | 2.39E-07 | 1.72E-06 | OPA3         |
| ENSG00000250903 | 160.7731378 | 53.17811198 | 1.593724536  | 2.40E-07 | 1.73E-06 | GMDS-DT      |
| ENSG00000173950 | 239.5575518 | 908.4894466 | -1.923583111 | 2.40E-07 | 1.73E-06 | XXYL1        |
| ENSG00000003096 | 397.7783262 | 61.74468047 | 2.684815444  | 2.41E-07 | 1.73E-06 | KLHL13       |
| ENSG00000092964 | 4047.380047 | 2116.217844 | 0.935409698  | 2.41E-07 | 1.73E-06 | DPYSL2       |
| ENSG00000047457 | 626.5978175 | 1.130980201 | 9.138683586  | 2.41E-07 | 1.74E-06 | CP           |
| ENSG00000170889 | 0.308355904 | 46.93589453 | -7.169552641 | 2.42E-07 | 1.74E-06 | RPS9         |
| ENSG00000169764 | 1187.573964 | 3549.333332 | -1.579613413 | 2.43E-07 | 1.74E-06 | UGP2         |
| ENSG00000225101 | 30.61101617 | 0           | 7.270559012  | 2.43E-07 | 1.74E-06 | OR52K3P      |
| ENSG00000138768 | 1543.817202 | 3264.986821 | -1.080460471 | 2.44E-07 | 1.75E-06 | USO1         |
| ENSG00000231889 | 156.3238097 | 42.68263256 | 1.872862849  | 2.45E-07 | 1.76E-06 | TRAF3IP2-AS1 |

|                 |             |             |              |          |          |            |
|-----------------|-------------|-------------|--------------|----------|----------|------------|
| ENSG00000061656 | 44.2344063  | 435.7651442 | -3.300689272 | 2.47E-07 | 1.77E-06 | SPAG4      |
| ENSG00000166557 | 860.7681718 | 2969.606815 | -1.786651243 | 2.47E-07 | 1.77E-06 | TMED3      |
| ENSG00000010438 | 0           | 41.04915426 | -7.942561068 | 2.47E-07 | 1.77E-06 | PRSS3      |
| ENSG00000149328 | 164.8654312 | 33.25330255 | 2.311509088  | 2.48E-07 | 1.77E-06 | GLB1L2     |
| ENSG00000147434 | 34.68615792 | 0           | 7.45093034   | 2.48E-07 | 1.78E-06 | CHRNA6     |
| ENSG00000108094 | 565.1933021 | 1078.828154 | -0.93275305  | 2.49E-07 | 1.79E-06 | CUL2       |
| ENSG00000211893 | 94.52449742 | 0           | 8.896147821  | 2.49E-07 | 1.79E-06 | IGHG2      |
| ENSG00000107959 | 924.5603824 | 2012.31812  | -1.122086593 | 2.51E-07 | 1.80E-06 | PITRM1     |
| ENSG00000171714 | 42.66497559 | 0           | 7.748749746  | 2.51E-07 | 1.80E-06 | ANO5       |
| ENSG00000130175 | 3297.498265 | 7554.712458 | -1.195984806 | 2.52E-07 | 1.80E-06 | PRKCSH     |
| novel.184       | 376.897666  | 22.6095523  | 4.052253694  | 2.52E-07 | 1.80E-06 | -          |
| ENSG00000131831 | 69.5977446  | 5.961973611 | 3.530120361  | 2.55E-07 | 1.82E-06 | RAI2       |
| ENSG00000163527 | 1721.60916  | 5304.052941 | -1.623417831 | 2.56E-07 | 1.83E-06 | STT3B      |
| ENSG00000188573 | 56.90673027 | 3.944309986 | 3.850383044  | 2.57E-07 | 1.84E-06 | FBLL1      |
| ENSG00000163781 | 475.6245937 | 939.9747033 | -0.982878163 | 2.64E-07 | 1.89E-06 | TOPBP1     |
| ENSG00000144579 | 3407.043867 | 1843.82348  | 0.885890757  | 2.64E-07 | 1.89E-06 | CTDSP1     |
| ENSG00000114268 | 186.8557034 | 1515.2699   | -3.019362631 | 2.65E-07 | 1.89E-06 | PFKFB4     |
| ENSG00000185842 | 21.05749595 | 123.9666528 | -2.559956024 | 2.66E-07 | 1.90E-06 | DNAH14     |
| ENSG00000125107 | 1101.52818  | 2774.948926 | -1.332937119 | 2.70E-07 | 1.93E-06 | CNOT1      |
| ENSG00000147955 | 1079.841976 | 3082.730095 | -1.513530248 | 2.70E-07 | 1.93E-06 | SIGMAR1    |
| ENSG00000133422 | 553.5080166 | 1146.391953 | -1.050143372 | 2.71E-07 | 1.93E-06 | MORC2      |
| ENSG00000113296 | 163.3728885 | 12.2178388  | 3.741746993  | 2.71E-07 | 1.93E-06 | THBS4      |
| ENSG00000073067 | 56.50328269 | 0           | 8.15450367   | 2.71E-07 | 1.94E-06 | CYP2W1     |
| ENSG00000141564 | 517.2273261 | 1311.906778 | -1.342538072 | 2.72E-07 | 1.94E-06 | RPTOR      |
| ENSG00000188112 | 11.96925224 | 170.4470412 | -3.835824708 | 2.72E-07 | 1.94E-06 | C6orf132   |
| ENSG00000285517 | 22.53484083 | 128.3973259 | -2.507472613 | 2.73E-07 | 1.94E-06 | AC010198.2 |
| ENSG00000231680 | 30.83057613 | 0           | 7.279286815  | 2.73E-07 | 1.95E-06 | AP003774.3 |
| ENSG00000251247 | 167.9987531 | 42.3933173  | 1.98999745   | 2.73E-07 | 1.95E-06 | ZNF345     |
| ENSG00000282057 | 10.29519816 | 87.3197674  | -3.086008515 | 2.75E-07 | 1.95E-06 | AC092807.3 |
| novel.769       | 31.16099951 | 0           | 7.29633954   | 2.75E-07 | 1.95E-06 | -          |
| ENSG00000130733 | 454.5495456 | 1150.197334 | -1.339382517 | 2.75E-07 | 1.96E-06 | YIPF2      |
| ENSG00000173473 | 951.8424196 | 2255.36147  | -1.24465266  | 2.76E-07 | 1.96E-06 | SMARCC1    |
| novel.31        | 28.94129251 | 148.9398293 | -2.365268458 | 2.76E-07 | 1.96E-06 | -          |
| ENSG00000175643 | 68.15904972 | 274.8472902 | -2.011716417 | 2.76E-07 | 1.97E-06 | RMI2       |
| ENSG00000181191 | 1021.856166 | 435.7169873 | 1.229358448  | 2.77E-07 | 1.97E-06 | PJA1       |
| ENSG00000273356 | 42.86989085 | 3.546476906 | 3.585212126  | 2.78E-07 | 1.98E-06 | LINC02019  |
| ENSG00000105197 | 737.0301137 | 1860.705004 | -1.336177667 | 2.78E-07 | 1.98E-06 | TIMM50     |
| ENSG00000134905 | 1089.088497 | 2444.955054 | -1.166591765 | 2.78E-07 | 1.98E-06 | CARS2      |
| ENSG00000162595 | 220.5198344 | 27.40973573 | 3.000902216  | 2.80E-07 | 1.98E-06 | DIRAS3     |
| ENSG00000160299 | 576.4177718 | 1394.15506  | -1.274000586 | 2.80E-07 | 1.99E-06 | PCNT       |
| ENSG00000141385 | 504.4129835 | 1019.730565 | -1.015709041 | 2.81E-07 | 1.99E-06 | AFG3L2     |
| ENSG00000130528 | 82.47938517 | 0.387220594 | 7.737597856  | 2.81E-07 | 2.00E-06 | HRC        |
| ENSG00000101082 | 35.49875255 | 0           | 7.482722319  | 2.82E-07 | 2.00E-06 | SLA2       |
| ENSG00000185158 | 241.1405324 | 82.35004131 | 1.552011453  | 2.82E-07 | 2.00E-06 | LRRC37B    |
| ENSG00000131373 | 185.7619334 | 408.0457926 | -1.134846871 | 2.83E-07 | 2.00E-06 | HACL1      |
| ENSG00000234661 | 42.69700099 | 0           | 7.750451662  | 2.83E-07 | 2.01E-06 | CHL1-AS1   |
| ENSG00000176485 | 3648.945029 | 199.0646599 | 4.19542459   | 2.84E-07 | 2.01E-06 | PLAAT3     |
| ENSG00000260572 | 45.56199681 | 2.598430319 | 4.163012238  | 2.84E-07 | 2.01E-06 | AC069224.1 |
| ENSG00000097046 | 112.0985346 | 307.8947772 | -1.45866374  | 2.84E-07 | 2.01E-06 | CDC7       |
| ENSG00000138385 | 1004.250075 | 3323.596016 | -1.726756682 | 2.85E-07 | 2.02E-06 | SSB        |
| ENSG00000106397 | 2430.28515  | 5070.156829 | -1.06086456  | 2.85E-07 | 2.02E-06 | PLOD3      |



|                 |             |             |              |          |          |            |
|-----------------|-------------|-------------|--------------|----------|----------|------------|
| ENSG00000101198 | 94.68832841 | 0.693008929 | 7.057223714  | 2.86E-07 | 2.02E-06 | NKAIN4     |
| ENSG00000130669 | 607.8872259 | 1268.96067  | -1.061672405 | 2.87E-07 | 2.03E-06 | PAK4       |
| ENSG00000111269 | 2112.002995 | 645.924531  | 1.709365669  | 2.92E-07 | 2.07E-06 | CREBL2     |
| ENSG00000183317 | 27.99742007 | 0           | 7.140392758  | 2.93E-07 | 2.07E-06 | EPHA10     |
| ENSG00000198157 | 201.6558176 | 76.90071155 | 1.389381318  | 2.94E-07 | 2.07E-06 | HMGNS      |
| ENSG00000130589 | 1154.281476 | 3070.184635 | -1.411199262 | 2.94E-07 | 2.08E-06 | HELZ2      |
| ENSG00000156299 | 496.4612455 | 76.72749134 | 2.692216955  | 2.94E-07 | 2.08E-06 | TIAM1      |
| ENSG00000135722 | 40.61583679 | 130.4412703 | -1.684891807 | 2.94E-07 | 2.08E-06 | FBXL8      |
| ENSG00000204116 | 447.1646613 | 164.154959  | 1.446251259  | 2.96E-07 | 2.09E-06 | CHIC1      |
| ENSG00000262801 | 33.61015311 | 0           | 7.405224602  | 2.97E-07 | 2.09E-06 | U91319.1   |
| ENSG00000179058 | 66.82677313 | 10.76215704 | 2.635075425  | 2.98E-07 | 2.10E-06 | C9orf50    |
| ENSG00000166822 | 590.7225941 | 219.1274532 | 1.430726378  | 2.98E-07 | 2.10E-06 | TMEM170A   |
| ENSG00000183723 | 302.3038839 | 720.6214814 | -1.253499237 | 2.98E-07 | 2.10E-06 | CMTM4      |
| ENSG00000116353 | 305.6111636 | 640.6410324 | -1.068184458 | 3.02E-07 | 2.13E-06 | MECR       |
| ENSG00000228956 | 28.87087436 | 0           | 7.184898554  | 3.03E-07 | 2.13E-06 | SATB1-AS1  |
| ENSG00000120616 | 794.3091808 | 249.2707559 | 1.671193044  | 3.04E-07 | 2.15E-06 | EPC1       |
| ENSG00000139433 | 2861.307053 | 1032.729161 | 1.470485516  | 3.09E-07 | 2.18E-06 | GLTP       |
| ENSG00000228486 | 119.5177388 | 40.65204469 | 1.557193927  | 3.09E-07 | 2.18E-06 | C2orf92    |
| ENSG00000270164 | 32.45230478 | 0           | 7.354587437  | 3.11E-07 | 2.19E-06 | LINC01480  |
| ENSG00000184156 | 454.8140524 | 35.93761305 | 3.666413081  | 3.12E-07 | 2.19E-06 | KCNQ3      |
| ENSG00000174807 | 733.1665045 | 7725.53489  | -3.397480594 | 3.19E-07 | 2.25E-06 | CD248      |
| ENSG00000150893 | 314.2280805 | 0           | 10.62941059  | 3.21E-07 | 2.26E-06 | FREM2      |
| ENSG00000281103 | 47.53953439 | 1.00940975  | 5.485581086  | 3.22E-07 | 2.26E-06 | TRG-AS1    |
| ENSG00000186889 | 211.3259991 | 79.37744303 | 1.413284173  | 3.22E-07 | 2.26E-06 | TMEM17     |
| ENSG00000182985 | 2705.116959 | 116.5927189 | 4.537139948  | 3.24E-07 | 2.28E-06 | CADM1      |
| ENSG00000187514 | 10131.05133 | 17686.57598 | -0.803878803 | 3.25E-07 | 2.28E-06 | PTMA       |
| ENSG00000224189 | 2.421502061 | 39.11261893 | -4.013551944 | 3.25E-07 | 2.28E-06 | HAGLR      |
| ENSG00000125910 | 38.60369489 | 0           | 7.603757405  | 3.26E-07 | 2.29E-06 | S1PR4      |
| ENSG00000177627 | 63.14223025 | 0.356539013 | 7.353153759  | 3.26E-07 | 2.29E-06 | C12orf54   |
| ENSG00000128487 | 836.0143255 | 375.5725819 | 1.153777331  | 3.29E-07 | 2.31E-06 | SPECC1     |
| ENSG00000198176 | 1395.658661 | 2749.973981 | -0.978586961 | 3.31E-07 | 2.32E-06 | TFDP1      |
| ENSG00000118004 | 651.8807078 | 2.10970837  | 8.264250755  | 3.31E-07 | 2.32E-06 | COLEC11    |
| ENSG00000226125 | 26.20362792 | 0           | 7.046093633  | 3.31E-07 | 2.32E-06 | LINC01907  |
| ENSG00000136161 | 810.7208789 | 161.3698835 | 2.327226268  | 3.32E-07 | 2.33E-06 | RCBTB2     |
| ENSG00000179151 | 416.6421842 | 837.5152498 | -1.00703964  | 3.35E-07 | 2.35E-06 | EDC3       |
| ENSG00000231346 | 41.77089309 | 1.029478846 | 5.291553043  | 3.35E-07 | 2.35E-06 | LINC01160  |
| ENSG00000071242 | 633.5542727 | 2413.017076 | -1.929482019 | 3.35E-07 | 2.35E-06 | RPS6KA2    |
| ENSG00000083312 | 1822.073181 | 4193.282574 | -1.202572345 | 3.37E-07 | 2.36E-06 | TNPO1      |
| ENSG00000128512 | 1006.434367 | 261.9825225 | 1.94269973   | 3.38E-07 | 2.36E-06 | DOCK4      |
| ENSG00000127578 | 46.20725781 | 2.486316478 | 4.207234847  | 3.39E-07 | 2.37E-06 | WFIKK1     |
| ENSG00000138722 | 27.37025179 | 0           | 7.109025022  | 3.39E-07 | 2.37E-06 | MMRN1      |
| ENSG00000103495 | 325.1367667 | 731.761368  | -1.17076351  | 3.40E-07 | 2.38E-06 | MAZ        |
| ENSG00000172236 | 29.37529872 | 0           | 7.210245384  | 3.40E-07 | 2.38E-06 | TPSAB1     |
| ENSG00000125656 | 720.1547035 | 1447.830187 | -1.007665082 | 3.40E-07 | 2.38E-06 | CLPP       |
| ENSG00000080822 | 2515.819177 | 1221.809782 | 1.041946987  | 3.43E-07 | 2.40E-06 | CLDND1     |
| ENSG00000088992 | 36.79235166 | 1.753169357 | 4.365993575  | 3.45E-07 | 2.41E-06 | TESC       |
| ENSG00000254554 | 0.894837599 | 49.40710342 | -5.770403495 | 3.47E-07 | 2.42E-06 | AC080023.1 |
| ENSG00000160505 | 27.35388309 | 0           | 7.108224858  | 3.51E-07 | 2.45E-06 | NLRP4      |
| ENSG00000227486 | 45.86275955 | 5.401147618 | 3.089239262  | 3.51E-07 | 2.45E-06 | AL050309.1 |
| ENSG00000165609 | 641.7712022 | 1259.105219 | -0.972173365 | 3.53E-07 | 2.46E-06 | NUDT5      |
| ENSG00000177000 | 1170.988626 | 400.4281695 | 1.548135067  | 3.53E-07 | 2.47E-06 | MTHFR      |

|                 |             |             |              |          |          |              |
|-----------------|-------------|-------------|--------------|----------|----------|--------------|
| ENSG00000008226 | 41.12291098 | 2.893606169 | 3.835941261  | 3.54E-07 | 2.47E-06 | DLEC1        |
| ENSG00000246731 | 75.01230135 | 9.762203905 | 2.94664213   | 3.58E-07 | 2.49E-06 | AC100786.1   |
| ENSG00000259865 | 406.074033  | 126.967621  | 1.678298732  | 3.58E-07 | 2.50E-06 | AL390728.6   |
| ENSG00000129595 | 60.85575134 | 0.713078025 | 6.406351287  | 3.59E-07 | 2.50E-06 | EPB41L4A     |
| ENSG00000213445 | 4339.762146 | 1466.341761 | 1.565619495  | 3.59E-07 | 2.50E-06 | SIPA1        |
| ENSG00000135318 | 601.4015595 | 11228.06608 | -4.222699647 | 3.63E-07 | 2.53E-06 | NT5E         |
| ENSG00000154945 | 1761.823676 | 771.2389554 | 1.191739583  | 3.63E-07 | 2.53E-06 | ANKRD40      |
| ENSG00000205045 | 28.30061883 | 0           | 7.155975029  | 3.63E-07 | 2.53E-06 | SLFN12L      |
| ENSG00000106682 | 5696.893777 | 10032.2042  | -0.816378251 | 3.64E-07 | 2.53E-06 | EIF4H        |
| ENSG00000109670 | 928.1570433 | 335.587488  | 1.467289733  | 3.64E-07 | 2.53E-06 | FBXW7        |
| ENSG00000139629 | 84.37812886 | 588.0397149 | -2.800787035 | 3.65E-07 | 2.54E-06 | GALNT6       |
| ENSG00000160606 | 31.86994004 | 153.8820506 | -2.273495405 | 3.66E-07 | 2.54E-06 | TLCD1        |
| ENSG00000011304 | 3264.398465 | 7081.497784 | -1.117283028 | 3.66E-07 | 2.54E-06 | PTBP1        |
| ENSG00000178741 | 865.4302822 | 1884.653193 | -1.122753025 | 3.69E-07 | 2.57E-06 | COX5A        |
| ENSG00000108604 | 880.0686322 | 2197.007727 | -1.320039054 | 3.74E-07 | 2.60E-06 | SMARCD2      |
| ENSG00000179331 | 28.01002782 | 0           | 7.141029438  | 3.74E-07 | 2.60E-06 | RAB39A       |
| ENSG00000107262 | 1435.243225 | 559.7860063 | 1.35785781   | 3.76E-07 | 2.61E-06 | BAG1         |
| ENSG00000242071 | 959.7330698 | 1937.870475 | -1.013840451 | 3.76E-07 | 2.61E-06 | RPL7AP6      |
| ENSG00000258708 | 64.62537266 | 9.233343763 | 2.801423703  | 3.77E-07 | 2.62E-06 | SLC25A21-AS1 |
| ENSG00000160801 | 87.33360121 | 4.861674991 | 4.14854604   | 3.78E-07 | 2.62E-06 | PTH1R        |
| ENSG00000099822 | 21.47165725 | 318.8995741 | -3.894733544 | 3.79E-07 | 2.63E-06 | HCN2         |
| ENSG00000250657 | 0           | 77.75204304 | -8.861220173 | 3.80E-07 | 2.63E-06 | AC097451.1   |
| ENSG00000113396 | 137.7700004 | 2.476859868 | 5.789957366  | 3.81E-07 | 2.64E-06 | SLC27A6      |
| ENSG00000103064 | 143.5236559 | 370.4005422 | -1.368036015 | 3.82E-07 | 2.65E-06 | SLC7A6       |
| ENSG00000109079 | 779.8473506 | 1439.169519 | -0.884058113 | 3.82E-07 | 2.65E-06 | TNFAIP1      |
| ENSG00000136717 | 3955.200038 | 1318.084482 | 1.585413452  | 3.83E-07 | 2.65E-06 | BIN1         |
| ENSG00000197747 | 8421.409347 | 3346.338122 | 1.331479187  | 3.86E-07 | 2.67E-06 | S100A10      |
| ENSG00000185942 | 26.1972884  | 0           | 7.045747286  | 3.86E-07 | 2.68E-06 | NKAIN3       |
| ENSG00000273271 | 63.93469523 | 11.50591665 | 2.476121748  | 3.86E-07 | 2.68E-06 | AP000254.1   |
| ENSG00000169692 | 439.0706064 | 1048.99329  | -1.256333384 | 3.88E-07 | 2.69E-06 | AGPAT2       |
| ENSG00000089847 | 142.3846127 | 34.40807626 | 2.045271026  | 3.89E-07 | 2.69E-06 | ANKRD24      |
| ENSG00000159055 | 138.7651452 | 347.2739454 | -1.323785486 | 3.91E-07 | 2.71E-06 | MIS18A       |
| ENSG00000184216 | 1564.290977 | 3341.055624 | -1.094910213 | 3.91E-07 | 2.71E-06 | IRAK1        |
| ENSG00000102886 | 115.0473118 | 38.23783226 | 1.587033176  | 3.92E-07 | 2.71E-06 | GDPD3        |
| ENSG00000182004 | 510.0960485 | 1249.619033 | -1.292835984 | 3.92E-07 | 2.71E-06 | SNRPE        |
| ENSG00000233850 | 26.58372688 | 0           | 7.066470466  | 3.92E-07 | 2.71E-06 | AC103563.7   |
| ENSG00000133110 | 227.7779128 | 3919.135582 | -4.105021788 | 3.93E-07 | 2.71E-06 | POSTN        |
| ENSG00000268460 | 37.26737263 | 0           | 7.554460003  | 3.93E-07 | 2.71E-06 | AC006262.1   |
| ENSG00000099804 | 699.8674784 | 1466.274015 | -1.066809484 | 3.94E-07 | 2.72E-06 | CDC34        |
| ENSG00000267680 | 347.4751552 | 127.2299319 | 1.449972102  | 4.01E-07 | 2.77E-06 | ZNF224       |
| ENSG00000125743 | 1499.597265 | 3492.774867 | -1.219803198 | 4.01E-07 | 2.77E-06 | SNRPD2       |
| ENSG00000131097 | 37.65445185 | 1.4981317   | 4.698232068  | 4.01E-07 | 2.77E-06 | HIGD1B       |
| ENSG00000177239 | 1649.715707 | 3236.788779 | -0.972322837 | 4.02E-07 | 2.77E-06 | MAN1B1       |
| ENSG00000139343 | 514.4940204 | 1195.061068 | -1.216096085 | 4.06E-07 | 2.80E-06 | SNRPF        |
| ENSG00000103528 | 107.8464138 | 13.58250329 | 2.99772589   | 4.08E-07 | 2.81E-06 | SYT17        |
| ENSG00000169299 | 299.0121472 | 783.9121374 | -1.390949464 | 4.08E-07 | 2.81E-06 | PGM2         |
| ENSG00000163728 | 1146.243392 | 598.1292139 | 0.938360146  | 4.08E-07 | 2.81E-06 | TTC14        |
| ENSG00000106080 | 386.6652446 | 1128.926212 | -1.545988259 | 4.10E-07 | 2.83E-06 | FKBP14       |
| ENSG00000138756 | 442.9266314 | 135.5740237 | 1.709168472  | 4.12E-07 | 2.84E-06 | BMP2K        |
| ENSG00000168288 | 814.1283912 | 2047.30764  | -1.330516242 | 4.13E-07 | 2.85E-06 | MMADHC       |
| ENSG00000181035 | 468.5126339 | 220.0763989 | 1.090430286  | 4.14E-07 | 2.85E-06 | SLC25A42     |

|                 |             |             |              |          |          |            |
|-----------------|-------------|-------------|--------------|----------|----------|------------|
| ENSG00000159917 | 131.9381214 | 32.83437289 | 2.00486399   | 4.15E-07 | 2.86E-06 | ZNF235     |
| ENSG00000116704 | 268.5397882 | 623.7426068 | -1.216363148 | 4.15E-07 | 2.86E-06 | SLC35D1    |
| ENSG00000172007 | 486.2743906 | 206.6521838 | 1.234291525  | 4.23E-07 | 2.91E-06 | RAB33B     |
| ENSG00000265206 | 214.1952972 | 8.050200221 | 4.752135726  | 4.23E-07 | 2.91E-06 | AC004687.1 |
| ENSG00000182378 | 226.632191  | 1146.09046  | -2.33791339  | 4.24E-07 | 2.92E-06 | PLCXD1     |
| ENSG00000197208 | 67.57604423 | 726.8694751 | -3.426915305 | 4.27E-07 | 2.94E-06 | SLC22A4    |
| ENSG00000119523 | 524.1327175 | 1098.433211 | -1.067193205 | 4.28E-07 | 2.94E-06 | ALG2       |
| ENSG00000119714 | 22.31237413 | 626.4404807 | -4.811896391 | 4.31E-07 | 2.96E-06 | GPR68      |
| ENSG00000150961 | 623.6441443 | 3291.233868 | -2.399939148 | 4.33E-07 | 2.98E-06 | SEC24D     |
| ENSG00000069974 | 170.0937627 | 610.1539393 | -1.843323517 | 4.35E-07 | 2.99E-06 | RAB27A     |
| ENSG00000146966 | 941.5467131 | 143.4734661 | 2.715799703  | 4.36E-07 | 3.00E-06 | DENND2A    |
| ENSG00000122574 | 55.74791302 | 1.069617038 | 5.695710749  | 4.37E-07 | 3.00E-06 | WIPF3      |
| ENSG00000175087 | 249.620939  | 69.45849198 | 1.843635779  | 4.37E-07 | 3.00E-06 | PDIK1L     |
| ENSG00000128833 | 37.71623699 | 1.854670712 | 4.379730143  | 4.39E-07 | 3.01E-06 | MYO5C      |
| ENSG00000196705 | 644.3215899 | 226.6623123 | 1.506936172  | 4.40E-07 | 3.02E-06 | ZNF431     |
| ENSG00000250548 | 0.879722543 | 35.59566773 | -5.302150694 | 4.43E-07 | 3.04E-06 | LINC01303  |
| ENSG00000140157 | 435.0906279 | 1141.276935 | -1.391636182 | 4.43E-07 | 3.04E-06 | NIPA2      |
| ENSG00000101251 | 30.53669454 | 0           | 7.267152525  | 4.43E-07 | 3.04E-06 | SEL1L2     |
| novel.950       | 0           | 28.07065041 | -7.39307003  | 4.44E-07 | 3.04E-06 | -          |
| ENSG00000119383 | 1978.508779 | 4738.505468 | -1.260100354 | 4.48E-07 | 3.07E-06 | PTPA       |
| ENSG00000170004 | 2527.226691 | 4560.501609 | -0.851615359 | 4.50E-07 | 3.08E-06 | CHD3       |
| ENSG00000261098 | 66.6118996  | 15.5812537  | 2.102250017  | 4.52E-07 | 3.10E-06 | AP000766.1 |
| ENSG00000064666 | 1120.50663  | 5059.108198 | -2.174789172 | 4.54E-07 | 3.11E-06 | CNN2       |
| ENSG00000141639 | 59.92803344 | 0           | 8.238549673  | 4.56E-07 | 3.12E-06 | MAPK4      |
| ENSG00000140575 | 2708.932744 | 5668.391697 | -1.065166155 | 4.56E-07 | 3.12E-06 | IQGAP1     |
| ENSG00000068796 | 253.3299854 | 570.7175176 | -1.172203773 | 4.61E-07 | 3.15E-06 | KIF2A      |
| ENSG00000159588 | 60.20691503 | 13.58494344 | 2.145360324  | 4.61E-07 | 3.15E-06 | CCDC17     |
| ENSG00000087116 | 1111.939838 | 3146.220899 | -1.500601164 | 4.61E-07 | 3.15E-06 | ADAMTS2    |
| ENSG00000232682 | 36.67086174 | 0           | 7.531182151  | 4.62E-07 | 3.15E-06 | AL592430.1 |
| ENSG00000177311 | 1348.284411 | 3307.052829 | -1.294314836 | 4.62E-07 | 3.15E-06 | ZBTB38     |
| ENSG00000114416 | 1755.010539 | 3247.015526 | -0.887599616 | 4.63E-07 | 3.16E-06 | FXR1       |
| ENSG00000145901 | 1329.01445  | 10351.81742 | -2.961439403 | 4.64E-07 | 3.17E-06 | TNIP1      |
| ENSG00000162444 | 57.1907252  | 2.91483114  | 4.30556805   | 4.66E-07 | 3.18E-06 | RBP7       |
| ENSG00000152455 | 95.32814719 | 289.9143715 | -1.605734732 | 4.67E-07 | 3.19E-06 | SUV39H2    |
| ENSG00000152270 | 112.5755209 | 28.91000361 | 1.96392065   | 4.69E-07 | 3.20E-06 | PDE3B      |
| ENSG00000159307 | 61.49782086 | 0           | 8.275859232  | 4.70E-07 | 3.21E-06 | SCUBE1     |
| ENSG00000227051 | 152.272416  | 574.7485    | -1.915799796 | 4.71E-07 | 3.21E-06 | C14orf132  |
| ENSG00000118515 | 3608.447613 | 868.8496585 | 2.054176513  | 4.72E-07 | 3.22E-06 | SGK1       |
| novel.905       | 5597.02658  | 31.40145716 | 7.476392402  | 4.72E-07 | 3.22E-06 | -          |
| ENSG00000272808 | 128.01084   | 8.253331325 | 3.971835717  | 4.75E-07 | 3.24E-06 | AC015712.6 |
| ENSG00000086504 | 893.7930151 | 1873.749854 | -1.068041265 | 4.75E-07 | 3.24E-06 | MRPL28     |
| ENSG00000156219 | 62.61150675 | 1.426156051 | 5.448863926  | 4.77E-07 | 3.25E-06 | ART3       |
| ENSG00000121797 | 43.87318333 | 0.387220594 | 6.826660176  | 4.77E-07 | 3.25E-06 | CCRL2      |
| ENSG00000167595 | 127.2119208 | 406.5562184 | -1.675360874 | 4.82E-07 | 3.28E-06 | PROSER3    |
| ENSG00000171587 | 40.78482316 | 0           | 7.683117791  | 4.89E-07 | 3.33E-06 | DSCAM      |
| ENSG00000158163 | 124.5320944 | 339.2984989 | -1.446998568 | 4.90E-07 | 3.34E-06 | DZIP1L     |
| ENSG00000140526 | 873.0385316 | 2541.668101 | -1.541579936 | 4.94E-07 | 3.36E-06 | ABHD2      |
| ENSG00000260118 | 43.20561357 | 0.387220594 | 6.805913806  | 4.94E-07 | 3.36E-06 | AL157700.1 |
| ENSG00000284730 | 36.39072685 | 2.51699806  | 3.855281466  | 4.96E-07 | 3.37E-06 | C12orf81   |
| ENSG00000154309 | 322.3953697 | 98.68237505 | 1.707213748  | 4.98E-07 | 3.39E-06 | DISP1      |
| ENSG00000223382 | 23.92826182 | 0           | 6.914325212  | 4.99E-07 | 3.39E-06 | LINC01778  |

|                 |             |             |              |          |          |            |
|-----------------|-------------|-------------|--------------|----------|----------|------------|
| ENSG00000198822 | 65.42119949 | 0           | 8.365140778  | 4.99E-07 | 3.39E-06 | GRM3       |
| ENSG00000167642 | 527.9584245 | 21.20230947 | 4.63242821   | 5.00E-07 | 3.39E-06 | SPINT2     |
| ENSG00000131055 | 23.93954466 | 0           | 6.914936257  | 5.02E-07 | 3.41E-06 | COX4I2     |
| ENSG00000225194 | 49.73627627 | 0           | 7.969527711  | 5.07E-07 | 3.44E-06 | LINC00092  |
| ENSG00000173110 | 406.8461802 | 55.47635776 | 2.876427527  | 5.08E-07 | 3.44E-06 | HSPA6      |
| novel.292       | 80.67270123 | 19.93413764 | 2.012495642  | 5.09E-07 | 3.45E-06 | -          |
| ENSG00000143324 | 412.4636731 | 827.7483749 | -1.004898269 | 5.09E-07 | 3.45E-06 | XPR1       |
| ENSG00000088298 | 382.0347927 | 827.7952391 | -1.115360926 | 5.09E-07 | 3.45E-06 | EDEM2      |
| ENSG00000063978 | 846.2510718 | 1771.191639 | -1.065496918 | 5.12E-07 | 3.47E-06 | RNF4       |
| ENSG00000173272 | 619.4490837 | 1271.968364 | -1.038034334 | 5.15E-07 | 3.49E-06 | MZT2A      |
| ENSG00000113205 | 46.56528929 | 0.713078025 | 6.019940927  | 5.15E-07 | 3.49E-06 | PCDHB3     |
| ENSG00000101182 | 2580.96001  | 5345.525499 | -1.050478025 | 5.15E-07 | 3.49E-06 | PSMA7      |
| novel.784       | 32.12062775 | 0           | 7.338420513  | 5.17E-07 | 3.50E-06 | -          |
| ENSG00000177363 | 332.925083  | 14.4102637  | 4.526155018  | 5.19E-07 | 3.51E-06 | LRRN4CL    |
| novel.30        | 143.7598415 | 32.40560144 | 2.154467818  | 5.20E-07 | 3.52E-06 | -          |
| ENSG00000234155 | 0.921306765 | 54.44431038 | -5.896884602 | 5.21E-07 | 3.52E-06 | LINC02535  |
| ENSG00000120328 | 40.22710447 | 1.386017859 | 4.820784538  | 5.22E-07 | 3.53E-06 | PCDHB12    |
| ENSG00000179761 | 40.51658437 | 2.567748738 | 3.999389349  | 5.23E-07 | 3.53E-06 | PIPOX      |
| ENSG00000185565 | 336.1106923 | 25.8498085  | 3.704901551  | 5.23E-07 | 3.54E-06 | LSAMP      |
| ENSG00000198715 | 517.938161  | 1211.388016 | -1.225657001 | 5.23E-07 | 3.54E-06 | GLMP       |
| ENSG00000153561 | 1109.218902 | 417.9560571 | 1.407543592  | 5.25E-07 | 3.55E-06 | RMND5A     |
| ENSG00000232859 | 197.6639868 | 47.91171583 | 2.039672306  | 5.25E-07 | 3.55E-06 | LYRM9      |
| ENSG00000145287 | 60.15780892 | 6.338453325 | 3.271571547  | 5.26E-07 | 3.55E-06 | PLAC8      |
| ENSG00000152207 | 93.47009043 | 2.375358513 | 5.262116862  | 5.28E-07 | 3.57E-06 | CYSLTR2    |
| ENSG00000138772 | 1730.778752 | 112.3051106 | 3.944624036  | 5.31E-07 | 3.59E-06 | ANXA3      |
| ENSG00000234571 | 48.33175807 | 0.672939833 | 6.088986449  | 5.37E-07 | 3.62E-06 | AC239798.2 |
| ENSG00000100764 | 624.4155434 | 1272.975495 | -1.027879621 | 5.38E-07 | 3.63E-06 | PSMC1      |
| ENSG00000177508 | 74.25582022 | 921.3586491 | -3.633834321 | 5.38E-07 | 3.63E-06 | IRX3       |
| ENSG00000090273 | 1714.386782 | 3822.295125 | -1.156805741 | 5.39E-07 | 3.63E-06 | NUDC       |
| ENSG00000196470 | 410.4086224 | 160.3848155 | 1.357083968  | 5.41E-07 | 3.65E-06 | SIAH1      |
| ENSG00000138688 | 2342.334569 | 950.3552304 | 1.301500458  | 5.43E-07 | 3.66E-06 | KIAA1109   |
| ENSG00000101150 | 2280.153445 | 4745.304111 | -1.057415783 | 5.44E-07 | 3.67E-06 | TPD5L2     |
| ENSG00000173598 | 3446.3375   | 1037.211649 | 1.732118067  | 5.45E-07 | 3.67E-06 | NUDT4      |
| ENSG00000151468 | 179.8359004 | 12.76103584 | 3.805909354  | 5.46E-07 | 3.68E-06 | CCDC3      |
| ENSG00000235954 | 451.4446634 | 109.7878901 | 2.040402678  | 5.49E-07 | 3.69E-06 | TTC28-AS1  |
| ENSG00000283041 | 1861.270807 | 4836.20133  | -1.377636399 | 5.50E-07 | 3.70E-06 | AC008038.1 |
| ENSG00000251867 | 60.77068851 | 10.18126196 | 2.586399528  | 5.50E-07 | 3.70E-06 | AC009812.1 |
| ENSG00000105401 | 3011.873273 | 6209.808595 | -1.04383965  | 5.50E-07 | 3.70E-06 | CDC37      |
| ENSG00000239672 | 408.6230641 | 1137.133921 | -1.476875648 | 5.50E-07 | 3.70E-06 | NME1       |
| ENSG00000064393 | 2466.591587 | 6870.222576 | -1.477794634 | 5.59E-07 | 3.76E-06 | HIPK2      |
| ENSG00000197265 | 356.1337075 | 1036.784231 | -1.541938485 | 5.59E-07 | 3.76E-06 | GTF2E2     |
| ENSG00000134698 | 865.4299711 | 353.4582073 | 1.292372079  | 5.59E-07 | 3.76E-06 | AGO4       |
| ENSG00000111087 | 249.1344774 | 16.45732464 | 3.919223321  | 5.61E-07 | 3.77E-06 | GLI1       |
| ENSG00000105664 | 0.909952655 | 157.2812498 | -7.435115301 | 5.62E-07 | 3.77E-06 | COMP       |
| ENSG00000197283 | 10.23348429 | 63.18127343 | -2.623938352 | 5.62E-07 | 3.77E-06 | SYNGAP1    |
| ENSG00000162951 | 297.0521648 | 0           | 10.54831585  | 5.64E-07 | 3.78E-06 | LRRTM1     |
| ENSG00000116819 | 85.51165967 | 16.00976836 | 2.424665274  | 5.66E-07 | 3.80E-06 | TFAP2E     |
| ENSG00000180318 | 0           | 36.69314102 | -7.776236338 | 5.71E-07 | 3.83E-06 | ALX1       |
| ENSG00000065978 | 11003.06991 | 20888.35617 | -0.924806371 | 5.74E-07 | 3.85E-06 | YBX1       |
| ENSG00000272031 | 60.89920212 | 162.5917057 | -1.416973213 | 5.75E-07 | 3.85E-06 | ANKRD34A   |
| ENSG00000279360 | 39.10289154 | 0           | 7.623258485  | 5.83E-07 | 3.91E-06 | AC007546.2 |

|                 |             |             |              |          |          |             |
|-----------------|-------------|-------------|--------------|----------|----------|-------------|
| ENSG00000198612 | 1071.027883 | 2362.530001 | -1.141482081 | 5.84E-07 | 3.91E-06 | COPS8       |
| ENSG00000035664 | 137.9500273 | 10.99596973 | 3.644750516  | 5.84E-07 | 3.91E-06 | DAPK2       |
| ENSG00000254054 | 23.94086958 | 0           | 6.915017422  | 5.88E-07 | 3.94E-06 | AC087273.2  |
| ENSG00000168005 | 352.5499276 | 790.2665036 | -1.164172616 | 5.91E-07 | 3.96E-06 | SPINDOC     |
| ENSG00000152779 | 1811.098674 | 98.2560906  | 4.202910298  | 5.93E-07 | 3.97E-06 | SLC16A12    |
| ENSG00000205502 | 47.21473886 | 0.336469917 | 6.933138179  | 5.94E-07 | 3.98E-06 | C2CD4B      |
| ENSG00000152672 | 23.83624656 | 0           | 6.909290562  | 5.94E-07 | 3.98E-06 | CLEC4F      |
| ENSG00000229644 | 63.05017156 | 1128.446135 | -4.16162243  | 5.97E-07 | 4.00E-06 | NAMPTP1     |
| ENSG00000136930 | 1589.118209 | 3256.002147 | -1.034809935 | 5.98E-07 | 4.00E-06 | PSMB7       |
| ENSG00000245904 | 37.04658685 | 2.241891306 | 4.08629274   | 6.03E-07 | 4.03E-06 | AC025164.1  |
| ENSG00000228203 | 2.775203133 | 93.55847036 | -5.084525501 | 6.04E-07 | 4.04E-06 | RNF144A-AS1 |
| ENSG00000178568 | 55.30158413 | 1.00940975  | 5.709264372  | 6.05E-07 | 4.05E-06 | ERBB4       |
| ENSG00000093144 | 2416.514466 | 1216.473897 | 0.990044912  | 6.05E-07 | 4.05E-06 | ECHDC1      |
| ENSG00000226711 | 94.82405066 | 26.1817021  | 1.856865045  | 6.07E-07 | 4.05E-06 | FAM66C      |
| ENSG00000077348 | 234.4332742 | 500.8711158 | -1.095224757 | 6.08E-07 | 4.06E-06 | EXOSC5      |
| ENSG00000082516 | 262.6217482 | 618.8576991 | -1.23720366  | 6.12E-07 | 4.09E-06 | GEMIN5      |
| ENSG00000284650 | 42.8365127  | 0           | 7.755217923  | 6.16E-07 | 4.11E-06 | AL031430.1  |
| ENSG00000275713 | 3.965860148 | 61.78772553 | -3.965105872 | 6.17E-07 | 4.12E-06 | HIST1H2BH   |
| ENSG00000250303 | 208.885677  | 36.40323064 | 2.519103868  | 6.17E-07 | 4.12E-06 | AP002884.1  |
| ENSG00000185129 | 1276.849037 | 574.3365181 | 1.15279136   | 6.19E-07 | 4.13E-06 | PURA        |
| ENSG00000205581 | 2716.336233 | 5317.379878 | -0.969113023 | 6.19E-07 | 4.13E-06 | HMGN1       |
| novel.1045      | 2.420248412 | 78.95962239 | -5.025826687 | 6.22E-07 | 4.15E-06 | -           |
| ENSG00000102898 | 1298.3183   | 2578.884871 | -0.990137911 | 6.22E-07 | 4.15E-06 | NUTF2       |
| ENSG00000261218 | 23.82113151 | 0           | 6.908454659  | 6.28E-07 | 4.19E-06 | AC099524.1  |
| ENSG00000114491 | 305.0471763 | 790.1452153 | -1.373517436 | 6.29E-07 | 4.19E-06 | UMPS        |
| ENSG00000130653 | 404.2991885 | 95.63253565 | 2.08124533   | 6.31E-07 | 4.20E-06 | PNPLA7      |
| ENSG00000167850 | 57.11375373 | 1.426156051 | 5.316113916  | 6.32E-07 | 4.21E-06 | CD300C      |
| ENSG00000169136 | 287.8280953 | 815.3290411 | -1.502109912 | 6.32E-07 | 4.21E-06 | ATF5        |
| ENSG00000160193 | 106.9546965 | 411.6218549 | -1.945088148 | 6.32E-07 | 4.21E-06 | WDR4        |
| ENSG00000152642 | 935.595863  | 206.0349218 | 2.181707214  | 6.33E-07 | 4.21E-06 | GPD1L       |
| ENSG00000115761 | 277.9532985 | 646.2319201 | -1.217564099 | 6.38E-07 | 4.24E-06 | NOL10       |
| ENSG00000092529 | 89.48593935 | 10.5661708  | 3.089375802  | 6.39E-07 | 4.25E-06 | CAPN3       |
| ENSG00000115468 | 731.1813293 | 20.40420316 | 5.159584179  | 6.40E-07 | 4.26E-06 | EFHD1       |
| ENSG00000131148 | 401.7557807 | 826.1776044 | -1.040471464 | 6.43E-07 | 4.27E-06 | EMC8        |
| ENSG00000146021 | 319.8206798 | 100.1706178 | 1.677480003  | 6.44E-07 | 4.28E-06 | KLHL3       |
| ENSG00000267023 | 116.5311384 | 39.46085721 | 1.562140149  | 6.46E-07 | 4.29E-06 | LRRC37A16P  |
| ENSG00000196449 | 214.6034753 | 495.9534375 | -1.208519704 | 6.47E-07 | 4.30E-06 | YRDC        |
| ENSG00000186111 | 858.2335603 | 1971.989117 | -1.200012056 | 6.54E-07 | 4.34E-06 | PIP5K1C     |
| ENSG00000100346 | 74.70813367 | 2.323323566 | 5.060830304  | 6.55E-07 | 4.35E-06 | CACNA1I     |
| ENSG00000164695 | 90.76846943 | 5.104815894 | 4.160433646  | 6.56E-07 | 4.35E-06 | CHMP4C      |
| ENSG00000123213 | 349.3049754 | 1025.291555 | -1.553730596 | 6.56E-07 | 4.35E-06 | NLN         |
| ENSG00000174173 | 253.2680577 | 570.0390211 | -1.171010868 | 6.56E-07 | 4.35E-06 | TRMT10C     |
| ENSG00000177465 | 66.00632809 | 8.681974381 | 2.931053548  | 6.61E-07 | 4.38E-06 | ACOT4       |
| ENSG00000163013 | 108.7039698 | 389.0807853 | -1.838983308 | 6.62E-07 | 4.39E-06 | FBXO41      |
| ENSG00000146233 | 127.2457544 | 8.528438079 | 3.910728161  | 6.73E-07 | 4.46E-06 | CYP39A1     |
| ENSG00000171100 | 374.9755581 | 181.7632517 | 1.044901103  | 6.77E-07 | 4.49E-06 | MTM1        |
| ENSG00000120068 | 3.694002601 | 51.32087272 | -3.806558662 | 6.79E-07 | 4.50E-06 | HOXB8       |
| ENSG00000267369 | 32.14082867 | 0           | 7.339328775  | 6.80E-07 | 4.50E-06 | AC015911.7  |
| ENSG00000120875 | 220.3326131 | 3227.913835 | -3.87276134  | 6.90E-07 | 4.57E-06 | DUSP4       |
| ENSG00000198252 | 269.1479383 | 592.2783738 | -1.138278241 | 6.91E-07 | 4.57E-06 | STYX        |
| ENSG00000150347 | 531.5334024 | 1280.033367 | -1.268106108 | 6.94E-07 | 4.60E-06 | ARID5B      |

|                 |             |             |              |          |          |            |
|-----------------|-------------|-------------|--------------|----------|----------|------------|
| ENSG00000175567 | 713.6906823 | 91.84758819 | 2.955653093  | 6.95E-07 | 4.60E-06 | UCP2       |
| ENSG00000100347 | 541.3862176 | 1146.163689 | -1.082113169 | 6.96E-07 | 4.61E-06 | SAMM50     |
| ENSG00000107372 | 4892.589375 | 2196.462416 | 1.155408657  | 7.01E-07 | 4.64E-06 | ZFAND5     |
| ENSG00000165512 | 616.3304655 | 291.6198254 | 1.07948873   | 7.02E-07 | 4.64E-06 | ZNF22      |
| ENSG00000203778 | 565.9542833 | 257.6344032 | 1.135022001  | 7.05E-07 | 4.66E-06 | FAM229B    |
| ENSG00000177606 | 21466.58488 | 2730.45985  | 2.974920488  | 7.11E-07 | 4.70E-06 | JUN        |
| novel.420       | 22.73384386 | 203.9851517 | -3.164753361 | 7.11E-07 | 4.70E-06 | -          |
| ENSG00000160321 | 24.03908181 | 0           | 6.920409575  | 7.13E-07 | 4.71E-06 | ZNF208     |
| ENSG00000075914 | 336.8458006 | 768.3442065 | -1.190000094 | 7.16E-07 | 4.73E-06 | EXOSC7     |
| ENSG00000118900 | 555.1595325 | 1181.481398 | -1.089725248 | 7.18E-07 | 4.74E-06 | UBN1       |
| ENSG00000272990 | 67.15142647 | 9.835463823 | 2.759447164  | 7.19E-07 | 4.75E-06 | AC084036.1 |
| ENSG00000073536 | 209.1343709 | 487.4677062 | -1.22139369  | 7.22E-07 | 4.77E-06 | NLE1       |
| ENSG00000065135 | 1305.211397 | 2668.902699 | -1.032021918 | 7.23E-07 | 4.77E-06 | GNAI3      |
| ENSG00000203875 | 914.8799715 | 3249.350745 | -1.828607804 | 7.27E-07 | 4.80E-06 | SNHG5      |
| ENSG00000144837 | 29.00551368 | 0           | 7.191294733  | 7.28E-07 | 4.80E-06 | PLA1A      |
| ENSG00000145861 | 93.48174453 | 8.846123169 | 3.395523052  | 7.29E-07 | 4.80E-06 | C1QTNF2    |
| ENSG00000230587 | 44.82479148 | 1.00940975  | 5.402024658  | 7.29E-07 | 4.80E-06 | LINC02580  |
| ENSG00000197599 | 60.51240763 | 7.481330282 | 3.012135031  | 7.30E-07 | 4.81E-06 | CCDC154    |
| ENSG00000273923 | 22.65701493 | 0           | 6.835946904  | 7.31E-07 | 4.82E-06 | AC104260.1 |
| ENSG00000170166 | 2.152223082 | 50.50428556 | -4.565735477 | 7.35E-07 | 4.84E-06 | HOXD4      |
| ENSG00000215021 | 1750.162958 | 4431.624969 | -1.340411928 | 7.37E-07 | 4.85E-06 | PHB2       |
| ENSG00000212719 | 256.418559  | 586.1395371 | -1.192732905 | 7.39E-07 | 4.86E-06 | C17orf51   |
| ENSG00000198093 | 235.0233034 | 97.17016324 | 1.272677267  | 7.40E-07 | 4.87E-06 | ZNF649     |
| ENSG00000134001 | 961.7308803 | 2304.742486 | -1.261056497 | 7.41E-07 | 4.88E-06 | EIF2S1     |
| ENSG00000103994 | 3142.219705 | 1431.623541 | 1.134143738  | 7.48E-07 | 4.92E-06 | ZNF106     |
| ENSG00000128408 | 4.499403511 | 39.02044579 | -3.107870471 | 7.50E-07 | 4.93E-06 | RIBC2      |
| novel.344       | 103.5799057 | 20.35088395 | 2.345805814  | 7.51E-07 | 4.94E-06 | -          |
| ENSG00000163359 | 3332.865548 | 65504.85935 | -4.296778839 | 7.57E-07 | 4.98E-06 | COL6A3     |
| ENSG00000205116 | 36.93569559 | 1.813376645 | 4.358338223  | 7.58E-07 | 4.98E-06 | TMEM88B    |
| ENSG00000168398 | 40.44372985 | 445.6629986 | -3.462726914 | 7.59E-07 | 4.98E-06 | BDKRB2     |
| ENSG00000152377 | 58.27202934 | 695.0383755 | -3.577110841 | 7.60E-07 | 4.99E-06 | SPOCK1     |
| ENSG00000070950 | 122.1364486 | 424.2467609 | -1.797325192 | 7.62E-07 | 5.00E-06 | RAD18      |
| ENSG00000019186 | 1.22840902  | 98.80513574 | -6.338657421 | 7.67E-07 | 5.03E-06 | CYP24A1    |
| ENSG00000139641 | 1546.977857 | 3055.505413 | -0.982013294 | 7.72E-07 | 5.07E-06 | ESYT1      |
| ENSG00000213080 | 31.95282375 | 108.1696006 | -1.758472416 | 7.73E-07 | 5.07E-06 | AL354714.2 |
| ENSG00000104147 | 4.874559155 | 61.02916229 | -3.651085585 | 7.74E-07 | 5.07E-06 | OIP5       |
| ENSG00000171657 | 49.40213503 | 1.060160428 | 5.526076333  | 7.75E-07 | 5.08E-06 | GPR82      |
| ENSG00000183208 | 64.64363576 | 13.8399811  | 2.216053235  | 7.78E-07 | 5.10E-06 | GDPGP1     |
| ENSG00000177990 | 420.8893779 | 90.93770638 | 2.21042124   | 7.78E-07 | 5.10E-06 | DPY19L2    |
| ENSG00000115486 | 647.2154468 | 1243.698841 | -0.942317289 | 7.83E-07 | 5.13E-06 | GGCX       |
| ENSG00000232119 | 658.0843332 | 1271.759791 | -0.95061896  | 7.88E-07 | 5.16E-06 | MCTS1      |
| ENSG00000114698 | 2213.293026 | 232.0760587 | 3.252717692  | 7.91E-07 | 5.18E-06 | PLSCR4     |
| ENSG00000132635 | 1138.537543 | 550.6765791 | 1.047862993  | 7.95E-07 | 5.20E-06 | PCED1A     |
| ENSG00000277135 | 49.94424082 | 4.300848999 | 3.537408038  | 7.98E-07 | 5.22E-06 | AC012409.3 |
| ENSG00000187486 | 31.18560212 | 0           | 7.295866487  | 8.06E-07 | 5.28E-06 | KCNJ11     |
| ENSG00000005100 | 364.3575019 | 726.7963467 | -0.996236868 | 8.17E-07 | 5.35E-06 | DHX33      |
| ENSG00000265296 | 25.66506996 | 0           | 7.015763808  | 8.18E-07 | 5.35E-06 | FEM1AP2    |
| ENSG00000068654 | 570.7200193 | 1720.493831 | -1.591891457 | 8.18E-07 | 5.35E-06 | POLR1A     |
| ENSG00000255571 | 48.48354902 | 0           | 7.932752905  | 8.28E-07 | 5.42E-06 | MIR9-3HG   |
| ENSG00000140961 | 290.062675  | 76.4710882  | 1.921079402  | 8.29E-07 | 5.42E-06 | OSGIN1     |
| ENSG00000225670 | 23.41610176 | 0           | 6.882595784  | 8.29E-07 | 5.42E-06 | CADM3-AS1  |

|                 |             |             |              |          |          |             |
|-----------------|-------------|-------------|--------------|----------|----------|-------------|
| ENSG00000105048 | 0.923814062 | 85.76107759 | -6.54927994  | 8.30E-07 | 5.42E-06 | TNNT1       |
| ENSG00000090339 | 373.1238123 | 1957.287069 | -2.391031248 | 8.31E-07 | 5.43E-06 | ICAM1       |
| ENSG00000272789 | 22.43433477 | 0           | 6.821185524  | 8.35E-07 | 5.45E-06 | AC010976.2  |
| ENSG00000100226 | 741.4298809 | 1772.755393 | -1.257364972 | 8.37E-07 | 5.46E-06 | GTPBP1      |
| ENSG00000179083 | 26.85594044 | 0           | 7.080156446  | 8.39E-07 | 5.47E-06 | FAM133A     |
| ENSG00000131355 | 24.37390688 | 0           | 6.940265032  | 8.43E-07 | 5.50E-06 | ADGRE3      |
| ENSG00000278921 | 28.11576195 | 0           | 7.146244918  | 8.44E-07 | 5.50E-06 | EPB41L4A-DT |
| ENSG00000164818 | 455.8538588 | 985.0292396 | -1.111759699 | 8.46E-07 | 5.52E-06 | DNAAF5      |
| ENSG00000286190 | 270.3845526 | 83.92014866 | 1.689428391  | 8.47E-07 | 5.52E-06 | AC055839.2  |
| ENSG00000134308 | 4377.606984 | 8671.683784 | -0.986201425 | 8.49E-07 | 5.53E-06 | YWHAQ       |
| ENSG00000101224 | 881.3984212 | 2567.460771 | -1.542394604 | 8.49E-07 | 5.53E-06 | CDC25B      |
| ENSG00000277672 | 30.19058663 | 0           | 7.250718103  | 8.53E-07 | 5.56E-06 | AC011603.4  |
| ENSG00000100385 | 134.8727362 | 4.799027558 | 4.823765647  | 8.57E-07 | 5.58E-06 | IL2RB       |
| ENSG00000035687 | 602.5698419 | 1226.750671 | -1.025813898 | 8.62E-07 | 5.61E-06 | ADSS        |
| ENSG00000166974 | 2164.058656 | 560.2246192 | 1.949244179  | 8.63E-07 | 5.61E-06 | MAPRE2      |
| ENSG00000226200 | 131.4162169 | 24.62580326 | 2.409548926  | 8.63E-07 | 5.61E-06 | SGMS1-AS1   |
| ENSG00000054219 | 172.947191  | 9.601779531 | 4.157548367  | 8.63E-07 | 5.62E-06 | LY75        |
| ENSG00000144867 | 498.8441559 | 1376.369164 | -1.464506131 | 8.67E-07 | 5.64E-06 | SRPRB       |
| ENSG00000266088 | 4.622831258 | 109.1605638 | -4.568056735 | 8.68E-07 | 5.65E-06 | AC004585.1  |
| ENSG00000162739 | 40.20725955 | 0           | 7.662549172  | 8.71E-07 | 5.66E-06 | SLAMF6      |
| ENSG00000183378 | 42.15167624 | 0           | 7.732026927  | 8.71E-07 | 5.66E-06 | OVCH2       |
| ENSG00000139146 | 16.18676901 | 105.0693485 | -2.701218571 | 8.74E-07 | 5.68E-06 | SINHCAF     |
| ENSG00000106948 | 883.7309355 | 261.6292883 | 1.756175089  | 8.79E-07 | 5.71E-06 | AKNA        |
| ENSG00000261959 | 26.2364366  | 0           | 7.047633857  | 8.80E-07 | 5.71E-06 | AC015909.3  |
| ENSG00000116489 | 2037.521122 | 3992.919504 | -0.970708124 | 8.81E-07 | 5.72E-06 | CAPZA1      |
| ENSG00000229152 | 396.0157046 | 101.3691257 | 1.966867225  | 8.83E-07 | 5.73E-06 | ANKRD10-IT1 |
| ENSG00000162736 | 1764.48146  | 3501.202103 | -0.988537398 | 8.86E-07 | 5.75E-06 | NCSTN       |
| ENSG00000185904 | 360.9999456 | 12.63000878 | 4.828469899  | 8.86E-07 | 5.75E-06 | LINC00839   |
| ENSG00000182183 | 47.51847927 | 1.803920035 | 4.725224932  | 8.90E-07 | 5.77E-06 | SHISAL2A    |
| ENSG00000182141 | 381.6868776 | 94.45473879 | 2.014977964  | 8.96E-07 | 5.81E-06 | ZNF708      |
| novel.744       | 0.308355904 | 41.85307398 | -7.008298257 | 8.96E-07 | 5.81E-06 | -           |
| ENSG00000211592 | 1235.109381 | 0           | 12.60407159  | 8.97E-07 | 5.81E-06 | IGKC        |
| ENSG00000135045 | 69.97791484 | 359.7791728 | -2.363422127 | 8.97E-07 | 5.81E-06 | C9orf40     |
| ENSG00000105698 | 3957.651668 | 1735.053451 | 1.18983681   | 8.97E-07 | 5.81E-06 | USF2        |
| ENSG00000163596 | 210.9334346 | 73.8868192  | 1.510580129  | 8.99E-07 | 5.82E-06 | ICA1L       |
| ENSG00000113209 | 70.67786636 | 2.375358513 | 4.855357618  | 9.07E-07 | 5.87E-06 | PCDHB5      |
| ENSG00000121653 | 942.864067  | 185.279561  | 2.347796088  | 9.09E-07 | 5.88E-06 | MAPK8IP1    |
| ENSG00000186407 | 39.00782735 | 0           | 7.61914435   | 9.10E-07 | 5.89E-06 | CD300E      |
| ENSG00000165669 | 887.6625379 | 408.0209372 | 1.120673282  | 9.11E-07 | 5.90E-06 | FAM204A     |
| ENSG00000161203 | 5801.432416 | 13251.60499 | -1.191711683 | 9.14E-07 | 5.91E-06 | AP2M1       |
| ENSG00000187372 | 51.93975676 | 2.965581817 | 4.15503938   | 9.14E-07 | 5.91E-06 | PCDHB13     |
| ENSG00000122733 | 53.30069724 | 4.02458637  | 3.741132975  | 9.15E-07 | 5.91E-06 | PHF24       |
| novel.602       | 0.293240848 | 382.1351436 | -10.19720379 | 9.20E-07 | 5.94E-06 | -           |
| ENSG00000047617 | 61.25605123 | 1.00940975  | 5.86034532   | 9.28E-07 | 5.99E-06 | ANO2        |
| ENSG00000179933 | 647.784433  | 1450.86277  | -1.163411382 | 9.29E-07 | 6.00E-06 | C14orf119   |
| ENSG00000057704 | 558.3238521 | 46.52488043 | 3.588728585  | 9.41E-07 | 6.08E-06 | TMCC3       |
| ENSG00000148700 | 7284.841636 | 2159.908802 | 1.753815357  | 9.49E-07 | 6.13E-06 | ADD3        |
| ENSG00000137073 | 529.4618127 | 1226.953661 | -1.212287687 | 9.50E-07 | 6.13E-06 | UBAP2       |
| ENSG00000110427 | 196.7590487 | 479.8451899 | -1.286274803 | 9.52E-07 | 6.14E-06 | KIAA1549L   |
| ENSG00000139318 | 4017.692254 | 1039.190421 | 1.95106514   | 9.59E-07 | 6.18E-06 | DUSP6       |
| ENSG00000250802 | 69.82132276 | 6.604231863 | 3.384081946  | 9.60E-07 | 6.20E-06 | ZBED3-AS1   |

|                 |             |             |              |          |          |            |
|-----------------|-------------|-------------|--------------|----------|----------|------------|
| ENSG00000165475 | 1158.101487 | 275.3064052 | 2.073306326  | 9.70E-07 | 6.25E-06 | CRYL1      |
| ENSG00000227544 | 38.37138498 | 1.41669944  | 4.746768886  | 9.85E-07 | 6.35E-06 | AC018647.1 |
| ENSG00000163794 | 91.06819164 | 15.97091444 | 2.506960368  | 9.86E-07 | 6.36E-06 | UCN        |
| ENSG00000106153 | 2797.075801 | 6197.396475 | -1.147740226 | 9.89E-07 | 6.37E-06 | CHCHD2     |
| ENSG00000229422 | 38.53263601 | 0.743759607 | 5.740037885  | 9.98E-07 | 6.43E-06 | AL512625.2 |
| ENSG00000175564 | 66.94776485 | 12.08681174 | 2.464531479  | 1.02E-06 | 6.55E-06 | UCP3       |
| ENSG00000155970 | 319.664985  | 139.8266905 | 1.193482601  | 1.02E-06 | 6.56E-06 | MICU3      |
| ENSG00000163430 | 9185.520017 | 26274.47872 | -1.516245236 | 1.02E-06 | 6.58E-06 | FSTL1      |
| ENSG00000187105 | 61.68927451 | 7.489631017 | 3.038526461  | 1.02E-06 | 6.59E-06 | HEATR4     |
| ENSG00000074370 | 242.5403906 | 29.48002942 | 3.044999126  | 1.03E-06 | 6.63E-06 | ATP2A3     |
| ENSG00000005981 | 45.02175793 | 0.672939833 | 5.987409509  | 1.03E-06 | 6.64E-06 | ASB4       |
| ENSG00000132646 | 888.5096917 | 2853.692775 | -1.683510922 | 1.04E-06 | 6.66E-06 | PCNA       |
| ENSG00000087301 | 279.0543328 | 99.22210447 | 1.489545201  | 1.04E-06 | 6.67E-06 | TXNDC16    |
| ENSG00000183066 | 51.61320903 | 7.683177117 | 2.761809994  | 1.04E-06 | 6.68E-06 | WBP2NL     |
| ENSG00000233369 | 1001.51928  | 307.5607349 | 1.70423878   | 1.04E-06 | 6.71E-06 | GTF2IP4    |
| ENSG00000277443 | 15763.56907 | 4070.092326 | 1.953389135  | 1.05E-06 | 6.72E-06 | MARCKS     |
| ENSG00000085265 | 26.54464996 | 0           | 7.064430112  | 1.05E-06 | 6.73E-06 | FCN1       |
| ENSG00000182872 | 983.6216574 | 1730.416062 | -0.81490751  | 1.05E-06 | 6.74E-06 | RBM10      |
| ENSG00000285894 | 48.52284011 | 1.080229524 | 5.492173325  | 1.05E-06 | 6.74E-06 | AL136372.2 |
| ENSG00000121671 | 670.9598477 | 269.0749755 | 1.31856262   | 1.05E-06 | 6.76E-06 | CRY2       |
| ENSG00000108798 | 440.8666211 | 31.28138092 | 3.822241375  | 1.06E-06 | 6.82E-06 | ABI3       |
| ENSG00000154310 | 104.813428  | 13.42207892 | 2.958396572  | 1.06E-06 | 6.82E-06 | TNIK       |
| ENSG00000115649 | 1542.930541 | 667.5219083 | 1.208812786  | 1.07E-06 | 6.84E-06 | CNPPD1     |
| ENSG00000162458 | 233.5048714 | 1853.573596 | -2.988880172 | 1.07E-06 | 6.84E-06 | FBLIM1     |
| ENSG00000116120 | 654.804065  | 1845.477591 | -1.495038631 | 1.07E-06 | 6.88E-06 | FARSB      |
| ENSG00000244486 | 708.2593731 | 2092.283431 | -1.562937331 | 1.08E-06 | 6.89E-06 | SCARF2     |
| ENSG00000228252 | 26.56269959 | 0           | 7.064302078  | 1.08E-06 | 6.92E-06 | COL6A4P2   |
| ENSG00000198768 | 2.46684723  | 671.6856215 | -8.093367156 | 1.08E-06 | 6.93E-06 | APCDD1L    |
| ENSG00000182685 | 237.1009914 | 85.39479082 | 1.473400643  | 1.08E-06 | 6.93E-06 | BRICD5     |
| ENSG00000006125 | 2643.376315 | 5527.179126 | -1.064211617 | 1.08E-06 | 6.93E-06 | AP2B1      |
| ENSG00000172137 | 34.48904929 | 0.387220594 | 6.480111711  | 1.09E-06 | 6.95E-06 | CALB2      |
| ENSG00000272343 | 43.98615496 | 3.342189926 | 3.746586029  | 1.09E-06 | 6.99E-06 | AC107952.2 |
| ENSG00000178075 | 28.25910588 | 105.0007121 | -1.894244478 | 1.09E-06 | 7.01E-06 | GRAMD1C    |
| ENSG00000196177 | 759.2181505 | 273.3719714 | 1.473398308  | 1.10E-06 | 7.01E-06 | ACADSB     |
| ENSG00000131873 | 701.6548438 | 1652.167917 | -1.235637502 | 1.10E-06 | 7.06E-06 | CHSY1      |
| ENSG00000000419 | 467.4819027 | 1039.582758 | -1.153159045 | 1.11E-06 | 7.12E-06 | DPM1       |
| ENSG00000177839 | 40.24820304 | 0.713078025 | 5.810117829  | 1.11E-06 | 7.13E-06 | PCDHB9     |
| ENSG00000140279 | 46.97623163 | 0.387220594 | 6.926502831  | 1.12E-06 | 7.16E-06 | DUOX2      |
| ENSG00000148926 | 707.5042259 | 8808.18654  | -3.638096885 | 1.13E-06 | 7.19E-06 | ADM        |
| ENSG00000119862 | 419.8425464 | 33.37183774 | 3.648337193  | 1.13E-06 | 7.19E-06 | LGALS1     |
| ENSG00000204673 | 992.3476807 | 1995.682357 | -1.007986945 | 1.13E-06 | 7.20E-06 | AKT1S1     |
| ENSG00000272010 | 55.94405309 | 10.02900992 | 2.478941503  | 1.13E-06 | 7.21E-06 | AC100814.1 |
| ENSG00000259803 | 10.57590252 | 153.1149514 | -3.854370911 | 1.13E-06 | 7.21E-06 | SLC22A31   |
| ENSG00000184378 | 18.9343206  | 94.08403845 | -2.316598468 | 1.13E-06 | 7.23E-06 | ACTRT3     |
| ENSG00000185359 | 1125.538473 | 2654.129368 | -1.237497324 | 1.13E-06 | 7.24E-06 | HGS        |
| ENSG00000185551 | 5550.059759 | 2601.046677 | 1.093297077  | 1.14E-06 | 7.26E-06 | NR2F2      |
| ENSG00000110042 | 1462.198538 | 168.1449641 | 3.121405699  | 1.14E-06 | 7.27E-06 | DTX4       |
| ENSG00000237248 | 36.15640784 | 0.387220594 | 6.548666329  | 1.15E-06 | 7.31E-06 | LINC00987  |
| ENSG00000225342 | 35.78293312 | 3.607840069 | 3.314833028  | 1.15E-06 | 7.36E-06 | AC079630.1 |
| ENSG00000115415 | 2675.160861 | 7682.77029  | -1.522051279 | 1.16E-06 | 7.36E-06 | STAT1      |
| ENSG00000182168 | 88.96370596 | 1.702418679 | 5.670291906  | 1.16E-06 | 7.42E-06 | UNC5C      |



|                 |             |             |              |          |          |            |
|-----------------|-------------|-------------|--------------|----------|----------|------------|
| ENSG00000139547 | 37.71874429 | 2.92428775  | 3.704869905  | 1.17E-06 | 7.42E-06 | RDH16      |
| ENSG00000157856 | 46.28046833 | 0.743759607 | 6.001475912  | 1.17E-06 | 7.44E-06 | DRC1       |
| ENSG00000136928 | 8.237497632 | 53.52378171 | -2.703140353 | 1.17E-06 | 7.44E-06 | GABBR2     |
| ENSG00000136840 | 222.5710376 | 778.6102612 | -1.806949916 | 1.17E-06 | 7.44E-06 | ST6GALNAC4 |
| ENSG00000221995 | 118.3608594 | 37.40202791 | 1.65908585   | 1.18E-06 | 7.48E-06 | TIAF1      |
| ENSG00000158125 | 0           | 25.93355251 | -7.274908319 | 1.18E-06 | 7.50E-06 | XDH        |
| ENSG00000011332 | 11.94027577 | 103.8919844 | -3.1243746   | 1.18E-06 | 7.50E-06 | DPF1       |
| ENSG00000108788 | 583.9271953 | 1173.056448 | -1.006426354 | 1.19E-06 | 7.55E-06 | MLX        |
| ENSG00000081041 | 57.05655591 | 929.582555  | -4.026091171 | 1.20E-06 | 7.62E-06 | CXCL2      |
| ENSG00000100697 | 2554.974602 | 798.0718113 | 1.678682491  | 1.20E-06 | 7.62E-06 | DICER1     |
| ENSG00000054277 | 89.94490418 | 231.6411101 | -1.364167817 | 1.20E-06 | 7.62E-06 | OPN3       |
| ENSG00000108039 | 806.2493683 | 1642.219954 | -1.026290114 | 1.21E-06 | 7.68E-06 | XPNPEP1    |
| ENSG00000226891 | 37.48156198 | 1.773238453 | 4.390920139  | 1.21E-06 | 7.68E-06 | LINC01359  |
| novel.377       | 7.974202162 | 140.1726642 | -4.128769922 | 1.21E-06 | 7.70E-06 | -          |
| novel.21        | 33.69554412 | 0           | 7.409071321  | 1.22E-06 | 7.72E-06 | -          |
| ENSG00000162896 | 21.84659943 | 0           | 6.782776169  | 1.22E-06 | 7.72E-06 | PIGR       |
| ENSG00000011376 | 304.6213327 | 865.1080257 | -1.506367158 | 1.22E-06 | 7.72E-06 | LARS2      |
| ENSG00000166225 | 887.8792943 | 291.2046542 | 1.608265996  | 1.22E-06 | 7.74E-06 | FRS2       |
| ENSG00000023892 | 695.0937647 | 137.9398912 | 2.331438667  | 1.22E-06 | 7.75E-06 | DEF6       |
| ENSG00000277587 | 22.47584772 | 0           | 6.823630956  | 1.22E-06 | 7.75E-06 | AC008759.3 |
| ENSG00000167881 | 1269.795642 | 2413.615263 | -0.926714991 | 1.23E-06 | 7.80E-06 | SRP68      |
| ENSG00000145740 | 685.7970036 | 1240.187751 | -0.854588237 | 1.24E-06 | 7.83E-06 | SLC30A5    |
| ENSG00000170689 | 0.307102255 | 30.89916901 | -6.56690444  | 1.24E-06 | 7.84E-06 | HOXB9      |
| ENSG00000175262 | 26.47834877 | 0           | 7.060018282  | 1.25E-06 | 7.91E-06 | C1orf127   |
| ENSG00000231969 | 43.92025287 | 0.387220594 | 6.829649033  | 1.25E-06 | 7.92E-06 | AC007364.1 |
| ENSG00000072858 | 45.476748   | 1.702418679 | 4.690549233  | 1.25E-06 | 7.94E-06 | SIDT1      |
| ENSG00000177951 | 650.857464  | 1495.854518 | -1.200686345 | 1.26E-06 | 7.94E-06 | BET1L      |
| ENSG00000164163 | 952.1639846 | 2296.063195 | -1.269972228 | 1.26E-06 | 7.96E-06 | ABCE1      |
| ENSG00000113282 | 924.0698741 | 1862.421647 | -1.011187509 | 1.26E-06 | 7.97E-06 | CLINT1     |
| novel.887       | 360.2406031 | 0           | 10.82650823  | 1.26E-06 | 7.98E-06 | -          |
| ENSG00000158683 | 71.15206096 | 6.317228354 | 3.512023686  | 1.26E-06 | 7.98E-06 | PKD1L1     |
| ENSG00000144959 | 148.1113847 | 473.2594174 | -1.676454675 | 1.27E-06 | 8.00E-06 | NCEH1      |
| ENSG00000196812 | 68.14078662 | 15.41954506 | 2.144057733  | 1.27E-06 | 8.01E-06 | ZSCAN16    |
| ENSG00000126353 | 18.23311543 | 191.3102053 | -3.391250647 | 1.27E-06 | 8.01E-06 | CCR7       |
| ENSG00000186866 | 785.2782764 | 1969.53591  | -1.326368061 | 1.27E-06 | 8.02E-06 | POFUT2     |
| ENSG00000237061 | 26.12429169 | 0           | 7.041817299  | 1.28E-06 | 8.06E-06 | AC100823.1 |
| ENSG00000287306 | 51.09707456 | 0.713078025 | 6.155225398  | 1.28E-06 | 8.08E-06 | AC016821.1 |
| ENSG00000212232 | 3.915429114 | 35.95464689 | -3.19649458  | 1.30E-06 | 8.19E-06 | SNORD17    |
| ENSG00000259236 | 59.66130555 | 5.361009426 | 3.474603509  | 1.30E-06 | 8.19E-06 | GOLGA8VP   |
| ENSG00000138115 | 30.30824433 | 0           | 7.254635428  | 1.31E-06 | 8.25E-06 | CYP2C8     |
| ENSG00000148488 | 98.14292509 | 5.290189653 | 4.205351192  | 1.31E-06 | 8.28E-06 | ST8SIA6    |
| ENSG00000233608 | 72.34543838 | 631.743748  | -3.126930664 | 1.31E-06 | 8.29E-06 | TWIST2     |
| ENSG00000244306 | 57.84644232 | 0           | 8.187555445  | 1.32E-06 | 8.29E-06 | DUXAP10    |
| ENSG00000169908 | 1070.197432 | 5977.80922  | -2.48181112  | 1.32E-06 | 8.33E-06 | TM4SF1     |
| ENSG00000163071 | 762.2542511 | 226.9613881 | 1.746872911  | 1.32E-06 | 8.33E-06 | SPATA18    |
| ENSG00000138111 | 165.8043329 | 63.82571503 | 1.377279671  | 1.33E-06 | 8.35E-06 | MFSD13A    |
| ENSG00000184898 | 571.4422637 | 158.8160393 | 1.845465144  | 1.33E-06 | 8.35E-06 | RBM43      |
| ENSG00000069011 | 0.925067711 | 34.83286651 | -5.253061842 | 1.33E-06 | 8.35E-06 | PITX1      |
| ENSG00000143641 | 2387.352891 | 4425.212317 | -0.890324139 | 1.33E-06 | 8.39E-06 | GALNT2     |
| ENSG00000172115 | 1539.141129 | 3796.085167 | -1.302489606 | 1.34E-06 | 8.41E-06 | CYCS       |
| ENSG00000099364 | 421.5266304 | 1047.54084  | -1.312983443 | 1.35E-06 | 8.46E-06 | FBXL19     |

|                 |             |             |              |          |          |            |
|-----------------|-------------|-------------|--------------|----------|----------|------------|
| ENSG00000127472 | 46.23834212 | 0.387220594 | 6.902308332  | 1.36E-06 | 8.53E-06 | PLA2G5     |
| ENSG00000047315 | 1048.579561 | 2050.401046 | -0.967367723 | 1.36E-06 | 8.54E-06 | POLR2B     |
| ENSG00000132376 | 892.091922  | 375.9575851 | 1.245891405  | 1.36E-06 | 8.55E-06 | INPP5K     |
| ENSG00000166473 | 54.62305935 | 0.713078025 | 6.251904694  | 1.36E-06 | 8.56E-06 | PKD1L2     |
| ENSG00000077420 | 1000.316883 | 63.62176638 | 3.977120525  | 1.38E-06 | 8.67E-06 | APBB1IP    |
| ENSG00000166670 | 0           | 24.52083428 | -7.199647678 | 1.38E-06 | 8.67E-06 | MMP10      |
| ENSG00000157837 | 1200.099914 | 628.4008942 | 0.933613191  | 1.39E-06 | 8.70E-06 | SPPL3      |
| ENSG00000101695 | 264.4566111 | 37.49137572 | 2.822120742  | 1.39E-06 | 8.74E-06 | RNF125     |
| novel.155       | 130.9722959 | 27.39180281 | 2.259319783  | 1.39E-06 | 8.75E-06 | -          |
| ENSG00000120051 | 10.68546886 | 67.69535244 | -2.665662169 | 1.40E-06 | 8.77E-06 | CFAP58     |
| ENSG00000130202 | 1536.087085 | 4159.192983 | -1.437077368 | 1.40E-06 | 8.77E-06 | NECTIN2    |
| novel.893       | 128.7781455 | 4.485066883 | 4.827024215  | 1.40E-06 | 8.79E-06 | -          |
| ENSG00000149923 | 1261.694123 | 3028.225173 | -1.263009144 | 1.40E-06 | 8.79E-06 | PPP4C      |
| ENSG00000165929 | 25.32286519 | 0           | 6.995374661  | 1.40E-06 | 8.80E-06 | TC2N       |
| ENSG00000188290 | 380.5246395 | 152.9280491 | 1.313388682  | 1.40E-06 | 8.80E-06 | HES4       |
| ENSG00000017427 | 21.89946649 | 0           | 6.785955663  | 1.41E-06 | 8.83E-06 | IGF1       |
| ENSG00000070526 | 24.06938319 | 0           | 6.922201325  | 1.43E-06 | 8.97E-06 | ST6GALNAC1 |
| ENSG00000107130 | 805.6131964 | 2666.345649 | -1.72664777  | 1.43E-06 | 8.97E-06 | NCS1       |
| ENSG00000234186 | 22.85447958 | 0           | 6.848952886  | 1.44E-06 | 8.99E-06 | C16orf82   |
| ENSG00000159433 | 3231.757815 | 402.8687655 | 3.004215948  | 1.44E-06 | 9.00E-06 | STARD9     |
| novel.555       | 2.71348926  | 137.3149708 | -5.660157722 | 1.44E-06 | 9.00E-06 | -          |
| ENSG00000164961 | 640.7602728 | 1185.155482 | -0.887247091 | 1.44E-06 | 9.00E-06 | WASHC5     |
| ENSG00000256771 | 166.1042692 | 63.78326509 | 1.380270474  | 1.45E-06 | 9.06E-06 | ZNF253     |
| ENSG00000106479 | 718.2849689 | 245.6741234 | 1.547767504  | 1.45E-06 | 9.07E-06 | ZNF862     |
| ENSG00000213366 | 671.9143511 | 187.2061601 | 1.844891165  | 1.46E-06 | 9.14E-06 | GSTM2      |
| ENSG00000160789 | 7719.325209 | 19393.24448 | -1.328999086 | 1.46E-06 | 9.15E-06 | LMNA       |
| ENSG00000189050 | 266.1909272 | 99.5525854  | 1.416719527  | 1.46E-06 | 9.15E-06 | RNFT1      |
| novel.265       | 141.8589472 | 30.16871882 | 2.226370417  | 1.47E-06 | 9.17E-06 | -          |
| ENSG00000174953 | 330.7839181 | 668.0684782 | -1.014477629 | 1.47E-06 | 9.21E-06 | DHX36      |
| ENSG00000155897 | 0           | 56.41682713 | -8.398153134 | 1.48E-06 | 9.25E-06 | ADCY8      |
| ENSG00000171847 | 36.20189555 | 1.10029862  | 5.064429134  | 1.48E-06 | 9.25E-06 | FAM90A1    |
| ENSG00000076248 | 311.5987958 | 779.99642   | -1.324120354 | 1.49E-06 | 9.30E-06 | UNG        |
| ENSG00000102524 | 339.2113428 | 59.33033964 | 2.512357247  | 1.49E-06 | 9.32E-06 | TNFSF13B   |
| ENSG00000001626 | 22.00881936 | 0           | 6.794290475  | 1.51E-06 | 9.42E-06 | CFTR       |
| ENSG00000124942 | 72461.71733 | 24279.62386 | 1.577466961  | 1.51E-06 | 9.42E-06 | AHNAK      |
| ENSG00000131089 | 557.3473997 | 288.1983394 | 0.951661423  | 1.51E-06 | 9.43E-06 | ARHGEF9    |
| ENSG00000130988 | 53.89319028 | 1.844058227 | 4.890685457  | 1.52E-06 | 9.49E-06 | RGN        |
| ENSG00000163950 | 639.556538  | 1543.891682 | -1.271682632 | 1.52E-06 | 9.49E-06 | SLBP       |
| ENSG00000197345 | 546.5368225 | 1049.350355 | -0.941179247 | 1.54E-06 | 9.59E-06 | MRPL21     |
| ENSG00000077458 | 827.5324121 | 275.6689329 | 1.586104026  | 1.55E-06 | 9.63E-06 | FAM76B     |
| ENSG00000213468 | 44.26449422 | 6.24640858  | 2.842799786  | 1.55E-06 | 9.65E-06 | FIRRE      |
| ENSG00000158717 | 878.1787517 | 383.4364752 | 1.194786165  | 1.56E-06 | 9.72E-06 | RNF166     |
| ENSG00000250748 | 2.124500267 | 36.26488315 | -4.092816967 | 1.56E-06 | 9.72E-06 | AC025419.1 |
| ENSG00000278126 | 53.11745001 | 9.906283597 | 2.412442256  | 1.56E-06 | 9.72E-06 | AC139768.2 |
| ENSG00000164144 | 1521.424124 | 715.5176118 | 1.088398941  | 1.57E-06 | 9.78E-06 | ARFIP1     |
| ENSG00000157224 | 409.6902221 | 1193.063713 | -1.541857047 | 1.58E-06 | 9.80E-06 | CLDN12     |
| ENSG00000182575 | 92.00582367 | 10.27215083 | 3.171848472  | 1.58E-06 | 9.85E-06 | NXPH3      |
| ENSG00000018699 | 196.8004195 | 505.6421716 | -1.362024441 | 1.59E-06 | 9.88E-06 | TTC27      |
| ENSG00000181291 | 50.90408252 | 0.387220594 | 7.041080257  | 1.59E-06 | 9.88E-06 | TMEM132E   |
| ENSG00000180447 | 85.03746508 | 694.9054819 | -3.03090225  | 1.59E-06 | 9.90E-06 | GAS1       |
| ENSG00000214402 | 126.1468978 | 2.893606169 | 5.449226034  | 1.60E-06 | 9.96E-06 | LCNL1      |

|                 |             |             |              |          |          |            |
|-----------------|-------------|-------------|--------------|----------|----------|------------|
| ENSG00000272927 | 35.98791966 | 0.774441189 | 5.632746444  | 1.61E-06 | 9.97E-06 | AC107464.3 |
| ENSG00000156990 | 379.7659521 | 778.8601746 | -1.036062546 | 1.61E-06 | 1.00E-05 | RPUSD3     |
| ENSG00000101331 | 41.78281667 | 0.672939833 | 5.878235053  | 1.61E-06 | 1.00E-05 | CCM2L      |
| ENSG00000237489 | 95.37968933 | 22.6247411  | 2.068496482  | 1.62E-06 | 1.00E-05 | C10orf143  |
| ENSG00000261253 | 0.586481695 | 47.01501504 | -6.287748617 | 1.62E-06 | 1.01E-05 | AC137932.2 |
| novel.1029      | 0           | 30.12272004 | -7.496328762 | 1.63E-06 | 1.01E-05 | -          |
| novel.115       | 30.25473653 | 0           | 7.253515057  | 1.63E-06 | 1.01E-05 | -          |
| ENSG00000137872 | 692.0148144 | 41.25604414 | 4.07125954   | 1.63E-06 | 1.01E-05 | SEMA6D     |
| ENSG00000197406 | 55.97012281 | 0           | 8.139989426  | 1.64E-06 | 1.01E-05 | DIO3       |
| ENSG00000099800 | 792.4544692 | 1936.93957  | -1.289540174 | 1.64E-06 | 1.02E-05 | TIMM13     |
| ENSG00000136936 | 376.6788025 | 175.5284831 | 1.102046531  | 1.64E-06 | 1.02E-05 | XPA        |
| ENSG00000122642 | 2043.500759 | 4930.833147 | -1.270861108 | 1.65E-06 | 1.02E-05 | FKBP9      |
| ENSG00000128829 | 1332.802422 | 2624.671753 | -0.977540792 | 1.66E-06 | 1.03E-05 | EIF2AK4    |
| ENSG00000133657 | 1432.342771 | 6437.361051 | -2.168056864 | 1.66E-06 | 1.03E-05 | ATP13A3    |
| ENSG00000156052 | 2057.034189 | 1032.597024 | 0.994086266  | 1.67E-06 | 1.03E-05 | GNAQ       |
| ENSG00000180479 | 112.3600782 | 30.28540898 | 1.893479319  | 1.67E-06 | 1.03E-05 | ZNF571     |
| ENSG00000100138 | 1411.90663  | 2883.839248 | -1.030356434 | 1.67E-06 | 1.03E-05 | SNU13      |
| ENSG00000100266 | 1011.180867 | 2032.381928 | -1.007093564 | 1.67E-06 | 1.03E-05 | PACCSIN2   |
| ENSG00000134339 | 0.308355904 | 614.8916006 | -10.88347714 | 1.67E-06 | 1.04E-05 | SAA2       |
| ENSG00000119771 | 1084.484672 | 276.0619672 | 1.974794398  | 1.68E-06 | 1.04E-05 | KLHL29     |
| ENSG00000220563 | 40.91806699 | 1.049547942 | 5.256980157  | 1.69E-06 | 1.04E-05 | PKMP3      |
| ENSG00000178301 | 140.4169618 | 22.74990757 | 2.618841028  | 1.69E-06 | 1.04E-05 | AQP11      |
| ENSG00000100767 | 1226.636482 | 178.370662  | 2.780655672  | 1.70E-06 | 1.05E-05 | PAPLN      |
| ENSG00000111339 | 832.8814274 | 1.813376645 | 8.846011632  | 1.71E-06 | 1.05E-05 | ART4       |
| ENSG00000198467 | 4136.997201 | 14886.17065 | -1.847321842 | 1.71E-06 | 1.05E-05 | TPM2       |
| ENSG00000136160 | 2926.682342 | 171.9877509 | 4.088163321  | 1.72E-06 | 1.06E-05 | EDNRB      |
| ENSG00000142961 | 624.5587875 | 274.9259912 | 1.184131076  | 1.73E-06 | 1.07E-05 | MOB3C      |
| ENSG00000131094 | 86.84547499 | 10.54854185 | 3.032153745  | 1.73E-06 | 1.07E-05 | C1QL1      |
| ENSG00000236675 | 5.659759143 | 54.01147618 | -3.244857453 | 1.74E-06 | 1.07E-05 | MTX1P1     |
| ENSG00000261390 | 23.69917087 | 0           | 6.900131488  | 1.74E-06 | 1.08E-05 | MAFTRR     |
| ENSG00000158710 | 4949.623086 | 11894.44528 | -1.264893841 | 1.76E-06 | 1.09E-05 | TAGLN2     |
| ENSG00000224592 | 35.33617661 | 0.387220594 | 6.514383648  | 1.76E-06 | 1.09E-05 | AL139158.2 |
| ENSG00000146263 | 121.6142315 | 373.4542345 | -1.618894207 | 1.77E-06 | 1.09E-05 | MMS22L     |
| ENSG00000130649 | 50.51101979 | 7.938214774 | 2.67255184   | 1.78E-06 | 1.09E-05 | CYP2E1     |
| ENSG00000135999 | 598.1017087 | 275.9278705 | 1.115328644  | 1.78E-06 | 1.10E-05 | EPC2       |
| novel.670       | 604.4221337 | 0           | 11.57309835  | 1.78E-06 | 1.10E-05 | -          |
| ENSG00000126218 | 256.8169916 | 58.50728395 | 2.132707431  | 1.79E-06 | 1.10E-05 | F10        |
| ENSG00000148396 | 1420.075634 | 2954.202967 | -1.056707107 | 1.79E-06 | 1.10E-05 | SEC16A     |
| ENSG00000112118 | 795.2208404 | 2026.462373 | -1.349715957 | 1.79E-06 | 1.10E-05 | MCM3       |
| ENSG00000099821 | 1078.641449 | 1936.064196 | -0.843961749 | 1.79E-06 | 1.10E-05 | POLRMT     |
| ENSG00000181722 | 87.39041555 | 12.12579406 | 2.846877654  | 1.80E-06 | 1.11E-05 | ZBTB20     |
| ENSG00000235944 | 72.83585949 | 16.33691006 | 2.150372629  | 1.80E-06 | 1.11E-05 | ZNF815P    |
| ENSG00000173175 | 133.9032918 | 7.14370449  | 4.226372919  | 1.80E-06 | 1.11E-05 | ADCY5      |
| ENSG00000155957 | 601.9108885 | 182.0082377 | 1.724389219  | 1.81E-06 | 1.11E-05 | TMBIM4     |
| ENSG00000120645 | 142.5037646 | 2.893606169 | 5.624942615  | 1.81E-06 | 1.11E-05 | IQSEC3     |
| ENSG00000130307 | 50.82919142 | 7.04335901  | 2.838738595  | 1.81E-06 | 1.11E-05 | USHBP1     |
| ENSG00000140931 | 2633.447628 | 1304.711998 | 1.013409501  | 1.81E-06 | 1.11E-05 | CMTM3      |
| ENSG00000234511 | 51.69634965 | 0           | 8.026318346  | 1.81E-06 | 1.11E-05 | C5orf58    |
| ENSG00000223519 | 69.74600438 | 2.762579107 | 4.633896705  | 1.82E-06 | 1.12E-05 | KIF28P     |
| ENSG00000231113 | 104.4495987 | 27.88052476 | 1.909580669  | 1.82E-06 | 1.12E-05 | AL035587.1 |
| ENSG00000075292 | 2818.547254 | 1390.12172  | 1.019817083  | 1.82E-06 | 1.12E-05 | ZNF638     |

|                 |             |             |              |          |          |            |
|-----------------|-------------|-------------|--------------|----------|----------|------------|
| ENSG00000145687 | 859.1820334 | 252.8803938 | 1.763391572  | 1.84E-06 | 1.13E-05 | SSBP2      |
| ENSG00000269514 | 47.75795541 | 2.11916498  | 4.480539436  | 1.84E-06 | 1.13E-05 | AC024257.3 |
| ENSG00000286293 | 42.9369475  | 0           | 7.758619651  | 1.84E-06 | 1.13E-05 | AP005901.5 |
| ENSG00000144895 | 978.5041452 | 1823.093453 | -0.897708579 | 1.84E-06 | 1.13E-05 | EIF2A      |
| ENSG00000128016 | 6548.995085 | 1074.643614 | 2.607280846  | 1.85E-06 | 1.13E-05 | ZFP36      |
| ENSG00000168763 | 714.6711998 | 255.1975532 | 1.485837734  | 1.85E-06 | 1.14E-05 | CNNM3      |
| ENSG00000168350 | 30.25383889 | 0.356539013 | 6.291106905  | 1.86E-06 | 1.14E-05 | DEGS2      |
| ENSG00000095464 | 37.34455756 | 3.251301057 | 3.52871057   | 1.86E-06 | 1.14E-05 | PDE6C      |
| ENSG00000105835 | 1023.5123   | 11353.12691 | -3.471467813 | 1.86E-06 | 1.14E-05 | NAMPT      |
| novel.727       | 34.48278104 | 0.356539013 | 6.479853957  | 1.87E-06 | 1.14E-05 | -          |
| ENSG00000003147 | 93.04558703 | 7.26655921  | 3.66250299   | 1.87E-06 | 1.15E-05 | ICA1       |
| ENSG00000175029 | 671.3774863 | 1245.791319 | -0.892055731 | 1.88E-06 | 1.15E-05 | CTBP2      |
| novel.45        | 34.1951677  | 0           | 7.430357242  | 1.88E-06 | 1.15E-05 | -          |
| ENSG00000055070 | 2045.561539 | 3934.7161   | -0.943727851 | 1.89E-06 | 1.16E-05 | SZRD1      |
| ENSG00000178802 | 578.7926312 | 1252.766834 | -1.113715277 | 1.89E-06 | 1.16E-05 | MPI        |
| ENSG00000214174 | 450.1285536 | 105.5173843 | 2.090417104  | 1.91E-06 | 1.17E-05 | AMZ2P1     |
| ENSG00000245750 | 57.95082439 | 1.345879667 | 5.372979648  | 1.91E-06 | 1.17E-05 | DRAIC      |
| ENSG00000183258 | 1177.810632 | 2774.380922 | -1.23592785  | 1.91E-06 | 1.17E-05 | DDX41      |
| ENSG00000225434 | 101.2288218 | 6.337425844 | 3.988994157  | 1.91E-06 | 1.17E-05 | LINC01504  |
| ENSG00000185271 | 55.28317849 | 5.247611316 | 3.425196003  | 1.92E-06 | 1.17E-05 | KLHL33     |
| ENSG00000164040 | 1185.662573 | 2499.794093 | -1.076259602 | 1.93E-06 | 1.18E-05 | PGRMC2     |
| ENSG00000196116 | 562.4745851 | 160.4156723 | 1.80833202   | 1.93E-06 | 1.18E-05 | TDRD7      |
| ENSG00000134049 | 428.0157798 | 998.6523144 | -1.222409962 | 1.94E-06 | 1.18E-05 | IER3IP1    |
| ENSG00000184470 | 2499.343449 | 830.5298464 | 1.589432977  | 1.94E-06 | 1.18E-05 | TXNRD2     |
| ENSG00000257501 | 29.09878258 | 0           | 7.195852015  | 1.94E-06 | 1.19E-05 | AC007424.1 |
| ENSG00000169418 | 39.09196436 | 2.140389951 | 4.184794282  | 1.95E-06 | 1.19E-05 | NPR1       |
| ENSG00000179133 | 65.75083959 | 8.022087178 | 3.019649401  | 1.95E-06 | 1.19E-05 | C10orf67   |
| ENSG00000177352 | 362.5577972 | 714.4571133 | -0.978560429 | 1.96E-06 | 1.19E-05 | CCDC71     |
| ENSG00000161944 | 38.47643493 | 0.356539013 | 6.637156761  | 1.97E-06 | 1.20E-05 | ASGR2      |
| ENSG00000127415 | 629.0517096 | 332.2374641 | 0.921154827  | 1.97E-06 | 1.20E-05 | IDUA       |
| ENSG00000267296 | 102.8073409 | 12.9320727  | 2.990704182  | 1.98E-06 | 1.20E-05 | CEBPA-DT   |
| ENSG00000221946 | 40.92613052 | 0.356539013 | 6.72783342   | 1.99E-06 | 1.21E-05 | FXYP7      |
| ENSG00000181847 | 45.48441208 | 0           | 7.840599901  | 1.99E-06 | 1.21E-05 | TIGIT      |
| ENSG00000104972 | 38.37460394 | 0           | 7.595270527  | 1.99E-06 | 1.21E-05 | LILRB1     |
| ENSG00000142864 | 3498.929805 | 9142.749516 | -1.385763758 | 2.01E-06 | 1.23E-05 | SERBP1     |
| ENSG00000125868 | 2313.46881  | 6752.456039 | -1.545406827 | 2.02E-06 | 1.23E-05 | DSTN       |
| ENSG00000087008 | 206.1447646 | 473.8695689 | -1.200289361 | 2.05E-06 | 1.25E-05 | ACOX3      |
| ENSG00000171840 | 83.22948299 | 3.068367442 | 4.731903723  | 2.06E-06 | 1.26E-05 | NINJ2      |
| ENSG00000115091 | 2670.232755 | 5753.261139 | -1.107462675 | 2.07E-06 | 1.26E-05 | ACTR3      |
| ENSG00000225756 | 76.5432253  | 10.00662908 | 2.933374777  | 2.07E-06 | 1.26E-05 | DBH-AS1    |
| ENSG00000138755 | 215.5182409 | 0           | 10.08533103  | 2.08E-06 | 1.26E-05 | CXCL9      |
| ENSG00000164949 | 440.2741712 | 127.7369251 | 1.787260698  | 2.08E-06 | 1.26E-05 | GEM        |
| ENSG00000170382 | 26.92009034 | 0           | 7.083556673  | 2.08E-06 | 1.27E-05 | LRRN2      |
| ENSG00000102393 | 395.6469438 | 790.122822  | -0.997701057 | 2.09E-06 | 1.27E-05 | GLA        |
| ENSG00000188603 | 31.30462818 | 1.080229524 | 4.861705849  | 2.09E-06 | 1.27E-05 | CLN3       |
| ENSG00000115896 | 90.04082258 | 13.646435   | 2.710794248  | 2.10E-06 | 1.28E-05 | PLCL1      |
| ENSG00000159399 | 649.9708179 | 2638.347814 | -2.021166759 | 2.10E-06 | 1.28E-05 | HK2        |
| ENSG00000136830 | 7193.468676 | 16805.90537 | -1.224200937 | 2.11E-06 | 1.28E-05 | FAM129B    |
| ENSG00000206561 | 75.46199208 | 19.8620336  | 1.929797708  | 2.11E-06 | 1.28E-05 | COLQ       |
| novel.191       | 22.20022923 | 0           | 6.805727801  | 2.12E-06 | 1.28E-05 | -          |
| ENSG00000179454 | 373.6035917 | 186.0332908 | 1.00658782   | 2.12E-06 | 1.29E-05 | KLHL28     |

|                 |             |             |              |          |          |            |
|-----------------|-------------|-------------|--------------|----------|----------|------------|
| ENSG00000122882 | 450.4304556 | 879.8317237 | -0.966233142 | 2.12E-06 | 1.29E-05 | ECD        |
| ENSG00000118402 | 86.23481761 | 231.7749154 | -1.426744592 | 2.13E-06 | 1.29E-05 | ELOVL4     |
| ENSG00000186496 | 72.01713881 | 12.28164211 | 2.540681189  | 2.14E-06 | 1.30E-05 | ZNF396     |
| ENSG00000111057 | 43.59896068 | 4115.926008 | -6.561084035 | 2.14E-06 | 1.30E-05 | KRT18      |
| ENSG00000272335 | 243.4301434 | 87.75619761 | 1.470153025  | 2.14E-06 | 1.30E-05 | AC093297.2 |
| ENSG00000130595 | 56.42941581 | 0.693008929 | 6.308532821  | 2.15E-06 | 1.30E-05 | TNNT3      |
| ENSG00000177674 | 547.9076768 | 1525.410655 | -1.47706038  | 2.15E-06 | 1.31E-05 | AGTRAP     |
| ENSG00000250451 | 0           | 18.25294394 | -6.771658998 | 2.16E-06 | 1.31E-05 | HOXC-AS1   |
| ENSG00000179772 | 211.2344237 | 5.84040316  | 5.163972475  | 2.16E-06 | 1.31E-05 | FOXS1      |
| ENSG00000162928 | 361.68742   | 662.4576498 | -0.873226126 | 2.17E-06 | 1.31E-05 | PEX13      |
| ENSG00000167196 | 514.2878512 | 1014.022298 | -0.979744502 | 2.17E-06 | 1.31E-05 | FBXO22     |
| ENSG00000158987 | 375.4171857 | 145.1595869 | 1.370038609  | 2.17E-06 | 1.31E-05 | RAPGEF6    |
| ENSG00000086827 | 237.6577412 | 526.0119216 | -1.146880598 | 2.18E-06 | 1.32E-05 | ZW10       |
| ENSG00000006695 | 140.9466295 | 298.7223642 | -1.084395109 | 2.19E-06 | 1.32E-05 | COX10      |
| ENSG00000163166 | 736.217404  | 1349.143959 | -0.874028443 | 2.21E-06 | 1.33E-05 | IWS1       |
| ENSG00000119689 | 1489.891428 | 2850.863598 | -0.936302835 | 2.22E-06 | 1.34E-05 | DLST       |
| ENSG00000248371 | 1.201939854 | 40.17825476 | -5.053109828 | 2.22E-06 | 1.34E-05 | LINC02056  |
| ENSG00000169715 | 1199.488123 | 4689.745354 | -1.966998731 | 2.22E-06 | 1.34E-05 | MT1E       |
| ENSG00000113615 | 494.2575387 | 1601.283261 | -1.695763075 | 2.23E-06 | 1.35E-05 | SEC24A     |
| ENSG00000111052 | 319.3441201 | 52.12655625 | 2.610717589  | 2.24E-06 | 1.35E-05 | LIN7A      |
| ENSG00000105220 | 1748.943866 | 4470.966167 | -1.354092242 | 2.24E-06 | 1.35E-05 | GPI        |
| ENSG00000181982 | 830.1872371 | 222.6461554 | 1.899314178  | 2.24E-06 | 1.35E-05 | CCDC149    |
| novel.1095      | 67.58560271 | 0.743759607 | 6.541040987  | 2.24E-06 | 1.35E-05 | -          |
| ENSG00000049247 | 19.91831015 | 0           | 6.650228068  | 2.25E-06 | 1.35E-05 | UTS2       |
| ENSG00000266865 | 94.31314424 | 17.50931272 | 2.419129827  | 2.25E-06 | 1.36E-05 | AC138207.8 |
| ENSG00000254415 | 37.13351624 | 0.672939833 | 5.706710624  | 2.26E-06 | 1.36E-05 | SIGLEC14   |
| ENSG00000114770 | 1555.531437 | 717.1683335 | 1.117055902  | 2.26E-06 | 1.36E-05 | ABCC5      |
| ENSG00000226476 | 43.80082771 | 0           | 7.786271477  | 2.26E-06 | 1.36E-05 | LINC01748  |
| ENSG00000105246 | 154.53922   | 26.34199808 | 2.561188349  | 2.26E-06 | 1.36E-05 | EBI3       |
| ENSG00000054179 | 200.499023  | 0           | 9.981122113  | 2.27E-06 | 1.37E-05 | ENTPD2     |
| ENSG00000260401 | 55.79146325 | 1.080229524 | 5.693236634  | 2.30E-06 | 1.38E-05 | AP002761.4 |
| ENSG00000110721 | 861.8459502 | 243.1643518 | 1.826330361  | 2.30E-06 | 1.39E-05 | CHKA       |
| ENSG00000188315 | 265.1046515 | 85.31361535 | 1.634024703  | 2.31E-06 | 1.39E-05 | C3orf62    |
| ENSG00000151388 | 107.8806177 | 1838.674138 | -4.091446058 | 2.31E-06 | 1.39E-05 | ADAMTS12   |
| ENSG00000137331 | 12.83106769 | 129.4652863 | -3.331828148 | 2.31E-06 | 1.39E-05 | IER3       |
| ENSG00000031081 | 1176.519868 | 595.703841  | 0.981424458  | 2.33E-06 | 1.40E-05 | ARHGAP31   |
| ENSG00000115310 | 5128.743199 | 10516.7549  | -1.036046841 | 2.34E-06 | 1.41E-05 | RTN4       |
| ENSG00000260597 | 0.308355904 | 39.51669778 | -6.925060573 | 2.34E-06 | 1.41E-05 | AC012531.1 |
| ENSG00000106404 | 342.6671114 | 99.62353357 | 1.780662039  | 2.35E-06 | 1.41E-05 | CLDN15     |
| ENSG00000226751 | 24.13485801 | 0           | 6.925944069  | 2.36E-06 | 1.42E-05 | AF127936.1 |
| ENSG00000180992 | 466.0829971 | 1077.049921 | -1.20850777  | 2.36E-06 | 1.42E-05 | MRPL14     |
| ENSG00000284727 | 38.21675821 | 0.672939833 | 5.750290886  | 2.36E-06 | 1.42E-05 | AC116562.4 |
| ENSG00000151348 | 1628.51461  | 3278.532132 | -1.00949182  | 2.38E-06 | 1.43E-05 | EXT2       |
| ENSG00000166477 | 315.4390762 | 737.9892489 | -1.226672893 | 2.38E-06 | 1.43E-05 | LEO1       |
| ENSG00000102452 | 436.346606  | 37.68098747 | 3.529794773  | 2.39E-06 | 1.44E-05 | NALCN      |
| ENSG00000128340 | 404.2944256 | 3300.179475 | -3.029116595 | 2.41E-06 | 1.45E-05 | RAC2       |
| ENSG00000007202 | 1609.687577 | 2870.385304 | -0.834520295 | 2.41E-06 | 1.45E-05 | KIAA0100   |
| ENSG00000004779 | 661.5439306 | 1532.400042 | -1.212103111 | 2.45E-06 | 1.47E-05 | NDUFAB1    |
| ENSG00000104356 | 115.9559395 | 348.0528813 | -1.586567764 | 2.46E-06 | 1.48E-05 | POP1       |
| ENSG00000124181 | 1323.585123 | 2549.5035   | -0.945624034 | 2.46E-06 | 1.48E-05 | PLCG1      |
| ENSG00000263874 | 156.2292155 | 41.76526755 | 1.90436395   | 2.46E-06 | 1.48E-05 | LINC00672  |

|                 |             |             |              |          |          |            |
|-----------------|-------------|-------------|--------------|----------|----------|------------|
| ENSG00000256940 | 0.308355904 | 29.85334548 | -6.520413171 | 2.46E-06 | 1.48E-05 | AP001453.2 |
| ENSG00000102572 | 380.9607528 | 1150.699947 | -1.594881419 | 2.47E-06 | 1.48E-05 | STK24      |
| ENSG00000114686 | 781.8269254 | 1778.258795 | -1.18575091  | 2.47E-06 | 1.48E-05 | MRPL3      |
| ENSG00000170873 | 318.8512629 | 886.3787235 | -1.475223024 | 2.48E-06 | 1.48E-05 | MTSS1      |
| ENSG00000184009 | 30900.71404 | 78259.62203 | -1.340631626 | 2.48E-06 | 1.49E-05 | ACTG1      |
| ENSG00000151465 | 680.4103831 | 1479.774807 | -1.121154864 | 2.49E-06 | 1.49E-05 | CDC123     |
| ENSG00000117528 | 1832.962759 | 910.0408718 | 1.010174104  | 2.49E-06 | 1.49E-05 | ABCD3      |
| ENSG00000238105 | 72.55801843 | 12.28981445 | 2.564574398  | 2.51E-06 | 1.50E-05 | GOLGA2P5   |
| ENSG00000155755 | 225.7338338 | 755.0362614 | -1.742414938 | 2.51E-06 | 1.50E-05 | TMEM237    |
| ENSG00000054983 | 1239.35639  | 500.6728175 | 1.307428209  | 2.53E-06 | 1.51E-05 | GALC       |
| ENSG00000101337 | 1044.150433 | 2253.039689 | -1.109424633 | 2.53E-06 | 1.51E-05 | TM9SF4     |
| ENSG00000106244 | 2587.765939 | 4719.853848 | -0.867017169 | 2.53E-06 | 1.51E-05 | PDAP1      |
| ENSG00000164830 | 1575.236564 | 592.9578506 | 1.40964006   | 2.56E-06 | 1.53E-05 | OXR1       |
| ENSG00000147421 | 483.9786097 | 231.8774442 | 1.062435872  | 2.57E-06 | 1.53E-05 | HMBOX1     |
| ENSG00000172974 | 206.5721035 | 478.5855076 | -1.212387597 | 2.58E-06 | 1.54E-05 | AC007318.1 |
| ENSG00000005073 | 5.534108833 | 122.1708708 | -4.470014516 | 2.60E-06 | 1.55E-05 | HOXA11     |
| ENSG00000224982 | 6.606281425 | 106.3361892 | -4.004800014 | 2.61E-06 | 1.56E-05 | TMEM233    |
| ENSG00000117602 | 569.1306999 | 161.2136374 | 1.821041278  | 2.61E-06 | 1.56E-05 | RCAN3      |
| ENSG00000277534 | 138.0373287 | 23.06399664 | 2.573793737  | 2.61E-06 | 1.56E-05 | AC007996.1 |
| ENSG00000240219 | 21.64780986 | 0           | 6.769078184  | 2.61E-06 | 1.56E-05 | AL512306.2 |
| ENSG00000113088 | 67.63979469 | 0.356539013 | 7.451387407  | 2.63E-06 | 1.57E-05 | GZMK       |
| ENSG00000272491 | 41.45376164 | 2.058957692 | 4.29274427   | 2.63E-06 | 1.57E-05 | AL109659.2 |
| ENSG00000268205 | 773.0582217 | 353.7033691 | 1.128569331  | 2.66E-06 | 1.59E-05 | AC005261.2 |
| ENSG00000261997 | 62.93724372 | 1.161661783 | 5.827016402  | 2.67E-06 | 1.59E-05 | AC007336.1 |
| ENSG00000135870 | 944.6029188 | 444.5296848 | 1.087515055  | 2.68E-06 | 1.60E-05 | RC3H1      |
| ENSG00000159147 | 229.1738584 | 524.7651031 | -1.195310141 | 2.68E-06 | 1.60E-05 | DONSON     |
| ENSG00000172270 | 6482.298299 | 15215.48868 | -1.230951915 | 2.69E-06 | 1.60E-05 | BSG        |
| ENSG00000160613 | 391.6609971 | 984.0508026 | -1.328970703 | 2.69E-06 | 1.60E-05 | PCSK7      |
| ENSG00000197121 | 575.3950888 | 263.4032971 | 1.126463482  | 2.69E-06 | 1.60E-05 | PGAP1      |
| novel.186       | 31.11851764 | 0.387220594 | 6.331918381  | 2.69E-06 | 1.60E-05 | -          |
| ENSG00000278817 | 50.69594795 | 8.836666559 | 2.509596232  | 2.70E-06 | 1.60E-05 | AC007325.4 |
| ENSG00000122483 | 102.143789  | 287.5071755 | -1.492767839 | 2.70E-06 | 1.61E-05 | CCDC18     |
| ENSG00000011009 | 698.1716419 | 1480.669056 | -1.084505634 | 2.71E-06 | 1.61E-05 | LYPLA2     |
| ENSG00000155465 | 424.5340283 | 97.60145638 | 2.123128208  | 2.71E-06 | 1.61E-05 | SLC7A7     |
| ENSG00000164066 | 593.023547  | 199.7612052 | 1.569753586  | 2.72E-06 | 1.62E-05 | INTU       |
| ENSG00000109814 | 597.3503416 | 1676.847125 | -1.489344856 | 2.75E-06 | 1.63E-05 | UGDH       |
| ENSG00000078369 | 5546.970858 | 10437.42476 | -0.912000226 | 2.75E-06 | 1.63E-05 | GNB1       |
| ENSG00000197479 | 26.31480391 | 0           | 7.050743747  | 2.75E-06 | 1.63E-05 | PCDHB11    |
| ENSG00000134294 | 5040.586032 | 17286.07983 | -1.777961499 | 2.75E-06 | 1.64E-05 | SLC38A2    |
| ENSG00000176165 | 0           | 22.10148476 | -7.044441799 | 2.75E-06 | 1.64E-05 | FOXG1      |
| ENSG00000151093 | 114.8280366 | 278.6185555 | -1.277669662 | 2.76E-06 | 1.64E-05 | OXSM       |
| ENSG00000164400 | 0.308355904 | 2337.391224 | -12.8099698  | 2.77E-06 | 1.64E-05 | CSF2       |
| ENSG00000185955 | 60.43718836 | 13.57548683 | 2.15207345   | 2.78E-06 | 1.65E-05 | C7orf61    |
| ENSG00000175573 | 712.9279768 | 2142.956456 | -1.587731337 | 2.78E-06 | 1.65E-05 | C11orf68   |
| ENSG00000147202 | 242.0760566 | 605.8329272 | -1.322859612 | 2.79E-06 | 1.65E-05 | DIAPH2     |
| ENSG00000216490 | 34.01561014 | 0.693008929 | 5.574258615  | 2.79E-06 | 1.66E-05 | IFI30      |
| ENSG00000232295 | 47.60200372 | 8.234546499 | 2.530459069  | 2.79E-06 | 1.66E-05 | AL589935.1 |
| ENSG00000134780 | 261.5254437 | 99.55844599 | 1.392304305  | 2.80E-06 | 1.66E-05 | DAGLA      |
| ENSG00000156931 | 823.7964815 | 391.2666729 | 1.074256087  | 2.83E-06 | 1.68E-05 | VPS8       |
| ENSG00000164690 | 862.6283073 | 2.0188195   | 8.721038075  | 2.85E-06 | 1.69E-05 | SHH        |
| ENSG00000100297 | 681.3863957 | 2195.195651 | -1.687943084 | 2.85E-06 | 1.69E-05 | MCM5       |

|                 |             |             |              |          |          |            |
|-----------------|-------------|-------------|--------------|----------|----------|------------|
| ENSG00000176946 | 642.8741748 | 1188.651769 | -0.886586477 | 2.87E-06 | 1.70E-05 | THAP4      |
| ENSG00000232160 | 75.09213577 | 18.11832086 | 2.056243552  | 2.88E-06 | 1.70E-05 | RAP2C-AS1  |
| ENSG00000268355 | 26.03750449 | 0           | 7.03625632   | 2.88E-06 | 1.70E-05 | AC243960.3 |
| ENSG00000163564 | 32.52726715 | 0           | 7.356648947  | 2.88E-06 | 1.71E-05 | PYHIN1     |
| ENSG00000179104 | 212.6584186 | 59.85200774 | 1.827434213  | 2.90E-06 | 1.72E-05 | TMTC2      |
| ENSG00000198015 | 681.1485577 | 1294.016563 | -0.925970109 | 2.90E-06 | 1.72E-05 | MRPL42     |
| ENSG00000183722 | 5062.21762  | 1009.268327 | 2.326227644  | 2.91E-06 | 1.72E-05 | LHFPL6     |
| ENSG00000240184 | 222.5729747 | 958.2372541 | -2.106252449 | 2.91E-06 | 1.72E-05 | PCDHGC3    |
| ENSG00000169021 | 882.9600263 | 1987.132728 | -1.170392284 | 2.91E-06 | 1.72E-05 | UQCRFS1    |
| ENSG00000136122 | 48.0475775  | 152.4496829 | -1.665920177 | 2.93E-06 | 1.73E-05 | BORA       |
| ENSG00000167767 | 4.266622888 | 49.26949226 | -3.536222181 | 2.93E-06 | 1.73E-05 | KRT80      |
| ENSG00000095574 | 583.7530524 | 229.9291877 | 1.34526883   | 2.94E-06 | 1.74E-05 | IKZF5      |
| ENSG00000186350 | 2073.963619 | 1090.272661 | 0.927835827  | 2.94E-06 | 1.74E-05 | RXRA       |
| ENSG00000140836 | 898.9623966 | 386.3060992 | 1.218618361  | 2.96E-06 | 1.75E-05 | ZFHX3      |
| ENSG00000145604 | 206.2997474 | 586.7599066 | -1.508592114 | 2.96E-06 | 1.75E-05 | SKP2       |
| novel.843       | 72.41682579 | 11.77028253 | 2.63307482   | 2.96E-06 | 1.75E-05 | -          |
| ENSG00000197635 | 88.44230069 | 1881.819795 | -4.41151853  | 2.96E-06 | 1.75E-05 | DPP4       |
| ENSG00000167191 | 571.3028622 | 47.14929979 | 3.596198026  | 2.97E-06 | 1.75E-05 | GPRC5B     |
| ENSG00000182195 | 471.9289811 | 1092.526355 | -1.210727445 | 2.97E-06 | 1.75E-05 | LDOC1      |
| ENSG00000108771 | 723.0022629 | 285.7944483 | 1.337914305  | 2.98E-06 | 1.76E-05 | DHX58      |
| ENSG00000151376 | 708.9137144 | 178.5201702 | 1.989598685  | 2.99E-06 | 1.76E-05 | ME3        |
| ENSG00000110455 | 823.6904015 | 302.3010169 | 1.44650831   | 3.00E-06 | 1.77E-05 | ACCS       |
| ENSG00000109758 | 29.9757131  | 1.365948763 | 4.401239226  | 3.01E-06 | 1.77E-05 | HGFAC      |
| ENSG00000123358 | 4546.410076 | 605.5175791 | 2.908389829  | 3.02E-06 | 1.78E-05 | NR4A1      |
| ENSG00000288062 | 22.28938118 | 0           | 6.812561031  | 3.03E-06 | 1.78E-05 | AL136981.3 |
| ENSG00000077984 | 79.94003978 | 1.447381022 | 5.793652601  | 3.03E-06 | 1.79E-05 | CST7       |
| ENSG00000174343 | 0           | 60.30910216 | -8.494566613 | 3.05E-06 | 1.80E-05 | CHRNA9     |
| ENSG00000077044 | 326.1313987 | 2139.632205 | -2.713699098 | 3.07E-06 | 1.81E-05 | DGKD       |
| ENSG00000154589 | 121.2665415 | 15.17293653 | 2.992708716  | 3.07E-06 | 1.81E-05 | LY96       |
| ENSG00000267731 | 29.53132169 | 0.387220594 | 6.256781999  | 3.08E-06 | 1.81E-05 | AC005332.2 |
| ENSG00000166483 | 229.9017028 | 775.0057382 | -1.753747976 | 3.08E-06 | 1.81E-05 | WEE1       |
| ENSG00000130522 | 5540.473972 | 1440.030936 | 1.943955103  | 3.08E-06 | 1.81E-05 | JUND       |
| ENSG00000102100 | 381.2714745 | 786.4320554 | -1.044894455 | 3.09E-06 | 1.82E-05 | SLC35A2    |
| ENSG00000119977 | 604.0484672 | 1548.001939 | -1.357938349 | 3.09E-06 | 1.82E-05 | TCTN3      |
| ENSG00000279811 | 21.60468726 | 0           | 6.768008561  | 3.11E-06 | 1.83E-05 | AC093330.2 |
| ENSG00000087111 | 663.7704041 | 1489.224788 | -1.165970112 | 3.11E-06 | 1.83E-05 | PIGS       |
| ENSG00000164929 | 285.5163014 | 24.46481813 | 3.551632497  | 3.11E-06 | 1.83E-05 | BAALC      |
| ENSG00000166704 | 256.3685274 | 113.6805503 | 1.172266548  | 3.12E-06 | 1.83E-05 | ZNF606     |
| ENSG00000111796 | 54.65582424 | 0.356539013 | 7.14377446   | 3.12E-06 | 1.83E-05 | KLRB1      |
| ENSG00000180867 | 296.3296431 | 739.915626  | -1.3200122   | 3.13E-06 | 1.84E-05 | PDIA3P1    |
| ENSG00000138069 | 2308.19642  | 4809.190045 | -1.059044468 | 3.14E-06 | 1.85E-05 | RAB1A      |
| ENSG00000166012 | 916.7714217 | 1820.152003 | -0.989391776 | 3.15E-06 | 1.85E-05 | TAF1D      |
| ENSG00000273837 | 20.37907027 | 0           | 6.682173363  | 3.16E-06 | 1.86E-05 | AC018755.4 |
| novel.1079      | 70.98127859 | 1.487519214 | 5.60265478   | 3.17E-06 | 1.86E-05 | -          |
| ENSG00000231721 | 169.2845021 | 46.49805166 | 1.869693778  | 3.22E-06 | 1.89E-05 | LINC-PINT  |
| ENSG00000110245 | 0           | 34.43948135 | -7.685230803 | 3.22E-06 | 1.89E-05 | APOC3      |
| novel.135       | 37.04816868 | 0           | 7.545894879  | 3.22E-06 | 1.89E-05 | -          |
| ENSG00000115295 | 1141.657658 | 542.5274801 | 1.073246831  | 3.22E-06 | 1.89E-05 | CLIP4      |
| ENSG00000196639 | 58.59410411 | 457.0524944 | -2.964433217 | 3.23E-06 | 1.89E-05 | HRH1       |
| novel.722       | 82.99369723 | 189.5880684 | -1.191522744 | 3.24E-06 | 1.90E-05 | -          |
| ENSG00000132254 | 780.6525815 | 1610.711521 | -1.044691492 | 3.24E-06 | 1.90E-05 | ARFIP2     |

|                 |             |             |              |          |          |            |
|-----------------|-------------|-------------|--------------|----------|----------|------------|
| ENSG00000277945 | 0           | 29.58024651 | -7.465181417 | 3.25E-06 | 1.91E-05 | AC107308.1 |
| ENSG00000250786 | 231.432456  | 783.7134423 | -1.759520667 | 3.26E-06 | 1.91E-05 | SNHG18     |
| ENSG00000230982 | 62.65076931 | 12.48348894 | 2.324293031  | 3.27E-06 | 1.92E-05 | DSTNP1     |
| ENSG00000271009 | 102.7565542 | 12.83301149 | 2.988693142  | 3.27E-06 | 1.92E-05 | AC116667.1 |
| ENSG00000128973 | 198.8888205 | 538.7383415 | -1.438020114 | 3.31E-06 | 1.94E-05 | CLN6       |
| ENSG00000205129 | 14.60723749 | 101.0204551 | -2.789977368 | 3.33E-06 | 1.95E-05 | C4orf47    |
| novel.771       | 33.45477089 | 0           | 7.397252016  | 3.34E-06 | 1.95E-05 | -          |
| ENSG00000214108 | 23.13393029 | 0           | 6.866408162  | 3.35E-06 | 1.96E-05 | TPT1P5     |
| ENSG00000101199 | 1930.601347 | 4166.751015 | -1.109770795 | 3.35E-06 | 1.96E-05 | ARFGAP1    |
| ENSG00000122481 | 114.7361638 | 39.34758749 | 1.542921509  | 3.37E-06 | 1.97E-05 | RWDD3      |
| ENSG00000203485 | 8942.084528 | 3530.112123 | 1.340894101  | 3.37E-06 | 1.97E-05 | INF2       |
| ENSG00000139880 | 75.15191181 | 330.5044922 | -2.137779925 | 3.38E-06 | 1.97E-05 | CDH24      |
| ENSG00000007047 | 464.9108597 | 1302.096765 | -1.485676617 | 3.39E-06 | 1.98E-05 | MARK4      |
| ENSG00000181104 | 446.6704334 | 3791.027349 | -3.085408491 | 3.40E-06 | 1.98E-05 | F2R        |
| ENSG00000138193 | 725.798138  | 149.4684455 | 2.278093566  | 3.41E-06 | 1.99E-05 | PLCE1      |
| ENSG00000140464 | 967.9303505 | 1911.273439 | -0.981667461 | 3.42E-06 | 1.99E-05 | PML        |
| ENSG00000133119 | 149.393274  | 519.027708  | -1.796743794 | 3.42E-06 | 2.00E-05 | RFC3       |
| ENSG00000198947 | 5894.018318 | 385.302203  | 3.934848536  | 3.43E-06 | 2.00E-05 | DMD        |
| ENSG00000147601 | 1077.361186 | 461.3933188 | 1.223323755  | 3.44E-06 | 2.01E-05 | TERF1      |
| ENSG00000182397 | 37.85295668 | 2.864080462 | 3.723452963  | 3.44E-06 | 2.01E-05 | DNM1P46    |
| ENSG00000171155 | 401.7124009 | 867.1400481 | -1.110249339 | 3.44E-06 | 2.01E-05 | C1GALT1C1  |
| ENSG00000151458 | 2225.380182 | 660.5908721 | 1.752007016  | 3.44E-06 | 2.01E-05 | ANKRD50    |
| ENSG00000233966 | 16.13139465 | 84.14609297 | -2.386671216 | 3.45E-06 | 2.01E-05 | UBE2SP1    |
| ENSG00000120705 | 1972.58694  | 3701.961783 | -0.908266842 | 3.45E-06 | 2.01E-05 | ETF1       |
| ENSG00000153827 | 2410.759658 | 4160.091805 | -0.787165002 | 3.47E-06 | 2.02E-05 | TRIP12     |
| ENSG00000247077 | 335.2986501 | 836.8441335 | -1.319922604 | 3.47E-06 | 2.02E-05 | PGAM5      |
| ENSG00000178162 | 62.3227823  | 8.947624524 | 2.79869596   | 3.47E-06 | 2.02E-05 | FAR2P2     |
| ENSG00000129038 | 243.9958381 | 2797.477561 | -3.519373484 | 3.48E-06 | 2.03E-05 | LOXL1      |
| ENSG00000136478 | 1361.069089 | 581.3034191 | 1.226946464  | 3.50E-06 | 2.03E-05 | TEX2       |
| ENSG00000090013 | 949.6397532 | 526.0577451 | 0.852418451  | 3.51E-06 | 2.04E-05 | BLVRB      |
| ENSG00000126067 | 1435.437683 | 3186.928869 | -1.15079592  | 3.51E-06 | 2.04E-05 | PSMB2      |
| ENSG00000174939 | 96.22019275 | 930.0584811 | -3.272698526 | 3.52E-06 | 2.05E-05 | ASPHD1     |
| ENSG00000128284 | 577.6697978 | 199.2857927 | 1.534471325  | 3.52E-06 | 2.05E-05 | APOL3      |
| ENSG00000109919 | 130.743118  | 745.8048526 | -2.512594299 | 3.54E-06 | 2.06E-05 | MTCH2      |
| ENSG00000095261 | 481.4322125 | 989.7182423 | -1.039851985 | 3.57E-06 | 2.07E-05 | PSMD5      |
| ENSG00000153283 | 80.30753133 | 3.036401591 | 4.755916032  | 3.59E-06 | 2.08E-05 | CD96       |
| ENSG00000259070 | 30.94404595 | 0           | 7.284711548  | 3.59E-06 | 2.09E-05 | LINC00639  |
| novel.1033      | 35.6405581  | 1.345879667 | 4.662014364  | 3.59E-06 | 2.09E-05 | -          |
| ENSG00000139192 | 464.5057305 | 179.0288328 | 1.375719279  | 3.59E-06 | 2.09E-05 | TAPBPL     |
| ENSG00000246263 | 50.33214641 | 10.42453125 | 2.27213203   | 3.60E-06 | 2.09E-05 | UBR5-AS1   |
| ENSG00000109906 | 10.75721192 | 197.1724879 | -4.199289136 | 3.60E-06 | 2.09E-05 | ZBTB16     |
| ENSG00000187984 | 47.30625557 | 5.983198582 | 2.970407238  | 3.60E-06 | 2.09E-05 | ANKRD19P   |
| ENSG00000070961 | 647.1379608 | 2526.103985 | -1.964720108 | 3.60E-06 | 2.09E-05 | ATP2B1     |
| ENSG00000164068 | 382.9834663 | 785.4694835 | -1.036005157 | 3.62E-06 | 2.10E-05 | RNF123     |
| ENSG00000141522 | 2473.464294 | 5030.255936 | -1.02411126  | 3.63E-06 | 2.10E-05 | ARHGDI3    |
| ENSG00000212802 | 715.1010846 | 1596.806674 | -1.159065864 | 3.64E-06 | 2.11E-05 | RPL15P3    |
| ENSG00000130303 | 2640.195599 | 358.6319639 | 2.880191294  | 3.65E-06 | 2.12E-05 | BST2       |
| ENSG00000082258 | 1495.972507 | 529.1371914 | 1.499451823  | 3.65E-06 | 2.12E-05 | CCNT2      |
| ENSG00000205611 | 34.55674667 | 1.396630344 | 4.602180505  | 3.66E-06 | 2.12E-05 | LINC01597  |
| ENSG00000180481 | 74.96293798 | 10.55799846 | 2.817867432  | 3.66E-06 | 2.12E-05 | GLIPR1L2   |
| ENSG00000075399 | 619.2317466 | 281.6182862 | 1.136313789  | 3.67E-06 | 2.12E-05 | VPS9D1     |



|                 |             |             |              |          |          |              |
|-----------------|-------------|-------------|--------------|----------|----------|--------------|
| ENSG00000185305 | 324.3258808 | 139.7782516 | 1.214308208  | 3.67E-06 | 2.12E-05 | ARL15        |
| ENSG00000070423 | 694.9542418 | 1384.765861 | -0.994497772 | 3.67E-06 | 2.13E-05 | AC004156.1   |
| ENSG00000153066 | 539.5318939 | 998.8531203 | -0.88839648  | 3.69E-06 | 2.14E-05 | TXNDC11      |
| ENSG00000248445 | 33.57401076 | 1.885352294 | 4.202932757  | 3.70E-06 | 2.14E-05 | SEMA6A-AS1   |
| ENSG00000138780 | 126.0750563 | 335.3529519 | -1.412363796 | 3.70E-06 | 2.14E-05 | GSTCD        |
| ENSG00000166535 | 27.85790835 | 0           | 7.13305577   | 3.70E-06 | 2.14E-05 | A2ML1        |
| ENSG00000100335 | 556.2462232 | 1036.156682 | -0.897224137 | 3.73E-06 | 2.15E-05 | MIEF1        |
| ENSG00000258791 | 0.308355904 | 34.09483909 | -6.708105981 | 3.73E-06 | 2.15E-05 | LINC00520    |
| ENSG00000100276 | 34.54413891 | 1.396630344 | 4.601720026  | 3.73E-06 | 2.15E-05 | RASL10A      |
| ENSG00000115137 | 229.4758752 | 76.54751177 | 1.58457792   | 3.73E-06 | 2.16E-05 | DNAJC27      |
| ENSG00000259891 | 90.22901348 | 19.72052245 | 2.185941995  | 3.75E-06 | 2.17E-05 | AC107375.1   |
| ENSG00000164850 | 280.952523  | 23.93176685 | 3.54836372   | 3.77E-06 | 2.18E-05 | GPER1        |
| ENSG00000285278 | 46.27502646 | 0.672939833 | 6.03252228   | 3.78E-06 | 2.18E-05 | AL138885.3   |
| ENSG00000228716 | 320.2535742 | 998.4186416 | -1.640791244 | 3.80E-06 | 2.19E-05 | DHFR         |
| ENSG00000233954 | 73.93435871 | 174.5922049 | -1.23937192  | 3.81E-06 | 2.20E-05 | UQCRHL       |
| ENSG00000119938 | 62.430197   | 461.2047599 | -2.886180741 | 3.82E-06 | 2.20E-05 | PPP1R3C      |
| ENSG00000091129 | 1556.903189 | 375.7999136 | 2.05132412   | 3.83E-06 | 2.21E-05 | NRCAM        |
| ENSG00000169223 | 1860.205487 | 4266.172509 | -1.197533834 | 3.83E-06 | 2.21E-05 | LMAN2        |
| novel.238       | 33.92338142 | 0           | 7.418707131  | 3.84E-06 | 2.21E-05 | -            |
| ENSG00000170734 | 261.5867581 | 747.8970389 | -1.515953393 | 3.84E-06 | 2.22E-05 | POLH         |
| ENSG00000166788 | 165.170426  | 379.2841539 | -1.199699591 | 3.85E-06 | 2.22E-05 | SAAL1        |
| ENSG00000251364 | 100.303042  | 4.088389678 | 4.593607525  | 3.87E-06 | 2.23E-05 | AC107884.1   |
| ENSG00000276975 | 116.0187374 | 3.801514564 | 4.915334251  | 3.87E-06 | 2.23E-05 | HYDIN2       |
| ENSG00000107186 | 1470.423649 | 589.1146096 | 1.319854121  | 3.88E-06 | 2.24E-05 | MPDZ         |
| novel.168       | 11.1535374  | 78.00276117 | -2.80222203  | 3.90E-06 | 2.24E-05 | -            |
| ENSG00000163291 | 354.6662931 | 791.1073507 | -1.157252765 | 3.90E-06 | 2.24E-05 | PAQR3        |
| ENSG00000131459 | 348.4036662 | 5221.538933 | -3.905721041 | 3.90E-06 | 2.24E-05 | GFPT2        |
| ENSG00000102743 | 171.6579382 | 511.5444986 | -1.575495379 | 3.90E-06 | 2.25E-05 | SLC25A15     |
| ENSG00000270689 | 52.99058949 | 1.742556871 | 4.90330536   | 3.91E-06 | 2.25E-05 | BUD13P1      |
| ENSG00000135094 | 61.87978638 | 3.618452555 | 4.101251798  | 3.91E-06 | 2.25E-05 | SDS          |
| ENSG00000286796 | 21.54458304 | 0           | 6.762758658  | 3.91E-06 | 2.25E-05 | AC010883.2   |
| ENSG00000213463 | 1186.018541 | 573.7887103 | 1.047161524  | 3.93E-06 | 2.26E-05 | SYNJ2BP      |
| ENSG00000261884 | 57.4908472  | 14.73599274 | 1.965078983  | 3.94E-06 | 2.26E-05 | AC040162.1   |
| ENSG00000149403 | 25.930944   | 0           | 7.02979965   | 3.95E-06 | 2.27E-05 | GRIK4        |
| ENSG00000141569 | 448.6707536 | 980.8643195 | -1.128482107 | 3.95E-06 | 2.27E-05 | TRIM65       |
| ENSG00000145247 | 83.5292059  | 468.2687238 | -2.487657227 | 3.96E-06 | 2.27E-05 | OCIAD2       |
| ENSG00000115816 | 377.7614315 | 769.7228096 | -1.027056051 | 3.96E-06 | 2.27E-05 | CEBPZ        |
| ENSG00000111726 | 568.8876885 | 1237.691254 | -1.121583205 | 3.99E-06 | 2.29E-05 | CMAS         |
| ENSG00000204832 | 12.29530177 | 131.9852724 | -3.427913128 | 3.99E-06 | 2.29E-05 | ST8SIA6-AS1  |
| ENSG00000168672 | 71.49566157 | 14.33815966 | 2.316692824  | 4.00E-06 | 2.29E-05 | LRATD2       |
| novel.471       | 38.56300831 | 1.029478846 | 5.179916134  | 4.00E-06 | 2.29E-05 | -            |
| ENSG00000172780 | 27.00046675 | 114.1993931 | -2.079473423 | 4.03E-06 | 2.31E-05 | RAB43        |
| ENSG00000196656 | 535.4838465 | 1358.492228 | -1.34336061  | 4.04E-06 | 2.32E-05 | AC004057.1   |
| ENSG00000037241 | 360.1022606 | 849.7816344 | -1.239140575 | 4.05E-06 | 2.32E-05 | RPL26L1      |
| ENSG00000275835 | 57.43178317 | 172.7248667 | -1.588343406 | 4.07E-06 | 2.33E-05 | TUBGCP5      |
| ENSG00000254995 | 39.41522185 | 5.656185276 | 2.788562612  | 4.07E-06 | 2.34E-05 | STX16-NPEPL1 |
| ENSG00000170515 | 1364.257188 | 3111.185946 | -1.189446227 | 4.09E-06 | 2.34E-05 | PA2G4        |
| ENSG00000187642 | 2.653029035 | 51.96300258 | -4.274261439 | 4.10E-06 | 2.35E-05 | PERM1        |
| ENSG00000133138 | 129.3583304 | 670.3401611 | -2.373653289 | 4.10E-06 | 2.35E-05 | TBC1D8B      |
| novel.116       | 182.4666927 | 33.98315762 | 2.419732309  | 4.15E-06 | 2.38E-05 | -            |
| ENSG00000112578 | 240.842989  | 725.7135743 | -1.591657518 | 4.15E-06 | 2.38E-05 | BYSL         |

|                 |             |             |              |          |          |            |
|-----------------|-------------|-------------|--------------|----------|----------|------------|
| ENSG00000157107 | 727.7489485 | 351.4597608 | 1.050129707  | 4.16E-06 | 2.38E-05 | FCHO2      |
| ENSG00000132780 | 1480.189056 | 3405.86255  | -1.202161499 | 4.16E-06 | 2.38E-05 | NASP       |
| ENSG00000115112 | 30.08374105 | 0.387220594 | 6.283622987  | 4.16E-06 | 2.38E-05 | TFCP2L1    |
| novel.671       | 123.9632503 | 1.00940975  | 6.894796087  | 4.17E-06 | 2.39E-05 | -          |
| ENSG00000101346 | 1311.222009 | 2809.066222 | -1.099303094 | 4.20E-06 | 2.40E-05 | POFUT1     |
| ENSG00000178814 | 419.733522  | 128.6803138 | 1.703590583  | 4.20E-06 | 2.40E-05 | OPLAH      |
| ENSG00000147883 | 518.2438392 | 144.0007976 | 1.845815354  | 4.21E-06 | 2.41E-05 | CDKN2B     |
| ENSG00000165023 | 93.65906461 | 2.0188195   | 5.497547137  | 4.21E-06 | 2.41E-05 | DIRAS2     |
| ENSG00000142227 | 1425.680232 | 3105.562836 | -1.123286786 | 4.21E-06 | 2.41E-05 | EMP3       |
| ENSG00000172724 | 51.66574792 | 0           | 8.024546054  | 4.22E-06 | 2.41E-05 | CCL19      |
| ENSG00000136938 | 2019.104274 | 4204.310859 | -1.058244587 | 4.22E-06 | 2.41E-05 | ANP32B     |
| ENSG00000174652 | 792.2619075 | 351.1722437 | 1.174517563  | 4.22E-06 | 2.41E-05 | ZNF266     |
| ENSG00000136908 | 534.6240832 | 1061.045357 | -0.988962802 | 4.22E-06 | 2.41E-05 | DPM2       |
| ENSG00000233030 | 34.59073773 | 0.713078025 | 5.59238564   | 4.23E-06 | 2.41E-05 | AC243772.2 |
| ENSG00000197816 | 79.93102294 | 12.60737115 | 2.666659638  | 4.24E-06 | 2.42E-05 | CCDC180    |
| ENSG00000121691 | 2222.366298 | 1078.318708 | 1.043438288  | 4.26E-06 | 2.43E-05 | CAT        |
| ENSG00000237975 | 178.1170157 | 15.8148096  | 3.504226583  | 4.30E-06 | 2.45E-05 | FLG-AS1    |
| ENSG00000198625 | 1659.401767 | 560.1731669 | 1.566825183  | 4.32E-06 | 2.46E-05 | MDM4       |
| ENSG00000075643 | 24.76285266 | 170.2064216 | -2.783692358 | 4.34E-06 | 2.47E-05 | MOCOS      |
| ENSG00000163126 | 39.74976219 | 3.678659843 | 3.453847244  | 4.34E-06 | 2.47E-05 | ANKRD23    |
| ENSG00000076944 | 236.0621966 | 81.71523189 | 1.527942627  | 4.34E-06 | 2.47E-05 | STXBP2     |
| ENSG00000163568 | 38.70810444 | 2.099095884 | 4.181224308  | 4.36E-06 | 2.48E-05 | AIM2       |
| ENSG00000126243 | 214.3430431 | 459.2422695 | -1.09861536  | 4.36E-06 | 2.49E-05 | LRFN3      |
| ENSG00000110435 | 358.0481079 | 720.5014523 | -1.008815467 | 4.38E-06 | 2.49E-05 | PDHX       |
| ENSG00000237440 | 243.9408085 | 90.76089014 | 1.424612671  | 4.40E-06 | 2.50E-05 | AC008554.1 |
| ENSG00000198513 | 423.5903578 | 65.63965244 | 2.686954597  | 4.40E-06 | 2.51E-05 | ATL1       |
| ENSG00000176697 | 124.7784952 | 710.7048334 | -2.509543362 | 4.40E-06 | 2.51E-05 | BDNF       |
| ENSG00000254854 | 22.46044793 | 0           | 6.824084267  | 4.41E-06 | 2.51E-05 | AP003390.1 |
| ENSG00000287720 | 19.57213097 | 0           | 6.625157833  | 4.41E-06 | 2.51E-05 | AC023480.1 |
| ENSG00000167550 | 225.8781195 | 52.41055886 | 2.109256954  | 4.41E-06 | 2.51E-05 | RHEBL1     |
| ENSG00000039560 | 3273.448861 | 5823.616909 | -0.831074938 | 4.41E-06 | 2.51E-05 | RAI14      |
| ENSG00000104763 | 3777.445286 | 1115.885437 | 1.759029052  | 4.41E-06 | 2.51E-05 | ASAH1      |
| ENSG00000103489 | 6.363400341 | 48.01432588 | -2.916468914 | 4.47E-06 | 2.54E-05 | XYLT1      |
| ENSG00000120658 | 96.04661871 | 26.04592314 | 1.885932793  | 4.48E-06 | 2.54E-05 | ENOX1      |
| ENSG00000183354 | 717.9012633 | 274.4981528 | 1.387978141  | 4.48E-06 | 2.55E-05 | KIAA2026   |
| ENSG00000239405 | 32.00583335 | 0.387220594 | 6.372482371  | 4.49E-06 | 2.55E-05 | TMED10P2   |
| ENSG00000004846 | 29.61155556 | 0           | 7.222489788  | 4.49E-06 | 2.55E-05 | ABCB5      |
| ENSG00000258289 | 922.9274978 | 457.3227677 | 1.012801952  | 4.50E-06 | 2.55E-05 | CHURC1     |
| ENSG00000225398 | 21.99774999 | 0           | 6.792140296  | 4.51E-06 | 2.56E-05 | PGM5P4     |
| ENSG00000203865 | 62.31880754 | 17.51864094 | 1.828506244  | 4.55E-06 | 2.58E-05 | ATP1A1-AS1 |
| ENSG00000181195 | 677.9482878 | 25.45125191 | 4.732010716  | 4.57E-06 | 2.59E-05 | PENK       |
| ENSG00000226491 | 18.8121465  | 0           | 6.567037149  | 4.58E-06 | 2.60E-05 | FTOP1      |
| ENSG00000116141 | 254.5417135 | 58.17338257 | 2.126660412  | 4.59E-06 | 2.60E-05 | MARK1      |
| ENSG00000164039 | 1017.811253 | 424.2658497 | 1.261774092  | 4.63E-06 | 2.62E-05 | BDH2       |
| ENSG00000183798 | 278.2154658 | 22.64725034 | 3.61424832   | 4.63E-06 | 2.62E-05 | EMILIN3    |
| ENSG00000108797 | 447.5875425 | 1745.651677 | -1.963256279 | 4.65E-06 | 2.63E-05 | CNTNAP1    |
| ENSG00000249992 | 115.1455518 | 1442.876319 | -3.647602881 | 4.65E-06 | 2.63E-05 | TMEM158    |
| ENSG00000141736 | 4712.753553 | 1538.321809 | 1.615118095  | 4.66E-06 | 2.64E-05 | ERBB2      |
| ENSG00000110717 | 990.8993249 | 2189.761842 | -1.143939894 | 4.67E-06 | 2.65E-05 | NDUFS8     |
| ENSG00000182667 | 4039.354732 | 807.8849852 | 2.3221877    | 4.68E-06 | 2.65E-05 | NTM        |
| ENSG00000259004 | 24.80067593 | 0           | 6.965199094  | 4.69E-06 | 2.66E-05 | LINC02285  |

|                 |             |             |              |          |          |            |
|-----------------|-------------|-------------|--------------|----------|----------|------------|
| ENSG00000233270 | 42.8046295  | 117.0438368 | -1.452180486 | 4.70E-06 | 2.66E-05 | SNRPEP4    |
| ENSG00000189221 | 162.7119552 | 494.5754161 | -1.604347082 | 4.70E-06 | 2.66E-05 | MAOA       |
| ENSG00000268388 | 3.675126598 | 102.1684222 | -4.800438025 | 4.72E-06 | 2.67E-05 | FENDRR     |
| ENSG00000235478 | 18.99073514 | 0           | 6.581544245  | 4.73E-06 | 2.67E-05 | LINC01664  |
| ENSG00000163466 | 3325.010789 | 7451.671541 | -1.164241975 | 4.73E-06 | 2.68E-05 | ARPC2      |
| ENSG00000255545 | 19.54949403 | 0           | 6.623623614  | 4.74E-06 | 2.68E-05 | AP004608.1 |
| ENSG00000172458 | 150.7662094 | 34.5297751  | 2.121760075  | 4.76E-06 | 2.69E-05 | IL17D      |
| ENSG00000234719 | 44.8897681  | 3.801514564 | 3.534497383  | 4.76E-06 | 2.69E-05 | NPIP2      |
| ENSG00000111790 | 1129.386175 | 626.85479   | 0.849354734  | 4.77E-06 | 2.69E-05 | FGFR10P2   |
| ENSG00000188064 | 0           | 276.1954219 | -10.69058206 | 4.77E-06 | 2.69E-05 | WNT7B      |
| ENSG00000112218 | 7.882542911 | 61.27371586 | -2.961730117 | 4.77E-06 | 2.69E-05 | GPR63      |
| ENSG00000168256 | 611.3277046 | 1271.450197 | -1.056647107 | 4.77E-06 | 2.70E-05 | NKIRAS2    |
| ENSG00000204291 | 3752.035522 | 378.1768981 | 3.310101892  | 4.81E-06 | 2.71E-05 | COL15A1    |
| novel.266       | 21.04112724 | 0           | 6.728122221  | 4.82E-06 | 2.72E-05 | -          |
| ENSG00000105926 | 933.8133425 | 277.3691342 | 1.751213913  | 4.83E-06 | 2.73E-05 | MPP6       |
| ENSG00000005421 | 19.06004218 | 0           | 6.586316526  | 4.86E-06 | 2.74E-05 | PON1       |
| ENSG00000116830 | 235.0167504 | 572.99155   | -1.28617204  | 4.86E-06 | 2.74E-05 | TTF2       |
| ENSG00000254369 | 0           | 27.15007457 | -7.346122885 | 4.87E-06 | 2.75E-05 | HOXA-AS3   |
| ENSG00000204054 | 994.9869349 | 401.3597089 | 1.30953531   | 4.93E-06 | 2.78E-05 | LINC00963  |
| ENSG00000159374 | 42.53527925 | 6.185045417 | 2.791033828  | 4.95E-06 | 2.79E-05 | M1AP       |
| ENSG00000141854 | 94.17190851 | 11.85055891 | 3.001746157  | 4.95E-06 | 2.79E-05 | MISP3      |
| ENSG00000135486 | 11916.27361 | 23276.30132 | -0.965944274 | 4.96E-06 | 2.79E-05 | HNRNPA1    |
| ENSG00000242779 | 123.6190216 | 33.65126402 | 1.875777117  | 4.96E-06 | 2.79E-05 | ZNF702P    |
| ENSG00000166342 | 5.853747575 | 251.0402824 | -5.426207503 | 5.03E-06 | 2.83E-05 | NETO1      |
| ENSG00000205959 | 67.99862507 | 8.083450341 | 3.062421154  | 5.03E-06 | 2.83E-05 | AC105345.1 |
| ENSG00000111644 | 58.40978886 | 8.661905285 | 2.756082954  | 5.05E-06 | 2.84E-05 | ACRBP      |
| ENSG00000105281 | 905.2874153 | 3197.439486 | -1.820595605 | 5.06E-06 | 2.85E-05 | SLC1A5     |
| novel.595       | 18.47348922 | 0           | 6.541084023  | 5.08E-06 | 2.86E-05 | -          |
| ENSG00000125257 | 208.8393782 | 462.145028  | -1.145574948 | 5.09E-06 | 2.86E-05 | ABCC4      |
| ENSG00000198189 | 889.1051352 | 292.8641694 | 1.601097039  | 5.10E-06 | 2.87E-05 | HSD17B11   |
| ENSG00000152128 | 20.78800351 | 0           | 6.711946848  | 5.11E-06 | 2.88E-05 | TMEM163    |
| ENSG00000184949 | 26.21114981 | 93.33642604 | -1.829088247 | 5.13E-06 | 2.88E-05 | FAM227A    |
| ENSG00000112339 | 504.1644752 | 1011.17455  | -1.003831428 | 5.13E-06 | 2.88E-05 | HBS1L      |
| ENSG00000162520 | 70.17287219 | 275.3930558 | -1.973105737 | 5.13E-06 | 2.88E-05 | SYNC       |
| ENSG00000211751 | 53.77875153 | 0.356539013 | 7.120444126  | 5.14E-06 | 2.89E-05 | TRBC1      |
| ENSG00000186187 | 181.7790916 | 423.2608879 | -1.220149453 | 5.15E-06 | 2.90E-05 | ZNRF1      |
| ENSG00000165156 | 1195.31221  | 413.989589  | 1.529055917  | 5.22E-06 | 2.93E-05 | ZHX1       |
| ENSG00000197548 | 335.1683134 | 1106.872871 | -1.723240857 | 5.27E-06 | 2.96E-05 | ATG7       |
| ENSG00000116983 | 58.7288147  | 0.336469917 | 7.247533821  | 5.27E-06 | 2.96E-05 | HPCAL4     |
| ENSG00000269335 | 120.296884  | 272.0946469 | -1.178497228 | 5.28E-06 | 2.96E-05 | IKBK       |
| ENSG00000113758 | 1785.985402 | 7989.048093 | -2.161334486 | 5.28E-06 | 2.97E-05 | DBN1       |
| ENSG00000187193 | 40.59062127 | 153.5618314 | -1.918143159 | 5.29E-06 | 2.97E-05 | MT1X       |
| ENSG00000250120 | 29.57193699 | 0.356539013 | 6.257302776  | 5.31E-06 | 2.98E-05 | PCDHA10    |
| ENSG00000117598 | 39.78586145 | 0           | 7.64758887   | 5.32E-06 | 2.98E-05 | PLPPR5     |
| ENSG00000086570 | 29.95175123 | 2.884149558 | 3.38100473   | 5.33E-06 | 2.99E-05 | FAT2       |
| ENSG00000136010 | 408.0432491 | 1176.40347  | -1.527817574 | 5.34E-06 | 2.99E-05 | ALDH1L2    |
| ENSG00000100379 | 348.0831197 | 769.2125119 | -1.143598423 | 5.34E-06 | 2.99E-05 | KCTD17     |
| ENSG00000174574 | 1004.835275 | 1811.642153 | -0.850483504 | 5.36E-06 | 3.00E-05 | AKIRIN1    |
| ENSG00000250397 | 21.09628814 | 84.34665554 | -1.998763183 | 5.38E-06 | 3.01E-05 | AP006623.1 |
| ENSG00000110013 | 310.5760846 | 894.0583525 | -1.525421738 | 5.38E-06 | 3.01E-05 | SIAE       |
| ENSG00000146678 | 0           | 23.90224114 | -7.163138783 | 5.40E-06 | 3.02E-05 | IGFBP1     |

|                 |             |             |              |          |          |            |
|-----------------|-------------|-------------|--------------|----------|----------|------------|
| ENSG00000205436 | 31.71774929 | 0.356539013 | 6.358461489  | 5.40E-06 | 3.02E-05 | EXOC3L4    |
| ENSG00000162572 | 268.5272239 | 90.33874997 | 1.574643697  | 5.44E-06 | 3.04E-05 | SCNN1D     |
| ENSG00000185189 | 4435.62909  | 1046.842287 | 2.083125259  | 5.44E-06 | 3.05E-05 | NRBP2      |
| ENSG00000183379 | 19.24239177 | 0           | 6.600819833  | 5.45E-06 | 3.05E-05 | SYNDIG1L   |
| ENSG00000148057 | 189.3403152 | 33.74831745 | 2.481807256  | 5.46E-06 | 3.05E-05 | IDNK       |
| ENSG00000088832 | 3775.820069 | 8604.048152 | -1.188183472 | 5.47E-06 | 3.06E-05 | FKBP1A     |
| ENSG00000230333 | 34.30627242 | 0.713078025 | 5.580440736  | 5.49E-06 | 3.07E-05 | AC004160.1 |
| ENSG00000274561 | 47.85999986 | 7.898076582 | 2.600382183  | 5.49E-06 | 3.07E-05 | AC005332.3 |
| ENSG00000131409 | 128.3145221 | 6.011440019 | 4.431015272  | 5.49E-06 | 3.07E-05 | LRRC4B     |
| ENSG00000188707 | 114.0732805 | 12.04911369 | 3.229687118  | 5.52E-06 | 3.09E-05 | ZBED6CL    |
| novel.690       | 3.060922088 | 111.7290958 | -5.194991225 | 5.53E-06 | 3.09E-05 | -          |
| ENSG00000174514 | 65.79987444 | 8.030387913 | 3.020291378  | 5.53E-06 | 3.09E-05 | MFSD4A     |
| ENSG00000140577 | 925.0539234 | 459.0682786 | 1.011095896  | 5.53E-06 | 3.09E-05 | CRTC3      |
| ENSG00000132382 | 869.2491682 | 1973.038073 | -1.182603715 | 5.54E-06 | 3.09E-05 | MYBBP1A    |
| ENSG00000086289 | 1710.044556 | 760.9180964 | 1.168635436  | 5.55E-06 | 3.10E-05 | EPDR1      |
| ENSG00000213199 | 110.0977193 | 13.80099878 | 2.991933492  | 5.58E-06 | 3.12E-05 | ASIC3      |
| ENSG00000167554 | 78.06494609 | 25.55835707 | 1.612728442  | 5.59E-06 | 3.12E-05 | ZNF610     |
| ENSG00000173531 | 289.0314031 | 130.1906806 | 1.151285379  | 5.61E-06 | 3.13E-05 | MST1       |
| ENSG00000100994 | 1537.939759 | 4963.893232 | -1.69054209  | 5.61E-06 | 3.13E-05 | PYGB       |
| ENSG00000040633 | 648.0576589 | 1334.353445 | -1.041835214 | 5.61E-06 | 3.13E-05 | PHF23      |
| ENSG00000123610 | 469.181157  | 126.2410236 | 1.892637044  | 5.62E-06 | 3.13E-05 | TNFAIP6    |
| ENSG00000100336 | 112.0276447 | 1.00940975  | 6.747891321  | 5.65E-06 | 3.15E-05 | APOL4      |
| ENSG00000235513 | 95.16715307 | 18.52561055 | 2.366171927  | 5.68E-06 | 3.17E-05 | AL035681.1 |
| ENSG00000268043 | 430.3039834 | 165.884382  | 1.375717969  | 5.68E-06 | 3.17E-05 | NBPF12     |
| ENSG00000146070 | 46.6926918  | 1.548882377 | 4.978616534  | 5.69E-06 | 3.17E-05 | PLA2G7     |
| ENSG00000101935 | 129.2238054 | 345.8212985 | -1.420824205 | 5.72E-06 | 3.19E-05 | AMMECR1    |
| ENSG00000164975 | 733.2938423 | 1509.686733 | -1.041612683 | 5.73E-06 | 3.19E-05 | SNAPC3     |
| ENSG00000278068 | 21.5845576  | 0           | 6.766618596  | 5.73E-06 | 3.19E-05 | AL136317.3 |
| ENSG00000063244 | 2447.219593 | 5126.534992 | -1.066909028 | 5.76E-06 | 3.21E-05 | U2AF2      |
| ENSG00000067365 | 227.2353978 | 554.4930597 | -1.286381589 | 5.78E-06 | 3.22E-05 | METTL22    |
| ENSG00000076770 | 302.3262632 | 53.47470049 | 2.496397746  | 5.80E-06 | 3.23E-05 | MBNL3      |
| novel.593       | 33.1790102  | 2.864080462 | 3.531495206  | 5.81E-06 | 3.23E-05 | -          |
| ENSG00000019485 | 496.7288897 | 108.5597749 | 2.192245625  | 5.87E-06 | 3.26E-05 | PRDM11     |
| ENSG00000182827 | 731.3770341 | 1744.899222 | -1.254495482 | 5.88E-06 | 3.27E-05 | ACBD3      |
| ENSG00000119705 | 441.9909338 | 1100.803411 | -1.316695281 | 5.90E-06 | 3.28E-05 | SLIRP      |
| ENSG00000141378 | 294.9014482 | 571.5913239 | -0.954971347 | 5.94E-06 | 3.30E-05 | PTRH2      |
| ENSG00000171421 | 298.7362439 | 647.4907984 | -1.116152789 | 5.95E-06 | 3.30E-05 | MRPL36     |
| ENSG00000106789 | 26.32852277 | 175.1920132 | -2.736130127 | 5.96E-06 | 3.31E-05 | CORO2A     |
| ENSG00000187134 | 157.0525517 | 557.4825637 | -1.827996377 | 5.96E-06 | 3.31E-05 | AKR1C1     |
| ENSG00000279713 | 5.104761209 | 43.53503838 | -3.086881806 | 6.00E-06 | 3.33E-05 | AC080038.4 |
| ENSG00000250673 | 18.36392288 | 0           | 6.533302971  | 6.00E-06 | 3.33E-05 | REELD1     |
| ENSG00000131015 | 11.94403672 | 133.6454511 | -3.486080371 | 6.00E-06 | 3.33E-05 | ULBP2      |
| ENSG00000141068 | 1043.420726 | 239.4348254 | 2.12282203   | 6.00E-06 | 3.33E-05 | KSR1       |
| ENSG00000196189 | 113.4489039 | 25.30319102 | 2.171864087  | 6.03E-06 | 3.34E-05 | SEMA4A     |
| ENSG00000183828 | 306.0572081 | 127.4550586 | 1.265830466  | 6.11E-06 | 3.39E-05 | NUDT14     |
| ENSG00000217236 | 51.40753796 | 0           | 8.01731464   | 6.18E-06 | 3.43E-05 | SP9        |
| ENSG00000138382 | 390.1150141 | 780.6097136 | -1.001052985 | 6.20E-06 | 3.44E-05 | METTL5     |
| ENSG00000241170 | 61.66022678 | 10.56861094 | 2.535079051  | 6.20E-06 | 3.44E-05 | AP001992.1 |
| ENSG00000084693 | 369.616277  | 660.037016  | -0.836335331 | 6.20E-06 | 3.44E-05 | AGBL5      |
| ENSG00000105996 | 11.00643252 | 60.02420047 | -2.451719289 | 6.23E-06 | 3.45E-05 | HOXA2      |
| ENSG00000173171 | 185.5122146 | 458.1926744 | -1.303581927 | 6.23E-06 | 3.45E-05 | MTX1       |

|                 |             |             |              |          |          |            |
|-----------------|-------------|-------------|--------------|----------|----------|------------|
| ENSG00000068912 | 902.0966116 | 2218.213792 | -1.298079636 | 6.24E-06 | 3.45E-05 | ERLEC1     |
| ENSG00000197147 | 609.9068324 | 90.11919265 | 2.756661788  | 6.25E-06 | 3.46E-05 | LRR8B      |
| ENSG00000109971 | 6728.847089 | 28268.65129 | -2.070788171 | 6.26E-06 | 3.46E-05 | HSPA8      |
| ENSG00000164867 | 56.70682959 | 10.69963801 | 2.401748195  | 6.28E-06 | 3.48E-05 | NOS3       |
| ENSG00000107185 | 483.6486567 | 958.1073954 | -0.986073767 | 6.32E-06 | 3.50E-05 | RGP1       |
| ENSG00000151470 | 220.9264029 | 92.34148158 | 1.258092176  | 6.33E-06 | 3.50E-05 | C4orf33    |
| ENSG00000172575 | 59.47096335 | 4.319762219 | 3.783838652  | 6.35E-06 | 3.51E-05 | RASGRP1    |
| ENSG00000087303 | 1348.8478   | 7863.364649 | -2.543435053 | 6.36E-06 | 3.52E-05 | NID2       |
| ENSG00000108854 | 657.2874951 | 1630.249807 | -1.310303895 | 6.38E-06 | 3.53E-05 | SMURF2     |
| ENSG00000186792 | 35.37274624 | 133.1468058 | -1.913935832 | 6.39E-06 | 3.53E-05 | HYAL3      |
| ENSG00000233593 | 89.60513544 | 12.52234287 | 2.848646997  | 6.44E-06 | 3.56E-05 | LINC02609  |
| ENSG00000196660 | 28.83333582 | 0           | 7.182715789  | 6.45E-06 | 3.56E-05 | SLC30A10   |
| novel.1085      | 62.92449341 | 5.421216714 | 3.541496843  | 6.45E-06 | 3.56E-05 | -          |
| ENSG00000287024 | 36.4446341  | 1.345879667 | 4.697254404  | 6.48E-06 | 3.58E-05 | AL022162.1 |
| ENSG00000139496 | 789.813039  | 1673.761159 | -1.083274588 | 6.49E-06 | 3.58E-05 | NUP58      |
| novel.182       | 46.66271859 | 1.345879667 | 5.060032252  | 6.54E-06 | 3.61E-05 | -          |
| ENSG00000213316 | 18.89399003 | 0           | 6.57279462   | 6.55E-06 | 3.61E-05 | LTC4S      |
| ENSG00000137871 | 620.8344846 | 327.7630097 | 0.921862491  | 6.56E-06 | 3.62E-05 | ZNF280D    |
| ENSG00000280433 | 192.2282327 | 62.51655311 | 1.6177185    | 6.59E-06 | 3.63E-05 | FP565260.6 |
| ENSG00000274021 | 104.8647723 | 9.834179554 | 3.420273456  | 6.59E-06 | 3.64E-05 | AC024909.1 |
| ENSG00000118596 | 46.93195413 | 343.7785099 | -2.874118626 | 6.67E-06 | 3.68E-05 | SLC16A7    |
| ENSG00000067596 | 665.0889058 | 1177.19275  | -0.823818017 | 6.67E-06 | 3.68E-05 | DHX8       |
| ENSG00000225140 | 37.84403859 | 1.00940975  | 5.163096098  | 6.71E-06 | 3.70E-05 | AL358216.1 |
| ENSG00000132963 | 1382.191518 | 2978.960962 | -1.107971723 | 6.72E-06 | 3.70E-05 | POMP       |
| ENSG00000198246 | 205.7716455 | 70.55138895 | 1.544722496  | 6.76E-06 | 3.73E-05 | SLC29A3    |
| ENSG00000256069 | 31.69378742 | 0.387220594 | 6.357483711  | 6.77E-06 | 3.73E-05 | A2MP1      |
| ENSG00000130956 | 885.3203724 | 439.3160131 | 1.010913676  | 6.79E-06 | 3.74E-05 | HABP4      |
| ENSG00000135900 | 319.3964889 | 631.0025354 | -0.982175516 | 6.83E-06 | 3.76E-05 | MRPL44     |
| ENSG00000237978 | 30.04752743 | 0.672939833 | 5.40090302   | 6.84E-06 | 3.76E-05 | KCNMB2-AS1 |
| ENSG00000188706 | 487.1697104 | 1544.436485 | -1.66465194  | 6.85E-06 | 3.77E-05 | ZDHHC9     |
| ENSG00000163508 | 47.38888203 | 0           | 7.899852432  | 6.87E-06 | 3.78E-05 | EOMES      |
| ENSG00000251209 | 52.16333491 | 1.762625967 | 4.872787321  | 6.87E-06 | 3.78E-05 | LINC00923  |
| ENSG00000162976 | 680.9526301 | 217.0669201 | 1.648253161  | 6.90E-06 | 3.80E-05 | PQLC3      |
| ENSG00000134107 | 4591.473812 | 1174.399207 | 1.96719753   | 6.91E-06 | 3.80E-05 | BHLHE40    |
| ENSG00000223485 | 9.77927715  | 96.68982357 | -3.306994356 | 6.91E-06 | 3.80E-05 | LINC01615  |
| ENSG00000134909 | 576.0020724 | 175.2483205 | 1.717827048  | 6.94E-06 | 3.82E-05 | ARHGAP32   |
| ENSG00000182601 | 30.16490075 | 0           | 7.248234302  | 6.97E-06 | 3.83E-05 | HS3ST4     |
| ENSG00000100823 | 1887.927278 | 3862.432821 | -1.032793685 | 6.99E-06 | 3.84E-05 | APEX1      |
| ENSG00000189306 | 466.0288489 | 1986.858237 | -2.092112045 | 7.00E-06 | 3.85E-05 | RRP7A      |
| ENSG00000184110 | 473.9361359 | 1053.533196 | -1.152702758 | 7.02E-06 | 3.85E-05 | EIF3C      |
| ENSG00000116898 | 684.4672343 | 1389.504612 | -1.02161624  | 7.02E-06 | 3.85E-05 | MRPS15     |
| ENSG00000008083 | 291.1171821 | 2391.805296 | -3.038363977 | 7.03E-06 | 3.86E-05 | JARID2     |
| ENSG00000287077 | 42.92401156 | 8.661905285 | 2.313487736  | 7.06E-06 | 3.87E-05 | AL157893.2 |
| ENSG00000079462 | 115.2612164 | 287.9647495 | -1.321235505 | 7.06E-06 | 3.87E-05 | PAFAH1B3   |
| ENSG00000174171 | 49.01737747 | 2.079026788 | 4.531688636  | 7.06E-06 | 3.87E-05 | AC020659.1 |
| ENSG00000187609 | 599.5724171 | 173.3463667 | 1.791362725  | 7.07E-06 | 3.88E-05 | EXD3       |
| ENSG00000070182 | 357.0114488 | 23.67976445 | 3.919462287  | 7.09E-06 | 3.89E-05 | SPTB       |
| ENSG00000198055 | 497.6238101 | 1091.946629 | -1.13382827  | 7.09E-06 | 3.89E-05 | GRK6       |
| ENSG00000136261 | 520.6716228 | 1271.92617  | -1.288832149 | 7.09E-06 | 3.89E-05 | BZW2       |
| novel.729       | 20.75010896 | 0           | 6.709452216  | 7.10E-06 | 3.89E-05 | -          |
| ENSG00000224546 | 26.3963627  | 82.70658032 | -1.647290545 | 7.12E-06 | 3.90E-05 | EIF4BP3    |

|                 |             |             |              |          |          |               |
|-----------------|-------------|-------------|--------------|----------|----------|---------------|
| ENSG00000128482 | 106.4742771 | 27.25016326 | 1.966427546  | 7.12E-06 | 3.90E-05 | RNF112        |
| ENSG00000149115 | 1728.820901 | 4084.83377  | -1.240410947 | 7.12E-06 | 3.90E-05 | TNKS1BP1      |
| ENSG00000132535 | 410.1045966 | 1450.936527 | -1.82280629  | 7.13E-06 | 3.90E-05 | DLG4          |
| ENSG00000233098 | 61.40064846 | 1.742556871 | 5.116873744  | 7.15E-06 | 3.91E-05 | CCDC144NL-AS1 |
| ENSG00000280798 | 682.4900687 | 230.708124  | 1.565677017  | 7.15E-06 | 3.91E-05 | LINC00294     |
| ENSG00000197253 | 18.36141558 | 0           | 6.533089666  | 7.16E-06 | 3.92E-05 | TPSB2         |
| novel.882       | 8.175783758 | 44.55865663 | -2.447723442 | 7.20E-06 | 3.94E-05 | -             |
| ENSG00000134250 | 1870.878676 | 4365.268698 | -1.222392117 | 7.21E-06 | 3.94E-05 | NOTCH2        |
| ENSG00000173338 | 56.7227001  | 7.094109687 | 2.993675102  | 7.25E-06 | 3.96E-05 | KCNK7         |
| ENSG00000288018 | 88.1212101  | 10.82352021 | 3.028244373  | 7.31E-06 | 4.00E-05 | AP003120.1    |
| ENSG00000186827 | 40.1952647  | 2.038888596 | 4.255730853  | 7.35E-06 | 4.02E-05 | TNFRSF4       |
| ENSG00000188681 | 41.55358318 | 0.336469917 | 6.74840479   | 7.36E-06 | 4.02E-05 | TEKT4P2       |
| ENSG00000165238 | 64.41400317 | 1.345879667 | 5.531208826  | 7.37E-06 | 4.03E-05 | WNK2          |
| ENSG00000066084 | 1792.340143 | 668.5181579 | 1.42297405   | 7.39E-06 | 4.03E-05 | DIP2B         |
| ENSG00000169641 | 704.9926818 | 1417.759767 | -1.00788941  | 7.40E-06 | 4.04E-05 | LUZP1         |
| ENSG00000099954 | 65.16918651 | 1.060160428 | 5.929131774  | 7.41E-06 | 4.05E-05 | CECR2         |
| ENSG00000085760 | 416.5776067 | 784.244802  | -0.91270726  | 7.42E-06 | 4.05E-05 | MTIF2         |
| ENSG00000183918 | 56.31121612 | 0           | 8.148814588  | 7.44E-06 | 4.06E-05 | SH2D1A        |
| ENSG00000256235 | 370.4365628 | 1341.133371 | -1.856335902 | 7.45E-06 | 4.06E-05 | SMIM3         |
| ENSG00000147383 | 341.054328  | 690.2926084 | -1.01725237  | 7.45E-06 | 4.06E-05 | NSDHL         |
| ENSG00000188322 | 36.57920249 | 0.774441189 | 5.648931351  | 7.46E-06 | 4.07E-05 | SBK1          |
| ENSG00000188738 | 47.18952299 | 3.606684194 | 3.712053621  | 7.47E-06 | 4.08E-05 | FSIP2         |
| ENSG00000075340 | 31.91027061 | 1.161661783 | 4.860400388  | 7.48E-06 | 4.08E-05 | ADD2          |
| ENSG00000234284 | 108.5543576 | 31.06473046 | 1.798466486  | 7.49E-06 | 4.09E-05 | ZNF879        |
| ENSG00000286194 | 17.76357977 | 0           | 6.48534746   | 7.51E-06 | 4.09E-05 | AC138207.9    |
| ENSG00000245552 | 108.8196622 | 12.52491141 | 3.108794263  | 7.52E-06 | 4.10E-05 | AP000787.1    |
| ENSG00000135437 | 45.59208438 | 8.95823701  | 2.34701781   | 7.56E-06 | 4.12E-05 | RDH5          |
| ENSG00000105953 | 1707.090334 | 3125.83772  | -0.872683105 | 7.57E-06 | 4.13E-05 | OGDH          |
| ENSG00000100129 | 1279.803566 | 2778.497112 | -1.118407391 | 7.60E-06 | 4.14E-05 | EIF3L         |
| ENSG00000171490 | 1496.027189 | 3131.187491 | -1.065704449 | 7.62E-06 | 4.15E-05 | RSL1D1        |
| ENSG00000107984 | 109.9109524 | 1532.553098 | -3.801803363 | 7.67E-06 | 4.17E-05 | DKK1          |
| ENSG00000143401 | 985.8505784 | 2196.915095 | -1.156190226 | 7.68E-06 | 4.18E-05 | ANP32E        |
| ENSG00000285758 | 17.82905459 | 0           | 6.490149332  | 7.69E-06 | 4.18E-05 | AC036214.4    |
| ENSG00000246705 | 5085.58423  | 1603.566549 | 1.665066544  | 7.72E-06 | 4.20E-05 | H2AFJ         |
| ENSG00000183281 | 43.73979767 | 7.429423729 | 2.546809343  | 7.75E-06 | 4.22E-05 | PLGLB1        |
| ENSG00000171219 | 67.02849727 | 8.640680314 | 2.95700007   | 7.76E-06 | 4.22E-05 | CDC42BPG      |
| ENSG00000181804 | 329.1953812 | 78.99137831 | 2.059019506  | 7.80E-06 | 4.24E-05 | SLC9A9        |
| ENSG00000163050 | 578.8407959 | 260.6031487 | 1.151733259  | 7.81E-06 | 4.24E-05 | COQ8A         |
| ENSG00000105419 | 325.831106  | 961.0652251 | -1.560116515 | 7.83E-06 | 4.26E-05 | MEIS3         |
| ENSG00000214846 | 29.20931784 | 1.436768536 | 4.345505141  | 7.87E-06 | 4.27E-05 | AC114744.1    |
| ENSG00000112293 | 49.33185943 | 4.485066883 | 3.433433231  | 7.88E-06 | 4.28E-05 | GPLD1         |
| ENSG00000143185 | 25.12923276 | 0           | 6.98423869   | 7.88E-06 | 4.28E-05 | XCL2          |
| ENSG00000268758 | 34.57318629 | 0           | 7.445253687  | 7.89E-06 | 4.28E-05 | ADGRE4P       |
| ENSG00000101146 | 345.3004656 | 665.5043259 | -0.946526639 | 7.89E-06 | 4.28E-05 | RAE1          |
| ENSG00000144407 | 19.21871464 | 0           | 6.597327841  | 7.95E-06 | 4.31E-05 | PTH2R         |
| ENSG00000132842 | 773.4050688 | 1497.219263 | -0.953091466 | 8.00E-06 | 4.34E-05 | AP3B1         |
| ENSG00000124422 | 1892.240827 | 3376.737052 | -0.835551703 | 8.01E-06 | 4.34E-05 | USP22         |
| ENSG00000218336 | 1006.033869 | 469.1653642 | 1.101003121  | 8.13E-06 | 4.41E-05 | TENM3         |
| ENSG00000182175 | 498.9387595 | 20.6403276  | 4.59110472   | 8.16E-06 | 4.43E-05 | RGMA          |
| ENSG00000233682 | 22.01154012 | 0           | 6.793105306  | 8.16E-06 | 4.43E-05 | AL356417.2    |
| ENSG00000167157 | 25.00935215 | 536.2924113 | -4.423179093 | 8.17E-06 | 4.43E-05 | PRRX2         |

|                 |             |             |              |          |          |            |
|-----------------|-------------|-------------|--------------|----------|----------|------------|
| ENSG00000179314 | 76.51578722 | 6.860425395 | 3.459159021  | 8.23E-06 | 4.46E-05 | WSCD1      |
| ENSG00000132463 | 1155.17007  | 2450.403788 | -1.08503515  | 8.24E-06 | 4.47E-05 | GRSF1      |
| ENSG00000197405 | 435.6197132 | 99.15979536 | 2.137413688  | 8.32E-06 | 4.51E-05 | C5AR1      |
| ENSG00000168899 | 1516.64991  | 632.8997848 | 1.261163131  | 8.33E-06 | 4.51E-05 | VAMP5      |
| ENSG00000122335 | 390.2641718 | 91.22984696 | 2.094613001  | 8.34E-06 | 4.51E-05 | SERAC1     |
| ENSG00000123353 | 286.0212677 | 581.6713885 | -1.024625546 | 8.34E-06 | 4.52E-05 | ORMDL2     |
| ENSG00000006459 | 453.8096912 | 148.9864704 | 1.608178806  | 8.35E-06 | 4.52E-05 | KDM7A      |
| ENSG00000246223 | 33.3295913  | 0.713078025 | 5.539049529  | 8.36E-06 | 4.52E-05 | LINC01550  |
| ENSG00000259081 | 25.7166121  | 0.387220594 | 6.056672613  | 8.37E-06 | 4.53E-05 | AF111169.3 |
| ENSG00000164221 | 347.4820642 | 168.5361316 | 1.043864355  | 8.39E-06 | 4.54E-05 | CCDC112    |
| ENSG00000090061 | 105.680515  | 254.1990939 | -1.265839371 | 8.39E-06 | 4.54E-05 | CCNK       |
| ENSG00000266017 | 137.4902521 | 24.12030426 | 2.516212683  | 8.40E-06 | 4.54E-05 | MIR4477B   |
| ENSG00000101400 | 1239.41047  | 432.0782776 | 1.521039802  | 8.41E-06 | 4.55E-05 | SNTA1      |
| ENSG00000197619 | 236.9002362 | 95.78260432 | 1.308512904  | 8.41E-06 | 4.55E-05 | ZNF615     |
| ENSG00000117395 | 678.3213848 | 1844.628666 | -1.443479439 | 8.47E-06 | 4.58E-05 | EBNA1BP2   |
| ENSG00000080824 | 11941.75879 | 27321.25509 | -1.194025005 | 8.47E-06 | 4.58E-05 | HSP90AA1   |
| ENSG00000196167 | 25.7597347  | 0           | 7.019994433  | 8.48E-06 | 4.58E-05 | COLCA1     |
| novel.816       | 95.41360912 | 467.4083902 | -2.292174827 | 8.51E-06 | 4.60E-05 | -          |
| ENSG00000240032 | 0           | 17.64953961 | -6.719521985 | 8.52E-06 | 4.60E-05 | LNCSRLR    |
| ENSG00000248540 | 88.30375754 | 0.336469917 | 7.836149964  | 8.53E-06 | 4.60E-05 | AC010931.2 |
| ENSG00000188157 | 2702.076548 | 9281.782594 | -1.780328052 | 8.54E-06 | 4.61E-05 | AGRN       |
| ENSG00000124608 | 399.9616329 | 781.1796922 | -0.965883515 | 8.56E-06 | 4.62E-05 | AARS2      |
| ENSG00000134830 | 67.3195152  | 349.8365786 | -2.377599536 | 8.61E-06 | 4.64E-05 | C5AR2      |
| ENSG00000155744 | 436.8617991 | 194.312937  | 1.169008638  | 8.62E-06 | 4.65E-05 | FAM126B    |
| ENSG00000158850 | 401.3231704 | 834.7246177 | -1.056845907 | 8.64E-06 | 4.66E-05 | B4GALT3    |
| ENSG00000118246 | 450.8473807 | 878.4693709 | -0.962553939 | 8.65E-06 | 4.67E-05 | FASTKD2    |
| ENSG00000131370 | 610.3532736 | 198.98256   | 1.618009548  | 8.67E-06 | 4.67E-05 | SH3BP5     |
| ENSG00000107562 | 4133.849998 | 190.2690306 | 4.440867764  | 8.67E-06 | 4.67E-05 | CXCL12     |
| ENSG00000144228 | 534.1069089 | 259.8316141 | 1.039407803  | 8.71E-06 | 4.69E-05 | SPOPL      |
| ENSG00000132004 | 84.05766375 | 254.5990291 | -1.599766854 | 8.72E-06 | 4.70E-05 | FBXW9      |
| ENSG00000283317 | 16.90147958 | 0           | 6.413272589  | 8.74E-06 | 4.71E-05 | AL831711.1 |
| ENSG00000271895 | 124.4601813 | 18.02987213 | 2.783535317  | 8.76E-06 | 4.72E-05 | AL109811.2 |
| ENSG00000003056 | 802.0587201 | 1402.403058 | -0.80606239  | 8.80E-06 | 4.74E-05 | M6PR       |
| ENSG00000091972 | 728.1955075 | 62.44868706 | 3.541409952  | 8.82E-06 | 4.75E-05 | CD200      |
| ENSG00000250295 | 57.05563078 | 2.079026788 | 4.75438319   | 8.84E-06 | 4.76E-05 | RDH10-AS1  |
| ENSG00000254166 | 1.830005771 | 74.36868744 | -5.34781517  | 8.87E-06 | 4.77E-05 | CASC19     |
| ENSG00000166938 | 735.1219978 | 239.2976337 | 1.618080843  | 8.87E-06 | 4.77E-05 | DIS3L      |
| ENSG00000117226 | 1125.181433 | 420.2929472 | 1.42037445   | 8.92E-06 | 4.80E-05 | GBP3       |
| ENSG00000124440 | 29.33643526 | 376.1210666 | -3.680974532 | 8.98E-06 | 4.83E-05 | HIF3A      |
| ENSG00000181481 | 732.9627341 | 316.6612191 | 1.210421647  | 8.98E-06 | 4.83E-05 | RNF135     |
| ENSG00000158458 | 43.67905271 | 5.828506405 | 2.916429509  | 9.01E-06 | 4.84E-05 | NRG2       |
| ENSG00000101194 | 259.4384541 | 1399.271736 | -2.430859394 | 9.02E-06 | 4.85E-05 | SLC17A9    |
| ENSG00000258498 | 248.153179  | 0.387220594 | 9.326960292  | 9.03E-06 | 4.85E-05 | DIO3OS     |
| ENSG00000090020 | 302.5672503 | 838.4967565 | -1.470616551 | 9.04E-06 | 4.86E-05 | SLC9A1     |
| ENSG00000111445 | 219.7196619 | 438.3046768 | -0.996296861 | 9.05E-06 | 4.86E-05 | RFC5       |
| ENSG00000185946 | 486.6561861 | 190.0234711 | 1.357689838  | 9.06E-06 | 4.87E-05 | RNPC3      |
| ENSG00000164733 | 4904.619897 | 23537.78538 | -2.262764955 | 9.13E-06 | 4.90E-05 | CTSB       |
| ENSG00000106803 | 1171.171284 | 2283.055912 | -0.962969537 | 9.14E-06 | 4.91E-05 | SEC61B     |
| novel.927       | 30.85077705 | 0.356539013 | 6.318410744  | 9.25E-06 | 4.96E-05 | -          |
| ENSG00000171681 | 1474.387645 | 827.0581916 | 0.834310345  | 9.27E-06 | 4.97E-05 | ATF7IP     |
| ENSG00000164509 | 0.586481695 | 42.44748842 | -6.143128342 | 9.29E-06 | 4.98E-05 | IL31RA     |

|                 |             |             |              |          |          |            |
|-----------------|-------------|-------------|--------------|----------|----------|------------|
| ENSG00000105829 | 401.2834096 | 926.7846739 | -1.207478629 | 9.29E-06 | 4.98E-05 | BET1       |
| ENSG00000111490 | 64.81978837 | 13.63684999 | 2.249072483  | 9.29E-06 | 4.98E-05 | TBC1D30    |
| ENSG00000230487 | 553.3457688 | 146.2653266 | 1.917832353  | 9.30E-06 | 4.99E-05 | PSMG3-AS1  |
| ENSG00000108823 | 45.18307987 | 2.079026788 | 4.414193956  | 9.36E-06 | 5.02E-05 | SGCA       |
| ENSG00000163659 | 348.2659237 | 1917.925645 | -2.46125134  | 9.37E-06 | 5.02E-05 | TIPARP     |
| ENSG00000250125 | 19.26509999 | 0           | 6.602282317  | 9.38E-06 | 5.03E-05 | LINC02232  |
| ENSG00000164944 | 806.5798358 | 1585.874448 | -0.975172808 | 9.40E-06 | 5.03E-05 | VIRMA      |
| ENSG00000116771 | 21.12784317 | 79.00340346 | -1.902920843 | 9.41E-06 | 5.04E-05 | AGMAT      |
| ENSG00000100027 | 75.34386367 | 13.67454804 | 2.475024088  | 9.41E-06 | 5.04E-05 | YPEL1      |
| ENSG00000174373 | 714.2532344 | 273.7320592 | 1.383530032  | 9.43E-06 | 5.05E-05 | RALGAPA1   |
| ENSG00000100528 | 1092.071218 | 2490.832598 | -1.189708695 | 9.43E-06 | 5.05E-05 | CNIH1      |
| ENSG00000198700 | 1233.387965 | 2365.964676 | -0.939711208 | 9.45E-06 | 5.06E-05 | IPO9       |
| ENSG00000224689 | 32.7411005  | 0.336469917 | 6.404175215  | 9.47E-06 | 5.06E-05 | ZNF812P    |
| ENSG00000265018 | 37.23026136 | 5.411760104 | 2.786671002  | 9.47E-06 | 5.06E-05 | AGAP12P    |
| ENSG00000232453 | 46.36621499 | 3.718798035 | 3.663700296  | 9.47E-06 | 5.06E-05 | AC105277.1 |
| ENSG00000134574 | 1149.715457 | 491.4997285 | 1.226226256  | 9.48E-06 | 5.07E-05 | DDB2       |
| ENSG00000125810 | 684.7412703 | 75.02271405 | 3.192262445  | 9.50E-06 | 5.08E-05 | CD93       |
| ENSG00000139631 | 737.2134474 | 335.6834671 | 1.135268783  | 9.56E-06 | 5.11E-05 | CSAD       |
| novel.278       | 29.78716653 | 0.336469917 | 6.268199741  | 9.58E-06 | 5.12E-05 | -          |
| ENSG00000238243 | 23.90207739 | 0           | 6.911968123  | 9.59E-06 | 5.12E-05 | OR2W3      |
| ENSG00000167371 | 207.3096088 | 46.24429827 | 2.167486433  | 9.60E-06 | 5.13E-05 | PRRT2      |
| ENSG00000285219 | 59.38897764 | 10.85433018 | 2.438135893  | 9.61E-06 | 5.13E-05 | HULC       |
| ENSG00000134539 | 38.17198251 | 1.733100261 | 4.430516431  | 9.62E-06 | 5.13E-05 | KLRD1      |
| ENSG00000114737 | 155.5309449 | 47.42055374 | 1.709455157  | 9.65E-06 | 5.15E-05 | CISH       |
| ENSG00000177989 | 390.6935744 | 123.946023  | 1.658492986  | 9.67E-06 | 5.16E-05 | ODF3B      |
| ENSG00000117010 | 140.4086844 | 49.9077693  | 1.492885719  | 9.68E-06 | 5.16E-05 | ZNF684     |
| ENSG00000241878 | 497.4383566 | 1380.228493 | -1.472460475 | 9.69E-06 | 5.17E-05 | PISD       |
| novel.667       | 125.6291978 | 269.1202036 | -1.098368441 | 9.72E-06 | 5.18E-05 | -          |
| ENSG00000119227 | 236.7307512 | 65.35110787 | 1.855438541  | 9.75E-06 | 5.20E-05 | PIGZ       |
| ENSG00000160963 | 35.65122803 | 0           | 7.48911618   | 9.79E-06 | 5.22E-05 | COL26A1    |
| ENSG00000052795 | 669.9577672 | 275.6838649 | 1.281636877  | 9.81E-06 | 5.23E-05 | FNIP2      |
| ENSG00000244968 | 42.43832066 | 8.193252432 | 2.367020821  | 9.81E-06 | 5.23E-05 | LIFR-AS1   |
| ENSG00000257732 | 0.308355904 | 22.96925497 | -6.138399364 | 9.82E-06 | 5.23E-05 | AC089983.1 |
| ENSG00000162337 | 637.8930381 | 1733.201523 | -1.442158252 | 9.82E-06 | 5.23E-05 | LRP5       |
| ENSG00000091592 | 723.2773098 | 222.7863823 | 1.699672827  | 9.87E-06 | 5.26E-05 | NLRP1      |
| ENSG00000185090 | 51.07583345 | 6.584162767 | 2.934412207  | 9.91E-06 | 5.27E-05 | MANEAL     |
| ENSG00000172765 | 586.4073623 | 312.8922655 | 0.906773086  | 9.92E-06 | 5.28E-05 | TMCC1      |
| ENSG00000214279 | 110.1679515 | 36.73610454 | 1.585438166  | 9.93E-06 | 5.28E-05 | SCART1     |
| ENSG00000174946 | 28.53884133 | 0           | 7.167929265  | 9.93E-06 | 5.28E-05 | GPR171     |
| ENSG00000156017 | 218.3447178 | 479.9630488 | -1.136699319 | 9.93E-06 | 5.28E-05 | CARNMT1    |
| ENSG00000264522 | 1190.562122 | 614.0363254 | 0.955694649  | 1.00E-05 | 5.32E-05 | OTUD7B     |
| ENSG00000180096 | 152.9907725 | 30.64425974 | 2.320478665  | 1.00E-05 | 5.33E-05 | SEPT1      |
| ENSG00000101213 | 53.4299663  | 4.199347643 | 3.655162812  | 1.01E-05 | 5.35E-05 | PTK6       |
| ENSG00000132692 | 41.36406805 | 0.336469917 | 6.741716694  | 1.01E-05 | 5.37E-05 | BCAN       |
| ENSG00000168477 | 294.4595032 | 11.80237677 | 4.635437151  | 1.01E-05 | 5.38E-05 | TNXB       |
| ENSG00000269893 | 428.1381677 | 1025.734536 | -1.260798521 | 1.01E-05 | 5.38E-05 | SNHG8      |
| ENSG00000165689 | 609.5743432 | 1223.491455 | -1.005337161 | 1.02E-05 | 5.42E-05 | ENTR1      |
| ENSG00000112651 | 461.9849058 | 813.8900889 | -0.816777535 | 1.02E-05 | 5.42E-05 | MRPL2      |
| ENSG00000139173 | 273.6509605 | 77.24933501 | 1.82189594   | 1.02E-05 | 5.43E-05 | TMEM117    |
| ENSG00000130707 | 187.4859043 | 1119.343415 | -2.578050069 | 1.02E-05 | 5.43E-05 | ASS1       |
| novel.159       | 63.75986753 | 17.90586153 | 1.831348543  | 1.03E-05 | 5.47E-05 | -          |



|                 |             |             |              |          |          |            |
|-----------------|-------------|-------------|--------------|----------|----------|------------|
| ENSG00000166402 | 478.2197133 | 229.7551156 | 1.057556504  | 1.03E-05 | 5.49E-05 | TUB        |
| ENSG00000107554 | 343.8526225 | 1210.703333 | -1.81629106  | 1.04E-05 | 5.49E-05 | DNMBP      |
| ENSG00000196482 | 47.83019702 | 2.844011366 | 4.06593931   | 1.04E-05 | 5.50E-05 | ESRRG      |
| ENSG00000114529 | 3.385646697 | 40.22121828 | -3.581077353 | 1.04E-05 | 5.50E-05 | C3orf52    |
| ENSG00000118503 | 623.8740932 | 3916.065959 | -2.650034511 | 1.04E-05 | 5.52E-05 | TNFAIP3    |
| ENSG00000286548 | 19.90577367 | 0           | 6.649232979  | 1.05E-05 | 5.57E-05 | AL596214.1 |
| ENSG00000168300 | 1308.904758 | 687.1478855 | 0.929814912  | 1.05E-05 | 5.59E-05 | PCMTD1     |
| ENSG00000167656 | 35.03326258 | 0           | 7.463884963  | 1.06E-05 | 5.59E-05 | LY6D       |
| ENSG00000196329 | 16.37420447 | 0           | 6.366863532  | 1.06E-05 | 5.59E-05 | GIMAP5     |
| ENSG00000280077 | 224.1438465 | 74.86272204 | 1.583927269  | 1.06E-05 | 5.59E-05 | AL353763.2 |
| ENSG00000111880 | 249.4357257 | 528.4885587 | -1.083743068 | 1.06E-05 | 5.60E-05 | RNGTT      |
| ENSG00000231863 | 30.15562666 | 0.672939833 | 5.408929565  | 1.06E-05 | 5.60E-05 | AL139393.1 |
| ENSG00000005022 | 1699.214512 | 4563.288462 | -1.42529421  | 1.06E-05 | 5.61E-05 | SLC25A5    |
| ENSG00000135898 | 34.85417539 | 0.387220594 | 6.494580463  | 1.06E-05 | 5.61E-05 | GPR55      |
| ENSG00000173221 | 603.1947717 | 1745.391159 | -1.53305817  | 1.06E-05 | 5.63E-05 | GLRX       |
| ENSG00000182632 | 19.85061277 | 0           | 6.644008134  | 1.07E-05 | 5.67E-05 | CCNYL2     |
| ENSG00000260876 | 20.1346508  | 0           | 6.666055016  | 1.07E-05 | 5.67E-05 | LINC01229  |
| ENSG00000128692 | 101.7395422 | 298.5488872 | -1.554156345 | 1.07E-05 | 5.68E-05 | EIF2S2P4   |
| ENSG00000078814 | 157.1723766 | 36.23805437 | 2.114599579  | 1.08E-05 | 5.69E-05 | MYH7B      |
| ENSG00000008513 | 446.1915816 | 3236.71541  | -2.858807633 | 1.08E-05 | 5.69E-05 | ST3GAL1    |
| ENSG00000108671 | 1122.412588 | 2050.096161 | -0.869172517 | 1.08E-05 | 5.70E-05 | PSMD11     |
| ENSG00000170703 | 32.37952153 | 0.713078025 | 5.496550024  | 1.08E-05 | 5.71E-05 | TTLL6      |
| ENSG00000222022 | 0           | 18.81004551 | -6.811630967 | 1.08E-05 | 5.71E-05 | AC112721.1 |
| ENSG00000089876 | 371.8303561 | 742.7325043 | -0.997970813 | 1.09E-05 | 5.73E-05 | DHX32      |
| ENSG00000136950 | 646.66703   | 1427.366782 | -1.142532741 | 1.09E-05 | 5.75E-05 | ARPC5L     |
| ENSG00000272732 | 33.25150872 | 0.693008929 | 5.544457101  | 1.09E-05 | 5.76E-05 | AC004982.1 |
| ENSG00000164111 | 10608.63107 | 18480.71105 | -0.800789634 | 1.09E-05 | 5.76E-05 | ANXA5      |
| ENSG00000180346 | 74.44798623 | 225.7857278 | -1.600330811 | 1.09E-05 | 5.76E-05 | TIGD2      |
| ENSG00000136813 | 1751.898205 | 3145.458726 | -0.844347518 | 1.10E-05 | 5.78E-05 | ECPAS      |
| ENSG00000168404 | 226.2212765 | 579.9830371 | -1.358530327 | 1.10E-05 | 5.80E-05 | MLKL       |
| ENSG00000222032 | 0           | 19.8076869  | -6.887063147 | 1.10E-05 | 5.81E-05 | AC112721.2 |
| ENSG00000150768 | 574.4928993 | 1172.115114 | -1.029037273 | 1.10E-05 | 5.81E-05 | DLAT       |
| ENSG00000278107 | 29.85729994 | 2.171071533 | 3.790380564  | 1.11E-05 | 5.83E-05 | AC027575.2 |
| ENSG00000245694 | 133.7110719 | 398.8685934 | -1.576126369 | 1.11E-05 | 5.84E-05 | CRNDE      |
| ENSG00000196839 | 48.24811891 | 272.5175453 | -2.498246915 | 1.11E-05 | 5.85E-05 | ADA        |
| novel.835       | 27.15007893 | 2.10970837  | 3.666172691  | 1.11E-05 | 5.87E-05 | -          |
| ENSG00000276547 | 35.17868653 | 139.6819685 | -1.990399681 | 1.11E-05 | 5.87E-05 | PCDHGB5    |
| ENSG00000111181 | 179.3398511 | 0           | 9.820208645  | 1.11E-05 | 5.87E-05 | SLC6A12    |
| ENSG00000142552 | 1348.698774 | 6198.445399 | -2.200377636 | 1.12E-05 | 5.92E-05 | RCN3       |
| ENSG00000172403 | 1072.586506 | 57.11352611 | 4.229351562  | 1.13E-05 | 5.93E-05 | SYNPO2     |
| ENSG00000197576 | 1.843867178 | 34.78584024 | -4.250440252 | 1.13E-05 | 5.94E-05 | HOXA4      |
| ENSG00000164305 | 374.5882929 | 763.7287074 | -1.028206666 | 1.13E-05 | 5.95E-05 | CASP3      |
| ENSG00000211459 | 22796.05949 | 6788.431158 | 1.747645525  | 1.13E-05 | 5.96E-05 | MT-RNR1    |
| ENSG00000198824 | 326.4753553 | 674.3426615 | -1.046766258 | 1.14E-05 | 6.01E-05 | CHAMP1     |
| ENSG00000151967 | 128.2301152 | 27.01647897 | 2.244541287  | 1.14E-05 | 6.02E-05 | SCHIP1     |
| ENSG00000287232 | 28.08650075 | 1.834601616 | 3.959132624  | 1.15E-05 | 6.04E-05 | AC079848.2 |
| ENSG00000164142 | 89.33270877 | 17.36394876 | 2.366543779  | 1.15E-05 | 6.04E-05 | FAM160A1   |
| ENSG00000126266 | 17.36607192 | 0           | 6.451143048  | 1.15E-05 | 6.07E-05 | FFAR1      |
| ENSG00000011523 | 593.6736916 | 308.9078173 | 0.942909412  | 1.16E-05 | 6.07E-05 | CEP68      |
| ENSG00000166147 | 2162.777819 | 8645.580044 | -1.99912551  | 1.16E-05 | 6.09E-05 | FBN1       |
| ENSG00000185436 | 68.89493013 | 11.43265673 | 2.603978593  | 1.16E-05 | 6.09E-05 | IFNLR1     |

|                 |             |             |              |          |          |            |
|-----------------|-------------|-------------|--------------|----------|----------|------------|
| ENSG00000144028 | 2471.483577 | 4500.961996 | -0.864808824 | 1.16E-05 | 6.10E-05 | SNRNP200   |
| novel.291       | 22.26541931 | 0           | 6.810946105  | 1.16E-05 | 6.10E-05 | -          |
| ENSG00000259439 | 44.94460047 | 0           | 7.823443254  | 1.16E-05 | 6.10E-05 | LINC01833  |
| ENSG00000143727 | 1010.68888  | 1742.052702 | -0.785382334 | 1.17E-05 | 6.12E-05 | ACP1       |
| ENSG00000227496 | 2.431602522 | 26.42728315 | -3.446497214 | 1.17E-05 | 6.12E-05 | AC099066.2 |
| ENSG00000120332 | 34.97502457 | 0           | 7.461544937  | 1.17E-05 | 6.12E-05 | TNN        |
| ENSG00000196684 | 47.08525598 | 1.426156051 | 5.038052415  | 1.17E-05 | 6.13E-05 | HSH2D      |
| ENSG00000119915 | 1.539272221 | 27.29132894 | -4.161326009 | 1.17E-05 | 6.15E-05 | ELOVL3     |
| ENSG00000155846 | 126.9786695 | 30.50518873 | 2.050431195  | 1.17E-05 | 6.15E-05 | PPARGC1B   |
| ENSG00000065054 | 1679.423849 | 822.1944405 | 1.030140241  | 1.17E-05 | 6.15E-05 | SLC9A3R2   |
| ENSG00000276128 | 25.28329007 | 0           | 6.994917529  | 1.17E-05 | 6.16E-05 | AL591441.1 |
| ENSG00000092621 | 476.1566971 | 1743.419429 | -1.872629226 | 1.18E-05 | 6.16E-05 | PHGDH      |
| ENSG00000119421 | 667.2752625 | 1260.894416 | -0.918077528 | 1.18E-05 | 6.17E-05 | NDUFA8     |
| ENSG00000059377 | 888.4104114 | 363.1205796 | 1.291401064  | 1.18E-05 | 6.19E-05 | TBXAS1     |
| ENSG00000030110 | 375.6074559 | 747.1369693 | -0.992580554 | 1.19E-05 | 6.21E-05 | BAK1       |
| novel.207       | 34.22826111 | 0.672939833 | 5.595449425  | 1.19E-05 | 6.22E-05 | -          |
| ENSG00000164916 | 525.2866338 | 1398.496809 | -1.412779255 | 1.19E-05 | 6.24E-05 | FOXK1      |
| ENSG00000137103 | 678.8553555 | 358.2609252 | 0.922085276  | 1.20E-05 | 6.27E-05 | TMEM8B     |
| ENSG00000089195 | 223.9949178 | 513.7312257 | -1.19776637  | 1.20E-05 | 6.28E-05 | TRMT6      |
| ENSG00000167083 | 54.27676545 | 4.106018629 | 3.746947736  | 1.21E-05 | 6.31E-05 | GNGT2      |
| novel.100       | 16.35156752 | 0           | 6.365076395  | 1.21E-05 | 6.32E-05 | -          |
| ENSG00000141556 | 513.0574476 | 1448.161849 | -1.497161368 | 1.21E-05 | 6.33E-05 | TBCD       |
| ENSG00000115694 | 1913.664934 | 3476.583436 | -0.861246548 | 1.21E-05 | 6.34E-05 | STK25      |
| ENSG00000174721 | 169.0162202 | 31.49568526 | 2.418554817  | 1.22E-05 | 6.37E-05 | FGFBP3     |
| ENSG00000273486 | 75.52524434 | 14.72409598 | 2.369666958  | 1.23E-05 | 6.41E-05 | AC096992.2 |
| ENSG00000228412 | 67.19028993 | 5.207601518 | 3.673176612  | 1.23E-05 | 6.45E-05 | AL022068.1 |
| ENSG00000107742 | 313.6787609 | 26.48188663 | 3.560984594  | 1.24E-05 | 6.47E-05 | SPOCK2     |
| ENSG00000092140 | 343.1839576 | 744.0645731 | -1.116586587 | 1.24E-05 | 6.49E-05 | G2E3       |
| ENSG00000067248 | 626.3382486 | 1103.087144 | -0.816706003 | 1.24E-05 | 6.50E-05 | DHX29      |
| ENSG00000105088 | 171.4407271 | 31.03019607 | 2.469181755  | 1.25E-05 | 6.50E-05 | OLFM2      |
| ENSG00000154640 | 441.9611893 | 867.2353037 | -0.972186155 | 1.25E-05 | 6.51E-05 | BTG3       |
| ENSG00000138386 | 1762.000052 | 827.4792103 | 1.090621949  | 1.25E-05 | 6.52E-05 | NAB1       |
| ENSG00000172399 | 46.61697398 | 4.82970914  | 3.292166791  | 1.25E-05 | 6.52E-05 | MYO22      |
| ENSG00000244716 | 788.9836443 | 1883.111922 | -1.25508548  | 1.25E-05 | 6.52E-05 | BX679664.3 |
| ENSG00000275620 | 31.37568741 | 0           | 7.30507074   | 1.25E-05 | 6.53E-05 | AL121827.2 |
| ENSG00000186205 | 397.0276152 | 21.4785721  | 4.202785912  | 1.25E-05 | 6.54E-05 | MARC1      |
| ENSG00000062524 | 77.33393808 | 18.28490979 | 2.070897683  | 1.26E-05 | 6.54E-05 | LTK        |
| ENSG00000197769 | 65.12341407 | 3.761376372 | 4.087302467  | 1.26E-05 | 6.55E-05 | MAP1LC3C   |
| ENSG00000279092 | 0           | 33.47136567 | -7.644261068 | 1.27E-05 | 6.60E-05 | AC025678.3 |
| novel.874       | 42.58062441 | 184.2210703 | -2.112870124 | 1.27E-05 | 6.60E-05 | -          |
| novel.657       | 47.62750362 | 0.774441189 | 6.018807585  | 1.27E-05 | 6.61E-05 | -          |
| ENSG00000034510 | 16103.64608 | 31582.54693 | -0.971749275 | 1.27E-05 | 6.62E-05 | TMSB10     |
| ENSG00000197050 | 162.9250049 | 63.05255812 | 1.367099286  | 1.27E-05 | 6.63E-05 | ZNF420     |
| ENSG00000140374 | 1037.717425 | 1973.640879 | -0.927398426 | 1.28E-05 | 6.64E-05 | ETFA       |
| ENSG00000168781 | 348.0857413 | 123.2459161 | 1.496133306  | 1.28E-05 | 6.66E-05 | PIIP5K1    |
| ENSG00000275580 | 49.86107238 | 5.513261459 | 3.19214916   | 1.28E-05 | 6.68E-05 | AC022306.2 |
| ENSG00000169895 | 792.4006336 | 1796.549677 | -1.180897051 | 1.28E-05 | 6.68E-05 | SYAP1      |
| ENSG00000143363 | 432.149373  | 191.9007795 | 1.171459126  | 1.29E-05 | 6.69E-05 | PRUNE1     |
| ENSG00000250208 | 71.59777659 | 1.702418679 | 5.359674116  | 1.29E-05 | 6.70E-05 | FZD10-AS1  |
| ENSG00000184939 | 896.3856548 | 514.1669196 | 0.802124833  | 1.29E-05 | 6.70E-05 | ZFP90      |
| ENSG00000038358 | 543.831369  | 1135.288715 | -1.061682773 | 1.29E-05 | 6.71E-05 | EDC4       |

|                 |             |             |              |          |          |            |
|-----------------|-------------|-------------|--------------|----------|----------|------------|
| ENSG00000166920 | 9.995689068 | 320.4250918 | -5.0023399   | 1.29E-05 | 6.72E-05 | C15orf48   |
| ENSG00000274737 | 1.509042109 | 21.96112949 | -3.859291061 | 1.29E-05 | 6.73E-05 | AC004466.2 |
| ENSG00000106305 | 159.906992  | 530.2045695 | -1.729869226 | 1.30E-05 | 6.75E-05 | AIMP2      |
| ENSG00000106003 | 540.2682382 | 69.1653711  | 2.965711045  | 1.30E-05 | 6.76E-05 | LFNG       |
| ENSG00000074964 | 1164.613172 | 372.7589828 | 1.644342643  | 1.31E-05 | 6.78E-05 | ARHGEF10L  |
| ENSG00000064932 | 82.44962613 | 264.9576081 | -1.682965916 | 1.31E-05 | 6.80E-05 | SBNO2      |
| ENSG00000175591 | 40.13433411 | 1.467450118 | 4.792011782  | 1.31E-05 | 6.80E-05 | P2RY2      |
| ENSG00000182021 | 18.91043    | 0           | 6.574094073  | 1.31E-05 | 6.81E-05 | AL591379.1 |
| ENSG00000005194 | 446.0472145 | 1053.214705 | -1.239799394 | 1.31E-05 | 6.81E-05 | CIAPIN1    |
| ENSG00000159840 | 76.98664745 | 289.4181198 | -1.910782567 | 1.32E-05 | 6.85E-05 | ZYX        |
| ENSG00000004468 | 113.5709633 | 2.71054416  | 5.422452726  | 1.32E-05 | 6.86E-05 | CD38       |
| ENSG00000159199 | 909.3849538 | 1852.262994 | -1.026465583 | 1.33E-05 | 6.87E-05 | ATP5MC1    |
| ENSG00000175137 | 625.3070191 | 1335.8222   | -1.094868971 | 1.33E-05 | 6.88E-05 | SH3BP5L    |
| ENSG00000148604 | 27.22962897 | 0           | 7.10088119   | 1.33E-05 | 6.89E-05 | RGR        |
| ENSG00000101361 | 1238.137883 | 3333.108496 | -1.428805407 | 1.33E-05 | 6.90E-05 | NOP56      |
| ENSG00000178826 | 32.10243593 | 0.713078025 | 5.48505844   | 1.33E-05 | 6.91E-05 | TMEM139    |
| ENSG00000067113 | 1004.180783 | 323.4215214 | 1.633601226  | 1.33E-05 | 6.91E-05 | PLPP1      |
| ENSG00000104549 | 393.0803745 | 1038.92022  | -1.4022614   | 1.34E-05 | 6.93E-05 | SQLE       |
| ENSG00000157593 | 1340.093185 | 2697.231962 | -1.009134568 | 1.34E-05 | 6.93E-05 | SLC35B2    |
| ENSG00000154269 | 27.92553446 | 0.672939833 | 5.296371335  | 1.34E-05 | 6.96E-05 | ENPP3      |
| ENSG00000153975 | 142.7599105 | 285.4443178 | -0.999539604 | 1.34E-05 | 6.96E-05 | ZUP1       |
| ENSG00000261083 | 40.75645996 | 0.672939833 | 5.851603663  | 1.36E-05 | 7.03E-05 | LINC02516  |
| ENSG00000142208 | 2144.093726 | 3783.115463 | -0.819137167 | 1.36E-05 | 7.04E-05 | AKT1       |
| ENSG00000125814 | 423.3497553 | 189.0934859 | 1.162702782  | 1.36E-05 | 7.04E-05 | NAPB       |
| ENSG00000170085 | 121.8866586 | 250.9051333 | -1.042161605 | 1.36E-05 | 7.05E-05 | SIMC1      |
| ENSG00000011638 | 43.8881562  | 186.961093  | -2.089465943 | 1.37E-05 | 7.07E-05 | TMEM159    |
| ENSG00000181638 | 100.5156496 | 215.2028271 | -1.097536088 | 1.37E-05 | 7.10E-05 | ZFP41      |
| ENSG00000165684 | 385.2958018 | 790.7679396 | -1.037050497 | 1.38E-05 | 7.12E-05 | SNAPC4     |
| ENSG00000169085 | 18.3286069  | 0           | 6.530587423  | 1.38E-05 | 7.15E-05 | VXN        |
| novel.794       | 9.733931982 | 93.87731165 | -3.269374181 | 1.38E-05 | 7.15E-05 | -          |
| novel.162       | 19.53974957 | 0           | 6.621289037  | 1.39E-05 | 7.17E-05 | -          |
| ENSG00000137078 | 52.14244946 | 1.161661783 | 5.551913541  | 1.39E-05 | 7.17E-05 | SIT1       |
| ENSG00000196876 | 65.96076945 | 254.8509715 | -1.948686337 | 1.39E-05 | 7.18E-05 | SCN8A      |
| ENSG00000168090 | 1697.441111 | 2907.641947 | -0.77647994  | 1.40E-05 | 7.21E-05 | COPS6      |
| ENSG00000135127 | 49.97260402 | 3.210006989 | 3.955570711  | 1.40E-05 | 7.22E-05 | BICDL1     |
| ENSG00000163898 | 55.9776447  | 0.356539013 | 7.178350545  | 1.40E-05 | 7.23E-05 | LIPH       |
| ENSG00000196275 | 374.2099774 | 63.61355968 | 2.554066305  | 1.41E-05 | 7.27E-05 | GTF2IRD2   |
| ENSG00000175264 | 42.43832066 | 9.04912588  | 2.235369342  | 1.41E-05 | 7.28E-05 | CHST1      |
| ENSG00000243244 | 662.4712796 | 286.8976882 | 1.208420219  | 1.41E-05 | 7.30E-05 | STON1      |
| ENSG00000282851 | 100.0308841 | 12.15634724 | 3.048688809  | 1.42E-05 | 7.32E-05 | BISPR      |
| ENSG00000172543 | 90.20250088 | 8.600413728 | 3.405325444  | 1.42E-05 | 7.32E-05 | CTSW       |
| ENSG00000156042 | 108.800102  | 29.37061251 | 1.883733213  | 1.42E-05 | 7.33E-05 | CFAP70     |
| ENSG00000110841 | 1093.543504 | 2731.33659  | -1.320693074 | 1.43E-05 | 7.36E-05 | PPFIBP1    |
| ENSG00000111145 | 846.5213747 | 3117.04854  | -1.880535944 | 1.43E-05 | 7.37E-05 | ELK3       |
| ENSG00000083290 | 1059.766763 | 468.4136078 | 1.178074822  | 1.43E-05 | 7.38E-05 | ULK2       |
| ENSG00000147443 | 74.03063276 | 1.345879667 | 5.736777684  | 1.43E-05 | 7.38E-05 | DOK2       |
| ENSG00000082196 | 101.5426901 | 14.10678712 | 2.841936622  | 1.43E-05 | 7.39E-05 | C1QTNF3    |
| ENSG00000144476 | 1180.354004 | 166.1550065 | 2.827735293  | 1.44E-05 | 7.40E-05 | ACKR3      |
| ENSG00000186812 | 1055.736456 | 437.5909908 | 1.270885274  | 1.44E-05 | 7.42E-05 | ZNF397     |
| ENSG00000249958 | 25.73047351 | 1.049547942 | 4.586447062  | 1.44E-05 | 7.42E-05 | CCT7P2     |
| novel.98        | 15.7235016  | 0           | 6.308780175  | 1.44E-05 | 7.43E-05 | -          |

|                 |             |             |              |          |          |            |
|-----------------|-------------|-------------|--------------|----------|----------|------------|
| ENSG00000164294 | 909.0356496 | 3582.425335 | -1.978637108 | 1.44E-05 | 7.43E-05 | GPX8       |
| ENSG00000243696 | 36.34140727 | 2.221822211 | 4.058809689  | 1.45E-05 | 7.44E-05 | AC006254.1 |
| ENSG00000127324 | 565.7420396 | 1.682349583 | 8.373639037  | 1.46E-05 | 7.49E-05 | TSPAN8     |
| novel.683       | 0           | 28.44049885 | -7.413331425 | 1.46E-05 | 7.51E-05 | -          |
| ENSG00000137135 | 40.27069779 | 148.4678032 | -1.881559628 | 1.46E-05 | 7.53E-05 | ARHGGEF39  |
| novel.474       | 29.69633366 | 3.200550379 | 3.205958377  | 1.46E-05 | 7.53E-05 | -          |
| ENSG00000285700 | 28.2164102  | 0           | 7.151596645  | 1.47E-05 | 7.55E-05 | AC104260.3 |
| ENSG00000273247 | 103.5710589 | 28.01399197 | 1.887181914  | 1.48E-05 | 7.59E-05 | AC097376.2 |
| ENSG00000078808 | 3091.705648 | 5847.75693  | -0.919487486 | 1.49E-05 | 7.63E-05 | SDF4       |
| ENSG00000226496 | 24.82470907 | 0           | 6.966730601  | 1.49E-05 | 7.64E-05 | LINC00323  |
| ENSG00000179270 | 15.76633947 | 0           | 6.312305155  | 1.49E-05 | 7.67E-05 | PCARE      |
| ENSG00000244586 | 6.693139545 | 156.3692874 | -4.546883015 | 1.49E-05 | 7.67E-05 | WNT5A-AS1  |
| ENSG00000119715 | 15.44913675 | 0           | 6.283110155  | 1.49E-05 | 7.67E-05 | ESRRB      |
| novel.205       | 2.773949485 | 51.94049334 | -4.23573968  | 1.50E-05 | 7.68E-05 | -          |
| ENSG00000132383 | 973.9561623 | 1896.009917 | -0.961243876 | 1.51E-05 | 7.73E-05 | RPA1       |
| ENSG00000134201 | 82.79325422 | 2.129777466 | 5.274021162  | 1.51E-05 | 7.74E-05 | GSTM5      |
| ENSG00000094914 | 822.9254194 | 1417.089212 | -0.783994039 | 1.51E-05 | 7.74E-05 | AAAS       |
| ENSG00000231252 | 25.02983815 | 0           | 6.978848948  | 1.51E-05 | 7.76E-05 | AC099792.1 |
| ENSG00000185101 | 37.92645159 | 1.854670712 | 4.380941282  | 1.52E-05 | 7.81E-05 | ANO9       |
| ENSG00000164054 | 2836.081805 | 5293.042703 | -0.900243392 | 1.53E-05 | 7.83E-05 | SHISA5     |
| ENSG00000186301 | 90.55811195 | 18.15144258 | 2.316482013  | 1.53E-05 | 7.85E-05 | MST1P2     |
| ENSG00000184363 | 13.68216978 | 58.62988188 | -2.100984433 | 1.53E-05 | 7.86E-05 | PKP3       |
| ENSG00000066855 | 286.4831671 | 684.9333025 | -1.257813421 | 1.54E-05 | 7.87E-05 | MTFR1      |
| ENSG00000122565 | 2027.831722 | 3847.616244 | -0.924095458 | 1.54E-05 | 7.88E-05 | CBX3       |
| ENSG00000026508 | 4400.380227 | 11010.11612 | -1.323095957 | 1.54E-05 | 7.90E-05 | CD44       |
| ENSG00000177706 | 1637.236017 | 5616.489239 | -1.778364699 | 1.54E-05 | 7.91E-05 | FAM20C     |
| ENSG00000138035 | 484.9401052 | 1027.070864 | -1.08282667  | 1.55E-05 | 7.92E-05 | PNPT1      |
| ENSG00000136448 | 1601.914273 | 2750.544298 | -0.780007157 | 1.55E-05 | 7.93E-05 | NMT1       |
| ENSG00000145545 | 346.7696753 | 624.7214637 | -0.849408466 | 1.55E-05 | 7.95E-05 | SRD5A1     |
| ENSG00000132967 | 490.5784373 | 1041.672876 | -1.086724578 | 1.55E-05 | 7.95E-05 | HMGB1P5    |
| ENSG00000165443 | 21.23329256 | 0           | 6.742961804  | 1.56E-05 | 7.96E-05 | PHYHIPL    |
| ENSG00000186017 | 267.2245645 | 123.2207099 | 1.116618684  | 1.56E-05 | 7.96E-05 | ZNF566     |
| novel.144       | 16.12380149 | 0           | 6.344196626  | 1.56E-05 | 7.97E-05 | -          |
| ENSG00000284707 | 74.50702244 | 6.74587141  | 3.461062375  | 1.56E-05 | 7.98E-05 | AC079781.5 |
| ENSG00000116649 | 1144.469201 | 2988.865093 | -1.385033876 | 1.56E-05 | 7.98E-05 | SRM        |
| ENSG00000180855 | 79.74032509 | 26.43673976 | 1.590157175  | 1.57E-05 | 8.04E-05 | ZNF443     |
| ENSG00000068831 | 293.3324708 | 29.34481122 | 3.316510235  | 1.59E-05 | 8.10E-05 | RASGRP2    |
| ENSG00000074181 | 973.6808108 | 2932.123782 | -1.590465695 | 1.59E-05 | 8.10E-05 | NOTCH3     |
| ENSG00000232533 | 69.17688778 | 215.0030353 | -1.635852761 | 1.59E-05 | 8.11E-05 | AC093673.1 |
| ENSG00000184588 | 274.1585607 | 1775.682992 | -2.695308283 | 1.60E-05 | 8.15E-05 | PDE4B      |
| ENSG00000135040 | 251.7435449 | 492.0518683 | -0.966974584 | 1.60E-05 | 8.16E-05 | NAA35      |
| ENSG00000237187 | 1341.88249  | 417.9239285 | 1.682377523  | 1.60E-05 | 8.17E-05 | NR2F1-AS1  |
| ENSG00000233328 | 47.84642318 | 135.4993983 | -1.500503488 | 1.60E-05 | 8.18E-05 | PFN1P1     |
| ENSG00000107954 | 108.7050534 | 12.51648228 | 3.118178532  | 1.60E-05 | 8.18E-05 | NEURL1     |
| ENSG00000286558 | 18.32867817 | 0           | 6.53056623   | 1.60E-05 | 8.18E-05 | AC098679.5 |
| ENSG00000130429 | 182.4844572 | 82.22975513 | 1.150515868  | 1.60E-05 | 8.18E-05 | ARPC1B     |
| ENSG00000214783 | 48.6340592  | 5.911222933 | 3.021323532  | 1.61E-05 | 8.19E-05 | POLR2J4    |
| ENSG00000177103 | 21.44525935 | 0           | 6.755427878  | 1.61E-05 | 8.21E-05 | DSCAML1    |
| ENSG00000189058 | 58205.07668 | 685.2277239 | 6.408319816  | 1.61E-05 | 8.22E-05 | APOD       |
| ENSG00000013619 | 421.785853  | 123.2544267 | 1.776317296  | 1.61E-05 | 8.22E-05 | MAMLD1     |
| ENSG00000173805 | 41.0465806  | 3.32212083  | 3.646845973  | 1.62E-05 | 8.23E-05 | HAP1       |

|                 |             |             |              |          |          |             |
|-----------------|-------------|-------------|--------------|----------|----------|-------------|
| ENSG00000156471 | 749.516809  | 1778.033176 | -1.24646785  | 1.62E-05 | 8.26E-05 | PTDSS1      |
| ENSG00000147852 | 1077.912715 | 233.8881257 | 2.205036536  | 1.62E-05 | 8.27E-05 | VLDLR       |
| ENSG00000228692 | 23.08879858 | 0.387220594 | 5.900547146  | 1.63E-05 | 8.31E-05 | AL445307.1  |
| ENSG00000152556 | 1101.236219 | 2630.152036 | -1.256031039 | 1.64E-05 | 8.33E-05 | PFKM        |
| novel.608       | 26.62656475 | 0.693008929 | 5.221014453  | 1.64E-05 | 8.33E-05 | -           |
| ENSG00000114209 | 533.6059604 | 1005.278015 | -0.913752288 | 1.65E-05 | 8.40E-05 | PDCD10      |
| novel.422       | 189.4266748 | 77.78367056 | 1.28527443   | 1.65E-05 | 8.40E-05 | -           |
| ENSG00000137561 | 29.47594733 | 1.436768536 | 4.360000418  | 1.65E-05 | 8.42E-05 | TTPA        |
| ENSG00000105341 | 571.0192277 | 1038.627121 | -0.862766584 | 1.65E-05 | 8.42E-05 | DMAC2       |
| ENSG00000244879 | 485.3407058 | 1316.157531 | -1.439009994 | 1.66E-05 | 8.42E-05 | GABPB1-AS1  |
| ENSG00000103254 | 750.1778143 | 412.5713016 | 0.862500325  | 1.66E-05 | 8.43E-05 | FAM173A     |
| ENSG00000197045 | 3675.793442 | 1642.841141 | 1.161743082  | 1.66E-05 | 8.43E-05 | GMFB        |
| ENSG00000253954 | 13.72242908 | 67.62034153 | -2.305633746 | 1.66E-05 | 8.44E-05 | HMGN1P38    |
| ENSG00000148734 | 28.88487796 | 0           | 7.185334076  | 1.66E-05 | 8.44E-05 | NPFPR1      |
| ENSG00000034053 | 5.240796714 | 118.0043753 | -4.497785102 | 1.66E-05 | 8.45E-05 | APBA2       |
| ENSG00000241684 | 199.8798341 | 12.79732123 | 3.974092598  | 1.67E-05 | 8.47E-05 | ADAMTS9-AS2 |
| ENSG00000233006 | 105.7392946 | 19.3956925  | 2.447636939  | 1.67E-05 | 8.51E-05 | MIR3936HG   |
| ENSG00000258441 | 459.7119204 | 161.8765255 | 1.506023017  | 1.68E-05 | 8.54E-05 | LINC00641   |
| ENSG00000116685 | 1380.468089 | 2790.321566 | -1.015191528 | 1.70E-05 | 8.62E-05 | KIAA2013    |
| ENSG00000184613 | 34.91115975 | 0.336469917 | 6.496924811  | 1.70E-05 | 8.63E-05 | NELL2       |
| ENSG00000225231 | 47.09940212 | 0           | 7.891051121  | 1.71E-05 | 8.66E-05 | LINC02470   |
| ENSG00000162981 | 132.7503875 | 23.11333466 | 2.523123854  | 1.71E-05 | 8.67E-05 | LRATD1      |
| ENSG00000111727 | 731.7566389 | 243.7434143 | 1.585349235  | 1.71E-05 | 8.67E-05 | HCFC2       |
| ENSG00000106771 | 2763.135319 | 1328.863205 | 1.055971966  | 1.71E-05 | 8.68E-05 | TMEM245     |
| ENSG00000269044 | 189.394835  | 67.65418677 | 1.487468435  | 1.72E-05 | 8.73E-05 | AC024075.2  |
| ENSG00000147862 | 1227.11195  | 214.7529716 | 2.513559966  | 1.72E-05 | 8.74E-05 | NFIB        |
| ENSG00000133739 | 538.8780003 | 185.8430023 | 1.534497687  | 1.73E-05 | 8.75E-05 | LRRCC1      |
| ENSG00000138030 | 131.5200848 | 32.19686653 | 2.026302575  | 1.73E-05 | 8.75E-05 | KHK         |
| ENSG00000108578 | 468.3433903 | 1085.56617  | -1.213192804 | 1.73E-05 | 8.75E-05 | BLMH        |
| ENSG00000183780 | 99.22653903 | 5.501493098 | 4.180714894  | 1.73E-05 | 8.76E-05 | SLC35F3     |
| ENSG00000267481 | 52.66421179 | 14.76667432 | 1.836932047  | 1.73E-05 | 8.76E-05 | AC011477.2  |
| ENSG00000132702 | 33.30766636 | 0.336469917 | 6.429161756  | 1.74E-05 | 8.79E-05 | HAPLN2      |
| ENSG00000123178 | 282.0691977 | 542.3261943 | -0.943187757 | 1.74E-05 | 8.79E-05 | SPRYD7      |
| ENSG00000264364 | 3087.229043 | 1704.038995 | 0.857267973  | 1.74E-05 | 8.79E-05 | DYNLL2      |
| ENSG00000148308 | 785.9857494 | 1343.434536 | -0.773254285 | 1.74E-05 | 8.82E-05 | GTF3C5      |
| ENSG00000196465 | 469.6930045 | 1175.0387   | -1.322832262 | 1.74E-05 | 8.82E-05 | MYL6B       |
| ENSG00000181036 | 37.30612138 | 1.00940975  | 5.144765823  | 1.74E-05 | 8.83E-05 | FCRL6       |
| ENSG00000169813 | 2791.067547 | 4926.226651 | -0.819711829 | 1.75E-05 | 8.83E-05 | HNRNPF      |
| novel.626       | 91.54087603 | 12.67703504 | 2.855487222  | 1.75E-05 | 8.84E-05 | -           |
| ENSG00000226149 | 40.61304475 | 5.869800472 | 2.806715197  | 1.75E-05 | 8.86E-05 | AL356124.1  |
| ENSG00000277531 | 29.3123312  | 0.672939833 | 5.369313551  | 1.76E-05 | 8.90E-05 | PNMA8C      |
| ENSG00000169032 | 899.0061721 | 2143.668194 | -1.2536819   | 1.77E-05 | 8.96E-05 | MAP2K1      |
| ENSG00000203709 | 175.9352029 | 42.17995889 | 2.057926414  | 1.78E-05 | 8.97E-05 | MIR29B2CHG  |
| ENSG00000176623 | 1781.288093 | 816.9055348 | 1.124362414  | 1.78E-05 | 8.98E-05 | RMDN1       |
| ENSG00000171223 | 11662.61089 | 2257.642743 | 2.36901539   | 1.78E-05 | 8.99E-05 | JUNB        |
| ENSG00000130164 | 522.0047733 | 2021.611474 | -1.953244734 | 1.78E-05 | 9.00E-05 | LDLR        |
| ENSG00000174444 | 17868.94947 | 37030.14701 | -1.051250931 | 1.79E-05 | 9.04E-05 | RPL4        |
| ENSG00000096717 | 700.3973603 | 342.5069177 | 1.031471836  | 1.80E-05 | 9.07E-05 | SIRT1       |
| ENSG00000132481 | 354.1722261 | 170.3697529 | 1.054411673  | 1.80E-05 | 9.07E-05 | AC087289.1  |
| ENSG00000256223 | 275.2514202 | 98.59174297 | 1.479325259  | 1.80E-05 | 9.10E-05 | ZNF10       |
| ENSG00000140873 | 1.835020366 | 707.4478401 | -8.592904021 | 1.81E-05 | 9.13E-05 | ADAMTS18    |

|                 |             |             |              |          |          |            |
|-----------------|-------------|-------------|--------------|----------|----------|------------|
| ENSG00000008735 | 57.54664884 | 12.49410143 | 2.199625873  | 1.81E-05 | 9.15E-05 | MAPK8IP2   |
| ENSG00000179066 | 15.45798357 | 0           | 6.283860266  | 1.81E-05 | 9.15E-05 | AC020907.1 |
| ENSG00000100284 | 615.71948   | 1285.068738 | -1.061226631 | 1.82E-05 | 9.15E-05 | TOM1       |
| ENSG00000186153 | 245.1888059 | 82.15667079 | 1.575887968  | 1.82E-05 | 9.18E-05 | WVOX       |
| ENSG00000205300 | 0           | 29.11989439 | -7.443358461 | 1.83E-05 | 9.23E-05 | AL356414.1 |
| ENSG00000160654 | 36.61021553 | 0           | 7.527454176  | 1.83E-05 | 9.23E-05 | CD3G       |
| ENSG00000284543 | 1.203193503 | 89.79499217 | -6.217337581 | 1.83E-05 | 9.24E-05 | LINC01226  |
| ENSG00000122986 | 202.9664258 | 61.52605659 | 1.719800031  | 1.84E-05 | 9.25E-05 | HVCN1      |
| ENSG00000154553 | 465.3001482 | 121.2193909 | 1.941040769  | 1.84E-05 | 9.25E-05 | PDLIM3     |
| ENSG00000245164 | 34.66305026 | 0.387220594 | 6.486542     | 1.84E-05 | 9.25E-05 | LINC00861  |
| ENSG00000173114 | 118.3562717 | 19.06063525 | 2.624591041  | 1.84E-05 | 9.27E-05 | LRRN3      |
| ENSG00000072310 | 4394.954432 | 1636.385194 | 1.425340555  | 1.84E-05 | 9.28E-05 | SREBF1     |
| ENSG00000282849 | 0           | 15.06069429 | -6.494118819 | 1.85E-05 | 9.29E-05 | AL359834.1 |
| ENSG00000232949 | 4.539734085 | 169.3117161 | -5.220379503 | 1.85E-05 | 9.31E-05 | AC002480.2 |
| novel.197       | 115.6041488 | 7.012677428 | 4.036275177  | 1.85E-05 | 9.31E-05 | -          |
| ENSG00000164841 | 58.12056622 | 4.717595299 | 3.629355327  | 1.86E-05 | 9.35E-05 | TMEM74     |
| ENSG00000254944 | 29.21669754 | 0.713078025 | 5.348798527  | 1.86E-05 | 9.35E-05 | ATP5PBP5   |
| ENSG00000141012 | 340.1663715 | 761.6934367 | -1.162526545 | 1.86E-05 | 9.35E-05 | GALNS      |
| ENSG00000188811 | 720.7529547 | 246.8013449 | 1.545125727  | 1.86E-05 | 9.37E-05 | NHLRC3     |
| ENSG00000180822 | 218.9616152 | 533.3860658 | -1.28432818  | 1.87E-05 | 9.37E-05 | PSMG4      |
| ENSG00000136827 | 682.3176169 | 1365.547126 | -1.001178275 | 1.87E-05 | 9.40E-05 | TOR1A      |
| ENSG00000099622 | 7774.844397 | 3875.699935 | 1.004387064  | 1.87E-05 | 9.40E-05 | CIRBP      |
| ENSG00000244480 | 46.27531119 | 7.601744858 | 2.612076088  | 1.88E-05 | 9.42E-05 | AC005154.2 |
| ENSG00000197134 | 27.67889243 | 1.406086955 | 4.276793577  | 1.88E-05 | 9.43E-05 | ZNF257     |
| novel.428       | 16.11878689 | 80.83492296 | -2.325827123 | 1.90E-05 | 9.54E-05 | -          |
| ENSG00000107949 | 777.3813579 | 1370.92421  | -0.818622981 | 1.90E-05 | 9.54E-05 | BCCIP      |
| ENSG00000162889 | 1450.168862 | 2721.93701  | -0.908292546 | 1.91E-05 | 9.59E-05 | MAPKAPK2   |
| ENSG00000243660 | 99.41421577 | 38.16457234 | 1.383144648  | 1.91E-05 | 9.60E-05 | ZNF487     |
| ENSG00000141314 | 22.972964   | 0.387220594 | 5.894043852  | 1.91E-05 | 9.61E-05 | RHBDL3     |
| ENSG00000177963 | 1564.987566 | 3001.514417 | -0.939644382 | 1.92E-05 | 9.61E-05 | RIC8A      |
| ENSG00000178209 | 9100.898035 | 21738.15906 | -1.256151556 | 1.92E-05 | 9.61E-05 | PLEC       |
| ENSG00000235109 | 185.7860653 | 17.33583572 | 3.415125885  | 1.92E-05 | 9.64E-05 | ZSCAN31    |
| ENSG00000122705 | 1790.669158 | 3822.217871 | -1.093994682 | 1.92E-05 | 9.64E-05 | CLTA       |
| ENSG00000170634 | 313.1822301 | 135.6638038 | 1.20726087   | 1.92E-05 | 9.64E-05 | ACYP2      |
| ENSG00000185658 | 1489.581292 | 791.1234383 | 0.913247516  | 1.93E-05 | 9.66E-05 | BRWD1      |
| ENSG00000239779 | 416.6632828 | 217.2880185 | 0.939174365  | 1.93E-05 | 9.69E-05 | WBP1       |
| ENSG00000223947 | 3.312578714 | 28.41054078 | -3.09308079  | 1.94E-05 | 9.71E-05 | AC016738.1 |
| ENSG00000104112 | 24.31817652 | 0.356539013 | 5.976952506  | 1.94E-05 | 9.71E-05 | SCG3       |
| ENSG00000184515 | 27.78484036 | 0.387220594 | 6.167420558  | 1.94E-05 | 9.72E-05 | BEX5       |
| ENSG00000272512 | 33.40538004 | 3.159256312 | 3.383937044  | 1.94E-05 | 9.73E-05 | AL645608.7 |
| ENSG00000004455 | 1839.417688 | 2971.432215 | -0.691906718 | 1.95E-05 | 9.77E-05 | AK2        |
| ENSG00000248994 | 30.12088015 | 0           | 7.245839619  | 1.95E-05 | 9.77E-05 | AC124852.1 |
| ENSG00000137414 | 1112.12236  | 541.6761014 | 1.037287968  | 1.96E-05 | 9.82E-05 | FAM8A1     |
| ENSG00000175294 | 6.669248947 | 40.99540268 | -2.617177229 | 1.96E-05 | 9.82E-05 | CATSPER1   |
| ENSG00000168826 | 125.4518628 | 50.45451519 | 1.313052919  | 1.96E-05 | 9.82E-05 | ZBTB49     |
| ENSG00000042493 | 1132.640574 | 2487.161547 | -1.134642868 | 1.97E-05 | 9.83E-05 | CAPG       |
| ENSG00000144596 | 33.27715116 | 1.793307549 | 4.212070044  | 1.97E-05 | 9.83E-05 | GRIP2      |
| ENSG00000119431 | 289.6256202 | 100.6883175 | 1.522380619  | 1.97E-05 | 9.84E-05 | HDHD3      |
| ENSG00000255717 | 581.5459529 | 1133.279027 | -0.962658072 | 1.97E-05 | 9.84E-05 | SNHG1      |
| ENSG00000287837 | 50.26925016 | 10.47528193 | 2.266399878  | 1.98E-05 | 9.87E-05 | AL590064.1 |
| ENSG00000198825 | 1672.91393  | 785.3750802 | 1.09129943   | 2.00E-05 | 1.00E-04 | INPP5F     |

|                 |             |             |              |          |             |            |
|-----------------|-------------|-------------|--------------|----------|-------------|------------|
| ENSG0000001167  | 366.7287864 | 660.3684772 | -0.84821169  | 2.02E-05 | 0.000100798 | NFYA       |
| ENSG00000107625 | 750.6731631 | 1467.677311 | -0.967159557 | 2.02E-05 | 0.000100906 | DDX50      |
| ENSG00000159423 | 989.4422386 | 412.4469527 | 1.261944462  | 2.03E-05 | 0.000101147 | ALDH4A1    |
| ENSG00000137547 | 429.9656661 | 1031.184636 | -1.262389095 | 2.03E-05 | 0.000101154 | MRPL15     |
| ENSG00000143157 | 1822.374349 | 862.1146092 | 1.079785754  | 2.03E-05 | 0.000101367 | POGK       |
| ENSG00000064205 | 35.56233298 | 2.954969332 | 3.61180364   | 2.04E-05 | 0.000101883 | CCN5       |
| ENSG00000160948 | 304.2043645 | 69.55361917 | 2.129817355  | 2.04E-05 | 0.000101946 | VPS28      |
| ENSG00000179889 | 110.7658586 | 288.6610501 | -1.383110268 | 2.05E-05 | 0.000102214 | PDXDC1     |
| ENSG00000170113 | 567.7242999 | 268.8454008 | 1.077970074  | 2.07E-05 | 0.000103033 | NIPA1      |
| ENSG00000128578 | 34.20472617 | 226.632179  | -2.728605332 | 2.07E-05 | 0.00010328  | STRIP2     |
| ENSG00000130713 | 388.7379343 | 906.3695453 | -1.221313856 | 2.09E-05 | 0.000103943 | EXOSC2     |
| ENSG00000166869 | 16.7593893  | 0           | 6.399881297  | 2.09E-05 | 0.000103977 | CHP2       |
| ENSG00000273253 | 52.67180495 | 14.67462957 | 1.841877728  | 2.09E-05 | 0.000104074 | AL022328.4 |
| ENSG00000255189 | 15.50959698 | 0           | 6.288214244  | 2.09E-05 | 0.000104218 | GLYATL1P1  |
| ENSG00000165915 | 1506.579117 | 2925.668948 | -0.957412355 | 2.10E-05 | 0.000104824 | SLC39A13   |
| ENSG00000234232 | 16.79943514 | 0           | 6.405152189  | 2.11E-05 | 0.00010503  | AC243772.3 |
| ENSG00000108479 | 396.3882219 | 872.1143637 | -1.137826864 | 2.12E-05 | 0.000105534 | GALK1      |
| ENSG00000186132 | 173.1158651 | 65.19654409 | 1.405286988  | 2.12E-05 | 0.000105677 | C2orf76    |
| ENSG00000103549 | 813.2490124 | 1554.766312 | -0.93501774  | 2.12E-05 | 0.000105677 | RNF40      |
| ENSG00000274272 | 40.92419269 | 7.002064943 | 2.529751186  | 2.13E-05 | 0.000105775 | AC069281.2 |
| ENSG00000169181 | 39.40164483 | 0           | 7.633510598  | 2.13E-05 | 0.00010601  | GSG1L      |
| novel.5         | 28.2575675  | 0.672939833 | 5.317072096  | 2.13E-05 | 0.000106053 | -          |
| ENSG00000141934 | 38.37439048 | 486.4689051 | -3.664243761 | 2.14E-05 | 0.000106261 | PLPP2      |
| ENSG00000104435 | 11.05686356 | 343.8021192 | -4.96041822  | 2.14E-05 | 0.000106285 | STMN2      |
| ENSG00000148600 | 36.54961312 | 2.587817834 | 3.842038754  | 2.14E-05 | 0.000106292 | CDHR1      |
| ENSG00000118898 | 7.95937184  | 48.30338435 | -2.606500889 | 2.14E-05 | 0.000106395 | PPL        |
| ENSG00000269837 | 99.24257956 | 24.02137145 | 2.041584144  | 2.14E-05 | 0.000106534 | IPO5P1     |
| ENSG00000197165 | 27.38823015 | 1.722487775 | 3.950308942  | 2.15E-05 | 0.000106802 | SULT1A2    |
| ENSG00000182326 | 10943.27502 | 2147.762693 | 2.349137944  | 2.15E-05 | 0.000106865 | C1S        |
| ENSG00000111581 | 579.6578082 | 1093.630484 | -0.91612373  | 2.16E-05 | 0.000107052 | NUP107     |
| ENSG00000272692 | 36.04594386 | 6.53212782  | 2.472593761  | 2.16E-05 | 0.000107119 | AC010997.4 |
| ENSG00000105707 | 24.53988776 | 0.743759607 | 5.087307479  | 2.16E-05 | 0.000107379 | HPN        |
| ENSG00000038210 | 361.8389704 | 738.4197714 | -1.028933533 | 2.17E-05 | 0.000107677 | PI4K2B     |
| ENSG00000259683 | 120.7447242 | 15.50914966 | 2.968706257  | 2.17E-05 | 0.000107712 | AC243562.2 |
| ENSG00000099338 | 45.60566106 | 3.068367442 | 3.860218111  | 2.17E-05 | 0.000107823 | CATSPERG   |
| ENSG00000174370 | 114.5747981 | 13.73475533 | 3.069364115  | 2.19E-05 | 0.000108406 | C11orf45   |
| ENSG00000034971 | 29.5040258  | 0           | 7.21598068   | 2.19E-05 | 0.000108619 | MYOC       |
| ENSG00000188001 | 28.24148353 | 3.169868797 | 3.13811735   | 2.19E-05 | 0.000108732 | TPRG1      |
| ENSG00000057608 | 3479.171592 | 6534.687513 | -0.909423469 | 2.20E-05 | 0.000108871 | GDI2       |
| novel.363       | 58.3366934  | 0.774441189 | 6.304699557  | 2.20E-05 | 0.000108964 | -          |
| ENSG00000142405 | 16.4510334  | 0           | 6.373098165  | 2.21E-05 | 0.000109371 | NLRP12     |
| ENSG00000197728 | 1329.712578 | 3413.804503 | -1.360356099 | 2.21E-05 | 0.000109371 | RPS26      |
| ENSG00000081923 | 119.2247111 | 657.4677509 | -2.463709361 | 2.21E-05 | 0.000109583 | ATP8B1     |
| ENSG00000131236 | 2738.85382  | 4911.090317 | -0.842453404 | 2.22E-05 | 0.000110199 | CAP1       |
| ENSG00000178338 | 261.234311  | 123.312883  | 1.082122509  | 2.23E-05 | 0.0001103   | ZNF354B    |
| ENSG00000034677 | 946.3987765 | 466.1407778 | 1.02147001   | 2.23E-05 | 0.000110324 | RNF19A     |
| ENSG00000255274 | 16.11495468 | 0           | 6.343531637  | 2.23E-05 | 0.000110324 | SMIM35     |
| ENSG00000164093 | 0           | 14.86933155 | -6.473811011 | 2.23E-05 | 0.000110341 | PITX2      |
| ENSG00000226026 | 32.94315282 | 0.713078025 | 5.522555664  | 2.23E-05 | 0.000110392 | AC092802.1 |
| ENSG00000113108 | 737.0381925 | 338.6410862 | 1.122169552  | 2.23E-05 | 0.000110392 | APBB3      |
| ENSG00000236816 | 17.36954813 | 0           | 6.453399488  | 2.23E-05 | 0.000110539 | ANKRD20A7P |

|                 |             |             |              |          |             |            |
|-----------------|-------------|-------------|--------------|----------|-------------|------------|
| ENSG00000198914 | 40.29390386 | 0           | 7.665851673  | 2.24E-05 | 0.000110949 | POU3F3     |
| ENSG00000166780 | 50.14442623 | 150.2766379 | -1.581414355 | 2.24E-05 | 0.000110954 | BMERB1     |
| ENSG00000187773 | 23.62638762 | 0           | 6.895279538  | 2.25E-05 | 0.000111421 | DIPK1C     |
| ENSG00000214193 | 123.5158378 | 480.5619327 | -1.959414092 | 2.27E-05 | 0.000112131 | SH3D21     |
| ENSG00000117228 | 1684.033677 | 745.5383765 | 1.175132335  | 2.27E-05 | 0.000112384 | GBP1       |
| ENSG00000181333 | 5.775664997 | 81.53246103 | -3.819366316 | 2.28E-05 | 0.000112665 | HEPHL1     |
| ENSG00000227487 | 74.81552088 | 4.044655466 | 4.220394481  | 2.28E-05 | 0.000112665 | NCAM1-AS1  |
| ENSG00000272398 | 37.15142333 | 0.387220594 | 6.586649158  | 2.28E-05 | 0.000112777 | CD24       |
| ENSG00000138698 | 2440.592346 | 1254.609877 | 0.960053738  | 2.29E-05 | 0.000112931 | RAP1GDS1   |
| ENSG00000167103 | 12.93436579 | 69.10028352 | -2.413574977 | 2.29E-05 | 0.000113041 | PIP5KL1    |
| ENSG00000011007 | 588.841971  | 1187.279891 | -1.011969677 | 2.29E-05 | 0.000113063 | ELOA       |
| ENSG00000261026 | 35.17783233 | 0           | 7.471033478  | 2.29E-05 | 0.000113063 | AC105046.1 |
| ENSG00000255400 | 0           | 27.12242825 | -7.34093992  | 2.29E-05 | 0.000113148 | AC124276.2 |
| ENSG00000229140 | 14.81480259 | 0           | 6.222912631  | 2.31E-05 | 0.000113739 | CCDC26     |
| ENSG00000163933 | 302.6542235 | 632.4294275 | -1.063603352 | 2.31E-05 | 0.000113811 | RFT1       |
| ENSG00000115919 | 143.6850495 | 848.8370736 | -2.562307273 | 2.31E-05 | 0.000114011 | KYNU       |
| ENSG0000016391  | 59.06489377 | 4.248942446 | 3.788947031  | 2.31E-05 | 0.000114126 | CHDH       |
| ENSG00000242715 | 9.098344172 | 43.68142982 | -2.264794027 | 2.32E-05 | 0.00011421  | CCDC169    |
| ENSG00000092200 | 61.16708491 | 6.705604823 | 3.207514176  | 2.32E-05 | 0.0001144   | RPGRIP1    |
| ENSG00000227066 | 25.60543611 | 0           | 7.012966343  | 2.33E-05 | 0.000114652 | Z98257.1   |
| ENSG00000070495 | 516.6911336 | 1156.379271 | -1.161885312 | 2.33E-05 | 0.000114659 | JMJD6      |
| ENSG00000155363 | 905.1030889 | 1853.296005 | -1.03371885  | 2.33E-05 | 0.000114784 | MOV10      |
| ENSG00000177700 | 1546.309146 | 4043.829452 | -1.386997513 | 2.34E-05 | 0.000115126 | POLR2L     |
| ENSG00000287023 | 0           | 15.21294633 | -6.507214713 | 2.34E-05 | 0.000115239 | AC018978.1 |
| ENSG00000284734 | 15.06645922 | 0           | 6.247682951  | 2.35E-05 | 0.000115673 | AC099063.4 |
| ENSG00000087085 | 49.72958075 | 7.022134039 | 2.8106531    | 2.36E-05 | 0.000115949 | ACHE       |
| ENSG00000127863 | 2357.486114 | 532.0868862 | 2.147049456  | 2.36E-05 | 0.000116235 | TNFRSF19   |
| ENSG00000152127 | 998.951595  | 2282.960934 | -1.192488585 | 2.36E-05 | 0.000116285 | MGAT5      |
| novel.995       | 125.3550892 | 2.292641984 | 5.79996319   | 2.37E-05 | 0.000116381 | -          |
| ENSG00000102034 | 185.8314105 | 611.5938243 | -1.71891636  | 2.37E-05 | 0.000116381 | ELF4       |
| ENSG00000204253 | 76.12189777 | 183.2931397 | -1.268239965 | 2.37E-05 | 0.00011649  | HNRNPCP2   |
| ENSG00000285928 | 64.81742327 | 13.73847974 | 2.228418541  | 2.37E-05 | 0.00011657  | AC103591.4 |
| ENSG00000231752 | 15.39494477 | 0           | 6.278524757  | 2.38E-05 | 0.000117034 | EMBP1      |
| ENSG00000122592 | 1.22840902  | 45.54838247 | -5.224387496 | 2.38E-05 | 0.000117068 | HOXA7      |
| ENSG00000283236 | 45.79728473 | 6.186201292 | 2.897360698  | 2.38E-05 | 0.000117126 | AC074141.1 |
| ENSG00000125484 | 429.6495467 | 779.8107422 | -0.860299087 | 2.40E-05 | 0.00011786  | GTF3C4     |
| ENSG00000117394 | 1104.36841  | 5400.770354 | -2.289987594 | 2.40E-05 | 0.000117875 | SLC2A1     |
| ENSG00000169594 | 5.544138023 | 78.76903001 | -3.833823129 | 2.40E-05 | 0.00011791  | BNC1       |
| ENSG00000135622 | 159.1480477 | 338.3722728 | -1.087503077 | 2.41E-05 | 0.000118111 | SEMA4F     |
| ENSG00000139329 | 8460.301241 | 609.757074  | 3.794465975  | 2.41E-05 | 0.000118414 | LUM        |
| ENSG00000135744 | 94.50673358 | 7.186282827 | 3.700171873  | 2.42E-05 | 0.000118774 | AGT        |
| ENSG00000161395 | 620.4887754 | 265.805964  | 1.222017896  | 2.42E-05 | 0.000118861 | PGAP3      |
| ENSG00000216866 | 17.89710798 | 58.89450454 | -1.7208743   | 2.42E-05 | 0.000118892 | RPS2P55    |
| ENSG00000198732 | 223.7644439 | 1249.635142 | -2.481689082 | 2.42E-05 | 0.00011891  | SMOC1      |
| ENSG00000242498 | 1261.821769 | 710.6187526 | 0.828529557  | 2.43E-05 | 0.000118956 | ARPIN      |
| ENSG00000250579 | 23.46284312 | 0           | 6.885671104  | 2.43E-05 | 0.000119015 | AC022424.1 |
| ENSG00000126001 | 621.2770532 | 1926.327156 | -1.632358523 | 2.44E-05 | 0.000119592 | CEP250     |
| ENSG00000142694 | 693.7931137 | 1724.122898 | -1.313398594 | 2.44E-05 | 0.000119693 | EVA1B      |
| ENSG00000139209 | 80.05232758 | 4.872287477 | 4.0250159    | 2.44E-05 | 0.000119728 | SLC38A4    |
| ENSG00000177150 | 187.0139765 | 487.0208606 | -1.380671778 | 2.45E-05 | 0.000120029 | FAM210A    |
| ENSG00000172167 | 75.84599454 | 178.4974854 | -1.233257929 | 2.45E-05 | 0.000120044 | MTBP       |



|                 |             |             |              |          |             |            |
|-----------------|-------------|-------------|--------------|----------|-------------|------------|
| ENSG00000248587 | 3.576843098 | 84.1730845  | -4.549533006 | 2.45E-05 | 0.000120146 | GDNF-AS1   |
| ENSG00000165511 | 110.5272091 | 33.71031543 | 1.713364321  | 2.46E-05 | 0.000120252 | C10orf25   |
| ENSG00000165030 | 239.7546768 | 957.2478669 | -1.996841624 | 2.46E-05 | 0.00012039  | NFIL3      |
| ENSG00000143499 | 438.361409  | 842.6472453 | -0.943073221 | 2.46E-05 | 0.000120585 | SMYD2      |
| ENSG00000233029 | 27.18887112 | 0.336469917 | 6.138055458  | 2.47E-05 | 0.000120677 | AC244453.2 |
| ENSG00000186310 | 341.2164332 | 24.89402194 | 3.771331136  | 2.47E-05 | 0.000120741 | NAP1L3     |
| ENSG00000167645 | 992.5043448 | 1880.075559 | -0.921709617 | 2.47E-05 | 0.000121013 | YIF1B      |
| ENSG00000187650 | 177.0264931 | 80.33597371 | 1.141004742  | 2.48E-05 | 0.000121106 | VMAC       |
| ENSG00000170919 | 746.6675459 | 272.7892784 | 1.453001671  | 2.50E-05 | 0.000122122 | TPT1-AS1   |
| ENSG00000196843 | 717.4138229 | 183.4256138 | 1.96877279   | 2.50E-05 | 0.000122192 | ARID5A     |
| ENSG00000210194 | 55.40513913 | 12.82111474 | 2.108080829  | 2.51E-05 | 0.000122799 | MT-TE      |
| ENSG00000215022 | 46.50837655 | 11.83177408 | 1.974729529  | 2.51E-05 | 0.000122799 | AL008729.1 |
| ENSG00000275557 | 61.99959608 | 10.55787006 | 2.560582388  | 2.51E-05 | 0.000122834 | AC242842.1 |
| ENSG00000225125 | 23.62617416 | 0.743759607 | 5.032754141  | 2.52E-05 | 0.0001232   | RANP4      |
| ENSG00000136842 | 48.41939912 | 1.762625967 | 4.765479751  | 2.52E-05 | 0.000123347 | TMOD1      |
| ENSG00000183199 | 23.04728563 | 73.6692228  | -1.67589809  | 2.53E-05 | 0.000123347 | HSP90AB3P  |
| ENSG00000216937 | 115.7100529 | 33.26417182 | 1.794209357  | 2.53E-05 | 0.000123407 | CCDC7      |
| ENSG00000270091 | 43.97945944 | 4.382281258 | 3.339395482  | 2.54E-05 | 0.000123993 | AC015726.1 |
| ENSG00000101773 | 312.7059001 | 651.2360866 | -1.058415556 | 2.54E-05 | 0.000124031 | RBBP8      |
| ENSG00000285587 | 22.29948164 | 0.356539013 | 5.851542486  | 2.54E-05 | 0.000124073 | AC012470.1 |
| ENSG00000141431 | 66.00923518 | 2.567748738 | 4.696585886  | 2.54E-05 | 0.000124073 | ASXL3      |
| novel.95        | 38.69850253 | 0           | 7.607591093  | 2.55E-05 | 0.00012458  | -          |
| ENSG00000183423 | 30.87821513 | 2.598430319 | 3.599368615  | 2.56E-05 | 0.00012478  | LRIT3      |
| novel.136       | 0           | 15.38642333 | -6.52207153  | 2.56E-05 | 0.000124943 | -          |
| ENSG00000177054 | 167.4191804 | 324.9215669 | -0.956352958 | 2.57E-05 | 0.000125214 | ZDHHC13    |
| ENSG00000143458 | 653.864823  | 285.3928908 | 1.195211455  | 2.57E-05 | 0.000125214 | GABPB2     |
| ENSG00000099968 | 749.3096589 | 1292.955457 | -0.787029133 | 2.58E-05 | 0.000125515 | BCL2L13    |
| ENSG00000187815 | 174.0611338 | 79.25600097 | 1.133159092  | 2.58E-05 | 0.000125515 | ZFP69      |
| ENSG00000184220 | 263.950592  | 556.7112175 | -1.077093692 | 2.58E-05 | 0.000125654 | CMSS1      |
| ENSG00000271303 | 41.10557336 | 146.2889789 | -1.831959254 | 2.58E-05 | 0.000125661 | SRXN1      |
| ENSG00000120053 | 357.6768554 | 802.5921149 | -1.166502958 | 2.59E-05 | 0.000125914 | GOT1       |
| ENSG00000171703 | 1003.188062 | 491.8789867 | 1.028882554  | 2.60E-05 | 0.000126421 | TCEA2      |
| ENSG00000264278 | 77.12601697 | 26.76144131 | 1.524098565  | 2.60E-05 | 0.000126584 | ZNF236-DT  |
| ENSG00000271605 | 278.5299923 | 82.70503926 | 1.754458574  | 2.62E-05 | 0.000127531 | MILR1      |
| ENSG00000223547 | 185.3305767 | 55.67876535 | 1.730821332  | 2.63E-05 | 0.000127781 | ZNF844     |
| ENSG00000127561 | 9.107119713 | 69.53555786 | -2.931492541 | 2.63E-05 | 0.000128192 | SYNGR3     |
| ENSG00000004660 | 110.1062376 | 231.5048173 | -1.07284477  | 2.64E-05 | 0.0001283   | CAMKK1     |
| ENSG00000177369 | 17.35568672 | 0           | 6.452282986  | 2.64E-05 | 0.000128628 | AC004797.1 |
| ENSG00000223458 | 45.45207447 | 1.345879667 | 5.02677859   | 2.65E-05 | 0.000129019 | LMO7DN-IT1 |
| ENSG00000213347 | 169.9154035 | 497.3838787 | -1.549312401 | 2.65E-05 | 0.000129085 | MXD3       |
| ENSG00000139269 | 2.772695836 | 35.5968236  | -3.6938157   | 2.66E-05 | 0.000129179 | INHBE      |
| ENSG00000258451 | 47.84846011 | 1.10029862  | 5.459715178  | 2.66E-05 | 0.000129447 | AL163636.1 |
| ENSG00000101298 | 76.18543476 | 367.0196143 | -2.26882355  | 2.67E-05 | 0.000129659 | SNPH       |
| ENSG00000184925 | 31.01675793 | 3.984448178 | 2.967352327  | 2.67E-05 | 0.000129773 | LCN12      |
| ENSG00000169241 | 341.4304091 | 765.2475848 | -1.164541425 | 2.67E-05 | 0.000129906 | SLC50A1    |
| ENSG00000164930 | 199.2485607 | 780.0697611 | -1.96949822  | 2.67E-05 | 0.000129906 | FZD6       |
| ENSG00000133740 | 269.1095459 | 105.8295    | 1.347083519  | 2.68E-05 | 0.000130249 | E2F5       |
| novel.774       | 17.99657386 | 0           | 6.502678928  | 2.69E-05 | 0.000130568 | -          |
| ENSG00000167552 | 18740.33377 | 7517.435103 | 1.317839187  | 2.70E-05 | 0.000131136 | TUBA1A     |
| ENSG00000268182 | 32.21458083 | 4.62670643  | 2.793922787  | 2.71E-05 | 0.000131597 | SMIM17     |
| ENSG00000076258 | 115.7557538 | 21.6874354  | 2.40878598   | 2.71E-05 | 0.000131648 | FMO4       |

|                 |             |             |              |          |             |                           |
|-----------------|-------------|-------------|--------------|----------|-------------|---------------------------|
| ENSG00000179300 | 0           | 15.08179087 | -6.492521846 | 2.72E-05 | 0.000131865 | RTL3                      |
| ENSG00000172531 | 1645.857703 | 3002.65812  | -0.867419706 | 2.73E-05 | 0.000132266 | PPP1CA                    |
| ENSG00000110619 | 75.94442023 | 278.7226598 | -1.875393454 | 2.73E-05 | 0.000132347 | CARS                      |
| novel.628       | 84.02934363 | 9.192049696 | 3.187478187  | 2.73E-05 | 0.000132548 | -                         |
| ENSG00000143156 | 138.620006  | 355.6936432 | -1.359553898 | 2.74E-05 | 0.000132706 | NME7                      |
| ENSG00000215769 | 81.7086602  | 13.20473931 | 2.637274861  | 2.74E-05 | 0.000132871 | ARHGAP27P1-BPTFP1-KPNA2P3 |
| ENSG00000280422 | 27.45725245 | 1.518200796 | 4.231812264  | 2.76E-05 | 0.000133677 | AC115284.2                |
| ENSG00000171873 | 14.75706313 | 249.0657201 | -4.078590701 | 2.76E-05 | 0.000133962 | ADRA1D                    |
| ENSG00000285884 | 14.24594325 | 0           | 6.166043528  | 2.77E-05 | 0.000134042 | AL022345.4                |
| ENSG00000164099 | 9.411714671 | 61.29262908 | -2.706774173 | 2.79E-05 | 0.000135048 | PRSS12                    |
| ENSG00000084764 | 585.8474485 | 243.9317765 | 1.265049027  | 2.79E-05 | 0.000135193 | MAPRE3                    |
| ENSG00000150175 | 14.58452927 | 0           | 6.199585902  | 2.79E-05 | 0.000135194 | FRMPD2B                   |
| ENSG00000141030 | 690.4619176 | 1388.237387 | -1.007830533 | 2.79E-05 | 0.000135282 | COPS3                     |
| ENSG00000115942 | 327.0972243 | 619.5925503 | -0.921206096 | 2.80E-05 | 0.000135642 | ORC2                      |
| ENSG00000171453 | 245.2264863 | 479.9077218 | -0.969209869 | 2.81E-05 | 0.000135736 | POLR1C                    |
| ENSG00000249307 | 260.4952225 | 8.552231589 | 4.920287195  | 2.81E-05 | 0.000135867 | LINC01088                 |
| ENSG00000151689 | 849.4417062 | 334.6153568 | 1.343144536  | 2.81E-05 | 0.000136011 | INPP1                     |
| ENSG00000099817 | 2087.425403 | 3840.340045 | -0.879520016 | 2.82E-05 | 0.000136526 | POLR2E                    |
| ENSG00000011260 | 485.0384875 | 892.003902  | -0.879190807 | 2.83E-05 | 0.000136745 | UTP18                     |
| ENSG00000144158 | 34.11765459 | 94.47100226 | -1.467283781 | 2.83E-05 | 0.000136938 | AL078621.1                |
| ENSG00000153395 | 9.224279216 | 93.37476606 | -3.344146178 | 2.84E-05 | 0.00013723  | LPCAT1                    |
| ENSG00000234665 | 113.4386769 | 3.761376372 | 4.896835314  | 2.84E-05 | 0.000137365 | AL512625.3                |
| ENSG00000119688 | 1211.583393 | 551.8414857 | 1.134789662  | 2.85E-05 | 0.000137937 | ABCD4                     |
| ENSG00000129680 | 388.1848304 | 803.8693922 | -1.050488987 | 2.86E-05 | 0.000137946 | MAP7D3                    |
| ENSG00000011258 | 518.6591123 | 222.1041142 | 1.224892393  | 2.86E-05 | 0.000137946 | MBTD1                     |
| ENSG00000170369 | 59.566127   | 2.129777466 | 4.798239672  | 2.86E-05 | 0.000138136 | CST2                      |
| ENSG00000128709 | 0.307102255 | 23.46067385 | -6.174405056 | 2.86E-05 | 0.000138136 | HOXD9                     |
| ENSG00000108821 | 19391.43127 | 136942.3757 | -2.820083018 | 2.86E-05 | 0.000138196 | COL1A1                    |
| ENSG00000117625 | 1105.798326 | 498.9054056 | 1.148105116  | 2.87E-05 | 0.00013849  | RCOR3                     |
| ENSG00000125740 | 5372.015183 | 75.63331042 | 6.150576528  | 2.87E-05 | 0.000138559 | FOSB                      |
| ENSG00000247775 | 14.56439962 | 0           | 6.197797898  | 2.87E-05 | 0.000138579 | SNCA-AS1                  |
| ENSG00000158169 | 165.6084779 | 361.3491518 | -1.126388443 | 2.89E-05 | 0.000139238 | FANCC                     |
| ENSG00000171621 | 163.2828938 | 464.4228664 | -1.508489811 | 2.90E-05 | 0.000139658 | SPSB1                     |
| ENSG00000164692 | 30715.21541 | 110566.4812 | -1.847893309 | 2.90E-05 | 0.000139977 | COL1A2                    |
| ENSG00000225210 | 15.86079075 | 0           | 6.320239386  | 2.91E-05 | 0.000140306 | DUXAP9                    |
| ENSG00000168062 | 166.3677069 | 41.4310622  | 2.009947831  | 2.92E-05 | 0.000140621 | BATF2                     |
| ENSG00000140398 | 643.2062119 | 157.7298551 | 2.02841518   | 2.93E-05 | 0.000141044 | NEIL1                     |
| ENSG00000069966 | 124.2849101 | 714.2026583 | -2.522986701 | 2.93E-05 | 0.000141055 | GNB5                      |
| ENSG00000162129 | 271.2174636 | 541.3002983 | -0.996635585 | 2.95E-05 | 0.000141998 | CLPB                      |
| ENSG00000286694 | 15.96881871 | 0           | 6.331495661  | 2.96E-05 | 0.000142678 | AL161935.3                |
| ENSG00000178226 | 45.57091455 | 8.947624524 | 2.346212781  | 2.97E-05 | 0.000142851 | PRSS36                    |
| ENSG00000166348 | 295.7662973 | 116.1550984 | 1.347471098  | 2.97E-05 | 0.000143131 | USP54                     |
| ENSG00000130475 | 191.2252243 | 52.46233702 | 1.868633605  | 2.98E-05 | 0.000143432 | FCHO1                     |
| ENSG00000213930 | 431.9024897 | 228.0090098 | 0.921162112  | 2.98E-05 | 0.00014347  | GALT                      |
| ENSG00000119927 | 299.3025956 | 1683.253271 | -2.491517726 | 2.99E-05 | 0.000143711 | GPAM                      |
| ENSG00000148346 | 0.616711807 | 80.72810895 | -7.045588553 | 2.99E-05 | 0.000143768 | LCN2                      |
| ENSG00000093217 | 40.91004655 | 121.9159959 | -1.573200042 | 3.00E-05 | 0.000144243 | XYLB                      |
| ENSG00000163867 | 473.0740795 | 250.3244478 | 0.918183788  | 3.00E-05 | 0.000144333 | ZMYM6                     |
| ENSG00000215866 | 23.40474765 | 1.029478846 | 4.455817358  | 3.00E-05 | 0.0001444   | LINC01356                 |
| ENSG00000108309 | 35.99425918 | 5.196860638 | 2.816599922  | 3.00E-05 | 0.0001444   | RUNDC3A                   |
| ENSG00000270872 | 210.5291172 | 65.28725738 | 1.689999764  | 3.01E-05 | 0.000144596 | SRGAP2D                   |

|                 |             |             |              |          |             |            |
|-----------------|-------------|-------------|--------------|----------|-------------|------------|
| ENSG00000175334 | 1731.474413 | 3113.211919 | -0.846481216 | 3.05E-05 | 0.000146802 | BANF1      |
| ENSG00000110057 | 1601.541907 | 777.3294691 | 1.042983749  | 3.06E-05 | 0.000146826 | UNC93B1    |
| ENSG00000238197 | 175.3835393 | 41.1622484  | 2.089251385  | 3.06E-05 | 0.000146826 | PAXBP1-AS1 |
| ENSG00000280254 | 75.42821449 | 16.24717707 | 2.208355905  | 3.06E-05 | 0.000146969 | AC233723.2 |
| ENSG00000111554 | 321.1392806 | 163.8351849 | 0.969716433  | 3.06E-05 | 0.000147091 | MDM1       |
| ENSG00000285791 | 27.85218174 | 1.029478846 | 4.712125752  | 3.06E-05 | 0.000147112 | AC009879.3 |
| ENSG00000121988 | 77.38150581 | 172.6140372 | -1.157788384 | 3.07E-05 | 0.000147287 | ZRANB3     |
| ENSG00000101856 | 4425.667859 | 2203.714453 | 1.00580384   | 3.10E-05 | 0.0001486   | PGRMC1     |
| ENSG00000182732 | 40.70835059 | 0.743759607 | 5.809247496  | 3.10E-05 | 0.000148627 | RGS6       |
| ENSG00000132623 | 8.246273173 | 62.58377687 | -2.927706705 | 3.10E-05 | 0.000148902 | ANKEF1     |
| ENSG00000091428 | 131.3150969 | 10.71957871 | 3.621739927  | 3.10E-05 | 0.000148902 | RAPGEF4    |
| ENSG00000169683 | 324.5617816 | 572.9845682 | -0.819916338 | 3.10E-05 | 0.000148902 | LRRC45     |
| ENSG00000205086 | 17.11280564 | 0           | 6.431597402  | 3.11E-05 | 0.000148902 | C2orf91    |
| ENSG00000276953 | 0           | 14.09501875 | -6.401070653 | 3.11E-05 | 0.000149024 | TRBV12-4   |
| ENSG00000100422 | 999.3745888 | 2040.3112   | -1.02972634  | 3.11E-05 | 0.000149265 | CERK       |
| ENSG00000168522 | 1888.433129 | 1039.878015 | 0.860789639  | 3.12E-05 | 0.000149294 | FNTA       |
| ENSG00000128266 | 172.1416917 | 35.36874311 | 2.288147025  | 3.12E-05 | 0.000149582 | GNAZ       |
| ENSG00000269892 | 35.03867662 | 1.702418679 | 4.320074375  | 3.13E-05 | 0.000149869 | AC125494.2 |
| ENSG00000277851 | 15.22269565 | 0           | 6.261176471  | 3.13E-05 | 0.000149963 | LINC02391  |
| ENSG00000072133 | 11.79170378 | 51.16990496 | -2.117408694 | 3.13E-05 | 0.000150017 | RPS6KA6    |
| ENSG00000178295 | 137.7891479 | 402.9296404 | -1.548095358 | 3.14E-05 | 0.000150147 | GEN1       |
| ENSG00000248144 | 452.3590675 | 3.781445468 | 6.8937543    | 3.14E-05 | 0.000150148 | ADH1C      |
| ENSG00000131771 | 111.902066  | 3.741307276 | 4.882478979  | 3.14E-05 | 0.000150492 | PPP1R1B    |
| ENSG00000186577 | 1327.397142 | 522.6915864 | 1.345081502  | 3.15E-05 | 0.000150779 | SMIM29     |
| ENSG00000172869 | 1060.919896 | 511.0340122 | 1.054057537  | 3.16E-05 | 0.000151329 | DMXL1      |
| ENSG00000166448 | 203.6583412 | 8.959392885 | 4.506397264  | 3.17E-05 | 0.000151509 | TMEM130    |
| ENSG00000108582 | 1183.903053 | 3532.329967 | -1.577129301 | 3.17E-05 | 0.000151514 | CPD        |
| ENSG00000004948 | 28.51703075 | 1.762625967 | 3.998536591  | 3.17E-05 | 0.0001517   | CALCR      |
| ENSG00000103642 | 481.6165559 | 912.036155  | -0.921263185 | 3.18E-05 | 0.000152053 | LACTB      |
| ENSG00000285576 | 19.19077836 | 0           | 6.596861395  | 3.18E-05 | 0.000152131 | AL138686.2 |
| ENSG00000185652 | 70.78513922 | 3.801514564 | 4.200325709  | 3.19E-05 | 0.000152273 | NTF3       |
| ENSG00000148341 | 2801.007045 | 1103.433105 | 1.344077924  | 3.19E-05 | 0.000152284 | SH3GLB2    |
| ENSG00000213344 | 1.186824798 | 32.26023748 | -4.744966976 | 3.20E-05 | 0.000152732 | PCNPP3     |
| ENSG00000260625 | 21.74706228 | 1.080229524 | 4.335665253  | 3.20E-05 | 0.000152784 | AC026471.2 |
| ENSG00000139266 | 550.3469882 | 132.8521779 | 2.052179745  | 3.20E-05 | 0.000152833 | 9-Mar      |
| ENSG00000187510 | 37.2102739  | 1.548882377 | 4.649426039  | 3.20E-05 | 0.000152846 | C12orf74   |
| ENSG00000159086 | 1702.925042 | 503.5146459 | 1.758035187  | 3.20E-05 | 0.000152846 | PAXBP1     |
| ENSG00000122862 | 2247.841312 | 9255.129844 | -2.041754419 | 3.21E-05 | 0.000153032 | SRGN       |
| ENSG00000144824 | 2175.403012 | 586.5007934 | 1.890955699  | 3.21E-05 | 0.000153137 | PHLDB2     |
| ENSG00000137265 | 55.33682849 | 1.365948763 | 5.303705113  | 3.22E-05 | 0.000153414 | IRF4       |
| ENSG00000248485 | 43.26697143 | 2.842855491 | 3.921674367  | 3.23E-05 | 0.000154012 | PCP4L1     |
| ENSG00000172789 | 0           | 13.39126895 | -6.322935351 | 3.23E-05 | 0.000154083 | HOXC5      |
| ENSG00000163879 | 438.106549  | 189.35554   | 1.210567314  | 3.23E-05 | 0.000154175 | DNAL1      |
| ENSG00000108262 | 2596.960978 | 1098.161106 | 1.241919473  | 3.24E-05 | 0.000154559 | GIT1       |
| ENSG00000263711 | 0           | 26.05452785 | -7.286889064 | 3.24E-05 | 0.000154574 | AC079062.1 |
| ENSG00000274922 | 50.299409   | 9.07163512  | 2.455061988  | 3.25E-05 | 0.000155068 | AL139384.1 |
| ENSG00000160072 | 606.3235649 | 1264.724874 | -1.060793265 | 3.26E-05 | 0.000155581 | ATAD3B     |
| ENSG00000283689 | 0.308355904 | 18.25294394 | -5.809927819 | 3.27E-05 | 0.000155857 | AC018553.2 |
| ENSG00000135269 | 269.5971583 | 912.4772677 | -1.759430277 | 3.28E-05 | 0.000156411 | TES        |
| ENSG00000131187 | 0.307102255 | 18.42410919 | -5.82169024  | 3.28E-05 | 0.000156411 | F12        |
| ENSG00000145555 | 511.5608385 | 2719.341968 | -2.41042385  | 3.29E-05 | 0.000156601 | MYO10      |

|                 |             |             |              |          |             |            |
|-----------------|-------------|-------------|--------------|----------|-------------|------------|
| ENSG00000134352 | 5649.596226 | 3204.67565  | 0.818023285  | 3.29E-05 | 0.000156794 | IL6ST      |
| ENSG00000125245 | 37.01280926 | 2.171071533 | 4.097659588  | 3.30E-05 | 0.00015718  | GPR18      |
| novel.203       | 0           | 235.5159062 | -10.46071776 | 3.31E-05 | 0.000157706 | -          |
| ENSG00000287988 | 14.55931375 | 0           | 6.197351304  | 3.33E-05 | 0.000158553 | FO082814.1 |
| ENSG00000028310 | 753.4302888 | 1283.335453 | -0.768254903 | 3.34E-05 | 0.000158769 | BRD9       |
| ENSG00000229656 | 8.183305651 | 102.6763142 | -3.648405815 | 3.35E-05 | 0.00015921  | ITGB1-DT   |
| ENSG00000065802 | 674.5690733 | 1280.297485 | -0.924200449 | 3.36E-05 | 0.000159766 | ASB1       |
| ENSG00000161016 | 16814.52023 | 33295.70283 | -0.985635937 | 3.36E-05 | 0.000159766 | RPL8       |
| ENSG00000176769 | 49.93381218 | 1.426156051 | 5.123360021  | 3.36E-05 | 0.000159786 | TCERG1L    |
| ENSG00000163093 | 660.8883306 | 186.7934891 | 1.82197059   | 3.38E-05 | 0.000160416 | BBS5       |
| ENSG00000146476 | 379.1085381 | 796.621057  | -1.071731914 | 3.38E-05 | 0.000160416 | ARMT1      |
| ENSG00000284882 | 14.60089797 | 0           | 6.201077727  | 3.38E-05 | 0.00016059  | AL359762.1 |
| ENSG00000157087 | 91.64676796 | 3.108505634 | 4.865321133  | 3.38E-05 | 0.00016078  | ATP2B2     |
| ENSG00000197497 | 223.8820334 | 46.0191715  | 2.281754635  | 3.39E-05 | 0.00016089  | ZNF665     |
| ENSG00000168758 | 1795.609611 | 866.9057562 | 1.050897193  | 3.39E-05 | 0.000161196 | SEMA4C     |
| ENSG00000116670 | 453.9748182 | 895.8388083 | -0.980711567 | 3.40E-05 | 0.000161433 | MAD2L2     |
| ENSG00000001630 | 22.51743194 | 78.33876436 | -1.801951822 | 3.40E-05 | 0.000161491 | CYP51A1    |
| ENSG00000101745 | 1185.593168 | 482.907812  | 1.296028988  | 3.45E-05 | 0.000163663 | ANKRD12    |
| ENSG00000198848 | 4.280484296 | 128.0399221 | -4.904876647 | 3.45E-05 | 0.000163737 | CES1       |
| novel.131       | 14.74800285 | 0           | 6.216974801  | 3.48E-05 | 0.000165226 | -          |
| ENSG00000122477 | 63.31039026 | 13.8398527  | 2.201412753  | 3.48E-05 | 0.000165226 | LRRC39     |
| ENSG00000105329 | 1595.832671 | 3329.232618 | -1.06095341  | 3.49E-05 | 0.000165747 | TGFB1      |
| ENSG00000227110 | 33.82441374 | 6.45069556  | 2.389884967  | 3.51E-05 | 0.000166462 | LMCD1-AS1  |
| ENSG00000078589 | 41.26320563 | 0           | 7.700164139  | 3.54E-05 | 0.000167899 | P2RY10     |
| ENSG00000154582 | 819.6805221 | 1596.872126 | -0.962180808 | 3.55E-05 | 0.000168328 | ELOC       |
| ENSG00000273017 | 26.32963423 | 2.537067156 | 3.384103039  | 3.56E-05 | 0.000168765 | AP000240.1 |
| ENSG00000163606 | 34.30182729 | 0.672939833 | 5.602074977  | 3.56E-05 | 0.000168831 | CD200R1    |
| ENSG00000091844 | 42.93808643 | 161.652893  | -1.912890483 | 3.58E-05 | 0.000169416 | RGS17      |
| ENSG00000174738 | 1110.116175 | 510.5249172 | 1.120963604  | 3.58E-05 | 0.000169604 | NR1D2      |
| novel.385       | 27.09065889 | 0           | 7.09416979   | 3.59E-05 | 0.000170045 | -          |
| ENSG00000140545 | 3941.051025 | 6419.770125 | -0.703915473 | 3.62E-05 | 0.000171403 | MFGE8      |
| ENSG00000067334 | 726.5883088 | 1239.828271 | -0.771140935 | 3.63E-05 | 0.000171993 | DNTTIP2    |
| ENSG00000273329 | 137.9200979 | 45.01181671 | 1.619278452  | 3.65E-05 | 0.00017271  | AC078846.1 |
| ENSG00000085491 | 5.101000263 | 52.82879904 | -3.368422713 | 3.66E-05 | 0.00017325  | SLC25A24   |
| ENSG00000185187 | 990.6272128 | 327.0044812 | 1.599888137  | 3.68E-05 | 0.000174197 | SIGIRR     |
| ENSG00000125834 | 323.1426466 | 683.3642098 | -1.080041813 | 3.69E-05 | 0.000174434 | STK35      |
| ENSG00000175893 | 750.8467965 | 320.8693811 | 1.226050129  | 3.70E-05 | 0.000174878 | ZDHHC21    |
| ENSG00000136715 | 347.4838164 | 611.2084487 | -0.814468641 | 3.70E-05 | 0.000175204 | SAP130     |
| ENSG00000144134 | 331.5578787 | 149.1992809 | 1.152179576  | 3.71E-05 | 0.000175644 | RABL2A     |
| ENSG00000157637 | 2002.592865 | 3720.699353 | -0.893775257 | 3.73E-05 | 0.000176247 | SLC38A10   |
| ENSG00000171798 | 77.59529572 | 6.928805024 | 3.490764905  | 3.73E-05 | 0.000176247 | KNDC1      |
| ENSG00000073910 | 253.088528  | 59.71165246 | 2.081133464  | 3.73E-05 | 0.000176417 | FRY        |
| ENSG00000112893 | 1690.874775 | 760.7705269 | 1.151829125  | 3.73E-05 | 0.000176417 | MAN2A1     |
| ENSG00000143942 | 23.73831907 | 117.0930933 | -2.305072998 | 3.74E-05 | 0.000176561 | CHAC2      |
| ENSG00000236892 | 0.89358395  | 36.0965904  | -5.324801758 | 3.75E-05 | 0.000176969 | AL357833.1 |
| ENSG00000163462 | 95.4137951  | 332.3261228 | -1.799040294 | 3.75E-05 | 0.000177081 | TRIM46     |
| ENSG00000112242 | 233.3596342 | 484.0611862 | -1.052768365 | 3.76E-05 | 0.000177329 | E2F3       |
| ENSG00000047346 | 571.3427696 | 317.2974412 | 0.848437675  | 3.77E-05 | 0.000178026 | FAM214A    |
| novel.818       | 6.347031636 | 39.75030086 | -2.649116024 | 3.78E-05 | 0.000178388 | -          |
| ENSG00000128262 | 22.01787964 | 232.9663381 | -3.405091641 | 3.80E-05 | 0.000179108 | POM121L9P  |
| ENSG00000120279 | 70.60555383 | 4.394178013 | 3.97924231   | 3.80E-05 | 0.00017921  | MYCT1      |

|                 |             |             |              |          |             |            |
|-----------------|-------------|-------------|--------------|----------|-------------|------------|
| ENSG00000144747 | 708.8382775 | 1332.415132 | -0.910305834 | 3.81E-05 | 0.000179858 | TMF1       |
| ENSG00000135124 | 490.4809092 | 239.3489327 | 1.03632992   | 3.82E-05 | 0.000180357 | P2RX4      |
| ENSG00000167964 | 5.186676005 | 36.07596055 | -2.800330744 | 3.83E-05 | 0.000180409 | RAB26      |
| ENSG00000122224 | 22.40940399 | 0           | 6.818975358  | 3.84E-05 | 0.000180918 | LY9        |
| ENSG00000140386 | 396.3411252 | 194.0089468 | 1.032077531  | 3.84E-05 | 0.000181065 | SCAPER     |
| ENSG00000211677 | 340.7272908 | 0           | 10.74612372  | 3.85E-05 | 0.000181296 | IGLC2      |
| ENSG00000100426 | 320.5995837 | 728.3044361 | -1.183260467 | 3.85E-05 | 0.000181395 | ZBED4      |
| ENSG00000179743 | 155.1928575 | 61.14328392 | 1.345906474  | 3.85E-05 | 0.000181601 | AL450998.2 |
| ENSG00000164023 | 220.2013349 | 468.2497627 | -1.08915601  | 3.87E-05 | 0.000182064 | SGMS2      |
| ENSG00000167434 | 17.99908116 | 0           | 6.502928828  | 3.89E-05 | 0.000182951 | CA4        |
| novel.752       | 16.03053258 | 0           | 6.336593917  | 3.89E-05 | 0.000182951 | -          |
| ENSG00000007384 | 5041.311868 | 1476.99406  | 1.771170536  | 3.89E-05 | 0.000183018 | RHBDF1     |
| ENSG00000198881 | 13.96405651 | 0           | 6.13700023   | 3.89E-05 | 0.000183107 | ASB12      |
| ENSG00000175048 | 274.4648797 | 92.10206509 | 1.573058985  | 3.90E-05 | 0.000183705 | ZDHHC14    |
| ENSG00000132603 | 348.699147  | 874.6756692 | -1.327181959 | 3.91E-05 | 0.000183764 | NIP7       |
| ENSG00000226252 | 31.00447835 | 0           | 7.288961943  | 3.93E-05 | 0.000184752 | AL135960.1 |
| ENSG00000113845 | 1036.828385 | 1968.983854 | -0.925377433 | 3.93E-05 | 0.000184828 | TIMMDC1    |
| ENSG00000127995 | 569.2960523 | 275.5348706 | 1.046180817  | 3.93E-05 | 0.000184957 | CASD1      |
| novel.91        | 0.308355904 | 210.9929357 | -9.340268927 | 3.94E-05 | 0.000185142 | -          |
| ENSG00000112530 | 20.54136148 | 0.387220594 | 5.732742175  | 3.94E-05 | 0.000185197 | PACRG      |
| ENSG00000273328 | 24.15498766 | 0.336469917 | 5.965216335  | 3.95E-05 | 0.000185633 | AC099329.2 |
| ENSG00000234614 | 36.34663533 | 6.817847059 | 2.414270661  | 3.96E-05 | 0.000185847 | C2CD4D-AS1 |
| ENSG00000054118 | 2180.431487 | 3494.404829 | -0.68042176  | 3.98E-05 | 0.000186791 | THRAP3     |
| ENSG00000165895 | 609.6691516 | 170.0862514 | 1.843077481  | 3.98E-05 | 0.000186974 | ARHGAP42   |
| ENSG00000137752 | 822.5481834 | 361.1382335 | 1.186652273  | 3.98E-05 | 0.000186974 | CASP1      |
| ENSG00000089902 | 349.8313807 | 736.7156357 | -1.074770803 | 3.99E-05 | 0.000187099 | RCOR1      |
| ENSG00000250846 | 19.90570239 | 0.336469917 | 5.687670905  | 3.99E-05 | 0.000187099 | EPHA5-AS1  |
| ENSG00000075539 | 1864.855152 | 839.4427821 | 1.151821217  | 3.99E-05 | 0.000187231 | FRYL       |
| ENSG00000162613 | 1365.359006 | 2511.69526  | -0.879533372 | 4.01E-05 | 0.000188084 | FUBP1      |
| ENSG00000159216 | 743.0916662 | 1683.45092  | -1.179845752 | 4.01E-05 | 0.000188349 | RUNX1      |
| ENSG00000182782 | 24.04026419 | 0.336469917 | 5.958813721  | 4.01E-05 | 0.000188349 | HCAR2      |
| ENSG00000086232 | 1441.758503 | 2642.476804 | -0.873935259 | 4.02E-05 | 0.000188493 | EIF2AK1    |
| ENSG00000136490 | 1424.134022 | 680.6288578 | 1.065455673  | 4.05E-05 | 0.000189817 | LIMD2      |
| ENSG00000151687 | 88.64335591 | 28.11562172 | 1.652999627  | 4.05E-05 | 0.000190075 | ANKAR      |
| ENSG00000267107 | 29.53174861 | 0           | 7.217372081  | 4.07E-05 | 0.000190779 | PCAT19     |
| ENSG00000067177 | 36.88193054 | 341.6366261 | -3.212686913 | 4.07E-05 | 0.000190971 | PHKA1      |
| ENSG00000156127 | 35.5641561  | 1.060160428 | 5.053588442  | 4.08E-05 | 0.000191152 | BATF       |
| ENSG00000110080 | 2418.319357 | 957.2130886 | 1.337423925  | 4.09E-05 | 0.000191446 | ST3GAL4    |
| ENSG00000223799 | 33.7412453  | 5.717548439 | 2.558887619  | 4.09E-05 | 0.000191604 | IL10RB-DT  |
| ENSG00000227954 | 3.975889338 | 41.91991255 | -3.402436486 | 4.10E-05 | 0.000192123 | TARID      |
| ENSG00000055609 | 1593.327594 | 664.5012643 | 1.262033151  | 4.10E-05 | 0.000192198 | KMT2C      |
| ENSG00000125971 | 584.5784683 | 280.8229244 | 1.058039029  | 4.12E-05 | 0.000192797 | DYNLRB1    |
| ENSG00000166986 | 1461.27157  | 3147.19091  | -1.106945134 | 4.12E-05 | 0.000192797 | MARS       |
| ENSG00000129055 | 645.0626101 | 1349.622244 | -1.065122474 | 4.12E-05 | 0.00019297  | ANAPC13    |
| ENSG00000266274 | 21.33569301 | 0.336469917 | 5.786257249  | 4.14E-05 | 0.000193537 | RN7SL138P  |
| ENSG00000174243 | 1408.017855 | 2448.621735 | -0.798382147 | 4.16E-05 | 0.000194461 | DDX23      |
| ENSG00000254254 | 31.61889632 | 0.336469917 | 6.35547594   | 4.18E-05 | 0.000195355 | AC012349.1 |
| ENSG00000062282 | 22.42967618 | 389.0424325 | -4.117386573 | 4.19E-05 | 0.000195915 | DGAT2      |
| ENSG00000142186 | 1802.073189 | 3146.978551 | -0.80421596  | 4.19E-05 | 0.000195915 | SCYL1      |
| ENSG00000279722 | 60.37325192 | 11.16127439 | 2.421664431  | 4.21E-05 | 0.000196634 | AC007342.7 |
| ENSG00000280434 | 2.990361403 | 27.3423364  | -3.185388208 | 4.21E-05 | 0.000196879 | AL031595.3 |

|                 |             |             |              |          |             |            |
|-----------------|-------------|-------------|--------------|----------|-------------|------------|
| ENSG00000100632 | 1346.899263 | 2532.353217 | -0.910987835 | 4.21E-05 | 0.000196964 | ERH        |
| ENSG00000010379 | 528.5689748 | 1.00940975  | 9.007682501  | 4.23E-05 | 0.00019751  | SLC6A13    |
| ENSG00000198829 | 27.7456209  | 1.386017859 | 4.288563302  | 4.25E-05 | 0.000198438 | SUCNR1     |
| ENSG00000177646 | 595.8375966 | 1125.580858 | -0.917766035 | 4.25E-05 | 0.000198438 | ACAD9      |
| ENSG00000156738 | 37.86752974 | 0           | 7.57623699   | 4.25E-05 | 0.000198441 | MS4A1      |
| ENSG00000273576 | 76.83026883 | 26.28333185 | 1.542377219  | 4.25E-05 | 0.000198549 | AC009283.1 |
| ENSG00000286757 | 25.29360399 | 1.110911105 | 4.54287217   | 4.26E-05 | 0.000198905 | AL137139.1 |
| ENSG00000181074 | 22.40027244 | 0.743759607 | 4.955313368  | 4.26E-05 | 0.000199033 | OR52N4     |
| ENSG00000231890 | 3.593211803 | 34.42313667 | -3.250338227 | 4.26E-05 | 0.000199033 | DARS-AS1   |
| ENSG00000123146 | 750.1637394 | 1276.326453 | -0.766570362 | 4.27E-05 | 0.000199378 | ADGRE5     |
| ENSG00000286403 | 19.93439412 | 0           | 6.652153243  | 4.28E-05 | 0.000199532 | AC010378.2 |
| ENSG00000257219 | 8.565983187 | 77.25668981 | -3.17499783  | 4.28E-05 | 0.000199532 | LNCOG      |
| ENSG00000214050 | 10.02466553 | 52.09390125 | -2.375943739 | 4.28E-05 | 0.00019973  | FBXO16     |
| ENSG00000196605 | 221.9069162 | 85.57664977 | 1.376099471  | 4.29E-05 | 0.000200148 | ZNF846     |
| ENSG00000078674 | 2365.220145 | 1345.069473 | 0.814143052  | 4.31E-05 | 0.000201056 | PCM1       |
| ENSG00000087258 | 127.6296845 | 4.523920805 | 4.833131576  | 4.32E-05 | 0.000201333 | GNAO1      |
| ENSG00000256083 | 0.293240848 | 28.05883487 | -6.428792593 | 4.32E-05 | 0.000201534 | AC090673.1 |
| ENSG00000170037 | 574.3126026 | 1061.425819 | -0.885881869 | 4.34E-05 | 0.000202021 | CNTROB     |
| ENSG00000075461 | 48.93170138 | 0.356539013 | 6.984252326  | 4.38E-05 | 0.000204061 | CACNG4     |
| ENSG00000066044 | 1219.005215 | 2169.006788 | -0.831441613 | 4.39E-05 | 0.000204274 | ELAVL1     |
| ENSG00000081148 | 26.13940675 | 1.773238453 | 3.871543602  | 4.39E-05 | 0.000204319 | IMPG2      |
| ENSG00000105808 | 43.86029084 | 7.643038925 | 2.529442217  | 4.39E-05 | 0.000204626 | RASA4      |
| ENSG00000251136 | 235.7709652 | 108.2662217 | 1.123375285  | 4.40E-05 | 0.000204941 | AF117829.1 |
| ENSG00000173418 | 889.1057767 | 1534.769622 | -0.787803612 | 4.41E-05 | 0.00020508  | NAA20      |
| ENSG00000273409 | 19.63524104 | 0           | 6.629275649  | 4.42E-05 | 0.000205486 | AP003481.1 |
| ENSG00000130311 | 851.2463098 | 1645.881675 | -0.95105377  | 4.43E-05 | 0.000206203 | DDA1       |
| ENSG00000124783 | 2317.052239 | 4249.906858 | -0.875207765 | 4.43E-05 | 0.000206257 | SSR1       |
| ENSG00000287226 | 14.82608543 | 0           | 6.223878432  | 4.45E-05 | 0.000206882 | AC084740.1 |
| ENSG00000185880 | 53.43332781 | 14.24727079 | 1.902022213  | 4.45E-05 | 0.00020693  | TRIM69     |
| ENSG00000102312 | 188.6132104 | 466.5434787 | -1.30612511  | 4.46E-05 | 0.000207387 | PORCN      |
| ENSG00000013364 | 3543.541315 | 7546.072689 | -1.090493165 | 4.48E-05 | 0.000208254 | MVP        |
| ENSG00000272108 | 13.62672415 | 0           | 6.102080383  | 4.48E-05 | 0.000208403 | AC244517.1 |
| ENSG00000165527 | 2137.091673 | 3625.896967 | -0.762670312 | 4.50E-05 | 0.000208963 | ARF6       |
| ENSG00000125746 | 633.4480845 | 1402.384518 | -1.146505403 | 4.50E-05 | 0.000208963 | EML2       |
| ENSG00000153317 | 943.1452302 | 2056.00258  | -1.124349639 | 4.51E-05 | 0.000209362 | ASAP1      |
| ENSG00000188051 | 30.42386545 | 3.566546002 | 3.086594976  | 4.51E-05 | 0.000209377 | TMEM221    |
| ENSG00000149273 | 11813.37732 | 27508.76753 | -1.21947706  | 4.51E-05 | 0.000209518 | RPS3       |
| ENSG00000179051 | 48.8092429  | 275.5450972 | -2.497753127 | 4.51E-05 | 0.00020954  | RCC2       |
| ENSG00000161956 | 354.1654162 | 678.2533362 | -0.937813008 | 4.55E-05 | 0.000211159 | SENP3      |
| ENSG00000214021 | 1027.373968 | 335.7871859 | 1.613677364  | 4.56E-05 | 0.000211406 | TTLL3      |
| ENSG00000248487 | 179.5317765 | 69.6506726  | 1.365037368  | 4.57E-05 | 0.000212254 | ABHD14A    |
| ENSG00000138867 | 1123.157244 | 1915.010145 | -0.769643996 | 4.58E-05 | 0.000212533 | GUCD1      |
| novel.812       | 21.96186454 | 0           | 6.791822253  | 4.60E-05 | 0.000213579 | -          |
| ENSG00000158467 | 595.8937379 | 208.0675518 | 1.51809263   | 4.62E-05 | 0.00021424  | AHCYL2     |
| ENSG00000100314 | 28.37243317 | 2.180528143 | 3.71138891   | 4.64E-05 | 0.000215237 | CABP7      |
| ENSG00000169972 | 128.1934309 | 318.4939885 | -1.313786182 | 4.66E-05 | 0.000216043 | PUSL1      |
| ENSG00000068366 | 880.2947893 | 2357.876107 | -1.42134811  | 4.66E-05 | 0.000216175 | ACSL4      |
| ENSG00000176083 | 30.40924894 | 0           | 7.259706911  | 4.67E-05 | 0.000216206 | ZNF683     |
| ENSG00000211689 | 15.88099168 | 0           | 6.322050975  | 4.69E-05 | 0.00021711  | TRGC1      |
| ENSG00000287733 | 31.63089117 | 4.963176346 | 2.661510616  | 4.70E-05 | 0.000217623 | AC083862.3 |
| ENSG00000233621 | 35.10694347 | 138.6910872 | -1.980243308 | 4.71E-05 | 0.000218366 | LINC01137  |

|                 |             |             |              |          |             |            |
|-----------------|-------------|-------------|--------------|----------|-------------|------------|
| ENSG00000196335 | 29.51961157 | 0.356539013 | 6.256479837  | 4.72E-05 | 0.00021861  | STK31      |
| ENSG00000154518 | 1625.776174 | 3577.391556 | -1.137873737 | 4.73E-05 | 0.000219003 | ATP5MC3    |
| ENSG00000163121 | 20.85215341 | 0.387220594 | 5.75431249   | 4.74E-05 | 0.000219264 | NEURL3     |
| ENSG00000287397 | 19.31825179 | 0           | 6.60471403   | 4.74E-05 | 0.000219611 | AP002528.1 |
| ENSG00000268754 | 0           | 20.17471001 | -6.912871693 | 4.77E-05 | 0.000220821 | LINC01081  |
| ENSG00000119487 | 1119.532005 | 1905.795924 | -0.767465048 | 4.79E-05 | 0.000221772 | MAPKAP1    |
| ENSG00000182083 | 14.95209175 | 0           | 6.235082251  | 4.80E-05 | 0.000222076 | OR6B2      |
| ENSG00000231711 | 196.4620904 | 70.82320366 | 1.469243446  | 4.80E-05 | 0.000222103 | LINC00899  |
| ENSG00000164051 | 181.8618328 | 374.6928337 | -1.043461565 | 4.81E-05 | 0.000222231 | CCDC51     |
| ENSG00000008869 | 1004.764675 | 467.771816  | 1.103141386  | 4.81E-05 | 0.000222307 | HEATR5B    |
| ENSG00000113851 | 900.2267348 | 449.2616514 | 1.003405735  | 4.82E-05 | 0.000222608 | CRBN       |
| ENSG00000172888 | 1282.927532 | 644.631084  | 0.992542305  | 4.82E-05 | 0.000222962 | ZNF621     |
| ENSG00000197077 | 540.9384191 | 166.3426792 | 1.701157861  | 4.84E-05 | 0.000223476 | KIAA1671   |
| ENSG00000162433 | 182.7542191 | 1131.14877  | -2.630123349 | 4.84E-05 | 0.000223663 | AK4        |
| ENSG00000150457 | 2915.715262 | 998.4156151 | 1.546115562  | 4.88E-05 | 0.000225212 | LATS2      |
| ENSG00000197258 | 135.5365178 | 372.8203116 | -1.460050039 | 4.90E-05 | 0.000226404 | EIF4BP6    |
| ENSG00000125804 | 46.11843403 | 0.336469917 | 6.899829934  | 4.90E-05 | 0.000226514 | FAM182A    |
| ENSG00000122025 | 27.95841406 | 0           | 7.13840198   | 4.92E-05 | 0.000227084 | FLT3       |
| ENSG00000154174 | 930.7115865 | 1612.443922 | -0.793037536 | 4.92E-05 | 0.000227329 | TOMM70     |
| ENSG00000141985 | 1838.649939 | 3043.351635 | -0.726997501 | 4.93E-05 | 0.000227486 | SH3GL1     |
| ENSG00000267886 | 0.894837599 | 19.65787502 | -4.442191805 | 4.93E-05 | 0.000227683 | AC074135.1 |
| ENSG00000238227 | 657.5399621 | 1268.701685 | -0.948358273 | 4.94E-05 | 0.000228117 | TMEM250    |
| ENSG00000123983 | 811.3358939 | 1697.60901  | -1.065358041 | 4.95E-05 | 0.000228471 | ACSL3      |
| ENSG00000104689 | 70.19397075 | 190.0233427 | -1.436682864 | 4.96E-05 | 0.000228915 | TNFRSF10A  |
| ENSG00000099308 | 523.0142468 | 239.2607407 | 1.128926962  | 4.97E-05 | 0.000229072 | MAST3      |
| ENSG00000161981 | 208.4187627 | 636.0189279 | -1.610177125 | 4.97E-05 | 0.000229104 | SNRNP25    |
| ENSG00000250138 | 14.12878375 | 0           | 6.155249002  | 4.98E-05 | 0.000229591 | AC139495.3 |
| ENSG00000231672 | 22.63813893 | 0.743759607 | 4.970379659  | 4.98E-05 | 0.000229604 | DIRC3      |
| ENSG00000183876 | 581.2799926 | 147.2124616 | 1.982985661  | 4.98E-05 | 0.000229604 | ARSI       |
| novel.183       | 14.70265769 | 0           | 6.212840774  | 4.99E-05 | 0.000229848 | -          |
| ENSG00000235217 | 215.138913  | 100.5096562 | 1.099861221  | 5.00E-05 | 0.000230363 | TSPY26P    |
| ENSG00000205250 | 993.2278309 | 1727.150018 | -0.798169133 | 5.01E-05 | 0.00023058  | E2F4       |
| ENSG00000120832 | 268.507664  | 128.378845  | 1.06318317   | 5.01E-05 | 0.00023078  | MTERF2     |
| ENSG00000159352 | 1935.952034 | 3262.524586 | -0.752977918 | 5.02E-05 | 0.000231161 | PSMD4      |
| ENSG00000169251 | 564.5313717 | 1328.230322 | -1.234619593 | 5.04E-05 | 0.000231871 | NMD3       |
| ENSG00000237949 | 32.81589285 | 0.713078025 | 5.517361016  | 5.04E-05 | 0.0002321   | LINC00844  |
| ENSG00000185669 | 65.47306946 | 12.08552747 | 2.445847933  | 5.05E-05 | 0.000232473 | SNAI3      |
| ENSG00000123119 | 247.8291114 | 62.6967898  | 1.98409134   | 5.05E-05 | 0.000232473 | NECAB1     |
| ENSG00000153214 | 432.6847826 | 885.826327  | -1.033568662 | 5.06E-05 | 0.00023292  | TMEM87B    |
| novel.350       | 25.96805526 | 0.387220594 | 6.071731772  | 5.09E-05 | 0.000234085 | -          |
| ENSG00000187166 | 18.46818989 | 0           | 6.541975839  | 5.11E-05 | 0.000235113 | H1FNT      |
| ENSG00000135392 | 208.8636245 | 389.1803729 | -0.89795082  | 5.12E-05 | 0.000235272 | DNAJC14    |
| ENSG00000155975 | 447.5349724 | 813.7081827 | -0.862586766 | 5.12E-05 | 0.000235481 | VPS37A     |
| ENSG00000258810 | 21.73208941 | 0           | 6.774866532  | 5.12E-05 | 0.000235481 | AL133371.2 |
| ENSG00000229224 | 17.37588764 | 0           | 6.453673857  | 5.15E-05 | 0.000236529 | AC105398.1 |
| ENSG00000161048 | 39.65050977 | 7.378673051 | 2.411745582  | 5.16E-05 | 0.000236936 | NAPEPLD    |
| ENSG00000163817 | 445.8256107 | 0.713078025 | 9.283935313  | 5.16E-05 | 0.000237245 | SLC6A20    |
| ENSG00000225096 | 52.89408567 | 1.029478846 | 5.647488299  | 5.18E-05 | 0.000237834 | AL445250.1 |
| ENSG00000115216 | 1763.438022 | 3025.159518 | -0.77868812  | 5.18E-05 | 0.000238008 | NRBP1      |
| ENSG00000280560 | 14.64373584 | 0           | 6.205025297  | 5.20E-05 | 0.00023865  | LINC01374  |
| ENSG00000232884 | 15.83063191 | 0           | 6.317818026  | 5.21E-05 | 0.000238962 | AF127936.2 |

|                 |             |             |              |          |             |             |
|-----------------|-------------|-------------|--------------|----------|-------------|-------------|
| ENSG00000272425 | 35.90711632 | 0.672939833 | 5.672307625  | 5.21E-05 | 0.000239225 | AC009902.3  |
| ENSG00000184207 | 379.0017363 | 826.9653206 | -1.125982006 | 5.23E-05 | 0.00024     | PGP         |
| ENSG00000266313 | 19.32681386 | 0.387220594 | 5.644881862  | 5.24E-05 | 0.000240614 | AC026254.2  |
| ENSG00000137463 | 137.3150093 | 10.14125216 | 3.752929553  | 5.25E-05 | 0.000240761 | MGARP       |
| novel.172       | 19.04206382 | 0           | 6.586127797  | 5.27E-05 | 0.000241569 | -           |
| ENSG00000174456 | 529.9946722 | 223.2058727 | 1.248191691  | 5.27E-05 | 0.000241739 | C12orf76    |
| ENSG00000264247 | 300.8387202 | 153.3634518 | 0.971017843  | 5.29E-05 | 0.000242724 | LINC00909   |
| ENSG00000168792 | 407.1021694 | 138.6598573 | 1.551775605  | 5.30E-05 | 0.000242724 | ABHD15      |
| ENSG00000278156 | 54.34654321 | 11.14937764 | 2.287494942  | 5.32E-05 | 0.000243892 | TSC22D1-AS1 |
| novel.886       | 1541.320403 | 0.774441189 | 10.98423274  | 5.33E-05 | 0.000244034 | -           |
| ENSG00000185633 | 645.5473303 | 73.83662928 | 3.126149625  | 5.36E-05 | 0.000245562 | NDUFA4L2    |
| ENSG00000114450 | 976.1713814 | 1819.249278 | -0.89827387  | 5.37E-05 | 0.000246013 | GNB4        |
| ENSG00000149231 | 1311.300764 | 646.3726009 | 1.020892602  | 5.38E-05 | 0.000246177 | CCDC82      |
| ENSG00000169570 | 137.3055652 | 63.09256791 | 1.121167975  | 5.40E-05 | 0.00024711  | DTWD2       |
| ENSG00000247416 | 32.67158    | 1.782695063 | 4.18944839   | 5.40E-05 | 0.000247284 | AP000802.1  |
| ENSG00000103226 | 6.423860566 | 45.03792197 | -2.815178054 | 5.40E-05 | 0.000247382 | NOMO3       |
| ENSG00000111752 | 729.484334  | 368.6133864 | 0.985203793  | 5.41E-05 | 0.000247429 | PHC1        |
| ENSG00000170396 | 18.450781   | 82.14344258 | -2.153372954 | 5.41E-05 | 0.000247496 | ZNF804A     |
| ENSG00000136153 | 573.8669701 | 5116.007587 | -3.156285165 | 5.43E-05 | 0.000248227 | LMO7        |
| ENSG00000165494 | 1299.665724 | 676.4327204 | 0.94206473   | 5.44E-05 | 0.00024877  | PCF11       |
| ENSG00000189350 | 30.59013107 | 1.386017859 | 4.431358048  | 5.45E-05 | 0.000249264 | TOGARAM2    |
| ENSG00000184441 | 98.97086455 | 23.37081246 | 2.078601511  | 5.46E-05 | 0.000249543 | AP001062.1  |
| ENSG00000229337 | 32.18846767 | 3.372871508 | 3.28669109   | 5.47E-05 | 0.000249876 | AC079305.3  |
| ENSG00000104064 | 174.6882308 | 334.8301622 | -0.939097172 | 5.47E-05 | 0.000249969 | GABPB1      |
| ENSG00000132681 | 18.58277082 | 0           | 6.550391642  | 5.47E-05 | 0.0002502   | ATP1A4      |
| ENSG00000106415 | 298.9745537 | 97.85487143 | 1.610854179  | 5.48E-05 | 0.000250362 | GLCCI1      |
| ENSG00000124795 | 1643.790673 | 3159.781034 | -0.942889231 | 5.49E-05 | 0.000250614 | DEK         |
| ENSG00000100453 | 13.31202873 | 0           | 6.068498791  | 5.50E-05 | 0.000251137 | GZMB        |
| ENSG00000286431 | 23.63376733 | 76.53317487 | -1.693636678 | 5.51E-05 | 0.000251733 | BX842570.1  |
| ENSG00000286662 | 16.21323818 | 0           | 6.351831927  | 5.52E-05 | 0.000251826 | AC025160.1  |
| ENSG00000012232 | 1056.638968 | 1764.625699 | -0.739794076 | 5.52E-05 | 0.000251897 | EXTL3       |
| ENSG00000184381 | 435.7903259 | 146.6348242 | 1.572236047  | 5.52E-05 | 0.000252149 | PLA2G6      |
| ENSG00000185482 | 137.7255675 | 29.99524181 | 2.19236917   | 5.53E-05 | 0.000252385 | STAC3       |
| ENSG00000176293 | 241.8399851 | 80.09090624 | 1.592303483  | 5.55E-05 | 0.000253311 | ZNF135      |
| ENSG00000060688 | 420.0009623 | 784.4060439 | -0.901568231 | 5.56E-05 | 0.000253819 | SNRNP40     |
| ENSG00000205937 | 1802.145403 | 3279.654944 | -0.863811052 | 5.57E-05 | 0.000253864 | RNPS1       |
| ENSG00000148154 | 1159.695679 | 3694.071135 | -1.671354638 | 5.57E-05 | 0.000253954 | UGCG        |
| ENSG00000127191 | 299.6040429 | 603.3659222 | -1.009735091 | 5.58E-05 | 0.000254244 | TRAF2       |
| ENSG00000138107 | 2662.68265  | 4463.010008 | -0.745111503 | 5.61E-05 | 0.000255627 | ACTR1A      |
| ENSG00000104918 | 24.86253235 | 0           | 6.969035962  | 5.61E-05 | 0.000255673 | RETN        |
| ENSG00000114771 | 0           | 14.33114319 | -6.425543032 | 5.62E-05 | 0.000256082 | AADAC       |
| novel.293       | 14.4195173  | 0           | 6.184651618  | 5.62E-05 | 0.000256166 | -           |
| ENSG00000171425 | 231.8317161 | 608.183465  | -1.391111193 | 5.63E-05 | 0.000256463 | ZNF581      |
| ENSG00000152503 | 88.8289248  | 12.60377513 | 2.827027085  | 5.68E-05 | 0.000258732 | TRIM36      |
| ENSG00000236698 | 96.29165108 | 215.7732381 | -1.163133983 | 5.70E-05 | 0.000259401 | EIF1AXP1    |
| ENSG00000260633 | 28.38955732 | 1.110911105 | 4.707728583  | 5.71E-05 | 0.000259834 | AC010207.1  |
| ENSG00000228824 | 220.5694832 | 13.57176241 | 4.029991025  | 5.73E-05 | 0.000260876 | MIR4500HG   |
| ENSG00000105928 | 385.1611469 | 1045.246225 | -1.440131897 | 5.74E-05 | 0.000261323 | GSDME       |
| ENSG00000105880 | 20.23064047 | 0           | 6.671423842  | 5.75E-05 | 0.000261722 | DLX5        |
| ENSG00000099203 | 155.2070036 | 399.8308488 | -1.365474221 | 5.75E-05 | 0.00026183  | TMED1       |
| ENSG00000106852 | 35.50369588 | 1.834601616 | 4.291453881  | 5.77E-05 | 0.000262428 | LHX6        |



|                 |             |             |              |          |             |            |
|-----------------|-------------|-------------|--------------|----------|-------------|------------|
| ENSG00000223704 | 26.19603475 | 2.079026788 | 3.624265706  | 5.79E-05 | 0.000263328 | LINC01422  |
| ENSG00000139546 | 343.9820775 | 740.2864804 | -1.106092799 | 5.80E-05 | 0.000263736 | TARBP2     |
| ENSG00000181027 | 533.8890733 | 946.773008  | -0.826657837 | 5.82E-05 | 0.000264849 | FKRP       |
| ENSG00000168421 | 52.33873173 | 4.799027558 | 3.460667207  | 5.85E-05 | 0.000266028 | RHOH       |
| ENSG00000143319 | 426.5741503 | 856.4312228 | -1.00599032  | 5.86E-05 | 0.000266171 | ISG20L2    |
| ENSG00000233830 | 52.63809863 | 140.2160945 | -1.414197408 | 5.89E-05 | 0.000267858 | EIF4HP1    |
| ENSG00000070366 | 314.3520451 | 678.8048212 | -1.110687664 | 5.90E-05 | 0.000267858 | SMG6       |
| ENSG00000152582 | 425.3328369 | 119.3489707 | 1.835016712  | 5.92E-05 | 0.000269047 | SPEF2      |
| ENSG00000100281 | 360.2201481 | 743.5624009 | -1.045115898 | 5.92E-05 | 0.000269069 | HMGXB4     |
| ENSG00000242299 | 2366.736945 | 4509.089598 | -0.929941879 | 5.94E-05 | 0.000269907 | AC073861.1 |
| ENSG00000124143 | 0           | 11.90259386 | -6.153504865 | 5.95E-05 | 0.000270185 | ARHGAP40   |
| ENSG00000122696 | 129.0771278 | 268.9324369 | -1.059560244 | 5.96E-05 | 0.000270789 | SLC25A51   |
| ENSG00000237451 | 19.83263441 | 0.387220594 | 5.682797915  | 5.99E-05 | 0.000271999 | CDK2AP2P2  |
| ENSG00000005302 | 870.3433214 | 508.830684  | 0.774765892  | 6.00E-05 | 0.000272116 | MSL3       |
| ENSG00000245498 | 101.8293074 | 27.34349228 | 1.893850915  | 6.01E-05 | 0.000272476 | AP000866.1 |
| ENSG00000088205 | 1114.5871   | 1823.016387 | -0.709761553 | 6.01E-05 | 0.000272755 | DDX18      |
| ENSG00000151360 | 34.1697662  | 0           | 7.427958544  | 6.03E-05 | 0.000273511 | ALLC       |
| ENSG00000231231 | 0           | 16.25175339 | -6.600940262 | 6.04E-05 | 0.000273981 | LINC01423  |
| ENSG00000182379 | 12.4839196  | 71.85152663 | -2.528021697 | 6.04E-05 | 0.000274082 | NXP4       |
| ENSG00000236411 | 15.32445536 | 0           | 6.272312418  | 6.05E-05 | 0.000274144 | NDUFAF4P3  |
| ENSG00000267074 | 15.57381815 | 0           | 6.293905662  | 6.08E-05 | 0.000275375 | AC015911.3 |
| ENSG00000167186 | 435.4185165 | 230.6879733 | 0.915689918  | 6.08E-05 | 0.00027555  | COQ7       |
| ENSG00000267414 | 30.94508579 | 0.743759607 | 5.414916923  | 6.10E-05 | 0.000276225 | AC120049.1 |
| ENSG00000129351 | 4480.700998 | 8058.110055 | -0.846706279 | 6.10E-05 | 0.000276237 | ILF3       |
| ENSG00000235387 | 62.75492161 | 8.102363562 | 2.94456573   | 6.10E-05 | 0.000276323 | SPAAR      |
| ENSG00000281005 | 71.86684245 | 10.01968171 | 2.827512247  | 6.11E-05 | 0.000276909 | LINC00921  |
| ENSG00000180549 | 13.70606037 | 0           | 6.109684322  | 6.14E-05 | 0.000277993 | FUT7       |
| ENSG00000254952 | 13.70606037 | 0           | 6.109684322  | 6.14E-05 | 0.000277993 | AP001257.1 |
| ENSG00000140832 | 36.45161435 | 1.783850939 | 4.348204543  | 6.14E-05 | 0.000278089 | MARVELD3   |
| ENSG00000175866 | 1111.961569 | 411.1076228 | 1.435058122  | 6.14E-05 | 0.000278089 | BAIAP2     |
| ENSG00000288075 | 63.32013471 | 11.7314286  | 2.429128151  | 6.15E-05 | 0.000278122 | AC108519.1 |
| ENSG00000003756 | 3315.970472 | 1547.357763 | 1.099701269  | 6.19E-05 | 0.000280173 | RBM5       |
| ENSG00000237596 | 2.447971227 | 34.17627135 | -3.806990138 | 6.19E-05 | 0.000280189 | AL138828.1 |
| ENSG00000259956 | 983.7638183 | 1695.758612 | -0.785688413 | 6.20E-05 | 0.000280318 | RBM15B     |
| ENSG00000163815 | 498.273154  | 20.71345912 | 4.585204889  | 6.22E-05 | 0.000281147 | CLEC3B     |
| ENSG00000170439 | 79.23632766 | 5.199300783 | 3.916555338  | 6.25E-05 | 0.000282594 | METTL7B    |
| ENSG00000105784 | 44.42115792 | 2.231278821 | 4.337677274  | 6.25E-05 | 0.000282699 | RUNDC3B    |
| ENSG00000186493 | 36.87587611 | 0.387220594 | 6.576008644  | 6.26E-05 | 0.000282824 | C5orf38    |
| ENSG00000178307 | 388.0067403 | 703.762788  | -0.859177161 | 6.26E-05 | 0.000282942 | TMEM11     |
| ENSG00000077514 | 266.0651347 | 502.9506562 | -0.91859293  | 6.27E-05 | 0.000283287 | POLD3      |
| novel.567       | 26.75912405 | 0           | 7.075097045  | 6.28E-05 | 0.000283746 | -          |
| ENSG00000129255 | 769.8501947 | 1401.456497 | -0.864378897 | 6.30E-05 | 0.000284431 | MPDU1      |
| ENSG00000166523 | 23.02367977 | 0           | 6.858105634  | 6.31E-05 | 0.000284982 | CLEC4E     |
| ENSG00000079102 | 175.3893921 | 30.67635399 | 2.511996191  | 6.32E-05 | 0.000285135 | RUNX1T1    |
| ENSG00000160185 | 39.90649681 | 0.774441189 | 5.759034121  | 6.33E-05 | 0.0002856   | UBASH3A    |
| ENSG00000103266 | 893.9405747 | 1624.348491 | -0.861692945 | 6.33E-05 | 0.0002856   | STUB1      |
| ENSG00000117707 | 30.09057876 | 0.356539013 | 6.282427071  | 6.33E-05 | 0.000285695 | PROX1      |
| ENSG00000183784 | 14.32785805 | 0           | 6.173666801  | 6.35E-05 | 0.000286323 | C9orf66    |
| ENSG00000128652 | 0.308355904 | 22.9223571  | -6.141221258 | 6.35E-05 | 0.000286323 | HOXD3      |
| ENSG00000114796 | 1332.285049 | 393.0316794 | 1.761828921  | 6.35E-05 | 0.000286323 | KLHL24     |
| ENSG00000124217 | 132.7427669 | 260.9427007 | -0.9754164   | 6.36E-05 | 0.00028695  | MOCS3      |

|                 |             |             |              |          |             |            |
|-----------------|-------------|-------------|--------------|----------|-------------|------------|
| ENSG0000009694  | 13.98927203 | 0           | 6.139428256  | 6.38E-05 | 0.000287457 | TENM1      |
| ENSG00000149547 | 1347.782348 | 2574.921681 | -0.934079989 | 6.39E-05 | 0.000287805 | EI24       |
| ENSG0000006638  | 295.7350426 | 121.1272178 | 1.289289995  | 6.39E-05 | 0.000288179 | TBXA2R     |
| ENSG00000169118 | 251.3404526 | 460.6279831 | -0.873638333 | 6.40E-05 | 0.0002884   | CSNK1G1    |
| ENSG00000124562 | 866.7033964 | 1733.207097 | -1.000015588 | 6.41E-05 | 0.000288721 | SNRPC      |
| ENSG00000007174 | 13.04024245 | 0           | 6.038398409  | 6.42E-05 | 0.000289184 | DNAH9      |
| ENSG00000278376 | 40.35540462 | 8.856735655 | 2.178919237  | 6.43E-05 | 0.000289365 | AP004609.3 |
| ENSG00000184545 | 75.08304766 | 2.975038428 | 4.673787659  | 6.43E-05 | 0.000289527 | DUSP8      |
| ENSG00000204403 | 23.5152829  | 1.365948763 | 4.056332267  | 6.44E-05 | 0.000289839 | CASP12     |
| ENSG00000110429 | 941.7255287 | 482.1787064 | 0.965650859  | 6.45E-05 | 0.000290436 | FBXO3      |
| ENSG00000144909 | 570.9041761 | 331.1246264 | 0.785451791  | 6.45E-05 | 0.000290436 | OSBPL11    |
| ENSG00000286904 | 14.02827769 | 0           | 6.143099656  | 6.46E-05 | 0.000290828 | AC093675.1 |
| ENSG00000140015 | 25.16613056 | 0           | 6.988092937  | 6.48E-05 | 0.00029139  | KCNH5      |
| ENSG00000286125 | 14.95717761 | 0           | 6.235611115  | 6.48E-05 | 0.000291476 | AC006115.2 |
| ENSG00000197044 | 258.2873288 | 101.0579904 | 1.351741248  | 6.49E-05 | 0.000291701 | ZNF441     |
| ENSG00000154719 | 238.3890064 | 557.030782  | -1.22420566  | 6.49E-05 | 0.000291701 | MRPL39     |
| ENSG00000215612 | 20.8814146  | 0           | 6.717063045  | 6.53E-05 | 0.000293676 | HMX1       |
| ENSG00000229847 | 47.68964477 | 0.693008929 | 6.07171329   | 6.55E-05 | 0.000294267 | EMX2OS     |
| ENSG00000126062 | 784.2837584 | 1374.280993 | -0.809305039 | 6.55E-05 | 0.000294417 | TMEM115    |
| novel.712       | 26.85433078 | 75.66797321 | -1.49213452  | 6.57E-05 | 0.00029542  | -          |
| ENSG00000213866 | 90.1826994  | 202.3163677 | -1.166164709 | 6.58E-05 | 0.000295516 | YBX1P10    |
| ENSG00000129103 | 1372.549803 | 2486.695478 | -0.857491836 | 6.58E-05 | 0.000295582 | SUMF2      |
| ENSG00000163072 | 32.38614578 | 3.271370153 | 3.315954572  | 6.63E-05 | 0.00029758  | NOSTRIN    |
| ENSG00000127990 | 2409.147986 | 1118.94883  | 1.106215309  | 6.63E-05 | 0.00029758  | SGCE       |
| ENSG00000251127 | 0           | 14.85743479 | -6.470383653 | 6.65E-05 | 0.000298598 | AC091173.1 |
| ENSG00000228522 | 39.6524476  | 1.783850939 | 4.471407218  | 6.65E-05 | 0.000298598 | AL845321.1 |
| ENSG00000258311 | 47.79445376 | 10.38439306 | 2.202158339  | 6.66E-05 | 0.000298974 | AC009779.3 |
| ENSG00000036530 | 40.8660263  | 6.195657903 | 2.731850901  | 6.67E-05 | 0.000299108 | CYP46A1    |
| ENSG00000254639 | 0.925067711 | 22.38031593 | -4.616186576 | 6.67E-05 | 0.000299279 | AC116021.1 |
| ENSG00000225792 | 13.03390294 | 0           | 6.037765798  | 6.72E-05 | 0.000301329 | AC004540.2 |
| ENSG00000171130 | 861.0930277 | 190.608617  | 2.174343547  | 6.73E-05 | 0.000301628 | ATP6V0E2   |
| ENSG00000165495 | 354.8436556 | 62.18290853 | 2.509662866  | 6.75E-05 | 0.00030286  | PKNOX2     |
| novel.1001      | 1217.570154 | 0           | 12.58338386  | 6.78E-05 | 0.000303942 | -          |
| ENSG00000279302 | 16.18906285 | 0           | 6.351604095  | 6.79E-05 | 0.000304295 | AC013643.3 |
| ENSG00000287287 | 1.81990531  | 25.44727071 | -3.805218914 | 6.80E-05 | 0.000304632 | AL133476.1 |
| ENSG00000271653 | 12.71927879 | 0           | 6.002645096  | 6.80E-05 | 0.000304655 | AC097359.3 |
| ENSG00000142149 | 21.55210493 | 0.743759607 | 4.898361897  | 6.82E-05 | 0.000305744 | HUNK       |
| novel.248       | 16.13633798 | 0           | 6.345455894  | 6.85E-05 | 0.000306704 | -          |
| ENSG00000279955 | 17.19214186 | 0           | 6.4377256    | 6.85E-05 | 0.000306965 | AC129778.1 |
| ENSG00000100442 | 660.2838953 | 1360.488437 | -1.04320117  | 6.87E-05 | 0.000307668 | FKBP3      |
| ENSG00000220804 | 42.2127772  | 8.836666559 | 2.247346368  | 6.90E-05 | 0.000308706 | LINC01881  |
| ENSG00000152749 | 383.8766236 | 719.5723661 | -0.906164515 | 6.91E-05 | 0.000309433 | GPR180     |
| ENSG00000133624 | 561.6703109 | 252.4481079 | 1.153974826  | 6.92E-05 | 0.000309798 | ZNF767P    |
| ENSG00000198944 | 17.77020402 | 0           | 6.484212825  | 6.93E-05 | 0.000310169 | SOWAHA     |
| ENSG00000119899 | 405.5372109 | 860.9075312 | -1.085882771 | 6.94E-05 | 0.000310367 | SLC17A5    |
| ENSG00000037042 | 812.9639787 | 412.5030848 | 0.979499788  | 6.96E-05 | 0.000311281 | TUBG2      |
| novel.17        | 42.30701502 | 6.084699937 | 2.797299347  | 6.96E-05 | 0.000311459 | -          |
| novel.625       | 3.342808826 | 40.39418171 | -3.593638447 | 6.96E-05 | 0.000311459 | -          |
| ENSG00000188033 | 100.2752758 | 40.68401055 | 1.298821462  | 6.98E-05 | 0.000311944 | ZNF490     |
| ENSG00000121064 | 1701.983887 | 714.3531718 | 1.252478129  | 6.98E-05 | 0.000312034 | SCPEP1     |
| ENSG00000065357 | 418.395076  | 974.1622985 | -1.218965606 | 7.00E-05 | 0.00031279  | DGKA       |

|                 |             |             |              |          |             |            |
|-----------------|-------------|-------------|--------------|----------|-------------|------------|
| ENSG00000137207 | 1448.437452 | 2722.909202 | -0.910576593 | 7.01E-05 | 0.000313051 | YIPF3      |
| ENSG00000168917 | 115.3216766 | 371.7350044 | -1.689305158 | 7.02E-05 | 0.000313446 | SLC35G2    |
| ENSG00000185304 | 6.425185486 | 63.72634986 | -3.313055252 | 7.02E-05 | 0.000313802 | RGPD2      |
| ENSG00000158246 | 38.1581211  | 134.7609041 | -1.822408646 | 7.05E-05 | 0.000314744 | TENT5B     |
| ENSG00000228476 | 12.98228952 | 0           | 6.03261447   | 7.07E-05 | 0.000315527 | CSTP1      |
| ENSG00000134369 | 896.1950238 | 2866.397588 | -1.677481791 | 7.08E-05 | 0.00031597  | NAV1       |
| ENSG00000188647 | 2125.489936 | 886.5688489 | 1.261530548  | 7.08E-05 | 0.00031597  | PTAR1      |
| ENSG00000215105 | 112.0852861 | 36.05383649 | 1.634981033  | 7.09E-05 | 0.000316339 | TTC3P1     |
| ENSG00000231826 | 13.05410386 | 0           | 6.039789003  | 7.11E-05 | 0.000317086 | LINC01819  |
| ENSG00000183431 | 1069.352592 | 2075.659925 | -0.956983256 | 7.11E-05 | 0.000317209 | SF3A3      |
| ENSG00000118156 | 29.35907256 | 3.515795324 | 3.045414228  | 7.12E-05 | 0.000317444 | ZNF541     |
| ENSG00000265817 | 171.4095009 | 72.46767962 | 1.240424428  | 7.12E-05 | 0.00031759  | FSBP       |
| ENSG00000287725 | 137.4317575 | 10.59672399 | 3.708635953  | 7.15E-05 | 0.000318666 | AP003071.5 |
| ENSG00000102699 | 1105.874225 | 1809.836456 | -0.710708227 | 7.15E-05 | 0.000318907 | PARP4      |
| ENSG00000225151 | 8.27148869  | 53.30554302 | -2.692672823 | 7.16E-05 | 0.000319209 | GOLGA2P7   |
| ENSG00000140474 | 1284.692735 | 494.494335  | 1.377068269  | 7.16E-05 | 0.000319231 | ULK3       |
| ENSG00000266200 | 20.57431235 | 0           | 6.695683108  | 7.17E-05 | 0.000319324 | PNLIPRP2   |
| ENSG00000182993 | 170.3511341 | 37.18828432 | 2.195427087  | 7.18E-05 | 0.000319814 | C12orf60   |
| ENSG00000228626 | 0           | 11.87306815 | -6.150297528 | 7.18E-05 | 0.000319861 | AC245100.3 |
| ENSG00000168876 | 294.3882476 | 130.0953438 | 1.176820557  | 7.19E-05 | 0.000320403 | ANKRD49    |
| ENSG00000007944 | 457.2816102 | 116.8863662 | 1.9664074    | 7.20E-05 | 0.000320453 | MYLIP      |
| ENSG00000100629 | 94.77934623 | 210.259206  | -1.150747766 | 7.23E-05 | 0.000321875 | CEP128     |
| ENSG00000018189 | 1551.83215  | 771.1343248 | 1.009066864  | 7.23E-05 | 0.000321877 | RUFY3      |
| ENSG00000185651 | 1664.744288 | 2748.438396 | -0.723283491 | 7.27E-05 | 0.000323376 | UBE2L3     |
| ENSG00000253955 | 25.75038969 | 1.130980201 | 4.558969182  | 7.27E-05 | 0.000323417 | AC008663.2 |
| ENSG00000169660 | 641.602899  | 270.3481904 | 1.24788603   | 7.29E-05 | 0.000324216 | HEXD       |
| ENSG00000121851 | 515.7042651 | 257.3311834 | 1.002253858  | 7.30E-05 | 0.000324628 | POLR3GL    |
| ENSG00000137747 | 13.08684127 | 0           | 6.043056974  | 7.30E-05 | 0.000324628 | TMPRSS13   |
| ENSG00000250990 | 20.26950393 | 0.693008929 | 4.827615995  | 7.31E-05 | 0.000324953 | AC098851.1 |
| ENSG00000260871 | 17.89836163 | 0.336469917 | 5.53336428   | 7.33E-05 | 0.00032579  | AC093510.2 |
| ENSG00000100109 | 294.772436  | 563.7272682 | -0.935367792 | 7.34E-05 | 0.000326132 | TFIP11     |
| ENSG00000179603 | 34.72440813 | 2.567748738 | 3.7724375    | 7.36E-05 | 0.000327178 | GRM8       |
| ENSG00000147180 | 226.7209877 | 58.26388625 | 1.960921536  | 7.37E-05 | 0.000327391 | ZNF711     |
| ENSG00000225905 | 22.57384649 | 1.753169357 | 3.665061997  | 7.39E-05 | 0.000328376 | AL391244.1 |
| ENSG00000007129 | 18.64853037 | 0           | 6.554051686  | 7.39E-05 | 0.000328424 | CEACAM21   |
| ENSG00000143545 | 581.2991252 | 1241.493223 | -1.094446534 | 7.40E-05 | 0.000328786 | RAB13      |
| ENSG00000006327 | 2393.475157 | 6283.114758 | -1.392336458 | 7.42E-05 | 0.000329452 | TNFRSF12A  |
| ENSG00000240376 | 385.5465173 | 702.8227378 | -0.866652658 | 7.42E-05 | 0.000329463 | AC010343.1 |
| ENSG00000272686 | 104.1155569 | 39.96977664 | 1.378492959  | 7.46E-05 | 0.00033101  | AC006333.2 |
| ENSG00000183092 | 113.391307  | 17.65339242 | 2.673995758  | 7.46E-05 | 0.000331128 | BEGAIN     |
| ENSG00000151778 | 195.4978032 | 86.65217458 | 1.174713927  | 7.46E-05 | 0.000331135 | SERP2      |
| ENSG00000265763 | 100.2389478 | 10.59813665 | 3.236571007  | 7.46E-05 | 0.000331135 | ZNF488     |
| ENSG00000109787 | 1045.578415 | 591.0689151 | 0.822475386  | 7.48E-05 | 0.000331803 | KLF3       |
| ENSG00000242193 | 288.5057808 | 103.7828714 | 1.472755131  | 7.50E-05 | 0.000332575 | CRYZL2P    |
| novel.300       | 25.83781728 | 0           | 7.024535348  | 7.55E-05 | 0.000335014 | -          |
| ENSG00000137261 | 23.86869924 | 0.356539013 | 5.950223118  | 7.57E-05 | 0.000335488 | KIAA0319   |
| ENSG00000160014 | 4373.437916 | 8056.81502  | -0.881475246 | 7.57E-05 | 0.000335585 | CALM3      |
| ENSG00000106483 | 7334.442203 | 51.35352773 | 7.157413132  | 7.57E-05 | 0.00033571  | SFRP4      |
| ENSG00000149480 | 1445.332099 | 2445.023737 | -0.758479989 | 7.58E-05 | 0.000336075 | MTA2       |
| ENSG00000198754 | 56.67875112 | 7.194455167 | 2.979459767  | 7.59E-05 | 0.000336144 | OXCT2      |
| ENSG00000285847 | 20.92278536 | 1.029478846 | 4.295391841  | 7.59E-05 | 0.000336248 | AL713852.1 |

|                 |             |             |              |          |             |            |
|-----------------|-------------|-------------|--------------|----------|-------------|------------|
| ENSG00000182327 | 51.9859283  | 8.752794155 | 2.57771894   | 7.61E-05 | 0.000337198 | GLTPD2     |
| ENSG00000126522 | 231.3510836 | 524.1500251 | -1.179644959 | 7.63E-05 | 0.000337899 | ASL        |
| ENSG00000134278 | 832.5364667 | 375.0716592 | 1.150354313  | 7.63E-05 | 0.000337948 | SPIRE1     |
| ENSG00000134686 | 3399.222768 | 7538.168659 | -1.148960359 | 7.67E-05 | 0.000339424 | PHC2       |
| ENSG00000103241 | 36.97978711 | 387.9018204 | -3.390614975 | 7.69E-05 | 0.000340428 | FOXF1      |
| ENSG00000251034 | 82.51216672 | 18.25063219 | 2.176194847  | 7.69E-05 | 0.000340565 | AC087854.1 |
| ENSG00000157350 | 632.5555408 | 1433.872964 | -1.18053061  | 7.70E-05 | 0.000340915 | ST3GAL2    |
| ENSG00000287356 | 62.4243282  | 18.43587755 | 1.764096409  | 7.71E-05 | 0.000341148 | AL590822.3 |
| ENSG00000073331 | 658.4861322 | 249.3696887 | 1.400508227  | 7.71E-05 | 0.000341201 | ALPK1      |
| ENSG00000160753 | 737.7468326 | 1236.799703 | -0.745506927 | 7.71E-05 | 0.000341201 | RUSC1      |
| ENSG00000177981 | 556.2593291 | 288.8553669 | 0.944460245  | 7.73E-05 | 0.000341998 | ASB8       |
| ENSG00000147155 | 134.3422859 | 286.1549217 | -1.09072254  | 7.74E-05 | 0.000342183 | EBP        |
| ENSG00000129474 | 541.9833265 | 1165.359503 | -1.104298743 | 7.74E-05 | 0.000342253 | AJUBA      |
| ENSG00000090238 | 1619.353626 | 592.357435  | 1.451383572  | 7.75E-05 | 0.000342688 | YPEL3      |
| ENSG00000273186 | 5.700089716 | 39.31220119 | -2.782770711 | 7.76E-05 | 0.000343107 | AL359091.5 |
| ENSG00000221829 | 240.6438716 | 615.1876443 | -1.354391922 | 7.78E-05 | 0.000343952 | FANCG      |
| ENSG00000143390 | 1198.351779 | 746.3416415 | 0.682984076  | 7.80E-05 | 0.000344393 | RFX5       |
| ENSG00000270681 | 21.99370431 | 1.060160428 | 4.359357876  | 7.81E-05 | 0.000345046 | AC095055.1 |
| ENSG00000115266 | 609.2600655 | 143.0671223 | 2.090860319  | 7.85E-05 | 0.000346618 | APC2       |
| ENSG00000165197 | 18.75168628 | 0.387220594 | 5.601047049  | 7.86E-05 | 0.000346869 | VEGFD      |
| ENSG00000175426 | 11.47074012 | 708.694502  | -5.948986773 | 7.87E-05 | 0.000347311 | PCSK1      |
| ENSG00000197958 | 10427.68364 | 16700.17534 | -0.679442906 | 7.87E-05 | 0.000347473 | RPL12      |
| ENSG00000171551 | 24.24797184 | 1.069617038 | 4.494891509  | 7.87E-05 | 0.00034751  | ECEL1      |
| ENSG00000213398 | 692.1300473 | 295.066646  | 1.229311207  | 7.89E-05 | 0.000348098 | LCAT       |
| ENSG00000286962 | 17.78524781 | 0           | 6.485397833  | 7.90E-05 | 0.000348332 | AC027128.1 |
| ENSG00000115128 | 888.8379496 | 1820.387242 | -1.034317109 | 7.90E-05 | 0.000348476 | SF3B6      |
| ENSG00000203650 | 12.4436603  | 0           | 5.9707059    | 7.91E-05 | 0.00034873  | LINC01285  |
| ENSG00000174482 | 12.4436603  | 0           | 5.9707059    | 7.91E-05 | 0.00034873  | LINGO2     |
| ENSG00000167112 | 436.1711491 | 783.9564326 | -0.846255822 | 7.93E-05 | 0.000349752 | TRUB2      |
| ENSG00000238078 | 26.73717128 | 1.161661783 | 4.598978377  | 7.94E-05 | 0.000350106 | LINC01352  |
| ENSG00000163479 | 1851.013077 | 3716.366094 | -1.005603511 | 7.97E-05 | 0.000351393 | SSR2       |
| ENSG00000162430 | 2134.526529 | 3636.766087 | -0.768679743 | 7.97E-05 | 0.000351393 | SELENON    |
| ENSG00000125378 | 224.5971389 | 18.41722112 | 3.603615906  | 7.98E-05 | 0.000351803 | BMP4       |
| ENSG00000235023 | 18.13873542 | 0.336469917 | 5.553181735  | 7.99E-05 | 0.000352109 | AP001626.1 |
| ENSG00000185420 | 170.30291   | 317.150793  | -0.896634089 | 8.00E-05 | 0.000352125 | SMYD3      |
| ENSG00000174839 | 803.4223539 | 391.8806429 | 1.036533047  | 8.01E-05 | 0.000352667 | DENND6A    |
| ENSG00000164941 | 402.7111502 | 725.8877491 | -0.849937168 | 8.01E-05 | 0.000352667 | INTS8      |
| ENSG00000230707 | 23.96483145 | 0.774441189 | 5.036658354  | 8.04E-05 | 0.000353942 | AL589987.1 |
| ENSG00000005156 | 281.2672021 | 546.5022145 | -0.958603811 | 8.04E-05 | 0.000353942 | LIG3       |
| ENSG00000147650 | 405.6229301 | 906.3356147 | -1.159576313 | 8.05E-05 | 0.000354088 | LRP12      |
| ENSG00000142867 | 259.6031654 | 531.8833787 | -1.034870133 | 8.06E-05 | 0.000354738 | BCL10      |
| ENSG00000124787 | 57.01525677 | 152.936397  | -1.425473637 | 8.07E-05 | 0.000354923 | RPP40      |
| ENSG00000173581 | 668.2645948 | 378.959919  | 0.818532105  | 8.10E-05 | 0.000356287 | CCDC106    |
| ENSG00000102054 | 1710.940674 | 2828.966935 | -0.725537479 | 8.10E-05 | 0.000356302 | RBBP7      |
| ENSG00000053372 | 633.9382365 | 1574.809405 | -1.312883084 | 8.11E-05 | 0.000356497 | MRTO4      |
| ENSG00000135018 | 1734.273805 | 3132.317392 | -0.852976128 | 8.11E-05 | 0.000356649 | UBQLN1     |
| ENSG00000146856 | 114.3747983 | 20.48910305 | 2.472856646  | 8.13E-05 | 0.00035742  | AGBL3      |
| ENSG00000135315 | 312.1633678 | 125.6423711 | 1.31151412   | 8.14E-05 | 0.000357763 | CEP162     |
| ENSG00000137070 | 434.7084215 | 222.5684475 | 0.966572928  | 8.15E-05 | 0.000358084 | IL11RA     |
| ENSG00000281162 | 0.601596751 | 28.67246651 | -5.565506079 | 8.15E-05 | 0.000358084 | LINC01127  |
| ENSG00000103510 | 932.9072326 | 526.5685911 | 0.825519126  | 8.16E-05 | 0.000358633 | KAT8       |

|                 |             |             |              |          |             |            |
|-----------------|-------------|-------------|--------------|----------|-------------|------------|
| ENSG00000134970 | 1366.987173 | 2317.462528 | -0.761545589 | 8.17E-05 | 0.000358929 | TMED7      |
| ENSG00000272288 | 58.06479241 | 17.92477476 | 1.695145833  | 8.20E-05 | 0.000360271 | AL451165.2 |
| ENSG00000251192 | 109.1415948 | 42.02745007 | 1.377765395  | 8.23E-05 | 0.000361102 | ZNF674     |
| ENSG00000130222 | 53.0291957  | 7.836585025 | 2.777304447  | 8.23E-05 | 0.000361112 | GADD45G    |
| ENSG00000197540 | 69.42431275 | 3.465044647 | 4.308124398  | 8.24E-05 | 0.000361414 | GZMM       |
| ENSG00000228408 | 15.61038778 | 0           | 6.297141476  | 8.25E-05 | 0.00036189  | AL031056.1 |
| ENSG00000171017 | 0.293240848 | 16.38637647 | -5.651106541 | 8.25E-05 | 0.00036189  | LRRRC8E    |
| ENSG00000245146 | 69.74205745 | 23.82769695 | 1.544407343  | 8.26E-05 | 0.000362074 | MALINC1    |
| ENSG00000156599 | 1422.193438 | 2645.111616 | -0.895289739 | 8.26E-05 | 0.000362074 | ZDHHC5     |
| ENSG00000227392 | 23.28264482 | 0.336469917 | 5.913242617  | 8.28E-05 | 0.000363115 | HPN-AS1    |
| ENSG00000100258 | 1807.299712 | 3612.777319 | -0.999275787 | 8.29E-05 | 0.000363546 | LMF2       |
| ENSG00000170043 | 874.2201992 | 1643.669532 | -0.910755189 | 8.33E-05 | 0.000365355 | TRAPPC1    |
| ENSG00000187244 | 662.9400011 | 314.5866402 | 1.075337282  | 8.35E-05 | 0.000365992 | BCAM       |
| ENSG00000127951 | 2857.116311 | 38.46732541 | 6.21373624   | 8.37E-05 | 0.000366571 | FGL2       |
| ENSG00000089692 | 53.39077467 | 10.04907902 | 2.408901532  | 8.37E-05 | 0.000366571 | LAG3       |
| ENSG00000135324 | 46.14550049 | 0.356539013 | 6.899695986  | 8.39E-05 | 0.000367574 | MRAP2      |
| ENSG00000237190 | 331.7813696 | 776.6099138 | -1.227435166 | 8.40E-05 | 0.00036787  | CDKN2AIPNL |
| ENSG00000287527 | 13.79395868 | 0           | 6.120861367  | 8.41E-05 | 0.000368206 | AC005753.3 |
| novel.306       | 24.2206763  | 0           | 6.931375534  | 8.43E-05 | 0.000369032 | -          |
| ENSG00000125755 | 1347.37299  | 2386.40332  | -0.824544414 | 8.44E-05 | 0.000369496 | SYMPK      |
| ENSG00000112367 | 393.8022502 | 218.5279017 | 0.84904365   | 8.45E-05 | 0.000369914 | FIG4       |
| ENSG00000162772 | 1096.636756 | 200.1176502 | 2.454768901  | 8.46E-05 | 0.000370398 | ATF3       |
| ENSG00000082153 | 2698.786463 | 6579.008716 | -1.2856123   | 8.48E-05 | 0.000370909 | BZW1       |
| ENSG00000128951 | 929.0239127 | 2013.430307 | -1.11605833  | 8.49E-05 | 0.000371268 | DUT        |
| ENSG00000165644 | 356.5039076 | 154.0833367 | 1.210268844  | 8.49E-05 | 0.000371297 | COMTD1     |
| novel.351       | 20.77754704 | 0           | 6.711794165  | 8.50E-05 | 0.000371591 | -          |
| ENSG00000230457 | 17.85301646 | 62.27225634 | -1.804838786 | 8.50E-05 | 0.000371612 | PA2G4P4    |
| ENSG00000272541 | 21.87529115 | 0.336469917 | 5.824187182  | 8.53E-05 | 0.000372736 | AL021368.3 |
| ENSG00000010165 | 500.5195349 | 972.6200384 | -0.958747268 | 8.55E-05 | 0.000373608 | EEF1AKNMT  |
| ENSG00000177042 | 597.8284268 | 347.161352  | 0.784257949  | 8.56E-05 | 0.000373948 | TMEM80     |
| ENSG00000119844 | 679.1806499 | 337.9470026 | 1.007079601  | 8.57E-05 | 0.000374293 | AFTPH      |
| ENSG00000125863 | 465.8219954 | 230.2525706 | 1.015335171  | 8.57E-05 | 0.000374304 | MKKS       |
| novel.1081      | 58.67398233 | 5.800264968 | 3.315816783  | 8.57E-05 | 0.0003744   | -          |
| ENSG00000140259 | 431.4136348 | 966.6245922 | -1.164031609 | 8.59E-05 | 0.000375324 | MFAP1      |
| ENSG00000169967 | 1311.795954 | 778.6411521 | 0.752512514  | 8.61E-05 | 0.000375994 | MAP3K2     |
| ENSG00000286271 | 23.0926308  | 1.722487775 | 3.704989669  | 8.63E-05 | 0.000376908 | AC008945.2 |
| ENSG00000135905 | 1135.099241 | 457.917837  | 1.309102742  | 8.64E-05 | 0.000377109 | DOCK10     |
| ENSG00000276728 | 56.31509178 | 15.36879438 | 1.872303174  | 8.67E-05 | 0.000378526 | AC142472.1 |
| ENSG00000100316 | 25587.30968 | 42913.77445 | -0.746013711 | 8.68E-05 | 0.000378637 | RPL3       |
| ENSG00000145016 | 350.7875205 | 130.0047929 | 1.430902529  | 8.68E-05 | 0.000378637 | RUBCN      |
| ENSG00000111816 | 47.72983315 | 5.533330555 | 3.122303982  | 8.69E-05 | 0.000378868 | FRK        |
| ENSG00000234520 | 0           | 14.1030627  | -6.395192165 | 8.69E-05 | 0.000379194 | AC018464.1 |
| ENSG00000132716 | 1469.243197 | 714.3468789 | 1.040573543  | 8.72E-05 | 0.000380314 | DCAF8      |
| ENSG00000255491 | 34.02968501 | 5.502648973 | 2.64321135   | 8.74E-05 | 0.000381193 | AC100858.3 |
| ENSG00000129116 | 7453.928958 | 2672.320861 | 1.47982351   | 8.75E-05 | 0.000381218 | PALLD      |
| ENSG00000181396 | 453.3149675 | 1018.222066 | -1.167504668 | 8.75E-05 | 0.000381268 | OGFOD3     |
| ENSG00000109618 | 326.1658879 | 171.6931233 | 0.924667402  | 8.77E-05 | 0.0003822   | SEPSECS    |
| ENSG00000175556 | 47.57220053 | 5.349241065 | 3.148313737  | 8.78E-05 | 0.000382409 | LONRF3     |
| ENSG00000099840 | 280.7117769 | 75.44446904 | 1.898610515  | 8.78E-05 | 0.00038243  | IZUMO4     |
| ENSG00000070756 | 9758.704586 | 16653.65244 | -0.771084735 | 8.80E-05 | 0.000383319 | PABPC1     |
| ENSG00000225828 | 204.8859555 | 66.83960739 | 1.617664948  | 8.81E-05 | 0.000383848 | FAM229A    |

|                 |             |             |              |          |             |            |
|-----------------|-------------|-------------|--------------|----------|-------------|------------|
| ENSG00000101290 | 1312.998407 | 680.0160309 | 0.949700712  | 8.83E-05 | 0.000384424 | CDS2       |
| ENSG00000157873 | 152.3595158 | 26.60533647 | 2.522836636  | 8.87E-05 | 0.000385974 | TNFRSF14   |
| ENSG00000122691 | 131.5250553 | 1020.070957 | -2.955602458 | 8.90E-05 | 0.000387218 | TWIST1     |
| ENSG00000173638 | 209.1887485 | 667.1175504 | -1.673397776 | 8.93E-05 | 0.000388575 | SLC19A1    |
| ENSG00000230510 | 40.2397835  | 7.245205845 | 2.478189464  | 8.95E-05 | 0.000389271 | PPP5D1     |
| ENSG00000104331 | 1738.78113  | 3339.820985 | -0.941656642 | 8.95E-05 | 0.000389496 | IMPAD1     |
| ENSG00000152990 | 387.4904202 | 870.2427619 | -1.167018265 | 8.96E-05 | 0.00038986  | ADGRA3     |
| ENSG00000077274 | 131.0070546 | 0           | 9.367145775  | 8.98E-05 | 0.00039038  | CAPN6      |
| ENSG00000115368 | 642.0614376 | 1149.009356 | -0.839730925 | 9.00E-05 | 0.000391146 | WDR75      |
| ENSG00000132141 | 56.55693268 | 17.52925343 | 1.688404849  | 9.08E-05 | 0.000394769 | CCT6B      |
| novel.1014      | 6.684364003 | 52.31337704 | -2.967035299 | 9.10E-05 | 0.00039553  | -          |
| ENSG00000176438 | 1209.645672 | 604.7807763 | 1.000381362  | 9.10E-05 | 0.000395684 | SYNE3      |
| ENSG00000102468 | 19.99144941 | 0.356539013 | 5.693205877  | 9.14E-05 | 0.000397255 | HTR2A      |
| ENSG00000284652 | 18.94281141 | 0.387220594 | 5.616447867  | 9.15E-05 | 0.000397618 | BX323043.1 |
| ENSG00000260947 | 24.71750749 | 0.713078025 | 5.106397091  | 9.16E-05 | 0.00039778  | AL356489.2 |
| ENSG00000108557 | 563.1275807 | 1212.872731 | -1.106683093 | 9.18E-05 | 0.00039855  | RAI1       |
| ENSG00000206432 | 27.20692075 | 0.743759607 | 5.2306882    | 9.18E-05 | 0.000398815 | TMEM200C   |
| ENSG00000166257 | 33.17016339 | 5.676254372 | 2.537540084  | 9.21E-05 | 0.000399725 | SCN3B      |
| ENSG00000261210 | 12.09121287 | 0           | 5.929869721  | 9.25E-05 | 0.000401523 | CLEC19A    |
| ENSG00000249577 | 12.09121287 | 0           | 5.929869721  | 9.25E-05 | 0.000401523 | AC010424.1 |
| ENSG00000063046 | 4310.657848 | 9000.838696 | -1.062145198 | 9.35E-05 | 0.000405653 | EIF4B      |
| ENSG00000286747 | 19.07766454 | 1.080229524 | 4.14615005   | 9.38E-05 | 0.000407012 | AL627095.2 |
| ENSG00000143549 | 5564.708879 | 10502.47808 | -0.916389098 | 9.40E-05 | 0.000407733 | TPM3       |
| ENSG00000127920 | 1129.808421 | 4049.168464 | -1.841588881 | 9.42E-05 | 0.000408419 | GNG11      |
| ENSG00000107242 | 23.15559832 | 0.774441189 | 4.986607743  | 9.44E-05 | 0.000409249 | PIP5K1B    |
| ENSG00000205683 | 18.2520627  | 59.70895553 | -1.71160708  | 9.44E-05 | 0.000409263 | DPF3       |
| ENSG00000187951 | 12.68020186 | 45.97047578 | -1.854492221 | 9.44E-05 | 0.000409263 | AC091057.1 |
| ENSG00000129473 | 2501.424145 | 1214.743164 | 1.042276151  | 9.47E-05 | 0.000410373 | BCL2L2     |
| ENSG00000150551 | 114.1871494 | 11.74101361 | 3.272292234  | 9.47E-05 | 0.000410516 | LYPD1      |
| ENSG00000163631 | 24.33837744 | 0.713078025 | 5.085737848  | 9.48E-05 | 0.000410933 | ALB        |
| ENSG00000106701 | 279.0886528 | 109.9095889 | 1.344674452  | 9.50E-05 | 0.000411425 | FSD1L      |
| ENSG00000246922 | 233.5220839 | 66.17141945 | 1.819972948  | 9.54E-05 | 0.000413044 | UBAP1L     |
| ENSG00000165637 | 1716.237114 | 3254.485127 | -0.923234992 | 9.54E-05 | 0.000413202 | VDAC2      |
| ENSG00000267577 | 1.218308559 | 32.61780397 | -4.744316518 | 9.56E-05 | 0.000414081 | AC010327.4 |
| ENSG00000227582 | 54.68692451 | 2.099095884 | 4.688607508  | 9.57E-05 | 0.000414348 | ADGRF5P1   |
| ENSG00000152253 | 0           | 22.44831038 | -7.066783778 | 9.58E-05 | 0.000414875 | SPC25      |
| ENSG00000116731 | 962.1623507 | 564.8485218 | 0.768501027  | 9.60E-05 | 0.000415466 | PRDM2      |
| ENSG00000124641 | 216.9199552 | 439.3642421 | -1.018920635 | 9.61E-05 | 0.000416022 | MED20      |
| ENSG00000132669 | 897.6848665 | 1551.135415 | -0.789196574 | 9.67E-05 | 0.000418578 | RIN2       |
| ENSG00000143816 | 105.4491577 | 8.509653252 | 3.627649232  | 9.68E-05 | 0.000418826 | WNT9A      |
| ENSG00000127952 | 280.6419561 | 685.6808212 | -1.288734843 | 9.71E-05 | 0.000420038 | STYXL1     |
| ENSG00000277449 | 104.7189489 | 16.55424967 | 2.650970485  | 9.75E-05 | 0.000421836 | CEBPB-AS1  |
| ENSG00000260398 | 47.49619832 | 5.574624622 | 3.109748818  | 9.83E-05 | 0.000424926 | AC068700.1 |
| ENSG00000214192 | 23.24349663 | 70.71181333 | -1.601828946 | 9.83E-05 | 0.000424926 | UBE2V1P2   |
| ENSG00000205763 | 208.8832563 | 88.01097848 | 1.247456807  | 9.83E-05 | 0.000425027 | RP9P       |
| ENSG00000164430 | 329.5795425 | 145.365077  | 1.179467006  | 9.85E-05 | 0.000425587 | CGAS       |
| ENSG00000152465 | 499.1297045 | 834.3675048 | -0.741221114 | 9.89E-05 | 0.000427388 | NMT2       |
| ENSG00000285748 | 20.79581013 | 0.336469917 | 5.749118136  | 9.90E-05 | 0.000427516 | AC090337.2 |
| ENSG00000171385 | 27.9556933  | 2.466247382 | 3.487204032  | 9.90E-05 | 0.000427516 | KCND3      |
| ENSG00000168259 | 1062.076732 | 1760.677657 | -0.729256353 | 9.91E-05 | 0.000427789 | DNAJC7     |
| novel.42        | 13.77884362 | 0           | 6.119358083  | 9.92E-05 | 0.000428532 | -          |

|                 |             |             |              |             |             |            |
|-----------------|-------------|-------------|--------------|-------------|-------------|------------|
| ENSG00000259820 | 168.5318261 | 52.3147897  | 1.691815955  | 9.94E-05    | 0.00042903  | AC083843.3 |
| ENSG00000161277 | 401.487115  | 183.7117654 | 1.129328308  | 9.96E-05    | 0.000429797 | THAP8      |
| ENSG00000079739 | 731.2169383 | 1906.289746 | -1.382259129 | 9.97E-05    | 0.000430412 | PGM1       |
| ENSG00000168491 | 5.102253911 | 31.38699187 | -2.61672166  | 1.00E-04    | 0.00043146  | CCDC110    |
| ENSG00000126953 | 82.54310849 | 213.6441498 | -1.373199654 | 0.000100091 | 0.000431828 | TIMM8A     |
| ENSG00000071462 | 938.4598614 | 1724.753448 | -0.878045248 | 0.00010044  | 0.000433263 | BUD23      |
| ENSG00000103591 | 416.2733956 | 875.9032104 | -1.073663743 | 0.000100558 | 0.000433699 | AAGAB      |
| ENSG00000117560 | 27.94720249 | 0.336469917 | 6.17578918   | 0.000100607 | 0.000433839 | FASLG      |
| ENSG00000166716 | 1176.000044 | 707.4502493 | 0.733411051  | 0.00010064  | 0.000433909 | ZNF592     |
| ENSG00000275963 | 23.42333892 | 0.774441189 | 5.004062156  | 0.000100848 | 0.000434667 | AC008115.4 |
| ENSG00000142224 | 0.308355904 | 37.72017972 | -6.85501481  | 0.000100849 | 0.000434667 | IL19       |
| ENSG00000100065 | 720.5289211 | 313.1754159 | 1.201821976  | 0.000100915 | 0.000434877 | CARD10     |
| ENSG00000137817 | 1376.360843 | 563.8109181 | 1.28783219   | 0.000101045 | 0.000435366 | PARP6      |
| ENSG00000082898 | 2015.301645 | 3633.557003 | -0.850487656 | 0.00010115  | 0.000435746 | XPO1       |
| ENSG00000285852 | 17.95882186 | 0.356539013 | 5.537775798  | 0.000101687 | 0.000437985 | AL353147.1 |
| ENSG00000228395 | 72.33448407 | 12.16007166 | 2.560946124  | 0.00010175  | 0.000438183 | AL356481.1 |
| ENSG00000233038 | 19.5421856  | 0.356539013 | 5.659448319  | 0.000102065 | 0.00043947  | AC011899.2 |
| ENSG00000144278 | 12.14791215 | 0           | 5.935919463  | 0.000102258 | 0.000440228 | GALNT13    |
| ENSG00000065675 | 32.6605819  | 3.862877727 | 3.063614462  | 0.000102305 | 0.000440357 | PRKCQ      |
| ENSG00000136826 | 914.0504079 | 109.6284117 | 3.05866278   | 0.000103021 | 0.000443363 | KLF4       |
| ENSG00000124203 | 29.86030544 | 0           | 7.23341639   | 0.000103131 | 0.000443765 | ZNF831     |
| ENSG00000174600 | 517.7679015 | 35.80740354 | 3.851367899  | 0.000103539 | 0.000445391 | CMKLR1     |
| ENSG00000108405 | 55.91543228 | 4.821536799 | 3.516093473  | 0.000103544 | 0.000445391 | P2RX1      |
| novel.1118      | 14.68406642 | 0           | 6.208879024  | 0.000103566 | 0.000445415 | -          |
| ENSG00000139687 | 1947.963623 | 1009.594823 | 0.948076208  | 0.000103678 | 0.000445822 | RB1        |
| ENSG00000227191 | 27.99387258 | 0           | 7.140269509  | 0.000103704 | 0.000445858 | TRGC2      |
| ENSG00000228797 | 7.90517986  | 40.08176209 | -2.343236884 | 0.000103752 | 0.000445949 | FAM207BP   |
| ENSG00000215568 | 17.84681949 | 0           | 6.491398653  | 0.000103769 | 0.000445949 | GAB4       |
| ENSG00000278867 | 60.39915162 | 7.417526974 | 3.039439086  | 0.000103776 | 0.000445949 | AC090616.6 |
| ENSG00000196263 | 398.5775295 | 157.5125155 | 1.3408062    | 0.000103815 | 0.000446043 | ZNF471     |
| ENSG00000158669 | 1150.862134 | 1833.74449  | -0.672088471 | 0.00010384  | 0.000446075 | GPAT4      |
| ENSG00000131116 | 1433.201283 | 725.2297204 | 0.982770012  | 0.000103936 | 0.000446416 | ZNF428     |
| ENSG00000110958 | 2777.168159 | 5842.507431 | -1.073012306 | 0.000104141 | 0.000447223 | PTGES3     |
| ENSG00000112276 | 700.8961999 | 287.8832572 | 1.284731428  | 0.000104329 | 0.000447956 | BVES       |
| ENSG00000101557 | 1155.035888 | 2037.71931  | -0.819135945 | 0.000104554 | 0.000448846 | USP14      |
| ENSG00000117009 | 49.75228897 | 6.1460631   | 3.020500371  | 0.000104614 | 0.000449031 | KMO        |
| ENSG00000135333 | 287.4555429 | 18.30151126 | 3.970928082  | 0.00010481  | 0.000449796 | EPHA7      |
| ENSG00000145949 | 61.17607426 | 21.41220025 | 1.511275943  | 0.000105295 | 0.000451805 | MYLK4      |
| ENSG00000015676 | 1396.336845 | 2181.686739 | -0.64371822  | 0.00010547  | 0.000452414 | NUDCD3     |
| ENSG00000117133 | 372.9352227 | 792.1859364 | -1.08726888  | 0.000105472 | 0.000452414 | RPF1       |
| ENSG00000142657 | 1198.675218 | 2737.777835 | -1.191656917 | 0.00010568  | 0.000453194 | PGD        |
| ENSG00000110583 | 384.3334365 | 716.5413115 | -0.898611168 | 0.000105689 | 0.000453194 | NAA40      |
| ENSG00000215845 | 243.709155  | 30.48524803 | 2.994996883  | 0.000105795 | 0.000453575 | TSTD1      |
| ENSG00000229739 | 58.77531476 | 8.397539412 | 2.796654832  | 0.000106083 | 0.000454734 | AL096803.2 |
| ENSG00000238129 | 19.00932641 | 0           | 6.583561088  | 0.000106314 | 0.00045565  | AL121904.1 |
| ENSG00000114767 | 299.3628146 | 712.3560693 | -1.251051889 | 0.000106337 | 0.000455671 | RRP9       |
| ENSG00000145220 | 285.7096491 | 709.1475562 | -1.312089706 | 0.00010646  | 0.000456126 | LYAR       |
| ENSG00000198721 | 552.9934639 | 1034.457779 | -0.903223758 | 0.000106696 | 0.000457062 | ECI2       |
| ENSG00000259583 | 126.4537594 | 54.35727432 | 1.221792336  | 0.000107179 | 0.000459052 | AC015712.2 |
| ENSG00000047936 | 0           | 12.35130601 | -6.210242022 | 0.000107367 | 0.000459781 | ROS1       |
| ENSG00000259660 | 58.12586555 | 9.955878399 | 2.542093451  | 0.000107386 | 0.000459789 | DNM1P47    |

|                 |             |             |              |             |             |            |
|-----------------|-------------|-------------|--------------|-------------|-------------|------------|
| ENSG00000025434 | 1152.084254 | 262.2295418 | 2.134659775  | 0.000107972 | 0.000462221 | NR1H3      |
| ENSG00000162545 | 219.4613807 | 790.5237806 | -1.848485874 | 0.00010801  | 0.000462306 | CAMK2N1    |
| ENSG00000155093 | 486.8435893 | 154.2227117 | 1.657933765  | 0.00010808  | 0.000462531 | PTPRN2     |
| ENSG00000184903 | 341.3911184 | 146.9680833 | 1.215843299  | 0.000108117 | 0.000462613 | IMMP2L     |
| ENSG00000089009 | 12148.73493 | 23345.87881 | -0.942366695 | 0.000108247 | 0.000463095 | AC004086.1 |
| ENSG00000223482 | 502.5743447 | 271.0179662 | 0.890215925  | 0.000108371 | 0.000463548 | NUTM2A-AS1 |
| ENSG00000226757 | 42.94991126 | 2.038888596 | 4.362055624  | 0.000108403 | 0.000463606 | AC079341.1 |
| ENSG00000059691 | 1339.933476 | 516.2668802 | 1.375877434  | 0.000108533 | 0.000464055 | GATB       |
| novel.580       | 59.28317224 | 18.39458348 | 1.691219774  | 0.000108546 | 0.000464055 | -          |
| ENSG00000156804 | 210.2102607 | 981.9807157 | -2.223866223 | 0.000108566 | 0.000464055 | FBXO32     |
| ENSG00000120322 | 19.9141932  | 0           | 6.650508659  | 0.000108579 | 0.000464055 | PCDHB8     |
| ENSG00000189108 | 20.34980907 | 0.356539013 | 5.720130443  | 0.000108665 | 0.000464346 | IL1RAPL2   |
| ENSG00000172382 | 60.7852341  | 12.168244   | 2.320463878  | 0.000109088 | 0.000466079 | PRSS27     |
| ENSG00000168769 | 801.1418476 | 307.0083377 | 1.384166223  | 0.000109108 | 0.000466087 | TET2       |
| ENSG00000119397 | 531.4607332 | 291.0464604 | 0.868083842  | 0.000109172 | 0.000466285 | CNTRL      |
| ENSG00000270578 | 33.95987978 | 1.742556871 | 4.262788716  | 0.000109861 | 0.000469147 | AP000787.2 |
| ENSG00000272555 | 12.91548979 | 0           | 6.025786015  | 0.000109941 | 0.000469414 | AC009974.1 |
| ENSG00000064199 | 38.8752677  | 106.5807084 | -1.457571515 | 0.000110588 | 0.000472098 | SPA17      |
| ENSG00000288066 | 339.8192235 | 167.0045401 | 1.025413463  | 0.000110638 | 0.000472235 | AC097448.1 |
| ENSG00000204272 | 463.3008846 | 853.0960371 | -0.880611999 | 0.00011085  | 0.000473061 | NBDY       |
| ENSG00000273442 | 15.80506039 | 0           | 6.317357716  | 0.000110969 | 0.000473492 | AC006946.3 |
| ENSG00000188282 | 18.08851785 | 0           | 6.509903092  | 0.000111031 | 0.000473678 | RUFY4      |
| novel.376       | 0           | 11.8506873  | -6.148090121 | 0.000111057 | 0.00047371  | -          |
| ENSG00000048162 | 213.409955  | 558.8489233 | -1.389020439 | 0.000111368 | 0.000474959 | NOP16      |
| ENSG00000165272 | 56.36644829 | 3.404837359 | 4.022893838  | 0.00011161  | 0.000475915 | AQP3       |
| ENSG00000234742 | 32.56097348 | 96.30110877 | -1.565874437 | 0.00011178  | 0.000476561 | AC144530.1 |
| ENSG00000120049 | 203.6333124 | 56.39372277 | 1.854281851  | 0.000112255 | 0.000478505 | KCNIP2     |
| ENSG00000237493 | 112.6737334 | 298.1315333 | -1.402907936 | 0.000112476 | 0.00047937  | AC034102.2 |
| ENSG00000105053 | 348.3782546 | 607.2283673 | -0.801557959 | 0.000112675 | 0.000480138 | VRK3       |
| ENSG00000198755 | 7535.296957 | 15164.72186 | -1.009000849 | 0.000112704 | 0.000480186 | RPL10A     |
| ENSG00000108591 | 403.7668112 | 666.0029708 | -0.72213414  | 0.000112873 | 0.000480825 | DRG2       |
| ENSG00000132016 | 75.33326501 | 17.32625072 | 2.115595596  | 0.000112969 | 0.000481155 | C19orf57   |
| ENSG00000169188 | 313.2708838 | 532.9548882 | -0.766696528 | 0.00011308  | 0.00048155  | APEX2      |
| ENSG00000146648 | 551.6136708 | 3624.935109 | -2.716301193 | 0.00011324  | 0.000482152 | EGFR       |
| ENSG00000163599 | 26.08947391 | 0.356539013 | 6.07650097   | 0.000113743 | 0.000484212 | CTLA4      |
| ENSG00000237380 | 0.879722543 | 21.38267454 | -4.573009261 | 0.000114619 | 0.000487862 | HOXD-AS2   |
| ENSG00000249436 | 11.78536427 | 0           | 5.892949665  | 0.000114794 | 0.000488528 | AC008780.1 |
| ENSG00000262814 | 192.0704579 | 470.798145  | -1.293897724 | 0.000114813 | 0.000488528 | MRPL12     |
| ENSG00000032219 | 553.1091404 | 256.3577079 | 1.110189292  | 0.00011499  | 0.000489201 | ARID4A     |
| ENSG00000174840 | 465.5820207 | 761.7858791 | -0.710471222 | 0.000115125 | 0.000489698 | PDE12      |
| ENSG00000168481 | 70.11702746 | 1.854670712 | 5.257620704  | 0.000115458 | 0.000491032 | LGI3       |
| ENSG00000279406 | 22.09191654 | 1.00940975  | 4.384935973  | 0.0001156   | 0.000491557 | AL359183.1 |
| ENSG00000076706 | 12655.9255  | 3236.226517 | 1.967502981  | 0.000115969 | 0.000493046 | AP002956.1 |
| ENSG00000278727 | 48.27820683 | 7.278327571 | 2.711909448  | 0.000116789 | 0.00049645  | AC000403.1 |
| novel.899       | 92.81387372 | 6.899279318 | 3.753074438  | 0.000116978 | 0.000497169 | -          |
| ENSG00000263956 | 270.6621097 | 129.9096661 | 1.060328261  | 0.000117327 | 0.000498572 | NBPF11     |
| ENSG00000004961 | 292.955564  | 616.4474685 | -1.073536669 | 0.000117854 | 0.000500732 | HCCS       |
| novel.44        | 25.46907243 | 0.356539013 | 6.041764671  | 0.000117908 | 0.000500876 | -          |
| ENSG00000147123 | 1047.148443 | 1917.961823 | -0.873061667 | 0.000118074 | 0.000501502 | NDUFB11    |
| ENSG00000109832 | 26.51248237 | 0           | 7.062115356  | 0.000118101 | 0.000501535 | DDX25      |
| ENSG00000210164 | 26.25148038 | 77.04723139 | -1.554108169 | 0.000118279 | 0.000502208 | MT-TG      |



|                 |             |             |              |             |             |             |
|-----------------|-------------|-------------|--------------|-------------|-------------|-------------|
| ENSG00000131127 | 394.1943875 | 199.4632852 | 0.984055847  | 0.000118513 | 0.000503117 | ZNF141      |
| ENSG00000124171 | 74.29759077 | 9.027772514 | 3.057148305  | 0.000118596 | 0.000503391 | PARD6B      |
| ENSG00000271259 | 29.36756337 | 2.822786395 | 3.367054303  | 0.00011873  | 0.000503874 | AC010201.1  |
| ENSG00000265982 | 45.56192554 | 11.98402612 | 1.934484812  | 0.000118926 | 0.000504626 | AC103810.3  |
| ENSG00000135829 | 2193.894011 | 4010.771065 | -0.870459044 | 0.000119536 | 0.000507131 | DHX9        |
| ENSG00000121413 | 789.6354616 | 334.4566834 | 1.238846352  | 0.000119622 | 0.000507413 | ZSCAN18     |
| ENSG00000230498 | 16.95789413 | 0           | 6.418921488  | 0.000120142 | 0.000509535 | AL035409.1  |
| ENSG00000198585 | 1791.441158 | 900.6879779 | 0.991740967  | 0.000120558 | 0.000511217 | NUDT16      |
| ENSG00000162065 | 181.7921267 | 391.8918162 | -1.108394021 | 0.000120889 | 0.000512536 | TBC1D24     |
| ENSG00000114861 | 696.4675861 | 368.076016  | 0.920525661  | 0.000121141 | 0.000513519 | FOXP1       |
| ENSG00000172336 | 433.3923707 | 828.0958691 | -0.934119289 | 0.000121425 | 0.000514639 | POP7        |
| ENSG00000255833 | 19.02884316 | 0           | 6.583046351  | 0.000121724 | 0.000515824 | TIFAB       |
| ENSG00000248719 | 0           | 11.16829086 | -6.061948099 | 0.000121793 | 0.000515958 | AC021127.1  |
| ENSG00000158258 | 858.9009461 | 119.9480898 | 2.841300069  | 0.000121795 | 0.000515958 | CLSTN2      |
| ENSG00000104814 | 32.41010765 | 1.345879667 | 4.536597853  | 0.000121879 | 0.000516226 | MAP4K1      |
| ENSG00000115866 | 889.3663069 | 1840.219339 | -1.049009138 | 0.000122086 | 0.000517022 | DARS        |
| ENSG00000197217 | 1123.783387 | 2106.587353 | -0.906353236 | 0.000122691 | 0.000519499 | ENTPD4      |
| ENSG00000198909 | 1340.04198  | 776.7357438 | 0.786595025  | 0.000122714 | 0.00051951  | MAP3K3      |
| ENSG00000272254 | 16.11850216 | 0           | 6.345532893  | 0.000123594 | 0.000523134 | AC022893.3  |
| ENSG00000013588 | 35.98827532 | 2552.05824  | -6.14830231  | 0.00012361  | 0.000523134 | GPRC5A      |
| ENSG00000259678 | 11.79546473 | 0           | 5.894053831  | 0.000123839 | 0.000524018 | AC06613.2   |
| ENSG00000250155 | 59.92782033 | 8.038560254 | 2.904909496  | 0.000123877 | 0.000524094 | AC008957.1  |
| ENSG00000248528 | 26.23790371 | 1.161661783 | 4.568201257  | 0.000124335 | 0.000525942 | LINC02058   |
| ENSG00000260101 | 24.42523556 | 2.934900236 | 3.076554913  | 0.000124355 | 0.000525942 | AC008074.2  |
| ENSG00000168589 | 12.05972911 | 0           | 5.926460255  | 0.000124448 | 0.00052625  | DYNLRB2     |
| ENSG00000186198 | 23.31788953 | 0.713078025 | 5.023127235  | 0.000125034 | 0.000528642 | SLC51B      |
| ENSG00000248671 | 56.01085283 | 17.02046238 | 1.7119073    | 0.000125209 | 0.000529298 | AP003498.1  |
| ENSG00000273654 | 6.685617652 | 32.33735021 | -2.278845836 | 0.000125611 | 0.000530908 | AC020904.2  |
| ENSG00000135698 | 290.8503395 | 701.8206707 | -1.270357543 | 0.000125676 | 0.000531098 | MPHOSPH6    |
| ENSG00000259826 | 43.5192688  | 11.71966024 | 1.886333626  | 0.000125981 | 0.000532302 | AC072061.1  |
| ENSG00000116406 | 872.5445919 | 1679.162259 | -0.944490593 | 0.00012605  | 0.000532505 | EDEM3       |
| ENSG00000081014 | 317.1650722 | 608.4744959 | -0.940336917 | 0.00012636  | 0.000533729 | AP4E1       |
| ENSG00000176658 | 299.5897383 | 1518.454058 | -2.341567222 | 0.00012649  | 0.000534191 | MYO1D       |
| ENSG00000163214 | 373.4761179 | 622.073567  | -0.736118936 | 0.000126654 | 0.000534798 | DHX57       |
| ENSG00000180139 | 35.2051557  | 4.901813183 | 2.827730048  | 0.000126994 | 0.000536145 | ACTA2-AS1   |
| ENSG00000141552 | 1011.57705  | 1800.852572 | -0.832169105 | 0.000127126 | 0.000536614 | ANAPC11     |
| ENSG00000182108 | 116.5083589 | 43.74891036 | 1.410020573  | 0.000127204 | 0.000536856 | DEXI        |
| ENSG00000067182 | 2493.339893 | 4681.985786 | -0.909104431 | 0.000127818 | 0.000539361 | TNFRSF1A    |
| ENSG00000124762 | 5415.885285 | 13220.0639  | -1.287461661 | 0.00012794  | 0.000539788 | CDKN1A      |
| ENSG00000167635 | 1100.190505 | 1926.526776 | -0.808123303 | 0.000128374 | 0.000541531 | ZNF146      |
| ENSG00000126970 | 371.8874118 | 204.6535146 | 0.861652978  | 0.000129013 | 0.000544138 | ZC4H2       |
| ENSG00000224081 | 40.05360169 | 5.361009426 | 2.898189941  | 0.000129316 | 0.000545328 | SLC44A3-AS1 |
| ENSG00000113812 | 342.9174706 | 599.6279064 | -0.806387617 | 0.000129598 | 0.000546426 | ACTR8       |
| ENSG00000132003 | 62.84447301 | 262.7390307 | -2.062484128 | 0.000129687 | 0.000546716 | ZSWIM4      |
| ENSG00000169857 | 203.7299581 | 442.245228  | -1.118975788 | 0.000130187 | 0.000548734 | AVEN        |
| ENSG00000167653 | 3.590704505 | 25.6610143  | -2.827229828 | 0.000130387 | 0.000549485 | PSCA        |
| ENSG00000273796 | 42.10238414 | 3.168712922 | 3.719494776  | 0.000130448 | 0.000549656 | BX322562.1  |
| ENSG00000229980 | 40.54409372 | 10.42568713 | 1.960710519  | 0.000130549 | 0.000549991 | TOB1-AS1    |
| ENSG00000224578 | 432.5854592 | 863.9524816 | -0.998405506 | 0.00013069  | 0.000550496 | HNRNPA1P48  |
| ENSG00000052749 | 284.7849812 | 798.6423895 | -1.487963439 | 0.00013112  | 0.000552219 | RRP12       |
| ENSG00000146197 | 274.2700201 | 2700.054941 | -3.299482805 | 0.000131163 | 0.000552308 | SCUBE3      |

|                 |             |             |              |             |             |            |
|-----------------|-------------|-------------|--------------|-------------|-------------|------------|
| ENSG00000256427 | 21.43641254 | 0.387220594 | 5.792922167  | 0.000131452 | 0.000553437 | AC010175.1 |
| ENSG00000237649 | 0           | 16.63337018 | -6.63998455  | 0.00013175  | 0.000554599 | KIFC1      |
| ENSG00000175854 | 292.232363  | 647.8919707 | -1.148838014 | 0.000132012 | 0.000555615 | SWI5       |
| ENSG00000236333 | 25.75708522 | 117.0756271 | -2.184187041 | 0.000132226 | 0.000556425 | TRHDE-AS1  |
| ENSG00000131263 | 918.6280815 | 1450.162055 | -0.658633971 | 0.000132625 | 0.000558013 | RLIM       |
| ENSG00000276148 | 31.7499885  | 3.302051734 | 3.282247669  | 0.000132994 | 0.000559474 | AC084824.5 |
| ENSG00000169093 | 626.032514  | 1723.855643 | -1.461148005 | 0.000133092 | 0.000559798 | ASMTL      |
| ENSG00000253276 | 411.6343534 | 1556.042791 | -1.918260988 | 0.000133173 | 0.000560048 | CCDC71L    |
| ENSG00000281398 | 107.0263408 | 462.8589364 | -2.11215752  | 0.000133493 | 0.000561301 | SNHG4      |
| novel.512       | 132.365033  | 37.2628285  | 1.824034357  | 0.000133904 | 0.00056294  | -          |
| ENSG00000100532 | 350.3906808 | 152.2857096 | 1.200564686  | 0.00013466  | 0.000565979 | CGRRF1     |
| ENSG00000062716 | 2545.666489 | 5185.813101 | -1.026497759 | 0.000134671 | 0.000565979 | VMP1       |
| novel.267       | 15.49670449 | 0           | 6.288972439  | 0.000134856 | 0.000566664 | -          |
| ENSG00000168356 | 27.18797347 | 2.120320855 | 3.668863134  | 0.000134883 | 0.000566687 | SCN11A     |
| ENSG00000112062 | 765.9241503 | 1428.204826 | -0.899112977 | 0.000135409 | 0.000568804 | MAPK14     |
| ENSG00000099849 | 26.13962021 | 83.57409374 | -1.676295589 | 0.000135575 | 0.00056941  | RASSF7     |
| ENSG00000234636 | 42.31600402 | 9.711453227 | 2.124934284  | 0.000135995 | 0.000571081 | MED14OS    |
| ENSG00000076554 | 277.3788683 | 27.99777568 | 3.304547593  | 0.000136526 | 0.000573218 | TPD52      |
| ENSG00000143858 | 28.17189176 | 1.813376645 | 3.966211897  | 0.000136627 | 0.000573549 | SYT2       |
| ENSG00000137815 | 781.1204644 | 1265.650338 | -0.696207879 | 0.000136656 | 0.00057358  | RTF1       |
| ENSG00000137074 | 397.0619897 | 739.8971576 | -0.898328373 | 0.000136876 | 0.000574412 | APTX       |
| ENSG00000138152 | 25.40804273 | 0.743759607 | 5.132690028  | 0.000137344 | 0.000576282 | BTBD16     |
| ENSG00000106399 | 223.3972523 | 562.6243326 | -1.333180506 | 0.00013769  | 0.000577638 | RPA3       |
| ENSG00000175324 | 318.2728451 | 630.9714339 | -0.987867261 | 0.000138095 | 0.000579247 | LSM1       |
| ENSG00000100372 | 301.2422828 | 594.3652006 | -0.980768975 | 0.000138232 | 0.000579725 | SLC25A17   |
| ENSG00000238098 | 25.77080408 | 2.038888596 | 3.613749619  | 0.000138474 | 0.00058065  | ABCA17P    |
| ENSG00000172215 | 54.34377866 | 4.230029225 | 3.674592468  | 0.000138876 | 0.000582239 | CXCR6      |
| ENSG00000231233 | 2.430348874 | 22.42161    | -3.210031262 | 0.000139071 | 0.000582962 | CFAP58-DT  |
| ENSG00000163349 | 1405.424744 | 724.27776   | 0.956124933  | 0.00013926  | 0.000583597 | HIPK1      |
| ENSG00000062038 | 20.97439878 | 1.365948763 | 3.890409937  | 0.000139267 | 0.000583597 | CDH3       |
| ENSG00000205143 | 43.32466746 | 7.449492825 | 2.532503918  | 0.000139505 | 0.00058441  | ARID3C     |
| ENSG00000166685 | 431.2347057 | 771.4103647 | -0.838706515 | 0.000139506 | 0.00058441  | COG1       |
| ENSG00000104205 | 631.6827981 | 278.4664788 | 1.180840159  | 0.000139791 | 0.000585509 | SGK3       |
| ENSG00000169567 | 1624.977683 | 3449.893953 | -1.086229009 | 0.000139931 | 0.000586002 | HINT1      |
| ENSG00000286369 | 27.32616027 | 3.169868797 | 3.094502243  | 0.000139998 | 0.000586188 | AP002813.1 |
| ENSG00000137574 | 263.4811985 | 496.8693767 | -0.915212679 | 0.0001402   | 0.000586938 | TGS1       |
| ENSG00000086696 | 0.307102255 | 17.96362868 | -5.783791474 | 0.000140262 | 0.000587102 | HSD17B2    |
| ENSG00000101463 | 279.9070456 | 24.97429832 | 3.481520518  | 0.000140294 | 0.000587141 | SYNDIG1    |
| ENSG00000277978 | 35.58128026 | 5.952517001 | 2.564316223  | 0.000140453 | 0.000587649 | AC010542.5 |
| ENSG00000138821 | 105.0328458 | 487.5228104 | -2.215189437 | 0.00014046  | 0.000587649 | SLC39A8    |
| ENSG00000153294 | 0.308355904 | 21.32691518 | -6.030335644 | 0.00014054  | 0.000587889 | ADGRF4     |
| ENSG00000160087 | 881.3844291 | 1497.062212 | -0.764075654 | 0.000140657 | 0.000588283 | UBE2J2     |
| ENSG00000198720 | 531.5811992 | 236.1618201 | 1.17099846   | 0.000141157 | 0.000590279 | ANKRD13B   |
| ENSG00000075131 | 71.15378497 | 212.4119722 | -1.578306958 | 0.00014138  | 0.000591117 | TIPIN      |
| ENSG00000180061 | 25.96110284 | 1.456837632 | 4.166925585  | 0.000141531 | 0.000591653 | TMEM150B   |
| ENSG00000144182 | 141.0220626 | 41.60612745 | 1.757096394  | 0.000141577 | 0.00059175  | LIPT1      |
| ENSG00000188986 | 1365.91379  | 2343.806046 | -0.778971795 | 0.000141705 | 0.00059219  | NELFB      |
| ENSG00000167968 | 46.54870713 | 7.278327571 | 2.659477068  | 0.00014183  | 0.000592618 | DNASE1L2   |
| ENSG00000106683 | 707.8968252 | 1785.319998 | -1.334473756 | 0.000141999 | 0.000593227 | LIMK1      |
| ENSG00000197808 | 162.5150318 | 80.15201261 | 1.018445365  | 0.000142131 | 0.000593681 | ZNF461     |
| ENSG00000144730 | 333.5908723 | 47.56792548 | 2.810182778  | 0.000142291 | 0.000594257 | IL17RD     |

|                 |             |             |              |             |             |            |
|-----------------|-------------|-------------|--------------|-------------|-------------|------------|
| ENSG00000259354 | 1.803536605 | 54.39710854 | -4.90997673  | 0.000142563 | 0.000595295 | AC025580.2 |
| ENSG00000106554 | 626.2271717 | 1206.199015 | -0.945991336 | 0.000142699 | 0.000595769 | CHCHD3     |
| ENSG00000187498 | 8993.432558 | 24604.7973  | -1.452004765 | 0.000142843 | 0.000596275 | COL4A1     |
| ENSG00000008294 | 4672.457317 | 2538.206318 | 0.880434281  | 0.000143312 | 0.000598135 | SPAG9      |
| ENSG00000112679 | 898.3688756 | 277.2811175 | 1.69499906   | 0.000143386 | 0.000598349 | DUSP22     |
| novel.90        | 0           | 23.46602086 | -7.131416111 | 0.000143579 | 0.000598964 | -          |
| ENSG00000197860 | 274.3503419 | 526.8035937 | -0.941024964 | 0.00014358  | 0.000598964 | SGTB       |
| ENSG00000153094 | 175.4891146 | 34.86393327 | 2.328252126  | 0.000143824 | 0.000599887 | BCL2L11    |
| ENSG00000103335 | 2269.067539 | 4223.509696 | -0.896296065 | 0.000144328 | 0.000601856 | PIEZO1     |
| ENSG00000241935 | 30.4777727  | 5.471967392 | 2.490041546  | 0.000144343 | 0.000601856 | HOGA1      |
| ENSG00000040608 | 60.49954297 | 10.96644402 | 2.457126065  | 0.000144571 | 0.000602713 | RTN4R      |
| ENSG00000102780 | 239.9805328 | 507.8866995 | -1.081751776 | 0.000144755 | 0.00060338  | DGKH       |
| ENSG00000287263 | 261.5501447 | 88.01483129 | 1.569475106  | 0.00014481  | 0.000603516 | AC008875.3 |
| ENSG00000198901 | 3.297463658 | 24.18308009 | -2.869234776 | 0.000145082 | 0.000604506 | PRC1       |
| novel.678       | 55.51588784 | 13.30983669 | 2.062072096  | 0.000145094 | 0.000604506 | -          |
| ENSG00000124767 | 1827.375336 | 3247.332628 | -0.829564364 | 0.000145229 | 0.000604969 | GLO1       |
| ENSG00000160563 | 212.4640734 | 399.9474574 | -0.912758415 | 0.000145744 | 0.000607017 | MED27      |
| ENSG00000143799 | 1653.725943 | 3037.516089 | -0.877304249 | 0.000145784 | 0.000607085 | PARP1      |
| ENSG00000174579 | 643.3818904 | 310.2738473 | 1.052506705  | 0.000146075 | 0.000608199 | MSL2       |
| ENSG00000207359 | 11.50222388 | 0           | 5.857615499  | 0.000146328 | 0.000609158 | RNU6-925P  |
| ENSG00000269113 | 234.3411595 | 19.58016717 | 3.57577751   | 0.000146489 | 0.000609731 | TRABD2B    |
| ENSG00000226025 | 14.06234001 | 0           | 6.146545136  | 0.00014696  | 0.00061159  | AC005515.1 |
| novel.1116      | 37.85295668 | 5.767143241 | 2.717632122  | 0.000147077 | 0.000611981 | -          |
| ENSG00000228427 | 14.0748765  | 0           | 6.1477407    | 0.00014713  | 0.000612105 | AL590764.1 |
| ENSG00000134884 | 5234.937007 | 2633.087178 | 0.991486375  | 0.000147693 | 0.000614345 | ARGLU1     |
| ENSG00000035141 | 439.9445596 | 863.8304788 | -0.97377272  | 0.000147746 | 0.000614467 | FAM136A    |
| ENSG00000116954 | 554.0761921 | 275.5395412 | 1.006948989  | 0.000147798 | 0.000614587 | RRAGC      |
| ENSG00000070019 | 11.54756905 | 0           | 5.862711969  | 0.00014826  | 0.000616335 | GUCY2C     |
| ENSG00000063438 | 1.84261353  | 37.73348914 | -4.363310474 | 0.00014827  | 0.000616335 | AHRR       |
| ENSG00000159640 | 72.644022   | 15.45852737 | 2.232942814  | 0.000148289 | 0.000616335 | ACE        |
| ENSG00000154096 | 1635.028823 | 360.21726   | 2.182549904  | 0.000148512 | 0.000617161 | THY1       |
| ENSG00000181234 | 210.1087839 | 0           | 10.04863702  | 0.000148598 | 0.000617421 | TMEM132C   |
| ENSG00000141682 | 151.8029231 | 725.1779978 | -2.255854524 | 0.000148814 | 0.000618217 | PMAIP1     |
| ENSG00000167193 | 85.64930483 | 180.4470262 | -1.075069669 | 0.000148921 | 0.000618562 | CRK        |
| ENSG00000149761 | 317.8644535 | 669.2002638 | -1.073716186 | 0.000149826 | 0.000622224 | NUDT22     |
| ENSG00000182134 | 159.0531691 | 65.75608581 | 1.272009394  | 0.000149857 | 0.000622252 | TDRKH      |
| ENSG00000116667 | 655.8675445 | 250.8365781 | 1.386599286  | 0.000150014 | 0.000622806 | C1orf21    |
| novel.682       | 18.12738131 | 166.8438243 | -3.202767259 | 0.000150434 | 0.000624449 | -          |
| ENSG00000224116 | 0           | 12.0643025  | -6.171406171 | 0.000150466 | 0.000624455 | INHBA-AS1  |
| ENSG00000261103 | 56.32121783 | 4.167381792 | 3.781145058  | 0.000150484 | 0.000624455 | AC009063.3 |
| ENSG00000132436 | 180.2077665 | 404.8220907 | -1.167326399 | 0.000150645 | 0.000625024 | FIGNL1     |
| ENSG00000249825 | 17.98751358 | 0.356539013 | 5.542120541  | 0.000151381 | 0.000627979 | AC012636.1 |
| ENSG00000283638 | 14.04060071 | 0           | 6.146603382  | 0.000151512 | 0.000628421 | AC002407.1 |
| ENSG00000221914 | 764.2294134 | 1343.424707 | -0.813831007 | 0.000151641 | 0.000628857 | PPP2R2A    |
| ENSG00000169100 | 6696.421934 | 14203.43838 | -1.084787402 | 0.000152045 | 0.000630433 | SLC25A6    |
| ENSG00000235706 | 121.6492624 | 37.58239298 | 1.699281412  | 0.000152239 | 0.000631134 | DICER1-AS1 |
| ENSG00000095794 | 571.7451342 | 306.5107671 | 0.898733269  | 0.000152392 | 0.00063167  | CREM       |
| ENSG00000241058 | 253.6147076 | 131.0681642 | 0.951270241  | 0.000152654 | 0.000632603 | NSUN6      |
| ENSG00000166145 | 206.9628286 | 36.6982781  | 2.495676846  | 0.000152666 | 0.000632603 | SPINT1     |
| ENSG00000126461 | 1744.098063 | 3102.181762 | -0.830716439 | 0.000152796 | 0.000633041 | SCAF1      |
| ENSG00000004478 | 1180.979208 | 2996.33724  | -1.343309407 | 0.000153147 | 0.000634395 | FKBP4      |

|                 |             |             |              |             |             |                 |
|-----------------|-------------|-------------|--------------|-------------|-------------|-----------------|
| ENSG00000158417 | 2330.353217 | 4015.392158 | -0.785016953 | 0.000153204 | 0.000634527 | EIF5B           |
| ENSG00000100300 | 2374.39425  | 4089.373251 | -0.784293499 | 0.000153309 | 0.00063486  | TSPO            |
| ENSG00000204851 | 101.6857775 | 17.81510106 | 2.505492855  | 0.000153966 | 0.000637482 | PNMA8B          |
| ENSG00000116212 | 371.7365731 | 924.8383221 | -1.315220296 | 0.000154369 | 0.000639046 | LRRC42          |
| ENSG00000115661 | 390.5524252 | 648.5666612 | -0.731585112 | 0.00015441  | 0.000639115 | STK16           |
| ENSG00000140563 | 577.1332931 | 79.52948513 | 2.85753247   | 0.000154624 | 0.000639899 | MCTP2           |
| ENSG00000178105 | 239.6049061 | 623.9439526 | -1.381336311 | 0.000154906 | 0.000640963 | DDX10           |
| ENSG00000225556 | 33.70621405 | 4.597180723 | 2.864559045  | 0.000154937 | 0.00064099  | C2CD4D          |
| ENSG00000167280 | 1421.854173 | 609.0900888 | 1.223453158  | 0.000155202 | 0.000641984 | ENGASE          |
| ENSG00000127419 | 810.0338352 | 350.0969073 | 1.20971907   | 0.000155426 | 0.000642807 | TMEM175         |
| ENSG00000158773 | 1095.418361 | 628.4664485 | 0.801976812  | 0.000156215 | 0.000645877 | USF1            |
| ENSG00000177302 | 25.11884757 | 66.16209123 | -1.397968245 | 0.000156218 | 0.000645877 | TOP3A           |
| ENSG00000277117 | 32.41017892 | 3.139187216 | 3.347423704  | 0.00015632  | 0.000646199 | FP565260.3      |
| ENSG00000069248 | 719.6878611 | 1155.738113 | -0.683406461 | 0.000157009 | 0.000648933 | NUP133          |
| ENSG00000230426 | 52.3197848  | 6.940701779 | 2.898351012  | 0.000157052 | 0.000648933 | ERVMER61-1      |
| novel.1060      | 40.59040781 | 6.676207511 | 2.592933148  | 0.000157057 | 0.000648933 | -               |
| ENSG00000198934 | 80.91217737 | 26.57837931 | 1.6063262    | 0.000157451 | 0.000650459 | MAGEE1          |
| ENSG00000158806 | 40.63123623 | 0.356539013 | 6.716049437  | 0.000157941 | 0.000652379 | NPM2            |
| ENSG00000181991 | 356.092238  | 624.980611  | -0.812005905 | 0.000158167 | 0.000653208 | MRPS11          |
| ENSG00000101203 | 350.1332536 | 1.161661783 | 8.261816754  | 0.000158323 | 0.00065375  | COL20A1         |
| ENSG00000259869 | 17.49834648 | 0           | 6.461987299  | 0.000158521 | 0.000654415 | AL022344.1      |
| ENSG00000153157 | 22.58165311 | 1.110911105 | 4.375908428  | 0.000158535 | 0.000654415 | SYCP2L          |
| ENSG00000166377 | 561.4335552 | 272.7165793 | 1.041471202  | 0.000158741 | 0.000655164 | ATP9B           |
| ENSG00000160961 | 582.6828608 | 264.8585125 | 1.137439378  | 0.00015878  | 0.000655218 | ZNF333          |
| ENSG00000248479 | 20.59143651 | 0.356539013 | 5.737243912  | 0.000159752 | 0.000659124 | AC104137.1      |
| ENSG00000114439 | 807.4247246 | 1617.467978 | -1.002336372 | 0.000159834 | 0.000659359 | BBX             |
| ENSG00000171815 | 13.69101659 | 0           | 6.108399562  | 0.000159933 | 0.000659664 | PCDHB1          |
| ENSG00000237773 | 23.23590346 | 1.733100261 | 3.714512356  | 0.000160704 | 0.000662736 | AC073332.1      |
| ENSG00000143067 | 179.8062839 | 553.5515847 | -1.62169611  | 0.000160921 | 0.000663529 | ZNF697          |
| ENSG00000150556 | 18.12258018 | 0           | 6.512579424  | 0.00016104  | 0.000663905 | LYPD6B          |
| ENSG00000261373 | 50.06140032 | 176.2613391 | -1.816351508 | 0.000161064 | 0.000663905 | VPS9D1-AS1      |
| ENSG00000067141 | 474.0800048 | 1501.325723 | -1.663130072 | 0.000161615 | 0.000666072 | NEO1            |
| ENSG00000267508 | 86.40706674 | 35.61804857 | 1.279489612  | 0.000161951 | 0.00066735  | ZNF285          |
| ENSG00000088179 | 265.337816  | 139.359322  | 0.928358908  | 0.000162023 | 0.00066754  | PTPN4           |
| ENSG00000142197 | 342.5834719 | 181.4090245 | 0.917592492  | 0.000162581 | 0.000669737 | DOP1B           |
| ENSG00000101311 | 18.45865889 | 188.0923425 | -3.351309087 | 0.000163219 | 0.000672256 | FERMT1          |
| ENSG00000221821 | 166.6744531 | 61.43529611 | 1.436028988  | 0.000163257 | 0.000672306 | C6orf226        |
| ENSG00000079277 | 1018.490525 | 399.1236782 | 1.351447158  | 0.000163961 | 0.000675097 | MKNK1           |
| ENSG00000165046 | 39.71340602 | 95.69068797 | -1.268770957 | 0.00016408  | 0.000675483 | LETM2           |
| ENSG00000178623 | 51.066089   | 9.082247606 | 2.478240203  | 0.000164571 | 0.000677397 | GPR35           |
| ENSG00000124019 | 32.44424125 | 2.486316478 | 3.697339287  | 0.000164941 | 0.00067881  | FAM124B         |
| ENSG00000232721 | 11.45938601 | 0           | 5.852771887  | 0.000165036 | 0.000679094 | AC239800.2      |
| ENSG00000259887 | 14.09353904 | 0           | 6.151629571  | 0.000165348 | 0.000680269 | AC068987.1      |
| ENSG00000015479 | 183.5442358 | 67.98834493 | 1.434503958  | 0.00016543  | 0.000680501 | MATR3           |
| ENSG00000254996 | 60.61076241 | 18.8845897  | 1.679451352  | 0.000165929 | 0.000682446 | ANKHD1-EIF4EBP3 |
| ENSG00000100614 | 1393.061093 | 781.675499  | 0.833863666  | 0.000166133 | 0.000683175 | PPM1A           |
| ENSG00000234290 | 70.25740899 | 17.72292792 | 1.982981993  | 0.000166289 | 0.000683709 | AC116366.1      |
| ENSG00000151276 | 1324.570187 | 360.7507086 | 1.876050313  | 0.000167135 | 0.000687078 | MAGI1           |
| ENSG00000164188 | 220.8975509 | 1.722487775 | 6.989147616  | 0.000167472 | 0.000688354 | RANBP3L         |
| ENSG00000174109 | 143.0147865 | 317.264799  | -1.150487478 | 0.000167707 | 0.000689213 | C16orf91        |
| ENSG00000273179 | 67.68288946 | 16.21405534 | 2.062932489  | 0.000167802 | 0.000689495 | AC092535.4      |

|                 |             |             |              |             |             |            |
|-----------------|-------------|-------------|--------------|-------------|-------------|------------|
| ENSG00000253159 | 49.4289602  | 301.318868  | -2.608993156 | 0.000168292 | 0.000691399 | PCDHGA12   |
| novel.340       | 21.00588254 | 1.487519214 | 3.853087035  | 0.000168606 | 0.000692577 | -          |
| ENSG00000241360 | 64.07721244 | 174.4053713 | -1.444061686 | 0.00016871  | 0.000692897 | PDXP       |
| ENSG00000111276 | 1645.13001  | 673.4819078 | 1.288264788  | 0.000168743 | 0.000692922 | CDKN1B     |
| ENSG00000233452 | 17.83664776 | 103.4840055 | -2.534595205 | 0.000169115 | 0.000694339 | STXBP5-AS1 |
| ENSG00000148334 | 713.1542044 | 1378.16192  | -0.950484671 | 0.000169353 | 0.000695102 | PTGES2     |
| ENSG00000100567 | 1195.380864 | 1944.942076 | -0.702283438 | 0.000169354 | 0.000695102 | PSMA3      |
| ENSG00000137225 | 11.53872224 | 0           | 5.861731999  | 0.000169429 | 0.000695297 | CAPN11     |
| ENSG00000265688 | 41.40494026 | 108.7207132 | -1.392236279 | 0.000169607 | 0.00069592  | MAFG-DT    |
| ENSG00000183298 | 45.08751748 | 105.6655268 | -1.229600518 | 0.000169913 | 0.000697063 | RPSAP19    |
| ENSG00000132872 | 13.14354055 | 0           | 6.048983266  | 0.000170261 | 0.000698384 | SYT4       |
| ENSG00000259768 | 33.23660713 | 104.2302993 | -1.650228055 | 0.000170293 | 0.000698404 | AC004943.2 |
| ENSG00000228707 | 0.894837599 | 17.8632832  | -4.301173206 | 0.000170476 | 0.000699045 | AL691426.1 |
| ENSG00000124602 | 45.76565843 | 6.673767367 | 2.794277809  | 0.000170669 | 0.000699724 | UNC5CL     |
| ENSG00000276259 | 24.13457328 | 2.782648203 | 3.090964174  | 0.00017122  | 0.000701872 | AC009118.3 |
| ENSG00000154639 | 69.04905835 | 10.8236486  | 2.66398592   | 0.000171541 | 0.000703077 | CXADR      |
| ENSG00000164742 | 156.8302265 | 14.07494966 | 3.474383498  | 0.000172202 | 0.000705676 | ADCY1      |
| ENSG00000168140 | 8.257627283 | 49.36572814 | -2.58260742  | 0.000172805 | 0.000708034 | VASN       |
| ENSG00000052850 | 51.43393586 | 0.693008929 | 6.184176971  | 0.000173038 | 0.000708878 | ALX4       |
| ENSG00000111729 | 12.49402006 | 0           | 5.976123832  | 0.000173116 | 0.000709086 | CLEC4A     |
| ENSG00000229334 | 6.080259955 | 31.20495734 | -2.359682457 | 0.000173221 | 0.000709391 | AC046143.1 |
| ENSG00000143318 | 26.27411733 | 1.426156051 | 4.196872236  | 0.000173245 | 0.000709391 | CASQ1      |
| ENSG00000178999 | 187.2485371 | 848.6404744 | -2.180536478 | 0.000173349 | 0.000709705 | AURKB      |
| ENSG00000119125 | 0.922560414 | 17.07005718 | -4.227772327 | 0.000173447 | 0.000709994 | GDA        |
| ENSG00000142207 | 734.9373388 | 1410.692186 | -0.940958315 | 0.000173495 | 0.000710076 | URB1       |
| ENSG00000020577 | 2363.839573 | 846.1519233 | 1.482429558  | 0.00017464  | 0.000714652 | SAMD4A     |
| novel.193       | 59.48754517 | 0.387220594 | 7.266220958  | 0.000175501 | 0.000718063 | -          |
| ENSG00000037280 | 95.56104217 | 11.75735829 | 3.028936933  | 0.000176135 | 0.000720543 | FLT4       |
| ENSG00000107957 | 9399.150444 | 4679.793634 | 1.006127854  | 0.000176642 | 0.000722501 | SH3PXD2A   |
| ENSG00000083454 | 7.990855601 | 64.83897759 | -3.026213239 | 0.000177015 | 0.000723915 | P2RX5      |
| ENSG00000139915 | 19.66192367 | 0           | 6.630321623  | 0.00017705  | 0.000723945 | MDGA2      |
| ENSG00000115561 | 1408.69299  | 884.3241925 | 0.671558849  | 0.000177233 | 0.000724576 | CHMP3      |
| ENSG00000281128 | 11.24297409 | 0           | 5.824152951  | 0.000177285 | 0.000724678 | PTENP1-AS  |
| ENSG00000100181 | 123.0182074 | 5.900610448 | 4.37308488   | 0.00017746  | 0.000725278 | TPTEP1     |
| ENSG00000159403 | 7182.39218  | 2415.255549 | 1.572280183  | 0.000177591 | 0.0007257   | C1R        |
| ENSG00000260027 | 38.38498949 | 308.3969245 | -3.007026447 | 0.000177642 | 0.000725757 | HOXB7      |
| ENSG00000135314 | 26.99287359 | 82.01040774 | -1.605546999 | 0.000177661 | 0.000725757 | KHDC1      |
| novel.691       | 0.293240848 | 47.55201316 | -7.19176998  | 0.000177728 | 0.000725915 | -          |
| ENSG00000112406 | 715.1703211 | 382.7518826 | 0.902161189  | 0.000177928 | 0.00072662  | HECA       |
| ENSG00000163661 | 687.5691419 | 9310.772695 | -3.759331899 | 0.000178804 | 0.000730079 | PTX3       |
| ENSG00000169139 | 925.8907062 | 1650.78148  | -0.83425191  | 0.000179211 | 0.000731527 | UBE2V2     |
| ENSG00000112210 | 117.5316666 | 505.7803432 | -2.106184908 | 0.000179214 | 0.000731527 | RAB23      |
| ENSG00000163946 | 1357.959733 | 835.5736243 | 0.700841841  | 0.000179382 | 0.000732095 | TASOR      |
| ENSG00000225313 | 72.63768284 | 194.0609346 | -1.416133402 | 0.000179575 | 0.000732753 | AL513327.1 |
| ENSG00000161281 | 525.9781213 | 107.8480283 | 2.284289509  | 0.000179599 | 0.000732753 | COX7A1     |
| ENSG00000144891 | 10.3997499  | 65.42218443 | -2.657933822 | 0.000180244 | 0.000735267 | AGTR1      |
| ENSG00000225083 | 17.89710798 | 0.723690511 | 4.637899351  | 0.000180297 | 0.000735369 | GRTP1-AS1  |
| ENSG00000120696 | 202.7161657 | 89.00759239 | 1.186150085  | 0.000180375 | 0.000735571 | KBTBD7     |
| ENSG00000014641 | 1523.085094 | 3039.560779 | -0.996955655 | 0.000180876 | 0.000737497 | MDH1       |
| ENSG00000170242 | 1919.684264 | 1162.287903 | 0.72380026   | 0.000181204 | 0.000738716 | USP47      |
| ENSG00000165995 | 74.3219083  | 17.68163385 | 2.065893736  | 0.000181232 | 0.000738716 | CACNB2     |

|                 |             |             |              |             |             |            |
|-----------------|-------------|-------------|--------------|-------------|-------------|------------|
| ENSG00000272823 | 23.55059888 | 2.200597239 | 3.43822212   | 0.000181688 | 0.000740459 | AL445423.1 |
| ENSG00000197054 | 38.49008287 | 9.313620147 | 2.045381615  | 0.000182408 | 0.000743278 | ZNF763     |
| ENSG00000135549 | 116.9779933 | 14.76551844 | 2.986230214  | 0.000182525 | 0.000743638 | PKIB       |
| ENSG00000146038 | 23.98399219 | 0           | 6.917174011  | 0.000182628 | 0.000743941 | DCDC2      |
| ENSG00000281376 | 6.996480853 | 36.97351325 | -2.40599732  | 0.000182875 | 0.000744832 | ABALON     |
| ENSG00000163625 | 1826.423164 | 927.8828697 | 0.977095437  | 0.000183249 | 0.000746235 | WDFY3      |
| ENSG00000279267 | 119.1453752 | 34.98267839 | 1.77454243   | 0.000183641 | 0.000747715 | AL078621.3 |
| ENSG00000237548 | 0.909952655 | 16.72413066 | -4.20378738  | 0.00018395  | 0.000748857 | TTL11-IT1  |
| ENSG00000125375 | 529.5206354 | 202.7086442 | 1.384443196  | 0.000184182 | 0.000749686 | DMAC2L     |
| ENSG00000177551 | 18.12634112 | 0           | 6.512894488  | 0.000184469 | 0.000750698 | NHLH2      |
| ENSG00000131507 | 3711.535291 | 2178.052095 | 0.768826051  | 0.000184489 | 0.000750698 | NDFIP1     |
| ENSG00000130723 | 1658.225789 | 3084.640078 | -0.89549644  | 0.000185356 | 0.00075411  | PRRC2B     |
| ENSG00000158055 | 29.09502164 | 1.00940975  | 4.791266593  | 0.000185422 | 0.000754258 | GRHL3      |
| ENSG00000134595 | 16.49240415 | 0           | 6.37814035   | 0.000186194 | 0.000757282 | SOX3       |
| ENSG00000169131 | 287.4335651 | 140.5784941 | 1.033148068  | 0.000186231 | 0.000757311 | ZNF354A    |
| ENSG00000142798 | 13323.79735 | 7034.203378 | 0.921555167  | 0.000186559 | 0.000758529 | HSPG2      |
| ENSG00000177462 | 12.62858845 | 0           | 5.993156479  | 0.000186759 | 0.000759222 | OR2T8      |
| ENSG00000227295 | 3.016830569 | 23.53953757 | -2.959545272 | 0.000186867 | 0.00075954  | ELL2P1     |
| ENSG00000151287 | 74.48602297 | 193.5747471 | -1.378483384 | 0.000188158 | 0.00076467  | TEX30      |
| ENSG00000278558 | 30.32712033 | 2.211209725 | 3.796066809  | 0.000188608 | 0.00076638  | TMEM191B   |
| ENSG00000215548 | 26.57975247 | 1.029478846 | 4.650051947  | 0.000189198 | 0.000768654 | FRG1JP     |
| ENSG00000164434 | 12.57815742 | 0           | 5.987847593  | 0.000189644 | 0.000770348 | FABP7      |
| ENSG00000204442 | 44.1226174  | 219.4410755 | -2.3158044   | 0.000189918 | 0.000771339 | FAM155A    |
| ENSG00000160888 | 3936.039625 | 777.5012079 | 2.339794945  | 0.000190041 | 0.00077172  | IER2       |
| ENSG00000184007 | 2694.848318 | 4361.742391 | -0.69473797  | 0.000190118 | 0.00077191  | PTP4A2     |
| ENSG00000065457 | 242.947644  | 501.4799609 | -1.046272456 | 0.000190754 | 0.000774373 | ADAT1      |
| ENSG00000102081 | 1028.155103 | 607.8007045 | 0.758222882  | 0.000191607 | 0.000777713 | FMR1       |
| ENSG00000069482 | 2.152223082 | 33.02462694 | -3.951410497 | 0.000191845 | 0.000778556 | GAL        |
| ENSG00000170412 | 141.5938554 | 25.23622405 | 2.483604294  | 0.000191936 | 0.000778805 | GPRC5C     |
| novel.389       | 0           | 329.5321133 | -10.94531833 | 0.000193028 | 0.000783115 | -          |
| ENSG00000132356 | 1050.227517 | 1819.298475 | -0.792574556 | 0.00019325  | 0.000783892 | PRKAA1     |
| novel.599       | 2.135854377 | 43.03159434 | -4.334572307 | 0.000193929 | 0.000786522 | -          |
| ENSG00000091947 | 452.6400896 | 847.6702097 | -0.905351842 | 0.000194734 | 0.000789666 | TMEM101    |
| ENSG00000134283 | 701.4706871 | 1174.559074 | -0.743826495 | 0.000195497 | 0.000792634 | PPHLN1     |
| ENSG00000173852 | 548.0236393 | 1178.093607 | -1.104391187 | 0.000195546 | 0.00079271  | DPY19L1    |
| ENSG00000272008 | 54.11605642 | 8.315978758 | 2.706339293  | 0.000195813 | 0.000793667 | AL139274.2 |
| ENSG00000117090 | 21.22501521 | 0           | 6.740731781  | 0.00019596  | 0.000794143 | SLAMF1     |
| ENSG00000121594 | 11.1560447  | 0           | 5.814089766  | 0.00019693  | 0.000797946 | CD80       |
| ENSG00000204065 | 19.0514801  | 0           | 6.58478602   | 0.000197021 | 0.000798193 | TCEAL5     |
| ENSG00000261324 | 88.45423988 | 23.78396274 | 1.896701147  | 0.000197216 | 0.000798819 | AC010168.2 |
| ENSG00000254645 | 14.0317539  | 0           | 6.145661566  | 0.000197237 | 0.000798819 | AC087379.1 |
| ENSG00000073584 | 238.9208967 | 122.0284949 | 0.967966206  | 0.000197905 | 0.000801397 | SMARCE1    |
| ENSG00000169189 | 769.3031453 | 1254.535252 | -0.705525469 | 0.000198206 | 0.000802491 | NSMCE1     |
| novel.1058      | 25.02077753 | 1.365948763 | 4.150409258  | 0.00019824  | 0.000802505 | -          |
| ENSG00000154545 | 48.71117321 | 186.1417614 | -1.933603215 | 0.000198611 | 0.000803862 | MAGED4     |
| ENSG00000088340 | 82.06808718 | 747.6927016 | -3.187895153 | 0.000198637 | 0.000803862 | FER1L4     |
| ENSG00000242259 | 648.1738502 | 346.4944955 | 0.903135836  | 0.000198718 | 0.000804063 | C22orf39   |
| ENSG00000269927 | 4.163324793 | 31.81653401 | -2.922519835 | 0.00019893  | 0.000804797 | AC004817.3 |
| ENSG00000138758 | 1804.867958 | 4008.589038 | -1.1512762   | 0.000199406 | 0.000806596 | SEPT11     |
| ENSG00000173065 | 237.3364924 | 462.3120025 | -0.961669769 | 0.000199663 | 0.00080751  | FAM222B    |
| ENSG00000274031 | 18.1298886  | 1.10029862  | 4.065701671  | 0.00020048  | 0.000810687 | AC092140.2 |

|                 |             |             |              |             |             |            |
|-----------------|-------------|-------------|--------------|-------------|-------------|------------|
| ENSG0000007171  | 28.80851975 | 0.356539013 | 6.221207374  | 0.000201241 | 0.00081364  | NOS2       |
| ENSG00000108511 | 23.99652867 | 220.0575669 | -3.198499044 | 0.000201683 | 0.000815299 | HOXB6      |
| ENSG00000131115 | 210.7777676 | 97.76599035 | 1.110355896  | 0.000201766 | 0.000815508 | ZNF227     |
| ENSG00000188002 | 135.9831322 | 30.25259122 | 2.161860562  | 0.000201876 | 0.000815824 | AC026412.1 |
| ENSG00000228655 | 22.17480025 | 0.713078025 | 4.951845123  | 0.000201931 | 0.000815921 | AC079793.1 |
| ENSG00000104897 | 600.4615831 | 1087.197405 | -0.856229165 | 0.000202146 | 0.000816663 | SF3A2      |
| ENSG00000257261 | 22.16498452 | 79.88551056 | -1.85286564  | 0.000202237 | 0.000816904 | AC008014.1 |
| ENSG00000172466 | 2266.065322 | 1246.792179 | 0.862181962  | 0.000202413 | 0.000817488 | ZNF24      |
| ENSG00000096092 | 697.2150345 | 283.6579112 | 1.296530287  | 0.00020267  | 0.000818397 | TMEM14A    |
| ENSG00000251179 | 0.894837599 | 17.67333312 | -4.291528959 | 0.00020291  | 0.000819241 | TMEM92-AS1 |
| ENSG00000198146 | 248.3390222 | 547.877817  | -1.141107464 | 0.000203132 | 0.000819975 | ZNF770     |
| ENSG00000106976 | 127.5032513 | 1087.613643 | -3.092642289 | 0.000203166 | 0.000819975 | DNM1       |
| ENSG00000144410 | 19.09403324 | 0.774441189 | 4.709982748  | 0.000203187 | 0.000819975 | CPO        |
| ENSG00000280011 | 12.12896488 | 0           | 5.933933311  | 0.000203293 | 0.000820133 | AL031595.2 |
| ENSG00000285530 | 11.87730825 | 0           | 5.903127388  | 0.000203316 | 0.000820133 | AL445928.2 |
| ENSG00000214182 | 124.3598453 | 238.8607243 | -0.941728238 | 0.000203321 | 0.000820133 | PTMAP5     |
| ENSG00000143994 | 59.54965919 | 6.33729745  | 3.247167096  | 0.000203951 | 0.000822549 | ABHD1      |
| ENSG00000243829 | 3675.611213 | 7199.494239 | -0.969915547 | 0.000204055 | 0.000822838 | AC011495.1 |
| ENSG00000004534 | 2794.513956 | 1557.501922 | 0.843425222  | 0.000204216 | 0.000823362 | RBM6       |
| ENSG00000117533 | 957.4705249 | 363.9553096 | 1.396279685  | 0.000204833 | 0.00082572  | VAMP4      |
| ENSG00000198492 | 1003.438065 | 1565.756807 | -0.641990078 | 0.000205673 | 0.000828976 | YTHDF2     |
| ENSG00000141298 | 753.6463172 | 410.6080187 | 0.876343163  | 0.00020634  | 0.000831539 | SSH2       |
| ENSG00000145916 | 727.8403672 | 340.8994634 | 1.093390893  | 0.000206682 | 0.000832786 | RMND5B     |
| novel.1086      | 39.0709805  | 4.300848999 | 3.183979046  | 0.000207378 | 0.000835462 | -          |
| ENSG00000229563 | 0           | 15.54813197 | -6.537451544 | 0.000207649 | 0.000836423 | LINC01204  |
| ENSG00000170161 | 153.6810389 | 30.40124723 | 2.335564556  | 0.000208587 | 0.000840073 | AL512625.1 |
| ENSG00000134198 | 12.49283768 | 0           | 5.976044747  | 0.000209154 | 0.000842226 | TSPAN2     |
| ENSG00000123739 | 618.5694602 | 361.0248698 | 0.776725936  | 0.000209211 | 0.000842324 | PLA2G12A   |
| ENSG00000172500 | 809.6688913 | 1608.276169 | -0.990232344 | 0.000209402 | 0.000842962 | FIBP       |
| ENSG00000169174 | 1.233423615 | 52.51518951 | -5.423339382 | 0.000209555 | 0.000843449 | PCSK9      |
| ENSG00000213024 | 826.906209  | 1359.676846 | -0.717621515 | 0.000209665 | 0.000843759 | NUP62      |
| ENSG00000174306 | 659.3980331 | 1421.023059 | -1.107702059 | 0.000210337 | 0.000846332 | ZHX3       |
| ENSG00000157741 | 740.7581664 | 325.3221313 | 1.187852209  | 0.000210684 | 0.000847597 | UBN2       |
| ENSG00000130052 | 781.074426  | 110.9350866 | 2.816137404  | 0.000210747 | 0.000847718 | STARD8     |
| ENSG00000286872 | 17.41517803 | 0.356539013 | 5.493113343  | 0.000211022 | 0.000848696 | AC024270.5 |
| ENSG00000160190 | 236.920678  | 45.10095459 | 2.389218231  | 0.000211626 | 0.00085099  | SLC37A1    |
| ENSG00000273507 | 15.09919663 | 0.387220594 | 5.288783218  | 0.000212056 | 0.000852589 | AL354809.1 |
| ENSG00000217027 | 22.73391513 | 1.783850939 | 3.666939894  | 0.000212589 | 0.0008546   | TPT1P4     |
| ENSG00000133937 | 17.10431483 | 0.356539013 | 5.467124499  | 0.000212832 | 0.000855445 | GSC        |
| ENSG00000073050 | 434.3047597 | 868.9971124 | -1.000244649 | 0.000213337 | 0.00085734  | XRCC1      |
| ENSG00000173020 | 2822.828032 | 1686.738194 | 0.742880865  | 0.00021367  | 0.000858546 | GRK2       |
| ENSG00000167394 | 57.19280523 | 150.6586399 | -1.398478787 | 0.000213713 | 0.000858585 | ZNF668     |
| ENSG00000185414 | 390.6427165 | 677.2592909 | -0.794289597 | 0.00021393  | 0.000859324 | MRPL30     |
| ENSG00000086758 | 2695.278469 | 4939.657167 | -0.873917949 | 0.000214321 | 0.000860762 | HUWE1      |
| ENSG00000165379 | 216.5869262 | 62.80453692 | 1.786154476  | 0.000214412 | 0.000860997 | LRFN5      |
| ENSG00000072422 | 263.0830777 | 561.7086583 | -1.094799787 | 0.000214628 | 0.00086163  | RHOBTB1    |
| ENSG00000171885 | 14.60981606 | 0           | 6.202164408  | 0.000214636 | 0.00086163  | AQP4       |
| ENSG00000100416 | 559.2864896 | 1160.31707  | -1.052685514 | 0.00021472  | 0.000861834 | TRMU       |
| ENSG00000111886 | 23.25986533 | 2.261960402 | 3.403972975  | 0.000215292 | 0.000863995 | GABRR2     |
| ENSG00000269343 | 103.5698761 | 213.9991006 | -1.046618437 | 0.000216078 | 0.000867017 | ZNF587B    |
| ENSG00000175309 | 1193.356331 | 604.7052043 | 0.980747707  | 0.00021652  | 0.000868655 | PHYKPL     |

|                 |             |             |              |             |             |            |
|-----------------|-------------|-------------|--------------|-------------|-------------|------------|
| ENSG00000074071 | 980.8457976 | 1862.572761 | -0.925376164 | 0.000217112 | 0.000870893 | MRPS34     |
| ENSG00000155961 | 40.42241782 | 5.095359283 | 2.994616581  | 0.000217496 | 0.000872301 | RAB39B     |
| ENSG00000185989 | 192.1438106 | 385.9776051 | -1.006821501 | 0.000217631 | 0.000872707 | RASA3      |
| ENSG00000261671 | 18.1954347  | 0.723690511 | 4.661654698  | 0.000217737 | 0.000872996 | AL158211.1 |
| ENSG00000177889 | 1264.204833 | 2113.083422 | -0.741249364 | 0.000217882 | 0.000873445 | UBE2N      |
| ENSG00000161912 | 163.0685626 | 75.72689623 | 1.109559349  | 0.000219401 | 0.000879398 | ADCY10P1   |
| ENSG00000119906 | 1339.397907 | 667.8263517 | 1.004052102  | 0.000219603 | 0.000880072 | SLF2       |
| ENSG00000130299 | 268.478189  | 486.3121961 | -0.856516341 | 0.000220027 | 0.000881637 | GTPBP3     |
| ENSG00000152518 | 3678.435416 | 1119.491654 | 1.716042345  | 0.000220145 | 0.00088197  | ZFP36L2    |
| ENSG00000119318 | 2428.607443 | 4360.566932 | -0.844455541 | 0.000221033 | 0.000885303 | RAD23B     |
| ENSG00000182674 | 14.16159243 | 0           | 6.158076437  | 0.000221045 | 0.000885303 | KCNB2      |
| ENSG00000196642 | 1689.686627 | 2689.346716 | -0.670478736 | 0.000221802 | 0.0008882   | RABL6      |
| ENSG00000250241 | 26.53476331 | 1.130980201 | 4.596169826  | 0.000222181 | 0.000889581 | AC105383.1 |
| ENSG00000280604 | 1.847628125 | 26.71642283 | -3.8638303   | 0.000222497 | 0.000890708 | AJ239328.1 |
| ENSG00000185432 | 2197.100615 | 304.5256898 | 2.850453412  | 0.000222785 | 0.000891722 | METTL7A    |
| ENSG00000133104 | 2593.576364 | 1520.182285 | 0.770502548  | 0.000222926 | 0.000892152 | SPART      |
| ENSG00000104415 | 71.13708739 | 1036.442714 | -3.865254272 | 0.000223104 | 0.000892725 | CCN4       |
| novel.127       | 10.85904291 | 0           | 5.775112086  | 0.000223445 | 0.000893951 | -          |
| ENSG00000084092 | 284.4410517 | 584.2635602 | -1.038609211 | 0.000223561 | 0.000894204 | NOA1       |
| ENSG00000177576 | 186.1663502 | 87.69830208 | 1.084024539  | 0.000223577 | 0.000894204 | C18orf32   |
| ENSG00000178726 | 299.1817454 | 3366.198858 | -3.49203629  | 0.00022364  | 0.000894319 | THBD       |
| ENSG00000182048 | 25.47623831 | 1.161661783 | 4.523310492  | 0.000224509 | 0.000897658 | TRPC2      |
| ENSG00000130720 | 3.082305388 | 278.12438   | -6.498591258 | 0.000224619 | 0.000897959 | FIBCD1     |
| ENSG00000253620 | 15.20980315 | 0           | 6.261832841  | 0.000224657 | 0.000897972 | AC144568.1 |
| ENSG00000269404 | 15.19497283 | 0.387220594 | 5.296849073  | 0.000225059 | 0.000899371 | SPIB       |
| ENSG00000165672 | 1545.857189 | 3108.762671 | -1.008032149 | 0.000225076 | 0.000899371 | PRDX3      |
| ENSG00000215045 | 24.85938431 | 0.693008929 | 5.12910243   | 0.000225633 | 0.000901421 | GRID2IP    |
| ENSG00000198440 | 171.1334551 | 59.80729322 | 1.512728226  | 0.000225659 | 0.000901421 | ZNF583     |
| ENSG00000037749 | 129.8298752 | 320.2956649 | -1.303494938 | 0.000226151 | 0.000903248 | MFAP3      |
| ENSG00000183426 | 4.294345703 | 29.48375383 | -2.786998634 | 0.000226499 | 0.000904499 | NPIPA1     |
| ENSG00000285269 | 20.38763235 | 1.049547942 | 4.254749819  | 0.000226557 | 0.000904593 | AL160269.1 |
| ENSG00000268555 | 22.02615698 | 0.387220594 | 5.834306404  | 0.000228917 | 0.000913873 | AC123912.4 |
| ENSG00000129596 | 332.8906226 | 36.54042226 | 3.184958942  | 0.00022907  | 0.000914344 | CDO1       |
| ENSG00000147606 | 26.73989204 | 1.161661783 | 4.591369184  | 0.000229428 | 0.000915632 | SLC26A7    |
| ENSG00000229694 | 24.1971848  | 1.080229524 | 4.489736468  | 0.000229507 | 0.000915807 | AL158071.1 |
| ENSG00000196267 | 107.6089468 | 43.55497908 | 1.30924315   | 0.00022965  | 0.000916239 | ZNF836     |
| ENSG00000237870 | 0           | 10.11874292 | -5.919019792 | 0.000229975 | 0.000917394 | AC073130.1 |
| ENSG00000135407 | 237.9631781 | 63.22744778 | 1.910408176  | 0.000230921 | 0.000921025 | AVIL       |
| ENSG00000123685 | 75.10294824 | 18.120761   | 2.047033801  | 0.000232028 | 0.000925299 | BATF3      |
| ENSG00000231764 | 14.68524879 | 0           | 6.209182892  | 0.000232296 | 0.000926226 | DLX6-AS1   |
| ENSG00000152413 | 88.30645082 | 208.0062698 | -1.23604184  | 0.000232499 | 0.000926894 | HOMER1     |
| ENSG00000168852 | 22.98299319 | 3.647978261 | 2.669379216  | 0.000234503 | 0.000934737 | TPTE2P5    |
| ENSG00000143013 | 2109.100792 | 1022.516785 | 1.044783356  | 0.00023468  | 0.000935299 | LMO4       |
| ENSG00000143147 | 265.1604817 | 583.0348843 | -1.136594381 | 0.000234836 | 0.000935778 | GPR161     |
| ENSG00000124191 | 97.59566321 | 530.5279834 | -2.442692598 | 0.00023492  | 0.000935969 | TOX2       |
| ENSG00000101470 | 15.84692935 | 0.336469917 | 5.35711916   | 0.000235064 | 0.000936401 | TNNC2      |
| ENSG00000006744 | 956.6586301 | 1840.574177 | -0.944175521 | 0.00023538  | 0.000937513 | ELAC2      |
| ENSG00000114302 | 586.3819767 | 1031.362278 | -0.814542467 | 0.000236244 | 0.000940731 | PRKAR2A    |
| ENSG00000088766 | 106.7405784 | 217.39559   | -1.025825561 | 0.00023626  | 0.000940731 | CRLS1      |
| ENSG00000139055 | 29.59708124 | 2.751966622 | 3.395947646  | 0.000236856 | 0.000942961 | ERP27      |
| ENSG00000147509 | 21.64390637 | 182.2642903 | -3.074165302 | 0.000237492 | 0.000945347 | RGS20      |



|                 |             |             |              |             |             |              |
|-----------------|-------------|-------------|--------------|-------------|-------------|--------------|
| ENSG00000167700 | 227.5405184 | 583.9404816 | -1.359589034 | 0.000237743 | 0.0009462   | MFSD3        |
| ENSG00000213753 | 352.5104516 | 695.4449042 | -0.980030157 | 0.000238292 | 0.00094824  | CENPBD1P1    |
| ENSG00000115008 | 30.34542687 | 523.9921998 | -4.109479129 | 0.000238846 | 0.000950299 | IL1A         |
| ENSG00000059804 | 563.4799823 | 1994.865055 | -1.823942019 | 0.000238915 | 0.00095043  | SLC2A3       |
| ENSG00000204934 | 125.4519337 | 21.74178209 | 2.520675036  | 0.00023896  | 0.000950462 | ATP6V0E2-AS1 |
| ENSG00000234072 | 82.0031547  | 175.2830776 | -1.096255386 | 0.000239363 | 0.000951919 | AC074117.1   |
| ENSG00000115042 | 470.0834333 | 791.0351783 | -0.750619665 | 0.000239896 | 0.000953893 | FAHD2A       |
| ENSG00000242574 | 21.86526196 | 0           | 6.784733813  | 0.000240179 | 0.000954874 | HLA-DMB      |
| ENSG00000177125 | 363.5768896 | 184.348501  | 0.980830405  | 0.000240634 | 0.000956534 | ZBTB34       |
| ENSG00000167291 | 1326.969114 | 2684.586373 | -1.016596364 | 0.000240768 | 0.000956921 | TBC1D16      |
| ENSG00000254102 | 11.99292937 | 0           | 5.919006554  | 0.000240947 | 0.000957488 | AC090136.3   |
| ENSG00000145934 | 463.8052211 | 30.83921851 | 3.909856779  | 0.000241203 | 0.000958356 | TENM2        |
| novel.253       | 11.4291559  | 0           | 5.849248237  | 0.000241275 | 0.000958495 | -            |
| ENSG00000187634 | 68.72575741 | 846.9900123 | -3.623892211 | 0.000241836 | 0.000960579 | SAMD11       |
| ENSG00000134802 | 451.1574607 | 1257.615431 | -1.47871722  | 0.000242133 | 0.000961611 | SLC43A3      |
| ENSG00000172183 | 380.6903519 | 98.61073773 | 1.950849463  | 0.000242985 | 0.000964848 | ISG20        |
| ENSG00000167522 | 2211.247521 | 4369.852161 | -0.98263649  | 0.000243215 | 0.000965611 | ANKRD11      |
| ENSG00000229119 | 159.3658554 | 320.8607423 | -1.010307538 | 0.00024414  | 0.000969138 | AC026403.1   |
| ENSG00000087088 | 1677.623973 | 3274.828327 | -0.964986488 | 0.000245617 | 0.000974852 | BAX          |
| ENSG00000174021 | 172.3232142 | 331.6329511 | -0.944771099 | 0.000245806 | 0.000975452 | GNG5         |
| ENSG00000178734 | 83.31520288 | 5.423656859 | 3.923540864  | 0.000246356 | 0.000977484 | LMO7DN       |
| ENSG00000250616 | 25.78849771 | 3.537020296 | 2.854961429  | 0.000247216 | 0.000980746 | AC012645.1   |
| ENSG00000119138 | 1024.3794   | 2723.730523 | -1.410721767 | 0.000247338 | 0.000981084 | KLF9         |
| ENSG00000032389 | 323.8318135 | 565.4390151 | -0.804525226 | 0.000247507 | 0.000981602 | EIPR1        |
| ENSG00000158423 | 35.69063313 | 5.992655192 | 2.56460898   | 0.000248949 | 0.000987172 | RIBC1        |
| ENSG00000087510 | 53.76786814 | 454.1590729 | -3.077986545 | 0.000250074 | 0.000991479 | TFAP2C       |
| ENSG00000043591 | 25.3367266  | 2.884149558 | 3.137514979  | 0.000250329 | 0.000992339 | ADRB1        |
| ENSG00000284713 | 37.7962574  | 3.749479616 | 3.358833813  | 0.000250403 | 0.00099248  | SMIM38       |
| ENSG00000261040 | 19.08916084 | 199.3100529 | -3.385960191 | 0.000251083 | 0.000994954 | WFDC21P      |
| ENSG00000273987 | 21.72693262 | 1.742556871 | 3.61389197   | 0.000251103 | 0.000994954 | AC121761.2   |
| ENSG00000076716 | 1173.758217 | 219.8838927 | 2.415548807  | 0.000251396 | 0.000995962 | GPC4         |
| ENSG00000276644 | 30.09817193 | 1.049547942 | 4.818864729  | 0.000252198 | 0.000998986 | DACH1        |
| ENSG00000258743 | 81.97963571 | 1.722487775 | 5.553914594  | 0.000252655 | 0.001000646 | LINC02301    |
| ENSG00000160294 | 866.2410422 | 1576.072632 | -0.863391052 | 0.000254777 | 0.001008896 | MCM3AP       |
| ENSG00000146282 | 536.7457915 | 888.7390348 | -0.727621139 | 0.00025492  | 0.001009229 | RARS2        |
| ENSG00000149131 | 6993.909738 | 2670.224806 | 1.389037131  | 0.000254939 | 0.001009229 | SERPING1     |
| ENSG00000152661 | 1069.855189 | 3826.749776 | -1.838795253 | 0.000256012 | 0.001013199 | GJA1         |
| ENSG00000133878 | 25.97252822 | 1.10029862  | 4.579111495  | 0.00025602  | 0.001013199 | DUSP26       |
| ENSG00000011028 | 2620.254116 | 13183.16861 | -2.330941674 | 0.000256109 | 0.001013398 | AC080038.1   |
| ENSG00000120837 | 862.8870619 | 448.8088893 | 0.942463551  | 0.000256289 | 0.001013954 | NFYB         |
| ENSG00000137693 | 1659.371213 | 3141.059488 | -0.920628954 | 0.000256477 | 0.001014544 | YAP1         |
| ENSG00000136045 | 820.820665  | 1467.588245 | -0.83831884  | 0.000256606 | 0.001014902 | PWP1         |
| ENSG00000273013 | 13.70577564 | 0           | 6.111898507  | 0.000257111 | 0.001016743 | AC117490.2   |
| ENSG00000113522 | 30.12031068 | 88.51296267 | -1.553862208 | 0.000257443 | 0.001017831 | RAD50        |
| ENSG00000134460 | 22.75160841 | 0           | 6.841064858  | 0.000257465 | 0.001017831 | IL2RA        |
| ENSG00000227218 | 27.14123212 | 3.515795324 | 2.933662981  | 0.000257673 | 0.0010185   | AL157935.1   |
| ENSG00000160401 | 17.31320486 | 64.19068318 | -1.892591202 | 0.000257993 | 0.001019612 | CFAP157      |
| ENSG00000212743 | 24.9966022  | 3.647978261 | 2.790160357  | 0.000258356 | 0.001020887 | LINC02656    |
| ENSG00000109113 | 1705.789027 | 3073.379027 | -0.849370069 | 0.000258635 | 0.001021836 | RAB34        |
| ENSG00000162975 | 26.01773084 | 1.456837632 | 4.169220779  | 0.000259412 | 0.001024751 | KCNF1        |
| ENSG00000255435 | 24.70593992 | 3.251301057 | 2.93212995   | 0.000260012 | 0.001026966 | AP001267.3   |

|                 |             |             |              |             |             |            |
|-----------------|-------------|-------------|--------------|-------------|-------------|------------|
| ENSG00000108932 | 80.47336933 | 2800.863098 | -5.121357651 | 0.000260126 | 0.001027257 | SLC16A6    |
| ENSG00000160410 | 666.9707099 | 1459.843187 | -1.12995274  | 0.000260288 | 0.001027742 | SHKBP1     |
| ENSG00000012061 | 1119.464138 | 2135.19993  | -0.931419927 | 0.000261215 | 0.001031247 | ERCC1      |
| ENSG00000069869 | 390.9509458 | 1431.191556 | -1.871904024 | 0.000261446 | 0.001031844 | NEDD4      |
| ENSG00000165501 | 91.18230221 | 220.3204857 | -1.274358954 | 0.000261485 | 0.001031844 | LRR1       |
| ENSG00000102024 | 1852.900324 | 3862.629543 | -1.059904714 | 0.000261486 | 0.001031844 | PLS3       |
| ENSG00000101236 | 813.2264036 | 1281.094238 | -0.655678519 | 0.000261562 | 0.001031988 | RNF24      |
| ENSG00000272599 | 3.637303322 | 24.67282952 | -2.760499189 | 0.000262058 | 0.001033787 | AC016394.2 |
| ENSG00000186376 | 379.3454513 | 211.2176083 | 0.844847887  | 0.000263183 | 0.00103807  | ZNF75D     |
| ENSG00000115364 | 590.5096421 | 1033.314421 | -0.80736051  | 0.000263267 | 0.001038243 | MRPL19     |
| ENSG00000286449 | 21.82675451 | 0           | 6.781165102  | 0.000263606 | 0.001039302 | AC016590.4 |
| ENSG00000103018 | 1021.107222 | 1691.8598   | -0.728639207 | 0.000263616 | 0.001039302 | CYB5B      |
| ENSG00000102409 | 1382.686159 | 532.8116008 | 1.37635203   | 0.000264182 | 0.001041378 | BEX4       |
| ENSG00000160446 | 367.0354614 | 704.5898249 | -0.941062463 | 0.000264222 | 0.001041378 | ZDHHC12    |
| ENSG00000124802 | 112.8747452 | 273.3225993 | -1.276550713 | 0.000264282 | 0.001041454 | EEF1E1     |
| ENSG00000143771 | 627.3085905 | 1122.978121 | -0.840292528 | 0.000264534 | 0.001042216 | CNIH4      |
| ENSG00000087502 | 791.9133052 | 1324.991338 | -0.742681593 | 0.000264555 | 0.001042216 | ERGIC2     |
| ENSG00000163092 | 22.43469077 | 0           | 6.820837759  | 0.000265018 | 0.00104388  | XIRP2      |
| ENSG00000272320 | 25.80207438 | 1.874739808 | 3.818208167  | 0.000265269 | 0.00104471  | AL445309.1 |
| ENSG00000185567 | 307.0657547 | 1758.735355 | -2.517976528 | 0.00026595  | 0.001047235 | AHNAK2     |
| ENSG00000152234 | 4717.313429 | 9270.402068 | -0.974682741 | 0.000266299 | 0.001048448 | ATP5F1A    |
| ENSG00000229212 | 3.968367446 | 26.26082261 | -2.731313507 | 0.000266422 | 0.001048773 | AC044860.1 |
| ENSG00000101608 | 3654.80161  | 7944.83868  | -1.120248249 | 0.000267445 | 0.00105264  | MYL12A     |
| ENSG00000244754 | 2043.463171 | 1164.933827 | 0.810934034  | 0.000267821 | 0.001053922 | N4BP2L2    |
| ENSG00000114859 | 241.5620296 | 106.4902863 | 1.183841126  | 0.000267851 | 0.001053922 | CLCN2      |
| ENSG00000232457 | 4.546002329 | 59.59615253 | -3.71120793  | 0.000268077 | 0.001054649 | SLC16A6P1  |
| ENSG00000232098 | 102.3881372 | 201.1352791 | -0.973160302 | 0.000269051 | 0.001058322 | AC012313.1 |
| ENSG00000178567 | 850.9241797 | 442.075929  | 0.94456726   | 0.000269852 | 0.001061311 | EPM2AIP1   |
| ENSG00000112701 | 2227.739042 | 1266.545755 | 0.814666977  | 0.000270286 | 0.001062858 | SENP6      |
| ENSG00000108700 | 99.13412397 | 12.16580385 | 3.032953882  | 0.000270596 | 0.001063914 | CCL8       |
| ENSG00000122435 | 467.8624452 | 224.3235903 | 1.059794838  | 0.00027074  | 0.001064197 | TRMT13     |
| ENSG00000287125 | 2.460578986 | 25.1202574  | -3.360530675 | 0.000270749 | 0.001064197 | AC018695.9 |
| ENSG00000186814 | 938.3129592 | 394.6437356 | 1.249856847  | 0.000272812 | 0.001072142 | ZSCAN30    |
| ENSG00000160145 | 100.7464917 | 13.08432474 | 2.94742602   | 0.000274315 | 0.001077887 | KALRN      |
| ENSG00000102962 | 13.74631968 | 0           | 6.113925108  | 0.000274497 | 0.001078437 | CCL22      |
| ENSG00000175544 | 16.2066852  | 0.336469917 | 5.391608954  | 0.00027467  | 0.001078955 | CABP4      |
| ENSG00000174502 | 0           | 10.60746487 | -5.985433638 | 0.00027495  | 0.00107989  | SLC26A9    |
| novel.499       | 38.72752208 | 5.798980698 | 2.745984947  | 0.000275597 | 0.001082267 | -          |
| ENSG00000109339 | 375.770601  | 84.23749542 | 2.155011813  | 0.000275654 | 0.001082329 | MAPK10     |
| ENSG00000130037 | 10.64263099 | 0           | 5.74489476   | 0.000275869 | 0.001083007 | KCNA5      |
| ENSG00000158714 | 18.20539261 | 0.356539013 | 5.55801653   | 0.000277546 | 0.001089427 | SLAMF8     |
| ENSG00000154803 | 806.6121032 | 408.4653174 | 0.982343185  | 0.000277628 | 0.001089584 | FLCN       |
| ENSG00000136699 | 895.225829  | 1827.69652  | -1.029614929 | 0.000278014 | 0.001090846 | SMPD4      |
| novel.545       | 0.308355904 | 12.92261609 | -5.311113724 | 0.000278033 | 0.001090846 | -          |
| ENSG00000112039 | 131.4711643 | 356.6612106 | -1.439674153 | 0.000278395 | 0.0010921   | FANCE      |
| ENSG00000156642 | 1131.992162 | 1939.538171 | -0.776950122 | 0.000278594 | 0.001092718 | NPTN       |
| ENSG00000109381 | 668.6586977 | 392.4171271 | 0.768263705  | 0.00027911  | 0.001094575 | ELF2       |
| ENSG00000187837 | 215.7083853 | 101.9867385 | 1.080304288  | 0.000279647 | 0.001096515 | HIST1H1C   |
| ENSG00000250334 | 12.8125477  | 0           | 6.012473327  | 0.00027982  | 0.001097029 | LINC00989  |
| ENSG00000267586 | 16.03819702 | 0.356539013 | 5.375455927  | 0.000280161 | 0.001098201 | LINC00907  |
| ENSG00000144908 | 63.34899612 | 2.793260689 | 4.491423046  | 0.000280355 | 0.001098796 | ALDH1L1    |

|                 |             |             |              |             |             |            |
|-----------------|-------------|-------------|--------------|-------------|-------------|------------|
| ENSG00000171346 | 0           | 10.63814645 | -5.989192028 | 0.000280516 | 0.001099261 | KRT15      |
| ENSG00000143786 | 77.8428354  | 629.8208011 | -3.016355525 | 0.000280713 | 0.001099864 | CNIH3      |
| ENSG00000213976 | 48.90660093 | 6.827303669 | 2.842075496  | 0.000281684 | 0.001103503 | AC010615.1 |
| ENSG00000089693 | 2726.494744 | 4590.0956   | -0.751395174 | 0.000281996 | 0.001104559 | MLF2       |
| ENSG00000130270 | 34.65398998 | 106.6034276 | -1.620295668 | 0.000282091 | 0.001104765 | ATP8B3     |
| ENSG00000066739 | 1214.593002 | 552.0732434 | 1.137669324  | 0.000282448 | 0.001105996 | ATG2B      |
| ENSG00000272515 | 11.70728169 | 0           | 5.884088626  | 0.000282693 | 0.00110679  | AL355578.1 |
| ENSG00000018408 | 3494.503265 | 1442.511652 | 1.276299025  | 0.000282865 | 0.001107253 | WWTR1      |
| ENSG00000120647 | 139.5658872 | 317.5639089 | -1.187035551 | 0.000282897 | 0.001107253 | CCDC77     |
| ENSG00000166743 | 13.16743114 | 0           | 6.051568262  | 0.000283173 | 0.001108166 | ACSM1      |
| ENSG00000115828 | 82.86492671 | 587.4500399 | -2.825740398 | 0.000283824 | 0.001110547 | QPCT       |
| ENSG00000232934 | 20.81064045 | 2.567748738 | 3.038624469  | 0.000284966 | 0.001114731 | AL157786.1 |
| ENSG00000196139 | 444.9428413 | 56.70109934 | 2.971034268  | 0.000284979 | 0.001114731 | AKR1C3     |
| ENSG00000165476 | 1026.025544 | 1754.56784  | -0.774002732 | 0.000285869 | 0.001118045 | REEP3      |
| ENSG00000126012 | 1403.118339 | 3769.054594 | -1.425487577 | 0.000286113 | 0.001118829 | KDM5C      |
| ENSG00000282221 | 10.31916003 | 0           | 5.700617842  | 0.000286446 | 0.001119961 | AC119427.1 |
| ENSG00000273032 | 14.21947409 | 0.336469917 | 5.201866063  | 0.000286664 | 0.001120648 | DGCR9      |
| ENSG00000230294 | 10.57840982 | 0           | 5.737039326  | 0.0002871   | 0.001122181 | LINC02370  |
| ENSG00000172318 | 23.49425561 | 2.129777466 | 3.453175006  | 0.000287675 | 0.001124259 | B3GALT1    |
| ENSG00000229891 | 25.33554422 | 2.058957692 | 3.584686526  | 0.000287766 | 0.001124449 | LINC01315  |
| ENSG00000123411 | 296.9647049 | 146.0812715 | 1.024646035  | 0.000288605 | 0.001127556 | IKZF4      |
| ENSG00000129347 | 424.6729709 | 804.6333968 | -0.922389838 | 0.000289391 | 0.001130455 | KRI1       |
| ENSG00000235961 | 74.65311496 | 29.57348683 | 1.337768193  | 0.00028961  | 0.001131143 | PNMA6A     |
| ENSG00000100593 | 0           | 11.88124049 | -6.147807793 | 0.0002902   | 0.001133275 | ISM2       |
| ENSG00000119640 | 94.91133605 | 191.2408111 | -1.01111386  | 0.000290511 | 0.001134321 | ACYP1      |
| ENSG00000049860 | 1434.979739 | 3363.762997 | -1.229095848 | 0.000291451 | 0.001137819 | HEXB       |
| ENSG00000153814 | 597.050504  | 238.9824703 | 1.320689116  | 0.000292059 | 0.001140021 | JAZF1      |
| ENSG00000149124 | 11.28079737 | 0           | 5.828655318  | 0.000292238 | 0.001140551 | GLYAT      |
| ENSG00000197771 | 1161.62533  | 1995.748377 | -0.780956396 | 0.000292357 | 0.001140841 | MCMBP      |
| ENSG00000215414 | 13.39394352 | 51.80715453 | -1.951180908 | 0.000292834 | 0.00114253  | PSMA6P1    |
| ENSG00000197852 | 643.6908429 | 197.3551523 | 1.706676987  | 0.000293589 | 0.001145307 | INKA2      |
| ENSG00000168653 | 1758.307657 | 3745.350964 | -1.090876939 | 0.000294892 | 0.001150217 | NDUFS5     |
| ENSG00000158186 | 3428.420238 | 1582.757166 | 1.115000993  | 0.000295951 | 0.001154175 | MRAS       |
| ENSG00000160113 | 723.4312827 | 1303.084847 | -0.848882329 | 0.000297003 | 0.001158102 | NR2F6      |
| ENSG00000283399 | 11.48334788 | 0           | 5.85544056   | 0.000297057 | 0.001158138 | AC004381.2 |
| ENSG00000163512 | 278.1341372 | 516.0789719 | -0.892222493 | 0.00029722  | 0.001158601 | AZI2       |
| novel.1064      | 20.46105633 | 0.723690511 | 4.82966273   | 0.000297937 | 0.001161221 | -          |
| ENSG00000217702 | 19.17093344 | 0.693008929 | 4.749977628  | 0.00029802  | 0.00116137  | AC073263.1 |
| ENSG00000115520 | 487.0476232 | 841.2420918 | -0.788257914 | 0.000298124 | 0.001161461 | COQ10B     |
| ENSG00000135740 | 110.0544107 | 278.9049511 | -1.34049908  | 0.000298133 | 0.001161461 | SLC9A5     |
| ENSG00000259319 | 43.58356124 | 7.653779805 | 2.493560156  | 0.000299334 | 0.001165968 | AF111167.2 |
| ENSG00000111344 | 10.97620241 | 0           | 5.789117744  | 0.00029962  | 0.001166907 | RASAL1     |
| ENSG00000205838 | 24.14245118 | 2.129777466 | 3.492506495  | 0.000299765 | 0.001167297 | TTC23L     |
| ENSG00000277299 | 10.28642262 | 0           | 5.696517743  | 0.000299872 | 0.001167537 | AC084876.1 |
| ENSG00000153187 | 6287.476662 | 10799.76161 | -0.780472424 | 0.000300373 | 0.001169314 | HNRNPU     |
| ENSG00000132825 | 213.3512035 | 100.0128903 | 1.092382989  | 0.000300439 | 0.001169393 | PPP1R3D    |
| ENSG00000260455 | 10.63636274 | 0           | 5.74414658   | 0.000300774 | 0.001170416 | NBAT1      |
| ENSG00000152822 | 10.25995345 | 0           | 5.693189977  | 0.000300792 | 0.001170416 | GRM1       |
| ENSG00000137806 | 301.6545063 | 550.6818445 | -0.868750147 | 0.000301336 | 0.00117236  | NDUFAF1    |
| ENSG00000235194 | 263.2289728 | 143.8843986 | 0.871555018  | 0.000303083 | 0.001178977 | PPP1R3E    |
| ENSG00000186603 | 210.8924636 | 79.90057097 | 1.399555722  | 0.000303164 | 0.001179119 | HPDL       |

|                 |             |             |              |             |             |            |
|-----------------|-------------|-------------|--------------|-------------|-------------|------------|
| ENSG00000137955 | 957.7197612 | 1567.939788 | -0.711284789 | 0.000303533 | 0.001180377 | RABGGTB    |
| ENSG00000281392 | 74.40311143 | 12.8424681  | 2.524358859  | 0.000304294 | 0.001183047 | AC107204.1 |
| ENSG00000103647 | 1147.251593 | 251.8373616 | 2.186954734  | 0.000304311 | 0.001183047 | CORO2B     |
| ENSG00000150656 | 23.26272863 | 1.049547942 | 4.444898874  | 0.000305287 | 0.001186662 | CNDP1      |
| novel.610       | 42.79743578 | 3.199394504 | 3.7370291    | 0.000305568 | 0.00118758  | -          |
| ENSG00000162734 | 9984.185854 | 4188.643467 | 1.25311793   | 0.000305645 | 0.0011877   | PEA15      |
| ENSG00000112081 | 3550.045947 | 6606.943491 | -0.896193364 | 0.000305841 | 0.001188284 | SRSF3      |
| ENSG00000172586 | 412.718007  | 856.591695  | -1.053677881 | 0.000306243 | 0.001189669 | CHCHD1     |
| ENSG00000258168 | 20.70859601 | 1.793307549 | 3.529871836  | 0.000307559 | 0.0011946   | AC025569.1 |
| ENSG00000118257 | 5000.793725 | 1835.826441 | 1.44587658   | 0.000310708 | 0.001206652 | NRP2       |
| ENSG00000216819 | 25.63985444 | 3.302051734 | 2.974364509  | 0.000311279 | 0.001208688 | TUBB2BP1   |
| ENSG00000262823 | 11.92014612 | 0           | 5.908013622  | 0.000311439 | 0.001209129 | AC127521.1 |
| ENSG00000158966 | 42.24594154 | 200.3973801 | -2.247040951 | 0.000311572 | 0.001209467 | CACHD1     |
| ENSG00000154380 | 605.9320932 | 2697.100606 | -2.154310102 | 0.000312855 | 0.001214264 | ENAH       |
| ENSG00000081870 | 287.4362142 | 524.197599  | -0.867208404 | 0.000313177 | 0.001215334 | HSPB11     |
| ENSG00000185627 | 1705.271329 | 2793.508892 | -0.712081947 | 0.000314177 | 0.001219031 | PSMD13     |
| ENSG00000287151 | 33.23793205 | 80.95456684 | -1.281913924 | 0.000314928 | 0.001221762 | C2orf27A   |
| ENSG00000266904 | 94.42543169 | 37.22829411 | 1.345634172  | 0.000315153 | 0.001222453 | LINC00663  |
| ENSG00000275409 | 14.46987706 | 0.336469917 | 5.227626913  | 0.000315226 | 0.001222555 | AC026367.2 |
| ENSG00000131969 | 39.28885953 | 6.123682254 | 2.684189361  | 0.000315709 | 0.001224245 | ABHD12B    |
| ENSG00000283486 | 20.12308323 | 0           | 6.665505379  | 0.000316214 | 0.001225901 | FAM95C     |
| ENSG00000117758 | 1575.307525 | 1020.027317 | 0.627148607  | 0.000316231 | 0.001225901 | STX12      |
| ENSG00000169689 | 508.7828335 | 895.4386634 | -0.815707295 | 0.000316618 | 0.001227221 | CENPX      |
| novel.70        | 19.36589079 | 0.774441189 | 4.726765422  | 0.000317167 | 0.001229162 | -          |
| ENSG00000182648 | 213.7779447 | 102.2839222 | 1.066124898  | 0.000317912 | 0.001231867 | LINC01006  |
| novel.381       | 15.1634178  | 0.336469917 | 5.294221314  | 0.000318009 | 0.001232059 | -          |
| ENSG00000137054 | 273.9405113 | 562.7971542 | -1.039418199 | 0.000318117 | 0.001232294 | POLR1E     |
| ENSG00000168701 | 593.2791895 | 1018.762532 | -0.780039443 | 0.000318592 | 0.001233949 | TMEM208    |
| ENSG00000102043 | 16.19686947 | 0.336469917 | 5.388433248  | 0.000319284 | 0.001236446 | MTMR8      |
| ENSG00000125827 | 1382.496343 | 722.6974857 | 0.935367471  | 0.000319706 | 0.001237895 | TMX4       |
| ENSG00000173611 | 251.3657394 | 138.7195038 | 0.856705908  | 0.000319939 | 0.001238615 | SCAI       |
| ENSG00000049769 | 268.8067024 | 133.7664264 | 1.008160248  | 0.000320422 | 0.001240297 | PPP1R3F    |
| ENSG00000127129 | 16.28122029 | 0           | 6.35797415   | 0.000320582 | 0.001240733 | EDN2       |
| ENSG00000186204 | 12.21714792 | 0           | 5.943649204  | 0.000320949 | 0.001241968 | CYP4F12    |
| ENSG00000171227 | 56.97757568 | 7.633710709 | 2.886260107  | 0.000321645 | 0.001244476 | TMEM37     |
| ENSG00000168306 | 418.7952062 | 74.10459118 | 2.496196042  | 0.000322519 | 0.001247514 | ACOX2      |
| ENSG00000176463 | 353.6773602 | 156.899783  | 1.173946879  | 0.000322526 | 0.001247514 | SLCO3A1    |
| ENSG00000104267 | 55.71113028 | 9.784713146 | 2.499002842  | 0.00032275  | 0.001248195 | CA2        |
| ENSG00000287544 | 0           | 10.98407298 | -6.035955518 | 0.000324439 | 0.001254541 | AC097518.2 |
| ENSG00000255112 | 813.7951476 | 1606.09028  | -0.981005057 | 0.00032469  | 0.001255322 | CHMP1B     |
| ENSG00000005884 | 2102.116131 | 8257.278793 | -1.973809258 | 0.000326503 | 0.001262145 | ITGA3      |
| ENSG00000116604 | 1034.948905 | 2192.443883 | -1.0828198   | 0.00032748  | 0.001265734 | MEF2D      |
| ENSG00000164451 | 19.62979917 | 0.356539013 | 5.668360427  | 0.000327903 | 0.001267179 | CALHM4     |
| ENSG00000197498 | 410.4557194 | 887.1828573 | -1.112439897 | 0.000328222 | 0.001268223 | RPF2       |
| ENSG00000151704 | 12.76329904 | 0           | 6.007305688  | 0.00032848  | 0.001269032 | KCNJ1      |
| ENSG00000144231 | 440.4674327 | 750.8375436 | -0.769781893 | 0.000329766 | 0.00127381  | POLR2D     |
| ENSG00000232386 | 40.07957266 | 4.106018629 | 3.307651574  | 0.000330651 | 0.001277041 | AC015712.1 |
| ENSG00000233967 | 94.794932   | 25.54543283 | 1.892707964  | 0.000330738 | 0.001277186 | AL359715.1 |
| ENSG00000143643 | 548.5656335 | 254.7135831 | 1.106826379  | 0.000330887 | 0.001277572 | TTC13      |
| ENSG00000198185 | 435.7842284 | 81.15034315 | 2.422970344  | 0.00033133  | 0.001279091 | ZNF334     |
| ENSG00000271730 | 18.90158319 | 1.10029862  | 4.122944272  | 0.000332249 | 0.00128245  | AL390208.1 |

|                 |             |             |              |             |             |            |
|-----------------|-------------|-------------|--------------|-------------|-------------|------------|
| ENSG00000286488 | 19.1230097  | 2.191140629 | 3.14137987   | 0.000332422 | 0.001282926 | AC103858.3 |
| ENSG00000277013 | 18.88897543 | 0.713078025 | 4.718448072  | 0.000332503 | 0.001283047 | AC008556.1 |
| ENSG00000206567 | 46.51973066 | 108.4123563 | -1.218596655 | 0.000332619 | 0.001283306 | AC022007.1 |
| ENSG00000132581 | 514.407802  | 1003.929404 | -0.964850778 | 0.000333056 | 0.001284799 | SDF2       |
| ENSG00000055332 | 1786.444449 | 3296.111827 | -0.883660869 | 0.000333693 | 0.001287067 | EIF2AK2    |
| ENSG00000167664 | 13.7879039  | 0           | 6.118079296  | 0.000334053 | 0.001288133 | TMIGD2     |
| ENSG00000128606 | 103.4012732 | 365.3984651 | -1.821829755 | 0.000334069 | 0.001288133 | LRRC17     |
| ENSG00000140470 | 24.11695092 | 1.345879667 | 4.10875314   | 0.000334406 | 0.001289241 | ADAMTS17   |
| ENSG00000258352 | 18.64580961 | 0.713078025 | 4.701465914  | 0.000334738 | 0.001290329 | AC119044.1 |
| ENSG00000132329 | 153.4893562 | 29.13106763 | 2.391767358  | 0.000334965 | 0.001291015 | RAMP1      |
| ENSG00000114982 | 1688.540548 | 931.7602262 | 0.857899294  | 0.000335297 | 0.001291913 | KANSL3     |
| ENSG00000175305 | 31.59912268 | 88.62165607 | -1.487226834 | 0.000335298 | 0.001291913 | CCNE2      |
| ENSG00000273148 | 52.57602875 | 18.42526507 | 1.517007243  | 0.000335465 | 0.001292366 | LINC00653  |
| ENSG00000183696 | 1334.038741 | 584.0415759 | 1.191533753  | 0.000336549 | 0.001296351 | UPP1       |
| ENSG00000287787 | 3.646150135 | 24.77574354 | -2.769596123 | 0.000336962 | 0.001297749 | AC092275.1 |
| ENSG00000104142 | 594.9653532 | 997.479783  | -0.745581123 | 0.000337054 | 0.001297912 | VPS18      |
| ENSG00000159231 | 119.2483173 | 43.80210118 | 1.440303507  | 0.000337936 | 0.001301115 | CBR3       |
| ENSG00000198218 | 1056.807899 | 1732.727793 | -0.713213439 | 0.000338137 | 0.001301693 | QRICH1     |
| ENSG00000215146 | 113.9088814 | 10.21451208 | 3.468076634  | 0.000338228 | 0.001301852 | BX322639.1 |
| ENSG00000100731 | 902.9710237 | 1907.649772 | -1.078868852 | 0.000338419 | 0.001302393 | PCNX1      |
| ENSG00000179820 | 1079.501508 | 3011.051953 | -1.479875884 | 0.00033866  | 0.001303129 | MYADM      |
| ENSG00000249852 | 1.848881773 | 29.0397464  | -3.982553877 | 0.000338767 | 0.001303179 | AC145676.1 |
| novel.585       | 5690.220059 | 473.4451173 | 3.587286026  | 0.000338773 | 0.001303179 | -          |
| ENSG00000205038 | 10.55695525 | 0           | 5.734374224  | 0.000340484 | 0.001309477 | PKHD1L1    |
| ENSG00000060982 | 822.5983929 | 2908.670532 | -1.821958663 | 0.000340511 | 0.001309477 | BCAT1      |
| ENSG00000159289 | 27.52956534 | 0           | 7.116382037  | 0.000341374 | 0.0013126   | GOLGA6A    |
| ENSG00000079156 | 54.12303667 | 162.7956887 | -1.587974707 | 0.000341761 | 0.001313895 | OSBPL6     |
| ENSG00000220201 | 45.16065674 | 14.35938463 | 1.653042604  | 0.000342575 | 0.001316827 | ZGLP1      |
| ENSG00000080546 | 1095.438614 | 314.5486979 | 1.799442399  | 0.000343753 | 0.001321161 | SESN1      |
| ENSG00000256597 | 10.52547149 | 0           | 5.730481504  | 0.000344035 | 0.001322049 | LINC02393  |
| ENSG00000117791 | 266.8219711 | 81.52900622 | 1.707692565  | 0.000344165 | 0.001322354 | MARC2      |
| ENSG00000123159 | 1732.881767 | 2853.378204 | -0.719564979 | 0.000344345 | 0.001322837 | GIPC1      |
| ENSG00000198752 | 1399.633597 | 2602.476129 | -0.894734601 | 0.000344393 | 0.001322837 | CDC42BPB   |
| ENSG00000153179 | 902.3277083 | 256.9541901 | 1.812066437  | 0.000344958 | 0.001324812 | RASSF3     |
| ENSG00000171365 | 512.5478675 | 221.6099637 | 1.208559773  | 0.000346765 | 0.001331556 | CLCN5      |
| ENSG00000126091 | 32.52927625 | 92.88565892 | -1.511818156 | 0.000347211 | 0.001333072 | ST3GAL3    |
| ENSG00000261008 | 2.654282684 | 32.62306944 | -3.606068832 | 0.000347598 | 0.001334358 | LINC01572  |
| ENSG00000102753 | 867.3128554 | 1534.919083 | -0.823664104 | 0.000349263 | 0.001340553 | KPNA3      |
| ENSG00000259884 | 199.7058039 | 1.682349583 | 6.871196561  | 0.00034968  | 0.001341809 | AC025259.3 |
| ENSG00000162434 | 2053.915948 | 5294.553088 | -1.366121323 | 0.000349727 | 0.001341809 | JAK1       |
| ENSG00000135093 | 297.5699482 | 157.5162871 | 0.91820231   | 0.000349745 | 0.001341809 | USP30      |
| ENSG00000170145 | 722.6899044 | 1184.454428 | -0.712799267 | 0.000350014 | 0.001342641 | SIK2       |
| ENSG00000167770 | 1279.972869 | 2144.641289 | -0.744654056 | 0.000350219 | 0.001343229 | OTUB1      |
| ENSG00000112655 | 370.2876182 | 2911.457783 | -2.975121728 | 0.000351513 | 0.001347992 | PTK7       |
| ENSG00000272572 | 36.47522021 | 9.069194976 | 2.013718916  | 0.000352969 | 0.001353379 | AL138762.1 |
| ENSG00000104365 | 1523.177857 | 867.4056982 | 0.81245897   | 0.000353241 | 0.001354222 | IKBKB      |
| ENSG00000063854 | 1143.504444 | 581.9297654 | 0.974196751  | 0.000353644 | 0.001355567 | HAGH       |
| ENSG00000139083 | 552.7710956 | 310.2105235 | 0.832965156  | 0.00035377  | 0.001355847 | ETV6       |
| ENSG00000102098 | 9.141182043 | 38.15280398 | -2.064122491 | 0.000354878 | 0.001359893 | SCML2      |
| ENSG00000173578 | 19.99291652 | 0           | 6.654485026  | 0.000355363 | 0.001361552 | XCR1       |
| ENSG00000099864 | 1606.755336 | 214.9554264 | 2.901344175  | 0.000356037 | 0.001363932 | PALM       |

|                 |             |             |              |             |             |            |
|-----------------|-------------|-------------|--------------|-------------|-------------|------------|
| ENSG00000142675 | 64.09447914 | 15.76547158 | 2.023405916  | 0.000356309 | 0.001364772 | CNKSRI     |
| ENSG00000164197 | 107.6366693 | 33.99462201 | 1.667666072  | 0.000356913 | 0.001366884 | RNF180     |
| ENSG00000237854 | 77.36381219 | 30.48969596 | 1.343310402  | 0.000357914 | 0.001370519 | LINC00674  |
| ENSG00000279499 | 11.71731088 | 0           | 5.885155401  | 0.000358795 | 0.001373688 | AL157770.1 |
| ENSG00000102038 | 791.3721798 | 1989.927735 | -1.330345525 | 0.000359317 | 0.001375483 | SMARCA1    |
| ENSG00000259763 | 17.88296184 | 0.356539013 | 5.533960724  | 0.00035944  | 0.001375696 | LINC02157  |
| ENSG00000198910 | 14234.71165 | 314.3416762 | 5.501046731  | 0.000359478 | 0.001375696 | L1CAM      |
| ENSG00000139324 | 456.25232   | 971.0457392 | -1.090102856 | 0.000360225 | 0.001378352 | TMTC3      |
| novel.73        | 235.2863576 | 55.68017802 | 2.075799676  | 0.000360983 | 0.001381048 | -          |
| ENSG00000253660 | 10.67160745 | 0           | 5.748510942  | 0.000361375 | 0.001382343 | AC008464.1 |
| ENSG00000231290 | 8.421100869 | 62.61646623 | -2.891360366 | 0.000362647 | 0.001387008 | APCDD1L-DT |
| ENSG00000146556 | 600.6928257 | 287.601438  | 1.063468717  | 0.000362788 | 0.001387342 | WASH2P     |
| ENSG00000151640 | 38.37202537 | 268.4344683 | -2.807301195 | 0.000363867 | 0.001391263 | DPYSL4     |
| novel.606       | 29.83773976 | 0.356539013 | 6.270459428  | 0.000364682 | 0.001394173 | -          |
| ENSG00000188211 | 20.42566908 | 95.4905918  | -2.227194189 | 0.000372786 | 0.001424947 | NCR3LG1    |
| ENSG00000183283 | 4095.46563  | 2422.577679 | 0.757521656  | 0.000374294 | 0.001430501 | DAZAP2     |
| ENSG00000183060 | 351.1788874 | 154.602098  | 1.182386945  | 0.000374922 | 0.001432688 | LYSMD4     |
| ENSG00000136463 | 328.2105104 | 613.4495013 | -0.902611667 | 0.000377221 | 0.001441262 | TACO1      |
| ENSG00000108785 | 55.41774689 | 13.66406395 | 2.021089428  | 0.000378135 | 0.001444454 | HSD17B1P1  |
| ENSG00000197712 | 1728.765057 | 3323.564657 | -0.942881346 | 0.000378266 | 0.001444828 | FAM114A1   |
| ENSG00000164885 | 171.2112805 | 426.1591991 | -1.315997045 | 0.000378583 | 0.001445828 | CDK5       |
| ENSG00000279806 | 0.293240848 | 13.33820652 | -5.356225559 | 0.00037939  | 0.001448698 | AC018629.1 |
| ENSG00000275734 | 8.484139662 | 31.22515483 | -1.880396921 | 0.00038014  | 0.001451347 | AC010538.1 |
| ENSG00000205609 | 317.0787557 | 642.7006452 | -1.019587277 | 0.000382264 | 0.001459242 | EIF3CL     |
| ENSG00000132964 | 244.0262987 | 429.3788252 | -0.815031249 | 0.000382905 | 0.001461474 | CDK8       |
| novel.652       | 27.47731083 | 80.10917748 | -1.541314867 | 0.000383034 | 0.001461753 | -          |
| ENSG00000167034 | 19.95355486 | 64.02542569 | -1.683877169 | 0.000383677 | 0.001463989 | NKX3-1     |
| ENSG00000254598 | 20.49379374 | 85.54943581 | -2.063613065 | 0.000384086 | 0.001465337 | CSNK2A3    |
| ENSG00000198466 | 309.9285179 | 696.5235923 | -1.167754207 | 0.000384527 | 0.001466802 | ZNF587     |
| ENSG00000116857 | 1113.898715 | 1892.998556 | -0.764944997 | 0.000385447 | 0.001470098 | TMEM9      |
| ENSG00000139405 | 266.6624281 | 550.7678531 | -1.046885406 | 0.000386094 | 0.001472349 | RITA1      |
| ENSG00000143952 | 774.3051073 | 474.507636  | 0.70679568   | 0.000386633 | 0.001474186 | VPS54      |
| ENSG00000169976 | 1032.219942 | 1969.15362  | -0.931935518 | 0.000387367 | 0.001476769 | SF3B5      |
| ENSG00000167977 | 591.0985038 | 998.9115426 | -0.757001318 | 0.000387475 | 0.001476965 | KCTD5      |
| ENSG00000183137 | 186.5398253 | 336.4207239 | -0.850997198 | 0.000387731 | 0.001477722 | CEP57L1    |
| ENSG00000091986 | 583.9905108 | 6640.827068 | -3.507408015 | 0.000388519 | 0.001480508 | CCDC80     |
| ENSG00000103375 | 10.2637144  | 0           | 5.693626866  | 0.00038892  | 0.00148182  | AQP8       |
| ENSG00000165271 | 670.0068879 | 1356.779959 | -1.018137306 | 0.000388977 | 0.00148182  | NOL6       |
| ENSG00000145506 | 72.89639099 | 5.390406738 | 3.779735817  | 0.000390024 | 0.00148559  | NKD2       |
| ENSG00000115604 | 33.92158578 | 129.7211286 | -1.936992088 | 0.000390791 | 0.001488093 | IL18R1     |
| ENSG00000135903 | 37.50268838 | 1.130980201 | 5.086001324  | 0.000390795 | 0.001488093 | PAX3       |
| ENSG00000198453 | 195.8090937 | 99.68472116 | 0.973952945  | 0.000391443 | 0.001490193 | ZNF568     |
| ENSG00000197358 | 2.751312536 | 28.66545004 | -3.384259153 | 0.000391523 | 0.001490193 | BNIP3P1    |
| ENSG00000136451 | 1595.281255 | 869.1155529 | 0.876448191  | 0.000391524 | 0.001490193 | VEZF1      |
| ENSG00000007264 | 56.49962049 | 7.520184204 | 2.926523044  | 0.000391576 | 0.001490193 | MATK       |
| ENSG00000180891 | 1849.890082 | 920.3149277 | 1.007002979  | 0.000391828 | 0.001490931 | CUEDC1     |
| ENSG00000196923 | 1710.595524 | 5439.998915 | -1.669153607 | 0.000392022 | 0.001491453 | PDLIM7     |
| ENSG00000087152 | 1133.821799 | 1789.060782 | -0.657839899 | 0.000392287 | 0.001492243 | ATXN7L3    |
| ENSG00000257894 | 62.18606192 | 2.038888596 | 4.904941064  | 0.000393006 | 0.001494759 | AC027288.3 |
| ENSG00000262873 | 30.81259777 | 4.1272436   | 2.928738746  | 0.000393245 | 0.001495299 | AC127496.5 |
| ENSG00000123810 | 53.85862975 | 110.1763949 | -1.032336932 | 0.000393263 | 0.001495299 | B9D2       |

|                 |             |             |              |             |             |            |
|-----------------|-------------|-------------|--------------|-------------|-------------|------------|
| ENSG00000236859 | 157.1533147 | 80.4599843  | 0.966156367  | 0.000393423 | 0.001495686 | NIFK-AS1   |
| ENSG00000101152 | 1618.626394 | 2862.527165 | -0.822426386 | 0.000394148 | 0.001498224 | DNAJC5     |
| ENSG00000105971 | 628.9998356 | 2346.942527 | -1.899789159 | 0.000394843 | 0.001500648 | CAV2       |
| novel.750       | 13.80309023 | 0           | 6.119630247  | 0.000394951 | 0.001500836 | -          |
| ENSG00000233354 | 11.09934542 | 0           | 5.807241152  | 0.000395347 | 0.001502123 | LINC00028  |
| ENSG00000244005 | 286.0449445 | 510.8934133 | -0.836894528 | 0.000395759 | 0.001503467 | NFS1       |
| ENSG00000109572 | 1843.800359 | 1182.83545  | 0.640382868  | 0.00039595  | 0.001503975 | CLCN3      |
| ENSG00000166401 | 335.1053462 | 583.5187388 | -0.800285948 | 0.000396416 | 0.001505423 | SERPINB8   |
| ENSG00000160991 | 898.8438246 | 1599.1321   | -0.831181779 | 0.000396448 | 0.001505423 | ORAI2      |
| novel.75        | 14.42077095 | 0.387220594 | 5.223178801  | 0.000398348 | 0.001512419 | -          |
| ENSG00000170955 | 2483.880687 | 1410.574294 | 0.816333034  | 0.000398601 | 0.001513156 | CAVIN3     |
| ENSG00000277767 | 22.30198894 | 2.873537073 | 2.957470144  | 0.000398776 | 0.001513601 | AL442128.2 |
| ENSG00000102678 | 13.80685117 | 0           | 6.120004776  | 0.00039959  | 0.00151647  | FGF9       |
| ENSG00000286873 | 43.72210404 | 14.04298381 | 1.639862719  | 0.00040036  | 0.001519168 | AC012306.3 |
| ENSG00000069329 | 1524.066238 | 2412.056337 | -0.662356328 | 0.000402008 | 0.001525201 | VPS35      |
| ENSG00000268947 | 34.86420493 | 4.178122672 | 3.042802451  | 0.000402641 | 0.00152738  | AC002128.1 |
| ENSG00000260816 | 11.88998728 | 0           | 5.904697101  | 0.000403387 | 0.001529985 | AC027279.1 |
| ENSG00000105447 | 507.3939842 | 1172.73336  | -1.20902525  | 0.000403948 | 0.001531888 | GRWD1      |
| ENSG00000213730 | 13.32463649 | 0.336469917 | 5.107923492  | 0.000404817 | 0.001534932 | POLD2P1    |
| ENSG00000197261 | 6.109236418 | 30.28784912 | -2.31636512  | 0.000404869 | 0.001534932 | C6orf141   |
| ENSG00000253476 | 49.9429159  | 12.57437781 | 1.990906173  | 0.000406349 | 0.001540177 | AC091185.1 |
| ENSG00000139160 | 98.92594631 | 44.48539671 | 1.153087059  | 0.00040637  | 0.001540177 | ETFBKMT    |
| ENSG00000136816 | 484.2796138 | 998.8444937 | -1.044812959 | 0.000406481 | 0.001540369 | TOR1B      |
| ENSG00000179240 | 159.5910432 | 76.70703706 | 1.05678459   | 0.000406988 | 0.001542068 | GVQW3      |
| ENSG00000179041 | 257.5778035 | 618.3841447 | -1.264039394 | 0.000407072 | 0.001542135 | RRS1       |
| ENSG00000109220 | 221.2410545 | 459.8431053 | -1.055508502 | 0.000407125 | 0.001542135 | CHIC2      |
| ENSG00000172159 | 804.3075604 | 347.8010417 | 1.20955564   | 0.00040756  | 0.00154356  | FRMD3      |
| ENSG00000172315 | 331.0061991 | 585.5300282 | -0.823278289 | 0.000407667 | 0.001543741 | TP53RK     |
| ENSG00000123454 | 24.75629968 | 4.993857928 | 2.305512994  | 0.000408564 | 0.001546911 | DBH        |
| ENSG00000235001 | 5.099746614 | 26.80389126 | -2.388970758 | 0.000409833 | 0.001551488 | EIF4A1P2   |
| ENSG00000168944 | 689.068611  | 410.5297501 | 0.747698221  | 0.000410259 | 0.001552847 | CEP120     |
| ENSG00000104881 | 183.3967312 | 523.4790674 | -1.512938895 | 0.000410311 | 0.001552847 | PPP1R13L   |
| ENSG00000248727 | 29.65349578 | 2.0188195   | 3.832097391  | 0.000410777 | 0.001554384 | LINC01948  |
| ENSG00000130347 | 78.64265224 | 165.9295761 | -1.078101731 | 0.000411092 | 0.00155535  | RTN4IP1    |
| ENSG00000285417 | 14.02208071 | 0           | 6.142853954  | 0.000412083 | 0.001558873 | BX571818.1 |
| ENSG00000185352 | 1.188078446 | 21.91842275 | -4.186506943 | 0.000412525 | 0.001560315 | HS6ST3     |
| ENSG00000100243 | 4747.381855 | 8907.192695 | -0.907845704 | 0.000413545 | 0.001563945 | CYB5R3     |
| novel.688       | 2.991615051 | 27.24443107 | -3.183224794 | 0.000416461 | 0.001574745 | -          |
| ENSG00000106526 | 33.92026121 | 4.565343267 | 2.88025482   | 0.000416586 | 0.001574989 | ACTR3C     |
| ENSG00000205707 | 450.4485049 | 179.2967132 | 1.327382827  | 0.000416742 | 0.00157535  | ETFRF1     |
| ENSG00000140990 | 1032.435686 | 1673.445683 | -0.696763735 | 0.000416905 | 0.001575735 | NDUFB10    |
| ENSG00000141404 | 128.8316685 | 48.52085236 | 1.405136443  | 0.000418267 | 0.001580653 | GNAL       |
| ENSG00000187189 | 1155.568818 | 633.2588442 | 0.867287395  | 0.000418414 | 0.001580978 | TSPYL4     |
| ENSG00000186197 | 11.62565163 | 0           | 5.871859965  | 0.000418914 | 0.00158264  | EDARADD    |
| ENSG00000125686 | 569.4711362 | 1041.696712 | -0.871228623 | 0.000419144 | 0.001583278 | MED1       |
| ENSG00000142002 | 1152.735776 | 2206.025034 | -0.936235362 | 0.000419806 | 0.001585546 | DPP9       |
| ENSG00000268903 | 21.21567021 | 1.060160428 | 4.310163304  | 0.000420574 | 0.001588023 | AL627309.6 |
| ENSG00000125445 | 530.3346381 | 1182.189086 | -1.156805594 | 0.000420584 | 0.001588023 | MRPS7      |
| ENSG00000274253 | 21.15717564 | 0.356539013 | 5.774214149  | 0.000420656 | 0.001588066 | AC138649.1 |
| ENSG00000260296 | 27.70765543 | 4.758889366 | 2.55623423   | 0.000421491 | 0.001590985 | AC095057.3 |
| ENSG00000136874 | 713.4619359 | 430.5068985 | 0.728768176  | 0.00042191  | 0.001592336 | STX17      |

|                 |             |             |              |             |             |            |
|-----------------|-------------|-------------|--------------|-------------|-------------|------------|
| ENSG00000133169 | 163.1073548 | 1814.258879 | -3.475402056 | 0.000422215 | 0.001593256 | BEX1       |
| ENSG00000108448 | 89.34635637 | 331.0258098 | -1.888352664 | 0.000423533 | 0.001597997 | TRIM16L    |
| ENSG00000283602 | 19.03475539 | 0.774441189 | 4.700359108  | 0.00042385  | 0.001598961 | AC116353.5 |
| ENSG00000233535 | 10.66408556 | 0           | 5.747629044  | 0.000424321 | 0.001600263 | AC003035.2 |
| ENSG00000205784 | 13.29566002 | 0.336469917 | 5.10517112   | 0.000424335 | 0.001600263 | ARRDC5     |
| ENSG00000228903 | 66.401685   | 11.44699363 | 2.525143865  | 0.000424425 | 0.001600263 | RASA4CP    |
| ENSG00000254545 | 0           | 16.52673175 | -6.625203777 | 0.000424441 | 0.001600263 | AL354919.2 |
| ENSG00000286481 | 24.60514912 | 3.291439249 | 2.917576449  | 0.000424764 | 0.001601245 | AC011246.1 |
| ENSG00000136982 | 90.87803542 | 274.4294477 | -1.594597237 | 0.000424946 | 0.001601701 | DSCC1      |
| ENSG00000014216 | 2001.747963 | 3603.974118 | -0.848248571 | 0.000426069 | 0.001605702 | CAPN1      |
| ENSG00000181524 | 203.0049336 | 356.5615886 | -0.813409143 | 0.000426217 | 0.001606024 | RPL24P4    |
| ENSG00000111196 | 223.0161566 | 452.6216583 | -1.021795996 | 0.000426696 | 0.001607596 | MAGOHB     |
| ENSG00000084207 | 5385.197243 | 9635.756667 | -0.83941882  | 0.000426853 | 0.001607955 | GSTP1      |
| ENSG00000149809 | 182.7668421 | 76.33659351 | 1.25618849   | 0.000428293 | 0.001613147 | TM7SF2     |
| ENSG00000267056 | 15.15310388 | 0           | 6.256516622  | 0.000428553 | 0.001613889 | AC005336.1 |
| ENSG00000152208 | 13.22517061 | 0           | 6.059562066  | 0.00043045  | 0.0016208   | GRID2      |
| ENSG00000082014 | 1155.996189 | 545.7692089 | 1.082426006  | 0.000430762 | 0.001621646 | SMARCD3    |
| ENSG00000125991 | 2199.257376 | 3894.256836 | -0.824343066 | 0.000430799 | 0.001621646 | ERGIC3     |
| ENSG00000166845 | 139.0753676 | 319.2932847 | -1.19888919  | 0.000431884 | 0.001625295 | C18orf54   |
| ENSG00000186818 | 14.65014663 | 0           | 6.20602658   | 0.000431894 | 0.001625295 | LILRB4     |
| ENSG00000178297 | 21.14922647 | 60.42229034 | -1.515764132 | 0.000431992 | 0.001625338 | TMPRSS9    |
| ENSG00000099769 | 23.11372936 | 3.189937893 | 2.848817598  | 0.000432031 | 0.001625338 | IGFALS     |
| ENSG00000048707 | 2191.287873 | 957.6030392 | 1.194427813  | 0.000432786 | 0.001627943 | VPS13D     |
| ENSG00000155876 | 1572.434422 | 2572.762401 | -0.71029229  | 0.000434123 | 0.001632738 | RRAGA      |
| ENSG00000158481 | 20.2280619  | 0           | 6.67153396   | 0.000434319 | 0.001633308 | CD1C       |
| ENSG00000100519 | 1037.656396 | 1619.683349 | -0.64251908  | 0.00043434  | 0.001633308 | PSMC6      |
| ENSG00000224861 | 96.92501633 | 194.6549766 | -1.00594353  | 0.000435692 | 0.001637927 | YBX1P1     |
| novel.225       | 14.31274299 | 0.387220594 | 5.210320698  | 0.000436177 | 0.001639512 | -          |
| ENSG00000124688 | 229.4414843 | 407.3553994 | -0.828385839 | 0.000436285 | 0.001639681 | MAD2L1BP   |
| ENSG00000116996 | 0           | 137.050708  | -9.679561345 | 0.000437361 | 0.001643489 | ZP4        |
| ENSG00000007392 | 1856.776626 | 1029.613814 | 0.850932302  | 0.000438244 | 0.001646566 | LUC7L      |
| ENSG00000113013 | 2900.105809 | 5296.897    | -0.869110926 | 0.000438421 | 0.001646996 | HSPA9      |
| ENSG00000054116 | 961.9885628 | 1556.311647 | -0.693961128 | 0.000438741 | 0.001647959 | TRAPPC3    |
| ENSG00000253541 | 28.02066992 | 1.069617038 | 4.705709367  | 0.000440356 | 0.001653703 | SEPT10P1   |
| ENSG00000205426 | 4.27672335  | 33.17803485 | -2.963200762 | 0.000440398 | 0.001653703 | KRT81      |
| ENSG00000197472 | 0.601596751 | 14.52237754 | -4.588989569 | 0.000440497 | 0.001653836 | ZNF695     |
| ENSG00000227456 | 22.18525671 | 1.396630344 | 3.965932125  | 0.00044086  | 0.00165496  | LINC00310  |
| novel.79        | 11.23169125 | 0           | 5.8229486    | 0.000443326 | 0.001663977 | -          |
| ENSG00000088854 | 1448.715326 | 751.380377  | 0.947566825  | 0.000444008 | 0.001666295 | C20orf194  |
| ENSG00000198168 | 982.1753643 | 200.6174295 | 2.290766753  | 0.000444385 | 0.001667469 | SVIP       |
| ENSG00000133805 | 276.9993531 | 1357.559634 | -2.292988454 | 0.000445193 | 0.001670261 | AMPD3      |
| ENSG00000105875 | 520.1326684 | 231.5924613 | 1.166729746  | 0.000445427 | 0.001670898 | WDR91      |
| ENSG00000203883 | 232.3754593 | 31.36247485 | 2.885154885  | 0.000446095 | 0.001673161 | SOX18      |
| ENSG00000270412 | 13.59649403 | 0.336469917 | 5.137445342  | 0.000446604 | 0.001674829 | AL136084.3 |
| ENSG00000135164 | 2449.252016 | 1110.291672 | 1.141598413  | 0.000447643 | 0.001678483 | DMTF1      |
| ENSG00000125450 | 639.9695322 | 1097.469231 | -0.778216081 | 0.000448284 | 0.001680643 | NUP85      |
| ENSG00000181800 | 14.48757069 | 0.356539013 | 5.229129862  | 0.000448437 | 0.001680976 | CEL2F2-AS1 |
| ENSG00000151532 | 252.0277964 | 407.1795635 | -0.691898347 | 0.000449075 | 0.001683123 | VTI1A      |
| ENSG00000048028 | 262.6491866 | 490.5905699 | -0.900941908 | 0.000450738 | 0.00168895  | USP28      |
| ENSG00000116161 | 1010.386707 | 1796.326468 | -0.830279873 | 0.000450759 | 0.00168895  | CACYBP     |
| ENSG00000112796 | 46.92826445 | 3.444975551 | 3.74801584   | 0.000452738 | 0.00169612  | ENPP5      |



|                 |             |             |              |             |             |            |
|-----------------|-------------|-------------|--------------|-------------|-------------|------------|
| ENSG00000119559 | 427.8618372 | 735.4568056 | -0.781522235 | 0.000453024 | 0.001696947 | C19orf25   |
| ENSG00000250133 | 0.293240848 | 18.55654892 | -5.835392549 | 0.000453387 | 0.001698061 | HOXC-AS2   |
| ENSG00000232593 | 468.7523124 | 160.1888293 | 1.549880045  | 0.000455165 | 0.001704475 | KANTR      |
| ENSG00000260473 | 16.12351675 | 0.387220594 | 5.384574813  | 0.00045636  | 0.001708702 | AC068987.3 |
| ENSG00000160285 | 81.80722843 | 216.8967223 | -1.406538772 | 0.000457121 | 0.001711253 | LSS        |
| ENSG00000285533 | 68.88135345 | 20.83832163 | 1.731647819  | 0.000457173 | 0.001711253 | RELA-DT    |
| ENSG00000275016 | 9.985588607 | 0           | 5.653659883  | 0.000457797 | 0.001713341 | AC015574.1 |
| ENSG00000160199 | 275.902906  | 490.0508877 | -0.828247541 | 0.000458032 | 0.001713975 | PKNOX1     |
| ENSG00000167657 | 1124.435885 | 1936.438866 | -0.784039915 | 0.000458957 | 0.001717179 | DAPK3      |
| ENSG00000216901 | 9.67096446  | 0           | 5.607667608  | 0.000459218 | 0.001717917 | ZNF603P    |
| ENSG00000183560 | 15.57123958 | 0           | 6.294030771  | 0.000460957 | 0.001724176 | IZUMO1R    |
| ENSG00000105723 | 772.4012503 | 1260.436877 | -0.706262813 | 0.00046138  | 0.001725511 | GSK3A      |
| ENSG00000258086 | 0.307102255 | 16.33215817 | -5.6479781   | 0.000461727 | 0.00172656  | AC079313.1 |
| novel.600       | 0           | 11.58606464 | -6.111070036 | 0.000461832 | 0.001726703 | -          |
| ENSG00000111696 | 500.6724106 | 185.7770629 | 1.42890162   | 0.000462433 | 0.001728598 | NT5DC3     |
| ENSG00000172053 | 1858.848285 | 3024.632478 | -0.702323525 | 0.000462472 | 0.001728598 | QARS       |
| ENSG00000253658 | 0           | 8.916942943 | -5.738861425 | 0.000462904 | 0.001729798 | LINC01592  |
| ENSG00000176102 | 474.5225192 | 787.44882   | -0.730554978 | 0.000462926 | 0.001729798 | CSTF3      |
| ENSG00000119682 | 756.7197598 | 1175.37329  | -0.635249299 | 0.000463333 | 0.001731068 | AREL1      |
| ENSG00000261526 | 53.27214805 | 19.84196451 | 1.427924596  | 0.000464234 | 0.001734186 | AC012615.1 |
| novel.822       | 12.29125609 | 55.31850193 | -2.167336906 | 0.000464693 | 0.001735649 | -          |
| ENSG00000141568 | 722.8290608 | 1230.692143 | -0.76762577  | 0.00046485  | 0.001735987 | FOXK2      |
| ENSG00000184277 | 863.7387925 | 515.7920628 | 0.74355925   | 0.000465337 | 0.001737557 | TM2D3      |
| ENSG00000150045 | 18.65744846 | 0.743759607 | 4.685202281  | 0.000465759 | 0.001738882 | KLRF1      |
| ENSG00000033627 | 1136.762699 | 694.6852794 | 0.710857397  | 0.000467077 | 0.001743552 | ATP6V0A1   |
| ENSG00000198225 | 121.3224578 | 290.2240001 | -1.257235041 | 0.000467591 | 0.001745221 | FKBP1C     |
| ENSG00000261126 | 41.16650431 | 4.545274171 | 3.166888435  | 0.000467875 | 0.001745877 | RBFADN     |
| ENSG00000214290 | 30.48328549 | 0.387220594 | 6.301360474  | 0.000467901 | 0.001745877 | COLCA2     |
| ENSG00000285886 | 19.68678318 | 1.702418679 | 3.484448643  | 0.000468534 | 0.001747921 | AC211476.6 |
| ENSG00000169249 | 529.8984535 | 224.6788794 | 1.238810837  | 0.000468626 | 0.001747921 | ZRSR2      |
| ENSG00000272040 | 48.56392579 | 15.23661144 | 1.664977668  | 0.000468651 | 0.001747921 | AC010245.2 |
| ENSG00000162924 | 132.4268178 | 43.35693787 | 1.610410131  | 0.000470828 | 0.00175579  | REL        |
| ENSG00000267201 | 0           | 10.50724778 | -5.97771281  | 0.000473397 | 0.001765115 | LINC01775  |
| ENSG00000060138 | 2968.442024 | 4688.790226 | -0.659555397 | 0.000474013 | 0.001767159 | YBX3       |
| ENSG00000236841 | 3.694002601 | 30.34908389 | -3.046557613 | 0.000474328 | 0.001768079 | AC007750.1 |
| novel.46        | 79.15994161 | 6.533412089 | 3.58682761   | 0.000474688 | 0.001769168 | -          |
| ENSG00000156026 | 260.5786207 | 592.4406904 | -1.185475632 | 0.000477352 | 0.001778842 | MCU        |
| ENSG00000273855 | 15.28817047 | 0.336469917 | 5.305087115  | 0.000477746 | 0.001780044 | AC020658.5 |
| ENSG00000011451 | 1016.530962 | 1603.009199 | -0.65713142  | 0.000477812 | 0.001780044 | WIZ        |
| ENSG00000164219 | 558.2744762 | 334.0984278 | 0.740202878  | 0.000477916 | 0.001780177 | PGGT1B     |
| ENSG00000177556 | 596.9770244 | 1153.537199 | -0.950134811 | 0.000478906 | 0.00178361  | ATOX1      |
| ENSG00000169193 | 182.5453443 | 88.0442286  | 1.050041633  | 0.0004801   | 0.001787801 | CCDC126    |
| ENSG00000261644 | 21.70289949 | 1.844058227 | 3.57960964   | 0.000481238 | 0.001791782 | AC007728.2 |
| ENSG00000182836 | 26.18761487 | 0           | 7.044100195  | 0.000481757 | 0.001793455 | PLCXD3     |
| ENSG00000137825 | 6.34327069  | 32.11872633 | -2.335861683 | 0.000482273 | 0.001795118 | ITPKA      |
| ENSG00000231663 | 41.40737629 | 12.39260008 | 1.732596899  | 0.000483017 | 0.00179763  | COA6-AS1   |
| ENSG00000119280 | 5349.736182 | 1851.464891 | 1.530665616  | 0.000483339 | 0.001798574 | C1orf198   |
| ENSG00000121578 | 327.97941   | 697.2330528 | -1.088498999 | 0.000483586 | 0.001799234 | B4GALT4    |
| ENSG00000196421 | 30.52186422 | 6.696276607 | 2.176666873  | 0.000483814 | 0.001799824 | C20orf204  |
| ENSG00000119655 | 3767.558844 | 1975.548278 | 0.931256738  | 0.000484199 | 0.001800998 | NPC2       |
| ENSG00000106245 | 501.4080052 | 826.9168689 | -0.722108026 | 0.000484492 | 0.001801829 | BUD31      |

|                 |             |             |              |             |             |                 |
|-----------------|-------------|-------------|--------------|-------------|-------------|-----------------|
| ENSG00000258636 | 124.8905257 | 33.39763903 | 1.898670348  | 0.000484993 | 0.001803435 | AL121821.1      |
| ENSG00000112096 | 2093.867101 | 9899.243702 | -2.241129686 | 0.000485096 | 0.001803562 | SOD2            |
| ENSG00000225259 | 46.36893611 | 111.8492879 | -1.270759453 | 0.000485526 | 0.001804782 | ST13P6          |
| ENSG00000101624 | 89.87462823 | 181.3679872 | -1.014093366 | 0.000485587 | 0.001804782 | CEP76           |
| ENSG00000243927 | 1315.851776 | 477.6159917 | 1.46163315   | 0.000485633 | 0.001804782 | MRPS6           |
| ENSG00000130706 | 1056.784934 | 1794.779701 | -0.764183335 | 0.000486068 | 0.001806139 | ADRM1           |
| ENSG00000166579 | 815.6347451 | 1596.946212 | -0.969098895 | 0.000486607 | 0.001807727 | NDEL1           |
| ENSG00000125249 | 2259.379188 | 977.5741554 | 1.208342364  | 0.000486634 | 0.001807727 | RAP2A           |
| ENSG00000198208 | 203.2942434 | 41.16956884 | 2.299716573  | 0.000486876 | 0.001808366 | RPS6KL1         |
| ENSG00000254876 | 41.33180101 | 10.94521905 | 1.908230518  | 0.000487388 | 0.001810011 | SUGT1P4-STRA6LP |
| ENSG00000286724 | 47.99352806 | 13.77977381 | 1.792848781  | 0.000488117 | 0.001812459 | AL732509.1      |
| ENSG00000083544 | 485.2158663 | 243.6599746 | 0.993366745  | 0.00048911  | 0.001815886 | TDRD3           |
| novel.684       | 0           | 106.7399426 | -9.31923398  | 0.000489726 | 0.001817913 | -               |
| ENSG00000173511 | 1793.845688 | 935.0221876 | 0.940243104  | 0.000490607 | 0.001820924 | VEGFB           |
| ENSG00000172748 | 202.5488042 | 69.09609238 | 1.549938463  | 0.000491007 | 0.001822031 | ZNF596          |
| ENSG00000287978 | 42.87497672 | 3.434234671 | 3.672175805  | 0.000491046 | 0.001822031 | AC245407.2      |
| novel.470       | 6.009699269 | 36.79507474 | -2.611135904 | 0.000491349 | 0.001822896 | -               |
| ENSG00000273521 | 4.189793959 | 38.44309954 | -3.191125015 | 0.000492566 | 0.001827151 | AL162274.1      |
| ENSG00000143452 | 25.09280568 | 1.110911105 | 4.523633768  | 0.000493202 | 0.001829246 | HORMAD1         |
| ENSG00000172667 | 2608.09011  | 1111.645681 | 1.230057737  | 0.000493395 | 0.001829704 | ZMAT3           |
| ENSG00000169067 | 0           | 12.06918279 | -6.178396074 | 0.000493481 | 0.00182976  | ACTBL2          |
| ENSG00000226465 | 24.5134186  | 4.33153058  | 2.505337915  | 0.000493756 | 0.001830422 | AL390198.1      |
| ENSG00000260877 | 0.925067711 | 22.63150078 | -4.624726654 | 0.0004938   | 0.001830422 | AP005233.2      |
| ENSG00000106546 | 5763.115768 | 1822.709231 | 1.660865945  | 0.000494109 | 0.001831305 | AHR             |
| ENSG00000266053 | 65.13942712 | 21.24676719 | 1.624841189  | 0.000494409 | 0.001831968 | NDUFV2-AS1      |
| ENSG00000225031 | 57.77581071 | 203.1263239 | -1.814414689 | 0.000494429 | 0.001831968 | EIF4BP7         |
| ENSG00000133142 | 2963.115487 | 1628.002924 | 0.863975848  | 0.000494577 | 0.001832256 | TCEAL4          |
| ENSG00000140718 | 719.8445241 | 1194.254284 | -0.73023439  | 0.000495381 | 0.001834972 | FTO             |
| ENSG00000100478 | 211.6608242 | 97.97070969 | 1.109263304  | 0.000495974 | 0.001836908 | AP4S1           |
| ENSG00000221953 | 30.82144458 | 5.422372589 | 2.512214368  | 0.000496339 | 0.001837998 | C1orf229        |
| ENSG00000182512 | 572.1004012 | 1254.170715 | -1.132647683 | 0.000497081 | 0.001840482 | GLRX5           |
| ENSG00000129951 | 3.053328925 | 30.48969596 | -3.324573522 | 0.000497797 | 0.00184287  | PLPPR3          |
| ENSG00000260838 | 15.20729586 | 0           | 6.261385573  | 0.000498298 | 0.001844311 | AC022893.2      |
| ENSG00000159714 | 406.931387  | 221.244178  | 0.879091217  | 0.000498328 | 0.001844311 | ZDHHC1          |
| ENSG00000211897 | 85.28746791 | 0           | 8.747882132  | 0.000499167 | 0.001847153 | IGHG3           |
| ENSG00000217801 | 6.696971762 | 50.82572943 | -2.923106042 | 0.000499378 | 0.001847671 | AL390719.1      |
| ENSG00000259642 | 45.08404127 | 116.5396221 | -1.37098209  | 0.00050011  | 0.001850114 | ST20-AS1        |
| ENSG00000250490 | 19.46507193 | 0.774441189 | 4.731455878  | 0.000500549 | 0.001851476 | LINC02145       |
| ENSG00000117152 | 145.3903294 | 1117.012777 | -2.941963306 | 0.00050131  | 0.001854026 | RGS4            |
| ENSG00000126895 | 13.3712353  | 0.387220594 | 5.112391749  | 0.000502686 | 0.001858851 | AVPR2           |
| ENSG00000186481 | 38.06102033 | 1.00940975  | 5.190765493  | 0.00050466  | 0.001865884 | ANKRD20A5P      |
| ENSG00000115806 | 1214.198949 | 2035.461225 | -0.745382534 | 0.000508544 | 0.001879977 | GORASP2         |
| ENSG00000116031 | 9.409207373 | 0           | 5.567425889  | 0.000508696 | 0.001880274 | CD207           |
| ENSG00000099139 | 356.3522154 | 156.9231913 | 1.185070948  | 0.000509194 | 0.001881846 | PCSK5           |
| ENSG00000088812 | 1110.574839 | 2091.667981 | -0.91330225  | 0.000509482 | 0.001882641 | ATRNL           |
| ENSG00000105708 | 146.9940807 | 74.36248852 | 0.981561402  | 0.000511064 | 0.001888218 | ZNF14           |
| ENSG00000097007 | 2123.606709 | 4206.265829 | -0.985993663 | 0.00051289  | 0.001894695 | ABL1            |
| ENSG00000206559 | 47.94846763 | 16.52930029 | 1.536576801  | 0.000513138 | 0.001895344 | ZCWPW2          |
| ENSG00000003393 | 1385.670681 | 698.2982091 | 0.988628435  | 0.000513755 | 0.001897351 | ALS2            |
| ENSG00000146909 | 433.5125795 | 763.5508165 | -0.81679927  | 0.000514271 | 0.001898988 | NOM1            |
| ENSG00000197083 | 586.5031738 | 52.07837411 | 3.491510737  | 0.000515078 | 0.001901698 | ZNF300P1        |

|                 |             |             |              |             |             |            |
|-----------------|-------------|-------------|--------------|-------------|-------------|------------|
| ENSG00000143742 | 2469.823339 | 4217.293833 | -0.771964318 | 0.000515927 | 0.001904562 | SRP9       |
| ENSG00000156253 | 224.1564104 | 495.7147914 | -1.145712205 | 0.000516275 | 0.001905575 | RWDD2B     |
| ENSG00000206077 | 12.73564749 | 0.356539013 | 5.042461485  | 0.000517401 | 0.001909458 | ZDHHC11B   |
| ENSG00000182983 | 285.029701  | 81.66948989 | 1.801139794  | 0.000518128 | 0.001911869 | ZNF662     |
| novel.84        | 9.392838668 | 0           | 5.565181875  | 0.000518483 | 0.001912567 | -          |
| ENSG00000154127 | 188.7197709 | 390.6197568 | -1.050246172 | 0.000518517 | 0.001912567 | UBASH3B    |
| ENSG00000092108 | 903.5277734 | 1387.22739  | -0.618419803 | 0.000518537 | 0.001912567 | SCFD1      |
| ENSG00000166311 | 1080.37824  | 1993.912633 | -0.884216455 | 0.000518843 | 0.001913421 | SMPD1      |
| ENSG00000269220 | 15.90996814 | 0.356539013 | 5.362671479  | 0.000520203 | 0.001918133 | LINC00528  |
| ENSG00000256612 | 9.410461022 | 0           | 5.567599849  | 0.000520268 | 0.001918133 | CYP2B7P    |
| ENSG00000187151 | 38.10539623 | 2.873537073 | 3.728523567  | 0.000520348 | 0.001918154 | ANGPTL5    |
| ENSG00000044524 | 1092.986008 | 27.87620523 | 5.291650158  | 0.000521085 | 0.001920602 | EPHA3      |
| ENSG00000105819 | 879.2283586 | 1354.031821 | -0.623036985 | 0.000521952 | 0.001923522 | PMPCB      |
| ENSG00000101474 | 1836.357062 | 3484.17413  | -0.924085279 | 0.000522447 | 0.001925073 | APMAP      |
| novel.1073      | 311.4769491 | 133.9161568 | 1.215775182  | 0.000524228 | 0.001931204 | -          |
| ENSG00000166446 | 102.9842486 | 260.9692255 | -1.34186487  | 0.000524259 | 0.001931204 | CDYL2      |
| ENSG00000102924 | 11.95643102 | 0           | 5.914678148  | 0.000524971 | 0.001933552 | CBLN1      |
| ENSG00000165300 | 1971.930382 | 279.5121958 | 2.819102346  | 0.000525724 | 0.001936049 | SLITRK5    |
| ENSG00000108576 | 29.13653459 | 1.161661783 | 4.706719573  | 0.000526468 | 0.001938515 | SLC6A4     |
| ENSG00000164638 | 47.85165124 | 215.3265681 | -2.169720155 | 0.000527081 | 0.001940499 | SLC29A4    |
| ENSG00000226413 | 22.52731894 | 0.672939833 | 5.00183293   | 0.000527256 | 0.001940867 | OR8T1P     |
| ENSG00000172878 | 418.6498253 | 165.3102123 | 1.33934026   | 0.000527711 | 0.001942267 | METAP1D    |
| ENSG00000102786 | 485.2896459 | 888.8725232 | -0.872891802 | 0.000531606 | 0.001956324 | INTS6      |
| ENSG00000118523 | 3334.946567 | 24864.72242 | -2.898381203 | 0.000531815 | 0.001956817 | CCN2       |
| ENSG00000154040 | 41.04643806 | 105.7578283 | -1.368134819 | 0.000532042 | 0.001957375 | CABYR      |
| ENSG00000181610 | 526.3186747 | 974.0649921 | -0.888442639 | 0.000533581 | 0.001962759 | MRPS23     |
| ENSG00000164989 | 98.9030959  | 27.99880316 | 1.814343964  | 0.000533856 | 0.001963493 | CCDC171    |
| ENSG00000158526 | 1222.18056  | 757.2345688 | 0.690557258  | 0.000538102 | 0.00197883  | TSR2       |
| ENSG00000092841 | 10244.68098 | 17482.41669 | -0.771044629 | 0.0005394   | 0.00198332  | MYL6       |
| ENSG00000187626 | 212.2607678 | 113.5846528 | 0.903100253  | 0.000539745 | 0.001984308 | ZKSCAN4    |
| ENSG00000160678 | 152.8652643 | 30.84841833 | 2.310413045  | 0.000540517 | 0.001986866 | S100A1     |
| ENSG00000149548 | 34.24358963 | 96.24488268 | -1.493012304 | 0.000540838 | 0.001987766 | CCDC15     |
| ENSG00000260259 | 0.908699006 | 13.38065646 | -3.878696443 | 0.000541136 | 0.001988579 | LINC02166  |
| novel.788       | 150.780213  | 381.7562278 | -1.340185332 | 0.000542141 | 0.001991991 | -          |
| ENSG00000128654 | 377.6723502 | 745.5347337 | -0.981568692 | 0.000543174 | 0.001995504 | MTX2       |
| ENSG00000205362 | 31.12353224 | 77.38802084 | -1.311784814 | 0.000543434 | 0.001996094 | MT1A       |
| ENSG00000279631 | 75.65110846 | 9.998456736 | 2.908113113  | 0.000543488 | 0.001996094 | AL158211.5 |
| ENSG00000134759 | 1134.387468 | 1736.124236 | -0.613837033 | 0.000543805 | 0.001996975 | ELP2       |
| ENSG00000197857 | 282.5213683 | 132.7920646 | 1.087648793  | 0.000544575 | 0.001999352 | ZNF44      |
| ENSG00000261416 | 9.9717272   | 0           | 5.651837176  | 0.000544606 | 0.001999352 | AC012645.3 |
| ENSG00000105576 | 1697.737273 | 2595.806571 | -0.612511369 | 0.000545826 | 0.00200345  | TNPO2      |
| ENSG00000115155 | 14.00313344 | 0.356539013 | 5.178852452  | 0.000545877 | 0.00200345  | OTOF       |
| ENSG00000135951 | 97.46733558 | 26.72014725 | 1.865225152  | 0.000546496 | 0.002005441 | TSGA10     |
| ENSG00000163040 | 122.3403241 | 308.7765675 | -1.335761175 | 0.000546876 | 0.00200655  | CCDC74A    |
| ENSG00000160710 | 3923.122204 | 6462.005275 | -0.719989467 | 0.000547675 | 0.0020092   | ADAR       |
| ENSG00000100968 | 22.50231689 | 71.95953087 | -1.676704745 | 0.0005489   | 0.002013408 | NFATC4     |
| ENSG00000135052 | 1225.372355 | 3661.03091  | -1.579126292 | 0.000549169 | 0.002013914 | GOLM1      |
| ENSG00000285094 | 14.95306066 | 0.356539013 | 5.275815354  | 0.000549193 | 0.002013914 | LINC01488  |
| ENSG00000132676 | 1177.118657 | 1877.957828 | -0.674001551 | 0.000549383 | 0.002014328 | DAP3       |
| ENSG00000226622 | 27.25735143 | 1.456837632 | 4.235293407  | 0.000551277 | 0.002020952 | AC092155.1 |
| ENSG00000077327 | 18.00359756 | 0           | 6.505115337  | 0.000551355 | 0.002020952 | SPAG6      |

|                 |             |             |              |             |             |             |
|-----------------|-------------|-------------|--------------|-------------|-------------|-------------|
| ENSG00000008130 | 758.2954862 | 1369.799685 | -0.853266415 | 0.000551423 | 0.002020952 | NADK        |
| ENSG00000277156 | 28.32354051 | 0.336469917 | 6.195301838  | 0.000553117 | 0.002026873 | AL589743.5  |
| ENSG00000023902 | 2518.366098 | 1281.729583 | 0.974661286  | 0.000555282 | 0.002034509 | PLEKH01     |
| novel.627       | 16.05832667 | 1.467450118 | 3.473917272  | 0.000555357 | 0.002034509 | -           |
| ENSG00000136167 | 1546.487758 | 204.8211997 | 2.917155035  | 0.000555491 | 0.002034711 | LCP1        |
| ENSG00000134440 | 1891.55146  | 3243.749458 | -0.77820998  | 0.000555706 | 0.002035212 | NARS        |
| ENSG00000130640 | 1213.974007 | 2137.498843 | -0.816052499 | 0.000555925 | 0.002035728 | TUBGCP2     |
| ENSG00000158711 | 1321.028681 | 808.8667393 | 0.707863275  | 0.00055616  | 0.002036301 | ELK4        |
| ENSG00000172244 | 36.83232623 | 105.5737388 | -1.520007214 | 0.000556446 | 0.002037062 | C5orf34     |
| ENSG00000140854 | 424.6519867 | 808.4632218 | -0.928617459 | 0.000557995 | 0.002042388 | KATNB1      |
| ENSG00000069998 | 477.2855262 | 1022.273948 | -1.098803045 | 0.000558058 | 0.002042388 | HDHD5       |
| ENSG00000187243 | 54.63917115 | 155.5062823 | -1.508257852 | 0.000558551 | 0.002043905 | MAGED4B     |
| ENSG00000274286 | 10.04479518 | 0           | 5.661412299  | 0.000559692 | 0.002047644 | ADRA2B      |
| ENSG00000069399 | 381.4586684 | 762.3005995 | -0.998388178 | 0.000559731 | 0.002047644 | BCL3        |
| ENSG00000197713 | 531.5420911 | 1062.654541 | -0.999703462 | 0.000559875 | 0.002047883 | RPE         |
| ENSG00000125170 | 433.1971999 | 774.8020466 | -0.839149584 | 0.000560001 | 0.002048056 | DOK4        |
| ENSG00000145833 | 1009.802977 | 1756.250622 | -0.798322051 | 0.00056086  | 0.00205091  | DDX46       |
| ENSG00000177096 | 66.58446152 | 159.0352583 | -1.258104093 | 0.00056165  | 0.002053508 | PHETA2      |
| novel.970       | 64.60356244 | 1.793307549 | 5.170483167  | 0.000562243 | 0.002055388 | -           |
| ENSG00000169740 | 528.7540817 | 302.5824638 | 0.8051828    | 0.000562462 | 0.002055611 | ZNF32       |
| ENSG00000141401 | 149.1867057 | 298.808724  | -1.002979605 | 0.000562463 | 0.002055611 | IMPA2       |
| ENSG00000132424 | 5336.49027  | 2501.582126 | 1.093151845  | 0.00056262  | 0.002055897 | PNISR       |
| ENSG00000188610 | 50.25496148 | 129.9396241 | -1.370095203 | 0.000563309 | 0.002058126 | FAM72B      |
| ENSG00000109929 | 938.7256781 | 421.2701811 | 1.155388313  | 0.000565682 | 0.002066505 | SC5D        |
| ENSG00000268089 | 48.29916321 | 7.673720506 | 2.66229564   | 0.000567027 | 0.002071127 | GABRQ       |
| ENSG00000224699 | 40.08953058 | 11.87191227 | 1.757937625  | 0.000569031 | 0.00207814  | LAMTOR5-AS1 |
| ENSG00000156463 | 3.691495303 | 54.78882424 | -3.895445057 | 0.000569107 | 0.00207814  | SH3RF2      |
| ENSG00000215244 | 36.10765773 | 8.029103644 | 2.177942114  | 0.000570011 | 0.002081149 | LINC02649   |
| ENSG00000135316 | 2553.058855 | 4272.390053 | -0.74285604  | 0.000570453 | 0.002082469 | SYNCRIP     |
| ENSG00000249274 | 18.8886907  | 0.713078025 | 4.720601761  | 0.00057109  | 0.002084425 | PDLIM1P4    |
| ENSG00000277363 | 10.92827867 | 0           | 5.783436007  | 0.000571149 | 0.002084425 | SRCIN1      |
| ENSG00000183615 | 67.59785446 | 12.45511911 | 2.437138248  | 0.000571867 | 0.002086752 | FAM167B     |
| ENSG00000099251 | 95.76860763 | 20.93280651 | 2.195777048  | 0.000572238 | 0.002087812 | HSD17B7P2   |
| ENSG00000168765 | 447.4102632 | 204.4301044 | 1.128582509  | 0.000572658 | 0.002089053 | GSTM4       |
| ENSG00000183474 | 12.57941107 | 54.29120644 | -2.105627659 | 0.000573352 | 0.002091291 | GTF2H2C     |
| ENSG00000285887 | 22.46832583 | 2.772035718 | 2.99072282   | 0.000573963 | 0.002093225 | AL009176.1  |
| ENSG00000205629 | 416.333757  | 704.0763978 | -0.757669152 | 0.00057471  | 0.002095654 | LCMT1       |
| ENSG00000139737 | 53.44922614 | 4.606637334 | 3.530882667  | 0.000574809 | 0.00209572  | SLAIN1      |
| ENSG00000078902 | 1857.111874 | 1112.883275 | 0.738982191  | 0.000574927 | 0.002095859 | TOLLIP      |
| ENSG00000088826 | 661.8712773 | 1243.734861 | -0.910316428 | 0.000575124 | 0.002096281 | SMOX        |
| ENSG00000130813 | 941.8204351 | 581.1765835 | 0.696695984  | 0.000576825 | 0.002102185 | C19orf66    |
| ENSG00000125409 | 29.14516794 | 2.0188195   | 3.808226142  | 0.000577201 | 0.002103262 | TEKT3       |
| ENSG00000142192 | 26515.60827 | 14942.0468  | 0.827487796  | 0.00057988  | 0.002112727 | APP         |
| ENSG00000171150 | 606.380818  | 1060.836271 | -0.807068808 | 0.000580079 | 0.002113155 | SOCS5       |
| ENSG00000261150 | 19.94721535 | 1.386017859 | 3.815782584  | 0.000580202 | 0.002113308 | EPPK1       |
| ENSG00000221883 | 48.22623742 | 14.90014152 | 1.689281968  | 0.000580687 | 0.002114777 | ARIH2OS     |
| ENSG00000166573 | 19.65698034 | 0           | 6.630151834  | 0.000581515 | 0.002117497 | GALR1       |
| ENSG00000104381 | 336.0093157 | 105.3745889 | 1.670860995  | 0.00058261  | 0.002121189 | GDAP1       |
| ENSG00000196428 | 791.5053551 | 451.8105809 | 0.808695573  | 0.00058307  | 0.002122565 | TSC22D2     |
| ENSG00000156795 | 93.632852   | 193.823877  | -1.050223824 | 0.000583224 | 0.002122828 | WDYHV1      |
| ENSG00000185133 | 65.00246614 | 11.89313725 | 2.452736442  | 0.000583405 | 0.002123188 | INPP5J      |

|                 |             |             |              |             |             |            |
|-----------------|-------------|-------------|--------------|-------------|-------------|------------|
| ENSG00000147614 | 0           | 13.17508521 | -6.297047594 | 0.000584942 | 0.002128483 | ATP6V0D2   |
| ENSG00000213442 | 1256.046628 | 2472.677574 | -0.977199709 | 0.000587021 | 0.002135736 | RPL18AP3   |
| ENSG00000167925 | 748.2749807 | 133.2653066 | 2.487957194  | 0.000587099 | 0.002135736 | GHDC       |
| ENSG00000172409 | 162.4236573 | 328.7382703 | -1.017672402 | 0.000589189 | 0.002143038 | CLP1       |
| ENSG00000065154 | 1505.015382 | 2819.757719 | -0.905778545 | 0.000589822 | 0.00214504  | OAT        |
| ENSG00000100221 | 985.5923736 | 1816.542296 | -0.882089847 | 0.000591643 | 0.002151362 | JOSD1      |
| ENSG00000107338 | 144.6297049 | 354.1305051 | -1.291975279 | 0.00059209  | 0.002152684 | SHB        |
| ENSG00000183580 | 721.4879778 | 378.5520682 | 0.930227037  | 0.000593847 | 0.002158474 | FBXL7      |
| ENSG00000197180 | 86.09459388 | 24.54090337 | 1.80384447   | 0.000593848 | 0.002158474 | AC244090.1 |
| ENSG00000235106 | 360.6906089 | 654.3302428 | -0.858930623 | 0.00059438  | 0.002159828 | BRD3OS     |
| ENSG00000138071 | 4765.363346 | 8502.807045 | -0.835386928 | 0.000594387 | 0.002159828 | ACTR2      |
| ENSG00000106268 | 312.9788254 | 575.559265  | -0.879326962 | 0.000595791 | 0.002164627 | NUDT1      |
| ENSG00000069849 | 1942.259144 | 3945.754583 | -1.022628177 | 0.000597431 | 0.00217028  | ATP1B3     |
| ENSG00000231106 | 20.95817261 | 0.387220594 | 5.761198873  | 0.000598002 | 0.002172054 | LINC01436  |
| ENSG00000267532 | 21.16838721 | 0.743759607 | 4.864626041  | 0.00059894  | 0.002175156 | MIR497HG   |
| ENSG00000101665 | 382.4441803 | 862.8359539 | -1.17415437  | 0.00059999  | 0.002178663 | SMAD7      |
| ENSG00000171596 | 21.51080544 | 0.356539013 | 5.798110918  | 0.000600343 | 0.00217964  | NMUR1      |
| ENSG00000075618 | 3338.031962 | 8732.630498 | -1.387440102 | 0.000600741 | 0.002180782 | FSCN1      |
| ENSG00000123892 | 111.5402464 | 23.3646479  | 2.262008463  | 0.000601828 | 0.002184422 | RAB38      |
| ENSG00000148459 | 56.24084142 | 164.4955045 | -1.54831973  | 0.000602942 | 0.002188158 | PDSS1      |
| ENSG00000105376 | 9.861120675 | 738.059796  | -6.226741937 | 0.000603549 | 0.002190058 | ICAM5      |
| ENSG00000096696 | 120.8631919 | 876.9445726 | -2.859475333 | 0.000603701 | 0.002190304 | DSP        |
| ENSG00000121104 | 277.9228542 | 112.3351845 | 1.308581056  | 0.000604736 | 0.002193751 | FAM117A    |
| novel.334       | 21.4887814  | 1.823989131 | 3.573300175  | 0.000605158 | 0.002194974 | -          |
| ENSG00000168887 | 756.2718369 | 425.6765946 | 0.82935856   | 0.000605812 | 0.00219685  | C2orf68    |
| ENSG00000233695 | 303.2051482 | 113.8335259 | 1.415024087  | 0.000605844 | 0.00219685  | GAS6-AS1   |
| ENSG00000102595 | 560.5619956 | 1092.963847 | -0.962931029 | 0.000605983 | 0.002197047 | UGGT2      |
| ENSG00000147044 | 840.0495955 | 432.5070616 | 0.957664943  | 0.000606794 | 0.002199682 | CASK       |
| ENSG00000248932 | 125.8985481 | 48.47442121 | 1.38119463   | 0.000607051 | 0.002200307 | AC046134.2 |
| ENSG00000150636 | 143.6583234 | 22.79017416 | 2.650046278  | 0.00060864  | 0.002205759 | CCDC102B   |
| ENSG00000108395 | 376.0772054 | 622.8690104 | -0.727933362 | 0.000609352 | 0.002208028 | TRIM37     |
| ENSG00000120093 | 114.363899  | 501.4982196 | -2.133001184 | 0.000609892 | 0.00220968  | HOXB3      |
| ENSG00000172216 | 1483.369285 | 4211.448089 | -1.505367016 | 0.000610656 | 0.002212137 | CEBPB      |
| ENSG00000271344 | 37.9269223  | 6.144907225 | 2.630721125  | 0.000611204 | 0.002213816 | AC018638.6 |
| ENSG00000163798 | 519.253215  | 819.4968546 | -0.658581814 | 0.000612018 | 0.002216456 | SLC4A1AP   |
| ENSG00000132394 | 1.509042109 | 20.81696826 | -3.77939124  | 0.000612143 | 0.002216597 | EEFSEC     |
| ENSG00000259104 | 11.50856339 | 0           | 5.858346176  | 0.000612848 | 0.00221884  | PTCSC3     |
| ENSG00000235978 | 18.46589605 | 1.10029862  | 4.089161675  | 0.000614274 | 0.002223693 | AC018816.1 |
| ENSG00000131018 | 1598.234399 | 674.6792939 | 1.244005525  | 0.000614761 | 0.002225147 | SYNE1      |
| ENSG00000273387 | 47.75913779 | 8.680818506 | 2.463442154  | 0.000617763 | 0.002235701 | AC005005.3 |
| ENSG00000152217 | 189.4490107 | 33.65383256 | 2.48993305   | 0.000617997 | 0.002236235 | SETBP1     |
| ENSG00000175283 | 310.2122556 | 581.9636575 | -0.908188767 | 0.000618189 | 0.002236618 | DOLK       |
| ENSG00000162374 | 10.28133675 | 0           | 5.695837032  | 0.000618491 | 0.0022374   | ELAVL4     |
| ENSG00000198242 | 3847.750409 | 7647.04561  | -0.990902521 | 0.000620159 | 0.002243121 | RPL23A     |
| ENSG00000236830 | 49.34139007 | 10.516576   | 2.234567941  | 0.000621016 | 0.00224591  | CBR3-AS1   |
| ENSG00000164669 | 57.00992961 | 3.250145181 | 4.135289155  | 0.000621577 | 0.002247628 | INTS4P1    |
| ENSG00000271755 | 29.97822039 | 5.12488499  | 2.560166825  | 0.00062287  | 0.002251987 | AL031118.1 |
| ENSG00000169955 | 210.4620323 | 97.94349573 | 1.101245082  | 0.000623172 | 0.002252766 | ZNF747     |
| novel.856       | 12.0269917  | 107.8571345 | -3.16239053  | 0.000623296 | 0.002252899 | -          |
| ENSG00000233765 | 10.61992277 | 0           | 5.74218591   | 0.00062468  | 0.002257334 | AL591479.1 |
| ENSG00000154556 | 1471.059761 | 558.9875141 | 1.395503798  | 0.000624696 | 0.002257334 | SORBS2     |

|                 |             |             |              |             |             |            |
|-----------------|-------------|-------------|--------------|-------------|-------------|------------|
| ENSG00000147454 | 1089.423892 | 3625.086178 | -1.734367559 | 0.000626991 | 0.002265292 | SLC25A37   |
| ENSG00000086159 | 12.02817408 | 0           | 5.922691173  | 0.000627073 | 0.002265292 | AQP6       |
| ENSG00000163812 | 467.4592223 | 996.2394324 | -1.092018053 | 0.000627814 | 0.002267655 | ZDHHC3     |
| ENSG00000224431 | 3.945659226 | 37.37335411 | -3.242510433 | 0.000628319 | 0.002269162 | AC063976.2 |
| ENSG00000226784 | 4.909803862 | 34.2780295  | -2.808153929 | 0.000628723 | 0.002270306 | PGAM4      |
| ENSG00000164405 | 1540.724321 | 2707.328967 | -0.813318885 | 0.000629967 | 0.002274483 | UQCRQ      |
| ENSG00000145692 | 13.27302307 | 0.336469917 | 5.102926883  | 0.000630153 | 0.002274837 | BHMT       |
| ENSG00000165802 | 1136.412084 | 2501.657308 | -1.138485397 | 0.000630386 | 0.002275363 | NSMF       |
| ENSG00000104497 | 221.0104259 | 108.8613253 | 1.021155196  | 0.000633498 | 0.002286086 | SNX16      |
| ENSG00000130433 | 0.921306765 | 17.20108424 | -4.235850023 | 0.000633533 | 0.002286086 | CACNG6     |
| ENSG00000226903 | 9.616772479 | 0           | 5.600304377  | 0.000635205 | 0.002291481 | LINC00354  |
| ENSG00000257346 | 9.616772479 | 0           | 5.600304377  | 0.000635205 | 0.002291481 | AC011603.1 |
| ENSG00000185920 | 1005.986837 | 197.0622066 | 2.351965471  | 0.00063638  | 0.002295402 | PTCH1      |
| ENSG00000232104 | 50.94578146 | 7.377517176 | 2.779594722  | 0.000636861 | 0.00229682  | RFX3-AS1   |
| ENSG00000267498 | 15.08658887 | 0.693008929 | 4.40463191   | 0.00063757  | 0.002299058 | AC007786.1 |
| ENSG00000273259 | 10.18563182 | 0           | 5.683493555  | 0.000640424 | 0.002309029 | AL049839.2 |
| ENSG00000230415 | 33.65585429 | 8.76340664  | 1.951812125  | 0.000640784 | 0.002310006 | LINC01786  |
| ENSG00000119411 | 13.79055374 | 0           | 6.118509242  | 0.000641818 | 0.00231341  | BSPRY      |
| ENSG00000220614 | 9.058013599 | 0           | 5.513351539  | 0.000642306 | 0.00231485  | AL583834.1 |
| ENSG00000137504 | 2034.154699 | 1030.992626 | 0.980629799  | 0.000646798 | 0.002330716 | CREBZF     |
| ENSG00000168032 | 3.94189828  | 22.1737172  | -2.493959906 | 0.000647149 | 0.002331656 | ENTPD3     |
| ENSG00000183813 | 15.68213084 | 0           | 6.303931195  | 0.000649629 | 0.002340269 | CCR4       |
| ENSG00000287461 | 12.36933866 | 0.387220594 | 5.001271111  | 0.000649836 | 0.002340691 | AL080317.4 |
| ENSG00000267801 | 9.074382304 | 0           | 5.515676734  | 0.000650426 | 0.002342488 | AC087289.6 |
| ENSG00000074935 | 426.0090953 | 240.98045   | 0.821035953  | 0.000650642 | 0.002342944 | TUBE1      |
| ENSG00000115750 | 193.5714083 | 326.1821615 | -0.752337888 | 0.000650867 | 0.002343428 | TAF1B      |
| ENSG00000047249 | 529.5809212 | 1050.181151 | -0.98792543  | 0.000651898 | 0.002346695 | ATP6V1H    |
| ENSG00000253174 | 0           | 8.6512928   | -5.693427824 | 0.000651955 | 0.002346695 | AC009630.2 |
| ENSG00000161682 | 58.01625577 | 171.6831059 | -1.565991426 | 0.000652436 | 0.0023481   | FAM171A2   |
| ENSG00000268996 | 97.17087508 | 26.65292349 | 1.860772888  | 0.000652871 | 0.002349339 | MAN1B1-DT  |
| ENSG00000140688 | 565.1036946 | 998.250183  | -0.820560778 | 0.000653943 | 0.002352872 | C16orf58   |
| ENSG00000133619 | 691.6584041 | 289.9483795 | 1.254978787  | 0.000654324 | 0.002353916 | KRBA1      |
| ENSG00000070614 | 5502.713997 | 3028.994728 | 0.861404406  | 0.000654659 | 0.002354798 | NDST1      |
| ENSG00000186648 | 9.338646688 | 0           | 5.557669183  | 0.000655225 | 0.002356505 | CARMIL3    |
| ENSG00000151025 | 14.37542578 | 0.356539013 | 5.218836914  | 0.000655738 | 0.002358026 | GPR158     |
| ENSG00000154262 | 899.4884849 | 84.25666543 | 3.415204366  | 0.000656149 | 0.002359176 | ABCA6      |
| ENSG00000134508 | 477.3600049 | 1233.299817 | -1.369174994 | 0.000656474 | 0.002360017 | CABLES1    |
| ENSG00000238072 | 49.09746915 | 105.325204  | -1.100383661 | 0.000656675 | 0.002360413 | AC009244.1 |
| ENSG00000198406 | 30.68938348 | 82.8756094  | -1.435072267 | 0.00065691  | 0.002360931 | BZW1P2     |
| ENSG00000037897 | 111.8330166 | 270.8448876 | -1.27717651  | 0.000658383 | 0.002365899 | METTL1     |
| ENSG00000163520 | 5020.392226 | 455.5436596 | 3.461935418  | 0.000659345 | 0.002369028 | FBLN2      |
| ENSG00000134602 | 61.05063742 | 189.9781959 | -1.638065932 | 0.000659819 | 0.002370402 | STK26      |
| ENSG00000278740 | 9.399106912 | 0           | 5.566054845  | 0.000660403 | 0.002372174 | AC005332.7 |
| novel.760       | 10.05991024 | 0           | 5.663433334  | 0.000661811 | 0.002376901 | -          |
| novel.1115      | 27.60345969 | 3.658590747 | 2.927912264  | 0.000663595 | 0.002382979 | -          |
| ENSG00000241231 | 11.07670847 | 0           | 5.804356538  | 0.00066481  | 0.002387013 | AC068308.1 |
| ENSG00000138131 | 468.7789078 | 268.9394533 | 0.801966468  | 0.000665326 | 0.002388535 | LOXL4      |
| ENSG00000131368 | 702.8565858 | 1104.857138 | -0.652726373 | 0.000666305 | 0.00239172  | MRPS25     |
| ENSG00000108963 | 202.4405194 | 378.3009178 | -0.901241143 | 0.000666424 | 0.002391818 | DPH1       |
| ENSG00000153310 | 1252.069399 | 646.3013613 | 0.953738669  | 0.000666775 | 0.002392748 | FAM49B     |
| ENSG00000160049 | 781.4856187 | 1393.82476  | -0.834999506 | 0.000666906 | 0.002392884 | DFFA       |

|                 |             |             |              |             |             |            |
|-----------------|-------------|-------------|--------------|-------------|-------------|------------|
| ENSG00000155506 | 2776.242034 | 4535.840595 | -0.708206683 | 0.000670668 | 0.002406053 | LARP1      |
| ENSG00000240291 | 51.88367039 | 14.30978983 | 1.857569835  | 0.000672574 | 0.002412555 | AL450384.2 |
| ENSG00000271538 | 22.04037439 | 1.854670712 | 3.597433734  | 0.000674869 | 0.002420456 | LINC02427  |
| ENSG00000133433 | 67.89840409 | 182.1039596 | -1.424281193 | 0.000676087 | 0.00242449  | GSTT2B     |
| ENSG00000165275 | 327.6790905 | 175.3396889 | 0.902271867  | 0.000678162 | 0.002431595 | TRMT10B    |
| ENSG00000105323 | 3440.083439 | 5362.364443 | -0.640419485 | 0.000679418 | 0.002435761 | HNRNPUL1   |
| ENSG00000163689 | 15.21392011 | 61.96847578 | -2.026642047 | 0.000680117 | 0.002437929 | C3orf67    |
| ENSG00000158552 | 563.203342  | 340.5946085 | 0.726010773  | 0.000681545 | 0.002442713 | ZFAND2B    |
| ENSG00000175348 | 1579.152564 | 893.8267953 | 0.820743215  | 0.000683697 | 0.002450085 | TMEM9B     |
| ENSG00000180089 | 49.85752489 | 18.37451439 | 1.442833792  | 0.000684474 | 0.002452535 | TMEM86B    |
| ENSG00000068001 | 790.9481909 | 1375.114838 | -0.797980413 | 0.000684821 | 0.002453437 | HYAL2      |
| ENSG00000116774 | 4784.780221 | 833.5464391 | 2.52094402   | 0.000685463 | 0.0024554   | OLFML3     |
| ENSG00000107140 | 790.8194798 | 476.488933  | 0.730989071  | 0.000685766 | 0.002456147 | TESK1      |
| ENSG00000205403 | 279.8694775 | 26.70624271 | 3.385645599  | 0.000686979 | 0.002460151 | CFI        |
| ENSG00000283667 | 12.36808501 | 0.336469917 | 5.00112856   | 0.0006879   | 0.002462916 | AC009802.1 |
| ENSG00000143878 | 10750.01405 | 4285.764396 | 1.32670327   | 0.000687941 | 0.002462916 | RHOB       |
| ENSG00000272121 | 7.868681504 | 38.69086394 | -2.293929659 | 0.000688568 | 0.002464779 | AC006058.3 |
| ENSG00000115461 | 11848.81809 | 1749.857853 | 2.759465777  | 0.000688746 | 0.002464779 | IGFBP5     |
| ENSG00000177943 | 291.2122463 | 147.6258815 | 0.978723381  | 0.000688835 | 0.002464779 | MAMDC4     |
| ENSG00000284128 | 19.22254685 | 1.365948763 | 3.76941677   | 0.00068884  | 0.002464779 | AP000356.3 |
| ENSG00000179428 | 0           | 9.171852206 | -5.775031146 | 0.000689692 | 0.002467488 | AC073072.1 |
| ENSG00000160209 | 1475.382883 | 3186.076294 | -1.110705566 | 0.000689971 | 0.002468144 | PDXK       |
| ENSG00000226259 | 1.774560141 | 34.86799601 | -4.281941322 | 0.000691545 | 0.002473436 | GTF2H2B    |
| ENSG00000164620 | 41.53936611 | 113.6149492 | -1.448682914 | 0.000691662 | 0.002473514 | RELL2      |
| ENSG00000117016 | 64.1318317  | 12.17641634 | 2.405247834  | 0.000693849 | 0.002480994 | RIMS3      |
| ENSG00000118514 | 57.218278   | 3.81084278  | 3.931125527  | 0.000694085 | 0.002481495 | ALDH8A1    |
| ENSG00000126814 | 297.9466854 | 507.9648872 | -0.769672536 | 0.000695565 | 0.002486445 | TRMT5      |
| ENSG00000101138 | 411.549746  | 650.5434631 | -0.660734228 | 0.00069613  | 0.00248812  | CSTF1      |
| ENSG00000175518 | 19.59107825 | 2.476859868 | 2.972846659  | 0.000696359 | 0.002488597 | UBQLNL     |
| ENSG00000173401 | 22.28060564 | 2.038888596 | 3.40818854   | 0.000697035 | 0.002490671 | GLIPR1L1   |
| ENSG00000164543 | 851.0390304 | 1505.322984 | -0.822978184 | 0.000697535 | 0.002492115 | STK17A     |
| ENSG00000267279 | 43.06004707 | 144.2609599 | -1.742876335 | 0.00069871  | 0.002495968 | AC090409.1 |
| ENSG00000124713 | 28.79264924 | 7.194455167 | 2.002005816  | 0.000699284 | 0.002497678 | GNMT       |
| ENSG00000169519 | 259.1796594 | 479.0291163 | -0.885997899 | 0.000699925 | 0.002499624 | METTL15    |
| ENSG00000135390 | 2181.455119 | 3701.073898 | -0.762670568 | 0.00070039  | 0.002500939 | ATP5MC2    |
| ENSG00000084754 | 2894.992075 | 4393.76109  | -0.601884184 | 0.000701163 | 0.002503349 | HADHA      |
| ENSG00000228204 | 11.91484679 | 0           | 5.909870888  | 0.000701258 | 0.002503349 | AC004830.1 |
| ENSG00000168938 | 173.3611384 | 475.3841865 | -1.45582305  | 0.000701556 | 0.00250407  | PPIC       |
| ENSG00000211679 | 104.4345104 | 0           | 9.040082157  | 0.000702468 | 0.002506981 | IGLC3      |
| ENSG00000179958 | 232.9960743 | 657.7268991 | -1.497719063 | 0.00070265  | 0.002507284 | DCTPP1     |
| ENSG00000240230 | 610.6495804 | 328.2459523 | 0.895897025  | 0.000703515 | 0.002510027 | COX19      |
| ENSG00000186105 | 9.044152191 | 0           | 5.511359691  | 0.000704065 | 0.002511644 | LRRRC70    |
| ENSG00000117640 | 1028.89701  | 635.1928116 | 0.695996952  | 0.00070423  | 0.002511889 | MTFR1L     |
| ENSG00000197748 | 42.56716245 | 6.124838129 | 2.80005058   | 0.000704353 | 0.002511984 | CFAP43     |
| ENSG00000175967 | 10.17302406 | 0           | 5.681819003  | 0.000705018 | 0.002514009 | FO393415.1 |
| ENSG00000283010 | 9.613011533 | 0           | 5.599762207  | 0.000705314 | 0.002514721 | AL589826.2 |
| ENSG00000161798 | 14.34895661 | 0.336469917 | 5.216368997  | 0.000708751 | 0.002526515 | AQP5       |
| ENSG00000145741 | 4947.150634 | 7843.944205 | -0.66499304  | 0.000708817 | 0.002526515 | BTF3       |
| ENSG00000170049 | 202.9226353 | 69.04953284 | 1.557382385  | 0.000709323 | 0.002527973 | KCNAB3     |
| ENSG00000263958 | 0           | 13.17778214 | -6.303938003 | 0.000710159 | 0.002530604 | AC091138.1 |
| ENSG00000166592 | 52.58724032 | 1561.360577 | -4.891883299 | 0.000711393 | 0.002534653 | RRAD       |

|                 |             |             |              |             |             |             |
|-----------------|-------------|-------------|--------------|-------------|-------------|-------------|
| ENSG00000096401 | 731.2511425 | 1191.11198  | -0.703999515 | 0.00071171  | 0.002535089 | CDC5L       |
| ENSG00000073861 | 24.85744648 | 1.049547942 | 4.543346879  | 0.00071171  | 0.002535089 | TBX21       |
| ENSG00000136141 | 735.3189921 | 392.8948046 | 0.904906713  | 0.000712907 | 0.002539005 | LRCH1       |
| ENSG00000091527 | 2937.007643 | 4623.690717 | -0.654708753 | 0.000714021 | 0.002542622 | CDV3        |
| ENSG00000170627 | 9.764162094 | 0           | 5.620237458  | 0.000715217 | 0.002546185 | GTSF1       |
| ENSG00000260997 | 9.764162094 | 0           | 5.620237458  | 0.000715217 | 0.002546185 | AC004847.1  |
| ENSG00000163600 | 16.92189397 | 0           | 6.413796347  | 0.000715337 | 0.002546261 | ICOS        |
| ENSG00000224596 | 15.83933618 | 132.9567145 | -3.069374258 | 0.000716574 | 0.002550092 | ZMZ1-AS1    |
| ENSG00000262003 | 0           | 10.79296702 | -6.016592905 | 0.000716609 | 0.002550092 | AC087392.1  |
| ENSG00000236107 | 17.95860839 | 0.356539013 | 5.539414788  | 0.000717367 | 0.002552439 | SCN1A-AS1   |
| ENSG00000167543 | 1605.11038  | 897.3318841 | 0.838922122  | 0.000719214 | 0.002558661 | TP53I13     |
| ENSG00000134259 | 72.48774213 | 9.691384131 | 2.902433403  | 0.000719619 | 0.00255975  | NGF         |
| ENSG00000142279 | 1254.59104  | 583.2264011 | 1.104563859  | 0.000719804 | 0.00256006  | WTIP        |
| ENSG00000187257 | 591.2482158 | 348.8366039 | 0.761013607  | 0.000721018 | 0.002564027 | RSBN1L      |
| ENSG00000089012 | 17.54236672 | 0           | 6.465781164  | 0.00072128  | 0.002564604 | SIRPG       |
| ENSG00000267745 | 73.52618092 | 26.59973267 | 1.462839688  | 0.000723585 | 0.00257245  | AC060766.7  |
| ENSG00000198677 | 1719.296059 | 2560.316595 | -0.574542106 | 0.000724768 | 0.002576304 | TTC37       |
| ENSG00000170315 | 1647.83281  | 5019.370546 | -1.60698907  | 0.000725554 | 0.002578744 | UBB         |
| ENSG00000079785 | 1711.720602 | 2893.64884  | -0.757574582 | 0.000729381 | 0.00259199  | DDX1        |
| ENSG00000286378 | 9.740271497 | 0           | 5.617021627  | 0.000730092 | 0.002594162 | AL713852.2  |
| ENSG00000227155 | 12.14791215 | 0.356539013 | 4.974033555  | 0.000731108 | 0.002597418 | AL161725.1  |
| ENSG00000229638 | 273.3419635 | 475.6130377 | -0.799218205 | 0.000731659 | 0.00259902  | RPL4P4      |
| ENSG00000214456 | 10.98128828 | 0           | 5.789959904  | 0.000733144 | 0.002603939 | PLIN5       |
| ENSG00000173621 | 592.7585825 | 1330.354149 | -1.166530384 | 0.000734544 | 0.002608554 | LRFN4       |
| ENSG00000118217 | 898.3687059 | 1362.288572 | -0.600805248 | 0.000734712 | 0.002608796 | ATF6        |
| ENSG00000237476 | 29.60940426 | 7.114178783 | 2.051966352  | 0.000736432 | 0.002614478 | LINC01637   |
| ENSG00000284194 | 39.91087067 | 11.52598575 | 1.794234974  | 0.000736514 | 0.002614478 | SCO2        |
| ENSG00000170961 | 89.06875695 | 873.0813287 | -3.293236896 | 0.00073976  | 0.002625643 | HAS2        |
| ENSG00000234444 | 368.2626602 | 173.2174415 | 1.087537227  | 0.000740156 | 0.002626688 | ZNF736      |
| ENSG00000111639 | 1322.119671 | 2466.758096 | -0.89989291  | 0.000742841 | 0.002635859 | MRPL51      |
| ENSG00000109501 | 658.3133362 | 1770.330719 | -1.427138424 | 0.000743234 | 0.002636893 | WFS1        |
| ENSG00000280152 | 0.601596751 | 13.26969849 | -4.456168326 | 0.000743727 | 0.00263828  | AC009078.3  |
| ENSG00000131149 | 705.5087172 | 1067.638929 | -0.597752608 | 0.000743929 | 0.002638636 | GSE1        |
| ENSG00000276855 | 176.9556043 | 69.84319122 | 1.339487654  | 0.000746585 | 0.002647343 | AC015922.3  |
| ENSG00000263126 | 27.45091294 | 6.817847059 | 2.010275949  | 0.00074665  | 0.002647343 | AC040162.3  |
| ENSG00000179766 | 28.70292782 | 4.035198856 | 2.845359564  | 0.000746689 | 0.002647343 | ATP8B5P     |
| ENSG00000139154 | 979.0343719 | 514.9406716 | 0.9274214    | 0.000748145 | 0.002652143 | AEBP2       |
| ENSG00000272602 | 202.4689976 | 86.10807845 | 1.233685172  | 0.000748996 | 0.002654797 | ZNF595      |
| ENSG00000173960 | 1212.780773 | 635.5311734 | 0.931940887  | 0.000749559 | 0.002656429 | UBXN2A      |
| ENSG00000279846 | 9.385245505 | 0           | 5.564133398  | 0.000751121 | 0.002661605 | AC015660.4  |
| ENSG00000231856 | 32.88297732 | 5.931292029 | 2.454947234  | 0.000751379 | 0.002662153 | AL162377.1  |
| novel.645       | 8.514369774 | 35.25462149 | -2.055458739 | 0.000752009 | 0.002663714 | -           |
| ENSG00000159166 | 11.65086714 | 0           | 5.874970969  | 0.000752024 | 0.002663714 | LAD1        |
| ENSG00000170615 | 12.06223641 | 0.387220594 | 4.965079535  | 0.000752173 | 0.002663791 | SLC26A5     |
| ENSG00000180846 | 0.308355904 | 11.16829086 | -5.100039304 | 0.000752251 | 0.002663791 | CSNK1G2-AS1 |
| ENSG00000103042 | 363.9932735 | 666.2212092 | -0.872125811 | 0.000753358 | 0.002667347 | SLC38A7     |
| ENSG00000041357 | 1793.115591 | 3090.152323 | -0.785308435 | 0.000754215 | 0.002670019 | PSMA4       |
| ENSG00000064490 | 574.974873  | 948.0220917 | -0.721293137 | 0.000755003 | 0.002672167 | REFXANK     |
| ENSG00000130751 | 26.95143191 | 163.7068204 | -2.603604011 | 0.000755028 | 0.002672167 | NPAS1       |
| ENSG00000138629 | 491.2623045 | 874.8518647 | -0.832903511 | 0.000757349 | 0.002679751 | UBL7        |
| ENSG00000171806 | 163.8288319 | 91.93175175 | 0.833712597  | 0.00075747  | 0.002679751 | METTL18     |



|                 |             |             |              |             |             |            |
|-----------------|-------------|-------------|--------------|-------------|-------------|------------|
| ENSG00000126088 | 1371.665365 | 2287.949343 | -0.738034449 | 0.00075748  | 0.002679751 | UROD       |
| ENSG00000229246 | 114.2368104 | 0           | 9.169521717  | 0.000757856 | 0.002680716 | LINC00377  |
| ENSG00000273214 | 9.988167176 | 0           | 5.653996479  | 0.000758541 | 0.002682772 | AL031587.4 |
| ENSG00000134571 | 22.19145368 | 1.548882377 | 3.900905765  | 0.000758729 | 0.002683075 | MYBPC3     |
| ENSG00000249743 | 9.128574284 | 0           | 5.523410284  | 0.000759982 | 0.002686406 | AC116345.1 |
| ENSG00000167755 | 9.128574284 | 0           | 5.523410284  | 0.000759982 | 0.002686406 | KLK6       |
| ENSG00000259485 | 9.128574284 | 0           | 5.523410284  | 0.000759982 | 0.002686406 | LINC02253  |
| ENSG00000103550 | 163.3407759 | 337.3894815 | -1.047498233 | 0.000763392 | 0.002698093 | KNOP1      |
| ENSG00000188186 | 1801.673953 | 1037.885395 | 0.795587767  | 0.000765079 | 0.002703689 | LAMTOR4    |
| ENSG00000116044 | 2758.496412 | 1447.696312 | 0.929888175  | 0.000766687 | 0.002709002 | NFE2L2     |
| ENSG00000001631 | 262.43457   | 147.6882249 | 0.829424053  | 0.000768007 | 0.002713239 | KRIT1      |
| ENSG00000256481 | 16.39404938 | 0.356539013 | 5.408432498  | 0.000768095 | 0.002713239 | AP006333.2 |
| ENSG00000104327 | 16.25077672 | 0.672939833 | 4.524800894  | 0.00076927  | 0.002717022 | CALB1      |
| ENSG00000284052 | 41.12548955 | 11.61931476 | 1.81336034   | 0.000769506 | 0.002717487 | AC006460.2 |
| ENSG00000234215 | 36.55330244 | 0.672939833 | 5.71191166   | 0.000771941 | 0.002725715 | CT66       |
| ENSG00000260742 | 21.38952899 | 3.159256312 | 2.74260539   | 0.000772967 | 0.002728965 | AC009962.1 |
| ENSG00000161298 | 151.4716028 | 72.18311625 | 1.068501364  | 0.000773886 | 0.002731838 | ZNF382     |
| ENSG00000286746 | 32.84092274 | 0.713078025 | 5.518361186  | 0.000774698 | 0.002734334 | AL590807.1 |
| ENSG00000267612 | 15.11055074 | 0.672939833 | 4.417230842  | 0.00077696  | 0.002741944 | AC008759.2 |
| ENSG00000279838 | 30.33887389 | 2.527610546 | 3.590568179  | 0.000777553 | 0.00274361  | AL356273.3 |
| ENSG00000166763 | 9.602911072 | 0           | 5.598349495  | 0.000777643 | 0.00274361  | STRCP1     |
| ENSG00000198520 | 58.14982741 | 15.73479    | 1.885486205  | 0.000778907 | 0.002747695 | ARMH1      |
| ENSG00000163354 | 23.35940248 | 3.974991568 | 2.560091855  | 0.000780761 | 0.002753863 | DCST2      |
| ENSG00000231298 | 0.616711807 | 14.554215   | -4.581696026 | 0.000781223 | 0.002755116 | MANCR      |
| novel.307       | 13.50447878 | 0.356539013 | 5.12849608   | 0.000781901 | 0.002757136 | -          |
| ENSG00000166762 | 120.2958876 | 36.98412573 | 1.700173562  | 0.000782072 | 0.002757365 | CATSPER2   |
| ENSG00000274659 | 21.84276721 | 3.11911812  | 2.780838598  | 0.000782338 | 0.002757927 | LINC02371  |
| ENSG00000263001 | 516.8671002 | 854.4958773 | -0.725600438 | 0.000784022 | 0.002763489 | GTF2I      |
| ENSG00000285906 | 11.75262686 | 45.7766729  | -1.956530101 | 0.000785386 | 0.002767693 | AC083855.2 |
| ENSG00000082175 | 88.71609502 | 0           | 8.804745135  | 0.000785428 | 0.002767693 | PGR        |
| ENSG00000135709 | 394.8148443 | 172.3263101 | 1.194669605  | 0.000785672 | 0.002768179 | KIAA0513   |
| ENSG00000162576 | 7664.268957 | 4080.959695 | 0.909183664  | 0.000785923 | 0.002768688 | MXRA8      |
| ENSG00000120063 | 1399.63633  | 834.1238843 | 0.746885325  | 0.000786848 | 0.002771569 | GNA13      |
| ENSG00000272381 | 25.1985398  | 0.693008929 | 5.151340206  | 0.000789925 | 0.002782032 | LINC02664  |
| ENSG00000184178 | 262.3076222 | 554.0863436 | -1.079480861 | 0.000790144 | 0.002782424 | SCFD2      |
| ENSG00000196337 | 0.307102255 | 11.8707564  | -5.188470396 | 0.000791649 | 0.002787329 | CGB7       |
| ENSG00000260464 | 22.75655208 | 3.709341424 | 2.641339352  | 0.000791751 | 0.002787329 | AL049796.1 |
| ENSG00000275464 | 155.4248826 | 395.717475  | -1.349135812 | 0.000792218 | 0.002788594 | FP565260.1 |
| ENSG00000254040 | 10.50025597 | 0           | 5.727073867  | 0.000793265 | 0.002791903 | AC103719.1 |
| ENSG00000171045 | 297.1986679 | 132.1500163 | 1.171300872  | 0.000793487 | 0.002792305 | TSNARE1    |
| ENSG00000128641 | 816.474713  | 3262.349449 | -1.998462643 | 0.000794054 | 0.002793921 | MYO1B      |
| ENSG00000287684 | 10.70817708 | 0           | 5.753297413  | 0.000794163 | 0.002793928 | AL392172.2 |
| ENSG00000171759 | 10.74313705 | 0           | 5.760576689  | 0.000794336 | 0.002794157 | PAH        |
| ENSG00000117118 | 862.1686616 | 1487.490871 | -0.786836829 | 0.000796304 | 0.002800701 | SDHB       |
| ENSG00000286758 | 11.79671838 | 0.356539013 | 4.93242812   | 0.000796912 | 0.002802459 | AL445438.1 |
| ENSG00000196951 | 40.79066448 | 12.42199739 | 1.725847967  | 0.00079852  | 0.002807734 | SCOC-AS1   |
| ENSG00000011454 | 1508.57227  | 947.7057589 | 0.670944733  | 0.000798741 | 0.002808133 | RABGAP1    |
| ENSG00000168036 | 4034.839175 | 8186.314759 | -1.020738431 | 0.000798962 | 0.002808529 | CTNNB1     |
| ENSG00000127241 | 34.6668112  | 3.913628404 | 3.141522605  | 0.000802823 | 0.002821719 | MASP1      |
| ENSG00000247982 | 94.57887574 | 39.86583514 | 1.246383545  | 0.000803291 | 0.002822981 | LINC00926  |
| ENSG00000287405 | 13.18985463 | 0.356539013 | 5.094696912  | 0.00080393  | 0.002824844 | AC017028.2 |

|                 |             |             |              |             |             |            |
|-----------------|-------------|-------------|--------------|-------------|-------------|------------|
| ENSG00000275216 | 0           | 10.4966353  | -5.975963381 | 0.00080518  | 0.002828854 | AL161431.1 |
| ENSG00000247596 | 738.9899851 | 1408.149701 | -0.930043588 | 0.000805454 | 0.002829434 | TWF2       |
| ENSG00000178078 | 31.60066106 | 87.4682138  | -1.471618387 | 0.000806013 | 0.002831015 | STAP2      |
| ENSG00000137522 | 294.7023304 | 506.7705704 | -0.78211972  | 0.000806151 | 0.002831117 | RNF121     |
| ENSG00000139289 | 3298.207187 | 7132.806945 | -1.112770883 | 0.000809691 | 0.002842995 | PHLDA1     |
| ENSG00000119718 | 337.3218892 | 694.1050048 | -1.041569034 | 0.000809752 | 0.002842995 | EIF2B2     |
| ENSG00000259462 | 13.90735724 | 0.693008929 | 4.286467228  | 0.000810039 | 0.002843617 | CPEB1-AS1  |
| ENSG00000146285 | 23.49801655 | 1.345879667 | 4.074705747  | 0.000811105 | 0.002846977 | SCML4      |
| ENSG00000124831 | 938.6361945 | 2069.032478 | -1.140350584 | 0.000811235 | 0.002846989 | LRRFIP1    |
| ENSG00000247498 | 8.495493772 | 48.66981234 | -2.521818448 | 0.000811328 | 0.002846989 | GPRC5D-AS1 |
| ENSG00000287281 | 18.98342672 | 1.029478846 | 4.161887564  | 0.000812087 | 0.002849267 | AC012101.2 |
| ENSG00000186222 | 273.6381386 | 482.388516  | -0.818249666 | 0.000813178 | 0.002852711 | BLOC1S4    |
| ENSG00000278897 | 22.49827121 | 2.200597239 | 3.370541951  | 0.000813859 | 0.002854715 | AC020951.1 |
| ENSG00000167588 | 18.50873392 | 1.487519214 | 3.667944135  | 0.000815679 | 0.002860711 | GPD1       |
| ENSG00000135766 | 193.4525957 | 459.8661965 | -1.248953672 | 0.000816084 | 0.002861694 | EGLN1      |
| ENSG00000174903 | 1485.940539 | 2565.08812  | -0.787577018 | 0.000816179 | 0.002861694 | RAB1B      |
| ENSG00000204311 | 81.21684325 | 31.34800955 | 1.369879234  | 0.00081672  | 0.002863203 | PJVK       |
| ENSG00000009954 | 1667.215694 | 2631.771898 | -0.658582508 | 0.000817421 | 0.002865276 | BAZ1B      |
| ENSG00000248890 | 35.85983333 | 267.109325  | -2.897722636 | 0.000817868 | 0.002866454 | HHIP-AS1   |
| ENSG00000051620 | 830.8983832 | 1530.852642 | -0.881373332 | 0.000818163 | 0.002867102 | HEBP2      |
| ENSG00000244953 | 10.01832602 | 0           | 5.657985473  | 0.000819045 | 0.002869806 | AC087521.1 |
| ENSG00000133872 | 4962.052387 | 2629.294201 | 0.91628493   | 0.000819227 | 0.002870057 | SARAF      |
| ENSG00000112234 | 896.2078379 | 473.0178862 | 0.922264766  | 0.000819589 | 0.002870937 | FBXL4      |
| ENSG00000173557 | 12.13537566 | 0           | 5.93471965   | 0.000820252 | 0.002872873 | C2orf70    |
| ENSG00000129515 | 1378.402281 | 2419.588328 | -0.811922598 | 0.000821816 | 0.002877962 | SNX6       |
| ENSG00000152223 | 714.3297348 | 1222.178367 | -0.774585963 | 0.000824255 | 0.002886116 | EPG5       |
| ENSG00000005189 | 50.06132905 | 171.6067764 | -1.778097175 | 0.000825676 | 0.002890701 | REXO5      |
| ENSG00000197021 | 338.1407246 | 552.8445682 | -0.709598017 | 0.000825974 | 0.002891353 | CXorf40B   |
| ENSG00000126581 | 627.4987467 | 982.9141717 | -0.647498832 | 0.000826511 | 0.002892626 | BECN1      |
| ENSG00000100564 | 337.4711179 | 155.3753021 | 1.117757454  | 0.00082656  | 0.002892626 | PIGH       |
| ENSG00000196597 | 97.88769385 | 35.62981694 | 1.459224735  | 0.000828144 | 0.00289778  | ZNF782     |
| ENSG00000021488 | 18.34128593 | 0.774441189 | 4.642984927  | 0.000829165 | 0.002900962 | SLC7A9     |
| ENSG00000100427 | 12.99238999 | 0.356539013 | 5.071833155  | 0.000829351 | 0.002901221 | MLC1       |
| ENSG00000196159 | 172.8623416 | 444.0239284 | -1.36168398  | 0.000831312 | 0.00290769  | FAT4       |
| ENSG00000179262 | 1342.225375 | 2128.283466 | -0.664954109 | 0.000832833 | 0.002912618 | RAD23A     |
| ENSG00000165698 | 188.4075118 | 105.0917765 | 0.841160519  | 0.000835717 | 0.002922309 | SPACA9     |
| ENSG00000272995 | 10.21084734 | 0           | 5.686677373  | 0.000836229 | 0.002923707 | AC097505.1 |
| novel.487       | 5.201791061 | 41.60325494 | -3.001134696 | 0.000837822 | 0.002928881 | -          |
| ENSG00000188662 | 26.01250279 | 2.751966622 | 3.212291674  | 0.000838194 | 0.00292979  | HILS1      |
| ENSG00000137288 | 595.2236344 | 981.2056488 | -0.721235219 | 0.000838567 | 0.0029307   | UQC2       |
| ENSG00000233927 | 3098.270342 | 7127.74379  | -1.202007759 | 0.000841179 | 0.00293943  | RPS28      |
| ENSG00000175773 | 15.87687472 | 0.723690511 | 4.466209503  | 0.000841997 | 0.002941785 | AP002986.1 |
| ENSG00000179523 | 283.755433  | 147.300876  | 0.946234041  | 0.000842079 | 0.002941785 | EIF3J-DT   |
| ENSG00000177409 | 1351.183478 | 586.9781321 | 1.20248424   | 0.000844251 | 0.002948977 | SAMD9L     |
| novel.104       | 54.60364171 | 16.53045616 | 1.72505475   | 0.000848014 | 0.002961722 | -          |
| ENSG00000242220 | 16.66117707 | 1.456837632 | 3.52861636   | 0.000848431 | 0.002962694 | TCP10L     |
| ENSG00000165591 | 11.80173297 | 0.356539013 | 4.93295761   | 0.00084852  | 0.002962694 | FAAH2      |
| ENSG00000144395 | 33.45907382 | 124.0432048 | -1.887775925 | 0.000849286 | 0.002964971 | CCDC150    |
| ENSG00000126838 | 15.18487237 | 0.713078025 | 4.403881008  | 0.000852226 | 0.002974833 | PZP        |
| ENSG00000111731 | 915.499605  | 501.8292266 | 0.866812237  | 0.000852711 | 0.002976128 | C2CD5      |
| ENSG00000225098 | 0.307102255 | 15.54368405 | -5.581364393 | 0.000852842 | 0.002976184 | BCRP1      |

|                 |             |             |              |             |             |            |
|-----------------|-------------|-------------|--------------|-------------|-------------|------------|
| ENSG00000256292 | 0           | 92.68222418 | -9.11511946  | 0.000853918 | 0.00297954  | LINC02376  |
| ENSG00000197291 | 73.78141216 | 7.133092004 | 3.368371217  | 0.000854817 | 0.002982274 | RAMP2-AS1  |
| ENSG00000127720 | 112.3404468 | 51.28903527 | 1.132875629  | 0.000856633 | 0.002988209 | METTL25    |
| ENSG00000170745 | 406.4563932 | 87.38463255 | 2.219258344  | 0.000857965 | 0.002992454 | KCNS3      |
| ENSG00000145536 | 45.27698987 | 4.178122672 | 3.424066792  | 0.000858679 | 0.002994542 | ADAMTS16   |
| ENSG00000198888 | 40414.70941 | 21451.41499 | 0.913813157  | 0.000861312 | 0.003003323 | MT-ND1     |
| ENSG00000145375 | 134.7281827 | 299.2982503 | -1.152474304 | 0.000862605 | 0.003007428 | SPATA5     |
| ENSG00000170832 | 1990.608321 | 1068.636652 | 0.897566536  | 0.000864893 | 0.003014998 | USP32      |
| ENSG00000125037 | 688.0299862 | 1178.005031 | -0.775976601 | 0.000867845 | 0.003024882 | EMC3       |
| ENSG00000185596 | 666.1981343 | 372.2556797 | 0.839846031  | 0.000869283 | 0.003029489 | WASH3P     |
| ENSG00000229191 | 16.79979114 | 0.743759607 | 4.533237686  | 0.000869985 | 0.00303153  | AL358473.1 |
| ENSG00000211829 | 15.99807991 | 0           | 6.332772438  | 0.000870567 | 0.003033151 | TRDC       |
| ENSG00000233384 | 2.138361675 | 44.720832   | -4.388316697 | 0.000871921 | 0.003037459 | AC096537.1 |
| ENSG00000183807 | 74.54042807 | 8.990202861 | 3.041246298  | 0.000872317 | 0.003038301 | FAM162B    |
| ENSG00000107798 | 2494.50653  | 1389.586883 | 0.843953255  | 0.000872396 | 0.003038301 | LIPA       |
| ENSG00000123643 | 463.5741109 | 208.4878125 | 1.151553613  | 0.000876856 | 0.003053423 | SLC36A1    |
| ENSG00000100554 | 822.1244748 | 1580.934719 | -0.943493154 | 0.00087847  | 0.003058634 | ATP6V1D    |
| ENSG00000184678 | 377.0259788 | 147.6082869 | 1.354375051  | 0.000879225 | 0.003060854 | HIST2H2BE  |
| ENSG00000127955 | 527.0564777 | 1016.099129 | -0.947062906 | 0.000883645 | 0.003075829 | GNAI1      |
| ENSG00000181929 | 949.605078  | 1493.922666 | -0.653712351 | 0.00088401  | 0.003076687 | PRKAG1     |
| ENSG00000234997 | 1.17296339  | 28.64178492 | -4.587728739 | 0.000885502 | 0.003081468 | AC016745.1 |
| ENSG00000256660 | 15.37753588 | 0           | 6.275663607  | 0.000887493 | 0.003087981 | CLEC12B    |
| ENSG00000156564 | 17.54738132 | 0           | 6.466218479  | 0.000887955 | 0.003089174 | LRFN2      |
| ENSG00000188649 | 26.70840828 | 3.53586442  | 2.906839862  | 0.000889943 | 0.003095676 | CC2D2B     |
| ENSG00000197928 | 271.6253563 | 164.6648247 | 0.722535535  | 0.000890225 | 0.003096244 | ZNF677     |
| ENSG00000138769 | 44.76440253 | 5.919395274 | 2.930675691  | 0.000890382 | 0.003096375 | CDKL2      |
| ENSG00000101489 | 17.63026503 | 1.130980201 | 4.007796191  | 0.000892666 | 0.003103902 | CELF4      |
| ENSG00000244625 | 32.11539969 | 80.38428424 | -1.322262079 | 0.000894444 | 0.003109668 | MIATNB     |
| ENSG00000113648 | 1876.683578 | 2957.36329  | -0.656055356 | 0.00089506  | 0.003111392 | H2AFY      |
| ENSG00000074696 | 1171.676631 | 2702.462376 | -1.205815185 | 0.000895325 | 0.003111897 | HACD3      |
| ENSG00000260005 | 54.60084932 | 13.28976759 | 2.039405894  | 0.000896489 | 0.003115529 | AC027601.2 |
| ENSG00000184828 | 112.1661162 | 0           | 9.143120216  | 0.000898004 | 0.003120376 | ZBTB7C     |
| novel.707       | 0           | 16.02842479 | -6.580531531 | 0.000900525 | 0.003128715 | -          |
| ENSG00000132639 | 32.5046302  | 140.6461502 | -2.115141581 | 0.000901026 | 0.003130039 | SNAP25     |
| ENSG00000105671 | 583.6209476 | 1147.79509  | -0.97603545  | 0.000901555 | 0.003131457 | DDX49      |
| ENSG00000171443 | 388.6511037 | 223.2214939 | 0.800053247  | 0.000903363 | 0.003137319 | ZNF524     |
| ENSG00000137101 | 69.26603974 | 17.70144616 | 1.977099928  | 0.000904581 | 0.003141127 | CD72       |
| ENSG00000204977 | 564.5436825 | 351.7750529 | 0.682453311  | 0.000906287 | 0.003146632 | TRIM13     |
| ENSG00000272871 | 45.04439488 | 10.52847275 | 2.087845092  | 0.000906935 | 0.003148461 | AL159169.2 |
| ENSG00000271254 | 291.9115853 | 124.5713755 | 1.228867526  | 0.000908739 | 0.003154301 | AC240274.1 |
| ENSG00000178988 | 1663.001666 | 1071.727974 | 0.633772475  | 0.000909687 | 0.003157169 | MRFAP1L1   |
| ENSG00000265800 | 1.203193503 | 15.81866241 | -3.714735635 | 0.000910136 | 0.003158306 | AC022211.3 |
| ENSG00000070061 | 966.1770047 | 1479.151565 | -0.614285441 | 0.000913021 | 0.003167895 | ELP1       |
| ENSG00000169918 | 9.945329305 | 0           | 5.648284982  | 0.000914832 | 0.003173754 | OTUD7A     |
| ENSG00000112414 | 840.5512659 | 96.49115288 | 3.121792017  | 0.000917807 | 0.003183651 | ADGRG6     |
| ENSG00000165244 | 90.79124858 | 242.9406505 | -1.419976894 | 0.000918214 | 0.003184636 | ZNF367     |
| ENSG00000151062 | 41.32900898 | 8.500196642 | 2.276687038  | 0.000921531 | 0.003195716 | CACNA2D4   |
| ENSG00000245648 | 47.87596911 | 4.921882279 | 3.272889356  | 0.000922409 | 0.003198334 | AC022075.1 |
| ENSG00000131469 | 7052.006675 | 12917.71711 | -0.873256532 | 0.000922537 | 0.003198351 | RPL27      |
| ENSG00000179698 | 100.0778546 | 30.81670927 | 1.699661012  | 0.000923635 | 0.003201728 | WDR97      |
| ENSG00000116001 | 2529.814194 | 1435.226129 | 0.817826565  | 0.000926158 | 0.003210048 | TIA1       |

|                 |             |             |              |             |             |            |
|-----------------|-------------|-------------|--------------|-------------|-------------|------------|
| ENSG00000198393 | 467.7968713 | 216.137226  | 1.113762041  | 0.000927575 | 0.003214529 | ZNF26      |
| ENSG00000108219 | 1416.936926 | 3281.427834 | -1.211479073 | 0.000927731 | 0.003214642 | TSPAN14    |
| ENSG00000207611 | 15.21990361 | 0           | 6.262387084  | 0.000928795 | 0.003217899 | MIR149     |
| ENSG00000158623 | 373.8462152 | 713.2751253 | -0.9323783   | 0.000929526 | 0.003219599 | COPG2      |
| ENSG00000225422 | 31.42325479 | 94.79583221 | -1.594738659 | 0.000929534 | 0.003219599 | RBMS1P1    |
| ENSG00000163016 | 18.01147545 | 1.854670712 | 3.309689285  | 0.000929874 | 0.003220348 | ALMS1P1    |
| ENSG00000116459 | 1707.787593 | 2824.846558 | -0.726163221 | 0.000931667 | 0.003226129 | ATP5PB     |
| ENSG00000243224 | 4.602701607 | 27.58650479 | -2.58890218  | 0.00093256  | 0.003228792 | AC006252.1 |
| ENSG00000102245 | 10.09898716 | 0           | 5.668694131  | 0.000932822 | 0.003229267 | CD40LG     |
| ENSG00000102158 | 1280.081467 | 1919.956706 | -0.584723889 | 0.000933488 | 0.003230749 | MAGT1      |
| ENSG00000013503 | 137.2100737 | 294.3644372 | -1.102418124 | 0.000933499 | 0.003230749 | POLR3B     |
| ENSG00000267128 | 20.92250063 | 0.774441189 | 4.828021371  | 0.000933953 | 0.003231891 | RNF157-AS1 |
| ENSG00000170653 | 709.9658958 | 454.0742923 | 0.645193559  | 0.000934506 | 0.003233374 | ATF7       |
| ENSG00000230291 | 18.02186065 | 66.23530397 | -1.880133896 | 0.000938472 | 0.003246662 | AC078817.1 |
| ENSG00000183628 | 15.52471204 | 0.672939833 | 4.457316756  | 0.000938618 | 0.003246737 | DGCR6      |
| ENSG00000260992 | 17.86938517 | 2.884149558 | 2.635287929  | 0.000941882 | 0.003257592 | DOCK9-DT   |
| ENSG00000204241 | 74.92075681 | 2.71054416  | 4.814609481  | 0.000942826 | 0.003260423 | AP000911.1 |
| ENSG00000205903 | 1506.758324 | 773.2659816 | 0.962616745  | 0.000947463 | 0.003276022 | ZNF316     |
| ENSG00000163145 | 51.26996408 | 5.463795051 | 3.211245234  | 0.000948328 | 0.003278578 | C1QTNF7    |
| ENSG00000166855 | 721.6129154 | 1167.080895 | -0.693701    | 0.000950146 | 0.003284425 | CLPX       |
| ENSG00000171105 | 858.5512345 | 382.5913642 | 1.166838252  | 0.000950896 | 0.003286581 | INSR       |
| ENSG00000184985 | 535.391218  | 212.9796863 | 1.328867201  | 0.00095144  | 0.003288025 | SORCS2     |
| ENSG00000135720 | 3541.691507 | 2082.798671 | 0.765979156  | 0.000952468 | 0.00329114  | DYNC1L12   |
| ENSG00000197323 | 1046.667728 | 579.4258412 | 0.853412367  | 0.000952659 | 0.003291362 | TRIM33     |
| ENSG00000188938 | 1249.522748 | 623.6992706 | 1.001935665  | 0.000952805 | 0.003291428 | FAM120AOS  |
| ENSG00000171561 | 11.84213482 | 0           | 5.899360103  | 0.000953995 | 0.003295101 | OR2AT4     |
| ENSG00000182621 | 359.4323264 | 61.61635034 | 2.541843296  | 0.000958974 | 0.003311858 | PLCB1      |
| ENSG00000200714 | 18.1085053  | 2.496928964 | 2.853941793  | 0.000961948 | 0.003321685 | RF00019    |
| ENSG00000090863 | 4045.23304  | 7478.401407 | -0.88646179  | 0.000962409 | 0.003322837 | GLG1       |
| ENSG00000166104 | 0.293240848 | 19.20659433 | -5.879960061 | 0.000964545 | 0.003329769 | AC126323.1 |
| ENSG00000196504 | 1594.524615 | 2510.977756 | -0.655228798 | 0.000965515 | 0.003332676 | PRPF40A    |
| ENSG00000196867 | 354.5948507 | 170.6836664 | 1.054965243  | 0.000967313 | 0.003338438 | ZFP28      |
| ENSG00000008018 | 2316.571426 | 3397.140275 | -0.552313856 | 0.000968196 | 0.00334104  | PSMB1      |
| ENSG00000174928 | 48.69716926 | 18.06872605 | 1.434467226  | 0.000973802 | 0.00335994  | C3orf33    |
| ENSG00000101040 | 1016.891616 | 2048.758998 | -1.010420011 | 0.000975041 | 0.003363767 | ZMYND8     |
| ENSG00000182022 | 543.1967167 | 185.416881  | 1.550757927  | 0.000976618 | 0.003368763 | CHST15     |
| ENSG00000249776 | 26.73620236 | 3.801514564 | 2.789311853  | 0.000976867 | 0.003369174 | AC124854.1 |
| ENSG00000172602 | 22.22788077 | 1.753169357 | 3.646312015  | 0.000977309 | 0.00337025  | RND1       |
| ENSG00000179859 | 164.0087451 | 62.1066477  | 1.402989722  | 0.000977869 | 0.003371734 | RNF227     |
| ENSG00000243431 | 26.66535694 | 4.045811341 | 2.737561709  | 0.000980055 | 0.003378821 | RPL5P30    |
| ENSG00000278266 | 0           | 10.60630899 | -5.986182064 | 0.000980709 | 0.003380628 | AC079949.2 |
| ENSG00000173262 | 1.17296339  | 20.19721925 | -4.079509682 | 0.000982541 | 0.003386495 | SLC2A14    |
| ENSG00000100294 | 215.4999225 | 364.3719872 | -0.758087423 | 0.000984604 | 0.003393156 | MCAT       |
| ENSG00000266378 | 0.601596751 | 14.9166146  | -4.623573588 | 0.000987912 | 0.003404105 | AC005224.2 |
| ENSG00000070718 | 680.1740435 | 388.6975115 | 0.807571322  | 0.000988734 | 0.003406484 | AP3M2      |
| ENSG00000143507 | 113.5207182 | 248.1453327 | -1.127850567 | 0.000990081 | 0.003410674 | DUSP10     |
| ENSG00000115593 | 9.708787736 | 0           | 5.612786716  | 0.000991096 | 0.003413716 | SMYD1      |
| novel.235       | 9.72508517  | 0           | 5.615003882  | 0.000991322 | 0.003414023 | -          |
| ENSG00000248698 | 0.586481695 | 19.11968666 | -5.000512516 | 0.000991448 | 0.003414023 | LINC01085  |
| ENSG00000101353 | 62.95697392 | 23.31890591 | 1.425984525  | 0.000991675 | 0.003414352 | MROH8      |
| ENSG00000139239 | 392.611451  | 639.5367866 | -0.703765805 | 0.000991965 | 0.0034149   | RPL14P1    |

|                 |             |             |              |             |             |            |
|-----------------|-------------|-------------|--------------|-------------|-------------|------------|
| ENSG00000223745 | 629.5280281 | 325.0146731 | 0.954204986  | 0.000992643 | 0.003416782 | CCDC18-AS1 |
| ENSG00000132958 | 11.46063966 | 0.356539013 | 4.891250379  | 0.000993143 | 0.003418048 | TPTE2      |
| ENSG00000236287 | 1243.177457 | 705.3811583 | 0.817336521  | 0.00099328  | 0.003418067 | ZBED5      |
| ENSG00000242686 | 8.761011805 | 0           | 5.465145995  | 0.000994309 | 0.003421155 | AC107464.1 |
| ENSG00000104723 | 413.7269382 | 2175.94135  | -2.39502904  | 0.00099762  | 0.003432094 | TUSC3      |
| ENSG00000104907 | 772.5065296 | 1306.15157  | -0.757690759 | 0.000997893 | 0.003432578 | TRMT1      |
| ENSG00000157613 | 220.9584391 | 1695.057337 | -2.939649577 | 0.000998689 | 0.003434861 | CREB3L1    |
| ENSG00000070540 | 644.2785375 | 1534.290469 | -1.251578296 | 0.000999729 | 0.003437981 | WIP1       |
| ENSG00000126778 | 83.77613231 | 974.6565243 | -3.540651365 | 0.001000064 | 0.00343868  | SIX1       |
| ENSG00000182359 | 142.7539983 | 59.38284131 | 1.268897924  | 0.00100033  | 0.003439138 | KBTBD3     |
| ENSG00000279141 | 12.40709067 | 0.336469917 | 5.005105605  | 0.00100183  | 0.003443841 | AL590226.2 |
| ENSG00000168564 | 495.1008056 | 295.8065056 | 0.742401053  | 0.001002695 | 0.003446359 | CDKN2AIP   |
| ENSG00000161980 | 140.8474483 | 326.324199  | -1.213216691 | 0.001004873 | 0.003453387 | POLR3K     |
| ENSG00000277559 | 2.463086283 | 21.89159398 | -3.164915396 | 0.001009778 | 0.003469786 | AC018553.1 |
| ENSG00000104973 | 529.5388547 | 858.4094252 | -0.696705127 | 0.001011652 | 0.003475763 | MED25      |
| ENSG00000214975 | 31.82591979 | 72.98708315 | -1.198684333 | 0.001014419 | 0.00348481  | PPIAP29    |
| ENSG00000104866 | 527.5069388 | 915.8336415 | -0.795570944 | 0.001015319 | 0.003487439 | PPP1R37    |
| ENSG00000214114 | 145.5777659 | 331.5035935 | -1.188018026 | 0.001015936 | 0.003489099 | MYCBP      |
| ENSG00000179593 | 3.699017196 | 57.83378335 | -3.971187565 | 0.001016938 | 0.003492078 | ALOX15B    |
| ENSG00000133193 | 206.7461757 | 391.6690011 | -0.922145809 | 0.001020111 | 0.003502513 | FAM104A    |
| ENSG00000185442 | 91.01804534 | 26.32591019 | 1.783935703  | 0.001020471 | 0.003503284 | FAM174B    |
| ENSG00000285964 | 0           | 11.00902236 | -6.045849001 | 0.001021336 | 0.003505791 | AC002074.2 |
| ENSG00000196236 | 264.713697  | 460.7743405 | -0.799348362 | 0.001023033 | 0.003511153 | XPNPEP3    |
| ENSG00000138614 | 481.3230021 | 740.9152877 | -0.622273832 | 0.001023279 | 0.003511533 | INTS14     |
| ENSG00000163558 | 605.3943368 | 950.9625819 | -0.651545638 | 0.001024071 | 0.003513786 | PRKCI      |
| novel.272       | 8.738303585 | 0           | 5.461763357  | 0.00102583  | 0.003519357 | -          |
| ENSG00000224914 | 115.5346123 | 37.91223162 | 1.602356166  | 0.001027247 | 0.003523752 | LINC00863  |
| ENSG00000168476 | 561.2614601 | 1061.137402 | -0.918882137 | 0.001031203 | 0.003536856 | REEP4      |
| ENSG00000088038 | 22.51868559 | 75.50587938 | -1.745013714 | 0.001036556 | 0.003554748 | CNOT3      |
| ENSG00000101977 | 20.48870788 | 1.069617038 | 4.252046321  | 0.001039695 | 0.003564753 | MCF2       |
| ENSG00000006704 | 289.5604735 | 527.3465811 | -0.864294299 | 0.001039748 | 0.003564753 | GTF2IRD1   |
| ENSG00000157353 | 538.7168198 | 312.7049311 | 0.784440499  | 0.001040183 | 0.003565773 | FCSK       |
| ENSG00000214694 | 43.69187393 | 8.633663848 | 2.3223104    | 0.001044427 | 0.003579848 | ARHGEF33   |
| ENSG00000286861 | 14.7517638  | 0.693008929 | 4.374107979  | 0.001044939 | 0.00358113  | AL049779.4 |
| ENSG00000174325 | 9.136096177 | 0           | 5.524558838  | 0.001045477 | 0.003582502 | DIRC1      |
| ENSG00000257365 | 416.6794502 | 163.7629525 | 1.347027502  | 0.001045629 | 0.003582552 | FNTB       |
| ENSG00000141627 | 489.3455119 | 906.3645925 | -0.889093839 | 0.001045857 | 0.003582861 | DYM        |
| ENSG00000085832 | 1502.42176  | 957.2810608 | 0.650275582  | 0.001046382 | 0.003584185 | EPS15      |
| ENSG00000120802 | 867.8907197 | 1834.98587  | -1.08036302  | 0.001049181 | 0.003593301 | TMPO       |
| ENSG00000236682 | 85.58092327 | 18.54940406 | 2.199295746  | 0.001049691 | 0.003594573 | MAP3K2-DT  |
| ENSG00000135447 | 12.57976707 | 0           | 5.985826957  | 0.001052333 | 0.003603144 | PPP1R1A    |
| ENSG00000272462 | 90.39270053 | 26.14413245 | 1.782199354  | 0.001052955 | 0.003604799 | U91328.1   |
| ENSG00000007376 | 380.6178093 | 659.6032487 | -0.793259772 | 0.001054395 | 0.003609254 | RPUSD1     |
| ENSG00000236756 | 15.74363125 | 2.160459047 | 2.868447067  | 0.001056118 | 0.003614675 | DNAJC9-AS1 |
| ENSG00000198028 | 0           | 7.827256809 | -5.551164459 | 0.001056644 | 0.003615999 | ZNF560     |
| ENSG00000159450 | 14.49376766 | 0.387220594 | 5.229574858  | 0.001060184 | 0.003627636 | TCHH       |
| ENSG00000226396 | 37.91767605 | 5.909938664 | 2.694199943  | 0.001061187 | 0.003630591 | AL031727.1 |
| ENSG00000167110 | 2169.122338 | 3446.682768 | -0.668014612 | 0.00106225  | 0.003633747 | GOLGA2     |
| ENSG00000025708 | 1580.357179 | 601.7181626 | 1.393478891  | 0.00106323  | 0.003636622 | TYMP       |
| ENSG00000005187 | 52.71102407 | 10.80473538 | 2.275168252  | 0.001063487 | 0.003637024 | ACSM3      |
| ENSG00000136732 | 704.1816361 | 1990.286878 | -1.498984777 | 0.00106537  | 0.003642984 | GYPC       |

|                 |             |             |              |             |             |             |
|-----------------|-------------|-------------|--------------|-------------|-------------|-------------|
| ENSG00000155906 | 260.6013293 | 502.9982904 | -0.949264724 | 0.001065623 | 0.003643367 | RMND1       |
| ENSG00000165682 | 16.00434815 | 0           | 6.333360787  | 0.001070284 | 0.003658822 | CLEC1B      |
| ENSG00000062194 | 1894.329785 | 1242.136393 | 0.609013038  | 0.001071889 | 0.003663827 | GPBP1       |
| ENSG00000168282 | 17.07283107 | 53.97506241 | -1.664994684 | 0.00107349  | 0.003668816 | MGAT2       |
| ENSG00000205710 | 3.36043118  | 23.39789802 | -2.804655257 | 0.001074768 | 0.0036727   | C17orf107   |
| ENSG00000284719 | 21.95720595 | 1.161661783 | 4.302790994  | 0.001075262 | 0.003673907 | AL033527.5  |
| ENSG00000271367 | 15.77135407 | 1.396630344 | 3.471420105  | 0.001078112 | 0.003683158 | AL034374.1  |
| ENSG00000109046 | 11739.4165  | 3516.584178 | 1.739154328  | 0.001079902 | 0.003688789 | WSB1        |
| ENSG00000138738 | 354.7179656 | 147.6340066 | 1.264757648  | 0.001082439 | 0.003696969 | PRDM5       |
| ENSG00000181016 | 61.26404384 | 23.0319024  | 1.413268058  | 0.001084153 | 0.003702336 | LSMEM1      |
| ENSG00000103150 | 311.2803112 | 177.6433286 | 0.808227548  | 0.001090266 | 0.003722722 | MLYCD       |
| ENSG00000101158 | 1008.247734 | 1694.525057 | -0.748877959 | 0.001090532 | 0.003723143 | NELFCD      |
| ENSG00000184640 | 4940.702639 | 7735.115074 | -0.646691007 | 0.001090715 | 0.003723277 | SEPT9       |
| ENSG00000104408 | 3115.177477 | 5652.881708 | -0.859686815 | 0.001090879 | 0.003723349 | EIF3E       |
| ENSG00000163686 | 338.3968107 | 147.5238194 | 1.198074376  | 0.001093326 | 0.003731211 | ABHD6       |
| novel.765       | 54.67051272 | 241.7055189 | -2.144828037 | 0.00109402  | 0.003733089 | -           |
| ENSG00000240654 | 9.876022268 | 0           | 5.638941626  | 0.001094458 | 0.003734094 | C1QTNF9     |
| novel.1066      | 62.93802665 | 23.34945909 | 1.431235339  | 0.001094756 | 0.00373462  | -           |
| ENSG00000140416 | 2284.065749 | 8174.947859 | -1.83963065  | 0.00109962  | 0.003750718 | TPM1        |
| ENSG00000089639 | 540.8261609 | 236.0983551 | 1.196832679  | 0.001105495 | 0.003770264 | GMIP        |
| ENSG00000136379 | 110.0090218 | 414.1726857 | -1.913105225 | 0.001107777 | 0.003777549 | ABHD17C     |
| ENSG00000010244 | 1837.037328 | 2905.786998 | -0.661631969 | 0.001108301 | 0.00377884  | ZNF207      |
| ENSG00000107371 | 278.2094281 | 504.5439279 | -0.859344866 | 0.001109431 | 0.003782137 | EXOSC3      |
| ENSG00000223821 | 11.56017681 | 0.356539013 | 4.902235717  | 0.001109609 | 0.003782137 | AL603910.1  |
| ENSG00000163743 | 405.8668796 | 235.1314894 | 0.787025585  | 0.001109704 | 0.003782137 | RCHY1       |
| ENSG00000148572 | 377.0095815 | 626.0215886 | -0.731298113 | 0.001112177 | 0.003790067 | NRBF2       |
| novel.665       | 46.6230722  | 1.548882377 | 4.95111094   | 0.001113343 | 0.003793542 | -           |
| ENSG00000181450 | 193.4721563 | 85.69865258 | 1.172337396  | 0.001114133 | 0.003795735 | ZNF678      |
| ENSG00000078081 | 34.1269996  | 213.283116  | -2.644913864 | 0.001115567 | 0.003800123 | LAMP3       |
| ENSG00000099365 | 22.75655208 | 118.2100281 | -2.375834283 | 0.001119006 | 0.003811338 | STX1B       |
| ENSG00000130396 | 322.1281968 | 1055.161228 | -1.711850699 | 0.001119604 | 0.003812875 | AFDN        |
| ENSG00000102878 | 141.6995902 | 55.10920626 | 1.365717303  | 0.001120154 | 0.00381421  | HSF4        |
| ENSG00000230091 | 93.10658889 | 20.73926041 | 2.166094101  | 0.001120289 | 0.00381421  | TMEM254-AS1 |
| ENSG00000197912 | 1985.160769 | 3502.580043 | -0.819055071 | 0.001124173 | 0.003826932 | SPG7        |
| novel.792       | 231.047299  | 1069.197546 | -2.210555233 | 0.00112472  | 0.003827691 | -           |
| ENSG00000253123 | 10.66652159 | 0           | 5.748132448  | 0.001124759 | 0.003827691 | AC091182.1  |
| ENSG00000259943 | 178.3200926 | 84.17403044 | 1.084633095  | 0.001124838 | 0.003827691 | AL050341.2  |
| ENSG00000139899 | 85.41269199 | 188.6203382 | -1.141617883 | 0.001126676 | 0.003832639 | CBLN3       |
| ENSG00000130479 | 628.8258811 | 1216.786245 | -0.952059915 | 0.001126693 | 0.003832639 | MAP1S       |
| ENSG00000272368 | 39.57360957 | 6.520359459 | 2.605330198  | 0.001126735 | 0.003832639 | AC074032.1  |
| ENSG00000163393 | 63.12965032 | 144.2788925 | -1.193301141 | 0.001127935 | 0.003836219 | SLC22A15    |
| ENSG00000101189 | 390.2742285 | 720.9234176 | -0.884834653 | 0.001129417 | 0.003840758 | MRGBP       |
| ENSG00000124596 | 619.0149353 | 349.4643156 | 0.824863813  | 0.001130286 | 0.003843209 | OARD1       |
| ENSG00000238266 | 3.620934617 | 27.37789827 | -2.92110926  | 0.001130685 | 0.003844062 | LINC00707   |
| ENSG00000139579 | 502.9497847 | 860.2224291 | -0.77463962  | 0.001132027 | 0.00384812  | NABP2       |
| ENSG00000176826 | 9.05675995  | 48.30150497 | -2.417043652 | 0.001133667 | 0.003853192 | FKBP9P1     |
| ENSG00000196557 | 71.7949565  | 9.447087354 | 2.918743739  | 0.001134631 | 0.003855965 | CACNA1H     |
| ENSG00000175356 | 55.75091886 | 10.43629961 | 2.41771395   | 0.001134832 | 0.003856143 | SCUBE2      |
| ENSG00000268812 | 1.186824798 | 14.85871906 | -3.626457735 | 0.001136226 | 0.003860374 | AC004264.1  |
| ENSG00000227934 | 1.801029308 | 16.25419353 | -3.165726667 | 0.001137017 | 0.003862558 | AL732414.1  |
| ENSG00000101216 | 344.06841   | 586.8363177 | -0.769846108 | 0.001139914 | 0.003871893 | GMEB2       |

|                 |             |             |               |             |             |            |
|-----------------|-------------|-------------|---------------|-------------|-------------|------------|
| ENSG00000280194 | 23.18547243 | 2.261960402 | 3.392263034   | 0.001140358 | 0.003872515 | AD000864.1 |
| ENSG00000143368 | 840.0384378 | 1484.063083 | -0.821192344  | 0.001140395 | 0.003872515 | SF3B4      |
| ENSG00000236204 | 35.98888858 | 7.652495535 | 2.242400337   | 0.001142484 | 0.0038791   | LINC01376  |
| ENSG00000151240 | 1601.602619 | 782.2560901 | 1.034010627   | 0.001143752 | 0.003882898 | DIP2C      |
| ENSG00000234175 | 26.0666235  | 5.513261459 | 2.257115707   | 0.001144606 | 0.003884362 | AL355355.2 |
| ENSG00000172824 | 90.26390218 | 36.1576496  | 1.319812975   | 0.001144612 | 0.003884362 | CES4A      |
| ENSG00000229956 | 35.77254793 | 8.856735655 | 2.008138501   | 0.001144632 | 0.003884362 | ZRANB2-AS2 |
| ENSG00000085117 | 871.2853109 | 3867.772114 | -2.150252593  | 0.001152606 | 0.003910911 | CD82       |
| ENSG00000164105 | 231.5060663 | 400.3689896 | -0.78993111   | 0.001154213 | 0.003915852 | SAP30      |
| ENSG00000134070 | 139.0072712 | 551.1130995 | -1.986840543  | 0.001155502 | 0.003919715 | IRAK2      |
| ENSG00000224152 | 69.13454846 | 18.61192309 | 1.885884523   | 0.001155659 | 0.003919735 | AC009506.1 |
| ENSG00000160097 | 433.4634383 | 7.879291756 | 5.777626092   | 0.001156878 | 0.003923359 | FNDC5      |
| ENSG00000150990 | 310.7240596 | 627.4956141 | -1.014356753  | 0.001158675 | 0.003928718 | DHX37      |
| ENSG00000252464 | 14.46736977 | 1.10029862  | 3.7391089     | 0.001158761 | 0.003928718 | RN7SKP70   |
| ENSG00000126003 | 205.7315722 | 362.0054773 | -0.814508346  | 0.001160163 | 0.003932957 | PLAGL2     |
| ENSG00000033011 | 213.1631982 | 478.8485545 | -1.168326132  | 0.001167016 | 0.003955675 | ALG1       |
| ENSG00000132950 | 409.9603431 | 192.4021689 | 1.092349783   | 0.001169343 | 0.003963046 | ZMYM5      |
| ENSG00000238113 | 301.0423268 | 103.3268388 | 1.542660271   | 0.001172417 | 0.003972944 | LINC01410  |
| ENSG00000259158 | 18.41804359 | 2.547679642 | 2.865966673   | 0.001173488 | 0.003976054 | ADAM20P1   |
| ENSG00000254319 | 0.307102255 | 11.27107648 | -5.117158396  | 0.001173676 | 0.003976173 | AC246817.2 |
| ENSG00000156466 | 10.73074276 | 140.3937751 | -3.7111707052 | 0.001174105 | 0.003977108 | GDF6       |
| ENSG00000129646 | 232.3116098 | 103.5287328 | 1.16491562    | 0.001176341 | 0.003984163 | QRICH2     |
| ENSG00000143164 | 885.6073284 | 1572.54465  | -0.828341267  | 0.001177002 | 0.003985882 | DCAF6      |
| ENSG00000198835 | 142.8685517 | 38.60639642 | 1.884496616   | 0.00117761  | 0.00398742  | GJC2       |
| ENSG00000135111 | 202.624391  | 944.6971792 | -2.221297755  | 0.001179241 | 0.003992424 | TBX3       |
| ENSG00000121644 | 589.7166351 | 992.0308722 | -0.750698592  | 0.001181039 | 0.003997992 | DESI2      |
| ENSG00000226308 | 11.59262948 | 0           | 5.8703452     | 0.001183021 | 0.004004179 | AL122058.1 |
| ENSG00000153714 | 161.2219031 | 78.54266616 | 1.038639425   | 0.001184283 | 0.004007808 | LURAP1L    |
| ENSG00000147677 | 2227.764307 | 3622.143458 | -0.701260666  | 0.001184402 | 0.004007808 | EIF3H      |
| ENSG00000259146 | 17.56102926 | 51.59037568 | -1.557904944  | 0.001184879 | 0.004008901 | AC005476.2 |
| ENSG00000198858 | 725.9445859 | 1193.552101 | -0.717601499  | 0.001185616 | 0.004010871 | R3HDM4     |
| ENSG00000262001 | 37.70488288 | 100.7985863 | -1.418007425  | 0.001188307 | 0.004019451 | DLGAP1-AS2 |
| ENSG00000154511 | 98.29991697 | 264.5984662 | -1.429232605  | 0.00118898  | 0.004021203 | DIPK1A     |
| ENSG00000113555 | 122.168118  | 41.30833588 | 1.568263058   | 0.00119002  | 0.004024196 | PCDH12     |
| ENSG00000038427 | 988.0352765 | 4089.173111 | -2.049247998  | 0.001190363 | 0.004024834 | VCAN       |
| ENSG00000034533 | 176.7775298 | 77.87242326 | 1.181309708   | 0.00119083  | 0.004025889 | ASTE1      |
| ENSG00000101343 | 400.8316385 | 686.1264634 | -0.775891961  | 0.001194857 | 0.004038977 | CRNKL1     |
| ENSG00000197448 | 2879.916945 | 1625.892295 | 0.824624555   | 0.001196011 | 0.004041866 | GSTK1      |
| ENSG00000125843 | 188.6019984 | 361.7064615 | -0.94025669   | 0.001196023 | 0.004041866 | AP5S1      |
| ENSG00000279283 | 1.21705491  | 12.62628437 | -3.37837568   | 0.001196817 | 0.004044025 | AC131009.4 |
| ENSG00000143442 | 2600.165245 | 1193.974027 | 1.12301101    | 0.001197004 | 0.004044131 | POGZ       |
| ENSG00000253106 | 72.93092368 | 25.66815916 | 1.509569211   | 0.001198852 | 0.004049849 | AC090198.1 |
| ENSG00000253288 | 14.13666165 | 0           | 6.154273879   | 0.001200239 | 0.004054006 | AC046195.1 |
| ENSG00000111962 | 1103.955855 | 403.132665  | 1.453967944   | 0.001200877 | 0.004055633 | UST        |
| ENSG00000215193 | 741.9203292 | 1122.081104 | -0.596641704  | 0.00120694  | 0.004075578 | PEX26      |
| ENSG00000233894 | 8.705566175 | 0           | 5.456829002   | 0.001207298 | 0.004076259 | AC105271.1 |
| ENSG00000213057 | 36.45348091 | 9.111773312 | 1.988235421   | 0.001208565 | 0.004080006 | C1orf220   |
| ENSG00000196363 | 867.3112621 | 1467.47438  | -0.758835048  | 0.001208808 | 0.004080296 | WDR5       |
| ENSG00000130822 | 32.41706007 | 5.430673325 | 2.582693914   | 0.001209387 | 0.004081721 | PNCK       |
| ENSG00000287789 | 11.42783098 | 0           | 5.84875879    | 0.001210282 | 0.004084211 | AL158136.1 |
| ENSG00000162729 | 1396.929112 | 678.685212  | 1.041936341   | 0.001211261 | 0.004086746 | IGSF8      |

|                 |             |             |              |             |             |                |
|-----------------|-------------|-------------|--------------|-------------|-------------|----------------|
| ENSG00000130363 | 140.8939046 | 287.3045452 | -1.027930697 | 0.001211348 | 0.004086746 | RSPH3          |
| ENSG00000168447 | 26.46072606 | 0.743759607 | 5.181330459  | 0.001214183 | 0.004095778 | SCNN1B         |
| ENSG00000229388 | 22.00881936 | 2.751966622 | 2.969424809  | 0.001216825 | 0.004104159 | LINC01715      |
| ENSG00000039523 | 1139.358514 | 1684.951005 | -0.564464511 | 0.001217745 | 0.00410673  | RIPOR1         |
| ENSG00000154898 | 23.80358043 | 3.179325408 | 2.893939876  | 0.00121893  | 0.004110192 | CCDC144CP      |
| ENSG00000175387 | 1963.377277 | 1218.900413 | 0.688009453  | 0.001224759 | 0.004129308 | SMAD2          |
| ENSG00000243953 | 0           | 10.91312481 | -6.024803339 | 0.001226053 | 0.004133137 | AC073359.1     |
| ENSG00000272459 | 17.61271395 | 2.853467977 | 2.619765511  | 0.001230131 | 0.004146347 | AC139795.3     |
| ENSG00000169933 | 7.362789684 | 39.28622433 | -2.421413495 | 0.001234099 | 0.004159182 | FRMPD4         |
| ENSG00000239306 | 602.0798912 | 1031.00713  | -0.776366527 | 0.001234762 | 0.004160875 | RBM14          |
| ENSG00000275022 | 0.909952655 | 13.57317508 | -3.901698971 | 0.001235716 | 0.004163549 | MIR6753        |
| ENSG00000176390 | 469.8503527 | 265.9338617 | 0.820981841  | 0.001236416 | 0.004165369 | CRLF3          |
| ENSG00000156959 | 19.0823944  | 0.774441189 | 4.69593006   | 0.001237585 | 0.004168767 | LHFPL4         |
| ENSG00000156218 | 737.1950433 | 9.265309615 | 6.311252636  | 0.001245561 | 0.00419509  | ADAMTSL3       |
| ENSG00000248592 | 25.16670003 | 5.513261459 | 2.206754451  | 0.001246153 | 0.004196539 | STIMATE-MUSTN1 |
| ENSG00000261305 | 11.98916843 | 0.336469917 | 4.957079942  | 0.001247288 | 0.004199817 | AC005586.2     |
| ENSG00000084444 | 93.94880107 | 232.9770537 | -1.309821809 | 0.001247549 | 0.004200111 | FAM234B        |
| ENSG00000126524 | 3019.587356 | 1622.094505 | 0.896307297  | 0.001247699 | 0.004200111 | SBDS           |
| ENSG00000105270 | 2135.617068 | 992.6716459 | 1.10559317   | 0.001248741 | 0.004203075 | CLIP3          |
| ENSG00000272356 | 31.13614    | 8.601697997 | 1.855520232  | 0.001250858 | 0.004209657 | AL080317.3     |
| ENSG00000245571 | 96.170189   | 37.1150244  | 1.374580611  | 0.001251399 | 0.00421093  | FAM111A-DT     |
| ENSG00000204876 | 9.30340198  | 0           | 5.552533472  | 0.001251613 | 0.004211104 | AC021218.1     |
| ENSG00000075336 | 400.0558273 | 754.7066327 | -0.916166799 | 0.001253298 | 0.00421623  | TIMM21         |
| novel.643       | 111.5911757 | 52.53328518 | 1.090306805  | 0.001255884 | 0.004224381 | -              |
| novel.462       | 41.36364042 | 208.6492175 | -2.33545661  | 0.001256275 | 0.004225036 | -              |
| ENSG00000229944 | 81.47344355 | 169.6858966 | -1.058349095 | 0.001256404 | 0.004225036 | EIF4EP2        |
| ENSG00000273007 | 41.10403498 | 13.63453824 | 1.592064232  | 0.001257901 | 0.004229525 | AC021205.3     |
| ENSG00000125144 | 2.446717578 | 21.78294777 | -3.163385433 | 0.001260287 | 0.004236998 | MT1G           |
| ENSG00000182165 | 186.6649336 | 82.62660791 | 1.173352293  | 0.001264791 | 0.004251589 | TP53TG1        |
| ENSG00000173275 | 432.7104569 | 169.9990866 | 1.347863225  | 0.001267438 | 0.004259472 | ZNF449         |
| ENSG00000273143 | 1.203193503 | 13.77733366 | -3.509316418 | 0.001267464 | 0.004259472 | AL355512.1     |
| ENSG00000231170 | 36.50516559 | 3.72123818  | 3.266232829  | 0.001275594 | 0.004286241 | AC002451.1     |
| ENSG00000186715 | 51.21101475 | 8.314822883 | 2.626088325  | 0.001277905 | 0.004293451 | MST1L          |
| ENSG00000151948 | 12.909435   | 0           | 6.023120308  | 0.001278505 | 0.004294911 | GLT1D1         |
| ENSG00000141441 | 305.5720867 | 147.8929786 | 1.048943077  | 0.001283633 | 0.004311578 | GAREM1         |
| ENSG00000196535 | 1922.407755 | 929.3838146 | 1.048869104  | 0.00128391  | 0.004311953 | MYO18A         |
| ENSG00000210077 | 21.30768546 | 2.782648203 | 2.915317768  | 0.001285058 | 0.004315249 | MT-TV          |
| ENSG00000160094 | 929.8195677 | 423.1429132 | 1.135131275  | 0.001291128 | 0.004335072 | ZNF362         |
| ENSG00000197142 | 215.0470675 | 58.47133689 | 1.881203861  | 0.001291523 | 0.00433584  | ACSL5          |
| ENSG00000133256 | 149.9618052 | 19.68051265 | 2.924626951  | 0.001293759 | 0.004342785 | PDE6B          |
| ENSG00000254027 | 24.12948741 | 4.912425669 | 2.281192996  | 0.001295539 | 0.004347816 | AC009902.2     |
| ENSG00000065548 | 971.3000847 | 1622.759632 | -0.740678482 | 0.001295612 | 0.004347816 | ZC3H15         |
| ENSG00000143436 | 381.2294634 | 645.8236504 | -0.760770584 | 0.00129576  | 0.004347816 | MRPL9          |
| ENSG00000215186 | 17.73001599 | 0           | 6.481496376  | 0.001296856 | 0.004350933 | GOLGA6B        |
| ENSG00000137941 | 736.9703142 | 238.8829768 | 1.625558461  | 0.001298081 | 0.00435416  | TTLL7          |
| ENSG00000103194 | 994.1494944 | 1573.676515 | -0.662455571 | 0.001298153 | 0.00435416  | USP10          |
| ENSG00000111885 | 699.5291883 | 1881.569384 | -1.427462043 | 0.001299239 | 0.004357238 | MAN1A1         |
| ENSG00000181830 | 629.3779726 | 954.2995667 | -0.600629782 | 0.001300489 | 0.004360868 | SLC35C1        |
| ENSG00000268062 | 14.61350573 | 1.110911105 | 3.748001064  | 0.001301604 | 0.004364043 | SRP14P4        |
| ENSG00000273487 | 20.25947474 | 1.345879667 | 3.860439671  | 0.001306249 | 0.004379053 | AC104836.1     |
| ENSG00000240875 | 22.14610852 | 89.05636965 | -2.006174359 | 0.001308267 | 0.004385253 | LINC00886      |



|                 |             |             |              |             |             |            |
|-----------------|-------------|-------------|--------------|-------------|-------------|------------|
| ENSG00000135677 | 1980.910591 | 3772.311809 | -0.929320578 | 0.001308608 | 0.004385829 | GNS        |
| ENSG00000183520 | 535.6495152 | 951.9254241 | -0.829856708 | 0.001310847 | 0.004392765 | UTP11      |
| ENSG00000198001 | 682.0957791 | 359.5501933 | 0.923129924  | 0.001313629 | 0.004401522 | IRAK4      |
| ENSG00000113716 | 1314.554904 | 2316.375804 | -0.8171394   | 0.001326119 | 0.004442797 | HMGXB3     |
| ENSG00000152404 | 387.3718211 | 195.8076482 | 0.983752526  | 0.001328051 | 0.004448697 | CWF19L2    |
| ENSG00000156876 | 89.72312166 | 162.5281592 | -0.857035583 | 0.001330917 | 0.004457724 | SASS6      |
| ENSG00000120549 | 689.4801255 | 247.0845768 | 1.480096347  | 0.001331714 | 0.004459652 | KIAA1217   |
| ENSG00000155438 | 396.2739973 | 701.5361323 | -0.824537933 | 0.001331836 | 0.004459652 | NIFK       |
| ENSG00000163808 | 9.795645855 | 67.60926264 | -2.789606694 | 0.001333736 | 0.004465437 | KIF15      |
| ENSG00000129480 | 60.68536877 | 147.2473468 | -1.280801666 | 0.001334564 | 0.004467636 | DTD2       |
| novel.1096      | 17.56486148 | 1.161661783 | 3.986008097  | 0.001334806 | 0.004467869 | -          |
| ENSG00000148468 | 1274.460702 | 743.3458916 | 0.777676065  | 0.001335427 | 0.004469372 | FAM171A1   |
| ENSG00000114473 | 225.908804  | 127.640946  | 0.822477779  | 0.00133652  | 0.004472454 | IQCG       |
| ENSG00000176105 | 606.552197  | 1279.37357  | -1.076788386 | 0.001337523 | 0.004475234 | YES1       |
| ENSG00000136383 | 242.4358277 | 80.05996787 | 1.59834554   | 0.001338868 | 0.004479156 | ALPK3      |
| ENSG00000278540 | 26.05401574 | 82.6513005  | -1.666834648 | 0.001342487 | 0.004490684 | ACACA      |
| ENSG00000233223 | 169.3692089 | 94.31875023 | 0.845441728  | 0.001342991 | 0.004491795 | AC016876.1 |
| ENSG00000227542 | 0.615458159 | 11.86129979 | -4.285809188 | 0.001343347 | 0.004492406 | AC092614.1 |
| ENSG00000108055 | 954.8763899 | 1395.501689 | -0.547512832 | 0.001344863 | 0.004496896 | SMC3       |
| ENSG00000283696 | 14.54545234 | 0.713078025 | 4.342341432  | 0.001345826 | 0.004499537 | AL592295.4 |
| ENSG00000170962 | 1725.656529 | 52.50342115 | 5.037799828  | 0.001346147 | 0.004500032 | PDGFD      |
| ENSG00000254333 | 8.209774817 | 0           | 5.37045076   | 0.001349386 | 0.004510224 | NDST1-AS1  |
| ENSG00000145041 | 407.5510772 | 639.9669238 | -0.650619794 | 0.001349543 | 0.004510224 | DCAF1      |
| ENSG00000284723 | 12.15138836 | 0           | 5.938294805  | 0.001355617 | 0.00452994  | OR8S1      |
| ENSG00000197584 | 9.175173102 | 0           | 5.530286002  | 0.001356666 | 0.004532863 | KCNMB2     |
| ENSG00000099624 | 1246.614285 | 2119.10411  | -0.765495427 | 0.001357955 | 0.004536258 | ATP5F1D    |
| ENSG00000110048 | 1012.781541 | 1625.629758 | -0.682498738 | 0.001358076 | 0.004536258 | OSBP       |
| ENSG00000196914 | 4421.832274 | 2589.452016 | 0.771990971  | 0.001358206 | 0.004536258 | ARHGEF12   |
| ENSG00000249797 | 15.69975319 | 0           | 6.30565327   | 0.001360833 | 0.004544447 | LINC02147  |
| ENSG00000070761 | 1013.100939 | 608.7749035 | 0.734553396  | 0.001363941 | 0.00455424  | CFAP20     |
| ENSG00000165269 | 12.50669909 | 0.387220594 | 5.015616975  | 0.001366868 | 0.004563429 | AQP7       |
| ENSG00000141562 | 542.1604046 | 1256.714633 | -1.212711496 | 0.00136934  | 0.004571093 | NARF       |
| ENSG00000173811 | 15.10170393 | 1.773238453 | 3.079581236  | 0.00137136  | 0.004577249 | CCDC13-AS1 |
| ENSG00000131389 | 470.8731602 | 1498.439879 | -1.67006     | 0.001371788 | 0.00457809  | SLC6A6     |
| ENSG00000186479 | 14.91559339 | 0.774441189 | 4.345873508  | 0.001372346 | 0.004579362 | RGS7BP     |
| ENSG00000179431 | 343.6831647 | 1317.29551  | -1.938673849 | 0.001376022 | 0.00459104  | FJX1       |
| ENSG00000254486 | 0           | 9.65941828  | -5.849338702 | 0.001383136 | 0.004614182 | LINC02547  |
| novel.680       | 85.73802951 | 23.75931732 | 1.845047683  | 0.001384839 | 0.004619246 | -          |
| ENSG00000197119 | 1909.018835 | 732.4496938 | 1.382173761  | 0.001385009 | 0.004619246 | SLC25A29   |
| ENSG00000000003 | 876.2071097 | 469.554781  | 0.899634076  | 0.001386247 | 0.004622575 | TSPAN6     |
| ENSG00000165169 | 1050.422985 | 634.4697503 | 0.727694432  | 0.001386363 | 0.004622575 | DYNLT3     |
| ENSG00000160856 | 12.28136909 | 0           | 5.95117489   | 0.001387476 | 0.00462569  | FCRL3      |
| ENSG00000140105 | 4030.959972 | 2161.02373  | 0.899301149  | 0.001388001 | 0.004626847 | WARS       |
| ENSG00000261123 | 4.792644359 | 24.79465676 | -2.367631089 | 0.001388336 | 0.004627371 | AC009065.5 |
| ENSG00000114942 | 224.5101122 | 577.7560563 | -1.364004275 | 0.001388755 | 0.004628173 | EEF1B2     |
| ENSG00000080947 | 314.4495898 | 146.1085326 | 1.106126416  | 0.001389469 | 0.004629961 | CROCCP3    |
| ENSG00000184083 | 379.5801976 | 215.5680049 | 0.816707753  | 0.001391264 | 0.004635345 | FAM120C    |
| ENSG00000249906 | 11.61909865 | 0           | 5.873385666  | 0.001393361 | 0.004641736 | AC006487.1 |
| ENSG00000123505 | 892.870638  | 1839.892586 | -1.043268206 | 0.001396358 | 0.004650567 | AMD1       |
| ENSG00000254685 | 308.412223  | 163.0101215 | 0.918397723  | 0.001396369 | 0.004650567 | FPGT       |
| ENSG00000226539 | 8.222382576 | 0           | 5.372455067  | 0.001396856 | 0.004651591 | AC012512.1 |

|                 |             |             |              |             |             |            |
|-----------------|-------------|-------------|--------------|-------------|-------------|------------|
| ENSG00000186777 | 2.405133356 | 17.96735309 | -2.899982333 | 0.001397481 | 0.004653076 | ZNF732     |
| ENSG00000101342 | 22.06265534 | 1.161661783 | 4.30802011   | 0.001397979 | 0.004654139 | TLCD2      |
| ENSG00000102802 | 210.2412017 | 1215.49433  | -2.531662854 | 0.001399655 | 0.004659121 | MEDAG      |
| ENSG00000198203 | 47.57868224 | 5.391691008 | 3.141726065  | 0.001401779 | 0.004665592 | SULT1C2    |
| ENSG00000004776 | 184.4049232 | 1281.771424 | -2.797455013 | 0.001403583 | 0.00467092  | HSPB6      |
| ENSG00000183850 | 7.228007828 | 27.74834182 | -1.936710112 | 0.001403739 | 0.00467092  | ZNF730     |
| ENSG00000241399 | 170.9538538 | 50.9645905  | 1.744673635  | 0.001406968 | 0.004681066 | CD302      |
| ENSG00000234899 | 16.3288593  | 1.844058227 | 3.170091172  | 0.001411374 | 0.004695123 | SOX9-AS1   |
| ENSG0000017483  | 84.38976805 | 476.2701714 | -2.497044534 | 0.001414832 | 0.004706023 | SLC38A5    |
| ENSG00000196352 | 543.4088716 | 1021.741949 | -0.911264482 | 0.00141757  | 0.004714528 | CD55       |
| ENSG00000241468 | 1130.864045 | 1995.650649 | -0.819420653 | 0.001420683 | 0.004724277 | ATP5MF     |
| ENSG00000122188 | 11.36264089 | 0           | 5.838854745  | 0.001422857 | 0.004730817 | LAX1       |
| ENSG00000099994 | 105.9432681 | 978.2568725 | -3.20721067  | 0.001423135 | 0.004730817 | SUSD2      |
| ENSG00000197780 | 488.1632313 | 879.2258795 | -0.849060675 | 0.001423196 | 0.004730817 | TAF13      |
| ENSG00000253873 | 34.07850639 | 150.700028  | -2.145344317 | 0.001426782 | 0.00474213  | PCDHGA11   |
| ENSG00000102218 | 610.6844253 | 364.0334623 | 0.745868819  | 0.001427639 | 0.004744369 | RP2        |
| ENSG00000146733 | 249.2525498 | 531.5147121 | -1.093115402 | 0.001428461 | 0.004746496 | PSPH       |
| ENSG00000164778 | 24.90272038 | 0.672939833 | 5.154155747  | 0.001434054 | 0.00476447  | EN2        |
| ENSG00000213213 | 41.28394854 | 13.02296157 | 1.669457544  | 0.001438121 | 0.004777371 | CCDC183    |
| ENSG00000130255 | 4935.988015 | 9143.576921 | -0.889437602 | 0.00143881  | 0.004779048 | RPL36      |
| ENSG00000229272 | 11.98311364 | 0           | 5.915625431  | 0.001443471 | 0.004793476 | AL157388.1 |
| ENSG00000174891 | 205.4467791 | 349.411206  | -0.766101583 | 0.001443522 | 0.004793476 | RSRC1      |
| ENSG00000224043 | 75.49236474 | 27.61500301 | 1.450780176  | 0.001444562 | 0.004796317 | CCNT2-AS1  |
| ENSG00000105321 | 521.5083093 | 795.9343757 | -0.60968148  | 0.001446337 | 0.004801594 | CCDC9      |
| ENSG00000111012 | 4.821620823 | 23.41783872 | -2.272769925 | 0.001449787 | 0.004811967 | CYP27B1    |
| ENSG00000140932 | 8.223636224 | 0           | 5.372663198  | 0.001449832 | 0.004811967 | CMTM2      |
| ENSG00000284430 | 6.654133891 | 33.55421059 | -2.330022888 | 0.001450949 | 0.004814445 | AC020912.1 |
| ENSG00000250067 | 113.6054688 | 39.04038649 | 1.545248648  | 0.001450949 | 0.004814445 | YJEFN3     |
| ENSG00000239474 | 30.65643261 | 5.22754222  | 2.574207272  | 0.001453304 | 0.004821303 | KLHL41     |
| ENSG00000280286 | 24.70056932 | 2.241891306 | 3.489398092  | 0.001453561 | 0.004821303 | FRG1KP     |
| ENSG00000158985 | 735.5081902 | 351.4888198 | 1.064819485  | 0.001453573 | 0.004821303 | CDC42SE2   |
| ENSG00000259920 | 11.91763883 | 0.356539013 | 4.945680292  | 0.001454981 | 0.004825358 | AC007938.1 |
| ENSG00000166987 | 1086.516414 | 654.4412476 | 0.731579752  | 0.001455801 | 0.004827463 | MBD6       |
| ENSG00000126464 | 653.3814537 | 998.1338305 | -0.61115225  | 0.001458701 | 0.004836461 | PRR12      |
| ENSG00000135919 | 4767.508808 | 26026.76161 | -2.448701872 | 0.001459559 | 0.004838688 | SERPINE2   |
| ENSG00000254612 | 101.4474128 | 222.5620262 | -1.132871453 | 0.001463046 | 0.004849629 | AP001000.1 |
| ENSG00000117600 | 59.52934391 | 5.800264968 | 3.343584969  | 0.001463813 | 0.004851552 | PLPPR4     |
| ENSG00000246379 | 11.05177769 | 0           | 5.798817047  | 0.00146456  | 0.004853408 | AC040168.1 |
| ENSG00000167470 | 1056.211161 | 2251.077364 | -1.091655093 | 0.001466642 | 0.004859689 | MIDN       |
| ENSG00000070444 | 395.0954933 | 660.7013039 | -0.741314667 | 0.001468203 | 0.004864241 | MNT        |
| ENSG00000173726 | 3098.150069 | 4696.972969 | -0.600327129 | 0.001469998 | 0.004869568 | TOMM20     |
| ENSG00000188266 | 126.8231172 | 54.21807491 | 1.226662931  | 0.001470502 | 0.004870615 | HYKK       |
| ENSG00000188933 | 9.829779456 | 135.4801339 | -3.786258773 | 0.001471214 | 0.004872354 | USP32P1    |
| ENSG00000234585 | 129.5089831 | 51.2477412  | 1.338573919  | 0.00147236  | 0.004875526 | CCT6P3     |
| ENSG00000179456 | 310.000957  | 154.1095232 | 1.007518692  | 0.001472604 | 0.004875714 | ZBTB18     |
| ENSG00000165338 | 501.2972572 | 191.6683451 | 1.385746895  | 0.00147323  | 0.004877166 | HECTD2     |
| ENSG00000203721 | 1.539272221 | 29.69120447 | -4.276306248 | 0.001475001 | 0.004882406 | LINC00862  |
| ENSG00000231646 | 9.094511955 | 0           | 5.518578921  | 0.001475467 | 0.004883327 | FSIP2-AS1  |
| ENSG00000079482 | 322.8580398 | 146.1298388 | 1.144085319  | 0.001488577 | 0.004926087 | OPHN1      |
| ENSG00000179528 | 52.46646241 | 13.31227683 | 1.970041897  | 0.001489217 | 0.004927578 | LBX2       |
| ENSG00000189292 | 39.01646    | 2.587817834 | 3.927192453  | 0.001489993 | 0.004929517 | ALKAL2     |

|                 |             |             |              |             |             |            |
|-----------------|-------------|-------------|--------------|-------------|-------------|------------|
| ENSG00000196967 | 160.0790276 | 84.15511722 | 0.929810776  | 0.001492268 | 0.004936416 | ZNF585A    |
| ENSG00000139835 | 150.5426316 | 72.14644569 | 1.060398591  | 0.001493725 | 0.004940609 | GRTP1      |
| ENSG00000070729 | 0.293240848 | 16.04746641 | -5.620759283 | 0.001499294 | 0.004958394 | CNGB1      |
| ENSG00000006831 | 28.52337026 | 88.61374084 | -1.634283461 | 0.001503358 | 0.004971204 | ADIPOR2    |
| ENSG00000172638 | 2426.27929  | 5107.831851 | -1.074017811 | 0.001505615 | 0.004978031 | EFEMP2     |
| novel.584       | 268.5815163 | 43.1330957  | 2.641628574  | 0.001508491 | 0.004986907 | -          |
| ENSG00000167232 | 412.3972728 | 215.1865165 | 0.939192176  | 0.001511214 | 0.004995275 | ZNF91      |
| ENSG00000241489 | 49.27040246 | 8.803544832 | 2.493138169  | 0.00151206  | 0.004997286 | AC244197.3 |
| ENSG00000263786 | 2.082916045 | 18.17151168 | -3.114025236 | 0.001512208 | 0.004997286 | AC022211.1 |
| ENSG00000115590 | 0.616711807 | 15.43259769 | -4.665200476 | 0.00151262  | 0.004998012 | IL1R2      |
| ENSG00000180667 | 396.6698684 | 195.2115171 | 1.022827075  | 0.001514513 | 0.005003631 | YOD1       |
| ENSG00000188687 | 53.2967941  | 8.633663848 | 2.613784798  | 0.001514773 | 0.005003855 | SLC4A5     |
| ENSG00000260912 | 72.95065389 | 19.21275888 | 1.921973091  | 0.001522315 | 0.005028129 | AL158206.1 |
| ENSG00000167393 | 45.460494   | 6.490833752 | 2.810807523  | 0.001524094 | 0.005033366 | PPP2R3B    |
| ENSG00000085872 | 399.4010502 | 688.367246  | -0.785457565 | 0.001526373 | 0.005040251 | CHERP      |
| ENSG00000230712 | 3.355416585 | 27.14061796 | -3.023064622 | 0.001528498 | 0.005046627 | GGTLC4P    |
| ENSG00000227827 | 4.119233273 | 51.63110899 | -3.638241864 | 0.001529158 | 0.005048164 | AC138969.2 |
| ENSG00000108786 | 99.53241546 | 45.36963999 | 1.135163325  | 0.001531938 | 0.005056701 | HSD17B1    |
| ENSG00000163110 | 1067.61095  | 2412.47506  | -1.176282537 | 0.001533758 | 0.005062065 | PDLIM5     |
| ENSG00000108515 | 154.2018164 | 75.23488223 | 1.033656632  | 0.001534766 | 0.005064746 | ENO3       |
| ENSG00000286288 | 23.24385263 | 2.578361223 | 3.188797719  | 0.001535273 | 0.005065778 | AL109809.5 |
| ENSG00000233610 | 11.56490667 | 0           | 5.866964317  | 0.001538528 | 0.005075872 | LINC00462  |
| ENSG00000167461 | 344.9613372 | 611.4735509 | -0.826273155 | 0.001542369 | 0.005087409 | RAB8A      |
| ENSG00000162819 | 1131.699606 | 700.4996714 | 0.691857407  | 0.001542417 | 0.005087409 | BROX       |
| ENSG00000143748 | 256.3684561 | 419.6636132 | -0.711324268 | 0.001549721 | 0.005110854 | NVL        |
| ENSG00000141574 | 166.7151668 | 818.1651113 | -2.295204814 | 0.001556232 | 0.005131674 | SECTM1     |
| ENSG00000100418 | 1042.797273 | 1649.016123 | -0.661023031 | 0.001556978 | 0.005133484 | DES11      |
| ENSG00000178878 | 425.1630346 | 188.5425488 | 1.172305598  | 0.001557417 | 0.00513428  | APOLD1     |
| ENSG00000188338 | 79.70572042 | 4.880459818 | 4.040473704  | 0.001561399 | 0.005146753 | SLC38A3    |
| ENSG00000259250 | 83.24897261 | 21.11000793 | 1.97499612   | 0.001561905 | 0.005147769 | AC018904.1 |
| ENSG00000115268 | 7340.855268 | 11240.26638 | -0.614671313 | 0.001564045 | 0.005154167 | RPS15      |
| ENSG00000172081 | 924.669477  | 2690.893019 | -1.540983713 | 0.001564753 | 0.005155846 | MOB3A      |
| ENSG00000180773 | 249.9824901 | 471.9792891 | -0.916214829 | 0.001566859 | 0.005162131 | SLC36A4    |
| ENSG00000286760 | 35.65309459 | 9.955878399 | 1.835357427  | 0.001572824 | 0.005181127 | AL022069.3 |
| ENSG00000152240 | 296.2977321 | 497.1201892 | -0.747061204 | 0.001573643 | 0.005183126 | HAUS1      |
| ENSG00000182903 | 517.1066629 | 289.1893495 | 0.838193527  | 0.00157383  | 0.005183126 | ZNF721     |
| ENSG00000267787 | 60.53171091 | 21.58323711 | 1.495617099  | 0.001580564 | 0.005204641 | AC027097.2 |
| ENSG00000156170 | 371.4736496 | 181.4557596 | 1.032092494  | 0.001582254 | 0.005209549 | NDUFAF6    |
| ENSG00000286071 | 16.23942261 | 1.00940975  | 3.949188484  | 0.001584268 | 0.005215519 | AL136171.1 |
| ENSG00000167105 | 38.66491057 | 13.13635968 | 1.551582737  | 0.001584599 | 0.005215945 | TMEM92     |
| ENSG00000227345 | 312.6116898 | 533.5533651 | -0.771376025 | 0.001586173 | 0.005220467 | PARG       |
| ENSG00000108691 | 3280.284206 | 1636.355586 | 1.003273777  | 0.001587542 | 0.005224309 | CCL2       |
| ENSG00000186020 | 368.5166819 | 184.0372373 | 1.001724298  | 0.001590906 | 0.005234719 | ZNF529     |
| ENSG00000258634 | 172.5203232 | 86.49637371 | 0.995362519  | 0.001593364 | 0.00524214  | AL160006.1 |
| ENSG00000164484 | 64.86075934 | 402.8884403 | -2.635728478 | 0.001597805 | 0.005256087 | TMEM200A   |
| ENSG00000166135 | 884.5235047 | 1344.465813 | -0.604041801 | 0.00159851  | 0.005257739 | HIF1AN     |
| ENSG00000198108 | 53.66918519 | 246.9859479 | -2.203527592 | 0.001600864 | 0.005264815 | CHSY3      |
| ENSG00000242732 | 351.7843156 | 188.8566379 | 0.895975541  | 0.001602586 | 0.005269814 | RTL5       |
| ENSG00000285816 | 4.822874471 | 21.76629912 | -2.16846504  | 0.00160317  | 0.005271065 | AP000944.2 |
| ENSG00000136267 | 17.45926955 | 1.10029862  | 4.005300257  | 0.001604317 | 0.005274168 | DGKB       |
| ENSG00000279673 | 11.04300215 | 0           | 5.797766681  | 0.001611636 | 0.005297561 | AC092919.2 |

|                 |             |             |              |             |             |            |
|-----------------|-------------|-------------|--------------|-------------|-------------|------------|
| ENSG00000119703 | 53.42036404 | 16.60012006 | 1.688786682  | 0.00161383  | 0.005304101 | ZC2HC1C    |
| ENSG00000133424 | 548.946061  | 189.787685  | 1.533447664  | 0.001614691 | 0.005306258 | LARGE1     |
| ENSG00000159479 | 558.5683584 | 910.2670392 | -0.704650663 | 0.001616432 | 0.005310869 | MED8       |
| ENSG00000162144 | 627.2883451 | 1139.280566 | -0.860982176 | 0.001616503 | 0.005310869 | CYB561A3   |
| ENSG00000204869 | 25.7667584  | 3.005720009 | 3.128068169  | 0.001618843 | 0.005317886 | IGFL4      |
| ENSG00000174547 | 538.8081506 | 901.90254   | -0.743493514 | 0.001621103 | 0.005324638 | MRPL11     |
| ENSG00000226862 | 8.67784336  | 0           | 5.452521459  | 0.001621488 | 0.005325227 | AC104463.2 |
| ENSG00000221817 | 149.5249357 | 59.98085144 | 1.315482246  | 0.001622939 | 0.00532932  | PPP3CB-AS1 |
| ENSG00000133027 | 228.2431632 | 368.8736555 | -0.693027556 | 0.001626216 | 0.005339406 | PEMT       |
| ENSG00000109534 | 363.8480908 | 694.621921  | -0.933383308 | 0.001628636 | 0.005346676 | GAR1       |
| ENSG00000249604 | 15.37990099 | 1.029478846 | 3.858999056  | 0.001629301 | 0.005348184 | AC096564.2 |
| ENSG00000284722 | 9.735256902 | 0           | 5.616481865  | 0.001633251 | 0.00536047  | AP003175.1 |
| novel.174       | 27.67491802 | 4.952563861 | 2.474438708  | 0.001634041 | 0.005362387 | -          |
| ENSG00000115232 | 448.291295  | 1154.280002 | -1.364778534 | 0.00163707  | 0.005371648 | ITGA4      |
| ENSG00000141429 | 1038.589027 | 2514.501157 | -1.275791036 | 0.001637991 | 0.005373993 | GALNT1     |
| ENSG00000137843 | 21.41510051 | 1.834601616 | 3.560541016  | 0.001641316 | 0.005384221 | PAK6       |
| ENSG00000186522 | 2726.465284 | 1675.893098 | 0.702132184  | 0.001647667 | 0.005403845 | SEPT10     |
| ENSG00000206341 | 43.06101563 | 1.110911105 | 5.294628675  | 0.001647714 | 0.005403845 | HLA-H      |
| ENSG00000168807 | 763.3387915 | 1199.697731 | -0.652549446 | 0.001648266 | 0.005404974 | SNTB2      |
| ENSG00000147654 | 428.3198762 | 221.0476439 | 0.953048409  | 0.001649735 | 0.005409109 | EBAG9      |
| ENSG00000102755 | 347.1285053 | 125.0939555 | 1.470583185  | 0.001650546 | 0.005411084 | FLT1       |
| ENSG00000159263 | 35.88211427 | 11.88252476 | 1.597374622  | 0.001656741 | 0.005430708 | SIM2       |
| ENSG00000117477 | 88.21415048 | 35.06796346 | 1.32977296   | 0.001657542 | 0.005432648 | CCDC181    |
| ENSG00000184068 | 90.20727418 | 34.65121716 | 1.379761199  | 0.001662876 | 0.005449443 | SREBF2-AS1 |
| ENSG00000069431 | 83.32511665 | 9.793013881 | 3.082819262  | 0.001667449 | 0.005463741 | ABCC9      |
| ENSG00000232229 | 46.51535681 | 8.86734814  | 2.386036844  | 0.001677974 | 0.005497534 | LINC00865  |
| ENSG00000284946 | 11.84177881 | 82.25915244 | -2.792010142 | 0.001684249 | 0.005517398 | AC068831.7 |
| ENSG00000145864 | 7.843465986 | 0           | 5.305759421  | 0.001685929 | 0.005522204 | GABRB2     |
| ENSG00000109743 | 279.1084814 | 81.00014608 | 1.782419574  | 0.001688057 | 0.005528478 | BST1       |
| ENSG00000171103 | 128.7922356 | 230.2910393 | -0.838412846 | 0.001690649 | 0.005536268 | TRMT61B    |
| ENSG00000166831 | 70.10008894 | 16.00159602 | 2.128120568  | 0.001691141 | 0.005537181 | RBPMS2     |
| ENSG00000186675 | 7.912773023 | 0           | 5.317168069  | 0.001691545 | 0.005537807 | MAGEE2     |
| ENSG00000196235 | 2293.412893 | 3598.850598 | -0.64994163  | 0.001692615 | 0.005540611 | SUPT5H     |
| ENSG00000087266 | 2915.928642 | 1106.015131 | 1.39868206   | 0.001700359 | 0.005565258 | SH3BP2     |
| ENSG00000105472 | 806.4045989 | 4298.836994 | -2.414415284 | 0.001705186 | 0.005580353 | CLEC11A    |
| ENSG00000197496 | 408.1367868 | 1160.617682 | -1.507851592 | 0.001712946 | 0.005605044 | SLC2A10    |
| ENSG00000047849 | 13821.65141 | 9429.261417 | 0.551731835  | 0.001714021 | 0.005607855 | MAP4       |
| ENSG00000055955 | 14.71275815 | 0.713078025 | 4.360245701  | 0.001716313 | 0.005614646 | ITIH4      |
| ENSG00000141293 | 34.99411438 | 3.689272328 | 3.258103488  | 0.001716829 | 0.005615627 | SKAP1      |
| ENSG00000273729 | 38.83117618 | 13.07486812 | 1.576808624  | 0.001717777 | 0.005618023 | AC007686.3 |
| ENSG00000110107 | 1353.70402  | 2305.238224 | -0.768146583 | 0.001718619 | 0.00562007  | PRPF19     |
| ENSG00000142856 | 215.4579114 | 398.1737051 | -0.886126226 | 0.001720119 | 0.005624264 | ITGB3BP    |
| ENSG00000204971 | 12.88672678 | 0           | 6.020758699  | 0.001722542 | 0.00563148  | AP000812.1 |
| ENSG00000123415 | 348.7409168 | 542.3463446 | -0.636860765 | 0.00172397  | 0.00563544  | SMUG1      |
| ENSG00000280099 | 82.9594927  | 14.40440311 | 2.51610323   | 0.001726895 | 0.00564429  | AL603750.1 |
| novel.130       | 96.83188962 | 41.94357766 | 1.209046106  | 0.001727659 | 0.005646075 | -          |
| ENSG00000078140 | 1331.396733 | 1928.465602 | -0.534486139 | 0.001728065 | 0.005646692 | UBE2K      |
| ENSG00000103932 | 424.0286235 | 755.3417205 | -0.832650054 | 0.001732985 | 0.005662059 | RPAP1      |
| ENSG00000149256 | 206.3800797 | 66.17167624 | 1.639711899  | 0.001735219 | 0.005668643 | TENM4      |
| ENSG00000213096 | 280.0529392 | 141.4493464 | 0.983879325  | 0.001736996 | 0.005673736 | ZNF254     |
| ENSG0000015520  | 8.202252925 | 0           | 5.369306661  | 0.001737337 | 0.005674136 | NPC1L1     |

|                 |             |             |              |             |             |            |
|-----------------|-------------|-------------|--------------|-------------|-------------|------------|
| ENSG00000270441 | 55.31820974 | 16.11011384 | 1.787964982  | 0.001742687 | 0.005690893 | AC135506.1 |
| ENSG00000251365 | 8.117830831 | 0           | 5.355786118  | 0.001743373 | 0.00569242  | LINC02236  |
| ENSG00000175164 | 8.233736686 | 0           | 5.374328036  | 0.001745559 | 0.005698251 | ABO        |
| ENSG00000249574 | 8.238751281 | 0           | 5.375123451  | 0.001745598 | 0.005698251 | AC226118.1 |
| ENSG00000225793 | 37.4352479  | 10.53908524 | 1.818030263  | 0.001747776 | 0.005704362 | AL080250.1 |
| ENSG00000104529 | 52.77370686 | 122.1308954 | -1.210810148 | 0.001747909 | 0.005704362 | EEF1D      |
| ENSG00000134444 | 895.5363918 | 546.3576212 | 0.712773509  | 0.001749075 | 0.005707451 | RELCH      |
| novel.586       | 34.76996711 | 8.978306106 | 1.952542147  | 0.001750735 | 0.00571215  | -          |
| ENSG00000225963 | 36.99114122 | 10.18254623 | 1.849524002  | 0.001751456 | 0.005713784 | AC009950.1 |
| ENSG00000204778 | 85.80698054 | 28.8804779  | 1.573440982  | 0.001753719 | 0.005720447 | CBWD4P     |
| ENSG00000111142 | 1054.13471  | 1888.488333 | -0.841373852 | 0.001756113 | 0.005727538 | METAP2     |
| ENSG00000100302 | 16.35901814 | 71.40957415 | -2.125824429 | 0.001759651 | 0.005738357 | RASD2      |
| ENSG00000147649 | 1825.36291  | 3000.667939 | -0.717210445 | 0.001760163 | 0.005739308 | MTDH       |
| ENSG00000276916 | 3.912921816 | 18.87397722 | -2.26819173  | 0.001761468 | 0.005742841 | AL442125.2 |
| ENSG00000089248 | 1608.542747 | 2707.560827 | -0.751249946 | 0.001763372 | 0.005748328 | ERP29      |
| ENSG00000083067 | 134.7798247 | 27.8888255  | 2.273859729  | 0.001764535 | 0.005751397 | TRPM3      |
| ENSG00000060642 | 193.7333004 | 383.9990394 | -0.986569746 | 0.001766989 | 0.005758675 | PIGV       |
| ENSG00000112992 | 589.9971688 | 1116.528966 | -0.920543546 | 0.001771123 | 0.005771421 | NNT        |
| ENSG00000196071 | 8.558461294 | 0           | 5.429920424  | 0.001772196 | 0.005774193 | OR2L13     |
| ENSG00000169962 | 27.74666108 | 5.685710982 | 2.281120139  | 0.00177943  | 0.005797038 | TAS1R3     |
| ENSG00000114923 | 862.8996734 | 344.2728704 | 1.32640099   | 0.001780612 | 0.00580016  | SLC4A3     |
| ENSG00000137710 | 3506.091937 | 2123.745498 | 0.723215569  | 0.001781605 | 0.005802445 | RDX        |
| ENSG00000172037 | 6914.287817 | 11336.93854 | -0.713355436 | 0.00178176  | 0.005802445 | LAMB2      |
| ENSG00000184465 | 263.1292931 | 536.9162536 | -1.028261981 | 0.001785148 | 0.005812751 | WDR27      |
| ENSG00000233381 | 1.232169966 | 13.57433095 | -3.47767836  | 0.00178566  | 0.005813689 | AK4P3      |
| ENSG00000170209 | 14.98329077 | 0.672939833 | 4.412119338  | 0.001785967 | 0.005813958 | ANKK1      |
| ENSG00000180616 | 83.875456   | 10.7941229  | 2.951236755  | 0.001786901 | 0.005816272 | SSTR2      |
| ENSG00000163958 | 9.764233365 | 0           | 5.620502043  | 0.001789261 | 0.005823222 | ZDHHC19    |
| ENSG00000198648 | 371.8872967 | 776.7446522 | -1.06303506  | 0.001790758 | 0.005827366 | STK39      |
| ENSG00000254332 | 10.29394451 | 39.99776129 | -1.954668094 | 0.001792091 | 0.005830971 | AF201337.1 |
| ENSG00000269950 | 8.432454979 | 0           | 5.410354616  | 0.001796319 | 0.005843997 | AP000962.1 |
| ENSG00000222881 | 0           | 7.868550876 | -5.5576467   | 0.001798261 | 0.005849584 | RF00019    |
| ENSG00000171530 | 1380.829225 | 2268.855214 | -0.716465644 | 0.00180222  | 0.005861728 | TBCA       |
| ENSG00000142748 | 23.3105811  | 1.722487775 | 3.729346207  | 0.001802499 | 0.005861901 | FCN3       |
| ENSG00000066230 | 510.5932706 | 109.7094931 | 2.219347982  | 0.001803347 | 0.005863831 | SLC9A3     |
| ENSG00000272950 | 14.70140404 | 0.774441189 | 4.324770397  | 0.001803694 | 0.005863831 | AC093799.1 |
| ENSG00000287917 | 18.47599651 | 53.35847705 | -1.528120431 | 0.00180377  | 0.005863831 | AP000944.4 |
| ENSG00000135046 | 15518.00598 | 6573.762089 | 1.239113989  | 0.001806259 | 0.00587119  | ANXA1      |
| ENSG00000000457 | 265.4536231 | 144.9552999 | 0.87265201   | 0.001806843 | 0.005872352 | SCYL3      |
| ENSG00000111231 | 410.0774161 | 656.9827758 | -0.679854344 | 0.001808267 | 0.005876246 | GPN3       |
| ENSG00000091140 | 964.7062261 | 1697.390049 | -0.815266858 | 0.001813911 | 0.005893851 | DLD        |
| ENSG00000107679 | 1236.808276 | 586.0584088 | 1.077644856  | 0.001816924 | 0.005902903 | PLEKHA1    |
| ENSG00000198356 | 1156.801913 | 1891.896066 | -0.709744466 | 0.001817961 | 0.005905531 | ASNA1      |
| ENSG00000160688 | 423.1981771 | 714.8588932 | -0.756708435 | 0.001821888 | 0.00591755  | FLAD1      |
| ENSG00000232472 | 462.5471246 | 916.7284757 | -0.987130959 | 0.001822865 | 0.005919984 | EEF1B2P3   |
| ENSG00000214578 | 23.04993512 | 0.713078025 | 5.00716287   | 0.001827433 | 0.005934074 | HMG2P15    |
| ENSG00000175147 | 21.0990089  | 1.447381022 | 3.871497214  | 0.001831872 | 0.005947746 | TMEM51-AS1 |
| ENSG00000225791 | 248.4870243 | 139.7738037 | 0.82886715   | 0.001832608 | 0.005949393 | TRAM2-AS1  |
| ENSG00000225630 | 3016.393104 | 1855.543384 | 0.701032537  | 0.001833076 | 0.00595017  | MTND2P28   |
| ENSG00000009724 | 97.83250513 | 27.97629392 | 1.803894634  | 0.001833842 | 0.005951911 | MASP2      |
| ENSG00000287901 | 10.74843638 | 0           | 5.758657993  | 0.001834929 | 0.005954694 | AL137026.3 |

|                 |             |             |              |             |             |            |
|-----------------|-------------|-------------|--------------|-------------|-------------|------------|
| ENSG00000261616 | 35.11041968 | 8.703199352 | 2.019015851  | 0.001837425 | 0.00596205  | AC036108.3 |
| ENSG00000086200 | 274.2433114 | 570.6086614 | -1.057497852 | 0.001838643 | 0.005964748 | IPO11      |
| ENSG00000272123 | 10.80234363 | 0.336469917 | 4.806632319  | 0.001838715 | 0.005964748 | AC008966.2 |
| ENSG00000241666 | 10.63127688 | 0.336469917 | 4.781647765  | 0.001842639 | 0.00597673  | AL031733.2 |
| ENSG00000277778 | 88.71098237 | 24.63294812 | 1.844231729  | 0.001845546 | 0.005985412 | PGM5P2     |
| ENSG00000141447 | 1554.726187 | 673.9480046 | 1.205553781  | 0.001849303 | 0.005996127 | OSBPL1A    |
| ENSG00000277159 | 26.00129087 | 3.149799701 | 3.029726642  | 0.001849312 | 0.005996127 | AL139384.2 |
| ENSG00000163866 | 524.1098237 | 863.7392048 | -0.721099174 | 0.001851403 | 0.006001859 | SMIM12     |
| ENSG00000143429 | 54.03395599 | 163.5527577 | -1.598063648 | 0.001851542 | 0.006001859 | LSP1P4     |
| ENSG00000105641 | 26.77431037 | 0.336469917 | 6.1142776    | 0.001853332 | 0.006006914 | SLC5A5     |
| ENSG00000124587 | 453.8366596 | 1154.240573 | -1.346479793 | 0.001855647 | 0.006013666 | PEX6       |
| ENSG00000236266 | 10.53557195 | 0.336469917 | 4.770106263  | 0.001859429 | 0.00602517  | Z98884.1   |
| ENSG00000175104 | 390.7512151 | 235.1205729 | 0.733522198  | 0.001864525 | 0.006040859 | TRAF6      |
| ENSG00000284428 | 42.55616435 | 10.70079388 | 1.990181606  | 0.001864735 | 0.006040859 | AC092329.4 |
| ENSG00000198324 | 180.2990973 | 349.9781025 | -0.956366687 | 0.001865773 | 0.006043466 | PHETA1     |
| ENSG00000144550 | 7.54897149  | 0           | 5.250424069  | 0.001866528 | 0.006044534 | CPNE9      |
| ENSG00000131885 | 10.2850977  | 0           | 5.696287976  | 0.001866568 | 0.006044534 | KRT17P1    |
| ENSG00000103472 | 14.23716771 | 0.672939833 | 4.335943119  | 0.001868134 | 0.006048854 | RRN3P2     |
| ENSG00000108799 | 1431.530449 | 802.8239288 | 0.834814158  | 0.001868661 | 0.006049804 | EZH1       |
| ENSG00000090659 | 9.190288158 | 0           | 5.532608345  | 0.001870506 | 0.006055024 | CD209      |
| ENSG00000254427 | 20.45568573 | 2.038888596 | 3.287947525  | 0.001871475 | 0.006057406 | AC103736.1 |
| ENSG00000240342 | 1808.701746 | 7893.403361 | -2.125715945 | 0.001872321 | 0.00605939  | RPS2P5     |
| ENSG00000104889 | 0.601596751 | 11.61931476 | -4.268735586 | 0.001873619 | 0.006062835 | RNASEH2A   |
| ENSG00000119787 | 449.9613469 | 692.1315633 | -0.621379529 | 0.001877689 | 0.006075246 | ATL2       |
| ENSG00000177791 | 28.6354439  | 4.159209451 | 2.764026677  | 0.00187968  | 0.006080931 | MYOZ1      |
| ENSG00000188827 | 202.4530558 | 332.6378186 | -0.715946221 | 0.001882853 | 0.006090438 | SLX4       |
| ENSG00000226833 | 59.71334624 | 17.88592083 | 1.731298876  | 0.001884679 | 0.006094918 | AC092164.1 |
| ENSG00000170561 | 18.96197214 | 1.00940975  | 4.176861583  | 0.001884707 | 0.006094918 | IRX2       |
| ENSG00000272842 | 22.13357203 | 3.53586442  | 2.635323225  | 0.001892827 | 0.006120417 | AL391834.1 |
| ENSG00000144029 | 892.7171966 | 1465.072343 | -0.714505162 | 0.001893942 | 0.006123259 | MRPS5      |
| novel.855       | 38.28130756 | 2.140389951 | 4.15896486   | 0.001895764 | 0.006128387 | -          |
| ENSG00000120694 | 1043.446363 | 1971.742207 | -0.918284085 | 0.001896803 | 0.006130722 | HSPH1      |
| ENSG00000204791 | 20.91415201 | 0.743759607 | 4.842944524  | 0.001896958 | 0.006130722 | SMPD5      |
| ENSG00000198301 | 461.9434638 | 703.4351664 | -0.606986755 | 0.00189774  | 0.006132486 | SDAD1      |
| ENSG00000268751 | 18.24203351 | 1.90542139  | 3.305051984  | 0.001898653 | 0.006134671 | SCGB1B2P   |
| ENSG00000073614 | 693.1817461 | 1096.374544 | -0.661365204 | 0.001903346 | 0.006149071 | KDM5A      |
| ENSG00000197008 | 125.5775131 | 65.02995515 | 0.948407469  | 0.001903786 | 0.006149727 | ZNF138     |
| ENSG00000253944 | 12.84618275 | 0.387220594 | 5.056633795  | 0.001904233 | 0.006150408 | AC027117.2 |
| ENSG00000144815 | 1590.972367 | 835.3590628 | 0.929581157  | 0.001906099 | 0.006155669 | NXPE3      |
| novel.93        | 17.07283107 | 1.161661783 | 3.942179078  | 0.001907359 | 0.006158972 | -          |
| ENSG00000063177 | 8439.113589 | 13673.55719 | -0.696231175 | 0.001913338 | 0.006177512 | RPL18      |
| ENSG00000133661 | 23.37458881 | 2.792104814 | 3.046768463  | 0.001915027 | 0.006182098 | SFTPD      |
| ENSG00000121297 | 210.3800894 | 495.9432318 | -1.236560481 | 0.001915235 | 0.006182098 | TSHZ3      |
| ENSG00000156140 | 13.55386963 | 116.1954122 | -3.102227818 | 0.001917844 | 0.006189753 | ADAMTS3    |
| ENSG00000183888 | 8.860548954 | 0           | 5.480115935  | 0.001920573 | 0.006197791 | SRARP      |
| ENSG00000131470 | 85.81973084 | 222.0499428 | -1.370936593 | 0.0019327   | 0.006236151 | PSMC3IP    |
| ENSG00000129925 | 1129.682206 | 1819.42967  | -0.687720839 | 0.001935316 | 0.006243692 | TMEM8A     |
| ENSG00000141504 | 1271.09645  | 752.2337291 | 0.757273293  | 0.001935518 | 0.006243692 | SAT2       |
| ENSG00000254676 | 17.27788888 | 3.220619475 | 2.420979357  | 0.001937223 | 0.006248417 | AP000873.4 |
| ENSG00000230838 | 0.293240848 | 9.293551051 | -4.836553113 | 0.001944569 | 0.00627133  | LINC01614  |
| ENSG00000123388 | 0           | 17.18473956 | -6.685906138 | 0.001948741 | 0.006284008 | HOXC11     |

|                 |             |             |              |             |             |            |
|-----------------|-------------|-------------|--------------|-------------|-------------|------------|
| ENSG00000261857 | 16.32481362 | 0.336469917 | 5.402235357  | 0.001949703 | 0.006286327 | MIA        |
| ENSG00000287439 | 9.139857123 | 0           | 5.525245682  | 0.001951265 | 0.006290585 | AC092078.3 |
| ENSG00000110066 | 1022.16626  | 661.5832827 | 0.628012002  | 0.001952934 | 0.006294544 | KMT5B      |
| ENSG00000137494 | 171.768501  | 331.2478195 | -0.947522977 | 0.001952978 | 0.006294544 | ANKRD42    |
| ENSG00000170425 | 109.5467229 | 452.773757  | -2.047351235 | 0.001953661 | 0.006295964 | ADORA2B    |
| ENSG00000083857 | 3103.502172 | 5327.160037 | -0.779508498 | 0.001954512 | 0.006297925 | FAT1       |
| ENSG00000174842 | 126.0524194 | 243.7219798 | -0.952454133 | 0.001955601 | 0.006299872 | GLMN       |
| ENSG00000137266 | 235.9434984 | 111.3922279 | 1.083772529  | 0.001955601 | 0.006299872 | SLC22A23   |
| ENSG00000274225 | 29.80031593 | 4.402350354 | 2.772005209  | 0.001956394 | 0.006301647 | AP001065.1 |
| ENSG00000166796 | 0.308355904 | 14.75978625 | -5.506623807 | 0.001964467 | 0.006326866 | LDHC       |
| ENSG00000064687 | 486.240711  | 193.427037  | 1.328685654  | 0.001965413 | 0.006329125 | ABCA7      |
| ENSG00000159720 | 900.3563985 | 1697.522639 | -0.914912005 | 0.001966167 | 0.006330772 | ATP6V0D1   |
| ENSG00000160932 | 155.8342428 | 415.4350781 | -1.415054884 | 0.001968285 | 0.006336805 | LY6E       |
| ENSG00000285881 | 3.033199274 | 28.13286548 | -3.210463943 | 0.001968657 | 0.006337217 | AC105206.3 |
| ENSG00000175224 | 1019.422481 | 1820.730797 | -0.836753733 | 0.001970749 | 0.006343164 | ATG13      |
| ENSG00000179119 | 371.6127897 | 676.6525817 | -0.864814367 | 0.001971622 | 0.006345191 | SPTY2D1    |
| ENSG00000165410 | 1661.810255 | 2626.158412 | -0.660210732 | 0.001972735 | 0.006347985 | CFL2       |
| ENSG00000081386 | 272.3541421 | 160.0239098 | 0.768131111  | 0.001975895 | 0.006357364 | ZNF510     |
| ENSG00000116191 | 345.6608622 | 685.1436472 | -0.986671278 | 0.001977551 | 0.006361472 | RALGPS2    |
| ENSG00000183621 | 263.9820479 | 116.3031125 | 1.184672192  | 0.001977661 | 0.006361472 | ZNF438     |
| ENSG00000267058 | 3.665026137 | 20.87961569 | -2.511580855 | 0.001982321 | 0.006375674 | AC006213.2 |
| ENSG00000257681 | 30.96765182 | 6.65498254  | 2.20448829   | 0.001982732 | 0.006376206 | AC025265.1 |
| ENSG00000156050 | 204.739377  | 84.80854872 | 1.268593084  | 0.001985348 | 0.006383829 | FAM161B    |
| ENSG00000272476 | 5.515161559 | 31.99270795 | -2.543775832 | 0.001987628 | 0.006390367 | AL024507.2 |
| ENSG00000260565 | 409.0253175 | 179.7912486 | 1.185049399  | 0.001988655 | 0.006392877 | ERVK13-1   |
| ENSG00000179111 | 4.597687012 | 28.86858114 | -2.654053955 | 0.00199119  | 0.006400237 | HES7       |
| novel.315       | 9.931396626 | 0           | 5.646267288  | 0.00199424  | 0.006409246 | -          |
| ENSG00000186364 | 104.4348396 | 51.5795064  | 1.017154639  | 0.001996088 | 0.006414393 | NUDT17     |
| ENSG00000183087 | 2241.371465 | 4862.266953 | -1.117266325 | 0.001999711 | 0.006425239 | GAS6       |
| ENSG00000146232 | 523.5993445 | 262.0120141 | 0.999838884  | 0.002002362 | 0.006432961 | NFKBIE     |
| ENSG00000286451 | 9.260564109 | 0           | 5.546209091  | 0.002002775 | 0.006433494 | AL499602.1 |
| ENSG00000163516 | 821.8183463 | 2046.361316 | -1.315980903 | 0.002006309 | 0.006444051 | ANKZF1     |
| ENSG00000177888 | 538.0887543 | 315.7327621 | 0.769796011  | 0.002006958 | 0.006445336 | ZBTB41     |
| ENSG00000232034 | 0           | 8.834354808 | -5.726248452 | 0.002007773 | 0.006447158 | AC092168.2 |
| ENSG00000110651 | 15596.8314  | 9671.78348  | 0.689424816  | 0.002008362 | 0.006448253 | CD81       |
| ENSG00000229425 | 14.74201934 | 0.356539013 | 5.252688238  | 0.002011729 | 0.006458265 | AJ009632.2 |
| ENSG00000169239 | 198.9227685 | 89.1123858  | 1.159805186  | 0.002012438 | 0.006459741 | CA5B       |
| ENSG00000140682 | 979.7461784 | 2145.004771 | -1.130377008 | 0.002016165 | 0.006470906 | TGFB11     |
| ENSG00000272325 | 308.4365409 | 158.515598  | 0.959082437  | 0.002019138 | 0.006479646 | NUDT3      |
| ENSG00000198429 | 115.7562523 | 47.81607507 | 1.271754719  | 0.002020574 | 0.006483455 | ZNF69      |
| ENSG00000261061 | 53.12977303 | 115.6758803 | -1.12345497  | 0.002021146 | 0.006484449 | AC092718.4 |
| ENSG00000263004 | 39.30962992 | 7.765765251 | 2.352088649  | 0.002021486 | 0.006484779 | AC007114.1 |
| ENSG00000117122 | 124.2591529 | 755.5526862 | -2.604467368 | 0.002022641 | 0.006487683 | MFAP2      |
| ENSG00000178252 | 1872.402215 | 3089.803126 | -0.722604642 | 0.00202641  | 0.006498969 | WDR6       |
| ENSG00000286367 | 0.615458159 | 10.90379659 | -4.161476904 | 0.002027992 | 0.00650324  | AC000072.1 |
| ENSG00000146085 | 630.7107912 | 976.8955996 | -0.631475084 | 0.00203127  | 0.00651295  | MMUT       |
| ENSG00000284691 | 183.8500844 | 82.19637661 | 1.163971145  | 0.002033493 | 0.006519271 | AC073111.4 |
| ENSG00000165996 | 151.6690674 | 281.6305685 | -0.892095204 | 0.002035173 | 0.006523854 | HACD1      |
| ENSG00000132466 | 1339.97249  | 2088.340876 | -0.640156891 | 0.002037575 | 0.006530746 | ANKRD17    |
| ENSG00000229771 | 1.845120827 | 15.85636045 | -3.114197121 | 0.002040358 | 0.006538861 | AL035665.1 |
| ENSG00000117475 | 462.2805392 | 715.0986821 | -0.629609267 | 0.002040898 | 0.006539783 | BLZF1      |

|                 |             |             |              |             |             |            |
|-----------------|-------------|-------------|--------------|-------------|-------------|------------|
| ENSG00000286315 | 18.95549044 | 1.834601616 | 3.386984075  | 0.002041316 | 0.006540318 | AC087175.1 |
| ENSG00000142687 | 1002.849404 | 1505.588514 | -0.586028735 | 0.002042363 | 0.006541741 | KIAA0319L  |
| ENSG00000129696 | 94.73016884 | 191.7243144 | -1.018770741 | 0.002042418 | 0.006541741 | TTI2       |
| ENSG00000272375 | 14.8500473  | 2.10970837  | 2.796678643  | 0.002042516 | 0.006541741 | AC026979.3 |
| ENSG00000100170 | 10.10901635 | 0           | 5.670294298  | 0.002043074 | 0.006542721 | SLC5A1     |
| ENSG00000163882 | 672.2904452 | 1118.428421 | -0.734142629 | 0.002044051 | 0.006544455 | POLR2H     |
| ENSG00000167693 | 226.3400022 | 738.1170655 | -1.705647172 | 0.002044119 | 0.006544455 | NXN        |
| ENSG00000276710 | 6.636511537 | 25.02949693 | -1.913957724 | 0.002044476 | 0.006544791 | CSPG4P10   |
| ENSG00000135503 | 402.4152588 | 670.210572  | -0.73605018  | 0.002044801 | 0.006545027 | ACVVR1B    |
| ENSG00000183844 | 10.08519703 | 0           | 5.667099157  | 0.002047802 | 0.006553824 | FAM3B      |
| ENSG00000159921 | 565.2283051 | 900.588729  | -0.67167485  | 0.002050535 | 0.006561762 | GNE        |
| ENSG00000253731 | 33.89873537 | 70.36973961 | -1.054951685 | 0.002051013 | 0.006562484 | PCDHGA6    |
| ENSG00000083444 | 3794.598415 | 11150.90116 | -1.555145467 | 0.002055282 | 0.006575208 | PLOD1      |
| ENSG00000133026 | 1238.267246 | 2931.262107 | -1.243268183 | 0.002055496 | 0.006575208 | MYH10      |
| ENSG00000165282 | 551.526789  | 897.6058818 | -0.7029416   | 0.002058127 | 0.006582147 | PIGO       |
| ENSG00000128917 | 198.2122896 | 23.06818778 | 3.107713971  | 0.002058172 | 0.006582147 | DLL4       |
| ENSG00000188761 | 32.21171753 | 4.566499142 | 2.809436905  | 0.002060895 | 0.006590045 | BCL2L15    |
| ENSG00000067066 | 1710.365687 | 2833.466849 | -0.728197829 | 0.002061377 | 0.006590773 | SP100      |
| ENSG00000005238 | 606.4511089 | 1305.084376 | -1.105439718 | 0.002061864 | 0.006590959 | FAM214B    |
| ENSG00000267554 | 8.144299997 | 0           | 5.360006513  | 0.002061942 | 0.006590959 | AC015911.8 |
| ENSG00000146469 | 8.13043859  | 0           | 5.357769907  | 0.002062421 | 0.006591678 | VIP        |
| ENSG00000237324 | 10.03978059 | 0.356539013 | 4.698732227  | 0.002063367 | 0.006593892 | AC093158.1 |
| ENSG00000184860 | 5.821010166 | 31.36221806 | -2.437171214 | 0.002063923 | 0.006594357 | SDR42E1    |
| ENSG00000230479 | 1.803536605 | 20.82642487 | -3.521445894 | 0.00206402  | 0.006594357 | AP000695.1 |
| ENSG00000185347 | 176.8974379 | 394.5818373 | -1.158276735 | 0.002066407 | 0.006601169 | TEDC1      |
| ENSG00000198718 | 413.9144066 | 228.5101765 | 0.858217206  | 0.002074202 | 0.006625256 | TOGARAM1   |
| ENSG00000108669 | 1128.275992 | 647.6506148 | 0.801116152  | 0.002075142 | 0.006627085 | CYTH1      |
| ENSG00000258366 | 16.83600477 | 50.55473227 | -1.582630151 | 0.002075285 | 0.006627085 | RTEL1      |
| ENSG00000121892 | 1540.734738 | 2196.55705  | -0.511585206 | 0.002078862 | 0.006637694 | PDS5A      |
| ENSG00000011114 | 21.7911538  | 55.13898876 | -1.338348251 | 0.002080546 | 0.006642255 | BTBD7      |
| ENSG00000158941 | 1315.309331 | 1917.451164 | -0.543847305 | 0.002080831 | 0.006642348 | CCAR2      |
| ENSG00000129968 | 3169.578248 | 2171.418629 | 0.545644374  | 0.002081492 | 0.006643642 | ABHD17A    |
| novel.810       | 13.02387375 | 42.10990981 | -1.690925881 | 0.002083405 | 0.006648931 | -          |
| ENSG00000084652 | 1526.38635  | 2309.498023 | -0.597569796 | 0.002087235 | 0.006660334 | TXLNA      |
| ENSG00000153233 | 5.497539206 | 23.4486487  | -2.096683892 | 0.002089833 | 0.006667808 | PTPRR      |
| ENSG00000176678 | 99.2406921  | 627.117747  | -2.660244257 | 0.002092485 | 0.006675448 | FOXL1      |
| ENSG00000269694 | 10.78722857 | 0.387220594 | 4.804751754  | 0.002092918 | 0.006676009 | AC005197.1 |
| ENSG00000165821 | 293.0981528 | 152.5448913 | 0.942573969  | 0.002093887 | 0.006678029 | SALL2      |
| ENSG00000131019 | 29.65879511 | 104.1890868 | -1.81315944  | 0.002094065 | 0.006678029 | ULBP3      |
| ENSG00000001497 | 863.4941317 | 1428.471854 | -0.72618589  | 0.002094911 | 0.006679907 | LAS1L      |
| ENSG00000122694 | 943.7711732 | 407.1375334 | 1.21345794   | 0.002095964 | 0.006682445 | GLIPR2     |
| ENSG00000264176 | 18.94531871 | 2.833398881 | 2.732617768  | 0.002098927 | 0.006691072 | MAGOH2P    |
| ENSG00000169871 | 1484.75081  | 2629.502999 | -0.824484409 | 0.002103043 | 0.00670337  | TRIM56     |
| ENSG00000257150 | 8.092615314 | 0           | 5.351644214  | 0.002104561 | 0.006706935 | PGAM1P5    |
| ENSG00000259846 | 8.090108017 | 0           | 5.35123988   | 0.002104678 | 0.006706935 | AC092131.1 |
| ENSG00000261504 | 10.04103424 | 0.387220594 | 4.698897639  | 0.002105592 | 0.006709026 | LINC01686  |
| ENSG00000143252 | 1396.921799 | 2177.488641 | -0.640494905 | 0.002107166 | 0.006712803 | SDHC       |
| ENSG00000174938 | 276.6401674 | 1025.219842 | -1.889748707 | 0.002107295 | 0.006712803 | SEZ6L2     |
| ENSG00000164619 | 32.98251447 | 172.882115  | -2.389091738 | 0.002109726 | 0.006719726 | BMPER      |
| ENSG00000182809 | 2867.223354 | 1487.616379 | 0.946522299  | 0.00211571  | 0.006737957 | CRIP2      |
| ENSG00000269978 | 8.116577183 | 0           | 5.355523082  | 0.002116057 | 0.006738238 | AL359881.1 |



|                 |             |             |              |             |             |            |
|-----------------|-------------|-------------|--------------|-------------|-------------|------------|
| novel.820       | 0.616711807 | 28.74534124 | -5.553061849 | 0.002118925 | 0.006746544 | -          |
| ENSG00000180871 | 14.84628635 | 1.069617038 | 3.787679135  | 0.002121071 | 0.006752549 | CXCR2      |
| ENSG00000116984 | 2135.988738 | 1153.525862 | 0.888837729  | 0.002123158 | 0.006758363 | MTR        |
| ENSG00000111254 | 29.75554023 | 8.16257085  | 1.858413516  | 0.002124404 | 0.006761503 | AKAP3      |
| ENSG00000013583 | 385.5570715 | 939.4999337 | -1.28506518  | 0.002127217 | 0.006769625 | HEBP1      |
| ENSG00000280639 | 9.687333165 | 0.336469917 | 4.648062394  | 0.002128905 | 0.006774167 | LINC02204  |
| ENSG00000266338 | 330.5494718 | 846.9269853 | -1.357079244 | 0.002130536 | 0.006778527 | NBPF15     |
| ENSG00000171720 | 752.4142738 | 1370.892219 | -0.865281759 | 0.002131689 | 0.006780864 | HDAC3      |
| ENSG00000139531 | 528.8194574 | 294.3581443 | 0.844521718  | 0.002131792 | 0.006780864 | SUOX       |
| ENSG00000197756 | 10563.91974 | 16663.65975 | -0.657565943 | 0.002132309 | 0.006781676 | RPL37A     |
| ENSG00000127837 | 1544.441661 | 2302.414643 | -0.576058514 | 0.002133347 | 0.006784147 | AAMP       |
| ENSG00000277999 | 13.65946156 | 1.386017859 | 3.26666475   | 0.002137748 | 0.00679731  | AC009093.6 |
| ENSG00000185453 | 585.6410824 | 320.320101  | 0.87131469   | 0.002139614 | 0.006802412 | ZSWIM9     |
| ENSG00000154016 | 7.925380782 | 0           | 5.319314929  | 0.002140307 | 0.006803783 | GRAP       |
| ENSG00000237212 | 7.880035613 | 0           | 5.311800829  | 0.002141512 | 0.006806781 | AL449403.1 |
| ENSG00000140694 | 35.10346726 | 120.4199532 | -1.778702283 | 0.002144187 | 0.006814061 | PARN       |
| ENSG00000268442 | 15.94743541 | 1.783850939 | 3.156845128  | 0.002144327 | 0.006814061 | AC073534.1 |
| ENSG00000226581 | 8.382095215 | 0           | 5.40240565   | 0.002151711 | 0.006835191 | AC092634.3 |
| ENSG00000164674 | 57.35355805 | 209.0788753 | -1.864932479 | 0.002151774 | 0.006835191 | SYTL3      |
| ENSG00000166289 | 347.7237028 | 100.7773613 | 1.787469953  | 0.002151973 | 0.006835191 | PLEKHF1    |
| novel.612       | 9.70370187  | 0.387220594 | 4.65017614   | 0.002152029 | 0.006835191 | -          |
| ENSG00000279443 | 3.020591515 | 22.20097834 | -2.881148729 | 0.00215856  | 0.006854613 | AL513497.1 |
| ENSG00000260331 | 16.44071947 | 1.436768536 | 3.518487609  | 0.002158672 | 0.006854613 | AC079148.1 |
| ENSG00000286584 | 23.43343938 | 4.758889366 | 2.314215347  | 0.00216025  | 0.006858786 | AC023494.1 |
| ENSG00000167037 | 18.00667432 | 2.51699806  | 2.838715483  | 0.002160607 | 0.006859082 | SGSM1      |
| ENSG00000182240 | 1687.279376 | 765.6879488 | 1.139779278  | 0.002163476 | 0.006866652 | BACE2      |
| ENSG00000259781 | 655.0813213 | 1115.740364 | -0.768529106 | 0.00216352  | 0.006866652 | HMGB1P6    |
| ENSG00000020633 | 103.6298656 | 16.76054443 | 2.634195518  | 0.00216979  | 0.006885712 | RUNX3      |
| novel.922       | 52.63949447 | 6.33729745  | 3.065345526  | 0.002181137 | 0.006920875 | -          |
| ENSG00000109684 | 9.813268209 | 0           | 5.627329148  | 0.002181476 | 0.006921106 | CLNK       |
| ENSG00000215067 | 118.5608313 | 45.22710136 | 1.387054808  | 0.002182483 | 0.006923454 | ALOX12-AS1 |
| ENSG00000087074 | 5027.107977 | 1927.255173 | 1.383270817  | 0.002187373 | 0.006938119 | PPP1R15A   |
| ENSG00000231507 | 9.252970946 | 0           | 5.545066832  | 0.002189505 | 0.006944034 | LINC01353  |
| ENSG00000271327 | 70.50920816 | 17.36407716 | 2.018673603  | 0.00219102  | 0.006947991 | AC010201.2 |
| ENSG00000270547 | 16.44594753 | 0.713078025 | 4.519697739  | 0.002192535 | 0.006951948 | LINC01235  |
| ENSG00000180626 | 211.5384366 | 99.25163017 | 1.09058684   | 0.002196945 | 0.006965081 | ZNF594     |
| ENSG00000250659 | 1.509042109 | 12.168244   | -3.009408748 | 0.002198391 | 0.006968814 | AP001363.1 |
| ENSG00000103227 | 544.9536166 | 260.0286281 | 1.068497474  | 0.002199103 | 0.006970221 | LMF1       |
| ENSG00000198954 | 856.0362619 | 1305.12927  | -0.608682054 | 0.002199923 | 0.006971968 | KIF1BP     |
| ENSG00000013523 | 711.1631499 | 405.8046248 | 0.810023638  | 0.002204454 | 0.006985477 | ANGEL1     |
| ENSG00000257027 | 68.33763836 | 22.80895899 | 1.575224651  | 0.002218574 | 0.007029363 | AC010186.3 |
| ENSG00000171533 | 443.4712835 | 126.4615612 | 1.81149235   | 0.002219438 | 0.007031244 | MAP6       |
| ENSG00000176919 | 19.51070183 | 2.435565801 | 2.978103966  | 0.002223221 | 0.007042369 | C8G        |
| ENSG00000277053 | 546.9845914 | 306.2489229 | 0.837437492  | 0.002224902 | 0.007046835 | GTF2IP1    |
| ENSG00000251532 | 9.653270835 | 0           | 5.605080273  | 0.002227606 | 0.007054538 | AC091849.2 |
| ENSG00000232310 | 11.63797465 | 0.387220594 | 4.914503163  | 0.002239186 | 0.007090346 | AL078590.2 |
| ENSG00000131558 | 802.660345  | 1208.947745 | -0.590922776 | 0.002241112 | 0.00709558  | EXOC4      |
| ENSG00000169604 | 3393.71221  | 5803.118104 | -0.774006835 | 0.002249964 | 0.007122739 | ANTXR1     |
| ENSG00000116455 | 301.264706  | 629.6628325 | -1.063988253 | 0.002254653 | 0.007136713 | WDR77      |
| ENSG00000233718 | 7.284707106 | 0           | 5.198215878  | 0.002258798 | 0.007148962 | MYCNOS     |
| ENSG00000120798 | 701.673166  | 442.9760034 | 0.663774751  | 0.002260479 | 0.00715341  | NR2C1      |

|                 |             |             |              |             |             |            |
|-----------------|-------------|-------------|--------------|-------------|-------------|------------|
| ENSG00000280159 | 9.71505598  | 0.387220594 | 4.651657318  | 0.002261205 | 0.007154146 | AC016583.1 |
| ENSG00000168778 | 129.2058984 | 234.8223618 | -0.861908183 | 0.002261262 | 0.007154146 | TCTN2      |
| ENSG00000071794 | 638.3881612 | 1156.614368 | -0.857236906 | 0.002271904 | 0.00718694  | HLTF       |
| ENSG00000257851 | 6.665488001 | 26.39313394 | -1.987345866 | 0.00227828  | 0.007206231 | HNRNPA3P10 |
| ENSG00000175155 | 682.5317632 | 334.7059292 | 1.028757502  | 0.002278673 | 0.007206597 | YPEL2      |
| novel.356       | 15.699611   | 0.774441189 | 4.414102607  | 0.002279451 | 0.007208181 | -          |
| ENSG00000219545 | 225.4348667 | 128.8498096 | 0.805992615  | 0.002279916 | 0.007208775 | UMAD1      |
| ENSG00000067167 | 2948.597476 | 7083.28976  | -1.264442786 | 0.002284309 | 0.007221786 | TRAM1      |
| ENSG00000138375 | 426.717352  | 663.0542948 | -0.63572182  | 0.002284659 | 0.007222013 | SMARCAL1   |
| ENSG00000258056 | 184.6668669 | 87.13747608 | 1.082267472  | 0.002289393 | 0.007236097 | AC009779.2 |
| ENSG00000261786 | 879.2857041 | 300.9721583 | 1.547243707  | 0.002291627 | 0.007242276 | AC006058.1 |
| ENSG00000260668 | 3.914175465 | 21.20778487 | -2.430643417 | 0.002294885 | 0.007251693 | AC093536.1 |
| ENSG00000151006 | 28.62262268 | 89.25988593 | -1.638580653 | 0.002295737 | 0.007253502 | PRSS53     |
| ENSG00000171827 | 171.6888087 | 87.98384574 | 0.965332477  | 0.002298733 | 0.007262084 | ZNF570     |
| ENSG00000253846 | 64.05353531 | 201.7292612 | -1.654963215 | 0.00230329  | 0.007275597 | PCDHGA10   |
| novel.204       | 0           | 8.633663848 | -5.695590716 | 0.002304015 | 0.007277    | -          |
| ENSG00000162777 | 127.6075892 | 34.4363177  | 1.889253524  | 0.002306201 | 0.007283022 | DENND2D    |
| ENSG00000171658 | 11.57898154 | 62.03343497 | -2.422727082 | 0.002307719 | 0.007286927 | NMRAL2P    |
| ENSG00000117543 | 294.5592712 | 567.7953788 | -0.94744252  | 0.002314555 | 0.007307627 | DPH5       |
| ENSG00000183718 | 329.224204  | 162.4241705 | 1.019930247  | 0.002316599 | 0.007313191 | TRIM52     |
| ENSG00000111674 | 1079.207276 | 4369.815189 | -2.017545829 | 0.002318145 | 0.007317181 | ENO2       |
| ENSG00000088899 | 521.390395  | 232.2933729 | 1.167532228  | 0.002322576 | 0.007329955 | LZTS3      |
| ENSG00000204209 | 35.10554728 | 3.047014077 | 3.553319539  | 0.002322756 | 0.007329955 | DAXX       |
| ENSG00000169314 | 0.925067711 | 16.51282721 | -4.174413625 | 0.002324938 | 0.007335949 | C22orf15   |
| ENSG00000163482 | 395.3670665 | 721.0988205 | -0.866673343 | 0.002325937 | 0.007338211 | STK36      |
| ENSG00000075568 | 779.9205054 | 1351.435454 | -0.792818348 | 0.002329413 | 0.007348284 | TMEM131    |
| ENSG00000047410 | 1810.776034 | 2804.335301 | -0.63096089  | 0.002335117 | 0.007365386 | TPR        |
| ENSG00000261051 | 7.66863829  | 43.0932143  | -2.492451137 | 0.002337115 | 0.007370791 | AC107021.2 |
| ENSG00000105696 | 1094.870469 | 259.521275  | 2.076088859  | 0.002343693 | 0.007390639 | AC003112.1 |
| ENSG00000165899 | 59.05978007 | 8.212037258 | 2.857348056  | 0.002345287 | 0.007394768 | OTOGL      |
| ENSG00000204860 | 13.64907636 | 0.387220594 | 5.144432782  | 0.00234651  | 0.007397728 | FAM201A    |
| ENSG00000162745 | 1095.100538 | 350.4564216 | 1.643943354  | 0.002350614 | 0.007409769 | OLFML2B    |
| ENSG00000270959 | 76.05753405 | 34.6595179  | 1.131817825  | 0.002353118 | 0.007416761 | LPP-AS2    |
| ENSG00000234699 | 13.08558762 | 0.713078025 | 4.189216705  | 0.002353775 | 0.00741793  | AL139339.1 |
| ENSG00000237945 | 58.9618804  | 8.050328615 | 2.877500621  | 0.002361228 | 0.007440516 | LINC00649  |
| ENSG00000124818 | 9.845792156 | 0           | 5.634514958  | 0.0023625   | 0.007443623 | OPN5       |
| ENSG00000141527 | 45.1550014  | 10.87311501 | 2.05912811   | 0.002368279 | 0.007460926 | CARD14     |
| ENSG00000156011 | 404.5805166 | 1233.249378 | -1.607856987 | 0.002370335 | 0.007466498 | PSD3       |
| ENSG00000171311 | 378.6317374 | 616.6943807 | -0.704208334 | 0.002372299 | 0.007470951 | EXOSC1     |
| ENSG00000287467 | 16.26965272 | 1.702418679 | 3.213797146  | 0.002372324 | 0.007470951 | AC037459.4 |
| ENSG00000165138 | 369.9448338 | 558.4843616 | -0.59452092  | 0.002378114 | 0.007488278 | ANKS6      |
| ENSG00000137513 | 204.5894088 | 349.0655834 | -0.770940212 | 0.002379508 | 0.007491759 | NARS2      |
| ENSG00000183801 | 381.5703819 | 10.9275901  | 5.122395701  | 0.002386498 | 0.007512855 | OLFML1     |
| ENSG00000143418 | 1303.280971 | 1854.636083 | -0.508977495 | 0.002397903 | 0.007547846 | CERS2      |
| ENSG00000242880 | 8.371994754 | 0           | 5.400757771  | 0.002398197 | 0.007547856 | AC026341.1 |
| ENSG00000203808 | 57.84078733 | 20.16769354 | 1.528423848  | 0.002411196 | 0.007587849 | BVES-AS1   |
| ENSG00000175946 | 0           | 7.795290958 | -5.53917832  | 0.00242103  | 0.007617874 | KLHL38     |
| ENSG00000229700 | 7.823336335 | 0           | 5.302332975  | 0.002425053 | 0.007628683 | AL008627.1 |
| ENSG00000254607 | 7.823336335 | 0           | 5.302332975  | 0.002425053 | 0.007628683 | AP001783.1 |
| ENSG00000125967 | 324.8653799 | 543.0702451 | -0.740665763 | 0.002425409 | 0.00762888  | NECAB3     |
| ENSG00000104679 | 800.8998601 | 485.2338588 | 0.722604961  | 0.002426562 | 0.007631582 | R3HCC1     |

|                 |             |             |              |             |             |             |
|-----------------|-------------|-------------|--------------|-------------|-------------|-------------|
| ENSG00000148362 | 1040.811414 | 499.6234239 | 1.058194809  | 0.002428312 | 0.007636162 | PAXX        |
| ENSG00000258667 | 8.26744301  | 62.44324602 | -2.911280069 | 0.002429656 | 0.007639465 | HIF1A-AS2   |
| ENSG00000136891 | 472.0493759 | 820.5433204 | -0.797448692 | 0.002430988 | 0.007642726 | TEX10       |
| ENSG00000168175 | 1203.779256 | 1892.73487  | -0.653052932 | 0.002431333 | 0.007642888 | MAPK1IP1L   |
| ENSG00000171084 | 18.7163703  | 47.24797582 | -1.335269953 | 0.002433221 | 0.007647324 | FAM86JP     |
| ENSG00000101457 | 441.2903843 | 722.8003876 | -0.711643388 | 0.002433333 | 0.007647324 | DNTTIP1     |
| ENSG00000157869 | 468.6845274 | 302.6050543 | 0.631088218  | 0.002434096 | 0.007648255 | RAB28       |
| ENSG00000186952 | 29.80310796 | 8.591085512 | 1.794185949  | 0.002434218 | 0.007648255 | TMEM232     |
| ENSG00000135362 | 148.4019323 | 439.3253066 | -1.566483282 | 0.002435078 | 0.007650033 | PRR5L       |
| novel.873       | 85.05136992 | 321.0261969 | -1.915176756 | 0.002436334 | 0.007653052 | -           |
| ENSG00000143184 | 19.07168103 | 0           | 6.586644123  | 0.00243821  | 0.007658019 | XCL1        |
| ENSG00000213542 | 10.49273408 | 0.336469917 | 4.764740483  | 0.002439309 | 0.007660546 | AC007000.1  |
| ENSG00000279026 | 19.6692321  | 2.822786395 | 2.788481855  | 0.002442332 | 0.007669111 | AC005225.4  |
| ENSG00000157680 | 50.08048979 | 21.14655011 | 1.242516443  | 0.002444209 | 0.007674079 | DGKI        |
| ENSG00000180638 | 16.41704234 | 2.904218654 | 2.507415856  | 0.002446248 | 0.00767955  | SLC47A2     |
| ENSG00000218891 | 346.5303848 | 582.0348156 | -0.748259458 | 0.002446621 | 0.007679794 | ZNF579      |
| ENSG00000167220 | 59.76030106 | 26.66926817 | 1.165615784  | 0.002447276 | 0.007680922 | HDHD2       |
| ENSG00000185324 | 924.5480869 | 1445.545846 | -0.644700515 | 0.002449034 | 0.007685511 | CDK10       |
| ENSG00000286532 | 75.79062018 | 27.27498425 | 1.470783035  | 0.002452671 | 0.007694821 | PARTICL     |
| ENSG00000143869 | 46.07429872 | 2.894762044 | 3.995783797  | 0.002452763 | 0.007694821 | GDF7        |
| ENSG00000100865 | 429.0452288 | 732.9431121 | -0.772950675 | 0.002452889 | 0.007694821 | CINP        |
| ENSG00000106123 | 57.77677962 | 8.195692577 | 2.803212557  | 0.00245582  | 0.007703084 | EPHB6       |
| ENSG00000259433 | 7.517487729 | 0           | 5.244951176  | 0.002460359 | 0.00771639  | AC051619.3  |
| ENSG00000279633 | 12.51672828 | 0.723690511 | 4.120094024  | 0.00246221  | 0.007721264 | AL137918.1  |
| ENSG00000091536 | 44.17728009 | 11.56740821 | 1.924220669  | 0.002464244 | 0.007726709 | MYO15A      |
| ENSG00000158428 | 7.241869235 | 0           | 5.190605702  | 0.002465159 | 0.007728647 | CATIP       |
| ENSG00000267361 | 7.272099347 | 0           | 5.195985368  | 0.002466398 | 0.007731597 | SEC24AP1    |
| ENSG00000163528 | 205.9615886 | 342.0385691 | -0.732040211 | 0.002468278 | 0.007736559 | CHCHD4      |
| ENSG00000167555 | 327.3385663 | 187.1551995 | 0.806119741  | 0.002471905 | 0.007746835 | ZNF528      |
| ENSG00000172932 | 1399.314214 | 935.6019734 | 0.580858971  | 0.002472153 | 0.007746835 | ANKRD13D    |
| ENSG00000165171 | 28.42300674 | 102.655954  | -1.85397619  | 0.002486846 | 0.007791937 | METTL27     |
| ENSG00000235831 | 23.55937442 | 5.63611618  | 2.051402609  | 0.002492794 | 0.007809631 | BHLHE40-AS1 |
| novel.604       | 0.61420451  | 12.02544858 | -4.30789036  | 0.002495406 | 0.007816372 | -           |
| ENSG00000153201 | 1611.220467 | 2388.547596 | -0.568022868 | 0.002495547 | 0.007816372 | RANBP2      |
| ENSG00000175193 | 242.0431767 | 145.1121755 | 0.737968448  | 0.002496017 | 0.007816902 | PARL        |
| ENSG00000198003 | 31.31368845 | 8.732725059 | 1.849178575  | 0.002498017 | 0.007822221 | CCDC151     |
| ENSG00000180190 | 281.4985869 | 141.5793463 | 0.993262315  | 0.002502859 | 0.00783644  | TDRP        |
| ENSG00000261156 | 0           | 6.908735928 | -5.367453323 | 0.002503257 | 0.007836742 | LINC01989   |
| ENSG00000130764 | 845.9504234 | 1374.746111 | -0.700674883 | 0.00250373  | 0.007837277 | LRRC47      |
| ENSG00000092094 | 810.555812  | 432.8521834 | 0.904694855  | 0.002504422 | 0.007838501 | OSGEP       |
| ENSG00000113460 | 385.3382402 | 821.2269452 | -1.091992908 | 0.002510359 | 0.007856137 | BRIX1       |
| ENSG00000274825 | 0           | 7.430579604 | -5.476613642 | 0.002511441 | 0.007858574 | AL023803.2  |
| ENSG00000112706 | 22.03528853 | 4.73882027  | 2.228607219  | 0.002514055 | 0.007865807 | IMP1        |
| ENSG00000107485 | 17.16094284 | 1.41669944  | 3.586673802  | 0.0025149   | 0.007867504 | GATA3       |
| ENSG00000261490 | 167.619979  | 50.86210884 | 1.716924826  | 0.00251666  | 0.007872063 | AC005674.2  |
| ENSG00000250486 | 50.83309491 | 16.2554778  | 1.638578562  | 0.00251861  | 0.007877213 | FAM218A     |
| ENSG00000218350 | 0.308355904 | 8.723268448 | -4.741492184 | 0.002521958 | 0.007886733 | LYPLA1P3    |
| ENSG00000132821 | 19.41137815 | 185.5542354 | -3.258020501 | 0.002525982 | 0.007897909 | VSTM2L      |
| ENSG00000104237 | 4.513264919 | 25.85096438 | -2.51081327  | 0.002526139 | 0.007897909 | RP1         |
| ENSG00000122873 | 218.501879  | 529.2720844 | -1.276836342 | 0.002530254 | 0.007909823 | CISD1       |
| ENSG00000172250 | 50.94169233 | 12.51288626 | 2.03342122   | 0.002533153 | 0.00791793  | SERHL       |

|                 |             |             |              |             |             |             |
|-----------------|-------------|-------------|--------------|-------------|-------------|-------------|
| ENSG00000235385 | 0           | 10.15875272 | -5.921871861 | 0.002534447 | 0.007921022 | LINC02154   |
| ENSG00000145088 | 59.23295467 | 18.19402092 | 1.693871715  | 0.002535998 | 0.007924918 | EAF2        |
| ENSG00000175806 | 67.52625429 | 15.06172177 | 2.170417298  | 0.002536594 | 0.007925827 | MSRA        |
| ENSG00000225178 | 632.6982022 | 1509.810633 | -1.254765174 | 0.002537626 | 0.007928098 | RPSAP58     |
| ENSG00000136098 | 445.4629995 | 200.6403582 | 1.149790936  | 0.002539769 | 0.007933384 | NEK3        |
| ENSG00000188690 | 705.7113661 | 1180.799109 | -0.742829302 | 0.002545022 | 0.007949294 | UROS        |
| ENSG00000061938 | 2059.517283 | 834.5969733 | 1.303496878  | 0.00255164  | 0.007969006 | TNK2        |
| ENSG00000066136 | 808.267494  | 477.587913  | 0.758466103  | 0.002555587 | 0.007980374 | NFYC        |
| ENSG00000058091 | 396.0994815 | 964.4112453 | -1.284087068 | 0.002556457 | 0.00798213  | CDK14       |
| ENSG00000272275 | 12.93945165 | 0.672939833 | 4.19882816   | 0.002559177 | 0.007989664 | AC092687.3  |
| ENSG00000068615 | 16.47374161 | 2.496928964 | 2.715583477  | 0.00256172  | 0.007996641 | REEP1       |
| novel.598       | 14.7199953  | 0           | 6.214622339  | 0.002566208 | 0.008009687 | -           |
| ENSG00000187824 | 192.5728457 | 65.00556653 | 1.56369539   | 0.002567234 | 0.008011928 | TMEM220     |
| novel.851       | 8.535824346 | 0           | 5.426522729  | 0.002568445 | 0.008014744 | -           |
| ENSG00000286086 | 9.392838668 | 0.336469917 | 4.603359224  | 0.002571148 | 0.008022216 | AC099661.1  |
| ENSG00000109466 | 510.4338794 | 289.1866526 | 0.819547297  | 0.002574398 | 0.008030654 | KLHL2       |
| ENSG00000243566 | 11.09049861 | 0           | 5.805666111  | 0.00257447  | 0.008030654 | UPK3B       |
| ENSG00000232022 | 9.96169801  | 0.336469917 | 4.688823245  | 0.002575388 | 0.008031628 | FAAHP1      |
| ENSG00000145198 | 33.7367289  | 4.148596966 | 3.005922219  | 0.002575401 | 0.008031628 | VWA5B2      |
| ENSG00000241158 | 22.83907979 | 1.069617038 | 4.411563435  | 0.002586738 | 0.008066014 | ADAMTS9-AS1 |
| ENSG00000253187 | 0           | 9.632461113 | -5.853004595 | 0.002588495 | 0.008070526 | HOXA10-AS   |
| ENSG00000137177 | 1244.075142 | 832.9059965 | 0.579020125  | 0.00259008  | 0.008074497 | KIF13A      |
| ENSG00000103544 | 834.7143305 | 1272.555316 | -0.608250109 | 0.00259274  | 0.008081822 | VPS35L      |
| ENSG00000151914 | 7839.719627 | 4009.323386 | 0.967466275  | 0.002599384 | 0.008101559 | DST         |
| ENSG00000158815 | 19.2690744  | 1.844058227 | 3.403342451  | 0.002601094 | 0.008105917 | FGF17       |
| ENSG00000172425 | 14.36059546 | 1.110911105 | 3.720096939  | 0.002602665 | 0.008109839 | TTC36       |
| ENSG00000231204 | 11.9287082  | 0.387220594 | 4.949981691  | 0.002603859 | 0.008112587 | AC011752.1  |
| ENSG00000226051 | 8.355626049 | 0           | 5.39812295   | 0.002605031 | 0.008115265 | ZNF503-AS1  |
| ENSG00000144283 | 1789.818795 | 793.1469535 | 1.173818283  | 0.002608969 | 0.008126559 | PKP4        |
| ENSG00000286695 | 1.54052587  | 22.41660131 | -3.870191524 | 0.002612767 | 0.008137412 | AC026316.5  |
| ENSG00000197102 | 6986.248384 | 11300.44761 | -0.693772694 | 0.002613401 | 0.008138413 | DYNC1H1     |
| ENSG00000136872 | 10.03351234 | 0.356539013 | 4.698022159  | 0.002617015 | 0.008148691 | ALDOB       |
| ENSG00000198793 | 984.9401164 | 1569.794583 | -0.672298831 | 0.00262168  | 0.008162236 | MTOR        |
| ENSG00000111911 | 688.4254426 | 379.6269039 | 0.858839015  | 0.002623213 | 0.008166603 | HINT3       |
| ENSG00000116962 | 2522.673603 | 8318.9693   | -1.721489838 | 0.002624988 | 0.008170577 | NID1        |
| ENSG00000102010 | 9.721324223 | 0.336469917 | 4.652506381  | 0.002625478 | 0.008171124 | BMX         |
| ENSG00000092931 | 451.0279354 | 275.1983194 | 0.711834994  | 0.002626373 | 0.008172931 | MFSD11      |
| ENSG00000167676 | 10.30780592 | 35.63953033 | -1.793691491 | 0.00262954  | 0.008181805 | PLIN4       |
| ENSG00000160124 | 153.4977482 | 284.6570468 | -0.891024324 | 0.002633417 | 0.008192888 | CCDC58      |
| ENSG00000157985 | 1464.618494 | 758.1255933 | 0.950386771  | 0.002634687 | 0.008195857 | AGAP1       |
| ENSG00000197565 | 19.61016771 | 82.38354822 | -2.07360286  | 0.002640098 | 0.008211706 | COL4A6      |
| ENSG00000256050 | 34.50882293 | 7.733927794 | 2.170761888  | 0.002647463 | 0.008232794 | AL583722.1  |
| novel.34        | 11.86978636 | 1.080229524 | 3.460103626  | 0.002647511 | 0.008232794 | -           |
| ENSG00000110025 | 39.74342267 | 9.020884443 | 2.125677122  | 0.002648688 | 0.008235467 | SNX15       |
| ENSG00000116539 | 1613.091646 | 955.1806544 | 0.756166889  | 0.002649484 | 0.008236957 | ASH1L       |
| ENSG00000146001 | 11.8357953  | 0.693008929 | 4.05543943   | 0.002650496 | 0.008239117 | PCDHB18P    |
| ENSG00000168237 | 78.24325    | 162.4869935 | -1.053759371 | 0.002656226 | 0.008254978 | GLYCTK      |
| ENSG00000130066 | 8089.746753 | 2674.964413 | 1.596662656  | 0.002656234 | 0.008254978 | SAT1        |
| ENSG00000267072 | 8.577337297 | 0           | 5.43301529   | 0.002657221 | 0.008257057 | NAGPA-AS1   |
| ENSG00000088882 | 2578.398444 | 353.7489265 | 2.865397172  | 0.002658134 | 0.008258906 | CPXM1       |
| ENSG00000273893 | 37.65291346 | 8.926271159 | 2.092974375  | 0.002659485 | 0.008262117 | AL133520.1  |

|                 |             |             |              |             |             |            |
|-----------------|-------------|-------------|--------------|-------------|-------------|------------|
| ENSG00000241456 | 8.944615042 | 0           | 5.496276181  | 0.002662143 | 0.008269385 | AC005996.1 |
| ENSG00000176915 | 1317.276274 | 2565.6154   | -0.961599196 | 0.00266359  | 0.008272891 | ANKLE2     |
| ENSG00000250651 | 8.078753907 | 0           | 5.349278777  | 0.002664077 | 0.008273414 | PABPC1P7   |
| ENSG00000141750 | 4.311968057 | 51.79256084 | -3.589476424 | 0.002665455 | 0.008276704 | STAC2      |
| ENSG00000233836 | 13.31077508 | 1.803920035 | 2.888693195  | 0.002668857 | 0.008286278 | AC139769.1 |
| ENSG00000100578 | 261.7450749 | 500.2655406 | -0.935007919 | 0.002669191 | 0.008286325 | KIAA0586   |
| ENSG00000140350 | 1603.676594 | 2681.272067 | -0.741572521 | 0.002672357 | 0.008295162 | ANP32A     |
| ENSG00000196526 | 1123.05776  | 2650.506075 | -1.238957861 | 0.00267523  | 0.008303087 | AFAP1      |
| novel.778       | 10.02599045 | 0           | 5.659132651  | 0.002675986 | 0.008304444 | -          |
| ENSG00000116514 | 462.4943295 | 259.8728269 | 0.83131237   | 0.002676309 | 0.008304454 | RNF19B     |
| ENSG00000148840 | 619.2916092 | 1136.064839 | -0.875366732 | 0.002677655 | 0.008307639 | PPRC1      |
| ENSG00000254681 | 39.24734658 | 174.1265526 | -2.149326899 | 0.002678639 | 0.008309166 | PKD1P5     |
| ENSG00000179912 | 721.5882144 | 419.9135481 | 0.781771707  | 0.002678787 | 0.008309166 | R3HDM2     |
| ENSG00000146205 | 17.842916   | 57.05245409 | -1.674179343 | 0.002685801 | 0.008329925 | ANO7       |
| ENSG00000224795 | 7.922873484 | 0           | 5.318966736  | 0.002687051 | 0.008332808 | NTM-AS1    |
| ENSG00000261402 | 7.503626321 | 0           | 5.242515191  | 0.002687905 | 0.008334463 | AL591222.1 |
| ENSG00000287670 | 16.45074866 | 1.447381022 | 3.515348891  | 0.002688927 | 0.008336637 | AC108479.3 |
| ENSG00000258301 | 19.57087733 | 3.903015919 | 2.318630628  | 0.002697714 | 0.008362682 | VASH1-AS1  |
| ENSG00000272631 | 44.63588892 | 16.45963639 | 1.437314775  | 0.002698128 | 0.008362682 | AC067750.1 |
| ENSG00000232815 | 163.2036449 | 45.90769996 | 1.833100486  | 0.002698549 | 0.008362682 | DUX4L50    |
| ENSG00000286177 | 28.25527366 | 74.19145166 | -1.395331836 | 0.002698615 | 0.008362682 | AC011462.5 |
| ENSG00000100241 | 2058.219238 | 3506.082117 | -0.768361472 | 0.002701048 | 0.008369222 | SBF1       |
| ENSG00000196693 | 294.7241844 | 184.7216887 | 0.674396378  | 0.002703771 | 0.00837666  | ZNF33B     |
| ENSG00000259321 | 10.2398238  | 0.387220594 | 4.728861738  | 0.002708856 | 0.008391414 | AL136295.2 |
| ENSG00000133466 | 286.6148878 | 539.5336568 | -0.912334269 | 0.002712532 | 0.008401799 | C1QTNF6    |
| ENSG00000160746 | 554.8143649 | 1081.438842 | -0.962645279 | 0.002716309 | 0.008412494 | ANO10      |
| ENSG00000131080 | 422.6350433 | 138.6118036 | 1.606798691  | 0.002717479 | 0.008415116 | EDA2R      |
| ENSG00000249158 | 10.07126435 | 0.356539013 | 4.702866379  | 0.00272624  | 0.00843992  | PCDHA11    |
| ENSG00000230623 | 3.632288727 | 24.58882872 | -2.754232676 | 0.002726362 | 0.00843992  | AC104461.1 |
| ENSG00000164707 | 123.224847  | 34.07374252 | 1.857479412  | 0.002726463 | 0.00843992  | SLC13A4    |
| ENSG00000170275 | 4178.007641 | 6848.182304 | -0.712894063 | 0.002727698 | 0.008442737 | CRTAP      |
| ENSG00000142507 | 1458.492065 | 2206.900257 | -0.597489079 | 0.002728721 | 0.008444896 | PSMB6      |
| ENSG00000120729 | 17.01620306 | 1.069617038 | 3.984815145  | 0.002734744 | 0.008462527 | MYOT       |
| ENSG00000170509 | 14.78457248 | 2.140389951 | 2.783963431  | 0.002735646 | 0.00846431  | HSD17B13   |
| ENSG00000213923 | 1568.016329 | 3306.588233 | -1.076289141 | 0.002736667 | 0.008466461 | CSNK1E     |
| ENSG00000215440 | 613.9143493 | 315.6993495 | 0.959997893  | 0.002737183 | 0.00846705  | NPEPL1     |
| ENSG00000164924 | 9166.416577 | 12572.44956 | -0.455838523 | 0.0027376   | 0.008467332 | YWHAZ      |
| ENSG00000122548 | 9.825591233 | 0           | 5.631664586  | 0.002738995 | 0.008470639 | KIAA0087   |
| ENSG00000152578 | 45.00922144 | 8.4577467   | 2.405643348  | 0.00274074  | 0.008475027 | GRIA4      |
| ENSG00000131379 | 9.352508095 | 0.336469917 | 4.597948942  | 0.00274119  | 0.008475407 | C3orf20    |
| ENSG00000196233 | 814.9763778 | 451.3391368 | 0.852815886  | 0.002743342 | 0.008480974 | LCOR       |
| ENSG00000153982 | 80.6091208  | 22.26550516 | 1.863775316  | 0.002743643 | 0.008480974 | GDPD1      |
| ENSG00000117419 | 785.9232085 | 1275.916433 | -0.698948357 | 0.002744835 | 0.00848365  | ERI3       |
| ENSG00000131165 | 1343.654823 | 2148.979168 | -0.677447173 | 0.002747563 | 0.008491071 | CHMP1A     |
| ENSG00000235310 | 12.28025798 | 0           | 5.951230975  | 0.002750515 | 0.008499184 | GXYLT1P6   |
| ENSG00000141232 | 1375.504363 | 642.6135616 | 1.097551503  | 0.002755416 | 0.008513315 | TOB1       |
| ENSG00000204381 | 363.0644295 | 827.4828885 | -1.188288745 | 0.002758249 | 0.008521053 | LAYN       |
| ENSG00000054967 | 143.9191547 | 277.7117558 | -0.947625699 | 0.002760469 | 0.0085269   | RELT       |
| ENSG00000156103 | 111.1753334 | 235.5501619 | -1.083465327 | 0.002765457 | 0.008541291 | MMP16      |
| ENSG00000149679 | 110.0594966 | 198.9574479 | -0.854345075 | 0.002774509 | 0.008568231 | CABLES2    |
| ENSG00000214756 | 29.93921474 | 69.03922432 | -1.206691204 | 0.002776242 | 0.008572564 | CSKMT      |

|                 |             |             |              |             |             |              |
|-----------------|-------------|-------------|--------------|-------------|-------------|--------------|
| ENSG00000091732 | 230.2490369 | 385.4369766 | -0.743304391 | 0.002778053 | 0.008577135 | ZC3HC1       |
| ENSG00000166707 | 33.68490202 | 10.62997411 | 1.656245516  | 0.002780327 | 0.008583135 | ZCCHC18      |
| ENSG00000283051 | 6.976351202 | 0           | 5.135921797  | 0.002781172 | 0.008584726 | LINC01668    |
| ENSG00000166441 | 12442.57788 | 19526.18782 | -0.650120929 | 0.002782258 | 0.008587058 | RPL27A       |
| ENSG00000089351 | 1242.120213 | 2725.976209 | -1.133839626 | 0.002783091 | 0.008588272 | GRAMD1A      |
| ENSG00000061936 | 2289.066318 | 1024.42355  | 1.159977946  | 0.002783313 | 0.008588272 | SFSWAP       |
| ENSG00000273033 | 228.2101407 | 115.7377102 | 0.981395428  | 0.002783999 | 0.008589369 | LINC02035    |
| ENSG00000247828 | 504.0895281 | 266.4901926 | 0.919623531  | 0.002785701 | 0.0085936   | TMEM161B-AS1 |
| ENSG00000253669 | 8.976098803 | 40.42768862 | -2.166421735 | 0.002787713 | 0.008598785 | GASAL1       |
| ENSG00000261798 | 12.42861651 | 0.387220594 | 5.007420541  | 0.002789847 | 0.008604348 | AL033527.3   |
| ENSG00000189077 | 781.1972376 | 442.8383582 | 0.818660225  | 0.002797032 | 0.008625484 | TMEM120A     |
| ENSG00000196150 | 279.7883192 | 136.3682772 | 1.038628823  | 0.002797921 | 0.008627201 | ZNF250       |
| ENSG00000272690 | 65.23141454 | 13.73835135 | 2.250275157  | 0.00280049  | 0.008634097 | LINC02018    |
| ENSG00000173156 | 103.5638492 | 389.952224  | -1.913558137 | 0.002801419 | 0.008635937 | RHOD         |
| ENSG00000168710 | 1720.586636 | 2703.347921 | -0.651784958 | 0.002802321 | 0.00863769  | AHCYL1       |
| ENSG00000114988 | 437.3374883 | 665.5274771 | -0.606093282 | 0.002806723 | 0.008650235 | LMAN2L       |
| ENSG00000130045 | 4.180947147 | 26.91484922 | -2.680165798 | 0.002812654 | 0.008667483 | NXNL2        |
| ENSG00000120594 | 4313.371094 | 120.4690941 | 5.161770434  | 0.002812994 | 0.008667504 | PLXDC2       |
| ENSG00000073670 | 51.9029024  | 15.75614337 | 1.710086777  | 0.002814292 | 0.008670475 | ADAM11       |
| ENSG00000026025 | 58188.36705 | 34783.37762 | 0.742333334  | 0.002818885 | 0.008683596 | VIM          |
| ENSG00000135119 | 113.2414813 | 30.506473   | 1.886125733  | 0.00282774  | 0.008709843 | RNFT2        |
| ENSG00000254827 | 12.50913512 | 0.693008929 | 4.135747043  | 0.002828316 | 0.008710584 | SLC22A18AS   |
| ENSG00000279332 | 18.52363552 | 2.211209725 | 3.087177786  | 0.00283018  | 0.008714675 | AC090772.4   |
| ENSG00000162441 | 955.5898754 | 561.20762   | 0.767343461  | 0.002830315 | 0.008714675 | LZIC         |
| ENSG00000176142 | 688.0460427 | 1053.129686 | -0.61384604  | 0.002833092 | 0.008722189 | TMEM39A      |
| ENSG00000241839 | 1319.668522 | 811.7972391 | 0.701161069  | 0.002836162 | 0.008730606 | PLEKHO2      |
| ENSG00000188383 | 10.46626491 | 0.356539013 | 4.761366766  | 0.002841952 | 0.008747394 | GPAT2P2      |
| ENSG00000270562 | 22.2355452  | 4.555886656 | 2.270183969  | 0.002847035 | 0.008762002 | AC097634.1   |
| ENSG00000187398 | 32.67945755 | 0.356539013 | 6.401934086  | 0.002849118 | 0.008767372 | LUZP2        |
| novel.68        | 10.18563182 | 0.356539013 | 4.721991768  | 0.002850134 | 0.00876946  | -            |
| ENSG00000227115 | 7.273352996 | 0           | 5.196214655  | 0.002854209 | 0.008780959 | LINC01630    |
| ENSG00000287016 | 0           | 6.501446238 | -5.280818642 | 0.00285587  | 0.008784388 | AC010996.1   |
| novel.515       | 42.75788814 | 112.2701438 | -1.394552548 | 0.002856    | 0.008784388 | -            |
| ENSG00000287326 | 0           | 6.45069556  | -5.270926031 | 0.002864352 | 0.008809035 | AL589787.1   |
| ENSG00000087470 | 1383.96017  | 2026.241237 | -0.550046315 | 0.002865513 | 0.008811564 | DNM1L        |
| ENSG00000090554 | 24.71471546 | 4.921882279 | 2.3159157    | 0.002871732 | 0.008829641 | FLT3LG       |
| ENSG00000197506 | 0.293240848 | 8.76340664  | -4.747438464 | 0.002874047 | 0.008834474 | SLC28A3      |
| ENSG00000235865 | 190.7563179 | 52.53097343 | 1.861791846  | 0.002874316 | 0.008834474 | GSN-AS1      |
| novel.484       | 306.1939275 | 509.1789223 | -0.733287717 | 0.002874324 | 0.008834474 | -            |
| ENSG00000056277 | 77.09335083 | 144.2478257 | -0.902729507 | 0.00287598  | 0.008838519 | ZNF280C      |
| ENSG00000137478 | 807.3587353 | 402.1771949 | 1.004914727  | 0.002877526 | 0.008842223 | FCHSD2       |
| ENSG00000267707 | 14.27491972 | 1.518200796 | 3.281382851  | 0.002878785 | 0.008845047 | AC015961.2   |
| ENSG00000196730 | 405.6431846 | 58.12417295 | 2.80136155   | 0.002887895 | 0.008871989 | DAPK1        |
| ENSG00000179869 | 105.5987991 | 10.85189004 | 3.283496516  | 0.002891231 | 0.008881187 | ABCA13       |
| novel.757       | 7.522502324 | 0           | 5.245765388  | 0.002893779 | 0.008887964 | -            |
| ENSG00000173436 | 179.2631383 | 95.90332287 | 0.900691297  | 0.002895303 | 0.008891592 | MICOS10      |
| ENSG00000157191 | 1111.757931 | 1871.172015 | -0.751122981 | 0.002898987 | 0.008901855 | NECAP2       |
| ENSG00000136436 | 2255.208968 | 1384.795468 | 0.703637547  | 0.002901507 | 0.008908539 | CALCOCO2     |
| ENSG00000250305 | 10.43374096 | 0           | 5.715937401  | 0.002916379 | 0.008953112 | TRMT9B       |
| ENSG00000205542 | 51795.59397 | 27249.5313  | 0.926588427  | 0.002917039 | 0.008953112 | TMSB4X       |
| ENSG00000101049 | 23.58591486 | 3.300895859 | 2.849392436  | 0.002917058 | 0.008953112 | SGK2         |

|                 |             |             |              |             |             |            |
|-----------------|-------------|-------------|--------------|-------------|-------------|------------|
| ENSG00000286000 | 12.77060747 | 0.356539013 | 5.048466063  | 0.002917903 | 0.008954648 | AC234775.4 |
| ENSG00000008277 | 93.74729004 | 22.40984164 | 2.062521914  | 0.002920492 | 0.008961532 | ADAM22     |
| ENSG00000269929 | 254.2243682 | 111.7429535 | 1.185964118  | 0.002920973 | 0.008961951 | AL158152.1 |
| ENSG00000164597 | 60.94175526 | 151.3709    | -1.312353996 | 0.002925581 | 0.008975028 | COG5       |
| ENSG00000102910 | 1144.540033 | 1623.68511  | -0.504462038 | 0.002926372 | 0.00897551  | LONP2      |
| ENSG00000110881 | 64.49742852 | 198.2837721 | -1.619136193 | 0.002926429 | 0.00897551  | ASIC1      |
| ENSG00000086015 | 954.6409876 | 1450.148266 | -0.603080607 | 0.002928581 | 0.00898105  | MAST2      |
| ENSG00000105254 | 3303.297049 | 1947.60898  | 0.762191633  | 0.002932583 | 0.008992262 | TBCB       |
| ENSG00000083750 | 397.2698551 | 223.8895062 | 0.82830572   | 0.002933293 | 0.008993377 | RRAGB      |
| ENSG00000165916 | 2166.851418 | 3541.596866 | -0.708882418 | 0.002933859 | 0.008994053 | PSMC3      |
| novel.190       | 20.89004795 | 2.975038428 | 2.834602919  | 0.002935208 | 0.008997127 | -          |
| ENSG00000223561 | 9.073128655 | 0.336469917 | 4.553747552  | 0.002938106 | 0.00900478  | AC005165.1 |
| ENSG00000213433 | 28.73218902 | 8.937012039 | 1.682371071  | 0.002938773 | 0.00900478  | RPLP1P6    |
| ENSG00000131188 | 128.4736645 | 333.3543986 | -1.375668471 | 0.002939036 | 0.00900478  | PRR7       |
| ENSG00000119772 | 705.6793296 | 431.3605886 | 0.710098265  | 0.002939091 | 0.00900478  | DNMT3A     |
| ENSG00000197520 | 25.30649648 | 2.0188195   | 3.60995996   | 0.002943111 | 0.009016031 | FAM177B    |
| ENSG00000177535 | 7.30232946  | 0           | 5.20139941   | 0.002943611 | 0.0090165   | OR2B11     |
| ENSG00000132256 | 354.4360907 | 657.8220944 | -0.892715705 | 0.002945019 | 0.009019311 | TRIM5      |
| ENSG00000136942 | 9167.787973 | 14676.69613 | -0.67889894  | 0.002945223 | 0.009019311 | RPL35      |
| ENSG00000182890 | 69.36557689 | 22.80895899 | 1.597626074  | 0.002950413 | 0.00903414  | GLUD2      |
| ENSG00000270055 | 215.959615  | 83.35654419 | 1.371146253  | 0.002950904 | 0.009034578 | AC127502.2 |
| ENSG00000109193 | 0.293240848 | 180.138729  | -9.112336401 | 0.002952608 | 0.00903873  | SULT1E1    |
| ENSG00000240990 | 2.135854377 | 20.44536884 | -3.265367986 | 0.002953021 | 0.009038929 | HOXA11-AS  |
| ENSG00000123815 | 660.0406304 | 412.4728824 | 0.677538127  | 0.00295649  | 0.009048481 | COQ8B      |
| ENSG00000273183 | 21.36689204 | 3.486269618 | 2.597899365  | 0.002957949 | 0.009051882 | AC093726.2 |
| ENSG00000198336 | 6.963743444 | 0           | 5.133591817  | 0.002961655 | 0.009062155 | MYL4       |
| ENSG00000174915 | 145.4664477 | 284.408208  | -0.96696715  | 0.002965687 | 0.009073372 | PTDSS2     |
| ENSG00000166025 | 1086.123247 | 1835.647632 | -0.757248354 | 0.002966019 | 0.009073372 | AMOTL1     |
| ENSG00000254413 | 12.46887581 | 1.049547942 | 3.54410836   | 0.002968933 | 0.009081216 | CHKB-CPT1B |
| ENSG00000280231 | 2.140868972 | 13.96155155 | -2.713874443 | 0.002972594 | 0.009091343 | AL031719.2 |
| ENSG00000135049 | 366.7623071 | 237.4985    | 0.626708679  | 0.00297459  | 0.009096378 | AGTPBP1    |
| ENSG00000266208 | 44.53363066 | 146.4835181 | -1.718623852 | 0.002975325 | 0.009097154 | AC080112.1 |
| ENSG00000161021 | 79.57574075 | 12.01586357 | 2.730459555  | 0.002975544 | 0.009097154 | MAML1      |
| ENSG00000137496 | 179.5944593 | 87.42173548 | 1.040972557  | 0.002976886 | 0.009100185 | IL18BP     |
| ENSG00000140382 | 311.549262  | 491.0770273 | -0.656193893 | 0.002978001 | 0.009102523 | HMG20A     |
| ENSG00000130158 | 759.0488899 | 474.0301685 | 0.679091364  | 0.002982439 | 0.009115017 | DOCK6      |
| ENSG00000162231 | 2022.201901 | 1144.592216 | 0.820997186  | 0.002989415 | 0.009135262 | NXF1       |
| novel.176       | 8.170769163 | 0           | 5.364263887  | 0.002994232 | 0.009148366 | -          |
| ENSG00000172000 | 17.59000573 | 3.200550379 | 2.451342853  | 0.002994408 | 0.009148366 | ZNF556     |
| ENSG00000243795 | 15.32821631 | 1.069617038 | 3.835062916  | 0.002994808 | 0.009148515 | LINC02044  |
| ENSG00000066455 | 786.9533974 | 1245.489824 | -0.662199417 | 0.00299534  | 0.009149063 | GOLGA5     |
| ENSG00000133863 | 1.229662669 | 13.74793635 | -3.498208811 | 0.002995816 | 0.009149442 | TEX15      |
| ENSG00000233818 | 0.894837599 | 29.4668484  | -5.031212154 | 0.002997064 | 0.009152178 | AP000695.2 |
| ENSG00000139668 | 422.3773486 | 787.6115301 | -0.898511983 | 0.003000672 | 0.009162117 | WDFY2      |
| ENSG00000245958 | 243.0989527 | 110.6157789 | 1.135622624  | 0.003001569 | 0.009163182 | AC093752.1 |
| ENSG00000129911 | 471.6308251 | 758.8037302 | -0.68598088  | 0.003002056 | 0.009163182 | KLF16      |
| ENSG00000135763 | 144.2416571 | 327.3423759 | -1.183176671 | 0.003002079 | 0.009163182 | URB2       |
| ENSG00000140057 | 2.447971227 | 18.76875145 | -2.941510559 | 0.003005374 | 0.009172161 | AK7        |
| ENSG00000272416 | 10.89435888 | 0.336469917 | 4.817516182  | 0.00301382  | 0.009196858 | AC025175.1 |
| ENSG00000244128 | 0           | 6.726958189 | -5.333292471 | 0.003018186 | 0.0092091   | LINC01322  |
| ENSG00000215399 | 12.38918358 | 0           | 5.966144217  | 0.003022692 | 0.009221765 | HMGB3P7    |

|                 |             |             |              |             |             |            |
|-----------------|-------------|-------------|--------------|-------------|-------------|------------|
| ENSG00000227740 | 9.932721546 | 0.387220594 | 4.685040074  | 0.003024263 | 0.009225476 | AL513329.1 |
| ENSG00000272142 | 30.55850512 | 78.93857267 | -1.370301215 | 0.003025911 | 0.009228592 | AL359643.3 |
| ENSG00000028839 | 216.2499053 | 439.8142729 | -1.024590167 | 0.003025995 | 0.009228592 | TBPL1      |
| novel.479       | 757.5885958 | 1836.594293 | -1.277610304 | 0.003037063 | 0.009261259 | -          |
| ENSG00000133895 | 536.5833581 | 866.1611919 | -0.690628134 | 0.003042563 | 0.009276942 | MEN1       |
| ENSG00000278771 | 81.17279517 | 255.7975579 | -1.655026238 | 0.003048589 | 0.009294226 | RN7SL3     |
| ENSG00000132849 | 257.3299075 | 139.6532607 | 0.880691908  | 0.00305168  | 0.009302557 | PATJ       |
| ENSG00000099284 | 209.531293  | 673.5444615 | -1.684863271 | 0.003054353 | 0.009309612 | H2AFY2     |
| ENSG00000173653 | 295.8228975 | 494.4841892 | -0.741520306 | 0.003059581 | 0.009324455 | RCE1       |
| novel.163       | 0.307102255 | 8.265228081 | -4.666075981 | 0.00306231  | 0.009331676 | -          |
| ENSG00000198816 | 902.9805543 | 465.9195049 | 0.955250995  | 0.003062696 | 0.009331759 | ZNF358     |
| ENSG00000275764 | 187.3511381 | 95.96006253 | 0.964166926  | 0.003064528 | 0.009336246 | AC092747.4 |
| ENSG00000241859 | 35.39445771 | 0.672939833 | 5.674394506  | 0.003065792 | 0.009339003 | ANOS2P     |
| ENSG00000108848 | 4998.573573 | 3115.283257 | 0.682231414  | 0.003066773 | 0.009340894 | LUC7L3     |
| ENSG00000173258 | 23.02081646 | 4.872287477 | 2.220529819  | 0.003070558 | 0.009351327 | ZNF483     |
| ENSG00000166033 | 4733.42261  | 8261.825664 | -0.803533378 | 0.003071347 | 0.009352633 | HTRA1      |
| ENSG00000163870 | 807.7181667 | 1456.35539  | -0.850179959 | 0.003072972 | 0.009356484 | TPRA1      |
| ENSG00000092871 | 285.2424507 | 170.2289652 | 0.74515038   | 0.003082861 | 0.009385494 | RFFL       |
| ENSG00000078142 | 775.0454325 | 1267.550948 | -0.70945132  | 0.003084717 | 0.009390044 | PIK3C3     |
| ENSG00000224321 | 0           | 15.20104957 | -6.505972334 | 0.003086106 | 0.009393173 | RPL12P14   |
| ENSG00000153936 | 478.2483463 | 929.8363927 | -0.959129669 | 0.003086881 | 0.009394432 | HS2ST1     |
| ENSG00000178385 | 301.6149743 | 166.4744769 | 0.858607661  | 0.003095861 | 0.009420656 | PLEKHM3    |
| ENSG00000003402 | 2645.154242 | 1599.255956 | 0.726144063  | 0.0030988   | 0.009428496 | CFLAR      |
| ENSG00000177599 | 94.14623788 | 33.58861659 | 1.489235416  | 0.003105368 | 0.009447373 | ZNF491     |
| ENSG00000136527 | 1978.172847 | 3075.716595 | -0.636854701 | 0.003106737 | 0.009450432 | TRA2B      |
| ENSG00000176834 | 330.1013761 | 168.8399121 | 0.966237715  | 0.003108803 | 0.009455608 | VSIG10     |
| ENSG00000267169 | 90.31461795 | 44.87017716 | 1.01280773   | 0.003111036 | 0.009461292 | AC022098.1 |
| ENSG00000102287 | 1433.942784 | 557.2202053 | 1.363799084  | 0.003115836 | 0.009474783 | GABRE      |
| ENSG00000174720 | 1023.992462 | 713.3740581 | 0.521278382  | 0.003120926 | 0.009489149 | LARP7      |
| ENSG00000103021 | 76.71024602 | 172.8904754 | -1.172329786 | 0.003125303 | 0.009501346 | CCDC113    |
| ENSG00000076242 | 548.5165389 | 992.5481523 | -0.855983418 | 0.003130185 | 0.009514848 | MLH1       |
| ENSG00000235453 | 118.0379579 | 55.09774187 | 1.096415337  | 0.003130477 | 0.009514848 | SMIM27     |
| ENSG00000111859 | 322.2810015 | 1190.266362 | -1.885109669 | 0.003132655 | 0.009520353 | NEDD9      |
| ENSG00000226091 | 18.9659469  | 0.672939833 | 4.760983476  | 0.003135534 | 0.009527989 | LINC00937  |
| ENSG00000175634 | 545.033451  | 914.7357958 | -0.746756458 | 0.003136948 | 0.009531011 | RPS6KB2    |
| ENSG00000213862 | 66.34254935 | 139.410505  | -1.073201403 | 0.003137262 | 0.009531011 | AC044787.1 |
| ENSG00000102854 | 14.69792782 | 0.672939833 | 4.386053474  | 0.003139735 | 0.009537409 | MSLN       |
| ENSG00000179840 | 8.566054458 | 0           | 5.431320065  | 0.003140392 | 0.00953829  | PIK3CD-AS1 |
| ENSG00000153012 | 38.31310388 | 3.741307276 | 3.334340352  | 0.003142669 | 0.009543078 | LGI2       |
| ENSG00000122779 | 488.4461742 | 285.8117733 | 0.772622271  | 0.003142703 | 0.009543078 | TRIM24     |
| ENSG00000276842 | 10.57339522 | 0.336469917 | 4.774604785  | 0.003143764 | 0.009545183 | AC023510.2 |
| ENSG00000101911 | 412.2047359 | 749.6671955 | -0.8633414   | 0.0031474   | 0.009555106 | PRPS2      |
| ENSG00000267102 | 82.62083542 | 37.45033844 | 1.143319762  | 0.003154221 | 0.009574696 | AC060766.1 |
| ENSG00000070081 | 761.998506  | 1509.612832 | -0.986271106 | 0.00315721  | 0.009582647 | NUCB2      |
| ENSG00000119537 | 2180.970192 | 1292.06221  | 0.755430284  | 0.003160593 | 0.009591796 | KDSR       |
| ENSG00000100201 | 14593.50024 | 7398.391215 | 0.980069826  | 0.003162812 | 0.00959741  | DDX17      |
| ENSG00000146757 | 244.1822069 | 111.826008  | 1.12537922   | 0.003164893 | 0.009601724 | ZNF92      |
| ENSG00000115738 | 1778.290666 | 387.9487814 | 2.196124126  | 0.003165111 | 0.009601724 | ID2        |
| novel.173       | 22.33132141 | 74.91218845 | -1.747221593 | 0.003165343 | 0.009601724 | -          |
| ENSG00000255224 | 41.46944617 | 12.87186541 | 1.685118769  | 0.003170347 | 0.009615782 | AC109322.1 |
| ENSG00000028528 | 2893.601275 | 1933.687425 | 0.58144775   | 0.00317191  | 0.009619398 | SNX1       |



|                 |             |             |              |             |             |             |
|-----------------|-------------|-------------|--------------|-------------|-------------|-------------|
| ENSG00000133317 | 7.822082686 | 0           | 5.302048548  | 0.003174133 | 0.009625016 | LGALS12     |
| ENSG00000177464 | 73.57417558 | 334.6790408 | -2.185054692 | 0.003174983 | 0.009626473 | GPR4        |
| ENSG00000137185 | 315.3565644 | 183.6933657 | 0.7802397    | 0.003176628 | 0.009629617 | ZSCAN9      |
| ENSG00000133703 | 1308.822133 | 836.0694908 | 0.646519244  | 0.003176762 | 0.009629617 | KRAS        |
| ENSG00000274461 | 11.72239674 | 0.743759607 | 4.01662653   | 0.003184521 | 0.00965201  | AC023282.1  |
| ENSG00000170323 | 108.1197375 | 6.15680398  | 4.125837237  | 0.003188279 | 0.009662273 | FABP4       |
| ENSG00000168275 | 283.3548046 | 503.1000145 | -0.828788521 | 0.003190755 | 0.00966865  | COA6        |
| ENSG00000145354 | 422.5052771 | 652.6699014 | -0.627708163 | 0.00319619  | 0.009683988 | CISD2       |
| ENSG00000286615 | 14.19809079 | 1.4981317   | 3.2821537    | 0.003199752 | 0.009693652 | AC011416.4  |
| ENSG00000255980 | 8.184630571 | 0           | 5.366522948  | 0.003203512 | 0.00970391  | AP000439.3  |
| ENSG00000114547 | 13.15231609 | 1.080229524 | 3.607374355  | 0.00321188  | 0.009728126 | ROPN1B      |
| ENSG00000129159 | 15.47560592 | 1.762625967 | 3.118471474  | 0.003214652 | 0.009735387 | KCNC1       |
| ENSG00000179094 | 600.5960402 | 1551.76168  | -1.369332462 | 0.003217518 | 0.009742929 | AC129492.1  |
| novel.1043      | 63.61850487 | 0           | 8.325169918  | 0.003221969 | 0.009755271 | -           |
| ENSG00000180785 | 7.862341989 | 0           | 5.308831448  | 0.003230636 | 0.009779488 | OR51E1      |
| ENSG00000221340 | 25.92263882 | 3.964379082 | 2.713041919  | 0.00323072  | 0.009779488 | RNU6ATAC18P |
| ENSG00000272791 | 19.90702731 | 3.139187216 | 2.645987276  | 0.003232817 | 0.009784695 | AC073389.3  |
| ENSG00000162676 | 34.54463711 | 7.796575227 | 2.140651143  | 0.003233771 | 0.009786442 | GF11        |
| ENSG00000233264 | 9.231587646 | 0           | 5.541769197  | 0.003235114 | 0.009789366 | AC006042.3  |
| ENSG00000285410 | 531.8747096 | 302.342615  | 0.815110962  | 0.003236617 | 0.009792773 | GABPB1-IT1  |
| ENSG00000046651 | 686.357345  | 415.6396219 | 0.723733734  | 0.003241473 | 0.009806325 | OFD1        |
| ENSG00000271392 | 7.81699682  | 0           | 5.301176459  | 0.00324273  | 0.009808983 | AC006237.1  |
| ENSG00000180957 | 799.3528963 | 1400.441868 | -0.809164599 | 0.003246985 | 0.009820713 | PITPNB      |
| ENSG00000132554 | 39.67747714 | 3.515795324 | 3.4876071    | 0.003248117 | 0.009822992 | RGS22       |
| ENSG00000169905 | 1027.887504 | 1506.350673 | -0.551356262 | 0.003252042 | 0.009833719 | TOR1AIP2    |
| ENSG00000215251 | 217.7433776 | 375.0483453 | -0.784637378 | 0.003256603 | 0.009845354 | FASTKD5     |
| ENSG00000272864 | 14.18290446 | 1.467450118 | 3.292433281  | 0.003256648 | 0.009845354 | AC135803.1  |
| ENSG00000197362 | 184.3451204 | 107.1280966 | 0.783575181  | 0.003271391 | 0.009888773 | ZNF786      |
| ENSG00000156256 | 1286.849471 | 866.5720297 | 0.570428666  | 0.003273465 | 0.009893893 | USP16       |
| ENSG00000151247 | 700.2806555 | 1154.444991 | -0.721405146 | 0.003279577 | 0.009911212 | EIF4E       |
| ENSG00000105700 | 1054.137304 | 1547.935927 | -0.554193172 | 0.003282959 | 0.009919415 | KXD1        |
| ENSG00000283294 | 8.952208206 | 0           | 5.497318557  | 0.003283055 | 0.009919415 | AP005212.4  |
| ENSG00000138668 | 3995.094289 | 5802.732119 | -0.538501199 | 0.00328778  | 0.009932538 | HNRNPD      |
| ENSG00000273853 | 6.944867441 | 0           | 5.130080979  | 0.003290794 | 0.009940487 | AC023158.2  |
| ENSG00000187866 | 258.1305785 | 128.3847528 | 1.006113528  | 0.00329132  | 0.009940919 | FAM122A     |
| ENSG00000128567 | 556.6132986 | 257.8430566 | 1.109351587  | 0.003292503 | 0.009943337 | PODXL       |
| ENSG00000137818 | 17233.51608 | 27530.8712  | -0.675835736 | 0.003296532 | 0.009954348 | RPLP1       |
| ENSG00000101751 | 888.2626988 | 418.2660712 | 1.087157826  | 0.003300812 | 0.009966114 | POLI        |
| ENSG00000115946 | 266.2669294 | 559.7790367 | -1.072618842 | 0.003302681 | 0.009970597 | PNO1        |
| ENSG00000157992 | 41.50537506 | 11.14706589 | 1.897876819  | 0.003305249 | 0.00997719  | KRTCAP3     |
| ENSG00000180879 | 2097.628241 | 3388.978117 | -0.692097469 | 0.003314634 | 0.010004356 | SSR4        |
| ENSG00000134077 | 513.7003727 | 778.3795435 | -0.599847234 | 0.003319027 | 0.010016451 | THUMPD3     |
| ENSG00000198932 | 301.0434498 | 168.0447127 | 0.841602575  | 0.003320084 | 0.010018479 | GPRASP1     |
| ENSG00000287276 | 27.21122333 | 1.874739808 | 3.884336788  | 0.00332253  | 0.010024696 | BX664718.2  |
| ENSG00000180758 | 163.5623883 | 321.2797063 | -0.972972287 | 0.003323748 | 0.010027205 | GPR157      |
| ENSG00000090316 | 1132.752391 | 1697.374462 | -0.583407213 | 0.003325371 | 0.010030939 | MAEA        |
| ENSG00000006534 | 2096.626167 | 1093.973257 | 0.938758247  | 0.003327877 | 0.01003733  | ALDH3B1     |
| ENSG00000136944 | 10.44391269 | 0           | 5.717324957  | 0.003336454 | 0.010062032 | LMX1B       |
| ENSG00000225868 | 7.960625489 | 0           | 5.32534742   | 0.003337947 | 0.010065367 | AC016582.1  |
| ENSG00000133316 | 312.7372692 | 546.182616  | -0.805069634 | 0.003339095 | 0.010067661 | WDR74       |
| ENSG00000116030 | 1439.451495 | 2217.308512 | -0.623244974 | 0.003342187 | 0.010075812 | SUMO1       |

|                 |             |             |              |             |             |            |
|-----------------|-------------|-------------|--------------|-------------|-------------|------------|
| ENSG00000261187 | 7.250716047 | 0           | 5.192152329  | 0.003343807 | 0.010079527 | AC079322.1 |
| ENSG00000259570 | 11.70853534 | 0.743759607 | 4.01485224   | 0.003350314 | 0.010097969 | AC243562.1 |
| ENSG00000095383 | 329.8157549 | 1064.944888 | -1.691320731 | 0.003351576 | 0.010100602 | TBC1D2     |
| ENSG00000126790 | 432.0925033 | 631.1743426 | -0.546670366 | 0.003352662 | 0.010102705 | L3HYPDH    |
| ENSG00000166575 | 476.9699209 | 292.3931107 | 0.705988607  | 0.003356715 | 0.010113744 | TMEM135    |
| ENSG00000149311 | 2154.576601 | 1229.787663 | 0.809199387  | 0.00336137  | 0.010126594 | ATM        |
| ENSG00000105186 | 440.8392546 | 746.8506768 | -0.760275833 | 0.003364344 | 0.010134379 | ANKRD27    |
| ENSG00000288048 | 10.04730248 | 0.387220594 | 4.699871868  | 0.003366734 | 0.010140402 | AC104088.3 |
| ENSG00000177675 | 47.48004308 | 283.2757083 | -2.576336843 | 0.003368827 | 0.010145531 | CD163L1    |
| ENSG00000168079 | 878.0606158 | 19.8764989  | 5.46366856   | 0.003374295 | 0.01016082  | SCARA5     |
| ENSG00000188313 | 1052.553624 | 1888.701071 | -0.8436391   | 0.003391453 | 0.010211303 | PLSCR1     |
| ENSG00000203666 | 293.3721342 | 164.8454938 | 0.831577993  | 0.003397478 | 0.010228259 | EFCAB2     |
| ENSG00000279662 | 26.40868572 | 5.992655192 | 2.130801648  | 0.003402118 | 0.010241042 | AC131649.2 |
| ENSG00000143891 | 267.8562763 | 138.7899384 | 0.949011271  | 0.003405188 | 0.010249096 | GALM       |
| ENSG00000161204 | 991.0600662 | 1506.34653  | -0.603840168 | 0.003407725 | 0.010255542 | ABCF3      |
| ENSG00000100982 | 1022.768584 | 606.7694281 | 0.753685682  | 0.003408638 | 0.010257103 | PCIF1      |
| novel.221       | 33.47572726 | 11.81170499 | 1.502305557  | 0.003410312 | 0.010260951 | -          |
| ENSG00000279645 | 16.44573407 | 1.069617038 | 3.937223045  | 0.003412344 | 0.01026508  | AC016251.1 |
| ENSG00000241506 | 107.7389988 | 199.4581138 | -0.88988029  | 0.003412474 | 0.01026508  | PSMC1P1    |
| ENSG00000249364 | 16.79950641 | 0.713078025 | 4.552017267  | 0.003448754 | 0.010373013 | AC112206.2 |
| ENSG00000104983 | 219.4634176 | 350.016023  | -0.673830997 | 0.003450761 | 0.010377847 | CCDC61     |
| ENSG00000156049 | 30.5789195  | 6.359806691 | 2.25668388   | 0.003451692 | 0.010379445 | GNA14      |
| ENSG00000177830 | 1172.492547 | 2027.026325 | -0.789863027 | 0.003461659 | 0.010408213 | CHID1      |
| ENSG00000237419 | 16.92823349 | 0           | 6.414583545  | 0.003462483 | 0.010409486 | AL954642.1 |
| ENSG00000082701 | 821.1852057 | 1278.693147 | -0.638768485 | 0.003466732 | 0.010420376 | GSK3B      |
| ENSG00000280073 | 8.258880932 | 0           | 5.378607557  | 0.003466908 | 0.010420376 | AL157996.1 |
| ENSG00000134490 | 155.0389858 | 269.4139668 | -0.797131287 | 0.003471157 | 0.010431941 | TMEM241    |
| ENSG00000228288 | 24.22171613 | 107.7116418 | -2.153404218 | 0.003472743 | 0.010435501 | PCAT6      |
| ENSG00000172995 | 20.71403788 | 1.702418679 | 3.569541677  | 0.003474728 | 0.010440256 | ARPP21     |
| ENSG00000248360 | 12.11134252 | 0.713078025 | 4.078444191  | 0.003480636 | 0.010456799 | LINC00504  |
| ENSG00000168724 | 1239.813179 | 799.5706325 | 0.632753347  | 0.003481145 | 0.010457121 | DNAJC21    |
| ENSG00000169026 | 198.9255323 | 64.50507622 | 1.621608799  | 0.003487742 | 0.010475725 | SLC49A3    |
| ENSG00000105948 | 112.5163856 | 225.0463005 | -1.001364324 | 0.003489835 | 0.010480801 | TTC26      |
| ENSG00000198964 | 943.940847  | 403.494028  | 1.225491178  | 0.003494472 | 0.010493513 | SGMS1      |
| ENSG00000142541 | 25984.5452  | 46133.06931 | -0.828149281 | 0.003494987 | 0.010493846 | RPL13A     |
| ENSG00000279926 | 38.35662593 | 9.804653847 | 1.973592152  | 0.003500911 | 0.01051042  | AL138831.3 |
| novel.1018      | 6.667995298 | 0           | 5.070819567  | 0.003502843 | 0.010515004 | -          |
| ENSG00000087053 | 676.8446532 | 1076.056037 | -0.669132213 | 0.003514943 | 0.010550107 | MTMR2      |
| ENSG00000189180 | 698.9500195 | 395.7225525 | 0.82130627   | 0.003517494 | 0.010556545 | ZNF33A     |
| ENSG00000158122 | 423.9336303 | 268.6705924 | 0.658069828  | 0.003517961 | 0.010556727 | PRXL2C     |
| ENSG00000124194 | 10.15916265 | 0.336469917 | 4.718464603  | 0.003521271 | 0.01056544  | GDAP1L1    |
| ENSG00000238057 | 19.33433576 | 2.731897526 | 2.789606673  | 0.0035228   | 0.010568808 | ZEB2-AS1   |
| ENSG00000198373 | 909.1959087 | 590.2756079 | 0.622686055  | 0.003530131 | 0.010589578 | WWP2       |
| ENSG00000271046 | 7.614517581 | 0           | 5.261770399  | 0.003533922 | 0.010599727 | AL512631.1 |
| ENSG00000231246 | 61.51641178 | 6.614844348 | 3.2091155    | 0.003538087 | 0.010610995 | AL445426.1 |
| ENSG00000101425 | 37.23319558 | 2.395427609 | 3.937283818  | 0.00354228  | 0.010622342 | BPI        |
| ENSG00000105325 | 900.273148  | 1366.077373 | -0.601391082 | 0.003544779 | 0.010628609 | FZR1       |
| ENSG00000153443 | 370.7629134 | 609.0572711 | -0.715624644 | 0.003551152 | 0.010646491 | UBALD1     |
| ENSG00000172031 | 3.286109548 | 23.58913237 | -2.835839996 | 0.003553751 | 0.010653052 | EPHX4      |
| ENSG00000148358 | 1517.169321 | 2307.820096 | -0.605218451 | 0.003555212 | 0.010655831 | GPR107     |
| ENSG00000276663 | 18.74506203 | 1.793307549 | 3.386652791  | 0.003555498 | 0.010655831 | AC009090.3 |

|                 |             |             |              |             |             |            |
|-----------------|-------------|-------------|--------------|-------------|-------------|------------|
| novel.287       | 0           | 14.70903557 | -6.46180755  | 0.003558399 | 0.010663295 | -          |
| ENSG00000154229 | 2402.955751 | 1151.547575 | 1.061420304  | 0.003571516 | 0.010701367 | PRKCA      |
| ENSG00000258539 | 12.0458677  | 1.049547942 | 3.496339997  | 0.003588911 | 0.010752249 | AC068896.1 |
| ENSG00000189419 | 12.82383053 | 1.029478846 | 3.595170178  | 0.003595994 | 0.010772228 | SPATA41    |
| ENSG00000286107 | 8.667742899 | 0           | 5.450609915  | 0.003603805 | 0.01079438  | AC007655.2 |
| ENSG00000164011 | 283.4068887 | 170.955995  | 0.729937397  | 0.003619914 | 0.010841381 | ZNF691     |
| ENSG00000146151 | 28.91761537 | 1.874739808 | 3.969067012  | 0.003623082 | 0.010849619 | HMGCLL1    |
| ENSG00000220749 | 200.1085249 | 79.53033736 | 1.333915797  | 0.003626058 | 0.010856694 | RPL21P28   |
| ENSG00000260386 | 0           | 14.61069787 | -6.448361578 | 0.00362628  | 0.010856694 | LINC01225  |
| ENSG00000265203 | 10.74600035 | 0           | 5.758567769  | 0.003629512 | 0.010865117 | RBP3       |
| ENSG00000182771 | 80.16390232 | 12.93078843 | 2.637277091  | 0.003630921 | 0.010868084 | GRID1      |
| ENSG00000239857 | 45.47492488 | 97.89128521 | -1.104300253 | 0.003639005 | 0.010891026 | GET4       |
| novel.158       | 0           | 15.56922855 | -6.539687772 | 0.003642156 | 0.010899201 | -          |
| ENSG00000126070 | 822.5215884 | 459.7456192 | 0.839626908  | 0.003644798 | 0.010905851 | AGO3       |
| ENSG00000182162 | 85.50484909 | 10.83053667 | 2.987712683  | 0.003646981 | 0.010911124 | P2RY8      |
| ENSG00000143127 | 678.0372415 | 2442.731238 | -1.849181637 | 0.00364816  | 0.010913396 | ITGA10     |
| ENSG00000184523 | 12.16650342 | 0.387220594 | 4.978652274  | 0.003649087 | 0.010914913 | PTGER4P2   |
| ENSG00000232527 | 3.374292587 | 23.82068049 | -2.828696169 | 0.003658057 | 0.010940437 | AC245595.1 |
| ENSG00000198205 | 82.70296368 | 40.94490879 | 1.014325783  | 0.003658463 | 0.010940437 | ZXDA       |
| ENSG00000270210 | 9.305909278 | 0.356539013 | 4.59149153   | 0.003662509 | 0.010951278 | AC104695.3 |
| ENSG00000133958 | 14.69506452 | 0.774441189 | 4.316716082  | 0.003666191 | 0.010961024 | UNC79      |
| ENSG00000186352 | 107.1192811 | 245.7070824 | -1.198703882 | 0.003673808 | 0.010982534 | ANKRD37    |
| ENSG00000107147 | 14.83493224 | 1.702418679 | 3.07994101   | 0.003675298 | 0.010985723 | KCNT1      |
| novel.1087      | 11.5409448  | 0           | 5.86372544   | 0.003679151 | 0.010995976 | -          |
| ENSG00000267640 | 49.93868424 | 8.338487999 | 2.572043942  | 0.003683306 | 0.011006093 | AC016582.3 |
| ENSG00000139163 | 1509.638732 | 944.2738832 | 0.677144897  | 0.003683713 | 0.011006093 | ETNK1      |
| ENSG00000182208 | 789.6096621 | 446.4054996 | 0.823250023  | 0.003683807 | 0.011006093 | MOB2       |
| ENSG00000275026 | 8.870649415 | 0           | 5.481859854  | 0.003685642 | 0.01101031  | GXYLT1P4   |
| ENSG00000226194 | 17.19751246 | 1.049547942 | 4.01230792   | 0.003689272 | 0.011019887 | LINC02519  |
| ENSG00000137033 | 142.539195  | 33.44594956 | 2.090095873  | 0.003692733 | 0.011028957 | IL33       |
| ENSG00000182173 | 427.7173974 | 214.9157893 | 0.991850494  | 0.003695159 | 0.011033883 | TSEN54     |
| ENSG00000253369 | 7.542703246 | 0           | 5.249242858  | 0.003695232 | 0.011033883 | AC022034.3 |
| ENSG00000231881 | 3.308817768 | 34.23532277 | -3.366854096 | 0.003696024 | 0.01103498  | AL109615.2 |
| ENSG00000133135 | 9.740271497 | 45.99614868 | -2.23818764  | 0.003700015 | 0.011045627 | RNF128     |
| ENSG00000179532 | 471.5020145 | 204.1475832 | 1.208626195  | 0.003702189 | 0.011050524 | DNHD1      |
| ENSG00000148229 | 587.1737853 | 1079.168678 | -0.878388989 | 0.003702506 | 0.011050524 | POLE3      |
| ENSG00000250159 | 28.39994252 | 8.846123169 | 1.674433728  | 0.003718077 | 0.011095723 | AC106791.1 |
| ENSG00000167600 | 48.2277758  | 149.9407631 | -1.635350617 | 0.00371929  | 0.011098066 | CYP2S1     |
| ENSG00000196873 | 233.3726573 | 74.66703977 | 1.64362284   | 0.003721483 | 0.011103337 | CBWD3      |
| ENSG00000171700 | 614.370348  | 301.7172493 | 1.026609231  | 0.003736498 | 0.011146855 | RGS19      |
| ENSG00000088682 | 526.609879  | 830.1963774 | -0.657009241 | 0.003741979 | 0.011161923 | COQ9       |
| ENSG00000248810 | 60.85761825 | 11.30175807 | 2.424905294  | 0.003743221 | 0.011164346 | LINC02432  |
| ENSG00000223797 | 109.9980675 | 47.26000097 | 1.214386847  | 0.003751367 | 0.011187357 | ENTPD3-AS1 |
| ENSG00000254991 | 0           | 7.428139459 | -5.469806506 | 0.003758014 | 0.011205894 | AC124276.1 |
| ENSG00000276291 | 272.5953423 | 168.6127307 | 0.693200487  | 0.003758593 | 0.011206334 | FRG1HP     |
| ENSG00000078319 | 156.2555425 | 275.906436  | -0.820558572 | 0.00376285  | 0.011217739 | PMS2P1     |
| ENSG00000111863 | 1.846374476 | 16.99666887 | -3.2089648   | 0.003763777 | 0.011219216 | ADTRP      |
| ENSG00000183513 | 844.6219516 | 515.014959  | 0.714258914  | 0.003772218 | 0.011243089 | COA5       |
| ENSG00000162980 | 1033.262383 | 607.6949652 | 0.765753894  | 0.003777187 | 0.011256606 | ARL5A      |
| ENSG00000254139 | 159.3695591 | 1.069617038 | 7.216368815  | 0.003779097 | 0.011261007 | AC104051.2 |
| ENSG00000162728 | 8.379587918 | 0           | 5.401765897  | 0.003783642 | 0.011273259 | KCNJ9      |

|                 |             |             |              |             |             |            |
|-----------------|-------------|-------------|--------------|-------------|-------------|------------|
| ENSG00000149541 | 1158.872933 | 2022.80696  | -0.803800999 | 0.003787446 | 0.011282641 | B3GAT3     |
| ENSG00000159346 | 1632.534205 | 2546.897681 | -0.641610195 | 0.00378766  | 0.011282641 | ADIPOR1    |
| ENSG00000176101 | 799.7740086 | 1264.61199  | -0.661180789 | 0.00379123  | 0.011291982 | SSNA1      |
| ENSG00000158488 | 19.41639274 | 0           | 6.612499001  | 0.003794591 | 0.011300694 | CD1E       |
| ENSG00000114933 | 29.50359887 | 8.938167914 | 1.72195289   | 0.003796113 | 0.011303934 | INO80D     |
| ENSG00000180229 | 627.7414148 | 148.2196064 | 2.082394829  | 0.00380584  | 0.0113316   | HERC2P3    |
| ENSG00000185829 | 29.94032585 | 5.502648973 | 2.454371276  | 0.003806949 | 0.0113336   | ARL17A     |
| ENSG00000198792 | 1532.146834 | 2673.619606 | -0.803127064 | 0.003809387 | 0.011339561 | TMEM184B   |
| ENSG00000275964 | 88.24341202 | 43.15012953 | 1.032644272  | 0.003810045 | 0.011340218 | AL355001.2 |
| ENSG00000083720 | 460.8321277 | 1014.559822 | -1.138891853 | 0.003810807 | 0.01134119  | OXCT1      |
| ENSG00000182308 | 27.41029763 | 4.646775526 | 2.559807065  | 0.003813375 | 0.01134753  | DCAF4L1    |
| ENSG00000149150 | 132.0880458 | 308.6006975 | -1.224538708 | 0.003814202 | 0.011348691 | SLC43A1    |
| ENSG00000055130 | 1159.688834 | 1721.564208 | -0.569906841 | 0.003815946 | 0.011352582 | CUL1       |
| ENSG00000159314 | 40.73174229 | 2.659793482 | 3.958558737  | 0.003816422 | 0.011352697 | ARHGAP27   |
| ENSG00000273650 | 17.24912588 | 0           | 6.441680562  | 0.003826203 | 0.01138049  | AC100793.4 |
| ENSG00000134709 | 21.44343623 | 2.171071533 | 3.311061111  | 0.003827765 | 0.011382812 | HOOK1      |
| ENSG00000103043 | 563.6919396 | 1071.791611 | -0.926690352 | 0.00382786  | 0.011382812 | VAC14      |
| novel.634       | 3.926783224 | 23.46846101 | -2.572933651 | 0.003831794 | 0.011393207 | -          |
| ENSG00000080189 | 942.8361768 | 1478.165226 | -0.648676104 | 0.003833323 | 0.011396449 | SLC35C2    |
| ENSG00000163875 | 1148.207211 | 770.5206935 | 0.575847567  | 0.003836397 | 0.011404004 | MEAF6      |
| ENSG00000134986 | 50.44805227 | 104.1852808 | -1.048821795 | 0.003836742 | 0.011404004 | NREP       |
| ENSG00000115598 | 2.158491326 | 28.32466059 | -3.723371502 | 0.003840374 | 0.011413492 | IL1RL2     |
| ENSG00000159063 | 416.2709317 | 656.7424599 | -0.658290439 | 0.003844254 | 0.011423718 | ALG8       |
| ENSG00000147647 | 13.83575636 | 0.387220594 | 5.161194877  | 0.00384966  | 0.01143774  | DPYS       |
| ENSG00000266777 | 21.36187744 | 4.677457107 | 2.194015756  | 0.003849853 | 0.01143774  | SH3GL1P1   |
| ENSG00000086475 | 776.8405058 | 1272.749915 | -0.712541271 | 0.003852009 | 0.011442837 | SEPHS1     |
| ENSG00000072135 | 1258.258429 | 840.8458938 | 0.58137096   | 0.003852892 | 0.011444151 | PTPN18     |
| ENSG00000248008 | 76.58641883 | 153.4248622 | -1.00406368  | 0.00385815  | 0.011458459 | NRAV       |
| ENSG00000198131 | 217.9600743 | 351.2252246 | -0.68850565  | 0.003862129 | 0.011468963 | ZNF544     |
| ENSG00000158545 | 814.3816894 | 1269.618759 | -0.640602467 | 0.003866654 | 0.011481091 | ZC3H18     |
| ENSG00000178175 | 8.592452353 | 0           | 5.435544933  | 0.003867612 | 0.011481974 | ZNF366     |
| ENSG00000147224 | 471.4991631 | 902.7374578 | -0.937435325 | 0.003867835 | 0.011481974 | PRPS1      |
| ENSG00000230067 | 10.72705308 | 0.336469917 | 4.793698139  | 0.003872299 | 0.01149391  | HSPD1P6    |
| ENSG00000112378 | 391.0479694 | 2254.747821 | -2.52766031  | 0.003874184 | 0.011498193 | PERP       |
| ENSG00000253738 | 722.0346981 | 375.9179133 | 0.940962798  | 0.003874864 | 0.011498898 | OTUD6B-AS1 |
| ENSG00000254802 | 8.257698554 | 0           | 5.378464495  | 0.003876838 | 0.01150344  | AC022182.2 |
| ENSG00000250539 | 31.28442726 | 8.396255142 | 1.907198915  | 0.003897961 | 0.011563917 | KRT8P33    |
| ENSG00000160796 | 884.0647693 | 504.8692586 | 0.808315379  | 0.003898109 | 0.011563917 | NBEAL2     |
| ENSG00000287632 | 7.019189073 | 0           | 5.143960761  | 0.003900185 | 0.011568753 | AC112253.1 |
| ENSG00000130590 | 79.95945777 | 31.77896436 | 1.325860848  | 0.00390332  | 0.01157673  | SAMD10     |
| ENSG00000033050 | 340.9301173 | 607.3933464 | -0.833519235 | 0.003907545 | 0.011587939 | ABCF2      |
| ENSG00000242540 | 0           | 6.706889093 | -5.329229885 | 0.003914208 | 0.011606372 | AC010729.2 |
| ENSG00000223774 | 14.67876709 | 0.672939833 | 4.388294452  | 0.003922866 | 0.011630717 | AL513217.1 |
| ENSG00000204581 | 6.995227205 | 0           | 5.139483502  | 0.003926772 | 0.011640969 | ACOXL-AS1  |
| ENSG00000157851 | 11.38653149 | 0           | 5.842064414  | 0.003939548 | 0.011677103 | DPYSL5     |
| ENSG00000080839 | 174.8852685 | 323.8421077 | -0.889173194 | 0.003939859 | 0.011677103 | RBL1       |
| ENSG00000276251 | 7.771651652 | 0           | 5.293391439  | 0.003940954 | 0.011679014 | AC007786.2 |
| ENSG00000093072 | 977.9933473 | 285.749909  | 1.774434415  | 0.003945088 | 0.011689933 | ADA2       |
| ENSG00000252498 | 18.11824976 | 1.386017859 | 3.684223749  | 0.003945679 | 0.01169035  | RNU6-1016P |
| novel.766       | 6.903283219 | 0           | 5.122233594  | 0.003952134 | 0.011706898 | -          |
| ENSG00000145241 | 477.4502965 | 297.2858525 | 0.682645609  | 0.003952165 | 0.011706898 | CENPC      |

|                 |             |             |              |             |             |            |
|-----------------|-------------|-------------|--------------|-------------|-------------|------------|
| ENSG00000099998 | 681.7439214 | 3486.562877 | -2.354588595 | 0.003953596 | 0.011709801 | GGT5       |
| ENSG00000156697 | 259.8573297 | 565.0191176 | -1.12105993  | 0.003955696 | 0.011714687 | UTP14A     |
| ENSG00000214851 | 11.92773929 | 0.693008929 | 4.067613067  | 0.00396356  | 0.011736637 | LINC00612  |
| ENSG00000273523 | 12.33151539 | 0.672939833 | 4.131860612  | 0.003967111 | 0.011745813 | AL139082.1 |
| ENSG00000124214 | 1651.174974 | 2353.849602 | -0.511619541 | 0.003973646 | 0.011763821 | STAU1      |
| ENSG00000106477 | 231.6444235 | 409.1298746 | -0.821321883 | 0.003975044 | 0.01176662  | CEP41      |
| ENSG00000211772 | 39.93060122 | 3.108505634 | 3.667977512  | 0.003976087 | 0.011768365 | TRBC2      |
| ENSG00000173705 | 138.5028746 | 439.123143  | -1.665130337 | 0.003978854 | 0.01177435  | SUSD5      |
| ENSG00000152382 | 362.2776633 | 200.5073578 | 0.853439416  | 0.003979015 | 0.01177435  | TADA1      |
| ENSG00000109189 | 845.0523645 | 428.8154775 | 0.978425962  | 0.003979554 | 0.011774603 | USP46      |
| ENSG00000247516 | 127.2805437 | 71.16656164 | 0.837842859  | 0.003982085 | 0.011780751 | MIR4458HG  |
| ENSG00000136522 | 470.4300676 | 749.4682556 | -0.672259572 | 0.003989935 | 0.011802632 | MRPL47     |
| ENSG00000168427 | 8.485393311 | 0.356539013 | 4.456738061  | 0.003995074 | 0.011816487 | KLHL30     |
| ENSG00000162733 | 2370.942025 | 3770.166221 | -0.669186591 | 0.003997594 | 0.011822065 | DDR2       |
| ENSG00000197063 | 744.0938205 | 1360.502209 | -0.870396379 | 0.00399787  | 0.011822065 | MAFG       |
| ENSG00000237638 | 39.72218156 | 9.245112124 | 2.099730649  | 0.003998918 | 0.011823818 | LINC02245  |
| ENSG00000167244 | 123.5426898 | 11.22148168 | 3.457479039  | 0.003999435 | 0.011824001 | IGF2       |
| novel.202       | 6.696971762 | 0           | 5.076447597  | 0.004000426 | 0.011825586 | -          |
| ENSG00000277566 | 2.111892509 | 16.46549698 | -2.957544714 | 0.004007286 | 0.011844517 | AC089999.2 |
| ENSG00000249751 | 12.84897478 | 0.723690511 | 4.157328627  | 0.004009207 | 0.011848847 | ECSCR      |
| ENSG00000232591 | 8.127931293 | 0           | 5.357212825  | 0.004012613 | 0.011856216 | LINC02642  |
| ENSG00000196542 | 8.127931293 | 0           | 5.357212825  | 0.004012613 | 0.011856216 | SPTSSB     |
| ENSG00000078328 | 10.14809328 | 0           | 5.675801745  | 0.004014502 | 0.011859185 | RBFOX1     |
| ENSG00000112305 | 79.39923177 | 141.1395769 | -0.830100674 | 0.00401481  | 0.011859185 | SMAP1      |
| ENSG00000162222 | 290.3989237 | 523.8433717 | -0.851376722 | 0.004014987 | 0.011859185 | TTC9C      |
| ENSG00000215039 | 576.4511506 | 319.1392348 | 0.852895646  | 0.004015735 | 0.011860046 | CD27-AS1   |
| ENSG00000133063 | 6.625157428 | 0           | 5.062495157  | 0.004018527 | 0.01186694  | CHIT1      |
| ENSG00000159377 | 3025.204203 | 4330.878276 | -0.517639965 | 0.004019456 | 0.011868334 | PSMB4      |
| ENSG00000162300 | 102.4476998 | 192.8292709 | -0.911263225 | 0.004027775 | 0.011890552 | ZFPL1      |
| ENSG00000255153 | 44.38040007 | 14.63436299 | 1.608328619  | 0.004027895 | 0.011890552 | TOLLIP-AS1 |
| ENSG00000162753 | 7.017935424 | 0           | 5.143740634  | 0.004030412 | 0.011896629 | SLC9C2     |
| ENSG00000152904 | 431.2267844 | 267.9591841 | 0.687242975  | 0.004043602 | 0.011934208 | GGPS1      |
| ENSG00000271228 | 13.89600313 | 1.161661783 | 3.646538889  | 0.00404776  | 0.011945123 | AL121655.1 |
| ENSG00000129534 | 311.0881296 | 780.4112272 | -1.327129345 | 0.004048302 | 0.011945365 | MIS18BP1   |
| ENSG00000205177 | 3.269740843 | 19.42290645 | -2.559531289 | 0.00405924  | 0.011976074 | C11orf91   |
| ENSG00000229415 | 19.3562176  | 0           | 6.608101984  | 0.004059631 | 0.011976074 | SFTA3      |
| ENSG00000154734 | 897.5646014 | 2083.78885  | -1.215253649 | 0.004063774 | 0.011986934 | ADAMTS1    |
| ENSG00000078295 | 33.51147017 | 2.375358513 | 3.792883877  | 0.004068388 | 0.01199918  | ADCY2      |
| ENSG00000174804 | 1042.866807 | 416.0450447 | 1.325170406  | 0.004070286 | 0.012003416 | FZD4       |
| ENSG00000182272 | 2603.129272 | 818.3733673 | 1.669662869  | 0.00407612  | 0.012019257 | B4GALNT4   |
| ENSG00000050030 | 10.3997499  | 0.356539013 | 4.749167411  | 0.004079505 | 0.012027874 | NEXMIF     |
| ENSG00000115084 | 1135.002    | 1734.451916 | -0.611911512 | 0.004082191 | 0.012034428 | SLC35F5    |
| ENSG00000186056 | 40.30719615 | 10.49894705 | 1.931453973  | 0.004084308 | 0.012039303 | MATN1-AS1  |
| ENSG00000286681 | 48.06498639 | 15.55185639 | 1.622816948  | 0.004101397 | 0.012088304 | AF235103.3 |
| ENSG00000225400 | 11.50723847 | 1.41669944  | 3.009208737  | 0.004106365 | 0.012101572 | RAB28P5    |
| ENSG00000152683 | 424.794077  | 674.5917914 | -0.667713105 | 0.004107043 | 0.012102198 | SLC30A6    |
| ENSG00000126391 | 1640.696289 | 917.6316919 | 0.838023786  | 0.004112212 | 0.012116057 | FRMD8      |
| ENSG00000156858 | 919.810149  | 573.1467907 | 0.682892395  | 0.004114127 | 0.012120324 | PRR14      |
| ENSG00000169826 | 1560.481147 | 837.6160274 | 0.897656494  | 0.004116125 | 0.012124835 | CSGALNACT2 |
| ENSG00000134317 | 27.9799399  | 2.099095884 | 3.722191808  | 0.004122286 | 0.012141607 | GRHL1      |
| ENSG00000187239 | 1093.442698 | 484.2680074 | 1.174691964  | 0.004124429 | 0.012146542 | FNBP1      |

|                 |             |             |              |             |             |            |
|-----------------|-------------|-------------|--------------|-------------|-------------|------------|
| ENSG00000268069 | 0.586481695 | 11.22148168 | -4.231195191 | 0.004127995 | 0.012155667 | AC004466.1 |
| ENSG00000099949 | 860.4990843 | 490.2319891 | 0.811871317  | 0.004128548 | 0.012155917 | LZTR1      |
| ENSG00000164904 | 1206.463956 | 1720.678166 | -0.512124659 | 0.004136129 | 0.012176858 | ALDH7A1    |
| ENSG00000108784 | 1062.827897 | 741.3117553 | 0.519766497  | 0.004142423 | 0.012194007 | NAGLU      |
| ENSG00000160972 | 710.8644401 | 348.5074887 | 1.028860043  | 0.004145038 | 0.012200321 | PPP1R16A   |
| novel.650       | 40.73808216 | 90.94510803 | -1.161284973 | 0.00414862  | 0.012209481 | -          |
| ENSG00000162704 | 3535.265401 | 6211.095339 | -0.813093198 | 0.004152269 | 0.012218837 | ARPC5      |
| ENSG00000272777 | 21.76719193 | 5.697479343 | 1.928986057  | 0.004153564 | 0.012221263 | AC019131.2 |
| ENSG00000267547 | 82.44844375 | 31.57480577 | 1.378616926  | 0.004158054 | 0.012233088 | AC060766.4 |
| ENSG00000268673 | 8.899269874 | 0           | 5.489182746  | 0.004161561 | 0.01224202  | AC004597.1 |
| novel.468       | 446.7496737 | 1157.132475 | -1.37320392  | 0.004171034 | 0.012268497 | -          |
| ENSG00000172733 | 61.9066119  | 20.25986668 | 1.613334871  | 0.004173625 | 0.012274729 | PURG       |
| ENSG00000136636 | 1819.983536 | 977.0710372 | 0.897375101  | 0.004174185 | 0.012274985 | KCTD3      |
| ENSG00000227725 | 12.0458677  | 1.467450118 | 3.058887749  | 0.004179668 | 0.012289719 | GCOM2      |
| ENSG00000130811 | 2242.376887 | 3447.352117 | -0.620448414 | 0.004182161 | 0.012295657 | EIF3G      |
| ENSG00000115902 | 816.3279573 | 241.1085831 | 1.758624592  | 0.004190059 | 0.012317484 | SLC1A4     |
| ENSG00000224934 | 77.53022035 | 38.64512195 | 1.003187358  | 0.004191126 | 0.012319225 | AL391684.1 |
| ENSG00000272574 | 4.51201127  | 19.35324256 | -2.097005264 | 0.004196388 | 0.012333299 | AL596325.2 |
| ENSG00000142327 | 1663.460405 | 1019.059446 | 0.707298227  | 0.004209484 | 0.012370387 | RNPEPL1    |
| ENSG00000146530 | 37.67673279 | 6.544024575 | 2.509961726  | 0.004217539 | 0.012392658 | VWDE       |
| ENSG00000280145 | 25.72699729 | 4.199347643 | 2.600655968  | 0.004222602 | 0.012406132 | CU638689.4 |
| ENSG00000087263 | 653.6364288 | 1139.981306 | -0.802777624 | 0.004223172 | 0.012406404 | OGFOD1     |
| ENSG00000244699 | 8.72193488  | 0.356539013 | 4.49777384   | 0.004225515 | 0.012411883 | AC139453.2 |
| ENSG00000274220 | 38.61351062 | 11.9746979  | 1.679584812  | 0.004231198 | 0.01242717  | AC009163.6 |
| ENSG00000256594 | 37.19111316 | 12.30171121 | 1.585858016  | 0.004235365 | 0.012438004 | AC010186.2 |
| ENSG00000120725 | 804.0920433 | 1462.879289 | -0.863494276 | 0.00424221  | 0.012456696 | SIL1       |
| ENSG00000272750 | 55.22704903 | 17.5800041  | 1.651153136  | 0.004244621 | 0.012462367 | AL592148.3 |
| ENSG00000178028 | 920.843245  | 546.7686013 | 0.751754559  | 0.004246998 | 0.012467938 | DMAP1      |
| ENSG00000143155 | 558.9313329 | 897.8972049 | -0.684260414 | 0.004251932 | 0.012481013 | TIPRL      |
| ENSG00000163017 | 115.2006852 | 34.95957404 | 1.716205644  | 0.004253433 | 0.012484008 | ACTG2      |
| ENSG00000217716 | 34.64019985 | 82.29672209 | -1.247235386 | 0.004258424 | 0.012497245 | RPS10P3    |
| ENSG00000184967 | 277.0937052 | 498.6673678 | -0.848203934 | 0.004261644 | 0.012505283 | NOC4L      |
| ENSG00000114503 | 1440.038974 | 2211.663209 | -0.619043726 | 0.004262565 | 0.012506574 | NCBP2      |
| ENSG00000113645 | 128.0523804 | 429.5616522 | -1.745747688 | 0.004266807 | 0.012517605 | WWC1       |
| ENSG00000285954 | 7.628378988 | 0           | 5.264240944  | 0.004278187 | 0.012549574 | AC119428.3 |
| ENSG00000232377 | 14.40816319 | 1.069617038 | 3.746019904  | 0.004279172 | 0.012551045 | AC016910.1 |
| novel.544       | 11.93400753 | 0.693008929 | 4.068743478  | 0.004280405 | 0.012551882 | -          |
| ENSG00000242258 | 14.03050025 | 0.774441189 | 4.250366517  | 0.004280423 | 0.012551882 | LINC00996  |
| ENSG00000100902 | 69.61737606 | 139.6447372 | -1.003207315 | 0.004291168 | 0.012581969 | PSMA6      |
| ENSG00000121775 | 249.9273289 | 389.7614436 | -0.641369033 | 0.004291959 | 0.01258287  | TMEM39B    |
| ENSG00000080854 | 53.62151871 | 12.56363693 | 2.10274808   | 0.004299122 | 0.012602446 | IGSF9B     |
| ENSG00000188611 | 8.168190595 | 29.18613784 | -1.833429001 | 0.004303307 | 0.012613291 | ASAH2      |
| ENSG00000129245 | 1268.674664 | 1781.035707 | -0.489275509 | 0.004308311 | 0.012626534 | FXR2       |
| ENSG00000056558 | 699.0113071 | 277.982449  | 1.331152302  | 0.004310461 | 0.01263141  | TRAF1      |
| ENSG00000259658 | 100.627581  | 40.76886325 | 1.30695268   | 0.004316181 | 0.012646746 | AC027559.1 |
| ENSG00000268001 | 82.12951667 | 27.89126564 | 1.556428412  | 0.004318107 | 0.012650963 | CARD8-AS1  |
| ENSG00000247199 | 33.74500624 | 8.795244097 | 1.95050765   | 0.004319327 | 0.012653109 | AC011346.1 |
| ENSG00000091622 | 104.2915663 | 22.37556404 | 2.221118358  | 0.004321406 | 0.012657773 | PITPNM3    |
| ENSG00000287853 | 14.54545234 | 2.51699806  | 2.531995195  | 0.004326473 | 0.012671188 | AL031668.2 |
| ENSG00000239213 | 121.2008532 | 60.52340651 | 1.0041374    | 0.004330861 | 0.012682608 | NCK1-DT    |
| ENSG00000167965 | 618.009633  | 940.8335911 | -0.606450301 | 0.004332706 | 0.01268658  | MLST8      |

|                 |             |             |              |             |             |             |
|-----------------|-------------|-------------|--------------|-------------|-------------|-------------|
| ENSG00000136866 | 107.4955482 | 38.97542731 | 1.468608684  | 0.004333892 | 0.012688623 | ZFP37       |
| ENSG00000154721 | 638.9615767 | 166.284176  | 1.943011744  | 0.004338844 | 0.01270169  | JAM2        |
| ENSG00000138814 | 588.3218896 | 889.1718215 | -0.596011716 | 0.004339663 | 0.012702656 | PPP3CA      |
| ENSG00000113456 | 373.927889  | 618.2886667 | -0.725945635 | 0.004351502 | 0.012735875 | RAD1        |
| ENSG00000111652 | 1232.645401 | 1877.840893 | -0.607487283 | 0.004357753 | 0.012752735 | COPS7A      |
| ENSG00000159212 | 109.3205666 | 19.25862927 | 2.509035527  | 0.004380374 | 0.012817492 | CLIC6       |
| ENSG00000287825 | 35.56394264 | 12.20953807 | 1.542074966  | 0.004381618 | 0.012819686 | AL035587.2  |
| ENSG00000271270 | 45.21964985 | 119.8527187 | -1.406259061 | 0.004382855 | 0.012821861 | TMCC1-AS1   |
| ENSG00000240661 | 5.087138855 | 26.07801739 | -2.355321306 | 0.00438592  | 0.012829385 | AC063952.1  |
| ENSG00000263266 | 808.5903079 | 1349.651432 | -0.739232022 | 0.00438684  | 0.01283063  | RPS7P1      |
| ENSG00000153029 | 629.7804231 | 197.0086903 | 1.67554029   | 0.004387669 | 0.01283161  | MR1         |
| ENSG00000102119 | 996.3955704 | 1577.634431 | -0.662993627 | 0.004388651 | 0.012833039 | EMD         |
| ENSG00000249637 | 19.74480738 | 3.587770973 | 2.459984804  | 0.004389569 | 0.012834278 | AC008438.1  |
| ENSG00000205060 | 443.0827097 | 712.397817  | -0.685563809 | 0.004391284 | 0.012837848 | SLC35B4     |
| ENSG00000105369 | 27.33919496 | 2.578361223 | 3.418748431  | 0.004391812 | 0.012837946 | CD79A       |
| ENSG00000281501 | 45.35436044 | 17.18088675 | 1.409175168  | 0.004395679 | 0.012847803 | SEPSECS-AS1 |
| ENSG00000230797 | 16.99342357 | 42.8539262  | -1.336742964 | 0.004396666 | 0.012849243 | YY2         |
| ENSG00000137267 | 1579.242245 | 849.7891773 | 0.893703965  | 0.004416093 | 0.012904567 | TUBB2A      |
| ENSG00000120509 | 563.5508023 | 854.5365769 | -0.600707796 | 0.004416656 | 0.012904761 | PDZD11      |
| ENSG00000156508 | 126271.643  | 192299.821  | -0.606827371 | 0.004422959 | 0.012921724 | EEF1A1      |
| ENSG00000196646 | 198.300587  | 103.7693864 | 0.935406406  | 0.004425195 | 0.012926803 | ZNF136      |
| ENSG00000247903 | 26.46155279 | 7.092953812 | 1.893671106  | 0.004435108 | 0.012954305 | AC024896.1  |
| ENSG00000105426 | 3245.947927 | 1407.115478 | 1.206076047  | 0.004436335 | 0.012956431 | PTPRS       |
| ENSG00000136696 | 0           | 7.040918865 | -5.392703494 | 0.004438011 | 0.012959871 | IL36B       |
| ENSG00000275450 | 11.98032161 | 0.743759607 | 4.046144879  | 0.004440208 | 0.012964829 | AL845472.1  |
| ENSG00000232938 | 21.05756722 | 2.731897526 | 2.915198747  | 0.004443162 | 0.012971997 | RPL23AP87   |
| ENSG00000287759 | 8.719427583 | 0.356539013 | 4.497384132  | 0.004444862 | 0.012975502 | AL353151.2  |
| ENSG00000184347 | 296.5539601 | 58.7392516  | 2.337662193  | 0.00445804  | 0.013012507 | SLIT3       |
| ENSG00000177731 | 183.116826  | 475.5350737 | -1.376265919 | 0.004465054 | 0.013031519 | FLII        |
| ENSG00000175984 | 78.52968061 | 30.12614048 | 1.37806352   | 0.004468332 | 0.01303962  | DENND2C     |
| ENSG00000283633 | 25.5307863  | 1.396630344 | 4.176088931  | 0.004478171 | 0.013066864 | AP000547.3  |
| ENSG00000119778 | 326.1182489 | 154.7087364 | 1.074051526  | 0.004484502 | 0.013083869 | ATAD2B      |
| ENSG00000076650 | 295.2761765 | 186.4288121 | 0.664203556  | 0.004495092 | 0.013113293 | GPATCH1     |
| ENSG00000251664 | 7.973233248 | 0           | 5.327602607  | 0.004504735 | 0.013139948 | PCDHA12     |
| ENSG00000159256 | 746.5424335 | 454.0964504 | 0.717655632  | 0.004508073 | 0.01314821  | MORC3       |
| ENSG00000095564 | 1883.846043 | 1085.774725 | 0.795144429  | 0.004510084 | 0.013152598 | BTA1        |
| ENSG00000273341 | 15.63803932 | 0.713078025 | 4.44699733   | 0.004512042 | 0.013156832 | AC004921.1  |
| novel.488       | 5.452194037 | 22.71781333 | -2.058009773 | 0.004519276 | 0.013176446 | -           |
| ENSG00000254585 | 25.14810876 | 3.506338714 | 2.829274971  | 0.004520319 | 0.013177834 | MAGEL2      |
| ENSG00000232053 | 7.345167331 | 0           | 5.209256763  | 0.004520767 | 0.013177834 | AC078845.1  |
| ENSG00000122482 | 853.7859413 | 555.5499621 | 0.620251171  | 0.00452353  | 0.013184171 | ZNF644      |
| novel.565       | 6.374754451 | 0           | 5.005698951  | 0.004523955 | 0.013184171 | -           |
| ENSG00000226403 | 6.362146692 | 0           | 5.003146143  | 0.00452666  | 0.013190575 | AL392089.1  |
| ENSG00000158158 | 320.2914416 | 177.7622021 | 0.849775772  | 0.004529395 | 0.013196848 | CNNM4       |
| ENSG00000147119 | 113.5655214 | 349.5454439 | -1.622399252 | 0.004530129 | 0.013196848 | CHST7       |
| ENSG00000112306 | 7279.77512  | 14374.89998 | -0.981598526 | 0.004530337 | 0.013196848 | RPS12       |
| ENSG00000279187 | 1.524157165 | 11.14822176 | -2.876173983 | 0.004538486 | 0.013219104 | AC027601.5  |
| ENSG00000286254 | 6.694464465 | 0           | 5.075998575  | 0.004542113 | 0.013227112 | AC091889.1  |
| ENSG00000274925 | 75.55407861 | 37.19774093 | 1.0212578    | 0.004542254 | 0.013227112 | ZKSCAN2-DT  |
| ENSG00000086544 | 373.2142465 | 590.0069571 | -0.660666684 | 0.004547137 | 0.013239696 | ITPKC       |
| ENSG00000273509 | 6.679349408 | 0           | 5.073053403  | 0.004547594 | 0.013239696 | CNTNAP3P1   |

|                 |             |             |              |             |             |            |
|-----------------|-------------|-------------|--------------|-------------|-------------|------------|
| ENSG00000181444 | 223.5317495 | 86.26302774 | 1.37638386   | 0.004558619 | 0.013270305 | ZNF467     |
| ENSG00000255135 | 53.706439   | 108.6441612 | -1.018171758 | 0.004561154 | 0.013276197 | AP002360.1 |
| ENSG00000100292 | 809.7405342 | 427.8755564 | 0.92053798   | 0.004565601 | 0.013287654 | HMOX1      |
| ENSG00000077147 | 3356.652541 | 5018.151297 | -0.580121158 | 0.004566249 | 0.01328805  | TM9SF3     |
| ENSG00000100612 | 1257.857217 | 815.3041386 | 0.625608764  | 0.004567022 | 0.013288811 | DHRS7      |
| ENSG00000255222 | 8.034662387 | 0           | 5.341702677  | 0.004569383 | 0.013294191 | SETP17     |
| ENSG00000271447 | 6.61129602  | 0           | 5.059739181  | 0.004571526 | 0.013296837 | MMP28      |
| ENSG00000270806 | 6.61129602  | 0           | 5.059739181  | 0.004571526 | 0.013296837 | C17orf50   |
| ENSG00000257800 | 36.11607727 | 10.3029608  | 1.805661475  | 0.004571827 | 0.013296837 | FNBP1P1    |
| ENSG00000144724 | 391.1015645 | 1231.172281 | -1.654533974 | 0.004573022 | 0.013298822 | PTPRG      |
| novel.198       | 19.42320298 | 0           | 6.614075146  | 0.004575052 | 0.013303238 | -          |
| ENSG00000197965 | 1059.926407 | 4093.527432 | -1.949446101 | 0.004576831 | 0.01330692  | MPZL1      |
| ENSG00000240445 | 88.21185699 | 153.8900002 | -0.803720251 | 0.004579581 | 0.013313427 | FOXO3B     |
| ENSG00000272158 | 11.19888257 | 0.774441189 | 3.931348564  | 0.004581434 | 0.013316247 | AL139022.2 |
| ENSG00000132965 | 546.0628696 | 87.67698307 | 2.640100244  | 0.004581576 | 0.013316247 | ALOX5AP    |
| ENSG00000255395 | 9.520098632 | 0           | 5.583670621  | 0.004586685 | 0.013329604 | AP001972.4 |
| ENSG00000132423 | 111.594039  | 200.8722447 | -0.848791698 | 0.004588312 | 0.013332841 | COQ3       |
| ENSG00000079385 | 25.97607535 | 5.064677702 | 2.361659772  | 0.004611504 | 0.013398734 | CEACAM1    |
| ENSG00000136378 | 751.973643  | 1073.429704 | -0.513649611 | 0.004612282 | 0.013399496 | ADAMTS7    |
| ENSG00000215883 | 174.4548807 | 78.52670666 | 1.148559132  | 0.004613462 | 0.013401425 | CYB5RL     |
| ENSG00000138594 | 910.7467166 | 1837.402485 | -1.012689047 | 0.004625497 | 0.013434884 | TMOD3      |
| novel.537       | 9.191613078 | 0           | 5.533131748  | 0.004633952 | 0.013456877 | -          |
| ENSG00000185519 | 0.615458159 | 12.41968564 | -4.347238958 | 0.004634287 | 0.013456877 | FAM131C    |
| ENSG00000110756 | 1544.488621 | 810.3481664 | 0.930234922  | 0.004634906 | 0.013456877 | HPS5       |
| ENSG00000180488 | 461.1792911 | 704.2659961 | -0.610792883 | 0.004635141 | 0.013456877 | MIGA1      |
| ENSG00000143198 | 1298.404446 | 1887.942928 | -0.540112214 | 0.004638497 | 0.013465116 | MGST3      |
| ENSG00000007516 | 47.94692925 | 14.26489974 | 1.756020024  | 0.004639866 | 0.013467584 | BAIAP3     |
| ENSG00000013016 | 484.9128219 | 1109.574357 | -1.194198005 | 0.004641357 | 0.013469851 | EHD3       |
| ENSG00000263006 | 79.96619708 | 10.80357951 | 2.882665821  | 0.004641684 | 0.013469851 | ROCK1P1    |
| ENSG00000237991 | 48.65963072 | 101.7223727 | -1.065800264 | 0.004660027 | 0.013521573 | RPL35P1    |
| ENSG00000130939 | 801.2498158 | 1297.403442 | -0.695016093 | 0.004660881 | 0.013522542 | UBE4B      |
| ENSG00000183779 | 918.6081473 | 457.706277  | 1.004829471  | 0.004662219 | 0.013524913 | ZNF703     |
| ENSG00000279191 | 5.099746614 | 21.05322109 | -2.037515118 | 0.004669027 | 0.01354315  | AC068491.4 |
| ENSG00000234451 | 10.13018619 | 0.336469917 | 4.71449547   | 0.004678652 | 0.013569553 | BX005266.3 |
| ENSG00000100888 | 1161.425302 | 1770.852539 | -0.608411606 | 0.004685942 | 0.01358918  | CHD8       |
| ENSG00000076662 | 16.86644834 | 1.386017859 | 3.577614746  | 0.004690971 | 0.013601126 | ICAM3      |
| ENSG00000186615 | 31.56792365 | 74.52321687 | -1.242504909 | 0.004691109 | 0.013601126 | KTN1-AS1   |
| ENSG00000237525 | 0.600343103 | 8.947624524 | -3.889387607 | 0.004696242 | 0.013614489 | AC012668.3 |
| novel.745       | 8.505522962 | 45.62279826 | -2.426868925 | 0.004704997 | 0.013638349 | -          |
| ENSG00000119013 | 551.051353  | 1103.096905 | -1.001474009 | 0.004711446 | 0.013655521 | NDUFB3     |
| ENSG00000222043 | 9.108373362 | 0.336469917 | 4.558701059  | 0.004714091 | 0.013661663 | AC079305.1 |
| ENSG00000211895 | 10.45010967 | 0           | 5.718245698  | 0.00471473  | 0.01366199  | IGHA1      |
| ENSG00000105221 | 2265.044663 | 3279.178838 | -0.533703457 | 0.004716144 | 0.013664562 | AKT2       |
| ENSG00000085433 | 532.1219642 | 340.5138183 | 0.643721753  | 0.004717903 | 0.013666845 | WDR47      |
| ENSG00000196922 | 342.6018345 | 205.3301788 | 0.737908049  | 0.004717984 | 0.013666845 | ZNF252P    |
| ENSG00000181788 | 280.9891038 | 491.5731981 | -0.807132761 | 0.004719456 | 0.013669585 | SIAH2      |
| ENSG00000101276 | 7.024203668 | 0           | 5.144973132  | 0.004730885 | 0.013701162 | SLC52A3    |
| ENSG00000272156 | 22.11204619 | 5.482579877 | 2.023583594  | 0.004734747 | 0.013710818 | AC008280.3 |
| ENSG00000142606 | 7.015428127 | 0           | 5.143331854  | 0.004735354 | 0.013711047 | MMEL1      |
| ENSG00000114739 | 263.3264021 | 115.9653583 | 1.185339046  | 0.004736665 | 0.013713316 | ACVR2B     |
| ENSG00000158473 | 135.2677089 | 384.3524744 | -1.507138429 | 0.004737562 | 0.013714385 | CD1D       |



|                 |             |             |              |             |             |             |
|-----------------|-------------|-------------|--------------|-------------|-------------|-------------|
| ENSG00000246526 | 8.58360554  | 0           | 5.434228939  | 0.004740458 | 0.01372017  | LINC002481  |
| ENSG00000128596 | 62.47038538 | 161.9618921 | -1.374247775 | 0.004740617 | 0.01372017  | CCDC136     |
| ENSG00000147854 | 831.0360287 | 1438.765628 | -0.791941938 | 0.004747361 | 0.013738157 | UHRF2       |
| ENSG00000219881 | 6.62265013  | 0           | 5.061956073  | 0.004748235 | 0.013739158 | GAPDHP42    |
| ENSG00000204179 | 43.45554582 | 7.613641613 | 2.500153822  | 0.004749929 | 0.013741511 | PTPN20      |
| ENSG00000223403 | 132.0607941 | 238.8407024 | -0.854644247 | 0.004750106 | 0.013741511 | MEG9        |
| ENSG00000261351 | 43.67898144 | 16.70406156 | 1.383085999  | 0.00475769  | 0.013761504 | AC116913.1  |
| ENSG00000120949 | 15.88851357 | 2.089639274 | 2.902999643  | 0.004758077 | 0.013761504 | TNFRSF8     |
| novel.388       | 12.66257951 | 1.365948763 | 3.169176944  | 0.004758874 | 0.013762277 | -           |
| ENSG00000254231 | 9.98308131  | 0.723690511 | 3.79549967   | 0.004761443 | 0.013768176 | AC103760.1  |
| ENSG00000198156 | 17.99009215 | 2.466247382 | 2.855372817  | 0.004765893 | 0.013779111 | NPIP6       |
| ENSG00000178586 | 8.547178455 | 0           | 5.428468275  | 0.004766286 | 0.013779111 | OR6B3       |
| ENSG00000214552 | 1.818651661 | 11.93327544 | -2.712890927 | 0.004767466 | 0.013780989 | COPS8P2     |
| ENSG00000116254 | 31.202655   | 3.932541625 | 2.986335009  | 0.004769404 | 0.013785059 | CHD5        |
| ENSG00000101204 | 16.63742866 | 0           | 6.389585806  | 0.004779329 | 0.013812208 | CHRNA4      |
| ENSG00000135597 | 469.7898643 | 673.0359741 | -0.518912385 | 0.004789254 | 0.01383935  | REPS1       |
| ENSG00000163636 | 1183.676647 | 1919.627433 | -0.697631412 | 0.004791109 | 0.013843171 | PSMD6       |
| ENSG00000174606 | 839.0704776 | 512.0645657 | 0.712717865  | 0.004793851 | 0.013849556 | ANGEL2      |
| ENSG00000185640 | 0           | 14.02034617 | -6.388416321 | 0.004797126 | 0.013857475 | KRT79       |
| novel.56        | 9.896151919 | 33.01717811 | -1.732017452 | 0.004799446 | 0.013862637 | -           |
| ENSG00000188177 | 495.7140571 | 234.4445038 | 1.081350794  | 0.004808302 | 0.01388667  | ZC3H6       |
| ENSG00000278925 | 9.469382864 | 0           | 5.578686812  | 0.004810073 | 0.013888698 | AC005753.1  |
| ENSG00000283355 | 9.469382864 | 0           | 5.578686812  | 0.004810073 | 0.013888698 | AC074194.2  |
| ENSG00000182606 | 1112.788491 | 736.9830028 | 0.594343332  | 0.004812949 | 0.013895457 | TRAK1       |
| ENSG00000279672 | 31.95637123 | 123.7724176 | -1.951194513 | 0.004814857 | 0.013899423 | AP006621.5  |
| ENSG00000005007 | 1839.25018  | 2736.45856  | -0.573294621 | 0.004818757 | 0.013909136 | UPF1        |
| ENSG00000230565 | 33.6190712  | 10.08921721 | 1.739930945  | 0.004822799 | 0.013919256 | ZNF32-AS2   |
| ENSG00000227615 | 158.0649482 | 266.570131  | -0.754348953 | 0.004825071 | 0.013924267 | AP001324.1  |
| ENSG00000204634 | 244.0081774 | 411.9440566 | -0.755394609 | 0.004830888 | 0.013939504 | TBC1D8      |
| ENSG00000268521 | 41.92559113 | 10.69963801 | 1.968793532  | 0.004831978 | 0.013941103 | VN1R83P     |
| ENSG00000197894 | 2096.642212 | 3498.856624 | -0.738874847 | 0.004836844 | 0.013953593 | ADH5        |
| ENSG00000269293 | 179.3257498 | 98.26049167 | 0.870162986  | 0.004844065 | 0.013972873 | ZSCAN16-AS1 |
| ENSG00000164114 | 276.8231292 | 497.927401  | -0.847334658 | 0.004846208 | 0.013977501 | MAP9        |
| ENSG00000241255 | 0           | 6.215726999 | -5.214135285 | 0.004846908 | 0.013977969 | AL136126.1  |
| ENSG00000116852 | 360.2725441 | 184.0469038 | 0.970473076  | 0.004848234 | 0.013980242 | KIF21B      |
| ENSG00000239557 | 2.712235611 | 14.08427787 | -2.371194531 | 0.004854023 | 0.013995379 | AC092045.1  |
| ENSG00000213793 | 144.0877854 | 80.05179552 | 0.845452483  | 0.004857961 | 0.014005179 | ZNF888      |
| ENSG00000123191 | 114.9786176 | 252.5428839 | -1.133875119 | 0.004859784 | 0.014008881 | ATP7B       |
| novel.609       | 17.81143224 | 2.862924587 | 2.635011414  | 0.004866794 | 0.014027533 | -           |
| ENSG00000255136 | 6.344524339 | 0           | 4.999570623  | 0.004868524 | 0.014030962 | AP001972.3  |
| ENSG00000196616 | 3104.732028 | 50.30397979 | 5.947127924  | 0.004871044 | 0.014036669 | ADH1B       |
| novel.419       | 27.32784085 | 1.345879667 | 4.307566067  | 0.004878644 | 0.014057008 | -           |
| ENSG00000100105 | 882.5389163 | 552.1388918 | 0.676453217  | 0.004901746 | 0.014122007 | PATZ1       |
| ENSG00000112309 | 19.97375578 | 4.717595299 | 2.089254825  | 0.004903638 | 0.014125893 | B3GAT2      |
| ENSG00000095209 | 158.4444343 | 341.1867924 | -1.106670496 | 0.004905638 | 0.014130086 | TMEM38B     |
| ENSG00000137218 | 223.9231034 | 116.3161651 | 0.947139157  | 0.004918889 | 0.014166685 | FRS3        |
| ENSG00000185009 | 625.4903223 | 1046.366104 | -0.742599993 | 0.004923338 | 0.014177927 | AP3M1       |
| ENSG00000136718 | 814.83373   | 1296.884685 | -0.670708828 | 0.004928545 | 0.014191349 | IMP4        |
| ENSG00000126351 | 1806.057055 | 1027.832249 | 0.813542934  | 0.004930593 | 0.01419567  | THRA        |
| ENSG00000269981 | 15.65419456 | 1.90542139  | 3.083677166  | 0.004932046 | 0.014198281 | AL627309.7  |
| ENSG00000154114 | 546.0001311 | 368.5851922 | 0.567159962  | 0.004933478 | 0.01420083  | TBCEL       |

|                 |             |             |              |             |             |             |
|-----------------|-------------|-------------|--------------|-------------|-------------|-------------|
| ENSG00000210176 | 64.45548829 | 153.0745218 | -1.247786879 | 0.004935326 | 0.014204576 | MT-TH       |
| ENSG00000124155 | 1545.596501 | 2595.614276 | -0.74789739  | 0.004936293 | 0.014205784 | PIGT        |
| ENSG00000273437 | 15.79280864 | 1.345879667 | 3.503146929  | 0.004942632 | 0.014222214 | AC108673.3  |
| ENSG00000251661 | 67.96302435 | 22.95864248 | 1.570625455  | 0.004943097 | 0.014222214 | AC136475.1  |
| novel.730       | 7.185169957 | 0           | 5.180096063  | 0.004946533 | 0.014230524 | -           |
| ENSG00000231125 | 21.96089563 | 5.737617535 | 1.937320387  | 0.004948642 | 0.014235017 | AF129075.1  |
| ENSG00000165125 | 7.180155362 | 0           | 5.179177744  | 0.004949574 | 0.01423612  | TRPV6       |
| ENSG00000159111 | 495.022723  | 742.0095161 | -0.583955309 | 0.00495892  | 0.014261423 | MRPL10      |
| ENSG00000115963 | 2626.838851 | 1455.994706 | 0.851373232  | 0.004959571 | 0.014261717 | RND3        |
| ENSG00000254164 | 6.709579521 | 0           | 5.078974024  | 0.004964637 | 0.0142738   | AC008663.3  |
| ENSG00000135312 | 1.21705491  | 15.94981786 | -3.719203853 | 0.004964872 | 0.0142738   | HTR1B       |
| ENSG00000214063 | 1486.473465 | 3240.43206  | -1.124385233 | 0.004966223 | 0.014276105 | TSPAN4      |
| ENSG00000163554 | 6.333170229 | 0           | 4.997251745  | 0.004985689 | 0.014328892 | SPTA1       |
| ENSG00000261522 | 6.333170229 | 0           | 4.997251745  | 0.004985689 | 0.014328892 | AL845331.3  |
| ENSG00000132694 | 1138.829914 | 809.6350287 | 0.492029028  | 0.004990505 | 0.014341147 | ARHGEF11    |
| ENSG00000235016 | 43.7794875  | 13.51296779 | 1.693354464  | 0.004991259 | 0.014341728 | SEMA3F-AS1  |
| ENSG00000070010 | 697.3730665 | 1168.4505   | -0.744482529 | 0.005000645 | 0.014367109 | UFD1        |
| ENSG00000171517 | 2.758834428 | 39.84037218 | -3.85418368  | 0.005003878 | 0.014374806 | LPAR3       |
| ENSG00000100626 | 158.9063052 | 31.28335434 | 2.340319017  | 0.005006734 | 0.014381145 | GALNT16     |
| ENSG00000255559 | 16.111265   | 2.079026788 | 2.927329359  | 0.005007191 | 0.014381145 | ZNF252P-AS1 |
| ENSG00000108651 | 849.5219248 | 1295.375204 | -0.608855829 | 0.005010172 | 0.014388116 | UTP6        |
| ENSG00000198855 | 148.3409029 | 248.4467543 | -0.743585234 | 0.005013077 | 0.014394868 | FICD        |
| ENSG00000198382 | 605.5215533 | 407.5811209 | 0.570835175  | 0.005021782 | 0.014418269 | UVRAG       |
| ENSG00000106070 | 683.7754614 | 1337.171697 | -0.967308035 | 0.005026345 | 0.014429776 | GRB10       |
| ENSG00000146828 | 1229.758625 | 748.6651406 | 0.715942724  | 0.005027561 | 0.014431671 | SLC12A9     |
| ENSG00000125966 | 20.63706641 | 48.8217604  | -1.243322511 | 0.005050457 | 0.014495792 | MMP24       |
| ENSG00000105976 | 2003.401097 | 1086.766647 | 0.882472494  | 0.005053744 | 0.014501381 | MET         |
| ENSG00000007080 | 1225.170751 | 1791.249859 | -0.54809898  | 0.005053953 | 0.014501381 | CCDC124     |
| ENSG00000237624 | 10.27632216 | 29.58525519 | -1.523092246 | 0.005054078 | 0.014501381 | OXCT2P1     |
| ENSG00000162543 | 8.864238629 | 0           | 5.480958149  | 0.005058234 | 0.014511701 | UBXN10      |
| ENSG00000101017 | 349.9280976 | 182.7457859 | 0.938920894  | 0.005060774 | 0.014517385 | CD40        |
| ENSG00000204287 | 392.6460953 | 0           | 10.95062144  | 0.005065442 | 0.014529174 | HLA-DRA     |
| ENSG00000109332 | 4007.89787  | 5541.988543 | -0.467551361 | 0.005067373 | 0.014533107 | UBE2D3      |
| ENSG00000229618 | 8.978677372 | 0           | 5.501150279  | 0.005074666 | 0.014552416 | AC011287.1  |
| ENSG00000106603 | 617.2297761 | 922.5331758 | -0.579464484 | 0.005078861 | 0.014562839 | COA1        |
| ENSG00000100650 | 7210.711602 | 4292.290939 | 0.74845525   | 0.005083119 | 0.014573441 | SRSF5       |
| ENSG00000006118 | 1620.740977 | 5700.949885 | -1.814524869 | 0.005090059 | 0.014591727 | TMEM132A    |
| ENSG00000161681 | 12.63632381 | 480.6369311 | -5.249940383 | 0.005092428 | 0.014596908 | SHANK1      |
| ENSG00000226674 | 25.37265548 | 2.395427609 | 3.381057622  | 0.005097998 | 0.014611261 | TEX41       |
| ENSG00000286381 | 46.37967731 | 3.741307276 | 3.614626661  | 0.005107038 | 0.014635556 | AL078622.1  |
| ENSG00000230561 | 21.76343098 | 6.410557368 | 1.758526826  | 0.005123581 | 0.014681346 | CCDC192     |
| ENSG00000266235 | 1.802282956 | 14.02304311 | -2.958902674 | 0.005124567 | 0.014682551 | MIR3176     |
| ENSG00000166924 | 125.6742582 | 278.2776721 | -1.145569091 | 0.005130677 | 0.014698435 | NYAP1       |
| ENSG00000209082 | 112.1864329 | 40.58567285 | 1.472004258  | 0.005139318 | 0.014721567 | MT-TL1      |
| ENSG00000127774 | 20.65092782 | 48.90319266 | -1.244611928 | 0.00514026  | 0.014722643 | EMC6        |
| ENSG00000167785 | 376.7664591 | 233.9483458 | 0.687697086  | 0.00514713  | 0.014740695 | ZNF558      |
| ENSG00000154079 | 134.1991554 | 216.5642808 | -0.690162494 | 0.005152087 | 0.014753265 | SDHAF4      |
| ENSG00000262619 | 6.701986357 | 0           | 5.077497097  | 0.005158002 | 0.014768576 | LINC00621   |
| ENSG00000116761 | 46.34203966 | 104.8782897 | -1.178209426 | 0.005159127 | 0.014770168 | CTH         |
| ENSG00000119698 | 0           | 12.93908917 | -6.273532096 | 0.00516171  | 0.014775936 | PPP4R4      |
| ENSG00000120334 | 91.52081695 | 219.8594101 | -1.265809125 | 0.005163357 | 0.014779022 | CENPL       |

|                 |             |             |              |             |             |            |
|-----------------|-------------|-------------|--------------|-------------|-------------|------------|
| ENSG00000144048 | 315.7507657 | 514.7016875 | -0.705091628 | 0.00517442  | 0.014809056 | DUSP11     |
| ENSG00000225472 | 8.704312526 | 0.336469917 | 4.495084439  | 0.0051821   | 0.014829403 | AL136366.1 |
| ENSG00000234663 | 9.805746316 | 0.336469917 | 4.664068844  | 0.005184858 | 0.01483566  | LINC01934  |
| ENSG00000164889 | 1642.489925 | 2510.712295 | -0.612201953 | 0.005190955 | 0.014851472 | SLC4A2     |
| ENSG00000076685 | 348.4616361 | 629.3035705 | -0.853121133 | 0.005194072 | 0.014858753 | NT5C2      |
| novel.672       | 35.46627205 | 1.936102971 | 4.227965715  | 0.005200276 | 0.014874862 | -          |
| ENSG00000248309 | 30.05039073 | 5.401147618 | 2.476391878  | 0.005212443 | 0.014908023 | MEF2C-AS1  |
| ENSG00000213881 | 9.323531631 | 30.40240311 | -1.705434845 | 0.005230731 | 0.014958681 | NPM1P6     |
| ENSG00000101413 | 462.104501  | 681.5853332 | -0.560654759 | 0.00523682  | 0.014974447 | RPRD1B     |
| ENSG00000267500 | 0.586481695 | 10.03731066 | -4.066216264 | 0.005239338 | 0.014979999 | ZNF887P    |
| ENSG00000223459 | 0.894837599 | 18.38183482 | -4.354391198 | 0.005251846 | 0.015014107 | TCAF1P1    |
| ENSG00000101210 | 3.692748952 | 34.53268197 | -3.228164859 | 0.005254744 | 0.01502074  | EEF1A2     |
| ENSG00000103995 | 162.3720873 | 275.2692204 | -0.761661029 | 0.005259037 | 0.015031356 | CEP152     |
| ENSG00000228630 | 0.586481695 | 23.99441428 | -5.335260661 | 0.005270362 | 0.01506207  | HOTAIR     |
| ENSG00000204271 | 351.9760262 | 197.6873967 | 0.831548144  | 0.005274206 | 0.015071398 | SPIN3      |
| ENSG00000181588 | 613.9781005 | 1029.226079 | -0.74501804  | 0.005288213 | 0.01510976  | MEX3D      |
| ENSG00000119616 | 573.3647116 | 986.5260998 | -0.783292792 | 0.005291176 | 0.015116564 | FCF1       |
| ENSG00000188171 | 179.313142  | 83.84757789 | 1.093565302  | 0.005295476 | 0.015127186 | ZNF626     |
| ENSG00000112715 | 1569.401981 | 7923.876389 | -2.335950421 | 0.005296487 | 0.015128412 | VEGFA      |
| ENSG00000270184 | 4.836735879 | 19.70734142 | -2.021530719 | 0.005301766 | 0.015141825 | AC018695.4 |
| ENSG00000238228 | 12.34788409 | 1.41669944  | 3.113086305  | 0.005302402 | 0.015141978 | OR7E7P     |
| ENSG00000175886 | 6.944867441 | 23.57021915 | -1.758672021 | 0.00530651  | 0.015152043 | RPL7AP66   |
| ENSG00000032444 | 1533.637253 | 2617.024289 | -0.770828032 | 0.005320562 | 0.015190498 | PNPLA6     |
| ENSG00000125630 | 303.5109812 | 507.0473123 | -0.741027265 | 0.005328411 | 0.015211234 | POLR1B     |
| ENSG00000145860 | 1455.95578  | 2296.751963 | -0.657591746 | 0.00533069  | 0.015216069 | RNF145     |
| ENSG00000054965 | 2773.666488 | 1556.378434 | 0.833801051  | 0.005335484 | 0.015228078 | FAM168A    |
| ENSG00000243199 | 281.9072622 | 559.3618586 | -0.988786666 | 0.005337664 | 0.015232628 | AC115223.1 |
| ENSG00000113448 | 332.8924056 | 982.3880928 | -1.561477923 | 0.005340717 | 0.015239668 | PDE4D      |
| ENSG00000126216 | 294.9774938 | 480.0455425 | -0.702452595 | 0.005353876 | 0.015275539 | TUBGCP3    |
| ENSG00000205639 | 6.915890978 | 23.90797334 | -1.787265357 | 0.005359137 | 0.015288869 | MFSD2B     |
| ENSG00000169297 | 0           | 6.23695197  | -5.218500055 | 0.005360475 | 0.015291009 | NR0B1      |
| ENSG00000167862 | 322.5008618 | 531.22222   | -0.720533405 | 0.005361798 | 0.015293102 | MRPL58     |
| ENSG00000161202 | 2694.684221 | 1953.970592 | 0.463716992  | 0.005365142 | 0.015300962 | DVL3       |
| ENSG00000287884 | 26.77248726 | 2.495773089 | 3.419312394  | 0.005369245 | 0.015310983 | AC005594.1 |
| ENSG00000023191 | 133.6802998 | 284.1448356 | -1.087613819 | 0.005388756 | 0.015364934 | RNH1       |
| ENSG00000160214 | 482.4761213 | 848.3907019 | -0.814576758 | 0.005390127 | 0.015366701 | RRP1       |
| ENSG00000140479 | 72.89821375 | 10.52603261 | 2.793599275  | 0.005390559 | 0.015366701 | PCSK6      |
| ENSG00000183955 | 655.9174936 | 1054.091534 | -0.684769106 | 0.005404272 | 0.015404101 | KMT5A      |
| ENSG00000152784 | 97.12569958 | 338.2381161 | -1.800563322 | 0.005405887 | 0.015407017 | PRDM8      |
| ENSG00000140750 | 967.1540697 | 1406.866831 | -0.540855034 | 0.005418508 | 0.015441291 | ARHGAP17   |
| ENSG00000112877 | 48.08805062 | 103.8506091 | -1.109823561 | 0.005423636 | 0.015454211 | CEP72      |
| ENSG00000285669 | 29.24943495 | 7.866239125 | 1.89298126   | 0.005432857 | 0.015478786 | AC026979.4 |
| ENSG00000235652 | 100.9358656 | 38.52684355 | 1.394274952  | 0.00544584  | 0.015514076 | AL356599.1 |
| ENSG00000112499 | 22.19159588 | 0.356539013 | 5.843404875  | 0.005448736 | 0.015520623 | SLC22A2    |
| ENSG00000075426 | 2049.827551 | 5240.206126 | -1.354058709 | 0.005451491 | 0.015526769 | FOSL2      |
| ENSG00000157259 | 1086.937326 | 780.6723482 | 0.477518752  | 0.005453419 | 0.015530557 | GATAD1     |
| ENSG00000239569 | 92.36515259 | 46.96097231 | 0.978204109  | 0.005461133 | 0.01555082  | KMT2E-AS1  |
| ENSG00000131400 | 23.10488255 | 5.361009426 | 2.106898133  | 0.005463039 | 0.015554545 | NAPSA      |
| ENSG00000162961 | 490.6058041 | 704.6877174 | -0.522396879 | 0.005463915 | 0.015555333 | DPY30      |
| ENSG00000226744 | 10.85778926 | 0.672939833 | 3.947015162  | 0.005469919 | 0.015570719 | AC005326.1 |
| ENSG00000214575 | 18.97590482 | 1.426156051 | 3.727690443  | 0.005474109 | 0.01558094  | CPEB1      |

|                 |             |             |              |             |             |            |
|-----------------|-------------|-------------|--------------|-------------|-------------|------------|
| ENSG00000198270 | 158.862044  | 87.90857804 | 0.851873307  | 0.005477804 | 0.015558975 | TMEM116    |
| ENSG00000284966 | 22.18393179 | 4.881744087 | 2.165796236  | 0.005480309 | 0.015595172 | AL138689.2 |
| ENSG00000280071 | 128.7903687 | 253.2630725 | -0.976485056 | 0.005483315 | 0.015602014 | GATD3B     |
| ENSG00000205659 | 311.865468  | 189.1705986 | 0.720168563  | 0.005492546 | 0.015625699 | LIN52      |
| ENSG00000213977 | 196.6808949 | 106.1058098 | 0.88930542   | 0.005492841 | 0.015625699 | TAX1BP3    |
| ENSG00000179542 | 26.67219466 | 112.2086866 | -2.073369031 | 0.005494689 | 0.015629243 | SLITRK4    |
| ENSG00000260459 | 7.030543183 | 0           | 5.14623546   | 0.005497269 | 0.01563145  | FTLP14     |
| ENSG00000255422 | 7.030543183 | 0           | 5.14623546   | 0.005497269 | 0.01563145  | AP002954.1 |
| ENSG00000159387 | 7.030543183 | 0           | 5.14623546   | 0.005497269 | 0.01563145  | IRX6       |
| ENSG00000188000 | 13.90832615 | 0.356539013 | 5.171215454  | 0.005500266 | 0.01563826  | OR7D2      |
| ENSG00000103671 | 369.0617063 | 543.4104862 | -0.558465736 | 0.005510354 | 0.015665227 | TRIP4      |
| ENSG00000086189 | 606.1933551 | 930.5882688 | -0.618618743 | 0.005515753 | 0.01567886  | DIMT1      |
| ENSG00000163257 | 549.5793824 | 920.2935831 | -0.743391454 | 0.005527563 | 0.015710711 | DCAF16     |
| ENSG00000170903 | 278.2656291 | 438.0344843 | -0.654666741 | 0.005530215 | 0.015716529 | MSANTD4    |
| novel.758       | 12.6249697  | 0           | 5.991214701  | 0.005531541 | 0.015717872 | -          |
| ENSG00000271856 | 6.982619446 | 0           | 5.137168614  | 0.005531897 | 0.015717872 | LINC01215  |
| ENSG00000287766 | 15.30808665 | 1.793307549 | 3.093842984  | 0.005533983 | 0.01572208  | AC006130.3 |
| ENSG00000210100 | 2.695866906 | 17.43964883 | -2.6920034   | 0.005536001 | 0.015726091 | MT-TI      |
| ENSG00000113272 | 222.2995082 | 365.9479551 | -0.719693588 | 0.005548474 | 0.015759801 | THG1L      |
| ENSG00000155545 | 535.1909776 | 347.0044424 | 0.624736049  | 0.005550448 | 0.015763685 | MIER3      |
| ENSG00000162631 | 814.5773072 | 215.7029194 | 1.917765131  | 0.005553035 | 0.015769308 | NTNG1      |
| ENSG00000287074 | 13.58388628 | 2.496928964 | 2.439348274  | 0.005554862 | 0.015772772 | AC137561.1 |
| ENSG00000119185 | 2750.238153 | 1666.451324 | 0.722838944  | 0.005568125 | 0.015808703 | ITGB1BP1   |
| ENSG00000164978 | 295.6858492 | 531.8904898 | -0.847184878 | 0.00557526  | 0.015827233 | NUDT2      |
| ENSG00000134186 | 1648.43063  | 1120.611213 | 0.55671044   | 0.005581869 | 0.015844263 | PRPF38B    |
| ENSG00000007001 | 6.404984563 | 0           | 5.011892112  | 0.005587347 | 0.015854931 | UPP2       |
| ENSG00000123427 | 117.6086816 | 194.9688901 | -0.728518559 | 0.005587791 | 0.015854931 | EEF1AKMT3  |
| ENSG00000100263 | 359.3657398 | 561.360386  | -0.643984459 | 0.005588029 | 0.015854931 | RHBDD3     |
| ENSG00000234318 | 6.403730914 | 0           | 5.011638109  | 0.005588068 | 0.015854931 | AC099794.1 |
| ENSG00000272505 | 8.030901441 | 0           | 5.340952817  | 0.00559051  | 0.015858962 | AC104964.4 |
| ENSG00000279716 | 54.70686853 | 24.50063679 | 1.154384551  | 0.00559071  | 0.015858962 | AC006128.1 |
| ENSG00000084112 | 2519.736791 | 5205.757442 | -1.046762008 | 0.005595195 | 0.015869951 | SSH1       |
| ENSG00000287726 | 6.891929109 | 0           | 5.119913797  | 0.005597437 | 0.015872846 | AC005740.5 |
| ENSG00000223511 | 6.891929109 | 0           | 5.119913797  | 0.005597437 | 0.015872846 | AL683807.1 |
| ENSG00000110719 | 1684.022694 | 3383.302668 | -1.006416697 | 0.005599308 | 0.015876417 | TCIRG1     |
| ENSG00000142765 | 77.64633932 | 20.37912538 | 1.932106065  | 0.005605265 | 0.015891575 | SYTL1      |
| ENSG00000287919 | 6.067652196 | 0           | 4.934553442  | 0.005623966 | 0.015941317 | AC092802.4 |
| ENSG00000104626 | 15.68539359 | 79.69739269 | -2.341428297 | 0.005624232 | 0.015941317 | ERI1       |
| ENSG00000272145 | 43.14794537 | 18.39458348 | 1.233478644  | 0.005624651 | 0.015941317 | NFYC-AS1   |
| ENSG00000152348 | 105.4783918 | 171.0425171 | -0.697912878 | 0.005632719 | 0.015962442 | ATG10      |
| ENSG00000259917 | 36.99622709 | 74.09915013 | -1.00326796  | 0.005636524 | 0.015971483 | HNRNPLP2   |
| ENSG00000121940 | 332.0986161 | 504.9049489 | -0.604462414 | 0.005642788 | 0.01598749  | CLCC1      |
| ENSG00000142920 | 337.5956842 | 190.3372222 | 0.827683117  | 0.005643518 | 0.015987813 | AZIN2      |
| ENSG00000144152 | 72.21202489 | 22.9976248  | 1.655298079  | 0.005645679 | 0.015992192 | FBLN7      |
| ENSG00000176422 | 135.2214668 | 223.0162606 | -0.722014945 | 0.005652023 | 0.016008417 | SPRYD4     |
| ENSG00000214765 | 347.915501  | 196.7522743 | 0.821761788  | 0.005658504 | 0.016025025 | SEPT7P2    |
| ENSG00000122861 | 1691.807825 | 8476.154434 | -2.324843305 | 0.005662706 | 0.01603518  | PLAU       |
| ENSG00000257511 | 42.84181203 | 12.84002796 | 1.737076813  | 0.00566942  | 0.01605244  | AC084824.1 |
| ENSG00000167971 | 40.75863908 | 7.031462255 | 2.544740264  | 0.005676572 | 0.01607094  | CASKIN1    |
| ENSG00000156831 | 235.0580496 | 367.4061582 | -0.644504634 | 0.005677673 | 0.01607116  | NSMCE2     |
| ENSG00000171368 | 60.60915275 | 14.75362169 | 2.045687673  | 0.005677887 | 0.01607116  | TPPP       |

|                 |             |             |              |             |             |            |
|-----------------|-------------|-------------|--------------|-------------|-------------|------------|
| ENSG00000215068 | 140.4211496 | 61.24645473 | 1.194645666  | 0.005684161 | 0.016087167 | AC025171.2 |
| ENSG00000274184 | 12.0244844  | 0.693008929 | 4.083736625  | 0.005693401 | 0.016111562 | AC011815.2 |
| ENSG00000259775 | 38.97939252 | 8.163726725 | 2.252275065  | 0.005696831 | 0.016119513 | AL138976.2 |
| ENSG00000124193 | 3633.893603 | 2280.636202 | 0.672079145  | 0.005710648 | 0.01615685  | SRSF6      |
| ENSG00000165678 | 2439.488626 | 3684.422804 | -0.594917738 | 0.005717885 | 0.016175563 | GHITM      |
| ENSG00000233834 | 8.416086274 | 0.336469917 | 4.446303124  | 0.005719319 | 0.016177859 | AC005083.1 |
| ENSG00000177192 | 357.1606928 | 640.4127551 | -0.842744829 | 0.005724899 | 0.016191879 | PUS1       |
| ENSG00000183250 | 77.43673763 | 157.477386  | -1.023498952 | 0.005726128 | 0.016193553 | LINC01547  |
| ENSG00000167578 | 63.76019571 | 14.70402689 | 2.122851021  | 0.005726737 | 0.016193553 | RAB4B      |
| novel.533       | 133.4998446 | 252.8477391 | -0.92144111  | 0.005729557 | 0.016199763 | -          |
| ENSG00000167702 | 672.4006556 | 299.3323058 | 1.16832242   | 0.00573077  | 0.01620143  | KIFC2      |
| ENSG00000088305 | 49.20173616 | 95.36983923 | -0.955656931 | 0.005735812 | 0.01621392  | DNMT3B     |
| ENSG00000029725 | 1334.382138 | 787.6522416 | 0.760374916  | 0.00574227  | 0.016228832 | RABEP1     |
| ENSG00000256915 | 1.495180701 | 16.41461791 | -3.444630615 | 0.005742337 | 0.016228832 | AC090023.2 |
| ENSG00000224078 | 1812.55101  | 1096.15571  | 0.725651592  | 0.005767149 | 0.016297184 | SNHG14     |
| ENSG00000152894 | 1.802282956 | 14.56611175 | -3.01515314  | 0.005768551 | 0.016298643 | PTPRK      |
| ENSG00000257605 | 19.27512918 | 45.47358149 | -1.236612691 | 0.00576892  | 0.016298643 | AC073611.2 |
| ENSG00000115944 | 972.8617912 | 1899.64296  | -0.965460502 | 0.005775198 | 0.016314603 | COX7A2L    |
| ENSG00000168038 | 33.62318815 | 84.91624899 | -1.334446998 | 0.005791035 | 0.016357566 | ULK4       |
| ENSG00000184635 | 41.77278748 | 99.12761958 | -1.248902779 | 0.005793152 | 0.016361767 | ZNF93      |
| ENSG00000077264 | 49.14735855 | 4.534661685 | 3.429257169  | 0.005805354 | 0.016394445 | PAK3       |
| novel.441       | 3.638556971 | 34.1321176  | -3.232828022 | 0.005806019 | 0.016394542 | -          |
| ENSG00000094916 | 1938.783252 | 2881.158389 | -0.571610814 | 0.005815484 | 0.016419485 | CBX5       |
| ENSG00000224950 | 16.99474849 | 3.9336975   | 2.107832558  | 0.005822272 | 0.016436864 | AL390066.1 |
| ENSG00000275630 | 0.909952655 | 10.28404758 | -3.502625723 | 0.005823091 | 0.016437388 | AC004816.2 |
| ENSG00000168453 | 722.0840251 | 213.7116179 | 1.757273778  | 0.005823966 | 0.016438072 | HR         |
| ENSG00000078124 | 728.6574789 | 423.798468  | 0.781519847  | 0.005829836 | 0.016452854 | ACER3      |
| ENSG00000171552 | 1240.952971 | 2431.173276 | -0.97033176  | 0.005831384 | 0.016455434 | BCL2L1     |
| ENSG00000188153 | 662.2437705 | 1076.915609 | -0.701187177 | 0.005833349 | 0.016459192 | COL4A5     |
| ENSG00000108590 | 54.4050656  | 104.8001495 | -0.946921166 | 0.005838702 | 0.016470793 | MED31      |
| ENSG00000079308 | 4598.922727 | 2267.606027 | 1.020229862  | 0.005838728 | 0.016470793 | TNS1       |
| ENSG00000081479 | 6.315547875 | 0           | 4.99359986   | 0.005852365 | 0.016507468 | LRP2       |
| novel.339       | 14.75845932 | 0           | 6.216697393  | 0.005864322 | 0.016539399 | -          |
| ENSG00000141759 | 1360.809127 | 2052.314936 | -0.592824023 | 0.005874734 | 0.016566968 | TXNL4A     |
| ENSG00000167792 | 2160.113688 | 3068.279035 | -0.506308442 | 0.005878307 | 0.016575244 | NDUFV1     |
| ENSG00000287629 | 11.40394038 | 1.049547942 | 3.418927603  | 0.005882711 | 0.016585862 | AC006059.5 |
| ENSG00000143797 | 1974.659577 | 883.7406124 | 1.159704953  | 0.005884439 | 0.016588934 | MBOAT2     |
| ENSG00000286833 | 10.80735822 | 0.743759607 | 3.89761244   | 0.005889156 | 0.016600428 | AC097532.3 |
| ENSG00000066777 | 667.7129587 | 1050.119715 | -0.653063677 | 0.005897656 | 0.016622586 | ARFGEF1    |
| ENSG00000048544 | 605.5238468 | 1013.732319 | -0.743788804 | 0.005899345 | 0.016625543 | MRPS10     |
| ENSG00000188921 | 397.3249129 | 132.1017998 | 1.587360341  | 0.005903073 | 0.016634246 | HACD4      |
| ENSG00000083535 | 261.9936822 | 436.0494757 | -0.73570161  | 0.00590374  | 0.016634319 | PIBF1      |
| ENSG00000198807 | 29.44754033 | 126.414933  | -2.104020513 | 0.005912969 | 0.016658517 | PAX9       |
| ENSG00000103047 | 201.0091607 | 400.6172804 | -0.995723166 | 0.005922542 | 0.016683678 | TANGO6     |
| ENSG00000115524 | 8801.414045 | 5380.18869  | 0.710135183  | 0.005927152 | 0.016694853 | SF3B1      |
| ENSG00000196715 | 857.2244113 | 1261.439668 | -0.557590418 | 0.005928278 | 0.016696216 | VKORC1L1   |
| ENSG00000125871 | 362.7073659 | 605.5368307 | -0.739923525 | 0.005946493 | 0.016745699 | MGME1      |
| ENSG00000278965 | 6.393630453 | 0           | 5.009595616  | 0.005955098 | 0.016768114 | AC122713.2 |
| ENSG00000196290 | 335.5276698 | 503.6186345 | -0.585943737 | 0.00595697  | 0.016771568 | NIF3L1     |
| ENSG00000274008 | 13.37499625 | 1.396630344 | 3.236833379  | 0.00596502  | 0.016792414 | RF00017    |
| ENSG00000109063 | 99.12932354 | 35.70320525 | 1.470767903  | 0.005966225 | 0.016793985 | MYH3       |

|                 |             |             |              |             |             |            |
|-----------------|-------------|-------------|--------------|-------------|-------------|------------|
| ENSG00000170017 | 3518.398354 | 7519.546844 | -1.095750552 | 0.00596972  | 0.016802004 | ALCAM      |
| ENSG00000188227 | 214.3327288 | 92.10232188 | 1.216137618  | 0.005985056 | 0.016843343 | ZNF793     |
| ENSG00000112144 | 606.8794883 | 321.6457485 | 0.915082264  | 0.005988617 | 0.016851539 | ICK        |
| ENSG00000157766 | 30.68311524 | 8.744621814 | 1.797409579  | 0.005993335 | 0.016862988 | ACAN       |
| ENSG00000167535 | 345.1799446 | 648.666913  | -0.909564852 | 0.0059974   | 0.0168726   | CACNB3     |
| ENSG0000010295  | 1296.685133 | 805.8510966 | 0.686613639  | 0.006003394 | 0.016887634 | IFFO1      |
| ENSG00000112759 | 1160.931013 | 470.7065194 | 1.302125021  | 0.006007016 | 0.016895993 | SLC29A1    |
| ENSG00000111537 | 6.082767252 | 0           | 4.93777583   | 0.006008473 | 0.016898261 | IFNG       |
| ENSG00000204316 | 114.0056262 | 53.76833528 | 1.084681964  | 0.006009826 | 0.016898829 | MRPL38     |
| ENSG00000111110 | 104.9943811 | 29.2076196  | 1.844237486  | 0.006009976 | 0.016898829 | PPM1H      |
| ENSG00000272578 | 11.43166319 | 31.72333339 | -1.468186856 | 0.006011754 | 0.016901999 | AP000347.1 |
| ENSG00000182896 | 6.302940116 | 0           | 4.990992324  | 0.006012628 | 0.016902627 | TMEM95     |
| ENSG00000261286 | 2.446717578 | 13.91195675 | -2.51600212  | 0.006017762 | 0.016915231 | ATP2C2-AS1 |
| ENSG00000060069 | 293.4578096 | 434.7126206 | -0.566382976 | 0.006019077 | 0.016917097 | CTDP1      |
| ENSG00000115904 | 1103.032409 | 696.1358578 | 0.664214827  | 0.006023441 | 0.016927531 | SOS1       |
| ENSG00000174788 | 8.830247571 | 0.336469917 | 4.513557513  | 0.006028861 | 0.016940929 | PCP2       |
| ENSG00000204923 | 102.6338816 | 53.91840396 | 0.926866278  | 0.006034575 | 0.016955153 | FBXO48     |
| ENSG00000232706 | 7.206624528 | 0           | 5.183969236  | 0.00604044  | 0.016969796 | NUTM2HP    |
| ENSG00000151148 | 808.2207961 | 1168.144429 | -0.53122157  | 0.006041266 | 0.016970282 | UBE3B      |
| ENSG00000169397 | 6.983944366 | 0           | 5.13744102   | 0.006044766 | 0.016978277 | RNASE3     |
| ENSG00000236526 | 13.06384832 | 0.693008929 | 4.206103284  | 0.006053432 | 0.01700078  | AL035448.1 |
| ENSG00000162494 | 81.95225224 | 5.127325134 | 3.989011287  | 0.006062147 | 0.017023416 | LRRC38     |
| ENSG00000260593 | 7.354014143 | 0           | 5.211003876  | 0.006063131 | 0.017024338 | AC009097.2 |
| ENSG00000166133 | 161.049583  | 265.883415  | -0.723635635 | 0.006068129 | 0.017036532 | RPUSD2     |
| ENSG00000130717 | 878.4721503 | 592.671421  | 0.567609329  | 0.006072571 | 0.017047161 | UCK1       |
| ENSG00000204745 | 32.58973648 | 70.19973023 | -1.107387016 | 0.006086716 | 0.017085023 | AC083899.1 |
| ENSG00000170836 | 378.2427204 | 222.5612211 | 0.763729461  | 0.006089744 | 0.017091677 | PPM1D      |
| novel.577       | 8.237497632 | 0.387220594 | 4.412843163  | 0.006091603 | 0.017095047 | -          |
| ENSG00000259702 | 8.589660321 | 0           | 5.438097505  | 0.006095696 | 0.017104686 | AC024337.1 |
| ENSG00000115827 | 489.5277627 | 302.6943205 | 0.692575553  | 0.006098118 | 0.017109632 | DCAF17     |
| ENSG00000187653 | 1135.980401 | 652.3125105 | 0.800022147  | 0.00610584  | 0.01712945  | TMSB4XP8   |
| ENSG00000258461 | 35.95496879 | 9.04912588  | 1.99487994   | 0.006109179 | 0.017136967 | AC012651.1 |
| ENSG00000184313 | 15.72572416 | 0.672939833 | 4.493896258  | 0.006111672 | 0.017142109 | MROH7      |
| ENSG00000162757 | 38.03455081 | 90.82875619 | -1.255467832 | 0.006115556 | 0.017151115 | C1orf74    |
| ENSG00000075711 | 1462.519083 | 996.1137736 | 0.554032785  | 0.006118938 | 0.017158783 | DLG1       |
| ENSG00000126261 | 1431.028057 | 2184.0566   | -0.61005701  | 0.006124237 | 0.017171789 | UBA2       |
| ENSG00000184922 | 975.3681446 | 421.2305787 | 1.211898184  | 0.006127627 | 0.017179441 | FMNL1      |
| ENSG00000163710 | 18.44848716 | 120.2917518 | -2.705877686 | 0.006130251 | 0.017184942 | PCOLCE2    |
| ENSG00000287672 | 2.418994764 | 12.81995886 | -2.40739106  | 0.006141243 | 0.017213173 | AC003086.1 |
| ENSG00000211451 | 48.64806315 | 21.52315821 | 1.176684896  | 0.006141646 | 0.017213173 | GNRHR2     |
| ENSG00000162385 | 454.395133  | 676.9946682 | -0.575601737 | 0.006143544 | 0.017213306 | MAGOH      |
| ENSG00000237886 | 53.07823054 | 16.40760144 | 1.69871912   | 0.006143613 | 0.017213306 | NALT1      |
| ENSG00000123130 | 939.2656176 | 1470.783774 | -0.646829301 | 0.006143681 | 0.017213306 | ACOT9      |
| ENSG00000170265 | 543.2592038 | 817.1006226 | -0.588933989 | 0.006145034 | 0.017215238 | ZNF282     |
| ENSG00000178149 | 357.8308414 | 521.1086489 | -0.542066289 | 0.006147487 | 0.017220255 | DALRD3     |
| ENSG00000164483 | 30.62293975 | 5.941904515 | 2.35302744   | 0.006152827 | 0.017233354 | SAMD3      |
| ENSG00000169490 | 750.3234357 | 1255.848887 | -0.743352887 | 0.006175391 | 0.017294689 | TM2D2      |
| ENSG00000251257 | 2.989107754 | 15.53050302 | -2.367369801 | 0.006187232 | 0.017325984 | AC010457.1 |
| ENSG00000273765 | 7.154939844 | 0           | 5.174383888  | 0.006194643 | 0.017344868 | AC024257.4 |
| ENSG00000235552 | 802.881557  | 1353.913089 | -0.753904764 | 0.006195926 | 0.017346589 | RPL6P27    |
| ENSG00000082512 | 416.7069467 | 237.9383163 | 0.807373044  | 0.006200216 | 0.017356731 | TRAF5      |

|                 |             |             |              |             |             |            |
|-----------------|-------------|-------------|--------------|-------------|-------------|------------|
| novel.521       | 164.4037178 | 55.05383208 | 1.580319741  | 0.00620095  | 0.017356915 | -          |
| ENSG00000097096 | 116.2765475 | 36.65022435 | 1.661514636  | 0.00620342  | 0.017361959 | SYDE2      |
| ENSG00000197343 | 1432.533527 | 953.9516536 | 0.586785373  | 0.006211096 | 0.017381567 | ZNF655     |
| ENSG00000257277 | 6.582319557 | 0           | 5.053858923  | 0.006213899 | 0.01738754  | AC092652.2 |
| ENSG00000113504 | 170.1357026 | 43.22377463 | 1.973759885  | 0.006215757 | 0.017390867 | SLC12A7    |
| ENSG00000250863 | 7.458281153 | 0           | 5.234090221  | 0.006225624 | 0.017416597 | AC114757.1 |
| ENSG00000055208 | 2893.096167 | 1675.409043 | 0.788264568  | 0.006226516 | 0.017417216 | TAB2       |
| ENSG00000089682 | 295.9009088 | 173.6325996 | 0.769653412  | 0.006236393 | 0.017442966 | RBM41      |
| ENSG00000173253 | 11.96563383 | 0           | 5.913963516  | 0.006242604 | 0.017458459 | DMRT2      |
| ENSG00000070882 | 631.9236015 | 332.4530527 | 0.926289211  | 0.006244144 | 0.017460887 | OSBPL3     |
| ENSG00000185608 | 479.8320813 | 694.8577758 | -0.534347154 | 0.006249022 | 0.017472647 | MRPL40     |
| ENSG00000101928 | 167.9359556 | 278.4884272 | -0.730460342 | 0.006254635 | 0.017486459 | MOSPD1     |
| ENSG00000164379 | 21.77256253 | 204.0028959 | -3.228395865 | 0.006263919 | 0.01751053  | FOXQ1      |
| ENSG00000234418 | 6.370993505 | 0           | 5.004978904  | 0.00626817  | 0.017518652 | AC015983.2 |
| ENSG00000227403 | 3.620934617 | 17.62831464 | -2.276466223 | 0.006268292 | 0.017518652 | LINC01806  |
| ENSG00000279526 | 6.729709172 | 0           | 5.083013515  | 0.006268847 | 0.017518652 | AC011239.2 |
| ENSG00000157657 | 490.7270096 | 799.8708386 | -0.704586964 | 0.006273258 | 0.017529095 | ZNF618     |
| ENSG00000198830 | 3421.919394 | 6768.599134 | -0.984107588 | 0.006274893 | 0.017531778 | HMG2N2     |
| ENSG00000213465 | 1520.53349  | 947.242689  | 0.682934613  | 0.006276319 | 0.017533874 | ARL2       |
| ENSG00000120075 | 23.69694831 | 132.3898652 | -2.483313891 | 0.006281711 | 0.017547052 | HOXB5      |
| ENSG00000168939 | 36.73787494 | 102.9767555 | -1.484607927 | 0.006287639 | 0.017559877 | SPRY3      |
| ENSG00000100079 | 31.42959431 | 9.345457604 | 1.749370599  | 0.006287654 | 0.017559877 | LGALS2     |
| ENSG00000116668 | 180.9459404 | 82.77380408 | 1.130312553  | 0.00628982  | 0.017564038 | SWT1       |
| ENSG00000272037 | 26.16963686 | 7.530925084 | 1.797734802  | 0.006292624 | 0.01756998  | AP002907.1 |
| ENSG00000138073 | 955.1210236 | 1393.088937 | -0.544471603 | 0.006295062 | 0.0175749   | PREB       |
| ENSG00000204335 | 15.7161219  | 0           | 6.30738984   | 0.006295988 | 0.017575596 | SP5        |
| ENSG00000269743 | 70.90631657 | 34.73979428 | 1.028216863  | 0.006297568 | 0.017578117 | SLC25A53   |
| ENSG00000057657 | 249.4910285 | 985.8042475 | -1.982201718 | 0.006298682 | 0.017579339 | PRDM1      |
| novel.1000      | 0.308355904 | 16.1818327  | -5.632423432 | 0.006304521 | 0.017593745 | -          |
| novel.912       | 0           | 11.84135909 | -6.148472713 | 0.006305206 | 0.017593766 | -          |
| ENSG00000254109 | 44.41514658 | 14.66517296 | 1.598537448  | 0.006308294 | 0.017600492 | RBPMS-AS1  |
| ENSG00000254837 | 84.44625352 | 42.35215162 | 0.99497798   | 0.00631355  | 0.017613265 | AP001372.2 |
| ENSG00000272872 | 7.644676422 | 0           | 5.267222365  | 0.006317641 | 0.017622786 | AP000525.1 |
| ENSG00000266554 | 6.304193765 | 0           | 4.991226013  | 0.006319331 | 0.017625607 | LINC01443  |
| ENSG00000132688 | 8845.006356 | 1551.866634 | 2.510773434  | 0.006324662 | 0.017636061 | NES        |
| ENSG00000151806 | 345.1031424 | 610.1589948 | -0.822557405 | 0.006325004 | 0.017636061 | GUF1       |
| ENSG00000047188 | 837.5083116 | 544.0707586 | 0.622170931  | 0.006325115 | 0.017636061 | YTHDC2     |
| ENSG00000058668 | 1500.605548 | 3377.325697 | -1.170247519 | 0.006327176 | 0.017639913 | ATP2B4     |
| ENSG00000115993 | 2062.763127 | 1234.200198 | 0.740802294  | 0.006333709 | 0.017656234 | TRAK2      |
| ENSG00000271784 | 8.202252925 | 0.336469917 | 4.407396672  | 0.006334788 | 0.017657347 | AL031055.1 |
| novel.410       | 49.21420138 | 12.60608688 | 1.975172345  | 0.006343431 | 0.017679541 | -          |
| ENSG00000166123 | 1268.71173  | 717.6037365 | 0.82222609   | 0.006345877 | 0.01768446  | GPT2       |
| ENSG00000162069 | 0           | 7.927473894 | -5.563219271 | 0.006347713 | 0.017687679 | BICDL2     |
| ENSG00000171863 | 6310.341709 | 10165.40854 | -0.687898425 | 0.006359007 | 0.017717249 | RPS7       |
| ENSG00000257322 | 9.915099193 | 0.387220594 | 4.682428489  | 0.006359762 | 0.017717453 | AC138123.1 |
| ENSG00000079335 | 132.9189473 | 59.59684169 | 1.156770223  | 0.006361835 | 0.017721328 | CDC14A     |
| ENSG00000179088 | 9.202824645 | 0           | 5.53489482   | 0.00636411  | 0.017725766 | C12orf42   |
| ENSG00000255622 | 6.598688262 | 0           | 5.057100995  | 0.00638357  | 0.017778062 | PCDHB17P   |
| ENSG00000270207 | 6.593673666 | 0           | 5.056106801  | 0.006387978 | 0.017786525 | AC077690.1 |
| ENSG00000255750 | 6.593673666 | 0           | 5.056106801  | 0.006387978 | 0.017786525 | AC022509.1 |
| ENSG00000119596 | 1037.324051 | 1482.780582 | -0.515415234 | 0.006395941 | 0.017806787 | YLPM1      |

|                 |             |             |              |             |             |            |
|-----------------|-------------|-------------|--------------|-------------|-------------|------------|
| ENSG00000272323 | 19.79892809 | 3.873490212 | 2.341340478  | 0.006402895 | 0.017824238 | AC026801.2 |
| ENSG00000233237 | 827.5997973 | 363.6411855 | 1.186205729  | 0.006403745 | 0.017824695 | LINC00472  |
| ENSG00000245975 | 17.3005971  | 3.302051734 | 2.404346479  | 0.006406949 | 0.017831703 | AC090515.2 |
| ENSG00000279569 | 41.51393713 | 6.938261635 | 2.586803522  | 0.0064142   | 0.017849972 | AC020763.4 |
| ENSG00000075624 | 58238.03705 | 99741.50426 | -0.776235655 | 0.006428342 | 0.017887411 | ACTB       |
| ENSG00000132153 | 1593.867888 | 2435.764523 | -0.611941979 | 0.006435054 | 0.017904169 | DHX30      |
| ENSG00000132661 | 232.8923924 | 369.5831847 | -0.666763964 | 0.006445521 | 0.017931372 | NXT1       |
| ENSG00000258702 | 11.89367696 | 0.774441189 | 4.010881438  | 0.006446934 | 0.017933384 | AL137786.1 |
| ENSG00000237506 | 259.8517602 | 998.7734856 | -1.942370327 | 0.006456846 | 0.01795903  | RPSAP15    |
| ENSG00000114391 | 6268.303736 | 9553.442563 | -0.607972881 | 0.006465334 | 0.017980716 | RPL24      |
| ENSG00000077549 | 3463.886073 | 5438.790139 | -0.650855954 | 0.006471242 | 0.017995218 | CAPZB      |
| ENSG00000267372 | 13.43044188 | 1.793307549 | 2.902433746  | 0.00647545  | 0.018004994 | AC005330.1 |
| ENSG00000227388 | 16.56289357 | 2.455634897 | 2.738189143  | 0.006478571 | 0.018011745 | AL133410.1 |
| ENSG00000140471 | 290.7298182 | 173.3046531 | 0.745575601  | 0.006479486 | 0.018011857 | LINS1      |
| ENSG00000135387 | 4025.410422 | 5952.682897 | -0.564455083 | 0.006479998 | 0.018011857 | CAPRIN1    |
| ENSG00000196810 | 382.2086515 | 248.1292448 | 0.623738174  | 0.006484042 | 0.018020873 | CTBP1-DT   |
| ENSG00000108666 | 237.254578  | 380.3648973 | -0.680973312 | 0.006484629 | 0.018020873 | C17orf75   |
| novel.875       | 77.29332278 | 26.49005897 | 1.537998714  | 0.006488005 | 0.018028327 | -          |
| novel.829       | 23.39582957 | 2.0188195   | 3.500202114  | 0.006490922 | 0.018034503 | -          |
| ENSG00000133328 | 10.8426742  | 0.713078025 | 3.919826508  | 0.006497376 | 0.018050506 | PLAAT2     |
| ENSG00000285972 | 8.364472862 | 0           | 5.399108762  | 0.006517174 | 0.01810357  | CERNA2     |
| ENSG00000003249 | 177.1682274 | 56.18558298 | 1.660508681  | 0.006526997 | 0.01812855  | DBNDD1     |
| ENSG00000197753 | 15.70587925 | 42.50311939 | -1.432970063 | 0.006527562 | 0.01812855  | LHFPL5     |
| ENSG00000269553 | 11.28706561 | 0.774441189 | 3.93700973   | 0.006540979 | 0.018163871 | U62631.1   |
| ENSG00000262089 | 41.95735963 | 15.03348034 | 1.480321514  | 0.006541778 | 0.018164147 | AC040977.1 |
| ENSG00000266588 | 10.13047093 | 0.356539013 | 4.711118185  | 0.006565505 | 0.018228081 | AC006441.4 |
| ENSG00000016864 | 1367.094958 | 2019.453734 | -0.562914147 | 0.006570704 | 0.018239053 | GLT8D1     |
| ENSG00000010310 | 7.340152735 | 59.35275484 | -3.015707927 | 0.006570861 | 0.018239053 | GIPR       |
| ENSG00000115365 | 1007.799523 | 1494.569508 | -0.568468869 | 0.006572727 | 0.018242283 | LANCL1     |
| ENSG00000204120 | 1069.797296 | 1541.56198  | -0.526946725 | 0.006585082 | 0.018274622 | GIGYF2     |
| ENSG00000139517 | 283.2140117 | 151.8005365 | 0.898660085  | 0.006592614 | 0.018293572 | LNX2       |
| ENSG00000108468 | 985.5191003 | 1886.967633 | -0.93725157  | 0.006600477 | 0.018313433 | CBX1       |
| novel.11        | 14.31281426 | 1.080229524 | 3.729937301  | 0.006602438 | 0.018316918 | -          |
| ENSG00000058453 | 1189.64371  | 678.4428883 | 0.810514306  | 0.0066034   | 0.018317632 | CROCC      |
| ENSG00000158406 | 43.78765013 | 18.0168195  | 1.282140792  | 0.006610338 | 0.018334921 | HIST1H4H   |
| ENSG00000157131 | 0           | 11.93083529 | -6.156005853 | 0.006612966 | 0.018339009 | C8A        |
| novel.641       | 31.55023002 | 8.864907996 | 1.844531539  | 0.006613224 | 0.018339009 | -          |
| ENSG00000249242 | 111.9873861 | 37.85878401 | 1.564877879  | 0.006620343 | 0.018356792 | TMEM150C   |
| ENSG00000173267 | 252.0187198 | 82.96449049 | 1.601223467  | 0.006632565 | 0.018388716 | SNCG       |
| ENSG00000090581 | 1868.747444 | 1222.737246 | 0.612147274  | 0.006640089 | 0.018407613 | GNPTG      |
| ENSG00000120533 | 944.9044496 | 1425.933807 | -0.593630008 | 0.006643027 | 0.018413794 | ENY2       |
| ENSG00000168497 | 645.6666374 | 91.48544538 | 2.818098735  | 0.006658008 | 0.018453351 | CAVIN2     |
| ENSG00000177483 | 22.63179941 | 5.186248153 | 2.143891931  | 0.006661713 | 0.01846165  | RBM44      |
| ENSG00000162542 | 651.2434644 | 318.1606819 | 1.032761809  | 0.006667485 | 0.018475674 | TMCO4      |
| ENSG00000286067 | 49.63678256 | 140.1879343 | -1.496237917 | 0.006672925 | 0.018488777 | AC004263.2 |
| ENSG00000236268 | 9.537649715 | 0           | 5.586333708  | 0.006676551 | 0.018496851 | LINC01361  |
| ENSG00000137161 | 1860.074736 | 1124.989946 | 0.725469747  | 0.006679774 | 0.018503495 | CNPY3      |
| ENSG00000112237 | 490.5815853 | 821.1375377 | -0.743570271 | 0.006680374 | 0.018503495 | CCNC       |
| ENSG00000228570 | 14.08719953 | 2.180528143 | 2.70289702   | 0.006682523 | 0.018507475 | NUTM2E     |
| ENSG00000272908 | 26.29836393 | 3.048298346 | 3.081185512  | 0.006683957 | 0.018509475 | AC006033.2 |
| ENSG00000125826 | 1727.801953 | 2470.011216 | -0.515609863 | 0.006692009 | 0.018529797 | RBCK1      |



|                 |             |             |              |             |             |            |
|-----------------|-------------|-------------|--------------|-------------|-------------|------------|
| ENSG00000148082 | 388.3751726 | 1072.709546 | -1.465464188 | 0.006714989 | 0.018590061 | SHC3       |
| ENSG00000257093 | 30.38869201 | 8.847279044 | 1.772885501  | 0.006715709 | 0.018590061 | KIAA1147   |
| ENSG00000140521 | 1048.629752 | 1645.646145 | -0.649972008 | 0.00671592  | 0.018590061 | POLG       |
| ENSG00000183762 | 225.5241883 | 602.2959284 | -1.417009985 | 0.006722517 | 0.018606341 | KREMEN1    |
| ENSG00000285106 | 20.35238764 | 63.63905701 | -1.6413699   | 0.006729562 | 0.018623855 | AC016831.7 |
| ENSG00000250423 | 14.47893734 | 0           | 6.189053616  | 0.006740112 | 0.018649496 | KIAA1210   |
| ENSG00000015475 | 460.1888751 | 918.4493159 | -0.99688706  | 0.006740263 | 0.018649496 | BID        |
| ENSG00000267213 | 4.598940661 | 28.77452862 | -2.653131525 | 0.006744415 | 0.018658997 | AC007773.1 |
| ENSG00000108510 | 1262.453979 | 829.4192129 | 0.606014981  | 0.006776171 | 0.018744858 | MED13      |
| ENSG00000244357 | 6.036168435 | 0           | 4.927832434  | 0.006777497 | 0.018746529 | RN7SL145P  |
| ENSG00000116754 | 6281.659164 | 3465.458292 | 0.85813596   | 0.00678033  | 0.01875237  | SRSF11     |
| ENSG00000124574 | 526.0825764 | 798.3873606 | -0.601687958 | 0.006793423 | 0.018786447 | ABCC10     |
| ENSG00000250326 | 22.08439464 | 6.24640858  | 1.836920921  | 0.006794098 | 0.018786447 | AC104596.1 |
| ENSG00000167641 | 1415.438682 | 64.19959185 | 4.461885139  | 0.006799794 | 0.018800198 | PPP1R14A   |
| ENSG00000225465 | 41.89836652 | 6.809674718 | 2.604588414  | 0.006803997 | 0.018809149 | RFPL1S     |
| ENSG00000235033 | 43.69388303 | 11.3843462  | 1.93854779   | 0.00680448  | 0.018809149 | AL590999.1 |
| ENSG00000238178 | 9.33613939  | 0.693008929 | 3.715391583  | 0.006828538 | 0.018873644 | AC078993.1 |
| ENSG00000166801 | 1354.960158 | 810.5625867 | 0.741116843  | 0.006832871 | 0.018883612 | FAM111A    |
| ENSG00000105866 | 174.5030179 | 90.85481427 | 0.943886368  | 0.006838554 | 0.018897305 | SP4        |
| ENSG00000197375 | 219.2410659 | 124.359734  | 0.819182884  | 0.006847122 | 0.018918971 | SLC22A5    |
| ENSG00000130224 | 213.2176478 | 112.5753714 | 0.922044999  | 0.006848398 | 0.018920484 | LRCH2      |
| ENSG00000273058 | 26.98130601 | 7.072884716 | 1.925432308  | 0.006853594 | 0.018932827 | AL359921.2 |
| ENSG00000227355 | 7.59306301  | 0.336469917 | 4.296009743  | 0.006875637 | 0.0189917   | AL359644.1 |
| ENSG00000123453 | 178.5476444 | 92.17057312 | 0.951680406  | 0.006877816 | 0.018994425 | SARDH      |
| ENSG00000138246 | 1217.375794 | 1776.282981 | -0.54517561  | 0.006878086 | 0.018994425 | DNAJC13    |
| ENSG00000108528 | 1028.498758 | 1649.068825 | -0.681305089 | 0.00688365  | 0.019007771 | SLC25A11   |
| ENSG00000103249 | 841.8245659 | 1305.808897 | -0.633158501 | 0.006889474 | 0.01902183  | CLCN7      |
| ENSG00000221866 | 43.31678921 | 6.612404203 | 2.717973733  | 0.006895174 | 0.019035546 | PLXNA4     |
| ENSG00000146278 | 2433.964695 | 1272.010506 | 0.936459228  | 0.006905376 | 0.019061685 | PNRC1      |
| ENSG00000242267 | 10.85528196 | 0.672939833 | 3.949045363  | 0.006917719 | 0.019093728 | SKINT1L    |
| ENSG00000169057 | 1568.9288   | 948.7002707 | 0.725950882  | 0.006926149 | 0.019114965 | MECP2      |
| ENSG00000233622 | 49.84144092 | 22.18548556 | 1.165449352  | 0.006934385 | 0.0191347   | CYP2T1P    |
| ENSG00000228307 | 12.89689852 | 0.743759607 | 4.145875885  | 0.006934773 | 0.0191347   | OR2S1P     |
| ENSG00000197168 | 31.95790961 | 11.09862696 | 1.52549132   | 0.006937393 | 0.019139897 | NEK5       |
| ENSG00000162746 | 145.0207592 | 44.76435628 | 1.692440376  | 0.006939671 | 0.019144149 | FCRLB      |
| ENSG00000198160 | 920.6761082 | 641.1819992 | 0.52204721   | 0.006941988 | 0.019148508 | MIER1      |
| ENSG00000248458 | 0.616711807 | 12.83758781 | -4.392516904 | 0.006946291 | 0.019158342 | AL139147.1 |
| ENSG00000163344 | 801.8842053 | 409.9120346 | 0.967337183  | 0.006947041 | 0.019158378 | PMVK       |
| ENSG00000101417 | 297.7603892 | 193.6221586 | 0.620559123  | 0.00695284  | 0.019172334 | PXMP4      |
| ENSG00000272839 | 6.08527455  | 0           | 4.938348403  | 0.006954519 | 0.019174931 | AC011899.3 |
| novel.957       | 411.1875205 | 3.005720009 | 7.100392914  | 0.006961126 | 0.019191108 | -          |
| ENSG00000233393 | 14.34895661 | 1.069617038 | 3.740737517  | 0.006963809 | 0.019196468 | AP000688.2 |
| ENSG00000150540 | 397.1059227 | 162.4931581 | 1.288296191  | 0.006964574 | 0.019196541 | HNMT       |
| ENSG00000090971 | 581.5508969 | 1011.871588 | -0.798710231 | 0.006966138 | 0.019198151 | NAT14      |
| ENSG00000274964 | 66.45140403 | 20.31190163 | 1.709072294  | 0.006967352 | 0.019198151 | AC026356.1 |
| ENSG00000258777 | 0           | 13.22267223 | -6.308382657 | 0.006967375 | 0.019198151 | HIF1A-AS1  |
| ENSG00000115607 | 15.54233439 | 1.345879667 | 3.482218783  | 0.006969888 | 0.019203039 | IL18RAP    |
| ENSG00000104848 | 0.293240848 | 7.64188305  | -4.550914917 | 0.006975089 | 0.019215331 | KCNA7      |
| ENSG00000179148 | 0           | 7.143576095 | -5.412613507 | 0.006978494 | 0.019222673 | ALOXE3     |
| ENSG00000150527 | 283.0522896 | 450.0277918 | -0.668417983 | 0.006979811 | 0.019224262 | MIA2       |
| ENSG00000071189 | 1027.148421 | 669.7704174 | 0.616955551  | 0.00698705  | 0.01924216  | SNX13      |

|                 |             |             |              |             |             |            |
|-----------------|-------------|-------------|--------------|-------------|-------------|------------|
| ENSG00000168505 | 11.39154608 | 0           | 5.842836125  | 0.006995408 | 0.019263137 | GBX2       |
| ENSG00000224114 | 15.3574775  | 1.049547942 | 3.849928169  | 0.006998506 | 0.019269624 | AL591846.1 |
| ENSG00000242516 | 49.67377911 | 185.1085366 | -1.89874973  | 0.00700038  | 0.019272742 | LINC00960  |
| ENSG00000228784 | 26.26659544 | 7.672564631 | 1.785630926  | 0.007002988 | 0.019277879 | LINC00954  |
| ENSG00000167619 | 14.54426997 | 2.149846562 | 2.756233686  | 0.007005818 | 0.019283628 | TMEM145    |
| ENSG00000270124 | 1.49643435  | 20.74383674 | -3.785206028 | 0.007007615 | 0.019286012 | AC092127.2 |
| ENSG00000246100 | 91.21099394 | 15.08996321 | 2.602872621  | 0.007008169 | 0.019286012 | LINC00900  |
| ENSG00000185915 | 11.37768468 | 0           | 5.841134639  | 0.007010007 | 0.019289028 | KLHL34     |
| ENSG00000267857 | 0.293240848 | 8.568704665 | -4.719434226 | 0.007012053 | 0.019292614 | AL133499.1 |
| ENSG00000272361 | 8.216114332 | 0.336469917 | 4.409593182  | 0.007013251 | 0.019293865 | AC005014.2 |
| ENSG00000230965 | 12.16274247 | 0.387220594 | 4.977800245  | 0.007014046 | 0.01929401  | SNX18P13   |
| ENSG00000130950 | 6.314294226 | 0           | 4.993275207  | 0.007016281 | 0.019296155 | NUTM2F     |
| ENSG00000107614 | 336.7776922 | 151.7680099 | 1.150681482  | 0.007016311 | 0.019296155 | TRDMT1     |
| ENSG00000266213 | 6.009699269 | 0           | 4.922128378  | 0.007020734 | 0.019306276 | AC107892.1 |
| ENSG00000130340 | 991.7734355 | 1888.22319  | -0.928791495 | 0.007025872 | 0.019318359 | SNX9       |
| ENSG00000286412 | 15.62493336 | 0           | 6.300247145  | 0.007036693 | 0.019346066 | AC007682.1 |
| ENSG00000159658 | 2350.950079 | 1558.55441  | 0.5930356    | 0.00704335  | 0.019360419 | EFCAB14    |
| ENSG00000100218 | 8.25010539  | 0.387220594 | 4.41490346   | 0.007043404 | 0.019360419 | RSPH14     |
| ENSG00000169122 | 248.3908331 | 83.12461089 | 1.579202719  | 0.007047681 | 0.019370126 | FAM110B    |
| ENSG00000258457 | 26.8556557  | 7.418811243 | 1.847876357  | 0.007054247 | 0.019386123 | AL132780.2 |
| ENSG00000125878 | 15.32466882 | 1.487519214 | 3.388794357  | 0.007059555 | 0.019398656 | TCF15      |
| ENSG00000066468 | 25.55342325 | 0.672939833 | 5.204063439  | 0.007061979 | 0.019403266 | FGFR2      |
| ENSG00000072134 | 290.8766224 | 537.1534524 | -0.884942546 | 0.007063497 | 0.019405385 | EPN2       |
| ENSG00000198668 | 9355.982119 | 6322.114187 | 0.565435365  | 0.007079077 | 0.019446129 | CALM1      |
| ENSG00000286721 | 6.289078709 | 0           | 4.988036675  | 0.007095276 | 0.019488568 | AC010623.1 |
| ENSG00000253177 | 6.28782506  | 0           | 4.987777354  | 0.00709654  | 0.019489978 | AC104211.2 |
| ENSG00000104067 | 165.0588502 | 69.60146298 | 1.242622489  | 0.00710514  | 0.019511536 | TJP1       |
| ENSG00000150593 | 1511.014527 | 964.9145019 | 0.647261728  | 0.007110311 | 0.019523673 | PDCD4      |
| ENSG00000106400 | 1480.832133 | 2223.971235 | -0.58658731  | 0.007120864 | 0.019550583 | ZNHIT1     |
| ENSG00000178202 | 913.8580158 | 1692.496757 | -0.88931808  | 0.00712358  | 0.019554272 | POGLUT3    |
| ENSG00000144524 | 565.7964528 | 888.2888756 | -0.650699845 | 0.007123713 | 0.019554272 | COPS7B     |
| ENSG00000269001 | 162.6591309 | 89.40170106 | 0.864602822  | 0.007128442 | 0.019565186 | AC092070.2 |
| ENSG00000200087 | 5.642136789 | 33.26545609 | -2.555510038 | 0.007155172 | 0.019636477 | SNORA73B   |
| ENSG00000065609 | 20.62968671 | 1.41669944  | 3.855382857  | 0.007163961 | 0.019658521 | SNAP91     |
| ENSG00000177380 | 88.59091577 | 245.1127711 | -1.467840476 | 0.007170087 | 0.019673252 | PPFIA3     |
| ENSG00000259124 | 5.745434885 | 0           | 4.856343222  | 0.007170857 | 0.019673287 | AC008050.1 |
| ENSG00000184232 | 7435.700191 | 2860.468051 | 1.378280533  | 0.007175445 | 0.019683797 | OAF        |
| ENSG00000162813 | 463.5224536 | 733.2252353 | -0.662081715 | 0.007181144 | 0.019697351 | BPNT1      |
| ENSG00000164073 | 416.0104999 | 269.7322126 | 0.624230193  | 0.00718358  | 0.019699544 | MFSD8      |
| ENSG00000125995 | 798.4473012 | 1267.089912 | -0.66627765  | 0.007183941 | 0.019699544 | ROMO1      |
| ENSG00000146776 | 182.5229647 | 98.01632329 | 0.898253769  | 0.0071845   | 0.019699544 | ATXN7L1    |
| ENSG00000198106 | 7.550225139 | 0.356539013 | 4.288935648  | 0.007184976 | 0.019699544 | AC025279.1 |
| ENSG00000128283 | 2288.24384  | 1468.150497 | 0.640106586  | 0.007185964 | 0.019700172 | CDC42EP1   |
| ENSG00000119685 | 357.2450714 | 592.8777029 | -0.730601389 | 0.007216954 | 0.019783042 | TTLL5      |
| ENSG00000237938 | 7.796867169 | 26.53580097 | -1.759639542 | 0.00721838  | 0.019784864 | AL450998.3 |
| ENSG00000241494 | 131.8977474 | 240.1155395 | -0.864285401 | 0.00722907  | 0.019812075 | AL355032.1 |
| ENSG00000281091 | 5.768143105 | 26.12277908 | -2.182617309 | 0.007237491 | 0.019833063 | AL117327.1 |
| ENSG00000156603 | 254.3711724 | 439.0782661 | -0.788203534 | 0.007242531 | 0.01984478  | MED19      |
| ENSG00000198089 | 325.1202283 | 560.7355811 | -0.786147355 | 0.007268903 | 0.01991494  | SFI1       |
| ENSG00000224023 | 8.38710981  | 0.336469917 | 4.441724231  | 0.00727142  | 0.019919734 | EDRF1-DT   |
| ENSG00000100711 | 898.7911164 | 573.0052449 | 0.648933769  | 0.007282815 | 0.019945073 | ZFYVE21    |

|                 |             |             |              |             |             |            |
|-----------------|-------------|-------------|--------------|-------------|-------------|------------|
| ENSG00000230061 | 6.094121362 | 0           | 4.940262464  | 0.007282973 | 0.019945073 | TRPM2-AS   |
| ENSG00000180044 | 6.094121362 | 0           | 4.940262464  | 0.007282973 | 0.019945073 | C3orf80    |
| ENSG00000136003 | 2354.896433 | 1453.881252 | 0.695707328  | 0.007286609 | 0.019952929 | ISCU       |
| ENSG00000213519 | 6.355878449 | 0           | 5.001873348  | 0.00729027  | 0.019960849 | AC132008.1 |
| ENSG00000261840 | 36.73823095 | 15.14328243 | 1.280409979  | 0.007310365 | 0.020013761 | AC093249.6 |
| ENSG00000117899 | 990.7297245 | 1684.89548  | -0.766281534 | 0.007317496 | 0.020031173 | MESD       |
| novel.372       | 184.110987  | 70.75986707 | 1.382791109  | 0.007327138 | 0.020055455 | -          |
| ENSG00000264577 | 21.52660468 | 65.73473244 | -1.608186618 | 0.007329724 | 0.020060419 | AC010761.2 |
| ENSG00000146535 | 1481.64514  | 2242.793549 | -0.598033797 | 0.00733298  | 0.020067216 | GNA12      |
| ENSG00000182870 | 2.125753916 | 22.72226126 | -3.4157073   | 0.00734178  | 0.020089181 | GALNT9     |
| ENSG00000249628 | 1.832513069 | 14.94947954 | -3.027659046 | 0.007345059 | 0.020096039 | LINC00942  |
| ENSG00000231521 | 6.300432819 | 0           | 4.990379526  | 0.007350175 | 0.020107919 | AL162385.2 |
| ENSG00000257803 | 13.00088079 | 0.356539013 | 5.073990015  | 0.007351491 | 0.020109401 | AC010200.1 |
| ENSG00000013293 | 26.10047201 | 116.8029261 | -2.163143133 | 0.007359309 | 0.020128667 | SLC7A14    |
| ENSG00000168301 | 247.1435362 | 135.7049695 | 0.86607621   | 0.007365465 | 0.020143384 | KCTD6      |
| ENSG00000142676 | 10514.78691 | 16274.24836 | -0.630174493 | 0.007374718 | 0.020166567 | RPL11      |
| ENSG00000225975 | 42.50261311 | 13.12459132 | 1.69023578   | 0.00737728  | 0.020171335 | LINC01534  |
| ENSG00000170476 | 16.64620421 | 0           | 6.390392834  | 0.007378015 | 0.020171335 | MZB1       |
| ENSG00000062582 | 5.749195831 | 22.08154406 | -1.939355474 | 0.007403827 | 0.020239775 | MRPS24     |
| ENSG00000136147 | 1062.598011 | 603.6710555 | 0.816251896  | 0.007421756 | 0.020286653 | PHF11      |
| ENSG00000254987 | 10.22972334 | 0.672939833 | 3.862678572  | 0.007439264 | 0.02033237  | AP002989.1 |
| ENSG00000264017 | 7.880035613 | 0.336469917 | 4.34997037   | 0.007443764 | 0.020342529 | RN7SL336P  |
| ENSG00000237765 | 635.882736  | 428.1584971 | 0.570573099  | 0.007453218 | 0.020366223 | FAM200B    |
| ENSG00000144161 | 216.6188365 | 114.6725879 | 0.915462203  | 0.007461978 | 0.020388016 | ZC3H8      |
| novel.461       | 3.955759687 | 17.3167941  | -2.13683887  | 0.007468254 | 0.020403018 | -          |
| ENSG00000164008 | 92.19957116 | 35.74804815 | 1.366567326  | 0.00747204  | 0.020411217 | C1orf50    |
| ENSG00000258565 | 0           | 5.767143241 | -5.108488899 | 0.007473982 | 0.020412358 | BLZF2P     |
| ENSG00000120555 | 9.334885741 | 0.743759607 | 3.687479029  | 0.00747403  | 0.020412358 | SEPT7P9    |
| ENSG00000140839 | 31.25706045 | 9.853092774 | 1.673140003  | 0.007489174 | 0.020451569 | CLEC18B    |
| ENSG00000101544 | 317.603923  | 558.8641677 | -0.81468217  | 0.007500729 | 0.020479383 | ADNP2      |
| ENSG00000225507 | 55.21018178 | 24.52057749 | 1.173727496  | 0.007500936 | 0.020479383 | AC069282.1 |
| ENSG00000148444 | 336.6913873 | 207.1962327 | 0.700577351  | 0.007507646 | 0.020495551 | COMMD3     |
| ENSG00000271980 | 7.988348304 | 0           | 5.330401043  | 0.007524312 | 0.020538889 | AC012640.4 |
| ENSG00000277977 | 13.96273159 | 2.180528143 | 2.687635181  | 0.007533926 | 0.020562971 | AC010332.1 |
| ENSG00000154227 | 7.151178898 | 0           | 5.173558761  | 0.007557354 | 0.02062475  | CERS3      |
| ENSG00000196205 | 6837.533327 | 11000.72654 | -0.686058875 | 0.007576793 | 0.020675628 | EEF1A1P5   |
| ENSG00000133597 | 493.5415741 | 267.7303458 | 0.881334056  | 0.007598323 | 0.020732203 | ADCK2      |
| ENSG00000175513 | 9.512505469 | 0.336469917 | 4.620263514  | 0.007599226 | 0.02073249  | TSGA10IP   |
| ENSG00000133265 | 715.944938  | 1121.233942 | -0.647330386 | 0.007604438 | 0.020744531 | HSPBP1     |
| ENSG00000154188 | 126.0259773 | 789.782502  | -2.648064558 | 0.007610268 | 0.020756776 | ANGPT1     |
| ENSG00000238246 | 5.775664997 | 0           | 4.863109149  | 0.007611324 | 0.020756776 | AC069549.1 |
| ENSG00000125462 | 5.775664997 | 0           | 4.863109149  | 0.007611324 | 0.020756776 | C1orf61    |
| ENSG00000173452 | 0           | 11.04800468 | -6.04893166  | 0.00761599  | 0.020767321 | TMEM196    |
| ENSG00000136193 | 7432.657101 | 4898.495121 | 0.601600674  | 0.007622416 | 0.020782661 | SCRN1      |
| ENSG00000166848 | 2003.306094 | 1344.798781 | 0.574885234  | 0.007631861 | 0.020806231 | TERF2IP    |
| ENSG00000276115 | 38.67884324 | 12.25096053 | 1.648508683  | 0.007642345 | 0.020832626 | AC026356.2 |
| ENSG00000231875 | 5.730319829 | 0           | 4.85294547   | 0.007650545 | 0.02085279  | AL359885.1 |
| ENSG00000100330 | 237.2727423 | 107.638767  | 1.142660686  | 0.007656411 | 0.020866592 | MTMR3      |
| ENSG00000185070 | 1895.241423 | 401.9536438 | 2.237303095  | 0.007658159 | 0.020869165 | FLRT2      |
| ENSG00000271553 | 20.16996678 | 4.545274171 | 2.134443909  | 0.00766027  | 0.020872731 | AC018638.7 |
| ENSG00000101441 | 7.639733098 | 0           | 5.266423586  | 0.00766492  | 0.020883208 | CST4       |

|                 |             |             |              |             |             |            |
|-----------------|-------------|-------------|--------------|-------------|-------------|------------|
| ENSG00000125691 | 9182.495924 | 14553.34505 | -0.664402688 | 0.007670115 | 0.020895172 | RPL23      |
| ENSG00000260231 | 81.95991738 | 26.53836951 | 1.623207812  | 0.007680415 | 0.020919219 | KDM7A-DT   |
| ENSG00000231760 | 17.78628799 | 3.587770973 | 2.310554985  | 0.007680552 | 0.020919219 | AL355312.2 |
| ENSG00000130935 | 540.910841  | 962.1996764 | -0.831249369 | 0.007686909 | 0.020934338 | NOL11      |
| ENSG00000103257 | 639.2439074 | 2202.47905  | -1.784802518 | 0.007696889 | 0.020959321 | SLC7A5     |
| ENSG00000247626 | 78.70708688 | 145.3378158 | -0.886292207 | 0.007701271 | 0.020969055 | MARS2      |
| ENSG00000105131 | 18.21047848 | 3.12857473  | 2.52035754   | 0.007722389 | 0.021024353 | EPHX3      |
| ENSG00000261025 | 12.40207607 | 1.161661783 | 3.479597388  | 0.007727479 | 0.021036005 | AL445471.2 |
| ENSG00000128710 | 0           | 11.02793558 | -6.046392943 | 0.007738725 | 0.021064412 | HOXD10     |
| ENSG00000225269 | 0           | 5.390535133 | -5.011455058 | 0.007744295 | 0.021076042 | LINC00705  |
| ENSG00000205181 | 122.4017528 | 53.37307074 | 1.194021825  | 0.00774462  | 0.021076042 | LINC00654  |
| ENSG00000159267 | 307.4684649 | 455.6596353 | -0.567926118 | 0.007762751 | 0.02112317  | HLCS       |
| ENSG00000229127 | 40.50723936 | 13.45147623 | 1.596892728  | 0.007769625 | 0.021139661 | AC007038.1 |
| ENSG00000181038 | 310.3891198 | 502.9529211 | -0.696003771 | 0.007771074 | 0.021141389 | METTL23    |
| ENSG00000180228 | 331.7464531 | 491.3977605 | -0.567054581 | 0.007773101 | 0.02114469  | PRKRA      |
| ENSG00000172175 | 290.0297801 | 521.4112607 | -0.846105302 | 0.007774293 | 0.021145718 | MALT1      |
| ENSG00000012983 | 1863.222472 | 1036.174229 | 0.846489899  | 0.007782535 | 0.021165921 | MAP4K5     |
| ENSG00000274893 | 6.568458149 | 0           | 5.05094436   | 0.007785617 | 0.021172086 | AL136317.2 |
| ENSG00000116237 | 1818.801933 | 3037.887294 | -0.740195472 | 0.007806083 | 0.021225521 | ICMT       |
| ENSG00000147687 | 224.731182  | 360.9117756 | -0.684118902 | 0.007814731 | 0.021246812 | TATDN1     |
| ENSG00000232434 | 83.32608592 | 179.7452841 | -1.10898976  | 0.007820225 | 0.021259523 | AJM1       |
| ENSG00000160818 | 381.3199681 | 802.2321548 | -1.073420532 | 0.007837035 | 0.02130149  | GPATCH4    |
| ENSG00000196935 | 417.5637638 | 904.4892447 | -1.114742399 | 0.007837302 | 0.02130149  | SRGAP1     |
| novel.482       | 153.1875254 | 346.8906803 | -1.178721548 | 0.007868262 | 0.021382263 | -          |
| ENSG00000114315 | 545.6951899 | 131.1921404 | 2.055277616  | 0.007868666 | 0.021382263 | HES1       |
| ENSG00000066185 | 19.69688364 | 6.094156548 | 1.691357661  | 0.007872072 | 0.021389279 | ZMYND12    |
| ENSG00000133665 | 12.92963593 | 0           | 6.025729635  | 0.007873431 | 0.021390736 | DYDC2      |
| ENSG00000183077 | 258.1278574 | 483.9333231 | -0.906523919 | 0.007881498 | 0.021410414 | AFMID      |
| ENSG00000281490 | 451.9815408 | 188.2836924 | 1.263667935  | 0.007884238 | 0.021415618 | CICP14     |
| ENSG00000284675 | 6.74231693  | 0           | 5.085619179  | 0.007889578 | 0.021427883 | AC116667.2 |
| ENSG00000145331 | 73.68897033 | 130.7884339 | -0.828919163 | 0.007898894 | 0.021450943 | TRMT10A    |
| ENSG00000092067 | 10.3431219  | 0.713078025 | 3.850286825  | 0.007904687 | 0.021463034 | CEBPE      |
| ENSG00000120256 | 32.7032063  | 83.16590496 | -1.346273466 | 0.007904999 | 0.021463034 | LRP11      |
| ENSG00000125414 | 10.65899969 | 0.774441189 | 3.854442711  | 0.007905903 | 0.021463247 | MYH2       |
| ENSG00000164897 | 615.7911796 | 898.9391287 | -0.545859121 | 0.007925052 | 0.021512985 | TMUB1      |
| ENSG00000223813 | 2.096777453 | 28.80533859 | -3.778124427 | 0.007934393 | 0.021535132 | AC007255.1 |
| ENSG00000177105 | 1444.903875 | 992.7213604 | 0.541590388  | 0.007934869 | 0.021535132 | RHOG       |
| ENSG00000233690 | 8.093868963 | 0.356539013 | 4.390315547  | 0.007952005 | 0.021579385 | EBAG9P1    |
| ENSG00000224897 | 29.24058814 | 9.171852206 | 1.6849322    | 0.007954624 | 0.021584239 | POT1-AS1   |
| ENSG00000134882 | 862.9982372 | 1370.087215 | -0.667027238 | 0.007957602 | 0.021590063 | UBAC2      |
| novel.1053      | 31.8408923  | 5.830946549 | 2.431235805  | 0.007968591 | 0.021617623 | -          |
| ENSG00000174365 | 294.7806421 | 159.5486728 | 0.884708795  | 0.007975148 | 0.021633152 | SNHG11     |
| ENSG00000154001 | 627.5415133 | 911.8490299 | -0.539337443 | 0.00799682  | 0.021689673 | PPP2R5E    |
| ENSG00000248383 | 12.22717711 | 0.387220594 | 4.983317358  | 0.008001001 | 0.021698748 | PCDHAC1    |
| ENSG00000139174 | 328.1970592 | 88.48618108 | 1.889838083  | 0.00800624  | 0.021710689 | PRICKLE1   |
| ENSG00000144736 | 191.447335  | 325.8205322 | -0.767831859 | 0.008009491 | 0.02171724  | SHQ1       |
| ENSG00000134020 | 16.26116191 | 1.365948763 | 3.538144335  | 0.008014675 | 0.021729027 | PEBP4      |
| ENSG00000169221 | 1070.721312 | 1637.44276  | -0.612658989 | 0.008017874 | 0.021735433 | TBC1D10B   |
| ENSG00000166913 | 4393.132037 | 6567.87409  | -0.580181897 | 0.008023876 | 0.021749434 | YWHAB      |
| ENSG00000162366 | 0           | 11.21775727 | -6.066885966 | 0.00804598  | 0.021807075 | PDZK1IP1   |
| ENSG00000167525 | 153.0707219 | 75.78697512 | 1.016767526  | 0.00805018  | 0.02181618  | PROCA1     |

|                 |             |             |              |             |             |            |
|-----------------|-------------|-------------|--------------|-------------|-------------|------------|
| ENSG00000168993 | 36.15314509 | 7.765893646 | 2.211910196  | 0.008063724 | 0.021850606 | CPLX1      |
| ENSG00000222044 | 11.6203523  | 0.723690511 | 4.015076717  | 0.008066887 | 0.021856898 | AL031587.1 |
| ENSG00000137876 | 1224.229271 | 1743.823817 | -0.510471327 | 0.008075164 | 0.021877041 | RSL24D1    |
| novel.724       | 54.49052788 | 118.7893474 | -1.125918041 | 0.008083738 | 0.021897827 | -          |
| ENSG00000093010 | 5174.717859 | 2858.786907 | 0.856058788  | 0.008085287 | 0.021897827 | COMT       |
| ENSG00000204967 | 7.348999548 | 0           | 5.210215389  | 0.008085364 | 0.021897827 | PCDHA4     |
| ENSG00000103145 | 1392.49601  | 784.7803621 | 0.827727046  | 0.008086973 | 0.0218999   | HCFC1R1    |
| ENSG00000287516 | 39.48821856 | 16.85631359 | 1.227026201  | 0.008113483 | 0.0219694   | AL359764.2 |
| ENSG00000164587 | 11335.71986 | 16360.91142 | -0.529384031 | 0.008115066 | 0.021971399 | RPS14      |
| ENSG00000125629 | 461.2668887 | 1044.497316 | -1.178983277 | 0.008117674 | 0.021976168 | INSIG2     |
| ENSG00000079134 | 793.1318866 | 477.050307  | 0.733846448  | 0.008124394 | 0.021992069 | THOC1      |
| ENSG00000087191 | 1674.413527 | 2427.411442 | -0.535846162 | 0.008129995 | 0.022004938 | PSMC5      |
| ENSG00000165724 | 446.4609058 | 724.7451549 | -0.699336274 | 0.008133047 | 0.022010905 | ZMYND19    |
| ENSG00000171853 | 387.2188182 | 747.6127073 | -0.949074546 | 0.008135483 | 0.022015205 | TRAPPC12   |
| ENSG00000173209 | 2152.978144 | 1267.333027 | 0.764683909  | 0.008143097 | 0.022033515 | AHSA2P     |
| ENSG00000093167 | 1799.307703 | 1181.805458 | 0.606621577  | 0.008143963 | 0.022033562 | LRRFIP2    |
| ENSG00000165923 | 10.04730248 | 0.743759607 | 3.789583674  | 0.008149863 | 0.02204723  | AGBL2      |
| ENSG00000139537 | 32.52920498 | 67.74867166 | -1.055887589 | 0.008154607 | 0.022057766 | CCDC65     |
| ENSG00000197586 | 963.8832605 | 1566.889097 | -0.701181032 | 0.008157253 | 0.022060684 | ENTPD6     |
| ENSG00000132591 | 602.8643792 | 974.6562903 | -0.693182314 | 0.008157384 | 0.022060684 | ERAL1      |
| ENSG00000280587 | 0           | 5.319715359 | -4.994672855 | 0.00816076  | 0.022067518 | LINC01348  |
| ENSG00000103429 | 22.7048674  | 50.13340965 | -1.145017445 | 0.008170392 | 0.022091263 | BFAR       |
| ENSG00000231178 | 8.267799015 | 0           | 5.380375184  | 0.00818363  | 0.022124753 | AL357832.1 |
| ENSG00000271993 | 34.06192422 | 7.817800198 | 2.120997211  | 0.00818819  | 0.022134778 | AC126118.1 |
| ENSG00000279058 | 21.36313109 | 5.279577167 | 2.006234006  | 0.008195859 | 0.022153205 | AGAP14P    |
| ENSG00000131446 | 2922.180792 | 5580.303587 | -0.933336869 | 0.008204728 | 0.02217487  | MGAT1      |
| ENSG00000082515 | 475.9734227 | 712.1714066 | -0.58132935  | 0.008206578 | 0.022177563 | MRPL22     |
| ENSG00000137691 | 48.88753894 | 136.0104195 | -1.478059069 | 0.008217317 | 0.022204276 | CFAP300    |
| ENSG00000204131 | 194.761693  | 53.27388114 | 1.868604656  | 0.00822202  | 0.022212501 | NHSL2      |
| ENSG00000122566 | 13149.1311  | 20392.07282 | -0.633049188 | 0.008222071 | 0.022212501 | HNRNPA2B1  |
| ENSG00000232000 | 28.0449878  | 6.207554658 | 2.157862747  | 0.008230547 | 0.022233088 | CLCN3P1    |
| ENSG00000124249 | 5.771904051 | 0           | 4.862288347  | 0.008239207 | 0.022251855 | KCNK15     |
| ENSG00000105352 | 5.771904051 | 0           | 4.862288347  | 0.008239207 | 0.022251855 | CEACAM4    |
| ENSG00000241769 | 37.10543742 | 13.55310598 | 1.45051213   | 0.008240479 | 0.022252976 | LINC00893  |
| ENSG00000222071 | 35.89980789 | 5.716264169 | 2.671101818  | 0.008244001 | 0.022260174 | MIR1915    |
| ENSG00000284791 | 6.982690717 | 0           | 5.137238124  | 0.008246045 | 0.022263379 | SMIM41     |
| ENSG00000144674 | 1255.555271 | 2007.188291 | -0.676675455 | 0.008247112 | 0.022263947 | GOLGA4     |
| ENSG00000141279 | 1222.404964 | 2018.652833 | -0.723527463 | 0.008250981 | 0.022272076 | NPEPPS     |
| ENSG00000181873 | 132.3289616 | 217.1385918 | -0.715658526 | 0.008252827 | 0.022274746 | IBA57      |
| novel.425       | 60.92172506 | 9.284094441 | 2.712728198  | 0.008269266 | 0.022316797 | -          |
| ENSG00000272341 | 50.94405709 | 18.80187317 | 1.439717759  | 0.008271785 | 0.022321275 | AL137003.2 |
| ENSG00000162086 | 398.6257094 | 220.109987  | 0.856742677  | 0.008279432 | 0.022339591 | ZNF75A     |
| ENSG00000247095 | 2.932408476 | 200.8862179 | -6.094465385 | 0.008293334 | 0.022374778 | MIR210HG   |
| ENSG00000122970 | 280.4265996 | 473.9726113 | -0.756585435 | 0.008301822 | 0.022395353 | IFT81      |
| ENSG00000198756 | 129.4585796 | 30.96091735 | 2.061377285  | 0.008305566 | 0.022403126 | COLGALT2   |
| ENSG00000265100 | 15.66930962 | 3.566546002 | 2.131557448  | 0.008309276 | 0.022408671 | AC005332.1 |
| ENSG00000116690 | 11.82820214 | 78.622861   | -2.734066473 | 0.008309347 | 0.022408671 | PRG4       |
| ENSG00000185433 | 5.732827126 | 0           | 4.853487914  | 0.00831454  | 0.022420349 | LINC00158  |
| ENSG00000197363 | 274.0878731 | 180.3583207 | 0.604249315  | 0.008319076 | 0.022430252 | ZNF517     |
| ENSG00000186501 | 949.0398809 | 659.8496816 | 0.524298893  | 0.008329626 | 0.022456366 | TMEM222    |
| ENSG00000100628 | 7.645930071 | 0           | 5.267539228  | 0.008335987 | 0.022471186 | ASB2       |

|                 |             |             |              |             |             |            |
|-----------------|-------------|-------------|--------------|-------------|-------------|------------|
| ENSG00000102870 | 649.3413867 | 965.1764873 | -0.571775876 | 0.008337021 | 0.022471642 | ZNF629     |
| ENSG00000109084 | 165.0017518 | 375.6432389 | -1.187723806 | 0.008345019 | 0.022489297 | TMEM97     |
| ENSG00000260604 | 4.252761481 | 23.53508964 | -2.474226074 | 0.008345303 | 0.022489297 | AL590004.3 |
| ENSG00000171132 | 242.7877885 | 127.7718446 | 0.925890046  | 0.008355328 | 0.022513977 | PRKCE      |
| ENSG00000184857 | 112.2598569 | 207.1562701 | -0.88443582  | 0.008384662 | 0.022588352 | TMEM186    |
| ENSG00000135945 | 721.2118917 | 445.172795  | 0.696392559  | 0.008384668 | 0.022588352 | REV1       |
| ENSG00000172766 | 364.0415532 | 224.8700322 | 0.694832065  | 0.008392987 | 0.022608418 | NAA16      |
| ENSG00000162910 | 565.3811366 | 821.9942978 | -0.539684584 | 0.008395713 | 0.022613416 | MRPL55     |
| ENSG00000241218 | 15.10428249 | 3.210006989 | 2.230005904  | 0.008397257 | 0.022615231 | AC063944.2 |
| ENSG00000273456 | 29.25946414 | 9.508450517 | 1.61218795   | 0.008403016 | 0.022628396 | AC064836.3 |
| ENSG00000122390 | 1000.889758 | 665.9648535 | 0.587653243  | 0.008405679 | 0.022633221 | NAA60      |
| ENSG00000279457 | 242.2768397 | 110.9792531 | 1.12559077   | 0.008411222 | 0.022645798 | WASH9P     |
| ENSG00000127663 | 942.1829986 | 1725.411378 | -0.872639985 | 0.008413936 | 0.022650759 | KDM4B      |
| ENSG00000226986 | 3.311325065 | 17.20583614 | -2.378228172 | 0.008422111 | 0.022667861 | AC092017.1 |
| ENSG00000279017 | 12.93465052 | 0           | 6.026288194  | 0.008422259 | 0.022667861 | AC098476.1 |
| ENSG00000287454 | 1.524157165 | 10.11989879 | -2.734714634 | 0.008422906 | 0.022667861 | AC008149.2 |
| ENSG00000245870 | 6.862952646 | 0           | 5.114106285  | 0.008427443 | 0.022677267 | LINC00682  |
| ENSG00000109066 | 443.3862645 | 690.2594049 | -0.639085544 | 0.008428147 | 0.022677267 | TMEM104    |
| ENSG00000119686 | 525.2547162 | 112.8430765 | 2.218834363  | 0.008436347 | 0.022696979 | FLVCR2     |
| ENSG00000165115 | 125.0374168 | 65.31194998 | 0.938856889  | 0.008446378 | 0.022721613 | KIF27      |
| ENSG00000271425 | 95.64646101 | 165.8245599 | -0.795121428 | 0.008478983 | 0.022806963 | NBPF10     |
| ENSG00000067601 | 66.93565529 | 31.08223101 | 1.108476858  | 0.008482159 | 0.022813145 | PMS2P4     |
| ENSG00000249502 | 17.61654616 | 3.159256312 | 2.46450916   | 0.00849719  | 0.022851206 | AC006160.1 |
| ENSG00000215458 | 19.83514171 | 4.616093944 | 2.097747247  | 0.008505987 | 0.022872496 | AATBC      |
| ENSG00000196586 | 1271.654382 | 875.1763775 | 0.53895023   | 0.008508935 | 0.022878054 | MYO6       |
| novel.710       | 6.012206566 | 0           | 4.92258688   | 0.008529255 | 0.022930317 | -          |
| ENSG00000092203 | 1005.200587 | 1357.512264 | -0.433509361 | 0.008531367 | 0.02293362  | TOX4       |
| ENSG00000228314 | 971.7851179 | 40.53119776 | 4.584282706  | 0.008536871 | 0.022946043 | CYP4F29P   |
| ENSG00000187715 | 13.96412779 | 0.774441189 | 4.23418577   | 0.008555796 | 0.022994531 | KBTD12     |
| ENSG00000147003 | 11.16489151 | 1.386017859 | 2.979518094  | 0.008557951 | 0.022996132 | CLTRN      |
| ENSG00000287511 | 0.907445357 | 9.04912588  | -3.315011895 | 0.008558162 | 0.022996132 | AL109984.1 |
| ENSG00000023909 | 337.6955339 | 656.0165736 | -0.958138915 | 0.008575836 | 0.02304124  | GCLM       |
| ENSG00000275318 | 25.3074654  | 5.901766323 | 2.084390275  | 0.008584097 | 0.023061052 | AL136981.2 |
| ENSG00000099783 | 3719.246738 | 6120.884838 | -0.718787761 | 0.008589876 | 0.023074191 | HNRNPM     |
| novel.756       | 12.35540599 | 0           | 5.960969473  | 0.008590799 | 0.023074283 | -          |
| ENSG00000169006 | 5.787019107 | 0           | 4.865696279  | 0.008609257 | 0.023121472 | NTSR2      |
| ENSG00000160345 | 32.10648161 | 66.4664669  | -1.048459673 | 0.008610164 | 0.023121516 | C9orf116   |
| ENSG00000258234 | 7.989317219 | 0           | 5.333648608  | 0.008615983 | 0.023134751 | AC024257.1 |
| ENSG00000198105 | 483.9184631 | 273.1948987 | 0.825461824  | 0.00862038  | 0.023144165 | ZNF248     |
| ENSG00000228852 | 31.08452659 | 7.998422062 | 1.964052249  | 0.008627479 | 0.023160832 | AC092802.2 |
| ENSG00000226352 | 18.70383381 | 3.678659843 | 2.361616077  | 0.008630039 | 0.023165128 | PSPC1-AS2  |
| ENSG00000154451 | 247.362866  | 61.18761325 | 2.017462897  | 0.008630863 | 0.023165128 | GBP5       |
| ENSG00000064989 | 245.024789  | 62.10147627 | 1.978023258  | 0.008637184 | 0.023179701 | CALCRL     |
| ENSG00000230730 | 5.763057239 | 0           | 4.86029903   | 0.008640378 | 0.023185878 | AC074011.1 |
| ENSG00000215452 | 5.756788995 | 0           | 4.858893229  | 0.008648554 | 0.023205419 | ZNF663P    |
| ENSG00000158805 | 683.9656889 | 394.5743413 | 0.793170065  | 0.008656096 | 0.023223258 | ZNF276     |
| novel.632       | 10.45874302 | 0.387220594 | 4.759732503  | 0.008673768 | 0.023267926 | -          |
| ENSG00000104047 | 860.7830945 | 1840.045824 | -1.095821207 | 0.008674536 | 0.023267926 | DTWD1      |
| ENSG00000100348 | 965.8299832 | 1534.94595  | -0.668548054 | 0.008677521 | 0.023272551 | TXN2       |
| ENSG00000133800 | 87.67429613 | 11.99720714 | 2.862487698  | 0.008678052 | 0.023272551 | LYVE1      |
| ENSG00000225783 | 41.17613405 | 14.817425   | 1.476302526  | 0.008682679 | 0.023282556 | MIAT       |

|                 |             |             |              |             |             |            |
|-----------------|-------------|-------------|--------------|-------------|-------------|------------|
| ENSG00000248593 | 104.2302091 | 52.89928081 | 0.980618777  | 0.008692661 | 0.023306917 | DSTNP2     |
| ENSG00000268621 | 5.71771207  | 0           | 4.85006095   | 0.008699179 | 0.023321987 | IGFL2-AS1  |
| ENSG00000269976 | 18.72138489 | 3.362259022 | 2.501010905  | 0.0087038   | 0.023331968 | AC012065.3 |
| ENSG00000127124 | 251.5462933 | 586.7999598 | -1.221709805 | 0.008710159 | 0.023346604 | HIVEP3     |
| ENSG00000197646 | 62.47629762 | 161.3367493 | -1.367455793 | 0.008721481 | 0.023374542 | PDCD1LG2   |
| ENSG00000068976 | 105.8554414 | 18.48102443 | 2.511832371  | 0.008728476 | 0.023390875 | PYGM       |
| ENSG00000067560 | 9254.769892 | 14220.24918 | -0.619689933 | 0.008729917 | 0.023392324 | RHOA       |
| ENSG00000139505 | 651.8612992 | 937.1007339 | -0.523699563 | 0.008743542 | 0.023426417 | MTMR6      |
| ENSG00000286685 | 6.704564926 | 0           | 5.078172125  | 0.008763578 | 0.023477678 | AL158077.2 |
| ENSG00000135373 | 2.775203133 | 220.9168483 | -6.316617745 | 0.008766185 | 0.023482239 | EHF        |
| ENSG00000167797 | 1323.991164 | 847.5079875 | 0.643661137  | 0.008767168 | 0.023482453 | CDK2AP2    |
| ENSG00000231625 | 10.00955048 | 1.130980201 | 3.191229918  | 0.008775101 | 0.023501278 | SLC47A1P2  |
| ENSG00000287958 | 6.584826854 | 0           | 5.054167423  | 0.008780774 | 0.023514046 | AC092053.5 |
| ENSG00000156853 | 265.7454243 | 175.9737276 | 0.594693847  | 0.008784154 | 0.023520674 | ZNF689     |
| ENSG00000011566 | 1048.603283 | 654.3117273 | 0.680166248  | 0.008786384 | 0.023524222 | MAP4K3     |
| ENSG00000064313 | 505.7386792 | 762.5753676 | -0.592225029 | 0.008790613 | 0.023533118 | TAF2       |
| ENSG00000270659 | 28.13915435 | 5.158006716 | 2.430447408  | 0.008795634 | 0.023544134 | AC079610.2 |
| ENSG00000231613 | 6.272710004 | 0           | 4.984485175  | 0.008815671 | 0.023594328 | AC099568.1 |
| ENSG00000219201 | 220.1785123 | 427.9523308 | -0.959245351 | 0.008816202 | 0.023594328 | AC138392.1 |
| ENSG00000235531 | 79.09513466 | 291.4808703 | -1.881954966 | 0.008836979 | 0.023647497 | MSC-AS1    |
| ENSG00000105538 | 153.1614832 | 439.1151684 | -1.51929938  | 0.008846754 | 0.023671217 | RASIP1     |
| ENSG00000125304 | 2282.356124 | 3428.294794 | -0.586976066 | 0.008848599 | 0.023673716 | TM9SF2     |
| ENSG00000282386 | 5.452194037 | 19.31182009 | -1.820590819 | 0.008856986 | 0.023692734 | AL358472.4 |
| ENSG00000240401 | 16.96444711 | 4.290236513 | 1.980372968  | 0.008857531 | 0.023692734 | AC012358.3 |
| ENSG00000096093 | 768.2026689 | 448.6960863 | 0.77577419   | 0.008865496 | 0.023711597 | EFHC1      |
| ENSG00000100603 | 915.4917542 | 1249.024255 | -0.448288628 | 0.008868557 | 0.023717342 | SNW1       |
| ENSG00000187109 | 5887.856948 | 8982.688434 | -0.609420395 | 0.008888844 | 0.02376915  | NAP1L1     |
| ENSG00000168734 | 824.8955621 | 521.1139959 | 0.662882041  | 0.008891067 | 0.023772647 | PKIG       |
| ENSG00000136457 | 3.65116473  | 15.33695692 | -2.075705762 | 0.00889926  | 0.023792104 | CHAD       |
| ENSG00000228393 | 84.78720464 | 38.93541751 | 1.126556183  | 0.008908808 | 0.023815182 | LINC01004  |
| ENSG00000120314 | 456.3035933 | 729.8327958 | -0.677286717 | 0.00891108  | 0.023818803 | WDR55      |
| ENSG00000159763 | 0.601596751 | 15.61895175 | -4.691623362 | 0.008914904 | 0.023826572 | PIP        |
| ENSG00000237039 | 11.24039552 | 45.4830381  | -2.017695534 | 0.008919142 | 0.023835449 | AC018738.1 |
| ENSG00000198743 | 1151.540587 | 514.1003843 | 1.163045895  | 0.008926999 | 0.023853993 | SLC5A3     |
| ENSG00000269954 | 0.616711807 | 11.92137868 | -4.283740016 | 0.008928726 | 0.023856153 | AC022239.1 |
| ENSG00000275340 | 6.114251013 | 0           | 4.944670534  | 0.00893004  | 0.02385721  | FGD5P1     |
| ENSG00000287336 | 11.76022002 | 0.774441189 | 3.992317561  | 0.008932955 | 0.023862545 | AL137157.1 |
| ENSG00000198650 | 6.107982769 | 0           | 4.943325334  | 0.008939663 | 0.023878007 | TAT        |
| novel.958       | 1165.564706 | 192.3476469 | 2.599583231  | 0.008941115 | 0.023879433 | -          |
| ENSG00000172731 | 160.0096771 | 320.7045559 | -1.004137906 | 0.008949093 | 0.023898281 | LRRC20     |
| novel.336       | 52.49139319 | 16.55065365 | 1.660232809  | 0.008951036 | 0.023901015 | -          |
| ENSG00000147592 | 115.9514944 | 276.8040355 | -1.256480662 | 0.008953009 | 0.023903646 | LACTB2     |
| ENSG00000125775 | 63.49964883 | 31.6631261  | 1.004297278  | 0.008953862 | 0.023903646 | SDCBP2     |
| ENSG00000215114 | 483.2848399 | 173.2303314 | 1.478903182  | 0.008956126 | 0.023907234 | UBXN2B     |
| ENSG00000186960 | 0           | 6.73513053  | -5.328250729 | 0.008959323 | 0.023913312 | LINC01551  |
| ENSG00000136158 | 1731.446466 | 963.66955   | 0.845691426  | 0.008970161 | 0.023939779 | SPRY2      |
| ENSG00000267370 | 24.40886685 | 7.836713419 | 1.635534343  | 0.008985566 | 0.02397843  | AC008752.3 |
| ENSG00000275591 | 0           | 5.73646166  | -5.101657879 | 0.008989542 | 0.023986577 | XKR5       |
| novel.87        | 6.062637601 | 0           | 4.933526287  | 0.009009353 | 0.024036968 | -          |
| ENSG00000254695 | 6.553343093 | 0           | 5.047794071  | 0.009013523 | 0.024045625 | AC087379.2 |
| ENSG00000152133 | 429.6020502 | 288.1501101 | 0.576259471  | 0.009020621 | 0.024062091 | GPATCH11   |

|                 |             |             |              |             |             |             |
|-----------------|-------------|-------------|--------------|-------------|-------------|-------------|
| ENSG00000170638 | 777.2197936 | 1251.274901 | -0.686734248 | 0.009031396 | 0.024088357 | TRABD       |
| novel.833       | 7.014103207 | 0           | 5.143272555  | 0.009043264 | 0.024117537 | -           |
| ENSG00000124215 | 26.11043028 | 6.827303669 | 1.936938656  | 0.009056152 | 0.024149428 | CDH26       |
| ENSG00000182871 | 5503.589753 | 2362.646985 | 1.219899294  | 0.009064282 | 0.024168627 | COL18A1     |
| ENSG00000198763 | 48953.40371 | 31678.5131  | 0.627906806  | 0.009068753 | 0.024178067 | MT-ND2      |
| ENSG00000105726 | 1179.20478  | 1694.778086 | -0.523233439 | 0.009078961 | 0.024202801 | ATP13A1     |
| ENSG00000179562 | 387.2458578 | 565.8742894 | -0.547465098 | 0.009080909 | 0.02420551  | GCC1        |
| ENSG00000250995 | 16.27724588 | 3.557089392 | 2.189035655  | 0.009082719 | 0.024207849 | AL391280.1  |
| ENSG00000276404 | 0.894837599 | 9.099876557 | -3.329562819 | 0.009086185 | 0.024214603 | MIR6835     |
| ENSG00000117643 | 627.5623634 | 101.4590811 | 2.627902177  | 0.00909802  | 0.024243658 | MAN1C1      |
| ENSG00000124479 | 119.2599134 | 16.63884559 | 2.846854975  | 0.009099479 | 0.024245058 | NDP         |
| ENSG00000279863 | 19.91329556 | 5.727005049 | 1.796779307  | 0.00910514  | 0.024257655 | AC069547.1  |
| ENSG00000272338 | 26.30191142 | 6.247564456 | 2.085613874  | 0.009107546 | 0.024261576 | AC067838.1  |
| ENSG00000225171 | 13.64656906 | 0.713078025 | 4.253385958  | 0.009109471 | 0.024264216 | DUTP6       |
| ENSG00000264743 | 15.0034917  | 1.762625967 | 3.077367727  | 0.009115441 | 0.024277629 | DPRXP4      |
| ENSG00000077380 | 1892.517686 | 2612.386155 | -0.46508021  | 0.009121816 | 0.024292118 | DYNC112     |
| ENSG00000249700 | 47.35661533 | 21.97174197 | 1.110602441  | 0.009123891 | 0.024295153 | SRD5A3-AS1  |
| ENSG00000115541 | 561.9418952 | 907.5563327 | -0.691740159 | 0.009136521 | 0.024321689 | HSPE1       |
| ENSG00000126262 | 7.743928837 | 0           | 5.288153953  | 0.009137183 | 0.024321689 | FFAR2       |
| ENSG00000146216 | 7.53761738  | 0.336469917 | 4.286754675  | 0.009137482 | 0.024321689 | TTBK1       |
| ENSG00000197933 | 124.0768196 | 48.22696078 | 1.360629328  | 0.009138468 | 0.024321689 | ZNF823      |
| ENSG00000265702 | 25.63226128 | 5.981914313 | 2.119572121  | 0.009138537 | 0.024321689 | AC005821.1  |
| ENSG00000243742 | 4.625338556 | 55.50331493 | -3.587799145 | 0.009141816 | 0.024327925 | RPLP0P2     |
| ENSG00000267002 | 255.6369499 | 148.1802389 | 0.788067468  | 0.009152551 | 0.024353998 | AC060780.1  |
| ENSG00000100796 | 1347.949756 | 971.859279  | 0.471997436  | 0.009170484 | 0.024399216 | PPP4R3A     |
| ENSG00000115762 | 1623.39241  | 2743.431215 | -0.757038628 | 0.009179286 | 0.024420135 | PLEKHB2     |
| ENSG00000134253 | 210.6488549 | 128.1909027 | 0.716351444  | 0.009183767 | 0.024429553 | TRIM45      |
| ENSG00000155111 | 825.2582254 | 485.3447096 | 0.766318864  | 0.009189166 | 0.024441414 | CDK19       |
| ENSG00000173559 | 1165.405945 | 2225.529684 | -0.933274848 | 0.009215909 | 0.024510034 | NABP1       |
| ENSG00000281026 | 79.0664158  | 32.23212444 | 1.297535513  | 0.009259561 | 0.024623609 | N4BP2L2-IT2 |
| ENSG00000223776 | 0           | 5.310258749 | -4.992165344 | 0.009289082 | 0.024699586 | LGALS8-AS1  |
| ENSG00000033178 | 782.5305117 | 1376.010926 | -0.814022515 | 0.009293271 | 0.024708193 | UBA6        |
| ENSG00000272784 | 17.17863646 | 1.874739808 | 3.221375395  | 0.009298767 | 0.024720276 | AC019193.2  |
| ENSG00000124733 | 846.5445268 | 1299.532581 | -0.618596209 | 0.009309086 | 0.024742928 | MEA1        |
| ENSG00000158234 | 305.8478199 | 148.8565649 | 1.037444654  | 0.009309192 | 0.024742928 | FAIM        |
| ENSG00000245468 | 19.51299567 | 3.984448178 | 2.298571997  | 0.009329334 | 0.024793142 | LINC02447   |
| ENSG00000120156 | 182.6353512 | 391.9343598 | -1.102274427 | 0.009330157 | 0.024793142 | TEK         |
| ENSG00000259298 | 19.72808267 | 3.537020296 | 2.473394553  | 0.009330947 | 0.024793142 | AC012170.2  |
| novel.1111      | 8.742135802 | 0.356539013 | 4.500461782  | 0.009348959 | 0.024837714 | -           |
| novel.369       | 5.466055445 | 0           | 4.783771155  | 0.009349634 | 0.024837714 | -           |
| ENSG00000272568 | 7.043079671 | 0           | 5.148838622  | 0.009357633 | 0.024856422 | AC005162.3  |
| ENSG00000121406 | 176.5264426 | 112.2235843 | 0.653497606  | 0.0093605   | 0.024859649 | ZNF549      |
| ENSG00000105245 | 714.1705475 | 1035.312963 | -0.535587213 | 0.009360761 | 0.024859649 | NUMBL       |
| ENSG00000125676 | 962.8989584 | 1415.040198 | -0.555229439 | 0.009365782 | 0.024870439 | THOC2       |
| ENSG00000258274 | 5.453447686 | 0           | 4.780794603  | 0.009366821 | 0.024870656 | AC012085.2  |
| ENSG00000260468 | 5.450940389 | 0           | 4.780205744  | 0.009370256 | 0.024876651 | LINC01290   |
| ENSG00000279812 | 2.450478525 | 14.93899545 | -2.612305286 | 0.009370994 | 0.024876651 | AC120057.4  |
| novel.438       | 236.1802812 | 674.4129148 | -1.513947673 | 0.009372467 | 0.024877806 | -           |
| ENSG00000259871 | 7.228007828 | 0.356539013 | 4.226512757  | 0.009373344 | 0.024877806 | AC130456.1  |
| ENSG00000118894 | 99.50895179 | 205.33806   | -1.046582034 | 0.009386189 | 0.024904679 | EEF2KMT     |
| novel.490       | 43.68603296 | 9.995888197 | 2.136262051  | 0.009386258 | 0.024904679 | -           |



|                  |              |             |              |             |             |            |
|------------------|--------------|-------------|--------------|-------------|-------------|------------|
| ENSG00000272953  | 37.41805282  | 11.3843462  | 1.712744648  | 0.009386345 | 0.024904679 | AC092171.4 |
| ENSG00000133874  | 165.131705   | 86.35314592 | 0.938040352  | 0.009388002 | 0.024906533 | RNF122     |
| ENSG00000147118  | 225.0753524  | 121.809871  | 0.88561495   | 0.009392872 | 0.024916294 | ZNF182     |
| ENSG00000246308  | 25.86281934  | 6.737570675 | 1.934162493  | 0.009393599 | 0.024916294 | AC116535.1 |
| ENSG00000131748  | 1649.171954  | 1055.073414 | 0.644558568  | 0.009394917 | 0.024917245 | STARD3     |
| ENSG00000168994  | 1391.340526  | 855.9680113 | 0.700608845  | 0.009416454 | 0.024971818 | PXDC1      |
| ENSG00000260917  | 202.8618465  | 118.8841706 | 0.772599466  | 0.009418098 | 0.024973628 | AL158212.3 |
| ENSG00000255455  | 250.6642926  | 112.6634349 | 1.155460705  | 0.00942318  | 0.024984555 | AP003486.1 |
| ENSG00000138767  | 609.2158563  | 381.5297096 | 0.675860613  | 0.009427436 | 0.024993286 | CNOT6L     |
| ENSG00000251003  | 33.84002699  | 173.5773541 | -2.359472307 | 0.009445988 | 0.025039915 | ZFPM2-AS1  |
| ENSG00000011590  | 13.25916167  | 2.51699806  | 2.399588473  | 0.009450183 | 0.02504848  | ZBTB32     |
| novel.309        | 5.980722805  | 0           | 4.915670547  | 0.00945886  | 0.025068921 | -          |
| ENSG00000221968  | 4151.908727  | 1814.120902 | 1.194592418  | 0.00946468  | 0.025081788 | FADS3      |
| ENSG00000115350  | 298.6317631  | 528.9631796 | -0.8253562   | 0.009470375 | 0.02509432  | POLE4      |
| ENSG00000160055  | 178.7299944  | 300.8134633 | -0.751457418 | 0.009478821 | 0.025112442 | TMEM234    |
| ENSG00000114902  | 1073.943168  | 1749.189733 | -0.703951135 | 0.009479147 | 0.025112442 | SPCS1      |
| ENSG00000214548  | 6673.24534   | 11359.33352 | -0.767386152 | 0.009489993 | 0.025138613 | MEG3       |
| ENSG00000285554  | 16.83976571  | 3.250145181 | 2.377875592  | 0.00950272  | 0.025169758 | AC242988.2 |
| ENSG00000172006  | 141.2204248  | 81.90633784 | 0.78545371   | 0.009506334 | 0.025176765 | ZNF554     |
| ENSG00000259520  | 2.06654734   | 17.67906531 | -3.080908151 | 0.009517027 | 0.025202515 | AC051619.5 |
| ENSG00000235438  | 17.59480686  | 1.00940975  | 4.081681856  | 0.009524811 | 0.025220558 | ESRRAP2    |
| ENSG00000253593  | 1.524157165  | 12.67575078 | -3.054381467 | 0.009526331 | 0.025222013 | AC110741.1 |
| ENSG00000245060  | 117.7523102  | 62.1800832  | 0.91832453   | 0.00952741  | 0.025222299 | LINC00847  |
| ENSG00000267809  | 17.2639562   | 52.17661778 | -1.593796507 | 0.009546048 | 0.025269064 | NDUFV2P1   |
| ENSG00000164089  | 12.30038763  | 0           | 5.953784591  | 0.009547546 | 0.025270455 | ETNPPL     |
| ENSG00000155304  | 968.4743792  | 1497.895307 | -0.629006142 | 0.009549298 | 0.025272518 | HSPA13     |
| ENSG00000273265  | 10.29652308  | 0.713078025 | 3.844641831  | 0.009557697 | 0.02528977  | CNNM3-DT   |
| ENSG00000236871  | 55.42534005  | 106.4833982 | -0.939877876 | 0.009557763 | 0.02528977  | LINC00106  |
| ENSG00000015133  | 79.711191774 | 21.3402246  | 1.899006884  | 0.009559733 | 0.025292407 | CCDC88C    |
| ENSG00000157578  | 22.07805513  | 48.12391837 | -1.123482643 | 0.009571776 | 0.025321689 | LCA5L      |
| ENSG00000143341  | 146.1128466  | 32.18163055 | 2.181080117  | 0.009577066 | 0.025333106 | HMCN1      |
| ENSG00000286507  | 7.632139934  | 0.387220594 | 4.302694923  | 0.009592138 | 0.02537039  | AC004947.3 |
| ENSG00000235245  | 49.49239844  | 21.45105417 | 1.212218466  | 0.009598221 | 0.025383895 | AL360181.2 |
| ENSG00000286835  | 14.47113071  | 3.240688571 | 2.162336109  | 0.009605946 | 0.02540174  | AL133477.2 |
| ENSG00000278811  | 3.944405577  | 20.85826233 | -2.398534901 | 0.009616115 | 0.025426043 | LINC00624  |
| ENSG00000117481  | 280.0750776  | 417.0953508 | -0.574595993 | 0.009623855 | 0.025443917 | NSUN4      |
| ENSG00000287569  | 28.63773774  | 5.483864147 | 2.365731493  | 0.009641172 | 0.025487108 | AL078587.2 |
| ENSG00000215190  | 185.629445   | 85.2359075  | 1.120481481  | 0.009653363 | 0.025516739 | LINC00680  |
| ENSG00000137193  | 286.3705943  | 648.8371663 | -1.17980658  | 0.009659537 | 0.025528649 | PIM1       |
| ENSG00000127328  | 151.3744585  | 72.58937846 | 1.058609     | 0.009659834 | 0.025528649 | RAB3IP     |
| ENSG00000226329  | 43.54294593  | 12.56363693 | 1.803373913  | 0.009662036 | 0.025530207 | AC005682.1 |
| ENSG00000025796  | 1556.799985  | 2321.178324 | -0.576338678 | 0.009662389 | 0.025530207 | SEC63      |
| ENSG00000178074  | 279.2428085  | 410.8851805 | -0.557127249 | 0.009682766 | 0.025581415 | C2orf69    |
| ENSG00000137944  | 954.5939924  | 589.3786034 | 0.69608098   | 0.009683739 | 0.025581415 | KYAT3      |
| novel.1078       | 10.14433233  | 0.387220594 | 4.713203061  | 0.009691006 | 0.02559801  | -          |
| ENSG000000101670 | 31.7311125   | 7.408198758 | 2.092618871  | 0.009698781 | 0.025615943 | LIPG       |
| ENSG00000137875  | 0            | 6.381031662 | -5.256282798 | 0.009701678 | 0.02562099  | BCL2L10    |
| ENSG00000147684  | 979.2976785  | 1429.058016 | -0.545299116 | 0.009707439 | 0.025633599 | NDUFB9     |
| ENSG00000111834  | 21.75304579  | 2.475703993 | 3.128184872  | 0.009709221 | 0.025635697 | RSPH4A     |
| ENSG00000186453  | 18.51758074  | 5.02453951  | 1.881423317  | 0.009712631 | 0.025642096 | FAM228A    |
| ENSG00000256683  | 194.716036   | 109.9133946 | 0.824299735  | 0.009722166 | 0.025664662 | ZNF350     |

|                 |             |             |              |             |             |            |
|-----------------|-------------|-------------|--------------|-------------|-------------|------------|
| ENSG00000277702 | 17.52488691 | 108.7642718 | -2.635058665 | 0.009732421 | 0.025687857 | AC239859.6 |
| ENSG00000107020 | 242.2291725 | 369.1449907 | -0.608213819 | 0.009732931 | 0.025687857 | PLGRKT     |
| ENSG00000118655 | 185.4174348 | 316.7711496 | -0.773214345 | 0.00973476  | 0.025690077 | DCLRE1B    |
| ENSG00000273447 | 11.74879464 | 1.41669944  | 3.042023246  | 0.009736184 | 0.025691224 | AC004067.1 |
| ENSG00000224479 | 7.507387268 | 0.336469917 | 4.28161068   | 0.009743307 | 0.02570741  | AC104162.1 |
| ENSG00000255320 | 17.05646236 | 41.33572541 | -1.281133946 | 0.009744518 | 0.025707995 | AP000759.1 |
| ENSG00000187742 | 1227.646192 | 777.9558494 | 0.65846624   | 0.009748026 | 0.025714638 | SECISBP2   |
| ENSG00000258429 | 51.84494947 | 114.3232409 | -1.143114074 | 0.009750839 | 0.025717624 | PDF        |
| ENSG00000263293 | 6.070159493 | 36.52899223 | -2.586843186 | 0.009751342 | 0.025717624 | AC068234.2 |
| ENSG00000168890 | 422.7778894 | 268.9094609 | 0.651762792  | 0.009752128 | 0.025717624 | TMEM150A   |
| ENSG00000217825 | 0           | 10.98394458 | -6.03593705  | 0.009761533 | 0.025739814 | AC099552.1 |
| ENSG00000251768 | 8.803849676 | 0.693008929 | 3.630021057  | 0.00976313  | 0.025741412 | RNA5SP217  |
| ENSG00000178694 | 262.9784985 | 167.9661058 | 0.646070186  | 0.009780455 | 0.025783477 | NSUN3      |
| ENSG00000110218 | 503.4191076 | 1290.010557 | -1.357364737 | 0.009781724 | 0.025783477 | PANX1      |
| ENSG00000155903 | 828.8453827 | 503.8048942 | 0.718516739  | 0.009782061 | 0.025783477 | RASA2      |
| ENSG00000100024 | 26.23407149 | 5.787212337 | 2.182803181  | 0.009786587 | 0.025792789 | UPB1       |
| ENSG00000120896 | 3128.830728 | 1790.872811 | 0.804884047  | 0.009789351 | 0.025797458 | SORBS3     |
| ENSG00000135913 | 68.73110053 | 137.2103273 | -0.99569824  | 0.009793063 | 0.025804622 | USP37      |
| ENSG00000252147 | 6.115504662 | 0           | 4.944986835  | 0.009800426 | 0.025821403 | RNY3P16    |
| ENSG00000205476 | 131.2533837 | 258.8204065 | -0.979725674 | 0.00980621  | 0.025834024 | CCDC85C    |
| ENSG00000105983 | 472.4189593 | 711.4421463 | -0.590873876 | 0.009807887 | 0.025835822 | LMBR1      |
| ENSG00000166181 | 1467.395166 | 1975.933871 | -0.429346753 | 0.009813003 | 0.025846679 | API5       |
| ENSG00000131323 | 633.464852  | 1079.45849  | -0.768788969 | 0.009821632 | 0.025866784 | TRAF3      |
| ENSG00000143632 | 7.95937184  | 0.336469917 | 4.362991402  | 0.009832415 | 0.025892558 | ACTA1      |
| ENSG00000072364 | 1685.315052 | 2511.169534 | -0.575240426 | 0.009840803 | 0.025912021 | AFF4       |
| ENSG00000175745 | 6959.605462 | 2468.761381 | 1.495131714  | 0.009848116 | 0.025928649 | NR2F1      |
| ENSG00000235903 | 14.6374676  | 2.120320855 | 2.776086878  | 0.009851855 | 0.025935863 | CPB2-AS1   |
| ENSG00000104872 | 809.7121446 | 1294.237136 | -0.676328694 | 0.009853988 | 0.025938852 | PIH1D1     |
| ENSG00000281207 | 13.60025498 | 32.7245708  | -1.26859934  | 0.009868911 | 0.025975501 | SLFN1-AS1  |
| ENSG00000107897 | 868.9476198 | 555.4395649 | 0.645505853  | 0.009878574 | 0.025998301 | ACBD5      |
| ENSG00000272970 | 18.60171809 | 3.486269618 | 2.40008318   | 0.009884233 | 0.026010561 | AC107294.2 |
| ENSG00000149596 | 18.48226476 | 102.0752216 | -2.46445096  | 0.009897082 | 0.026041733 | JPH2       |
| ENSG00000251151 | 0.616711807 | 13.07743666 | -4.423755608 | 0.009944695 | 0.026164367 | HOXC-AS3   |
| ENSG00000100003 | 293.4144891 | 900.9422764 | -1.618133153 | 0.009946229 | 0.026165752 | SEC14L2    |
| ENSG00000178950 | 1636.943093 | 2551.142968 | -0.640000228 | 0.009959247 | 0.026197348 | GAK        |
| ENSG00000116652 | 19.18193155 | 4.371668772 | 2.14417846   | 0.009964047 | 0.026207319 | DLEU2L     |
| ENSG00000237115 | 5.423217574 | 0           | 4.773630415  | 0.009965265 | 0.026207871 | AL139805.1 |
| ENSG00000166250 | 493.6407511 | 2431.759414 | -2.300537989 | 0.009990412 | 0.026270055 | CLMP       |
| ENSG00000198838 | 81.56413389 | 32.99266109 | 1.300235092  | 0.009990932 | 0.026270055 | RYR3       |
| ENSG00000248174 | 63.4624819  | 8.918098818 | 2.830680387  | 0.010012171 | 0.026322156 | LINC02268  |
| ENSG00000174529 | 45.5004964  | 21.01436717 | 1.110255836  | 0.010012773 | 0.026322156 | TMEM81     |
| ENSG00000232352 | 24.53738047 | 8.060941101 | 1.618113055  | 0.010013857 | 0.026322341 | SEMA3B-AS1 |
| ENSG00000137502 | 429.888224  | 192.8027929 | 1.155522778  | 0.010023441 | 0.026344868 | RAB30      |
| ENSG00000134955 | 748.9378084 | 248.6896256 | 1.591189584  | 0.010028085 | 0.026353129 | SLC37A2    |
| ENSG00000231177 | 28.4512712  | 7.285344037 | 1.973183721  | 0.010028613 | 0.026353129 | LINC00852  |
| ENSG00000105662 | 478.3232954 | 284.2065364 | 0.750165798  | 0.010037594 | 0.026374063 | CRTC1      |
| ENSG00000267990 | 5.979469157 | 0           | 4.915356426  | 0.010051808 | 0.026408739 | AC063977.2 |
| ENSG00000185739 | 11.57396694 | 1.130980201 | 3.394994896  | 0.010057375 | 0.026420693 | SRL        |
| ENSG00000104517 | 1334.380743 | 2177.11847  | -0.706111491 | 0.010060031 | 0.026424998 | UBR5       |
| ENSG00000141551 | 2581.798578 | 3796.218546 | -0.556090133 | 0.01006377  | 0.026430918 | CSNK1D     |
| ENSG00000149506 | 9.854852431 | 80.63966022 | -3.033845538 | 0.010064319 | 0.026430918 | ZP1        |

|                 |             |             |              |             |             |              |
|-----------------|-------------|-------------|--------------|-------------|-------------|--------------|
| ENSG00000139292 | 10.03476599 | 1.049547942 | 3.232325191  | 0.01007546  | 0.026457503 | LGR5         |
| ENSG00000233247 | 18.8335298  | 46.95536851 | -1.322172024 | 0.010082106 | 0.026472278 | AC002524.1   |
| ENSG00000131378 | 854.894995  | 1309.781486 | -0.6157726   | 0.010085944 | 0.026479681 | RFTN1        |
| ENSG00000140265 | 448.0519061 | 290.8827783 | 0.623904791  | 0.010091446 | 0.026491449 | ZSCAN29      |
| ENSG00000218416 | 29.34582406 | 2.832243005 | 3.367921953  | 0.010094918 | 0.026497884 | AC110619.1   |
| ENSG00000230102 | 11.99167572 | 1.365948763 | 3.095496719  | 0.010106969 | 0.026526838 | LINC02028    |
| ENSG00000138641 | 12.05722181 | 1.854670712 | 2.728053021  | 0.010115687 | 0.026547037 | HERC3        |
| ENSG00000259205 | 20.04904633 | 1.936102971 | 3.413814278  | 0.010136365 | 0.026598617 | PRKXP1       |
| ENSG00000163634 | 653.4932277 | 982.3800589 | -0.588351479 | 0.010147323 | 0.026622179 | THOC7        |
| ENSG00000143443 | 128.6088458 | 75.41293555 | 0.771465732  | 0.010147394 | 0.026622179 | C1orf56      |
| ENSG00000227373 | 5.439586279 | 0           | 4.777509721  | 0.010158024 | 0.026647376 | AL121983.2   |
| ENSG00000135960 | 7.375397443 | 0           | 5.215171836  | 0.010163284 | 0.026658294 | EDAR         |
| ENSG00000214955 | 5.435825332 | 0           | 4.776621393  | 0.010164238 | 0.026658294 | AP000317.1   |
| ENSG00000262410 | 14.9027009  | 1.406086955 | 3.392295512  | 0.010177331 | 0.026689941 | AC024361.1   |
| ENSG00000177469 | 10845.64482 | 18035.35077 | -0.733732932 | 0.010184367 | 0.026705252 | CAVIN1       |
| ENSG00000172940 | 0.293240848 | 6.816691183 | -4.388705843 | 0.010185226 | 0.026705252 | SLC22A13     |
| ENSG00000143493 | 170.0140708 | 328.4788787 | -0.951144818 | 0.010191809 | 0.026719816 | INTS7        |
| ENSG00000166960 | 7.029218263 | 0           | 5.14621271   | 0.010204142 | 0.026748767 | CCDC178      |
| ENSG00000173889 | 1230.406779 | 780.6195294 | 0.656591809  | 0.010204911 | 0.026748767 | PHC3         |
| ENSG00000105877 | 6.330662931 | 26.10484616 | -2.038650988 | 0.01020813  | 0.026754507 | DNAH11       |
| ENSG00000235180 | 0.61420451  | 9.05858249  | -3.893877118 | 0.010214546 | 0.026768621 | LINC00601    |
| ENSG00000117461 | 277.9301474 | 105.3226824 | 1.397990954  | 0.010234434 | 0.026818036 | PIK3R3       |
| ENSG00000152463 | 18.79842729 | 328.4630948 | -4.127750901 | 0.010255692 | 0.026868801 | OLAH         |
| ENSG00000196562 | 900.4346028 | 170.9676003 | 2.396291995  | 0.010255875 | 0.026868801 | SULF2        |
| novel.142       | 4.546002329 | 17.04053148 | -1.909946422 | 0.010263014 | 0.026884792 | -            |
| ENSG00000174498 | 7.686260644 | 0           | 5.274789827  | 0.010268073 | 0.02689262  | IGDCC3       |
| ENSG00000245954 | 7.686260644 | 0           | 5.274789827  | 0.010268073 | 0.02689262  | LINC02273    |
| ENSG00000079150 | 335.7751222 | 727.5246954 | -1.115604591 | 0.010269849 | 0.026894561 | FKBP7        |
| ENSG00000271646 | 108.68857   | 36.86512382 | 1.555067577  | 0.010280256 | 0.026919102 | AC099343.3   |
| ENSG00000163993 | 0.909952655 | 15.3123115  | -4.078010563 | 0.01028403  | 0.026926272 | S100P        |
| ENSG00000164406 | 44.58524442 | 13.88243104 | 1.681332512  | 0.010309364 | 0.026989883 | LEAP2        |
| ENSG00000164506 | 605.8071739 | 998.5205969 | -0.721118058 | 0.010310586 | 0.02699036  | STXBPF5      |
| ENSG00000116793 | 314.631753  | 532.07228   | -0.758368609 | 0.010318484 | 0.027008316 | PHTF1        |
| ENSG00000106069 | 7.23685464  | 0.356539013 | 4.228017801  | 0.010353154 | 0.027096332 | CHN2         |
| novel.380       | 16.03024785 | 0.672939833 | 4.526657364  | 0.010355122 | 0.027098753 | -            |
| ENSG00000012211 | 125.6004348 | 209.7094592 | -0.738343803 | 0.010357606 | 0.027102523 | PRICKLE3     |
| ENSG00000284505 | 7.326291328 | 0.387220594 | 4.243630399  | 0.010363069 | 0.027114088 | LYNX1-SLURP2 |
| ENSG00000224367 | 5.454701335 | 0           | 4.781095046  | 0.010369201 | 0.027127399 | OACYLP       |
| ENSG00000117298 | 3785.888518 | 6298.352694 | -0.734278905 | 0.010376021 | 0.02714251  | ECE1         |
| ENSG00000167523 | 107.7219181 | 177.8556595 | -0.723161534 | 0.010380126 | 0.027150514 | SPATA33      |
| ENSG00000100558 | 50.95247663 | 156.6543307 | -1.61940436  | 0.010383195 | 0.027155806 | PLEK2        |
| ENSG00000184900 | 1550.182464 | 2260.719761 | -0.544453351 | 0.010384432 | 0.027156309 | SUMO3        |
| ENSG00000227719 | 9.654595755 | 0.672939833 | 3.780488325  | 0.010387115 | 0.027160591 | AC006042.1   |
| ENSG00000188846 | 7479.744721 | 11379.06928 | -0.605342412 | 0.010398092 | 0.027186559 | RPL14        |
| ENSG00000268529 | 7.616953607 | 0           | 5.262432305  | 0.01040843  | 0.027210848 | CYP2T3P      |
| ENSG00000248608 | 5.421963925 | 0           | 4.773319105  | 0.010426196 | 0.027248256 | AC133963.1   |
| ENSG00000285697 | 5.421963925 | 0           | 4.773319105  | 0.010426196 | 0.027248256 | AC002059.3   |
| ENSG00000067836 | 315.7551396 | 196.5413092 | 0.684923306  | 0.010426429 | 0.027248256 | ROGDI        |
| ENSG00000270035 | 6.554596742 | 0           | 5.047943845  | 0.010426934 | 0.027248256 | AL359881.2   |
| ENSG00000224843 | 15.17351826 | 3.311508345 | 2.212902182  | 0.010444168 | 0.027290548 | LINC00240    |
| ENSG00000196678 | 334.3740535 | 200.3567752 | 0.73793985   | 0.01044575  | 0.027291937 | ERI2         |

|                 |             |             |              |             |             |            |
|-----------------|-------------|-------------|--------------|-------------|-------------|------------|
| ENSG00000261584 | 6.382276343 | 0           | 5.007377559  | 0.010456724 | 0.027317862 | AL513548.1 |
| ENSG00000119541 | 735.9603055 | 1062.44745  | -0.529483339 | 0.010460133 | 0.027324021 | VPS4B      |
| ENSG00000134815 | 372.7822925 | 584.3396583 | -0.648825506 | 0.010461726 | 0.027325435 | DHX34      |
| ENSG00000281344 | 9.590303313 | 32.09878562 | -1.738375646 | 0.010466378 | 0.027334837 | HELLPAR    |
| ENSG00000226137 | 656.8621657 | 369.5108923 | 0.830712244  | 0.010471712 | 0.027346021 | BAIAP2-DT  |
| ENSG00000236914 | 38.49169252 | 11.25216326 | 1.765901955  | 0.010487601 | 0.027384761 | LINC01852  |
| ENSG00000167874 | 44.92995614 | 15.32737192 | 1.558031661  | 0.010502455 | 0.027418313 | TMEM88     |
| ENSG00000228013 | 15.72851619 | 2.844011366 | 2.46181066   | 0.010503476 | 0.027418313 | IL6R-AS1   |
| ENSG00000267041 | 60.07736123 | 27.2831566  | 1.138695634  | 0.010503617 | 0.027418313 | ZNF850     |
| ENSG00000266910 | 23.85261527 | 5.604150329 | 2.109726047  | 0.010508188 | 0.02742749  | AC008507.1 |
| ENSG00000213145 | 23.8818052  | 4.230029225 | 2.487939114  | 0.010529279 | 0.027479778 | CRIP1      |
| ENSG00000225205 | 102.3675806 | 21.80502464 | 2.236995856  | 0.01053155  | 0.027482944 | AC078883.1 |
| ENSG00000104442 | 507.5392653 | 798.2491411 | -0.653652848 | 0.010537348 | 0.027495313 | ARMC1      |
| ENSG00000083799 | 1798.287824 | 907.5870442 | 0.986832814  | 0.010547505 | 0.02751704  | CYLD       |
| ENSG00000231652 | 1.232169966 | 10.1293554  | -3.051260112 | 0.010547793 | 0.02751704  | AL590428.1 |
| ENSG00000267299 | 8.343018291 | 0.356539013 | 4.434546179  | 0.010556533 | 0.027537078 | AC011444.3 |
| ENSG00000071537 | 1973.966    | 3094.16785  | -0.648360416 | 0.010577088 | 0.027587925 | SEL1L      |
| ENSG00000229056 | 0           | 5.02453951  | -4.910064739 | 0.010586776 | 0.027610423 | HECW2-AS1  |
| ENSG00000128881 | 465.541548  | 252.6991984 | 0.882207476  | 0.010590762 | 0.027618045 | TTBK2      |
| ENSG00000257252 | 13.46575786 | 1.069617038 | 3.647008419  | 0.010616635 | 0.027682738 | AC124947.1 |
| ENSG00000100985 | 16.49706274 | 721.8196354 | -5.450656948 | 0.010629894 | 0.027714529 | MMP9       |
| ENSG00000125735 | 49.83287884 | 7.999449543 | 2.652809519  | 0.010638931 | 0.027735305 | TNFSF14    |
| ENSG00000204055 | 18.55407909 | 3.893559308 | 2.243810411  | 0.010678557 | 0.027835816 | AL158151.1 |
| ENSG00000165119 | 9071.440536 | 12683.56067 | -0.483581209 | 0.010693487 | 0.027871939 | HNRNPK     |
| ENSG00000169919 | 1348.859735 | 968.4366502 | 0.477945654  | 0.010696462 | 0.027876895 | GUSB       |
| ENSG00000280107 | 17.75974756 | 3.342189926 | 2.430844564  | 0.010704339 | 0.027894627 | AL022393.1 |
| ENSG00000136807 | 2024.503695 | 1228.993577 | 0.720178957  | 0.010717919 | 0.027927213 | CDK9       |
| novel.38        | 7.713698725 | 0           | 5.282747095  | 0.010722048 | 0.027933557 | -          |
| ENSG00000203326 | 128.570524  | 64.38435767 | 0.995862676  | 0.010722503 | 0.027933557 | ZNF525     |
| ENSG00000053371 | 683.1868389 | 1153.291806 | -0.755597025 | 0.010743584 | 0.027985668 | AKR7A2     |
| ENSG00000101460 | 872.0397569 | 486.4393235 | 0.842718231  | 0.010747727 | 0.027993653 | MAP1LC3A   |
| ENSG00000196072 | 976.5681766 | 578.7198053 | 0.754278814  | 0.010763279 | 0.028031351 | BLOC1S2    |
| ENSG00000143801 | 239.3973413 | 119.4859524 | 1.000337623  | 0.010767021 | 0.028038284 | PSEN2      |
| ENSG00000245532 | 11063.10148 | 24575.38551 | -1.151446848 | 0.010769147 | 0.028041012 | NEAT1      |
| ENSG00000106018 | 15.0943955  | 0.336469917 | 5.287184297  | 0.010776341 | 0.028056931 | VIPR2      |
| ENSG00000145107 | 0.615458159 | 11.3204145  | -4.208740731 | 0.010783787 | 0.028071738 | TM4SF19    |
| ENSG00000141519 | 119.2608972 | 47.69424783 | 1.322711759  | 0.010784189 | 0.028071738 | CCDC40     |
| ENSG00000198841 | 52.89344493 | 105.2076148 | -0.994308733 | 0.01084363  | 0.028223639 | KT112      |
| ENSG00000085377 | 792.1289759 | 1297.580083 | -0.711810316 | 0.010864292 | 0.028274583 | PREP       |
| ENSG00000127054 | 1607.472518 | 2335.330529 | -0.538748098 | 0.010871996 | 0.028291799 | INTS11     |
| ENSG00000231359 | 5.687481958 | 0           | 4.843060305  | 0.010886675 | 0.028325879 | AC072052.1 |
| ENSG00000110723 | 47.49844872 | 10.92514996 | 2.114570698  | 0.010887273 | 0.028325879 | EXPH5      |
| ENSG00000213300 | 98.46672458 | 159.7608754 | -0.699117368 | 0.010911216 | 0.02838533  | HNRNPA3P6  |
| ENSG00000232480 | 0           | 5.34094033  | -4.999364244 | 0.010921422 | 0.028407884 | TGFB2-AS1  |
| ENSG00000132600 | 563.7744517 | 924.6977697 | -0.71421995  | 0.010922072 | 0.028407884 | PRMT7      |
| ENSG00000148411 | 2305.526242 | 1351.052556 | 0.770777033  | 0.010942021 | 0.028456922 | NACC2      |
| novel.8         | 11.85341765 | 1.161661783 | 3.411296551  | 0.010955075 | 0.02848802  | -          |
| ENSG00000185860 | 0.308355904 | 11.99720714 | -5.206964998 | 0.010962158 | 0.028503586 | CCDC190    |
| ENSG00000225206 | 29.75052564 | 10.54854185 | 1.48450485   | 0.010975774 | 0.028536133 | MIR137HG   |
| ENSG00000104888 | 41.28834988 | 2.200597239 | 4.235963021  | 0.010981856 | 0.028549089 | SLC17A7    |
| ENSG00000144589 | 826.5372941 | 539.5724298 | 0.615581893  | 0.010987713 | 0.028561459 | STK11IP    |

|                 |             |             |              |             |             |             |
|-----------------|-------------|-------------|--------------|-------------|-------------|-------------|
| ENSG00000137959 | 3141.53916  | 1425.443706 | 1.139996063  | 0.011000243 | 0.028591168 | IFI44L      |
| ENSG00000263753 | 1029.068959 | 598.5031035 | 0.781374213  | 0.011021877 | 0.028644532 | LINC00667   |
| ENSG00000187676 | 162.9145053 | 281.9571151 | -0.792339834 | 0.011026019 | 0.02865243  | B3GLCT      |
| ENSG00000007520 | 1062.049108 | 1548.105016 | -0.543868039 | 0.01102764  | 0.028653776 | TSR3        |
| ENSG00000103187 | 5500.952802 | 7995.499854 | -0.539529147 | 0.01103596  | 0.028672528 | COTL1       |
| ENSG00000226950 | 309.7214788 | 547.5416427 | -0.822524625 | 0.011038712 | 0.028676809 | DANCR       |
| ENSG00000198780 | 28.07055932 | 6.776552991 | 2.046640899  | 0.011039824 | 0.028676832 | FAM169A     |
| ENSG00000198689 | 529.4083324 | 357.8566704 | 0.564611101  | 0.011065246 | 0.028739994 | SLC9A6      |
| ENSG00000273448 | 19.62639423 | 4.606637334 | 2.084051935  | 0.011067871 | 0.028743939 | AC006480.2  |
| ENSG00000059769 | 195.3337883 | 342.9073668 | -0.811719774 | 0.011086211 | 0.028787262 | DNAJC25     |
| ENSG00000248668 | 18.73649995 | 4.545274171 | 2.027314298  | 0.011086769 | 0.028787262 | OXCT1-AS1   |
| ENSG00000207725 | 0.586481695 | 8.85557978  | -3.889632824 | 0.011089009 | 0.0287902   | MIR222      |
| ENSG00000198633 | 15.36693722 | 0.672939833 | 4.465699247  | 0.011094289 | 0.028801032 | ZNF534      |
| ENSG00000259345 | 2.080408748 | 13.79740276 | -2.71596212  | 0.011105113 | 0.02882625  | AC013652.1  |
| ENSG00000229921 | 7.687514293 | 0           | 5.275050476  | 0.011134077 | 0.028898546 | KIF25-AS1   |
| ENSG00000181798 | 5.469816391 | 21.74879856 | -1.997456622 | 0.011158221 | 0.028956545 | LINC00471   |
| ENSG00000179914 | 6.102896903 | 0           | 4.942307294  | 0.011158652 | 0.028956545 | ITLN1       |
| ENSG00000197301 | 67.90292048 | 232.442367  | -1.774580409 | 0.011169284 | 0.028979858 | HMGA2-AS1   |
| ENSG00000176018 | 460.9621237 | 761.3578524 | -0.723642604 | 0.011169906 | 0.028979858 | LYSMD3      |
| ENSG00000151779 | 823.2672964 | 1330.612193 | -0.692408898 | 0.011170982 | 0.028979858 | NBAS        |
| ENSG00000254786 | 6.090360416 | 0           | 4.939589107  | 0.011187129 | 0.029018849 | AP001636.1  |
| ENSG00000230330 | 29.19928865 | 73.44658336 | -1.334088607 | 0.01119948  | 0.029047988 | HMG2P3      |
| ENSG00000259341 | 9.367623151 | 0.774441189 | 3.669813892  | 0.011200706 | 0.029048268 | AC015660.1  |
| ENSG00000196110 | 29.01031481 | 58.62525838 | -1.013825961 | 0.011204066 | 0.02905408  | ZNF699      |
| ENSG00000123500 | 26.36752843 | 572.9182401 | -4.441706799 | 0.011213522 | 0.029075699 | COL10A1     |
| ENSG00000177425 | 250.27976   | 1013.852677 | -2.018495508 | 0.011221851 | 0.029094392 | PAWR        |
| ENSG00000104853 | 1796.365363 | 2589.107414 | -0.527344803 | 0.011234711 | 0.029124827 | CLPTM1      |
| ENSG00000150594 | 43.32495219 | 7.203911778 | 2.588455812  | 0.01124392  | 0.029145794 | ADRA2A      |
| ENSG00000127314 | 1496.210179 | 2535.052964 | -0.760855393 | 0.011247272 | 0.029151573 | RAP1B       |
| ENSG00000185127 | 529.8757438 | 846.9602135 | -0.677042025 | 0.011255451 | 0.029169862 | C6orf120    |
| ENSG00000255819 | 7.632068663 | 0           | 5.265155345  | 0.011258126 | 0.029173886 | KLRC4-KLRK1 |
| novel.224       | 6.939852846 | 0           | 5.128955832  | 0.011296346 | 0.029267088 | -           |
| ENSG00000258847 | 6.939852846 | 0           | 5.128955832  | 0.011296346 | 0.029267088 | AL391261.2  |
| ENSG00000111291 | 0.616711807 | 12.40449683 | -4.34762957  | 0.0113038   | 0.02928348  | GPRC5D      |
| ENSG00000100583 | 7.256984291 | 23.23747365 | -1.683050066 | 0.011314192 | 0.029307481 | SAMD15      |
| ENSG00000258024 | 7.110848325 | 0           | 5.165674427  | 0.011320539 | 0.029320113 | OR5BT1P     |
| ENSG00000164120 | 9.52260593  | 0.387220594 | 4.621949893  | 0.011321326 | 0.029320113 | HPGD        |
| ENSG00000142609 | 17.82418219 | 0.387220594 | 5.527255882  | 0.011329176 | 0.029337518 | CFAP74      |
| ENSG00000257303 | 66.49313044 | 29.08463649 | 1.197848887  | 0.011351434 | 0.029392228 | AC073896.2  |
| ENSG00000154274 | 16.18906285 | 2.231278821 | 2.881682793  | 0.011356201 | 0.029401641 | C4orf19     |
| ENSG00000125398 | 564.9133042 | 126.5779602 | 2.158110447  | 0.011360402 | 0.029409586 | SOX9        |
| ENSG00000120318 | 408.4095749 | 812.0003233 | -0.99108309  | 0.011371816 | 0.029436202 | ARAP3       |
| ENSG00000281333 | 18.58534939 | 4.62670643  | 2.002749618  | 0.011378178 | 0.029449734 | AC024941.2  |
| ENSG00000144659 | 483.5765577 | 709.1705197 | -0.552298284 | 0.01138446  | 0.029463059 | SLC25A38    |
| ENSG00000263745 | 0.293240848 | 6.54158443  | -4.326626493 | 0.011390751 | 0.029476403 | AP005230.1  |
| ENSG00000181017 | 6.894436407 | 0           | 5.120091266  | 0.011401799 | 0.029502056 | OR56B2P     |
| ENSG00000100445 | 218.9663729 | 119.5661003 | 0.870693501  | 0.011406907 | 0.029512333 | SDR39U1     |
| ENSG00000261349 | 10.38846707 | 0.774441189 | 3.813157748  | 0.011437465 | 0.029588446 | AL031432.2  |
| ENSG00000154027 | 1169.767427 | 614.8268544 | 0.928257891  | 0.011439669 | 0.029591204 | AK5         |
| ENSG00000182310 | 168.6623484 | 322.6652446 | -0.934858407 | 0.011463804 | 0.029650681 | SPACA6      |
| ENSG00000167136 | 152.8500509 | 236.8288522 | -0.631045602 | 0.011475065 | 0.029676852 | ENDOG       |

|                 |             |             |              |             |             |            |
|-----------------|-------------|-------------|--------------|-------------|-------------|------------|
| novel.295       | 9.397853263 | 0.774441189 | 3.673439027  | 0.011499503 | 0.029737094 | -          |
| ENSG00000124104 | 581.039875  | 403.7759291 | 0.524952373  | 0.011501677 | 0.029737771 | SNX21      |
| ENSG00000104388 | 2623.10583  | 3710.399829 | -0.500282338 | 0.011502054 | 0.029737771 | RAB2A      |
| ENSG00000108298 | 14018.02012 | 20147.63831 | -0.523331909 | 0.011504006 | 0.02973986  | RPL19      |
| ENSG00000157429 | 56.29406449 | 26.75082883 | 1.070811635  | 0.011514144 | 0.029763106 | ZNF19      |
| ENSG00000173597 | 13.28054497 | 93.32128408 | -2.813398361 | 0.011521213 | 0.029778415 | SULT1B1    |
| ENSG00000164253 | 668.5602282 | 1102.18114  | -0.721573213 | 0.011523608 | 0.029781644 | WDR41      |
| ENSG00000274105 | 16.32857456 | 2.10970837  | 2.941773069  | 0.011525611 | 0.029783857 | AC084824.3 |
| novel.917       | 28.53597802 | 8.539050564 | 1.755971584  | 0.011529765 | 0.029791627 | -          |
| ENSG00000243970 | 272.7321767 | 133.4335525 | 1.032174835  | 0.011536101 | 0.029805037 | PPIEL      |
| ENSG00000273769 | 10.93934805 | 0.387220594 | 4.825087418  | 0.011549032 | 0.029835477 | U52112.1   |
| ENSG00000103197 | 1463.02878  | 2138.161225 | -0.547261225 | 0.01155082  | 0.02983713  | TSC2       |
| ENSG00000199697 | 0           | 4.94310725  | -4.889427006 | 0.011564556 | 0.029869643 | RNU6-446P  |
| ENSG00000171388 | 101.0023097 | 260.7857783 | -1.367746357 | 0.011573779 | 0.029890493 | APLN       |
| ENSG00000182150 | 507.0999886 | 309.2247317 | 0.713338514  | 0.011595489 | 0.029943583 | ERCC6L2    |
| novel.589       | 11.50347753 | 2.191140629 | 2.407079063  | 0.011600664 | 0.029953971 | -          |
| ENSG00000218175 | 160.0761921 | 260.4595014 | -0.702941307 | 0.011609827 | 0.02997465  | AC016739.1 |
| ENSG00000131067 | 809.7191686 | 550.2703981 | 0.557415103  | 0.011614365 | 0.029983388 | GGT7       |
| novel.57        | 35.64500323 | 4.851062506 | 2.866843239  | 0.011615703 | 0.029983863 | -          |
| ENSG00000271631 | 9.103358767 | 0.713078025 | 3.666430847  | 0.011618704 | 0.029988629 | AL139041.1 |
| novel.1071      | 11.0239836  | 0.387220594 | 4.833723139  | 0.011635943 | 0.03003014  | -          |
| ENSG00000120742 | 2478.205486 | 4228.417649 | -0.770840194 | 0.011648683 | 0.030060036 | SERP1      |
| ENSG00000066926 | 315.3781887 | 545.2569974 | -0.790474573 | 0.011654617 | 0.03007236  | FECH       |
| ENSG00000272841 | 104.5006704 | 56.08335811 | 0.897966985  | 0.011676583 | 0.030126049 | AL139393.3 |
| ENSG00000134318 | 850.2166476 | 1236.251146 | -0.540296889 | 0.01169121  | 0.030160791 | ROCK2      |
| ENSG00000111737 | 1118.964685 | 1640.239479 | -0.551924857 | 0.011693697 | 0.030164211 | RAB35      |
| ENSG00000055957 | 11.68242218 | 0           | 5.879423342  | 0.011728086 | 0.030249917 | ITIH1      |
| ENSG00000260910 | 19.46123971 | 60.10447686 | -1.624268145 | 0.011740497 | 0.030278922 | LINC00565  |
| ENSG00000183570 | 94.47439526 | 173.6342693 | -0.876593242 | 0.011765198 | 0.030339614 | PCBP3      |
| ENSG00000266472 | 1175.942802 | 1672.876103 | -0.508530441 | 0.011768058 | 0.030343977 | MRPS21     |
| ENSG00000232021 | 13.47327975 | 1.4981317   | 3.198212773  | 0.011778113 | 0.03036689  | LEF1-AS1   |
| ENSG00000255145 | 14.1464061  | 2.261960402 | 2.67915973   | 0.011780869 | 0.030370981 | STX17-AS1  |
| ENSG00000256139 | 15.40504523 | 3.475657132 | 2.12611625   | 0.01180519  | 0.030430662 | AC007637.1 |
| ENSG00000101134 | 93.27169996 | 19.94731867 | 2.219214207  | 0.011809673 | 0.030439199 | DOK5       |
| ENSG00000105699 | 202.4891548 | 124.2676893 | 0.704864544  | 0.011841826 | 0.030519043 | LSR        |
| ENSG00000161544 | 907.3600579 | 1821.871118 | -1.005763886 | 0.011844331 | 0.030522473 | CYGB       |
| novel.926       | 12.01585105 | 0           | 5.919969953  | 0.011848731 | 0.030530784 | -          |
| ENSG00000100815 | 774.6119679 | 1113.455085 | -0.523301292 | 0.011849958 | 0.030530917 | TRIP11     |
| ENSG00000221930 | 62.42239037 | 132.6736106 | -1.088250427 | 0.011861738 | 0.030558236 | FAM45BP    |
| ENSG00000162419 | 270.0484034 | 384.6326586 | -0.509908999 | 0.011881252 | 0.030605417 | GMEB1      |
| ENSG00000130812 | 48.41840273 | 12.13512227 | 2.003396588  | 0.011882408 | 0.030605417 | ANGPTL6    |
| ENSG00000285918 | 6.936020629 | 0.356539013 | 4.166754057  | 0.011888265 | 0.030617468 | AC092376.3 |
| ENSG00000099984 | 10.09773352 | 31.5095898  | -1.644199543 | 0.011897641 | 0.030638578 | GSTT2      |
| ENSG00000268849 | 5.440839927 | 0           | 4.777789391  | 0.011910972 | 0.030669867 | SIGLEC22P  |
| ENSG00000257398 | 5.434571684 | 0           | 4.776296779  | 0.011925415 | 0.030704015 | AC126177.3 |
| novel.943       | 3.992329314 | 39.34044263 | -3.304221441 | 0.011949575 | 0.03076317  | -          |
| ENSG00000186280 | 19.03106572 | 50.44647124 | -1.40834043  | 0.01196205  | 0.030792234 | KDM4D      |
| ENSG00000115355 | 973.1562745 | 1442.394829 | -0.567914452 | 0.011967708 | 0.030803748 | CCDC88A    |
| ENSG00000187118 | 252.9770394 | 392.5453292 | -0.633288051 | 0.011972172 | 0.030812185 | CMC1       |
| ENSG00000262050 | 13.61286274 | 2.782648203 | 2.267334688  | 0.011974605 | 0.030815392 | AC005696.1 |
| ENSG00000131386 | 279.3530308 | 647.3046318 | -1.21261016  | 0.011975964 | 0.030815839 | GALNT15    |

|                 |             |             |              |             |             |              |
|-----------------|-------------|-------------|--------------|-------------|-------------|--------------|
| ENSG00000139890 | 26.54855345 | 7.947671385 | 1.743549578  | 0.01198321  | 0.03083143  | REM2         |
| ENSG00000151952 | 1.525410814 | 10.21207193 | -2.753674996 | 0.01199348  | 0.030854799 | TMEM132D     |
| ENSG00000105373 | 6243.924127 | 4011.47138  | 0.638350165  | 0.012006305 | 0.030884734 | NOP53        |
| ENSG00000154736 | 141.7646656 | 48.60112874 | 1.54267174   | 0.012013983 | 0.030901426 | ADAMTS5      |
| ENSG00000284634 | 11.79922567 | 2.51699806  | 2.230539344  | 0.012022315 | 0.030919794 | AC092821.3   |
| ENSG00000180998 | 82.80160318 | 39.32867427 | 1.072350663  | 0.012024075 | 0.030921259 | GPR137C      |
| ENSG00000161010 | 88.2068424  | 40.01325407 | 1.141550954  | 0.012039978 | 0.030959092 | MRNIP        |
| ENSG00000088888 | 2381.031531 | 3489.624243 | -0.55142012  | 0.012046563 | 0.03097296  | MAVS         |
| ENSG00000164591 | 115.1287844 | 19.66707484 | 2.552643864  | 0.012052058 | 0.030984021 | MYOZ3        |
| ENSG00000135525 | 18.22057894 | 4.923038154 | 1.874164711  | 0.012053851 | 0.030985566 | MAP7         |
| ENSG00000129194 | 63.17721806 | 29.9618633  | 1.078733782  | 0.012057527 | 0.030991947 | SOX15        |
| ENSG00000147457 | 759.2613125 | 1113.701497 | -0.552865044 | 0.012068844 | 0.031017969 | CHMP7        |
| ENSG00000066027 | 624.7507244 | 416.2493192 | 0.585293953  | 0.012093915 | 0.031079329 | PPP2R5A      |
| ENSG00000279953 | 0.908699006 | 10.38567733 | -3.520766318 | 0.012103435 | 0.031100716 | AC117503.3   |
| ENSG00000140943 | 2113.907738 | 3104.250313 | -0.554277402 | 0.012109445 | 0.031112167 | MBTPS1       |
| ENSG00000139637 | 582.4328691 | 849.8391451 | -0.545195924 | 0.012110286 | 0.031112167 | C12orf10     |
| ENSG00000141349 | 1145.365748 | 1781.945405 | -0.637713755 | 0.012114995 | 0.031121188 | G6PC3        |
| ENSG00000186184 | 1144.169395 | 1581.102018 | -0.466507451 | 0.012123579 | 0.031140159 | POLR1D       |
| ENSG00000187682 | 5.983230103 | 0           | 4.916061822  | 0.012138454 | 0.031175284 | ERAS         |
| ENSG00000157823 | 424.219092  | 274.3507811 | 0.6297689    | 0.01214439  | 0.031187446 | AP3S2        |
| novel.29        | 13.80559752 | 1.803920035 | 2.93821279   | 0.012150463 | 0.031197191 | -            |
| ENSG00000230606 | 68.19251475 | 15.17524828 | 2.165580343  | 0.012150586 | 0.031197191 | AC092683.1   |
| ENSG00000103512 | 82.81206    | 266.3708183 | -1.686148286 | 0.012161647 | 0.031222505 | NOMO1        |
| ENSG00000178795 | 5.129976726 | 0           | 4.693202363  | 0.012165604 | 0.031229577 | GDPD4        |
| ENSG00000286705 | 15.74363125 | 3.973835692 | 1.99041709   | 0.012170659 | 0.031239468 | AC079140.6   |
| novel.33        | 15.58746609 | 2.567748738 | 2.616845576  | 0.012174397 | 0.031243762 | -            |
| ENSG00000125744 | 79.68029179 | 220.6568147 | -1.469244346 | 0.012174737 | 0.031243762 | RTN2         |
| ENSG00000287385 | 32.45119367 | 7.060987961 | 2.213177923  | 0.012193826 | 0.031289657 | AL121820.3   |
| ENSG00000189367 | 18.12104179 | 3.068367442 | 2.533083543  | 0.012200785 | 0.031304423 | KIAA0408     |
| ENSG00000198538 | 254.8200802 | 163.2508222 | 0.641236485  | 0.012208331 | 0.031320691 | ZNF28        |
| ENSG00000207342 | 5.49377826  | 0           | 4.790434154  | 0.012215571 | 0.031336172 | RF00019      |
| ENSG00000196503 | 5.730319829 | 26.25868643 | -2.199270481 | 0.012230264 | 0.031369405 | ARL9         |
| ENSG00000175741 | 45.954917   | 89.06895555 | -0.956650997 | 0.012230941 | 0.031369405 | RWDD4P2      |
| ENSG00000250041 | 1.214547612 | 11.88239637 | -3.287324291 | 0.012257826 | 0.031435255 | AC069360.1   |
| ENSG00000259732 | 13.44151126 | 1.722487775 | 2.936711192  | 0.012262422 | 0.03144394  | AC092757.2   |
| ENSG00000181924 | 820.8828625 | 1277.078667 | -0.637782243 | 0.012265001 | 0.031447448 | COA4         |
| ENSG00000002822 | 10.30655227 | 28.45183484 | -1.461482144 | 0.012284978 | 0.03149556  | MAD1L1       |
| ENSG00000099625 | 192.2472947 | 357.4572023 | -0.894000655 | 0.012290603 | 0.031506874 | CBARP        |
| ENSG00000111432 | 42.64240921 | 3.364699167 | 3.645608516  | 0.012307648 | 0.031547455 | FZD10        |
| ENSG00000274682 | 9.99916528  | 0           | 5.656926128  | 0.012309425 | 0.031548898 | AC015540.1   |
| novel.201       | 22.68975234 | 7.4506487   | 1.600071441  | 0.012336944 | 0.03161631  | -            |
| ENSG00000090487 | 1132.935322 | 1734.200227 | -0.614080619 | 0.012339125 | 0.031618779 | SPG21        |
| ENSG00000155099 | 531.6128371 | 324.3457148 | 0.713516273  | 0.012353933 | 0.031653604 | PIP4P2       |
| ENSG00000212663 | 6.856684402 | 0           | 5.11265472   | 0.012397591 | 0.031760912 | AC003035.1   |
| ENSG00000139726 | 958.4970527 | 1507.302247 | -0.653295421 | 0.012398259 | 0.031760912 | DENR         |
| ENSG00000205930 | 5.484931447 | 0           | 4.788326129  | 0.012413489 | 0.031796543 | C21orf62-AS1 |
| ENSG00000159251 | 0.923814062 | 11.05031643 | -3.597938286 | 0.012414616 | 0.031796543 | ACTC1        |
| ENSG00000266507 | 0.308355904 | 6.991324063 | -4.420597869 | 0.012419247 | 0.031805269 | MIR4479      |
| ENSG00000143079 | 1314.347494 | 849.6201226 | 0.629371412  | 0.012426458 | 0.0318206   | CTTNBP2NL    |
| ENSG00000171858 | 3114.962962 | 4799.874908 | -0.623802837 | 0.012446312 | 0.0318683   | RPS21        |
| ENSG00000130940 | 33.75825474 | 5.369310161 | 2.650391234  | 0.012449207 | 0.031872571 | CASZ1        |

|                 |             |             |              |             |             |            |
|-----------------|-------------|-------------|--------------|-------------|-------------|------------|
| ENSG00000103196 | 880.756527  | 363.2635034 | 1.277856918  | 0.012451959 | 0.031876475 | CRISPLD2   |
| ENSG00000102178 | 718.853555  | 979.4962477 | -0.446337432 | 0.012457668 | 0.031887949 | UBL4A      |
| ENSG00000181585 | 7.973233248 | 0.356539013 | 4.365463261  | 0.012467867 | 0.03191091  | TMIE       |
| ENSG00000151665 | 203.2364605 | 295.5029006 | -0.540598906 | 0.012469358 | 0.031911584 | PIGF       |
| ENSG00000279296 | 24.94903446 | 7.338534859 | 1.750741824  | 0.012510252 | 0.032013085 | PRAL       |
| ENSG00000119574 | 256.3667752 | 406.3334978 | -0.664578797 | 0.012518521 | 0.032031092 | ZBTB45     |
| novel.247       | 52.94896148 | 170.6670177 | -1.689222369 | 0.012523113 | 0.032039685 | -          |
| ENSG00000143543 | 276.4403094 | 155.7305568 | 0.826574425  | 0.012531667 | 0.032058413 | JTB        |
| ENSG00000119661 | 441.9038344 | 287.1781888 | 0.6220864    | 0.012537084 | 0.032069112 | DNAL1      |
| ENSG00000033030 | 671.8074903 | 466.749448  | 0.525421982  | 0.012540201 | 0.032073928 | ZCCHC8     |
| ENSG00000005961 | 25.00287044 | 5.481424002 | 2.197700333  | 0.012548243 | 0.032091337 | ITGA2B     |
| ENSG00000174740 | 68.69398927 | 21.88342164 | 1.642958257  | 0.012558629 | 0.032113607 | PABPC5     |
| ENSG00000206535 | 28.33593481 | 60.60625144 | -1.098964059 | 0.012559423 | 0.032113607 | LNP1       |
| ENSG00000265996 | 6.665488001 | 0.387220594 | 4.108520432  | 0.01257088  | 0.03213974  | MIR3671    |
| ENSG00000135925 | 7.069548837 | 0           | 5.154063013  | 0.012572786 | 0.032141449 | WNT10A     |
| ENSG00000227069 | 5.817249219 | 0           | 4.872715008  | 0.012579442 | 0.032155302 | CNN2P2     |
| ENSG00000285865 | 5.174068246 | 0           | 4.704237839  | 0.01259034  | 0.032179992 | AC010285.3 |
| ENSG00000274423 | 14.99840583 | 40.58824139 | -1.431439096 | 0.012596341 | 0.032192163 | SEC22B2    |
| ENSG00000168906 | 2525.705439 | 3618.555245 | -0.518808119 | 0.012605761 | 0.032210571 | MAT2A      |
| ENSG00000264727 | 7.057012349 | 0           | 5.151656934  | 0.012606023 | 0.032210571 | AC005725.1 |
| ENSG00000063245 | 2427.873818 | 3519.115242 | -0.53548063  | 0.012613405 | 0.032226264 | EPN1       |
| ENSG00000091106 | 79.00680978 | 23.46961688 | 1.757747262  | 0.012625149 | 0.032253097 | NLRC4      |
| ENSG00000100288 | 40.3030792  | 10.63930232 | 1.929650399  | 0.012629701 | 0.032261554 | CHKB       |
| novel.359       | 5.39424111  | 0           | 4.76658582   | 0.012644045 | 0.032293697 | -          |
| ENSG00000235997 | 6.440229271 | 0           | 5.019551647  | 0.012645893 | 0.032293697 | LINC01936  |
| ENSG00000182158 | 2580.609303 | 4229.932117 | -0.712844909 | 0.012646013 | 0.032293697 | CREB3L2    |
| ENSG00000227992 | 8.385856162 | 27.97488126 | -1.731463311 | 0.012664093 | 0.032336688 | AC108463.1 |
| ENSG00000181856 | 28.34220305 | 6.584034372 | 2.113370778  | 0.012682612 | 0.032380791 | SLC2A4     |
| ENSG00000237840 | 23.77077175 | 7.836713419 | 1.597787577  | 0.012689358 | 0.032393318 | FAM21FP    |
| ENSG00000213020 | 167.8980335 | 87.82085283 | 0.936587101  | 0.012690011 | 0.032393318 | ZNF611     |
| ENSG00000174876 | 5.128723077 | 0           | 4.69287938   | 0.012699336 | 0.03241075  | AMY1B      |
| ENSG00000258443 | 5.128723077 | 0           | 4.69287938   | 0.012699336 | 0.03241075  | AC005225.1 |
| ENSG00000169288 | 299.8743186 | 516.8035744 | -0.785879013 | 0.012718388 | 0.032456188 | MRPL1      |
| ENSG00000143622 | 843.4797461 | 507.5068812 | 0.733251204  | 0.012722569 | 0.032463668 | RIT1       |
| ENSG00000101972 | 1829.096021 | 1272.238294 | 0.523896727  | 0.012737876 | 0.032499534 | STAG2      |
| ENSG00000136933 | 407.8203127 | 682.634008  | -0.743659026 | 0.012744083 | 0.032512177 | RABEPK     |
| ENSG00000284969 | 0.600343103 | 7.154316975 | -3.567228902 | 0.012755868 | 0.032539049 | AL049629.2 |
| ENSG00000287550 | 6.632750591 | 0           | 5.063745058  | 0.012758631 | 0.032542902 | AL450345.2 |
| ENSG00000198734 | 6.752417392 | 0           | 5.087885501  | 0.012765792 | 0.03255797  | F5         |
| ENSG00000235649 | 8.58360554  | 0.387220594 | 4.472165444  | 0.012777493 | 0.032584614 | MXRA5Y     |
| ENSG00000221986 | 9.08949736  | 1.029478846 | 3.099909945  | 0.012786335 | 0.032603963 | MYBPHL     |
| novel.558       | 24.3669979  | 96.19893108 | -1.979911514 | 0.012789964 | 0.032610016 | -          |
| ENSG00000273226 | 37.33474183 | 16.36759164 | 1.184625673  | 0.012805968 | 0.032647616 | AL391834.2 |
| ENSG00000138326 | 9884.272524 | 15989.7683  | -0.693948517 | 0.012813998 | 0.032664884 | RPS24      |
| ENSG00000111325 | 8.11908448  | 23.21496441 | -1.513494475 | 0.012818099 | 0.032672132 | OGFOD2     |
| ENSG00000226239 | 5.726558882 | 0           | 4.851966982  | 0.012823097 | 0.032681665 | AL031658.1 |
| ENSG00000270000 | 9.343732554 | 0.723690511 | 3.699521126  | 0.012830553 | 0.032697458 | AC005479.2 |
| ENSG00000138750 | 542.9287807 | 783.3527244 | -0.528936526 | 0.012844294 | 0.032727266 | NUP54      |
| ENSG00000174748 | 16371.69437 | 23306.85023 | -0.509552803 | 0.012844768 | 0.032727266 | RPL15      |
| ENSG00000182628 | 1247.879168 | 781.11332   | 0.67563685   | 0.012846206 | 0.032727718 | SKA2       |
| ENSG00000164070 | 347.4998562 | 142.1429161 | 1.288174392  | 0.012849949 | 0.032732639 | HSPA4L     |



|                 |             |             |              |             |             |            |
|-----------------|-------------|-------------|--------------|-------------|-------------|------------|
| ENSG00000097033 | 1919.685786 | 2631.795226 | -0.455086667 | 0.012850657 | 0.032732639 | SH3GLB1    |
| ENSG00000134363 | 236.5551952 | 1022.245409 | -2.111667303 | 0.012853134 | 0.032735738 | FST        |
| ENSG00000126775 | 839.808339  | 458.3895126 | 0.873989298  | 0.012855314 | 0.032738082 | ATG14      |
| ENSG00000165078 | 5.712697475 | 0           | 4.848774568  | 0.012860856 | 0.032748985 | CPA6       |
| novel.476       | 37.76692493 | 131.3990775 | -1.797754538 | 0.012868247 | 0.032764594 | -          |
| ENSG00000127081 | 169.1175527 | 93.94124303 | 0.847337598  | 0.012877904 | 0.03278597  | ZNF484     |
| ENSG00000085998 | 1618.218273 | 2263.596463 | -0.484171575 | 0.012881945 | 0.032793044 | POMGNT1    |
| ENSG00000128590 | 350.7964504 | 722.9153955 | -1.043117027 | 0.012892941 | 0.032814899 | DNAJB9     |
| ENSG00000280435 | 155.0690462 | 56.57203288 | 1.456845642  | 0.012893056 | 0.032814899 | AC006058.4 |
| ENSG00000077150 | 1178.038912 | 1971.388093 | -0.742626248 | 0.012897185 | 0.032822193 | NFKB2      |
| ENSG00000173585 | 12.94593336 | 0           | 6.027600119  | 0.012902126 | 0.032831552 | CCR9       |
| ENSG00000279744 | 8.503015665 | 26.95139139 | -1.662783028 | 0.012911812 | 0.032847821 | AC132938.5 |
| ENSG00000236751 | 9.764162094 | 0.774441189 | 3.724562143  | 0.01291222  | 0.032847821 | LINC01186  |
| ENSG00000241269 | 12.98605047 | 2.822786395 | 2.188984955  | 0.012912313 | 0.032847821 | AC093620.1 |
| ENSG00000244731 | 309.1048908 | 10.15430479 | 4.924702493  | 0.012935647 | 0.032903961 | C4A        |
| ENSG00000146826 | 489.9087593 | 324.6385918 | 0.593074064  | 0.012938705 | 0.032908516 | MAP11      |
| ENSG00000243175 | 9.350000797 | 1.130980201 | 3.092710389  | 0.012951872 | 0.03293878  | RPSAP36    |
| ENSG00000070601 | 11.06947131 | 0           | 5.801634423  | 0.012977823 | 0.033001549 | FRMPD1     |
| ENSG00000159871 | 31.00400763 | 9.579270291 | 1.688711607  | 0.012990398 | 0.033030293 | LYPD5      |
| ENSG00000166548 | 784.2918779 | 549.870814  | 0.511902157  | 0.013001288 | 0.033054747 | TK2        |
| ENSG00000197182 | 73.14948689 | 157.1447689 | -1.102166656 | 0.013028068 | 0.033119592 | MIRLET7BHG |
| ENSG00000285813 | 37.42897965 | 16.85631359 | 1.151334088  | 0.013036254 | 0.033137161 | AP000813.1 |
| novel.283       | 21.84283848 | 5.584081233 | 1.986667894  | 0.013044153 | 0.033153995 | -          |
| ENSG00000105372 | 12742.67995 | 20288.29308 | -0.670984419 | 0.013055395 | 0.033179324 | RPS19      |
| ENSG00000187775 | 97.37009192 | 50.49940527 | 0.945263703  | 0.013059524 | 0.033186569 | DNAH17     |
| ENSG00000059378 | 887.934894  | 601.5596086 | 0.561296045  | 0.013069583 | 0.033208883 | PARP12     |
| ENSG00000111011 | 1741.081046 | 1196.222879 | 0.541400578  | 0.013088663 | 0.033254113 | RSRC2      |
| ENSG00000256812 | 7.740167891 | 0.387220594 | 4.326570194  | 0.013123124 | 0.033338408 | CAPNS2     |
| ENSG00000286207 | 75.94711351 | 26.91497762 | 1.494578355  | 0.013138084 | 0.033373149 | AC012443.2 |
| ENSG00000180357 | 768.3089565 | 1227.413123 | -0.675607774 | 0.013159817 | 0.033420604 | ZNF609     |
| ENSG00000110497 | 444.7644713 | 673.4227967 | -0.597986029 | 0.013160163 | 0.033420604 | AMBRA1     |
| ENSG00000211899 | 6.749838823 | 0           | 5.087376316  | 0.013160625 | 0.033420604 | IGHM       |
| ENSG00000116329 | 13.40655128 | 2.578361223 | 2.396144591  | 0.013167796 | 0.033435546 | OPRD1      |
| ENSG00000185897 | 6.849091238 | 0           | 5.11111885   | 0.013176734 | 0.033454971 | FFAR3      |
| ENSG00000130165 | 686.0715816 | 1014.048031 | -0.563934214 | 0.013185909 | 0.033474996 | ELOF1      |
| ENSG00000119684 | 496.44032   | 346.6556434 | 0.518565166  | 0.01319493  | 0.033494625 | MLH3       |
| novel.88        | 5.705104311 | 0           | 4.847006361  | 0.013198624 | 0.033499961 | -          |
| ENSG00000226864 | 18.71414774 | 3.220619475 | 2.535839219  | 0.013199611 | 0.033499961 | ATE1-AS1   |
| ENSG00000279933 | 5.698836068 | 0           | 4.845564422  | 0.013216496 | 0.033537774 | AL031595.1 |
| ENSG00000197444 | 3.66251884  | 17.10317891 | -2.232770498 | 0.013217092 | 0.033537774 | OGDHL      |
| ENSG00000147234 | 5.462294498 | 0           | 4.782937129  | 0.013220285 | 0.033542601 | FRMPD3     |
| ENSG00000254528 | 5.175321895 | 0           | 4.704567804  | 0.013225974 | 0.033553756 | AP000757.1 |
| ENSG00000172476 | 54.90558682 | 27.46377846 | 1.003226729  | 0.013230789 | 0.033562695 | RAB40A     |
| ENSG00000104213 | 313.3214689 | 77.93049437 | 2.006323644  | 0.013275117 | 0.033671765 | PDGFRL     |
| ENSG00000121075 | 5.156445892 | 0           | 4.699839838  | 0.013276377 | 0.033671765 | TBX4       |
| ENSG00000107859 | 0           | 4.932494765 | -4.886635567 | 0.013305027 | 0.033741132 | PITX3      |
| ENSG00000137168 | 351.2307421 | 740.8053013 | -1.077093133 | 0.013327631 | 0.033791332 | PPIL1      |
| ENSG00000107438 | 695.7498476 | 2374.581082 | -1.771067335 | 0.013328407 | 0.033791332 | PDLIM1     |
| ENSG00000072849 | 697.9209535 | 971.7808948 | -0.47780934  | 0.013328724 | 0.033791332 | DERL2      |
| ENSG00000115239 | 223.0743939 | 374.6751107 | -0.74789806  | 0.01333808  | 0.033811752 | ASB3       |
| ENSG00000265724 | 0.293240848 | 6.257021066 | -4.259624018 | 0.013343762 | 0.033822855 | MIR4284    |

|                 |             |             |              |             |             |            |
|-----------------|-------------|-------------|--------------|-------------|-------------|------------|
| ENSG00000173838 | 29.10609101 | 12.24967626 | 1.250571354  | 0.013348267 | 0.033830976 | 10-Mar     |
| ENSG00000179362 | 13.44025761 | 88.51278742 | -2.716866332 | 0.013355993 | 0.033847255 | HMG2P46    |
| ENSG00000233261 | 5.11486167  | 0           | 4.689372385  | 0.013387803 | 0.033917943 | FAM238A    |
| ENSG00000279907 | 5.11486167  | 0           | 4.689372385  | 0.013387803 | 0.033917943 | AC018695.7 |
| ENSG00000226040 | 5.11486167  | 0           | 4.689372385  | 0.013387803 | 0.033917943 | AC005740.1 |
| ENSG00000232712 | 14.43212506 | 3.240688571 | 2.158751561  | 0.013391892 | 0.033924995 | KIZ-AS1    |
| ENSG00000225166 | 0           | 5.574753017 | -5.064112218 | 0.013397869 | 0.033936827 | AC012462.1 |
| ENSG00000164329 | 961.8473149 | 667.5531375 | 0.526955481  | 0.013408122 | 0.033959486 | TENT2      |
| ENSG00000138190 | 214.2135179 | 75.55539264 | 1.501036865  | 0.013452209 | 0.034067828 | EXOC6      |
| ENSG00000204583 | 15.35622385 | 1.00940975  | 3.883371185  | 0.01346025  | 0.034084461 | LRCOL1     |
| ENSG00000249846 | 23.64261414 | 7.440036214 | 1.660684101  | 0.013461401 | 0.034084461 | LINC02021  |
| ENSG00000168904 | 268.6136829 | 173.4126574 | 0.63218562   | 0.013478989 | 0.034125669 | LRRC28     |
| ENSG00000279330 | 12.66508681 | 2.578361223 | 2.317149396  | 0.01349078  | 0.034152193 | AJ003147.3 |
| ENSG00000161996 | 497.289899  | 784.3382122 | -0.657151806 | 0.013497713 | 0.034166416 | WDR90      |
| ENSG00000185838 | 128.4195873 | 226.0232309 | -0.8157835   | 0.013514104 | 0.034204573 | GNB1L      |
| ENSG00000159228 | 1642.689794 | 1114.595432 | 0.559268493  | 0.013524745 | 0.034228171 | CBR1       |
| ENSG00000186862 | 49.71131766 | 20.06619219 | 1.31540281   | 0.013551315 | 0.03429176  | PDZD7      |
| ENSG00000246695 | 409.3571371 | 220.3538986 | 0.894020168  | 0.013552511 | 0.03429176  | RASSF8-AS1 |
| ENSG00000068354 | 272.8246467 | 426.1964176 | -0.642772581 | 0.013571874 | 0.034337409 | TBC1D25    |
| ENSG00000260922 | 0           | 9.343017459 | -5.80286322  | 0.013574903 | 0.03434173  | AC009139.1 |
| ENSG00000128203 | 50.28332503 | 103.5790512 | -1.042741709 | 0.013579879 | 0.034349756 | ASPHD2     |
| ENSG00000173250 | 6.347031636 | 0.356539013 | 4.038373195  | 0.01358072  | 0.034349756 | GPR151     |
| ENSG00000104899 | 81.24264385 | 15.95328549 | 2.343918713  | 0.013583854 | 0.034354338 | AMH        |
| ENSG00000168883 | 727.0683719 | 1052.555914 | -0.533967304 | 0.013585805 | 0.034355927 | USP39      |
| ENSG00000134873 | 20.79595268 | 2.91483114  | 2.841610943  | 0.013608475 | 0.034409168 | CLDN10     |
| ENSG00000163751 | 7.459534802 | 0.356539013 | 4.27310474   | 0.013609507 | 0.034409168 | CPA3       |
| ENSG00000224963 | 6.362146692 | 0.336469917 | 4.041320594  | 0.01361511  | 0.034419984 | U82695.1   |
| ENSG00000214194 | 682.2139635 | 930.1876444 | -0.447454075 | 0.013627177 | 0.034447139 | SMIM30     |
| ENSG00000005379 | 308.9174907 | 70.48090751 | 2.133753259  | 0.013662182 | 0.034532266 | TSPOAP1    |
| ENSG00000141956 | 281.7814422 | 184.8164304 | 0.608005367  | 0.013691607 | 0.034603273 | PRDM15     |
| ENSG00000060140 | 3.380632102 | 23.25368994 | -2.785316619 | 0.013704258 | 0.034631877 | STYK1      |
| ENSG00000271978 | 24.07439779 | 6.258305336 | 1.927150783  | 0.013718031 | 0.034661022 | AL359643.2 |
| ENSG00000284664 | 15.53327411 | 1.885352294 | 3.0741612    | 0.013718459 | 0.034661022 | AL161756.3 |
| ENSG00000197601 | 2342.754458 | 1523.636622 | 0.620608234  | 0.013722948 | 0.034668991 | FAR1       |
| ENSG00000115207 | 619.7002139 | 919.99089   | -0.56979191  | 0.013740068 | 0.034708869 | GTF3C2     |
| ENSG00000266456 | 0.307102255 | 5.788368213 | -4.150608921 | 0.013747264 | 0.034723669 | AP001178.3 |
| ENSG00000225663 | 1925.422434 | 1319.451552 | 0.545406446  | 0.01375481  | 0.034739353 | MCRIP1     |
| ENSG00000212694 | 243.8158699 | 143.8347226 | 0.76083186   | 0.013761586 | 0.034753086 | LINC01089  |
| ENSG00000169718 | 1201.044486 | 1845.088886 | -0.619337016 | 0.013776891 | 0.034788356 | DUS1L      |
| ENSG00000233297 | 15.50207509 | 2.894762044 | 2.426083441  | 0.013814261 | 0.034879331 | RASA4DP    |
| ENSG00000166888 | 3110.558359 | 4154.480943 | -0.417462305 | 0.013837191 | 0.034933383 | STAT6      |
| ENSG00000213523 | 868.7379611 | 1268.346431 | -0.545772725 | 0.013845235 | 0.034950743 | SRA1       |
| ENSG00000204257 | 155.5806372 | 0           | 9.615097373  | 0.013862221 | 0.034990222 | HLA-DMA    |
| ENSG00000187608 | 3152.661762 | 6135.891071 | -0.960706631 | 0.013865573 | 0.034995284 | ISG15      |
| ENSG00000129467 | 5.189183302 | 24.937067   | -2.263483627 | 0.013874735 | 0.035015007 | ADCY4      |
| novel.607       | 318.2442959 | 188.730444  | 0.752428929  | 0.013887323 | 0.035043371 | -          |
| ENSG00000105393 | 393.1534417 | 568.0469835 | -0.530648926 | 0.013890852 | 0.035048872 | BABAM1     |
| ENSG00000165209 | 135.4191449 | 79.68220388 | 0.763449146  | 0.013900507 | 0.035069827 | STRBP      |
| ENSG00000111877 | 220.9585986 | 118.2438858 | 0.899778095  | 0.01390558  | 0.035079218 | MCM9       |
| ENSG00000232956 | 287.1993601 | 473.6398786 | -0.721929231 | 0.013910917 | 0.035089275 | SNHG15     |
| ENSG00000128463 | 1262.222111 | 1699.485968 | -0.429149763 | 0.013920994 | 0.035111284 | EMC4       |

|                 |             |             |              |             |             |            |
|-----------------|-------------|-------------|--------------|-------------|-------------|------------|
| ENSG00000144306 | 433.0805386 | 286.2629256 | 0.596256313  | 0.013931431 | 0.035134198 | SCRN3      |
| ENSG00000070770 | 398.4353954 | 549.9443651 | -0.464696273 | 0.013934648 | 0.0351389   | CSNK2A2    |
| ENSG00000124205 | 154.7069082 | 0           | 9.606944798  | 0.013943112 | 0.035156832 | EDN3       |
| ENSG00000182518 | 272.0835382 | 161.3125831 | 0.752499817  | 0.013972402 | 0.035224804 | FAM104B    |
| ENSG00000214562 | 48.74613283 | 19.66964338 | 1.308123544  | 0.013972781 | 0.035224804 | NUTM2D     |
| ENSG00000163322 | 110.7225934 | 178.8038345 | -0.692159584 | 0.013976803 | 0.035231523 | ABRAXAS1   |
| ENSG00000165416 | 1034.396543 | 1457.126949 | -0.494448626 | 0.013992599 | 0.03526792  | SUGT1      |
| ENSG00000076928 | 2062.788588 | 3012.618643 | -0.546339407 | 0.014014118 | 0.035318732 | ARHGEF1    |
| ENSG00000082213 | 298.3590514 | 427.7706814 | -0.520347862 | 0.014054794 | 0.035416467 | C5orf22    |
| ENSG00000243364 | 54.42171904 | 138.1921379 | -1.344627905 | 0.014055625 | 0.035416467 | EFNA4      |
| ENSG00000134545 | 15.69230257 | 0.723690511 | 4.444072878  | 0.014060956 | 0.035426464 | KLRC1      |
| ENSG00000188735 | 304.3129056 | 479.0632187 | -0.654543536 | 0.014069513 | 0.035444586 | TMEM120B   |
| ENSG00000211450 | 899.1351996 | 1312.152899 | -0.545339704 | 0.014076437 | 0.035458591 | SELENOH    |
| ENSG00000196968 | 571.2924651 | 993.2744076 | -0.797837015 | 0.014080655 | 0.035464137 | FUT11      |
| novel.868       | 19.44870323 | 3.180481283 | 2.606118972  | 0.014081369 | 0.035464137 | -          |
| ENSG00000117479 | 186.7235711 | 301.562266  | -0.691052078 | 0.014099234 | 0.03550569  | SLC19A2    |
| ENSG00000126903 | 447.941868  | 741.5539627 | -0.727525007 | 0.014103376 | 0.035512677 | SLC10A3    |
| ENSG00000197006 | 52.96289451 | 140.9741913 | -1.411808246 | 0.0141051   | 0.035513577 | METTL9     |
| novel.15        | 0           | 4.73882027  | -4.822906985 | 0.014110727 | 0.035524303 | -          |
| ENSG00000126246 | 34.46118393 | 9.357354359 | 1.868357989  | 0.014116354 | 0.035535024 | IGFLR1     |
| ENSG00000140481 | 0.615458159 | 9.297147071 | -3.936664132 | 0.014120354 | 0.03554165  | CCDC33     |
| ENSG00000125675 | 27.33905276 | 86.83441904 | -1.665923443 | 0.014155968 | 0.035627842 | GRIA3      |
| ENSG00000173926 | 160.9873981 | 59.58666156 | 1.430617096  | 0.014175113 | 0.035672571 | 3-Mar      |
| ENSG00000047648 | 176.3992817 | 75.33090817 | 1.224617928  | 0.014189398 | 0.035705061 | ARHGAP6    |
| ENSG00000224389 | 173.1742714 | 2.355289417 | 6.191153718  | 0.014196144 | 0.035718577 | C4B        |
| ENSG00000144597 | 220.6804725 | 330.535255  | -0.582917031 | 0.014207185 | 0.035742894 | EAF1       |
| ENSG00000206199 | 11.86477176 | 2.140389951 | 2.465342054  | 0.014209246 | 0.03574462  | ANKUB1     |
| novel.53        | 6.691885896 | 0           | 5.075722474  | 0.014219127 | 0.035766013 | -          |
| novel.256       | 10.77992014 | 0           | 5.763321129  | 0.01422234  | 0.035770632 | -          |
| ENSG00000196670 | 441.826906  | 292.4538316 | 0.594608748  | 0.014241654 | 0.035815739 | ZFP62      |
| ENSG00000237950 | 34.85758068 | 11.26979221 | 1.634866177  | 0.014250333 | 0.035834099 | AL357079.1 |
| ENSG00000112130 | 282.0874612 | 432.8295329 | -0.617446709 | 0.014255025 | 0.035842427 | RNF8       |
| ENSG00000132196 | 214.3440402 | 114.1587069 | 0.907603835  | 0.014257671 | 0.035845612 | HSD17B7    |
| ENSG00000178184 | 340.0238818 | 141.8185872 | 1.26299233   | 0.014267999 | 0.035866431 | PARD6G     |
| ENSG00000232112 | 1008.464514 | 641.4391046 | 0.652450282  | 0.014268713 | 0.035866431 | TMA7       |
| ENSG00000070269 | 407.9863374 | 274.5333764 | 0.571482689  | 0.014279071 | 0.035888996 | TMEM260    |
| ENSG00000105887 | 2336.819795 | 3781.107052 | -0.694295262 | 0.014312147 | 0.035966052 | MTPN       |
| ENSG00000273702 | 31.70395915 | 9.822411193 | 1.69494844   | 0.014312498 | 0.035966052 | AC091271.1 |
| ENSG00000223548 | 7.112101973 | 0           | 5.165735999  | 0.014319526 | 0.035980233 | AC034228.1 |
| ENSG00000070388 | 28.42981663 | 4.790855218 | 2.552030542  | 0.014326858 | 0.035995174 | FGF22      |
| ENSG00000121289 | 629.7675042 | 986.0619293 | -0.646884934 | 0.014329362 | 0.035997985 | CEP89      |
| ENSG00000168092 | 1625.452549 | 2275.156234 | -0.485050815 | 0.014343832 | 0.036030853 | PAFAH1B2   |
| ENSG00000224259 | 1.81990531  | 100.844084  | -5.792617861 | 0.014355376 | 0.036056363 | LINC01133  |
| ENSG00000170989 | 162.3395909 | 43.39267532 | 1.89994523   | 0.014371155 | 0.036092473 | S1PR1      |
| ENSG00000111229 | 2583.160682 | 3861.854582 | -0.580118465 | 0.014372531 | 0.036092473 | ARPC3      |
| ENSG00000137821 | 155.1369133 | 92.68856398 | 0.742283116  | 0.014378497 | 0.036103965 | LRRC49     |
| ENSG00000188596 | 15.77260771 | 39.3226381  | -1.315739544 | 0.014431182 | 0.036231217 | CFAP54     |
| ENSG00000272438 | 2.976499995 | 26.36031618 | -3.143775301 | 0.014431964 | 0.036231217 | AL645608.6 |
| ENSG00000141096 | 5.132484024 | 0           | 4.693794859  | 0.014437263 | 0.036241017 | DPEP3      |
| ENSG00000170144 | 5705.496601 | 8332.254456 | -0.546391121 | 0.01443987  | 0.036244059 | HNRNPA3    |
| ENSG00000197746 | 35837.57522 | 21498.49332 | 0.737251501  | 0.014443031 | 0.036248492 | PSAP       |

|                 |             |             |              |             |             |            |
|-----------------|-------------|-------------|--------------|-------------|-------------|------------|
| ENSG00000272240 | 29.5401685  | 9.252256984 | 1.671310153  | 0.014460009 | 0.036286236 | AC004908.1 |
| ENSG00000221164 | 1.847628125 | 11.47523507 | -2.646432808 | 0.014460863 | 0.036286236 | SNORA11F   |
| ENSG00000267454 | 70.56300069 | 29.63240985 | 1.256235005  | 0.014467772 | 0.036300067 | ZNF582-AS1 |
| ENSG00000186063 | 821.9934831 | 1306.100583 | -0.668197855 | 0.014470542 | 0.036303509 | AIDA       |
| ENSG00000160469 | 963.4290853 | 406.5555168 | 1.245328259  | 0.014487462 | 0.036342449 | BRSK1      |
| ENSG00000250569 | 21.36187744 | 5.04345273  | 2.084863633  | 0.01449506  | 0.036355014 | NTAN1P2    |
| ENSG00000258365 | 17.15696843 | 3.005720009 | 2.539325793  | 0.014495269 | 0.036355014 | AC073655.2 |
| ENSG00000175606 | 345.6126533 | 503.3976645 | -0.543118881 | 0.014508468 | 0.036384605 | TMEM70     |
| ENSG00000198673 | 28.74103583 | 10.92514996 | 1.385708702  | 0.014522505 | 0.036416291 | TAFA2      |
| ENSG00000105193 | 9457.387476 | 14177.88448 | -0.584136659 | 0.014554492 | 0.036492943 | RPS16      |
| ENSG00000258181 | 5.186676005 | 0           | 4.707461673  | 0.014555882 | 0.036492943 | AC008083.2 |
| ENSG00000105649 | 42.23577015 | 118.7488584 | -1.490279088 | 0.014561958 | 0.036504655 | RAB3A      |
| ENSG00000040731 | 24.66220405 | 0.672939833 | 5.158319508  | 0.014565139 | 0.036509106 | CDH10      |
| novel.382       | 35.41222261 | 7.764609376 | 2.199805485  | 0.014573075 | 0.036525475 | -          |
| ENSG00000143190 | 525.3049414 | 300.2137234 | 0.8079433    | 0.014583021 | 0.036544561 | POU2F1     |
| ENSG00000227438 | 1.22840902  | 14.95893615 | -3.61054407  | 0.014583504 | 0.036544561 | AP001471.1 |
| ENSG00000274602 | 250.7768053 | 90.08140057 | 1.47791248   | 0.014591921 | 0.036562126 | PI4KAP1    |
| novel.323       | 9.966712605 | 1.803920035 | 2.47146256   | 0.014601634 | 0.036582936 | -          |
| novel.805       | 19.72969232 | 47.94111315 | -1.283533277 | 0.014604618 | 0.036586885 | -          |
| ENSG00000224958 | 5.176575543 | 0           | 4.704917085  | 0.014619051 | 0.03661951  | PGM5-AS1   |
| ENSG00000152439 | 63.50960675 | 116.1429449 | -0.870911217 | 0.014637084 | 0.036646897 | ZNF773     |
| ENSG00000159579 | 513.9205731 | 752.4565094 | -0.550224172 | 0.0146379   | 0.036646897 | RSPRY1     |
| ENSG00000244137 | 5.1703073   | 0           | 4.703346443  | 0.014639131 | 0.036646897 | AL512328.1 |
| ENSG00000232876 | 5.1703073   | 0           | 4.703346443  | 0.014639131 | 0.036646897 | AL353596.1 |
| ENSG00000081842 | 5.1703073   | 0           | 4.703346443  | 0.014639131 | 0.036646897 | PCDHA6     |
| ENSG00000021574 | 363.8449424 | 215.4164892 | 0.754767881  | 0.014639338 | 0.036646897 | SPAST      |
| ENSG00000227634 | 0           | 4.953719736 | -4.891803142 | 0.014639858 | 0.036646897 | LINC01714  |
| ENSG00000280212 | 10.42217339 | 0.672939833 | 3.898611019  | 0.014647716 | 0.036663035 | AC012254.5 |
| ENSG00000007866 | 387.5578199 | 740.158651  | -0.933196193 | 0.014656375 | 0.036681175 | TEAD3      |
| ENSG00000279342 | 30.7483766  | 9.87444614  | 1.631392257  | 0.014662722 | 0.036693525 | AP000866.6 |
| ENSG00000187800 | 489.4126068 | 1587.139447 | -1.697433231 | 0.014664186 | 0.036693653 | PEAR1      |
| ENSG00000075826 | 436.6528816 | 231.7315667 | 0.915084537  | 0.014666521 | 0.036695964 | SEC31B     |
| ENSG00000262097 | 5.14759908  | 0           | 4.697611369  | 0.014680211 | 0.03672665  | LINC02185  |
| ENSG00000178445 | 255.5567992 | 69.63574058 | 1.874263501  | 0.014681613 | 0.03672665  | GLDC       |
| ENSG00000093000 | 850.4405261 | 1314.653341 | -0.628528997 | 0.014690169 | 0.036744516 | NUP50      |
| ENSG00000284095 | 5.476155906 | 0           | 4.786288117  | 0.014711355 | 0.036790423 | AC055733.4 |
| ENSG00000274976 | 5.476155906 | 0           | 4.786288117  | 0.014711355 | 0.036790423 | AC087588.2 |
| ENSG00000230138 | 6.425185486 | 0           | 5.016482162  | 0.014716236 | 0.036799089 | AC119428.2 |
| ENSG00000214654 | 27.92044859 | 64.79639926 | -1.217134582 | 0.014733399 | 0.03683846  | B3GNT10    |
| ENSG00000104904 | 5999.700476 | 9515.760669 | -0.665453779 | 0.014740372 | 0.036852348 | OAZ1       |
| ENSG00000255931 | 5.117368968 | 0           | 4.689963862  | 0.014777213 | 0.036935314 | AP003108.1 |
| ENSG00000220773 | 5.117368968 | 0           | 4.689963862  | 0.014777213 | 0.036935314 | RPSAP44    |
| ENSG00000211454 | 16.24826942 | 3.903015919 | 2.051289208  | 0.014777822 | 0.036935314 | AKR7L      |
| ENSG00000183153 | 2.435363469 | 12.41266917 | -2.356140447 | 0.014780516 | 0.036937166 | GJD3       |
| ENSG00000145217 | 91.63579733 | 42.50812807 | 1.105484698  | 0.014781406 | 0.036937166 | SLC26A1    |
| ENSG00000223784 | 0.307102255 | 5.717548439 | -4.135706722 | 0.014801557 | 0.036983963 | LINP1      |
| ENSG00000126858 | 790.3464527 | 545.5672209 | 0.534639346  | 0.014810728 | 0.037003321 | RHOT1      |
| ENSG00000177733 | 2980.933777 | 4364.416993 | -0.550066862 | 0.014866466 | 0.037134306 | HNRNPA0    |
| ENSG00000142233 | 38.26991001 | 12.10444069 | 1.667695729  | 0.014866483 | 0.037134306 | NTN5       |
| ENSG00000254997 | 6.596180964 | 0.336469917 | 4.09530324   | 0.014867444 | 0.037134306 | KRTAP5-9   |
| ENSG00000280046 | 14.48499212 | 35.2696819  | -1.279336423 | 0.0148764   | 0.037149713 | AC104581.4 |

|                 |             |             |              |             |             |             |
|-----------------|-------------|-------------|--------------|-------------|-------------|-------------|
| ENSG00000254503 | 7.014174478 | 0.387220594 | 4.181100039  | 0.014876472 | 0.037149713 | AC010319.1  |
| ENSG00000014824 | 1199.966726 | 1643.263256 | -0.453494693 | 0.014936327 | 0.037295598 | SLC30A9     |
| ENSG00000284740 | 21.26638597 | 7.083497202 | 1.577167081  | 0.0149539   | 0.03733589  | AL645728.2  |
| ENSG00000135926 | 4011.235316 | 2670.880328 | 0.58684828   | 0.014962956 | 0.037354911 | TMBIM1      |
| ENSG00000186230 | 72.12050818 | 120.9692336 | -0.745248644 | 0.014974288 | 0.037379609 | ZNF749      |
| ENSG00000164038 | 186.5880059 | 362.0983865 | -0.95671093  | 0.014981266 | 0.037393436 | SLC9B2      |
| ENSG00000043514 | 300.980241  | 463.7968719 | -0.623184577 | 0.014998945 | 0.037433966 | TRIT1       |
| ENSG00000253250 | 37.64692995 | 76.07385024 | -1.013160984 | 0.015008428 | 0.037454035 | C8orf88     |
| novel.763       | 71.47642956 | 145.4997816 | -1.024330958 | 0.015017526 | 0.03747314  | -           |
| ENSG00000162148 | 91.39417025 | 42.5763793  | 1.103998941  | 0.015037131 | 0.037518458 | PPP1R32     |
| novel.211       | 5.511400613 | 0           | 4.794757472  | 0.015048718 | 0.037543763 | -           |
| ENSG00000277695 | 10.15038711 | 0           | 5.677789974  | 0.015087378 | 0.037636597 | AC097478.3  |
| ENSG00000234769 | 57.49690199 | 21.61751471 | 1.413151523  | 0.015091055 | 0.037642155 | WASH4P      |
| ENSG00000119457 | 4.851850935 | 0           | 4.612018861  | 0.015099321 | 0.037659159 | SLC46A2     |
| ENSG00000267737 | 13.28939178 | 3.189937893 | 2.049868808  | 0.015101638 | 0.037661321 | AC087645.2  |
| ENSG00000079841 | 16.15034193 | 2.415496705 | 2.717100581  | 0.015105195 | 0.037666579 | RIMS1       |
| ENSG00000156234 | 6.982619446 | 0.387220594 | 4.175279605  | 0.015115402 | 0.037688414 | CXCL13      |
| ENSG00000233547 | 4.836735879 | 0           | 4.608011091  | 0.015147033 | 0.037763657 | AL158212.2  |
| ENSG00000138018 | 1339.802482 | 797.4881381 | 0.748502796  | 0.015174718 | 0.03782905  | SELENOI     |
| ENSG00000165091 | 11.7966471  | 1.029478846 | 3.484157718  | 0.015179977 | 0.037838527 | TMC1        |
| ENSG00000258011 | 1.186824798 | 9.86370526  | -3.036435484 | 0.015191068 | 0.037862542 | HMGA1P3     |
| ENSG00000211699 | 6.392376805 | 0.356539013 | 4.047276768  | 0.015202538 | 0.037887496 | TRGV3       |
| ENSG00000092607 | 102.5706565 | 363.7937075 | -1.827109585 | 0.01522498  | 0.037939413 | TBX15       |
| ENSG00000244151 | 22.57133919 | 7.867395001 | 1.519803288  | 0.015227315 | 0.037939413 | AC010973.2  |
| ENSG00000108641 | 220.3149904 | 325.4725039 | -0.56216478  | 0.015227751 | 0.037939413 | B9D1        |
| ENSG00000232499 | 12.68020186 | 29.39055321 | -1.211792939 | 0.015249969 | 0.037987115 | AL391058.1  |
| ENSG00000170549 | 6.392376805 | 0.336469917 | 4.047278593  | 0.015251284 | 0.037987115 | IRX1        |
| ENSG00000260541 | 6.392376805 | 0.336469917 | 4.047278593  | 0.015251284 | 0.037987115 | AL031722.1  |
| ENSG00000127533 | 3.315086011 | 27.09277415 | -3.026682914 | 0.015268042 | 0.03802521  | F2RL3       |
| ENSG00000075213 | 156.3497647 | 447.1905398 | -1.51643885  | 0.015277646 | 0.038045482 | SEMA3A      |
| ENSG00000284735 | 11.72615769 | 1.844058227 | 2.689903575  | 0.015285645 | 0.038061753 | AL139424.3  |
| ENSG00000176563 | 47.24830264 | 18.31302283 | 1.375210536  | 0.015306946 | 0.038111141 | CNTD1       |
| ENSG00000173227 | 55.22342993 | 178.6374211 | -1.694763168 | 0.015309946 | 0.038114958 | SYT12       |
| ENSG00000196371 | 210.1073624 | 139.4618508 | 0.591421447  | 0.015320234 | 0.038136918 | FUT4        |
| ENSG00000254777 | 7.479664453 | 0.336469917 | 4.276494532  | 0.015321813 | 0.038137193 | AC022182.1  |
| ENSG00000173421 | 18.43093608 | 67.99335362 | -1.885976801 | 0.015344187 | 0.038189226 | CCDC36      |
| ENSG00000273125 | 6.316801524 | 0.336469917 | 4.032385825  | 0.015351204 | 0.038203031 | LINC01990   |
| ENSG00000161896 | 43.8831416  | 9.281654296 | 2.249558763  | 0.0153643   | 0.038231959 | IP6K3       |
| ENSG00000232912 | 6.891929109 | 0.336469917 | 4.158483312  | 0.015385628 | 0.038281363 | RERE-AS1    |
| ENSG00000152082 | 838.248649  | 1280.872909 | -0.611734836 | 0.015390318 | 0.038289367 | MZT2B       |
| ENSG00000099991 | 1253.762277 | 1863.383342 | -0.571480211 | 0.015403189 | 0.038317719 | CABIN1      |
| ENSG00000215559 | 87.91404444 | 11.09503094 | 2.990056435  | 0.015409587 | 0.038329964 | ANKRD20A11P |
| ENSG00000171056 | 23.46205984 | 1.936102971 | 3.632835777  | 0.015428385 | 0.038373049 | SOX7        |
| ENSG00000257267 | 754.0827007 | 493.5012227 | 0.611079887  | 0.01542991  | 0.038373169 | ZNF271P     |
| ENSG00000133067 | 16.30134995 | 1.773238453 | 3.192280159  | 0.015435388 | 0.038383117 | LGR6        |
| ENSG00000162836 | 633.0513362 | 306.6437551 | 1.04639217   | 0.015439339 | 0.038389268 | ACP6        |
| ENSG00000128699 | 1428.641618 | 1037.23731  | 0.461694322  | 0.015496248 | 0.038526519 | ORMDL1      |
| ENSG00000136280 | 938.970182  | 1332.875348 | -0.50543187  | 0.015497504 | 0.038526519 | CCM2        |
| ENSG00000267131 | 7.579201602 | 0.693008929 | 3.414225889  | 0.015504151 | 0.038539357 | AC005746.2  |
| ENSG00000119650 | 303.5692898 | 528.4253983 | -0.799414258 | 0.015512667 | 0.038553876 | IFT43       |
| ENSG00000266258 | 38.01141567 | 11.26149148 | 1.760389188  | 0.01551296  | 0.038553876 | LINC01909   |

|                 |             |             |              |             |             |            |
|-----------------|-------------|-------------|--------------|-------------|-------------|------------|
| ENSG00000126467 | 12.79736137 | 1.345879667 | 3.203377765  | 0.015523696 | 0.038576868 | TSKS       |
| ENSG00000078246 | 985.5170837 | 596.1982955 | 0.725233837  | 0.015546608 | 0.038630108 | TULP3      |
| ENSG00000100949 | 93.27858181 | 258.8216907 | -1.471892839 | 0.015551936 | 0.038639652 | RABGGTA    |
| ENSG00000270170 | 341.8988771 | 481.6289596 | -0.494173465 | 0.015567964 | 0.038675777 | NCBP2AS2   |
| ENSG00000267364 | 9.483529005 | 0.672939833 | 3.756919659  | 0.015581992 | 0.038706925 | AC022706.1 |
| ENSG00000270039 | 29.72377174 | 10.2734351  | 1.528134246  | 0.015587767 | 0.038717568 | AC025165.5 |
| ENSG00000253875 | 15.53202046 | 2.853467977 | 2.44257753   | 0.015621117 | 0.038796697 | AC013643.2 |
| ENSG00000269067 | 5.512654262 | 0           | 4.795080881  | 0.015635631 | 0.038829032 | ZNF728     |
| ENSG00000127528 | 2163.544759 | 592.8666147 | 1.867438969  | 0.015640118 | 0.038836463 | KLF2       |
| ENSG00000125870 | 1082.180923 | 1487.626615 | -0.459202866 | 0.01565448  | 0.03886841  | SNRPB2     |
| ENSG00000057252 | 782.2781542 | 1130.559352 | -0.53148533  | 0.015660047 | 0.038878518 | SOAT1      |
| novel.1047      | 7.669891939 | 0.356539013 | 4.309502248  | 0.015670708 | 0.038901267 | -          |
| ENSG00000087087 | 1852.142812 | 2869.230873 | -0.631458612 | 0.01567285  | 0.038902867 | SRRT       |
| ENSG00000248124 | 84.56392718 | 14.36426492 | 2.551676895  | 0.015694728 | 0.038953451 | RRN3P1     |
| ENSG00000213600 | 2.139615324 | 12.18702883 | -2.510072688 | 0.015709019 | 0.038985196 | U73169.1   |
| ENSG00000286163 | 5.099746614 | 0           | 4.685460452  | 0.015729633 | 0.039032626 | AC002377.1 |
| ENSG00000287018 | 10.45275951 | 0           | 5.718926451  | 0.015746362 | 0.039070408 | AL161717.1 |
| ENSG00000089060 | 534.2385851 | 333.7088954 | 0.678602588  | 0.015751764 | 0.039080078 | SLC8B1     |
| ENSG00000225137 | 97.58965187 | 158.9192916 | -0.704546232 | 0.015754138 | 0.039082236 | DYNC112P1  |
| ENSG00000136960 | 766.6165487 | 316.2349562 | 1.277785777  | 0.015762218 | 0.039096744 | ENPP2      |
| ENSG00000176261 | 244.29099   | 387.6041954 | -0.666313334 | 0.01576357  | 0.039096744 | ZBTB8OS    |
| ENSG00000176953 | 702.5889328 | 1083.561486 | -0.624805057 | 0.015764501 | 0.039096744 | NFATC2IP   |
| ENSG00000231749 | 4.83548223  | 0           | 4.607674798  | 0.015766148 | 0.039097098 | ABCA9-AS1  |
| ENSG00000246640 | 5.686228309 | 22.22318361 | -1.959135464 | 0.015768685 | 0.039099657 | PICART1    |
| ENSG00000144357 | 1170.179407 | 678.3267242 | 0.786423536  | 0.015772783 | 0.039106086 | UBR3       |
| ENSG00000090534 | 11.04927039 | 0.672939833 | 3.982307017  | 0.015817563 | 0.039213368 | THPO       |
| ENSG00000287171 | 5.457208632 | 0           | 4.781721222  | 0.015840078 | 0.039265438 | AC006062.1 |
| ENSG00000122870 | 413.4378856 | 1549.082746 | -1.905763588 | 0.015851339 | 0.039289606 | BICC1      |
| ENSG00000187049 | 186.3391688 | 110.2674122 | 0.756038074  | 0.015861336 | 0.039310632 | TMEM216    |
| ENSG00000234498 | 3.077290793 | 17.54115018 | -2.52162778  | 0.015881124 | 0.039355921 | RPL13AP20  |
| ENSG00000276593 | 6.635257889 | 0.387220594 | 4.102745431  | 0.015942666 | 0.039504664 | AC022306.3 |
| ENSG00000270820 | 53.63469594 | 25.09800495 | 1.094863402  | 0.015945665 | 0.039508327 | AC016727.1 |
| ENSG00000104368 | 5276.23244  | 2083.562794 | 1.340352147  | 0.015948247 | 0.039510957 | PLAT       |
| ENSG00000254162 | 11.59889773 | 1.029478846 | 3.461683033  | 0.015954006 | 0.039521456 | AC009812.3 |
| ENSG00000118292 | 291.0619058 | 135.6569158 | 1.100943006  | 0.01596121  | 0.039535532 | C1orf54    |
| ENSG00000163607 | 113.9748544 | 215.147547  | -0.917700847 | 0.015970388 | 0.039554496 | GTPBP8     |
| ENSG00000172201 | 1178.459243 | 75.44828749 | 3.964753328  | 0.015972266 | 0.039555374 | ID4        |
| ENSG00000183814 | 81.72893239 | 164.7139528 | -1.012033037 | 0.015977649 | 0.039564935 | LIN9       |
| ENSG00000123575 | 1156.517536 | 771.0788091 | 0.585077331  | 0.015985717 | 0.039581142 | FAM199X    |
| ENSG00000220517 | 0.307102255 | 5.747074145 | -4.142163055 | 0.01599828  | 0.039608474 | ASS1P1     |
| ENSG00000214563 | 10.14816455 | 0           | 5.676223564  | 0.016005429 | 0.039622396 | GAPDHP15   |
| ENSG00000100034 | 2208.658493 | 1574.833194 | 0.487912822  | 0.016021543 | 0.039658509 | PPM1F      |
| ENSG00000278546 | 1.480065645 | 12.29811519 | -3.039758501 | 0.016033631 | 0.03968465  | AC003101.2 |
| ENSG00000071994 | 823.106757  | 1217.348697 | -0.564853805 | 0.0160359   | 0.039686485 | PDCD2      |
| ENSG00000236565 | 26.08173855 | 51.05779112 | -0.971222684 | 0.016048866 | 0.03971479  | HNRNPA3P5  |
| ENSG00000185973 | 103.5274655 | 158.6343431 | -0.615139671 | 0.016058365 | 0.039734513 | TMLHE      |
| ENSG00000122543 | 5.396748408 | 0           | 4.767049032  | 0.016072041 | 0.039764565 | OCM        |
| ENSG00000183935 | 52.28461102 | 124.2633698 | -1.250695817 | 0.016074418 | 0.039766658 | HTR7P1     |
| ENSG00000101280 | 10.71061311 | 0.672939833 | 3.936900368  | 0.016076081 | 0.039766988 | ANGPT4     |
| ENSG00000277128 | 4.866965991 | 0           | 4.616041299  | 0.016084081 | 0.039782989 | AL589743.4 |
| ENSG00000169756 | 1432.36089  | 2842.6149   | -0.9887398   | 0.016089107 | 0.039791631 | LIMS1      |

|                 |             |             |              |             |             |            |
|-----------------|-------------|-------------|--------------|-------------|-------------|------------|
| ENSG00000213064 | 1179.605891 | 789.2368745 | 0.579372077  | 0.016095092 | 0.039802645 | SFT2D2     |
| ENSG00000066654 | 1006.697251 | 701.7079739 | 0.520502516  | 0.016098731 | 0.039807854 | THUMPDI    |
| novel.531       | 35.61527132 | 71.45112501 | -1.004436355 | 0.016115283 | 0.039844992 | -          |
| ENSG00000139187 | 39.8658815  | 11.51306151 | 1.791795565  | 0.016117152 | 0.039845821 | KLRG1      |
| ENSG00000266104 | 0           | 4.666844622 | -4.803708564 | 0.016138227 | 0.039892156 | MIR4326    |
| ENSG00000172985 | 578.2649441 | 977.1516048 | -0.756684833 | 0.016138965 | 0.039892156 | SH3RF3     |
| ENSG00000149243 | 75.92679788 | 40.20346094 | 0.916811362  | 0.01615769  | 0.039934641 | KLHL35     |
| ENSG00000004975 | 826.6084239 | 1127.295477 | -0.447786325 | 0.016161561 | 0.039940409 | DVL2       |
| ENSG00000203667 | 34.50004739 | 12.42328166 | 1.470323824  | 0.01616757  | 0.039951458 | COX20      |
| ENSG00000197594 | 267.9597173 | 170.5698831 | 0.652586475  | 0.016175629 | 0.039967572 | ENPP1      |
| ENSG00000100410 | 448.7405032 | 666.1281029 | -0.570269115 | 0.016183064 | 0.039982139 | PHF5A      |
| ENSG00000158156 | 177.8728375 | 291.047441  | -0.709255561 | 0.016211484 | 0.040048546 | XKR8       |
| novel.902       | 10.38435011 | 0           | 5.710874851  | 0.016221506 | 0.040069496 | -          |
| ENSG00000120451 | 1296.40685  | 1774.154873 | -0.452729249 | 0.016227743 | 0.040081089 | SNX19      |
| ENSG00000181264 | 239.6355638 | 376.0638255 | -0.650162152 | 0.016230363 | 0.040083752 | TMEM136    |
| ENSG00000272564 | 4.822874471 | 0           | 4.604306215  | 0.016243366 | 0.040112053 | AC012511.1 |
| ENSG00000249465 | 12.4436603  | 2.934900236 | 2.100368978  | 0.016251112 | 0.040127365 | RBMXP4     |
| ENSG00000198945 | 172.5022301 | 271.1635401 | -0.652472562 | 0.016276097 | 0.040185239 | L3MBTL3    |
| ENSG00000279539 | 1.817398012 | 9.700840742 | -2.416457944 | 0.016281219 | 0.040194066 | AC006486.2 |
| ENSG00000184863 | 1530.580866 | 872.9848864 | 0.810297562  | 0.016304419 | 0.040247517 | RBM33      |
| ENSG00000172640 | 7.096986917 | 0           | 5.162745489  | 0.01630672  | 0.040249373 | OR10AD1    |
| ENSG00000089053 | 2216.862418 | 3068.76437  | -0.469122279 | 0.016346041 | 0.040342593 | ANAPC5     |
| ENSG00000187730 | 11.84553976 | 0.672939833 | 4.088164136  | 0.016354633 | 0.040359967 | GABRD      |
| ENSG00000182583 | 7.667099907 | 0           | 5.274177297  | 0.0163734   | 0.040402441 | VCX        |
| ENSG00000169306 | 48.62249162 | 11.58490877 | 2.079175383  | 0.0163761   | 0.040405266 | IL1RAPL1   |
| ENSG00000271752 | 6.262609543 | 0           | 4.98193381   | 0.016380093 | 0.04041128  | AC112187.3 |
| ENSG00000137869 | 131.0293077 | 50.04196002 | 1.392529065  | 0.016382597 | 0.04041362  | CYP19A1    |
| ENSG00000274471 | 86.90200389 | 36.03607914 | 1.269534908  | 0.016384882 | 0.040415421 | AC242376.2 |
| ENSG00000287616 | 10.42091974 | 0.713078025 | 3.864395747  | 0.016390477 | 0.040425382 | AL357522.1 |
| ENSG00000112357 | 96.5488205  | 153.8414329 | -0.672935824 | 0.016394374 | 0.040431157 | PEX7       |
| ENSG00000076053 | 324.4531408 | 512.5620682 | -0.659749547 | 0.016402103 | 0.040446377 | RBM7       |
| ENSG00000264673 | 0.307102255 | 10.53536082 | -5.013395118 | 0.016406012 | 0.040452179 | AC098850.1 |
| ENSG00000186472 | 3.033199274 | 12.43273827 | -2.039768769 | 0.016414115 | 0.040468317 | PCLO       |
| ENSG00000166268 | 6.068905845 | 0.336469917 | 3.972918753  | 0.016459461 | 0.040576264 | MYRFL      |
| ENSG00000230303 | 9.952851197 | 1.365948763 | 2.824368288  | 0.016474163 | 0.040605988 | AL353743.2 |
| ENSG00000120669 | 2.420248412 | 11.58734891 | -2.256332268 | 0.016474644 | 0.040605988 | SOHLH2     |
| ENSG00000121931 | 131.2697524 | 262.1173211 | -0.997524801 | 0.016476261 | 0.040606121 | LRIF1      |
| ENSG00000102978 | 1066.896414 | 1488.125016 | -0.480193424 | 0.016485463 | 0.040624948 | POLR2C     |
| novel.739       | 1.835020366 | 17.05597707 | -3.222160706 | 0.016509013 | 0.040677504 | -          |
| ENSG00000213062 | 45.58359357 | 20.84906251 | 1.128319892  | 0.016509922 | 0.040677504 | Z99572.1   |
| ENSG00000287609 | 0.308355904 | 7.060987961 | -4.434324469 | 0.016530077 | 0.0407233   | AL589787.2 |
| ENSG00000181541 | 0           | 9.501434051 | -5.832109687 | 0.016535574 | 0.040731415 | MAB21L2    |
| ENSG00000141456 | 848.1527657 | 1224.264659 | -0.52958853  | 0.016536506 | 0.040731415 | PELP1      |
| ENSG00000196151 | 199.0603145 | 127.2687046 | 0.645875383  | 0.01655145  | 0.040764359 | WDSUB1     |
| ENSG00000065883 | 1240.028993 | 832.7813911 | 0.574609071  | 0.016561767 | 0.040785902 | CDK13      |
| ENSG00000171928 | 598.5079487 | 968.0348103 | -0.693466389 | 0.016564703 | 0.040789267 | TVP23B     |
| ENSG00000154928 | 17.61898219 | 58.55020061 | -1.730340792 | 0.016574903 | 0.040810515 | EPHB1      |
| ENSG00000160392 | 179.0501317 | 275.2840712 | -0.620547571 | 0.016578452 | 0.040815385 | C19orf47   |
| ENSG00000021762 | 929.0468337 | 1411.295005 | -0.603088814 | 0.016589195 | 0.040837965 | OSBPL5     |
| novel.234       | 21.79366109 | 7.785962742 | 1.476173349  | 0.016595512 | 0.040849643 | -          |
| ENSG00000250132 | 67.38721294 | 31.15317918 | 1.112614399  | 0.016605582 | 0.040870559 | AC004803.1 |

|                 |             |             |              |             |             |              |
|-----------------|-------------|-------------|--------------|-------------|-------------|--------------|
| ENSG00000157379 | 87.91485555 | 29.24403338 | 1.590964597  | 0.01660843  | 0.040873697 | DHRS1        |
| ENSG00000168461 | 10181.84277 | 4962.461324 | 1.03692416   | 0.016622578 | 0.040904642 | RAB31        |
| ENSG00000215283 | 10.58217076 | 2.129777466 | 2.303765669  | 0.016645079 | 0.040956133 | HMGB3P24     |
| ENSG00000232233 | 0.308355904 | 7.216964408 | -4.47672414  | 0.016651264 | 0.040967471 | LINC02043    |
| ENSG00000234771 | 179.2876852 | 88.34256811 | 1.022708685  | 0.016664126 | 0.040995232 | SLC25A25-AS1 |
| ENSG00000280649 | 45.65282934 | 17.58933232 | 1.382546361  | 0.016685983 | 0.041045118 | AC245100.8   |
| ENSG00000248049 | 171.5561785 | 106.5909357 | 0.68696192   | 0.016699242 | 0.041073842 | UBA6-AS1     |
| ENSG00000226102 | 2.109385211 | 21.58362229 | -3.355155137 | 0.01670341  | 0.041080207 | SEPT7P3      |
| ENSG00000163519 | 10.78493474 | 0           | 5.764014006  | 0.016706686 | 0.041084375 | TRAT1        |
| ENSG00000167861 | 64.22599825 | 24.60787034 | 1.389189023  | 0.016715479 | 0.041102107 | HID1         |
| ENSG00000181467 | 871.0194807 | 606.7690083 | 0.521194466  | 0.016718193 | 0.041104889 | RAP2B        |
| ENSG00000253293 | 3.992329314 | 161.1144263 | -5.336050951 | 0.01672107  | 0.041108074 | HOXA10       |
| ENSG00000242902 | 1.232169966 | 9.894386842 | -3.014055599 | 0.016729786 | 0.041125609 | FLNC-AS1     |
| ENSG00000184260 | 12.00553713 | 31.97824265 | -1.407238968 | 0.016731798 | 0.041126664 | HIST2H2AC    |
| ENSG00000241155 | 22.98299319 | 8.600542122 | 1.417252319  | 0.016739573 | 0.04114055  | ARHGAP31-AS1 |
| ENSG00000174521 | 7.186423605 | 0.387220594 | 4.218741999  | 0.016740614 | 0.04114055  | TTC9B        |
| ENSG00000153956 | 244.3736599 | 469.7588105 | -0.943473296 | 0.01674407  | 0.041145151 | CACNA2D1     |
| ENSG00000230387 | 0.308355904 | 10.56604241 | -5.01743835  | 0.016756002 | 0.041170459 | AL118508.1   |
| ENSG00000236977 | 5.659759143 | 0           | 4.836313501  | 0.016757538 | 0.041170459 | ANKRD44-IT1  |
| ENSG00000269982 | 81.5042153  | 39.45957294 | 1.049710811  | 0.016782089 | 0.041226878 | AC018809.2   |
| ENSG00000273464 | 11.1800657  | 1.844058227 | 2.620669006  | 0.01679725  | 0.041260221 | AP000238.1   |
| ENSG00000260727 | 2.406387005 | 14.05488056 | -2.546098117 | 0.016809104 | 0.041285434 | SLC7A5P1     |
| ENSG00000205885 | 38.2988152  | 83.64439961 | -1.128845978 | 0.01681915  | 0.041306205 | C1RL-AS1     |
| ENSG00000156273 | 1283.787438 | 765.3641678 | 0.746545638  | 0.016825607 | 0.041318156 | BACH1        |
| ENSG00000268006 | 30.51684962 | 13.20717946 | 1.205640475  | 0.016837203 | 0.041342724 | PTOV1-AS1    |
| ENSG00000243642 | 6.582319557 | 0.336469917 | 4.092510581  | 0.016873541 | 0.041428034 | RN7SL526P    |
| ENSG00000166347 | 914.324761  | 579.6954857 | 0.6574009    | 0.016893058 | 0.041468209 | CYB5A        |
| novel.808       | 9.658356701 | 1.773238453 | 2.435741638  | 0.016893096 | 0.041468209 | -            |
| ENSG00000092847 | 950.8100678 | 653.6869567 | 0.540755056  | 0.016897062 | 0.041474026 | AGO1         |
| ENSG00000109667 | 123.3828078 | 47.42427815 | 1.375477342  | 0.016908187 | 0.041497412 | SLC2A9       |
| ENSG00000176716 | 10.92548664 | 0           | 5.784258631  | 0.016913761 | 0.041505361 | OR10AB1P     |
| ENSG00000285684 | 12.14798342 | 0.774441189 | 4.029013012  | 0.016914621 | 0.041505361 | AL137781.1   |
| ENSG00000245680 | 294.839307  | 190.8911129 | 0.628552071  | 0.01694685  | 0.041580518 | ZNF585B      |
| ENSG00000197826 | 0           | 4.809640044 | -4.842337998 | 0.01695797  | 0.041603874 | CFAP299      |
| ENSG00000225331 | 6.401223617 | 0.387220594 | 4.049099321  | 0.016974135 | 0.041637203 | LINC01678    |
| ENSG00000241081 | 6.38736221  | 23.69166121 | -1.887895331 | 0.01697476  | 0.041637203 | RPL22P2      |
| ENSG00000230084 | 68.88601204 | 28.36706335 | 1.280081087  | 0.016984347 | 0.041656442 | AC006059.1   |
| ENSG00000158092 | 688.0049849 | 473.7310115 | 0.538425416  | 0.016985811 | 0.041656442 | NCK1         |
| ENSG00000175793 | 1.186824798 | 9.498993907 | -2.98960576  | 0.016995178 | 0.04167548  | SFN          |
| ENSG00000280088 | 119.7930726 | 70.69662452 | 0.761375782  | 0.016999791 | 0.041682859 | AC126474.2   |
| ENSG00000124198 | 730.2692486 | 1046.030858 | -0.518193909 | 0.017016105 | 0.041718923 | ARFGEF2      |
| ENSG00000241484 | 5.501300152 | 0           | 4.792392393  | 0.017031628 | 0.041752883 | ARHGAP8      |
| ENSG00000230107 | 5.184168707 | 0           | 4.706903466  | 0.01703317  | 0.041752883 | AL022316.1   |
| ENSG00000101945 | 148.5151611 | 254.5527732 | -0.778027085 | 0.017036175 | 0.041756307 | SUV39H1      |
| ENSG00000107854 | 1557.916353 | 1109.189413 | 0.490163694  | 0.017038686 | 0.041758522 | TNKS2        |
| ENSG00000108064 | 464.7182396 | 678.5478226 | -0.546390938 | 0.017044557 | 0.041768971 | TFAM         |
| ENSG00000265148 | 12.39330053 | 1.813376645 | 2.77956514   | 0.017047306 | 0.041771768 | TSPOAP1-AS1  |
| ENSG00000233070 | 9.655778133 | 0           | 5.605261424  | 0.017068144 | 0.041815023 | ZFY-AS1      |
| ENSG00000243811 | 11.09934542 | 1.793307549 | 2.630581163  | 0.017068177 | 0.041815023 | APOBEC3D     |
| ENSG00000033867 | 790.6916772 | 1332.724281 | -0.752986228 | 0.017075908 | 0.041830018 | SLC4A7       |
| ENSG00000108107 | 9373.752688 | 14975.06031 | -0.675865824 | 0.017086445 | 0.041851883 | RPL28        |



|                 |             |             |              |             |             |            |
|-----------------|-------------|-------------|--------------|-------------|-------------|------------|
| ENSG00000254966 | 10.87917256 | 2.129777466 | 2.344086858  | 0.017096145 | 0.041871695 | AC103974.1 |
| ENSG00000288002 | 6.370993505 | 0.356539013 | 4.043102559  | 0.017110874 | 0.041903819 | AC091912.3 |
| ENSG00000179954 | 289.5254423 | 481.8734192 | -0.73422438  | 0.017113613 | 0.041906577 | SSC5D      |
| ENSG00000117335 | 4068.302781 | 2393.927498 | 0.76506458   | 0.017125725 | 0.041932283 | CD46       |
| ENSG00000198865 | 191.8000397 | 66.81436685 | 1.518598819  | 0.017159682 | 0.042011469 | CCDC152    |
| ENSG00000173825 | 12.54069015 | 2.140389951 | 2.544988707  | 0.017175335 | 0.042044646 | TIGD3      |
| ENSG00000256576 | 38.73192377 | 11.53531396 | 1.75834136   | 0.017176561 | 0.042044646 | LINC02361  |
| ENSG00000104059 | 10.03970932 | 0           | 5.66116403   | 0.017178089 | 0.042044646 | FAM189A1   |
| ENSG00000243232 | 7.361536035 | 0.356539013 | 4.250265471  | 0.017182453 | 0.042048621 | PCDHAC2    |
| ENSG00000111670 | 1038.025897 | 749.2024639 | 0.470302683  | 0.017182949 | 0.042048621 | GNPTAB     |
| ENSG00000155749 | 20.4027474  | 5.828506405 | 1.817233306  | 0.017185174 | 0.042050105 | FLACC1     |
| ENSG00000269068 | 11.12964681 | 1.029478846 | 3.400544147  | 0.017192265 | 0.042063494 | AC009955.4 |
| ENSG00000240207 | 43.36457075 | 19.85270539 | 1.121305479  | 0.017198615 | 0.042075067 | AC080013.1 |
| ENSG00000251073 | 5.937884934 | 0           | 4.905692219  | 0.01720332  | 0.042082614 | NUDT19P5   |
| ENSG00000167395 | 449.6038136 | 646.3102103 | -0.52338819  | 0.017238949 | 0.042165802 | ZNF646     |
| ENSG00000277481 | 6.301686468 | 0.356539013 | 4.029292814  | 0.017242015 | 0.04216933  | PKD1L3     |
| ENSG00000260927 | 20.74641928 | 4.503851709 | 2.22593466   | 0.017248993 | 0.042182426 | AC009107.2 |
| ENSG00000269834 | 171.8193315 | 105.0017396 | 0.712518244  | 0.01725099  | 0.042183339 | ZNF528-AS1 |
| ENSG00000198929 | 16.27223129 | 3.546476906 | 2.191476016  | 0.0172564   | 0.042192595 | NOS1AP     |
| ENSG00000112695 | 1529.177678 | 2300.593864 | -0.589287428 | 0.017278555 | 0.04224279  | COX7A2     |
| ENSG00000203724 | 15.27939492 | 46.57991628 | -1.61215599  | 0.01728924  | 0.042264936 | C1orf53    |
| ENSG00000267248 | 11.19386798 | 28.37040258 | -1.337757254 | 0.017327127 | 0.042353568 | AC025048.2 |
| ENSG00000164056 | 674.3139495 | 236.0987528 | 1.513434208  | 0.017379069 | 0.042476537 | SPRY1      |
| ENSG00000184743 | 1580.531439 | 2301.858032 | -0.542545101 | 0.017405183 | 0.042536361 | ATL3       |
| ENSG00000201700 | 1.214547612 | 12.09382821 | -3.315172942 | 0.017412943 | 0.042551324 | SNORD113-3 |
| ENSG00000225762 | 12.09748112 | 2.241891306 | 2.461373232  | 0.017429623 | 0.042588079 | LINC01389  |
| ENSG00000259256 | 5.085885207 | 0           | 4.681848449  | 0.017443772 | 0.042618643 | LINC01895  |
| ENSG00000148331 | 604.4942433 | 974.8001938 | -0.689538247 | 0.017446176 | 0.042620507 | ASB6       |
| ENSG00000109270 | 775.087088  | 541.9469361 | 0.515791251  | 0.0174842   | 0.042709383 | LAMTOR3    |
| ENSG00000146802 | 973.0426384 | 566.9481444 | 0.779236412  | 0.017490071 | 0.042719708 | TMEM168    |
| ENSG00000257815 | 45.74219511 | 16.74175961 | 1.454375457  | 0.017504137 | 0.042750046 | AC025159.1 |
| ENSG00000143819 | 1363.45132  | 534.9883486 | 1.349584944  | 0.017527049 | 0.042801978 | EPHX1      |
| ENSG00000162139 | 197.6441853 | 305.6634512 | -0.629577616 | 0.017557581 | 0.042866559 | NEU3       |
| novel.1035      | 121.6947356 | 15.44650222 | 2.981960173  | 0.017558303 | 0.042866559 | -          |
| ENSG00000177455 | 19.2879504  | 2.475703993 | 2.953088278  | 0.017558896 | 0.042866559 | CD19       |
| ENSG00000162616 | 775.8326527 | 1520.051809 | -0.970530271 | 0.017560093 | 0.042866559 | DNAJB4     |
| ENSG00000171476 | 66.55870436 | 14.20011613 | 2.22442875   | 0.017575218 | 0.042898961 | HOPX       |
| ENSG00000167549 | 279.9115755 | 127.7005113 | 1.133087026  | 0.017576669 | 0.042898961 | CORO6      |
| ENSG00000243243 | 0.922560414 | 8.102363562 | -3.151998516 | 0.017594524 | 0.042936127 | AC073130.2 |
| ENSG00000059588 | 1311.42267  | 717.661563  | 0.869564758  | 0.017595202 | 0.042936127 | TARBP1     |
| ENSG00000102935 | 200.4808006 | 36.93838374 | 2.437958954  | 0.017597682 | 0.042938145 | ZNF423     |
| ENSG00000149926 | 1.495180701 | 9.305319412 | -2.628842035 | 0.0176025   | 0.042945869 | FAM57B     |
| ENSG00000250510 | 160.2456764 | 55.61226511 | 1.527069366  | 0.017622606 | 0.042990885 | GPR162     |
| ENSG00000254858 | 201.8305736 | 361.4001596 | -0.840711469 | 0.017628025 | 0.042999861 | MPV17L2    |
| ENSG00000248866 | 56.57372866 | 24.40743617 | 1.207445908  | 0.017629596 | 0.042999861 | USP46-AS1  |
| ENSG00000115966 | 994.1891126 | 700.0561647 | 0.506369496  | 0.017645741 | 0.043035201 | ATF2       |
| ENSG00000021355 | 992.5767706 | 648.6524602 | 0.613836747  | 0.017667037 | 0.043083095 | SERPINB1   |
| ENSG00000160917 | 548.5668993 | 805.1420126 | -0.553675412 | 0.017671836 | 0.043090753 | CPSF4      |
| ENSG00000163666 | 32.2072724  | 13.71712638 | 1.233639358  | 0.017678941 | 0.043104033 | HESX1      |
| ENSG00000283345 | 4.807759415 | 0           | 4.600225016  | 0.017687434 | 0.043120693 | AC127502.3 |
| ENSG00000106100 | 382.3896646 | 166.9148068 | 1.195246998  | 0.017692222 | 0.043128319 | NOD1       |

|                 |             |             |              |             |             |            |
|-----------------|-------------|-------------|--------------|-------------|-------------|------------|
| ENSG00000276136 | 13.94134829 | 2.772035718 | 2.306447585  | 0.017699175 | 0.043141219 | AC016957.2 |
| ENSG00000165526 | 377.0650709 | 569.5037396 | -0.594834709 | 0.017705685 | 0.043153039 | RPUSD4     |
| ENSG00000118965 | 534.0856834 | 362.2591492 | 0.559686685  | 0.017724676 | 0.043193771 | WDR35      |
| ENSG00000130844 | 422.0638356 | 272.4703091 | 0.632190935  | 0.017725722 | 0.043193771 | ZNF331     |
| ENSG00000096654 | 134.8310535 | 80.24662589 | 0.745709235  | 0.017742533 | 0.043230682 | ZNF184     |
| ENSG00000220494 | 0.307102255 | 6.644370055 | -4.355721523 | 0.017764989 | 0.043281337 | YAP1P1     |
| ENSG00000224361 | 4.839243176 | 0           | 4.60866139   | 0.017767177 | 0.043282608 | AC011239.1 |
| ENSG00000171792 | 313.144735  | 512.9234529 | -0.71252111  | 0.01777001  | 0.043285453 | RHNO1      |
| ENSG00000100439 | 901.6821096 | 586.2932146 | 0.620681484  | 0.017777728 | 0.043300193 | ABHD4      |
| ENSG00000236155 | 13.73886905 | 2.058957692 | 2.708152231  | 0.017780048 | 0.043301785 | AL355877.1 |
| ENSG00000178585 | 515.0986661 | 344.9991891 | 0.577444933  | 0.017786216 | 0.043312745 | CTNNBIP1   |
| ENSG00000117013 | 17.61138903 | 4.718751175 | 1.906542474  | 0.017788264 | 0.043313674 | KCNQ4      |
| ENSG00000287042 | 12.37686056 | 2.241891306 | 2.493853047  | 0.017791187 | 0.043314003 | AC090945.1 |
| ENSG00000183688 | 8.297957856 | 34.27448066 | -2.049816306 | 0.017791734 | 0.043314003 | RFLNB      |
| ENSG00000184206 | 9.99443542  | 1.069617038 | 3.217490736  | 0.017793583 | 0.043314445 | GOLGA6L4   |
| ENSG00000260773 | 11.74127275 | 1.762625967 | 2.722898758  | 0.017817684 | 0.04336905  | AC055855.1 |
| ENSG00000170006 | 133.1012691 | 209.1482949 | -0.652016424 | 0.017844776 | 0.043430925 | TMEM154    |
| ENSG00000186838 | 6.442736568 | 0           | 5.020255365  | 0.017874548 | 0.043499311 | SELENOV    |
| ENSG00000286348 | 9.801700636 | 0           | 5.62757028   | 0.017888767 | 0.043529836 | AC084834.1 |
| ENSG00000196865 | 890.2078824 | 581.842635  | 0.613320542  | 0.017904874 | 0.043561128 | NHLRC2     |
| ENSG00000187013 | 41.84048486 | 19.87277448 | 1.068251947  | 0.01790498  | 0.043561128 | C17orf82   |
| ENSG00000226306 | 6.075174089 | 0           | 4.936335753  | 0.017937234 | 0.043635513 | NPY6R      |
| ENSG00000163053 | 98.84216461 | 34.99025562 | 1.493986529  | 0.017961749 | 0.043691059 | SLC16A14   |
| ENSG00000115841 | 110.6616625 | 46.87393625 | 1.235922354  | 0.017985955 | 0.043745843 | RMDN2      |
| ENSG00000129566 | 1163.080354 | 757.5405195 | 0.618661934  | 0.018005349 | 0.043788915 | TEP1       |
| ENSG00000111364 | 412.5328379 | 575.6761176 | -0.48106125  | 0.0180131   | 0.043803664 | DDX55      |
| ENSG00000165502 | 2075.389605 | 2945.726526 | -0.505311956 | 0.018019005 | 0.043813922 | RPL36AL    |
| ENSG00000163032 | 34.40881506 | 6.64552593  | 2.363801762  | 0.018030003 | 0.043836563 | VSNL1      |
| ENSG00000205730 | 1256.685649 | 1889.621574 | -0.588493953 | 0.018040632 | 0.043856575 | ITPR1P2    |
| ENSG00000163191 | 5199.428188 | 8009.994333 | -0.623445981 | 0.018042995 | 0.043856575 | S100A11    |
| ENSG00000181418 | 2.728604316 | 12.7785364  | -2.224312912 | 0.018043298 | 0.043856575 | DDN        |
| ENSG00000058729 | 375.0103321 | 582.5498996 | -0.636021426 | 0.018046439 | 0.043860107 | RIOK2      |
| ENSG00000135723 | 960.0735234 | 1424.58014  | -0.569440146 | 0.018054241 | 0.043874962 | FHOD1      |
| ENSG00000164761 | 161.7285778 | 373.4224664 | -1.206783854 | 0.018104069 | 0.04399194  | TNFRSF11B  |
| ENSG00000132323 | 792.8217076 | 487.4311168 | 0.701699698  | 0.018131418 | 0.044054275 | ILKAP      |
| ENSG00000154429 | 385.2461537 | 248.0451968 | 0.636301091  | 0.018141126 | 0.044073741 | CCSAP      |
| ENSG00000211666 | 7.382919335 | 0           | 5.216840318  | 0.018145409 | 0.044080026 | IGLV2-14   |
| ENSG00000100095 | 10.33803603 | 1.00940975  | 3.304425449  | 0.018156014 | 0.044101663 | SEZ6L      |
| ENSG00000112110 | 796.9407661 | 1177.650161 | -0.563642671 | 0.018168786 | 0.044128562 | MRPL18     |
| ENSG00000233913 | 249.683052  | 359.8655669 | -0.527570782 | 0.018181021 | 0.044154152 | RPL10P9    |
| ENSG00000198937 | 150.5502525 | 260.045452  | -0.789451766 | 0.018187862 | 0.044163685 | CCDC167    |
| ENSG00000186480 | 894.7754663 | 2030.4848   | -1.182099847 | 0.018188556 | 0.044163685 | INSIG1     |
| ENSG00000178662 | 60.85589388 | 18.62022383 | 1.703345647  | 0.018190046 | 0.044163685 | CSRNP3     |
| ENSG00000140199 | 572.3867487 | 383.2465592 | 0.578065738  | 0.018191896 | 0.044164048 | SLC12A6    |
| ENSG00000112812 | 1.830005771 | 13.11487792 | -2.839283562 | 0.018223501 | 0.044236643 | PRSS16     |
| ENSG00000104783 | 50.79136815 | 98.36554187 | -0.951197865 | 0.01825745  | 0.044314911 | KCNN4      |
| ENSG00000270433 | 6.335677526 | 0.356539013 | 4.03604459   | 0.018277754 | 0.04436005  | H3F3AP2    |
| ENSG00000157426 | 203.6113315 | 294.3984924 | -0.531403673 | 0.018279487 | 0.04436011  | AASDH      |
| ENSG00000112033 | 1208.149366 | 2341.855984 | -0.954703994 | 0.018284465 | 0.044368048 | PPARD      |
| ENSG00000198839 | 213.622705  | 376.5112878 | -0.817039738 | 0.018286587 | 0.044369053 | ZNF277     |
| ENSG00000276832 | 6.09662866  | 0.336469917 | 3.97866912   | 0.018290166 | 0.044373592 | AL354718.3 |

|                 |             |             |              |             |             |            |
|-----------------|-------------|-------------|--------------|-------------|-------------|------------|
| ENSG00000287021 | 5.200537412 | 0           | 4.711088027  | 0.018296106 | 0.044383859 | AC097462.3 |
| ENSG00000233093 | 6.455344327 | 0           | 5.022927242  | 0.018306195 | 0.044404189 | LINC00892  |
| ENSG00000261363 | 7.362789684 | 0.336469917 | 4.250544875  | 0.018309379 | 0.044407765 | AC106745.1 |
| ENSG00000183011 | 913.074424  | 1452.274825 | -0.669645466 | 0.018312128 | 0.044410285 | NAA38      |
| ENSG00000159596 | 276.2097952 | 433.9607355 | -0.651985673 | 0.01833455  | 0.044451499 | TMEM69     |
| ENSG00000155115 | 604.6735284 | 1025.701555 | -0.762702901 | 0.018336003 | 0.044451499 | GTF3C6     |
| ENSG00000267774 | 0           | 5.270120557 | -4.981604122 | 0.01833656  | 0.044451499 | AC010776.2 |
| ENSG00000287063 | 6.420099619 | 0.336469917 | 4.052907995  | 0.018337523 | 0.044451499 | AL356489.3 |
| ENSG00000157111 | 33.52798142 | 155.0977552 | -2.210825879 | 0.018337676 | 0.044451499 | TMEM171    |
| ENSG00000113073 | 9.665949865 | 1.10029862  | 3.152723576  | 0.01834209  | 0.044456689 | SLC4A9     |
| ENSG00000260830 | 4.882081047 | 0           | 4.620120241  | 0.01834324  | 0.044456689 | AL135744.1 |
| ENSG00000106459 | 384.5280816 | 256.0408876 | 0.586461261  | 0.018356677 | 0.044485106 | NRF1       |
| ENSG00000105248 | 470.2952579 | 322.460585  | 0.543755271  | 0.018367646 | 0.044507538 | YJU2       |
| ENSG00000244274 | 25.61714622 | 7.644323194 | 1.730288234  | 0.01837176  | 0.044513353 | DBNDD2     |
| novel.507       | 38.86022392 | 81.83418662 | -1.073901266 | 0.018381625 | 0.044533104 | -          |
| ENSG00000134874 | 786.6637329 | 1125.317122 | -0.516421262 | 0.018387264 | 0.044542612 | DZIP1      |
| ENSG00000270344 | 47.66880345 | 20.42054784 | 1.222690702  | 0.018392983 | 0.044552312 | POC1B-AS1  |
| ENSG00000115041 | 72.22555812 | 148.2378777 | -1.03722463  | 0.018402551 | 0.04456896  | KCNIP3     |
| ENSG00000170191 | 122.7447127 | 201.3005838 | -0.713670765 | 0.018403287 | 0.04456896  | NANP       |
| ENSG00000205482 | 13.2515685  | 3.169868797 | 2.051539154  | 0.018422146 | 0.044610473 | SPDYE18    |
| ENSG00000130958 | 225.1367538 | 147.1497798 | 0.613769464  | 0.018427508 | 0.0446193   | SLC35D2    |
| ENSG00000265015 | 5.963100452 | 0           | 4.911311084  | 0.018432575 | 0.044619396 | AP005901.3 |
| ENSG00000257848 | 5.963100452 | 0           | 4.911311084  | 0.018432575 | 0.044619396 | AC074029.1 |
| ENSG00000164199 | 21.22634013 | 2.884149558 | 2.880681277  | 0.0184327   | 0.044619396 | ADGRV1     |
| ENSG00000185149 | 0           | 8.532162493 | -5.676957283 | 0.018437459 | 0.044626759 | NPY2R      |
| ENSG00000131238 | 3353.259148 | 2321.274003 | 0.53051352   | 0.018444429 | 0.044639471 | PPT1       |
| ENSG00000182446 | 2007.899996 | 2703.444452 | -0.429051515 | 0.018451317 | 0.044651982 | NPLOC4     |
| ENSG00000144635 | 641.8967813 | 977.7656472 | -0.607437714 | 0.018456676 | 0.04466079  | DYNC1L1    |
| ENSG00000108852 | 90.22743131 | 328.8304653 | -1.865616964 | 0.018465877 | 0.044671267 | MPP2       |
| ENSG00000253616 | 0           | 4.351599676 | -4.700772235 | 0.018466164 | 0.044671267 | AC107959.3 |
| ENSG00000237289 | 0           | 4.351599676 | -4.700772235 | 0.018466164 | 0.044671267 | CKMT1B     |
| ENSG00000005700 | 84.02353014 | 176.9968664 | -1.07469149  | 0.018476653 | 0.0446885   | IBTK       |
| novel.1076      | 34.99536803 | 7.735212064 | 2.17039354   | 0.018476728 | 0.0446885   | -          |
| ENSG00000230630 | 124.0347918 | 392.641098  | -1.662899713 | 0.018481051 | 0.044694796 | DNM3OS     |
| ENSG00000096433 | 3737.367067 | 2003.143995 | 0.899880787  | 0.01848635  | 0.044703449 | ITPR3      |
| novel.149       | 5.487438745 | 0           | 4.789073713  | 0.018492346 | 0.044713788 | -          |
| ENSG00000275765 | 56.39073833 | 19.85398966 | 1.498664938  | 0.018497393 | 0.044718318 | AC091982.3 |
| ENSG00000267623 | 4.848089989 | 0           | 4.611037983  | 0.018497662 | 0.044718318 | AC005357.2 |
| ENSG00000164438 | 8.309240695 | 0           | 5.387545275  | 0.018510503 | 0.044745196 | TLX3       |
| ENSG00000117597 | 353.6871047 | 602.2245513 | -0.768410433 | 0.018515644 | 0.044749775 | UTP25      |
| ENSG00000175110 | 439.5968851 | 629.8962946 | -0.519047824 | 0.018515841 | 0.044749775 | MRPS22     |
| novel.354       | 28.20874612 | 10.97705651 | 1.354345354  | 0.018560389 | 0.044853267 | -          |
| ENSG00000256433 | 38.39061699 | 14.79979604 | 1.368356777  | 0.018564588 | 0.04485924  | AC005840.3 |
| ENSG00000254847 | 6.056298086 | 0.356539013 | 3.970339519  | 0.018577366 | 0.044881843 | AC009806.1 |
| ENSG00000223393 | 6.314294226 | 0.336469917 | 4.031759165  | 0.018580366 | 0.044881843 | AL118511.1 |
| ENSG00000257885 | 5.140077187 | 0           | 4.695699369  | 0.018580851 | 0.044881843 | PHBP18     |
| ENSG00000277521 | 5.140077187 | 0           | 4.695699369  | 0.018580851 | 0.044881843 | MIR8078    |
| ENSG00000277737 | 9.3261102   | 0           | 5.555288258  | 0.018592368 | 0.044905485 | FP325317.1 |
| ENSG00000260645 | 37.44660201 | 16.00031175 | 1.233290451  | 0.018609612 | 0.044942957 | AL359715.2 |
| ENSG00000164331 | 484.1669428 | 309.3652969 | 0.647211151  | 0.018611962 | 0.044944455 | ANKRA2     |
| ENSG00000164713 | 1780.180742 | 2730.470769 | -0.617042101 | 0.018616453 | 0.04495112  | BRI3       |

|                 |             |             |              |             |             |            |
|-----------------|-------------|-------------|--------------|-------------|-------------|------------|
| ENSG00000272009 | 9.093258306 | 1.060160428 | 3.087503774  | 0.018619512 | 0.04495433  | AL121944.1 |
| ENSG00000198863 | 324.5397576 | 486.3045717 | -0.582783455 | 0.018627339 | 0.044969047 | RUNDC1     |
| ENSG00000141338 | 5693.251819 | 412.6249838 | 3.786233779  | 0.018630977 | 0.044973652 | ABCA8      |
| novel.824       | 0           | 97.75094275 | -9.192155631 | 0.018658001 | 0.045034702 | -          |
| ENSG00000135835 | 274.0046772 | 142.4414655 | 0.944812479  | 0.018660346 | 0.045036179 | KIAA1614   |
| ENSG00000250215 | 4.806505766 | 0           | 4.599860109  | 0.018688832 | 0.045100737 | CIR1P2     |
| ENSG00000259972 | 155.3945538 | 86.21381812 | 0.852790222  | 0.018699113 | 0.045121357 | AC009120.2 |
| ENSG00000230928 | 13.01850315 | 1.436768536 | 3.182285069  | 0.018731524 | 0.045195367 | AL139241.1 |
| ENSG00000151445 | 362.2595696 | 547.7256253 | -0.596397914 | 0.018739297 | 0.045209924 | VIPAS39    |
| ENSG00000196091 | 5.833617924 | 0           | 4.876706928  | 0.01875099  | 0.045231603 | MYBPC1     |
| ENSG00000287140 | 5.10350756  | 0           | 4.686320683  | 0.018752548 | 0.045231603 | AC066595.2 |
| ENSG00000225163 | 0           | 4.300848999 | -4.685969663 | 0.018753506 | 0.045231603 | LINC00618  |
| ENSG00000251361 | 35.34828617 | 8.26651235  | 2.084386925  | 0.01875772  | 0.045237568 | AC012625.1 |
| ENSG00000228971 | 5.098492965 | 0           | 4.685037652  | 0.018776235 | 0.045278018 | LINC02607  |
| ENSG00000229939 | 5.462294498 | 18.22110648 | -1.740460953 | 0.018786762 | 0.045295436 | AL589880.1 |
| ENSG00000273363 | 8.97993102  | 0.723690511 | 3.642708866  | 0.018786945 | 0.045295436 | AL353801.3 |
| ENSG00000111684 | 75.03794379 | 134.5628629 | -0.843553324 | 0.018806461 | 0.045338281 | LPCAT3     |
| ENSG00000259438 | 0           | 4.290236513 | -4.682988259 | 0.018814716 | 0.045353976 | MAPK6-DT   |
| ENSG00000124145 | 2136.589835 | 3985.635935 | -0.899405008 | 0.0188231   | 0.045369975 | SDC4       |
| ENSG00000141219 | 437.2728833 | 299.1474113 | 0.547478594  | 0.01882655  | 0.045371693 | C17orf80   |
| ENSG00000196569 | 4711.560132 | 1202.826693 | 1.969667622  | 0.018827306 | 0.045371693 | LAMA2      |
| ENSG00000183690 | 30.25892475 | 11.8506873  | 1.352531627  | 0.018831811 | 0.045378342 | EFHC2      |
| ENSG00000141098 | 344.4777705 | 505.06974   | -0.551845041 | 0.018838049 | 0.045387733 | GFOD2      |
| ENSG00000165029 | 2722.899348 | 1006.662509 | 1.435746599  | 0.018839202 | 0.045387733 | ABCA1      |
| ENSG00000084073 | 761.921108  | 1214.06885  | -0.672437733 | 0.018842087 | 0.045390473 | ZMPSTE24   |
| ENSG00000006451 | 1122.140501 | 1860.959473 | -0.729650615 | 0.018893306 | 0.04550964  | RALA       |
| ENSG00000143590 | 14.89288517 | 35.75840385 | -1.261403822 | 0.018897722 | 0.045516058 | EFNA3      |
| ENSG00000267100 | 386.1136957 | 271.5264193 | 0.507467529  | 0.018903806 | 0.045526491 | ILF3-DT    |
| ENSG00000237214 | 3614.967959 | 5539.202949 | -0.615682787 | 0.018921291 | 0.04556048  | AL080243.2 |
| ENSG00000265218 | 6.009699269 | 0.336469917 | 3.960676693  | 0.018921426 | 0.04556048  | AC103810.2 |
| ENSG00000205084 | 167.7806171 | 248.272297  | -0.564903702 | 0.018938772 | 0.045598019 | TMEM231    |
| ENSG00000285755 | 9.573934608 | 1.10029862  | 3.140430495  | 0.018947686 | 0.045615254 | AC132153.1 |
| ENSG00000198730 | 753.2659016 | 1211.293556 | -0.685614163 | 0.018951899 | 0.045621169 | CTR9       |
| novel.1089      | 47.05739063 | 9.893230966 | 2.253916764  | 0.018954318 | 0.045621866 | -          |
| ENSG00000210151 | 11.51232434 | 2.211209725 | 2.399793224  | 0.0189557   | 0.045621866 | MT-TS1     |
| ENSG00000186416 | 210.1520668 | 314.9555084 | -0.584228869 | 0.01896243  | 0.045633835 | NKRF       |
| ENSG00000235027 | 32.01586254 | 12.03593267 | 1.419205587  | 0.018967081 | 0.045640802 | AC068580.3 |
| ENSG00000152931 | 9.170158507 | 0.713078025 | 3.676664998  | 0.018969946 | 0.045643469 | PART1      |
| ENSG00000155508 | 820.7296869 | 1511.047229 | -0.880455265 | 0.018983203 | 0.045669016 | CNOT8      |
| ENSG00000189223 | 386.6172191 | 1930.115666 | -2.319762598 | 0.01898408  | 0.045669016 | PAX8-AS1   |
| ENSG00000242337 | 11.71480358 | 1.844058227 | 2.687535107  | 0.018990129 | 0.04567934  | INHCAP     |
| ENSG00000205560 | 11.94633055 | 1.161661783 | 3.416987056  | 0.019005055 | 0.045711009 | CPT1B      |
| ENSG00000171522 | 605.5109091 | 161.1592692 | 1.908781545  | 0.019007761 | 0.045713286 | PTGER4     |
| ENSG00000163521 | 96.0548957  | 217.8644313 | -1.182371406 | 0.019011293 | 0.04571755  | GLB1L      |
| ENSG00000073060 | 801.3308594 | 1262.980951 | -0.656611249 | 0.019032061 | 0.045763254 | SCARB1     |
| ENSG00000266302 | 3.685227059 | 42.99539018 | -3.546641309 | 0.019034615 | 0.045765162 | AC098850.3 |
| ENSG00000180817 | 1148.755538 | 2055.775347 | -0.839768624 | 0.019049578 | 0.045796898 | PPA1       |
| ENSG00000245156 | 8.087600719 | 26.95254727 | -1.730287878 | 0.019061405 | 0.045821092 | AP001107.1 |
| ENSG00000071859 | 1781.843134 | 2683.477789 | -0.590602287 | 0.019069702 | 0.045836797 | FAM50A     |
| ENSG00000188419 | 422.3375444 | 659.318531  | -0.642247152 | 0.019072526 | 0.045839342 | CHM        |
| ENSG00000281195 | 28.3212192  | 3.53586442  | 2.997527483  | 0.019074861 | 0.045840715 | AC007878.1 |

|                 |             |             |              |             |             |            |
|-----------------|-------------|-------------|--------------|-------------|-------------|------------|
| ENSG00000228817 | 13.85950477 | 2.893606169 | 2.265426596  | 0.01907751  | 0.045842841 | BACH1-IT2  |
| novel.40        | 12.02337295 | 0           | 5.920952401  | 0.019108947 | 0.045914136 | -          |
| ENSG00000206140 | 19.44021242 | 5.522718069 | 1.829016653  | 0.019110956 | 0.045914716 | TMEM191C   |
| ENSG00000198890 | 682.1918686 | 444.6427918 | 0.616957564  | 0.019114226 | 0.045914879 | PRMT6      |
| ENSG00000180694 | 685.1180631 | 432.9821701 | 0.662085509  | 0.019114558 | 0.045914879 | TMEM64     |
| ENSG00000261742 | 22.77822011 | 1.00940975  | 4.464052098  | 0.019116562 | 0.045915291 | LINC00922  |
| ENSG00000227232 | 110.5603304 | 40.51515704 | 1.446674808  | 0.019118264 | 0.045915291 | WASH7P     |
| ENSG00000268119 | 12.42603794 | 2.261960402 | 2.49119172   | 0.019144849 | 0.045970901 | AC010615.2 |
| ENSG00000169062 | 1521.479827 | 1063.523501 | 0.516743824  | 0.019144958 | 0.045970901 | UPF3A      |
| ENSG00000270021 | 19.76619068 | 6.05286248  | 1.701508713  | 0.019173405 | 0.046034953 | AC026691.1 |
| ENSG00000175054 | 470.4842036 | 758.5037202 | -0.689199892 | 0.019195847 | 0.046084579 | ATR        |
| ENSG00000006128 | 23.40976224 | 110.9404461 | -2.245924437 | 0.019221359 | 0.046141562 | TAC1       |
| ENSG00000102904 | 64.1235978  | 28.03778548 | 1.186806561  | 0.01922341  | 0.046142224 | TSNAXIP1   |
| ENSG00000274523 | 823.583913  | 1257.051025 | -0.610299356 | 0.019234621 | 0.046164868 | RCC1L      |
| ENSG00000155090 | 823.3445695 | 1720.981887 | -1.063539935 | 0.019253157 | 0.04620463  | KLF10      |
| ENSG00000271870 | 67.10142271 | 35.33476948 | 0.923639255  | 0.019254745 | 0.04620463  | AC024060.1 |
| ENSG00000038382 | 3401.306101 | 5591.783752 | -0.717167323 | 0.019261098 | 0.046215607 | TRIO       |
| ENSG00000133519 | 5.725305234 | 0           | 4.851580463  | 0.01926315  | 0.046216262 | ZDHHC8P1   |
| ENSG00000233337 | 11.49337707 | 2.567748738 | 2.179107639  | 0.019265677 | 0.046218058 | UBE2FP3    |
| ENSG00000197818 | 491.0836605 | 342.002365  | 0.521874079  | 0.019267974 | 0.046219299 | SLC9A8     |
| ENSG00000116157 | 234.7393797 | 432.2562497 | -0.880039989 | 0.019282799 | 0.04625059  | GPX7       |
| ENSG00000161265 | 96.71619758 | 47.62903186 | 1.026443703  | 0.01928743  | 0.046257428 | U2AF1L4    |
| ENSG00000285572 | 4.543495031 | 0           | 4.517463198  | 0.019294281 | 0.046269587 | AL136441.1 |
| ENSG00000183067 | 6.720933631 | 0.387220594 | 4.119284312  | 0.019297006 | 0.046271852 | IGSF5      |
| ENSG00000184599 | 10.13931774 | 0.723690511 | 3.814249307  | 0.019306473 | 0.04629028  | TAFA3      |
| ENSG00000225774 | 9.581527772 | 0.713078025 | 3.742706687  | 0.019330194 | 0.046342878 | SIRPAP1    |
| ENSG00000010282 | 5.205552007 | 0           | 4.712390414  | 0.0193343   | 0.046348445 | HHATL      |
| ENSG00000182742 | 40.64907239 | 242.9425171 | -2.579831347 | 0.019340686 | 0.046357478 | HOXB4      |
| ENSG00000275228 | 5.643390438 | 0           | 4.832341286  | 0.019341637 | 0.046357478 | AC024257.5 |
| ENSG00000124151 | 848.7244011 | 1283.152972 | -0.596535379 | 0.019344221 | 0.046359395 | NCOA3      |
| ENSG00000180953 | 32.95095944 | 60.36426641 | -0.874068049 | 0.019356711 | 0.046380982 | ST20       |
| ENSG00000245322 | 22.94266261 | 7.735212064 | 1.557764228  | 0.019356799 | 0.046380982 | AC097460.1 |
| ENSG00000261366 | 22.17132403 | 7.418811243 | 1.569701319  | 0.019367882 | 0.046403259 | MANEA-DT   |
| ENSG00000279696 | 39.62626317 | 13.66765997 | 1.528553751  | 0.01937492  | 0.046415841 | AP001273.1 |
| ENSG00000155893 | 257.2799037 | 144.7312478 | 0.828346952  | 0.019383398 | 0.046431869 | PXYLP1     |
| ENSG00000001036 | 1043.264597 | 1693.787452 | -0.699351194 | 0.019388165 | 0.046439008 | FUCA2      |
| ENSG00000263002 | 258.9509245 | 173.4848898 | 0.578293368  | 0.019408482 | 0.046483386 | ZNF234     |
| ENSG00000279103 | 10.24734569 | 1.518200796 | 2.799029029  | 0.019417172 | 0.046499912 | AC138470.1 |
| ENSG00000100739 | 1.847628125 | 16.53734423 | -3.165849401 | 0.019429123 | 0.046523963 | BDKRB1     |
| ENSG00000175130 | 3332.175126 | 1846.899451 | 0.851305741  | 0.019430796 | 0.046523963 | MARCKSL1   |
| ENSG00000248388 | 0.308355904 | 5.848575501 | -4.164039051 | 0.019433884 | 0.046527069 | AC093801.1 |
| ENSG00000083844 | 616.3653821 | 458.1309729 | 0.428237081  | 0.019448467 | 0.046557692 | ZNF264     |
| ENSG00000087274 | 6564.053455 | 4370.325424 | 0.586836542  | 0.019455323 | 0.046569813 | ADD1       |
| ENSG00000284669 | 26.3140919  | 5.004470414 | 2.394238299  | 0.019468643 | 0.046596382 | AC092053.3 |
| ENSG00000198478 | 313.954451  | 145.2672528 | 1.110935632  | 0.01947001  | 0.046596382 | SH3BGR2    |
| ENSG00000173068 | 166.2376107 | 507.5787875 | -1.610856399 | 0.019523878 | 0.046720999 | BNC2       |
| ENSG00000268225 | 26.1018682  | 8.834226414 | 1.574498357  | 0.019559709 | 0.046802431 | AC010487.1 |
| ENSG00000134343 | 65.29977979 | 9.102316702 | 2.838658431  | 0.019566557 | 0.046814506 | ANO3       |
| ENSG00000173678 | 1.817398012 | 10.09751795 | -2.473426077 | 0.019569418 | 0.046817039 | SPDYE2B    |
| ENSG00000164332 | 568.625219  | 839.2457941 | -0.561987311 | 0.019580764 | 0.046839869 | UBLCP1     |
| ENSG00000234219 | 5.153938595 | 0           | 4.699244122  | 0.019592344 | 0.046863257 | CDCA4P4    |

|                 |             |             |              |             |             |            |
|-----------------|-------------|-------------|--------------|-------------|-------------|------------|
| ENSG00000182504 | 621.1246646 | 345.0357653 | 0.848087916  | 0.019599996 | 0.046877243 | CEP97      |
| ENSG00000142409 | 568.2809502 | 770.5381937 | -0.439024981 | 0.019614733 | 0.046908171 | ZNF787     |
| ENSG00000197837 | 29.35495561 | 9.680771646 | 1.601425245  | 0.019643151 | 0.046971808 | HIST4H4    |
| ENSG00000254877 | 5.182915058 | 0           | 4.706645041  | 0.019648551 | 0.046980398 | AP001636.2 |
| ENSG00000163624 | 12.17062037 | 2.149846562 | 2.498540518  | 0.019653785 | 0.046988588 | CDS1       |
| ENSG00000278709 | 58.72455555 | 21.44146917 | 1.460478     | 0.019660745 | 0.047000904 | NKILA      |
| ENSG00000286886 | 0           | 5.420060839 | -5.018866182 | 0.019663325 | 0.047002746 | AJ011931.2 |
| ENSG00000108961 | 54.23127809 | 27.85215493 | 0.964564141  | 0.019673783 | 0.04702043  | RANGRF     |
| novel.505       | 28.54607848 | 11.87306815 | 1.266360293  | 0.019674343 | 0.04702043  | -          |
| ENSG00000121073 | 729.1536252 | 1090.130661 | -0.58047487  | 0.019677354 | 0.047023302 | SLC35B1    |
| ENSG00000238260 | 21.475276   | 6.696276607 | 1.671668557  | 0.019690219 | 0.047049717 | AL513320.1 |
| ENSG00000129562 | 2291.200788 | 3539.481735 | -0.627431544 | 0.019692293 | 0.047050347 | DAD1       |
| ENSG00000183741 | 1893.359132 | 2977.058283 | -0.65299666  | 0.019698508 | 0.047060641 | CBX6       |
| ENSG00000161642 | 534.0354774 | 254.9650119 | 1.067297613  | 0.019701842 | 0.047060641 | ZNF385A    |
| ENSG00000142449 | 7.348999548 | 0.387220594 | 4.248131634  | 0.019702036 | 0.047060641 | FBN3       |
| ENSG00000253915 | 5.949239044 | 0           | 4.908139174  | 0.019715463 | 0.047088385 | MAPRE1P1   |
| ENSG00000187627 | 1.846374476 | 13.65332307 | -2.891758555 | 0.01972149  | 0.047098451 | RGPD1      |
| ENSG00000236279 | 7.677485103 | 0.356539013 | 4.311013159  | 0.019725029 | 0.047102571 | CLEC2L     |
| ENSG00000184349 | 88.48073617 | 316.7747331 | -1.840257451 | 0.0197397   | 0.047133274 | EFNA5      |
| ENSG00000226816 | 13.45948961 | 1.702418679 | 2.948494048  | 0.019784977 | 0.047237042 | AC005082.1 |
| ENSG00000198912 | 315.304765  | 441.7587238 | -0.486656062 | 0.019815203 | 0.04730486  | C1orf174   |
| ENSG00000268747 | 9.657103052 | 1.00940975  | 3.205875957  | 0.019824952 | 0.047323784 | AC022432.1 |
| novel.536       | 65.31837176 | 116.1369559 | -0.830224049 | 0.019880982 | 0.047449278 | -          |
| ENSG00000161533 | 877.0751662 | 642.5976711 | 0.448740335  | 0.019881176 | 0.047449278 | ACOX1      |
| ENSG00000253953 | 25.52939011 | 108.4832573 | -2.088322662 | 0.019886645 | 0.04745797  | PCDHGB4    |
| novel.508       | 66.11012473 | 131.4509369 | -0.993691474 | 0.019899758 | 0.047484903 | -          |
| ENSG00000188549 | 5126.725999 | 1779.7237   | 1.526482495  | 0.019911517 | 0.047508598 | CCDC9B     |
| ENSG00000196358 | 60.58744093 | 18.92228775 | 1.681086115  | 0.019916633 | 0.047516442 | NTNG2      |
| ENSG00000279623 | 5.084631558 | 0           | 4.68142831   | 0.019946707 | 0.047579453 | AL359697.1 |
| ENSG00000153802 | 5.084631558 | 0           | 4.68142831   | 0.019946707 | 0.047579453 | TMPRSS11D  |
| ENSG00000265666 | 74.63792863 | 37.60515901 | 0.985089958  | 0.019958755 | 0.047600795 | RARA-AS1   |
| ENSG00000137942 | 360.643539  | 687.5940544 | -0.931433679 | 0.019959961 | 0.047600795 | FBNP1L     |
| ENSG00000107175 | 889.1764799 | 1202.566131 | -0.435725637 | 0.019961151 | 0.047600795 | CREB3      |
| ENSG00000281903 | 1.818651661 | 12.38057493 | -2.760930648 | 0.01999127  | 0.047668244 | LINC02246  |
| ENSG00000286527 | 4.542241382 | 0           | 4.51711123   | 0.020011724 | 0.047712637 | AL161665.2 |
| ENSG00000119139 | 10.01331142 | 31.88414295 | -1.673665429 | 0.020037836 | 0.04777051  | TJP2       |
| ENSG00000174137 | 29.11368418 | 54.57230218 | -0.90703102  | 0.020042179 | 0.04777648  | FAM53A     |
| ENSG00000267757 | 0           | 5.187404028 | -4.952002532 | 0.020051646 | 0.047794663 | EML2-AS1   |
| ENSG00000106588 | 123.3098115 | 70.98478391 | 0.795465067  | 0.02009305  | 0.047885132 | PSMA2      |
| ENSG00000182899 | 7239.785406 | 11287.62993 | -0.64072888  | 0.020093288 | 0.047885132 | RPL35A     |
| ENSG00000165997 | 451.4904192 | 688.2451832 | -0.60789931  | 0.020118421 | 0.04794063  | ARL5B      |
| ENSG00000081377 | 783.1721817 | 461.9460412 | 0.762269818  | 0.020120947 | 0.047942253 | CDC14B     |
| ENSG00000105856 | 108.0896944 | 43.99269356 | 1.301598996  | 0.020132521 | 0.047965431 | HBP1       |
| ENSG00000166750 | 1596.472475 | 2891.493688 | -0.856985351 | 0.020151636 | 0.04800657  | SLFN5      |
| ENSG00000232645 | 15.11807263 | 3.537020296 | 2.087168045  | 0.020218487 | 0.048161411 | LINC01431  |
| ENSG00000287910 | 12.40716194 | 1.90542139  | 2.742849471  | 0.020229896 | 0.048184169 | AC104024.4 |
| ENSG00000043143 | 1042.26028  | 655.9148748 | 0.667632032  | 0.020233182 | 0.04818758  | JADE2      |
| ENSG00000160305 | 1337.061954 | 811.3457353 | 0.720873976  | 0.020263673 | 0.048255774 | DIP2A      |
| novel.143       | 8.515623423 | 1.130980201 | 2.954802861  | 0.020269852 | 0.048266064 | -          |
| novel.89        | 208.8011277 | 89.52849013 | 1.2244016    | 0.020289081 | 0.048307424 | -          |
| ENSG00000075391 | 1246.883963 | 698.7508677 | 0.835092071  | 0.020292772 | 0.048311785 | RASAL2     |

|                 |             |             |              |             |             |             |
|-----------------|-------------|-------------|--------------|-------------|-------------|-------------|
| ENSG00000153914 | 2202.711971 | 1365.693093 | 0.689736225  | 0.020300969 | 0.048326871 | SREK1       |
| ENSG00000132781 | 479.7315199 | 284.9096443 | 0.751547824  | 0.02032309  | 0.048375099 | MUTYH       |
| ENSG00000228106 | 72.0638089  | 32.7789175  | 1.132290856  | 0.02035169  | 0.048438738 | AL392172.1  |
| ENSG00000144655 | 955.7039621 | 397.1492696 | 1.267123139  | 0.020356359 | 0.048445412 | CSRNP1      |
| ENSG00000221923 | 104.8109638 | 200.027964  | -0.93243189  | 0.020362514 | 0.048455621 | ZNF880      |
| ENSG00000260630 | 126.3671148 | 82.24982423 | 0.619581815  | 0.020375165 | 0.04847848  | SNAI3-AS1   |
| ENSG00000267076 | 1.817398012 | 9.222731278 | -2.347459428 | 0.020375852 | 0.04847848  | CCDC58P3    |
| ENSG00000255968 | 5.753028049 | 0           | 4.858048495  | 0.020395737 | 0.048516905 | AC024145.1  |
| ENSG00000257735 | 5.753028049 | 0           | 4.858048495  | 0.020395737 | 0.048516905 | AC090115.1  |
| ENSG00000100197 | 0           | 4.566499142 | -4.775550422 | 0.020397979 | 0.048517797 | CYP2D6      |
| ENSG00000239998 | 11.64216287 | 0           | 5.87464785   | 0.020402642 | 0.048524445 | LILRA2      |
| ENSG00000150477 | 179.8563589 | 108.5281474 | 0.730643468  | 0.020418175 | 0.048556943 | KIAA1328    |
| ENSG00000170160 | 4.606533824 | 131.7322766 | -4.838919662 | 0.020421903 | 0.048561363 | CCDC144A    |
| ENSG00000258100 | 6.146988423 | 0           | 4.95227632   | 0.020427146 | 0.048569385 | AC025035.1  |
| ENSG00000285825 | 31.54152575 | 13.19772285 | 1.253525892  | 0.020459536 | 0.048641947 | CCDC15-DT   |
| ENSG00000280048 | 12.63994256 | 2.211209725 | 2.533625428  | 0.020480096 | 0.048686374 | AC012409.5  |
| ENSG00000125841 | 921.1401745 | 1332.428399 | -0.532564061 | 0.020488285 | 0.048701384 | NRSN2       |
| ENSG00000225411 | 10.94973324 | 2.089639274 | 2.365740674  | 0.020498572 | 0.04872138  | CR786580.1  |
| ENSG00000196136 | 16.39530303 | 2.231278821 | 2.897038817  | 0.02050636  | 0.048735433 | SERPINA3    |
| ENSG00000180245 | 13.12556219 | 1.854670712 | 2.845918924  | 0.020512697 | 0.048746032 | RRH         |
| ENSG00000182963 | 538.0537824 | 1065.212538 | -0.985026393 | 0.020542069 | 0.048811369 | GJC1        |
| ENSG00000261783 | 2.125753916 | 10.21207193 | -2.271954946 | 0.020560161 | 0.04884989  | AC009054.2  |
| ENSG00000130695 | 254.5113683 | 382.2467344 | -0.587537008 | 0.020570457 | 0.048869882 | CEP85       |
| ENSG00000122176 | 976.854228  | 266.8576137 | 1.87173549   | 0.020588346 | 0.048907911 | FMOD        |
| ENSG00000185220 | 135.0944203 | 77.73193958 | 0.794567433  | 0.020605452 | 0.04894407  | PGBD2       |
| ENSG00000186583 | 9.776698582 | 0           | 5.622702238  | 0.020632279 | 0.049003314 | SPATC1      |
| ENSG00000273055 | 68.83347316 | 22.72624246 | 1.597596001  | 0.020652457 | 0.049046754 | AC005046.1  |
| ENSG00000144791 | 256.1375699 | 370.5654958 | -0.533151373 | 0.020695778 | 0.049145143 | LIMD1       |
| ENSG00000140365 | 920.6368337 | 1447.006562 | -0.652414557 | 0.020713987 | 0.049183888 | COMMD4      |
| novel.26        | 0           | 87.78691355 | -9.036890783 | 0.020750377 | 0.049261392 | -           |
| ENSG00000111961 | 2534.395934 | 1224.273992 | 1.04991807   | 0.020750421 | 0.049261392 | SASH1       |
| ENSG00000233184 | 79.33139185 | 170.8581365 | -1.108512157 | 0.020764943 | 0.049289101 | AC093157.1  |
| ENSG00000203805 | 21.34718966 | 94.19473963 | -2.14212922  | 0.020767428 | 0.049289101 | PLPP4       |
| ENSG00000179909 | 140.2220315 | 59.76124726 | 1.228209184  | 0.020767784 | 0.049289101 | ZNF154      |
| ENSG00000015568 | 46.30937352 | 20.87028748 | 1.151971751  | 0.020770611 | 0.049291307 | RGPD5       |
| ENSG00000258230 | 9.074382304 | 1.386017859 | 2.680743305  | 0.020788603 | 0.049327541 | AC063950.1  |
| ENSG00000163697 | 968.3599829 | 1385.26608  | -0.516728843 | 0.020789676 | 0.049327541 | APBB2       |
| ENSG00000224786 | 29.71617857 | 10.8837275  | 1.455481499  | 0.020811769 | 0.049375453 | CETN4P      |
| ENSG00000102710 | 771.6357964 | 1101.058983 | -0.512683319 | 0.020817149 | 0.049383706 | SUPT20H     |
| ENSG00000279022 | 8.531992128 | 1.060160428 | 2.994238782  | 0.020819845 | 0.049385592 | AL359715.4  |
| ENSG00000166206 | 74.12472874 | 15.7987217  | 2.223651603  | 0.020829078 | 0.049402983 | GABRB3      |
| ENSG00000269925 | 19.13687111 | 6.359806691 | 1.578914864  | 0.020842988 | 0.049431462 | Z98884.2    |
| ENSG00000168924 | 869.418626  | 1340.815488 | -0.624962846 | 0.020862836 | 0.049473048 | LETM1       |
| ENSG00000205578 | 1.773306493 | 12.27090123 | -2.775700163 | 0.020864331 | 0.049473048 | POM121B     |
| ENSG00000117505 | 1101.310157 | 1578.547078 | -0.519538393 | 0.020877132 | 0.049498884 | DR1         |
| ENSG00000179826 | 0           | 8.783347342 | -5.712764007 | 0.020884341 | 0.049511458 | MRGPRX3     |
| ENSG00000117862 | 161.1626531 | 294.9744257 | -0.872946719 | 0.020892528 | 0.049526347 | TXNDC12     |
| ENSG00000114378 | 56.45775154 | 26.40734245 | 1.08927228   | 0.020899877 | 0.04953925  | HYAL1       |
| ENSG00000242242 | 11.97781432 | 2.089639274 | 2.500180668  | 0.020910577 | 0.04955791  | NECTIN3-AS1 |
| ENSG00000154265 | 213.9022979 | 105.7711377 | 1.013618403  | 0.020911565 | 0.04955791  | ABCA5       |
| ENSG00000135469 | 236.5754403 | 147.7385904 | 0.680646031  | 0.020936505 | 0.04961249  | COQ10A      |

|                 |             |             |              |             |             |            |
|-----------------|-------------|-------------|--------------|-------------|-------------|------------|
| ENSG00000260097 | 14.89163152 | 38.9459016  | -1.384313281 | 0.020948345 | 0.04963602  | SPDYE6     |
| ENSG00000115687 | 169.6342284 | 268.9755288 | -0.665495751 | 0.020953698 | 0.049642046 | PASK       |
| ENSG00000141252 | 87.92069617 | 179.287852  | -1.027062772 | 0.02095471  | 0.049642046 | VPS53      |
| ENSG00000077943 | 271.3109995 | 56.37203107 | 2.265529179  | 0.020980376 | 0.049698319 | ITGA8      |
| ENSG00000188385 | 24.37766783 | 8.489584156 | 1.512965263  | 0.02098374  | 0.049701756 | JAKMIP3    |
| ENSG00000253434 | 5.922769878 | 0           | 4.902093582  | 0.020990374 | 0.049712935 | LINC02237  |
| ENSG00000100429 | 30.37608426 | 56.90623823 | -0.905925555 | 0.020995507 | 0.049719848 | HDAC10     |
| ENSG00000159247 | 5.503878721 | 0           | 4.79313034   | 0.02099712  | 0.049719848 | TUBBP5     |
| ENSG00000287262 | 29.6787113  | 12.43260987 | 1.26497503   | 0.021003521 | 0.049730472 | AC021148.2 |
| ENSG00000232907 | 18.65340278 | 5.777755727 | 1.695703761  | 0.021013294 | 0.049749078 | DLGAP4-AS1 |
| ENSG00000266389 | 7.312429921 | 0.743759607 | 3.330657548  | 0.021043107 | 0.049815122 | AC002091.2 |
| ENSG00000087495 | 6.042436679 | 0.356539013 | 3.967442048  | 0.021060424 | 0.049851575 | PHACTR3    |
| ENSG00000232713 | 9.947836602 | 1.00940975  | 3.250590544  | 0.021076126 | 0.049884197 | AC010733.1 |
| ENSG00000253710 | 95.23201498 | 161.7074965 | -0.762960245 | 0.021079664 | 0.049888027 | ALG11      |
| ENSG00000088543 | 434.9014128 | 260.2234113 | 0.742179914  | 0.021088836 | 0.049905186 | C3orf18    |
| ENSG00000123066 | 1663.068881 | 1144.263913 | 0.5395554    | 0.021102788 | 0.049933654 | MED13L     |
| ENSG00000286610 | 4.559863736 | 0           | 4.522108407  | 0.021123235 | 0.049977486 | AL356433.1 |
| ENSG00000186272 | 109.9844195 | 56.83336349 | 0.949801716  | 0.021133225 | 0.049996568 | ZNF17      |
| ENSG00000253372 | 4.55610279  | 0           | 4.521047524  | 0.021144115 | 0.050017778 | AC016405.1 |
| ENSG00000285904 | 6.034914786 | 0.336469917 | 3.96587566   | 0.021147225 | 0.050020579 | AC006452.1 |
| novel.486       | 0.925067711 | 9.946293394 | -3.435639145 | 0.021164134 | 0.050056018 | -          |
| ENSG00000141391 | 269.6925235 | 144.1705502 | 0.902480317  | 0.02116931  | 0.050063704 | PRELID3A   |
| ENSG00000273483 | 17.11029834 | 3.281982638 | 2.392101362  | 0.021195857 | 0.05011754  | AL354760.1 |
| ENSG00000006555 | 8.924770125 | 0           | 5.490790079  | 0.021196962 | 0.05011754  | TTC22      |
| ENSG00000259430 | 6.788631014 | 0           | 5.098733197  | 0.021197862 | 0.05011754  | CERS3-AS1  |
| ENSG00000149179 | 431.2113133 | 595.7519763 | -0.466120207 | 0.021201483 | 0.05012154  | C11orf49   |
| ENSG00000143382 | 216.4156171 | 523.693538  | -1.275078387 | 0.021214613 | 0.050148017 | ADAMTSL4   |
| ENSG00000108688 | 0.308355904 | 6.381031662 | -4.294895059 | 0.021218698 | 0.050153111 | CCL7       |
| ENSG00000229727 | 6.109236418 | 0.387220594 | 3.98140953   | 0.021256941 | 0.050235804 | AC013460.1 |
| ENSG00000115129 | 577.6234288 | 1004.82181  | -0.799033188 | 0.021257551 | 0.050235804 | TP53I3     |
| ENSG00000198182 | 161.7694504 | 90.6103891  | 0.83868895   | 0.021276114 | 0.050272012 | ZNF607     |
| ENSG00000258890 | 738.2445069 | 459.5016736 | 0.684198181  | 0.021276743 | 0.050272012 | CEP95      |
| ENSG00000288009 | 13.05661116 | 2.169915658 | 2.592725468  | 0.021295802 | 0.050312471 | AL353135.2 |
| ENSG00000163785 | 854.3919665 | 1210.554138 | -0.502704701 | 0.021298054 | 0.050313216 | RYK        |
| ENSG00000198624 | 282.8325712 | 119.1955284 | 1.245155218  | 0.021313586 | 0.050345329 | CCDC69     |
| ENSG00000138771 | 1599.710541 | 729.380963  | 1.133388621  | 0.021320026 | 0.050355962 | SHROOM3    |
| ENSG00000180730 | 75.33719563 | 465.0631266 | -2.626104253 | 0.021373763 | 0.050478296 | SHISA2     |
| ENSG00000211698 | 4.514518568 | 0           | 4.509217775  | 0.02137645  | 0.050480053 | TRGV4      |
| ENSG00000110330 | 1696.442362 | 2462.218897 | -0.537328325 | 0.021381965 | 0.050488487 | BIRC2      |
| ENSG00000261036 | 0           | 4.42241945  | -4.721665961 | 0.021388433 | 0.050499172 | AC113418.1 |
| ENSG00000255866 | 0           | 5.696195073 | -5.085240775 | 0.021430818 | 0.050594645 | AC090023.1 |
| ENSG00000261327 | 8.286603747 | 31.07393028 | -1.910041046 | 0.0214469   | 0.050628013 | AC134312.5 |
| ENSG00000183831 | 11.51601402 | 1.069617038 | 3.422570689  | 0.021452907 | 0.050637591 | ANKRD45    |
| ENSG00000264659 | 5.781933241 | 0           | 4.864782827  | 0.021466132 | 0.050664205 | AC064805.2 |
| ENSG00000169047 | 1371.716989 | 2834.87638  | -1.047245473 | 0.021477797 | 0.050687133 | IRS1       |
| ENSG00000254717 | 0.308355904 | 5.410604229 | -4.054245351 | 0.021491751 | 0.050714196 | GLYATL1P2  |
| ENSG00000272918 | 28.64149868 | 8.650136924 | 1.729084533  | 0.021493169 | 0.050714196 | AC005070.3 |
| ENSG00000232630 | 27.35639038 | 9.843636164 | 1.483242869  | 0.021501586 | 0.050725975 | PRPS1P2    |
| ENSG00000197696 | 70.18770251 | 144.5332538 | -1.044071056 | 0.021502065 | 0.050725975 | NMB        |
| ENSG00000254719 | 4.538480436 | 18.07933854 | -1.992316106 | 0.021520765 | 0.050764926 | AC080023.2 |
| ENSG00000108389 | 778.960078  | 1485.393637 | -0.931026078 | 0.021522484 | 0.050764926 | MTMR4      |



|                 |             |             |              |             |             |            |
|-----------------|-------------|-------------|--------------|-------------|-------------|------------|
| ENSG00000267882 | 1.49643435  | 9.904999327 | -2.714093358 | 0.021536629 | 0.050792552 | AL031666.2 |
| ENSG00000167604 | 270.4443172 | 114.2606278 | 1.244532726  | 0.021538106 | 0.050792552 | NFKBID     |
| ENSG00000053254 | 924.5717922 | 609.0441237 | 0.602502353  | 0.02154896  | 0.050809938 | FOXN3      |
| ENSG00000136146 | 739.1195114 | 540.4192315 | 0.451300268  | 0.02154939  | 0.050809938 | MED4       |
| ENSG00000180509 | 8.153075539 | 0.713078025 | 3.508535843  | 0.021555369 | 0.050819422 | KCNE1      |
| novel.260       | 14.06456258 | 2.527610546 | 2.481879457  | 0.02156737  | 0.050843103 | -          |
| ENSG00000128335 | 1248.596627 | 787.7257714 | 0.66430009   | 0.021591458 | 0.050895271 | APOL2      |
| ENSG00000164346 | 1305.11394  | 1924.377122 | -0.560400308 | 0.021595046 | 0.050899109 | NSA2       |
| novel.495       | 12.40332972 | 2.782648203 | 2.134022692  | 0.021617541 | 0.050944057 | -          |
| ENSG00000235576 | 4.895942455 | 0           | 4.623930178  | 0.021619184 | 0.050944057 | LINC01871  |
| ENSG00000254893 | 14.02200944 | 37.61936752 | -1.429185235 | 0.021619998 | 0.050944057 | AC113404.3 |
| ENSG00000254348 | 5.732827126 | 0.336469917 | 3.891856887  | 0.021634052 | 0.050972551 | AC120036.3 |
| ENSG00000250608 | 35.21246413 | 10.77289792 | 1.698283302  | 0.021638521 | 0.050978456 | AC010210.1 |
| ENSG00000230555 | 39.42295721 | 14.33931553 | 1.457583156  | 0.021640739 | 0.05097906  | AL450326.1 |
| ENSG00000253741 | 26.27794955 | 4.394178013 | 2.559079143  | 0.021657383 | 0.051013641 | LNCOC1     |
| ENSG00000189164 | 145.4856515 | 86.42337058 | 0.749695593  | 0.021661044 | 0.051017641 | ZNF527     |
| ENSG00000134987 | 534.1279087 | 763.4951383 | -0.515569035 | 0.021665386 | 0.05102324  | WDR36      |
| ENSG00000173915 | 1319.204473 | 1851.56522  | -0.489184479 | 0.021699549 | 0.051099066 | ATP5MD     |
| ENSG00000261652 | 24.60041926 | 48.08146842 | -0.968067942 | 0.021703402 | 0.051103507 | C15orf65   |
| ENSG00000140829 | 1149.498248 | 1677.826166 | -0.545515652 | 0.021710575 | 0.051115764 | DHX38      |
| ENSG00000166166 | 610.3637463 | 375.4622319 | 0.700239838  | 0.021719706 | 0.051132628 | TRMT61A    |
| novel.459       | 14.56439962 | 32.05163097 | -1.141292303 | 0.021733611 | 0.051160728 | -          |
| ENSG00000074317 | 0           | 7.824816664 | -5.54698304  | 0.021742334 | 0.051176624 | SNCB       |
| ENSG00000180938 | 45.24124661 | 22.79821811 | 0.984548644  | 0.021748167 | 0.051185716 | ZNF572     |
| ENSG00000147082 | 13.83930385 | 2.762579107 | 2.301538775  | 0.021754391 | 0.051195727 | CCNB3      |
| ENSG00000100206 | 19.27763648 | 48.0770205  | -1.32029354  | 0.021758866 | 0.051201622 | DMC1       |
| ENSG00000149476 | 364.9210181 | 561.4294547 | -0.622108585 | 0.021763745 | 0.051204938 | TKFC       |
| ENSG00000238280 | 9.810832183 | 1.080229524 | 3.183878902  | 0.021764217 | 0.051204938 | AC067751.1 |
| ENSG00000091262 | 17.40013425 | 4.310305609 | 2.012099898  | 0.021786518 | 0.051252764 | ABCC6      |
| ENSG00000256162 | 6.961236146 | 0.743759607 | 3.261886856  | 0.021798942 | 0.051277348 | SMLR1      |
| ENSG00000131503 | 71.47571755 | 34.33366047 | 1.057858221  | 0.021803655 | 0.05128379  | ANKHD1     |
| ENSG00000150687 | 3306.453628 | 1642.578787 | 1.009229357  | 0.021809068 | 0.051291879 | PRSS23     |
| novel.43        | 9.525113227 | 0.693008929 | 3.749268408  | 0.021811298 | 0.051292482 | -          |
| ENSG00000110801 | 151.6360731 | 239.1571032 | -0.65767923  | 0.021826401 | 0.051323352 | PSMD9      |
| ENSG00000249816 | 0.909952655 | 8.131760874 | -3.155112248 | 0.021831812 | 0.051331429 | LINC00964  |
| ENSG00000171121 | 44.26456549 | 18.35688544 | 1.263871516  | 0.021839718 | 0.051345372 | KCNMB3     |
| ENSG00000268592 | 13.11198552 | 39.77965099 | -1.602238773 | 0.021847164 | 0.051358231 | AL355312.3 |
| ENSG00000137975 | 0.909952655 | 7.693789602 | -3.076546234 | 0.021861109 | 0.051386363 | CLCA2      |
| ENSG00000241975 | 20.39390059 | 5.492036488 | 1.903896638  | 0.021869634 | 0.051400956 | ELOCP19    |
| ENSG00000198060 | 615.1371434 | 854.2908672 | -0.47413137  | 0.02187215  | 0.051400956 | 5-Mar      |
| ENSG00000174945 | 33.31372079 | 8.650136924 | 1.945514596  | 0.021873252 | 0.051400956 | AMZ1       |
| novel.370       | 22.8409029  | 6.867441861 | 1.735892444  | 0.021878777 | 0.051409289 | -          |
| ENSG00000122085 | 585.1540232 | 413.3132631 | 0.501117623  | 0.021887292 | 0.051420933 | MTERF4     |
| ENSG00000163320 | 2363.094007 | 1715.499961 | 0.461991874  | 0.021887691 | 0.051420933 | CGGBP1     |
| ENSG00000104695 | 2871.122197 | 2049.015499 | 0.486542974  | 0.021951949 | 0.051567233 | PPP2CB     |
| ENSG00000167094 | 14.10761391 | 2.51699806  | 2.485919595  | 0.021962678 | 0.051587771 | TTC16      |
| ENSG00000125538 | 1030.021676 | 14299.55512 | -3.795223841 | 0.02197751  | 0.051617943 | IL1B       |
| ENSG00000279214 | 4.832974932 | 0           | 4.606957213  | 0.021988264 | 0.051629199 | AL109659.3 |
| ENSG00000231748 | 4.832974932 | 0           | 4.606957213  | 0.021988264 | 0.051629199 | AL596223.2 |
| ENSG00000184617 | 4.832974932 | 0           | 4.606957213  | 0.021988264 | 0.051629199 | ZNF840P    |
| ENSG00000123106 | 429.2401427 | 292.1627185 | 0.554981751  | 0.021990376 | 0.051629491 | CCDC91     |

|                 |             |             |              |             |             |            |
|-----------------|-------------|-------------|--------------|-------------|-------------|------------|
| ENSG00000164488 | 11.93518991 | 0.336469917 | 4.948599162  | 0.021999532 | 0.051646322 | DACT2      |
| ENSG00000214184 | 3.678887545 | 15.34628514 | -2.063468109 | 0.022024009 | 0.051699113 | GCC2-AS1   |
| ENSG00000100246 | 237.7016192 | 354.2038122 | -0.574743863 | 0.022064178 | 0.051788727 | DNAL4      |
| ENSG00000163872 | 1329.16613  | 2135.736469 | -0.684132244 | 0.022147048 | 0.051978542 | YEATS2     |
| ENSG00000117400 | 9.011414781 | 1.436768536 | 2.65112675   | 0.022155109 | 0.051992764 | MPL        |
| ENSG00000228495 | 4.573725143 | 0           | 4.5260607    | 0.022159064 | 0.051994383 | LINC01013  |
| ENSG00000279148 | 1.521649867 | 10.38554894 | -2.774553186 | 0.022159802 | 0.051994383 | AC126474.1 |
| ENSG00000130300 | 497.4576028 | 41.11894655 | 3.595677803  | 0.022162109 | 0.051995103 | PLVAP      |
| ENSG00000260804 | 263.8529214 | 142.0717111 | 0.891403855  | 0.022205062 | 0.052091171 | LINC01963  |
| ENSG00000196787 | 10.34186825 | 29.56544288 | -1.520705283 | 0.0222275   | 0.0521391   | HIST1H2AG  |
| ENSG00000282556 | 8.179544705 | 1.130980201 | 2.897826482  | 0.022287009 | 0.052273272 | AC068733.3 |
| ENSG0000058063  | 688.2321258 | 987.5730533 | -0.521040391 | 0.022288723 | 0.052273272 | ATP11B     |
| ENSG00000272509 | 10.77085987 | 1.406086955 | 2.92322513   | 0.022293798 | 0.052280456 | AC087752.4 |
| novel.59        | 9.720070575 | 1.456837632 | 2.748400123  | 0.022298769 | 0.052287393 | -          |
| ENSG00000167182 | 464.2224483 | 325.1515739 | 0.513759284  | 0.022304723 | 0.052296634 | SP2        |
| ENSG00000179219 | 0           | 4.280779903 | -4.679947263 | 0.022376383 | 0.052459917 | LINC00311  |
| ENSG00000286018 | 39.12037135 | 15.77377232 | 1.310655403  | 0.022403539 | 0.052518844 | AF129075.3 |
| ENSG00000154370 | 464.2302983 | 676.9981702 | -0.544015455 | 0.022406479 | 0.052520997 | TRIM11     |
| novel.721       | 76.25492778 | 37.9685861  | 1.008610878  | 0.022427943 | 0.052566565 | -          |
| ENSG00000147535 | 508.3200209 | 761.8589763 | -0.584224742 | 0.022439185 | 0.052588172 | PLPP5      |
| ENSG00000265752 | 10.84643515 | 1.702418679 | 2.633728675  | 0.02245276  | 0.052611861 | AC010754.1 |
| ENSG00000203362 | 14.46611612 | 32.21321122 | -1.150435035 | 0.022453343 | 0.052611861 | POLH-AS1   |
| ENSG00000260193 | 15.7021183  | 3.537020296 | 2.142678748  | 0.022490581 | 0.052694362 | AL138781.1 |
| ENSG00000245970 | 36.52404159 | 16.27670277 | 1.160191645  | 0.022500001 | 0.052711679 | AP003352.1 |
| ENSG00000214914 | 4.513264919 | 0           | 4.508838161  | 0.022510078 | 0.052726154 | RPL23AP3   |
| ENSG00000262454 | 25.56295424 | 54.82361542 | -1.09675219  | 0.022510238 | 0.052726154 | MIR193BHG  |
| ENSG00000205221 | 630.2199221 | 29.08160122 | 4.436670842  | 0.022513022 | 0.05272792  | VIT        |
| ENSG00000170074 | 11.09830524 | 0           | 5.805416795  | 0.022518357 | 0.052735662 | FAM153A    |
| ENSG00000271967 | 13.134409   | 2.527610546 | 2.38404695   | 0.022532119 | 0.052763136 | AL583856.2 |
| ENSG00000187240 | 473.4266851 | 781.5784453 | -0.723012456 | 0.022552196 | 0.05280539  | DYNC2H1    |
| ENSG00000140983 | 1793.335471 | 2607.452074 | -0.539861429 | 0.022557764 | 0.052813668 | RHOT2      |
| ENSG00000259518 | 0           | 4.799027558 | -4.840100641 | 0.022589234 | 0.052877816 | LINC01583  |
| ENSG00000231123 | 0           | 4.799027558 | -4.840100641 | 0.022589234 | 0.052877816 | SPATA20P1  |
| ENSG00000120800 | 439.9725824 | 760.8943276 | -0.790569973 | 0.022599298 | 0.052896609 | UTP20      |
| ENSG00000275278 | 7.191509471 | 0.356539013 | 4.219457327  | 0.022630042 | 0.052963799 | AC012150.2 |
| ENSG00000259248 | 22.66328317 | 8.876804751 | 1.346331011  | 0.02263263  | 0.052965085 | USP3-AS1   |
| ENSG00000103490 | 404.9630088 | 229.2288243 | 0.821504419  | 0.022639226 | 0.052975747 | PYCARD     |
| ENSG00000168646 | 57.89268548 | 24.33892814 | 1.244599681  | 0.02265306  | 0.053003346 | AXIN2      |
| ENSG00000157152 | 2.728604316 | 12.42443753 | -2.190254097 | 0.022678906 | 0.053059043 | SYN2       |
| novel.489       | 36.72820176 | 73.09462067 | -0.995349293 | 0.022686096 | 0.053071084 | -          |
| ENSG00000286787 | 22.00380477 | 6.725802314 | 1.703590183  | 0.022722387 | 0.053151197 | AL110114.1 |
| ENSG00000160050 | 136.8176517 | 219.2620763 | -0.681204675 | 0.022732195 | 0.053169352 | CCDC28B    |
| ENSG00000275426 | 19.7650083  | 3.129730605 | 2.64486177   | 0.022738241 | 0.053178705 | AC253576.2 |
| ENSG00000129250 | 6452.250196 | 4576.865538 | 0.495481408  | 0.022745931 | 0.053191903 | KIF1C      |
| ENSG00000179476 | 161.0607946 | 75.66882512 | 1.092714578  | 0.022749279 | 0.053194943 | C14orf28   |
| ENSG00000249915 | 133.2638885 | 273.9158919 | -1.038742588 | 0.022761564 | 0.053215583 | PDCD6      |
| ENSG00000133392 | 5.527769318 | 0           | 4.798978119  | 0.022762202 | 0.053215583 | MYH11      |
| ENSG00000280140 | 5.99709151  | 0.336469917 | 3.957866158  | 0.022792578 | 0.053281804 | AC098679.4 |
| ENSG00000286389 | 5.521501074 | 0           | 4.797459781  | 0.022799924 | 0.053294182 | AL731702.1 |
| ENSG00000224728 | 30.87535183 | 10.02900992 | 1.622999525  | 0.022840319 | 0.053383801 | IMPDH1P8   |
| ENSG00000158201 | 354.6652258 | 188.8889077 | 0.907687556  | 0.0228426   | 0.05338433  | ABHD3      |

|                 |             |             |              |             |             |            |
|-----------------|-------------|-------------|--------------|-------------|-------------|------------|
| ENSG00000179855 | 137.4342648 | 39.82886061 | 1.790083128  | 0.022854324 | 0.053406926 | GIPC3      |
| ENSG00000124102 | 0.89358395  | 13.86693826 | -3.944094264 | 0.022864064 | 0.053424881 | PI3        |
| ENSG00000217094 | 41.09679782 | 77.4341952  | -0.91553891  | 0.022868864 | 0.053427673 | PPIAP31    |
| ENSG00000213876 | 4.855611881 | 0           | 4.613075679  | 0.022869372 | 0.053427673 | RPL7AP64   |
| ENSG00000213809 | 16.30650708 | 0.713078025 | 4.509459939  | 0.022871732 | 0.053428381 | KLRK1      |
| ENSG00000255198 | 37.77161135 | 15.11144497 | 1.321469372  | 0.022875801 | 0.053432266 | SNHG9      |
| ENSG00000176401 | 96.40393818 | 56.00804323 | 0.78126636   | 0.022877508 | 0.053432266 | EID2B      |
| ENSG00000167173 | 331.7415101 | 467.8586896 | -0.495678612 | 0.022909512 | 0.053502205 | C15orf39   |
| ENSG00000143340 | 6.131944638 | 0           | 4.949018304  | 0.022916133 | 0.053512856 | FAM163A    |
| ENSG00000225937 | 4.84683634  | 0           | 4.610710054  | 0.022924547 | 0.053521396 | PCA3       |
| ENSG00000002726 | 4.84683634  | 0           | 4.610710054  | 0.022924547 | 0.053521396 | AOC1       |
| ENSG00000285863 | 13.34197411 | 1.069617038 | 3.637007538  | 0.02292597  | 0.053521396 | AC009554.2 |
| ENSG00000250602 | 15.58614117 | 2.792104814 | 2.466104243  | 0.022945897 | 0.053563013 | AC093535.1 |
| ENSG00000213073 | 16.76071422 | 45.17570871 | -1.429125719 | 0.022947919 | 0.053563013 | AL353625.1 |
| ENSG00000243317 | 753.6182495 | 1159.705377 | -0.622112278 | 0.022973897 | 0.05361883  | STMP1      |
| ENSG00000255085 | 5.826096032 | 0           | 4.87509149   | 0.02298255  | 0.053634209 | AF186192.2 |
| ENSG00000247950 | 52.05376822 | 26.86525442 | 0.953668276  | 0.022987939 | 0.053641965 | SEC24B-AS1 |
| ENSG00000248092 | 271.7645399 | 164.633548  | 0.721430083  | 0.022993186 | 0.053648844 | NNT-AS1    |
| ENSG00000101901 | 683.0247785 | 484.8605428 | 0.494318829  | 0.022995017 | 0.053648844 | ALG13      |
| ENSG00000170464 | 537.8367695 | 376.3458204 | 0.515691223  | 0.023025928 | 0.053716138 | DNAJC18    |
| ENSG00000140527 | 10.78096033 | 1.436768536 | 2.909463393  | 0.023033176 | 0.053728224 | WDR93      |
| ENSG00000163444 | 814.3094607 | 1103.309831 | -0.438256394 | 0.023043706 | 0.053747959 | TMEM183A   |
| novel.196       | 138.5112663 | 65.36300463 | 1.081329666  | 0.023046899 | 0.053750582 | -          |
| ENSG00000283443 | 10.87763417 | 0           | 5.777963443  | 0.023049222 | 0.053751175 | AC018688.1 |
| ENSG00000259498 | 0.616711807 | 9.648805795 | -3.97766256  | 0.023088186 | 0.053837208 | TPM1-AS    |
| ENSG00000116691 | 674.3541445 | 442.349251  | 0.608217267  | 0.023113574 | 0.053890599 | MIIP       |
| ENSG00000285480 | 6.306701063 | 0.336469917 | 4.030064466  | 0.023115232 | 0.053890599 | AC021097.2 |
| ENSG00000198221 | 0.616711807 | 8.293597912 | -3.763532304 | 0.023152539 | 0.053972734 | AFDN-DT    |
| ENSG00000170835 | 21.54576541 | 7.888619972 | 1.448731301  | 0.023157397 | 0.053979215 | CEL        |
| ENSG00000031698 | 1922.819946 | 2892.92145  | -0.589435475 | 0.023162638 | 0.053986588 | SARS       |
| ENSG00000164171 | 713.9293803 | 1420.797731 | -0.992651545 | 0.023167877 | 0.053993956 | ITGA2      |
| ENSG00000148288 | 239.4862357 | 117.7017162 | 1.023701221  | 0.023189875 | 0.054040376 | GBGT1      |
| ENSG00000224397 | 16.80731304 | 3.72941052  | 2.191272372  | 0.023194906 | 0.054044111 | SMIM25     |
| ENSG00000254057 | 0           | 4.768345977 | -4.831771104 | 0.023195638 | 0.054044111 | AC084346.1 |
| ENSG00000143740 | 383.9453734 | 667.5240444 | -0.798098886 | 0.023212479 | 0.0540785   | SNAP47     |
| ENSG00000271918 | 61.51193952 | 25.21499908 | 1.280681515  | 0.023231632 | 0.054118267 | AC034236.2 |
| ENSG00000181315 | 270.848604  | 167.2813976 | 0.694413634  | 0.023248698 | 0.054153167 | ZNF322     |
| novel.230       | 6.494136517 | 0           | 5.034811432  | 0.02325147  | 0.054154769 | -          |
| ENSG00000223834 | 17.36578718 | 2.679862578 | 2.728197911  | 0.023274875 | 0.054204421 | AL161935.1 |
| ENSG00000270059 | 7.869935152 | 1.049547942 | 2.882814394  | 0.023281221 | 0.05421292  | AC121493.1 |
| ENSG00000123728 | 601.1318305 | 447.0109926 | 0.427618229  | 0.023282698 | 0.05421292  | RAP2C      |
| ENSG00000074855 | 765.1904535 | 440.4158665 | 0.797620447  | 0.023286626 | 0.054216096 | ANO8       |
| ENSG00000244187 | 255.2804843 | 397.2711096 | -0.638462077 | 0.02329     | 0.054216096 | TMEM141    |
| ENSG00000229321 | 15.14676436 | 1.762625967 | 3.094165963  | 0.023290322 | 0.054216096 | AC008269.1 |
| ENSG00000230124 | 713.9389496 | 951.7586467 | -0.414880727 | 0.023312397 | 0.054262622 | ACBD6      |
| ENSG00000177732 | 662.2505651 | 1172.542388 | -0.823907841 | 0.023327676 | 0.054293321 | SOX12      |
| ENSG00000238121 | 12.26374673 | 1.406086955 | 3.109070971  | 0.023335038 | 0.054305592 | LINC00426  |
| ENSG00000181656 | 25.87549802 | 2.11916498  | 3.603051149  | 0.023347169 | 0.054327976 | GPR88      |
| ENSG00000164741 | 273.1650283 | 162.1459001 | 0.75212065   | 0.023348839 | 0.054327976 | DLC1       |
| ENSG00000134897 | 318.1698318 | 466.5398955 | -0.552223005 | 0.023364145 | 0.054358722 | BIVM       |
| ENSG00000259359 | 8.047270146 | 0.743759607 | 3.469803966  | 0.023375635 | 0.054380586 | AC012409.1 |

|                 |             |             |              |             |             |            |
|-----------------|-------------|-------------|--------------|-------------|-------------|------------|
| ENSG00000113360 | 748.2623466 | 1070.940399 | -0.517505495 | 0.023386503 | 0.054400998 | DROSHA     |
| ENSG00000255737 | 21.18454245 | 7.062272231 | 1.575781216  | 0.023406139 | 0.054441799 | AGAP2-AS1  |
| ENSG00000115252 | 277.0739146 | 45.82006878 | 2.594373962  | 0.023426738 | 0.054484834 | PDE1A      |
| ENSG00000171984 | 75.64093673 | 40.73707297 | 0.891664584  | 0.023444695 | 0.054521716 | SHLD1      |
| ENSG00000249806 | 5.629529031 | 0           | 4.828869008  | 0.023455705 | 0.054541076 | AC139720.1 |
| ENSG00000266947 | 53.59171552 | 16.62622532 | 1.680684271  | 0.023457436 | 0.054541076 | AC022916.1 |
| ENSG00000168116 | 139.0236399 | 229.6604211 | -0.724219182 | 0.023460447 | 0.054541076 | KIAA1586   |
| ENSG00000182511 | 607.1139499 | 284.921939  | 1.09049993   | 0.023461417 | 0.054541076 | FES        |
| ENSG00000154642 | 225.4803106 | 133.7632156 | 0.75320513   | 0.023487173 | 0.054596066 | C21orf91   |
| ENSG00000173905 | 1007.654822 | 1869.109088 | -0.891489883 | 0.023489516 | 0.054596629 | GOLIM4     |
| ENSG00000148120 | 859.4157279 | 369.7841921 | 1.216070677  | 0.023509    | 0.054635887 | AOPEP      |
| novel.60        | 22.39873406 | 6.45069556  | 1.797159836  | 0.023510612 | 0.054635887 | -          |
| ENSG00000100918 | 386.7294149 | 112.8917382 | 1.776317282  | 0.023513341 | 0.054637341 | REC8       |
| ENSG00000196387 | 247.9656618 | 161.2505307 | 0.621705723  | 0.023518423 | 0.054644263 | ZNF140     |
| ENSG00000008952 | 3605.933767 | 2526.033206 | 0.51345456   | 0.023551532 | 0.054716298 | SEC62      |
| ENSG00000165632 | 332.9542621 | 231.2909925 | 0.525065756  | 0.023558745 | 0.054724907 | TAF3       |
| ENSG00000164190 | 1301.522353 | 911.2254964 | 0.514480267  | 0.023559451 | 0.054724907 | NIPBL      |
| ENSG00000117877 | 51.60206839 | 111.6705923 | -1.115932842 | 0.023569059 | 0.054742332 | CD3EAP     |
| ENSG00000127884 | 1459.424294 | 2283.938862 | -0.646227555 | 0.023572674 | 0.054745835 | ECHS1      |
| ENSG00000170370 | 20.01555347 | 1.365948763 | 3.84932666   | 0.023574939 | 0.0547462   | EMX2       |
| ENSG00000235545 | 10.0700107  | 1.069617038 | 3.227770167  | 0.023585602 | 0.054764303 | AC103923.1 |
| ENSG00000268584 | 14.43463236 | 3.903015919 | 1.880655612  | 0.02358695  | 0.054764303 | AC073389.1 |
| ENSG00000287619 | 10.80359728 | 2.191140629 | 2.316957495  | 0.023596324 | 0.054781171 | AL021308.1 |
| ENSG00000226002 | 19.45790604 | 4.555886656 | 2.082450356  | 0.023670818 | 0.054949207 | GTF2IP14   |
| ENSG00000185504 | 668.0019835 | 919.7474579 | -0.46139276  | 0.02369746  | 0.055006138 | FAAP100    |
| ENSG00000237980 | 4.574978792 | 0           | 4.526450167  | 0.023716922 | 0.055031681 | AL590648.3 |
| ENSG00000224238 | 4.574978792 | 0           | 4.526450167  | 0.023716922 | 0.055031681 | WARS2-IT1  |
| ENSG00000277288 | 4.574978792 | 0           | 4.526450167  | 0.023716922 | 0.055031681 | C10orf142  |
| ENSG00000224429 | 28.66288198 | 10.92502156 | 1.399154575  | 0.023716937 | 0.055031681 | LINC00539  |
| ENSG00000133640 | 6.089106767 | 23.55973506 | -1.954858984 | 0.023748492 | 0.055084194 | LRRIQ1     |
| ENSG00000197872 | 483.4305027 | 133.1554573 | 1.85922835   | 0.023749311 | 0.055084194 | FAM49A     |
| ENSG00000100249 | 4.569964197 | 0           | 4.525028875  | 0.023750169 | 0.055084194 | C22orf31   |
| ENSG00000228339 | 4.569964197 | 0           | 4.525028875  | 0.023750169 | 0.055084194 | AMD1P1     |
| ENSG00000102290 | 4.569964197 | 0           | 4.525028875  | 0.023750169 | 0.055084194 | PCDH11X    |
| ENSG00000232040 | 0           | 4.656232136 | -4.800827298 | 0.02380761  | 0.055212489 | ZBED9      |
| ENSG00000138413 | 829.4441986 | 1377.152861 | -0.731623609 | 0.023830671 | 0.055261038 | IDH1       |
| ENSG00000090263 | 394.2707022 | 609.9211669 | -0.629878624 | 0.023849783 | 0.055300263 | MRPS33     |
| ENSG00000164118 | 478.7485977 | 332.8615327 | 0.525174509  | 0.023851843 | 0.055300263 | CEP44      |
| ENSG00000285632 | 31.03653158 | 7.510727594 | 2.061919165  | 0.023855918 | 0.055303847 | AC084024.4 |
| ENSG00000175582 | 3732.220583 | 2598.783126 | 0.522332381  | 0.023857647 | 0.055303847 | RAB6A      |
| ENSG00000168405 | 173.7032719 | 43.04328117 | 2.010019436  | 0.023915547 | 0.055433119 | CMAHP      |
| ENSG00000126768 | 490.9914597 | 692.872044  | -0.497072995 | 0.023931768 | 0.055465767 | TIMM17B    |
| novel.166       | 24.02529167 | 4.770786122 | 2.311872583  | 0.023953839 | 0.05551197  | -          |
| ENSG00000150764 | 1189.416172 | 677.6797612 | 0.811358942  | 0.023975891 | 0.055558119 | DIXDC1     |
| ENSG00000141994 | 283.9928719 | 420.8356778 | -0.567559954 | 0.023988228 | 0.05558175  | DUS3L      |
| novel.795       | 59.39642826 | 117.5805313 | -0.984490666 | 0.024000386 | 0.055604961 | -          |
| ENSG00000091490 | 317.2960764 | 1094.245917 | -1.78625694  | 0.024018054 | 0.055640933 | SEL1L3     |
| ENSG00000185104 | 630.658608  | 925.3001809 | -0.553333483 | 0.024025917 | 0.055654186 | FAF1       |
| ENSG00000137473 | 0.307102255 | 5.911222933 | -4.18828424  | 0.024032    | 0.055662713 | TTC29      |
| ENSG00000287307 | 5.18166141  | 0           | 4.70640044   | 0.024033883 | 0.055662713 | AC005772.2 |
| ENSG00000231920 | 11.15479105 | 1.345879667 | 3.006737051  | 0.024037653 | 0.055666483 | NEBL-AS1   |

|                 |             |             |              |             |             |            |
|-----------------|-------------|-------------|--------------|-------------|-------------|------------|
| ENSG00000154478 | 5.520247426 | 0           | 4.797187975  | 0.024044964 | 0.055678451 | GPR26      |
| ENSG00000238165 | 9.892390973 | 1.823989131 | 2.454011665  | 0.024051661 | 0.055688994 | AC007560.1 |
| ENSG00000101850 | 3.60707321  | 13.97331991 | -1.949932828 | 0.024060123 | 0.055703623 | GPR143     |
| ENSG00000253161 | 11.98812824 | 58.8431931  | -2.296264124 | 0.024083103 | 0.055751857 | LINC01605  |
| ENSG00000232855 | 18.44966989 | 3.088436538 | 2.55755196   | 0.0240984   | 0.055782299 | AF165147.1 |
| ENSG00000143751 | 447.5370524 | 631.7580974 | -0.497151921 | 0.024116587 | 0.055819426 | SDE2       |
| ENSG00000170921 | 899.2709103 | 1860.391146 | -1.048629479 | 0.024148418 | 0.055888122 | TANC2      |
| ENSG00000120820 | 705.1412935 | 339.6862806 | 1.053408531  | 0.02415621  | 0.055901176 | GLT8D2     |
| ENSG00000268199 | 0           | 4.800183434 | -4.840319135 | 0.024190012 | 0.055974413 | AC010335.1 |
| ENSG00000155959 | 722.7551787 | 1091.113486 | -0.594482284 | 0.024199959 | 0.055992442 | VBP1       |
| ENSG00000273403 | 4.50065716  | 0           | 4.505178651  | 0.024216458 | 0.056025628 | AC107294.3 |
| ENSG00000169427 | 4.499403511 | 0           | 4.504819563  | 0.024225015 | 0.056040434 | KCNK9      |
| ENSG00000255284 | 99.30618782 | 148.4388726 | -0.579049665 | 0.024300165 | 0.056205312 | AP006621.3 |
| ENSG00000091704 | 7.062026944 | 0.356539013 | 4.190384852  | 0.024300615 | 0.056205312 | CPA1       |
| ENSG00000260588 | 24.35495961 | 6.624300959 | 1.865159228  | 0.02433536  | 0.056280665 | AC027702.1 |
| ENSG00000162692 | 428.4988021 | 90.3590415  | 2.244505642  | 0.024338192 | 0.056281056 | VCAM1      |
| ENSG00000223855 | 28.75142103 | 6.73513053  | 2.106922793  | 0.024339862 | 0.056281056 | AC147651.1 |
| ENSG00000105518 | 528.5749792 | 287.652527  | 0.878665982  | 0.02434873  | 0.056296553 | TMEM205    |
| novel.141       | 0           | 4.882899962 | -4.872487154 | 0.024378755 | 0.056358115 | -          |
| ENSG00000182552 | 303.7051831 | 453.3727727 | -0.57864008  | 0.024379695 | 0.056358115 | RWDD4      |
| ENSG00000159761 | 147.6879775 | 76.70652348 | 0.947653037  | 0.024382623 | 0.05635987  | C16orf86   |
| ENSG00000253549 | 9.022768891 | 1.029478846 | 3.095989438  | 0.024398299 | 0.056391087 | CA3-AS1    |
| ENSG00000074319 | 948.5154103 | 1362.130426 | -0.522242928 | 0.0244117   | 0.056417042 | TSG101     |
| ENSG00000288022 | 1.17296339  | 11.89185298 | -3.31953844  | 0.02444091  | 0.056479523 | AC117488.1 |
| ENSG00000250012 | 23.49662036 | 4.801467703 | 2.272487631  | 0.024455002 | 0.056507062 | AC079848.1 |
| ENSG00000197226 | 210.5452008 | 338.4491152 | -0.684897911 | 0.024476147 | 0.05655089  | TBC1D9B    |
| ENSG00000063322 | 1605.757262 | 1165.348159 | 0.46228341   | 0.024498612 | 0.056597763 | MED29      |
| ENSG00000236352 | 6.550835796 | 0.356539013 | 4.085902249  | 0.024513557 | 0.056627255 | AC005220.1 |
| ENSG00000119912 | 440.6340546 | 669.7505707 | -0.604463544 | 0.024530834 | 0.056661661 | IDE        |
| ENSG00000272733 | 8.784973673 | 0.672939833 | 3.651244395  | 0.024533286 | 0.056661661 | AP000345.2 |
| ENSG00000185532 | 92.42890305 | 264.2578738 | -1.515485314 | 0.024534994 | 0.056661661 | PRKG1      |
| ENSG00000253720 | 5.718965719 | 0.387220594 | 3.888762749  | 0.024543794 | 0.056676946 | AC022973.2 |
| ENSG00000205424 | 0           | 7.671408756 | -5.519686469 | 0.024553301 | 0.056693859 | AL592528.1 |
| ENSG00000101096 | 468.117989  | 159.8796077 | 1.550913259  | 0.024565674 | 0.056717389 | NFATC2     |
| ENSG00000052126 | 477.6654263 | 294.6554907 | 0.697685897  | 0.024568528 | 0.056718937 | PLEKHA5    |
| ENSG00000272402 | 17.62657535 | 5.83911889  | 1.603400755  | 0.024624771 | 0.056841358 | AL031775.2 |
| ENSG00000245864 | 6.832722533 | 0.356539013 | 4.146775501  | 0.024625932 | 0.056841358 | MEF2C-AS2  |
| ENSG00000145757 | 16.32760565 | 5.737617535 | 1.508665069  | 0.024640381 | 0.056869658 | SPATA9     |
| ENSG00000270558 | 22.06043277 | 9.029056784 | 1.293319914  | 0.024646069 | 0.056877734 | AC025449.1 |
| ENSG00000124357 | 2184.112467 | 1623.785866 | 0.427553045  | 0.024655087 | 0.056893492 | NAGK       |
| ENSG00000164342 | 272.5461924 | 86.55161916 | 1.653127695  | 0.024688151 | 0.056964729 | TLR3       |
| ENSG00000029363 | 1950.552832 | 2610.935772 | -0.420759492 | 0.024708974 | 0.057007712 | BCLAF1     |
| ENSG00000170677 | 1364.54234  | 761.5561035 | 0.841709726  | 0.024722409 | 0.057033644 | SOCS6      |
| novel.99        | 28.17719109 | 12.55546459 | 1.165784051  | 0.024738202 | 0.057065012 | -          |
| ENSG00000116688 | 1891.45379  | 2534.030416 | -0.422061202 | 0.024762569 | 0.057116149 | MFN2       |
| ENSG00000283141 | 7.149925249 | 0.356539013 | 4.211703501  | 0.024828621 | 0.057263419 | LINC02666  |
| ENSG00000272902 | 21.03869122 | 6.899279318 | 1.613468205  | 0.024836395 | 0.057276263 | TBC1D8-AS1 |
| novel.378       | 0.922560414 | 10.57665489 | -3.523387052 | 0.024838785 | 0.057276691 | -          |
| ENSG00000165633 | 556.2446077 | 203.7876238 | 1.448811671  | 0.024841881 | 0.057278746 | VSTM4      |
| ENSG00000173237 | 0           | 4.821536799 | -4.856068191 | 0.024853527 | 0.057300514 | C11orf86   |
| ENSG00000228107 | 10.93719676 | 1.793307549 | 2.607077395  | 0.024874126 | 0.057342917 | AP000692.1 |

|                 |             |             |              |             |             |            |
|-----------------|-------------|-------------|--------------|-------------|-------------|------------|
| ENSG00000099377 | 138.5161384 | 78.87455975 | 0.811475806  | 0.024890298 | 0.057375107 | HSD3B7     |
| ENSG00000236882 | 17.7286198  | 4.575955752 | 1.941810987  | 0.024921545 | 0.057438398 | LINC01554  |
| ENSG00000156502 | 352.4426273 | 534.4930297 | -0.600432306 | 0.02492491  | 0.057438398 | SUPV3L1    |
| ENSG00000175040 | 827.6010703 | 2498.122042 | -1.593913824 | 0.024925122 | 0.057438398 | CHST2      |
| ENSG00000205238 | 11.7425264  | 36.23407317 | -1.620488289 | 0.024926598 | 0.057438398 | SPDYE2     |
| ENSG00000105771 | 607.5286525 | 818.2793522 | -0.429808828 | 0.0249649   | 0.057521557 | SMG9       |
| ENSG00000279175 | 0.308355904 | 5.248895586 | -4.016771133 | 0.024978489 | 0.057547762 | AL033543.1 |
| ENSG00000177272 | 7.37790474  | 0.387220594 | 4.253545968  | 0.024982954 | 0.057547844 | KCNA3      |
| ENSG00000156171 | 906.9802043 | 627.2727737 | 0.532279219  | 0.024982954 | 0.057547844 | DRAM2      |
| ENSG00000241634 | 4.282991593 | 16.1515363  | -1.92033191  | 0.024987738 | 0.05755376  | AC069499.1 |
| ENSG0000023228  | 127.5820181 | 267.1376226 | -1.065756408 | 0.025010607 | 0.057601328 | NDUFS1     |
| ENSG00000243147 | 724.7664657 | 997.7648    | -0.461089991 | 0.025014458 | 0.05760509  | MRPL33     |
| ENSG00000245849 | 247.0468345 | 130.1433503 | 0.92574477   | 0.025016727 | 0.05760521  | RAD51-AS1  |
| ENSG00000135253 | 13.33473695 | 49.86707035 | -1.900339377 | 0.025029353 | 0.057629175 | KCP        |
| novel.304       | 366.3336013 | 205.721719  | 0.832756947  | 0.02505315  | 0.057678856 | -          |
| ENSG00000265810 | 5.367771944 | 0           | 4.759621404  | 0.02505619  | 0.057679879 | MIR3907    |
| ENSG00000227500 | 1114.386858 | 1578.082022 | -0.501837635 | 0.025058412 | 0.057679879 | SCAMP4     |
| ENSG00000246082 | 42.76777513 | 19.13847149 | 1.155912867  | 0.025060255 | 0.057679879 | NUDT16P1   |
| ENSG00000166329 | 5.362757349 | 0           | 4.75837637   | 0.025090508 | 0.057744396 | CCDC182    |
| ENSG00000279901 | 0.601596751 | 6.063474966 | -3.328915348 | 0.025093592 | 0.057746378 | AC092117.2 |
| ENSG00000142875 | 886.2984887 | 520.4749478 | 0.767665723  | 0.025106541 | 0.057771061 | PRKACB     |
| ENSG00000131480 | 11.25307455 | 29.90648912 | -1.411204032 | 0.025128845 | 0.057817262 | AOC2       |
| ENSG00000115163 | 127.0774084 | 335.5319855 | -1.401239085 | 0.025143834 | 0.057846625 | CENPA      |
| ENSG00000284237 | 19.52330959 | 4.178122672 | 2.208951942  | 0.025178171 | 0.057920493 | AL356275.1 |
| ENSG00000286938 | 9.984334959 | 1.742556871 | 2.495538256  | 0.025184662 | 0.057930298 | AC092849.3 |
| ENSG00000008196 | 8.623936114 | 0           | 5.441296285  | 0.025187264 | 0.057931153 | TFAP2B     |
| ENSG00000238000 | 17.9223235  | 38.63553694 | -1.107872107 | 0.025190068 | 0.057932473 | AC116347.1 |
| ENSG00000112290 | 266.7801734 | 421.6592343 | -0.659997308 | 0.025211578 | 0.057974717 | WASF1      |
| ENSG00000258017 | 32.99441022 | 7.867395001 | 2.068456928  | 0.025212899 | 0.057974717 | AC011603.2 |
| ENSG00000287427 | 5.216906117 | 0           | 4.715471618  | 0.025223843 | 0.057994749 | AL390236.1 |
| ENSG00000148965 | 0           | 7.529640814 | -5.4908637   | 0.025226251 | 0.057995152 | SAA4       |
| ENSG00000119707 | 3505.473877 | 2250.478698 | 0.639390322  | 0.025243184 | 0.058028947 | RBM25      |
| ENSG00000279917 | 0           | 3.9336975   | -4.557743589 | 0.02524958  | 0.058038515 | AC079331.2 |
| ENSG00000277879 | 37.4327406  | 17.51979682 | 1.094378353  | 0.025257161 | 0.058050805 | AL391988.1 |
| ENSG00000151876 | 176.6629763 | 110.5272018 | 0.674957849  | 0.025321696 | 0.058193983 | FBXO4      |
| ENSG00000171135 | 569.061492  | 793.253918  | -0.479127179 | 0.025333958 | 0.058217015 | JAGN1      |
| ENSG00000237491 | 64.72218905 | 26.13925216 | 1.308361634  | 0.025351062 | 0.058251166 | AL669831.5 |
| ENSG00000204572 | 10.41207293 | 0.774441189 | 3.807608949  | 0.025388529 | 0.058332099 | KRTAP5-10  |
| ENSG00000131051 | 5389.32669  | 4061.317295 | 0.408104218  | 0.025395387 | 0.058342696 | RBM39      |
| ENSG00000260196 | 17.70591158 | 44.73239043 | -1.341986798 | 0.0254035   | 0.058353456 | AC124798.1 |
| ENSG00000279320 | 20.14628964 | 4.984401318 | 2.010599865  | 0.025404563 | 0.058353456 | AC069528.2 |
| ENSG00000267251 | 8.192152463 | 1.467450118 | 2.499853571  | 0.025434546 | 0.058417163 | AC139100.1 |
| ENSG00000260339 | 10.3833812  | 1.406086955 | 2.867460773  | 0.025452111 | 0.058452339 | HEXA-AS1   |
| ENSG00000176542 | 383.6272601 | 239.419063  | 0.680805047  | 0.025494453 | 0.058544403 | USF3       |
| ENSG00000162377 | 308.655361  | 483.6474065 | -0.648579214 | 0.025524984 | 0.058609335 | COA7       |
| ENSG00000286289 | 8.306804669 | 0           | 5.387253618  | 0.025528959 | 0.058613281 | AL133482.1 |
| ENSG00000225511 | 165.8759609 | 66.86370486 | 1.308280676  | 0.025551837 | 0.058660623 | LINC00475  |
| ENSG00000151498 | 677.9505036 | 480.2230483 | 0.497644533  | 0.025566121 | 0.058688231 | ACAD8      |
| novel.772       | 5.824842383 | 0           | 4.874857128  | 0.025582085 | 0.058719688 | -          |
| ENSG00000142634 | 1113.677912 | 1858.452928 | -0.738845068 | 0.025585819 | 0.05872307  | EFHD2      |
| ENSG00000175467 | 1498.989005 | 2021.294603 | -0.431152133 | 0.025594088 | 0.05873686  | SART1      |

|                 |             |             |              |             |             |              |
|-----------------|-------------|-------------|--------------|-------------|-------------|--------------|
| ENSG00000095485 | 390.8061191 | 556.9517427 | -0.511280235 | 0.025625578 | 0.058799391 | CWF19L1      |
| ENSG00000120690 | 908.8208796 | 586.311648  | 0.631944339  | 0.025625861 | 0.058799391 | ELF1         |
| ENSG00000280213 | 20.03518492 | 49.61986671 | -1.306030055 | 0.02565144  | 0.058852884 | UCKL1-AS1    |
| ENSG00000088256 | 1463.470616 | 2202.435854 | -0.589766232 | 0.02566443  | 0.058877488 | GNA11        |
| ENSG00000173674 | 1439.28416  | 2282.574929 | -0.665369428 | 0.025668759 | 0.058882219 | EIF1AX       |
| ENSG00000090686 | 1096.980528 | 1522.87124  | -0.473071321 | 0.025668785 | 0.058920868 | USP48        |
| ENSG00000106266 | 1022.992388 | 1440.853093 | -0.493931842 | 0.025696144 | 0.058934632 | SNX8         |
| ENSG00000229116 | 7.932902674 | 0.672939833 | 3.500135924  | 0.025709657 | 0.058960419 | AL137026.1   |
| ENSG00000107816 | 2310.358234 | 3064.786015 | -0.407596727 | 0.025717956 | 0.058974247 | LZTS2        |
| ENSG00000110906 | 1404.551175 | 2011.149018 | -0.517946842 | 0.025725872 | 0.058987192 | KCTD10       |
| ENSG00000177463 | 1127.435634 | 736.2732037 | 0.614896651  | 0.025731601 | 0.058995121 | NR2C2        |
| ENSG00000080709 | 5.44968674  | 0.336469917 | 3.8181183    | 0.025751895 | 0.05903644  | KCNN2        |
| ENSG00000155428 | 24.76006063 | 8.804829102 | 1.482644886  | 0.025765501 | 0.059062422 | TRIM74       |
| ENSG00000213949 | 1526.440886 | 1068.275631 | 0.514700352  | 0.025801912 | 0.059140668 | ITGA1        |
| novel.175       | 12.94446625 | 2.587817834 | 2.341591613  | 0.025842022 | 0.059227379 | -            |
| ENSG00000164520 | 0.308355904 | 5.430673325 | -4.059021613 | 0.025861859 | 0.059267616 | RAET1E       |
| ENSG00000207614 | 0.307102255 | 5.430673325 | -4.059021785 | 0.025867143 | 0.059274496 | MIR193A      |
| ENSG00000286970 | 9.726410089 | 1.456837632 | 2.748828869  | 0.025875226 | 0.059287791 | AC010491.2   |
| ENSG00000111203 | 625.5490623 | 375.7155057 | 0.7353212    | 0.0258842   | 0.059303123 | ITFG2        |
| ENSG00000137672 | 68.09082631 | 16.36772004 | 2.052558721  | 0.02590642  | 0.059348796 | TRPC6        |
| ENSG00000259251 | 5.518993777 | 0           | 4.796926915  | 0.025912054 | 0.059351856 | AC104590.1   |
| ENSG00000277957 | 0           | 4.585412363 | -4.780834855 | 0.025914567 | 0.059351856 | SENP3-EIF4A1 |
| ENSG00000280913 | 5.119876265 | 0           | 4.690419722  | 0.025914609 | 0.059351856 | CTSLP3       |
| ENSG00000229204 | 2.152223082 | 12.01599197 | -2.492507982 | 0.025918032 | 0.059354462 | PTGES3P3     |
| ENSG00000196544 | 193.0252138 | 111.4315141 | 0.791487148  | 0.025938803 | 0.059396796 | BORCS6       |
| ENSG00000198092 | 5.111100724 | 0           | 4.688145047  | 0.025978442 | 0.059482322 | TMPRSS11F    |
| novel.988       | 9.986842256 | 1.518200796 | 2.758892733  | 0.025990288 | 0.059501984 | -            |
| ENSG00000249592 | 59.06389702 | 105.2358091 | -0.832231598 | 0.02599161  | 0.059501984 | AC139887.2   |
| ENSG00000138074 | 353.0481557 | 583.2827084 | -0.724683409 | 0.026048144 | 0.059626152 | SLC5A6       |
| ENSG00000139133 | 35.5690285  | 69.68045509 | -0.973657233 | 0.026080515 | 0.059694993 | ALG10        |
| ENSG00000224470 | 1030.960694 | 722.5156011 | 0.513157159  | 0.026084929 | 0.059698211 | ATXN1L       |
| ENSG00000287269 | 0           | 4.850934111 | -4.854388734 | 0.026087053 | 0.059698211 | Z82215.1     |
| ENSG00000104883 | 109.1374066 | 55.70803427 | 0.969895908  | 0.026088815 | 0.059698211 | PEX11G       |
| ENSG00000196632 | 88.04781394 | 43.55485068 | 1.02036783   | 0.026094305 | 0.059703152 | WNK3         |
| ENSG00000278611 | 40.00797179 | 19.38161239 | 1.045195123  | 0.026095569 | 0.059703152 | ZNF426-DT    |
| ENSG00000186666 | 79.24571611 | 44.52681918 | 0.828723305  | 0.026102697 | 0.05971051  | BCDIN3D      |
| ENSG00000167487 | 352.4079086 | 193.1391344 | 0.866108717  | 0.026103382 | 0.05971051  | KLHL26       |
| ENSG00000285588 | 5.124962131 | 0           | 4.691748454  | 0.026111675 | 0.05972422  | AL160254.1   |
| ENSG00000187855 | 8.60763868  | 0           | 5.438664165  | 0.026125824 | 0.059748586 | ASCL4        |
| ENSG00000124593 | 50.32838547 | 27.06722965 | 0.890895594  | 0.026126927 | 0.059748586 | AL365205.1   |
| ENSG00000189143 | 7.25823794  | 19.98360405 | -1.457050058 | 0.026132287 | 0.059755585 | CLDN4        |
| ENSG0000024048  | 1005.853085 | 716.3663272 | 0.489802318  | 0.026134673 | 0.05975578  | UBR2         |
| ENSG00000137776 | 1960.515402 | 1401.059503 | 0.484617958  | 0.026161594 | 0.059812071 | SLTM         |
| ENSG00000249609 | 13.50322513 | 2.395427609 | 2.467462533  | 0.026171866 | 0.059830291 | AC080188.1   |
| ENSG00000115970 | 416.6023949 | 656.3927275 | -0.656278173 | 0.026185456 | 0.05985609  | THADA        |
| ENSG00000134030 | 48.50994727 | 112.5027194 | -1.215897188 | 0.026193341 | 0.059868847 | CTIF         |
| ENSG00000129204 | 50.75229122 | 12.99716028 | 1.955491675  | 0.026216599 | 0.059916737 | USP6         |
| novel.789       | 19.30174054 | 2.802717299 | 2.772460298  | 0.026244453 | 0.059975119 | -            |
| novel.616       | 7.585541117 | 22.24569285 | -1.553302817 | 0.0262732   | 0.060035534 | -            |
| ENSG00000276368 | 0           | 3.953766596 | -4.564204704 | 0.026281877 | 0.060050079 | HIST1H2AJ    |
| ENSG00000185437 | 20.34751524 | 4.505135979 | 2.159215948  | 0.026308776 | 0.06010593  | SH3BGR       |

|                 |             |             |              |             |             |            |
|-----------------|-------------|-------------|--------------|-------------|-------------|------------|
| ENSG0000006377  | 6.116758311 | 0.356539013 | 3.983172658  | 0.026310948 | 0.06010593  | DLX6       |
| ENSG00000246523 | 20.82575551 | 7.776506131 | 1.413047127  | 0.026321937 | 0.060125748 | AP001528.1 |
| ENSG00000165323 | 5.853747575 | 28.8604088  | -2.305887021 | 0.026336335 | 0.060153347 | FAT3       |
| ENSG00000139352 | 5.336288183 | 0           | 4.751720703  | 0.026347339 | 0.060173191 | ASCL1      |
| ENSG00000188766 | 115.3361509 | 258.5027557 | -1.163251366 | 0.026351344 | 0.060174817 | SPRED3     |
| ENSG00000251095 | 4.525872677 | 0           | 4.512405016  | 0.026353179 | 0.060174817 | AC093866.1 |
| ENSG00000169375 | 724.1695706 | 1025.122873 | -0.501115725 | 0.026355    | 0.060174817 | SIN3A      |
| ENSG00000109511 | 2.708474665 | 23.25181055 | -3.102554845 | 0.026386886 | 0.060242328 | ANXA10     |
| ENSG00000272086 | 61.54865134 | 23.29182035 | 1.394713482  | 0.026394317 | 0.060253998 | AC025181.2 |
| ENSG00000171448 | 237.7980796 | 149.8707609 | 0.667522105  | 0.026411688 | 0.060288356 | ZBTB26     |
| ENSG00000101888 | 210.4472733 | 133.8202592 | 0.651446025  | 0.026433045 | 0.060331805 | NXT2       |
| ENSG00000066629 | 362.4589282 | 756.6481264 | -1.061602452 | 0.026464214 | 0.060397641 | EML1       |
| ENSG00000142459 | 598.7410137 | 967.1085026 | -0.691533001 | 0.026482276 | 0.060433554 | EVI5L      |
| ENSG00000005020 | 500.157486  | 826.5846838 | -0.725183316 | 0.026485716 | 0.060436097 | SKAP2      |
| ENSG00000094841 | 338.6202185 | 235.4603821 | 0.524914369  | 0.026497214 | 0.060457023 | UPRT       |
| ENSG00000250938 | 17.82160397 | 4.259554931 | 2.059313816  | 0.026523707 | 0.060512156 | AC073475.1 |
| ENSG00000159958 | 31.1628939  | 11.18951583 | 1.478658813  | 0.02653803  | 0.060539516 | TNFRSF13C  |
| ENSG00000138050 | 261.8138403 | 179.8375045 | 0.542568848  | 0.026557801 | 0.0605793   | THUMP2     |
| ENSG00000005339 | 1374.711387 | 1021.631093 | 0.428172314  | 0.026587764 | 0.060642323 | CREBBP     |
| ENSG00000272695 | 24.30237728 | 102.0865233 | -2.07145622  | 0.026594681 | 0.060652774 | GAS6-DT    |
| ENSG00000140598 | 268.0221157 | 393.7219698 | -0.554645541 | 0.026603321 | 0.060667153 | EFL1       |
| ENSG00000287762 | 8.314326561 | 0           | 5.388530389  | 0.026618929 | 0.06069742  | AC108050.1 |
| ENSG00000255920 | 27.11859517 | 10.99596973 | 1.29724771   | 0.026637211 | 0.060733776 | CCND2-AS1  |
| ENSG00000242419 | 1.802282956 | 10.77289792 | -2.580868255 | 0.026669449 | 0.060801945 | PCDHGC4    |
| ENSG00000071655 | 1472.703261 | 2090.041995 | -0.505203742 | 0.026677748 | 0.060811934 | MBD3       |
| ENSG00000164022 | 812.1852879 | 1132.263067 | -0.479615387 | 0.026678512 | 0.060811934 | AIMP1      |
| ENSG00000149050 | 41.66662608 | 20.96361649 | 0.986912509  | 0.026692485 | 0.060838446 | ZNF214     |
| ENSG00000130193 | 297.6648265 | 150.4540617 | 0.982605693  | 0.026701136 | 0.060852826 | THEM6      |
| ENSG00000234690 | 5.483677798 | 0.387220594 | 3.825894197  | 0.026740373 | 0.06093156  | EPCAM-DT   |
| ENSG00000167711 | 5.483677798 | 0.387220594 | 3.825894197  | 0.026740373 | 0.06093156  | SERPINF2   |
| ENSG00000258489 | 4.5888402   | 0           | 4.530480987  | 0.026747026 | 0.060941375 | AC027013.1 |
| ENSG00000249931 | 5.478663203 | 0.387220594 | 3.824754596  | 0.026760378 | 0.060966449 | GOLGA8K    |
| ENSG00000243504 | 4.585079253 | 0           | 4.529409994  | 0.026768634 | 0.06097991  | RPS23P1    |
| ENSG00000053900 | 736.2376918 | 483.6247216 | 0.605810581  | 0.026780822 | 0.061002326 | ANAPC4     |
| ENSG00000133275 | 1674.015121 | 2378.16309  | -0.506446571 | 0.02678343  | 0.061002918 | CSNK1G2    |
| ENSG00000244301 | 1.233423615 | 10.35371148 | -3.081531364 | 0.026789989 | 0.061012509 | AOX3P      |
| ENSG00000143473 | 3.297463658 | 19.69112514 | -2.578137071 | 0.026792719 | 0.061013377 | KCNH1      |
| ENSG00000028116 | 182.4592695 | 300.687175  | -0.72137721  | 0.026805715 | 0.061037623 | VRK2       |
| ENSG00000081059 | 592.0251975 | 215.3278052 | 1.459889164  | 0.026813527 | 0.06105006  | TCF7       |
| ENSG00000236308 | 10.17177041 | 1.069617038 | 3.24487349   | 0.026826374 | 0.06107396  | AL138921.2 |
| ENSG00000036448 | 11.84206354 | 2.813329785 | 2.058732415  | 0.026833724 | 0.061085341 | MYOM2      |
| ENSG00000287188 | 27.70514813 | 10.80229524 | 1.361432348  | 0.026840667 | 0.061095791 | AC068989.1 |
| ENSG00000147130 | 634.4350955 | 938.3093754 | -0.564225401 | 0.026876358 | 0.061171674 | ZMYM3      |
| ENSG00000173546 | 2307.467912 | 4007.37769  | -0.796280998 | 0.026900037 | 0.061220204 | CSPG4      |
| ENSG00000081307 | 680.5899563 | 963.2002459 | -0.501213916 | 0.026913923 | 0.061239842 | UBA5       |
| ENSG00000124920 | 909.717877  | 348.126373  | 1.386344011  | 0.026915062 | 0.061239842 | MYRF       |
| ENSG00000286379 | 11.2782188  | 31.16738769 | -1.471002253 | 0.026915737 | 0.061239842 | AL591845.2 |
| ENSG00000283897 | 14.60591257 | 2.406040094 | 2.577825573  | 0.027031973 | 0.061498923 | AC011416.3 |
| ENSG00000287117 | 5.408102518 | 0.387220594 | 3.80856604   | 0.027041591 | 0.061515416 | AC105916.1 |
| ENSG00000105146 | 38.66713313 | 14.25544313 | 1.446696814  | 0.027056841 | 0.06154472  | AURKC      |
| ENSG00000163935 | 145.9107678 | 74.18803122 | 0.972676616  | 0.027062509 | 0.061552223 | SFMBT1     |



|                 |             |             |              |             |             |            |
|-----------------|-------------|-------------|--------------|-------------|-------------|------------|
| ENSG00000231500 | 23.38329308 | 48.80053543 | -1.062537065 | 0.027079695 | 0.061585921 | RPS18      |
| ENSG00000130856 | 453.4743411 | 268.6292983 | 0.755512759  | 0.027085842 | 0.061594509 | ZNF236     |
| ENSG00000166337 | 283.6412508 | 475.8693802 | -0.746491845 | 0.027101971 | 0.061622349 | TAF10      |
| ENSG00000287814 | 5.089646153 | 0           | 4.682521109  | 0.02710555  | 0.061622349 | AC011407.1 |
| ENSG00000272745 | 5.089646153 | 0           | 4.682521109  | 0.02710555  | 0.061622349 | AC004948.1 |
| ENSG00000213700 | 12.1516731  | 29.59227166 | -1.281267796 | 0.027107572 | 0.061622349 | RPL17P50   |
| ENSG00000280407 | 10.55444795 | 28.35760674 | -1.424524471 | 0.027121916 | 0.061649562 | AC132872.4 |
| ENSG00000158792 | 277.9494388 | 156.6227156 | 0.827728895  | 0.027126564 | 0.061653494 | SPATA2L    |
| ENSG00000225921 | 981.3678301 | 1536.189044 | -0.646661016 | 0.027128392 | 0.061653494 | NOL7       |
| ENSG00000176476 | 187.0389782 | 111.457491  | 0.745337956  | 0.027139212 | 0.061672691 | SGF29      |
| ENSG00000121210 | 118.886624  | 197.6917162 | -0.734285322 | 0.027162082 | 0.061719262 | TMEM131L   |
| ENSG00000247796 | 54.42240322 | 94.3238873  | -0.79528632  | 0.027177294 | 0.061748428 | AC008966.1 |
| ENSG00000162843 | 23.29052272 | 2.323323566 | 3.352495127  | 0.027205248 | 0.061806537 | WDR64      |
| ENSG00000187688 | 188.1404825 | 421.5439693 | -1.164523544 | 0.027236063 | 0.061871134 | TRPV2      |
| ENSG00000278768 | 158.4060137 | 82.96007692 | 0.936064062  | 0.027246249 | 0.061888861 | BACE1-AS   |
| ENSG00000155761 | 21.11935236 | 3.404837359 | 2.611019097  | 0.027251261 | 0.061894835 | SPAG17     |
| ENSG00000277283 | 78.37176361 | 41.46803674 | 0.915287096  | 0.027284702 | 0.061965371 | AC004812.2 |
| ENSG00000197124 | 127.4449862 | 67.45135963 | 0.916468515  | 0.027303868 | 0.062003479 | ZNF682     |
| ENSG00000258545 | 7.914026672 | 1.10029862  | 2.863657595  | 0.027314334 | 0.062021823 | RHOXF1-AS1 |
| ENSG00000227671 | 474.138588  | 289.4598671 | 0.712749164  | 0.027324708 | 0.062039957 | AL390728.4 |
| ENSG00000198556 | 242.988374  | 158.6608335 | 0.613600178  | 0.027353157 | 0.062099125 | ZNF789     |
| ENSG00000267142 | 5.220667063 | 0           | 4.716492081  | 0.02737324  | 0.062137382 | AC092296.3 |
| ENSG00000236814 | 35.58163626 | 63.95905385 | -0.847190402 | 0.027376558 | 0.06214139  | AC046176.1 |
| ENSG00000113811 | 1240.624859 | 839.2236238 | 0.564167292  | 0.027395161 | 0.062178185 | SELENOK    |
| ENSG00000173064 | 1541.886865 | 960.9296211 | 0.682374722  | 0.02740669  | 0.062197908 | HECTD4     |
| ENSG00000145945 | 276.3824991 | 175.6902389 | 0.653300761  | 0.027408639 | 0.062197908 | FAM50B     |
| ENSG00000279221 | 4.485542104 | 0           | 4.50071875   | 0.027413752 | 0.062204078 | AC068254.2 |
| ENSG00000251008 | 4.501910809 | 0           | 4.505460342  | 0.027428797 | 0.062219935 | ORAOV1P1   |
| ENSG00000156574 | 4.501910809 | 0           | 4.505460342  | 0.027428797 | 0.062219935 | NODAL      |
| ENSG00000239732 | 4.501910809 | 0           | 4.505460342  | 0.027428797 | 0.062219935 | TLR9       |
| ENSG00000286764 | 5.213145171 | 0           | 4.714564984  | 0.02743032  | 0.062219935 | AC188617.2 |
| ENSG00000130427 | 4.237646425 | 0           | 4.417029469  | 0.027436021 | 0.062226008 | EPO        |
| ENSG00000274349 | 115.3235432 | 56.12966086 | 1.036516194  | 0.027437787 | 0.062226008 | ZNF658     |
| ENSG00000203876 | 27.11734152 | 11.34305213 | 1.252024819  | 0.027450807 | 0.062250103 | ADD3-AS1   |
| ENSG00000182944 | 4208.920152 | 6447.463386 | -0.615265255 | 0.027454559 | 0.062253177 | EWSR1      |
| ENSG00000006283 | 5.224428009 | 29.72201445 | -2.509817768 | 0.027462073 | 0.062261082 | CACNA1G    |
| ENSG00000235313 | 3.619680969 | 12.25913287 | -1.75595581  | 0.027462838 | 0.062261082 | HM13-IT1   |
| ENSG00000287723 | 4.889674211 | 0           | 4.622387169  | 0.027485882 | 0.062307887 | AP005901.6 |
| ENSG00000146221 | 12.20579381 | 1.834601616 | 2.747360159  | 0.02749056  | 0.062313056 | TCTE1      |
| ENSG00000125459 | 262.4048102 | 426.0848302 | -0.699343329 | 0.027516578 | 0.06236659  | MSTO1      |
| ENSG00000127947 | 3743.208516 | 2181.999784 | 0.778761549  | 0.027538985 | 0.062406543 | PTPN12     |
| ENSG00000276107 | 21.22981635 | 46.31293469 | -1.124419603 | 0.02753901  | 0.062406543 | AC037198.1 |
| ENSG00000244413 | 4.222531369 | 0           | 4.412423732  | 0.027560131 | 0.062448095 | RPL23AP56  |
| ENSG00000172785 | 355.498547  | 204.9439385 | 0.794507012  | 0.027562153 | 0.062448095 | CBWD1      |
| ENSG00000237594 | 0.61420451  | 7.66439229  | -3.657486789 | 0.027570513 | 0.062461589 | AP000251.1 |
| ENSG00000242960 | 113.7336543 | 276.4930848 | -1.280953931 | 0.02757969  | 0.062473995 | FTH1P23    |
| ENSG00000169894 | 4.220024071 | 0           | 4.411662471  | 0.027580798 | 0.062473995 | MUC3A      |
| ENSG00000184319 | 276.2259063 | 420.3908528 | -0.605839116 | 0.027592088 | 0.062494119 | RPL23AP82  |
| ENSG00000250081 | 1.17296339  | 10.84487357 | -3.192851765 | 0.027600071 | 0.062506751 | AC025176.1 |
| ENSG00000259705 | 6.362146692 | 17.14203283 | -1.432024369 | 0.027621427 | 0.062549665 | AC084757.3 |
| ENSG00000130035 | 8.880678605 | 1.060160428 | 3.052848983  | 0.027627904 | 0.062558879 | GALNT8     |

|                 |             |             |              |             |             |            |
|-----------------|-------------|-------------|--------------|-------------|-------------|------------|
| ENSG00000196455 | 425.8220872 | 617.2638666 | -0.535458636 | 0.027639375 | 0.062579399 | PIK3R4     |
| ENSG00000028277 | 370.0521063 | 1401.593806 | -1.921192388 | 0.027652799 | 0.062604336 | POU2F2     |
| ENSG00000183760 | 41.3525714  | 156.8515068 | -1.92332895  | 0.02772723  | 0.062768491 | ACP7       |
| ENSG00000245910 | 1167.488779 | 842.3365898 | 0.470805168  | 0.027748872 | 0.062810895 | SNHG6      |
| ENSG00000182853 | 140.1087043 | 37.80615394 | 1.886368288  | 0.027751814 | 0.062812081 | VMO1       |
| ENSG00000269889 | 1.232169966 | 10.20030357 | -3.063094568 | 0.02777194  | 0.062852158 | AC078802.1 |
| ENSG00000112667 | 774.3222593 | 1109.181781 | -0.518476634 | 0.02780116  | 0.062912806 | DNPH1      |
| ENSG00000106443 | 630.9233713 | 401.1175952 | 0.652687769  | 0.027831771 | 0.062976592 | PHF14      |
| ENSG00000243678 | 28.48024766 | 68.99219806 | -1.276550327 | 0.027857646 | 0.063025303 | NME2       |
| ENSG00000215196 | 0.894837599 | 7.317181494 | -3.014976936 | 0.027858149 | 0.063025303 | BASP1-AS1  |
| ENSG00000282728 | 8.000956063 | 0           | 5.333103075  | 0.02787428  | 0.063056305 | PGR-AS1    |
| ENSG00000134453 | 2106.853967 | 1488.906285 | 0.500864223  | 0.027882286 | 0.063068925 | RBM17      |
| ENSG00000169398 | 1431.873919 | 2175.947319 | -0.603587193 | 0.027898486 | 0.063100074 | PTK2       |
| ENSG00000273899 | 83.27321921 | 151.8477384 | -0.867789319 | 0.027922062 | 0.06314248  | NOL12      |
| ENSG00000243368 | 18.09339025 | 4.485066883 | 1.992917357  | 0.027922095 | 0.06314248  | MCCC1-AS1  |
| ENSG00000266877 | 0           | 4.004517274 | -4.580414211 | 0.027928409 | 0.063149742 | AC007923.4 |
| ENSG00000259614 | 7.388974116 | 0.356539013 | 4.259718052  | 0.027930168 | 0.063149742 | AC087477.6 |
| ENSG00000274376 | 8.002209711 | 0           | 5.333322161  | 0.027934662 | 0.063154407 | ADAMTS7P1  |
| ENSG00000237125 | 50.32251632 | 5.63483191  | 3.166919447  | 0.027951807 | 0.063187671 | HAND2-AS1  |
| ENSG00000065923 | 326.6034532 | 872.6372179 | -1.417830425 | 0.02796232  | 0.063205936 | SLC9A7     |
| ENSG00000257086 | 6.691957167 | 20.26932329 | -1.599007065 | 0.027991725 | 0.0632669   | AP001453.4 |
| ENSG00000035928 | 816.7553505 | 1152.306048 | -0.496637308 | 0.028013069 | 0.063309634 | RFC1       |
| novel.554       | 45.87704789 | 15.75357483 | 1.546556462  | 0.028016084 | 0.063310939 | -          |
| ENSG00000280378 | 13.55616346 | 3.586615098 | 1.918491455  | 0.028021489 | 0.063317647 | AL353898.3 |
| novel.881       | 6.767461177 | 0           | 5.091310408  | 0.028033423 | 0.063339105 | -          |
| ENSG00000010270 | 789.4998663 | 1034.618892 | -0.390184008 | 0.028041823 | 0.063349852 | STARD3NL   |
| ENSG00000234773 | 15.07022017 | 4.697526203 | 1.687106195  | 0.028043057 | 0.063349852 | AC012618.3 |
| ENSG00000229017 | 7.94934265  | 0.723690511 | 3.463655641  | 0.028070592 | 0.063406543 | LINC01277  |
| ENSG00000198799 | 454.1834947 | 317.3834498 | 0.517412994  | 0.028076319 | 0.063413965 | LRIG2      |
| ENSG00000196123 | 343.8710162 | 507.6709016 | -0.561475501 | 0.028093781 | 0.063447891 | KIAA0895L  |
| ENSG00000143376 | 1131.985383 | 783.6952179 | 0.530934232  | 0.028137448 | 0.063540986 | SNX27      |
| ENSG00000133055 | 12.06606863 | 2.129777466 | 2.495409932  | 0.02814618  | 0.063555179 | MYBPH      |
| ENSG00000276600 | 100.6069803 | 39.11480228 | 1.363814349  | 0.028159273 | 0.06357922  | RAB7B      |
| ENSG00000279164 | 0           | 7.111738639 | -5.408730791 | 0.028171479 | 0.063601251 | AL118508.2 |
| ENSG00000154814 | 116.1827366 | 198.1021352 | -0.771408419 | 0.02819315  | 0.063644645 | OXNAD1     |
| ENSG00000176490 | 63.497355   | 125.6112572 | -0.985092998 | 0.028208976 | 0.063674839 | DIRAS1     |
| ENSG00000144320 | 584.2314193 | 804.8497301 | -0.462239225 | 0.02821991  | 0.063693988 | LNPK       |
| ENSG00000242628 | 13.48184183 | 2.893606169 | 2.226031312  | 0.028244336 | 0.06374082  | AC009228.1 |
| ENSG00000228812 | 7.29097535  | 0.693008929 | 3.361723222  | 0.02824638  | 0.06374082  | LAMA5-AS1  |
| ENSG00000268362 | 80.92442913 | 137.3548394 | -0.763598766 | 0.02824802  | 0.06374082  | AC092279.1 |
| ENSG00000272321 | 9.441944783 | 1.069617038 | 3.135064898  | 0.028272265 | 0.06378587  | AP003355.2 |
| ENSG00000258376 | 94.83651657 | 23.19617958 | 2.02948895   | 0.028272895 | 0.06378587  | AC004846.1 |
| ENSG00000277247 | 5.15895319  | 0.387220594 | 3.738524702  | 0.028302492 | 0.0638471   | AC083809.1 |
| ENSG00000279748 | 7.54897149  | 1.049547942 | 2.823686144  | 0.0283078   | 0.063851004 | AC008764.9 |
| ENSG00000080802 | 452.4292777 | 326.6358823 | 0.469876951  | 0.028309138 | 0.063851004 | CNOT4      |
| ENSG00000161904 | 1311.92427  | 1796.819112 | -0.453600674 | 0.028330636 | 0.063893946 | LEMD2      |
| ENSG00000110436 | 39.43424005 | 13.01478923 | 1.592442388  | 0.028344001 | 0.063913403 | SLC1A2     |
| ENSG00000273257 | 8.72193488  | 1.386017859 | 2.626125137  | 0.028344183 | 0.063913403 | AC069200.1 |
| ENSG00000109771 | 103.5497465 | 59.50454015 | 0.802533583  | 0.028349131 | 0.063919011 | LRP2BP     |
| ENSG00000139921 | 928.6028268 | 1468.329272 | -0.661287459 | 0.028392447 | 0.064011121 | TMX1       |
| ENSG00000196456 | 293.3767928 | 196.8274137 | 0.57622383   | 0.028399941 | 0.064022462 | ZNF775     |

|                 |             |             |              |             |             |            |
|-----------------|-------------|-------------|--------------|-------------|-------------|------------|
| ENSG00000172469 | 336.7090096 | 496.3685481 | -0.560441526 | 0.028424788 | 0.064072914 | MANEA      |
| novel.501       | 57.40678112 | 22.4614914  | 1.359748416  | 0.028428729 | 0.064076239 | -          |
| ENSG00000227158 | 0.616711807 | 13.18454182 | -4.426238504 | 0.028444643 | 0.064106547 | AC073621.1 |
| ENSG00000105327 | 514.3595372 | 292.6810133 | 0.813438766  | 0.028450284 | 0.064113699 | BBC3       |
| ENSG00000165525 | 515.5615772 | 700.626109  | -0.442539436 | 0.028473355 | 0.064160126 | NEMF       |
| ENSG00000108840 | 1600.610234 | 2310.58313  | -0.529477457 | 0.028481167 | 0.064172162 | HDAC5      |
| ENSG00000111716 | 455.993284  | 816.0545686 | -0.839837559 | 0.028488618 | 0.064183384 | LDHB       |
| ENSG00000127080 | 87.89325808 | 148.2911969 | -0.753836473 | 0.0284974   | 0.064197603 | IPPK       |
| ENSG00000136870 | 443.5226567 | 283.8885946 | 0.643102659  | 0.028504639 | 0.064208342 | ZNF189     |
| ENSG00000086967 | 4.764921544 | 0           | 4.588176037  | 0.028510672 | 0.064216366 | MYBPC2     |
| ENSG00000148832 | 44.98450412 | 22.17474468 | 1.025016162  | 0.02851474  | 0.06421996  | PAOX       |
| ENSG00000122965 | 594.8766445 | 844.8600433 | -0.506115442 | 0.028520739 | 0.064225216 | RBM19      |
| ENSG00000198815 | 1228.600976 | 838.2139778 | 0.551953     | 0.028522018 | 0.064225216 | FOXJ3      |
| ENSG00000153015 | 363.0203377 | 549.4036082 | -0.597903081 | 0.028536197 | 0.064251575 | CWC27      |
| ENSG00000137968 | 11.13591505 | 1.345879667 | 3.006462761  | 0.028548757 | 0.064274285 | SLC44A5    |
| ENSG00000228874 | 4.590093848 | 0           | 4.530884593  | 0.028577333 | 0.064333046 | AC090954.1 |
| ENSG00000225279 | 8.954715503 | 1.110911105 | 3.03795325   | 0.028584695 | 0.064344044 | AL121987.1 |
| ENSG00000235072 | 5.531530264 | 0           | 4.800045586  | 0.028592928 | 0.064357002 | AC012074.1 |
| ENSG00000118804 | 20.80591059 | 53.83774239 | -1.372378084 | 0.028597487 | 0.064361686 | STBD1      |
| ENSG00000240694 | 247.4851103 | 65.06936983 | 1.925820636  | 0.028618268 | 0.064402879 | PNMA2      |
| ENSG00000233665 | 4.583825605 | 0           | 4.529093773  | 0.028630999 | 0.064425948 | AC060234.2 |
| ENSG00000130487 | 33.66874678 | 8.191968162 | 2.048568435  | 0.028654643 | 0.064473566 | KLHDC7B    |
| ENSG00000272269 | 11.18251387 | 25.32454438 | -1.175733508 | 0.028695501 | 0.064559908 | AL138724.1 |
| ENSG00000166295 | 1951.798279 | 1451.826066 | 0.426878241  | 0.028703584 | 0.064572501 | ANAPC16    |
| ENSG00000238365 | 0.879722543 | 8.173183336 | -3.193927458 | 0.028713249 | 0.064581108 | RNU7-57P   |
| ENSG00000267366 | 4.252761481 | 0           | 4.421637332  | 0.02871367  | 0.064581108 | AP005131.2 |
| ENSG00000147471 | 841.3675953 | 529.9111787 | 0.666358999  | 0.02871575  | 0.064581108 | PLPBP      |
| ENSG00000239470 | 9.365115854 | 23.52178022 | -1.325172508 | 0.028717353 | 0.064581108 | AC011979.1 |
| ENSG00000226578 | 4.247746886 | 0           | 4.420116771  | 0.028757386 | 0.064665539 | AL132657.1 |
| ENSG00000149930 | 1494.036007 | 2023.25673  | -0.43733264  | 0.028765678 | 0.064678588 | TAOK2      |
| novel.815       | 29.00766497 | 5.901766323 | 2.287158262  | 0.028784264 | 0.064713633 | -          |
| ENSG00000169629 | 52.58111461 | 28.57481796 | 0.878074229  | 0.028786246 | 0.064713633 | RGPD8      |
| ENSG00000143502 | 7.200285013 | 0.743759607 | 3.309123606  | 0.02881481  | 0.064763636 | SUSD4      |
| ENSG00000267515 | 7.683468612 | 0.336469917 | 4.315897076  | 0.028815134 | 0.064763636 | AP001029.3 |
| ENSG00000261192 | 4.562371034 | 0           | 4.522914854  | 0.028815967 | 0.064763636 | RNF126P1   |
| ENSG00000271882 | 17.09170707 | 4.566499142 | 1.89140758   | 0.02884647  | 0.064826584 | AP001330.5 |
| ENSG00000240563 | 74.75111338 | 15.48232088 | 2.265939344  | 0.028853583 | 0.064836961 | L1TD1      |
| ENSG00000144034 | 304.8208778 | 438.5384082 | -0.525167365 | 0.028879444 | 0.06488946  | TPRKB      |
| ENSG00000255987 | 4.553595492 | 0           | 4.520396365  | 0.028892092 | 0.064912265 | TOMM20P2   |
| ENSG00000231185 | 13.17126336 | 39.19893148 | -1.578103591 | 0.028905841 | 0.064937541 | SPRY4-AS1  |
| ENSG00000115267 | 652.1211473 | 420.0373488 | 0.634548016  | 0.028908359 | 0.064937582 | IFIH1      |
| ENSG00000234337 | 7.900165265 | 20.13829623 | -1.351203969 | 0.028918963 | 0.064955786 | AC026462.1 |
| ENSG00000279800 | 8.232483037 | 21.94106039 | -1.416989949 | 0.028930305 | 0.064975645 | BCLAF1P2   |
| ENSG00000061987 | 1386.228556 | 999.2906117 | 0.472226249  | 0.028941613 | 0.064990926 | MON2       |
| ENSG00000166734 | 2672.530659 | 1901.788662 | 0.490885327  | 0.028942112 | 0.064990926 | CASC4      |
| ENSG00000137077 | 8.005970658 | 0           | 5.333990244  | 0.028976381 | 0.065062254 | CCL21      |
| ENSG00000179941 | 488.4882841 | 350.8436078 | 0.477268406  | 0.028979627 | 0.06506392  | BBS10      |
| ENSG00000030582 | 4149.351034 | 7723.462529 | -0.896341142 | 0.028997254 | 0.065093467 | GRN        |
| ENSG00000282936 | 21.1883034  | 44.9023998  | -1.086619833 | 0.028997798 | 0.065093467 | AC004706.3 |
| ENSG00000114054 | 521.2884055 | 806.1321108 | -0.629016485 | 0.029018396 | 0.065134077 | PCCB       |
| ENSG00000250073 | 10.29269086 | 2.496928964 | 2.03872819   | 0.029025025 | 0.065143329 | AP000866.2 |

|                 |             |             |              |             |             |             |
|-----------------|-------------|-------------|--------------|-------------|-------------|-------------|
| ENSG0000064270  | 5.138823539 | 19.72753891 | -1.940280711 | 0.029030593 | 0.065150197 | ATP2C2      |
| ENSG00000149582 | 468.8948845 | 293.5733946 | 0.674528992  | 0.029039969 | 0.065161137 | TMEM25      |
| ENSG00000163913 | 465.1786166 | 767.2113466 | -0.721950026 | 0.029041415 | 0.065161137 | IFT122      |
| ENSG00000236028 | 6.120590528 | 0.356539013 | 3.98408624   | 0.029042992 | 0.065161137 | AL354766.2  |
| ENSG00000188994 | 1255.087476 | 721.6027996 | 0.798822039  | 0.029051564 | 0.065171242 | ZNF292      |
| ENSG00000197056 | 229.9621355 | 342.5439266 | -0.574367191 | 0.029053965 | 0.065171242 | ZMYM1       |
| ENSG00000115353 | 9.181512616 | 1.049547942 | 3.10722104   | 0.029057134 | 0.065171242 | TACR1       |
| ENSG00000283674 | 6.67677084  | 0.387220594 | 4.110799247  | 0.029060335 | 0.065171242 | AC068587.4  |
| ENSG00000184557 | 3163.979347 | 1134.300218 | 1.479892462  | 0.029062123 | 0.065171242 | SOCS3       |
| ENSG00000156030 | 1032.071033 | 659.4133198 | 0.646573486  | 0.029062546 | 0.065171242 | ELMSAN1     |
| ENSG00000198626 | 4.207416313 | 0           | 4.407778048  | 0.029112541 | 0.065270854 | RYR2        |
| ENSG00000234715 | 4.207416313 | 0           | 4.407778048  | 0.029112541 | 0.065270854 | AC005064.1  |
| ENSG00000235590 | 4.135601978 | 25.9937598  | -2.643157216 | 0.029116462 | 0.065270854 | GNAS-AS1    |
| ENSG00000273216 | 11.52582974 | 0.672939833 | 4.054595295  | 0.029123311 | 0.065270854 | AC002059.1  |
| ENSG00000158022 | 4.206162664 | 0           | 4.407395341  | 0.029123685 | 0.065270854 | TRIM63      |
| ENSG00000237188 | 4.206162664 | 0           | 4.407395341  | 0.029123685 | 0.065270854 | AC242426.2  |
| ENSG00000037757 | 347.3099855 | 488.7421581 | -0.492982524 | 0.029124553 | 0.065270854 | MRI1        |
| ENSG00000234465 | 161.5968453 | 95.07423101 | 0.767425919  | 0.02913023  | 0.065277946 | PINLYP      |
| ENSG00000274363 | 9.515012766 | 1.029478846 | 3.172740941  | 0.029167404 | 0.065355612 | AC087742.1  |
| ENSG00000233397 | 0           | 3.882946823 | -4.541312319 | 0.029172957 | 0.065356782 | AC008063.2  |
| ENSG00000152611 | 0           | 3.882946823 | -4.541312319 | 0.029172957 | 0.065356782 | CAPSL       |
| ENSG00000215009 | 1.845120827 | 15.62956423 | -3.086232521 | 0.02921085  | 0.065436032 | ACSM4       |
| ENSG00000137486 | 573.2666524 | 227.1752476 | 1.335869397  | 0.029228827 | 0.065470657 | ARRB1       |
| ENSG00000107249 | 354.5044882 | 822.8901298 | -1.214552094 | 0.029270638 | 0.065558659 | GLIS3       |
| ENSG00000179981 | 422.3827307 | 232.5080625 | 0.861228592  | 0.029274559 | 0.06556179  | TSHZ1       |
| ENSG00000274512 | 48.98447004 | 13.69705728 | 1.840509884  | 0.029284108 | 0.065577522 | TBC1D3L     |
| ENSG00000249216 | 5.221920712 | 0           | 4.716862736  | 0.029309455 | 0.065622971 | AC105389.2  |
| ENSG00000204959 | 5.221920712 | 0           | 4.716862736  | 0.029309455 | 0.065622971 | ARHGEF34P   |
| ENSG00000023697 | 463.2651699 | 814.3051567 | -0.814134786 | 0.029327924 | 0.065656571 | DERA        |
| ENSG00000234969 | 8.102715775 | 1.029478846 | 2.940272235  | 0.029329516 | 0.065656571 | AL627389.1  |
| ENSG00000278816 | 6.952389334 | 0.693008929 | 3.293387687  | 0.029337931 | 0.06566975  | AL121890.5  |
| novel.823       | 28.81786476 | 58.67220343 | -1.024563432 | 0.029372543 | 0.065741561 | -           |
| ENSG00000078549 | 72.43229615 | 0           | 8.512119436  | 0.029391559 | 0.065777047 | ADCYAP1R1   |
| ENSG00000179059 | 0           | 4.485066883 | -4.751727166 | 0.029393461 | 0.065777047 | ZFP42       |
| ENSG00000250829 | 7.846044555 | 0           | 5.305851757  | 0.029423321 | 0.065838197 | AC108865.1  |
| ENSG00000281731 | 13.61920225 | 3.260757667 | 2.068072543  | 0.029440937 | 0.06587194  | METTL14-DT  |
| ENSG00000138443 | 1704.38102  | 1173.142456 | 0.538628892  | 0.02946231  | 0.065914085 | ABI2        |
| ENSG00000183765 | 244.1703546 | 372.8673847 | -0.611139828 | 0.029466604 | 0.065918016 | CHEK2       |
| ENSG00000148541 | 41.7942417  | 9.96764676  | 2.065443762  | 0.02950252  | 0.065991264 | FAM13C      |
| ENSG00000285971 | 4.484288455 | 0           | 4.500292259  | 0.029504427 | 0.065991264 | AC023095.1  |
| ENSG00000285621 | 7.494779509 | 0.693008929 | 3.404643897  | 0.029544436 | 0.066075062 | AL138999.2  |
| ENSG00000236144 | 148.3666601 | 232.2440478 | -0.647012561 | 0.029584234 | 0.066158373 | TMEM147-AS1 |
| ENSG00000259494 | 88.31110941 | 137.3604903 | -0.63763927  | 0.029601248 | 0.066185325 | MRPL46      |
| ENSG00000167483 | 25.75561775 | 8.458902575 | 1.59844085   | 0.029601381 | 0.066185325 | FAM129C     |
| novel.836       | 13.53728746 | 1.682349583 | 2.972773481  | 0.029615793 | 0.06621185  | -           |
| ENSG00000168772 | 13.60283355 | 2.904218654 | 2.234640425  | 0.029660561 | 0.066306234 | CXXC4       |
| ENSG00000153885 | 377.6772351 | 905.6559065 | -1.262011444 | 0.029666203 | 0.06631314  | KCTD15      |
| ENSG00000268061 | 24.52985857 | 9.234499639 | 1.404473938  | 0.029704792 | 0.066393685 | NAPA-AS1    |
| ENSG00000079805 | 2642.313979 | 3636.989639 | -0.460871734 | 0.029709332 | 0.066398122 | DNM2        |
| ENSG00000143570 | 7.638408178 | 23.63299498 | -1.636146054 | 0.029725284 | 0.066428059 | SLC39A1     |
| ENSG00000110200 | 65.0939394  | 109.8035113 | -0.755437776 | 0.029753241 | 0.066484817 | ANAPC15     |

|                 |             |             |              |             |             |            |
|-----------------|-------------|-------------|--------------|-------------|-------------|------------|
| ENSG00000257489 | 5.174068246 | 0.387220594 | 3.742167638  | 0.029771743 | 0.066520439 | AC010203.1 |
| ENSG00000087995 | 261.721825  | 409.9010709 | -0.648015343 | 0.029782453 | 0.066538646 | METTLL2A   |
| ENSG00000151491 | 1458.22464  | 5053.918631 | -1.793235993 | 0.029790481 | 0.066550859 | EPS8       |
| ENSG00000275111 | 151.126962  | 95.39885135 | 0.66559629   | 0.029800094 | 0.066566609 | ZNF2       |
| ENSG00000215788 | 580.1209619 | 320.5186901 | 0.856750884  | 0.029820763 | 0.066607052 | TNFRSF25   |
| ENSG00000156886 | 17.25887033 | 1.386017859 | 3.621229421  | 0.029835368 | 0.066633946 | ITGAD      |
| ENSG00000109272 | 5.232021173 | 39.93007082 | -2.936550097 | 0.029856747 | 0.066675962 | PF4V1      |
| ENSG00000273008 | 25.84261841 | 11.07740199 | 1.218594012  | 0.029864291 | 0.066687078 | AC010864.1 |
| ENSG00000122406 | 12100.16925 | 16662.29147 | -0.461565111 | 0.029872268 | 0.066699157 | RPL5       |
| ENSG00000136271 | 1115.834914 | 1794.915539 | -0.685886278 | 0.029913296 | 0.066785026 | DDX56      |
| ENSG00000008118 | 7.396780743 | 40.97648946 | -2.472155911 | 0.029921603 | 0.066797832 | CAMK1G     |
| ENSG00000273492 | 5.174068246 | 0.356539013 | 3.742171238  | 0.029928539 | 0.066807576 | AP000229.1 |
| ENSG00000224543 | 23.55059888 | 45.27631098 | -0.939467119 | 0.029941985 | 0.066831849 | SNRPGP15   |
| ENSG00000050628 | 5.67362055  | 0.387220594 | 3.878497539  | 0.029948129 | 0.06683982  | PTGER3     |
| ENSG00000092850 | 13.49187102 | 2.261960402 | 2.6049966    | 0.02999004  | 0.066927609 | TEKT2      |
| ENSG00000143314 | 1020.679199 | 1448.624885 | -0.505382382 | 0.030013168 | 0.066973472 | MRPL24     |
| ENSG00000101940 | 2455.924451 | 1659.485789 | 0.565721225  | 0.030016773 | 0.066975763 | WDR13      |
| ENSG00000179292 | 2.40137241  | 13.70522962 | -2.504193845 | 0.03002169  | 0.066980981 | TMEM151A   |
| ENSG00000283537 | 0.293240848 | 5.534614825 | -4.094200757 | 0.030048427 | 0.067034876 | AC073264.3 |
| ENSG00000272282 | 9.746539741 | 1.722487775 | 2.468307498  | 0.030054081 | 0.067041735 | LINC02084  |
| ENSG00000115641 | 1447.216463 | 5888.377833 | -2.024622841 | 0.030058922 | 0.067046776 | FHL2       |
| ENSG00000285796 | 156.9067873 | 88.31445507 | 0.82981295   | 0.03008449  | 0.067095999 | AL162458.1 |
| ENSG00000176024 | 96.08931404 | 61.67702435 | 0.639077295  | 0.030086155 | 0.067095999 | ZNF613     |
| ENSG00000115457 | 4966.772119 | 1112.251007 | 2.158722862  | 0.030098807 | 0.067118453 | IGFBP2     |
| ENSG00000143353 | 480.9130291 | 353.9494637 | 0.442259666  | 0.030110302 | 0.067138325 | LYPLAL1    |
| ENSG00000243710 | 18.00388229 | 2.355289417 | 2.906597943  | 0.030118671 | 0.067145967 | CFAP57     |
| ENSG00000118298 | 35.67107295 | 7.916861409 | 2.18364297   | 0.030118898 | 0.067145967 | CA14       |
| ENSG00000145248 | 11.46314695 | 1.548882377 | 2.935985072  | 0.030135678 | 0.06717761  | SLC10A4    |
| ENSG00000138801 | 1351.872263 | 1767.597026 | -0.386772028 | 0.030176888 | 0.067263702 | PAPSS1     |
| ENSG00000111412 | 562.2540121 | 830.7856069 | -0.563684926 | 0.030212782 | 0.067337933 | C12orf49   |
| ENSG00000116132 | 509.89315   | 1992.593925 | -1.966433002 | 0.030218756 | 0.067345471 | PRRX1      |
| novel.49        | 25.23726072 | 8.579317151 | 1.553780353  | 0.030222087 | 0.067347117 | -          |
| novel.496       | 4.27672335  | 32.81422258 | -2.942251178 | 0.030231367 | 0.067362019 | -          |
| ENSG00000287245 | 19.83639536 | 6.888666832 | 1.532926745  | 0.030241137 | 0.067378011 | AP001981.2 |
| ENSG00000211598 | 4.911057511 | 0           | 4.628256145  | 0.030253796 | 0.067394657 | IGKV4-1    |
| ENSG00000224810 | 4.911057511 | 0           | 4.628256145  | 0.030253796 | 0.067394657 | AL355482.1 |
| ENSG00000182093 | 615.6805731 | 431.8789306 | 0.511053564  | 0.030292417 | 0.067474904 | WRB        |
| ENSG00000258572 | 9.426829727 | 1.161661783 | 3.075839181  | 0.030299875 | 0.067485732 | AL133467.1 |
| ENSG00000002745 | 50.5901422  | 15.83513548 | 1.67578996   | 0.030319093 | 0.067522746 | WNT16      |
| ENSG00000134775 | 1201.253563 | 481.929714  | 1.318060954  | 0.030351797 | 0.067589786 | FHOD3      |
| ENSG00000251161 | 15.49956779 | 2.742510011 | 2.475145861  | 0.030357232 | 0.067596095 | AC020661.1 |
| ENSG00000103657 | 1468.572646 | 1048.725139 | 0.485796805  | 0.030399089 | 0.067683496 | HERC1      |
| ENSG00000196453 | 341.853105  | 473.0816555 | -0.468529334 | 0.030408721 | 0.067699142 | ZNF777     |
| ENSG00000134242 | 140.1519416 | 62.59626874 | 1.165818068  | 0.030417422 | 0.067708888 | PTPN22     |
| ENSG00000285534 | 4.826635418 | 0           | 4.605157235  | 0.030418948 | 0.067708888 | AL163541.1 |
| ENSG00000286416 | 17.83664776 | 5.952517001 | 1.569171459  | 0.030420917 | 0.067708888 | AL442067.3 |
| ENSG00000005483 | 1375.656114 | 906.9823206 | 0.601258534  | 0.030460891 | 0.067792053 | KMT2E      |
| ENSG00000287346 | 2.128261214 | 13.2096196  | -2.6401881   | 0.030478586 | 0.067825623 | AL132712.2 |
| ENSG00000263731 | 37.00339298 | 15.92962037 | 1.211588305  | 0.030490899 | 0.067847211 | AC145207.5 |
| ENSG00000214223 | 164.8935538 | 267.4654663 | -0.698437997 | 0.030526027 | 0.06791956  | HNRNPA1P10 |
| ENSG00000260852 | 119.1356308 | 68.15262211 | 0.805116669  | 0.030548909 | 0.067964653 | FBXL19-AS1 |

|                 |             |             |              |             |             |               |
|-----------------|-------------|-------------|--------------|-------------|-------------|---------------|
| ENSG00000151176 | 1288.070683 | 1915.038968 | -0.572091258 | 0.030583239 | 0.068035202 | PLBD2         |
| ENSG00000287335 | 0           | 4.208804254 | -4.658177248 | 0.030601164 | 0.068069251 | AL139351.3    |
| ENSG00000267254 | 131.746569  | 75.48503959 | 0.804499489  | 0.030654012 | 0.068180969 | ZNF790-AS1    |
| ENSG00000119335 | 4691.414008 | 6631.259053 | -0.499312611 | 0.030657639 | 0.068183198 | SET           |
| ENSG00000169228 | 145.8278129 | 233.1828477 | -0.677048945 | 0.030663634 | 0.068190694 | RAB24         |
| ENSG00000224057 | 0.922560414 | 8.67020602  | -3.242336391 | 0.030666526 | 0.068191288 | EGFR-AS1      |
| ENSG00000267280 | 103.8716356 | 202.0090386 | -0.95915874  | 0.030708992 | 0.068279873 | TBX2-AS1      |
| ENSG00000136059 | 245.9444158 | 156.8768542 | 0.647481437  | 0.030711974 | 0.068280661 | VILL          |
| ENSG00000206530 | 283.7188355 | 134.8945341 | 1.074314738  | 0.030727951 | 0.068310335 | CFAP44        |
| ENSG00000164037 | 31.32608275 | 12.38198759 | 1.33385445   | 0.030772324 | 0.068403126 | SLC9B1        |
| ENSG00000137727 | 215.8200877 | 54.94484754 | 1.971869738  | 0.030776068 | 0.068405598 | ARHGAP20      |
| ENSG00000196517 | 50.57036891 | 100.9374474 | -0.999098185 | 0.030812407 | 0.068480508 | SLC6A9        |
| ENSG00000226686 | 21.45654219 | 61.94408716 | -1.532542282 | 0.030832166 | 0.06851373  | LINC01535     |
| ENSG00000051382 | 298.3005568 | 417.8367515 | -0.486431123 | 0.030832629 | 0.06851373  | PIK3CB        |
| ENSG00000258643 | 5.141330836 | 16.30378833 | -1.662102083 | 0.030878496 | 0.068602072 | BCL2L2-PABPN1 |
| ENSG00000232504 | 9.141182043 | 1.803920035 | 2.344124133  | 0.030880248 | 0.068602072 | ST3GAL5-AS1   |
| ENSG00000197622 | 2805.564411 | 1881.892818 | 0.576242654  | 0.03088189  | 0.068602072 | CDC42SE1      |
| ENSG00000100911 | 564.8426187 | 1095.152619 | -0.955466044 | 0.030882947 | 0.068602072 | PSME2         |
| ENSG00000259867 | 11.51733894 | 2.954969332 | 1.98260443   | 0.030968747 | 0.068786784 | AC105411.1    |
| ENSG00000224281 | 45.29633624 | 16.64513854 | 1.435068467  | 0.031014498 | 0.068882515 | SLC25A5-AS1   |
| ENSG00000111321 | 2291.240374 | 3426.404801 | -0.580569597 | 0.031022861 | 0.068895201 | AC005840.1    |
| ENSG00000181915 | 936.3447744 | 579.5100179 | 0.692354854  | 0.031029887 | 0.068904913 | ADO           |
| ENSG00000135074 | 656.0700971 | 1196.205679 | -0.866427241 | 0.031040222 | 0.068921973 | ADAM19        |
| ENSG00000065518 | 1310.018602 | 1839.689721 | -0.489702725 | 0.031054005 | 0.068946685 | NDUFB4        |
| ENSG00000164967 | 244.322901  | 398.3230506 | -0.705668135 | 0.031059468 | 0.06895292  | RPP25L        |
| ENSG00000269653 | 0.293240848 | 5.512105584 | -4.078126825 | 0.0310696   | 0.068969521 | AC011479.3    |
| ENSG00000256001 | 0           | 4.503851709 | -4.746387463 | 0.031074719 | 0.06897499  | AC079949.1    |
| ENSG00000279108 | 28.29309694 | 11.3004738  | 1.330092759  | 0.031084091 | 0.068989901 | AC008537.3    |
| ENSG00000103275 | 1769.940336 | 2341.80259  | -0.40395868  | 0.031119657 | 0.069062938 | UBE2I         |
| ENSG00000139625 | 742.2601844 | 1202.106255 | -0.695270536 | 0.031158312 | 0.069142818 | MAP3K12       |
| ENSG00000152785 | 32.56286822 | 2.169915658 | 3.908833493  | 0.03119016  | 0.06920758  | BMP3          |
| ENSG00000270673 | 26.36237164 | 9.907439472 | 1.405498531  | 0.031202237 | 0.069228464 | YTHDF3-AS1    |
| ENSG00000094631 | 1504.95493  | 976.6646338 | 0.6239399    | 0.031247095 | 0.069322207 | HDAC6         |
| ENSG00000125875 | 1038.33837  | 1620.344808 | -0.641827923 | 0.031261444 | 0.069347983 | TBC1D20       |
| ENSG00000277763 | 8.265220447 | 0.774441189 | 3.476689782  | 0.03127006  | 0.069361173 | AL138995.1    |
| ENSG00000101367 | 2607.100474 | 3545.118354 | -0.44345686  | 0.031276247 | 0.069368975 | MAPRE1        |
| ENSG00000178082 | 34.21210587 | 61.30524935 | -0.8418713   | 0.031297327 | 0.069408158 | TWF1P1        |
| ENSG00000219487 | 4.796405305 | 0           | 4.596807636  | 0.031299256 | 0.069408158 | AL603766.1    |
| novel.853       | 9.411714671 | 35.10964271 | -1.90277217  | 0.031313938 | 0.069434788 | -             |
| ENSG00000119865 | 508.5145788 | 828.7306435 | -0.705039018 | 0.031323281 | 0.06944958  | CNRIP1        |
| ENSG00000235370 | 12.93311214 | 2.169915658 | 2.579775169  | 0.031336297 | 0.06947251  | DNM1P51       |
| ENSG00000275645 | 8.535824346 | 1.029478846 | 3.014704342  | 0.031363932 | 0.069527842 | AC068338.3    |
| ENSG00000167081 | 464.9189073 | 261.2090744 | 0.831726931  | 0.031377578 | 0.069552159 | PBX3          |
| ENSG00000264573 | 6.35329988  | 0.356539013 | 4.039534301  | 0.031390816 | 0.069575566 | RN7SL15P      |
| ENSG00000142733 | 549.4354256 | 850.8466748 | -0.631218098 | 0.031402206 | 0.069594875 | MAP3K6        |
| ENSG00000271709 | 0.307102255 | 4.637318915 | -3.834033503 | 0.031430221 | 0.06965102  | AC017033.1    |
| ENSG00000172354 | 4461.221202 | 6145.434303 | -0.46204701  | 0.03144105  | 0.069669077 | GNB2          |
| ENSG00000204802 | 7.212892771 | 0.672939833 | 3.364946723  | 0.03151194  | 0.069820205 | AL590399.1    |
| ENSG00000121716 | 51.33006865 | 87.09489775 | -0.762296109 | 0.031520586 | 0.069833405 | PILRB         |
| ENSG00000155330 | 293.9748699 | 200.7057842 | 0.549915982  | 0.031528578 | 0.069845156 | C16orf87      |
| ENSG00000140465 | 0.616711807 | 8.548507175 | -3.802302779 | 0.031549707 | 0.069886005 | CYP1A1        |

|                 |             |             |              |             |             |             |
|-----------------|-------------|-------------|--------------|-------------|-------------|-------------|
| ENSG00000276529 | 32.77584701 | 63.45270295 | -0.952412073 | 0.031571725 | 0.069928813 | AP001505.1  |
| ENSG00000213435 | 7.559071951 | 1.029478846 | 2.837413945  | 0.031576873 | 0.069934253 | ATP6V0CP3   |
| ENSG00000134376 | 15.06144462 | 2.659793482 | 2.531156155  | 0.031585768 | 0.069947992 | CRB1        |
| ENSG00000117586 | 135.1984735 | 48.97213305 | 1.461853949  | 0.031596079 | 0.069964862 | TNFSF4      |
| ENSG00000140743 | 8.25010539  | 21.94106039 | -1.414814468 | 0.031609089 | 0.069982157 | AC092338.1  |
| ENSG00000150760 | 1836.289453 | 1307.703368 | 0.489969736  | 0.031609276 | 0.069982157 | DOCK1       |
| ENSG00000267053 | 40.54828195 | 12.93078843 | 1.655898504  | 0.031614221 | 0.069987141 | AC092296.2  |
| ENSG00000235888 | 12.9482272  | 2.558292127 | 2.351559003  | 0.031624434 | 0.070003785 | AF064858.1  |
| ENSG00000160957 | 523.9327904 | 900.3633582 | -0.781030552 | 0.031713088 | 0.070194049 | RECQL4      |
| ENSG00000076513 | 962.0543234 | 712.5064979 | 0.43342078   | 0.03173285  | 0.070229361 | ANKRD13A    |
| ENSG00000107263 | 1719.343854 | 1273.358641 | 0.433406842  | 0.031734448 | 0.070229361 | RAPGEF1     |
| ENSG00000168291 | 1114.731811 | 1480.189182 | -0.409047469 | 0.031745406 | 0.070247627 | PDHB        |
| ENSG00000168026 | 155.5615745 | 87.55623016 | 0.831498905  | 0.03175473  | 0.070262275 | TTC21A      |
| ENSG00000184719 | 130.6327688 | 75.44759834 | 0.788888925  | 0.03177498  | 0.070301094 | RNLS        |
| ENSG00000287600 | 0.616711807 | 8.75163828  | -3.838343429 | 0.031796472 | 0.070342655 | AC122719.3  |
| ENSG00000189014 | 17.95255361 | 5.218214004 | 1.765022615  | 0.031833116 | 0.070415887 | SHLD2P3     |
| ENSG00000154727 | 785.9463009 | 583.5291757 | 0.429304328  | 0.031834995 | 0.070415887 | GABPA       |
| ENSG00000251450 | 10.10016954 | 0.387220594 | 4.707688765  | 0.03188347  | 0.070517105 | RASGRF2-AS1 |
| ENSG00000143178 | 67.76570225 | 37.40074364 | 0.859116962  | 0.031902516 | 0.070553224 | TBX19       |
| ENSG00000108958 | 7.810728576 | 20.51490434 | -1.388425748 | 0.031950859 | 0.07065412  | AC130689.1  |
| ENSG00000167257 | 188.1587185 | 278.2443404 | -0.56358328  | 0.031955315 | 0.070657961 | RNF214      |
| ENSG00000162888 | 3.620934617 | 11.90259386 | -1.712949392 | 0.03201281  | 0.070779066 | C1orf147    |
| ENSG00000222112 | 10.5582089  | 30.22160567 | -1.513942212 | 0.032022402 | 0.07079425  | RN7SKP16    |
| ENSG00000275437 | 3.344062475 | 13.1752136  | -1.976035266 | 0.03206384  | 0.070876842 | AL121832.3  |
| ENSG00000168314 | 4.218770422 | 0           | 4.411226579  | 0.032067945 | 0.070876842 | MOBP        |
| ENSG00000240665 | 4.218770422 | 0           | 4.411226579  | 0.032067945 | 0.070876842 | LSP1P2      |
| ENSG00000230521 | 7.557747031 | 0           | 5.251749967  | 0.032080185 | 0.070897863 | AL645929.1  |
| ENSG00000198853 | 1469.483468 | 2037.113381 | -0.471041189 | 0.032083283 | 0.070898679 | RUSC2       |
| ENSG00000279943 | 8.192152463 | 1.386017859 | 2.53318803   | 0.0321052   | 0.070940349 | AC110771.1  |
| ENSG00000149922 | 33.28710943 | 15.24478378 | 1.131937581  | 0.0321076   | 0.070940349 | TBX6        |
| ENSG00000166224 | 1045.90844  | 739.0044849 | 0.500666314  | 0.032124159 | 0.070970898 | SGPL1       |
| ENSG00000223969 | 9.602911072 | 24.86778828 | -1.371373374 | 0.032172631 | 0.071071944 | AC002456.1  |
| ENSG00000165699 | 1459.299708 | 855.7339505 | 0.770289085  | 0.03219075  | 0.071105597 | TSC1        |
| ENSG00000170430 | 557.3467583 | 299.7413718 | 0.893962054  | 0.032193339 | 0.071105597 | MGMT        |
| ENSG00000180914 | 922.3027848 | 249.6279025 | 1.88502407   | 0.032206045 | 0.071127614 | OXTR        |
| ENSG00000174151 | 380.8570998 | 274.236835  | 0.473594466  | 0.032214752 | 0.071140797 | CYB561D1    |
| ENSG00000205325 | 0           | 4.168666062 | -4.645670879 | 0.032241542 | 0.071193907 | AC005863.1  |
| ENSG00000182154 | 1333.050389 | 1797.698115 | -0.431406163 | 0.032255841 | 0.071215233 | MRPL41      |
| ENSG00000273402 | 15.83027591 | 3.698728939 | 2.114938538  | 0.032260172 | 0.071215233 | AC004908.3  |
| ENSG00000224420 | 20.3337251  | 7.908689068 | 1.362887698  | 0.032261043 | 0.071215233 | ADM5        |
| ENSG00000211694 | 5.223174361 | 0           | 4.717253457  | 0.032262165 | 0.071215233 | TRGV10      |
| ENSG00000267123 | 6.973843905 | 0.672939833 | 3.313880062  | 0.032269835 | 0.071226114 | SCAT1       |
| ENSG00000110274 | 654.0665196 | 949.7508249 | -0.53800261  | 0.032288824 | 0.071261971 | CEP164      |
| ENSG00000109576 | 371.5242673 | 197.3083956 | 0.912590147  | 0.03231076  | 0.071304328 | AADAT       |
| ENSG00000225953 | 16.78202625 | 55.66399609 | -1.729443536 | 0.032351802 | 0.071388838 | SATB2-AS1   |
| ENSG00000151164 | 22.31083575 | 5.830946549 | 1.917841637  | 0.032399289 | 0.071481616 | RAD9B       |
| ENSG00000260271 | 4.192301256 | 0           | 4.403049347  | 0.032402101 | 0.071481616 | AL132996.1  |
| ENSG00000228734 | 4.192301256 | 0           | 4.403049347  | 0.032402101 | 0.071481616 | AC096543.2  |
| ENSG00000279989 | 30.02962034 | 12.60621527 | 1.255493747  | 0.032414587 | 0.07150309  | AC011815.3  |
| ENSG00000212135 | 0.586481695 | 6.665595026 | -3.48393035  | 0.032423863 | 0.071512702 | SNORD67     |
| ENSG00000174749 | 177.4712402 | 316.3488467 | -0.834725191 | 0.03242445  | 0.071512702 | FAM241A     |

|                 |             |             |              |             |             |            |
|-----------------|-------------|-------------|--------------|-------------|-------------|------------|
| ENSG00000254744 | 4.888420562 | 0           | 4.622131736  | 0.032449778 | 0.071556415 | AC084855.1 |
| ENSG00000286510 | 4.888420562 | 0           | 4.622131736  | 0.032449778 | 0.071556415 | AC018695.8 |
| ENSG00000130332 | 816.6500162 | 1106.435465 | -0.4381997   | 0.032496076 | 0.071652427 | LSM7       |
| ENSG00000004766 | 452.0144322 | 326.2407462 | 0.469744835  | 0.032516969 | 0.07169241  | VPS50      |
| ENSG00000267281 | 50.78377498 | 24.15214172 | 1.078954104  | 0.032550074 | 0.071759311 | ATF7-NPFF  |
| ENSG00000105669 | 1508.951157 | 2228.828206 | -0.562606177 | 0.032558584 | 0.071771982 | COPE       |
| ENSG00000280132 | 48.60773257 | 26.33279826 | 0.887213439  | 0.032592203 | 0.071839995 | AC026471.6 |
| ENSG00000250318 | 45.0432125  | 18.27416891 | 1.302132731  | 0.032605523 | 0.071863259 | AC003072.1 |
| ENSG00000258813 | 9.142435692 | 1.069617038 | 3.088569065  | 0.032614703 | 0.071877394 | AL442663.3 |
| ENSG00000138686 | 328.0488758 | 515.4110408 | -0.651677951 | 0.032632605 | 0.071910748 | BBS7       |
| ENSG00000189369 | 214.610669  | 310.4692384 | -0.533470741 | 0.032665803 | 0.071977798 | GSPT2      |
| ENSG00000198833 | 1334.239406 | 1820.253389 | -0.448180833 | 0.032674851 | 0.071986121 | UBE2J1     |
| ENSG00000180458 | 0.879722543 | 8.112976048 | -3.185072048 | 0.032675121 | 0.071986121 | AC022148.1 |
| ENSG00000225649 | 106.7656792 | 27.52082209 | 1.95165883   | 0.032716066 | 0.072070214 | AC064875.1 |
| ENSG00000283930 | 24.41492163 | 4.962020471 | 2.295193595  | 0.032719704 | 0.072072117 | AL117339.5 |
| ENSG00000280355 | 43.16306043 | 19.42162219 | 1.159821205  | 0.032724435 | 0.072074144 | AL132656.4 |
| ENSG00000154874 | 24.68734865 | 60.60890119 | -1.297794515 | 0.032726172 | 0.072074144 | CCDC144B   |
| novel.1057      | 32.74715528 | 8.909926477 | 1.864224886  | 0.032741437 | 0.072101652 | -          |
| ENSG00000271192 | 0           | 4.350443801 | -4.701125889 | 0.032744726 | 0.072102782 | AC006058.2 |
| ENSG00000035862 | 18251.43994 | 12275.59215 | 0.572203388  | 0.032749713 | 0.072107653 | TIMP2      |
| ENSG00000112855 | 618.9576665 | 842.2092741 | -0.444279189 | 0.032758045 | 0.072119886 | HARS2      |
| ENSG00000125898 | 111.072747  | 177.7445731 | -0.678852138 | 0.032783806 | 0.072170485 | FAM110A    |
| ENSG00000253686 | 4.204909015 | 0           | 4.406939793  | 0.032787741 | 0.072173031 | LINC01484  |
| ENSG00000204262 | 5145.483273 | 8808.159784 | -0.77557034  | 0.032798068 | 0.072189648 | COL5A2     |
| ENSG00000188234 | 314.2240738 | 183.7963613 | 0.775372149  | 0.032836924 | 0.072269049 | AGAP4      |
| ENSG00000135976 | 268.6249104 | 133.4999584 | 1.009400066  | 0.032874505 | 0.072345631 | ANKRD36    |
| ENSG00000167005 | 1609.588167 | 2163.052867 | -0.426411963 | 0.032890078 | 0.07237377  | NUDT21     |
| ENSG00000223478 | 20.97314513 | 47.36569346 | -1.172705766 | 0.032894768 | 0.072377961 | AL441992.1 |
| ENSG00000056487 | 5.127469429 | 0.387220594 | 3.7309312    | 0.032924547 | 0.072437349 | PHF21B     |
| ENSG00000230207 | 5.140077187 | 16.62018916 | -1.6909027   | 0.03294418  | 0.072474406 | RPL4P5     |
| ENSG00000128422 | 22.86325512 | 6.268917821 | 1.855404856  | 0.03295103  | 0.072478352 | KRT17      |
| ENSG00000226469 | 3.928036872 | 0           | 4.307861036  | 0.032951553 | 0.072478352 | ADAM1B     |
| ENSG00000271320 | 4.470427048 | 0           | 4.496131751  | 0.032959002 | 0.0724886   | AC091488.1 |
| ENSG00000135423 | 7.316190867 | 0.713078025 | 3.350950302  | 0.032976068 | 0.072519996 | GLS2       |
| ENSG00000225721 | 0.894837599 | 7.254662455 | -3.005551991 | 0.032986543 | 0.0725344   | AL592166.1 |
| ENSG00000131374 | 1566.339774 | 1139.476235 | 0.459256739  | 0.032988202 | 0.0725344   | TBC1D5     |
| ENSG00000157554 | 131.9294446 | 45.300828   | 1.544971493  | 0.032992191 | 0.072537034 | ERG        |
| ENSG00000242759 | 48.68728226 | 23.45108884 | 1.049554531  | 0.033002937 | 0.072554519 | LINC00882  |
| ENSG00000105656 | 337.2408011 | 606.5297764 | -0.84633763  | 0.033008334 | 0.072560244 | ELL        |
| ENSG00000138134 | 228.0724094 | 512.8783657 | -1.169669512 | 0.033020507 | 0.072580862 | STAMBPL1   |
| ENSG00000184937 | 0           | 6.653826665 | -5.317081985 | 0.033046758 | 0.072632419 | WT1        |
| ENSG00000147316 | 207.9394548 | 292.6941472 | -0.493040678 | 0.033053317 | 0.072640689 | MCPH1      |
| ENSG00000131650 | 29.93796109 | 13.88127516 | 1.104956567  | 0.03307148  | 0.072670112 | KREMEN2    |
| ENSG00000144559 | 108.4461162 | 176.5044328 | -0.704263988 | 0.033072299 | 0.072670112 | TAMM41     |
| ENSG00000232287 | 5.518922506 | 0           | 4.797034947  | 0.033090621 | 0.072704221 | SLC6A1-AS1 |
| ENSG00000267199 | 62.53053304 | 20.37454906 | 1.614885457  | 0.033110495 | 0.072741736 | AP001029.2 |
| ENSG00000174871 | 18.2228015  | 47.34459689 | -1.37272144  | 0.033133194 | 0.07278055  | CNIH2      |
| ENSG00000162236 | 843.6728629 | 1167.725431 | -0.46892561  | 0.033133765 | 0.07278055  | STX5       |
| ENSG00000278133 | 207.7589004 | 132.4882029 | 0.649077311  | 0.033161938 | 0.072836276 | AC135050.6 |
| ENSG00000204946 | 524.6469301 | 344.9940864 | 0.605592958  | 0.033184396 | 0.072879441 | ZNF783     |
| ENSG00000177994 | 9.648327511 | 0.713078025 | 3.752480778  | 0.033235151 | 0.072980781 | C2orf73    |



|                 |             |             |              |             |             |             |
|-----------------|-------------|-------------|--------------|-------------|-------------|-------------|
| ENSG00000232759 | 4.985094408 | 198.4686663 | -5.313216272 | 0.033236157 | 0.072980781 | AC002480.1  |
| ENSG00000197467 | 178.3821882 | 881.0857561 | -2.304443227 | 0.033258674 | 0.073024053 | COL13A1     |
| ENSG00000222009 | 316.565998  | 522.1588859 | -0.721783652 | 0.033261778 | 0.073024696 | BTBD19      |
| novel.955       | 63.37463926 | 0           | 8.319395628  | 0.033271551 | 0.073039979 | -           |
| ENSG00000162643 | 29.15637951 | 95.03649861 | -1.706372175 | 0.033305546 | 0.073108431 | WDR63       |
| ENSG00000159459 | 559.5462223 | 797.3134924 | -0.51071779  | 0.03331209  | 0.073116618 | UBR1        |
| ENSG00000167863 | 1395.809096 | 2115.672593 | -0.600060327 | 0.033320302 | 0.073128464 | ATP5PD      |
| ENSG00000188542 | 97.54430671 | 58.19306648 | 0.745465494  | 0.033361184 | 0.073212005 | DUSP28      |
| novel.530       | 35.86037496 | 102.7990877 | -1.516681853 | 0.033373299 | 0.073232405 | -           |
| ENSG00000279434 | 21.96974244 | 8.489584156 | 1.365276408  | 0.033405104 | 0.073296007 | AL049776.1  |
| ENSG00000184436 | 603.1570075 | 408.0240669 | 0.563427463  | 0.033414972 | 0.073311466 | THAP7       |
| ENSG00000086991 | 21.06265309 | 50.32567148 | -1.258265695 | 0.033427418 | 0.07333258  | NOX4        |
| ENSG00000172965 | 440.2699677 | 613.4063019 | -0.478288638 | 0.033430667 | 0.073333517 | MIR4435-2HG |
| ENSG00000113387 | 1817.050249 | 2695.23572  | -0.568850231 | 0.033438381 | 0.073344245 | SUB1        |
| ENSG00000212807 | 5.1703073   | 0.356539013 | 3.741337529  | 0.033445498 | 0.073353663 | OR2A42      |
| ENSG00000012504 | 4.913564808 | 0           | 4.629014086  | 0.033478821 | 0.073420549 | NR1H4       |
| ENSG00000099810 | 701.6629237 | 945.927619  | -0.430903015 | 0.033483887 | 0.073425461 | MTAP        |
| ENSG00000214029 | 147.0310498 | 84.58846499 | 0.799234354  | 0.03350214  | 0.073459287 | ZNF891      |
| ENSG00000117525 | 1175.589194 | 3332.109592 | -1.503032207 | 0.033577472 | 0.073616901 | F3          |
| ENSG00000023318 | 1140.984344 | 1586.769295 | -0.4759916   | 0.033579689 | 0.073616901 | ERP44       |
| ENSG00000137076 | 10637.18957 | 16603.37292 | -0.642337744 | 0.033595875 | 0.073646171 | TLN1        |
| ENSG00000111245 | 0.879722543 | 9.690099862 | -3.437153442 | 0.033666828 | 0.073795482 | MYL2        |
| ENSG00000105202 | 86.61136909 | 203.2892359 | -1.230502872 | 0.03368105  | 0.073820429 | FBL         |
| ENSG00000153147 | 1579.66525  | 2122.548755 | -0.426232115 | 0.033686436 | 0.073821671 | SMARCA5     |
| ENSG00000163104 | 590.0293371 | 775.637791  | -0.394622075 | 0.033688967 | 0.073821671 | SMARCAD1    |
| ENSG00000189134 | 54.6329029  | 26.48877471 | 1.03890839   | 0.033690141 | 0.073821671 | NKAPL       |
| ENSG00000229635 | 8.974845154 | 1.436768536 | 2.645585691  | 0.033701237 | 0.073839757 | AL137159.1  |
| ENSG00000110711 | 1421.539884 | 1044.607413 | 0.444657503  | 0.033728521 | 0.073893304 | AIP         |
| ENSG00000203506 | 10.34946141 | 1.773238453 | 2.535992618  | 0.033810122 | 0.074065832 | RBMS3-AS2   |
| novel.228       | 69.53893747 | 32.46110401 | 1.101020287  | 0.033845402 | 0.074136868 | -           |
| ENSG00000225790 | 1.22840902  | 9.732678199 | -2.993969821 | 0.033848695 | 0.07413783  | AC007953.1  |
| ENSG00000104537 | 9.551511122 | 0.336469917 | 4.626711437  | 0.033863564 | 0.074164145 | ANXA13      |
| ENSG00000272677 | 28.06894967 | 8.959392885 | 1.647677884  | 0.033890347 | 0.074216547 | AC124016.1  |
| ENSG00000135862 | 14195.90453 | 19379.17749 | -0.449030908 | 0.033899795 | 0.07423098  | LAMC1       |
| ENSG00000023839 | 30.20222547 | 13.03485833 | 1.204081215  | 0.033912326 | 0.074252161 | ABCC2       |
| ENSG00000105778 | 690.7203563 | 1082.489403 | -0.647868266 | 0.033918586 | 0.074259609 | AVL9        |
| ENSG00000104671 | 545.7071316 | 366.9183013 | 0.572345785  | 0.033929504 | 0.074272026 | DCTN6       |
| ENSG00000132953 | 482.7777104 | 657.2624114 | -0.445143613 | 0.033929975 | 0.074272026 | XPO4        |
| ENSG00000132613 | 859.0679988 | 429.1189416 | 1.001823767  | 0.033975199 | 0.074364755 | MTSS2       |
| ENSG00000232411 | 7.458281153 | 0.743759607 | 3.358374199  | 0.033997846 | 0.074408056 | AC009495.2  |
| ENSG00000230635 | 5.041793687 | 0           | 4.669728961  | 0.034007166 | 0.074422184 | CYP4F60P    |
| ENSG00000158859 | 218.9441076 | 401.9993043 | -0.876181252 | 0.034010913 | 0.074424116 | ADAMTS4     |
| novel.803       | 60.13302068 | 28.19106499 | 1.091105016  | 0.034038288 | 0.074477747 | -           |
| ENSG00000238245 | 11.00106192 | 0.693008929 | 3.965286246  | 0.034069919 | 0.074538596 | MYO5BP2     |
| ENSG00000168884 | 789.7778652 | 1131.434828 | -0.518386934 | 0.034071836 | 0.074538596 | TNIP2       |
| ENSG00000287265 | 17.20392325 | 1.426156051 | 3.587919539  | 0.034080304 | 0.074550845 | AL365272.1  |
| ENSG00000273454 | 3.957013336 | 0           | 4.317316363  | 0.034101307 | 0.074590508 | AC112503.2  |
| ENSG00000146858 | 100.8316699 | 167.4680084 | -0.732340484 | 0.034125778 | 0.074634157 | ZC3HAV1L    |
| ENSG00000183793 | 15.49949652 | 4.168666062 | 1.875482967  | 0.034127008 | 0.074634157 | NPIPA5      |
| ENSG00000154767 | 614.0824225 | 841.7651726 | -0.454697433 | 0.034140689 | 0.074657792 | XPC         |
| ENSG00000232320 | 206.5246494 | 398.174253  | -0.947153757 | 0.034155307 | 0.074683474 | AC009299.2  |

|                 |             |             |              |             |             |            |
|-----------------|-------------|-------------|--------------|-------------|-------------|------------|
| ENSG00000147394 | 260.5512542 | 467.8463949 | -0.844233472 | 0.034159741 | 0.074686883 | ZNF185     |
| ENSG00000276127 | 5.40559522  | 0.336469917 | 3.807775935  | 0.034219393 | 0.074809054 | AL589935.2 |
| ENSG00000162931 | 22.39748041 | 6.409401493 | 1.803212748  | 0.034221377 | 0.074809054 | TRIM17     |
| ENSG00000287774 | 0           | 6.513342993 | -5.287697498 | 0.034237192 | 0.074837328 | AC025614.1 |
| ENSG00000134256 | 17.14081319 | 3.892403433 | 2.13014873   | 0.034268427 | 0.074899301 | CD101      |
| ENSG00000164404 | 10.88300477 | 1.345879667 | 2.974286956  | 0.034273587 | 0.074902553 | GDF9       |
| novel.506       | 104.1698198 | 53.45565887 | 0.959392982  | 0.03427819  | 0.074902553 | -          |
| ENSG00000140406 | 541.2210193 | 781.9908983 | -0.531251768 | 0.034283669 | 0.074902553 | TLNRD1     |
| ENSG00000088356 | 630.1921338 | 392.8446275 | 0.681209132  | 0.03428429  | 0.074902553 | PDRG1      |
| ENSG00000257285 | 44.45952284 | 22.69556088 | 0.965152397  | 0.034284329 | 0.074902553 | AL132780.1 |
| ENSG00000233491 | 0.925067711 | 11.01847897 | -3.588189581 | 0.034317315 | 0.074968313 | AC008163.1 |
| ENSG00000214274 | 107.453964  | 65.21977684 | 0.72339355   | 0.03432053  | 0.074969035 | ANG        |
| ENSG00000038532 | 453.9832656 | 593.1553439 | -0.385899082 | 0.034416856 | 0.075173127 | CLEC16A    |
| ENSG00000280062 | 0.308355904 | 4.718751175 | -3.85512845  | 0.034435504 | 0.075203986 | AL031719.1 |
| ENSG00000184274 | 3.926783224 | 0           | 4.307445149  | 0.034442377 | 0.075203986 | LINC00315  |
| ENSG00000221882 | 3.926783224 | 0           | 4.307445149  | 0.034442377 | 0.075203986 | AC087498.2 |
| ENSG00000108406 | 639.1913403 | 952.6685845 | -0.575465315 | 0.034442563 | 0.075203986 | DHX40      |
| ENSG00000122359 | 2684.992854 | 3883.362674 | -0.532454036 | 0.034477241 | 0.075273378 | ANXA11     |
| ENSG00000113070 | 1295.305978 | 602.8918027 | 1.103704786  | 0.034485076 | 0.075284157 | HBEGF      |
| ENSG00000083642 | 711.5245704 | 535.5691493 | 0.409553406  | 0.034515192 | 0.075343572 | PDS5B      |
| ENSG00000197563 | 334.7932568 | 554.0296848 | -0.727315028 | 0.034563316 | 0.075442285 | PIGN       |
| ENSG00000226981 | 12.27990198 | 2.221822211 | 2.486830074  | 0.034571969 | 0.075454833 | ABHD17AP6  |
| ENSG00000151692 | 315.4804469 | 461.4208239 | -0.548417913 | 0.03457528  | 0.07545572  | RNF144A    |
| ENSG00000226659 | 9.24190157  | 0.356539013 | 4.579133837  | 0.034594594 | 0.075491528 | AC021028.1 |
| ENSG00000130731 | 889.6063417 | 1339.968499 | -0.590702178 | 0.034601849 | 0.07550102  | METTLL26   |
| ENSG00000145777 | 5.128723077 | 18.21969382 | -1.820946129 | 0.034604931 | 0.075501403 | TSLP       |
| ENSG00000247134 | 184.6391597 | 91.23129399 | 1.019116003  | 0.034629883 | 0.075546729 | AC090204.1 |
| novel.97        | 7.38925885  | 0           | 5.218308007  | 0.034631521 | 0.075546729 | -          |
| ENSG00000165118 | 313.6236872 | 195.9982874 | 0.67673289   | 0.034638128 | 0.075554797 | C9orf64    |
| ENSG00000107077 | 644.7984615 | 403.3284413 | 0.677627169  | 0.034642403 | 0.07555778  | KDM4C      |
| ENSG00000095906 | 1018.174571 | 1399.856222 | -0.459366211 | 0.034652472 | 0.075573397 | NUBP2      |
| ENSG00000122033 | 704.6159169 | 517.0826498 | 0.446730372  | 0.034679473 | 0.075621154 | MTIF3      |
| ENSG00000102309 | 488.8559895 | 703.8973982 | -0.525863599 | 0.034680191 | 0.075621154 | PIN4       |
| ENSG00000160188 | 11.38123216 | 1.722487775 | 2.699749213  | 0.034691946 | 0.075640437 | RSPH1      |
| ENSG00000117592 | 3546.487803 | 5057.615575 | -0.512128996 | 0.034713129 | 0.075680273 | PRDX6      |
| ENSG00000118620 | 160.6648964 | 109.9094605 | 0.54869158   | 0.034755483 | 0.075766253 | ZNF430     |
| ENSG00000105968 | 3219.672518 | 2240.748944 | 0.522813035  | 0.034765749 | 0.075782273 | H2AFV      |
| ENSG00000251493 | 313.2650244 | 1437.823053 | -2.198513094 | 0.034778105 | 0.075802848 | FOXD1      |
| ENSG00000286150 | 4.191047608 | 0           | 4.402603074  | 0.034793238 | 0.07581675  | AC097459.1 |
| ENSG00000165188 | 4.191047608 | 0           | 4.402603074  | 0.034793238 | 0.07581675  | RNF183     |
| ENSG00000264630 | 4.191047608 | 0           | 4.402603074  | 0.034793238 | 0.07581675  | PRKCA-AS1  |
| ENSG00000123342 | 290.6746135 | 593.9696886 | -1.030645494 | 0.034815457 | 0.075858804 | MMP19      |
| ENSG00000169627 | 14.59713703 | 55.39659528 | -1.922342833 | 0.034819961 | 0.075862256 | BOLA2B     |
| ENSG00000188566 | 302.8730436 | 492.8611478 | -0.70250854  | 0.034825261 | 0.075867442 | NDOR1      |
| ENSG00000143486 | 951.9921346 | 1289.211675 | -0.437380994 | 0.034841327 | 0.075896078 | EIF2D      |
| ENSG00000065809 | 1111.017178 | 567.0680201 | 0.970669337  | 0.034858306 | 0.075926698 | FAM107B    |
| ENSG00000272021 | 4.836735879 | 0.336469917 | 3.646303704  | 0.034874321 | 0.075955212 | AC008592.5 |
| ENSG00000278903 | 3.940644631 | 14.02060296 | -1.831512114 | 0.034902932 | 0.076011155 | CU633906.2 |
| ENSG00000102858 | 1211.740482 | 1715.976975 | -0.501883601 | 0.034911601 | 0.076023661 | MGRN1      |
| ENSG00000236094 | 0           | 3.597227584 | -4.427662993 | 0.034917847 | 0.07603089  | LINC00545  |
| ENSG00000285571 | 9.402867858 | 1.773238453 | 2.397399013  | 0.034922619 | 0.076034908 | AL513548.4 |

|                 |             |             |              |             |             |            |
|-----------------|-------------|-------------|--------------|-------------|-------------|------------|
| ENSG00000121454 | 15.03246816 | 39.02656317 | -1.374965246 | 0.034946071 | 0.076079594 | LHX4       |
| ENSG00000079332 | 2475.215445 | 3387.432105 | -0.452714557 | 0.034962214 | 0.076108361 | SAR1A      |
| ENSG00000137210 | 698.0826318 | 961.3712147 | -0.461702132 | 0.034968685 | 0.07611607  | TMEM14B    |
| ENSG00000205220 | 291.8503693 | 183.0435302 | 0.674214466  | 0.035002089 | 0.076182398 | PSMB10     |
| ENSG00000246331 | 4.766175193 | 0           | 4.588325398  | 0.035006011 | 0.076184552 | AC010198.1 |
| ENSG00000223764 | 35.9569341  | 417.1974851 | -3.536737716 | 0.035053793 | 0.07628215  | LINC02593  |
| ENSG00000279277 | 17.79506353 | 5.216929734 | 1.789669196  | 0.035058041 | 0.076284325 | AC012020.1 |
| novel.250       | 3.955759687 | 0           | 4.316921546  | 0.035063601 | 0.076284325 | -          |
| ENSG00000225079 | 3.955759687 | 0           | 4.316921546  | 0.035063601 | 0.076284325 | FTH1P22    |
| ENSG00000227401 | 0           | 4.534533291 | -4.755740589 | 0.035091928 | 0.076339562 | RPL37P1    |
| ENSG00000119669 | 827.8842998 | 1480.553376 | -0.83847509  | 0.035101058 | 0.076353029 | IRF2BPL    |
| ENSG00000168803 | 93.51834199 | 168.3309927 | -0.849377878 | 0.035116541 | 0.076380314 | ADAL       |
| novel.1070      | 5.999598808 | 0.387220594 | 3.958033845  | 0.035155233 | 0.076458071 | -          |
| ENSG00000255220 | 0           | 3.577158488 | -4.420568779 | 0.035174879 | 0.076483913 | DDX18P5    |
| ENSG00000225950 | 0           | 3.577158488 | -4.420568779 | 0.035174879 | 0.076483913 | NTF4       |
| ENSG00000143995 | 96.64431197 | 174.6963563 | -0.85259755  | 0.035175947 | 0.076483913 | MEIS1      |
| ENSG00000227192 | 3.944405577 | 0           | 4.313206358  | 0.035195496 | 0.076513612 | AL023581.2 |
| ENSG00000004809 | 3.944405577 | 0           | 4.313206358  | 0.035195496 | 0.076513612 | SLC22A16   |
| ENSG00000011295 | 649.7399904 | 841.3132624 | -0.372923014 | 0.035218263 | 0.076556701 | TTC19      |
| ENSG00000177200 | 1447.718012 | 1018.94677  | 0.506609882  | 0.035224035 | 0.076562842 | CHD9       |
| novel.658       | 59.08263048 | 113.7440968 | -0.944354755 | 0.035230717 | 0.076570478 | -          |
| ENSG00000205835 | 0           | 3.943154111 | -4.560897845 | 0.035236933 | 0.076570478 | GMNC       |
| ENSG00000275088 | 6.398645048 | 0.336469917 | 4.048960546  | 0.035239063 | 0.076570478 | AC026469.1 |
| ENSG00000224331 | 3.940644631 | 0           | 4.31198225   | 0.035239337 | 0.076570478 | AC019181.1 |
| ENSG00000186051 | 5.102253911 | 0.356539013 | 3.72472141   | 0.035245302 | 0.07657552  | TAL2       |
| ENSG00000173914 | 498.9601487 | 365.6172174 | 0.448714047  | 0.035247552 | 0.07657552  | RBM4B      |
| ENSG00000176928 | 12.47772263 | 31.23448305 | -1.323288361 | 0.035255504 | 0.076586392 | GCNT4      |
| ENSG00000148680 | 76.80214657 | 179.5220968 | -1.226292144 | 0.035261124 | 0.076592196 | HTR7       |
| ENSG00000164211 | 290.5524126 | 481.6355906 | -0.72894935  | 0.035313193 | 0.076698886 | STARD4     |
| ENSG00000085465 | 48.68567261 | 22.3672633  | 1.1238095    | 0.035316519 | 0.076699697 | OVGP1      |
| ENSG00000260545 | 5.391733813 | 0.336469917 | 3.80447969   | 0.035364841 | 0.076798223 | AC026771.1 |
| ENSG00000107779 | 859.8355713 | 617.4824221 | 0.477149397  | 0.035368246 | 0.076799198 | BMPR1A     |
| ENSG00000239961 | 7.989673224 | 0           | 5.331210344  | 0.035390048 | 0.076840118 | LILRA4     |
| ENSG00000267413 | 0.308355904 | 4.596024848 | -3.82331853  | 0.035408915 | 0.076874657 | LINC01901  |
| ENSG00000179935 | 11.4430173  | 2.822786395 | 2.008579608  | 0.035455595 | 0.07696957  | LINC00652  |
| ENSG00000100813 | 3365.459008 | 4796.189829 | -0.51103654  | 0.035494831 | 0.077048307 | ACIN1      |
| ENSG00000262587 | 37.13093767 | 17.13026447 | 1.112600269  | 0.03549792  | 0.077048576 | AC133552.2 |
| novel.229       | 10.95474784 | 26.31272916 | -1.265276111 | 0.035519504 | 0.077088984 | -          |
| ENSG00000130119 | 560.5331888 | 870.4718605 | -0.635357119 | 0.035527571 | 0.077094441 | GNL3L      |
| ENSG00000256422 | 3.914175465 | 0           | 4.303296731  | 0.03553092  | 0.077094441 | LINC02552  |
| novel.631       | 3.914175465 | 0           | 4.303296731  | 0.03553092  | 0.077094441 | -          |
| ENSG00000204103 | 1314.080221 | 464.4067067 | 1.500944616  | 0.035545594 | 0.077107482 | MAFB       |
| ENSG00000235563 | 3.912921816 | 0           | 4.302886743  | 0.035545834 | 0.077107482 | AL445183.2 |
| ENSG00000183662 | 3.912921816 | 0           | 4.302886743  | 0.035545834 | 0.077107482 | TAF1       |
| ENSG00000278876 | 2.44546393  | 10.95698741 | -2.172659741 | 0.035558023 | 0.077127483 | AC145207.9 |
| ENSG00000138802 | 712.8664927 | 951.8778451 | -0.417028318 | 0.035566966 | 0.077136222 | SEC24B     |
| ENSG00000136011 | 16.04070432 | 5.330327845 | 1.583612104  | 0.03556799  | 0.077136222 | STAB2      |
| ENSG00000230806 | 6.958728849 | 0.713078025 | 3.279856509  | 0.035576582 | 0.077148416 | SRGAP2-AS1 |
| ENSG00000163959 | 73.83174479 | 37.15760274 | 0.990492653  | 0.035696154 | 0.077401251 | SLC51A     |
| ENSG00000283959 | 8.510608828 | 27.40827589 | -1.686201915 | 0.035733082 | 0.077474856 | AP002851.1 |
| ENSG00000121753 | 244.5996028 | 527.5351404 | -1.108387846 | 0.035827244 | 0.077672533 | ADGRB2     |

|                 |             |             |              |             |             |            |
|-----------------|-------------|-------------|--------------|-------------|-------------|------------|
| ENSG00000187867 | 34.93490781 | 10.28173583 | 1.75998141   | 0.035835563 | 0.077684085 | PALM3      |
| ENSG00000166840 | 6.04118303  | 18.81963052 | -1.636725713 | 0.035841787 | 0.077691094 | GLYATL1    |
| ENSG00000117523 | 2262.343481 | 3145.277898 | -0.475318432 | 0.035864387 | 0.077733598 | PRRC2C     |
| ENSG00000183853 | 2965.795956 | 4529.117995 | -0.610737694 | 0.03586752  | 0.077733903 | KIRREL1    |
| ENSG00000159079 | 279.4852623 | 199.3222064 | 0.486741884  | 0.035879528 | 0.077753442 | CFAP298    |
| ENSG00000103449 | 143.0583798 | 288.1431283 | -1.009267532 | 0.035904543 | 0.077801163 | SALL1      |
| ENSG00000117632 | 3636.720501 | 5819.768378 | -0.678360455 | 0.035920838 | 0.07782998  | STMN1      |
| ENSG00000152467 | 18.52760993 | 5.4318292   | 1.774138311  | 0.035933001 | 0.077849842 | ZSCAN1     |
| ENSG00000164048 | 276.831735  | 173.8374004 | 0.672955588  | 0.035940985 | 0.077860647 | ZNF589     |
| ENSG00000166823 | 26.54640216 | 7.695073872 | 1.77647928   | 0.035950617 | 0.077875019 | MESP1      |
| ENSG00000105676 | 420.6597721 | 697.1375192 | -0.729142435 | 0.036026694 | 0.078033309 | ARMC6      |
| ENSG00000230311 | 19.37341268 | 36.62745832 | -0.918541071 | 0.036033304 | 0.078041119 | TOMM20P4   |
| ENSG00000248927 | 2.34592678  | 20.19991618 | -3.097641463 | 0.036043301 | 0.078056265 | AC114284.1 |
| ENSG00000175449 | 29.47712971 | 13.3192933  | 1.149029044  | 0.03607078  | 0.078109264 | RFESD      |
| ENSG00000141198 | 59.01117215 | 121.0019698 | -1.037464282 | 0.036107229 | 0.078181675 | TOM1L1     |
| ENSG00000258303 | 1.495180701 | 9.643073599 | -2.688863777 | 0.036119367 | 0.078190447 | AC012464.2 |
| ENSG00000229029 | 6.859191699 | 0.693008929 | 3.27779378   | 0.036121704 | 0.078190447 | CDCA4P1    |
| ENSG00000255639 | 4.53339457  | 0           | 4.514523932  | 0.036123058 | 0.078190447 | AC005833.1 |
| ENSG00000135482 | 209.424179  | 131.6849595 | 0.671325416  | 0.036123318 | 0.078190447 | ZC3H10     |
| ENSG00000124702 | 1323.677391 | 1930.966491 | -0.544857456 | 0.03615339  | 0.078247771 | KLHDC3     |
| ENSG00000106524 | 435.0632615 | 283.788763  | 0.616233033  | 0.036155825 | 0.078247771 | ANKMY2     |
| ENSG00000198087 | 532.1701288 | 777.9595607 | -0.547622007 | 0.036159393 | 0.078248975 | CD2AP      |
| ENSG00000102189 | 807.4986631 | 532.744436  | 0.599513997  | 0.03618507  | 0.078297447 | EEA1       |
| ENSG00000244242 | 26.18718794 | 8.337332124 | 1.639337382  | 0.03618782  | 0.078297447 | IFITM10    |
| ENSG00000231473 | 4.849343637 | 0.387220594 | 3.649511349  | 0.036214135 | 0.07834786  | RB1-DT     |
| ENSG00000272054 | 28.39109571 | 9.934653428 | 1.510430779  | 0.036219974 | 0.078353967 | AC007390.2 |
| ENSG00000253395 | 4.524619029 | 0           | 4.511965698  | 0.036223354 | 0.078354754 | AP003469.2 |
| ENSG00000197694 | 8631.765285 | 6043.572824 | 0.514195815  | 0.036279902 | 0.078470541 | SPTAN1     |
| ENSG00000114857 | 3342.010136 | 1896.782252 | 0.817204364  | 0.036296897 | 0.078500764 | NKTR       |
| ENSG00000116752 | 464.0353963 | 705.7230696 | -0.605235477 | 0.036304512 | 0.078508216 | BCAS2      |
| ENSG00000148824 | 98.68933382 | 172.2841173 | -0.803225072 | 0.036306386 | 0.078508216 | MTG1       |
| ENSG00000169564 | 206.3287239 | 292.5339796 | -0.504401689 | 0.03631588  | 0.078521394 | PCBP1      |
| ENSG00000259175 | 7.634647232 | 1.060160428 | 2.834352017  | 0.036318581 | 0.078521394 | AC108451.1 |
| ENSG00000099992 | 423.9246413 | 280.6313861 | 0.595894795  | 0.03632205  | 0.078521394 | TBC1D10A   |
| ENSG00000237877 | 18.10467309 | 6.899279318 | 1.399939608  | 0.036324569 | 0.078521394 | LINC01473  |
| ENSG00000260953 | 4.853104584 | 0.356539013 | 3.650463823  | 0.036383634 | 0.07863633  | AC009093.4 |
| ENSG00000263675 | 11.24798869 | 2.833398881 | 1.979075214  | 0.036383793 | 0.07863633  | MIR5581    |
| ENSG00000250942 | 5.976961859 | 0.336469917 | 3.953071064  | 0.036405481 | 0.07867666  | ENPP7P11   |
| ENSG00000078070 | 477.7884556 | 344.7319979 | 0.470285948  | 0.036410405 | 0.078680756 | MCCC1      |
| ENSG00000168061 | 252.5367649 | 388.0313914 | -0.62041585  | 0.036423511 | 0.078702269 | SAC3D1     |
| ENSG00000131966 | 980.1474557 | 1340.716346 | -0.452167457 | 0.036426419 | 0.078702269 | ACTR10     |
| ENSG00000143294 | 892.4976634 | 1183.723093 | -0.407385475 | 0.036444471 | 0.078734724 | PRCC       |
| ENSG00000259664 | 4.496896214 | 0           | 4.503826071  | 0.036543312 | 0.078941697 | LINC02254  |
| ENSG00000151882 | 135.1049636 | 58.4704378  | 1.210073533  | 0.036581512 | 0.079017647 | CCL28      |
| ENSG00000009413 | 305.9201599 | 469.6535851 | -0.619136297 | 0.036598838 | 0.0790485   | REV3L      |
| ENSG00000196357 | 94.04873766 | 53.87916485 | 0.8062533    | 0.036613542 | 0.079073686 | ZNF565     |
| ENSG00000276048 | 4.914818457 | 0           | 4.629423816  | 0.036625835 | 0.079087086 | RF02250    |
| ENSG00000230285 | 4.914818457 | 0           | 4.629423816  | 0.036625835 | 0.079087086 | AC092807.1 |
| ENSG00000250091 | 6.055044437 | 0.723690511 | 3.073158942  | 0.036636054 | 0.079102578 | DNAH10OS   |
| ENSG00000163660 | 2564.655624 | 1505.612471 | 0.768511852  | 0.036675117 | 0.07918034  | CCNL1      |
| ENSG00000164167 | 212.6311223 | 325.0201617 | -0.612249627 | 0.036749933 | 0.079335274 | LSM6       |

|                 |             |             |              |             |             |             |
|-----------------|-------------|-------------|--------------|-------------|-------------|-------------|
| ENSG00000284693 | 57.95633718 | 30.81902102 | 0.911236334  | 0.036818255 | 0.0794741   | LINC02606   |
| ENSG00000224743 | 1.833766717 | 9.007831812 | -2.301844129 | 0.036820359 | 0.0794741   | TEX26-AS1   |
| ENSG00000124789 | 725.2914782 | 1087.137035 | -0.583869295 | 0.036824737 | 0.079476948 | NUP153      |
| ENSG00000181227 | 21.31270006 | 7.102410423 | 1.581476161  | 0.036841983 | 0.079507565 | DLSTP1      |
| ENSG00000183048 | 67.26901325 | 122.2128884 | -0.863192002 | 0.036853208 | 0.079525183 | SLC25A10    |
| ENSG00000136104 | 614.4468647 | 380.6311079 | 0.690061297  | 0.036881282 | 0.079579154 | RNASEH2B    |
| ENSG00000011243 | 687.0326929 | 919.8043603 | -0.420706647 | 0.03688648  | 0.07958376  | AKAP8L      |
| ENSG00000111328 | 2715.052447 | 3639.10228  | -0.422622438 | 0.036918524 | 0.079646281 | CDK2AP1     |
| ENSG00000277639 | 121.6047993 | 40.26366822 | 1.594427865  | 0.036926623 | 0.079657139 | AC007906.2  |
| ENSG00000251148 | 0           | 6.33729745  | -5.242506111 | 0.036942323 | 0.079684392 | AL158068.2  |
| ENSG00000186001 | 1983.51822  | 1113.238563 | 0.833398336  | 0.036960557 | 0.07970604  | LRCH3       |
| ENSG00000086717 | 8.469024606 | 1.069617038 | 2.979109053  | 0.03696129  | 0.07970604  | PPEF1       |
| ENSG00000012660 | 3274.866087 | 2430.959994 | 0.429825205  | 0.036961563 | 0.07970604  | ELOVL5      |
| ENSG00000115226 | 369.9012687 | 229.38013   | 0.690048963  | 0.036989586 | 0.07975985  | FNDC4       |
| novel.32        | 12.58345675 | 1.874739808 | 2.769313583  | 0.037006491 | 0.079789679 | -           |
| ENSG00000206754 | 2.431602522 | 9.661858425 | -1.993838754 | 0.037074531 | 0.079929748 | SNORD101    |
| ENSG00000285693 | 49.60747792 | 24.75439017 | 1.001902348  | 0.03708698  | 0.079949952 | AP002381.2  |
| ENSG00000204740 | 15.61045905 | 2.751966622 | 2.482510294  | 0.037090236 | 0.079950339 | MALRD1      |
| ENSG00000236154 | 4.548509626 | 0           | 4.518941002  | 0.037116097 | 0.079999446 | AL450311.1  |
| ENSG00000239415 | 7.220485935 | 23.80621519 | -1.715979818 | 0.037124888 | 0.080006221 | AP001469.3  |
| ENSG00000229659 | 7.783005762 | 1.10029862  | 2.841447427  | 0.037125399 | 0.080006221 | RPL26P6     |
| ENSG00000254783 | 14.74298826 | 4.596024848 | 1.673530019  | 0.037149234 | 0.080049642 | AP003084.1  |
| ENSG00000184205 | 1469.602094 | 1016.586006 | 0.532036683  | 0.03715171  | 0.080049642 | TSPYL2      |
| ENSG00000256029 | 25.62724668 | 9.435190599 | 1.446711455  | 0.037161675 | 0.080064472 | AL590560.1  |
| ENSG00000090861 | 2301.974702 | 3314.320334 | -0.525930584 | 0.037193751 | 0.080126935 | AARS        |
| ENSG00000108774 | 1241.812467 | 1732.562327 | -0.480453701 | 0.037206195 | 0.080147098 | RAB5C       |
| ENSG00000278996 | 4.581318307 | 0           | 4.528518273  | 0.03723042  | 0.080187425 | FP671120.2  |
| ENSG00000258416 | 4.538480436 | 0           | 4.516019831  | 0.037234175 | 0.080187425 | AF123462.1  |
| ENSG00000251611 | 4.538480436 | 0           | 4.516019831  | 0.037234175 | 0.080187425 | FAM160A1-DT |
| ENSG00000080493 | 33.95335463 | 97.58019704 | -1.524969047 | 0.03726098  | 0.080238502 | SLC4A4      |
| ENSG00000163788 | 612.4855805 | 388.4341388 | 0.656402102  | 0.037267329 | 0.080245522 | SNRK        |
| ENSG00000136381 | 841.4263467 | 1113.08846  | -0.403738055 | 0.037296302 | 0.080301254 | IREB2       |
| novel.264       | 5.194269168 | 0           | 4.709838697  | 0.037305286 | 0.080303923 | -           |
| novel.110       | 5.1916906   | 0.356539013 | 3.746626677  | 0.037306815 | 0.080303923 | -           |
| ENSG00000279839 | 5.1916906   | 0.356539013 | 3.746626677  | 0.037306815 | 0.080303923 | AL512383.1  |
| ENSG00000107537 | 383.2630161 | 560.5890956 | -0.548458334 | 0.037400806 | 0.080499573 | PHYH        |
| ENSG00000007402 | 44.04593101 | 15.53880376 | 1.503819518  | 0.037418157 | 0.080530247 | CACNA2D2    |
| ENSG00000287156 | 7.078395649 | 0           | 5.15629409   | 0.037424443 | 0.080537105 | AL138479.2  |
| ENSG00000135775 | 260.4475727 | 372.1791277 | -0.514959425 | 0.037438062 | 0.080559739 | COG2        |
| ENSG00000271871 | 7.617024878 | 1.10029862  | 2.807324624  | 0.037455052 | 0.080584873 | AC005740.4  |
| ENSG00000232190 | 7.393019796 | 0           | 5.21904806   | 0.037455946 | 0.080584873 | LINC02181   |
| ENSG00000287299 | 38.71562633 | 16.0180691  | 1.276902983  | 0.037538177 | 0.080751581 | AC012459.1  |
| ENSG00000138172 | 487.0325635 | 280.6976635 | 0.795240061  | 0.037539648 | 0.080751581 | CALHM2      |
| ENSG00000162891 | 0           | 6.398660613 | -5.255813495 | 0.037547511 | 0.080759401 | IL20        |
| ENSG00000266473 | 9.657103052 | 2.496928964 | 1.947682276  | 0.0375495   | 0.080759401 | AC007448.3  |
| ENSG00000138031 | 1264.936936 | 865.0051332 | 0.54819708   | 0.037584776 | 0.080828579 | ADCY3       |
| ENSG00000099995 | 1496.473835 | 1939.07573  | -0.37374126  | 0.037600283 | 0.080855235 | SF3A1       |
| ENSG00000156875 | 23.84126116 | 54.12757123 | -1.184933173 | 0.037620436 | 0.080891878 | MFS14A      |
| ENSG00000203588 | 9.279440112 | 1.793307549 | 2.372804744  | 0.037645183 | 0.08093839  | IGBP1-AS1   |
| ENSG00000253730 | 7.250716047 | 0.774441189 | 3.291566601  | 0.0376676   | 0.080979887 | AC015909.2  |
| ENSG00000173715 | 161.2543561 | 88.51673426 | 0.863176938  | 0.037706225 | 0.081056216 | C11orf80    |

|                 |             |             |              |             |             |            |
|-----------------|-------------|-------------|--------------|-------------|-------------|------------|
| ENSG00000163002 | 138.2723597 | 238.8664693 | -0.789820995 | 0.0377345   | 0.081110288 | NUP35      |
| ENSG00000076067 | 2237.741532 | 1389.248697 | 0.687808151  | 0.037770697 | 0.081181377 | RBMS2      |
| novel.965       | 20.60934359 | 79.12569775 | -1.939084761 | 0.037776295 | 0.081186692 | -          |
| ENSG00000099957 | 97.91326503 | 47.82257796 | 1.037821944  | 0.037789901 | 0.081209215 | P2RX6      |
| ENSG00000154099 | 13.95012384 | 3.280826763 | 2.096135621  | 0.037810719 | 0.0812463   | DNAAF1     |
| ENSG00000110944 | 15.81544559 | 35.41735761 | -1.165231741 | 0.037813412 | 0.0812463   | IL23A      |
| ENSG00000173868 | 33.16980739 | 12.75962318 | 1.384536628  | 0.037818928 | 0.081251433 | PHOSPHO1   |
| ENSG00000231584 | 72.24741214 | 28.45928367 | 1.338497993  | 0.037835858 | 0.081277658 | FAHD2CP    |
| ENSG00000118520 | 4.488049402 | 0           | 4.501190667  | 0.037837392 | 0.081277658 | ARG1       |
| novel.37        | 15.09418203 | 4.381125383 | 1.794481495  | 0.0378557   | 0.081310264 | -          |
| ENSG00000163576 | 13.0226201  | 3.913628404 | 1.728712199  | 0.037892554 | 0.081382694 | EFHB       |
| ENSG00000170092 | 9.823083936 | 30.19336423 | -1.615038666 | 0.037903284 | 0.08139901  | SPDYE5     |
| ENSG00000145293 | 1209.272022 | 901.5277641 | 0.423484082  | 0.037933138 | 0.08145639  | ENOPH1     |
| ENSG00000120253 | 635.4756418 | 865.967354  | -0.446737158 | 0.037949763 | 0.081485354 | NUP43      |
| ENSG00000198417 | 111.1419122 | 51.73736224 | 1.106474351  | 0.037983492 | 0.081551038 | MT1F       |
| ENSG00000254910 | 71.36551047 | 24.08962268 | 1.570183466  | 0.038024461 | 0.081632252 | AC136475.2 |
| ENSG00000254656 | 4.848089989 | 16.93427823 | -1.804277658 | 0.038032091 | 0.081641887 | RTL1       |
| ENSG00000235454 | 0.615458159 | 6.612404203 | -3.434567125 | 0.038056558 | 0.08168766  | HAUS6P3    |
| ENSG00000260581 | 7.074634703 | 0           | 5.155562297  | 0.038091543 | 0.081755999 | AC011374.1 |
| ENSG00000104879 | 3.954506038 | 0           | 4.316545699  | 0.03809785  | 0.081759095 | CKM        |
| ENSG00000115380 | 834.9786879 | 6357.420137 | -2.928657469 | 0.038099279 | 0.081759095 | EFEMP1     |
| ENSG00000197016 | 299.8611849 | 185.8661882 | 0.691565412  | 0.038133215 | 0.081825163 | ZNF470     |
| ENSG00000185591 | 1681.664258 | 1284.071237 | 0.38929157   | 0.038143771 | 0.081841053 | SP1        |
| ENSG00000198040 | 746.8867339 | 537.2627065 | 0.475545796  | 0.038148528 | 0.081844502 | ZNF84      |
| ENSG00000260618 | 17.46525306 | 5.074134312 | 1.788688612  | 0.038156313 | 0.081854444 | AC025917.1 |
| ENSG00000182704 | 492.2255616 | 1438.050658 | -1.54683415  | 0.038161016 | 0.081857774 | TSKU       |
| ENSG00000066405 | 7.000313071 | 20.02387064 | -1.519481755 | 0.03817139  | 0.081870114 | CLDN18     |
| ENSG00000187605 | 376.9648923 | 231.8192447 | 0.702416742  | 0.038173071 | 0.081870114 | TET3       |
| ENSG00000273972 | 5.085885207 | 0.336469917 | 3.720597236  | 0.038211341 | 0.081945426 | AC068722.2 |
| ENSG00000224769 | 12.55175952 | 0.672939833 | 4.182027969  | 0.038228352 | 0.081975142 | MUC20P1    |
| ENSG00000260526 | 20.27075758 | 8.112976048 | 1.311368333  | 0.038238959 | 0.081986873 | AC109347.1 |
| ENSG00000258077 | 0           | 3.546476906 | -4.409787109 | 0.03824329  | 0.081986873 | AC078923.1 |
| ENSG00000199436 | 0           | 3.546476906 | -4.409787109 | 0.03824329  | 0.081986873 | SNORD9     |
| ENSG00000146834 | 1001.112722 | 1409.372481 | -0.493515142 | 0.038250119 | 0.081994748 | MEPCE      |
| ENSG00000287255 | 39.66214827 | 6.15680398  | 2.677379725  | 0.038258844 | 0.082006684 | AC007877.1 |
| novel.668       | 7.562832897 | 25.71150819 | -1.760355944 | 0.03827124  | 0.082026488 | -          |
| ENSG00000163026 | 165.3782758 | 256.7757513 | -0.635871952 | 0.038306167 | 0.082094574 | WDPCP      |
| ENSG00000147526 | 2812.149195 | 1883.041662 | 0.578515142  | 0.038325329 | 0.082128867 | TACC1      |
| ENSG00000120868 | 447.4138381 | 694.925744  | -0.635167099 | 0.038331136 | 0.082134536 | APAF1      |
| ENSG00000232679 | 0.308355904 | 4.340987191 | -3.735526679 | 0.038351611 | 0.082171632 | LINC01705  |
| ENSG00000272812 | 38.79446436 | 15.13511009 | 1.352674784  | 0.038384855 | 0.082236079 | AC004908.2 |
| ENSG00000147121 | 319.5970741 | 217.1795007 | 0.557156695  | 0.038402622 | 0.082267358 | KRBOX4     |
| ENSG00000263338 | 4.178439849 | 0           | 4.398578073  | 0.03842105  | 0.082300049 | AC027796.5 |
| ENSG00000104957 | 843.9014866 | 565.1791787 | 0.578728299  | 0.038434155 | 0.082321334 | CCDC130    |
| ENSG00000198840 | 31176.34452 | 21221.70511 | 0.554911534  | 0.038450219 | 0.082348953 | MT-ND3     |
| ENSG00000101115 | 9.799406802 | 29.63369412 | -1.598887328 | 0.038458012 | 0.082358854 | SALL4      |
| ENSG00000083168 | 970.530031  | 654.9013767 | 0.56755451   | 0.038466294 | 0.082366079 | KAT6A      |
| novel.464       | 157.2376662 | 403.7189186 | -1.360568578 | 0.038467726 | 0.082366079 | -          |
| ENSG00000248159 | 6.080259955 | 0.743759607 | 3.063808266  | 0.038478847 | 0.082383101 | HSPA8P11   |
| ENSG00000229117 | 9662.219999 | 15007.8674  | -0.635306846 | 0.038491756 | 0.082403947 | RPL41      |
| ENSG00000235674 | 4.605208904 | 0           | 4.535473664  | 0.038529681 | 0.082478342 | LDHAP2     |

|                 |             |             |              |             |             |            |
|-----------------|-------------|-------------|--------------|-------------|-------------|------------|
| ENSG0000067082  | 6515.271898 | 3322.318495 | 0.97164088   | 0.038544469 | 0.0825032   | KLF6       |
| ENSG00000198483 | 216.2464016 | 66.27617849 | 1.7039607    | 0.038559259 | 0.082528058 | ANKRD35    |
| ENSG00000153207 | 866.6956336 | 1177.538034 | -0.442002485 | 0.038582085 | 0.082563604 | AHCTF1     |
| ENSG0000005243  | 993.212426  | 509.4900017 | 0.962593008  | 0.038582222 | 0.082563604 | COPZ2      |
| ENSG00000257038 | 52.2162729  | 22.37098772 | 1.215492772  | 0.038657522 | 0.082717927 | AP002761.3 |
| ENSG00000164815 | 231.7740482 | 386.6308267 | -0.739082081 | 0.03870476  | 0.082812186 | ORC5       |
| ENSG00000213261 | 93.89865477 | 169.5427632 | -0.852989501 | 0.038727064 | 0.082853084 | EEF1B2P6   |
| ENSG00000126005 | 521.8379052 | 953.1897265 | -0.868891643 | 0.03873257  | 0.08285804  | MMP24OS    |
| ENSG00000171988 | 1396.58669  | 943.3491374 | 0.566236743  | 0.038740587 | 0.082861079 | JMJD1C     |
| ENSG00000119965 | 204.4655537 | 289.8639591 | -0.502883733 | 0.038740957 | 0.082861079 | C10orf88   |
| ENSG00000260071 | 4.45656564  | 0           | 4.491860751  | 0.038743559 | 0.082861079 | AC012178.1 |
| ENSG00000275443 | 9.915027922 | 1.456837632 | 2.776824359  | 0.038792534 | 0.082958995 | AC012409.2 |
| novel.733       | 55.88058737 | 164.5166695 | -1.556610519 | 0.038799146 | 0.082966305 | -          |
| ENSG00000274824 | 3.899060409 | 0           | 4.298256945  | 0.03882737  | 0.083019825 | MIR7152    |
| ENSG00000105058 | 1269.677684 | 1762.357917 | -0.473202803 | 0.038838412 | 0.083036603 | FAM32A     |
| ENSG00000167996 | 21792.90172 | 45365.96524 | -1.057749233 | 0.038848224 | 0.083050745 | FTH1       |
| ENSG00000158555 | 538.9033681 | 256.8257188 | 1.06963409   | 0.038871823 | 0.083094359 | GDPD5      |
| ENSG00000259946 | 6.910876383 | 0           | 5.122998985  | 0.038886629 | 0.083119169 | BX005019.1 |
| ENSG00000281571 | 43.3103075  | 16.51740353 | 1.396662806  | 0.03890713  | 0.083156149 | AC241585.2 |
| ENSG00000254288 | 3.972128392 | 0           | 4.322335168  | 0.038915704 | 0.083167633 | AC087672.2 |
| ENSG00000267274 | 11.158552   | 2.822786395 | 1.971925445  | 0.03893237  | 0.083196407 | AC008770.3 |
| ENSG00000184154 | 89.41336957 | 53.06599814 | 0.750797559  | 0.038937273 | 0.08320004  | LRTOMT     |
| ENSG00000177494 | 6.641526132 | 28.6628815  | -2.105073065 | 0.038949845 | 0.083220059 | ZBED2      |
| ENSG00000207340 | 0.307102255 | 4.270167417 | -3.715813129 | 0.038998101 | 0.08331631  | RNVU1-1    |
| ENSG00000226243 | 10.18054595 | 33.86372334 | -1.730951459 | 0.039049787 | 0.083419875 | RPL37AP1   |
| ENSG00000203616 | 10.46125031 | 1.161661783 | 3.219813951  | 0.03908617  | 0.083490733 | RHOT1P2    |
| ENSG00000160213 | 1731.097232 | 2605.346056 | -0.589765848 | 0.0390947   | 0.083502087 | CSTB       |
| ENSG00000049768 | 16.19052996 | 4.688069593 | 1.789234039  | 0.039102873 | 0.08351268  | FOXP3      |
| ENSG00000137145 | 639.3567948 | 469.4237408 | 0.445696623  | 0.039110749 | 0.083522635 | DENND4C    |
| ENSG00000272701 | 12.52550382 | 2.038888596 | 2.587481101  | 0.039135306 | 0.083568208 | MESTIT1    |
| ENSG00000173281 | 9.170158507 | 29.62166897 | -1.690637073 | 0.03915925  | 0.083612465 | PPP1R3B    |
| ENSG00000227176 | 8.73328899  | 1.4981317   | 2.576182413  | 0.039185071 | 0.083660723 | AC092641.1 |
| ENSG00000280135 | 5.200537412 | 0.356539013 | 3.748857784  | 0.03919485  | 0.083674725 | AL096816.1 |
| ENSG00000220472 | 36.50419668 | 66.1433064  | -0.86061636  | 0.039204967 | 0.083689446 | AL139095.2 |
| novel.233       | 51.44464958 | 28.4141368  | 0.857553622  | 0.039210543 | 0.083694473 | -          |
| ENSG00000136932 | 198.6469796 | 120.7440256 | 0.716982974  | 0.039222759 | 0.083713669 | TRMO       |
| ENSG00000232311 | 8.714341717 | 0.672939833 | 3.646750217  | 0.039275774 | 0.083819934 | AL512303.1 |
| ENSG00000228363 | 15.75086841 | 2.873537073 | 2.456446823  | 0.039282185 | 0.08382673  | AC015971.1 |
| ENSG00000155229 | 1254.7606   | 1899.279066 | -0.597900898 | 0.039312712 | 0.083884984 | MMS19      |
| ENSG00000124159 | 12.05596816 | 3.220619475 | 1.903630907  | 0.039328852 | 0.083912532 | MATN4      |
| ENSG00000254300 | 0.600343103 | 8.572300685 | -3.834715624 | 0.03933735  | 0.083923771 | LINC01111  |
| ENSG00000165124 | 473.711285  | 1852.770665 | -1.967710339 | 0.039371963 | 0.08399072  | SVEP1      |
| ENSG00000106128 | 8.625189763 | 0.356539013 | 4.479445289  | 0.039402898 | 0.08404981  | GHRHR      |
| ENSG00000105988 | 2.138361675 | 8.947624524 | -2.072059936 | 0.039439195 | 0.08412033  | NHP2P1     |
| ENSG00000116586 | 748.1494737 | 1014.803033 | -0.439805478 | 0.039463632 | 0.084165542 | LAMTOR2    |
| ENSG00000258454 | 3.93054417  | 0           | 4.308654032  | 0.039474743 | 0.084182328 | AC016526.2 |
| ENSG00000117305 | 629.4619956 | 963.8967921 | -0.61444835  | 0.039510312 | 0.084251265 | HMGCL      |
| ENSG00000057468 | 18.15983398 | 3.993904788 | 2.191077232  | 0.03953485  | 0.084296671 | MSH4       |
| ENSG00000174453 | 3.925529575 | 0           | 4.307005895  | 0.039542942 | 0.084300088 | VWC2L      |
| ENSG00000215533 | 3.925529575 | 0           | 4.307005895  | 0.039542942 | 0.084300088 | LINC00189  |
| ENSG00000197901 | 52.37537228 | 0           | 8.044374206  | 0.03956355  | 0.084337101 | SLC22A6    |

|                 |             |             |              |             |             |            |
|-----------------|-------------|-------------|--------------|-------------|-------------|------------|
| ENSG00000180884 | 52.36087048 | 161.9572218 | -1.628156804 | 0.039575734 | 0.084356152 | ZNF792     |
| ENSG00000176532 | 31.25448188 | 524.538439  | -4.068993217 | 0.039589314 | 0.084378177 | PRR15      |
| ENSG00000113593 | 873.1634149 | 628.3403827 | 0.474738465  | 0.03959541  | 0.084384247 | PPWD1      |
| ENSG00000204172 | 93.33710351 | 185.7527558 | -0.99389558  | 0.039609316 | 0.084406958 | AGAP9      |
| ENSG00000273551 | 7.083410244 | 0           | 5.157302803  | 0.039617095 | 0.084416611 | AC120498.8 |
| ENSG00000266265 | 16.29647789 | 1.365948763 | 3.553266975  | 0.039629993 | 0.08443717  | KLF14      |
| ENSG0000029534  | 143.9456513 | 37.00689176 | 1.957060258  | 0.039644911 | 0.084462029 | ANK1       |
| ENSG00000230453 | 3.663772488 | 12.3818592  | -1.757541785 | 0.039655078 | 0.08447676  | ANKRD18B   |
| ENSG00000264705 | 3.915429114 | 0           | 4.303658521  | 0.039680985 | 0.084511163 | AC090337.1 |
| ENSG00000271815 | 3.915429114 | 0           | 4.303658521  | 0.039680985 | 0.084511163 | AC008897.3 |
| ENSG00000248242 | 3.915429114 | 0           | 4.303658521  | 0.039680985 | 0.084511163 | AC004053.1 |
| ENSG00000270640 | 5.954253639 | 0.387220594 | 3.947979975  | 0.039689521 | 0.084515487 | AC104695.4 |
| novel.187       | 5.954253639 | 0.387220594 | 3.947979975  | 0.039689521 | 0.084515487 | -          |
| ENSG00000275585 | 7.128470678 | 0           | 5.168279014  | 0.039702588 | 0.084536382 | AC241377.2 |
| ENSG00000232545 | 1.802282956 | 11.33945611 | -2.646942694 | 0.03971515  | 0.084548179 | AC253536.3 |
| ENSG00000127445 | 1476.904737 | 1997.171045 | -0.435467379 | 0.039715847 | 0.084548179 | PIN1       |
| ENSG00000163492 | 7.072127405 | 0           | 5.155085422  | 0.039717891 | 0.084548179 | CCDC141    |
| ENSG00000256824 | 5.949239044 | 0.387220594 | 3.946878342  | 0.03973057  | 0.08456548  | AP000721.2 |
| ENSG00000232986 | 3.911668168 | 0           | 4.30241929   | 0.039732528 | 0.08456548  | AL139081.1 |
| ENSG00000139842 | 1555.653001 | 2382.523399 | -0.614935445 | 0.039752451 | 0.084600953 | CUL4A      |
| ENSG00000171408 | 249.9112286 | 672.3001769 | -1.427940173 | 0.039759435 | 0.084608885 | PDE7B      |
| ENSG00000223549 | 6.022307028 | 0.723690511 | 3.066449837  | 0.039827636 | 0.084742063 | MTND5P28   |
| ENSG00000149187 | 1660.247024 | 2298.074447 | -0.468934207 | 0.039828542 | 0.084742063 | CELF1      |
| ENSG00000206828 | 6.615056966 | 0.693008929 | 3.224166491  | 0.039832512 | 0.084743571 | RF00003    |
| ENSG00000261039 | 1.49643435  | 8.499040767 | -2.501262192 | 0.039857425 | 0.084789631 | LINC02544  |
| ENSG00000285095 | 6.09662866  | 0.743759607 | 3.06671003   | 0.039885033 | 0.084841414 | AC025887.2 |
| ENSG00000144671 | 2.080408748 | 11.41258764 | -2.441890038 | 0.039914248 | 0.08489661  | SLC22A14   |
| ENSG00000203867 | 51.2247611  | 11.07496185 | 2.213518337  | 0.039935024 | 0.084933845 | RBM20      |
| ENSG00000198920 | 331.6733142 | 441.6890127 | -0.413013996 | 0.039995496 | 0.085055494 | KIAA0753   |
| ENSG00000223839 | 5.364010998 | 0.387220594 | 3.797731933  | 0.040033457 | 0.085129255 | FAM95B1    |
| ENSG00000147894 | 356.0342573 | 220.2444348 | 0.69433902   | 0.040042157 | 0.085140787 | C9orf72    |
| ENSG00000166912 | 246.6001062 | 139.6819345 | 0.818821565  | 0.040060202 | 0.085172185 | MTMR10     |
| ENSG00000258315 | 21.8125371  | 9.222731278 | 1.234924971  | 0.040097023 | 0.085243495 | C17orf49   |
| novel.993       | 8.866532464 | 0.336469917 | 4.521697915  | 0.040104391 | 0.085252183 | -          |
| ENSG00000229833 | 73.3061506  | 40.21163328 | 0.86949593   | 0.040126554 | 0.085292318 | PET100     |
| ENSG00000070610 | 1542.852717 | 1026.064746 | 0.588287242  | 0.040198326 | 0.085437885 | GBA2       |
| ENSG00000283341 | 60.559505   | 31.11188511 | 0.959703011  | 0.040233414 | 0.085505467 | AC068205.2 |
| ENSG00000215270 | 16.0081091  | 1.733100261 | 3.191385085  | 0.040257712 | 0.085550107 | AP000523.1 |
| ENSG00000038274 | 763.2257323 | 1200.11039  | -0.652992282 | 0.040266725 | 0.085562263 | MAT2B      |
| ENSG00000187098 | 232.0714335 | 80.40773942 | 1.527306038  | 0.040274313 | 0.085571388 | MITF       |
| ENSG00000283189 | 18.16520458 | 5.73646166  | 1.66199189   | 0.040282745 | 0.085582303 | AC104452.1 |
| ENSG00000274383 | 4.854358232 | 0.336469917 | 3.650810237  | 0.040296921 | 0.085605422 | AC103691.1 |
| ENSG00000270001 | 12.16302721 | 2.751966622 | 2.117185164  | 0.040327677 | 0.085663753 | AL121894.2 |
| ENSG00000233325 | 37.96001572 | 18.56690461 | 1.038716465  | 0.040334682 | 0.08567163  | MIPEPP3    |
| ENSG00000243646 | 40.21023757 | 11.34536388 | 1.823482949  | 0.040340168 | 0.085676277 | IL10RB     |
| ENSG00000225077 | 0.293240848 | 4.402350354 | -3.752502317 | 0.040357373 | 0.085705813 | LINC00337  |
| ENSG00000160588 | 48.69000302 | 10.29478846 | 2.233611525  | 0.040364108 | 0.085710064 | MPZL3      |
| ENSG00000185052 | 85.31658691 | 17.43720868 | 2.289521092  | 0.040365973 | 0.085710064 | SLC24A3    |
| ENSG00000132846 | 220.1824311 | 93.1970167  | 1.238399439  | 0.040388391 | 0.085750657 | ZBED3      |
| ENSG00000122367 | 26.30964677 | 8.500196642 | 1.623973532  | 0.040402147 | 0.085772853 | LDB3       |
| ENSG00000132294 | 955.9236863 | 1427.666355 | -0.578685025 | 0.040426087 | 0.085816664 | EFR3A      |



|                 |             |             |              |             |             |             |
|-----------------|-------------|-------------|--------------|-------------|-------------|-------------|
| ENSG00000284951 | 3.973382041 | 0           | 4.322773292  | 0.04046184  | 0.085885545 | AL355798.1  |
| ENSG00000110074 | 437.1486726 | 686.9959162 | -0.652233358 | 0.040478737 | 0.085914391 | FOXRED1     |
| ENSG00000205871 | 12.10632793 | 26.49681865 | -1.12649902  | 0.040514022 | 0.085975707 | RPS3AP47    |
| ENSG00000187994 | 3.969621095 | 0           | 4.321543509  | 0.040514244 | 0.085975707 | RINL        |
| ENSG00000013563 | 291.7015556 | 428.8838231 | -0.556303778 | 0.040534032 | 0.086010673 | DNASE1L1    |
| ENSG00000139291 | 450.7072843 | 267.6916202 | 0.750562793  | 0.040570419 | 0.086080853 | TMEM19      |
| ENSG00000184508 | 104.664144  | 153.6208012 | -0.554983076 | 0.040579258 | 0.086092578 | HDDC3       |
| ENSG00000238082 | 0.308355904 | 4.566499142 | -3.81489196  | 0.040613865 | 0.086158964 | AC009948.1  |
| ENSG00000173218 | 384.2111205 | 622.888544  | -0.697556577 | 0.040635365 | 0.086197535 | VANGL1      |
| ENSG00000171862 | 18.71984651 | 4.646775526 | 2.010511186  | 0.040676968 | 0.086278741 | PTEN        |
| ENSG00000165521 | 8.481632365 | 1.069617038 | 2.981186896  | 0.040753754 | 0.086434554 | AL121768.1  |
| ENSG00000268403 | 33.40301529 | 13.95325081 | 1.257976936  | 0.040799312 | 0.086524115 | AC132192.2  |
| ENSG00000236337 | 10.58593171 | 2.200597239 | 2.279885526  | 0.040810342 | 0.086534307 | FMR1-IT1    |
| ENSG00000060237 | 3449.598036 | 2589.868492 | 0.413521092  | 0.040810779 | 0.086534307 | WNK1        |
| ENSG00000261668 | 3.945659226 | 0           | 4.31364403   | 0.040850915 | 0.08661234  | AC093591.2  |
| ENSG00000116128 | 443.7587862 | 294.4649455 | 0.591968512  | 0.040858432 | 0.086621209 | BCL9        |
| ENSG00000055917 | 1922.130124 | 1442.143294 | 0.414575566  | 0.040886724 | 0.086674118 | PUM2        |
| ENSG00000130714 | 920.3498615 | 640.6669624 | 0.522816803  | 0.040893378 | 0.086681151 | POMT1       |
| ENSG00000237234 | 43.65570375 | 12.48220468 | 1.812045325  | 0.040899569 | 0.086687201 | Z99289.1    |
| ENSG00000170743 | 3.939390982 | 0           | 4.311583874  | 0.040939616 | 0.086765002 | SYT9        |
| ENSG00000188856 | 82.5807614  | 357.3150957 | -2.113109896 | 0.040963238 | 0.086807984 | RPSAP47     |
| ENSG00000182057 | 13.64058555 | 32.93129792 | -1.27630154  | 0.04103934  | 0.086962164 | OGFRP1      |
| ENSG00000149972 | 5.199283763 | 0.336469917 | 3.748602533  | 0.041066396 | 0.0870124   | CNTN5       |
| ENSG00000214954 | 30.35935955 | 11.6276155  | 1.378504651  | 0.041087721 | 0.087043734 | LRRC69      |
| ENSG00000170374 | 7.167547603 | 0.672939833 | 3.360523055  | 0.041087885 | 0.087043734 | AC073611.1  |
| ENSG00000130382 | 2075.09583  | 2940.435938 | -0.502808696 | 0.041094649 | 0.087050964 | MLLT1       |
| ENSG00000281912 | 21.5920795  | 8.254615595 | 1.389193862  | 0.041131488 | 0.087121897 | LINC01144   |
| ENSG00000108433 | 853.9078581 | 1119.900238 | -0.391081245 | 0.041136841 | 0.087126131 | GOSR2       |
| ENSG00000130943 | 18.68614019 | 5.634960305 | 1.720757212  | 0.041166958 | 0.087182812 | PKDREJ      |
| ENSG00000277215 | 3.33904788  | 12.28164211 | -1.885929438 | 0.041195475 | 0.087235306 | SPANXA2-OT1 |
| ENSG00000160131 | 728.1985408 | 960.6185117 | -0.399863802 | 0.041198461 | 0.087235306 | VMA21       |
| ENSG00000174405 | 460.949275  | 309.7672865 | 0.572853526  | 0.041245522 | 0.087327838 | LIG4        |
| ENSG00000213533 | 21.59995739 | 42.90711703 | -0.994491044 | 0.041252814 | 0.08733616  | STIMATE     |
| ENSG00000249201 | 7.395527094 | 0           | 5.219559906  | 0.041266308 | 0.087357609 | AC114291.1  |
| ENSG00000213462 | 295.2717748 | 144.8328648 | 1.028963078  | 0.041276229 | 0.087371494 | ERV3-1      |
| ENSG00000260853 | 85.90909626 | 158.91963   | -0.885584668 | 0.041285168 | 0.087383296 | AC109460.2  |
| ENSG00000148688 | 503.2429546 | 674.1455669 | -0.422031159 | 0.0413074   | 0.087423229 | RPP30       |
| ENSG00000180581 | 23.72696496 | 45.87257045 | -0.952922247 | 0.04132614  | 0.087455766 | SRP9P1      |
| ENSG00000285991 | 7.487257617 | 0.774441189 | 3.335916686  | 0.041343619 | 0.087485629 | AL355312.6  |
| ENSG00000115423 | 26.38382621 | 9.282810171 | 1.519796853  | 0.041355897 | 0.087504484 | DNAH6       |
| ENSG00000260552 | 1.830005771 | 11.33603567 | -2.640710025 | 0.041374345 | 0.087530208 | AC023043.1  |
| ENSG00000273291 | 9.255478243 | 0.774441189 | 3.633594295  | 0.041374793 | 0.087530208 | AC092042.3  |
| ENSG00000155530 | 17.02114639 | 5.889869568 | 1.54431743   | 0.041410267 | 0.087598124 | LRGUK       |
| ENSG00000182979 | 1240.073    | 1940.842778 | -0.646090726 | 0.041419891 | 0.087611349 | MTA1        |
| ENSG00000114738 | 558.9075563 | 791.9766751 | -0.502742706 | 0.041443688 | 0.087654547 | MAPKAPK3    |
| ENSG00000262209 | 9.672218109 | 26.82853667 | -1.46739568  | 0.041457718 | 0.087670291 | PCDHGB3     |
| ENSG00000144681 | 34.73103273 | 92.90518008 | -1.421525586 | 0.041457881 | 0.087670291 | STAC        |
| ENSG00000161132 | 12.70416373 | 3.709341424 | 1.79734463   | 0.041473768 | 0.08769675  | AC007663.1  |
| ENSG00000275759 | 9.352508095 | 1.702418679 | 2.421217066  | 0.041484518 | 0.087712343 | AC026367.3  |
| ENSG00000174460 | 5.192944248 | 0.356539013 | 3.747036576  | 0.041493946 | 0.087725137 | ZCCHC12     |
| ENSG00000248522 | 3.900314058 | 0           | 4.298620444  | 0.041499846 | 0.087730471 | SBF1P1      |

|                 |             |             |              |             |             |            |
|-----------------|-------------|-------------|--------------|-------------|-------------|------------|
| ENSG00000164100 | 8.907219042 | 0           | 5.488205869  | 0.041528346 | 0.087778685 | NDST3      |
| ENSG00000143947 | 7982.567956 | 12332.84332 | -0.627589979 | 0.041536099 | 0.087778685 | RPS27A     |
| ENSG00000220392 | 3.89780676  | 0           | 4.297790016  | 0.041536167 | 0.087778685 | FCF1P5     |
| ENSG00000260012 | 3.89780676  | 0           | 4.297790016  | 0.041536167 | 0.087778685 | AC007494.1 |
| ENSG00000117971 | 16.9595747  | 0.356539013 | 5.45561095   | 0.041545384 | 0.087791023 | CHRNB4     |
| ENSG00000228192 | 44.74774909 | 23.85593839 | 0.910713127  | 0.041565367 | 0.087816126 | AL512353.1 |
| ENSG00000231156 | 6.771293394 | 0           | 5.092278667  | 0.041566462 | 0.087816126 | AC093702.1 |
| ENSG00000155287 | 951.6107263 | 645.6613339 | 0.559693919  | 0.041567404 | 0.087816126 | SLC25A28   |
| ENSG00000255008 | 12.58345675 | 2.547679642 | 2.310308183  | 0.041597306 | 0.087872153 | AP000442.1 |
| ENSG00000253857 | 7.107087378 | 0           | 5.164078674  | 0.041623283 | 0.087919879 | AC022679.1 |
| ENSG00000140043 | 66.71491296 | 39.14574065 | 0.76668352   | 0.041696788 | 0.088067983 | PTGR2      |
| ENSG00000102471 | 629.3756082 | 958.8492198 | -0.607703886 | 0.041714214 | 0.088097625 | NDFIP2     |
| ENSG00000187066 | 2.403879708 | 9.243956249 | -1.940952086 | 0.041743006 | 0.088151266 | TMEM262    |
| ENSG00000236753 | 107.9813101 | 64.4916384  | 0.741984816  | 0.041757283 | 0.088174251 | MKLN1-AS   |
| ENSG00000286084 | 21.11516414 | 6.286546772 | 1.76056485   | 0.041765483 | 0.088181587 | AL096794.1 |
| ENSG00000273151 | 174.9088465 | 88.14786613 | 0.989746522  | 0.041767546 | 0.088181587 | AC073957.3 |
| ENSG00000237976 | 20.16871313 | 6.594775252 | 1.59797452   | 0.041791263 | 0.088218674 | AL391069.2 |
| ENSG00000105135 | 964.8336428 | 1293.710916 | -0.423350779 | 0.041791904 | 0.088218674 | ILVBL      |
| ENSG00000187735 | 1316.336926 | 1756.207462 | -0.415975368 | 0.041804877 | 0.088238891 | TCEA1      |
| ENSG00000143369 | 561.7621058 | 1279.110609 | -1.187203775 | 0.041817609 | 0.088258594 | ECM1       |
| ENSG00000237481 | 4.543495031 | 0.387220594 | 3.55564216   | 0.041822151 | 0.08826101  | AL117350.1 |
| ENSG00000061337 | 874.5194518 | 216.2129385 | 2.015558568  | 0.04183794  | 0.08828716  | LZTS1      |
| ENSG00000203497 | 36.09372505 | 18.34267693 | 0.976989003  | 0.041856335 | 0.088318805 | PDCD4-AS1  |
| novel.1083      | 15.043751   | 5.013927024 | 1.585329682  | 0.041865659 | 0.088320676 | -          |
| ENSG00000259230 | 0.908699006 | 8.908770602 | -3.299359577 | 0.041867371 | 0.088320676 | LINC02323  |
| ENSG00000140274 | 6.841569346 | 0           | 5.108980133  | 0.04186742  | 0.088320676 | DUOXA2     |
| ENSG00000136450 | 1080.381219 | 1535.429873 | -0.507322718 | 0.041932741 | 0.08845129  | SRSF1      |
| ENSG00000231172 | 0.307102255 | 4.391737868 | -3.749814552 | 0.041943748 | 0.088467326 | AC007099.1 |
| ENSG00000179918 | 737.1246199 | 1102.736654 | -0.58139437  | 0.041950284 | 0.088473928 | SEPHS2     |
| ENSG00000102977 | 334.6498854 | 485.2822165 | -0.536319363 | 0.0419553   | 0.088474697 | ACD        |
| ENSG00000125618 | 66.93121016 | 188.044533  | -1.490764327 | 0.041957459 | 0.088474697 | PAX8       |
| ENSG00000197417 | 62.19057866 | 98.94930946 | -0.672211358 | 0.041977013 | 0.088508747 | SHPK       |
| ENSG00000135821 | 12138.06629 | 6582.173289 | 0.882905165  | 0.042010791 | 0.088571955 | GLUL       |
| ENSG00000277873 | 9.465906652 | 1.722487775 | 2.427992242  | 0.042016604 | 0.088571955 | AC131159.2 |
| ENSG00000137200 | 1067.614345 | 1449.646235 | -0.441098613 | 0.042017218 | 0.088571955 | CMTR1      |
| ENSG00000100726 | 874.4260715 | 1294.485148 | -0.565953288 | 0.042034519 | 0.088601237 | TELO2      |
| ENSG00000153904 | 925.4933955 | 1889.19769  | -1.02963924  | 0.042082598 | 0.088693894 | DDAH1      |
| ENSG00000165943 | 13.88088807 | 4.596024848 | 1.585527841  | 0.042085306 | 0.088693894 | MOAP1      |
| ENSG00000237529 | 6.951135685 | 0.774441189 | 3.230357576  | 0.042104473 | 0.088727091 | AL137847.2 |
| ENSG00000270300 | 9.051745355 | 1.456837632 | 2.645464277  | 0.042110232 | 0.08873203  | PHACTR2P1  |
| ENSG00000151338 | 101.3601987 | 164.0963871 | -0.696393997 | 0.042118339 | 0.088741916 | MIPOL1     |
| ENSG00000286689 | 11.9337228  | 2.120320855 | 2.486280098  | 0.042141221 | 0.088782929 | AC090946.1 |
| ENSG00000168096 | 633.9363418 | 446.6625919 | 0.505338988  | 0.042152846 | 0.088797887 | ANKS3      |
| ENSG00000251359 | 30.41265388 | 9.720781443 | 1.657718241  | 0.042155157 | 0.088797887 | WWC2-AS2   |
| ENSG00000234840 | 32.26311748 | 6.052734086 | 2.427517971  | 0.042192364 | 0.088869056 | LINC01239  |
| ENSG00000226669 | 7.197777715 | 1.049547942 | 2.757904209  | 0.042210831 | 0.088900746 | AL354977.1 |
| ENSG00000166532 | 943.4112339 | 603.8302546 | 0.643237822  | 0.042227139 | 0.088927883 | RIMKLB     |
| ENSG00000181652 | 7.459534802 | 32.20820253 | -2.104376864 | 0.042232945 | 0.088928652 | ATG9B      |
| ENSG00000251637 | 4.578739738 | 0           | 4.527815242  | 0.04223435  | 0.088928652 | AP003716.1 |
| ENSG00000188895 | 2781.368948 | 2046.464699 | 0.442774086  | 0.04223921  | 0.088931678 | MSL1       |
| ENSG00000280047 | 44.19386226 | 15.942673   | 1.46239154   | 0.042244957 | 0.088936571 | AC091825.1 |

|                 |             |             |              |             |             |            |
|-----------------|-------------|-------------|--------------|-------------|-------------|------------|
| ENSG00000143753 | 2127.481896 | 3017.287687 | -0.504227543 | 0.042254767 | 0.088950015 | DEGS1      |
| ENSG00000197961 | 493.4459282 | 328.3169476 | 0.58792448   | 0.042308918 | 0.089056792 | ZNF121     |
| ENSG00000110697 | 954.629118  | 1488.697633 | -0.641049082 | 0.042323337 | 0.089079926 | PITPNM1    |
| ENSG00000166847 | 1055.725239 | 1410.370636 | -0.417963409 | 0.042418413 | 0.089272805 | DCTN5      |
| ENSG00000155816 | 530.6917876 | 321.5222393 | 0.723879771  | 0.04242398  | 0.08927729  | FMN2       |
| ENSG00000157077 | 358.3010613 | 529.8023313 | -0.563844288 | 0.042437871 | 0.089299289 | ZFYVE9     |
| ENSG00000114126 | 1048.745443 | 748.4742318 | 0.487074417  | 0.042442484 | 0.089301764 | TFDP2      |
| ENSG00000187672 | 18.12605639 | 5.186248153 | 1.819977421  | 0.042470827 | 0.089354163 | ERC2       |
| ENSG00000131730 | 50.76442861 | 16.51637605 | 1.619188969  | 0.042486524 | 0.089375178 | CKMT2      |
| ENSG00000223573 | 13.20622334 | 4.01512976  | 1.7303908    | 0.042487696 | 0.089375178 | TINCR      |
| ENSG00000115234 | 2038.931421 | 2943.051509 | -0.529595795 | 0.042541995 | 0.089479335 | SNX17      |
| ENSG00000134153 | 1365.484798 | 1919.174368 | -0.491197167 | 0.042544375 | 0.089479335 | EMC7       |
| ENSG00000124209 | 1151.834157 | 884.9297802 | 0.380142359  | 0.042547543 | 0.089479335 | RAB22A     |
| ENSG00000227999 | 10.15790901 | 2.191140629 | 2.22731205   | 0.042565195 | 0.08950912  | MTND5P1    |
| ENSG00000276966 | 14.63238173 | 4.637318915 | 1.652799049  | 0.042569348 | 0.08950912  | HIST1H4E   |
| ENSG00000102539 | 5.072023799 | 0.356539013 | 3.716987359  | 0.042572041 | 0.08950912  | MLNR       |
| ENSG00000283511 | 11.14469059 | 1.548882377 | 2.8915058    | 0.042586867 | 0.089533047 | AC137936.2 |
| ENSG00000270194 | 16.31241932 | 41.17042074 | -1.335461989 | 0.042596723 | 0.089546521 | AC097359.2 |
| ENSG00000164603 | 189.4768489 | 288.0125333 | -0.603735954 | 0.042627724 | 0.089604441 | BMT2       |
| ENSG00000248773 | 4.295599352 | 0           | 4.435025786  | 0.042674398 | 0.089695294 | AC108727.1 |
| ENSG00000214100 | 4.291838406 | 0           | 4.433867494  | 0.042727882 | 0.089800445 | PLAC9P1    |
| ENSG00000267648 | 27.40961345 | 11.65945295 | 1.224849444  | 0.04276244  | 0.089865806 | AC060766.5 |
| ENSG00000234129 | 3.063429386 | 11.05733289 | -1.860611707 | 0.042795962 | 0.089928978 | AC073529.1 |
| ENSG00000169248 | 87.02896351 | 17.6201423  | 2.304197541  | 0.042844256 | 0.09002318  | CXCL11     |
| ENSG00000262468 | 39.7537366  | 20.59762087 | 0.94347595   | 0.042867135 | 0.090056921 | LINC01569  |
| ENSG00000153404 | 24.92020019 | 4.148596966 | 2.574755924  | 0.042867506 | 0.090056921 | PLEKHG4B   |
| ENSG00000083093 | 177.1393935 | 249.1037818 | -0.492220226 | 0.042870968 | 0.090056921 | PALB2      |
| ENSG00000197380 | 343.5471458 | 164.1665521 | 1.066727412  | 0.042875889 | 0.090056921 | DACT3      |
| ENSG00000257017 | 6.217264375 | 0.356539013 | 4.010687102  | 0.042877646 | 0.090056921 | HP         |
| ENSG00000177663 | 1132.722817 | 721.9404389 | 0.650298139  | 0.042901327 | 0.090099377 | IL17RA     |
| ENSG00000274520 | 4.284245242 | 0           | 4.43151012   | 0.042914089 | 0.09011161  | RF02246    |
| ENSG00000280200 | 4.284245242 | 0           | 4.43151012   | 0.042914089 | 0.09011161  | AC073862.5 |
| novel.269       | 4.54474868  | 0.387220594 | 3.555980383  | 0.042942486 | 0.09016128  | -          |
| ENSG00000164902 | 651.6662987 | 963.4841329 | -0.564478084 | 0.042944684 | 0.09016128  | PHAX       |
| ENSG00000254978 | 3.04831433  | 11.64768459 | -1.941972788 | 0.042990831 | 0.090250872 | ALG1L9P    |
| ENSG00000143320 | 269.426047  | 75.38050298 | 1.836674861  | 0.043008196 | 0.090280031 | CRABP2     |
| ENSG00000110060 | 125.7343903 | 186.9119302 | -0.572883422 | 0.043052609 | 0.090365958 | PUS3       |
| ENSG00000258591 | 4.558610087 | 0.356539013 | 3.559728169  | 0.043060964 | 0.090376194 | PPIAP4     |
| ENSG00000200502 | 4.529633624 | 0.387220594 | 3.551894542  | 0.043067761 | 0.090383158 | RF00019    |
| ENSG00000185800 | 743.3262313 | 1094.694202 | -0.558218383 | 0.043092092 | 0.090426916 | DMWD       |
| ENSG00000225648 | 619.7581668 | 366.6568889 | 0.756575963  | 0.04310516  | 0.090447033 | SBDSP1     |
| ENSG00000227063 | 491.1772688 | 858.5436486 | -0.805940337 | 0.043121994 | 0.090475049 | RPL41P1    |
| ENSG00000179862 | 110.8958827 | 223.9555272 | -1.012700941 | 0.043159465 | 0.090546356 | CITED4     |
| ENSG00000280129 | 7.282199808 | 1.467450118 | 2.329233304  | 0.043182178 | 0.09058669  | AL132780.5 |
| novel.417       | 61.30688171 | 113.1173654 | -0.883007059 | 0.04320674  | 0.09062834  | -          |
| ENSG00000145725 | 1002.959968 | 691.8007097 | 0.535398239  | 0.043209009 | 0.09062834  | PPIP5K2    |
| ENSG00000243406 | 32.42841418 | 12.19661383 | 1.411340036  | 0.043233163 | 0.090666983 | MRPS31P5   |
| ENSG00000124535 | 1042.543135 | 1378.664033 | -0.403052981 | 0.043234412 | 0.090666983 | WRNIP1     |
| ENSG00000229692 | 34.60237657 | 15.13254155 | 1.203302704  | 0.043238803 | 0.090668873 | SOS1-IT1   |
| ENSG00000258334 | 0.307102255 | 4.361056287 | -3.741372872 | 0.043245143 | 0.090674849 | AC125611.4 |
| ENSG00000140939 | 337.6694364 | 548.8488058 | -0.700256681 | 0.043255602 | 0.090689461 | AC074143.1 |

|                 |             |             |              |             |             |            |
|-----------------|-------------|-------------|--------------|-------------|-------------|------------|
| ENSG00000108423 | 136.4850492 | 87.87190747 | 0.632918861  | 0.043298527 | 0.090772132 | TUBD1      |
| ENSG00000276542 | 6.827707938 | 0           | 5.106146377  | 0.043337392 | 0.090846278 | AC097478.2 |
| ENSG00000287037 | 0           | 5.919395274 | -5.144551325 | 0.043347934 | 0.090861046 | AC097709.1 |
| ENSG00000237172 | 295.6995952 | 627.1111119 | -1.084824592 | 0.043356651 | 0.090871986 | B3GNT9     |
| ENSG00000162877 | 14.59964432 | 2.882993683 | 2.340962867  | 0.043368519 | 0.09088953  | PM20D1     |
| ENSG00000117448 | 1284.222183 | 1751.987802 | -0.44800386  | 0.043377486 | 0.090899588 | AKR1A1     |
| ENSG00000260641 | 12.65881856 | 29.04475508 | -1.199511029 | 0.043380316 | 0.090899588 | AC114811.2 |
| ENSG00000270972 | 4.529633624 | 0.336469917 | 3.551891043  | 0.043460827 | 0.091060946 | AC136475.9 |
| ENSG00000256540 | 4.240153722 | 0           | 4.417799672  | 0.043474339 | 0.09107457  | AC007406.3 |
| ENSG00000222585 | 4.240153722 | 0           | 4.417799672  | 0.043474339 | 0.09107457  | RNA5SP494  |
| ENSG00000224468 | 65.10931171 | 19.55521779 | 1.734557845  | 0.043505534 | 0.091132571 | LAMC1-AS1  |
| ENSG00000232653 | 6.76502515  | 0           | 5.09101147   | 0.043561036 | 0.091241477 | GOLGA8N    |
| novel.642       | 25.16293909 | 67.70416708 | -1.425390719 | 0.043584998 | 0.091284308 | -          |
| ENSG00000136273 | 249.733483  | 330.2163329 | -0.402797554 | 0.043601541 | 0.091307122 | HUS1       |
| ENSG00000234286 | 4.231378181 | 0           | 4.415069073  | 0.04360292  | 0.091307122 | AC006026.3 |
| ENSG00000274943 | 4.25401513  | 13.74780796 | -1.692109199 | 0.043619849 | 0.091331911 | AC079684.1 |
| ENSG00000235641 | 17.06996777 | 3.392940604 | 2.352180132  | 0.043621788 | 0.091331911 | LINC00484  |
| ENSG00000103479 | 1554.573474 | 1036.032565 | 0.585745847  | 0.043645598 | 0.091368503 | RBL2       |
| ENSG00000174680 | 30.34814798 | 5.003186144 | 2.617692318  | 0.043646299 | 0.091368503 | GRIK1-AS1  |
| ENSG00000022976 | 144.0410444 | 211.9685599 | -0.557490167 | 0.043737502 | 0.091552049 | ZNF839     |
| ENSG00000127074 | 3.649911081 | 0           | 4.200868891  | 0.043742837 | 0.09155584  | RGS13      |
| ENSG00000287129 | 8.211028466 | 1.803920035 | 2.189668029  | 0.043761767 | 0.091588084 | AC097500.1 |
| ENSG00000287817 | 23.01580187 | 10.03846653 | 1.196534067  | 0.043791759 | 0.091643471 | AL096701.4 |
| ENSG00000170854 | 322.6505727 | 518.4535726 | -0.684902202 | 0.043830746 | 0.091716711 | RIOX2      |
| ENSG00000103245 | 594.9642859 | 415.9442203 | 0.516294157  | 0.043833817 | 0.091716711 | CIAO3      |
| ENSG00000120370 | 204.6762669 | 308.4326959 | -0.590718599 | 0.04384712  | 0.091731773 | GORAB      |
| ENSG00000260409 | 6.64535835  | 0           | 5.066195186  | 0.043848077 | 0.091731773 | AC012414.5 |
| ENSG00000224809 | 3.97463569  | 0           | 4.323244096  | 0.04386346  | 0.091756566 | BEND3P2    |
| ENSG00000095002 | 462.7835952 | 694.6626883 | -0.586376433 | 0.043869543 | 0.091761904 | MSH2       |
| ENSG00000169379 | 397.158707  | 286.4739722 | 0.470805447  | 0.04392648  | 0.091868333 | ARL13B     |
| ENSG00000286339 | 29.17972882 | 2.954969332 | 3.310536541  | 0.043928661 | 0.091868333 | Z99496.2   |
| ENSG00000258088 | 0           | 3.586615098 | -4.424074729 | 0.043936018 | 0.091868333 | AC078820.1 |
| ENSG00000196747 | 0           | 3.586615098 | -4.424074729 | 0.043936018 | 0.091868333 | HIST1H2AI  |
| ENSG00000283599 | 3.636049674 | 0           | 4.195974914  | 0.043941641 | 0.091868333 | BX276092.9 |
| ENSG00000180745 | 3.636049674 | 0           | 4.195974914  | 0.043941641 | 0.091868333 | CLRN3      |
| ENSG00000286446 | 3.968367446 | 0           | 4.321184347  | 0.043959805 | 0.091898913 | AL353688.1 |
| ENSG00000213025 | 2.684512796 | 13.9238535  | -2.372407333 | 0.043970072 | 0.09191298  | COX20P1    |
| ENSG00000111642 | 892.7805205 | 615.4024157 | 0.536918084  | 0.04398229  | 0.091931123 | CHD4       |
| ENSG00000170855 | 459.5421467 | 765.3092645 | -0.736240204 | 0.043992446 | 0.091944956 | TRIAP1     |
| ENSG00000257773 | 7.284707106 | 17.59891732 | -1.273811616 | 0.044051292 | 0.092060538 | ST13P3     |
| ENSG00000112183 | 19.46653904 | 53.0489643  | -1.444997631 | 0.044063239 | 0.092078099 | RBM24      |
| ENSG00000157021 | 29.58551367 | 54.04202937 | -0.865862631 | 0.044068145 | 0.092080946 | FAM92A1P1  |
| ENSG00000233639 | 3.960774282 | 0           | 4.318664541  | 0.044077174 | 0.092085001 | PANTR1     |
| ENSG00000228718 | 3.960774282 | 0           | 4.318664541  | 0.044077174 | 0.092085001 | LINC02521  |
| ENSG00000285079 | 4.735945081 | 0           | 4.579581798  | 0.044083541 | 0.09208694  | AL513493.1 |
| ENSG00000185885 | 1899.546499 | 5427.281284 | -1.514602437 | 0.044085191 | 0.09208694  | IFITM1     |
| ENSG00000265786 | 4.734691432 | 0           | 4.579227577  | 0.044100713 | 0.092111957 | LINC01906  |
| ENSG00000166819 | 13.77633633 | 3.944309986 | 1.806237243  | 0.044140051 | 0.092186709 | PLIN1      |
| ENSG00000139117 | 261.547523  | 135.3784698 | 0.94944716   | 0.044145083 | 0.092189807 | CPNE8      |
| ENSG00000180376 | 332.6342395 | 231.5392233 | 0.522305961  | 0.044149742 | 0.092192128 | CCDC66     |
| ENSG00000260032 | 8271.931165 | 6074.614473 | 0.445431588  | 0.044161313 | 0.092208879 | NORAD      |

|                 |             |             |              |             |             |             |
|-----------------|-------------|-------------|--------------|-------------|-------------|-------------|
| ENSG00000230177 | 72.24386465 | 43.95422482 | 0.715615395  | 0.044182633 | 0.092217211 | AL080317.1  |
| ENSG00000110148 | 3.620934617 | 0           | 4.190626865  | 0.044185222 | 0.092217211 | CCKBR       |
| ENSG00000255398 | 3.620934617 | 0           | 4.190626865  | 0.044185222 | 0.092217211 | HCAR3       |
| ENSG00000236958 | 3.620934617 | 0           | 4.190626865  | 0.044185222 | 0.092217211 | AC051618.1  |
| ENSG00000155719 | 3.95325239  | 0           | 4.316186335  | 0.044193699 | 0.092217211 | OTOA        |
| ENSG00000269489 | 3.95325239  | 0           | 4.316186335  | 0.044193699 | 0.092217211 | AL589765.6  |
| ENSG00000277214 | 3.95325239  | 0           | 4.316186335  | 0.044193699 | 0.092217211 | AC009159.2  |
| ENSG00000275197 | 3.95325239  | 0           | 4.316186335  | 0.044193699 | 0.092217211 | AC092794.2  |
| ENSG00000172367 | 3.619680969 | 0           | 4.190184895  | 0.044205504 | 0.092234436 | PDZD3       |
| ENSG00000105854 | 3398.573981 | 2064.753165 | 0.718834681  | 0.044229026 | 0.092273402 | PON2        |
| ENSG00000268942 | 4.261608293 | 14.727692   | -1.791283675 | 0.044231282 | 0.092273402 | CKS1BP3     |
| ENSG00000141646 | 1519.543018 | 1095.103384 | 0.47279705   | 0.044242253 | 0.092288878 | SMAD4       |
| ENSG00000126947 | 1055.229979 | 727.5994151 | 0.53664625   | 0.044280196 | 0.092360611 | ARMCX1      |
| ENSG00000233382 | 32.9421839  | 16.12085472 | 1.030378308  | 0.044313783 | 0.092423247 | NKAPP1      |
| ENSG00000064703 | 308.377093  | 428.9961465 | -0.476558375 | 0.044323398 | 0.092435881 | DDX20       |
| ENSG00000162585 | 858.178072  | 1225.896104 | -0.514191245 | 0.044327758 | 0.092437553 | FAAP20      |
| ENSG00000272849 | 40.20794373 | 21.45105417 | 0.912632981  | 0.044366311 | 0.092510524 | AC084018.1  |
| ENSG00000198315 | 790.1323926 | 527.2853332 | 0.583909308  | 0.044395818 | 0.092564622 | ZKSCAN8     |
| ENSG00000265185 | 6.678024489 | 0           | 5.073001588  | 0.044460017 | 0.092691036 | SNORD3B-1   |
| ENSG00000264769 | 3.960774282 | 13.78679027 | -1.800273599 | 0.04450025  | 0.092767472 | AC145207.8  |
| ENSG00000212664 | 39.14580033 | 67.67083542 | -0.790813625 | 0.044543863 | 0.092850939 | AC064799.1  |
| ENSG00000157782 | 15.7687755  | 80.6857874  | -2.354503991 | 0.04458979  | 0.092939216 | CABP1       |
| ENSG00000138663 | 517.465419  | 822.1865249 | -0.668317568 | 0.044613791 | 0.092981782 | COP54       |
| ENSG00000129910 | 215.1502831 | 84.98321595 | 1.342194175  | 0.044659892 | 0.093067512 | CDH15       |
| ENSG00000273311 | 19.77092054 | 42.60834516 | -1.105144547 | 0.044662089 | 0.093067512 | DGCR11      |
| ENSG00000196141 | 1089.234843 | 1843.965135 | -0.759687265 | 0.044672432 | 0.0930816   | SPATS2L     |
| ENSG00000143365 | 5.826024761 | 0.336469917 | 3.91290089   | 0.044708119 | 0.093148488 | RORC        |
| ENSG00000168310 | 711.6814475 | 476.6137487 | 0.578923912  | 0.044721341 | 0.093168563 | IRF2        |
| ENSG00000175664 | 6.776307989 | 0           | 5.093340106  | 0.044735625 | 0.093190849 | TEX26       |
| ENSG00000072952 | 297.4016283 | 102.2179011 | 1.539492903  | 0.044762473 | 0.093239301 | MRV11       |
| ENSG00000275393 | 2.460578986 | 11.29101719 | -2.203582708 | 0.044775745 | 0.09325947  | AC018695.6  |
| ENSG00000218305 | 5.783258161 | 17.30374147 | -1.582560134 | 0.04478119  | 0.093263335 | CDC14C      |
| ENSG00000112232 | 4.290584757 | 0           | 4.433518018  | 0.044806989 | 0.093309585 | KHDRBS2     |
| ENSG00000198561 | 4935.555821 | 3753.33201  | 0.395092743  | 0.044818091 | 0.093325224 | CTNND1      |
| novel.614       | 101.8957508 | 35.23005729 | 1.529269884  | 0.044843722 | 0.093371113 | -           |
| ENSG00000235308 | 11.98032161 | 2.261960402 | 2.433411871  | 0.044857619 | 0.093392564 | AL445991.1  |
| ENSG00000225376 | 8.901777171 | 0.672939833 | 3.681042432  | 0.044878295 | 0.093428123 | TMEM246-AS1 |
| ENSG00000124201 | 1453.629615 | 1840.792283 | -0.340656446 | 0.044884836 | 0.093432065 | ZNFX1       |
| ENSG00000142937 | 16055.54342 | 21696.65376 | -0.434412782 | 0.044887381 | 0.093432065 | RPS8        |
| ENSG00000241560 | 11.43291684 | 2.587817834 | 2.161907069  | 0.044905974 | 0.093463279 | ZBTB20-AS1  |
| novel.597       | 25.24958374 | 6.297287652 | 1.99545251   | 0.044923334 | 0.09349192  | -           |
| ENSG00000278318 | 89.93269552 | 168.1205411 | -0.9020232   | 0.044947456 | 0.09353463  | ZNF229      |
| ENSG00000261534 | 134.0125467 | 201.3357133 | -0.585854785 | 0.044964483 | 0.093562569 | AL596244.1  |
| ENSG00000163930 | 1552.572515 | 2063.173213 | -0.41024897  | 0.044975554 | 0.093575592 | BAP1        |
| ENSG00000164080 | 710.1863571 | 404.5845536 | 0.811967454  | 0.044977945 | 0.093575592 | RAD54L2     |
| ENSG00000182185 | 53.67753381 | 91.45150611 | -0.771081392 | 0.04501741  | 0.093650198 | RAD51B      |
| ENSG00000180917 | 60.1112101  | 29.0979459  | 1.040789086  | 0.045064055 | 0.093739729 | CMTR2       |
| ENSG00000213225 | 12.87676887 | 35.66892765 | -1.473719231 | 0.045084767 | 0.093775305 | NOC2LP1     |
| novel.866       | 61.80255871 | 20.32020236 | 1.603120321  | 0.045098582 | 0.09379653  | -           |
| ENSG00000087157 | 559.2446043 | 816.7447474 | -0.546014154 | 0.045119538 | 0.0938263   | PGS1        |
| ENSG00000153922 | 995.7257787 | 694.1692957 | 0.520322598  | 0.045120118 | 0.0938263   | CHD1        |

|                 |             |             |              |             |             |            |
|-----------------|-------------|-------------|--------------|-------------|-------------|------------|
| ENSG00000118689 | 967.4486629 | 1272.518166 | -0.395430318 | 0.045139331 | 0.093856253 | FOXO3      |
| ENSG00000161013 | 1.803536605 | 7.988965452 | -2.138534314 | 0.045141747 | 0.093856253 | MGAT4B     |
| ENSG00000127083 | 681.8566932 | 38.19106278 | 4.157541993  | 0.045205759 | 0.093981822 | OMD        |
| novel.199       | 11.02627744 | 1.844058227 | 2.59733174   | 0.045227179 | 0.094018829 | -          |
| ENSG00000212993 | 7.194016769 | 0.774441189 | 3.278158657  | 0.045234334 | 0.094025139 | POU5F1B    |
| ENSG00000205106 | 5.527769318 | 0.336469917 | 3.836720657  | 0.045237452 | 0.094025139 | AC044839.1 |
| ENSG00000214855 | 8.416086274 | 1.069617038 | 2.97117333   | 0.045241613 | 0.094026266 | APOC1P1    |
| ENSG00000186867 | 6.444061488 | 22.2280639  | -1.792948119 | 0.045263531 | 0.094064295 | QRFRP      |
| ENSG00000262406 | 0           | 3.963223207 | -4.567527059 | 0.045302551 | 0.094136612 | MMP12      |
| ENSG00000179921 | 13.6871131  | 3.11911812  | 2.114530312  | 0.045308156 | 0.094136612 | GPBAR1     |
| novel.105       | 21.07490484 | 7.071600447 | 1.592051721  | 0.0453092   | 0.094136612 | -          |
| ENSG00000255062 | 31.2027972  | 13.77977381 | 1.172569521  | 0.045334207 | 0.094181036 | AP001318.2 |
| ENSG00000087448 | 867.5443424 | 642.982918  | 0.432251834  | 0.045343886 | 0.094193611 | KLHL42     |
| ENSG00000013297 | 1582.030483 | 3622.121004 | -1.195105658 | 0.045362375 | 0.094224486 | CLDN11     |
| ENSG00000116014 | 0.307102255 | 6.755199626 | -4.371333859 | 0.045388892 | 0.094272029 | KISS1R     |
| ENSG00000273132 | 0           | 3.506338714 | -4.395023611 | 0.045403926 | 0.094289066 | AL355312.4 |
| ENSG00000250427 | 7.706390295 | 0           | 5.279034216  | 0.045404354 | 0.094289066 | LINC02148  |
| ENSG00000104447 | 362.2380868 | 241.5971982 | 0.584784872  | 0.045454571 | 0.094385806 | TRPS1      |
| ENSG00000067798 | 1258.237152 | 757.3675436 | 0.732583978  | 0.045486414 | 0.094444381 | NAV3       |
| ENSG00000006607 | 496.7130759 | 768.8693628 | -0.630362674 | 0.045492895 | 0.094450289 | FARP2      |
| ENSG00000261461 | 13.60150863 | 30.84379483 | -1.178372694 | 0.045528127 | 0.094515882 | UBE2MP1    |
| ENSG00000233435 | 4.810266713 | 0.387220594 | 3.63933058   | 0.045538027 | 0.094528881 | AGGF1P2    |
| ENSG00000124493 | 0.307102255 | 4.433031935 | -3.76144944  | 0.045545668 | 0.094537189 | GRM4       |
| ENSG00000240087 | 41.9418173  | 95.44973043 | -1.184846065 | 0.04556725  | 0.09457443  | RPSAP12    |
| ENSG00000198342 | 51.49898375 | 23.338975   | 1.137038753  | 0.045572839 | 0.094578475 | ZNF442     |
| ENSG00000111271 | 445.8597078 | 665.1872231 | -0.576702284 | 0.04559894  | 0.094625085 | ACAD10     |
| ENSG00000242852 | 11.76272732 | 3.271370153 | 1.855455585  | 0.04560797  | 0.094636264 | ZNF709     |
| ENSG00000266501 | 2.709728314 | 11.17060261 | -2.039355368 | 0.045616098 | 0.094645572 | AC025198.1 |
| ENSG00000140948 | 760.7032304 | 517.3592033 | 0.556508142  | 0.045639165 | 0.094685869 | ZCCHC14    |
| ENSG00000255142 | 12.00428348 | 28.45183484 | -1.23828477  | 0.045654944 | 0.094711043 | AP006621.2 |
| ENSG00000152049 | 357.6244688 | 106.8312982 | 1.742438013  | 0.045705427 | 0.0948082   | KCNE4      |
| ENSG00000258045 | 8.179544705 | 1.854670712 | 2.1667565    | 0.045752236 | 0.094897721 | RF00017    |
| ENSG00000185737 | 6.564697203 | 0.723690511 | 3.191365427  | 0.04579637  | 0.094981679 | NRG3       |
| ENSG00000267282 | 0.616711807 | 6.154363836 | -3.332124401 | 0.045815855 | 0.095014507 | AC011481.2 |
| ENSG00000139697 | 818.8950534 | 1133.075986 | -0.468193771 | 0.045836905 | 0.095050573 | SBNO1      |
| ENSG00000136100 | 1076.4475   | 780.9220385 | 0.462742947  | 0.045841356 | 0.095052216 | VPS36      |
| ENSG00000116783 | 6.548328498 | 0           | 5.045769709  | 0.045853449 | 0.095069703 | TNNI3K     |
| ENSG00000106992 | 125.2074433 | 193.1886824 | -0.625090267 | 0.045874572 | 0.09510591  | AK1        |
| ENSG00000083223 | 543.4800886 | 911.0142149 | -0.744957242 | 0.045885555 | 0.095121089 | TUT7       |
| ENSG00000159873 | 341.1595208 | 480.0127251 | -0.49264595  | 0.045891967 | 0.09512679  | CCDC117    |
| ENSG00000170775 | 4.751060137 | 17.59061659 | -1.880874216 | 0.04591113  | 0.09515892  | GPR37      |
| ENSG00000153560 | 1313.554731 | 1710.681121 | -0.381087612 | 0.045939074 | 0.095209245 | UBP1       |
| novel.746       | 9.109698282 | 28.28683415 | -1.638734591 | 0.045994417 | 0.095308878 | -          |
| ENSG00000177082 | 87.5380899  | 134.5911044 | -0.620915096 | 0.045994485 | 0.095308878 | WDR73      |
| ENSG00000231989 | 2.723589721 | 10.05853563 | -1.884265956 | 0.046009592 | 0.095332579 | PPP1R2B    |
| ENSG00000255423 | 35.99522809 | 15.96847429 | 1.178046077  | 0.046021421 | 0.095349484 | EBLN2      |
| ENSG00000183837 | 16.16789301 | 5.482579877 | 1.568818889  | 0.046048267 | 0.095397499 | PNMA3      |
| ENSG00000273375 | 7.463295748 | 0.774441189 | 3.329710835  | 0.046053459 | 0.095400648 | AC055764.2 |
| ENSG00000260823 | 0.616711807 | 10.50467924 | -4.09793119  | 0.046061138 | 0.095408948 | AC026461.3 |
| ENSG00000125347 | 806.2419607 | 485.8012092 | 0.731471083  | 0.0460754   | 0.095430882 | IRF1       |
| ENSG00000285257 | 13.23645345 | 4.239485835 | 1.633954669  | 0.046105601 | 0.095485821 | AL157893.1 |

|                 |             |             |              |             |             |            |
|-----------------|-------------|-------------|--------------|-------------|-------------|------------|
| ENSG00000135443 | 6.461683842 | 0           | 5.024750867  | 0.046115687 | 0.095499096 | KRT85      |
| ENSG00000184434 | 4.530887272 | 0.356539013 | 3.552207856  | 0.046159048 | 0.095581272 | LRRC19     |
| ENSG00000261114 | 23.85136162 | 11.13876515 | 1.099962922  | 0.04616521  | 0.095586414 | AC012181.1 |
| ENSG00000240602 | 1.7871679   | 10.81303612 | -2.592902716 | 0.046179323 | 0.095600782 | AADACP1    |
| ENSG00000222898 | 0           | 3.912472529 | -4.550725389 | 0.046179509 | 0.095600782 | RN7SKP97   |
| ENSG00000187953 | 165.9268633 | 259.2934729 | -0.644258956 | 0.046198919 | 0.095633345 | PMS2CL     |
| novel.13        | 43.94445638 | 0           | 7.791171921  | 0.04622416  | 0.095677972 | -          |
| ENSG00000144834 | 3.029438327 | 15.54928785 | -2.356484792 | 0.046243452 | 0.095710278 | TAGLN3     |
| ENSG00000177051 | 218.5003131 | 296.4621548 | -0.439581605 | 0.046262356 | 0.095741776 | FBXO46     |
| ENSG00000128274 | 293.0836052 | 790.960227  | -1.432509547 | 0.046284664 | 0.095780315 | A4GALT     |
| ENSG00000259828 | 2.15473038  | 11.16127439 | -2.385876551 | 0.046293884 | 0.095791765 | AL355596.1 |
| ENSG00000149639 | 1120.397756 | 1657.329343 | -0.5648331   | 0.046318273 | 0.095834598 | SOGA1      |
| ENSG00000157150 | 34.33567581 | 115.1630265 | -1.747522717 | 0.046337882 | 0.095865261 | TIMP4      |
| ENSG00000265972 | 11081.18653 | 5715.497385 | 0.955194386  | 0.046346752 | 0.095865261 | TXNIP      |
| ENSG00000152147 | 201.9000236 | 317.3705383 | -0.653551726 | 0.046347172 | 0.095865261 | GEMIN6     |
| ENSG00000174028 | 125.1732666 | 202.7147147 | -0.695483466 | 0.046347852 | 0.095865261 | FAM3C2     |
| ENSG00000258744 | 22.29342686 | 52.36456008 | -1.233759753 | 0.046351942 | 0.095866088 | AL132800.1 |
| ENSG00000104964 | 6162.493984 | 4574.125679 | 0.430066756  | 0.046364701 | 0.095884845 | TLE5       |
| ENSG00000279086 | 3.050821627 | 11.39495869 | -1.90722113  | 0.046388879 | 0.095927209 | AC073130.3 |
| ENSG00000166900 | 599.86684   | 307.0370462 | 0.96706712   | 0.046411746 | 0.095961518 | STX3       |
| ENSG00000186298 | 1807.071028 | 2683.59009  | -0.57057107  | 0.046412857 | 0.095961518 | PPP1CC     |
| ENSG00000236782 | 9.602911072 | 2.089639274 | 2.181488674  | 0.046455837 | 0.096042638 | AL391650.1 |
| ENSG00000123009 | 3.591958154 | 12.39375595 | -1.78390612  | 0.046459485 | 0.096042638 | NME2P1     |
| ENSG00000162688 | 411.293929  | 257.9767334 | 0.671899519  | 0.046496337 | 0.096111174 | AGL        |
| ENSG00000251455 | 14.81827881 | 2.802717299 | 2.393323013  | 0.046510525 | 0.096132852 | AC092611.1 |
| ENSG00000114023 | 595.6930547 | 1063.948348 | -0.836615038 | 0.046526269 | 0.096157417 | FAM162A    |
| ENSG00000213859 | 1235.53144  | 812.9238401 | 0.604371409  | 0.046530002 | 0.096157417 | KCTD11     |
| ENSG00000228925 | 6.908297814 | 21.34852533 | -1.626456305 | 0.046533513 | 0.096157417 | AC016722.2 |
| ENSG00000141867 | 1056.907081 | 1433.196697 | -0.439187422 | 0.046545733 | 0.096175018 | BRD4       |
| ENSG00000280721 | 5.174068246 | 18.57507695 | -1.840815773 | 0.04655362  | 0.096176523 | LINC01943  |
| ENSG00000266916 | 21.94982625 | 8.122432658 | 1.425381425  | 0.046554502 | 0.096176523 | ZNF793-AS1 |
| ENSG00000261839 | 4.571217846 | 0.356539013 | 3.563210907  | 0.046561011 | 0.096176523 | AL358933.1 |
| ENSG00000269313 | 29.07711455 | 13.56359007 | 1.110003627  | 0.046561268 | 0.096176523 | MAGIX      |
| ENSG00000237772 | 4.546002329 | 0.387220594 | 3.55632909   | 0.046565906 | 0.096178457 | LINC02631  |
| ENSG00000103363 | 2609.323845 | 4154.520671 | -0.671063735 | 0.046569916 | 0.096179093 | ELOB       |
| ENSG00000226108 | 4.175932552 | 0           | 4.397596126  | 0.046580493 | 0.09619329  | RAB28P1    |
| ENSG00000140522 | 8.232411766 | 0.774441189 | 3.46474954   | 0.046595638 | 0.096216919 | RLBP1      |
| ENSG00000082146 | 377.0519212 | 600.6615548 | -0.672289487 | 0.046616129 | 0.096251581 | STRADB     |
| ENSG00000175970 | 630.2692193 | 859.5122789 | -0.447731053 | 0.046643833 | 0.096301131 | UNC119B    |
| ENSG00000138100 | 10.33928968 | 1.426156051 | 2.852366314  | 0.046677514 | 0.09636301  | TRIM54     |
| ENSG00000277511 | 52.67312987 | 29.31857757 | 0.843745658  | 0.046704213 | 0.096410469 | AC116407.2 |
| ENSG00000256826 | 4.571217846 | 0.336469917 | 3.563214026  | 0.046719678 | 0.096434732 | ATP5MFP4   |
| ENSG00000163932 | 1013.39026  | 683.4530441 | 0.568723563  | 0.046786818 | 0.096565643 | PRKCD      |
| ENSG00000131100 | 2034.751602 | 2691.698841 | -0.403709814 | 0.046926587 | 0.096846426 | ATP6V1E1   |
| novel.719       | 52.86092133 | 101.0599169 | -0.935559812 | 0.046931057 | 0.096847957 | -          |
| ENSG00000090432 | 539.1787189 | 792.2053289 | -0.555553982 | 0.046963955 | 0.09690815  | MUL1       |
| ENSG00000170088 | 713.1579104 | 464.6237457 | 0.617501924  | 0.047082517 | 0.097145083 | TMEM192    |
| ENSG00000160703 | 302.8656486 | 432.6006477 | -0.514496464 | 0.047093427 | 0.09714621  | NLRX1      |
| ENSG00000234917 | 8.393449325 | 1.436768536 | 2.548537257  | 0.047096133 | 0.09714621  | AC098484.2 |
| ENSG00000101825 | 411.0999927 | 112.7794956 | 1.865161921  | 0.04709653  | 0.09714621  | MXRA5      |
| ENSG00000100890 | 88.45488027 | 142.0789375 | -0.683394425 | 0.04709802  | 0.09714621  | KIAA0391   |

|                 |             |             |              |             |             |            |
|-----------------|-------------|-------------|--------------|-------------|-------------|------------|
| ENSG00000188167 | 16.55662533 | 34.36318617 | -1.05204685  | 0.047104072 | 0.09715098  | TMPPE      |
| ENSG00000172239 | 1169.070233 | 1574.787615 | -0.429886318 | 0.047132687 | 0.097202281 | PAIP1      |
| ENSG00000150907 | 1085.149021 | 536.4384387 | 1.015991154  | 0.047166971 | 0.097265265 | FOXO1      |
| ENSG00000251675 | 3.605819561 | 0           | 4.185221737  | 0.047212747 | 0.097351936 | AC010260.1 |
| ENSG00000155324 | 671.282436  | 389.9977904 | 0.782926682  | 0.047230669 | 0.097381162 | GRAMD2B    |
| ENSG00000156486 | 34.96653411 | 10.84243343 | 1.690048954  | 0.047254757 | 0.097423094 | KCNS2      |
| ENSG00000115425 | 155.5011421 | 252.3227787 | -0.699627906 | 0.047262272 | 0.097427081 | PECR       |
| ENSG00000107521 | 1296.089022 | 956.3670007 | 0.438456541  | 0.04726419  | 0.097427081 | HPS1       |
| ENSG00000210144 | 399.4717114 | 187.8840618 | 1.089408978  | 0.047278259 | 0.09744835  | MT-TY      |
| ENSG00000134954 | 1885.120408 | 3201.274348 | -0.763897785 | 0.047307717 | 0.097501331 | ETS1       |
| ENSG00000185728 | 1102.939496 | 1437.854295 | -0.382492512 | 0.047324504 | 0.097528193 | YTHDF3     |
| ENSG00000286320 | 6.654133891 | 1.10029862  | 2.614531563  | 0.047343095 | 0.097558768 | AC108053.1 |
| ENSG00000264083 | 4.79139071  | 0.387220594 | 3.634344767  | 0.047386575 | 0.097640623 | AC005899.1 |
| ENSG00000100023 | 576.7011684 | 850.214841  | -0.559886318 | 0.047413225 | 0.097687788 | PPIL2      |
| ENSG00000173153 | 634.2132258 | 894.1132596 | -0.495457774 | 0.047431941 | 0.097718599 | ESRRA      |
| ENSG00000183840 | 4.204909015 | 13.86822253 | -1.7136545   | 0.047447519 | 0.097736603 | GPR39      |
| ENSG00000164176 | 3099.797954 | 800.4489708 | 1.95316591   | 0.047451946 | 0.097736603 | EDIL3      |
| ENSG00000173928 | 60.29635172 | 35.1105418  | 0.775554848  | 0.047454566 | 0.097736603 | SWSAP1     |
| ENSG00000101654 | 678.0947021 | 1131.51754  | -0.738423375 | 0.047455727 | 0.097736603 | RNMT       |
| ENSG00000279168 | 8.534499426 | 1.456837632 | 2.559022222  | 0.047463306 | 0.097744463 | AC105052.4 |
| ENSG00000138600 | 1390.097272 | 1011.825134 | 0.457946691  | 0.047472134 | 0.097754895 | SPPL2A     |
| ENSG00000217130 | 34.79991249 | 58.30415284 | -0.745242475 | 0.04752509  | 0.097856187 | AL139100.1 |
| ENSG00000227473 | 19.39479598 | 35.73974742 | -0.883681158 | 0.047530595 | 0.097859767 | TSSK5P     |
| ENSG00000217241 | 7.002820368 | 17.84565425 | -1.353922492 | 0.047545326 | 0.097878754 | CBX3P9     |
| ENSG00000139988 | 9.086990062 | 1.762625967 | 2.352727578  | 0.047547352 | 0.097878754 | RDH12      |
| ENSG00000233355 | 4.593854795 | 0           | 4.53230792   | 0.047551215 | 0.097878952 | CHRM3-AS2  |
| ENSG00000172350 | 7.638408178 | 20.79818343 | -1.445305006 | 0.047559435 | 0.097888115 | ABCG4      |
| ENSG0000023041  | 851.7810087 | 631.0593219 | 0.432584971  | 0.047579554 | 0.097921768 | ZDHHC6     |
| ENSG00000178343 | 121.919025  | 29.76972986 | 2.032096268  | 0.047612023 | 0.097980829 | SHISA3     |
| ENSG00000176715 | 467.5280471 | 631.7738941 | -0.434060557 | 0.047624089 | 0.097997898 | ACSF3      |
| ENSG00000170846 | 403.3131739 | 287.1937287 | 0.489513887  | 0.047685197 | 0.098115871 | AC093323.1 |
| ENSG00000148019 | 394.8465422 | 617.5453735 | -0.645758453 | 0.047700961 | 0.098133539 | CEP78      |
| ENSG00000168702 | 28.33238733 | 3.974991568 | 2.834785565  | 0.047704878 | 0.098133539 | LRP1B      |
| ENSG00000244398 | 1367.437318 | 1966.939059 | -0.524501765 | 0.047705115 | 0.098133539 | AC116533.1 |
| ENSG00000211778 | 6.466698437 | 0           | 5.025844639  | 0.047832688 | 0.098388178 | TRAV4      |
| ENSG00000188659 | 23.95097004 | 8.35740122  | 1.506445059  | 0.047873796 | 0.098458364 | SAXO2      |
| ENSG00000173040 | 154.9216841 | 245.0461081 | -0.660304277 | 0.04787439  | 0.098458364 | EVC2       |
| ENSG00000234880 | 0           | 5.564140531 | -5.059753527 | 0.047881319 | 0.098461152 | LINC00163  |
| ENSG00000114520 | 660.2769585 | 460.059126  | 0.520541607  | 0.047883325 | 0.098461152 | SNX4       |
| ENSG00000172292 | 172.1560509 | 291.2044443 | -0.75921031  | 0.047890413 | 0.098467935 | CERS6      |
| ENSG00000150281 | 271.094791  | 157.1353938 | 0.788662605  | 0.047925001 | 0.098527176 | CTF1       |
| ENSG00000267152 | 13.3573739  | 4.280779903 | 1.637556569  | 0.04792681  | 0.098527176 | AC093227.1 |
| ENSG00000212493 | 1.50778846  | 8.74449342  | -2.530499742 | 0.048002962 | 0.09867592  | SNORD19    |
| ENSG00000151500 | 717.1411631 | 515.9460658 | 0.475003893  | 0.048014095 | 0.098690997 | THYN1      |
| ENSG00000231943 | 3.663772488 | 0           | 4.205824865  | 0.048127726 | 0.098908912 | PGM5P4-AS1 |
| ENSG00000279994 | 3.663772488 | 0           | 4.205824865  | 0.048127726 | 0.098908912 | AC017037.4 |
| ENSG00000095066 | 193.5408938 | 313.3178264 | -0.694138322 | 0.048146151 | 0.0989306   | HOOK2      |
| ENSG00000152291 | 3908.897041 | 5655.585761 | -0.532893016 | 0.048147913 | 0.0989306   | TGOLN2     |
| ENSG00000134597 | 368.4520179 | 479.5288835 | -0.380029807 | 0.048149703 | 0.0989306   | RBMX2      |
| ENSG00000163683 | 1268.563925 | 855.9756913 | 0.567514107  | 0.04816237  | 0.0989488   | SMIM14     |
| ENSG00000072840 | 806.2152357 | 1811.79346  | -1.16808066  | 0.048203666 | 0.099019116 | EVC        |



|                 |             |             |              |             |             |            |
|-----------------|-------------|-------------|--------------|-------------|-------------|------------|
| ENSG00000186714 | 6.683110355 | 1.10029862  | 2.619628014  | 0.048204218 | 0.099019116 | CCDC73     |
| ENSG00000267466 | 4.29810665  | 0           | 4.435906271  | 0.048212179 | 0.099019812 | AC021683.1 |
| ENSG00000272866 | 4.29810665  | 0           | 4.435906271  | 0.048212179 | 0.099019812 | AL135786.2 |
| ENSG00000198917 | 15.81795288 | 5.63611618  | 1.476651228  | 0.048268287 | 0.099127212 | SPOUT1     |
| ENSG00000135577 | 10.2234551  | 2.180528143 | 2.238050623  | 0.048314548 | 0.099214375 | NMBR       |
| ENSG00000107164 | 1389.898838 | 1802.934818 | -0.375215079 | 0.048320879 | 0.099219534 | FUBP3      |
| ENSG00000126746 | 280.1115047 | 391.7719964 | -0.48388687  | 0.048348522 | 0.099268449 | ZNF384     |
| ENSG00000249568 | 4.289331108 | 0           | 4.433187228  | 0.048354546 | 0.099272973 | AC104793.1 |
| ENSG00000145730 | 1898.639914 | 4598.592844 | -1.276233909 | 0.048448193 | 0.099457372 | PAM        |
| ENSG00000142973 | 41.59795943 | 0           | 7.711994204  | 0.048492024 | 0.099539485 | CYP4B1     |
| ENSG00000155463 | 1636.166998 | 2170.024439 | -0.407374634 | 0.048539416 | 0.099628897 | OXA1L      |
| ENSG00000173113 | 2103.130769 | 2728.300486 | -0.375423906 | 0.048561012 | 0.099665349 | TRMT112    |
| ENSG00000284642 | 21.18544009 | 5.932447905 | 1.827397764  | 0.048623404 | 0.099785517 | AL139424.2 |
| ENSG00000225526 | 15.76222252 | 3.586615098 | 2.137128626  | 0.048663259 | 0.099859422 | MKRN2OS    |
| ENSG00000134247 | 479.4316048 | 1365.072762 | -1.509680098 | 0.04867073  | 0.099866864 | PTGFRN     |
| ENSG00000140092 | 2948.240775 | 1591.304136 | 0.889513051  | 0.048784932 | 0.100091342 | FBLN5      |
| ENSG00000125551 | 6.3546248   | 0.743759607 | 3.125239171  | 0.048787835 | 0.100091342 | PLGLB2     |
| ENSG00000223345 | 3.926783224 | 12.97452264 | -1.721794747 | 0.048831153 | 0.100160093 | HIST2H2BA  |
| ENSG00000144290 | 6.778815287 | 0           | 5.093894226  | 0.048832912 | 0.100160093 | SLC4A10    |
| ENSG00000228035 | 6.778815287 | 0           | 5.093894226  | 0.048832912 | 0.100160093 | NGF-AS1    |
| ENSG00000167077 | 27.94817141 | 78.54184861 | -1.489058417 | 0.048869002 | 0.100226204 | MEI1       |
| ENSG00000158014 | 3.622188266 | 0           | 4.191040922  | 0.048879524 | 0.10023987  | SLC30A2    |
| ENSG00000226525 | 58.25878084 | 88.43846566 | -0.603543747 | 0.048888555 | 0.100250477 | RPS7P10    |
| novel.770       | 96.58474939 | 164.144732  | -0.763286364 | 0.048897137 | 0.100260161 | -          |
| ENSG00000239494 | 10.85270339 | 2.904218654 | 1.910238013  | 0.048938486 | 0.100337027 | RN7SL333P  |
| ENSG00000249092 | 3.61842732  | 0           | 4.189705088  | 0.04894835  | 0.100344674 | PPIAP77    |
| ENSG00000236819 | 7.398034391 | 0           | 5.220100371  | 0.04894994  | 0.100344674 | LINC01563  |
| ENSG00000177197 | 4.554849141 | 0.387220594 | 3.558773134  | 0.048957533 | 0.10035232  | PCNPP5     |
| ENSG00000236255 | 80.52935729 | 43.29981303 | 0.900313135  | 0.049004412 | 0.100440489 | AC009404.1 |
| ENSG00000276830 | 13.80155184 | 3.862877727 | 1.826715085  | 0.049011771 | 0.100443722 | MIR6730    |
| ENSG00000276071 | 9.669710811 | 2.476859868 | 1.955633014  | 0.049013722 | 0.100443722 | AC074138.1 |
| ENSG00000213763 | 5.981976454 | 18.40763611 | -1.619247141 | 0.049025604 | 0.100460148 | ACTBP2     |
| ENSG00000164736 | 82.88971495 | 35.89931989 | 1.202265806  | 0.049058965 | 0.100520582 | SOX17      |
| ENSG00000178409 | 51.52502599 | 89.80929471 | -0.802237554 | 0.049105865 | 0.100608744 | BEND3      |
| ENSG00000131096 | 1.188078446 | 7.532080959 | -2.651517403 | 0.049140082 | 0.10067091  | PYY        |
| ENSG00000184305 | 4.574978792 | 0.336469917 | 3.564283739  | 0.049148354 | 0.100679917 | CCSER1     |
| ENSG00000123572 | 44.1554977  | 126.4418429 | -1.518594797 | 0.049182446 | 0.10074181  | NRK        |
| ENSG00000213411 | 3.66251884  | 0           | 4.205398112  | 0.049200649 | 0.100771153 | RBM22P2    |
| ENSG00000255529 | 711.44824   | 524.8391337 | 0.438429582  | 0.049218863 | 0.10080051  | POLR2M     |
| ENSG00000121741 | 1867.879078 | 1163.991663 | 0.682576285  | 0.049271066 | 0.100899469 | ZMYM2      |
| ENSG00000260360 | 10.25236029 | 2.51699806  | 2.028125892  | 0.049324736 | 0.101001416 | AL353708.1 |
| ENSG00000100403 | 2637.555282 | 3457.925897 | -0.390738741 | 0.049344115 | 0.101033135 | ZC3H7B     |
| ENSG00000165509 | 7.741421539 | 1.029478846 | 2.879628396  | 0.049365052 | 0.101061481 | MAGEC3     |
| ENSG00000280310 | 5.218159766 | 0.387220594 | 3.753506407  | 0.049370034 | 0.101061481 | AC092437.1 |
| ENSG00000201134 | 5.218159766 | 0.387220594 | 3.753506407  | 0.049370034 | 0.101061481 | RF00019    |
| ENSG00000266278 | 0.601596751 | 7.794135082 | -3.68768498  | 0.049373518 | 0.101061481 | LINC01910  |
| ENSG00000118260 | 912.3056529 | 682.0295031 | 0.419743629  | 0.049402    | 0.101111814 | CREB1      |
| ENSG00000177917 | 537.5662647 | 749.2975099 | -0.479266576 | 0.04950769  | 0.101320149 | ARL6IP6    |
| ENSG00000231793 | 11.49337707 | 3.61729668  | 1.673197294  | 0.049527204 | 0.101345751 | DOC2GP     |
| ENSG00000138459 | 911.4710613 | 634.8304585 | 0.521303542  | 0.049528001 | 0.101345751 | SLC35A5    |
| ENSG00000186369 | 0           | 5.503933243 | -5.044825196 | 0.049540737 | 0.101359343 | LINC00643  |

|                 |             |             |              |             |             |            |
|-----------------|-------------|-------------|--------------|-------------|-------------|------------|
| ENSG00000021461 | 4.50065716  | 0.387220594 | 3.543868721  | 0.049542446 | 0.101359343 | CYP3A43    |
| ENSG00000237522 | 11.16990611 | 3.627909165 | 1.631034321  | 0.04955628  | 0.101379662 | NONOP2     |
| ENSG00000253771 | 10.97369511 | 2.782648203 | 1.958036871  | 0.049563986 | 0.101387444 | TPTE2P1    |
| ENSG00000260729 | 20.75777339 | 3.097764754 | 2.768960505  | 0.049617219 | 0.101488345 | AC009690.1 |
| ENSG00000127481 | 2527.091359 | 4128.440854 | -0.708046214 | 0.049629442 | 0.101505355 | UBR4       |
| ENSG00000114125 | 919.6934996 | 1277.583932 | -0.474191785 | 0.049662875 | 0.101555492 | RNF7       |
| ENSG00000180347 | 3.637303322 | 0           | 4.196427929  | 0.049665682 | 0.101555492 | ITPRID1    |
| ENSG00000263846 | 3.637303322 | 0           | 4.196427929  | 0.049665682 | 0.101555492 | CIAPIN1P   |
| ENSG00000171960 | 213.0964701 | 302.9809389 | -0.508600592 | 0.049737065 | 0.101690626 | PPIH       |
| ENSG00000253389 | 3.632288727 | 0           | 4.194648991  | 0.049739597 | 0.101690626 | AC113133.1 |
| ENSG00000257283 | 3.368024343 | 13.59684019 | -2.023330422 | 0.049747294 | 0.101698358 | AC012464.1 |
| ENSG00000257242 | 6.379769046 | 1.080229524 | 2.564175138  | 0.049782046 | 0.101761396 | LINC01619  |
| ENSG00000239900 | 58.18159591 | 104.4876487 | -0.845891631 | 0.049823309 | 0.101837731 | ADSL       |
| ENSG00000169271 | 0           | 33.9907692  | -7.667895617 | 0.04984298  | 0.101869924 | HSPB3      |
| ENSG00000244733 | 39.01610434 | 16.5882233  | 1.242064924  | 0.049864107 | 0.101905087 | AL132656.2 |
| ENSG00000142627 | 1981.041124 | 1285.219033 | 0.624114295  | 0.049899513 | 0.101969424 | EPHA2      |
| ENSG00000224857 | 4.442704233 | 0           | 4.487405802  | 0.049928905 | 0.102021462 | LINC01691  |
| ENSG00000279803 | 8.617383136 | 1.130980201 | 2.964999024  | 0.049944133 | 0.102044552 | AC009090.5 |
| ENSG00000271795 | 11.66444382 | 2.822786395 | 2.03870726   | 0.04995633  | 0.102061446 | AC011337.1 |
| ENSG00000277050 | 24.4791428  | 8.314822883 | 1.562146408  | 0.050003959 | 0.102150625 | AL122125.1 |
| ENSG00000163565 | 2326.922933 | 3181.837835 | -0.451410098 | 0.050007844 | 0.102150625 | IFI16      |
| ENSG00000165264 | 726.0472005 | 1025.91943  | -0.498965268 | 0.050034217 | 0.102196461 | NDUFB6     |
| ENSG00000176920 | 16.0154888  | 39.14890431 | -1.285187161 | 0.050068721 | 0.102257955 | FUT2       |
| ENSG00000197822 | 9.224350487 | 0.693008929 | 3.709194807  | 0.050072195 | 0.102257955 | OCLN       |
| ENSG00000115616 | 3.975889338 | 0           | 4.32375509   | 0.050096563 | 0.102291637 | SLC9A2     |
| ENSG00000163534 | 3.975889338 | 0           | 4.32375509   | 0.050096563 | 0.102291637 | FCRL1      |
| ENSG00000177410 | 423.0916872 | 590.8042587 | -0.481848728 | 0.050108276 | 0.10230701  | ZFAS1      |
| ENSG00000186377 | 103.7108821 | 16.37131606 | 2.659508863  | 0.050111967 | 0.10230701  | CYP4X1     |
| ENSG00000160908 | 453.1033017 | 329.3452706 | 0.460286884  | 0.050123603 | 0.102322726 | ZNF394     |
| ENSG00000281969 | 14.69757182 | 3.280826763 | 2.171516675  | 0.050140726 | 0.102349639 | AL592158.1 |
| ENSG00000167323 | 1177.407098 | 758.9596719 | 0.633362057  | 0.050145855 | 0.102352066 | STIM1      |
| ENSG00000272941 | 14.82991765 | 5.166179057 | 1.537678015  | 0.050163616 | 0.102372471 | AC083862.2 |
| ENSG00000160271 | 288.5594033 | 151.3706436 | 0.932377026  | 0.05016376  | 0.102372471 | RALGDS     |
| ENSG00000275191 | 0.61420451  | 6.258305336 | -3.36528205  | 0.050168036 | 0.102372471 | AC007497.1 |
| ENSG00000285790 | 8.01599848  | 0           | 5.335933311  | 0.050171613 | 0.102372471 | AC021517.2 |
| ENSG00000111144 | 866.7734982 | 1336.01361  | -0.624255054 | 0.050179134 | 0.102379777 | LTA4H      |
| ENSG00000255858 | 3.60707321  | 0           | 4.185626872  | 0.050213824 | 0.102442509 | AC055720.1 |
| ENSG00000261037 | 3.967113797 | 0           | 4.320849094  | 0.050253176 | 0.102498263 | AC010266.2 |
| ENSG00000254338 | 3.604565913 | 0           | 4.184732488  | 0.05026131  | 0.102498263 | MAFA-AS1   |
| ENSG00000169194 | 3.604565913 | 0           | 4.184732488  | 0.05026131  | 0.102498263 | IL13       |
| ENSG00000164270 | 3.604565913 | 0           | 4.184732488  | 0.05026131  | 0.102498263 | HTR4       |
| ENSG00000222872 | 3.604565913 | 0           | 4.184732488  | 0.05026131  | 0.102498263 | RNU4-78P   |
| ENSG00000121903 | 73.30607933 | 116.7510539 | -0.67008824  | 0.050264823 | 0.102498263 | ZSCAN20    |
| ENSG00000006576 | 401.9327163 | 593.975026  | -0.564049291 | 0.050280075 | 0.102521318 | PHTF2      |
| ENSG00000235065 | 16.6397225  | 35.4136332  | -1.085753668 | 0.050308269 | 0.102570755 | RPL24P2    |
| ENSG00000145414 | 133.8313082 | 208.28335   | -0.638857791 | 0.05033218  | 0.102601248 | NAF1       |
| ENSG00000278668 | 5.450940389 | 0.723690511 | 2.921339105  | 0.050333822 | 0.102601248 | AC005899.7 |
| ENSG00000176732 | 25.31129762 | 10.90508086 | 1.206313439  | 0.050335072 | 0.102601248 | PFN4       |
| ENSG00000277775 | 0           | 3.271370153 | -4.288653414 | 0.050341638 | 0.102606582 | HIST1H3F   |
| ENSG00000170122 | 9.79063126  | 1.834601616 | 2.428816448  | 0.050358479 | 0.102632855 | FOXD4      |
| ENSG00000189283 | 56.51946541 | 30.11527121 | 0.911237215  | 0.050381839 | 0.10267241  | FHIT       |

|                 |             |             |              |             |             |            |
|-----------------|-------------|-------------|--------------|-------------|-------------|------------|
| ENSG00000136110 | 7.381736958 | 0.356539013 | 4.254789599  | 0.050396241 | 0.102693705 | CNMD       |
| ENSG00000227188 | 5.111100724 | 0.356539013 | 3.726619602  | 0.050422721 | 0.102739605 | MGAT3-AS1  |
| ENSG00000224416 | 4.164578442 | 0           | 4.3939043    | 0.050453109 | 0.102793462 | IFNA22P    |
| ENSG00000107960 | 280.7139122 | 473.1277483 | -0.753667237 | 0.050464708 | 0.102804044 | STN1       |
| ENSG00000104946 | 1248.692334 | 746.2023358 | 0.743207504  | 0.050466217 | 0.102804044 | TBC1D17    |
| ENSG00000062598 | 1203.489864 | 877.5360939 | 0.455597095  | 0.050485619 | 0.102835505 | ELMO2      |
| ENSG00000205209 | 11.09558448 | 2.435565801 | 2.170197032  | 0.050494762 | 0.102841865 | SCGB2B2    |
| ENSG00000222267 | 4.162071144 | 0           | 4.393108626  | 0.050496658 | 0.102841865 | RNU6-892P  |
| ENSG00000129636 | 897.6409871 | 1245.561217 | -0.472752395 | 0.050517846 | 0.102876952 | ITFG1      |
| ENSG00000181031 | 39.76989149 | 10.6901814  | 1.893722463  | 0.050534531 | 0.102902864 | RPH3AL     |
| ENSG00000113141 | 1780.201557 | 2272.067437 | -0.352053188 | 0.050544353 | 0.102914799 | IK         |
| ENSG00000277459 | 8.311819264 | 31.46012339 | -1.92410021  | 0.050568893 | 0.102956698 | AP001527.2 |
| ENSG00000072756 | 321.1292514 | 432.9429779 | -0.431492792 | 0.050575299 | 0.10296167  | TRNT1      |
| ENSG00000276718 | 10.82881279 | 3.240688571 | 1.744517996  | 0.050613929 | 0.103032242 | AC005840.5 |
| ENSG00000075856 | 805.62525   | 1067.343942 | -0.405959722 | 0.050643347 | 0.103084048 | SART3      |
| ENSG00000254088 | 5.701343365 | 0.743759607 | 2.972711072  | 0.050667856 | 0.103125856 | SLC2A3P4   |
| ENSG00000198331 | 91.68679818 | 162.2938798 | -0.825076374 | 0.05067528  | 0.103132889 | HYLS1      |
| ENSG00000235351 | 11.98916843 | 3.200550379 | 1.902174489  | 0.050696069 | 0.103167116 | AC114730.3 |
| ENSG00000213204 | 20.4027474  | 7.85793839  | 1.37618745   | 0.050724287 | 0.103216455 | AL049697.1 |
| ENSG00000158715 | 50.67212827 | 108.7946966 | -1.102360974 | 0.050736706 | 0.103233641 | SLC45A3    |
| ENSG00000268201 | 3.608326859 | 12.71845751 | -1.817756804 | 0.050868088 | 0.103492857 | AC020915.2 |
| ENSG00000249494 | 7.622039473 | 1.386017859 | 2.43022205   | 0.050930096 | 0.103610901 | AC008629.1 |
| ENSG00000221983 | 5828.760968 | 8268.270777 | -0.504401316 | 0.050965499 | 0.103674807 | UBA52      |
| ENSG00000134470 | 95.93002832 | 46.8773567  | 1.031958109  | 0.050985573 | 0.103707521 | IL15RA     |
| ENSG00000144821 | 4.189793959 | 13.65576321 | -1.698422163 | 0.050994665 | 0.103717896 | MYH15      |
| ENSG00000100490 | 44.916522   | 22.99073673 | 0.960338228  | 0.051003199 | 0.103727131 | CDKL1      |
| ENSG00000253141 | 0.308355904 | 6.367979032 | -4.286180634 | 0.05102758  | 0.103768594 | AC008632.1 |
| ENSG00000079257 | 196.5462542 | 511.3851955 | -1.379935901 | 0.051032997 | 0.103771488 | LXN        |
| ENSG00000134014 | 497.002982  | 644.1780867 | -0.374461432 | 0.051050788 | 0.103794004 | ELP3       |
| ENSG00000176222 | 65.33313081 | 98.12612538 | -0.585246617 | 0.05105206  | 0.103794004 | ZNF404     |
| ENSG00000198034 | 12168.8182  | 18823.06483 | -0.629313017 | 0.051064875 | 0.103811933 | RPS4X      |
| ENSG00000136630 | 114.311973  | 63.44350312 | 0.846318014  | 0.051079515 | 0.103829045 | HLX        |
| ENSG00000267288 | 22.68946761 | 7.887464097 | 1.525911554  | 0.051081285 | 0.103829045 | AC138150.2 |
| ENSG00000167985 | 203.4542683 | 290.7521024 | -0.515633492 | 0.051106805 | 0.103872793 | SDHAF2     |
| ENSG00000256424 | 3.916682763 | 0           | 4.303974265  | 0.051118199 | 0.103887823 | LINC02414  |
| ENSG00000175931 | 643.7564481 | 959.83613   | -0.57588357  | 0.051138126 | 0.103920191 | UBE2O      |
| ENSG00000262480 | 0           | 3.53586442  | -4.405748032 | 0.051179496 | 0.103996127 | SAMD11P1   |
| ENSG00000046647 | 485.5403065 | 274.5033714 | 0.823682265  | 0.051257938 | 0.104147374 | GEMIN8     |
| ENSG00000270179 | 23.96852112 | 10.41391877 | 1.202158861  | 0.051296182 | 0.10421693  | AP002840.2 |
| ENSG00000133028 | 578.032006  | 860.8487276 | -0.574928808 | 0.05131422  | 0.104245426 | SCO1       |
| ENSG00000149196 | 573.5992444 | 790.3235601 | -0.462568032 | 0.051325828 | 0.104260855 | HIKESHI    |
| ENSG00000211660 | 6.154581587 | 0           | 4.954473422  | 0.051345107 | 0.104291864 | IGLV2-23   |
| ENSG00000175220 | 1488.544603 | 2145.819971 | -0.527687866 | 0.05136662  | 0.104327405 | ARHGAP1    |
| ENSG00000117242 | 61.30172457 | 105.840626  | -0.788848709 | 0.051439716 | 0.104467699 | PINK1-AS   |
| ENSG00000285836 | 9.538689901 | 1.447381022 | 2.727964768  | 0.051446255 | 0.104472811 | AC092896.2 |
| ENSG00000147432 | 41.2707988  | 0.774441189 | 5.757704059  | 0.051458287 | 0.104489079 | CHRN3      |
| ENSG00000233968 | 4.917325754 | 0           | 4.630358757  | 0.051462565 | 0.104489599 | AL157895.1 |
| ENSG00000260484 | 3.931797819 | 0           | 4.309043852  | 0.051469961 | 0.104496449 | AC131902.1 |
| ENSG00000185621 | 146.2007181 | 225.0904883 | -0.621837457 | 0.051488782 | 0.104526492 | LMLN       |
| ENSG00000179899 | 80.2216143  | 44.75819172 | 0.842193917  | 0.0514987   | 0.104538457 | PHC1P1     |
| ENSG00000183908 | 6.153327938 | 0           | 4.954192721  | 0.051525786 | 0.104577099 | LRRC55     |

|                 |             |             |              |             |             |            |
|-----------------|-------------|-------------|--------------|-------------|-------------|------------|
| ENSG00000227947 | 6.153327938 | 0           | 4.954192721  | 0.051525786 | 0.104577099 | LINC01738  |
| ENSG00000137831 | 4255.66037  | 2045.754183 | 1.056660388  | 0.051561535 | 0.10463014  | UACA       |
| ENSG00000090376 | 660.1954306 | 1318.20782  | -0.997404642 | 0.05156229  | 0.10463014  | IRAK3      |
| ENSG00000212766 | 7.033050481 | 1.029478846 | 2.734477718  | 0.051564001 | 0.10463014  | EWSAT1     |
| ENSG00000162972 | 196.5196439 | 279.6226655 | -0.509282265 | 0.051647732 | 0.104791857 | MAIP1      |
| ENSG00000276850 | 0           | 3.210006989 | -4.264979362 | 0.051715469 | 0.104912907 | AC245041.2 |
| ENSG00000230309 | 0           | 3.210006989 | -4.264979362 | 0.051715469 | 0.104912907 | AL121718.1 |
| ENSG00000223638 | 6.399898697 | 0           | 5.011421635  | 0.051751171 | 0.104977138 | RFPL4A     |
| ENSG00000154723 | 1161.893909 | 1590.612455 | -0.453194714 | 0.051765492 | 0.104992307 | ATP5PF     |
| ENSG00000162636 | 533.2884292 | 356.8498292 | 0.579038792  | 0.051766732 | 0.104992307 | FAM102B    |
| ENSG00000258137 | 0           | 3.760092102 | -4.485413039 | 0.051801662 | 0.105047025 | AC079313.2 |
| ENSG00000275882 | 41.25747938 | 84.71154247 | -1.038597205 | 0.051801797 | 0.105047025 | IKBKG1     |
| ENSG00000136444 | 868.3530899 | 637.3257999 | 0.446386426  | 0.051866291 | 0.105169602 | RSAD1      |
| ENSG00000162670 | 7.989673224 | 0.336469917 | 4.369190716  | 0.051908459 | 0.105246891 | BRINP3     |
| ENSG00000184368 | 3.648657432 | 11.33359552 | -1.641864006 | 0.051916231 | 0.105249393 | MAP7D2     |
| ENSG00000087095 | 523.6109841 | 360.9741663 | 0.536347459  | 0.051917795 | 0.105249393 | NLK        |
| ENSG00000137868 | 70.19579352 | 264.8997722 | -1.916586686 | 0.051935885 | 0.105277852 | STRA6      |
| ENSG00000181090 | 922.7820335 | 1240.077786 | -0.426288309 | 0.051968212 | 0.105335162 | EHMT1      |
| ENSG00000091583 | 0           | 5.685582588 | -5.084771497 | 0.051991333 | 0.105373807 | APOH       |
| ENSG00000268744 | 6.362146692 | 1.029478846 | 2.58853836   | 0.052001463 | 0.105380526 | AC008758.4 |
| ENSG00000146453 | 6.379840317 | 0           | 5.007063652  | 0.052002761 | 0.105380526 | PNLDC1     |
| ENSG00000262179 | 6.152074289 | 0           | 4.953914991  | 0.052045045 | 0.105457988 | MYMX       |
| ENSG00000172071 | 432.2285392 | 321.8425398 | 0.425717296  | 0.052050202 | 0.105460211 | EIF2AK3    |
| ENSG00000065320 | 441.9452845 | 94.40162951 | 2.227657504  | 0.052106453 | 0.105565951 | NTN1       |
| ENSG00000253972 | 3.896553111 | 0           | 4.297196198  | 0.052127364 | 0.105600081 | MAL2-AS1   |
| ENSG00000181240 | 9.396670886 | 1.436768536 | 2.709428797  | 0.052151161 | 0.105640053 | SLC25A41   |
| ENSG00000240750 | 0           | 3.189937893 | -4.257032186 | 0.052179412 | 0.10568904  | RN7SL559P  |
| ENSG00000141965 | 72.99389121 | 40.80917702 | 0.836416248  | 0.052214324 | 0.105751509 | FEM1A      |
| ENSG00000159792 | 700.8386457 | 963.0672117 | -0.458571084 | 0.052225885 | 0.105766679 | PSKH1      |
| ENSG00000169064 | 4.586332902 | 0.336469917 | 3.567478975  | 0.052244157 | 0.105795435 | ZBBX       |
| novel.475       | 428.4202702 | 156.8806945 | 1.450396783  | 0.052279785 | 0.105855957 | -          |
| ENSG00000102897 | 324.9618681 | 475.4681057 | -0.549753851 | 0.052282192 | 0.105855957 | LYRM1      |
| ENSG00000051009 | 875.6341809 | 584.4550514 | 0.583473129  | 0.052303618 | 0.105891086 | FAM160A2   |
| ENSG00000266907 | 9.118473823 | 2.51699806  | 1.857229204  | 0.052334528 | 0.105945409 | AC006116.1 |
| ENSG00000226121 | 50.7374609  | 82.73867457 | -0.706873301 | 0.052351999 | 0.105972519 | AC009487.2 |
| ENSG00000146063 | 1259.01639  | 948.7304515 | 0.408179791  | 0.052373975 | 0.106008744 | TRIM41     |
| ENSG00000287145 | 3.988497097 | 0           | 4.327987897  | 0.052381662 | 0.106016045 | AC009413.2 |
| ENSG00000175497 | 6.760010555 | 0           | 5.090049864  | 0.05239132  | 0.106027331 | DPP10      |
| ENSG00000099999 | 399.5135949 | 578.6508996 | -0.534034273 | 0.052442084 | 0.1061218   | RNF215     |
| ENSG00000222057 | 3.666279786 | 0           | 4.206775402  | 0.052467113 | 0.106155911 | RNU4-62P   |
| ENSG00000234350 | 3.666279786 | 0           | 4.206775402  | 0.052467113 | 0.106155911 | AC007405.1 |
| ENSG00000184887 | 1103.377491 | 788.7118204 | 0.484201903  | 0.052531254 | 0.106277411 | BTBD6      |
| novel.150       | 0.308355904 | 4.035198856 | -3.626925187 | 0.052559995 | 0.106327278 | -          |
| ENSG00000089225 | 0.601596751 | 5.851015645 | -3.284727981 | 0.052567827 | 0.106334842 | TBX5       |
| ENSG00000005436 | 393.8445899 | 247.4222498 | 0.66962485   | 0.052591373 | 0.10637419  | GCFC2      |
| ENSG00000131584 | 1225.694666 | 1636.193094 | -0.416764186 | 0.052695427 | 0.106576358 | ACAP3      |
| ENSG00000236581 | 61.94000566 | 18.00749128 | 1.780714807  | 0.052735228 | 0.106648553 | STARD13-AS |
| ENSG00000196811 | 1.833766717 | 8.213321528 | -2.170822989 | 0.052758522 | 0.106687356 | CHRNA      |
| ENSG00000197162 | 243.3276008 | 179.2310649 | 0.4402205    | 0.052788756 | 0.106740188 | ZNF785     |
| ENSG00000271474 | 7.982008789 | 0.713078025 | 3.477326104  | 0.0527989   | 0.106752391 | AC106881.1 |
| ENSG00000255031 | 37.80377929 | 72.06714961 | -0.927782403 | 0.052836725 | 0.106820555 | AP002807.1 |

|                 |             |             |              |             |             |             |
|-----------------|-------------|-------------|--------------|-------------|-------------|-------------|
| ENSG00000285722 | 7.089678488 | 0           | 5.15865646   | 0.052851025 | 0.106831912 | AC207130.1  |
| ENSG00000223875 | 7.089678488 | 0           | 5.15865646   | 0.052851025 | 0.106831912 | NBEAP3      |
| ENSG00000125124 | 2033.481192 | 1172.232712 | 0.794897018  | 0.052861727 | 0.106831912 | BBS2        |
| ENSG00000269376 | 3.646150135 | 0           | 4.199607263  | 0.052866339 | 0.106831912 | AL356740.3  |
| ENSG00000187862 | 3.646150135 | 0           | 4.199607263  | 0.052866339 | 0.106831912 | TTC24       |
| ENSG00000115657 | 41.68808065 | 68.35323186 | -0.713354187 | 0.052867014 | 0.106831912 | ABCB6       |
| ENSG00000133943 | 662.6240948 | 416.3448191 | 0.671024948  | 0.052871986 | 0.106833651 | DGLUCY      |
| ENSG00000269894 | 11.47826201 | 3.199394504 | 1.836985041  | 0.052878837 | 0.106839184 | AC018809.1  |
| ENSG00000254206 | 50.74741917 | 22.50201478 | 1.168222137  | 0.052903235 | 0.106880167 | NPIPB11     |
| ENSG00000261141 | 7.050672834 | 0.713078025 | 3.297702576  | 0.052931444 | 0.106928843 | AC092718.5  |
| ENSG00000258484 | 15.84058983 | 59.19969776 | -1.90433983  | 0.052949348 | 0.106953158 | SPESP1      |
| ENSG00000128000 | 19.09779419 | 8.621767093 | 1.147628235  | 0.052951714 | 0.106953158 | ZNF780B     |
| ENSG00000106804 | 268.5926712 | 134.1006314 | 1.000943543  | 0.052972265 | 0.106986351 | C5          |
| ENSG00000179241 | 789.0344595 | 472.9442196 | 0.737917757  | 0.052982528 | 0.10699876  | LDLRAD3     |
| ENSG00000228340 | 162.8055241 | 38.40711813 | 2.081526486  | 0.053014829 | 0.107051164 | MIR646HG    |
| ENSG00000287085 | 6.878067702 | 1.080229524 | 2.675767301  | 0.053016717 | 0.107051164 | AC012066.2  |
| ENSG00000171236 | 9.77927715  | 2.149846562 | 2.182145267  | 0.053088871 | 0.107188526 | LRG1        |
| ENSG00000165506 | 237.3275747 | 315.2644604 | -0.409923685 | 0.053099563 | 0.107195556 | DNAAF2      |
| ENSG00000153786 | 1377.508713 | 1789.42754  | -0.377584282 | 0.053100605 | 0.107195556 | ZDHHC7      |
| ENSG00000164494 | 224.003935  | 326.0468149 | -0.542182327 | 0.053164058 | 0.10730209  | PDSS2       |
| ENSG00000235043 | 23.55937442 | 44.02864062 | -0.903853504 | 0.053164344 | 0.10730209  | TECRP1      |
| ENSG00000255872 | 3.946912875 | 0           | 4.314110714  | 0.053165767 | 0.10730209  | AL138752.2  |
| ENSG00000214078 | 1338.976389 | 1862.172065 | -0.475809692 | 0.053171115 | 0.107304546 | CPNE1       |
| ENSG00000225535 | 5.48242415  | 0.723690511 | 2.92812094   | 0.05318846  | 0.107331213 | LINC01393   |
| ENSG00000231341 | 0.307102255 | 4.473170127 | -3.773616218 | 0.053203228 | 0.107352678 | VDAC1P6     |
| ENSG00000179397 | 31.21895244 | 14.1031911  | 1.150843342  | 0.05327972  | 0.107498672 | CATSPERE    |
| ENSG00000173208 | 18.81340015 | 6.287831042 | 1.567916265  | 0.053307702 | 0.107546778 | ABCD2       |
| ENSG00000214198 | 20.05685296 | 8.194408307 | 1.28684602   | 0.053331364 | 0.107573431 | TTC41P      |
| ENSG00000286679 | 3.938137334 | 0           | 4.311180507  | 0.053333334 | 0.107573431 | AC073225.1  |
| ENSG00000254463 | 3.938137334 | 0           | 4.311180507  | 0.053333334 | 0.107573431 | PPIAP41     |
| ENSG00000114573 | 826.0598643 | 1073.078126 | -0.377656274 | 0.053343125 | 0.107584826 | ATP6V1A     |
| ENSG00000130921 | 339.4040223 | 444.9449372 | -0.39054055  | 0.053353299 | 0.107596994 | C12orf65    |
| ENSG00000137411 | 0.307102255 | 4.485066883 | -3.791799587 | 0.053395545 | 0.107668517 | VAR52       |
| ENSG00000281420 | 1.828752122 | 10.28276331 | -2.491114592 | 0.053397053 | 0.107668517 | AP001052.1  |
| ENSG00000259767 | 6.301686468 | 0.713078025 | 3.138430842  | 0.053402095 | 0.107670327 | AC022558.1  |
| ENSG00000185267 | 40.83608092 | 20.48435115 | 0.989375406  | 0.053433803 | 0.107725896 | CDNF        |
| ENSG00000198642 | 859.019414  | 1151.315517 | -0.422742955 | 0.053547419 | 0.107946578 | KLHL9       |
| ENSG00000179943 | 358.6301163 | 272.1402605 | 0.397912457  | 0.053566827 | 0.107977325 | FIZ1        |
| ENSG00000156671 | 1356.576982 | 895.8667073 | 0.598971664  | 0.053571649 | 0.107978667 | SAMD8       |
| ENSG00000196954 | 981.4708023 | 1450.744081 | -0.563512357 | 0.05358213  | 0.107991414 | CASP4       |
| ENSG00000287475 | 6.123097826 | 0.743759607 | 3.06947994   | 0.053602739 | 0.108024571 | AL844892.2  |
| ENSG00000196912 | 107.9985055 | 57.13401475 | 0.921248297  | 0.053619723 | 0.108050417 | ANKRD36B    |
| ENSG00000162639 | 151.6878996 | 84.68325385 | 0.838880776  | 0.053715643 | 0.108235312 | HENMT1      |
| ENSG00000208028 | 21.32649019 | 5.951232731 | 1.855106036  | 0.053766159 | 0.108320915 | MIR616      |
| ENSG00000120341 | 10.27256121 | 3.189937893 | 1.6787047    | 0.053766465 | 0.108320915 | SEC16B      |
| ENSG00000101421 | 2106.657138 | 2690.558636 | -0.352900962 | 0.053795437 | 0.108370881 | CHMP4B      |
| ENSG00000231131 | 12.94704482 | 1.782695063 | 2.856775501  | 0.053819594 | 0.108411139 | LNCAROD     |
| ENSG00000171861 | 204.1190464 | 290.2730938 | -0.50890749  | 0.05382687  | 0.10841739  | MRM3        |
| novel.559       | 10.97745606 | 3.260757667 | 1.755605611  | 0.053883231 | 0.108522498 | -           |
| ENSG00000280160 | 1.49643435  | 8.101079293 | -2.423869057 | 0.05389019  | 0.108528101 | AC135050.7  |
| ENSG00000255650 | 7.166293954 | 1.029478846 | 2.766997869  | 0.053907131 | 0.108553605 | FAM222A-AS1 |

|                 |             |             |              |             |             |            |
|-----------------|-------------|-------------|--------------|-------------|-------------|------------|
| ENSG00000159708 | 6.036168435 | 1.080229524 | 2.486115795  | 0.053911211 | 0.108553605 | LRRC36     |
| ENSG00000275223 | 1.233423615 | 8.580473026 | -2.809570848 | 0.053929691 | 0.108582401 | AL121906.2 |
| ENSG00000107669 | 564.6612967 | 388.7837897 | 0.537580698  | 0.053964676 | 0.10864442  | ATE1       |
| ENSG00000117751 | 777.980277  | 1007.231841 | -0.372817855 | 0.053980137 | 0.108667126 | PPP1R8     |
| ENSG00000113249 | 3.590704505 | 0           | 4.179685476  | 0.053991221 | 0.108672598 | HAVCR1     |
| ENSG00000261456 | 3.590704505 | 0           | 4.179685476  | 0.053991221 | 0.108672598 | TUBB8      |
| ENSG00000180764 | 9.974234497 | 24.62092297 | -1.301147207 | 0.054001889 | 0.108685652 | PIPSL      |
| ENSG00000246203 | 17.82404    | 7.429423729 | 1.254466436  | 0.054008662 | 0.108690863 | AL353807.3 |
| ENSG00000230082 | 40.12233926 | 21.9009222  | 0.874504061  | 0.054022448 | 0.108710187 | PRRT3-AS1  |
| ENSG00000100979 | 2932.356039 | 1276.008756 | 1.200438151  | 0.054030446 | 0.108717861 | PLTP       |
| ENSG00000121905 | 7.051926483 | 0.713078025 | 3.29799399   | 0.054058333 | 0.10876555  | HPCA       |
| ENSG00000174177 | 279.455246  | 428.6474075 | -0.617818085 | 0.054082929 | 0.108806611 | CTU2       |
| ENSG00000104979 | 1360.195351 | 1890.806226 | -0.47509904  | 0.05411306  | 0.108854894 | C19orf53   |
| ENSG00000133115 | 6.159596182 | 0           | 4.955629048  | 0.054115308 | 0.108854894 | STOML3     |
| ENSG00000106868 | 211.3474808 | 366.3410832 | -0.794285833 | 0.054154386 | 0.108925068 | SUSD1      |
| ENSG00000287362 | 11.11069953 | 1.682349583 | 2.689158726  | 0.054206726 | 0.109021903 | AC103563.9 |
| ENSG00000149823 | 1133.840489 | 1496.315722 | -0.400091381 | 0.054235628 | 0.109071588 | VPS51      |
| ENSG00000041880 | 509.8544634 | 361.7931936 | 0.494927886  | 0.054264241 | 0.109120685 | PARP3      |
| ENSG00000147378 | 4.288077459 | 0           | 4.432879494  | 0.054296399 | 0.109176901 | FATE1      |
| ENSG00000261409 | 6.393701724 | 0           | 5.010088735  | 0.054328129 | 0.109232249 | AL035425.3 |
| ENSG00000273557 | 3.88645265  | 0           | 4.293742002  | 0.054338402 | 0.109244449 | AC008781.3 |
| ENSG00000161791 | 2517.82264  | 1489.954148 | 0.757103438  | 0.054343377 | 0.109245998 | FMNL3      |
| ENSG00000270012 | 45.93045694 | 20.82783753 | 1.14191419   | 0.05438169  | 0.10931456  | AC232271.1 |
| ENSG00000179799 | 3.882691704 | 0           | 4.2924721    | 0.054412576 | 0.109368183 | OR7E22P    |
| ENSG00000243659 | 6.022307028 | 0.672939833 | 3.10672399   | 0.054573045 | 0.109676505 | FO393419.3 |
| ENSG00000070915 | 6.365907639 | 0.672939833 | 3.187663976  | 0.054574414 | 0.109676505 | SLC12A3    |
| ENSG00000047634 | 524.4894126 | 312.7743851 | 0.745344465  | 0.054581147 | 0.109681551 | SCML1      |
| ENSG00000160396 | 14.91684704 | 4.953719736 | 1.58159719   | 0.054586013 | 0.109682847 | HIPK4      |
| ENSG00000248476 | 19.72933632 | 6.460152171 | 1.612270581  | 0.054624477 | 0.109751646 | BACH1-IT1  |
| ENSG00000225216 | 18.56235644 | 2.272572888 | 3.04974264   | 0.05469473  | 0.1098843   | AC007362.1 |
| ENSG00000172366 | 377.364394  | 506.9710989 | -0.42580042  | 0.054700963 | 0.109888326 | MCRIP2     |
| ENSG00000180182 | 1410.21167  | 873.6871076 | 0.690795254  | 0.054741314 | 0.109960884 | MED14      |
| ENSG00000182107 | 62.3347768  | 16.94031439 | 1.874202531  | 0.054782861 | 0.110035833 | TMEM30B    |
| ENSG00000120756 | 6.125605123 | 17.4065271  | -1.514019128 | 0.054788536 | 0.110038726 | PLS1       |
| ENSG00000175376 | 318.6664929 | 447.079291  | -0.488112631 | 0.054896726 | 0.110247496 | EIF1AD     |
| ENSG00000133639 | 1961.174944 | 1234.142886 | 0.668336852  | 0.054924824 | 0.110295398 | BTG1       |
| ENSG00000173812 | 11086.33498 | 8656.585609 | 0.356914755  | 0.05493416  | 0.110302398 | EIF1       |
| ENSG00000141027 | 1381.671796 | 1850.901136 | -0.421909962 | 0.054936801 | 0.110302398 | NCOR1      |
| ENSG00000276517 | 24.49049691 | 8.458902575 | 1.528685178  | 0.055089049 | 0.110591997 | AL133243.3 |
| ENSG00000263934 | 19.41485436 | 4.391737868 | 2.150951823  | 0.055089551 | 0.110591997 | SNORD3A    |
| ENSG00000169019 | 287.029247  | 477.6065351 | -0.735296831 | 0.055127554 | 0.110652573 | COMMD8     |
| ENSG00000129009 | 7461.87269  | 691.6398355 | 3.431363407  | 0.055128244 | 0.110652573 | ISLR       |
| ENSG00000122008 | 553.796927  | 405.5943013 | 0.449483923  | 0.055147806 | 0.110683287 | POLK       |
| ENSG00000129946 | 382.5876512 | 131.3025251 | 1.543848386  | 0.055168144 | 0.110715553 | SHC2       |
| ENSG00000253785 | 21.34830077 | 42.39588584 | -0.993466385 | 0.055175999 | 0.110722764 | AC008429.2 |
| ENSG00000134590 | 2808.043589 | 3880.821927 | -0.466769406 | 0.055191162 | 0.110744639 | RTL8C      |
| ENSG00000096080 | 213.8764417 | 295.8145967 | -0.468553217 | 0.055269396 | 0.110893056 | MRPS18A    |
| ENSG00000229373 | 1.200686205 | 6.481377142 | -2.425115452 | 0.055312879 | 0.11097173  | LINC00452  |
| ENSG00000160551 | 2266.943878 | 1601.007314 | 0.501879483  | 0.055321133 | 0.11097972  | TAOK1      |
| ENSG00000225022 | 10.56830936 | 21.87024062 | -1.048181114 | 0.055376649 | 0.111082513 | UBE2D3P1   |
| ENSG00000157734 | 53.97851001 | 27.25961987 | 0.984401134  | 0.055405348 | 0.111131503 | SNX22      |

|                 |             |             |              |             |             |            |
|-----------------|-------------|-------------|--------------|-------------|-------------|------------|
| ENSG00000131668 | 1.789675198 | 16.66952717 | -3.211872709 | 0.055422102 | 0.111156525 | BARX1      |
| ENSG00000237672 | 19.54566181 | 7.000780673 | 1.494482166  | 0.055430118 | 0.111164021 | KRR1P1     |
| ENSG00000220267 | 0.308355904 | 4.208804254 | -3.697686032 | 0.055447166 | 0.111189628 | ACTBP8     |
| ENSG00000236491 | 4.233885479 | 0.336469917 | 3.454162722  | 0.05553216  | 0.111344024 | AC234771.4 |
| ENSG00000260086 | 19.50819454 | 7.602900733 | 1.362635139  | 0.05553273  | 0.111344024 | AC007611.1 |
| ENSG00000261078 | 5.961846803 | 0           | 4.910369308  | 0.055541402 | 0.111352818 | AC009118.1 |
| ENSG00000101966 | 964.8851415 | 1280.483594 | -0.408377627 | 0.055584556 | 0.111430736 | XIAP       |
| ENSG00000204922 | 172.449363  | 258.2462839 | -0.583556837 | 0.055665557 | 0.111581215 | UQCC3      |
| ENSG00000226278 | 141.6747025 | 32.4061622  | 2.125469057  | 0.055668835 | 0.111581215 | PSPHP1     |
| ENSG00000136206 | 10.79983633 | 25.04841015 | -1.210921494 | 0.055672502 | 0.111581215 | SPDYE1     |
| ENSG00000204524 | 188.436417  | 130.9071791 | 0.527244788  | 0.055678385 | 0.111584396 | ZNF805     |
| ENSG00000261215 | 11.18759973 | 2.904218654 | 1.952768747  | 0.055686351 | 0.111591753 | AL162231.4 |
| ENSG00000137038 | 661.6597649 | 975.6656526 | -0.560601908 | 0.055729705 | 0.111670018 | DMAC1      |
| ENSG00000272767 | 7.306090406 | 21.16790347 | -1.539640989 | 0.055794787 | 0.111791808 | JMJD1C-AS1 |
| ENSG00000261553 | 1.84261353  | 16.72310317 | -3.188135383 | 0.055825422 | 0.111837349 | AL137782.1 |
| ENSG00000007314 | 3.341555177 | 0           | 4.073713166  | 0.055836774 | 0.111837349 | SCN4A      |
| ENSG00000254239 | 3.341555177 | 0           | 4.073713166  | 0.055836774 | 0.111837349 | AC002428.2 |
| ENSG00000243709 | 3.341555177 | 0           | 4.073713166  | 0.055836774 | 0.111837349 | LEFTY1     |
| ENSG00000179242 | 43.98532824 | 102.1244437 | -1.217513951 | 0.05583904  | 0.111837349 | CDH4       |
| ENSG00000100239 | 1327.780445 | 1748.919258 | -0.397334904 | 0.055854158 | 0.111850689 | PPP6R2     |
| ENSG00000144063 | 33.18423826 | 162.5490115 | -2.293290175 | 0.05585431  | 0.111850689 | MALL       |
| ENSG00000197070 | 502.2320686 | 378.5059883 | 0.407545224  | 0.055869035 | 0.111867144 | ARRDC1     |
| ENSG00000198265 | 1050.88131  | 788.1501977 | 0.415154372  | 0.055871139 | 0.111867144 | HELZ       |
| ENSG00000276093 | 8.140539051 | 1.029478846 | 2.952735563  | 0.05588393  | 0.111884132 | AL132822.1 |
| ENSG00000213212 | 3.268487194 | 12.20953807 | -1.891818479 | 0.055911981 | 0.111931667 | NCLP1      |
| ENSG00000165630 | 86.7761676  | 139.8857891 | -0.690133349 | 0.055945013 | 0.111989165 | PRPF18     |
| ENSG00000104312 | 337.492173  | 478.4839934 | -0.502936881 | 0.055959276 | 0.112009086 | RIPK2      |
| ENSG00000275162 | 0.61420451  | 6.358522421 | -3.375896575 | 0.055965921 | 0.112013759 | AC005391.1 |
| ENSG00000263990 | 23.05703009 | 8.448161695 | 1.459551381  | 0.0559723   | 0.112017896 | AC004253.1 |
| ENSG00000287998 | 6.068905845 | 0.774441189 | 3.034189874  | 0.056039601 | 0.112135549 | AC104232.3 |
| ENSG00000085831 | 3.987243448 | 12.90139112 | -1.701051354 | 0.05603972  | 0.112135549 | TTC39A     |
| ENSG00000188612 | 2074.291589 | 2848.245891 | -0.457520612 | 0.056056256 | 0.112159999 | SUMO2      |
| ENSG00000187607 | 155.8656991 | 209.3853184 | -0.425986124 | 0.056078119 | 0.112195103 | ZNF286A    |
| ENSG00000180185 | 463.1327806 | 691.5706564 | -0.578470918 | 0.056092551 | 0.112210633 | FAHD1      |
| ENSG00000117859 | 1508.129733 | 2036.196028 | -0.433050155 | 0.056098137 | 0.112210633 | OSBPL9     |
| ENSG00000272666 | 3.32769377  | 0           | 4.068382844  | 0.056120433 | 0.112210633 | U62317.1   |
| ENSG00000126952 | 3.32769377  | 0           | 4.068382844  | 0.056120433 | 0.112210633 | NXF5       |
| ENSG00000182798 | 3.32769377  | 0           | 4.068382844  | 0.056120433 | 0.112210633 | MAGEB17    |
| ENSG00000260613 | 3.32769377  | 0           | 4.068382844  | 0.056120433 | 0.112210633 | Z98885.2   |
| ENSG00000285000 | 3.32769377  | 0           | 4.068382844  | 0.056120433 | 0.112210633 | AC008581.2 |
| ENSG00000231741 | 3.32769377  | 0           | 4.068382844  | 0.056120433 | 0.112210633 | AL353743.3 |
| ENSG00000276768 | 3.326440121 | 0           | 4.067902767  | 0.056148698 | 0.112252297 | AL121890.2 |
| ENSG00000102760 | 758.5538693 | 279.8194346 | 1.438212797  | 0.056149911 | 0.112252297 | RGCC       |
| ENSG00000254602 | 13.65946156 | 26.44619637 | -0.955926468 | 0.056217641 | 0.112379051 | AP000662.1 |
| ENSG00000102226 | 1993.71685  | 1503.647942 | 0.406987252  | 0.056227706 | 0.112390523 | USP11      |
| ENSG00000229873 | 20.15359807 | 7.896920707 | 1.352754441  | 0.056235552 | 0.11239756  | OGFR-AS1   |
| ENSG00000256973 | 24.92987373 | 9.201506307 | 1.433389695  | 0.056255254 | 0.112428288 | AC053513.2 |
| ENSG00000217165 | 45.23888186 | 21.05450536 | 1.101374247  | 0.056262756 | 0.112434634 | ANKRD18EP  |
| ENSG00000102781 | 631.4035215 | 907.8169819 | -0.523572255 | 0.056282223 | 0.112464885 | KATNAL1    |
| ENSG00000196083 | 300.5570469 | 212.6996521 | 0.497572072  | 0.056316972 | 0.112525667 | IL1RAP     |
| ENSG00000163131 | 2291.523327 | 710.034806  | 1.69050127   | 0.056323383 | 0.112529823 | CTSS       |

|                 |             |             |              |             |             |            |
|-----------------|-------------|-------------|--------------|-------------|-------------|------------|
| ENSG00000171109 | 674.6411887 | 966.9623464 | -0.519115142 | 0.056388666 | 0.112648381 | MFN1       |
| ENSG00000100722 | 706.3477535 | 911.3201697 | -0.367750999 | 0.056391395 | 0.112648381 | ZC3H14     |
| ENSG00000204619 | 0           | 29.41807114 | -7.459949027 | 0.056403274 | 0.112663447 | PPP1R11    |
| ENSG00000173846 | 835.319435  | 533.3010715 | 0.647459624  | 0.056412877 | 0.112673966 | PLK3       |
| ENSG00000249096 | 7.226754179 | 1.386017859 | 2.355737916  | 0.05642895  | 0.112689875 | LINC02362  |
| ENSG00000146950 | 211.7926127 | 492.9261757 | -1.218866468 | 0.056429517 | 0.112689875 | SHROOM2    |
| ENSG00000131023 | 756.0295965 | 552.0046879 | 0.453561708  | 0.056441578 | 0.112705299 | LATS1      |
| ENSG00000203288 | 11.29967337 | 1.682349583 | 2.71285898   | 0.056518943 | 0.112847461 | TDRKH-AS1  |
| ENSG00000204060 | 7.6799924   | 0.713078025 | 3.421553035  | 0.056521458 | 0.112847461 | FOXO6      |
| ENSG00000176909 | 49.53656123 | 78.54022601 | -0.662251592 | 0.056603259 | 0.113002096 | MAMSTR     |
| ENSG00000231530 | 1.510295757 | 7.34799147  | -2.287799302 | 0.056631265 | 0.113049319 | AL157932.1 |
| ENSG00000169084 | 370.8294993 | 515.6046344 | -0.475423206 | 0.056637461 | 0.113053002 | DHRXS      |
| ENSG00000001084 | 365.1868647 | 493.4094695 | -0.433518465 | 0.056653402 | 0.113076133 | GCLC       |
| ENSG00000174276 | 150.1312623 | 209.7747223 | -0.482038136 | 0.05668133  | 0.11311936  | ZNHIT2     |
| ENSG00000284695 | 0           | 5.167463326 | -4.953815222 | 0.056683767 | 0.11311936  | AC108941.2 |
| ENSG00000189195 | 134.629757  | 80.98280828 | 0.735425632  | 0.056695108 | 0.113133303 | BTBD8      |
| ENSG00000178860 | 142.5638689 | 405.4927534 | -1.508202873 | 0.056706105 | 0.113146556 | MSC        |
| ENSG00000118492 | 3.951998741 | 0           | 4.315845035  | 0.056754288 | 0.11322812  | ADGB       |
| novel.877       | 6.213503428 | 0           | 4.970339299  | 0.056755699 | 0.11322812  | -          |
| ENSG00000180438 | 6.471713032 | 0           | 5.027003992  | 0.056813668 | 0.113335067 | TPRXL      |
| ENSG00000182901 | 26.59264497 | 12.70771663 | 1.071448329  | 0.056854123 | 0.113407062 | RGS7       |
| ENSG00000259407 | 8.779887807 | 1.345879667 | 2.66379691   | 0.056864351 | 0.113418756 | AC021739.2 |
| ENSG00000275389 | 8.13043859  | 1.456837632 | 2.490949954  | 0.056903655 | 0.113488437 | AC068790.9 |
| ENSG00000260923 | 9.850806751 | 1.733100261 | 2.488391197  | 0.05691636  | 0.113505063 | LINC02193  |
| novel.18        | 15.05510511 | 4.768345977 | 1.670590113  | 0.056954207 | 0.113571821 | -          |
| ENSG00000108733 | 222.3322456 | 136.3752593 | 0.703132525  | 0.056964068 | 0.113582767 | PEX12      |
| ENSG00000132274 | 3462.078978 | 2020.398722 | 0.776884166  | 0.05699501  | 0.113635741 | TRIM22     |
| ENSG00000160180 | 51.41004526 | 8.215761673 | 2.638909307  | 0.057007275 | 0.113644749 | TFF3       |
| ENSG00000228109 | 102.796671  | 56.91659392 | 0.855546925  | 0.057008276 | 0.113644749 | MELTF-AS1  |
| ENSG00000136631 | 913.9344605 | 675.932838  | 0.434752404  | 0.057029338 | 0.113678013 | VPS45      |
| ENSG00000138653 | 4.262861942 | 0.356539013 | 3.462611188  | 0.057071566 | 0.113753041 | NDST4      |
| ENSG00000144852 | 11.95768466 | 1.682349583 | 2.79828031   | 0.057075734 | 0.113753041 | NR1I2      |
| ENSG00000274270 | 9.102105118 | 1.426156051 | 2.668539603  | 0.057171046 | 0.11392576  | AL137060.1 |
| ENSG00000139572 | 24.69333216 | 6.429342195 | 1.957093647  | 0.057171166 | 0.11392576  | GPR84      |
| ENSG00000166963 | 1347.802421 | 1855.416218 | -0.461052211 | 0.057176253 | 0.11392716  | MAP1A      |
| ENSG00000248714 | 12.86541476 | 3.179325408 | 2.006276561  | 0.057182316 | 0.113930503 | AC091180.2 |
| ENSG00000125434 | 164.1882592 | 85.04467315 | 0.946662365  | 0.0571868   | 0.1139307   | SLC25A35   |
| ENSG00000184350 | 6.781322584 | 0           | 5.094479633  | 0.057220945 | 0.113989985 | MRGPRE     |
| ENSG00000138646 | 177.187416  | 98.16369503 | 0.8530305    | 0.057250866 | 0.114040846 | HERC5      |
| ENSG00000261474 | 35.97251987 | 16.20228698 | 1.153118569  | 0.05725889  | 0.114048084 | AC026471.4 |
| ENSG00000169217 | 1476.771264 | 1966.555061 | -0.413338996 | 0.057275772 | 0.114072965 | CD2BP2     |
| ENSG00000271643 | 56.88953519 | 94.06756538 | -0.727700306 | 0.057303995 | 0.114120428 | AC112220.2 |
| ENSG00000234678 | 63.39599473 | 38.86934963 | 0.707528628  | 0.057331627 | 0.114166705 | ELF3-AS1   |
| ENSG00000228474 | 1738.416812 | 2480.211203 | -0.512764529 | 0.057342934 | 0.114180469 | OST4       |
| ENSG00000064651 | 968.8505707 | 396.3299505 | 1.289298031  | 0.05739099  | 0.114267401 | SLC12A2    |
| ENSG00000286427 | 6.026067974 | 0.713078025 | 3.073226446  | 0.057405251 | 0.114287036 | AC009486.2 |
| ENSG00000139330 | 5.847479332 | 0           | 4.880598055  | 0.057425396 | 0.114315253 | KERA       |
| ENSG00000139684 | 1794.366569 | 2291.50341  | -0.352809248 | 0.057428224 | 0.114315253 | ESD        |
| ENSG00000162482 | 40.38953822 | 17.17027427 | 1.238660432  | 0.057448919 | 0.114347688 | AKR7A3     |
| ENSG00000164746 | 13.28563083 | 3.72941052  | 1.853602503  | 0.057479491 | 0.114399774 | C7orf57    |
| ENSG00000235381 | 26.93373828 | 48.47125756 | -0.850920819 | 0.0575237   | 0.114478993 | AL596202.1 |



|                 |             |             |              |             |             |            |
|-----------------|-------------|-------------|--------------|-------------|-------------|------------|
| ENSG00000278053 | 112.0396124 | 190.5123687 | -0.766302558 | 0.057556804 | 0.1145361   | DDX52      |
| ENSG00000205456 | 4.803998469 | 0.387220594 | 3.637473655  | 0.057572111 | 0.114555249 | TP53TG3D   |
| ENSG00000219665 | 41.80892983 | 66.74041778 | -0.673571613 | 0.057575245 | 0.114555249 | ZNF433-AS1 |
| ENSG00000175611 | 84.27275074 | 48.15485674 | 0.803502153  | 0.057614703 | 0.114605842 | LINC00476  |
| ENSG00000176349 | 0           | 5.23699883  | -4.966889428 | 0.057618317 | 0.114605842 | AC104129.1 |
| ENSG00000110244 | 0           | 5.23699883  | -4.966889428 | 0.057618317 | 0.114605842 | APOA4      |
| ENSG00000265799 | 0           | 5.23699883  | -4.966889428 | 0.057618317 | 0.114605842 | AC090844.3 |
| ENSG00000206562 | 241.5655059 | 321.2490244 | -0.411772402 | 0.057628969 | 0.114618254 | METTL6     |
| ENSG00000213799 | 162.3199323 | 114.0251926 | 0.509190057  | 0.057662982 | 0.114677122 | ZNF845     |
| ENSG00000272702 | 6.349538934 | 15.80560977 | -1.314804169 | 0.057678063 | 0.114693688 | AC010913.1 |
| ENSG00000187024 | 3.342808826 | 0           | 4.074203769  | 0.057680141 | 0.114693688 | PTRH1      |
| ENSG00000176092 | 9.206656863 | 1.069617038 | 3.099125714  | 0.057685219 | 0.114695009 | CRYBG2     |
| novel.133       | 11.21908349 | 24.81459746 | -1.145341497 | 0.057699389 | 0.114714403 | -          |
| ENSG00000177854 | 183.3382088 | 268.0922661 | -0.54738766  | 0.057713816 | 0.114734306 | TMEM187    |
| ENSG00000273723 | 28.78129513 | 14.02175884 | 1.037989394  | 0.057718835 | 0.114735505 | AL139089.1 |
| ENSG00000188039 | 3.340301529 | 0           | 4.073243849  | 0.057738194 | 0.114747649 | NWD1       |
| ENSG00000272710 | 3.340301529 | 0           | 4.073243849  | 0.057738194 | 0.114747649 | AC133041.1 |
| ENSG00000261996 | 3.340301529 | 0           | 4.073243849  | 0.057738194 | 0.114747649 | AC004706.1 |
| ENSG00000271848 | 5.406848869 | 0.693008929 | 2.932925208  | 0.057751286 | 0.114764888 | AC073389.2 |
| ENSG00000285584 | 0           | 5.206317249 | -4.958837546 | 0.057775056 | 0.114803345 | AL158800.1 |
| ENSG00000273381 | 11.78285697 | 4.004517274 | 1.566868301  | 0.057784301 | 0.114812933 | AL158071.5 |
| ENSG00000185670 | 109.085109  | 73.64226564 | 0.566006313  | 0.057790045 | 0.114815567 | ZBTB3      |
| ENSG00000165349 | 5.84873298  | 0           | 4.880898304  | 0.057796086 | 0.114818789 | SLC7A3     |
| ENSG00000141384 | 75.11240796 | 122.9227899 | -0.709026047 | 0.057803534 | 0.114824805 | TAF4B      |
| ENSG00000147905 | 314.2996487 | 462.7779112 | -0.557601637 | 0.05782184  | 0.114838255 | ZCCHC7     |
| ENSG00000228668 | 4.484288455 | 0.336469917 | 3.539097916  | 0.057823501 | 0.114838255 | TRGV5P     |
| ENSG00000101883 | 4.207416313 | 0.356539013 | 3.446405844  | 0.057823565 | 0.114838255 | RHOXF1     |
| ENSG00000287222 | 60.2358915  | 36.56737943 | 0.715909144  | 0.057857004 | 0.114895881 | AC234917.3 |
| ENSG00000258725 | 5.088392504 | 15.61077941 | -1.609813888 | 0.057865447 | 0.114903866 | PRC1-AS1   |
| ENSG00000205622 | 10.15916265 | 1.426156051 | 2.829083914  | 0.057872967 | 0.114910016 | AP001042.1 |
| ENSG00000211649 | 4.608969851 | 0           | 4.536888443  | 0.057880137 | 0.114915469 | IGLV7-46   |
| ENSG00000118058 | 1497.039917 | 983.2218138 | 0.606818387  | 0.057897762 | 0.114941678 | KMT2A      |
| ENSG00000040341 | 474.6053873 | 338.8122515 | 0.486168401  | 0.057980531 | 0.115097202 | STAU2      |
| ENSG00000277151 | 12.67644092 | 4.391737868 | 1.542335373  | 0.058024558 | 0.1151758   | AL138820.1 |
| ENSG00000226445 | 91.37006584 | 50.68349476 | 0.849882834  | 0.058046979 | 0.115211501 | BX322234.1 |
| ENSG00000170296 | 63.03247793 | 37.88116485 | 0.73640303   | 0.058085831 | 0.115279809 | GABARAP    |
| ENSG00000258162 | 7.356592712 | 0           | 5.212276058  | 0.058122124 | 0.115341185 | AC069228.1 |
| ENSG00000046604 | 36.34204766 | 139.6782913 | -1.943299015 | 0.058125635 | 0.115341185 | DSG2       |
| ENSG00000257671 | 0           | 28.38859229 | -7.408568479 | 0.058130998 | 0.115343016 | KRT7-AS    |
| ENSG00000153487 | 565.9701962 | 403.2499759 | 0.489383096  | 0.058156397 | 0.115384601 | ING1       |
| ENSG00000239388 | 21.04718202 | 8.029103644 | 1.398757865  | 0.058178248 | 0.11541914  | ASB14      |
| ENSG00000280147 | 0           | 5.267680412 | -4.974926563 | 0.058219855 | 0.115484047 | AC084026.3 |
| novel.908       | 0           | 5.267680412 | -4.974926563 | 0.058219855 | 0.115484047 | -          |
| ENSG00000123609 | 543.0549567 | 279.7769849 | 0.955913248  | 0.058335481 | 0.115704569 | NMI        |
| ENSG00000116903 | 264.4739636 | 367.6967106 | -0.475701807 | 0.058344521 | 0.115713664 | EXOC8      |
| novel.749       | 3.312578714 | 0           | 4.062538296  | 0.058386948 | 0.115753627 | -          |
| ENSG00000277893 | 3.312578714 | 0           | 4.062538296  | 0.058386948 | 0.115753627 | SRD5A2     |
| ENSG00000232070 | 3.312578714 | 0           | 4.062538296  | 0.058386948 | 0.115753627 | TMEM253    |
| ENSG00000255794 | 3.312578714 | 0           | 4.062538296  | 0.058386948 | 0.115753627 | RMST       |
| ENSG00000267015 | 3.312578714 | 0           | 4.062538296  | 0.058386948 | 0.115753627 | AC023090.1 |
| ENSG00000157423 | 9.884797809 | 2.211209725 | 2.178543094  | 0.058407092 | 0.115784728 | HYDIN      |

|                 |             |             |              |             |             |            |
|-----------------|-------------|-------------|--------------|-------------|-------------|------------|
| ENSG00000147403 | 19283.65076 | 24991.97163 | -0.374083931 | 0.058434172 | 0.115829574 | RPL10      |
| ENSG00000274128 | 6.162103479 | 0           | 4.956233121  | 0.058455428 | 0.115862869 | AC027807.2 |
| ENSG00000166770 | 346.1028606 | 240.3699824 | 0.527230316  | 0.05850562  | 0.115948432 | ZNF667-AS1 |
| ENSG00000206149 | 8.451402252 | 24.84065554 | -1.554281221 | 0.058507522 | 0.115948432 | HERC2P9    |
| ENSG00000166881 | 511.7300445 | 729.4992793 | -0.511565887 | 0.058603424 | 0.116129628 | NEMP1      |
| ENSG00000145214 | 423.755852  | 604.739739  | -0.513195051 | 0.058614199 | 0.116142123 | DGKQ       |
| ENSG00000279307 | 5.782004512 | 18.55988815 | -1.685188076 | 0.058650995 | 0.11620617  | AC012065.5 |
| ENSG00000091157 | 400.9487705 | 299.9722992 | 0.418933513  | 0.058669834 | 0.116234631 | WDR7       |
| ENSG00000005893 | 4455.056069 | 3372.957297 | 0.401462853  | 0.058685295 | 0.116256397 | LAMP2      |
| ENSG00000257258 | 6.661727055 | 0.672939833 | 3.256304471  | 0.058692396 | 0.116261599 | AC012150.1 |
| ENSG00000112769 | 8697.451766 | 11275.71852 | -0.374548073 | 0.058781677 | 0.116423946 | LAMA4      |
| novel.764       | 24.32730806 | 11.34305213 | 1.093312788  | 0.058783316 | 0.116423946 | -          |
| ENSG00000233885 | 40.97817121 | 19.96366335 | 1.035874612  | 0.058789701 | 0.116427718 | YEATS2-AS1 |
| ENSG00000171824 | 1921.271333 | 1467.288082 | 0.388993301  | 0.058837073 | 0.116512651 | EXOSC10    |
| ENSG00000105229 | 791.7304452 | 551.7574849 | 0.521284739  | 0.058859694 | 0.116548564 | PIAS4      |
| ENSG00000064607 | 2080.605151 | 3017.001353 | -0.535987541 | 0.058932199 | 0.116683239 | SUGP2      |
| ENSG00000259921 | 4.790137061 | 0.356539013 | 3.633735493  | 0.058942509 | 0.116694759 | AC022819.1 |
| ENSG00000099869 | 72.39468669 | 11.4882877  | 2.652694606  | 0.058981879 | 0.116763807 | IGF2-AS    |
| ENSG00000160539 | 185.5858086 | 104.2990173 | 0.832716767  | 0.058987794 | 0.11676662  | PLPP7      |
| ENSG00000239552 | 1.232169966 | 7.529769209 | -2.622666518 | 0.059001831 | 0.116773428 | HOXB-AS2   |
| ENSG00000135473 | 823.206282  | 589.5715884 | 0.481937297  | 0.059003739 | 0.116773428 | PAN2       |
| ENSG00000108474 | 196.3446458 | 296.2187571 | -0.592520241 | 0.059004717 | 0.116773428 | PIGL       |
| ENSG00000258670 | 6.771293394 | 0.336469917 | 4.130129549  | 0.059086884 | 0.116927133 | AL049874.3 |
| ENSG00000100380 | 3647.647906 | 4876.7662   | -0.418928665 | 0.059096504 | 0.116937263 | ST13       |
| ENSG00000019169 | 16.21212707 | 2.557136252 | 2.669995443  | 0.059185614 | 0.117097229 | MARCO      |
| ENSG00000214941 | 456.6987636 | 345.4491387 | 0.403039068  | 0.05918636  | 0.117097229 | ZSWIM7     |
| ENSG00000145495 | 2543.572918 | 1977.717709 | 0.363083779  | 0.059208907 | 0.117132918 | 6-Mar      |
| ENSG00000228983 | 3.660011542 | 0           | 4.204625415  | 0.059253699 | 0.117212605 | SLC47A1P1  |
| ENSG00000125089 | 693.0846877 | 236.7291271 | 1.549205227  | 0.059283844 | 0.117263308 | SH3TC1     |
| ENSG00000100227 | 1525.158441 | 1984.496822 | -0.379956536 | 0.05939501  | 0.117474251 | POLDIP3    |
| ENSG00000226608 | 109.5509549 | 225.3649063 | -1.039673094 | 0.059498254 | 0.117669494 | FTLP3      |
| novel.519       | 1.801029308 | 8.814157318 | -2.281375872 | 0.059581108 | 0.117824384 | -          |
| ENSG00000271778 | 8.371994754 | 1.753169357 | 2.242092317  | 0.05960738  | 0.117867367 | AC080013.3 |
| ENSG00000197106 | 0.922560414 | 7.091669543 | -2.946156522 | 0.059633535 | 0.117910111 | SLC6A17    |
| ENSG00000253304 | 137.0164688 | 372.3573438 | -1.442551752 | 0.059655965 | 0.117936844 | TMEM200B   |
| ENSG00000119414 | 1257.159148 | 984.8677881 | 0.351926315  | 0.059656133 | 0.117936844 | PPP6C      |
| ENSG00000074416 | 4691.367793 | 6293.550261 | -0.423832392 | 0.059663065 | 0.117941574 | MGLL       |
| ENSG00000145431 | 669.4175863 | 478.8059165 | 0.48392783   | 0.059687437 | 0.117972374 | PDGFC      |
| ENSG00000122026 | 5580.178061 | 8600.321444 | -0.624089319 | 0.059687728 | 0.117972374 | RPL21      |
| ENSG00000177191 | 56.16164739 | 29.20980296 | 0.945006894  | 0.059696632 | 0.117980999 | B3GNT8     |
| ENSG00000171033 | 421.7922634 | 276.0287299 | 0.612006412  | 0.05970123  | 0.11798111  | PKIA       |
| ENSG00000105298 | 458.3864381 | 642.0843038 | -0.486019363 | 0.059716905 | 0.118003112 | CACTIN     |
| ENSG00000262786 | 0           | 5.298361994 | -4.982965428 | 0.059725713 | 0.11801154  | AC005224.1 |
| ENSG00000170852 | 1116.602975 | 866.7379767 | 0.365543941  | 0.059731287 | 0.118013579 | KBTBD2     |
| ENSG00000156345 | 193.7861397 | 117.8258552 | 0.716329899  | 0.059774586 | 0.118090146 | CDK20      |
| ENSG00000169446 | 517.1953289 | 747.8602874 | -0.532527948 | 0.059797492 | 0.118126417 | MMGT1      |
| ENSG00000153774 | 637.9429011 | 961.7124108 | -0.592004277 | 0.059836987 | 0.118188158 | CFDP1      |
| ENSG00000170927 | 5.851240278 | 0           | 4.881510605  | 0.059837844 | 0.118188158 | PKHD1      |
| ENSG00000287539 | 7.491018563 | 1.386017859 | 2.409903938  | 0.059852332 | 0.118207787 | AC022966.3 |
| ENSG00000182973 | 325.290824  | 454.5700435 | -0.483186215 | 0.059965018 | 0.11842134  | CNOT10     |
| ENSG00000260249 | 5.842464737 | 0           | 4.879431292  | 0.059974408 | 0.118430881 | AC007608.3 |

|                 |             |             |              |             |             |            |
|-----------------|-------------|-------------|--------------|-------------|-------------|------------|
| ENSG00000274386 | 20.05183836 | 6.279530307 | 1.663616318  | 0.060005036 | 0.118482356 | TMEM269    |
| ENSG00000182400 | 75.58953678 | 111.5894984 | -0.56199058  | 0.060044817 | 0.118551895 | TRAPPC6B   |
| ENSG00000199005 | 0           | 3.342189926 | -4.316591824 | 0.060095034 | 0.118642028 | MIR370     |
| ENSG00000226416 | 6.664234352 | 1.130980201 | 2.597202555  | 0.060119771 | 0.118681845 | MRPL23-AS1 |
| ENSG00000162735 | 734.4180122 | 995.4790585 | -0.439078683 | 0.060179293 | 0.118790322 | PEX19      |
| ENSG00000274929 | 8.17453011  | 1.722487775 | 2.217190431  | 0.060195466 | 0.118813219 | AL157813.1 |
| ENSG00000188316 | 11.06660801 | 2.435565801 | 2.167834111  | 0.060203761 | 0.118820566 | ENO4       |
| ENSG00000261220 | 20.36904108 | 41.76154314 | -1.033220661 | 0.060277437 | 0.118949852 | AC103706.1 |
| ENSG00000108960 | 530.7659544 | 808.832766  | -0.60742011  | 0.060278424 | 0.118949852 | MMD        |
| ENSG00000251819 | 9.220233536 | 1.161661783 | 3.035575002  | 0.060312328 | 0.119001297 | RNU6-322P  |
| ENSG00000196498 | 4008.804384 | 5368.03592  | -0.421183746 | 0.060315301 | 0.119001297 | NCOR2      |
| ENSG00000259032 | 40.3515724  | 63.24366407 | -0.6487294   | 0.060320159 | 0.119001297 | ENSAP2     |
| ENSG00000100568 | 1532.892894 | 1164.449566 | 0.396528759  | 0.060322816 | 0.119001297 | VT11B      |
| novel.206       | 5.737912992 | 0           | 4.854396232  | 0.06033277  | 0.119011897 | -          |
| ENSG00000130724 | 1930.834012 | 1506.607312 | 0.35794329   | 0.060389299 | 0.119114361 | CHMP2A     |
| ENSG00000214553 | 3.677633896 | 0           | 4.210960275  | 0.060420302 | 0.119166467 | LRRC37A11P |
| ENSG00000137842 | 340.6457667 | 228.8993705 | 0.57349909   | 0.060503574 | 0.119321645 | TMEM62     |
| ENSG00000205277 | 7.656030532 | 1.436768536 | 2.411885604  | 0.060565547 | 0.1194348   | MUC12      |
| ENSG00000167740 | 406.3297906 | 300.3481025 | 0.435243517  | 0.060640856 | 0.119574231 | CYB5D2     |
| ENSG00000286657 | 3.356670233 | 0           | 4.079573932  | 0.060698219 | 0.119660097 | AC008453.2 |
| ENSG00000223318 | 3.356670233 | 0           | 4.079573932  | 0.060698219 | 0.119660097 | RNA5SP111  |
| ENSG00000286984 | 3.356670233 | 0           | 4.079573932  | 0.060698219 | 0.119660097 | AC090578.3 |
| ENSG00000205002 | 22.12597887 | 9.468312325 | 1.212966739  | 0.060728618 | 0.119693413 | AARD       |
| ENSG00000239941 | 3.355416585 | 0           | 4.079093285  | 0.060728939 | 0.119693413 | AC108718.1 |
| ENSG00000234506 | 3.355416585 | 0           | 4.079093285  | 0.060728939 | 0.119693413 | LINC01506  |
| ENSG00000165055 | 439.1824391 | 587.4097296 | -0.419594078 | 0.060757339 | 0.119740303 | METT12B    |
| ENSG00000104218 | 302.1630201 | 211.6263106 | 0.513502684  | 0.060773036 | 0.119762154 | CSPP1      |
| ENSG00000184163 | 24.03650324 | 48.91868544 | -1.028273402 | 0.060858565 | 0.119921607 | C1QTNF12   |
| ENSG00000164754 | 2662.56707  | 3381.938934 | -0.345070474 | 0.060899946 | 0.119994047 | RAD21      |
| ENSG00000271826 | 8.484139662 | 19.48311374 | -1.198343058 | 0.060906146 | 0.119997163 | PLS3-AS1   |
| ENSG00000286847 | 6.613803318 | 1.049547942 | 2.636327851  | 0.060967713 | 0.120109353 | AC007036.4 |
| ENSG00000243943 | 601.8371252 | 455.6632317 | 0.401735381  | 0.060986528 | 0.12013731  | ZNF512     |
| ENSG00000265787 | 31.7627388  | 0           | 7.322921835  | 0.061040293 | 0.120234105 | CYP4F35P   |
| ENSG00000113597 | 469.9616865 | 333.8570847 | 0.492494091  | 0.061072785 | 0.120288988 | TRAPPC13   |
| ENSG00000198580 | 19.04994172 | 8.631223704 | 1.143605215  | 0.061105317 | 0.120343938 | AC073343.1 |
| ENSG00000212533 | 0           | 3.302051734 | -4.300859437 | 0.061150806 | 0.120424399 | RF00072    |
| ENSG00000228021 | 6.402477266 | 1.049547942 | 2.586001006  | 0.061171845 | 0.120456323 | AL158835.1 |
| ENSG00000239381 | 3.576843098 | 0           | 4.174510327  | 0.06117629  | 0.120456323 | AC125613.1 |
| ENSG00000187778 | 885.53137   | 1152.993771 | -0.380942853 | 0.061251846 | 0.120595954 | MCRS1      |
| ENSG00000273245 | 6.272710004 | 1.080229524 | 2.543560434  | 0.061337002 | 0.120754463 | AC092653.1 |
| ENSG00000105501 | 3.328947419 | 0           | 4.068858757  | 0.061384158 | 0.120838143 | SIGLEC5    |
| ENSG00000137409 | 4009.145197 | 5445.840442 | -0.441801467 | 0.061408085 | 0.120876086 | MTCH1      |
| ENSG00000114487 | 5.7517744   | 0           | 4.857737366  | 0.061414901 | 0.120880344 | MORC1      |
| ENSG00000230596 | 1.493927053 | 7.621813954 | -2.340159843 | 0.061426135 | 0.120893297 | GPAA1P2    |
| ENSG00000249234 | 3.325186472 | 0           | 4.067408118  | 0.061478029 | 0.120983533 | AC108063.1 |
| ENSG00000049167 | 129.9455675 | 190.5577723 | -0.553759729 | 0.061481297 | 0.120983533 | ERCC8      |
| ENSG00000226237 | 4.237646425 | 13.60629681 | -1.689201627 | 0.06153266  | 0.121075434 | GAS1RR     |
| novel.985       | 31.45535146 | 0           | 7.308893389  | 0.061538949 | 0.12107864  | -          |
| ENSG00000178201 | 18.33362149 | 5.869800472 | 1.653549158  | 0.061545802 | 0.121082954 | VN1R1      |
| novel.177       | 4.223785018 | 0.387220594 | 3.451160107  | 0.061591318 | 0.121163326 | -          |
| ENSG00000197905 | 195.4243361 | 342.5744582 | -0.810532596 | 0.061596908 | 0.121165148 | TEAD4      |

|                 |             |             |              |             |             |            |
|-----------------|-------------|-------------|--------------|-------------|-------------|------------|
| ENSG00000177119 | 2471.278212 | 1622.450992 | 0.607056525  | 0.061614564 | 0.121182042 | ANO6       |
| ENSG00000135185 | 291.0774923 | 429.7838034 | -0.561733495 | 0.061614825 | 0.121182042 | TMEM243    |
| ENSG00000111371 | 1185.319705 | 2140.729675 | -0.852786381 | 0.061622361 | 0.121187689 | SLC38A1    |
| ENSG00000219085 | 3.623441915 | 0           | 4.19143251   | 0.061683281 | 0.121298313 | NPM1P37    |
| ENSG00000267108 | 24.94122784 | 10.64058659 | 1.225429823  | 0.061744377 | 0.121409268 | AP001029.1 |
| ENSG00000254731 | 3.313832363 | 0           | 4.062993015  | 0.061763224 | 0.121409574 | AP003059.1 |
| ENSG00000275344 | 3.313832363 | 0           | 4.062993015  | 0.061763224 | 0.121409574 | MIR6503    |
| ENSG00000215704 | 3.313832363 | 0           | 4.062993015  | 0.061763224 | 0.121409574 | CELA2B     |
| ENSG00000257703 | 3.313832363 | 0           | 4.062993015  | 0.061763224 | 0.121409574 | AC068643.1 |
| ENSG00000278635 | 1.788421549 | 7.765893646 | -2.112835966 | 0.061781256 | 0.12143583  | AC141557.2 |
| ENSG00000135824 | 3.311325065 | 0           | 4.062023003  | 0.061826386 | 0.121478696 | RGS8       |
| ENSG00000279447 | 3.311325065 | 0           | 4.062023003  | 0.061826386 | 0.121478696 | AL118508.3 |
| ENSG00000227888 | 3.311325065 | 0           | 4.062023003  | 0.061826386 | 0.121478696 | FAM66A     |
| ENSG00000253976 | 3.311325065 | 0           | 4.062023003  | 0.061826386 | 0.121478696 | AC022679.2 |
| ENSG00000253965 | 3.617173671 | 0           | 4.189170291  | 0.061831793 | 0.121478696 | AC008438.2 |
| ENSG00000260351 | 3.617173671 | 0           | 4.189170291  | 0.061831793 | 0.121478696 | AC024270.2 |
| ENSG00000228793 | 13.11080314 | 4.351599676 | 1.595758313  | 0.061836366 | 0.121478696 | AL033523.1 |
| ENSG00000129187 | 1629.220714 | 2297.969529 | -0.496323665 | 0.061840469 | 0.121478696 | DCTD       |
| novel.982       | 7.051641749 | 0           | 5.152893779  | 0.061860491 | 0.12150884  | -          |
| ENSG00000154240 | 281.3722799 | 179.7041656 | 0.646883425  | 0.061877615 | 0.121533287 | CEP112     |
| ENSG00000139351 | 12.12903615 | 3.709341424 | 1.728348067  | 0.061948189 | 0.121662703 | SYCP3      |
| ENSG00000232303 | 5.131230375 | 0.723690511 | 2.834798273  | 0.061964714 | 0.121685958 | DFFBP1     |
| ENSG00000214717 | 1008.745519 | 1368.521706 | -0.439879871 | 0.06200123  | 0.121748466 | ZBED1      |
| ENSG00000166833 | 707.7649114 | 1132.192654 | -0.677724189 | 0.062039715 | 0.12181483  | NAV2       |
| ENSG00000287059 | 6.163357128 | 0           | 4.956546211  | 0.062072286 | 0.121860364 | AC090004.2 |
| ENSG00000287289 | 6.163357128 | 0           | 4.956546211  | 0.062072286 | 0.121860364 | AP000428.2 |
| ENSG00000274114 | 4.280484296 | 0.336469917 | 3.46785942   | 0.062090839 | 0.121887578 | ALOX15P1   |
| ENSG00000054803 | 3.676380247 | 0           | 4.210537601  | 0.062110838 | 0.121908414 | CBLN4      |
| ENSG00000226277 | 3.676380247 | 0           | 4.210537601  | 0.062110838 | 0.121908414 | AC105393.1 |
| ENSG00000181894 | 264.305974  | 193.1463137 | 0.452642917  | 0.062123878 | 0.121924797 | ZNF329     |
| ENSG00000203434 | 0           | 3.790773684 | -4.496852127 | 0.062146262 | 0.121959516 | AL353740.1 |
| ENSG00000285535 | 3.991004395 | 0           | 4.328982275  | 0.062270229 | 0.122193566 | AC021683.5 |
| ENSG00000197020 | 15.87966676 | 4.463713517 | 1.845782226  | 0.062294215 | 0.122231402 | ZNF100     |
| ENSG00000119522 | 283.1169377 | 414.4322525 | -0.549523003 | 0.062303298 | 0.122239994 | DENND1A    |
| ENSG0000023330  | 660.3678189 | 922.5622219 | -0.482235835 | 0.062386011 | 0.122388625 | ALAS1      |
| ENSG00000240498 | 61.17947921 | 35.50477886 | 0.785568603  | 0.062388474 | 0.122388625 | CDKN2B-AS1 |
| ENSG00000121769 | 39.76000484 | 101.087422  | -1.344992059 | 0.062433913 | 0.122460152 | FABP3      |
| ENSG00000085511 | 1076.570501 | 732.0090731 | 0.556911391  | 0.062434363 | 0.122460152 | MAP3K4     |
| ENSG00000234261 | 0           | 5.329043575 | -4.991023381 | 0.062472956 | 0.122517352 | AL138720.1 |
| ENSG00000253270 | 0           | 5.329043575 | -4.991023381 | 0.062472956 | 0.122517352 | AC090541.1 |
| ENSG00000120925 | 525.2763053 | 400.9629845 | 0.389110188  | 0.062509971 | 0.12258069  | RNF170     |
| ENSG00000214413 | 405.067078  | 301.9865423 | 0.423774828  | 0.062557266 | 0.122664176 | BBIP1      |
| ENSG00000230113 | 3.977142987 | 0           | 4.324330431  | 0.062578096 | 0.122686934 | AC138207.1 |
| ENSG00000205464 | 141.3035217 | 81.2679324  | 0.795834609  | 0.062578317 | 0.122686934 | ATP6AP1L   |
| ENSG00000171611 | 10.84894245 | 2.557136252 | 2.095114275  | 0.062603835 | 0.122727703 | PTCRA      |
| ENSG00000106991 | 3557.476753 | 7048.944154 | -0.986592943 | 0.062714758 | 0.122930197 | ENG        |
| ENSG00000253328 | 5.492524611 | 0.743759607 | 2.913890373  | 0.062716591 | 0.122930197 | SUMO2P19   |
| ENSG00000244588 | 0.89358395  | 8.955796865 | -3.312864524 | 0.06274261  | 0.122971635 | RAD21L1    |
| ENSG00000262903 | 53.5653889  | 84.59180422 | -0.65666847  | 0.062747198 | 0.122971635 | AC027796.4 |
| ENSG00000178053 | 273.0981851 | 187.834561  | 0.540605695  | 0.062772337 | 0.123011622 | MLF1       |
| ENSG00000100325 | 957.4141138 | 1346.978539 | -0.492399372 | 0.062781281 | 0.12301987  | ASCC2      |

|                 |             |             |              |             |             |            |
|-----------------|-------------|-------------|--------------|-------------|-------------|------------|
| ENSG00000233585 | 12.75047782 | 2.058957692 | 2.611550574  | 0.062840581 | 0.123118321 | AC231533.2 |
| ENSG00000125337 | 6.678024489 | 0.336469917 | 4.111159758  | 0.062841001 | 0.123118321 | KIF25      |
| ENSG00000174233 | 1445.907056 | 2048.186159 | -0.502302195 | 0.06287683  | 0.123173485 | ADCY6      |
| ENSG00000050130 | 801.4356257 | 1057.400217 | -0.400126734 | 0.062878639 | 0.123173485 | JKAMP      |
| ENSG00000196427 | 5.66226644  | 0           | 4.836015674  | 0.062889236 | 0.123183715 | NBPF4      |
| ENSG00000105849 | 347.5440197 | 631.0963558 | -0.861107085 | 0.062895339 | 0.123183715 | TWISTNB    |
| ENSG00000165886 | 556.4620215 | 834.4846963 | -0.584240881 | 0.062898086 | 0.123183715 | UBTD1      |
| ENSG00000151729 | 997.4157427 | 546.7500989 | 0.866815367  | 0.062960053 | 0.123295781 | SLC25A4    |
| ENSG00000112167 | 238.6360754 | 171.560812  | 0.475602238  | 0.062997429 | 0.123359677 | SAYS1      |
| ENSG00000264281 | 64.11761429 | 102.9244294 | -0.685309385 | 0.063015245 | 0.123367172 | AC016596.2 |
| ENSG00000266288 | 5.654744548 | 0           | 4.834180312  | 0.063015501 | 0.123367172 | AP005671.1 |
| ENSG00000236197 | 5.654744548 | 0           | 4.834180312  | 0.063015501 | 0.123367172 | AC002429.2 |
| ENSG00000179363 | 7.194016769 | 1.467450118 | 2.312411727  | 0.063046791 | 0.123419129 | TMEM31     |
| ENSG00000129007 | 1.789675198 | 8.895717972 | -2.306983987 | 0.063089313 | 0.123493064 | CALML4     |
| ENSG00000164053 | 225.262661  | 362.5981536 | -0.686794684 | 0.063112457 | 0.123529059 | ATRIP      |
| ENSG00000165617 | 138.9287168 | 433.5045024 | -1.641675725 | 0.06313441  | 0.12356113  | DACT1      |
| ENSG00000083896 | 222.8610747 | 352.295822  | -0.660249875 | 0.063138354 | 0.12356113  | YTHDC1     |
| ENSG00000064309 | 61.07632365 | 32.11885472 | 0.929283036  | 0.063169459 | 0.123612692 | CDON       |
| ENSG00000150361 | 3.631035079 | 0           | 4.194190258  | 0.063195179 | 0.123653709 | KLHL1      |
| ENSG00000138399 | 275.6632164 | 384.0494518 | -0.477875972 | 0.063262444 | 0.123776003 | FASTKD1    |
| ENSG00000277382 | 1.230916317 | 6.399944883 | -2.392579668 | 0.063276495 | 0.123794174 | AC005837.3 |
| ENSG00000183186 | 3.369277992 | 14.50205166 | -2.105391199 | 0.063291358 | 0.123813928 | C2CD4C     |
| novel.288       | 11.84331719 | 3.455588036 | 1.754148022  | 0.063303514 | 0.123828383 | -          |
| ENSG00000256006 | 4.532140921 | 13.52229601 | -1.571506163 | 0.063321961 | 0.123855143 | AC084117.1 |
| ENSG00000233521 | 0.308355904 | 3.627909165 | -3.475691776 | 0.06338777  | 0.123973867 | LINC01638  |
| ENSG00000113734 | 160.8645123 | 222.1379251 | -0.465641855 | 0.063392203 | 0.123973867 | BNIP1      |
| novel.478       | 41.69860839 | 103.7573141 | -1.314864888 | 0.063456851 | 0.124090957 | -          |
| ENSG00000242616 | 0           | 3.159256312 | -4.244596704 | 0.063472187 | 0.124102265 | GNG10      |
| ENSG00000123364 | 0           | 3.159256312 | -4.244596704 | 0.063472187 | 0.124102265 | HOXC13     |
| novel.591       | 5.321173127 | 0.356539013 | 3.786485942  | 0.063543946 | 0.124233221 | -          |
| ENSG00000112146 | 1107.563054 | 837.3945913 | 0.403426859  | 0.063607706 | 0.124348519 | FBXO9      |
| ENSG00000071243 | 280.6714467 | 188.253362  | 0.57541443   | 0.063628954 | 0.124371066 | ING3       |
| ENSG00000248663 | 3.357923882 | 0           | 4.08009168   | 0.063646968 | 0.124371066 | LINC00992  |
| ENSG00000271734 | 3.357923882 | 0           | 4.08009168   | 0.063646968 | 0.124371066 | Z98200.1   |
| ENSG00000189233 | 3.357923882 | 0           | 4.08009168   | 0.063646968 | 0.124371066 | NUGGC      |
| ENSG00000259954 | 3.357923882 | 0           | 4.08009168   | 0.063646968 | 0.124371066 | IL21R-AS1  |
| ENSG00000133101 | 15.84692935 | 4.852218381 | 1.690163889  | 0.063647962 | 0.124371066 | CCNA1      |
| ENSG00000231770 | 105.3702925 | 68.9020327  | 0.613839896  | 0.063668826 | 0.124402479 | TMEM44-AS1 |
| ENSG00000100280 | 1898.852752 | 2450.097892 | -0.367660376 | 0.063682174 | 0.124418478 | AP1B1      |
| ENSG00000227855 | 36.25350897 | 12.5650496  | 1.521856502  | 0.063686592 | 0.124418478 | DPY19L2P3  |
| ENSG00000272668 | 97.09752236 | 47.26354981 | 1.037830026  | 0.06372809  | 0.124490188 | AL590560.2 |
| ENSG00000105223 | 4245.487635 | 6021.469153 | -0.504174191 | 0.063739217 | 0.124502503 | PLD3       |
| ENSG00000287655 | 3.354162936 | 0           | 4.078644519  | 0.063743978 | 0.124502503 | AC023283.1 |
| ENSG00000251023 | 11.46447187 | 2.486316478 | 2.199707437  | 0.063776538 | 0.124556735 | AC114980.1 |
| ENSG00000224631 | 400.0706138 | 570.9104689 | -0.513250711 | 0.063802772 | 0.124598604 | RPS27AP16  |
| ENSG00000229236 | 12.63353178 | 1.365948763 | 3.186777705  | 0.063817127 | 0.124617269 | TTY10      |
| ENSG00000273230 | 90.39771513 | 58.66642405 | 0.626756762  | 0.063846626 | 0.124665504 | AC102953.2 |
| ENSG00000215302 | 37.23771198 | 19.4253466  | 0.932294938  | 0.063862176 | 0.124681669 | AC127502.1 |
| ENSG00000147036 | 21.54605015 | 1.782695063 | 3.592192095  | 0.063866574 | 0.124681669 | LANCL3     |
| ENSG00000273812 | 3.928036872 | 0.387220594 | 3.346197     | 0.063869302 | 0.124681669 | BX640514.2 |
| ENSG00000166004 | 125.6305227 | 183.3194074 | -0.54485182  | 0.063876743 | 0.124686826 | CEP295     |

|                 |             |             |              |             |             |             |
|-----------------|-------------|-------------|--------------|-------------|-------------|-------------|
| ENSG00000173702 | 0.307102255 | 4.085949533 | -3.643243289 | 0.063883747 | 0.12469113  | MUC13       |
| ENSG00000226049 | 19.77253019 | 39.88590424 | -1.013564624 | 0.063898898 | 0.124711334 | TLK2P1      |
| ENSG00000142686 | 714.6851009 | 512.2792684 | 0.47981926   | 0.063915727 | 0.124734809 | C1orf216    |
| ENSG00000288096 | 17.6567342  | 6.072931576 | 1.536300371  | 0.063925298 | 0.124744116 | AC109322.2  |
| ENSG00000267278 | 28.74318712 | 64.1646251  | -1.157430112 | 0.063960026 | 0.124802511 | MAP3K14-AS1 |
| ENSG00000227963 | 3.928036872 | 11.29230146 | -1.527883675 | 0.063973707 | 0.124819832 | RBM15-AS1   |
| ENSG00000226133 | 3.344062475 | 0           | 4.074724623  | 0.064006155 | 0.124864387 | AL356289.1  |
| ENSG00000238015 | 3.344062475 | 0           | 4.074724623  | 0.064006155 | 0.124864387 | AC104837.2  |
| ENSG00000159210 | 743.4540452 | 960.0008176 | -0.368995886 | 0.064016516 | 0.124875224 | SNF8        |
| ENSG00000240350 | 0.293240848 | 4.085949533 | -3.643254329 | 0.064030953 | 0.124894009 | AC017002.3  |
| ENSG00000122643 | 391.8633188 | 268.4408552 | 0.544761682  | 0.06408572  | 0.124985579 | NT5C3A      |
| ENSG00000173041 | 199.8590477 | 137.4999465 | 0.538311882  | 0.064087521 | 0.124985579 | ZNF680      |
| ENSG00000231119 | 6.065144898 | 16.46092066 | -1.446987927 | 0.064094285 | 0.124989389 | AL031666.1  |
| ENSG00000257923 | 2005.144903 | 1481.026339 | 0.437166447  | 0.064101298 | 0.124993683 | CUX1        |
| ENSG00000229124 | 51.12640668 | 26.56648255 | 0.947828034  | 0.064108143 | 0.124997649 | VIM-AS1     |
| ENSG00000170279 | 3.33904788  | 0           | 4.072789161  | 0.0641367   | 0.125018137 | C7orf33     |
| ENSG00000286957 | 3.33904788  | 0           | 4.072789161  | 0.0641367   | 0.125018137 | AC079776.5  |
| ENSG00000285838 | 3.33904788  | 0           | 4.072789161  | 0.0641367   | 0.125018137 | AL646090.2  |
| ENSG00000175787 | 93.33144852 | 61.36049513 | 0.607345875  | 0.064137899 | 0.125018137 | ZNF169      |
| ENSG00000271614 | 78.22229362 | 42.7603404  | 0.87517643   | 0.064160467 | 0.125044663 | ATP2B1-AS1  |
| ENSG00000223060 | 0.293240848 | 3.597227584 | -3.465722689 | 0.064161133 | 0.125044663 | RF00019     |
| ENSG00000255241 | 3.589450856 | 0           | 4.179056936  | 0.064215739 | 0.125140159 | AP005436.2  |
| ENSG00000166411 | 301.1636582 | 419.6604495 | -0.479471234 | 0.064219766 | 0.125140159 | IDH3A       |
| ENSG00000144744 | 1049.575503 | 1321.92297  | -0.33292536  | 0.064240258 | 0.125170702 | UBA3        |
| ENSG00000240505 | 5.853747575 | 0           | 4.882143265  | 0.064272639 | 0.125224405 | TNFRSF13B   |
| novel.708       | 818.3334044 | 1381.801822 | -0.75559603  | 0.064334482 | 0.125335497 | -           |
| ENSG00000265366 | 10.36325155 | 3.210006989 | 1.684677316  | 0.064359516 | 0.125374865 | GLUD1P2     |
| ENSG00000163132 | 121.6538063 | 68.15467708 | 0.837087535  | 0.064391145 | 0.125427076 | MSX1        |
| ENSG00000226747 | 7.767890705 | 1.00940975  | 2.90213689   | 0.064420112 | 0.125474093 | FSIP2-AS2   |
| ENSG00000272417 | 6.34327069  | 1.110911105 | 2.539537428  | 0.064452496 | 0.125527759 | AC034229.4  |
| ENSG00000133627 | 101.8725722 | 147.1024967 | -0.530371239 | 0.064493145 | 0.125597511 | ACTR3B      |
| ENSG00000196367 | 1060.181766 | 1486.416509 | -0.487366462 | 0.064504979 | 0.125611141 | TRRAP       |
| ENSG00000106605 | 555.9881127 | 796.4542713 | -0.51891651  | 0.064521909 | 0.125634694 | BLVRA       |
| ENSG00000178718 | 299.1900947 | 211.4024684 | 0.501616561  | 0.064532106 | 0.125645133 | RPP25       |
| ENSG00000260417 | 0           | 3.179325408 | -4.252667541 | 0.064537716 | 0.12564664  | AC092127.1  |
| ENSG00000168894 | 843.2509225 | 1174.681917 | -0.478201948 | 0.064547275 | 0.125655834 | RNF181      |
| ENSG00000246089 | 70.29963395 | 101.3067351 | -0.527166705 | 0.064560339 | 0.125671849 | AC016065.1  |
| ENSG00000178342 | 12.45619678 | 38.20154688 | -1.619979735 | 0.064586033 | 0.125701211 | KCNG2       |
| ENSG00000240535 | 5.537869779 | 0           | 4.802110773  | 0.06458645  | 0.125701211 | AC034238.1  |
| ENSG00000230499 | 2.098031101 | 9.822411193 | -2.219555574 | 0.064589938 | 0.125701211 | AC108463.2  |
| ENSG00000100324 | 857.8134162 | 656.496832  | 0.385960362  | 0.064663425 | 0.125834803 | TAB1        |
| ENSG00000152795 | 7676.938146 | 5671.980309 | 0.436684706  | 0.064698937 | 0.125894479 | HNRNPDL     |
| ENSG00000259363 | 81.32529848 | 47.51002994 | 0.775407828  | 0.064704506 | 0.125895886 | AC090825.1  |
| ENSG00000217648 | 22.09574875 | 10.3029608  | 1.09525067   | 0.064731993 | 0.125939935 | AL136116.3  |
| ENSG00000185839 | 27.63988678 | 46.07326141 | -0.737526795 | 0.064760102 | 0.125985189 | AL035411.1  |
| ENSG00000254013 | 1.21705491  | 5.757686631 | -2.245200287 | 0.064770534 | 0.125996049 | MAP2K1P1    |
| ENSG00000189366 | 13.84188242 | 4.351599676 | 1.676155162  | 0.064827791 | 0.126097988 | ALG1L       |
| ENSG00000149609 | 2.094270155 | 10.35242721 | -2.295029251 | 0.064944575 | 0.126315691 | C20orf144   |
| ENSG00000232878 | 7.634647232 | 1.069617038 | 2.828665595  | 0.064958598 | 0.126333509 | DPYD-AS1    |
| ENSG00000238290 | 0.600343103 | 4.778958462 | -2.979195706 | 0.064964164 | 0.126334876 | AL034417.2  |
| ENSG00000261447 | 5.186676005 | 0.693008929 | 2.869567349  | 0.064974906 | 0.126346309 | AL162412.1  |

|                 |             |             |              |             |             |            |
|-----------------|-------------|-------------|--------------|-------------|-------------|------------|
| ENSG00000176399 | 7.937988541 | 1.396630344 | 2.48727455   | 0.065007227 | 0.12639955  | DMRTA1     |
| ENSG00000100253 | 0           | 3.352802412 | -4.320839963 | 0.06501728  | 0.12639955  | MIOX       |
| ENSG00000262668 | 0           | 3.352802412 | -4.320839963 | 0.06501728  | 0.12639955  | AJ003147.2 |
| ENSG00000160808 | 9.803167748 | 1.456837632 | 2.756708139  | 0.065021746 | 0.12639955  | MYL3       |
| ENSG00000214189 | 4.528379975 | 12.84948457 | -1.504938001 | 0.065036324 | 0.126418429 | ZNF788P    |
| ENSG00000142655 | 357.8283063 | 504.6058862 | -0.495810338 | 0.065049746 | 0.12643506  | PEX14      |
| ENSG00000180332 | 63.19827318 | 13.602444   | 2.221174866  | 0.0650621   | 0.126449613 | KCTD4      |
| ENSG00000183458 | 24.83911212 | 55.20980853 | -1.149697525 | 0.065085847 | 0.126486304 | AC138932.1 |
| ENSG00000279166 | 9.218979887 | 1.518200796 | 2.637053516  | 0.065126737 | 0.126556301 | AC009951.1 |
| ENSG00000197948 | 450.2654589 | 651.7108915 | -0.533021086 | 0.06515026  | 0.1265849   | FCHSD1     |
| ENSG00000174227 | 917.2117107 | 1218.766059 | -0.410140638 | 0.065151198 | 0.1265849   | PIGG       |
| ENSG00000157764 | 563.1897382 | 374.7169524 | 0.588265363  | 0.065186623 | 0.126644257 | BRAF       |
| ENSG00000235189 | 3.298717306 | 0           | 4.057063864  | 0.065203503 | 0.126658109 | AL034405.1 |
| ENSG00000239504 | 3.298717306 | 0           | 4.057063864  | 0.065203503 | 0.126658109 | RN7SL583P  |
| ENSG00000197272 | 5.541630725 | 0           | 4.803055492  | 0.06522134  | 0.126683285 | IL27       |
| ENSG00000131759 | 602.9738461 | 861.6387178 | -0.514722355 | 0.065227583 | 0.126685411 | RARA       |
| ENSG00000182508 | 3.297463658 | 0           | 4.056575521  | 0.065237062 | 0.126685411 | LHFPL1     |
| ENSG00000225885 | 3.297463658 | 0           | 4.056575521  | 0.065237062 | 0.126685411 | AC023590.1 |
| ENSG00000250220 | 17.62908265 | 6.765940506 | 1.376421448  | 0.065278394 | 0.126756199 | AC053527.1 |
| ENSG00000229205 | 5.53661613  | 0           | 4.801803559  | 0.065310119 | 0.126808326 | LINC00200  |
| ENSG00000230836 | 0.308355904 | 6.103484764 | -4.223608903 | 0.065330124 | 0.126837688 | LINC01293  |
| novel.578       | 14.3291117  | 4.769501852 | 1.597574775  | 0.06534309  | 0.126847172 | -          |
| ENSG00000198586 | 659.3479439 | 501.9068876 | 0.393522738  | 0.065344773 | 0.126847172 | TLK1       |
| ENSG00000215595 | 3.856222538 | 0           | 4.283209134  | 0.065365551 | 0.126878025 | C20orf202  |
| ENSG00000253598 | 9.904998732 | 2.598430319 | 1.953309479  | 0.065411458 | 0.126957649 | SLC10A5    |
| ENSG00000101365 | 1084.813895 | 1418.725995 | -0.38726489  | 0.065434452 | 0.126992792 | IDH3B      |
| novel.2         | 15.26309749 | 3.557089392 | 2.096897689  | 0.065443607 | 0.127001073 | -          |
| ENSG00000169760 | 147.3355304 | 75.86460143 | 0.955229983  | 0.065449032 | 0.127002113 | NLGN1      |
| ENSG00000196511 | 25.81113465 | 10.86378679 | 1.238155499  | 0.065457514 | 0.127009086 | TPK1       |
| ENSG00000164970 | 635.9902383 | 1021.410133 | -0.683170374 | 0.065480099 | 0.127043421 | FAM219A    |
| ENSG00000237863 | 5.779497215 | 0           | 4.864411982  | 0.065511784 | 0.127095405 | AL035425.1 |
| ENSG00000240253 | 5.842393466 | 0.387220594 | 3.917033898  | 0.06557821  | 0.127214775 | FAR2P3     |
| ENSG00000167778 | 1364.148218 | 1892.810695 | -0.472428096 | 0.065587209 | 0.127221506 | SPRYD3     |
| novel.192       | 26.09810726 | 12.03593267 | 1.12343274   | 0.065591474 | 0.127221506 | -          |
| ENSG00000271551 | 7.272099347 | 1.823989131 | 2.007797847  | 0.065602698 | 0.127230617 | AL355297.4 |
| ENSG00000234380 | 46.00925117 | 16.67337998 | 1.461242637  | 0.065605965 | 0.127230617 | LINC01426  |
| ENSG00000237352 | 15.19873378 | 6.164976321 | 1.30682244   | 0.065616131 | 0.127240835 | LINC01358  |
| ENSG00000236390 | 0           | 3.139187216 | -4.236368356 | 0.065716713 | 0.127419578 | AC092800.1 |
| ENSG00000128394 | 188.3756008 | 133.0726468 | 0.501643037  | 0.065718115 | 0.127419578 | APOBEC3F   |
| ENSG00000253948 | 49.90287006 | 31.02086785 | 0.68852401   | 0.06577984  | 0.127529737 | AC104986.2 |
| ENSG00000213453 | 0.307102255 | 5.593537843 | -4.09922259  | 0.065790621 | 0.127540842 | FTH1P3     |
| ENSG00000185515 | 328.6633216 | 448.434627  | -0.448689893 | 0.065796654 | 0.127540842 | BRCC3      |
| ENSG00000248757 | 3.675126598 | 0           | 4.210140086  | 0.065805203 | 0.127540842 | LINC02115  |
| ENSG00000214772 | 3.675126598 | 0           | 4.210140086  | 0.065805203 | 0.127540842 | AC010168.1 |
| ENSG00000111802 | 606.2618354 | 794.9509897 | -0.391200362 | 0.065847196 | 0.12761271  | TDP2       |
| ENSG00000113161 | 563.0743309 | 843.1100369 | -0.582507532 | 0.065872531 | 0.127652288 | HMGCR      |
| ENSG00000110492 | 2089.08093  | 1298.008837 | 0.68638877   | 0.065883124 | 0.127656923 | MDK        |
| ENSG00000188996 | 3.957013336 | 0.356539013 | 3.35519748   | 0.065884749 | 0.127656923 | HUS1B      |
| ENSG00000243155 | 17.83790141 | 8.254615595 | 1.112109533  | 0.065893549 | 0.127664452 | AL162431.2 |
| ENSG00000254337 | 0           | 24.43122968 | -7.191993286 | 0.065905846 | 0.127678755 | AC083967.1 |
| ENSG00000125449 | 235.0313238 | 138.1923603 | 0.764253692  | 0.065986053 | 0.127824608 | ARMC7      |

|                 |             |             |              |             |             |            |
|-----------------|-------------|-------------|--------------|-------------|-------------|------------|
| ENSG00000159461 | 1982.37029  | 1497.9052   | 0.404083983  | 0.065996258 | 0.127828954 | AMFR       |
| ENSG00000166484 | 454.0611503 | 676.1262092 | -0.574021363 | 0.065998137 | 0.127828954 | MAPK7      |
| ENSG00000237437 | 9.613011533 | 2.853467977 | 1.750007527  | 0.06601322  | 0.127848637 | ASS1P12    |
| ENSG00000285812 | 0.879722543 | 8.130604999 | -3.187076295 | 0.066058558 | 0.127926907 | AL390719.3 |
| ENSG00000268670 | 2.3900183   | 12.704249   | -2.403911782 | 0.066088408 | 0.127975176 | AC016586.2 |
| ENSG00000259838 | 23.41957797 | 48.18870197 | -1.03657067  | 0.066137052 | 0.128059827 | ELOCP2     |
| ENSG00000130997 | 66.51053933 | 32.35973105 | 1.038531107  | 0.066196287 | 0.12816497  | POLN       |
| ENSG00000277831 | 7.265831103 | 1.487519214 | 2.313971859  | 0.066214801 | 0.128187433 | AL138960.1 |
| ENSG00000198369 | 1183.092197 | 814.6519095 | 0.538099514  | 0.066217757 | 0.128187433 | SPRED2     |
| ENSG00000137673 | 0.894837599 | 5.451898296 | -2.591843411 | 0.066224278 | 0.128190505 | MMP7       |
| ENSG00000132541 | 261.6826338 | 386.42383   | -0.562660646 | 0.066244962 | 0.128220992 | RIDA       |
| ENSG00000215790 | 284.4366225 | 197.2473708 | 0.529031063  | 0.066250148 | 0.128221476 | SLC35E2A   |
| ENSG00000286417 | 3.653672027 | 0           | 4.202384263  | 0.066345195 | 0.128395867 | AL133334.1 |
| ENSG00000274210 | 4.53339457  | 0.356539013 | 3.55280587   | 0.066354944 | 0.128405169 | RF00003    |
| ENSG00000005469 | 307.4093296 | 227.5193888 | 0.433163815  | 0.066377238 | 0.128438744 | CROT       |
| ENSG00000255277 | 0.308355904 | 3.647978261 | -3.482515313 | 0.066404758 | 0.128482427 | ABCC6P2    |
| ENSG00000185834 | 117.2498946 | 174.2663946 | -0.571886239 | 0.066486333 | 0.128630681 | RPL12P4    |
| ENSG00000147251 | 262.8659111 | 398.8785167 | -0.601728379 | 0.066528184 | 0.128702067 | DOCK11     |
| ENSG00000079387 | 257.3046211 | 353.5723417 | -0.459258503 | 0.066537192 | 0.128709909 | SENP1      |
| ENSG00000175106 | 81.30828904 | 119.7305875 | -0.556349985 | 0.066566842 | 0.128749573 | TVP23C     |
| ENSG00000270919 | 3.644896486 | 0           | 4.199219402  | 0.066567607 | 0.128749573 | AC108451.2 |
| ENSG00000102837 | 28.5730462  | 0           | 7.170137094  | 0.06665576  | 0.128910474 | OLFM4      |
| ENSG00000285955 | 7.551478787 | 1.4981317   | 2.364494742  | 0.066663866 | 0.128916554 | BX842242.1 |
| ENSG00000126709 | 6984.384525 | 12117.01958 | -0.794830844 | 0.066700864 | 0.128977048 | IFI6       |
| ENSG00000158483 | 43.05342282 | 72.57162112 | -0.753567616 | 0.066705076 | 0.128977048 | FAM86C1    |
| ENSG00000120254 | 754.6629138 | 1123.807564 | -0.574807285 | 0.066722408 | 0.129000958 | MTHFD1L    |
| ENSG00000115540 | 404.7921284 | 543.0902798 | -0.424213732 | 0.066740338 | 0.129026023 | MOB4       |
| ENSG00000187726 | 5.71771207  | 0.713078025 | 2.997758212  | 0.066774604 | 0.129082663 | DNAJB13    |
| ENSG00000101004 | 233.8995171 | 326.4274857 | -0.480709348 | 0.066788309 | 0.129099551 | NINL       |
| ENSG00000248208 | 10.0272441  | 1.844058227 | 2.457122509  | 0.066815103 | 0.129141735 | WDR45P1    |
| ENSG00000142166 | 1729.379958 | 1326.987917 | 0.381860495  | 0.066860644 | 0.129212258 | IFNAR1     |
| ENSG00000173918 | 1046.761927 | 2909.985677 | -1.475061794 | 0.066861537 | 0.129212258 | C1QTNF1    |
| ENSG00000156374 | 213.5235673 | 293.0173548 | -0.45617569  | 0.06690333  | 0.129283408 | PCGF6      |
| ENSG00000224536 | 25.05713369 | 10.987669   | 1.184768372  | 0.066917329 | 0.129300842 | AC096677.1 |
| ENSG00000176055 | 207.9188544 | 142.1032446 | 0.547508925  | 0.067002197 | 0.129454837 | MBLAC2     |
| novel.16        | 0.921306765 | 6.512058724 | -2.829274343 | 0.067006991 | 0.129454837 | -          |
| ENSG00000225871 | 1.218308559 | 6.501446238 | -2.418526324 | 0.067020891 | 0.129472063 | AC245100.2 |
| ENSG00000185246 | 946.893658  | 646.9277419 | 0.549803385  | 0.067037414 | 0.129494354 | PRPF39     |
| ENSG00000273045 | 8.163176    | 2.089639274 | 1.944467638  | 0.067061048 | 0.129530375 | C2orf15    |
| ENSG00000108773 | 1619.96829  | 1219.973126 | 0.409261381  | 0.067076621 | 0.129550825 | KAT2A      |
| ENSG00000116209 | 4252.981106 | 3221.882918 | 0.400549907  | 0.067144396 | 0.129672084 | TMEM59     |
| ENSG00000268926 | 28.31232895 | 0           | 7.156904667  | 0.067161565 | 0.129695602 | AL354861.3 |
| ENSG00000224712 | 7.581780171 | 0.774441189 | 3.342540547  | 0.067262941 | 0.129881714 | NPIPA3     |
| ENSG00000139926 | 3160.28142  | 1924.51351  | 0.715702533  | 0.067313259 | 0.129969216 | FRMD6      |
| ENSG00000239300 | 14.3187265  | 4.351599676 | 1.725956592  | 0.067323074 | 0.129978508 | AC080162.1 |
| ENSG00000274307 | 5.185422356 | 0.693008929 | 2.869715739  | 0.067339782 | 0.130001105 | AC023449.2 |
| ENSG00000239246 | 1.801029308 | 7.979508841 | -2.139553754 | 0.067372712 | 0.130055014 | AC008026.1 |
| ENSG00000230869 | 16.96290872 | 4.769501852 | 1.841608608  | 0.067456678 | 0.130207426 | AGAP10P    |
| ENSG00000268798 | 4.863205045 | 14.3263913  | -1.56120776  | 0.067468026 | 0.130219655 | AC027307.3 |
| ENSG00000054523 | 1629.87463  | 1141.064613 | 0.514477499  | 0.067474582 | 0.130222635 | KIF1B      |
| ENSG00000214282 | 0           | 4.849778236 | -4.856163815 | 0.067497447 | 0.130247414 | KRT8P14    |



|                 |             |             |              |             |             |              |
|-----------------|-------------|-------------|--------------|-------------|-------------|--------------|
| ENSG00000147571 | 0           | 4.849778236 | -4.856163815 | 0.067497447 | 0.130247414 | CRH          |
| ENSG00000100068 | 61.25895797 | 108.6894365 | -0.828752583 | 0.067515899 | 0.130273344 | LRP5L        |
| ENSG00000271828 | 10.24358475 | 2.455634897 | 2.047311192  | 0.067524222 | 0.130275186 | AC008937.3   |
| ENSG00000139714 | 9.114712877 | 2.598430319 | 1.832864808  | 0.067528621 | 0.130275186 | MORN3        |
| ENSG00000179636 | 3.940644631 | 0.356539013 | 3.350117786  | 0.067531897 | 0.130275186 | TPPP2        |
| ENSG00000177144 | 7.298568513 | 1.753169357 | 2.038564557  | 0.067557412 | 0.130314732 | NUDT4B       |
| ENSG00000177628 | 55.84108317 | 17.58231585 | 1.668098719  | 0.067579993 | 0.130348612 | GBA          |
| ENSG00000140993 | 40.37059095 | 20.68735386 | 0.961844975  | 0.067586877 | 0.130352212 | TIGD7        |
| ENSG00000188585 | 5.466055445 | 0.672939833 | 2.965482184  | 0.067601788 | 0.130371293 | CLEC20A      |
| ENSG00000106299 | 1308.228726 | 973.3386127 | 0.426595887  | 0.067611676 | 0.130380684 | WASL         |
| ENSG00000147117 | 9.079396899 | 1.733100261 | 2.368538695  | 0.067640819 | 0.130427202 | ZNF157       |
| ENSG00000224905 | 23.81006213 | 9.498993907 | 1.316450991  | 0.067706352 | 0.130543876 | AP001347.1   |
| ENSG00000279030 | 0           | 4.880459818 | -4.864809708 | 0.067774465 | 0.130665506 | AC007336.3   |
| ENSG00000161960 | 128.7268751 | 218.337776  | -0.761608317 | 0.06778682  | 0.130679629 | EIF4A1       |
| ENSG00000183617 | 502.1599258 | 675.9194005 | -0.428827834 | 0.06785058  | 0.130780276 | MRPL54       |
| ENSG00000177721 | 61.85213484 | 25.72738615 | 1.259701968  | 0.067851596 | 0.130780276 | ANXA2R       |
| ENSG00000276851 | 1.846374476 | 8.437549209 | -2.196754264 | 0.067854129 | 0.130780276 | AC002401.4   |
| ENSG00000232692 | 0.293240848 | 5.483864147 | -4.079535432 | 0.067884557 | 0.130829217 | AP001596.1   |
| ENSG00000018610 | 391.3391914 | 283.1687912 | 0.467143337  | 0.067915597 | 0.13087933  | CXorf56      |
| ENSG00000281706 | 3.04831433  | 9.334845119 | -1.618935996 | 0.067940381 | 0.130912774 | AL009179.1   |
| ENSG00000274373 | 6.144552397 | 0           | 4.952329127  | 0.067944343 | 0.130912774 | AC148476.1   |
| ENSG00000269867 | 23.27129071 | 50.86385984 | -1.126275837 | 0.067956786 | 0.130912774 | AC010326.3   |
| ENSG00000234036 | 0           | 3.250145181 | -4.280919575 | 0.067958845 | 0.130912774 | TXNP6        |
| ENSG00000231535 | 27.90623118 | 0           | 7.13617668   | 0.067960253 | 0.130912774 | LINC00278    |
| ENSG00000262075 | 10.29394451 | 22.95979836 | -1.153363558 | 0.067963184 | 0.130912774 | DKFZP434A062 |
| ENSG00000260439 | 12.25873214 | 1.782695063 | 2.776788207  | 0.068007283 | 0.1309845   | LMF1-AS1     |
| ENSG00000266368 | 3.912921816 | 0.356539013 | 3.341451984  | 0.068010504 | 0.1309845   | AC005410.2   |
| ENSG00000228768 | 0.308355904 | 3.872334337 | -3.576885794 | 0.068021256 | 0.130995497 | AC003101.1   |
| ENSG00000172752 | 0           | 23.51677154 | -7.136320178 | 0.068037955 | 0.131017944 | COL6A5       |
| ENSG00000275832 | 187.056572  | 333.6326815 | -0.834999037 | 0.068095138 | 0.131118342 | ARHGAP23     |
| ENSG00000259772 | 5.384140649 | 0           | 4.763163508  | 0.068102297 | 0.131122408 | AC012236.1   |
| ENSG00000241544 | 0           | 4.819096654 | -4.847498303 | 0.068153598 | 0.131211459 | LINC02029    |
| ENSG00000259291 | 106.7022566 | 56.89904619 | 0.909763538  | 0.068171142 | 0.13123551  | ZNF710-AS1   |
| ENSG00000152056 | 73.93736455 | 31.23016351 | 1.238118508  | 0.068218149 | 0.131316273 | AP1S3        |
| ENSG00000164898 | 13.53220159 | 4.993857928 | 1.436315177  | 0.068292538 | 0.131449729 | FMC1         |
| ENSG00000171126 | 5.83870379  | 0           | 4.878597903  | 0.068311797 | 0.131477058 | KCNG3        |
| ENSG00000261216 | 0           | 2.904218654 | -4.117182652 | 0.068347964 | 0.131527179 | AC007216.2   |
| ENSG00000123407 | 0           | 2.904218654 | -4.117182652 | 0.068347964 | 0.131527179 | HOXC12       |
| ENSG00000172943 | 509.810772  | 393.7502925 | 0.373149496  | 0.068359554 | 0.131536715 | PHF8         |
| ENSG00000269971 | 3.575589449 | 0           | 4.173909015  | 0.068368107 | 0.131536715 | AL020997.2   |
| ENSG00000185031 | 3.575589449 | 0           | 4.173909015  | 0.068368107 | 0.131536715 | SLC2A3P2     |
| ENSG00000169727 | 1872.600091 | 2444.501217 | -0.38448203  | 0.068383338 | 0.131556276 | GPS1         |
| ENSG00000273061 | 16.31757646 | 5.12488499  | 1.679546104  | 0.06840102  | 0.131580549 | CDC37L1-DT   |
| ENSG00000172156 | 5.534108833 | 0           | 4.801200931  | 0.068443294 | 0.131652123 | CCL11        |
| ENSG00000180543 | 295.886746  | 557.4219362 | -0.914115274 | 0.06846637  | 0.131686761 | TSPYL5       |
| ENSG00000196458 | 339.0711073 | 510.5907754 | -0.590068866 | 0.068482542 | 0.131708114 | ZNF605       |
| ENSG00000232888 | 5.133737672 | 14.42904853 | -1.488533653 | 0.068488495 | 0.131709814 | RPS11P5      |
| ENSG00000276900 | 35.65065857 | 17.05700455 | 1.067524189  | 0.068504842 | 0.1317315   | AC023157.3   |
| ENSG00000135912 | 626.8727924 | 394.1286172 | 0.669569611  | 0.068557135 | 0.1318223   | TTLL4        |
| ENSG00000134086 | 641.7453456 | 927.1035964 | -0.530346114 | 0.068591428 | 0.13187278  | VHL          |
| ENSG00000235448 | 4.488049402 | 0.387220594 | 3.539898506  | 0.068593539 | 0.13187278  | LURAP1L-AS1  |

|                 |             |             |              |             |             |              |
|-----------------|-------------|-------------|--------------|-------------|-------------|--------------|
| ENSG00000110777 | 12.33423615 | 0.336469917 | 4.996084524  | 0.068605613 | 0.131886233 | POU2AF1      |
| ENSG00000216775 | 125.4793722 | 235.2344974 | -0.907384769 | 0.068667609 | 0.131992918 | AL109918.1   |
| ENSG00000185630 | 722.5257734 | 496.0681883 | 0.542758243  | 0.06867127  | 0.131992918 | PBX1         |
| ENSG00000102763 | 326.4268187 | 464.5750028 | -0.509840738 | 0.068770752 | 0.132174354 | VWA8         |
| ENSG00000115718 | 7.309922623 | 1.487519214 | 2.32094032   | 0.068828413 | 0.13227539  | PROC         |
| ENSG00000259075 | 7.857327394 | 2.140389951 | 1.872380818  | 0.068840388 | 0.132288618 | POC1B-GALNT4 |
| ENSG00000144857 | 267.4340063 | 81.68498267 | 1.70995549   | 0.068865408 | 0.132326912 | BOC          |
| ENSG00000280537 | 1.54052587  | 7.876851611 | -2.36507514  | 0.068872599 | 0.132330941 | AC068946.1   |
| ENSG00000273820 | 109.4904238 | 62.27071528 | 0.815072644  | 0.068902579 | 0.132378754 | USP27X       |
| ENSG00000175894 | 1.215801261 | 6.266477676 | -2.361458571 | 0.068919427 | 0.132396721 | TSPEAR       |
| ENSG00000267565 | 12.31138574 | 3.852265241 | 1.663646523  | 0.068922122 | 0.132396721 | AC011477.3   |
| ENSG00000144224 | 2735.363994 | 2198.636881 | 0.315121656  | 0.068928264 | 0.13239873  | UBXN4        |
| ENSG00000148943 | 656.3411584 | 478.6280856 | 0.455068653  | 0.069085003 | 0.132689987 | LIN7C        |
| ENSG00000039319 | 833.2380699 | 605.7189333 | 0.459909399  | 0.069104242 | 0.132717128 | ZFYVE16      |
| ENSG00000228300 | 489.6789408 | 689.4377281 | -0.493909539 | 0.069130272 | 0.132757307 | C19orf24     |
| ENSG00000268049 | 27.25685324 | 11.48469168 | 1.248466536  | 0.069193349 | 0.132867065 | AC012313.2   |
| ENSG00000228519 | 4.528379975 | 12.10803671 | -1.419756673 | 0.069197654 | 0.132867065 | AC097263.1   |
| ENSG00000007168 | 2361.112495 | 3019.741542 | -0.354908882 | 0.069236924 | 0.132932644 | PAFAH1B1     |
| ENSG00000185760 | 8.273995988 | 24.32715978 | -1.561603486 | 0.069260068 | 0.132967253 | KCNQ5        |
| novel.1003      | 6.947374739 | 16.89889193 | -1.286687313 | 0.069272166 | 0.132980651 | -            |
| ENSG00000280083 | 0.616711807 | 5.553399651 | -3.178790327 | 0.069279397 | 0.132984708 | AC079777.1   |
| ENSG00000184208 | 585.2383302 | 424.8220051 | 0.461444834  | 0.069295232 | 0.133005277 | C22orf46     |
| ENSG00000184984 | 13.9527024  | 5.289033778 | 1.388096992  | 0.069372885 | 0.133144487 | CHRM5        |
| ENSG00000188372 | 43.66533349 | 86.16516926 | -0.982989747 | 0.069394248 | 0.133175651 | ZP3          |
| ENSG00000011275 | 896.618222  | 1126.234324 | -0.328755322 | 0.069423411 | 0.13320844  | RNF216       |
| ENSG00000150459 | 2664.684075 | 2096.759389 | 0.345744252  | 0.069426639 | 0.13320844  | SAP18        |
| ENSG00000117281 | 20.71271296 | 8.529722348 | 1.274092541  | 0.069426715 | 0.13320844  | CD160        |
| ENSG00000232187 | 183.6632185 | 359.9779594 | -0.970219784 | 0.069439176 | 0.133222511 | FTH1P7       |
| ENSG00000224051 | 468.0490821 | 617.5136991 | -0.399643537 | 0.069471877 | 0.133274419 | CPTP         |
| ENSG00000139644 | 9138.472343 | 11516.82838 | -0.333720323 | 0.069476492 | 0.133274419 | TMBIM6       |
| ENSG00000241553 | 1718.930218 | 2326.042993 | -0.436380449 | 0.069516595 | 0.133341503 | ARPC4        |
| ENSG00000213640 | 8.023308277 | 0.723690511 | 3.478182314  | 0.069525531 | 0.133348798 | EEF1DP4      |
| ENSG00000167302 | 278.5278288 | 169.895659  | 0.714246262  | 0.069583703 | 0.13345052  | TEPSIN       |
| ENSG00000166902 | 758.0033297 | 985.9815251 | -0.379300334 | 0.069638009 | 0.133544812 | MRPL16       |
| ENSG00000109265 | 91.49588617 | 51.06840361 | 0.839638738  | 0.069669764 | 0.133595848 | KIAA1211     |
| ENSG00000048392 | 1257.575957 | 902.0670827 | 0.479626711  | 0.069690759 | 0.133626245 | RRM2B        |
| ENSG00000184752 | 716.0252275 | 965.3187008 | -0.431286777 | 0.069788022 | 0.133802862 | NDUFA12      |
| ENSG00000105677 | 1160.067395 | 1510.480944 | -0.380954306 | 0.069809058 | 0.133833319 | TMEM147      |
| ENSG00000233360 | 0.586481695 | 5.02453951  | -3.073007656 | 0.069843963 | 0.133890357 | Z83844.2     |
| ENSG00000186951 | 762.6224873 | 441.2160146 | 0.790030019  | 0.069865669 | 0.133922086 | PPARA        |
| ENSG00000196724 | 105.1243347 | 72.57850919 | 0.535281754  | 0.06987135  | 0.133923094 | ZNF418       |
| novel.1002      | 24.27311608 | 41.21158642 | -0.762285401 | 0.069908677 | 0.133984755 | -            |
| ENSG00000166192 | 44.09697495 | 69.179708   | -0.650518733 | 0.069928996 | 0.134013811 | SENPA8       |
| ENSG00000225880 | 52.08378487 | 26.44362783 | 0.984710668  | 0.069980501 | 0.134102626 | LINC00115    |
| ENSG00000231154 | 16.79442054 | 6.512058724 | 1.37304337   | 0.069992424 | 0.134115581 | MORF4L2-AS1  |
| novel.466       | 670.266209  | 485.6800496 | 0.464519641  | 0.069998894 | 0.134118088 | -            |
| ENSG00000053328 | 15.09690279 | 1.722487775 | 3.115262366  | 0.07010169  | 0.134305141 | METTL24      |
| ENSG00000214046 | 864.4597275 | 626.8125285 | 0.463259871  | 0.070185651 | 0.134456084 | SMIM7        |
| ENSG00000215154 | 47.79069282 | 87.80664432 | -0.875323053 | 0.070265665 | 0.134599442 | AC141586.1   |
| ENSG00000150776 | 506.7182515 | 643.5120821 | -0.345091049 | 0.070350378 | 0.134751782 | NKAPD1       |
| ENSG00000187266 | 327.0466232 | 187.8385766 | 0.801351267  | 0.070410946 | 0.134857854 | EPOR         |

|                 |             |             |              |             |             |             |
|-----------------|-------------|-------------|--------------|-------------|-------------|-------------|
| ENSG00000031691 | 119.8274906 | 171.7732713 | -0.520341242 | 0.070437441 | 0.134898655 | CENPQ       |
| ENSG00000164082 | 11.19637527 | 3.668047357 | 1.623365239  | 0.070443505 | 0.134900324 | GRM2        |
| novel.1102      | 3.359177531 | 0           | 4.080654925  | 0.0705023   | 0.134993017 | -           |
| ENSG00000089169 | 3.359177531 | 0           | 4.080654925  | 0.0705023   | 0.134993017 | RPH3A       |
| ENSG00000279149 | 7.657355452 | 1.41669944  | 2.423435391  | 0.07058832  | 0.135147575 | AL356750.1  |
| ENSG00000119599 | 128.7046933 | 208.3022292 | -0.695898029 | 0.070593424 | 0.135147575 | DCAF4       |
| ENSG00000074266 | 352.5042977 | 463.3144898 | -0.394827427 | 0.070686373 | 0.135307391 | EED         |
| ENSG00000267322 | 12.42478429 | 3.740023006 | 1.75425926   | 0.070687318 | 0.135307391 | SNHG22      |
| ENSG00000039650 | 626.474841  | 852.0109739 | -0.443570959 | 0.070696309 | 0.135314631 | PNKP        |
| ENSG00000161057 | 1638.584237 | 2199.053693 | -0.424575323 | 0.070777825 | 0.135452943 | PSMC2       |
| ENSG00000264924 | 4.45656564  | 0.387220594 | 3.530842055  | 0.070778998 | 0.135452943 | AC090772.1  |
| ENSG00000187944 | 19.05746361 | 7.327793979 | 1.388691001  | 0.07079647  | 0.1354764   | C2orf66     |
| ENSG00000277687 | 31.4630159  | 13.97100816 | 1.171987512  | 0.070829699 | 0.135530005 | AL139407.1  |
| ENSG00000253352 | 2838.053598 | 2108.381909 | 0.42880161   | 0.070837985 | 0.135535878 | TUG1        |
| ENSG00000166068 | 1759.152521 | 1248.815704 | 0.494419997  | 0.070861215 | 0.135570341 | SPRED1      |
| ENSG00000141428 | 164.6243458 | 223.3397251 | -0.440486044 | 0.070894391 | 0.135623826 | C18orf21    |
| ENSG00000176994 | 11.23921314 | 22.81713133 | -1.025328557 | 0.070924921 | 0.135672241 | SMCR8       |
| ENSG00000110900 | 184.0754409 | 49.88248159 | 1.881871863  | 0.070952731 | 0.135715445 | TSPAN11     |
| ENSG00000185222 | 1580.131422 | 2141.583765 | -0.438672513 | 0.071009336 | 0.13581372  | TCEAL9      |
| ENSG00000120337 | 16.19400617 | 3.822739535 | 2.071527298  | 0.07102792  | 0.135839264 | TNFSF18     |
| ENSG00000139797 | 0           | 3.149799701 | -4.240285351 | 0.071056085 | 0.135883125 | RNF113B     |
| ENSG00000185585 | 3137.534939 | 1530.222017 | 1.035746715  | 0.071071793 | 0.135903162 | OLFML2A     |
| ENSG00000234883 | 31.34893316 | 61.76174866 | -0.977095498 | 0.071085152 | 0.135918702 | MIR155HG    |
| novel.910       | 45.101592   | 7.358603955 | 2.612127469  | 0.071117529 | 0.135969637 | -           |
| ENSG00000143603 | 21.91583519 | 229.8608768 | -3.390715693 | 0.071122257 | 0.135969637 | KCNN3       |
| ENSG00000171204 | 950.6643588 | 743.6806109 | 0.354128715  | 0.071178267 | 0.136066702 | TMEM126B    |
| ENSG00000118495 | 627.5188156 | 1139.301207 | -0.860630132 | 0.071393829 | 0.136468736 | PLAGL1      |
| ENSG00000227253 | 10.49022678 | 2.261960402 | 2.240795361  | 0.071424299 | 0.136516935 | AL158834.2  |
| ENSG00000258818 | 10.57590252 | 2.587817834 | 2.047294554  | 0.071455756 | 0.136567015 | RNASE4      |
| ENSG00000198522 | 411.7674825 | 570.2220491 | -0.470116679 | 0.071465738 | 0.136576046 | GPN1        |
| ENSG00000172954 | 107.257824  | 155.4340495 | -0.53570486  | 0.071509286 | 0.136629671 | LCLAT1      |
| ENSG00000185761 | 53.57556028 | 101.0680421 | -0.915602757 | 0.071512589 | 0.136629671 | ADAMTSL5    |
| ENSG00000203546 | 21.33945396 | 7.634866584 | 1.468971216  | 0.07151647  | 0.136629671 | AL139353.1  |
| novel.728       | 21.16964086 | 4.788415073 | 2.15078369   | 0.071517173 | 0.136629671 | -           |
| novel.109       | 6.466413702 | 0           | 5.027958     | 0.071526745 | 0.136629671 | -           |
| ENSG00000260784 | 6.466413702 | 0           | 5.027958     | 0.071526745 | 0.136629671 | AC026150.2  |
| ENSG00000279089 | 27.56151946 | 10.65937142 | 1.379591873  | 0.07153061  | 0.136629671 | AC005839.1  |
| ENSG00000106536 | 26.20272992 | 0           | 7.045179571  | 0.071559784 | 0.136675347 | POU6F2      |
| ENSG00000125821 | 345.1357102 | 470.68178   | -0.447444714 | 0.071583714 | 0.136711002 | DTD1        |
| ENSG00000123104 | 612.8213595 | 376.3728116 | 0.703563096  | 0.071610801 | 0.13675268  | ITPR2       |
| ENSG00000286912 | 5.759296292 | 1.029478846 | 2.445669951  | 0.071625157 | 0.136770044 | AC006008.1  |
| ENSG00000183340 | 319.4963821 | 422.34086   | -0.402968097 | 0.071682005 | 0.13686497  | JRKL        |
| ENSG00000182376 | 0.586481695 | 7.999706332 | -3.754038299 | 0.071686766 | 0.13686497  | AC138028.1  |
| ENSG00000265096 | 0.925067711 | 8.099923417 | -3.137475413 | 0.071695529 | 0.13686497  | C1QTNF1-AS1 |
| ENSG00000282390 | 26.14130113 | 0           | 7.041804889  | 0.071696233 | 0.13686497  | AL392083.1  |
| ENSG00000122035 | 181.305252  | 67.36432357 | 1.426764773  | 0.071701209 | 0.13686497  | RASL11A     |
| ENSG00000250182 | 81.43952341 | 126.5353819 | -0.634968358 | 0.071786368 | 0.137017456 | EEF1A1P13   |
| ENSG00000168802 | 7.832111876 | 19.39222487 | -1.305928324 | 0.071797996 | 0.137029585 | CHTF8       |
| ENSG00000230647 | 0           | 4.941822981 | -4.882104734 | 0.071830429 | 0.137081415 | AC022816.1  |
| ENSG00000243547 | 107.3253791 | 160.9023397 | -0.583691731 | 0.071857841 | 0.137123656 | HNRNPKP4    |
| ENSG00000100373 | 5.353910537 | 0           | 4.755357664  | 0.071887729 | 0.137170401 | UPK3A       |

|                 |             |             |              |             |             |             |
|-----------------|-------------|-------------|--------------|-------------|-------------|-------------|
| ENSG00000224287 | 0.615458159 | 4.901813183 | -3.012568228 | 0.071892897 | 0.137170401 | MSL3P1      |
| ENSG00000162755 | 41.25282079 | 22.52195548 | 0.871246874  | 0.071939842 | 0.137249893 | KLHDC9      |
| ENSG00000079263 | 84.4050253  | 26.49078249 | 1.675183394  | 0.071970316 | 0.137297949 | SP140       |
| ENSG00000182952 | 1128.562395 | 1486.017269 | -0.397076021 | 0.071995116 | 0.137335177 | HMGNA4      |
| ENSG00000254317 | 5.71771207  | 0.774441189 | 2.946786091  | 0.072015723 | 0.137364401 | AC022973.4  |
| ENSG00000205085 | 104.9909212 | 48.31656538 | 1.119181266  | 0.072089759 | 0.137495524 | FAM71F2     |
| novel.1049      | 6.474220329 | 0           | 5.027653175  | 0.072098881 | 0.137502829 | -           |
| ENSG00000258057 | 22.50991005 | 10.25221012 | 1.126106562  | 0.072127187 | 0.137545055 | BCDIN3D-AS1 |
| ENSG00000177294 | 9.512220735 | 1.722487775 | 2.444227833  | 0.072135282 | 0.137545055 | FBXO39      |
| ENSG00000273951 | 4.851850935 | 0.743759607 | 2.737673112  | 0.072136905 | 0.137545055 | AL031667.3  |
| ENSG00000248275 | 232.0204924 | 133.3641454 | 0.799207573  | 0.072148204 | 0.137556504 | TRIM52-AS1  |
| ENSG00000198346 | 99.8361837  | 67.41104586 | 0.567484918  | 0.072207348 | 0.137659165 | ZNF813      |
| ENSG00000272650 | 11.24297409 | 3.944309986 | 1.509839638  | 0.072222053 | 0.137677097 | AC110792.3  |
| ENSG00000287564 | 6.099135957 | 1.060160428 | 2.510977206  | 0.07228658  | 0.137789995 | AL359546.1  |
| ENSG00000268520 | 2.094270155 | 9.75390317  | -2.212367999 | 0.072304288 | 0.137813638 | AC008750.5  |
| ENSG00000135519 | 23.59748243 | 8.16257085  | 1.52615337   | 0.072359    | 0.137907804 | KCNH3       |
| ENSG00000285527 | 5.232021173 | 0           | 4.720099465  | 0.072414808 | 0.138004043 | AC136285.3  |
| ENSG00000160221 | 446.2633142 | 302.6035604 | 0.560700336  | 0.072467863 | 0.138095024 | GATD3A      |
| ENSG00000250506 | 19.42635101 | 8.275840566 | 1.231998675  | 0.072495743 | 0.138138019 | CDK3        |
| ENSG00000232702 | 4.873305506 | 16.85502932 | -1.789287822 | 0.072517061 | 0.138168506 | AL158050.1  |
| novel.673       | 3.67387295  | 0           | 4.209770751  | 0.072532511 | 0.138187809 | -           |
| ENSG00000131652 | 423.4314003 | 609.1153422 | -0.524079409 | 0.072558183 | 0.138226584 | THOC6       |
| ENSG00000258645 | 4.585079253 | 13.05364315 | -1.511540789 | 0.072577169 | 0.138251445 | HSPE1P2     |
| ENSG00000173210 | 2506.238165 | 6177.523466 | -1.301475668 | 0.072581876 | 0.138251445 | ABLIM3      |
| ENSG00000120159 | 250.5892437 | 347.7429834 | -0.473502237 | 0.072594089 | 0.138264572 | CAAP1       |
| ENSG00000157954 | 1627.31857  | 2173.057288 | -0.417069319 | 0.072638392 | 0.138338812 | WIPI2       |
| ENSG00000178464 | 1320.12575  | 1762.420728 | -0.416873308 | 0.072660377 | 0.138370538 | RPL10P16    |
| ENSG00000224846 | 0.600343103 | 5.158006716 | -3.104984809 | 0.072674345 | 0.138386994 | AL133351.1  |
| ENSG00000138279 | 2229.290476 | 1550.254408 | 0.52386432   | 0.072705289 | 0.138435773 | ANXA7       |
| ENSG00000205853 | 9.640734348 | 2.822786395 | 1.76172943   | 0.072711736 | 0.138437903 | RFPL3S      |
| ENSG00000156162 | 769.7520107 | 543.5157117 | 0.50159162   | 0.072722554 | 0.138444477 | DPY19L4     |
| ENSG00000148735 | 3.28360225  | 0           | 4.05099631   | 0.072725847 | 0.138444477 | PLEKHS1     |
| ENSG00000114200 | 110.0466605 | 26.53263731 | 2.049564245  | 0.072741126 | 0.138463419 | BCHE        |
| ENSG00000083814 | 175.2211609 | 98.93412066 | 0.822728244  | 0.072816431 | 0.138596608 | ZNF671      |
| ENSG00000214650 | 14.38420132 | 5.044608606 | 1.515956468  | 0.072833337 | 0.138616248 | AC073592.1  |
| ENSG00000243056 | 19.93342521 | 8.926399553 | 1.156680791  | 0.072841576 | 0.138616248 | EIF4EBP3    |
| ENSG00000196782 | 297.1828965 | 183.4624127 | 0.697151837  | 0.072842756 | 0.138616248 | MAML3       |
| ENSG00000120210 | 3.970874743 | 0.336469917 | 3.359649189  | 0.072877773 | 0.138672728 | INSL6       |
| ENSG00000108828 | 4400.809468 | 6185.597836 | -0.491095041 | 0.072889638 | 0.138685147 | VAT1        |
| ENSG00000272983 | 47.82697771 | 17.33198291 | 1.46989417   | 0.072915245 | 0.138723709 | AL117339.4  |
| ENSG00000218283 | 890.2186195 | 1260.360372 | -0.501690914 | 0.073009861 | 0.138880863 | MORF4L1P1   |
| ENSG00000149452 | 5.229513876 | 0           | 4.719442062  | 0.073013883 | 0.138880863 | SLC22A8     |
| ENSG00000226767 | 5.229513876 | 0           | 4.719442062  | 0.073013883 | 0.138880863 | AC114501.1  |
| ENSG00000242588 | 70.43356161 | 34.0844834  | 1.04967389   | 0.073031364 | 0.138903944 | AC108010.1  |
| ENSG00000262576 | 39.79922396 | 13.30739654 | 1.585621149  | 0.073037528 | 0.138905499 | PCDHGA4     |
| ENSG00000006015 | 1294.420406 | 940.2567244 | 0.460983292  | 0.073052385 | 0.138923584 | REX1BD      |
| ENSG00000286882 | 3.034452922 | 0           | 3.934800073  | 0.07315216  | 0.139082786 | AC116428.1  |
| ENSG00000279137 | 3.034452922 | 0           | 3.934800073  | 0.07315216  | 0.139082786 | AL356309.3  |
| ENSG00000167880 | 3.034452922 | 0           | 3.934800073  | 0.07315216  | 0.139082786 | EVPL        |
| ENSG00000112343 | 671.910318  | 873.3626969 | -0.378239843 | 0.073162551 | 0.139092363 | TRIM38      |
| ENSG00000185883 | 55.34106015 | 92.17746119 | -0.73651771  | 0.073171765 | 0.139099702 | ATP6V0C     |

|                 |             |             |              |             |             |            |
|-----------------|-------------|-------------|--------------|-------------|-------------|------------|
| ENSG00000166471 | 532.0113298 | 776.8163932 | -0.545651018 | 0.073214185 | 0.139170159 | TMEM41B    |
| ENSG00000164061 | 30.48536586 | 12.19905398 | 1.312470147  | 0.07325124  | 0.13923041  | BSN        |
| ENSG00000287875 | 10.15694009 | 1.130980201 | 3.190727058  | 0.073264924 | 0.139246232 | AC068193.1 |
| ENSG00000233196 | 5.435825332 | 1.080229524 | 2.334825142  | 0.073359284 | 0.139415372 | AL096803.3 |
| ENSG00000124098 | 1928.625528 | 1415.128553 | 0.446837795  | 0.073369868 | 0.139425288 | FAM210B    |
| ENSG00000154645 | 7.974486897 | 1.00940975  | 2.939883068  | 0.073377443 | 0.139429484 | CHODL      |
| ENSG00000131943 | 726.367895  | 555.9361683 | 0.385821942  | 0.073437375 | 0.13953316  | C19orf12   |
| ENSG00000122756 | 16.61604536 | 2.52645467  | 2.71779556   | 0.073480476 | 0.139604844 | CNTFR      |
| ENSG00000186834 | 1851.845877 | 1371.470197 | 0.432989068  | 0.073505953 | 0.139643036 | HEXIM1     |
| ENSG00000120913 | 1317.096099 | 977.6788211 | 0.429620048  | 0.073578052 | 0.139769786 | PDLIM2     |
| ENSG00000259932 | 3.019337866 | 0           | 3.928409547  | 0.07363971  | 0.139876685 | AC051619.7 |
| ENSG00000287799 | 7.18140901  | 1.386017859 | 2.350193303  | 0.073687794 | 0.139957788 | AC005014.4 |
| novel.817       | 4.266622888 | 12.45511911 | -1.550976834 | 0.073724139 | 0.140016583 | -          |
| ENSG00000230747 | 5.423217574 | 0.713078025 | 2.921287331  | 0.073735785 | 0.140028465 | AC021188.1 |
| ENSG00000249859 | 170.7714489 | 266.1406704 | -0.63894241  | 0.07380558  | 0.140150765 | PVT1       |
| ENSG00000188365 | 9.110951931 | 2.537067156 | 1.849817145  | 0.073887275 | 0.140295643 | AC092171.1 |
| ENSG00000271947 | 0.586481695 | 6.03266499  | -3.333543803 | 0.073922102 | 0.140351514 | AC017076.1 |
| ENSG00000181896 | 197.108775  | 136.1162404 | 0.533047381  | 0.073954533 | 0.14040283  | ZNF101     |
| ENSG00000283118 | 3.915429114 | 0.336469917 | 3.342159252  | 0.073967317 | 0.14041684  | AC009951.2 |
| ENSG00000187091 | 588.021343  | 362.6814996 | 0.697605122  | 0.074033037 | 0.140531331 | PLCD1      |
| ENSG00000259129 | 5.234528471 | 0           | 4.72077467   | 0.074049146 | 0.14053877  | LINC00648  |
| ENSG00000040933 | 682.2778721 | 515.2928439 | 0.405507185  | 0.07405307  | 0.14053877  | INPP4A     |
| ENSG00000287575 | 5.7731577   | 1.029478846 | 2.449112113  | 0.074053184 | 0.14053877  | AL390755.3 |
| ENSG00000199906 | 5.454701335 | 1.080229524 | 2.338781415  | 0.074156107 | 0.140723819 | RNU5B-2P   |
| ENSG00000274400 | 6.285317763 | 0.774441189 | 3.07894704   | 0.074167952 | 0.140736017 | AC015967.1 |
| novel.408       | 34.41014033 | 91.56631688 | -1.413335539 | 0.074198272 | 0.1407824   | -          |
| ENSG00000175746 | 0.616711807 | 8.415168363 | -3.778961916 | 0.074203233 | 0.1407824   | C15orf54   |
| ENSG00000010404 | 230.1259648 | 156.2173865 | 0.560527341  | 0.074212107 | 0.140788955 | IDS        |
| ENSG00000133105 | 0           | 2.833398881 | -4.086108939 | 0.074283619 | 0.140904046 | RXFP2      |
| ENSG00000180210 | 0           | 2.833398881 | -4.086108939 | 0.074283619 | 0.140904046 | F2         |
| ENSG00000111666 | 1008.850356 | 736.5299115 | 0.454340866  | 0.074319247 | 0.140961335 | CHPT1      |
| ENSG00000225408 | 3.37178529  | 0           | 4.085621953  | 0.074331394 | 0.140974082 | AL136980.1 |
| ENSG00000131669 | 1255.925755 | 829.1128648 | 0.599494999  | 0.074372355 | 0.141041471 | NINJ1      |
| ENSG00000237604 | 7.065859161 | 0.356539013 | 4.191932444  | 0.074391    | 0.14104951  | AP001056.1 |
| ENSG00000105402 | 726.2562194 | 969.2858924 | -0.416476394 | 0.074392188 | 0.14104951  | NAPA       |
| ENSG00000280294 | 3.369277992 | 0           | 4.084649068  | 0.074407055 | 0.14104951  | AC011008.2 |
| ENSG00000271880 | 3.369277992 | 0           | 4.084649068  | 0.074407055 | 0.14104951  | AGAP11     |
| ENSG00000268204 | 3.369277992 | 0           | 4.084649068  | 0.074407055 | 0.14104951  | AC008763.1 |
| ENSG00000267049 | 2.991615051 | 10.88488337 | -1.854982102 | 0.074409168 | 0.14104951  | AC002398.1 |
| ENSG00000224661 | 24.94172604 | 0           | 6.974026521  | 0.07448231  | 0.141177857 | AC010907.1 |
| ENSG00000112041 | 14.68782736 | 4.299693123 | 1.769570934  | 0.074503874 | 0.141208429 | TULP1      |
| ENSG00000258101 | 5.209312953 | 17.73122866 | -1.772766016 | 0.074537082 | 0.141261064 | AC010173.1 |
| ENSG00000165949 | 541.9107828 | 284.5959872 | 0.92840922   | 0.074549168 | 0.141273663 | IFI27      |
| ENSG00000184226 | 982.0687309 | 317.8524188 | 1.627167471  | 0.07467083  | 0.141493899 | PCDH9      |
| ENSG00000259033 | 5.121129914 | 0           | 4.690490068  | 0.074744108 | 0.141622423 | AL356804.1 |
| ENSG00000010704 | 305.7862757 | 410.9294754 | -0.426891796 | 0.074757964 | 0.141627467 | HFE        |
| ENSG00000171467 | 669.4180421 | 478.7401394 | 0.484007551  | 0.074762592 | 0.141627467 | ZNF318     |
| ENSG00000131143 | 4508.351943 | 6008.677187 | -0.414402893 | 0.074763123 | 0.141627467 | COX41      |
| ENSG00000236935 | 5.54664532  | 0           | 4.804387343  | 0.074808893 | 0.141703838 | AP003774.4 |
| ENSG00000127366 | 25.11222332 | 10.46582532 | 1.266756591  | 0.074831951 | 0.141737181 | TAS2R5     |
| ENSG00000254198 | 14.88153106 | 28.06589852 | -0.915840027 | 0.0748999   | 0.141855541 | AC113191.1 |

|                 |             |             |              |             |             |             |
|-----------------|-------------|-------------|--------------|-------------|-------------|-------------|
| ENSG00000251002 | 3.315086011 | 0           | 4.063393252  | 0.074957903 | 0.141955046 | AC244502.1  |
| ENSG00000104427 | 484.2164647 | 284.9856011 | 0.764539894  | 0.074969342 | 0.141966361 | ZC2HC1A     |
| ENSG00000285900 | 5.109847075 | 0           | 4.687452024  | 0.074987341 | 0.141990095 | AC079177.1  |
| ENSG00000168135 | 6.437721973 | 0.774441189 | 3.109149185  | 0.075012946 | 0.142028229 | KCNJ4       |
| ENSG00000261824 | 323.9112213 | 246.8862791 | 0.391898435  | 0.075067582 | 0.14211638  | LINC00662   |
| ENSG00000233121 | 5.106014858 | 0           | 4.686410666  | 0.075070444 | 0.14211638  | VN1R20P     |
| ENSG00000232082 | 0.615458159 | 4.686913718 | -2.941402354 | 0.0750887   | 0.142140583 | RPS6KA2-IT1 |
| novel.840       | 66.26217293 | 28.90902331 | 1.191648725  | 0.075167132 | 0.142278688 | -           |
| ENSG00000254491 | 5.123708482 | 0           | 4.691190182  | 0.075248984 | 0.142423242 | AC022832.1  |
| ENSG00000116095 | 525.2751226 | 405.4238256 | 0.373790299  | 0.075259964 | 0.142433649 | PLEKHA3     |
| ENSG00000163586 | 5.095985668 | 0           | 4.683703363  | 0.075288037 | 0.142466023 | FABP1       |
| ENSG00000187527 | 5.095985668 | 0           | 4.683703363  | 0.075288037 | 0.142466023 | ATP13A5     |
| ENSG00000170776 | 1642.176122 | 1229.264865 | 0.417696439  | 0.075359868 | 0.142591562 | AKAP13      |
| ENSG00000279253 | 46.23909757 | 87.40230868 | -0.915696569 | 0.07542319  | 0.1427002   | AL121753.2  |
| ENSG00000124466 | 23.40474765 | 9.313491753 | 1.342800503  | 0.075428269 | 0.1427002   | LYPD3       |
| ENSG00000144712 | 230.1324903 | 127.1787617 | 0.854009903  | 0.075434634 | 0.142701851 | CAND2       |
| novel.976       | 0.307102255 | 6.397633132 | -4.297833482 | 0.075520477 | 0.142853842 | -           |
| ENSG00000163885 | 6.36465399  | 1.41669944  | 2.156781908  | 0.075568012 | 0.142933351 | CFAP100     |
| ENSG00000267506 | 3.330201067 | 0           | 4.06934045   | 0.075603898 | 0.142980411 | AC021683.2  |
| ENSG00000174885 | 3.330201067 | 0           | 4.06934045   | 0.075603898 | 0.142980411 | NLRP6       |
| ENSG00000243697 | 5.505061098 | 0           | 4.793926608  | 0.075632636 | 0.143024348 | AC009108.1  |
| ENSG00000135116 | 9.507490874 | 1.783850939 | 2.409696727  | 0.075707216 | 0.143151593 | HRK         |
| ENSG00000288101 | 3.561728042 | 0           | 4.16864891   | 0.075710944 | 0.143151593 | AL359987.1  |
| ENSG00000130338 | 429.0088021 | 335.4769968 | 0.355002085  | 0.075724857 | 0.14316748  | TULP4       |
| ENSG00000229754 | 5.235782119 | 0           | 4.721120652  | 0.07585593  | 0.143404854 | CXCR2P1     |
| ENSG00000206073 | 0           | 20.53009315 | -6.94044402  | 0.075996842 | 0.143660794 | SERPINB4    |
| ENSG00000035720 | 24.31373139 | 0           | 6.93723782   | 0.076031323 | 0.143715518 | STAP1       |
| ENSG00000204859 | 433.4581744 | 304.2319013 | 0.510878565  | 0.076044434 | 0.143729845 | ZBTB48      |
| ENSG00000182087 | 3184.750557 | 3945.320264 | -0.308925219 | 0.076076329 | 0.143779668 | TMEM259     |
| ENSG00000278962 | 15.48660403 | 4.320918095 | 1.844996617  | 0.076109569 | 0.143832028 | AC092645.1  |
| ENSG00000162104 | 698.1832244 | 514.2899024 | 0.440724045  | 0.076139712 | 0.143876704 | ADCY9       |
| novel.714       | 32.66781906 | 85.76501129 | -1.392706521 | 0.076149539 | 0.143876704 | -           |
| ENSG00000163382 | 823.7359337 | 1141.295524 | -0.470674541 | 0.076149823 | 0.143876704 | NAXE        |
| ENSG00000145736 | 11.28928817 | 39.87015468 | -1.815588109 | 0.076162731 | 0.143890628 | GTF2H2      |
| ENSG00000146674 | 510.704843  | 1198.669904 | -1.230946054 | 0.07617562  | 0.143904513 | IGFBP3      |
| ENSG00000267009 | 2.697120555 | 9.588598507 | -1.8174173   | 0.076216361 | 0.143971011 | AC007780.1  |
| ENSG00000214439 | 27.1690262  | 9.652530209 | 1.481122771  | 0.076245487 | 0.144015557 | FAM185BP    |
| ENSG00000145494 | 1043.825579 | 1411.222426 | -0.435182659 | 0.07628893  | 0.144087139 | NDUFS6      |
| ENSG00000102606 | 1594.129864 | 1087.067906 | 0.552446614  | 0.07635236  | 0.144196458 | ARHGEF7     |
| ENSG00000130173 | 8.426186735 | 2.51699806  | 1.746109018  | 0.076369001 | 0.144217401 | ANGPTL8     |
| ENSG00000159261 | 1.218308559 | 10.50467924 | -3.107202517 | 0.076454666 | 0.144358815 | CLDN14      |
| ENSG00000233569 | 3.04831433  | 0           | 3.940680721  | 0.076454998 | 0.144358815 | AL161630.1  |
| ENSG00000104886 | 762.2527575 | 1143.75451  | -0.585716144 | 0.076494003 | 0.144421967 | PLEKHJ1     |
| ENSG00000272583 | 3.299970955 | 0           | 4.057413414  | 0.076543435 | 0.144483797 | AL592494.2  |
| ENSG00000257210 | 3.299970955 | 0           | 4.057413414  | 0.076543435 | 0.144483797 | NACAP8      |
| ENSG00000255883 | 3.299970955 | 0           | 4.057413414  | 0.076543435 | 0.144483797 | FUNDC2P1    |
| ENSG00000167311 | 12.91319595 | 2.598430319 | 2.326095953  | 0.076573672 | 0.144530371 | ART5        |
| ENSG00000181192 | 479.7288976 | 652.375693  | -0.443015976 | 0.076605893 | 0.144580684 | DHTKD1      |
| ENSG00000183873 | 113.3785295 | 43.59969359 | 1.381363636  | 0.076622935 | 0.144602344 | SCN5A       |
| ENSG00000157184 | 201.3987191 | 278.7134728 | -0.468803947 | 0.076643594 | 0.144630827 | CPT2        |
| ENSG00000159197 | 3.296210009 | 0           | 4.055930299  | 0.07666224  | 0.144655505 | KCNE2       |

|                 |             |             |              |             |             |            |
|-----------------|-------------|-------------|--------------|-------------|-------------|------------|
| ENSG00000150867 | 742.1478227 | 521.3865806 | 0.508881375  | 0.076703956 | 0.14470483  | PIP4K2A    |
| ENSG00000086619 | 411.2038516 | 248.8422288 | 0.725766825  | 0.0767082   | 0.14470483  | ERO1B      |
| ENSG00000261172 | 24.04359821 | 0           | 6.921312622  | 0.076709995 | 0.14470483  | AC133919.2 |
| ENSG00000272183 | 8.211028466 | 1.733100261 | 2.221450805  | 0.076710659 | 0.14470483  | AC005041.3 |
| ENSG00000286366 | 16.04822621 | 7.072884716 | 1.173038763  | 0.076721726 | 0.1447152   | AC005052.2 |
| ENSG00000139800 | 49.23386031 | 9.601779531 | 2.352188232  | 0.076733094 | 0.144726136 | ZIC5       |
| ENSG00000249456 | 11.81684803 | 22.91978856 | -0.956894552 | 0.076749125 | 0.144745863 | AL731577.2 |
| ENSG00000108469 | 413.9234387 | 566.2725548 | -0.452172118 | 0.076774106 | 0.144782467 | RECQL5     |
| ENSG00000074201 | 1185.150414 | 1515.863118 | -0.355131106 | 0.076798124 | 0.14481725  | CLNS1A     |
| ENSG00000286656 | 30.86324226 | 13.47154533 | 1.19938038   | 0.076820248 | 0.144848455 | AC008875.2 |
| ENSG00000260558 | 4.20992361  | 0.336469917 | 3.446864493  | 0.076841727 | 0.144874684 | AC018557.2 |
| ENSG00000109111 | 2214.926236 | 2783.086599 | -0.329351476 | 0.076846849 | 0.144874684 | SUPT6H     |
| ENSG00000105607 | 429.2704879 | 597.3549611 | -0.477184791 | 0.076850887 | 0.144874684 | GCDH       |
| ENSG00000272654 | 24.54748093 | 12.07607086 | 1.032610342  | 0.076892814 | 0.144943205 | AL358472.2 |
| ENSG00000100359 | 23.73079718 | 47.91359522 | -1.012077564 | 0.076934005 | 0.14501033  | SGSM3      |
| ENSG00000171695 | 6.873053107 | 1.467450118 | 2.24669503   | 0.077017906 | 0.145157941 | LKAAEAR1   |
| ENSG00000279865 | 6.929752385 | 1.447381022 | 2.266917858  | 0.077070127 | 0.145245827 | AC006511.3 |
| ENSG00000197555 | 1713.377038 | 1336.813095 | 0.35820365   | 0.077097783 | 0.145287409 | SIPA1L1    |
| ENSG00000196440 | 739.6216464 | 441.9151538 | 0.743346381  | 0.077107488 | 0.145295158 | ARMCX4     |
| ENSG00000261879 | 38.36540147 | 22.6446818  | 0.762018925  | 0.077116305 | 0.145301235 | AC087500.1 |
| ENSG00000214433 | 6.623903779 | 1.386017859 | 2.230916953  | 0.077141171 | 0.145337547 | GOLGA2P8   |
| ENSG00000287124 | 6.173172855 | 0           | 4.96103928   | 0.077194363 | 0.145419655 | AL512603.2 |
| ENSG00000185742 | 23.97500283 | 4.810924314 | 2.305542871  | 0.077195947 | 0.145419655 | C11orf87   |
| ENSG00000163159 | 634.7915883 | 805.9042999 | -0.344549134 | 0.07723602  | 0.145476553 | VPS72      |
| ENSG00000180628 | 1609.097266 | 1003.916329 | 0.680337869  | 0.07723735  | 0.145476553 | PCGF5      |
| ENSG00000162591 | 568.480674  | 181.6036105 | 1.645697374  | 0.077315816 | 0.145613789 | MEGF6      |
| ENSG00000167920 | 114.2989661 | 183.2416655 | -0.682182527 | 0.077411848 | 0.145784083 | TMEM99     |
| ENSG00000092051 | 13.18129255 | 3.372871508 | 1.984411456  | 0.07743151  | 0.145810543 | JPH4       |
| ENSG00000187566 | 72.47420925 | 47.87846571 | 0.597039235  | 0.077439498 | 0.145815017 | NHLRC1     |
| ENSG00000175455 | 1496.579244 | 1078.8266   | 0.472327169  | 0.077463087 | 0.145848863 | CCDC14     |
| ENSG00000205056 | 3.018084217 | 0           | 3.927863671  | 0.07748043  | 0.145860375 | LINC02397  |
| ENSG00000230399 | 3.018084217 | 0           | 3.927863671  | 0.07748043  | 0.145860375 | RBBP8P1    |
| ENSG00000214022 | 1884.585455 | 1430.30468  | 0.398160546  | 0.077498317 | 0.145883478 | REPIN1     |
| ENSG00000288067 | 4.734691432 | 0.336469917 | 3.618172834  | 0.077535056 | 0.145942062 | AC105180.2 |
| ENSG00000100575 | 271.2222922 | 387.2146627 | -0.514471221 | 0.077547387 | 0.145954698 | TIMM9      |
| ENSG00000107341 | 1400.907236 | 1927.965682 | -0.460535815 | 0.077557664 | 0.145963467 | UBE2R2     |
| ENSG00000165898 | 267.4295788 | 378.3358977 | -0.501007072 | 0.07756447  | 0.145964852 | ISCA2      |
| ENSG00000204380 | 18.83610837 | 5.002158663 | 1.910421009  | 0.077569636 | 0.145964852 | PKP4-AS1   |
| ENSG00000166681 | 2669.755122 | 3915.486942 | -0.552486979 | 0.077578904 | 0.145971719 | BEX3       |
| ENSG00000106013 | 3.912921816 | 10.68072479 | -1.447956383 | 0.077604236 | 0.146008809 | ANKRD7     |
| ENSG00000232150 | 21.60497199 | 37.86006828 | -0.812600364 | 0.0776333   | 0.146052915 | ST13P4     |
| ENSG00000250075 | 11.98415383 | 3.149799701 | 1.917002181  | 0.077645203 | 0.146059436 | AC104806.2 |
| ENSG00000236591 | 9.794107472 | 31.71960898 | -1.689470369 | 0.077656164 | 0.146059436 | AL357992.1 |
| ENSG00000126254 | 1515.476108 | 2041.377786 | -0.429839938 | 0.077656666 | 0.146059436 | RBM42      |
| ENSG00000188916 | 3.668787083 | 15.14084228 | -2.045090843 | 0.077659253 | 0.146059436 | INSYN2A    |
| ENSG00000157890 | 5.10350756  | 0.723690511 | 2.827470564  | 0.077715297 | 0.146154263 | MEGF11     |
| ENSG00000146281 | 397.5843222 | 248.7808781 | 0.675710345  | 0.07773898  | 0.14618822  | PM20D2     |
| ENSG00000228526 | 694.7830766 | 970.4791217 | -0.481972013 | 0.077758842 | 0.146214987 | MIR34AHG   |
| ENSG00000222017 | 3.373038938 | 0           | 4.086158406  | 0.077798196 | 0.146257231 | AC011997.1 |
| ENSG00000236078 | 3.373038938 | 0           | 4.086158406  | 0.077798196 | 0.146257231 | LINC01447  |
| ENSG00000286504 | 3.373038938 | 0           | 4.086158406  | 0.077798196 | 0.146257231 | AC092745.4 |

|                 |             |             |              |             |             |               |
|-----------------|-------------|-------------|--------------|-------------|-------------|---------------|
| ENSG00000172260 | 1492.31004  | 617.5669274 | 1.272614036  | 0.077835525 | 0.14631682  | NEGR1         |
| ENSG00000222020 | 28.69569066 | 14.61557816 | 0.971037005  | 0.077856501 | 0.146345662 | HDAC4-AS1     |
| ENSG00000197372 | 104.8159788 | 71.53371314 | 0.550620461  | 0.077939633 | 0.146491327 | ZNF675        |
| ENSG00000146007 | 874.8062666 | 1231.141639 | -0.493163223 | 0.07795501  | 0.14650963  | ZMAT2         |
| ENSG00000204776 | 0.307102255 | 3.698728939 | -3.500074916 | 0.077977224 | 0.146540779 | IGKV1OR-3     |
| ENSG00000279799 | 12.9407053  | 3.912472529 | 1.721622107  | 0.078037326 | 0.14664312  | AC006077.2    |
| ENSG00000066427 | 649.4640474 | 403.7727055 | 0.686192392  | 0.078069318 | 0.146692627 | ATXN3         |
| ENSG00000146457 | 1270.072886 | 1795.679407 | -0.499416874 | 0.078086847 | 0.146714953 | WTAP          |
| ENSG00000261732 | 2.699627853 | 10.10928631 | -1.898896795 | 0.078139721 | 0.146803679 | AL031708.1    |
| ENSG00000131398 | 159.9075336 | 58.89368699 | 1.443471775  | 0.078145848 | 0.146804574 | KCNC3         |
| ENSG00000186635 | 2697.370306 | 1727.736033 | 0.642766453  | 0.078204459 | 0.146904059 | ARAP1         |
| ENSG00000159409 | 5.745434885 | 1.110911105 | 2.396974055  | 0.078227783 | 0.146937249 | CELF3         |
| ENSG00000273312 | 10.11911682 | 2.466247382 | 2.024038888  | 0.078259467 | 0.14697032  | AL121749.1    |
| novel.218       | 5.841211088 | 28.61213082 | -2.292692032 | 0.078269922 | 0.14697032  | -             |
| ENSG00000231007 | 0.308355904 | 3.506338714 | -3.434743534 | 0.07828228  | 0.14697032  | CDC20P1       |
| ENSG00000272057 | 6.918398275 | 1.406086955 | 2.284353959  | 0.078282809 | 0.14697032  | AC016575.1    |
| ENSG00000253930 | 7.608178066 | 16.90590839 | -1.153880486 | 0.078283396 | 0.14697032  | TNFRSF10A-AS1 |
| ENSG00000267702 | 5.983230103 | 0.713078025 | 3.064340431  | 0.078287248 | 0.14697032  | AP005131.6    |
| ENSG00000284024 | 274.5943344 | 353.6761076 | -0.365509815 | 0.078290463 | 0.14697032  | HSPA14        |
| ENSG00000249685 | 14.88278471 | 28.52522316 | -0.941740022 | 0.078290644 | 0.14697032  | AC079921.2    |
| ENSG00000179163 | 591.7269977 | 373.9854754 | 0.662780532  | 0.07832915  | 0.147031981 | FUCA1         |
| ENSG00000223646 | 4.194808554 | 0.356539013 | 3.442265266  | 0.078374622 | 0.147106708 | AC002463.1    |
| ENSG00000225727 | 7.429304689 | 1.049547942 | 2.808642487  | 0.078384875 | 0.147115325 | AL139184.1    |
| ENSG00000226221 | 112.1544784 | 178.7902683 | -0.673121372 | 0.078417288 | 0.147164058 | RPL26P19      |
| ENSG00000204178 | 476.7040747 | 632.9112829 | -0.408428873 | 0.078422169 | 0.147164058 | MACO1         |
| ENSG00000235408 | 2.682005499 | 9.824851338 | -1.870085216 | 0.078441307 | 0.147189339 | SNORA71B      |
| ENSG00000277310 | 3.049567979 | 0           | 3.941227633  | 0.078458878 | 0.147211679 | AC090246.1    |
| ENSG00000279048 | 17.45271657 | 6.634913444 | 1.383488825  | 0.078485489 | 0.147250975 | AC080080.1    |
| ENSG00000180432 | 5.237035768 | 0           | 4.721473612  | 0.078559134 | 0.147376931 | CYP8B1        |
| ENSG00000180257 | 96.05686136 | 60.82012342 | 0.656503184  | 0.078565107 | 0.147376931 | ZNF816        |
| ENSG00000272068 | 7.829604579 | 1.783850939 | 2.131616585  | 0.078573543 | 0.147376931 | AL365181.2    |
| ENSG00000138078 | 1097.877698 | 813.4294793 | 0.432314108  | 0.078577068 | 0.147376931 | PREPL         |
| ENSG00000134996 | 1007.865382 | 756.6236816 | 0.413606148  | 0.078580987 | 0.147376931 | OSTF1         |
| ENSG00000262833 | 1.186824798 | 8.303054522 | -2.795723451 | 0.07861982  | 0.147439118 | AC016245.1    |
| ENSG00000177600 | 9787.278037 | 13590.45546 | -0.473610215 | 0.07865105  | 0.147487039 | RPLP2         |
| ENSG00000223523 | 3.345316124 | 0           | 4.075291503  | 0.078680019 | 0.147509422 | AC092598.1    |
| ENSG00000247193 | 3.345316124 | 0           | 4.075291503  | 0.078680019 | 0.147509422 | AC104078.1    |
| ENSG00000122859 | 3.345316124 | 0           | 4.075291503  | 0.078680019 | 0.147509422 | NEUROG3       |
| ENSG00000239827 | 12.15418039 | 4.055267952 | 1.597640026  | 0.078699002 | 0.147534365 | SUGT1P3       |
| ENSG00000184923 | 20.74795767 | 9.04912588  | 1.199417569  | 0.078800592 | 0.147714154 | NUTM2A        |
| ENSG00000100523 | 590.2578582 | 450.4118956 | 0.389781087  | 0.078838711 | 0.147770613 | DDHD1         |
| ENSG00000226054 | 36.15919987 | 73.51688956 | -1.024230833 | 0.078842086 | 0.147770613 | MEMO1P1       |
| ENSG00000250462 | 230.6973318 | 167.8723916 | 0.459479639  | 0.078852883 | 0.147780188 | LRRC37BP1     |
| novel.819       | 77.3950394  | 173.2846996 | -1.162585482 | 0.078887067 | 0.147833589 | -             |
| ENSG00000138658 | 141.246538  | 206.4255972 | -0.546698363 | 0.078938057 | 0.147908219 | ZGRF1         |
| ENSG00000286036 | 3.035706571 | 0           | 3.935348108  | 0.078938277 | 0.147908219 | AC017099.2    |
| ENSG00000251301 | 5.225681658 | 0.336469917 | 3.755983345  | 0.078946197 | 0.147912393 | LINC02384     |
| ENSG00000137040 | 493.5991714 | 630.6952869 | -0.353719693 | 0.078973294 | 0.147952491 | RANBP6        |
| ENSG00000225361 | 11.2518209  | 22.78760562 | -1.022473914 | 0.079003596 | 0.147998588 | PPP1R26-AS1   |
| ENSG00000102104 | 3.031945625 | 0           | 3.933758202  | 0.079068935 | 0.148099632 | RS1           |
| ENSG00000273819 | 3.031945625 | 0           | 3.933758202  | 0.079068935 | 0.148099632 | ENPP7P7       |



|                 |             |             |              |             |             |            |
|-----------------|-------------|-------------|--------------|-------------|-------------|------------|
| ENSG00000267534 | 514.9925044 | 354.5206798 | 0.539616191  | 0.079079317 | 0.148108401 | S1PR2      |
| ENSG00000143845 | 147.225137  | 232.5965584 | -0.660273806 | 0.079124192 | 0.148181766 | ETNK2      |
| ENSG00000284154 | 3.029438327 | 13.78666188 | -2.182135745 | 0.079181152 | 0.148277751 | MIR3605    |
| ENSG00000221643 | 0           | 2.92428775  | -4.126264069 | 0.079205739 | 0.148313103 | SNORA77    |
| ENSG00000108349 | 2532.57939  | 1934.666127 | 0.388553105  | 0.079212747 | 0.148315535 | CASC3      |
| ENSG00000124570 | 3508.532271 | 2668.953874 | 0.394555698  | 0.079248175 | 0.148371178 | SERPINB6   |
| ENSG00000258559 | 37.99622934 | 16.85502932 | 1.179622317  | 0.079256849 | 0.148376726 | AC005519.1 |
| ENSG00000144214 | 43.52532358 | 22.0944683  | 0.982191522  | 0.079334752 | 0.148511867 | LYG1       |
| ENSG00000181215 | 4.296853001 | 0.336469917 | 3.473101805  | 0.079423393 | 0.148667088 | C4orf50    |
| ENSG00000162814 | 10.37962025 | 23.02257418 | -1.15550859  | 0.079484518 | 0.148770785 | SPATA17    |
| ENSG00000287271 | 29.76410231 | 12.93194431 | 1.213203572  | 0.079521577 | 0.148829427 | AC011455.6 |
| ENSG00000127666 | 361.1869419 | 548.0061946 | -0.600878504 | 0.079541702 | 0.148856369 | TICAM1     |
| ENSG00000230383 | 176.0892446 | 277.6551105 | -0.657023993 | 0.07954871  | 0.148858761 | AC009245.1 |
| ENSG00000141002 | 1828.284208 | 2356.501361 | -0.36603624  | 0.079563115 | 0.148874995 | TCF25      |
| ENSG00000203739 | 68.34208348 | 42.10772645 | 0.700484637  | 0.079589318 | 0.14891297  | AL645568.1 |
| ENSG00000120664 | 24.40266988 | 9.619408483 | 1.340867428  | 0.079594874 | 0.14891297  | SPART-AS1  |
| ENSG00000244560 | 120.7494815 | 78.09035798 | 0.631637144  | 0.079601622 | 0.148914871 | AC004890.2 |
| ENSG00000250327 | 14.30633221 | 2.742510011 | 2.365264179  | 0.079635898 | 0.148968267 | RPSAP70    |
| ENSG00000174327 | 23.13922962 | 43.33421902 | -0.905443746 | 0.07966407  | 0.149010238 | SLC16A13   |
| ENSG00000008282 | 1440.438063 | 1801.576249 | -0.322856335 | 0.07967515  | 0.149020234 | SYPL1      |
| ENSG00000169635 | 118.2518347 | 207.5534481 | -0.810301956 | 0.079710851 | 0.149076276 | HIC2       |
| ENSG00000266217 | 4.255268779 | 0.387220594 | 3.460563809  | 0.079763162 | 0.149163371 | CTSLP2     |
| ENSG00000242512 | 5.054401445 | 0           | 4.672368325  | 0.079859622 | 0.149325272 | LINC01206  |
| ENSG00000211460 | 1095.461851 | 1492.965033 | -0.446861105 | 0.079861232 | 0.149325272 | TSN        |
| ENSG00000152782 | 59.90894433 | 102.8087667 | -0.781452205 | 0.079906306 | 0.149391471 | PANK1      |
| ENSG00000225849 | 8.178291056 | 2.079026788 | 1.951526101  | 0.079913136 | 0.149391471 | MKRN7P     |
| ENSG00000279520 | 15.0601197  | 30.998487   | -1.038989464 | 0.079913886 | 0.149391471 | AC093525.8 |
| ENSG00000236514 | 7.317444516 | 1.456837632 | 2.336458925  | 0.079922228 | 0.149396316 | AL135791.1 |
| ENSG00000265874 | 9.10085147  | 2.864080462 | 1.666043359  | 0.07996217  | 0.149460225 | MIR4489    |
| ENSG00000229536 | 3.005476459 | 0           | 3.922464968  | 0.079999785 | 0.149519776 | LINC02572  |
| ENSG00000159905 | 12.64621081 | 29.56886333 | -1.223273831 | 0.080018384 | 0.14954378  | ZNF221     |
| novel.762       | 3.00422281  | 0           | 3.921931402  | 0.080044226 | 0.149570558 | -          |
| ENSG00000250250 | 3.00422281  | 0           | 3.921931402  | 0.080044226 | 0.149570558 | AC010638.1 |
| ENSG00000184675 | 128.8700335 | 88.46786297 | 0.543680878  | 0.080058381 | 0.14958625  | AMER1      |
| ENSG00000283208 | 10.4360348  | 2.506385574 | 2.058342311  | 0.080116657 | 0.149677945 | AC001226.2 |
| novel.242       | 6.992719907 | 15.96030195 | -1.196457087 | 0.080118979 | 0.149677945 | -          |
| ENSG00000235070 | 15.23877962 | 4.53581756  | 1.738045649  | 0.080129603 | 0.14968703  | AC062015.1 |
| ENSG00000134463 | 129.939058  | 217.6600503 | -0.743789537 | 0.080195004 | 0.149798432 | ECHDC3     |
| ENSG00000154781 | 416.2549624 | 316.5437114 | 0.395662681  | 0.080283376 | 0.149952724 | CCDC174    |
| ENSG00000087076 | 178.2568681 | 89.22270179 | 1.000647095  | 0.080301055 | 0.149974963 | HSD17B14   |
| ENSG00000185475 | 344.7439998 | 468.2303831 | -0.442149737 | 0.080342643 | 0.150041849 | TMEM179B   |
| ENSG00000150782 | 592.6541566 | 166.5559689 | 1.830600968  | 0.080364963 | 0.150072746 | IL18       |
| novel.736       | 37.40967637 | 86.28789559 | -1.205841203 | 0.080385369 | 0.150100063 | -          |
| ENSG00000204149 | 36.08251349 | 18.88214956 | 0.938252064  | 0.080440595 | 0.150190057 | AGAP6      |
| ENSG00000166529 | 109.1296278 | 68.35811215 | 0.672021346  | 0.080445127 | 0.150190057 | ZSCAN21    |
| ENSG00000260368 | 11.22033714 | 2.793260689 | 1.992210711  | 0.08046249  | 0.15021168  | AC027373.1 |
| ENSG00000143257 | 18.76289785 | 4.982089567 | 1.909714163  | 0.080486088 | 0.150244938 | NR1I3      |
| ENSG00000141424 | 1459.90808  | 1893.398794 | -0.375212597 | 0.080585515 | 0.150419734 | SLC39A6    |
| ENSG00000236938 | 0           | 4.523920805 | -4.754959862 | 0.080603569 | 0.150442624 | AC003092.2 |
| ENSG00000105287 | 486.5743269 | 615.851851  | -0.340034901 | 0.08064557  | 0.150503615 | PRKD2      |
| ENSG00000100565 | 3.284855899 | 0           | 4.051361461  | 0.080657434 | 0.150503615 | LRRRC74A   |

|                 |             |             |              |             |             |            |
|-----------------|-------------|-------------|--------------|-------------|-------------|------------|
| ENSG00000174776 | 3.284855899 | 0           | 4.051361461  | 0.080657434 | 0.150503615 | WDR49      |
| ENSG00000112996 | 410.4985573 | 566.924141  | -0.46640095  | 0.080659418 | 0.150503615 | MRPS30     |
| ENSG00000115756 | 768.022794  | 1443.816043 | -0.910526791 | 0.080673952 | 0.150519924 | HPCAL1     |
| ENSG00000105464 | 43.63309428 | 113.3448511 | -1.378001168 | 0.080693365 | 0.150545334 | GRIN2D     |
| ENSG00000196668 | 40.77497996 | 13.7559803  | 1.57510024   | 0.080715745 | 0.150576275 | LINC00173  |
| ENSG00000286810 | 7.842212337 | 2.089639274 | 1.88776394   | 0.080733776 | 0.150590893 | AL513128.3 |
| ENSG00000284266 | 3.282348601 | 0           | 4.0503661    | 0.08074097  | 0.150590893 | MIR4534    |
| ENSG00000233033 | 3.282348601 | 0           | 4.0503661    | 0.08074097  | 0.150590893 | CASK-AS1   |
| ENSG00000143951 | 142.9611361 | 88.45776407 | 0.690452355  | 0.080795888 | 0.150682505 | WDPCP      |
| ENSG00000184227 | 45.05889702 | 22.46303246 | 0.997264456  | 0.080872448 | 0.150814461 | ACOT1      |
| ENSG00000267421 | 8.513116126 | 2.476859868 | 1.770532931  | 0.081026242 | 0.151090417 | AC005498.2 |
| ENSG0000004838  | 26.17207288 | 12.48464482 | 1.066637613  | 0.081045891 | 0.151116212 | ZMYND10    |
| ENSG00000177034 | 660.1038708 | 476.5992015 | 0.469984007  | 0.081057903 | 0.151127763 | MTX3       |
| ENSG00000116273 | 503.5116645 | 685.1893208 | -0.444038005 | 0.081068151 | 0.151136023 | PHF13      |
| ENSG00000140332 | 1551.625199 | 987.8501088 | 0.651673336  | 0.08110861  | 0.151200602 | TLE3       |
| ENSG00000262772 | 3.620934617 | 0.356539013 | 3.229053384  | 0.08112331  | 0.151201833 | LINC01977  |
| ENSG00000141644 | 1255.308016 | 1589.760794 | -0.340580371 | 0.081126637 | 0.151201833 | MBD1       |
| ENSG00000198121 | 5082.429742 | 2991.992812 | 0.764329316  | 0.081126729 | 0.151201833 | LPAR1      |
| ENSG00000064601 | 2221.942942 | 3278.674703 | -0.561195604 | 0.081217444 | 0.151360047 | CTSA       |
| ENSG00000234791 | 5.530347887 | 0           | 4.8003403    | 0.08123082  | 0.151374117 | AC108448.1 |
| ENSG00000119042 | 166.963221  | 279.3393264 | -0.741590524 | 0.081290127 | 0.151473772 | SATB2      |
| ENSG00000228709 | 2.756327131 | 8.95823701  | -1.707707481 | 0.081323235 | 0.151524597 | LINC02575  |
| ENSG00000075407 | 638.3500265 | 489.9736934 | 0.381817996  | 0.08135956  | 0.151581408 | ZNF37A     |
| ENSG00000117691 | 1050.100981 | 802.8079818 | 0.387174596  | 0.08138     | 0.151608617 | NENF       |
| ENSG00000143061 | 78.60059695 | 28.73781087 | 1.44982941   | 0.081425529 | 0.151682561 | IGSF3      |
| ENSG00000236138 | 3.313832363 | 11.11998033 | -1.751390137 | 0.081441039 | 0.151700577 | DUX4L26    |
| ENSG00000226440 | 22.23909269 | 8.022087178 | 1.462067829  | 0.081473638 | 0.151750418 | AL365214.2 |
| ENSG00000226548 | 0.586481695 | 5.512105584 | -3.206202438 | 0.08148098  | 0.151753215 | AC016722.1 |
| ENSG00000137936 | 769.5648464 | 1177.133802 | -0.612874133 | 0.081519288 | 0.151813677 | BCAR3      |
| ENSG00000272861 | 10.35189744 | 2.557136252 | 2.025323352  | 0.081528482 | 0.151819917 | AC012360.2 |
| ENSG00000120860 | 640.2174561 | 496.6835366 | 0.366600162  | 0.081631562 | 0.152000976 | WASHC3     |
| ENSG00000233306 | 4.923665269 | 0           | 4.632442096  | 0.081653339 | 0.152030628 | TRGV2      |
| ENSG00000255760 | 7.051926483 | 1.467450118 | 2.27763994   | 0.081692372 | 0.152086486 | LINC02422  |
| ENSG00000280042 | 1.218308559 | 6.460152171 | -2.41075401  | 0.081695047 | 0.152086486 | AC022336.3 |
| ENSG00000282458 | 9.042898543 | 21.03572053 | -1.221685797 | 0.081703981 | 0.152086753 | WASH5P     |
| ENSG00000213839 | 41.17584932 | 62.98148155 | -0.612292068 | 0.081706897 | 0.152086753 | TMX2P1     |
| ENSG00000147041 | 21.10681588 | 6.339737595 | 1.728347203  | 0.081719808 | 0.152099888 | SYTL5      |
| ENSG00000271265 | 7.536363731 | 1.722487775 | 2.101784431  | 0.0817543   | 0.152153185 | AL355297.3 |
| ENSG00000197381 | 1297.251342 | 2456.031305 | -0.920959796 | 0.081823428 | 0.152270933 | ADARB1     |
| ENSG00000225940 | 4.924918918 | 0           | 4.632795831  | 0.08195587  | 0.15250648  | C5orf67    |
| ENSG00000183496 | 106.6101979 | 168.7602309 | -0.663095439 | 0.081975292 | 0.152531696 | MEX3B      |
| ENSG00000268686 | 7.927888079 | 2.191140629 | 1.865949478  | 0.08209592  | 0.152745209 | AC010643.1 |
| ENSG00000156398 | 142.7444398 | 270.1043385 | -0.92058851  | 0.082108423 | 0.152757532 | SFXN2      |
| novel.666       | 36.73572365 | 18.23300323 | 1.002323161  | 0.082162244 | 0.152846717 | -          |
| ENSG00000215375 | 290.361073  | 196.6178268 | 0.561417467  | 0.082222414 | 0.152939081 | MYL5       |
| ENSG00000099219 | 464.9558767 | 308.5739156 | 0.590736836  | 0.082223667 | 0.152939081 | ERMP1      |
| ENSG00000263843 | 35.60656705 | 18.39702363 | 0.948128499  | 0.082374746 | 0.153209125 | AC022211.2 |
| ENSG00000261094 | 45.04475088 | 27.58663318 | 0.706964727  | 0.082382554 | 0.15321268  | AC007066.2 |
| ENSG00000136243 | 412.339648  | 296.4175687 | 0.476459368  | 0.082409129 | 0.153251133 | NUPL2      |
| ENSG00000213672 | 616.5338142 | 918.7924167 | -0.575199116 | 0.082418122 | 0.153256887 | NCKIPSD    |
| ENSG00000114854 | 18.39060551 | 4.514592589 | 2.014261797  | 0.082522636 | 0.153440249 | TNNC1      |

|                 |             |             |              |             |             |            |
|-----------------|-------------|-------------|--------------|-------------|-------------|------------|
| ENSG00000136867 | 3.049567979 | 9.395052407 | -1.625622845 | 0.082541493 | 0.153464328 | SLC31A2    |
| ENSG00000236527 | 0           | 2.965581817 | -4.144175446 | 0.082567533 | 0.153501759 | ARF4P2     |
| ENSG00000104880 | 452.6370838 | 601.5035928 | -0.410235666 | 0.082607481 | 0.153565038 | ARHGEF18   |
| novel.317       | 142.683125  | 82.79045273 | 0.786276775  | 0.082650392 | 0.153624407 | -          |
| ENSG00000178913 | 1574.07132  | 2108.935686 | -0.422004749 | 0.082651244 | 0.153624407 | TAF7       |
| ENSG00000109255 | 0.307102255 | 3.515795324 | -3.438041208 | 0.082661786 | 0.153625912 | NMU        |
| ENSG00000132670 | 1976.148135 | 1456.847813 | 0.439706113  | 0.082663879 | 0.153625912 | PTPRA      |
| ENSG00000119699 | 153.0063151 | 78.8124259  | 0.954952325  | 0.082673073 | 0.153631196 | TGFB3      |
| ENSG00000253347 | 12.6701014  | 4.279624027 | 1.562791468  | 0.08268067  | 0.153631196 | AC040934.1 |
| ENSG00000287387 | 6.968758039 | 1.467450118 | 2.262941368  | 0.082684462 | 0.153631196 | AC010883.3 |
| ENSG00000220305 | 7.215400069 | 1.069617038 | 2.749498049  | 0.082775335 | 0.153789042 | HNRNPH1P1  |
| ENSG00000157895 | 288.9594463 | 391.2389111 | -0.437650008 | 0.082790099 | 0.153805474 | C12orf43   |
| ENSG00000183579 | 259.7032449 | 181.5050504 | 0.516289142  | 0.08280325  | 0.153818908 | ZNRF3      |
| ENSG00000287294 | 6.445315137 | 0.713078025 | 3.168731893  | 0.082815381 | 0.153830443 | AL035694.1 |
| ENSG00000229498 | 6.199642021 | 0.387220594 | 4.005939797  | 0.082882003 | 0.153943188 | AC105053.1 |
| ENSG00000186141 | 488.6687393 | 646.8944234 | -0.40499856  | 0.082906618 | 0.153977899 | POLR3C     |
| ENSG00000227959 | 10.60362533 | 3.179325408 | 1.728025438  | 0.08296642  | 0.154077953 | AL451042.2 |
| ENSG00000107223 | 3505.985667 | 4501.045074 | -0.360435995 | 0.083008347 | 0.154131415 | EDF1       |
| ENSG00000127125 | 826.9080596 | 623.3973226 | 0.407310164  | 0.083009387 | 0.154131415 | PPCS       |
| ENSG00000231738 | 0.307102255 | 3.240688571 | -3.314786231 | 0.083013005 | 0.154131415 | TSPAN19    |
| ENSG00000199459 | 0           | 2.822786395 | -4.081378114 | 0.083172071 | 0.154404685 | RF00019    |
| ENSG00000287161 | 0           | 2.822786395 | -4.081378114 | 0.083172071 | 0.154404685 | AC093519.2 |
| ENSG00000138433 | 734.9793374 | 528.3160963 | 0.476692223  | 0.08319688  | 0.154439708 | CIR1       |
| ENSG00000279365 | 0           | 4.554602387 | -4.764311057 | 0.083209384 | 0.154451884 | AP000695.3 |
| ENSG00000143933 | 11891.63613 | 9663.390847 | 0.299346088  | 0.083219114 | 0.154452986 | CALM2      |
| ENSG00000166359 | 28.4442475  | 11.77986753 | 1.268620496  | 0.083229431 | 0.154452986 | WDR88      |
| ENSG00000168137 | 1681.494576 | 2374.28929  | -0.49760696  | 0.083230588 | 0.154452986 | SETD5      |
| ENSG00000014914 | 531.3673326 | 307.4183247 | 0.789804903  | 0.083237986 | 0.154452986 | MTMR11     |
| ENSG00000175274 | 578.5683692 | 1071.37298  | -0.88914212  | 0.083243485 | 0.154452986 | TP53I11    |
| ENSG00000229444 | 0.293240848 | 3.240688571 | -3.31478818  | 0.083245647 | 0.154452986 | AL451062.1 |
| ENSG00000113638 | 387.7388575 | 273.6515264 | 0.503808533  | 0.083302841 | 0.154548066 | TTC33      |
| ENSG00000172296 | 174.9791343 | 62.6505339  | 1.479885871  | 0.083318126 | 0.154565385 | SPTLC3     |
| ENSG00000261613 | 13.88311063 | 2.272572888 | 2.63267158   | 0.083348375 | 0.154610462 | AC093525.6 |
| ENSG00000149792 | 809.3474569 | 1148.426933 | -0.505061701 | 0.083482996 | 0.154849127 | MRPL49     |
| ENSG00000171634 | 1369.564802 | 996.1473146 | 0.459280191  | 0.083494552 | 0.154859505 | BPTF       |
| ENSG00000279456 | 33.40516658 | 16.19270197 | 1.054204414  | 0.083548869 | 0.154949187 | AL353763.1 |
| ENSG00000170893 | 2.775203133 | 184.8044649 | -6.058192837 | 0.083563816 | 0.154965846 | TRH        |
| novel.969       | 21.58678017 | 0           | 6.765846396  | 0.083599161 | 0.155020328 | -          |
| ENSG00000280287 | 18.72647076 | 35.3689999  | -0.915468842 | 0.083623443 | 0.155054288 | AC131212.3 |
| ENSG00000167526 | 22143.33249 | 29571.83231 | -0.417349589 | 0.083672855 | 0.155134836 | RPL13      |
| ENSG00000184897 | 1081.955875 | 1667.699307 | -0.624174628 | 0.083688759 | 0.15515325  | H1FX       |
| ENSG00000085721 | 32.86556843 | 83.41203362 | -1.344330737 | 0.083699836 | 0.155162714 | RRN3       |
| ENSG00000225872 | 4.793898008 | 12.8824779  | -1.421629715 | 0.083732788 | 0.155212726 | LINC01529  |
| ENSG00000253829 | 6.684364003 | 1.406086955 | 2.2324414    | 0.083750303 | 0.155234117 | AC067817.2 |
| ENSG00000095932 | 8.275320908 | 1.161661783 | 2.874643935  | 0.083786075 | 0.155289344 | SMIM24     |
| ENSG00000235885 | 0           | 4.401194479 | -4.717445004 | 0.083928314 | 0.155541874 | LINC01828  |
| novel.140       | 21.47588891 | 0           | 6.758448608  | 0.083939128 | 0.155550818 | -          |
| ENSG00000171811 | 18.51131249 | 33.43623616 | -0.850292845 | 0.083971848 | 0.155600356 | CFAP46     |
| ENSG00000152464 | 132.922823  | 188.0392332 | -0.500360255 | 0.083993854 | 0.155630033 | RPP38      |
| ENSG00000211456 | 1114.750629 | 801.0787472 | 0.476294152  | 0.084100781 | 0.155817043 | SACM1L     |
| ENSG00000102580 | 1047.275348 | 1305.580923 | -0.3181308   | 0.084118251 | 0.155838297 | DNAJC3     |

|                 |             |             |              |             |             |             |
|-----------------|-------------|-------------|--------------|-------------|-------------|-------------|
| ENSG00000145592 | 7601.628964 | 10255.4685  | -0.432016011 | 0.084131761 | 0.155852213 | RPL37       |
| novel.446       | 40.74373784 | 128.6221143 | -1.659177193 | 0.084149541 | 0.155874036 | -           |
| ENSG00000278784 | 5.686228309 | 0.774441189 | 2.936112553  | 0.084199863 | 0.15595613  | AL136295.7  |
| ENSG00000232439 | 7.480918102 | 1.436768536 | 2.382564025  | 0.084252824 | 0.156043102 | RPL18AP7    |
| ENSG00000280216 | 12.01814489 | 3.331577441 | 1.866791966  | 0.084278012 | 0.156078625 | AL022326.2  |
| novel.663       | 110.0163302 | 59.24274282 | 0.891686316  | 0.084312718 | 0.15613177  | -           |
| ENSG00000079313 | 581.7662835 | 837.759675  | -0.525805268 | 0.08435995  | 0.156208101 | REXO1       |
| ENSG00000081853 | 98.33986406 | 54.96653924 | 0.841185819  | 0.084463635 | 0.156388947 | PCDHGA2     |
| ENSG00000148303 | 135.5538989 | 213.4237753 | -0.654402033 | 0.084480361 | 0.156408769 | RPL7A       |
| ENSG00000286496 | 0.601596751 | 4.525205075 | -2.913505537 | 0.084530416 | 0.156490291 | AL359764.1  |
| ENSG00000121743 | 44.33910058 | 21.43226934 | 1.046424388  | 0.084541487 | 0.156499636 | GJA3        |
| ENSG00000225362 | 0.925067711 | 6.715189828 | -2.872953526 | 0.084576774 | 0.156553802 | CT62        |
| ENSG00000223396 | 35.86323827 | 20.57511163 | 0.805334492  | 0.084600133 | 0.156585884 | RPS10P7     |
| ENSG00000237552 | 4.80274482  | 0           | 4.59813111   | 0.084646374 | 0.156649152 | LINC02567   |
| ENSG00000260412 | 4.80274482  | 0           | 4.59813111   | 0.084646374 | 0.156649152 | AL353746.1  |
| ENSG00000287252 | 12.48775182 | 26.69750961 | -1.094250008 | 0.08470167  | 0.15674032  | AL009179.2  |
| ENSG00000279489 | 5.408102518 | 0.774441189 | 2.86548298   | 0.08473246  | 0.15678613  | AL355377.2  |
| ENSG00000264148 | 4.270383835 | 0.356539013 | 3.465182637  | 0.084799928 | 0.156899795 | AC138207.3  |
| ENSG00000126773 | 1264.101908 | 1749.71081  | -0.468816617 | 0.084827983 | 0.15691556  | PCNX4       |
| ENSG00000240889 | 15.73854538 | 5.379922647 | 1.548016453  | 0.084829087 | 0.15691556  | NDUFB2-AS1  |
| ENSG00000270497 | 1.828752122 | 8.814157318 | -2.268446549 | 0.084832405 | 0.15691556  | BX322635.1  |
| ENSG00000251417 | 24.44801505 | 10.55915433 | 1.204286444  | 0.084832607 | 0.15691556  | AC145285.2  |
| ENSG00000099385 | 1018.349257 | 713.266675  | 0.513364927  | 0.08488023  | 0.156992471 | BCL7C       |
| ENSG00000106723 | 2224.880381 | 1800.648773 | 0.305212573  | 0.084904796 | 0.15702673  | SPIN1       |
| novel.619       | 38.66999643 | 19.5348919  | 0.993888002  | 0.085013958 | 0.157217428 | -           |
| ENSG00000273108 | 6.072666791 | 1.10029862  | 2.479493546  | 0.08509389  | 0.157346559 | AL121929.2  |
| ENSG00000101161 | 1820.976837 | 2273.766963 | -0.32038522  | 0.085095897 | 0.157346559 | PRPF6       |
| ENSG00000248375 | 1.230916317 | 6.288986917 | -2.369703758 | 0.085133176 | 0.157404288 | AC104066.1  |
| ENSG00000176393 | 1164.289767 | 1633.735965 | -0.488883226 | 0.085170333 | 0.157458144 | RNPEP       |
| ENSG00000025423 | 5.156445892 | 12.81995886 | -1.317585233 | 0.085176797 | 0.157458144 | HSD17B6     |
| ENSG00000174326 | 19.06276294 | 5.126040865 | 1.900036488  | 0.085180486 | 0.157458144 | SLC16A11    |
| ENSG00000214146 | 3.050821627 | 0           | 3.941821443  | 0.085242957 | 0.157528791 | LINC02026   |
| ENSG00000228329 | 3.050821627 | 0           | 3.941821443  | 0.085242957 | 0.157528791 | LINC01890   |
| ENSG00000285347 | 3.050821627 | 0           | 3.941821443  | 0.085242957 | 0.157528791 | AL359555.4  |
| ENSG00000246022 | 3.050821627 | 0           | 3.941821443  | 0.085242957 | 0.157528791 | ALDH1L1-AS2 |
| ENSG00000121350 | 293.2174792 | 199.1879685 | 0.55718511   | 0.085335253 | 0.157688138 | PYROXD1     |
| ENSG00000183421 | 60.1182338  | 18.8606678  | 1.678609738  | 0.085359591 | 0.157721893 | RIPK4       |
| ENSG00000272209 | 3.045807032 | 0           | 3.939694005  | 0.085430382 | 0.157830246 | AL023583.1  |
| ENSG00000254432 | 3.045807032 | 0           | 3.939694005  | 0.085430382 | 0.157830246 | AC113143.1  |
| ENSG00000224690 | 0.308355904 | 3.291439249 | -3.333310006 | 0.085451337 | 0.157857735 | UBE2D3P3    |
| ENSG00000287613 | 3.351655638 | 0           | 4.077841281  | 0.085501572 | 0.157928079 | AC069549.2  |
| ENSG00000227579 | 3.351655638 | 0           | 4.077841281  | 0.085501572 | 0.157928079 | AL136114.1  |
| ENSG00000183309 | 34.17442514 | 16.80427865 | 1.03027362   | 0.085530036 | 0.157969423 | ZNF623      |
| ENSG00000161609 | 3.68390214  | 0           | 4.213553155  | 0.085575181 | 0.158041568 | CCDC155     |
| ENSG00000247311 | 0.921306765 | 6.083544062 | -2.73280924  | 0.085624879 | 0.15812211  | AC010255.1  |
| ENSG00000166106 | 322.0859722 | 109.1022484 | 1.56068492   | 0.085638402 | 0.158135843 | ADAMTS15    |
| ENSG00000006837 | 37.95500112 | 18.95669375 | 0.995215341  | 0.085716842 | 0.158269439 | CDKL3       |
| ENSG00000068024 | 575.0295347 | 393.7319869 | 0.54571909   | 0.085765227 | 0.158347524 | HDAC4       |
| ENSG00000160229 | 8.976098803 | 2.129777466 | 2.070655046  | 0.085818804 | 0.158435184 | ZNF66       |
| ENSG00000272800 | 12.37059231 | 4.983245442 | 1.307344695  | 0.085877939 | 0.158523747 | AC021851.1  |
| ENSG00000280401 | 7.508640916 | 1.4981317   | 2.354294569  | 0.085878979 | 0.158523747 | AC022532.1  |

|                 |             |             |              |             |             |             |
|-----------------|-------------|-------------|--------------|-------------|-------------|-------------|
| ENSG00000236305 | 1.22840902  | 8.35740122  | -2.776774125 | 0.085888563 | 0.158530176 | SLC12A9-AS1 |
| ENSG00000119121 | 4.542241382 | 0.723690511 | 2.65792503   | 0.085905567 | 0.158539035 | TRPM6       |
| ENSG00000261794 | 4.542241382 | 0.723690511 | 2.65792503   | 0.085905567 | 0.158539035 | GOLGA8H     |
| ENSG00000257663 | 3.672619301 | 0           | 4.20944748   | 0.085931858 | 0.158576291 | AC025259.1  |
| ENSG00000129990 | 1.21705491  | 5.390535133 | -2.150561298 | 0.085987344 | 0.158667413 | SYT5        |
| ENSG00000187922 | 4.441450584 | 0.356539013 | 3.526018651  | 0.086009881 | 0.158687018 | LCN10       |
| ENSG00000286334 | 5.146345431 | 0.713078025 | 2.844876112  | 0.086010184 | 0.158687018 | AL161430.1  |
| ENSG00000135596 | 1883.184354 | 2407.804605 | -0.354406075 | 0.086047724 | 0.158745006 | MICAL1      |
| ENSG00000241520 | 7.833365525 | 1.753169357 | 2.145731278  | 0.08607873  | 0.158790931 | AC098820.3  |
| ENSG00000262185 | 37.04185699 | 14.69713881 | 1.326722708  | 0.086130767 | 0.158875644 | AC005736.1  |
| ENSG00000237593 | 5.306058071 | 0           | 4.742789318  | 0.086140076 | 0.158881536 | AL445220.1  |
| ENSG00000090932 | 9.550257474 | 35.2544931  | -1.887183539 | 0.086149052 | 0.158886812 | DLL3        |
| ENSG00000163900 | 284.7553915 | 389.0079702 | -0.450917626 | 0.086155411 | 0.158887262 | TMEM41A     |
| ENSG00000197429 | 243.2332204 | 335.7872799 | -0.466089992 | 0.08623617  | 0.159024908 | IPP         |
| ENSG00000280087 | 7.833365525 | 1.456837632 | 2.435764246  | 0.086283642 | 0.159097668 | AC011481.3  |
| ENSG00000153707 | 21.73731782 | 51.72153113 | -1.253908364 | 0.086287873 | 0.159097668 | PTPRD       |
| ENSG00000179604 | 1461.912727 | 1107.423777 | 0.400360441  | 0.086300523 | 0.1591097   | CDC42EP4    |
| ENSG00000007933 | 505.5008764 | 40.66206206 | 3.635314214  | 0.0863269   | 0.159147037 | FMO3        |
| ENSG00000168334 | 8.061131553 | 25.47422788 | -1.652666965 | 0.086362905 | 0.159202116 | XIRP1       |
| ENSG00000163877 | 320.5728573 | 404.9871386 | -0.337027791 | 0.086396961 | 0.159253597 | SNIP1       |
| ENSG00000167332 | 4.858119179 | 0           | 4.613935786  | 0.086403434 | 0.159254229 | OR51E2      |
| ENSG00000226007 | 26.69637034 | 6.836760279 | 1.964854815  | 0.086425068 | 0.159282805 | BX005266.2  |
| ENSG00000172061 | 48.2421354  | 168.7440021 | -1.806431777 | 0.086524925 | 0.15945553  | LRRC15      |
| ENSG00000112592 | 284.598087  | 377.7746733 | -0.408117827 | 0.086548458 | 0.159487586 | TBP         |
| ENSG00000109606 | 2253.330177 | 3101.187506 | -0.46074219  | 0.086596708 | 0.159565182 | DHX15       |
| ENSG00000246339 | 34.32779826 | 12.18844149 | 1.487278811  | 0.086614287 | 0.159586255 | EXTL3-AS1   |
| ENSG00000210112 | 13.29315273 | 5.757686631 | 1.209485234  | 0.08663981  | 0.159611237 | MT-TM       |
| ENSG00000270049 | 63.42253517 | 31.50167425 | 1.004828498  | 0.086640132 | 0.159611237 | AC009061.2  |
| ENSG00000273270 | 203.0391815 | 115.0046099 | 0.818269532  | 0.086672884 | 0.159660252 | AC090114.2  |
| ENSG00000177679 | 51.74103846 | 23.42986387 | 1.139837508  | 0.086723516 | 0.159742196 | SRRM3       |
| ENSG00000264520 | 5.395494759 | 0.713078025 | 2.914962731  | 0.086758066 | 0.159794507 | AC005154.4  |
| ENSG00000242457 | 0.61420451  | 4.688069593 | -2.942016975 | 0.086835874 | 0.15992648  | RBBP4P2     |
| ENSG00000108551 | 86.19029846 | 181.9318016 | -1.077086711 | 0.086843554 | 0.159929287 | RASD1       |
| ENSG00000280383 | 18.10223706 | 38.94744266 | -1.105250697 | 0.086943181 | 0.160101409 | Z95331.1    |
| ENSG00000205670 | 57.45756816 | 25.73414582 | 1.160028363  | 0.086972652 | 0.160144328 | SMIM11A     |
| ENSG00000110011 | 637.2827805 | 447.7706777 | 0.509270371  | 0.087003193 | 0.160189211 | DNAJC4      |
| ENSG00000131043 | 638.7960547 | 869.8073029 | -0.44575906  | 0.08704233  | 0.160225929 | AAR2        |
| ENSG00000276649 | 14.2094449  | 5.768299117 | 1.303699378  | 0.087046019 | 0.160225929 | AL117335.1  |
| ENSG00000110090 | 1561.935577 | 1128.941122 | 0.468081725  | 0.087047257 | 0.160225929 | CPT1A       |
| ENSG00000013275 | 95.14598323 | 179.8914525 | -0.918586549 | 0.087047804 | 0.160225929 | PSMC4       |
| ENSG00000125845 | 114.5116164 | 266.5289056 | -1.218547071 | 0.087071698 | 0.160258557 | BMP2        |
| ENSG00000186104 | 251.9141131 | 177.4549539 | 0.50688616   | 0.087286465 | 0.160642463 | CYP2R1      |
| ENSG00000085382 | 439.5245729 | 297.3946615 | 0.564223427  | 0.08730872  | 0.16067204  | HACE1       |
| novel.776       | 15.0038477  | 3.068367442 | 2.27040232   | 0.087383136 | 0.160797597 | -           |
| ENSG00000123992 | 817.6540644 | 1033.794377 | -0.338144784 | 0.087472377 | 0.160932699 | DNPEP       |
| ENSG00000259194 | 5.030439577 | 0           | 4.665730775  | 0.08747304  | 0.160932699 | AC020891.1  |
| ENSG00000099875 | 1966.448983 | 2865.077552 | -0.5428606   | 0.087475139 | 0.160932699 | MKKNK2      |
| ENSG00000249084 | 0           | 2.842855491 | -4.090354321 | 0.087501288 | 0.160969409 | AC027627.1  |
| ENSG00000205758 | 602.265006  | 444.6320852 | 0.438012035  | 0.087510633 | 0.160975202 | CRYZL1      |
| ENSG00000275120 | 14.22072773 | 6.175588807 | 1.210967127  | 0.087517932 | 0.16097723  | AC048382.5  |
| ENSG00000187848 | 0.307102255 | 3.220619475 | -3.307358633 | 0.087536639 | 0.16099884  | P2RX2       |

|                 |             |             |              |             |             |            |
|-----------------|-------------|-------------|--------------|-------------|-------------|------------|
| ENSG00000136315 | 2.990361403 | 0           | 3.915878638  | 0.087550099 | 0.16099884  | AL355922.1 |
| ENSG00000083307 | 2.990361403 | 0           | 3.915878638  | 0.087550099 | 0.16099884  | GRHL2      |
| ENSG00000236432 | 52.47057936 | 27.29518174 | 0.936274181  | 0.087554467 | 0.16099884  | AC097662.1 |
| ENSG00000236739 | 9.102105118 | 19.53514869 | -1.105892412 | 0.087582404 | 0.161038815 | CLIC4P1    |
| ENSG00000111077 | 3398.790064 | 2279.37053  | 0.576305147  | 0.087632462 | 0.161090855 | TNS2       |
| ENSG00000264345 | 4.918650674 | 0           | 4.631077628  | 0.087633439 | 0.161090855 | LINC01894  |
| ENSG00000211452 | 9.444452081 | 2.069570178 | 2.167912092  | 0.087640141 | 0.161090855 | DIO1       |
| ENSG00000164808 | 998.5385754 | 794.6150334 | 0.329246244  | 0.087641461 | 0.161090855 | SPIDR      |
| ENSG00000272482 | 34.99576748 | 11.69817848 | 1.591864651  | 0.087641709 | 0.161090855 | AC254633.1 |
| ENSG00000286623 | 4.542241382 | 0.743759607 | 2.642221706  | 0.087696757 | 0.161180635 | AC005041.4 |
| ENSG00000228146 | 9.180258968 | 1.874739808 | 2.313775237  | 0.087710171 | 0.161193885 | CASP16P    |
| ENSG00000279198 | 29.38260715 | 57.5331321  | -0.966678496 | 0.087734712 | 0.161227583 | AC008894.3 |
| ENSG00000266897 | 0.293240848 | 3.220619475 | -3.307357164 | 0.087776196 | 0.161292407 | AC005546.1 |
| ENSG00000109920 | 188.0707645 | 106.7328321 | 0.817262604  | 0.087844883 | 0.161407206 | FNBP4      |
| ENSG00000250011 | 3.66251884  | 0.356539013 | 3.243135025  | 0.087869116 | 0.161440315 | HMGB1P3    |
| ENSG00000277149 | 89.33710976 | 43.56456408 | 1.036102752  | 0.087891841 | 0.16147065  | TYW1B      |
| ENSG00000130038 | 52.83208706 | 111.8655511 | -1.084307916 | 0.087927621 | 0.161524961 | CRACR2A    |
| ENSG00000162999 | 74.46589297 | 37.29119834 | 0.99379401   | 0.087953173 | 0.161552022 | DUSP19     |
| ENSG00000275215 | 15.95391712 | 3.12857473  | 2.338420467  | 0.087954788 | 0.161552022 | RNA5-8SN3  |
| ENSG00000203896 | 123.6489391 | 79.59362676 | 0.635158206  | 0.087994688 | 0.161613882 | LIME1      |
| ENSG00000287401 | 5.127469429 | 0.672939833 | 2.877441377  | 0.088082623 | 0.161763952 | AC034139.1 |
| ENSG00000231367 | 3.665026137 | 0.336469917 | 3.243983704  | 0.088098942 | 0.161782485 | LINC02613  |
| ENSG00000177683 | 454.9479087 | 352.5387533 | 0.367870121  | 0.088132962 | 0.16183352  | THAP5      |
| ENSG00000105821 | 406.1859488 | 549.0251675 | -0.435203291 | 0.088146578 | 0.161835913 | DNAJC2     |
| ENSG00000224940 | 6.411252807 | 1.110911105 | 2.549850649  | 0.088146723 | 0.161835913 | PRRT4      |
| ENSG00000226318 | 8.77738051  | 17.86456747 | -1.026794032 | 0.088166038 | 0.161859938 | RPS3AP38   |
| ENSG00000266129 | 0.923814062 | 7.763453501 | -3.076666513 | 0.088217033 | 0.161926783 | SRP68P1    |
| ENSG00000251229 | 1.201939854 | 5.339784455 | -2.148627699 | 0.088219112 | 0.161926783 | AL645924.2 |
| ENSG00000279407 | 15.16975731 | 27.40369957 | -0.856973266 | 0.088224647 | 0.161926783 | AC007191.1 |
| ENSG00000234925 | 3.916682763 | 0.387220594 | 3.342423649  | 0.088227379 | 0.161926783 | ATP5PDP4   |
| ENSG00000174799 | 165.286474  | 236.5758692 | -0.518156703 | 0.088281054 | 0.162010633 | CEP135     |
| ENSG00000173013 | 30.02607286 | 51.69619656 | -0.781386323 | 0.088285537 | 0.162010633 | CCDC96     |
| ENSG00000276449 | 15.07398111 | 5.992655192 | 1.322224365  | 0.088303869 | 0.162032829 | AC004076.2 |
| ENSG00000259200 | 0           | 4.585283968 | -4.773715044 | 0.088325053 | 0.162060254 | AC068722.1 |
| ENSG00000120709 | 754.8562493 | 1046.246448 | -0.470619496 | 0.088347129 | 0.162089312 | FAM53C     |
| ENSG00000273173 | 8.495493772 | 2.446178286 | 1.777854822  | 0.088361312 | 0.162103887 | SNURF      |
| ENSG00000244227 | 3.269740843 | 0           | 4.045187448  | 0.088405058 | 0.162149793 | LRRRC77P   |
| ENSG00000148795 | 3.269740843 | 0           | 4.045187448  | 0.088405058 | 0.162149793 | CYP17A1    |
| ENSG00000233334 | 3.269740843 | 0           | 4.045187448  | 0.088405058 | 0.162149793 | FAM53B-AS1 |
| ENSG00000261728 | 3.268487194 | 0           | 4.044685025  | 0.088450589 | 0.162210401 | AL138690.1 |
| ENSG00000250156 | 3.268487194 | 0           | 4.044685025  | 0.088450589 | 0.162210401 | LINC02060  |
| ENSG00000286977 | 37.7912428  | 17.5304093  | 1.108606559  | 0.088610485 | 0.162492166 | Z83745.1   |
| ENSG00000231304 | 3.916682763 | 0.356539013 | 3.342420445  | 0.088635535 | 0.162526631 | SGO1-AS1   |
| novel.569       | 20.04188009 | 0           | 6.658460466  | 0.088645265 | 0.162533001 | -          |
| ENSG00000188959 | 0.293240848 | 3.189937893 | -3.296195333 | 0.088692203 | 0.162596113 | C9orf152   |
| ENSG00000237560 | 0.293240848 | 3.189937893 | -3.296195333 | 0.088692203 | 0.162596113 | LINC01497  |
| novel.637       | 32.31669655 | 68.88803381 | -1.090936928 | 0.088699693 | 0.162598372 | -          |
| ENSG00000255624 | 5.457208632 | 15.11504099 | -1.474688674 | 0.088833167 | 0.162831559 | AC073585.1 |
| ENSG00000263272 | 88.09315911 | 53.15894197 | 0.730857933  | 0.088849554 | 0.162846149 | AC004148.2 |
| ENSG00000135966 | 604.4222708 | 428.2545699 | 0.496370541  | 0.088857693 | 0.162846149 | TGFBRAP1   |
| ENSG00000260448 | 11.48076931 | 23.06271238 | -1.008814079 | 0.088859931 | 0.162846149 | LCMT1-AS1  |

|                 |             |             |              |             |             |             |
|-----------------|-------------|-------------|--------------|-------------|-------------|-------------|
| ENSG00000274642 | 5.157699541 | 13.79753115 | -1.424365339 | 0.088924232 | 0.162952495 | AC244669.2  |
| ENSG00000110321 | 9873.507501 | 13586.26461 | -0.460542068 | 0.089036644 | 0.163146982 | EIF4G2      |
| ENSG00000233527 | 45.72568386 | 67.37103607 | -0.559709612 | 0.089161779 | 0.163364752 | ZNF529-AS1  |
| ENSG00000259342 | 0.308355904 | 4.911141399 | -3.909909733 | 0.089236535 | 0.16348353  | AC025580.1  |
| novel.426       | 183.5492935 | 104.6403203 | 0.812450401  | 0.089239191 | 0.16348353  | -           |
| ENSG00000164074 | 255.8266789 | 182.8542693 | 0.48410039   | 0.089257153 | 0.163502293 | ABHD18      |
| ENSG00000285680 | 5.223245632 | 0           | 4.717887705  | 0.089262019 | 0.163502293 | AL355481.1  |
| ENSG00000148737 | 300.8138607 | 228.6770694 | 0.395438049  | 0.089281591 | 0.163526614 | TCF7L2      |
| ENSG00000276234 | 21.81504439 | 45.1550445  | -1.052919968 | 0.089373705 | 0.16368379  | TADA2A      |
| ENSG00000183337 | 589.6164298 | 858.1063422 | -0.54101007  | 0.089467002 | 0.163843109 | BCOR        |
| ENSG00000117410 | 1966.198322 | 2413.199356 | -0.295506788 | 0.089491312 | 0.163876077 | ATP6V0B     |
| ENSG00000142751 | 622.300475  | 772.7732441 | -0.312319486 | 0.089500771 | 0.163881848 | GPN2        |
| ENSG00000197361 | 18.56174353 | 5.584209627 | 1.722337384  | 0.089554693 | 0.163969027 | FBXL22      |
| ENSG00000134900 | 964.2847584 | 1256.533441 | -0.381903558 | 0.089581979 | 0.164007427 | TPP2        |
| ENSG00000270661 | 4.832974932 | 0.743759607 | 2.730395042  | 0.089597767 | 0.164024774 | Z99289.2    |
| ENSG00000044446 | 351.0161407 | 465.7914652 | -0.407593746 | 0.089679394 | 0.164162639 | PHKA2       |
| ENSG00000260911 | 18.35131512 | 8.060941101 | 1.198463586  | 0.089708796 | 0.164204891 | AC135050.3  |
| ENSG00000278384 | 31.73347726 | 4.849778236 | 2.716551493  | 0.089743629 | 0.164257079 | AL354822.1  |
| ENSG00000260279 | 23.20914956 | 59.37397949 | -1.353340121 | 0.089816385 | 0.164378662 | AC137932.1  |
| ENSG00000137338 | 218.0767356 | 155.5108583 | 0.487906386  | 0.089831277 | 0.164394338 | PGBD1       |
| ENSG00000174695 | 1739.519003 | 2300.726068 | -0.403438448 | 0.089880836 | 0.164473447 | TMEM167A    |
| ENSG00000090924 | 999.5486903 | 1398.383167 | -0.484674023 | 0.089948771 | 0.16458617  | PLEKHG2     |
| ENSG00000232520 | 5.193015519 | 0           | 4.70981805   | 0.089989611 | 0.164649303 | AC012507.2  |
| ENSG00000162402 | 1617.675716 | 1214.033472 | 0.41416322   | 0.090004189 | 0.164664379 | USP24       |
| ENSG00000258302 | 11.99042207 | 4.371668772 | 1.466592141  | 0.090015413 | 0.164673316 | AC025034.1  |
| ENSG00000176371 | 71.87393742 | 111.9907519 | -0.638067887 | 0.090044955 | 0.164715762 | ZSCAN2      |
| ENSG00000228492 | 46.48796217 | 21.74879856 | 1.091509316  | 0.090060175 | 0.164732005 | RAB11FIP1P1 |
| ENSG00000224215 | 9.376469963 | 2.893606169 | 1.700803762  | 0.090154787 | 0.164893455 | AL606469.1  |
| ENSG00000221571 | 3.983482502 | 0.387220594 | 3.363987793  | 0.090192552 | 0.164939304 | RNU6ATAC35P |
| ENSG00000248840 | 3.983482502 | 0.387220594 | 3.363987793  | 0.090192552 | 0.164939304 | AL645949.1  |
| ENSG00000100154 | 470.2024598 | 320.4305919 | 0.552783276  | 0.090219339 | 0.164976679 | TTC28       |
| ENSG00000115459 | 520.5725716 | 395.41408   | 0.396591472  | 0.090295022 | 0.165099408 | ELMOD3      |
| ENSG00000276846 | 12.4650436  | 3.485113743 | 1.823736595  | 0.090299534 | 0.165099408 | AC016590.3  |
| ENSG00000178403 | 3.063429386 | 0           | 3.947263143  | 0.090318228 | 0.165099408 | NEUROG2     |
| ENSG00000225924 | 3.063429386 | 0           | 3.947263143  | 0.090318228 | 0.165099408 | TAB2-AS1    |
| ENSG00000255733 | 3.063429386 | 0           | 3.947263143  | 0.090318228 | 0.165099408 | IFNG-AS1    |
| ENSG00000067829 | 938.1028266 | 1269.932742 | -0.436637726 | 0.090350442 | 0.165143035 | IDH3G       |
| ENSG00000158427 | 4.230124532 | 17.40066651 | -2.042627863 | 0.090364741 | 0.165143035 | TMSB15B     |
| ENSG00000152932 | 3.062175737 | 0           | 3.946730459  | 0.09036752  | 0.165143035 | RAB3C       |
| ENSG00000254636 | 3.062175737 | 0           | 3.946730459  | 0.09036752  | 0.165143035 | ARMS2       |
| ENSG00000212994 | 6.917144626 | 16.36874752 | -1.241897431 | 0.09038357  | 0.165150248 | RPS26P6     |
| novel.63        | 10.15185422 | 31.08120353 | -1.617669282 | 0.09038418  | 0.165150248 | -           |
| ENSG00000261168 | 14.39207922 | 3.404837359 | 2.058255771  | 0.09066836  | 0.165657853 | AL592424.1  |
| ENSG00000172339 | 241.7930584 | 151.2306863 | 0.675239838  | 0.090703378 | 0.165710179 | ALG14       |
| ENSG00000278743 | 15.74997077 | 6.573421887 | 1.269826142  | 0.090787341 | 0.165851913 | AC087239.1  |
| ENSG00000089006 | 1618.7675   | 2173.85499  | -0.425532414 | 0.09081123  | 0.16588389  | SNX5        |
| ENSG00000089327 | 1235.190466 | 2075.466214 | -0.74871852  | 0.090833056 | 0.165912093 | FXDY5       |
| ENSG00000162384 | 1137.149379 | 913.9442392 | 0.315268695  | 0.090890601 | 0.166005532 | CZIB        |
| ENSG00000225580 | 5.47107004  | 14.45271364 | -1.407411429 | 0.090932498 | 0.166047366 | AL358942.1  |
| ENSG00000278828 | 3.352909287 | 10.54854185 | -1.661914095 | 0.090936437 | 0.166047366 | HIST1H3H    |
| ENSG00000114446 | 505.5150855 | 697.6627236 | -0.46506758  | 0.090938694 | 0.166047366 | IFT57       |

|                 |             |             |              |             |             |                |
|-----------------|-------------|-------------|--------------|-------------|-------------|----------------|
| ENSG00000156110 | 644.9660085 | 801.2788649 | -0.312855461 | 0.09093907  | 0.166047366 | ADK            |
| ENSG00000231995 | 8.685436524 | 1.161661783 | 2.94323676   | 0.09095476  | 0.166064344 | AL590399.4     |
| ENSG00000273164 | 4.573725143 | 0.723690511 | 2.665986611  | 0.090963149 | 0.16606799  | DGCR10         |
| ENSG00000267224 | 4.720830024 | 0.387220594 | 3.613960559  | 0.090987535 | 0.166097178 | AC005498.1     |
| ENSG00000228409 | 114.4867298 | 73.57041838 | 0.636547276  | 0.090991922 | 0.166097178 | CCT6P1         |
| ENSG00000116675 | 362.889574  | 164.9322383 | 1.136617495  | 0.091068529 | 0.166225337 | DNAJC6         |
| ENSG00000246560 | 23.98872205 | 12.40321256 | 0.944474584  | 0.091108848 | 0.166287248 | UBE2D3-AS1     |
| ENSG00000267096 | 2.388764651 | 8.397411017 | -1.801006842 | 0.091120736 | 0.166297263 | AC008735.1     |
| ENSG00000137767 | 451.6248016 | 793.1618355 | -0.812204    | 0.091138707 | 0.166318378 | SQOR           |
| ENSG00000288049 | 8.482814742 | 0.713078025 | 3.567585369  | 0.091162317 | 0.16634978  | AC010889.2     |
| ENSG00000114956 | 607.5292223 | 797.7394648 | -0.392923461 | 0.091170863 | 0.16635369  | DGUOK          |
| ENSG00000228672 | 54.06286083 | 103.2454537 | -0.935090777 | 0.091206205 | 0.16640649  | PROB1          |
| ENSG00000240764 | 6.27647095  | 21.12057324 | -1.74602223  | 0.091254781 | 0.166481252 | PCDHGC5        |
| ENSG00000102362 | 188.3554711 | 133.0987049 | 0.501174693  | 0.091268614 | 0.166481252 | SYTL4          |
| ENSG00000128713 | 0           | 4.414247109 | -4.727480654 | 0.091283627 | 0.166481252 | HOXD11         |
| ENSG00000198563 | 0           | 4.414247109 | -4.727480654 | 0.091283627 | 0.166481252 | DDX39B         |
| ENSG00000112246 | 0           | 4.414247109 | -4.727480654 | 0.091283627 | 0.166481252 | SIM1           |
| ENSG00000105982 | 37.31049523 | 20.32007397 | 0.88188743   | 0.09128775  | 0.166481252 | RNF32          |
| ENSG00000156381 | 347.7256844 | 514.8220677 | -0.566590781 | 0.091292037 | 0.166481252 | ANKRD9         |
| ENSG00000101019 | 798.7966875 | 1018.523826 | -0.350265204 | 0.091300241 | 0.166484529 | UQCC1          |
| ENSG00000158050 | 170.4502711 | 43.3136832  | 1.974591816  | 0.091450375 | 0.166746591 | DUSP2          |
| ENSG00000182541 | 1001.098921 | 744.7551769 | 0.4271863    | 0.091461937 | 0.166753329 | LIMK2          |
| ENSG00000127252 | 5.155192243 | 0.672939833 | 2.885256528  | 0.091466906 | 0.166753329 | PLAAT1         |
| ENSG00000254901 | 198.9421583 | 295.9101091 | -0.572607798 | 0.091494404 | 0.166791756 | BORCS8         |
| ENSG00000104412 | 975.0263418 | 775.007173  | 0.331570527  | 0.091505286 | 0.16679989  | EMC2           |
| ENSG00000166908 | 544.0254836 | 299.4670354 | 0.860461879  | 0.091519827 | 0.166814693 | PIP4K2C        |
| ENSG00000277968 | 5.469816391 | 13.92971409 | -1.351835695 | 0.091538397 | 0.166836835 | RF02038        |
| ENSG00000153140 | 366.7167759 | 508.2747383 | -0.471125545 | 0.091568887 | 0.166880699 | CETN3          |
| ENSG00000279794 | 5.43833263  | 14.07135364 | -1.369442156 | 0.091579999 | 0.166889243 | AC024580.1     |
| ENSG00000227354 | 80.51452662 | 42.90223674 | 0.908358427  | 0.091592058 | 0.166899513 | RBM26-AS1      |
| ENSG00000157306 | 18.35632971 | 7.725755454 | 1.239690074  | 0.091609677 | 0.166919912 | ZFHX2-AS1      |
| ENSG00000235770 | 149.3527426 | 47.95031297 | 1.639152517  | 0.091698053 | 0.167053928 | LINC00607      |
| ENSG00000230773 | 7.486003968 | 1.773238453 | 2.072084776  | 0.091700621 | 0.167053928 | AC092650.1     |
| ENSG00000279170 | 214.5203781 | 134.1460698 | 0.679489043  | 0.091702518 | 0.167053928 | TSTD3          |
| ENSG00000203814 | 16.66250199 | 4.625550555 | 1.84521927   | 0.091754735 | 0.167137333 | HIST2H2BF      |
| ENSG00000136560 | 951.0267906 | 726.4713887 | 0.388695928  | 0.091812536 | 0.167230897 | TANK           |
| ENSG00000170801 | 386.3129516 | 150.3554673 | 1.361070855  | 0.091864865 | 0.167306899 | HTRA3          |
| ENSG00000058866 | 38.63872613 | 19.70990996 | 0.964094217  | 0.091867142 | 0.167306899 | DGKG           |
| ENSG00000102890 | 107.3125579 | 67.1904142  | 0.675450391  | 0.091903271 | 0.167348674 | ELMO3          |
| ENSG00000213782 | 66.69421384 | 33.03035914 | 1.01287302   | 0.091907075 | 0.167348674 | DDX47          |
| ENSG00000102096 | 133.5322969 | 234.5152423 | -0.812175977 | 0.091909404 | 0.167348674 | PIM2           |
| ENSG00000176912 | 21.09879544 | 38.69831277 | -0.876071753 | 0.091930205 | 0.167374817 | TYMSOS         |
| ENSG00000277684 | 5.544138023 | 0.336469917 | 3.841490725  | 0.091962936 | 0.167404506 | AL392048.1     |
| ENSG00000273343 | 12.69531692 | 5.381078522 | 1.238675824  | 0.091964793 | 0.167404506 | AC007663.4     |
| ENSG00000286498 | 4.84683634  | 0.743759607 | 2.733512249  | 0.091971494 | 0.167404506 | AL132982.1     |
| ENSG00000184906 | 3.021845164 | 0           | 3.929419929  | 0.09197883  | 0.167404506 | AMYH02020865.1 |
| ENSG00000284685 | 3.021845164 | 0           | 3.929419929  | 0.09197883  | 0.167404506 | AC009093.10    |
| ENSG00000249485 | 18.76547641 | 32.44830817 | -0.792058223 | 0.091985171 | 0.167404506 | RBBP4P1        |
| ENSG00000112782 | 27.93459474 | 9.061022635 | 1.616042095  | 0.092041004 | 0.167494385 | CLIC5          |
| ENSG00000147400 | 723.7423308 | 968.0471394 | -0.419329043 | 0.092073986 | 0.16754267  | CETN2          |
| ENSG00000064655 | 559.4871687 | 184.437185  | 1.600328542  | 0.092095481 | 0.167570045 | EYA2           |



|                 |             |             |              |             |             |             |
|-----------------|-------------|-------------|--------------|-------------|-------------|-------------|
| ENSG00000118513 | 0.921306765 | 6.003267678 | -2.715635461 | 0.092116324 | 0.167596233 | MYB         |
| ENSG00000276250 | 6.986451663 | 1.4981317   | 2.249644378  | 0.09213449  | 0.167617546 | AC127024.6  |
| ENSG00000225449 | 3.016830569 | 0           | 3.927266476  | 0.092181924 | 0.1676921   | RAB6C-AS1   |
| ENSG00000262155 | 69.32481939 | 38.99806494 | 0.832221385  | 0.092220117 | 0.167749832 | LINC02175   |
| ENSG00000186432 | 1478.938675 | 1912.108892 | -0.370749837 | 0.092261184 | 0.167803716 | KPNA4       |
| ENSG00000223714 | 6.359639395 | 1.487519214 | 2.121851669  | 0.092262657 | 0.167803716 | LINC02601   |
| ENSG00000163281 | 427.4879073 | 565.0042543 | -0.402778028 | 0.09232471  | 0.167904823 | GNPDA2      |
| ENSG00000235172 | 14.20783524 | 2.731897526 | 2.362321928  | 0.092371928 | 0.167978937 | LINC01366   |
| ENSG00000115977 | 708.4292299 | 918.0038476 | -0.373684359 | 0.092391669 | 0.168003077 | AAK1        |
| ENSG00000229666 | 2.459325337 | 9.935809303 | -2.023301425 | 0.092426465 | 0.168054586 | MAST4-AS1   |
| ENSG00000091640 | 1112.076632 | 1375.120989 | -0.306253287 | 0.092471009 | 0.168123813 | SPAG7       |
| ENSG00000223935 | 5.379126054 | 0.713078025 | 2.911122994  | 0.092487219 | 0.168141518 | LGALS1-DT   |
| ENSG00000226874 | 4.554849141 | 0.693008929 | 2.684233918  | 0.092504992 | 0.168162063 | AC005154.1  |
| ENSG00000197483 | 124.7106118 | 167.7059782 | -0.427156439 | 0.092514973 | 0.168168439 | ZNF628      |
| ENSG00000143196 | 4.616563014 | 0           | 4.539490029  | 0.092561455 | 0.168241162 | DPT         |
| ENSG00000108175 | 1570.326292 | 2400.926182 | -0.612407367 | 0.092592106 | 0.168247098 | ZMIZ1       |
| ENSG00000231437 | 3.006730108 | 0           | 3.922891618  | 0.092594129 | 0.168247098 | LINC01750   |
| ENSG00000114204 | 3.006730108 | 0           | 3.922891618  | 0.092594129 | 0.168247098 | SERPINI2    |
| ENSG00000279771 | 3.006730108 | 0           | 3.922891618  | 0.092594129 | 0.168247098 | AP000997.3  |
| novel.132       | 4.615309366 | 0           | 4.539116029  | 0.0925971   | 0.168247098 | -           |
| ENSG00000269235 | 21.01333316 | 6.633629175 | 1.67097113   | 0.092605688 | 0.168250935 | ZNF350-AS1  |
| ENSG00000226314 | 32.97832625 | 15.09368762 | 1.129354325  | 0.092644989 | 0.168310569 | ZNF192P1    |
| ENSG00000106034 | 884.2348488 | 512.5575475 | 0.78710781   | 0.092663561 | 0.16833254  | CPED1       |
| ENSG00000261222 | 4.285498891 | 0.336469917 | 3.469877277  | 0.09273729  | 0.168403458 | AC064805.1  |
| ENSG00000288039 | 4.285498891 | 0.336469917 | 3.469877277  | 0.09273729  | 0.168403458 | AC098969.2  |
| ENSG00000231769 | 3.002969161 | 0           | 3.921270777  | 0.092747973 | 0.168403458 | AL035701.1  |
| ENSG00000265643 | 3.002969161 | 0           | 3.921270777  | 0.092747973 | 0.168403458 | AC119868.2  |
| ENSG00000224014 | 3.002969161 | 0           | 3.921270777  | 0.092747973 | 0.168403458 | AL390728.3  |
| ENSG00000286492 | 3.002969161 | 0           | 3.921270777  | 0.092747973 | 0.168403458 | AC117509.1  |
| ENSG00000287822 | 3.002969161 | 0           | 3.921270777  | 0.092747973 | 0.168403458 | AC098679.6  |
| ENSG00000227885 | 9.363862205 | 2.618499415 | 1.862441707  | 0.092816293 | 0.168515731 | AL590652.1  |
| ENSG00000132517 | 10.1152846  | 1.41669944  | 2.828968011  | 0.092830011 | 0.16852886  | SLC52A1     |
| ENSG00000214776 | 9.396599615 | 3.159256312 | 1.557262468  | 0.09287759  | 0.168603456 | AC092821.1  |
| ENSG00000173875 | 684.0845564 | 522.200762  | 0.38995814   | 0.092937513 | 0.168700449 | ZNF791      |
| ENSG00000279970 | 6.126858772 | 1.10029862  | 2.490031116  | 0.092947886 | 0.168707491 | AC023024.2  |
| ENSG00000170577 | 66.42524707 | 14.67360209 | 2.175772899  | 0.092955403 | 0.168709348 | SIX2        |
| ENSG00000278600 | 89.19061849 | 47.92086848 | 0.898244522  | 0.093019794 | 0.168814422 | AC015871.3  |
| ENSG00000273035 | 5.058162392 | 0.723690511 | 2.815618133  | 0.0930884   | 0.16892713  | AC007684.1  |
| ENSG00000116663 | 222.6969452 | 159.6694257 | 0.481361611  | 0.093135217 | 0.168997441 | FBXO6       |
| ENSG00000131269 | 320.677765  | 427.7693031 | -0.415192345 | 0.093140155 | 0.168997441 | ABC7        |
| ENSG00000287979 | 5.369025593 | 0.336469917 | 3.797896205  | 0.093157343 | 0.169016825 | AC253572.2  |
| ENSG00000118922 | 660.101545  | 465.1128401 | 0.504687717  | 0.093169396 | 0.16902689  | KLF12       |
| ENSG00000244165 | 159.2425424 | 99.88648678 | 0.673120017  | 0.09321428  | 0.16909651  | P2RY11      |
| ENSG00000245112 | 13.82418879 | 28.44147915 | -1.040535774 | 0.093238164 | 0.169128028 | SMARCA5-AS1 |
| ENSG00000081803 | 68.15306621 | 121.6210768 | -0.836765421 | 0.093255334 | 0.169147363 | CADPS2      |
| ENSG00000104951 | 81.340271   | 273.3429814 | -1.748441992 | 0.093274407 | 0.169170147 | IL411       |
| ENSG00000206557 | 3.064683035 | 0           | 3.947835348  | 0.093322971 | 0.169223241 | TRIM71      |
| ENSG00000145103 | 3.064683035 | 0           | 3.947835348  | 0.093322971 | 0.169223241 | ILDR1       |
| ENSG00000276075 | 22.93291816 | 9.078651586 | 1.339391124  | 0.093323221 | 0.169223241 | AC027682.6  |
| ENSG00000254180 | 4.546002329 | 0.743759607 | 2.642361001  | 0.093408945 | 0.169366864 | AC004083.1  |
| ENSG00000138075 | 3.060922088 | 0           | 3.946233175  | 0.09347538  | 0.169475495 | ABC5        |

|                 |             |             |              |             |             |                        |
|-----------------|-------------|-------------|--------------|-------------|-------------|------------------------|
| ENSG00000163541 | 983.826814  | 1262.531807 | -0.360030364 | 0.093495634 | 0.169500389 | SUCLG1                 |
| ENSG00000115507 | 15.68943927 | 4.157925182 | 1.934911441  | 0.093509422 | 0.169506141 | OTX1                   |
| ENSG00000271335 | 27.36050734 | 44.41342107 | -0.700956176 | 0.093511856 | 0.169506141 | AL117336.2             |
| ENSG00000200253 | 7.547717841 | 1.345879667 | 2.448599578  | 0.093532139 | 0.16953108  | RNU6-529P              |
| ENSG00000138792 | 99.93260029 | 307.3861708 | -1.620929682 | 0.093726566 | 0.169871636 | ENPEP                  |
| ENSG00000269054 | 20.18382819 | 6.795466212 | 1.569400031  | 0.093777443 | 0.169951991 | AC012313.6             |
| ENSG00000075975 | 749.7763045 | 985.2211509 | -0.393734661 | 0.093821288 | 0.170019592 | MKRN2                  |
| ENSG00000276488 | 9.560073201 | 22.72624246 | -1.246999984 | 0.093878667 | 0.170101605 | AC008735.4             |
| ENSG00000261659 | 20.54512242 | 10.40561803 | 0.982064572  | 0.093879639 | 0.170101605 | Z92544.2               |
| novel.980       | 18.17523377 | 43.28261644 | -1.254419397 | 0.093988777 | 0.170287477 | -                      |
| ENSG00000068097 | 317.9180764 | 412.7774208 | -0.376037391 | 0.094006454 | 0.170307627 | HEATR6                 |
| novel.677       | 92.48886437 | 27.16890658 | 1.764123993  | 0.094019631 | 0.170319623 | -                      |
| ENSG00000257270 | 17.97615947 | 37.214214   | -1.04621123  | 0.094097908 | 0.170449539 | AL928654.2             |
| ENSG00000255182 | 46.99156015 | 28.13787417 | 0.742918943  | 0.094120873 | 0.170479253 | AC084125.2             |
| novel.473       | 523.6597766 | 866.618257  | -0.726859009 | 0.09416508  | 0.170547435 | -                      |
| ENSG00000158828 | 526.6527885 | 869.9377658 | -0.723746171 | 0.094183201 | 0.170568363 | PINK1                  |
| ENSG00000153071 | 991.1557761 | 1874.36048  | -0.919271383 | 0.094257281 | 0.170690627 | DAB2                   |
| ENSG00000284773 | 28.78129513 | 15.59186618 | 0.888867558  | 0.094313601 | 0.170780713 | AC114490.3             |
| ENSG00000184677 | 844.3060897 | 587.5538776 | 0.523368293  | 0.094339534 | 0.170815766 | ZBTB40                 |
| ENSG00000233387 | 0           | 4.106018629 | -4.615721553 | 0.094348853 | 0.170820735 | IATPR                  |
| ENSG00000237984 | 30.7751305  | 15.86812881 | 0.956418699  | 0.094414111 | 0.170926974 | PTENP1                 |
| ENSG00000142082 | 482.7772119 | 373.9654188 | 0.368283678  | 0.094447622 | 0.170975729 | SIRT3                  |
| ENSG00000255382 | 3.03696022  | 0           | 3.935934123  | 0.09445759  | 0.17098186  | AP001646.3             |
| ENSG00000197465 | 5.793287351 | 16.08901726 | -1.477173762 | 0.094475479 | 0.171000956 | GYPE                   |
| ENSG00000106328 | 3.590704505 | 0.356539013 | 3.218570976  | 0.09448642  | 0.171000956 | FSCN3                  |
| ENSG00000094880 | 584.1703614 | 742.2592883 | -0.345292017 | 0.094487884 | 0.171000956 | CDC23                  |
| ENSG00000124788 | 673.117754  | 437.6757967 | 0.621421372  | 0.094508344 | 0.171024689 | ATXN1                  |
| ENSG00000077684 | 416.239021  | 682.6676427 | -0.714149083 | 0.094514164 | 0.171024689 | JADE1                  |
| ENSG00000254477 | 13.17097863 | 4.239485835 | 1.629684392  | 0.09464138  | 0.171242962 | AP000640.1             |
| ENSG00000224721 | 9.867388919 | 0.387220594 | 4.674075952  | 0.094685255 | 0.171310419 | AC007182.1             |
| ENSG00000233342 | 3.030691976 | 0           | 3.933244719  | 0.094716624 | 0.17135524  | AL139393.2             |
| ENSG00000167011 | 0           | 4.136700211 | -4.625894247 | 0.094853941 | 0.171576867 | NAT16                  |
| ENSG00000269124 | 0           | 4.136700211 | -4.625894247 | 0.094853941 | 0.171576867 | AC007193.2             |
| ENSG00000135845 | 480.6619419 | 377.9802446 | 0.346712172  | 0.09485894  | 0.171576867 | PIGC                   |
| ENSG00000105499 | 312.7920462 | 117.4296791 | 1.414558891  | 0.094899251 | 0.171637831 | PLA2G4C                |
| novel.997       | 4.619070312 | 0           | 4.54025673   | 0.094930155 | 0.171680648 | -                      |
| ENSG00000272752 | 7.896404318 | 2.496928964 | 1.655785412  | 0.094936141 | 0.171680648 | STAG3L5P-PVRIG2P-PILRB |
| ENSG00000280079 | 7.517487729 | 17.90830168 | -1.254644231 | 0.094947245 | 0.171688779 | AC011447.7             |
| ENSG00000258806 | 2.726097019 | 0           | 3.780491529  | 0.095075287 | 0.171908346 | OR11H7                 |
| ENSG00000204623 | 0.293240848 | 4.514592589 | -3.798140485 | 0.095145429 | 0.172022399 | ZNRD1ASP               |
| ENSG00000104969 | 1600.063243 | 2054.011879 | -0.360258018 | 0.095151607 | 0.172022399 | SGTA                   |
| ENSG00000187601 | 905.0433967 | 653.8960775 | 0.469413705  | 0.095217937 | 0.172130337 | MAGEH1                 |
| ENSG00000250362 | 0.308355904 | 3.455588036 | -3.41617866  | 0.095233407 | 0.172146326 | AC008592.1             |
| ENSG00000174951 | 9.682247299 | 2.853467977 | 1.759088919  | 0.095248378 | 0.17216141  | FUT1                   |
| ENSG00000237836 | 5.466055445 | 1.130980201 | 2.310803451  | 0.095300415 | 0.172243485 | PHKA2-AS1              |
| ENSG00000104093 | 772.1223568 | 542.5177538 | 0.509645027  | 0.095350412 | 0.17232131  | DMXL2                  |
| ENSG00000015153 | 338.4956793 | 265.2266443 | 0.352037013  | 0.09535764  | 0.17232131  | YAF2                   |
| ENSG00000165953 | 0           | 4.075337048 | -4.60552429  | 0.095368454 | 0.17232131  | SERPINA12              |
| ENSG00000126214 | 1798.459394 | 1377.345461 | 0.384938521  | 0.095370006 | 0.17232131  | KLC1                   |
| ENSG00000258938 | 3.354162936 | 9.609951872 | -1.525308258 | 0.09548668  | 0.172520127 | AL162311.3             |
| ENSG00000251093 | 0           | 4.339831315 | -4.698375931 | 0.095495541 | 0.172524139 | AC093281.2             |

|                 |             |             |              |             |             |            |
|-----------------|-------------|-------------|--------------|-------------|-------------|------------|
| ENSG00000105171 | 485.3815183 | 644.1429703 | -0.408721819 | 0.095503519 | 0.172526556 | POP4       |
| ENSG00000228242 | 63.35384104 | 32.16374481 | 0.978330264  | 0.095569403 | 0.172628799 | AC093495.1 |
| ENSG00000102174 | 9.645748943 | 3.32212083  | 1.556964896  | 0.095573547 | 0.172628799 | PHEX       |
| novel.754       | 12.70917833 | 4.953719736 | 1.351541016  | 0.095580451 | 0.172628799 | -          |
| ENSG00000263220 | 5.347642293 | 0.387220594 | 3.792475237  | 0.095586694 | 0.172628799 | AC015727.1 |
| ENSG00000253878 | 27.99226293 | 14.27795237 | 0.967963935  | 0.095739824 | 0.172893332 | AC087752.3 |
| ENSG00000215277 | 12.31263939 | 3.270214277 | 1.918538167  | 0.095747886 | 0.172895873 | RNF212B    |
| novel.636       | 6.617564264 | 0.743759607 | 3.176636925  | 0.095795316 | 0.172958426 | -          |
| ENSG00000162490 | 11.82068024 | 24.75683032 | -1.070146777 | 0.095795841 | 0.172958426 | DRAXIN     |
| ENSG00000115592 | 5.657251845 | 0.713078025 | 2.984342242  | 0.095893082 | 0.173121963 | PRKAG3     |
| ENSG00000183023 | 369.3773544 | 175.316503  | 1.074091103  | 0.095912783 | 0.173145499 | SLC8A1     |
| ENSG00000205978 | 434.077349  | 597.953438  | -0.462573023 | 0.095960096 | 0.173218873 | NYNRIN     |
| ENSG00000237977 | 7.662370047 | 1.161661783 | 2.763702232  | 0.095973134 | 0.173219254 | EIF4HP2    |
| ENSG00000065621 | 70.57432697 | 138.2927058 | -0.970527169 | 0.095973641 | 0.173219254 | GSTO2      |
| ENSG00000264425 | 0           | 2.547679642 | -3.927636598 | 0.096052049 | 1           | MIR4653    |
| ENSG00000286468 | 4.495642565 | 0           | 4.502916901  | 0.096101467 | 0.173437914 | AC010251.1 |
| novel.576       | 8.942321208 | 0           | 5.493954769  | 0.096134857 | 0.173474074 | -          |
| ENSG00000286330 | 8.942321208 | 0           | 5.493954769  | 0.096134857 | 0.173474074 | AL353660.1 |
| ENSG00000175575 | 817.3357673 | 579.9841118 | 0.495095627  | 0.096177451 | 0.173537791 | PAAF1      |
| ENSG00000124067 | 3220.811899 | 2631.96497  | 0.29128811   | 0.096183526 | 0.173537791 | SLC12A4    |
| ENSG00000135916 | 3964.263305 | 2481.258427 | 0.675982762  | 0.096212698 | 0.17357837  | ITM2C      |
| ENSG00000171865 | 603.2691955 | 801.1123565 | -0.409335898 | 0.096272345 | 0.173663033 | RNASEH1    |
| ENSG00000276691 | 1.214547612 | 9.009116082 | -2.895588877 | 0.096272994 | 0.173663033 | AC004466.3 |
| ENSG00000162664 | 929.5824737 | 615.244606  | 0.594964417  | 0.09628409  | 0.173670989 | ZNF326     |
| ENSG00000147996 | 446.5227221 | 269.3907812 | 0.729068356  | 0.096413535 | 0.173892402 | CBWD5      |
| ENSG00000133454 | 0.925067711 | 7.060987961 | -2.937788584 | 0.096446319 | 0.173923803 | MYO18B     |
| ENSG00000180921 | 19.89943415 | 9.151911504 | 1.112175511  | 0.09644855  | 0.173923803 | FAM83H     |
| ENSG00000272769 | 2.989107754 | 0           | 3.915210835  | 0.096466525 | 0.173923803 | AC097532.2 |
| ENSG00000263883 | 2.989107754 | 0           | 3.915210835  | 0.096466525 | 0.173923803 | EEF1DP7    |
| ENSG00000163249 | 230.174387  | 343.1370692 | -0.576893658 | 0.096470466 | 0.173923803 | CCNYL1     |
| ENSG00000104131 | 1067.110973 | 1549.024833 | -0.53786011  | 0.096471835 | 0.173923803 | EIF3J      |
| ENSG00000143420 | 3059.416978 | 2496.875208 | 0.293162472  | 0.096478856 | 0.173923803 | ENSA       |
| ENSG00000285103 | 35.65441951 | 19.37087151 | 0.887167671  | 0.096484499 | 0.173923803 | AL451123.1 |
| ENSG00000091879 | 185.7429437 | 92.03034623 | 1.011723433  | 0.096575512 | 0.174064376 | ANGPT2     |
| ENSG00000215012 | 532.7141164 | 739.4601663 | -0.473197974 | 0.096575882 | 0.174064376 | RTL10      |
| ENSG00000260219 | 26.51986172 | 12.93322858 | 1.035253799  | 0.096624805 | 0.174140473 | AC106782.2 |
| ENSG00000154222 | 1392.332438 | 1011.675613 | 0.46069998   | 0.096678394 | 0.174224968 | CC2D1B     |
| ENSG00000273145 | 33.48729484 | 16.72400226 | 1.0052789    | 0.096701346 | 0.174254242 | BX537318.1 |
| ENSG00000184564 | 11.07942923 | 1.345879667 | 3.013099484  | 0.096708382 | 0.174254835 | SLITRK6    |
| ENSG00000259426 | 11.11195318 | 26.20318386 | -1.239698963 | 0.09679618  | 0.17440094  | AC027237.4 |
| ENSG00000249406 | 3.325186472 | 9.846076309 | -1.570961936 | 0.096812597 | 0.17440804  | AC015909.1 |
| ENSG00000224877 | 775.2222092 | 1110.917705 | -0.519344705 | 0.096813547 | 0.17440804  | NDUFAF8    |
| ENSG00000157404 | 149.5854223 | 17.54127858 | 3.090517204  | 0.096909051 | 0.174567985 | KIT        |
| ENSG00000165060 | 92.3868919  | 141.7265553 | -0.619008048 | 0.0969222   | 0.174579568 | FXN        |
| ENSG00000095397 | 39.75033166 | 75.09435137 | -0.919077859 | 0.096961198 | 0.174637705 | WHRN       |
| ENSG00000154479 | 11.655597   | 3.984448178 | 1.556184537  | 0.097054423 | 0.174793495 | CCDC173    |
| ENSG00000168556 | 164.0081325 | 233.727025  | -0.510608916 | 0.097098579 | 0.174852475 | ING2       |
| ENSG00000147206 | 4.48930305  | 0           | 4.500965169  | 0.097100631 | 0.174852475 | NXF3       |
| ENSG00000144648 | 23.53193634 | 6.869882006 | 1.763979621  | 0.097179964 | 0.174983203 | ACKR2      |
| novel.220       | 26.05999925 | 7.859094266 | 1.729333753  | 0.097209396 | 0.17502407  | -          |
| novel.635       | 201.5327618 | 108.4357175 | 0.895678482  | 0.097281922 | 0.175134946 | -          |

|                 |             |             |              |             |             |             |
|-----------------|-------------|-------------|--------------|-------------|-------------|-------------|
| ENSG00000149932 | 2079.171805 | 1549.064935 | 0.424774322  | 0.09728446  | 0.175134946 | TMEM219     |
| ENSG00000124107 | 19.91197064 | 8.022087178 | 1.300898346  | 0.097319749 | 0.175186338 | SLPI        |
| ENSG00000232872 | 4.481781158 | 0           | 4.498662638  | 0.09732948  | 0.175191716 | CTAGE3P     |
| ENSG00000166188 | 379.932645  | 545.235362  | -0.520494236 | 0.09738524  | 0.175279939 | ZNF319      |
| ENSG00000101974 | 462.7369693 | 668.7516919 | -0.531714536 | 0.097402233 | 0.17529838  | ATP11C      |
| ENSG00000132185 | 45.26750197 | 18.86079619 | 1.268425025  | 0.097437641 | 0.175337039 | FCRLA       |
| ENSG00000196081 | 5.676127848 | 16.20459873 | -1.508024741 | 0.097442985 | 0.175337039 | ZNF724      |
| ENSG00000278206 | 11.43542414 | 4.310305609 | 1.409445414  | 0.097443959 | 0.175337039 | AL031320.2  |
| ENSG00000150667 | 5.464801796 | 15.93064785 | -1.542857065 | 0.097523911 | 0.175468748 | FSIP1       |
| ENSG00000144827 | 541.752297  | 735.4598749 | -0.440948954 | 0.09753924  | 0.175484176 | ABHD10      |
| ENSG00000165507 | 1960.710589 | 1085.022302 | 0.853875898  | 0.097554503 | 0.175499483 | DEPP1       |
| ENSG00000136068 | 3400.051263 | 4638.590012 | -0.448077599 | 0.097734083 | 0.175810373 | FLNB        |
| ENSG00000163155 | 137.4878435 | 184.4316499 | -0.424924679 | 0.097776612 | 0.1758747   | LYSMD1      |
| ENSG00000229196 | 5.085885207 | 0.672939833 | 2.869071777  | 0.097830579 | 0.175959589 | AC087071.1  |
| ENSG00000279602 | 18.85713567 | 7.500243502 | 1.329873038  | 0.097852162 | 0.175986225 | AC109326.1  |
| ENSG00000151090 | 72.92815913 | 33.98529379 | 1.101896589  | 0.097871038 | 0.176006186 | THRB        |
| ENSG00000073756 | 298.2274039 | 772.1771693 | -1.372378012 | 0.097876809 | 0.176006186 | PTGS2       |
| ENSG00000159322 | 1429.547168 | 1766.766886 | -0.305525696 | 0.097909815 | 0.176053354 | ADPGK       |
| ENSG00000229766 | 5.9643541   | 1.029478846 | 2.504893711  | 0.097941484 | 0.176092262 | AL021396.1  |
| ENSG00000253203 | 0           | 4.044655466 | -4.595281195 | 0.097945009 | 0.176092262 | GUSBP3      |
| ENSG00000188822 | 4.931187162 | 0           | 4.634672784  | 0.098035551 | 0.17624285  | CNR2        |
| ENSG00000272444 | 6.360893044 | 1.803920035 | 1.822317681  | 0.098055812 | 0.176267076 | AL118558.4  |
| ENSG00000148090 | 422.7896155 | 269.465137  | 0.650777617  | 0.098065947 | 0.176267966 | AUH         |
| ENSG00000167114 | 436.038918  | 608.2187951 | -0.480578834 | 0.098073943 | 0.176267966 | SLC27A4     |
| ENSG00000277758 | 23.1041271  | 105.5332623 | -2.192714486 | 0.098076661 | 0.176267966 | FO681492.1  |
| ENSG00000077254 | 1420.531167 | 1146.203415 | 0.309690557  | 0.098115764 | 0.176326047 | USP33       |
| ENSG00000156414 | 26.72652918 | 7.34799147  | 1.856281818  | 0.098136517 | 0.176336844 | TDRD9       |
| ENSG00000213277 | 0.601596751 | 3.995060664 | -2.722273668 | 0.098139982 | 0.176336844 | MARCKSL1P1  |
| novel.1012      | 3.033199274 | 16.3004491  | -2.427508368 | 0.098142133 | 0.176336844 | -           |
| ENSG00000122824 | 19.3296059  | 52.00656122 | -1.427957154 | 0.098230555 | 0.176483511 | NUDT10      |
| ENSG00000225643 | 6.631425671 | 1.130980201 | 2.583884022  | 0.098292845 | 0.176583212 | AL606491.1  |
| ENSG00000226380 | 15.76222252 | 43.84745799 | -1.471289931 | 0.098399853 | 0.176756387 | AC016831.1  |
| ENSG00000198712 | 57316.46076 | 80399.53334 | -0.488240222 | 0.098403044 | 0.176756387 | MT-CO2      |
| ENSG00000286782 | 11.36110251 | 3.913628404 | 1.535529112  | 0.098409651 | 0.176756387 | AL355377.3  |
| ENSG00000136986 | 957.654982  | 1240.916159 | -0.373986302 | 0.098473814 | 0.176859406 | DERL1       |
| ENSG00000125997 | 3.32769377  | 0.356539013 | 3.106645492  | 0.098497423 | 0.17688958  | BPIFB9P     |
| ENSG00000267637 | 3.326440121 | 0.356539013 | 3.106192495  | 0.098534752 | 0.176925377 | AC040904.1  |
| ENSG00000231414 | 2.402626059 | 8.490740032 | -1.820284549 | 0.098551159 | 0.176925377 | AC016700.2  |
| ENSG00000110925 | 976.8645977 | 728.4694496 | 0.42347098   | 0.098555154 | 0.176925377 | CSRNP2      |
| ENSG00000225720 | 2.739958426 | 0           | 3.787004327  | 0.098563738 | 0.176925377 | AL031846.1  |
| ENSG00000261357 | 2.739958426 | 0           | 3.787004327  | 0.098563738 | 0.176925377 | AC099518.2  |
| ENSG00000204361 | 2.739958426 | 0           | 3.787004327  | 0.098563738 | 0.176925377 | NXPE2       |
| ENSG00000140443 | 1067.654165 | 1411.069458 | -0.402309837 | 0.098565025 | 0.176925377 | IGF1R       |
| ENSG00000132024 | 835.2311791 | 607.200815  | 0.45993601   | 0.098588497 | 0.176955285 | CC2D1A      |
| ENSG00000276386 | 15.80416275 | 55.17035949 | -1.805338345 | 0.098603296 | 0.176969622 | CNTNAP3P2   |
| ENSG00000237004 | 23.98120015 | 41.17029235 | -0.779028794 | 0.098632513 | 0.177009832 | ZNRF2P1     |
| ENSG00000204792 | 30.47583487 | 4.849778236 | 2.657495247  | 0.09866448  | 0.17705497  | LINC01291   |
| ENSG00000251497 | 0           | 2.496928964 | -3.902462001 | 0.098677276 | 1           | PITPNM2-AS1 |
| ENSG00000271428 | 0           | 2.496928964 | -3.902462001 | 0.098677276 | 1           | AL031281.1  |
| ENSG00000111785 | 416.2980141 | 325.0659034 | 0.356510892  | 0.098710426 | 0.177125186 | RIC8B       |
| ENSG00000166341 | 360.1181141 | 163.5361906 | 1.13951361   | 0.098721648 | 0.17713309  | DCHS1       |

|                 |             |             |              |             |             |            |
|-----------------|-------------|-------------|--------------|-------------|-------------|------------|
| novel.648       | 2.458071688 | 11.74790168 | -2.25959911  | 0.098732661 | 0.177140617 | -          |
| ENSG00000169738 | 595.193147  | 830.5705113 | -0.48104003  | 0.098749978 | 0.177145147 | DCXR       |
| ENSG00000221886 | 183.7770443 | 123.8487596 | 0.569121288  | 0.098751667 | 0.177145147 | ZBED8      |
| ENSG00000274414 | 2.72484337  | 10.02083758 | -1.885852105 | 0.098755641 | 0.177145147 | AL121772.1 |
| ENSG00000226360 | 57.22059931 | 92.94938102 | -0.701275728 | 0.098792066 | 0.177198252 | RPL10AP6   |
| ENSG00000197150 | 702.0956769 | 954.6891459 | -0.443460966 | 0.09883134  | 0.177256458 | ABC8B      |
| ENSG00000279513 | 3.326440121 | 0.336469917 | 3.106191632  | 0.098892139 | 0.177344267 | AL157902.2 |
| ENSG00000054267 | 874.083053  | 647.9901537 | 0.432074126  | 0.098893951 | 0.177344267 | ARID4B     |
| ENSG00000171864 | 3.375546236 | 0           | 4.087399299  | 0.098973134 | 0.177474015 | PRND       |
| ENSG00000113594 | 654.8350631 | 398.1340801 | 0.717271081  | 0.099029397 | 0.177553672 | LIFR       |
| ENSG00000273154 | 11.54122953 | 4.371668772 | 1.408539316  | 0.099031225 | 0.177553672 | AL121845.3 |
| ENSG00000197915 | 24.95544525 | 10.33235811 | 1.280464228  | 0.099078629 | 0.177626406 | HRNR       |
| ENSG00000244021 | 0.308355904 | 3.251301057 | -3.318665321 | 0.099110259 | 0.17767085  | AC093591.1 |
| ENSG00000126934 | 2990.906834 | 3813.448878 | -0.350439468 | 0.099168511 | 0.17776301  | MAP2K2     |
| ENSG00000166797 | 491.0328145 | 676.9554291 | -0.463557665 | 0.099178557 | 0.177768755 | CIAO2A     |
| ENSG00000178440 | 57.17189264 | 29.80729952 | 0.940876805  | 0.099229097 | 0.177847072 | LINC00843  |
| ENSG00000286154 | 4.474187994 | 0           | 4.496312767  | 0.099267034 | 0.177883875 | AC009974.2 |
| ENSG00000272984 | 2.72484337  | 0           | 3.779906979  | 0.099278142 | 0.177883875 | AC007349.4 |
| ENSG00000272746 | 2.72484337  | 0           | 3.779906979  | 0.099278142 | 0.177883875 | AP005131.7 |
| ENSG00000239877 | 2.72484337  | 0           | 3.779906979  | 0.099278142 | 0.177883875 | IGSF11-AS1 |
| ENSG00000116874 | 145.2427274 | 219.4561831 | -0.596609561 | 0.099283864 | 0.177883875 | WARS2      |
| ENSG00000133103 | 539.5371067 | 776.3582585 | -0.524732039 | 0.099370537 | 0.178026888 | COG6       |
| ENSG00000187147 | 1395.691183 | 1102.927139 | 0.339778725  | 0.099404195 | 0.178074909 | RNF220     |
| novel.1097      | 4.46791975  | 0           | 4.494387283  | 0.099461319 | 0.17815326  | -          |
| ENSG00000260868 | 5.812234624 | 18.52432628 | -1.671336669 | 0.099461646 | 0.17815326  | LINC01960  |
| novel.268       | 3.067190332 | 10.98522885 | -1.842509716 | 0.099473537 | 0.178159271 | -          |
| ENSG00000131375 | 722.5972766 | 585.128248  | 0.304661383  | 0.099478717 | 0.178159271 | CAPN7      |
| ENSG00000215859 | 11.83697768 | 4.320918095 | 1.455157218  | 0.099620111 | 0.178393945 | PDZK1P1    |
| ENSG00000180776 | 851.5179668 | 1137.976223 | -0.418431845 | 0.099628689 | 0.178393945 | ZDHHC20    |
| ENSG00000081913 | 311.9596631 | 205.5986887 | 0.602342699  | 0.099630351 | 0.178393945 | PHLPP1     |
| ENSG00000156521 | 327.627248  | 483.5521509 | -0.562293706 | 0.099695557 | 0.178487447 | TYSND1     |
| ENSG00000206262 | 4.551088195 | 0           | 4.51980099   | 0.099699102 | 0.178487447 | FOXL2NB    |
| ENSG00000242265 | 996.2873986 | 1751.847144 | -0.814388311 | 0.09970318  | 0.178487447 | PEG10      |
| ENSG00000106327 | 27.42605343 | 12.23089143 | 1.15516192   | 0.099710973 | 0.178489099 | TFR2       |
| ENSG00000259086 | 3.973382041 | 10.71140637 | -1.437266403 | 0.099800569 | 0.178637174 | AL136298.3 |
| ENSG00000244265 | 0.907445357 | 5.004470414 | -2.463516775 | 0.099823747 | 0.178666353 | SIAH2-AS1  |
| novel.611       | 2.712235611 | 0           | 3.773959522  | 0.099880472 | 0.178743253 | -          |
| ENSG00000273272 | 2.712235611 | 0           | 3.773959522  | 0.099880472 | 0.178743253 | U62317.4   |
| ENSG00000138835 | 644.3728574 | 1217.192645 | -0.917445978 | 0.09990079  | 0.178767299 | RGS3       |
| ENSG00000250238 | 2.710981963 | 0           | 3.77337074   | 0.099940553 | 0.178813821 | AC253576.1 |
| ENSG00000287322 | 2.710981963 | 0           | 3.77337074   | 0.099940553 | 0.178813821 | AC068189.2 |
| ENSG00000143337 | 1498.324437 | 1147.706684 | 0.384441447  | 0.100048353 | 0.178994371 | TOR1AIP1   |
| ENSG00000175416 | 1932.163563 | 1474.191753 | 0.390173544  | 0.100059823 | 0.179002565 | CLTB       |
| ENSG00000078053 | 96.53656875 | 59.54023042 | 0.695335255  | 0.100100925 | 0.179052169 | AMPH       |
| ENSG00000171595 | 5.090899802 | 0.356539013 | 3.720857468  | 0.100107424 | 0.179052169 | DNAI2      |
| ENSG00000257433 | 19.72453518 | 8.612310483 | 1.195260884  | 0.100108225 | 0.179052169 | AC004241.1 |
| ENSG00000174165 | 434.953168  | 595.7122236 | -0.453524626 | 0.100123602 | 0.179061772 | ZDHHC24    |
| ENSG00000250320 | 123.6793399 | 34.78622543 | 1.827880961  | 0.100132101 | 0.179061772 | AC113383.1 |
| ENSG00000009830 | 548.2768934 | 715.1309994 | -0.383173826 | 0.100134271 | 0.179061772 | POMT2      |
| ENSG00000168575 | 1292.078777 | 773.5355099 | 0.739896036  | 0.100323135 | 0.179387155 | SLC20A2    |
| ENSG00000128383 | 4.532140921 | 0.723690511 | 2.654788258  | 0.10035124  | 0.179425062 | APOBEC3A   |

|                 |             |             |              |             |             |            |
|-----------------|-------------|-------------|--------------|-------------|-------------|------------|
| ENSG00000057593 | 3.065936683 | 0           | 3.948456615  | 0.100361547 | 0.179431142 | F7         |
| ENSG00000137822 | 212.7308455 | 290.9887744 | -0.452262131 | 0.100382772 | 0.17945674  | TUBGCP4    |
| ENSG00000006606 | 20.33386729 | 3.9336975   | 2.368207694  | 0.100411579 | 0.179495888 | CCL26      |
| ENSG00000280143 | 113.0003514 | 35.12847472 | 1.682996845  | 0.100427803 | 0.179503926 | AP000892.3 |
| ENSG00000265749 | 30.33575368 | 14.64638814 | 1.040236054  | 0.100429893 | 0.179503926 | AC135178.3 |
| ENSG00000272144 | 22.71371421 | 9.367966845 | 1.265725758  | 0.100443246 | 0.179515442 | AC025171.4 |
| ENSG00000185917 | 456.7295788 | 322.0105073 | 0.504047877  | 0.100486537 | 0.179580459 | SETD4      |
| ENSG00000276102 | 0           | 2.862924587 | -4.099334776 | 0.100506317 | 0.179591102 | MIR6747    |
| ENSG00000238405 | 0           | 2.862924587 | -4.099334776 | 0.100506317 | 0.179591102 | RNA5SP311  |
| ENSG00000156411 | 966.9632842 | 1325.152769 | -0.45472004  | 0.100551941 | 0.17966027  | ATP5MPL    |
| ENSG00000140519 | 1.188078446 | 8.894433702 | -2.893279209 | 0.100605187 | 0.179743046 | RHCG       |
| ENSG00000138617 | 160.7796912 | 115.1748292 | 0.482261868  | 0.100666322 | 0.179839904 | PARP16     |
| ENSG00000122068 | 1696.418457 | 1287.255631 | 0.398003733  | 0.100687663 | 0.17986566  | FYTTD1     |
| ENSG00000108654 | 15980.32416 | 12303.15564 | 0.377250313  | 0.100704101 | 0.179880946 | DDX5       |
| ENSG00000113318 | 265.064021  | 364.1822811 | -0.458058945 | 0.100710067 | 0.179880946 | MSH3       |
| ENSG00000237133 | 7.262070157 | 1.487519214 | 2.308999384  | 0.100759449 | 0.179956778 | AC020594.1 |
| ENSG00000138083 | 5.240796714 | 0           | 4.722621289  | 0.100818611 | 0.180050065 | SIX3       |
| ENSG00000238278 | 61.94838176 | 96.15116849 | -0.633007576 | 0.10085162  | 0.180087214 | ALG1L6P    |
| novel.222       | 1.522903516 | 6.003267678 | -1.987864787 | 0.100853276 | 0.180087214 | -          |
| ENSG00000100053 | 3.052075276 | 0           | 3.942486765  | 0.10096253  | 0.180269912 | CRYBB3     |
| ENSG00000286923 | 5.72906618  | 1.436768536 | 1.997054311  | 0.100974273 | 0.18027849  | AC004522.4 |
| ENSG00000204138 | 1076.082262 | 731.9429834 | 0.555903849  | 0.101032023 | 0.18036301  | PHACTR4    |
| ENSG00000237651 | 47.53555998 | 29.49449471 | 0.684671074  | 0.101035497 | 0.18036301  | C2orf74    |
| novel.867       | 10.97244146 | 2.659793482 | 2.069757748  | 0.101051848 | 0.180379804 | -          |
| ENSG00000225655 | 10.34186825 | 2.731897526 | 1.894350762  | 0.101136273 | 0.180518103 | BX255923.1 |
| novel.1080      | 8.868070847 | 23.04734799 | -1.380312625 | 0.101177754 | 0.18056714  | -          |
| ENSG00000234494 | 54.68702361 | 30.37886639 | 0.843445544  | 0.101181945 | 0.18056714  | SP2-AS1    |
| ENSG00000118579 | 796.0073504 | 1048.440812 | -0.39736732  | 0.101184596 | 0.18056714  | MED28      |
| ENSG00000131697 | 388.5134588 | 540.3947832 | -0.475462872 | 0.10125121  | 0.180673606 | NPHP4      |
| ENSG00000163029 | 599.825454  | 817.0283895 | -0.446088578 | 0.101260668 | 0.180678073 | SMC6       |
| ENSG00000173917 | 234.0679177 | 538.7282776 | -1.202799799 | 0.101335151 | 0.180798556 | HOXB2      |
| ENSG00000091317 | 2486.651329 | 1724.776435 | 0.527630257  | 0.101344847 | 0.180803438 | CMTM6      |
| ENSG00000239959 | 5.074531097 | 0.743759607 | 2.799991898  | 0.101367178 | 0.180830861 | ENPP7P2    |
| ENSG00000176641 | 76.66260702 | 120.5404149 | -0.651156266 | 0.101411534 | 0.180895238 | RNF152     |
| ENSG00000132792 | 720.5515988 | 918.9138713 | -0.350762961 | 0.101421243 | 0.180895238 | CTNBL1     |
| ENSG00000169891 | 122.8164836 | 57.96138997 | 1.084783424  | 0.101424153 | 0.180895238 | REPS2      |
| ENSG00000267419 | 26.64167981 | 14.22720169 | 0.900904412  | 0.10147856  | 0.180979851 | AC011477.1 |
| ENSG00000188060 | 32.56355205 | 59.48074664 | -0.867114002 | 0.101571469 | 0.181133113 | RAB42      |
| ENSG00000141380 | 1745.250793 | 2121.548382 | -0.281772971 | 0.101588716 | 0.181151436 | AC091021.1 |
| ENSG00000237813 | 1.232169966 | 5.83911889  | -2.251581253 | 0.101628188 | 0.181209385 | AC002066.1 |
| ENSG00000166454 | 879.4866398 | 689.9141547 | 0.349901223  | 0.101662553 | 0.181258221 | ATMIN      |
| ENSG00000128805 | 890.0908896 | 1543.674593 | -0.794228752 | 0.101754544 | 0.181409785 | ARHGAP22   |
| ENSG00000095321 | 711.548745  | 1020.283627 | -0.519731059 | 0.101790575 | 0.181461571 | CRAT       |
| ENSG00000255248 | 2543.714709 | 2088.630556 | 0.284378016  | 0.10184284  | 0.181542287 | MIR100HG   |
| ENSG00000175772 | 12.24870295 | 30.38361828 | -1.316294515 | 0.101886853 | 0.181585696 | LINC01106  |
| novel.364       | 178.3552378 | 111.6448725 | 0.676650708  | 0.101887417 | 0.181585696 | -          |
| ENSG00000091542 | 1470.875534 | 2029.785271 | -0.46452572  | 0.10188816  | 0.181585696 | ALKBH5     |
| ENSG00000072182 | 5.177829192 | 1.080229524 | 2.262124276  | 0.101907115 | 0.18160702  | ASIC4      |
| ENSG00000260751 | 12.12144298 | 23.03305827 | -0.925551033 | 0.101980111 | 0.18172464  | AC008870.2 |
| ENSG00000286859 | 12.39831513 | 4.12852787  | 1.565646781  | 0.102043109 | 0.18182443  | AL158214.2 |
| ENSG00000181523 | 612.631448  | 791.5810594 | -0.369333396 | 0.102112939 | 0.181936379 | SGSH       |

|                 |             |             |              |             |             |            |
|-----------------|-------------|-------------|--------------|-------------|-------------|------------|
| ENSG00000172840 | 226.9105584 | 311.303279  | -0.455725466 | 0.102222374 | 0.182118872 | PDP2       |
| ENSG00000225916 | 0           | 4.198063374 | -4.646290587 | 0.102305578 | 0.18222962  | AC007879.2 |
| ENSG00000226012 | 0           | 4.198063374 | -4.646290587 | 0.102305578 | 0.18222962  | AP001434.1 |
| novel.371       | 0           | 4.198063374 | -4.646290587 | 0.102305578 | 0.18222962  | -          |
| ENSG00000231628 | 27.51610302 | 9.701868223 | 1.514652457  | 0.102373615 | 0.182338308 | AL133406.2 |
| ENSG00000267493 | 17.99761405 | 33.53786591 | -0.893930717 | 0.102385656 | 0.182347254 | CIRBP-AS1  |
| ENSG00000140104 | 191.1262726 | 282.9360532 | -0.565204186 | 0.102405458 | 0.182370018 | CLBA1      |
| ENSG00000213621 | 2.142122621 | 7.530925084 | -1.820356476 | 0.102465828 | 0.182465023 | RPSAP54    |
| ENSG00000129932 | 433.4876052 | 598.1008229 | -0.464926537 | 0.102481779 | 0.18248092  | DOHH       |
| ENSG00000170540 | 1966.817653 | 2975.435062 | -0.597354144 | 0.102492973 | 0.182488346 | ARL6IP1    |
| ENSG00000276603 | 2.124500267 | 7.042203135 | -1.736864282 | 0.102501047 | 0.182490215 | AL109614.1 |
| ENSG00000177169 | 816.3342955 | 1175.53306  | -0.525824931 | 0.102597652 | 0.182649691 | ULK1       |
| ENSG00000137575 | 2241.030329 | 3345.071067 | -0.577920153 | 0.102649432 | 0.182728184 | SDCBP      |
| ENSG00000224971 | 11.20138987 | 21.80759318 | -0.957232011 | 0.102655809 | 0.182728184 | SUMO2P3    |
| ENSG00000268894 | 9.118473823 | 36.23245057 | -1.992614161 | 0.102678652 | 0.182747827 | PLCE1-AS1  |
| ENSG00000226530 | 13.18763207 | 3.832196145 | 1.768398002  | 0.102680912 | 0.182747827 | AL158055.1 |
| ENSG00000166262 | 102.7290883 | 59.79599159 | 0.784462179  | 0.102707849 | 0.182783247 | FAM227B    |
| ENSG00000170581 | 2891.016434 | 3642.648122 | -0.333344016 | 0.102735575 | 0.182808147 | STAT2      |
| ENSG00000249978 | 11.24422774 | 3.873490212 | 1.526530389  | 0.102735913 | 0.182808147 | TRGV7      |
| ENSG00000270614 | 7.777991167 | 1.069617038 | 2.858732889  | 0.10274792  | 0.182816992 | AC011451.2 |
| ENSG00000159214 | 133.0295257 | 84.57075483 | 0.653463607  | 0.102786647 | 0.182873374 | CCDC24     |
| ENSG00000223754 | 8.503984579 | 0           | 5.422527366  | 0.102798119 | 0.18288126  | AC008073.1 |
| ENSG00000207870 | 14.17885878 | 43.11816368 | -1.600855833 | 0.102818027 | 0.182904153 | MIR221     |
| ENSG00000082805 | 916.5701085 | 1184.099302 | -0.369578028 | 0.102834202 | 0.182920403 | ERC1       |
| ENSG00000241015 | 143.349584  | 84.16714237 | 0.768394928  | 0.102859594 | 0.182953045 | TPM3P9     |
| ENSG00000110871 | 478.2253537 | 671.5999763 | -0.490017383 | 0.102872917 | 0.182964215 | COQ5       |
| ENSG00000138138 | 1070.736894 | 795.3524657 | 0.428567445  | 0.102904494 | 0.183006647 | ATAD1      |
| ENSG00000228696 | 13.8166669  | 4.503851709 | 1.63754234   | 0.102910862 | 0.183006647 | ARL17B     |
| ENSG00000272447 | 84.10781005 | 53.94206907 | 0.637516103  | 0.103009495 | 0.183169509 | AL135925.1 |
| ENSG00000136052 | 139.6395962 | 86.04620171 | 0.700279012  | 0.103189634 | 0.183477271 | SLC41A2    |
| ENSG00000135899 | 573.8236052 | 397.6490829 | 0.528354171  | 0.103212127 | 0.183504706 | SP110      |
| ENSG00000170293 | 29.38826249 | 88.08646861 | -1.585522103 | 0.103231789 | 0.183527105 | CMTM8      |
| ENSG00000266124 | 1.81990531  | 8.700887602 | -2.25686189  | 0.103277439 | 0.183595698 | MIR5587    |
| ENSG00000066248 | 16.47094958 | 5.219369879 | 1.648143076  | 0.103285005 | 0.183596586 | NGEF       |
| ENSG00000243433 | 0.909952655 | 4.657388011 | -2.357597547 | 0.103400336 | 0.183789021 | AC010973.1 |
| ENSG00000274340 | 3.617173671 | 0.387220594 | 3.227614437  | 0.103415049 | 0.183802599 | AC032011.1 |
| ENSG00000124299 | 1711.125546 | 1354.36103  | 0.337274239  | 0.103434822 | 0.183825167 | PEPD       |
| ENSG00000113389 | 218.3079893 | 654.8362585 | -1.585034714 | 0.103459795 | 0.183856972 | NPR3       |
| ENSG00000121101 | 11.30816418 | 2.598430319 | 2.137956982  | 0.103468165 | 0.18385927  | TEX14      |
| ENSG00000253570 | 838.0683798 | 646.3741895 | 0.375159968  | 0.103558683 | 0.184007532 | RNF5P1     |
| ENSG00000130584 | 325.0659762 | 137.1269813 | 1.244142556  | 0.103576971 | 0.184027442 | ZBTB46     |
| ENSG00000124116 | 4.564878331 | 16.52801602 | -1.855252061 | 0.103676425 | 0.184191547 | WFDC3      |
| ENSG00000143222 | 1145.969965 | 867.437069  | 0.401599994  | 0.103686174 | 0.184196272 | UFC1       |
| ENSG00000163827 | 18.42208927 | 6.124838129 | 1.588491885  | 0.103702744 | 0.184213113 | LRRC2      |
| ENSG00000229222 | 6.991466258 | 1.783850939 | 1.966236968  | 0.103776265 | 0.184323143 | KRT18P4    |
| ENSG00000206538 | 5868.833283 | 3167.116136 | 0.889861317  | 0.103778875 | 0.184323143 | VGLL3      |
| ENSG00000109736 | 1382.296175 | 1887.731449 | -0.449488597 | 0.103828549 | 0.184377132 | MFS10      |
| ENSG00000139624 | 758.9329847 | 954.685071  | -0.330829926 | 0.103832739 | 0.184377132 | CERS5      |
| ENSG00000285905 | 3.254625787 | 0           | 4.038789738  | 0.103837658 | 0.184377132 | AL033527.6 |
| ENSG00000255548 | 3.254625787 | 0           | 4.038789738  | 0.103837658 | 0.184377132 | AP003043.1 |
| ENSG00000100473 | 21.44790919 | 56.3908159  | -1.397271549 | 0.103861199 | 0.184406329 | COCH       |

|                 |             |             |              |             |             |            |
|-----------------|-------------|-------------|--------------|-------------|-------------|------------|
| ENSG00000203965 | 167.5577232 | 120.5740974 | 0.472998325  | 0.103924156 | 0.184505501 | EFCAB7     |
| ENSG00000203684 | 8.080007555 | 1.702418679 | 2.218510546  | 0.104021898 | 0.184666411 | IBA57-DT   |
| ENSG00000171180 | 4.719576376 | 0           | 4.573874909  | 0.104079006 | 0.184742548 | OR2M4      |
| novel.947       | 4.719576376 | 0           | 4.573874909  | 0.104079006 | 0.184742548 | -          |
| ENSG00000114656 | 18.65716372 | 35.37974078 | -0.922435717 | 0.104099946 | 0.184767093 | KIAA1257   |
| ENSG00000253865 | 3.576843098 | 0.356539013 | 3.213542799  | 0.104109957 | 0.184772238 | AC131025.1 |
| ENSG00000139746 | 1424.45409  | 1100.13479  | 0.372549704  | 0.104142928 | 0.184789824 | RBM26      |
| ENSG00000174628 | 82.014651   | 55.39877831 | 0.564100605  | 0.104144119 | 0.184789824 | IQCK       |
| ENSG00000189042 | 133.2440001 | 91.16000749 | 0.54510758   | 0.104154746 | 0.184789824 | ZNF567     |
| ENSG00000274918 | 6.927245087 | 1.365948763 | 2.311625775  | 0.104154881 | 0.184789824 | AC116447.1 |
| ENSG00000140297 | 1.230916317 | 6.358522421 | -2.37027129  | 0.104159252 | 0.184789824 | GCNT3      |
| ENSG00000252061 | 11.41654814 | 3.403553089 | 1.772150319  | 0.104177155 | 0.184789824 | RNU6-415P  |
| ENSG00000248975 | 0           | 4.077777192 | -4.613226026 | 0.104177434 | 0.184789824 | AL133372.2 |
| ENSG00000215456 | 0           | 4.077777192 | -4.613226026 | 0.104177434 | 0.184789824 | BCRP4      |
| ENSG00000234281 | 13.53728746 | 4.972632957 | 1.440640635  | 0.104183878 | 0.184789824 | LANCL1-AS1 |
| ENSG00000196634 | 0           | 2.567748738 | -3.937873429 | 0.10427351  | 1           | LUADT1     |
| ENSG00000242948 | 0           | 2.567748738 | -3.937873429 | 0.10427351  | 1           | EPS15P1    |
| ENSG00000286791 | 0           | 2.567748738 | -3.937873429 | 0.10427351  | 1           | AC079949.6 |
| ENSG00000259113 | 5.055655094 | 0.723690511 | 2.814378393  | 0.10427669  | 0.184941817 | AL118556.1 |
| ENSG00000278924 | 2.976499995 | 0           | 3.909578555  | 0.10433844  | 0.185026074 | AC078883.3 |
| ENSG00000223727 | 2.976499995 | 0           | 3.909578555  | 0.10433844  | 0.185026074 | AC034195.1 |
| ENSG00000223274 | 2.975246347 | 0           | 3.909029613  | 0.104395802 | 0.185079101 | RNA5SP498  |
| ENSG00000255250 | 2.975246347 | 0           | 3.909029613  | 0.104395802 | 0.185079101 | AP003059.2 |
| ENSG00000276868 | 2.975246347 | 0           | 3.909029613  | 0.104395802 | 0.185079101 | AL353626.2 |
| ENSG00000225335 | 3.313832363 | 9.029056784 | -1.440829665 | 0.104396837 | 0.185079101 | AC016027.1 |
| ENSG00000243449 | 792.8195108 | 590.6879066 | 0.424473503  | 0.104436804 | 0.185137323 | C4orf48    |
| ENSG00000255843 | 3.356670233 | 0.356539013 | 3.117281128  | 0.104456712 | 0.185147349 | AP000593.3 |
| ENSG00000176381 | 3.356670233 | 0.356539013 | 3.117281128  | 0.104456712 | 0.185147349 | PRR18      |
| ENSG00000247081 | 29.93957074 | 56.89691001 | -0.928262728 | 0.104494153 | 0.185197183 | BAALC-AS1  |
| ENSG00000156113 | 235.1856503 | 506.0877635 | -1.105462399 | 0.104500043 | 0.185197183 | KCNMA1     |
| ENSG00000134982 | 661.9654156 | 515.9410908 | 0.359457244  | 0.104507042 | 0.185197183 | APC        |
| ENSG00000124370 | 235.7020138 | 314.97839   | -0.417976115 | 0.10451334  | 0.185197183 | MCEE       |
| ENSG00000165650 | 730.4353571 | 561.4315781 | 0.3797443    | 0.10452295  | 0.18520158  | PDZD8      |
| ENSG00000233073 | 3.680141193 | 0.336469917 | 3.249461609  | 0.104540632 | 0.185220279 | AC005009.2 |
| ENSG00000242085 | 12.38570737 | 5.4318292   | 1.195675439  | 0.104664995 | 0.185427974 | RPS20P33   |
| ENSG00000138604 | 710.3389391 | 450.7813589 | 0.655840501  | 0.104799266 | 0.185653194 | GLCE       |
| ENSG00000197321 | 1034.483279 | 2220.699142 | -1.102077817 | 0.104834526 | 0.185702994 | SVIL       |
| ENSG00000252933 | 0.293240848 | 3.352802412 | -3.356865277 | 0.104842938 | 0.185705235 | RNU6-1223P |
| ENSG00000253921 | 10.51161008 | 2.812173909 | 1.892530515  | 0.104886115 | 0.185769047 | AC091982.1 |
| ENSG00000180336 | 21.59215077 | 8.376186046 | 1.372174466  | 0.104897659 | 0.185776828 | MEIOC      |
| ENSG00000272667 | 101.5789753 | 70.61763241 | 0.523038292  | 0.104964645 | 0.185882793 | AC012306.2 |
| ENSG00000144460 | 5.054401445 | 0.356539013 | 3.711107657  | 0.105053906 | 0.186024003 | NYAP2      |
| ENSG00000105717 | 61.15154293 | 26.54500079 | 1.210308882  | 0.105058704 | 0.186024003 | PBX4       |
| ENSG00000163964 | 389.0492092 | 556.9376282 | -0.518101339 | 0.10507367  | 0.186037823 | PIGX       |
| ENSG00000086848 | 146.4759806 | 219.608692  | -0.584861278 | 0.105109407 | 0.186080108 | ALG9       |
| ENSG00000160194 | 778.5217692 | 991.020962  | -0.348416879 | 0.105111877 | 0.186080108 | NDUFV3     |
| ENSG00000128271 | 3.368024343 | 11.52470148 | -1.773141299 | 0.105133559 | 0.186105811 | ADORA2A    |
| ENSG00000129151 | 4.308207111 | 0           | 4.439734073  | 0.105147275 | 0.186110812 | BBOX1      |
| ENSG00000242600 | 4.236392776 | 14.18719189 | -1.748886642 | 0.10515071  | 0.186110812 | MBL1P      |
| ENSG00000117222 | 322.9173169 | 406.6848053 | -0.332336865 | 0.105185771 | 0.186158971 | RBBP5      |
| ENSG00000219102 | 1.22840902  | 6.817847059 | -2.480124811 | 0.10519225  | 0.186158971 | HNRNPA3P12 |



|                 |             |             |              |             |             |            |
|-----------------|-------------|-------------|--------------|-------------|-------------|------------|
| ENSG00000148730 | 2229.280257 | 1656.082889 | 0.428654263  | 0.105240194 | 0.186229196 | EIF4EBP2   |
| ENSG00000232882 | 9.611757884 | 20.22802922 | -1.06862517  | 0.105246268 | 0.186229196 | PHKA1P1    |
| ENSG00000188342 | 534.1713717 | 759.8392455 | -0.508318359 | 0.105254714 | 0.186231458 | GTF2F2     |
| ENSG00000226363 | 3.978396636 | 17.594341   | -2.150423457 | 0.105308891 | 0.186314627 | HAGLROS    |
| ENSG00000264772 | 5.129976726 | 1.060160428 | 2.263647361  | 0.105341903 | 0.186360342 | AC016876.2 |
| ENSG00000214900 | 34.76334286 | 69.60522175 | -0.998851351 | 0.105363463 | 0.186385793 | LINC01588  |
| ENSG00000181392 | 12.04461406 | 4.666844622 | 1.369029033  | 0.105475062 | 0.186570506 | SYNE4      |
| ENSG00000262136 | 1.511549406 | 6.602947593 | -2.121223177 | 0.1055468   | 0.186684689 | AC092115.3 |
| ENSG00000100124 | 389.7530794 | 534.6704536 | -0.456455225 | 0.105612493 | 0.186788167 | ANKRD54    |
| ENSG00000197254 | 4.306953462 | 0           | 4.439337235  | 0.105658315 | 0.18681834  | AP000445.1 |
| ENSG00000143105 | 4.306953462 | 0           | 4.439337235  | 0.105658315 | 0.18681834  | KCNA10     |
| ENSG00000276412 | 4.306953462 | 0           | 4.439337235  | 0.105658315 | 0.18681834  | AL591926.2 |
| ENSG00000211695 | 4.306953462 | 0           | 4.439337235  | 0.105658315 | 0.18681834  | TRGV9      |
| ENSG00000164327 | 877.9941673 | 592.9427777 | 0.566813893  | 0.105734731 | 0.18694073  | RICTOR     |
| ENSG00000158691 | 169.6142413 | 123.5382194 | 0.458187985  | 0.105764    | 0.18696327  | ZSCAN12    |
| ENSG00000158161 | 304.0262615 | 391.8444859 | -0.365411424 | 0.105768845 | 0.18696327  | EYA3       |
| ENSG00000040531 | 633.2890282 | 508.1033162 | 0.31801751   | 0.105769067 | 0.18696327  | CTNS       |
| ENSG00000279858 | 3.325186472 | 0.336469917 | 3.105717264  | 0.105851229 | 0.187095773 | AC068880.4 |
| novel.651       | 22.87837017 | 9.904999327 | 1.216495913  | 0.105859357 | 0.187097412 | -          |
| ENSG00000261971 | 75.97519233 | 43.51137326 | 0.806863325  | 0.1059245   | 0.187199811 | MMP25-AS1  |
| ENSG00000269019 | 20.54888337 | 10.63943072 | 0.943689683  | 0.106000999 | 0.187322266 | HOMER3-AS1 |
| ENSG00000242951 | 2.73619748  | 10.28289171 | -1.913846894 | 0.106074284 | 0.187428037 | AC007182.2 |
| ENSG00000180304 | 1859.727704 | 2438.052876 | -0.390612432 | 0.10607528  | 0.187428037 | OAZ2       |
| ENSG00000287031 | 3.631035079 | 0.336469917 | 3.232430798  | 0.106118143 | 0.187491021 | AC093307.1 |
| ENSG00000094963 | 2209.746608 | 242.4599378 | 3.187924096  | 0.106172547 | 0.187574388 | FMO2       |
| ENSG00000224881 | 0           | 2.598430319 | -3.953034584 | 0.106196239 | 1           | AC068279.1 |
| ENSG00000234695 | 0           | 2.598430319 | -3.953034584 | 0.106196239 | 1           | AC002076.1 |
| ENSG00000157538 | 875.0555024 | 1184.271355 | -0.436337343 | 0.106230561 | 0.187660387 | VPS26C     |
| novel.742       | 224.3521949 | 148.6280992 | 0.593575839  | 0.106235671 | 0.187660387 | -          |
| ENSG00000142530 | 14.02200944 | 5.697479343 | 1.293863483  | 0.106249526 | 0.187667181 | AC020909.1 |
| ENSG00000213856 | 3.020591515 | 9.222602883 | -1.601438456 | 0.106253964 | 0.187667181 | VDAC1P2    |
| ENSG00000168152 | 84.45606925 | 59.86018008 | 0.496120057  | 0.106295778 | 0.187728273 | THAP9      |
| ENSG00000268707 | 7.41795058  | 1.069617038 | 2.791194304  | 0.106385186 | 0.187864709 | AL158151.4 |
| ENSG00000269427 | 44.60655645 | 27.13804942 | 0.715914136  | 0.106387493 | 0.187864709 | AC024075.3 |
| ENSG00000115145 | 831.2160967 | 669.0959365 | 0.313036159  | 0.106442713 | 0.187949444 | STAM2      |
| ENSG00000120805 | 1397.685913 | 1977.348281 | -0.50052098  | 0.106468553 | 0.187971248 | ARL1       |
| ENSG00000114544 | 638.4655325 | 784.0403866 | -0.296285128 | 0.106469531 | 0.187971248 | SLC41A3    |
| ENSG00000226085 | 16.33645246 | 41.63359819 | -1.352212658 | 0.106482344 | 0.187973801 | UQCRFS1P1  |
| ENSG00000268034 | 0           | 2.527610546 | -3.917693859 | 0.106483002 | 1           | AC243960.2 |
| ENSG00000176340 | 1205.697927 | 1664.546956 | -0.465338764 | 0.106485447 | 0.187973801 | COX8A      |
| ENSG00000176894 | 38.17392034 | 75.47622496 | -0.98433983  | 0.106601256 | 0.188165448 | PXMP2      |
| ENSG00000185219 | 761.0227548 | 580.0203497 | 0.391928186  | 0.106650133 | 0.188238934 | ZNF445     |
| ENSG00000264057 | 5.702597014 | 1.41669944  | 2.001339761  | 0.106693393 | 0.188302496 | AC103810.1 |
| ENSG00000251369 | 133.1532385 | 178.4372781 | -0.421098598 | 0.106825675 | 0.188522251 | ZNF550     |
| ENSG00000275560 | 19.03231937 | 8.061069495 | 1.229591489  | 0.10683242  | 0.188522251 | AC008115.3 |
| ENSG00000065325 | 0.615458159 | 3.893559308 | -2.678611572 | 0.106842243 | 0.188526781 | GLP2R      |
| ENSG00000104228 | 405.2768931 | 285.4275064 | 0.504812335  | 0.106872444 | 0.188567265 | TRIM35     |
| ENSG00000137819 | 15.63177108 | 34.59931061 | -1.149734545 | 0.106915109 | 0.18861623  | PAQR5      |
| ENSG00000259503 | 2.697120555 | 0           | 3.766734739  | 0.106943755 | 0.18861623  | AC048383.1 |
| ENSG00000275025 | 2.697120555 | 0           | 3.766734739  | 0.106943755 | 0.18861623  | AC002401.3 |
| ENSG00000270402 | 2.697120555 | 0           | 3.766734739  | 0.106943755 | 0.18861623  | AC011458.1 |

|                 |             |             |              |             |             |            |
|-----------------|-------------|-------------|--------------|-------------|-------------|------------|
| ENSG00000251892 | 2.697120555 | 0           | 3.766734739  | 0.106943755 | 0.18861623  | RNU7-84P   |
| ENSG00000244378 | 2.697120555 | 0           | 3.766734739  | 0.106943755 | 0.18861623  | RPS2P45    |
| ENSG00000258839 | 98.27370506 | 65.29791705 | 0.589049092  | 0.106984151 | 0.18867467  | MC1R       |
| ENSG00000181544 | 53.75630057 | 92.58145883 | -0.784737321 | 0.107042871 | 0.188755584 | FANCB      |
| ENSG00000173145 | 404.4218452 | 588.4068699 | -0.541467031 | 0.107044562 | 0.188755584 | NOC3L      |
| ENSG00000127311 | 147.3286923 | 109.0372424 | 0.433348764  | 0.10720084  | 0.189018325 | HELB       |
| ENSG00000280109 | 8.660221007 | 2.51699806  | 1.786513552  | 0.107223392 | 0.189045259 | PLAC4      |
| ENSG00000188124 | 0           | 2.578361223 | -3.943026472 | 0.107295366 | 1           | OR2AG2     |
| ENSG00000230131 | 4.443957882 | 0           | 4.486914655  | 0.1074241   | 0.189373425 | LINC02641  |
| ENSG00000279375 | 4.443957882 | 0           | 4.486914655  | 0.1074241   | 0.189373425 | AC244517.7 |
| ENSG00000272247 | 4.206162664 | 0.693008929 | 2.57200786   | 0.107466314 | 0.18942777  | AC080013.5 |
| ENSG00000158793 | 569.4357489 | 428.3480749 | 0.410161691  | 0.10746951  | 0.18942777  | NIT1       |
| ENSG00000204463 | 0.925067711 | 5.696323468 | -2.635067696 | 0.107775058 | 0.189953449 | BAG6       |
| ENSG00000273254 | 3.354162936 | 0.387220594 | 3.116412323  | 0.107979878 | 0.190288625 | AF129075.2 |
| ENSG00000185303 | 3.354162936 | 0.387220594 | 3.116412323  | 0.107979878 | 0.190288625 | SFTPA2     |
| ENSG00000280486 | 13.51583289 | 5.788368213 | 1.230060322  | 0.108060301 | 0.190417437 | AC005329.3 |
| ENSG00000262700 | 11.81781694 | 2.853467977 | 2.050192195  | 0.108077224 | 0.190422947 | AC133552.3 |
| ENSG00000064012 | 275.5039585 | 389.7197984 | -0.500459324 | 0.108078087 | 0.190422947 | CASP8      |
| ENSG00000224003 | 3.854968889 | 0.356539013 | 3.321850834  | 0.108115676 | 0.190473955 | YES1P1     |
| ENSG00000127452 | 427.5264854 | 573.6678637 | -0.423933503 | 0.1081217   | 0.190473955 | FBXL12     |
| ENSG00000136048 | 736.7298488 | 590.3257166 | 0.319279746  | 0.108144798 | 0.190501729 | DRAM1      |
| ENSG00000279656 | 45.66522364 | 25.94660514 | 0.821356226  | 0.108251139 | 0.190676124 | AL132780.4 |
| ENSG00000166246 | 22.03396361 | 11.81170499 | 0.899034431  | 0.108282407 | 0.190707106 | C16orf71   |
| novel.1020      | 9.8306771   | 31.77981626 | -1.688330344 | 0.108288821 | 0.190707106 | -          |
| ENSG00000141738 | 18.49494379 | 9.193205571 | 1.00008947   | 0.108295277 | 0.190707106 | GRB7       |
| ENSG00000228477 | 2.694613258 | 10.64760306 | -1.974596531 | 0.108298089 | 0.190707106 | AL663070.1 |
| ENSG00000227165 | 3.344062475 | 0.387220594 | 3.112675255  | 0.108324015 | 0.190739834 | WDR11-AS1  |
| ENSG00000144488 | 13.4720261  | 31.503986   | -1.231099316 | 0.108344635 | 0.190763213 | ESPNL      |
| ENSG00000255992 | 4.834228581 | 1.080229524 | 2.165343225  | 0.108421972 | 0.190886444 | AC131009.1 |
| ENSG00000134326 | 353.6807499 | 205.0487448 | 0.785571037  | 0.1084372   | 0.190900318 | CMPK2      |
| ENSG00000168959 | 4.226292315 | 0           | 4.413303839  | 0.108444652 | 0.190900502 | GRM5       |
| ENSG00000221890 | 196.5658154 | 108.6113306 | 0.857799827  | 0.10856306  | 0.191091525 | NPTXR      |
| ENSG00000230314 | 4.622831258 | 0           | 4.541477524  | 0.108567876 | 0.191091525 | ELOVL2-AS1 |
| ENSG00000105258 | 244.9411946 | 177.2295363 | 0.466992989  | 0.108594019 | 0.191124591 | POLR2I     |
| ENSG00000236867 | 0.293240848 | 3.250145181 | -3.318830932 | 0.108624596 | 0.191165456 | Z98885.1   |
| ENSG00000159556 | 0.925067711 | 5.920551149 | -2.683760573 | 0.108792737 | 0.191448394 | ISL2       |
| ENSG00000132471 | 2394.868028 | 1763.813711 | 0.441447944  | 0.108818948 | 0.191481549 | WBP2       |
| ENSG00000253210 | 64.96836037 | 40.15959833 | 0.698219396  | 0.10884414  | 0.191506755 | AC040970.1 |
| ENSG00000115020 | 1000.522794 | 759.8984587 | 0.396791447  | 0.108848014 | 0.191506755 | PIKFYVE    |
| ENSG00000182463 | 60.12710809 | 24.31269449 | 1.309058236  | 0.108857581 | 0.191510618 | TSHZ2      |
| ENSG00000184619 | 24.7765006  | 11.24856724 | 1.143098832  | 0.108873725 | 0.191523599 | KRBA2      |
| ENSG00000166482 | 1325.587364 | 595.6219802 | 1.153881039  | 0.108879702 | 0.191523599 | MFAP4      |
| ENSG00000227344 | 2.435363469 | 7.95828387  | -1.709374435 | 0.109001463 | 0.191720393 | HAUS6P1    |
| ENSG00000259687 | 9.88354416  | 3.220619475 | 1.618530511  | 0.109006337 | 0.191720393 | LINC01220  |
| ENSG00000164751 | 780.7514348 | 627.1299439 | 0.316097453  | 0.109056485 | 0.191791631 | PEX2       |
| ENSG00000221843 | 26.11572961 | 41.38403594 | -0.664520902 | 0.109061605 | 0.191791631 | C2orf16    |
| ENSG00000223546 | 22.24152871 | 40.22121828 | -0.852652855 | 0.109103733 | 0.191840691 | LINC00630  |
| ENSG00000244752 | 4.806505766 | 0.713078025 | 2.747985152  | 0.109104271 | 0.191840691 | CRYBB2     |
| ENSG00000259479 | 4.806505766 | 12.02544858 | -1.323564816 | 0.109112092 | 0.191841461 | SORD2P     |
| ENSG00000163510 | 530.7486725 | 426.8820718 | 0.314458166  | 0.109149654 | 0.191894515 | CWC22      |
| ENSG00000272994 | 64.7264482  | 43.55523587 | 0.569686238  | 0.109282899 | 0.192115772 | AC012360.3 |

|                 |             |             |              |             |             |            |
|-----------------|-------------|-------------|--------------|-------------|-------------|------------|
| ENSG00000183666 | 8.161922351 | 2.833398881 | 1.517671978  | 0.109290481 | 0.192116103 | GUSBP1     |
| ENSG00000255823 | 4.559863736 | 13.32746564 | -1.54306618  | 0.109324786 | 0.192152341 | MTRNR2L8   |
| ENSG00000279348 | 61.50470236 | 33.80377284 | 0.859229452  | 0.109325888 | 0.192152341 | AC012513.3 |
| ENSG00000128218 | 3.675126598 | 0.356539013 | 3.247812429  | 0.109356303 | 0.192192797 | VPREB3     |
| ENSG00000260163 | 0.586481695 | 4.33153058  | -2.859428897 | 0.10939837  | 0.192253723 | AC012508.1 |
| novel.67        | 4.582571956 | 0.693008929 | 2.69418127   | 0.109479186 | 0.192382734 | -          |
| ENSG00000272707 | 5.804641461 | 1.436768536 | 2.012343688  | 0.109554619 | 0.192500147 | AC046143.2 |
| ENSG00000112137 | 162.587174  | 73.33437549 | 1.151023501  | 0.10956082  | 0.192500147 | PHACTR1    |
| ENSG00000239636 | 19.47162491 | 8.000733813 | 1.287789772  | 0.109573636 | 0.192509646 | AC004865.2 |
| ENSG00000214199 | 0           | 2.537067156 | -3.922775266 | 0.109588349 | 1           | EEF1A1P12  |
| ENSG00000183576 | 1613.342477 | 1287.936731 | 0.325158174  | 0.109609536 | 0.192559697 | SETD3      |
| ENSG00000175183 | 285.0090854 | 409.4523463 | -0.522399089 | 0.109631078 | 0.192584518 | CSRP2      |
| ENSG00000128346 | 99.86806691 | 64.84560888 | 0.62463983   | 0.109643189 | 0.192592773 | C22orf23   |
| ENSG00000285830 | 4.80274482  | 0.387220594 | 3.636622672  | 0.10968856  | 0.192659443 | AL109628.2 |
| ENSG00000158296 | 289.7899324 | 154.4368748 | 0.908425753  | 0.109710402 | 0.19268478  | SLC13A3    |
| ENSG00000111199 | 78.10437902 | 123.9448328 | -0.668358631 | 0.109737345 | 0.192709439 | TRPV4      |
| ENSG00000224738 | 18.97304152 | 8.733880934 | 1.126866622  | 0.109739277 | 0.192709439 | AC099850.1 |
| novel.117       | 4.18854031  | 0           | 4.400976029  | 0.109787211 | 0.192780585 | -          |
| ENSG00000176903 | 1838.903645 | 1449.283138 | 0.343349448  | 0.109811276 | 0.19280981  | PNMA1      |
| novel.72        | 7.30232946  | 1.702418679 | 2.066996315  | 0.109859017 | 0.192880599 | -          |
| ENSG00000163364 | 22.60672609 | 78.73518478 | -1.800777016 | 0.109876701 | 0.192895021 | LINC01116  |
| ENSG00000272255 | 5.22449928  | 0.336469917 | 3.756034443  | 0.10988208  | 0.192895021 | AC113361.1 |
| ENSG00000145721 | 3.644896486 | 0.387220594 | 3.237275705  | 0.109897061 | 0.192908287 | LIX1       |
| ENSG00000112851 | 2302.630876 | 1803.759487 | 0.352133449  | 0.109906646 | 0.192912078 | ERBIN      |
| ENSG00000213066 | 273.1079727 | 378.6277686 | -0.470654655 | 0.109940073 | 0.192957715 | FGFR1OP    |
| ENSG00000235204 | 27.69218437 | 11.30162967 | 1.299065655  | 0.109962403 | 0.192983869 | AL162724.2 |
| ENSG00000124253 | 4.57881101  | 0           | 4.528221667  | 0.109970985 | 0.192985893 | PCK1       |
| ENSG00000251703 | 0           | 2.466247382 | -3.886947261 | 0.109977962 | 1           | RNU6-998P  |
| ENSG00000206775 | 0           | 2.466247382 | -3.886947261 | 0.109977962 | 1           | SNORD37    |
| ENSG00000168124 | 0           | 2.466247382 | -3.886947261 | 0.109977962 | 1           | OR1F1      |
| ENSG00000226562 | 0.923814062 | 4.697526203 | -2.356791737 | 0.110001505 | 0.193026415 | CYP4F26P   |
| ENSG00000163162 | 878.3845802 | 1124.675613 | -0.35652488  | 0.110011974 | 0.193027595 | RNF149     |
| ENSG00000260038 | 9.263071407 | 2.934900236 | 1.67380627   | 0.110022146 | 0.193027595 | AC009090.1 |
| ENSG00000260060 | 8.72193488  | 2.91483114  | 1.592849047  | 0.110024466 | 0.193027595 | AC009088.1 |
| ENSG00000175203 | 2158.037597 | 2671.937025 | -0.308140984 | 0.110092638 | 0.193134154 | DCTN2      |
| ENSG00000224903 | 10.8615502  | 4.33153058  | 1.331119338  | 0.110163184 | 0.193244864 | AC005534.1 |
| ENSG00000125046 | 13.67708391 | 2.852312101 | 2.258170845  | 0.11018105  | 0.193263156 | SSUH2      |
| ENSG00000188997 | 328.5371724 | 258.5057223 | 0.345670565  | 0.110222179 | 0.193322247 | KCTD21     |
| ENSG00000230185 | 2.739958426 | 7.988965452 | -1.543358884 | 0.110231433 | 0.193325426 | C9orf147   |
| ENSG00000198952 | 1549.143888 | 1923.365632 | -0.312144401 | 0.110284166 | 0.193399679 | SMG5       |
| ENSG00000236824 | 0.909952655 | 7.030434774 | -2.953188382 | 0.110288659 | 0.193399679 | BCYRN1     |
| ENSG00000227492 | 9.937736141 | 2.793260689 | 1.818117074  | 0.11037232  | 0.193533323 | AL138921.1 |
| ENSG00000141905 | 2192.963689 | 2892.31401  | -0.399249462 | 0.110395136 | 0.193560267 | NFIC       |
| ENSG00000124126 | 2874.223181 | 1622.426961 | 0.825169853  | 0.11040719  | 0.193568338 | PREX1      |
| ENSG00000164307 | 1037.27271  | 1378.943809 | -0.410762903 | 0.110433443 | 0.193601301 | ERAP1      |
| ENSG00000179165 | 3.298717306 | 0.356539013 | 3.095873386  | 0.110447652 | 0.193613146 | PXT1       |
| ENSG00000010318 | 102.1600864 | 69.43102124 | 0.558469867  | 0.1104618   | 0.193624883 | PHF7       |
| ENSG00000226976 | 51.59580014 | 78.03618686 | -0.597015271 | 0.110479485 | 0.193642818 | COX6A1P2   |
| ENSG00000272636 | 4.932440811 | 0           | 4.635103449  | 0.110497346 | 0.193647996 | DOC2B      |
| ENSG00000211795 | 4.932440811 | 0           | 4.635103449  | 0.110497346 | 0.193647996 | TRAV8-6    |
| ENSG00000174744 | 687.1880317 | 907.5518844 | -0.401501358 | 0.11060843  | 0.193829598 | BRMS1      |

|                 |             |             |              |             |             |            |
|-----------------|-------------|-------------|--------------|-------------|-------------|------------|
| ENSG00000143367 | 44.5127459  | 88.08847639 | -0.987218814 | 0.110621486 | 0.193839403 | TUFT1      |
| ENSG00000275476 | 14.18136608 | 1.426156051 | 3.311708854  | 0.110637458 | 0.193854315 | AC009318.4 |
| novel.800       | 11.94160069 | 26.4946353  | -1.153286921 | 0.110657652 | 0.193876625 | -          |
| ENSG00000166747 | 1280.226622 | 1661.537133 | -0.37611659  | 0.110743676 | 0.194014259 | AP1G1      |
| ENSG00000134824 | 4474.12409  | 2325.886406 | 0.943743804  | 0.110776382 | 0.194058471 | FADS2      |
| ENSG00000273024 | 17.15438986 | 7.418811243 | 1.203037924  | 0.110935605 | 0.194324296 | INTS4P2    |
| ENSG00000177822 | 16.94564238 | 34.47902443 | -1.027835715 | 0.110953732 | 0.194342946 | TENM3-AS1  |
| ENSG00000179044 | 47.68914657 | 26.10831379 | 0.8751767    | 0.111005712 | 0.194420884 | EXOC3L1    |
| ENSG00000127527 | 588.202594  | 737.7100797 | -0.326700546 | 0.111027337 | 0.194445651 | EPS15L1    |
| ENSG00000125505 | 88.7438898  | 166.4093082 | -0.907341631 | 0.111053923 | 0.194479104 | MBOAT7     |
| ENSG00000261609 | 28.83555839 | 51.07208084 | -0.826187846 | 0.111110065 | 0.194564306 | GAN        |
| ENSG00000100577 | 237.9641314 | 318.7879613 | -0.422563085 | 0.111138764 | 0.194601445 | GSTZ1      |
| ENSG00000162601 | 1298.718893 | 821.5939983 | 0.660769798  | 0.111192411 | 0.194682258 | MYSM1      |
| ENSG00000210174 | 38.68231946 | 71.07580117 | -0.877248564 | 0.11127611  | 0.194815674 | MT-TR      |
| ENSG00000112837 | 1076.364804 | 398.4527587 | 1.433505385  | 0.111462289 | 0.195128478 | TBX18      |
| ENSG00000186825 | 2.755073482 | 0           | 3.794240047  | 0.111527656 | 0.195220713 | C2orf27B   |
| ENSG00000271966 | 11.44427095 | 4.637318915 | 1.301239198  | 0.111530004 | 0.195220713 | AC021321.1 |
| ENSG00000151005 | 7.699837317 | 0.672939833 | 3.482387915  | 0.111576992 | 0.195289803 | TKTL2      |
| ENSG00000213244 | 0.61420451  | 6.632473299 | -3.438028765 | 0.111595634 | 0.195309274 | HIST2H3DP1 |
| ENSG00000259182 | 4.252761481 | 0.743759607 | 2.544942263  | 0.111613082 | 0.195326652 | AC019254.1 |
| ENSG00000183808 | 251.9093398 | 357.3932702 | -0.504593437 | 0.111783237 | 0.195611253 | RBM12B     |
| ENSG00000260267 | 65.6326399  | 92.29317105 | -0.493297681 | 0.111818349 | 0.195659517 | AC026471.1 |
| ENSG00000259436 | 23.78860756 | 8.45646243  | 1.497760067  | 0.111828881 | 0.195664769 | AC010247.2 |
| ENSG00000280333 | 0.586481695 | 4.800183434 | -3.006197248 | 0.11192338  | 0.195816925 | AC090617.9 |
| ENSG00000226084 | 264.9180268 | 402.8286192 | -0.604835623 | 0.111948777 | 0.195848171 | AC113935.1 |
| ENSG00000135541 | 561.1344028 | 403.5861415 | 0.475603433  | 0.11198508  | 0.195898489 | AHI1       |
| ENSG00000104687 | 573.2627381 | 829.2250974 | -0.532984242 | 0.112104957 | 0.196094991 | GSR        |
| ENSG00000281920 | 5.759296292 | 1.386017859 | 2.027794874  | 0.112119041 | 0.196106423 | AC007389.5 |
| ENSG00000142494 | 26.10946137 | 48.41177378 | -0.888221796 | 0.112189147 | 0.196215836 | SLC47A1    |
| ENSG00000114423 | 372.4475658 | 528.8585827 | -0.50632716  | 0.11221859  | 0.196254118 | CBLB       |
| ENSG00000219481 | 228.5671327 | 172.4177941 | 0.406700195  | 0.112243993 | 0.196285332 | NBPF1      |
| ENSG00000085415 | 507.967119  | 724.0778657 | -0.511709233 | 0.112290018 | 0.196352602 | SEH1L      |
| ENSG00000227676 | 0.307102255 | 3.149799701 | -3.280052791 | 0.112306211 | 0.1963677   | LINC01068  |
| ENSG00000110400 | 162.1094326 | 102.3356188 | 0.661254551  | 0.112320742 | 0.196379892 | NECTIN1    |
| ENSG00000244009 | 1.215801261 | 4.94310725  | -2.032052029 | 0.112415214 | 0.196531841 | B3GAT3P1   |
| ENSG00000273073 | 4.819113525 | 0.672939833 | 2.791178574  | 0.112428837 | 0.196542432 | AC073869.3 |
| ENSG00000102359 | 1345.012636 | 2372.90338  | -0.819053896 | 0.112469891 | 0.196600972 | SRPX2      |
| ENSG00000152954 | 8.017253496 | 0           | 5.336386608  | 0.112480342 | 0.196606013 | NRSN1      |
| ENSG00000261270 | 35.1837724  | 19.391069   | 0.859142674  | 0.112488698 | 0.196607391 | AC012181.2 |
| novel.918       | 561.4900474 | 96.95773828 | 2.534122074  | 0.112507567 | 0.196627142 | -          |
| ENSG00000115652 | 1355.15672  | 1734.943101 | -0.356284559 | 0.112517735 | 0.196631686 | UXS1       |
| ENSG00000227189 | 0           | 2.486316478 | -3.897186899 | 0.112528605 | 1           | AC092535.1 |
| ENSG00000253508 | 0           | 2.486316478 | -3.897186899 | 0.112528605 | 1           | AC004080.2 |
| ENSG00000267575 | 89.00318303 | 129.065561  | -0.534893774 | 0.112601367 | 0.196764603 | AC006504.5 |
| ENSG00000184659 | 10.23606285 | 2.629111901 | 1.983045694  | 0.112621986 | 0.196787397 | FOXD4L4    |
| ENSG00000172717 | 4.775022005 | 0.356539013 | 3.628811718  | 0.112689896 | 0.196892817 | FAM71D     |
| ENSG00000253768 | 0           | 3.749479616 | -4.484182065 | 0.112724399 | 0.196939856 | AC008663.1 |
| ENSG00000266922 | 3.575589449 | 0.356539013 | 3.21290582   | 0.112768334 | 0.197003367 | AC008543.3 |
| ENSG00000204237 | 417.6128815 | 532.1689355 | -0.349992043 | 0.112820631 | 0.197081478 | OXLD1      |
| ENSG00000250056 | 10.03093378 | 3.647978261 | 1.467905172  | 0.112912708 | 0.197229063 | LINC01018  |
| ENSG00000167107 | 346.0015557 | 546.414991  | -0.658863199 | 0.112939822 | 0.197262342 | ACSF2      |

|                 |             |             |              |             |             |            |
|-----------------|-------------|-------------|--------------|-------------|-------------|------------|
| ENSG00000237943 | 19.55228606 | 8.438833479 | 1.202254129  | 0.112946946 | 0.197262342 | PRKCQ-AS1  |
| ENSG00000240288 | 38.60946494 | 20.21613247 | 0.940758561  | 0.113010995 | 0.197347046 | GHRLOS     |
| ENSG00000101546 | 249.1065285 | 327.6219309 | -0.39569281  | 0.113015549 | 0.197347046 | RBFA       |
| ENSG00000278389 | 9.013922079 | 1.782695063 | 2.334725685  | 0.113023598 | 0.197347046 | AC099518.6 |
| novel.52        | 6.94612109  | 2.180528143 | 1.681065288  | 0.113025828 | 0.197347046 | -          |
| ENSG00000249693 | 0           | 3.718798035 | -4.473010295 | 0.113041705 | 0.197361504 | THEGL      |
| ENSG00000259511 | 12.37309961 | 5.299646263 | 1.214710574  | 0.113177022 | 0.197576424 | UBE2Q2L    |
| ENSG00000120217 | 73.86867042 | 40.44287742 | 0.873499367  | 0.113180013 | 0.197576424 | CD274      |
| ENSG00000258790 | 1.833766717 | 6.430626464 | -1.817619888 | 0.113195561 | 0.19759029  | AL121594.1 |
| ENSG00000223198 | 0.293240848 | 2.853467977 | -3.133821471 | 0.113315804 | 0.197786893 | RNU2-22P   |
| ENSG00000230612 | 5.117368968 | 1.029478846 | 2.279819865  | 0.113334941 | 0.197794678 | AC004039.1 |
| ENSG00000285437 | 14.27588863 | 38.10881298 | -1.411578334 | 0.11333549  | 0.197794678 | POLR2J3    |
| ENSG00000117697 | 657.5314438 | 466.5833854 | 0.494234169  | 0.113367653 | 0.19783752  | NSL1       |
| ENSG00000146109 | 457.3383258 | 573.4799211 | -0.32658832  | 0.113454315 | 0.197975455 | ABT1       |
| ENSG00000271503 | 2.756327131 | 0           | 3.794852471  | 0.11350042  | 0.198029307 | CCL5       |
| ENSG00000279791 | 2.756327131 | 0           | 3.794852471  | 0.11350042  | 0.198029307 | AC018892.3 |
| ENSG00000213713 | 95.26411165 | 60.80809827 | 0.649041253  | 0.113510904 | 0.1980343   | PIGCP1     |
| ENSG00000126950 | 29.85278355 | 6.245252705 | 2.260094756  | 0.113553655 | 0.198095582 | TMEM35A    |
| ENSG00000263823 | 15.15213496 | 5.13793762  | 1.541538028  | 0.113583595 | 0.198134509 | AC009831.1 |
| ENSG00000255146 | 2.753819833 | 0           | 3.793672017  | 0.113633186 | 0.198194402 | AP004247.2 |
| ENSG00000271850 | 2.753819833 | 0           | 3.793672017  | 0.113633186 | 0.198194402 | LINC02343  |
| ENSG00000272795 | 2.71348926  | 0           | 3.774482936  | 0.113734378 | 0.198344266 | AC126283.1 |
| ENSG00000080293 | 2.71348926  | 0           | 3.774482936  | 0.113734378 | 0.198344266 | SCTR       |
| ENSG00000273720 | 5.306058071 | 0.356539013 | 3.781626068  | 0.113753072 | 0.198363553 | AC091812.2 |
| ENSG00000165879 | 89.99569122 | 57.67006693 | 0.642463927  | 0.113848216 | 0.198516142 | FRAT1      |
| ENSG00000280149 | 19.80652125 | 9.436346474 | 1.073329052  | 0.113866283 | 0.198526685 | AC004877.2 |
| ENSG00000179178 | 7.649762288 | 2.191140629 | 1.812631338  | 0.113869545 | 0.198526685 | TMEM125    |
| ENSG00000237629 | 2.709728314 | 0           | 3.77269418   | 0.113936892 | 0.198564153 | UQCRHP2    |
| ENSG00000272239 | 2.709728314 | 0           | 3.77269418   | 0.113936892 | 0.198564153 | AC011373.1 |
| ENSG00000257335 | 2.709728314 | 0           | 3.77269418   | 0.113936892 | 0.198564153 | MGAM       |
| ENSG00000229019 | 2.709728314 | 0           | 3.77269418   | 0.113936892 | 0.198564153 | AL161457.1 |
| ENSG00000273082 | 2.709728314 | 0           | 3.77269418   | 0.113936892 | 0.198564153 | Z73429.1   |
| ENSG00000158764 | 2.709728314 | 0           | 3.77269418   | 0.113936892 | 0.198564153 | ITLN2      |
| ENSG00000155729 | 452.4887687 | 357.1830415 | 0.341648034  | 0.113990197 | 0.198643726 | KCTD18     |
| ENSG00000146963 | 1006.834299 | 761.7848516 | 0.402392386  | 0.114019878 | 0.198682123 | LUC7L2     |
| ENSG00000198836 | 1112.119327 | 1371.530764 | -0.302568434 | 0.114081226 | 0.198775692 | OPA1       |
| ENSG00000118432 | 307.7663209 | 1514.3525   | -2.298834892 | 0.114092803 | 0.198782532 | CNR1       |
| ENSG00000126259 | 4.303192516 | 0           | 4.438188366  | 0.114178897 | 0.198919192 | KIRREL2    |
| ENSG00000133858 | 1040.54121  | 1339.595122 | -0.364253051 | 0.114214777 | 0.19896836  | ZFC3H1     |
| ENSG00000207864 | 5.127469429 | 1.049547942 | 2.269017043  | 0.114260138 | 0.199034036 | MIR27B     |
| ENSG00000160404 | 278.4821116 | 207.6796077 | 0.42232761   | 0.114291147 | 0.199074704 | TOR2A      |
| ENSG00000179950 | 221.1189242 | 338.9364505 | -0.616736491 | 0.114300057 | 0.199076877 | PUF60      |
| ENSG00000143207 | 512.3291183 | 631.8367512 | -0.30247059  | 0.114418513 | 0.199269835 | COP1       |
| ENSG00000004864 | 428.6986231 | 332.7531432 | 0.36609534   | 0.114427442 | 0.199272026 | SLC25A13   |
| ENSG00000108091 | 749.5422108 | 942.5311164 | -0.330632542 | 0.114544506 | 0.199462522 | CCDC6      |
| ENSG00000260062 | 0           | 3.780161198 | -4.495343611 | 0.114556897 | 0.199470728 | GOLGA2P11  |
| ENSG00000131626 | 1245.195196 | 997.2607945 | 0.320390225  | 0.114579599 | 0.199496887 | PPFIA1     |
| ENSG00000279853 | 4.208669961 | 0.693008929 | 2.573501312  | 0.114615388 | 0.199545828 | AC004453.2 |
| ENSG00000224831 | 57.60299211 | 85.85527133 | -0.576634839 | 0.114636063 | 0.19954728  | TMEM183B   |
| ENSG00000272088 | 5.390480164 | 0.713078025 | 2.914004458  | 0.11463876  | 0.19954728  | AL512413.1 |
| ENSG00000279329 | 26.13836656 | 13.8895759  | 0.907757461  | 0.114645259 | 0.19954728  | AC020910.5 |

|                 |             |             |              |             |             |             |
|-----------------|-------------|-------------|--------------|-------------|-------------|-------------|
| ENSG00000230373 | 36.38041292 | 18.44404989 | 0.988718009  | 0.114646944 | 0.19954728  | GOLGA6L5P   |
| ENSG00000254094 | 1.186824798 | 5.381078522 | -2.167413408 | 0.114686889 | 0.199603435 | AC078852.2  |
| ENSG00000148985 | 262.0259927 | 330.6825928 | -0.335564868 | 0.114709981 | 0.199630251 | PGAP2       |
| ENSG00000258317 | 8.178291056 | 2.822786395 | 1.522614725  | 0.114729605 | 0.19965103  | AC034102.7  |
| ENSG00000167333 | 278.2121488 | 190.2335843 | 0.546882959  | 0.11476587  | 0.199700761 | TRIM68      |
| novel.543       | 41.17334202 | 68.26568222 | -0.729177591 | 0.114785574 | 0.199721671 | -           |
| ENSG00000243902 | 0.61420451  | 4.361056287 | -2.835634532 | 0.114831041 | 0.199766009 | FP325335.1  |
| novel.549       | 102.8489689 | 195.1085556 | -0.923975131 | 0.114833202 | 0.199766009 | -           |
| ENSG00000259916 | 4.16583209  | 0           | 4.393471005  | 0.114834123 | 0.199766009 | AL845331.2  |
| ENSG00000129484 | 492.0812268 | 657.6205734 | -0.417857955 | 0.114875093 | 0.199823902 | PARP2       |
| ENSG00000066422 | 561.514814  | 441.0781592 | 0.348109832  | 0.114930811 | 0.199907439 | ZBTB11      |
| ENSG00000275714 | 0           | 2.446178286 | -3.876472282 | 0.114950528 | 1           | HIST1H3A    |
| ENSG00000230189 | 0           | 2.446178286 | -3.876472282 | 0.114950528 | 1           | AC008267.2  |
| ENSG00000286736 | 4.428842826 | 0           | 4.482145299  | 0.114966763 | 0.199956584 | AC005753.2  |
| ENSG00000271555 | 2.728604316 | 0           | 3.781689852  | 0.114984919 | 0.199961392 | AC113139.1  |
| ENSG00000141668 | 2.728604316 | 0           | 3.781689852  | 0.114984919 | 0.199961392 | CBLN2       |
| ENSG00000267776 | 5.411863464 | 1.060160428 | 2.342555782  | 0.115028196 | 0.200023261 | AC006116.10 |
| ENSG00000183665 | 147.0759243 | 196.9481322 | -0.422430821 | 0.11505649  | 0.200059074 | TRMT12      |
| ENSG00000178188 | 1631.744522 | 1316.448773 | 0.309968618  | 0.115077266 | 0.200081808 | SH2B1       |
| ENSG00000147231 | 17.93590017 | 36.65582816 | -1.028128114 | 0.115088337 | 0.200087666 | RADX        |
| ENSG00000252206 | 1.774560141 | 7.65365141  | -2.093978977 | 0.115141719 | 0.200167079 | RNU7-40P    |
| ENSG00000065989 | 287.4624978 | 494.367251  | -0.78194894  | 0.115241783 | 0.200327631 | PDE4A       |
| ENSG00000114124 | 2.723589721 | 0           | 3.779310269  | 0.115256107 | 0.200330166 | GRK7        |
| ENSG00000283156 | 6.640272484 | 1.742556871 | 1.910112432  | 0.115258663 | 0.200330166 | AC068620.3  |
| ENSG00000166136 | 321.9623751 | 230.2193208 | 0.484795646  | 0.115282686 | 0.200346682 | NDUFB8      |
| ENSG00000112308 | 3446.51611  | 2658.231807 | 0.374582019  | 0.115283588 | 0.200346682 | C6orf62     |
| ENSG00000231811 | 4.271637483 | 0           | 4.428015579  | 0.115311324 | 0.200381481 | AL159166.1  |
| ENSG00000206503 | 449.952315  | 2392.716925 | -2.410818692 | 0.115321607 | 0.200385946 | HLA-A       |
| ENSG00000112186 | 148.5898384 | 99.2367797  | 0.584246819  | 0.115387155 | 0.200486435 | CAP2        |
| ENSG00000119979 | 424.7380185 | 557.0391642 | -0.391124374 | 0.115452276 | 0.200586171 | FAM45A      |
| ENSG00000240303 | 6.080259955 | 1.406086955 | 2.096323445  | 0.115520468 | 0.200691226 | ACAD11      |
| ENSG00000174032 | 418.7760139 | 272.3931148 | 0.620141644  | 0.11561217  | 0.200837071 | SLC25A30    |
| ENSG00000265190 | 1.843867178 | 7.632426439 | -2.054454447 | 0.115619879 | 0.200837071 | ANXA8       |
| ENSG00000278146 | 4.558610087 | 0.713078025 | 2.669303744  | 0.11565992  | 0.200893193 | AC012409.4  |
| ENSG00000146729 | 1097.19463  | 900.0154111 | 0.286023192  | 0.115717417 | 0.200979625 | NIPSNAP2    |
| ENSG00000153339 | 757.1889832 | 612.149864  | 0.306737407  | 0.115731604 | 0.200990829 | TRAPPC8     |
| ENSG00000137492 | 982.5041957 | 775.3430475 | 0.341381492  | 0.115767175 | 0.201039167 | THAP12      |
| ENSG00000132478 | 795.5023444 | 625.516312  | 0.346883418  | 0.11582262  | 0.201122008 | UNK         |
| ENSG00000270020 | 7.156193493 | 1.803920035 | 1.99455471   | 0.115835888 | 0.201131606 | AC009108.3  |
| ENSG00000186976 | 32.99727352 | 17.20108424 | 0.94071172   | 0.115891417 | 0.201214575 | EFCAB6      |
| ENSG00000232633 | 7.930395377 | 1.548882377 | 2.394862816  | 0.115904696 | 0.201224184 | AC079465.1  |
| ENSG00000166086 | 2435.47722  | 1924.912271 | 0.339456961  | 0.115946775 | 0.201283787 | JAM3        |
| ENSG00000267546 | 11.24422774 | 4.330374705 | 1.378399431  | 0.116019238 | 0.201396126 | AC015802.4  |
| ENSG00000078061 | 848.996615  | 1074.592616 | -0.340163514 | 0.116038736 | 0.201416516 | ARAF        |
| ENSG00000260367 | 5.410609815 | 13.11744646 | -1.277586996 | 0.116079635 | 0.201474046 | AC109460.1  |
| ENSG00000100678 | 9.191613078 | 35.05092963 | -1.930502229 | 0.116098414 | 0.201493179 | SLC8A3      |
| ENSG00000145216 | 302.3035282 | 391.0539228 | -0.37152773  | 0.11618682  | 0.201619919 | FIP1L1      |
| ENSG00000105732 | 350.3162605 | 453.2165867 | -0.371590313 | 0.116186961 | 0.201619919 | ZNF574      |
| ENSG00000236114 | 12.7683849  | 2.691759334 | 2.2224396    | 0.116202694 | 0.201633754 | AL450326.2  |
| ENSG00000141449 | 7.610685363 | 16.0818724  | -1.083180525 | 0.116233051 | 0.20166539  | GREB1L      |
| ENSG00000181817 | 621.9953659 | 466.9354297 | 0.41308888   | 0.11623645  | 0.20166539  | LSM10       |

|                 |             |             |              |             |             |            |
|-----------------|-------------|-------------|--------------|-------------|-------------|------------|
| ENSG00000130783 | 16.21295344 | 6.980711577 | 1.228318894  | 0.116264288 | 0.201700219 | CCDC62     |
| ENSG00000165240 | 289.4278708 | 223.5416531 | 0.372985576  | 0.116277982 | 0.201710506 | ATP7A      |
| ENSG00000057935 | 539.1704419 | 689.3869987 | -0.354460478 | 0.116374626 | 0.20186468  | MTA3       |
| ENSG00000262049 | 46.04127692 | 28.39175595 | 0.699226551  | 0.11643244  | 0.20195148  | AC139530.2 |
| ENSG00000124216 | 107.1165169 | 223.1328008 | -1.059778782 | 0.116461437 | 0.201987315 | SNAI1      |
| ENSG00000159200 | 4520.467324 | 2775.281691 | 0.703936177  | 0.116468649 | 0.201987315 | RCAN1      |
| novel.219       | 2.698374204 | 0           | 3.767228459  | 0.11663801  | 0.202159583 | -          |
| ENSG00000242829 | 2.698374204 | 0           | 3.767228459  | 0.11663801  | 0.202159583 | RPS26P21   |
| ENSG00000272218 | 2.698374204 | 0           | 3.767228459  | 0.11663801  | 0.202159583 | AC108865.2 |
| ENSG00000235974 | 2.698374204 | 0           | 3.767228459  | 0.11663801  | 0.202159583 | VN2R19P    |
| ENSG00000287379 | 2.698374204 | 0           | 3.767228459  | 0.11663801  | 0.202159583 | AC006144.2 |
| ENSG00000229677 | 2.698374204 | 0           | 3.767228459  | 0.11663801  | 0.202159583 | AC018644.1 |
| ENSG00000286506 | 2.698374204 | 0           | 3.767228459  | 0.11663801  | 0.202159583 | FP325317.2 |
| ENSG00000231544 | 2.698374204 | 0           | 3.767228459  | 0.11663801  | 0.202159583 | RSL24D1P11 |
| ENSG00000260685 | 2.698374204 | 0           | 3.767228459  | 0.11663801  | 0.202159583 | AC027104.1 |
| ENSG00000137269 | 134.4814419 | 69.18600095 | 0.956929817  | 0.116652062 | 0.20217045  | LRRC1      |
| ENSG00000171940 | 862.2973201 | 1459.759101 | -0.759280126 | 0.116700706 | 0.202241264 | ZNF217     |
| ENSG00000155858 | 145.8675027 | 193.2245351 | -0.405779723 | 0.116769824 | 0.202300094 | LSM11      |
| ENSG00000270424 | 2.695866906 | 0           | 3.766029196  | 0.116776516 | 0.202300094 | AC145285.5 |
| ENSG00000167858 | 2.695866906 | 0           | 3.766029196  | 0.116776516 | 0.202300094 | TEKT1      |
| ENSG00000250677 | 2.695866906 | 0           | 3.766029196  | 0.116776516 | 0.202300094 | AC114781.3 |
| ENSG00000252950 | 2.695866906 | 0           | 3.766029196  | 0.116776516 | 0.202300094 | RNA5SP490  |
| ENSG00000228794 | 376.2102513 | 257.9380082 | 0.544564438  | 0.116781371 | 0.202300094 | LINC01128  |
| ENSG00000057757 | 1116.079573 | 823.9513814 | 0.437537694  | 0.116801674 | 0.202321773 | PITHD1     |
| ENSG00000270104 | 0.293240848 | 2.873537073 | -3.142148403 | 0.11681689  | 0.202334641 | AL670729.2 |
| ENSG00000059758 | 986.140732  | 696.1843786 | 0.502747557  | 0.116850852 | 0.202379974 | CDK17      |
| ENSG00000130876 | 16.55830625 | 2.975038428 | 2.485275227  | 0.116999685 | 0.202624237 | SLC7A10    |
| ENSG00000239665 | 444.7804443 | 242.352037  | 0.876594843  | 0.117061671 | 0.202718075 | AL157392.3 |
| ENSG00000178401 | 14.00814803 | 35.7991028  | -1.358144273 | 0.117143599 | 0.202846431 | DNAJC22    |
| ENSG00000183161 | 251.6027791 | 192.89158   | 0.382350137  | 0.117172839 | 0.20288354  | FANCF      |
| ENSG00000285677 | 7.108341027 | 1.467450118 | 2.292299508  | 0.117198497 | 0.202914445 | AL355388.3 |
| ENSG00000118307 | 8.460177794 | 1.682349583 | 2.297852242  | 0.11723269  | 0.20296012  | CASC1      |
| ENSG00000137760 | 229.7518493 | 176.9301221 | 0.376268418  | 0.117251441 | 0.202979057 | ALKBH8     |
| ENSG00000151718 | 688.5083267 | 942.3017853 | -0.45283413  | 0.117291645 | 0.203035127 | WWC2       |
| ENSG00000174099 | 774.1662475 | 1202.739107 | -0.635824762 | 0.117336228 | 0.203095079 | MSRB3      |
| ENSG00000261715 | 0.307102255 | 4.106018629 | -3.6523132   | 0.117346741 | 0.203095079 | LINC01477  |
| ENSG00000256894 | 17.8404087  | 8.794088222 | 1.031477801  | 0.11734973  | 0.203095079 | AC022509.3 |
| ENSG00000181904 | 1272.110927 | 1550.661356 | -0.285621764 | 0.117380112 | 0.20313413  | C5orf24    |
| ENSG00000206228 | 5.464801796 | 13.54596112 | -1.312327034 | 0.117419295 | 0.203188405 | HNRNPA1P4  |
| ENSG00000142235 | 12.23860249 | 33.87878375 | -1.467927416 | 0.117427672 | 0.203189368 | LMTK3      |
| ENSG00000268731 | 4.706968617 | 0           | 4.570034287  | 0.117469168 | 0.203234098 | AC010615.3 |
| ENSG00000278847 | 4.706968617 | 0           | 4.570034287  | 0.117469168 | 0.203234098 | AC006157.1 |
| ENSG00000271550 | 8.211028466 | 2.884149558 | 1.511311651  | 0.117495055 | 0.203265351 | BNIP3P11   |
| ENSG00000283657 | 4.705714968 | 0           | 4.569665244  | 0.117509763 | 0.203277258 | AC074101.1 |
| ENSG00000259456 | 34.76585016 | 21.3602937  | 0.699281252  | 0.117551454 | 0.203335841 | ADNP-AS1   |
| ENSG00000253194 | 7.250716047 | 2.211209725 | 1.731529265  | 0.117583705 | 0.203378086 | AL137009.1 |
| ENSG00000273687 | 4.793898008 | 1.080229524 | 2.155489063  | 0.117612535 | 0.20340453  | AC004223.4 |
| ENSG00000197858 | 2039.031416 | 2756.891279 | -0.435271693 | 0.117614651 | 0.20340453  | GPAA1      |
| ENSG00000196756 | 348.3854646 | 569.2064873 | -0.708528222 | 0.117633176 | 0.20341977  | SNHG17     |
| ENSG00000196937 | 1721.003404 | 2151.543307 | -0.322094942 | 0.117639122 | 0.20341977  | FAM3C      |
| ENSG00000164252 | 438.1427466 | 349.836895  | 0.324156356  | 0.117658883 | 0.2034404   | AGGF1      |

|                 |             |             |              |             |             |            |
|-----------------|-------------|-------------|--------------|-------------|-------------|------------|
| ENSG00000161091 | 1354.052853 | 1894.81311  | -0.484582503 | 0.117672577 | 0.203444437 | MFSD12     |
| ENSG00000266975 | 0.615458159 | 5.144954086 | -3.070359541 | 0.117676879 | 0.203444437 | FARSA-AS1  |
| ENSG00000244063 | 4.600194309 | 0.723690511 | 2.672794065  | 0.117713091 | 0.203493501 | AC104653.2 |
| ENSG00000119321 | 949.2115887 | 1158.082391 | -0.286804508 | 0.117762698 | 0.203565712 | FKBP15     |
| ENSG00000202111 | 2.158491326 | 14.06677732 | -2.711458198 | 0.117780701 | 0.203583287 | VTRNA1-2   |
| ENSG00000174013 | 321.6637206 | 419.3386076 | -0.382809847 | 0.117815533 | 0.203629947 | FBXO45     |
| ENSG00000230148 | 29.45742698 | 68.75320112 | -1.223408163 | 0.117959229 | 0.203864747 | HOXB-AS1   |
| ENSG00000169925 | 734.5243751 | 587.6566289 | 0.321728886  | 0.118155558 | 0.204190472 | BRD3       |
| ENSG00000174206 | 130.0838256 | 93.18815521 | 0.478794321  | 0.118184071 | 0.204226163 | C12orf66   |
| ENSG00000213801 | 28.43490249 | 14.0335272  | 1.021594317  | 0.118292043 | 0.204399146 | ZNF321P    |
| ENSG00000274214 | 5.193015519 | 0.356539013 | 3.747831979  | 0.118407025 | 0.20458422  | AP005212.2 |
| ENSG00000273091 | 9.231587646 | 1.548882377 | 2.610198996  | 0.118428615 | 0.204607916 | AP000255.1 |
| ENSG00000152284 | 460.5498015 | 341.6415064 | 0.430543302  | 0.118469547 | 0.204665025 | TCF7L1     |
| ENSG00000123908 | 781.6525284 | 1084.417792 | -0.472223605 | 0.118503791 | 0.204710571 | AGO2       |
| ENSG00000151067 | 16.47492399 | 34.65006129 | -1.074945194 | 0.118516025 | 0.204718093 | CACNA1C    |
| ENSG00000213995 | 1289.192546 | 1043.915268 | 0.304284317  | 0.118547684 | 0.204759166 | NAXD       |
| ENSG00000197978 | 8.394702974 | 20.04869163 | -1.25643829  | 0.118560838 | 0.204760619 | GOLGA6L9   |
| ENSG00000006042 | 1934.127694 | 1348.07299  | 0.520682346  | 0.118564288 | 0.204760619 | TMEM98     |
| ENSG00000157483 | 1696.773037 | 2612.881834 | -0.622767777 | 0.118604179 | 0.204815898 | MYO1E      |
| ENSG00000277728 | 0.61420451  | 4.433031935 | -2.855646493 | 0.11862488  | 0.204836845 | AC097641.2 |
| ENSG00000177106 | 632.6107054 | 419.9648252 | 0.590966978  | 0.118632078 | 0.204836845 | EPS8L2     |
| ENSG00000239462 | 0.293240848 | 4.075337048 | -3.642437562 | 0.118649586 | 0.204853462 | AC091212.1 |
| ENSG00000270362 | 42.85506053 | 25.61039202 | 0.738745563  | 0.118814738 | 0.205124971 | HMG3-AS1   |
| ENSG00000185972 | 5.487438745 | 14.50218005 | -1.402556605 | 0.118918319 | 0.205284074 | CCIN       |
| ENSG00000165006 | 926.9313669 | 1152.004755 | -0.313460658 | 0.118930744 | 0.205284074 | UBAP1      |
| ENSG00000135002 | 691.347437  | 512.2063465 | 0.432133727  | 0.118936603 | 0.205284074 | RFK        |
| ENSG00000248896 | 6.845330292 | 1.406086955 | 2.272920001  | 0.1189385   | 0.205284074 | AC105001.1 |
| ENSG00000005102 | 37.37557095 | 9.822282798 | 1.934589588  | 0.118953877 | 0.205292553 | MEOX1      |
| novel.675       | 68.57772706 | 124.9166729 | -0.866634952 | 0.118959216 | 0.205292553 | -          |
| ENSG00000152669 | 11.90377742 | 4.586568238 | 1.365004418  | 0.11898603  | 0.205325189 | CCNO       |
| ENSG00000287180 | 5.419456628 | 1.10029862  | 2.316305456  | 0.119010647 | 0.205354029 | AC106818.2 |
| ENSG00000243679 | 230.4615891 | 142.6528162 | 0.692665217  | 0.11904874  | 0.205406117 | AC018638.5 |
| ENSG00000233056 | 6.228618484 | 1.049547942 | 2.555461476  | 0.119080586 | 0.205447421 | ERVH48-1   |
| ENSG00000269439 | 109.3410685 | 63.46087529 | 0.785488834  | 0.119133103 | 0.20552438  | AC010618.4 |
| ENSG00000234882 | 29.58551367 | 16.21533961 | 0.860880707  | 0.119169514 | 0.205573543 | EIF3EP1    |
| ENSG00000074966 | 7.960625489 | 1.813376645 | 2.137500374  | 0.119258196 | 0.205712865 | TXK        |
| ENSG00000204758 | 8.360640644 | 22.05330262 | -1.396988313 | 0.119270664 | 0.205720714 | AC008429.1 |
| ENSG00000269533 | 4.559863736 | 0.713078025 | 2.669742552  | 0.119291917 | 0.205743713 | AC003002.3 |
| ENSG00000272632 | 5.842464737 | 0.693008929 | 3.050872795  | 0.119344483 | 0.205820711 | AC097504.2 |
| ENSG00000248712 | 24.18500431 | 11.88368064 | 1.026932205  | 0.11942945  | 0.20595194  | CCDC153    |
| ENSG00000267141 | 1.54052587  | 7.051531351 | -2.197325423 | 0.11943643  | 0.20595194  | AC012615.4 |
| ENSG00000125952 | 1378.380313 | 1048.646978 | 0.394436056  | 0.119501487 | 0.206044393 | MAX        |
| ENSG00000147912 | 167.3918848 | 125.4958513 | 0.414050364  | 0.119505906 | 0.206044393 | FBXO10     |
| ENSG00000234336 | 4.238900074 | 0.743759607 | 2.540141051  | 0.119524204 | 0.206062266 | JAZF1-AS1  |
| ENSG00000021776 | 674.0087486 | 865.4238401 | -0.360413583 | 0.119587515 | 0.206157736 | AQR        |
| ENSG00000274628 | 5.119876265 | 0.672939833 | 2.882161463  | 0.119610439 | 0.206169771 | AL669942.1 |
| ENSG00000169902 | 516.4117375 | 807.9799965 | -0.645601538 | 0.119616107 | 0.206169771 | TPST1      |
| ENSG00000100601 | 152.3350279 | 213.6401214 | -0.487461785 | 0.119618303 | 0.206169771 | ALKBH1     |
| ENSG00000224046 | 15.29193141 | 5.178075812 | 1.545963313  | 0.119633353 | 0.206182033 | AC005076.1 |
| ENSG00000175548 | 240.3039321 | 180.6349685 | 0.410893198  | 0.119649486 | 0.206196159 | ALG10B     |
| ENSG00000256448 | 3.28360225  | 0.387220594 | 3.090042879  | 0.119694698 | 0.206260394 | AP000763.3 |



|                 |             |             |              |             |             |              |
|-----------------|-------------|-------------|--------------|-------------|-------------|--------------|
| ENSG00000227706 | 0           | 3.741307276 | -4.489116392 | 0.119707083 | 0.206268054 | AL713998.1   |
| ENSG00000156469 | 280.8369568 | 364.2674034 | -0.375928803 | 0.119730213 | 0.206294229 | MTERF3       |
| ENSG00000140795 | 13.89983534 | 4.495679368 | 1.614024557  | 0.119832818 | 0.206457324 | MYLK3        |
| ENSG00000176182 | 172.4302023 | 256.2012179 | -0.570283637 | 0.119853512 | 0.206479286 | MYPOP        |
| ENSG00000170542 | 1048.535769 | 749.5386174 | 0.484666847  | 0.119873337 | 0.206499745 | SERPIN9      |
| ENSG00000203804 | 27.76142013 | 10.77045778 | 1.367156168  | 0.119888969 | 0.206512981 | ADAMTSL4-AS1 |
| ENSG00000264061 | 4.146956088 | 0           | 4.387189651  | 0.11994913  | 0.206602914 | FGF7P1       |
| ENSG00000104219 | 893.0693837 | 562.1712062 | 0.667339329  | 0.120055485 | 0.206772393 | ZDHHC2       |
| ENSG00000287104 | 81.68136431 | 46.88308889 | 0.802418954  | 0.120123329 | 0.206843866 | AC097382.3   |
| ENSG00000184708 | 576.2050068 | 427.2533672 | 0.432037532  | 0.120130554 | 0.206843866 | EIF4ENIF1    |
| novel.1025      | 4.001104856 | 0           | 4.332999873  | 0.12014364  | 0.206843866 | -            |
| ENSG00000275569 | 4.001104856 | 0           | 4.332999873  | 0.12014364  | 0.206843866 | AL355073.2   |
| ENSG00000117215 | 4.001104856 | 0           | 4.332999873  | 0.12014364  | 0.206843866 | PLA2G2D      |
| novel.655       | 2.125753916 | 7.469433526 | -1.804598428 | 0.120144751 | 0.206843866 | -            |
| ENSG00000274833 | 3.979721556 | 0.336469917 | 3.363178122  | 0.120210768 | 0.206943808 | AC110285.5   |
| ENSG00000230212 | 8.019547331 | 2.160459047 | 1.897591324  | 0.120227209 | 0.20694976  | AP000688.1   |
| ENSG00000103066 | 573.0723406 | 748.9678596 | -0.386465835 | 0.120230156 | 0.20694976  | PLA2G15      |
| ENSG00000239096 | 3.28360225  | 0.356539013 | 3.090030403  | 0.120268435 | 0.207001936 | RF01210      |
| ENSG00000166263 | 257.5688576 | 181.7781022 | 0.501704496  | 0.120283096 | 0.207013456 | STXBP4       |
| ENSG00000188386 | 2.75758078  | 0           | 3.795520218  | 0.120335103 | 0.207075527 | PPP3R2       |
| ENSG00000287926 | 2.75758078  | 0           | 3.795520218  | 0.120335103 | 0.207075527 | AC113208.4   |
| ENSG00000170456 | 296.4264595 | 392.0308397 | -0.403560098 | 0.120347272 | 0.207082751 | DENND5B      |
| ENSG00000110002 | 275.282718  | 156.9900424 | 0.808776307  | 0.120398403 | 0.207157015 | VWA5A        |
| ENSG00000182264 | 2.752566185 | 0           | 3.793147077  | 0.120613632 | 0.207513593 | IZUMO1       |
| ENSG00000149043 | 4.884588345 | 0.713078025 | 2.768737171  | 0.120627539 | 0.207523778 | SYT8         |
| ENSG00000205090 | 79.3560379  | 114.1062396 | -0.521693857 | 0.120659058 | 0.207564257 | TMEM240      |
| ENSG00000109472 | 1508.45806  | 788.2457576 | 0.936361045  | 0.120725165 | 0.207664229 | CPE          |
| ENSG00000249476 | 15.71089384 | 6.981995847 | 1.156823448  | 0.120758174 | 0.207682172 | AC008467.1   |
| ENSG00000211638 | 4.314475354 | 0           | 4.441846243  | 0.120761488 | 0.207682172 | IGLV8-61     |
| ENSG00000000005 | 4.314475354 | 0           | 4.441846243  | 0.120761488 | 0.207682172 | TNMD         |
| ENSG00000074582 | 608.2280779 | 896.4243053 | -0.559771775 | 0.120767571 | 0.207682172 | BCS1L        |
| ENSG00000275805 | 2.961384939 | 0           | 3.902618597  | 0.120809678 | 0.207740833 | AC090206.1   |
| ENSG00000162620 | 10.69682297 | 21.63527205 | -1.018500856 | 0.12084935  | 0.207795299 | LRRIQ3       |
| ENSG00000156500 | 71.90284261 | 99.19587081 | -0.463329506 | 0.120907894 | 0.207882205 | FAM122C      |
| ENSG00000156973 | 355.843986  | 486.354856  | -0.450359443 | 0.120920311 | 0.207889797 | PDE6D        |
| ENSG00000203644 | 78.61367578 | 52.36083566 | 0.590172796  | 0.120979063 | 0.207977043 | AC083799.1   |
| ENSG00000132768 | 319.4237136 | 403.9488923 | -0.339143544 | 0.1210002   | 0.207999616 | DPH2         |
| ENSG00000164758 | 228.9141383 | 178.4471671 | 0.358497889  | 0.121043123 | 0.208059635 | MED30        |
| ENSG00000274678 | 2.743719372 | 0           | 3.788920956  | 0.12110904  | 0.208159167 | AC106886.3   |
| ENSG00000100271 | 132.9481807 | 173.863039  | -0.388203548 | 0.12112047  | 0.208165041 | TTLL1        |
| ENSG00000274124 | 5.362757349 | 0.713078025 | 2.907293548  | 0.121159118 | 0.20821769  | AC074029.3   |
| ENSG00000100350 | 286.4472535 | 431.1404021 | -0.5905057   | 0.121181696 | 0.208242718 | FOXRED2      |
| ENSG00000273189 | 5.132484024 | 1.110911105 | 2.232517213  | 0.12121842  | 0.208292048 | AC010619.2   |
| ENSG00000165471 | 4.002358504 | 0           | 4.333438182  | 0.121250392 | 0.208333207 | MBL2         |
| ENSG00000238005 | 4.294345703 | 11.58619304 | -1.435662267 | 0.121289094 | 0.208385924 | AL391832.2   |
| ENSG00000122707 | 554.2979736 | 727.943252  | -0.393540805 | 0.121403738 | 0.208569101 | RECK         |
| novel.676       | 5.535291211 | 0.387220594 | 3.839557702  | 0.121447533 | 0.208598195 | -            |
| novel.878       | 0.308355904 | 4.167381792 | -3.672193101 | 0.121458971 | 0.208598195 | -            |
| ENSG00000286141 | 0.307102255 | 4.044655466 | -3.632532276 | 0.121460206 | 0.208598195 | AC097480.2   |
| ENSG00000273198 | 2.737451129 | 0           | 3.785942628  | 0.121460817 | 0.208598195 | AL096803.4   |
| ENSG00000243480 | 2.737451129 | 0           | 3.785942628  | 0.121460817 | 0.208598195 | AMY2A        |

|                 |             |             |              |             |             |            |
|-----------------|-------------|-------------|--------------|-------------|-------------|------------|
| ENSG00000183542 | 4.624084907 | 0           | 4.541933401  | 0.121547101 | 0.208732582 | KLRC4      |
| ENSG00000149798 | 0.601596751 | 3.607840069 | -2.57712157  | 0.121593083 | 0.208797745 | CDC42EP2   |
| ENSG00000153531 | 256.966162  | 593.6377347 | -1.207941155 | 0.121659711 | 0.208898351 | ADPRHL1    |
| ENSG00000124334 | 3.37178529  | 0.336469917 | 3.123169033  | 0.121696382 | 0.208947509 | IL9R       |
| ENSG00000272430 | 14.16026751 | 5.554683921 | 1.335346898  | 0.121790276 | 0.209088877 | LINC02637  |
| ENSG00000286285 | 3.369277992 | 0.336469917 | 3.12223669   | 0.121794814 | 0.209088877 | AL138778.1 |
| ENSG00000161664 | 15.68943927 | 28.23834804 | -0.847784281 | 0.121959502 | 0.209357768 | ASB16      |
| ENSG00000226803 | 22.98181081 | 10.28173583 | 1.15604036   | 0.121983375 | 0.209384915 | ZNF451-AS1 |
| ENSG00000172867 | 4.610223499 | 0           | 4.537755982  | 0.122017527 | 0.209429699 | KRT2       |
| ENSG00000201264 | 4.538480436 | 0.723690511 | 2.655867629  | 0.122030495 | 0.209438121 | SNORD73B   |
| ENSG00000185924 | 25.26003986 | 5.931163635 | 2.095994927  | 0.122055741 | 0.209467614 | RTN4RL1    |
| ENSG00000135341 | 874.7797139 | 1067.671443 | -0.287394916 | 0.122082032 | 0.209498896 | MAP3K7     |
| novel.940       | 4.607787473 | 0           | 4.537029778  | 0.12210002  | 0.209515925 | -          |
| ENSG00000257534 | 3.033199274 | 0.356539013 | 2.972347989  | 0.122203541 | 0.209679711 | AC023794.5 |
| ENSG00000258788 | 0.894837599 | 4.82025253  | -2.41148988  | 0.122244245 | 0.209735701 | CKS1BP1    |
| ENSG00000159882 | 98.72192869 | 68.53244106 | 0.529734436  | 0.122380861 | 0.20995623  | ZNF230     |
| ENSG00000197863 | 121.3915514 | 88.67086568 | 0.454795046  | 0.12239725  | 0.209956877 | ZNF790     |
| ENSG00000275070 | 3.330201067 | 0.387220594 | 3.107550994  | 0.1223974   | 0.209956877 | RF00017    |
| ENSG00000196353 | 1.233423615 | 6.53212782  | -2.412548254 | 0.122431911 | 0.210002209 | CPNE4      |
| ENSG00000124721 | 4.795151656 | 0.713078025 | 2.745092776  | 0.1224599   | 0.210022488 | DNAH8      |
| ENSG00000228487 | 4.795151656 | 0.713078025 | 2.745092776  | 0.1224599   | 0.210022488 | AL450263.1 |
| ENSG00000234076 | 6.353371151 | 1.41669944  | 2.156759048  | 0.122480932 | 0.210044693 | TPRG1-AS1  |
| ENSG00000149201 | 28.41255028 | 16.81501953 | 0.755663373  | 0.122492077 | 0.21004994  | CCDC81     |
| ENSG00000274750 | 27.71044746 | 15.18342062 | 0.869579923  | 0.122516507 | 0.210077967 | HIST1H3E   |
| ENSG00000263916 | 5.101000263 | 1.10029862  | 2.230635937  | 0.122535682 | 0.210091072 | AC100778.2 |
| ENSG00000280387 | 4.519533163 | 0.356539013 | 3.548581639  | 0.122540322 | 0.210091072 | AL109806.1 |
| ENSG00000130413 | 48.05824743 | 89.99308024 | -0.905710563 | 0.122556549 | 0.210091383 | STK33      |
| ENSG00000276417 | 4.79139071  | 0.713078025 | 2.744098995  | 0.122556676 | 0.210091383 | AC092111.2 |
| ENSG00000085224 | 1483.083281 | 1175.67115  | 0.335299804  | 0.122580934 | 0.210119104 | ATRX       |
| ENSG00000122644 | 317.825021  | 184.4646089 | 0.783595827  | 0.122620642 | 0.210160095 | ARL4A      |
| ENSG00000189120 | 11.84833179 | 3.423622185 | 1.814572145  | 0.122621026 | 0.210160095 | SP6        |
| ENSG00000213937 | 3.323932824 | 0.387220594 | 3.105205096  | 0.12264494  | 0.210187216 | CLDN9      |
| ENSG00000063601 | 469.5955908 | 590.7472019 | -0.330735748 | 0.122700649 | 0.210268819 | MTMR1      |
| ENSG00000130177 | 1353.754611 | 1642.296275 | -0.278813432 | 0.12276829  | 0.210370857 | CDC16      |
| ENSG00000233178 | 9.595389179 | 2.272572888 | 2.103837374  | 0.122787636 | 0.210390131 | AL161457.2 |
| ENSG00000231519 | 4.540987734 | 0.713078025 | 2.664627252  | 0.12298411  | 0.210712884 | AC007285.2 |
| ENSG00000272656 | 4.503164458 | 0.743759607 | 2.627093711  | 0.123059793 | 0.21082865  | AC024933.1 |
| ENSG00000222012 | 7.99210925  | 1.854670712 | 2.122870962  | 0.123170424 | 0.211004272 | AC005481.1 |
| ENSG00000278214 | 3.019337866 | 0.336469917 | 2.96681521   | 0.123211301 | 0.211060382 | LINC02139  |
| ENSG00000154359 | 53.67613762 | 28.19718237 | 0.924671066  | 0.123245104 | 0.211104367 | LONRF1     |
| ENSG00000271976 | 93.01585546 | 58.44250034 | 0.666708464  | 0.12328118  | 0.211152241 | AC012467.2 |
| ENSG00000240344 | 483.3862871 | 391.9392748 | 0.302663856  | 0.123336208 | 0.211232565 | PPIL3      |
| ENSG00000286572 | 3.330201067 | 0.336469917 | 3.107550972  | 0.123350218 | 0.211242634 | AL592146.2 |
| ENSG00000171790 | 8.282558066 | 26.39801423 | -1.670577489 | 0.123365502 | 0.211254884 | SLFNL1     |
| ENSG00000136051 | 1642.931652 | 1314.874252 | 0.321527246  | 0.123400084 | 0.211300177 | WASHC4     |
| ENSG00000170214 | 13.37750355 | 35.27610325 | -1.4024546   | 0.123423254 | 0.211325923 | ADRA1B     |
| ENSG00000285373 | 4.52336538  | 0.356539013 | 3.549727903  | 0.123472049 | 0.211395539 | LINC02478  |
| ENSG00000276216 | 3.917936411 | 0           | 4.304127056  | 0.123565094 | 0.211540901 | AC245014.3 |
| ENSG00000120458 | 402.7862704 | 305.2376338 | 0.400267488  | 0.123579366 | 0.211551395 | MSANTD2    |
| ENSG00000214967 | 17.7068805  | 8.060941101 | 1.146368453  | 0.123597606 | 0.211568678 | NPIPA7     |
| ENSG00000139193 | 23.84154589 | 10.26166673 | 1.210211347  | 0.123663001 | 0.211666674 | CD27       |

|                 |             |             |              |             |             |             |
|-----------------|-------------|-------------|--------------|-------------|-------------|-------------|
| novel.449       | 4.003612153 | 0           | 4.333885956  | 0.123680361 | 0.211682441 | -           |
| ENSG00000177459 | 3.944405577 | 0.693008929 | 2.476948938  | 0.123718732 | 0.211734166 | ERICH5      |
| ENSG00000271862 | 24.88348837 | 11.1364534  | 1.159524972  | 0.123761636 | 0.211793641 | AC104118.1  |
| ENSG00000137960 | 28.38636585 | 13.68772906 | 1.043875105  | 0.123770188 | 0.211794326 | GIPC2       |
| ENSG00000272758 | 23.15531359 | 11.23209417 | 1.03633621   | 0.123794014 | 0.211814441 | AC083798.2  |
| ENSG00000168077 | 1229.93273  | 2825.707205 | -1.200067124 | 0.123798248 | 0.211814441 | SCARA3      |
| ENSG00000135272 | 1094.201603 | 724.5577256 | 0.594301689  | 0.123874843 | 0.211931535 | MDFIC       |
| ENSG00000080503 | 1549.059045 | 1052.893411 | 0.556837392  | 0.12396875  | 0.212073496 | SMARCA2     |
| ENSG00000251682 | 10.94944851 | 2.169915658 | 2.33929416   | 0.123974145 | 0.212073496 | AC122718.2  |
| ENSG00000144713 | 10149.27912 | 12989.64187 | -0.355987715 | 0.123983415 | 0.21207539  | RPL32       |
| ENSG00000149634 | 28.38608111 | 13.00160821 | 1.136628771  | 0.124015572 | 0.212116431 | SPATA25     |
| ENSG00000105379 | 632.6612308 | 940.2866103 | -0.571573126 | 0.124025757 | 0.212119886 | ETFB        |
| ENSG00000237512 | 10.29519816 | 3.108505634 | 1.708471273  | 0.124079924 | 0.212198558 | UNC5B-AS1   |
| ENSG00000151304 | 182.2810803 | 240.6498407 | -0.401496977 | 0.124119612 | 0.21225246  | SRFBP1      |
| ENSG00000265539 | 0.293240848 | 2.92428775  | -3.163224908 | 0.124145203 | 0.212282252 | MIR3164     |
| ENSG00000104722 | 43.52639159 | 100.3112298 | -1.204895731 | 0.124201764 | 0.212364991 | NEFM        |
| ENSG00000266256 | 24.50367414 | 67.45280665 | -1.460262408 | 0.124294967 | 0.212510367 | LINC00683   |
| ENSG00000100099 | 801.5447811 | 625.7524368 | 0.357576034  | 0.124323407 | 0.212545005 | HPS4        |
| ENSG00000162298 | 963.522907  | 1237.533305 | -0.360819872 | 0.12436064  | 0.212589903 | SYVN1       |
| ENSG00000277020 | 9.918860139 | 2.731897526 | 1.837283453  | 0.124366034 | 0.212589903 | AL590096.1  |
| ENSG00000150977 | 398.7809888 | 590.2140226 | -0.56563552  | 0.124406909 | 0.212639318 | RILPL2      |
| ENSG00000170291 | 607.7852806 | 793.2333479 | -0.384608803 | 0.124411311 | 0.212639318 | ELP5        |
| ENSG00000008438 | 2.726097019 | 8.090466807 | -1.562461102 | 0.124457538 | 0.212702545 | PGLYRP1     |
| ENSG00000265975 | 12.22216251 | 3.036401591 | 2.028818487  | 0.124464678 | 0.212702545 | AC002091.1  |
| ENSG00000279413 | 14.88034868 | 28.20766646 | -0.924869101 | 0.124486868 | 0.212726475 | AC112497.1  |
| ENSG00000101166 | 742.2030705 | 958.2610046 | -0.368950115 | 0.124516745 | 0.212744219 | PRELID3B    |
| ENSG00000198883 | 3.895299463 | 0           | 4.296181848  | 0.124521817 | 0.212744219 | PNMA5       |
| ENSG00000229484 | 3.895299463 | 0           | 4.296181848  | 0.124521817 | 0.212744219 | AC243836.1  |
| ENSG00000163832 | 503.6517012 | 689.0852515 | -0.452615992 | 0.124532528 | 0.212748529 | ELP6        |
| ENSG00000236540 | 110.5171087 | 70.43701054 | 0.648947642  | 0.124566612 | 0.212792764 | AC006547.1  |
| ENSG00000182000 | 2.683259148 | 0           | 3.759848089  | 0.124575618 | 0.212794157 | PPIAP73     |
| ENSG00000262655 | 96.71841944 | 39.93349126 | 1.273449704  | 0.124608495 | 0.212822912 | SPON1       |
| ENSG00000262313 | 0.293240848 | 2.91483114  | -3.158958674 | 0.124608835 | 0.212822912 | AC127496.3  |
| ENSG00000254762 | 3.914175465 | 0.693008929 | 2.467874766  | 0.124626142 | 0.21283848  | AP001107.7  |
| ENSG00000230710 | 2.682005499 | 0           | 3.759242725  | 0.124648972 | 1           | LINC00332   |
| ENSG00000223652 | 3.912921816 | 0.693008929 | 2.467501382  | 0.124663724 | 0.212888669 | AC106786.1  |
| ENSG00000171161 | 691.4585149 | 526.0555961 | 0.394994805  | 0.124694609 | 0.212927417 | ZNF672      |
| ENSG00000103707 | 203.6305635 | 273.1653386 | -0.424708129 | 0.124729702 | 0.212973343 | MTFMT       |
| ENSG00000234062 | 30.85926786 | 17.90701741 | 0.784616564  | 0.124780093 | 0.213045384 | AL390879.1  |
| ENSG00000273306 | 21.26234029 | 9.171852206 | 1.222355838  | 0.124801888 | 0.213048996 | AC018690.1  |
| ENSG00000266903 | 14.70684591 | 4.250098321 | 1.785274517  | 0.124803962 | 0.213048996 | AC243964.2  |
| ENSG00000007062 | 7.685078266 | 0.774441189 | 3.348106072  | 0.12480681  | 0.213048996 | PROM1       |
| ENSG00000260328 | 0.922560414 | 4.984401318 | -2.445176228 | 0.124829721 | 0.213074108 | AC104024.2  |
| ENSG00000259648 | 4.48930305  | 0.336469917 | 3.539560883  | 0.124895396 | 0.213172204 | AL132640.2  |
| ENSG00000203734 | 14.38420132 | 4.167381792 | 1.806771487  | 0.124991517 | 0.21332225  | ECT2L       |
| ENSG00000103034 | 298.5740675 | 525.7646801 | -0.815882304 | 0.125170832 | 0.21360695  | NDRG4       |
| novel.66        | 9.328546226 | 2.92428775  | 1.684228486  | 0.125174774 | 0.21360695  | -           |
| ENSG00000228839 | 7.473396209 | 1.844058227 | 2.036002018  | 0.12518458  | 0.213609653 | PIK3IP1-AS1 |
| ENSG00000182534 | 5380.946855 | 4049.18563  | 0.410234628  | 0.125225827 | 0.213666002 | MXRA7       |
| ENSG00000218426 | 461.1889914 | 643.6413588 | -0.48084132  | 0.125257565 | 0.213702195 | AL590867.2  |
| ENSG00000264538 | 260.3118932 | 188.0542464 | 0.470102128  | 0.125263559 | 0.213702195 | SUZ12P1     |

|                 |             |             |              |             |             |              |
|-----------------|-------------|-------------|--------------|-------------|-------------|--------------|
| ENSG00000177045 | 128.4478792 | 200.7980388 | -0.644140491 | 0.125271715 | 0.213702195 | SIX5         |
| ENSG00000224870 | 431.2016405 | 321.4566038 | 0.424688353  | 0.12532215  | 0.213774196 | MRPL20-AS1   |
| ENSG00000145982 | 211.3735234 | 278.828412  | -0.40037501  | 0.125366091 | 0.213835111 | FARS2        |
| ENSG00000149483 | 388.9566668 | 542.399805  | -0.480194153 | 0.125385989 | 0.213855011 | TMEM138      |
| ENSG00000106077 | 225.410691  | 314.78704   | -0.482368053 | 0.125402556 | 0.213869227 | ABHD11       |
| ENSG00000280069 | 6.007191971 | 16.31311655 | -1.433493121 | 0.125420642 | 0.213886033 | AC127024.8   |
| ENSG00000184702 | 12.76713126 | 23.25497421 | -0.862937165 | 0.125441567 | 0.213907677 | SEPT5        |
| ENSG00000209042 | 1.802282956 | 6.318512624 | -1.811632626 | 0.125496037 | 0.213986516 | SNORD12C     |
| ENSG00000286116 | 19.71074505 | 8.794216616 | 1.155772961  | 0.125545415 | 0.214056662 | AL157394.2   |
| ENSG00000260454 | 0.600343103 | 3.566546002 | -2.565738714 | 0.12562218  | 0.214173493 | AL355607.2   |
| ENSG00000259895 | 0           | 2.506385574 | -3.907393187 | 0.125656084 | 1           | AC106820.2   |
| ENSG00000222389 | 0           | 2.506385574 | -3.907393187 | 0.125656084 | 1           | RNU2-28P     |
| ENSG00000264044 | 0           | 2.506385574 | -3.907393187 | 0.125656084 | 1           | AC005726.2   |
| ENSG00000213642 | 0.307102255 | 4.61596555  | -3.819515581 | 0.125656363 | 0.214217715 | AC016769.1   |
| ENSG00000197057 | 7.400541689 | 0           | 5.220888966  | 0.125691905 | 0.214264246 | DTHD1        |
| ENSG00000066117 | 713.28916   | 938.0500438 | -0.395142254 | 0.125730607 | 0.214316159 | SMARCD1      |
| novel.847       | 29.75246347 | 8.445849944 | 1.821212103  | 0.12575285  | 0.214340011 | -            |
| novel.640       | 32.11944537 | 62.25342433 | -0.957017227 | 0.125821209 | 0.214442458 | -            |
| ENSG00000267122 | 0.600343103 | 3.557089392 | -2.562390393 | 0.125983332 | 0.214704687 | AC004490.1   |
| ENSG00000283297 | 11.74378004 | 4.983245442 | 1.233265152  | 0.126091682 | 0.214875246 | TEX52        |
| ENSG00000254999 | 3085.558946 | 4184.028114 | -0.43929312  | 0.126100017 | 0.214875354 | BRK1         |
| ENSG00000118418 | 1238.031479 | 914.3767136 | 0.436854542  | 0.126113612 | 0.214884428 | HMG3         |
| ENSG00000261744 | 0.601596751 | 3.557089392 | -2.561139935 | 0.126162681 | 0.214953939 | AC116552.1   |
| ENSG00000122786 | 5779.979851 | 8917.375745 | -0.625589356 | 0.126231424 | 0.215056451 | CALD1        |
| ENSG00000123349 | 4118.788919 | 3266.978818 | 0.33429034   | 0.126239403 | 0.215056451 | PFDN5        |
| ENSG00000233061 | 3.881438055 | 0           | 4.2912844    | 0.126298885 | 0.215143675 | TTLL7-IT1    |
| ENSG00000107796 | 883.8739801 | 467.2906154 | 0.919068741  | 0.126374256 | 0.215257953 | ACTA2        |
| ENSG00000152620 | 644.5932737 | 489.889483  | 0.395942344  | 0.126466115 | 0.215400297 | NADK2        |
| ENSG00000288055 | 2.432856171 | 0           | 3.61565042   | 0.126496855 | 1           | AC107373.3   |
| ENSG00000233828 | 3.345316124 | 0.387220594 | 3.11326134   | 0.126512004 | 0.215464332 | LINC01949    |
| ENSG0000026950  | 654.8595225 | 450.4503175 | 0.539997893  | 0.126523448 | 0.215469697 | BTN3A1       |
| ENSG00000120784 | 279.5553244 | 218.4876351 | 0.355312362  | 0.126696848 | 0.215750857 | ZFP30        |
| ENSG00000130684 | 126.2391432 | 77.11047394 | 0.713330316  | 0.126708161 | 0.215755979 | ZNF337       |
| ENSG00000229688 | 3.04831433  | 0.336469917 | 2.978424224  | 0.126740692 | 0.21579723  | CRPPA-AS1    |
| ENSG00000223849 | 6.268949058 | 1.080229524 | 2.54072695   | 0.126800556 | 0.215872228 | AL354893.1   |
| ENSG00000099797 | 1000.010078 | 1314.160674 | -0.393999761 | 0.126801358 | 0.215872228 | TECR         |
| ENSG00000199805 | 0           | 3.505182839 | -4.392864999 | 0.126845184 | 0.215932691 | RNU1-134P    |
| ENSG00000225470 | 86.94666488 | 60.71592513 | 0.520637231  | 0.126867297 | 0.215956185 | JPX          |
| ENSG00000188779 | 33.91195604 | 13.9295857  | 1.289391314  | 0.126882313 | 0.215967595 | SKOR1        |
| ENSG00000286735 | 0.586481695 | 3.953766596 | -2.728888731 | 0.127062304 | 0.216259791 | AC126182.3   |
| ENSG00000256720 | 3.345316124 | 0.356539013 | 3.113264788  | 0.127080254 | 0.216262008 | BTG1P1       |
| ENSG00000114786 | 3.345316124 | 0.356539013 | 3.113264788  | 0.127080254 | 0.216262008 | ABHD14A-ACY1 |
| ENSG00000279133 | 21.74831592 | 12.08681174 | 0.843083045  | 0.127093701 | 0.216270725 | AC018628.1   |
| ENSG00000249115 | 325.5147303 | 471.452334  | -0.534397411 | 0.127122893 | 0.216292706 | HAUS5        |
| ENSG00000177182 | 3.944405577 | 0.723690511 | 2.453441691  | 0.127123268 | 0.216292706 | CLVS1        |
| ENSG00000189184 | 458.4094252 | 1260.540285 | -1.459469728 | 0.127215732 | 0.216435854 | PCDH18       |
| ENSG00000228290 | 12.8880517  | 3.892403433 | 1.719641327  | 0.127263702 | 0.21650329  | TBX18-AS1    |
| ENSG00000138400 | 27.0205964  | 13.95325081 | 0.952021659  | 0.12733763  | 0.216614874 | MDH1B        |
| ENSG00000205863 | 2.418994764 | 0           | 3.608347268  | 0.127371083 | 1           | C1QTNF9B     |
| ENSG00000286110 | 2.418994764 | 0           | 3.608347268  | 0.127371083 | 1           | AC090983.2   |
| ENSG00000237883 | 35.14566439 | 19.02738513 | 0.886720104  | 0.127375506 | 0.216665119 | DGUK-AS1     |

|                 |             |             |              |             |             |            |
|-----------------|-------------|-------------|--------------|-------------|-------------|------------|
| ENSG00000236206 | 2.417741115 | 0           | 3.607689138  | 0.127453802 | 1           | AL356441.1 |
| ENSG00000186842 | 2.417741115 | 0           | 3.607689138  | 0.127453802 | 1           | LINC00846  |
| ENSG00000183785 | 3.020591515 | 0.356539013 | 2.967294393  | 0.127493867 | 0.216842089 | TUBA8      |
| ENSG00000104419 | 11223.05529 | 6526.000246 | 0.782230564  | 0.127496238 | 0.216842089 | NDRG1      |
| ENSG00000253227 | 0.293240848 | 2.985650913 | -3.188630933 | 0.127521087 | 0.216870156 | AC090192.2 |
| ENSG00000285492 | 3.018084217 | 0.356539013 | 2.966293877  | 0.127601685 | 0.216993021 | AL356417.3 |
| ENSG00000141698 | 742.0703975 | 971.8851749 | -0.389135863 | 0.127641637 | 0.217046756 | NT5C3B     |
| ENSG00000267655 | 18.24300243 | 5.564140531 | 1.704724231  | 0.127677807 | 0.217094051 | AC125437.1 |
| ENSG00000233064 | 4.133094681 | 0           | 4.382508018  | 0.127713191 | 0.217140005 | AL136307.1 |
| ENSG00000246067 | 212.8027032 | 143.4511793 | 0.569061753  | 0.127772118 | 0.217225978 | RAB30-DT   |
| ENSG00000283491 | 3.28360225  | 8.998375202 | -1.445874923 | 0.127818558 | 0.217290712 | AC017104.5 |
| ENSG00000211669 | 4.004865802 | 0           | 4.334346221  | 0.127874028 | 0.217370787 | IGLV3-10   |
| ENSG00000132932 | 28.54378465 | 62.06052053 | -1.121313482 | 0.127901426 | 0.217403137 | ATP8A2     |
| ENSG00000178750 | 6.939781575 | 1.447381022 | 2.267129948  | 0.128080479 | 0.217691957 | STX19      |
| ENSG00000095787 | 2640.444864 | 2140.985214 | 0.30254261   | 0.128088101 | 0.217691957 | WAC        |
| ENSG00000283538 | 9.144942989 | 20.19503589 | -1.14442839  | 0.128096965 | 0.217692782 | AC005972.3 |
| ENSG00000084463 | 2227.155328 | 1635.809808 | 0.445214062  | 0.128129273 | 0.217724309 | WBP11      |
| ENSG00000135749 | 539.0122551 | 372.0241659 | 0.535663024  | 0.128132277 | 0.217724309 | PCNX2      |
| ENSG00000261131 | 7.531349136 | 2.527610546 | 1.580893312  | 0.128235872 | 0.217881801 | AC012186.2 |
| ENSG00000213222 | 0.615458159 | 3.557089392 | -2.546845716 | 0.128241735 | 0.217881801 | AC093724.1 |
| ENSG00000230397 | 5.701343365 | 12.89077864 | -1.173467505 | 0.128273344 | 0.217921255 | SPTLC1P1   |
| ENSG00000258983 | 4.777529303 | 0.713078025 | 2.740425204  | 0.128293248 | 0.217934665 | AL162171.3 |
| ENSG00000185513 | 133.7197765 | 79.81181828 | 0.745771895  | 0.12830562  | 0.217934665 | L3MBTL1    |
| ENSG00000134152 | 799.8159937 | 619.0308724 | 0.36981203   | 0.128306402 | 0.217934665 | KATNBL1    |
| novel.412       | 10.90313443 | 24.63770001 | -1.18134919  | 0.128321724 | 0.217940442 | -          |
| ENSG00000259881 | 3.047060681 | 0.387220594 | 2.977942477  | 0.128334969 | 0.217940442 | AC092384.2 |
| ENSG00000174469 | 3.047060681 | 0.387220594 | 2.977942477  | 0.128334969 | 0.217940442 | CNTNAP2    |
| ENSG00000175115 | 1270.814519 | 1540.848063 | -0.278033111 | 0.128503785 | 0.218212865 | PACS1      |
| ENSG00000174136 | 387.592595  | 578.0409792 | -0.576282161 | 0.128548274 | 0.218274146 | RGMB       |
| ENSG00000137699 | 6.773800692 | 0.672939833 | 3.294353728  | 0.128621296 | 0.218383864 | TRIM29     |
| ENSG00000284431 | 0.308355904 | 2.822786395 | -3.120907442 | 0.128644763 | 0.218409435 | AL022238.4 |
| ENSG00000105289 | 9.826844882 | 2.486316478 | 1.979751335  | 0.128680019 | 0.218455017 | TJP3       |
| ENSG00000285667 | 12.10758158 | 2.691759334 | 2.146027431  | 0.128696371 | 0.218468502 | AC012291.2 |
| ENSG00000286771 | 4.499403511 | 0.713078025 | 2.653145333  | 0.128728819 | 0.218509306 | AC097658.3 |
| ENSG00000165671 | 1321.602127 | 1634.667499 | -0.30675779  | 0.128781222 | 0.218583976 | NSD1       |
| ENSG00000254694 | 6.552089444 | 1.406086955 | 2.209712084  | 0.128847374 | 0.218681971 | AP001893.1 |
| ENSG00000005075 | 565.0358116 | 700.6774676 | -0.31079668  | 0.128866889 | 0.218700807 | POLR2J     |
| ENSG00000112977 | 2471.742242 | 3010.291947 | -0.284325242 | 0.128875729 | 0.218701522 | DAP        |
| ENSG00000081019 | 418.633797  | 301.7445917 | 0.473241478  | 0.128944484 | 0.218803909 | RSBN1      |
| ENSG00000126756 | 464.8190579 | 617.1881928 | -0.409274152 | 0.128965855 | 0.21882588  | UXT        |
| ENSG00000230536 | 0.293240848 | 2.822786395 | -3.120896309 | 0.129005004 | 0.218863721 | AL360268.1 |
| ENSG00000243339 | 0.293240848 | 2.822786395 | -3.120896309 | 0.129005004 | 0.218863721 | RN7SL738P  |
| ENSG00000236797 | 4.412474121 | 0           | 4.476889545  | 0.129042968 | 0.218913833 | SPA17P1    |
| ENSG00000112874 | 406.1506885 | 280.5639052 | 0.533227158  | 0.129134949 | 0.219046743 | NUDT12     |
| ENSG00000136925 | 253.5764574 | 177.5619775 | 0.513840462  | 0.129138176 | 0.219046743 | TSTD2      |
| ENSG00000154620 | 13.82161022 | 2.395427609 | 2.514504082  | 0.129170016 | 0.219086446 | TMSB4Y     |
| ENSG00000243094 | 3.872591243 | 0           | 4.288131591  | 0.129226134 | 0.21916732  | AC079203.1 |
| ENSG00000217930 | 2.137108026 | 7.265274941 | -1.766914117 | 0.129241552 | 0.219179163 | PAM16      |
| ENSG00000180739 | 16.10360057 | 6.378719912 | 1.329971742  | 0.129307935 | 0.2192733   | S1PR5      |
| ENSG00000277692 | 4.235139127 | 0.672939833 | 2.602008167  | 0.129313941 | 0.2192733   | AL121583.1 |
| ENSG00000260081 | 34.99640822 | 17.80680032 | 0.966326853  | 0.129408758 | 0.219404929 | AF274858.1 |

|                 |             |             |              |             |             |               |
|-----------------|-------------|-------------|--------------|-------------|-------------|---------------|
| novel.373       | 6.564697203 | 1.396630344 | 2.219126885  | 0.129409569 | 0.219404929 | -             |
| ENSG00000133318 | 2379.812634 | 1852.651147 | 0.361073509  | 0.129416902 | 0.219404929 | RTN3          |
| ENSG00000274810 | 3.047060681 | 0.336469917 | 2.977954216  | 0.129430366 | 0.219413438 | NPHP3-ACAD11  |
| ENSG00000197993 | 4.875812803 | 0.774441189 | 2.707309761  | 0.129487347 | 0.219495711 | KEL           |
| ENSG00000110700 | 6285.866628 | 8066.94264  | -0.359923906 | 0.129527863 | 0.219550065 | RPS13         |
| ENSG00000125970 | 2740.655024 | 3352.657263 | -0.29084629  | 0.129649667 | 0.219742188 | RALY          |
| ENSG00000167889 | 14.05070117 | 32.62751737 | -1.210734893 | 0.129682502 | 0.219783502 | MGAT5B        |
| ENSG00000215417 | 36.54800346 | 56.43185318 | -0.628587534 | 0.129750942 | 0.219885149 | MIR17HG       |
| ENSG00000234456 | 1471.054853 | 1025.586041 | 0.520169943  | 0.129819125 | 0.219986348 | MAGI2-AS3     |
| ENSG00000250365 | 20.72245742 | 9.835463823 | 1.067975187  | 0.129887432 | 0.220087744 | AL139353.2    |
| ENSG00000047056 | 455.0916514 | 561.4142059 | -0.302909713 | 0.129978844 | 0.220228273 | WDR37         |
| ENSG00000286292 | 8.033408738 | 2.149846562 | 1.903335206  | 0.130053657 | 0.220340662 | AC099343.4    |
| ENSG00000183291 | 2156.078359 | 2849.244363 | -0.402246001 | 0.130162129 | 0.220510059 | SELENOF       |
| ENSG00000197296 | 208.1057204 | 265.1545874 | -0.349389289 | 0.130197866 | 0.220556221 | FITM2         |
| ENSG00000225920 | 12.27614103 | 4.340987191 | 1.505096689  | 0.130277457 | 0.220676661 | RIMKLBP2      |
| ENSG00000181826 | 393.477154  | 274.5876762 | 0.519646281  | 0.130322775 | 0.220739033 | RELL1         |
| ENSG00000231768 | 7.351435574 | 1.793307549 | 2.032676433  | 0.130458575 | 0.220954643 | LINC01354     |
| ENSG00000247151 | 2.127007565 | 7.000780673 | -1.713293778 | 0.130512228 | 0.221031105 | CSTF3-DT      |
| ENSG00000140543 | 57.67047603 | 34.70068357 | 0.73583499   | 0.130535752 | 0.221056536 | DET1          |
| ENSG00000286443 | 5.7731577   | 1.406086955 | 2.02169038   | 0.130550954 | 0.22106787  | AC091178.2    |
| ENSG00000235554 | 7.624546771 | 2.058957692 | 1.861045334  | 0.130593822 | 0.221126049 | AC005822.1    |
| novel.64        | 8.487900608 | 16.23412444 | -0.934224493 | 0.130604301 | 0.221129381 | -             |
| ENSG00000234377 | 4.880827398 | 1.049547942 | 2.195473458  | 0.130639248 | 0.221174137 | RNF219-AS1    |
| ENSG00000167978 | 8034.055126 | 10917.0969  | -0.44236649  | 0.130668581 | 0.221209383 | SRRM2         |
| ENSG00000266149 | 5.163967785 | 1.029478846 | 2.293569101  | 0.130713591 | 0.221264444 | AP001094.3    |
| ENSG00000167283 | 676.0447926 | 491.7308574 | 0.459218518  | 0.130724519 | 0.221264444 | ATP5MG        |
| ENSG00000139323 | 383.9139053 | 294.7111688 | 0.382128057  | 0.130726655 | 0.221264444 | POC1B         |
| ENSG00000279019 | 21.99718052 | 8.244003109 | 1.417278212  | 0.1307794   | 0.221339299 | AC009090.4    |
| ENSG00000233110 | 14.26105831 | 6.288986917 | 1.166996131  | 0.13079864  | 0.221357443 | AC093797.1    |
| ENSG00000234233 | 0           | 3.424906455 | -4.361432787 | 0.130818609 | 0.221376817 | KCNH1-IT1     |
| ENSG00000209482 | 6.271456355 | 15.21525808 | -1.271377799 | 0.130868065 | 0.221446086 | SNORD83A      |
| ENSG00000068137 | 519.5658294 | 711.1976056 | -0.453245731 | 0.130877761 | 0.221448069 | PLEKHH3       |
| ENSG00000276434 | 3.00422281  | 0.356539013 | 2.960675522  | 0.13088947  | 0.221453459 | AL136221.1    |
| novel.914       | 17.82808568 | 4.401194479 | 2.022483911  | 0.130900166 | 0.221457134 | -             |
| ENSG00000118200 | 1351.462122 | 1039.539254 | 0.378697073  | 0.130924471 | 0.221483832 | CAMSAP2       |
| novel.1105      | 1.466204238 | 8.193124037 | -2.464997228 | 0.13093392  | 0.221485395 | -             |
| ENSG00000273124 | 2.431602522 | 0           | 3.615012665  | 0.130936457 | 1           | AL365434.2    |
| ENSG00000260704 | 2.431602522 | 0           | 3.615012665  | 0.130936457 | 1           | LINC00543     |
| ENSG00000205693 | 2.431602522 | 0           | 3.615012665  | 0.130936457 | 1           | MANSC4        |
| ENSG00000265566 | 2.431602522 | 0           | 3.615012665  | 0.130936457 | 1           | RN7SL605P     |
| ENSG00000224216 | 2.431602522 | 0           | 3.615012665  | 0.130936457 | 1           | AC234781.1    |
| ENSG00000239650 | 2.431602522 | 0           | 3.615012665  | 0.130936457 | 1           | GUSBP4        |
| ENSG00000135747 | 0           | 2.42610919  | -3.865460494 | 0.130951844 | 1           | ZNF670-ZNF695 |
| ENSG00000267523 | 21.62488818 | 39.23534525 | -0.856915712 | 0.130962268 | 0.221518925 | AC008735.2    |
| ENSG00000173039 | 1448.305067 | 1891.370506 | -0.384877852 | 0.131196266 | 0.221900279 | RELA          |
| ENSG00000165782 | 739.848925  | 559.8334864 | 0.402662555  | 0.13122539  | 0.22193509  | PIP4P1        |
| ENSG00000118412 | 464.4188022 | 368.7332059 | 0.332751592  | 0.131252168 | 0.22196593  | CASP8AP2      |
| ENSG00000261183 | 6.751163743 | 1.00940975  | 2.70483142   | 0.131347278 | 0.22208977  | SPINT1-AS1    |
| ENSG00000232186 | 29.15992699 | 9.465743786 | 1.633490194  | 0.131348387 | 0.22208977  | AL137013.1    |
| ENSG00000122958 | 1113.507291 | 1400.852836 | -0.331398203 | 0.131351041 | 0.22208977  | VPS26A        |
| ENSG00000233476 | 1105.596483 | 1466.972958 | -0.408071492 | 0.131449323 | 0.222241483 | EEF1A1P6      |

|                 |             |             |              |             |             |              |
|-----------------|-------------|-------------|--------------|-------------|-------------|--------------|
| ENSG00000287249 | 4.621577609 | 0.356539013 | 3.578777961  | 0.131479322 | 0.222277738 | AC005400.1   |
| ENSG00000100600 | 731.6252565 | 1013.162024 | -0.46984352  | 0.131527635 | 0.222344947 | LGMN         |
| ENSG00000206145 | 0.307102255 | 2.893606169 | -3.15069796  | 0.131653641 | 0.222543478 | P2RX6P       |
| ENSG00000265437 | 0.923814062 | 4.351599676 | -2.244943186 | 0.131669252 | 0.222555387 | AP005212.1   |
| ENSG00000232807 | 48.09550124 | 32.34667842 | 0.573203206  | 0.131731148 | 0.222631752 | AL137186.2   |
| ENSG00000133773 | 457.7316458 | 577.3785835 | -0.33529043  | 0.13173157  | 0.222631752 | CCDC59       |
| ENSG00000075035 | 4.621577609 | 0.336469917 | 3.578781093  | 0.131786331 | 0.222709813 | WSCD2        |
| ENSG00000128254 | 8.791241917 | 2.772035718 | 1.644779694  | 0.131850958 | 0.222804536 | C22orf24     |
| ENSG00000258947 | 15.96004317 | 31.18989693 | -0.969330091 | 0.13189043  | 0.222856742 | TUBB3        |
| ENSG00000276805 | 71.34978251 | 39.87187131 | 0.837497718  | 0.132019866 | 0.223060944 | AL133216.2   |
| ENSG00000227008 | 24.28948479 | 41.21860288 | -0.760353285 | 0.132057474 | 0.223109977 | AL009174.1   |
| ENSG00000118276 | 135.2445306 | 200.0311277 | -0.56461783  | 0.132094313 | 0.223157706 | B4GALT6      |
| ENSG00000143183 | 1133.752389 | 1523.829762 | -0.426782557 | 0.132157932 | 0.223250665 | TMCO1        |
| ENSG00000112514 | 191.2869976 | 454.4272289 | -1.248156296 | 0.132324123 | 0.223516874 | CUTA         |
| ENSG00000010361 | 361.3117662 | 284.6210997 | 0.344365856  | 0.132336449 | 0.223523162 | FUZ          |
| ENSG00000272699 | 4.515772216 | 0.774441189 | 2.601751962  | 0.132373842 | 0.223571786 | AC007620.3   |
| ENSG00000265735 | 2.743719372 | 9.527363738 | -1.802087009 | 0.132446591 | 0.223680114 | RN7SL5P      |
| novel.734       | 48.42552553 | 97.07709134 | -1.002076991 | 0.132476612 | 0.223716272 | -            |
| ENSG00000196154 | 977.0074513 | 577.2802208 | 0.759433689  | 0.132501241 | 0.223743322 | S100A4       |
| ENSG00000169371 | 237.4684113 | 295.7047475 | -0.316700329 | 0.132540578 | 0.223781307 | SNUPN        |
| ENSG00000259994 | 46.27405755 | 26.56789521 | 0.797907568  | 0.132540963 | 0.223781307 | AL353796.1   |
| ENSG00000138286 | 539.4971481 | 419.6164929 | 0.363036094  | 0.132726762 | 0.224080448 | FAM149B1     |
| ENSG00000273248 | 4.554849141 | 1.080229524 | 2.077901873  | 0.132756209 | 0.224115599 | AC010997.5   |
| ENSG00000099812 | 0.308355904 | 3.861721852 | -3.571649337 | 0.132808309 | 0.224188985 | MISP         |
| novel.217       | 2.403879708 | 0           | 3.600317746  | 0.132820852 | 1           | -            |
| ENSG00000224430 | 2.403879708 | 0           | 3.600317746  | 0.132820852 | 1           | MKRN5P       |
| ENSG00000258569 | 2.403879708 | 0           | 3.600317746  | 0.132820852 | 1           | AC007376.2   |
| ENSG00000259262 | 2.403879708 | 0           | 3.600317746  | 0.132820852 | 1           | NDUFA3P4     |
| ENSG00000236202 | 2.403879708 | 0           | 3.600317746  | 0.132820852 | 1           | GRM7-AS1     |
| novel.975       | 27.67137054 | 55.7427786  | -1.007892522 | 0.13283329  | 0.224216588 | -            |
| ENSG00000163960 | 871.5946959 | 1204.94688  | -0.466959334 | 0.132865333 | 0.224256104 | UBXN7        |
| ENSG00000266420 | 0           | 3.751919761 | -4.492549804 | 0.13302752  | 0.224515266 | RN7SL118P    |
| ENSG00000117983 | 9.083229116 | 3.302051734 | 1.47317478   | 0.133149112 | 0.224702663 | MUC5B        |
| ENSG00000261377 | 8.802596027 | 18.55988815 | -1.078351891 | 0.133155853 | 0.224702663 | PDCD6IP2     |
| ENSG00000226029 | 46.23630554 | 25.88293023 | 0.842057484  | 0.133286457 | 0.224908452 | LINC01772    |
| ENSG00000132429 | 418.6145219 | 262.6773296 | 0.673221303  | 0.133305361 | 0.224925743 | POPDC3       |
| ENSG00000186073 | 160.7986815 | 226.686153  | -0.495979648 | 0.133336006 | 0.224962841 | C15orf41     |
| ENSG00000077616 | 9.88354416  | 3.577158488 | 1.466888533  | 0.133367291 | 0.224998327 | NAALAD2      |
| ENSG00000183166 | 4.308207111 | 0.387220594 | 3.477394624  | 0.13337436  | 0.224998327 | CALN1        |
| ENSG00000245017 | 5.789526405 | 1.396630344 | 2.031810615  | 0.133519836 | 0.225206512 | LINC02453    |
| ENSG00000034713 | 1769.694459 | 1306.58857  | 0.437782336  | 0.133521455 | 0.225206512 | GABARAPL2    |
| ENSG00000232671 | 4.262861942 | 10.10928631 | -1.246846597 | 0.133523772 | 0.225206512 | ZNF687-AS1   |
| ENSG00000269887 | 1.203193503 | 5.54522731  | -2.20826867  | 0.133552521 | 0.225232188 | AL391001.1   |
| ENSG00000247595 | 35.48690025 | 17.96966484 | 0.977720735  | 0.133556333 | 0.225232188 | SPTY2D1OS    |
| ENSG00000156427 | 6.026067974 | 1.753169357 | 1.766004896  | 0.133586803 | 0.225268951 | FGF18        |
| ENSG00000280693 | 5.759296292 | 1.456837632 | 1.992192677  | 0.133670846 | 0.225380225 | SH3PXD2A-AS1 |
| ENSG00000226432 | 6.079006306 | 1.753169357 | 1.776388436  | 0.133677321 | 0.225380225 | AC010342.1   |
| ENSG00000262228 | 2.095523804 | 6.512058724 | -1.625919429 | 0.133678814 | 0.225380225 | AC087392.3   |
| ENSG00000178796 | 5.785765458 | 1.069617038 | 2.42926277   | 0.133788862 | 0.225551127 | RIIAD1       |
| ENSG00000166889 | 709.4422119 | 933.9255528 | -0.396271889 | 0.133807378 | 0.225561035 | PATL1        |
| ENSG00000152229 | 206.1235948 | 271.3121149 | -0.395978564 | 0.133812102 | 0.225561035 | PSTPIP2      |

|                 |             |             |              |             |             |            |
|-----------------|-------------|-------------|--------------|-------------|-------------|------------|
| ENSG00000227527 | 8.793749215 | 3.311508345 | 1.423868551  | 0.133835756 | 0.22558627  | AC096540.1 |
| ENSG00000231205 | 99.82447358 | 47.53536451 | 1.067353414  | 0.133862078 | 0.225616001 | ZNF826P    |
| ENSG00000144645 | 151.2044313 | 280.5022977 | -0.89236396  | 0.133879567 | 0.22562101  | OSBPL10    |
| ENSG00000197582 | 183.9048455 | 138.7948187 | 0.405570371  | 0.133882418 | 0.22562101  | GPX1P1     |
| ENSG00000125877 | 888.4573398 | 1108.007931 | -0.318729404 | 0.133899712 | 0.225635518 | ITPA       |
| ENSG00000261101 | 11.84582449 | 5.370466037 | 1.138684013  | 0.133953778 | 0.225711986 | AC234775.3 |
| ENSG00000270589 | 13.20622334 | 5.379922647 | 1.296647715  | 0.133969656 | 0.225724101 | AL158163.1 |
| ENSG00000279382 | 49.80555548 | 25.29411959 | 0.973992067  | 0.134015153 | 0.225786116 | AC018665.1 |
| ENSG00000179922 | 106.0405556 | 150.5509399 | -0.505428908 | 0.134041984 | 0.225810587 | ZNF784     |
| ENSG00000168813 | 605.1575539 | 470.4994412 | 0.362969765  | 0.134047972 | 0.225810587 | ZNF507     |
| ENSG00000166128 | 1307.151325 | 970.555614  | 0.429789157  | 0.134055752 | 0.225810587 | RAB8B      |
| ENSG00000203993 | 430.4394766 | 534.2361127 | -0.311788774 | 0.134084673 | 0.22584466  | ARRDC1-AS1 |
| ENSG00000175073 | 550.8750738 | 428.5852952 | 0.362543755  | 0.134122512 | 0.22589375  | VCPIP1     |
| ENSG00000100191 | 7.180155362 | 1.834601616 | 1.983825082  | 0.134193161 | 0.225998089 | SLC5A4     |
| ENSG00000210082 | 91692.773   | 60787.68161 | 0.593030306  | 0.134233386 | 0.22605118  | MT-RNR2    |
| ENSG00000280163 | 7.752775649 | 1.426156051 | 2.439917265  | 0.134260211 | 0.2260817   | AC040160.2 |
| ENSG00000253633 | 0.908699006 | 4.463713517 | -2.286865363 | 0.134270747 | 0.226084788 | AP002852.1 |
| ENSG00000286696 | 5.906401173 | 21.02022776 | -1.825903496 | 0.134337328 | 0.226182238 | AC090826.3 |
| ENSG00000224680 | 2.697120555 | 8.653732944 | -1.685253882 | 0.134356234 | 0.226199411 | PLA2G12AP1 |
| ENSG00000106258 | 88.78537492 | 62.76915063 | 0.498899886  | 0.134376255 | 0.22621254  | CYP3A5     |
| ENSG00000168569 | 272.6676548 | 361.1516717 | -0.406133457 | 0.134381446 | 0.22621254  | TMEM223    |
| ENSG00000278112 | 3.591958154 | 9.264025345 | -1.362990361 | 0.134400609 | 0.226230142 | AC145423.3 |
| ENSG00000272455 | 42.60089661 | 74.43181442 | -0.805491685 | 0.134429633 | 0.226264337 | AL391244.2 |
| ENSG00000158796 | 514.0430482 | 405.1125618 | 0.343619254  | 0.134514294 | 0.226392166 | DEDD       |
| ENSG00000228714 | 2.442956632 | 9.243956249 | -1.924780263 | 0.134542407 | 0.226424814 | AL691420.1 |
| ENSG00000074054 | 937.9799127 | 1215.09153  | -0.373268671 | 0.134551535 | 0.226425509 | CLASP1     |
| ENSG00000181619 | 54.4314635  | 79.84622428 | -0.554311231 | 0.134613669 | 0.226515397 | GPR135     |
| ENSG00000232415 | 13.04274975 | 5.595977988 | 1.206949385  | 0.134657922 | 0.226575188 | ELN-AS1    |
| ENSG00000286349 | 4.722083673 | 0.336469917 | 3.613494082  | 0.134703742 | 0.226637606 | AC108471.3 |
| ENSG00000169777 | 4.301867596 | 0           | 4.437861202  | 0.134772409 | 0.226723773 | TAS2R1     |
| ENSG00000196092 | 4.301867596 | 0           | 4.437861202  | 0.134772409 | 0.226723773 | PAX5       |
| ENSG00000166922 | 5.892539766 | 24.02800273 | -2.021041847 | 0.134806992 | 0.226756698 | SCG5       |
| ENSG00000105085 | 105.9048761 | 140.6870591 | -0.408492115 | 0.134809436 | 0.226756698 | MED26      |
| ENSG00000248121 | 15.26546225 | 28.95373782 | -0.926750492 | 0.134846422 | 0.226804227 | SMURF2P1   |
| ENSG00000107929 | 1223.738525 | 1520.327717 | -0.313054496 | 0.13486165  | 0.226815157 | LARP4B     |
| ENSG00000269352 | 71.93028069 | 44.11020127 | 0.702546569  | 0.135114317 | 0.227225392 | PTOV1-AS2  |
| ENSG00000271133 | 17.32831991 | 6.167416466 | 1.474541303  | 0.135146203 | 0.227264305 | AC004130.1 |
| ENSG00000113356 | 181.7411696 | 258.0107545 | -0.504908399 | 0.135208252 | 0.227353931 | POLR3G     |
| ENSG00000232732 | 1.230916317 | 5.868644597 | -2.258185175 | 0.135222064 | 0.227362441 | AC097717.1 |
| ENSG00000132879 | 589.8484987 | 398.9698726 | 0.564843987  | 0.135243278 | 0.227383395 | FBXO44     |
| ENSG00000197766 | 3.374292587 | 0.336469917 | 3.124332485  | 0.135269164 | 0.227412201 | CFD        |
| ENSG00000236213 | 5.541630725 | 0.743759607 | 2.91736529   | 0.13532996  | 0.227499689 | AC006369.1 |
| ENSG00000155657 | 276.4238142 | 179.9352342 | 0.620513717  | 0.135396195 | 0.227590711 | TTN        |
| ENSG00000121022 | 903.2984972 | 1108.390609 | -0.295387472 | 0.135402369 | 0.227590711 | COP55      |
| ENSG00000142621 | 15.89094959 | 5.12488499  | 1.637768552  | 0.135410385 | 0.227590711 | FHAD1      |
| ENSG00000110243 | 0           | 3.362259022 | -4.327074701 | 0.135434509 | 0.227616533 | APOA5      |
| ENSG00000125354 | 453.1028422 | 279.5038732 | 0.696611114  | 0.135504789 | 0.227719917 | SEPT6      |
| ENSG00000175536 | 26.59633464 | 15.04293695 | 0.82181118   | 0.135518758 | 0.227728662 | LIPT2      |
| ENSG00000177548 | 437.2326514 | 540.3324054 | -0.305548151 | 0.135528593 | 0.22773046  | RABEP2     |
| ENSG00000122692 | 1048.594462 | 1277.502884 | -0.284877087 | 0.135602205 | 0.227839416 | SMU1       |
| novel.534       | 8.59091397  | 22.37787579 | -1.375411    | 0.135702591 | 0.227993341 | -          |



|                 |             |             |              |             |             |              |
|-----------------|-------------|-------------|--------------|-------------|-------------|--------------|
| ENSG00000278224 | 4.906042916 | 0.672939833 | 2.819472867  | 0.135766772 | 0.228086422 | PRICKLE4     |
| ENSG00000132604 | 441.0932047 | 544.2871995 | -0.303368481 | 0.135833026 | 0.228180559 | TERF2        |
| novel.592       | 11.89367696 | 4.758889366 | 1.330000405  | 0.135840372 | 0.228180559 | -            |
| ENSG00000122203 | 2009.537652 | 2615.192526 | -0.379910588 | 0.135858936 | 0.228196988 | KIAA1191     |
| ENSG00000269226 | 5.703850663 | 13.21663607 | -1.210054592 | 0.135871739 | 0.228203739 | TMSB15B      |
| ENSG00000084731 | 1467.572455 | 955.4499359 | 0.61940166   | 0.135882199 | 0.228206555 | KIF3C        |
| ENSG00000117713 | 1305.783693 | 1679.308475 | -0.362797863 | 0.135922455 | 0.228259408 | ARID1A       |
| ENSG00000251562 | 8168.582315 | 5254.383567 | 0.636577399  | 0.135980612 | 0.228342313 | MALAT1       |
| ENSG00000243989 | 6.972590256 | 14.44081689 | -1.049005616 | 0.136035009 | 0.228418896 | ACY1         |
| ENSG00000213593 | 1288.332767 | 1668.036436 | -0.372833148 | 0.1360543   | 0.228436524 | TMX2         |
| ENSG00000127585 | 21.02225124 | 45.4744334  | -1.111526207 | 0.136130605 | 0.22854987  | FBXL16       |
| ENSG00000287937 | 0.308355904 | 3.983292303 | -3.61252748  | 0.1361506   | 0.22856867  | AC079753.2   |
| novel.720       | 1.186824798 | 9.649833275 | -3.012170456 | 0.136203656 | 0.228642967 | -            |
| ENSG00000148187 | 419.4190404 | 533.2095876 | -0.346576921 | 0.136236095 | 0.228682645 | MRRF         |
| ENSG00000286780 | 2.758834428 | 0           | 3.796275347  | 0.136258346 | 0.22870312  | AL139379.1   |
| ENSG00000197181 | 51.0646928  | 22.35451464 | 1.185154737  | 0.136265898 | 0.22870312  | PIWIL2       |
| ENSG00000152102 | 2461.833895 | 3010.234105 | -0.290156823 | 0.136279004 | 0.228710341 | FAM168B      |
| ENSG00000161558 | 129.07294   | 181.101999  | -0.488467463 | 0.136306396 | 0.228732601 | TMEM143      |
| ENSG00000169180 | 2325.423162 | 3097.669575 | -0.413647281 | 0.136309875 | 0.228732601 | XPO6         |
| ENSG00000123607 | 379.4945931 | 478.7253358 | -0.334964279 | 0.136354911 | 0.228793396 | TTC21B       |
| ENSG00000279357 | 4.486795753 | 0.672939833 | 2.691149236  | 0.13637162  | 0.228806656 | AC007224.2   |
| novel.890       | 0           | 3.392940604 | -4.339442878 | 0.136422982 | 0.228835218 | -            |
| ENSG00000287229 | 0           | 3.392940604 | -4.339442878 | 0.136422982 | 0.228835218 | AC009731.1   |
| ENSG00000125798 | 0           | 3.392940604 | -4.339442878 | 0.136422982 | 0.228835218 | FOXA2        |
| ENSG00000145850 | 6.564697203 | 1.161661783 | 2.541817266  | 0.136423875 | 0.228835218 | TIMD4        |
| ENSG00000284747 | 6.065144898 | 15.59443472 | -1.369235994 | 0.136452552 | 0.228868544 | AL034417.4   |
| ENSG00000183770 | 7.965711355 | 2.089639274 | 1.912688314  | 0.136478207 | 0.228896797 | FOXL2        |
| ENSG00000148143 | 391.3424701 | 261.0903636 | 0.584741977  | 0.136560605 | 0.22902021  | ZNF462       |
| ENSG00000160867 | 64.32023572 | 35.44315891 | 0.862390048  | 0.136611885 | 0.22909142  | FGFR4        |
| ENSG00000119953 | 539.9636342 | 666.0895405 | -0.30274234  | 0.136674347 | 0.229181374 | SMNDC1       |
| novel.798       | 54.82627878 | 163.239216  | -1.574642902 | 0.136788444 | 0.229357893 | -            |
| ENSG00000278416 | 5.14759908  | 12.28164211 | -1.260680025 | 0.136852665 | 0.229450768 | PMS2P2       |
| ENSG00000136754 | 1057.318676 | 874.7094888 | 0.273406223  | 0.136900824 | 0.2295167   | ABI1         |
| ENSG00000109103 | 435.2736461 | 678.782137  | -0.640948343 | 0.136969351 | 0.229616771 | UNC119       |
| ENSG00000254595 | 32.25838762 | 13.30636906 | 1.278775211  | 0.137270497 | 0.230106767 | AC084337.1   |
| ENSG00000251102 | 7.584216197 | 16.48916209 | -1.121548561 | 0.137315976 | 0.230156054 | CTBP2P4      |
| ENSG00000111801 | 635.543422  | 456.5554717 | 0.477311544  | 0.137317616 | 0.230156054 | BTN3A3       |
| ENSG00000247679 | 84.90526179 | 60.37829934 | 0.494472932  | 0.137364972 | 0.230208315 | AC139795.2   |
| ENSG00000267092 | 0.307102255 | 2.782648203 | -3.103366128 | 0.137366518 | 0.230208315 | AC027307.1   |
| ENSG00000226386 | 9.494811844 | 2.231278821 | 2.102969806  | 0.137386488 | 0.230226932 | PARD3-AS1    |
| ENSG00000124177 | 1238.704464 | 893.9884523 | 0.470781294  | 0.137547291 | 0.230479088 | CHD6         |
| ENSG00000245149 | 50.55962771 | 31.50013319 | 0.686439524  | 0.137567886 | 0.230479088 | RNF139-AS1   |
| ENSG00000056998 | 213.9351348 | 124.1195    | 0.78644284   | 0.137575068 | 0.230479088 | GYG2         |
| ENSG00000134287 | 2413.43723  | 3046.028281 | -0.335835473 | 0.137575566 | 0.230479088 | ARF3         |
| ENSG00000238164 | 3.692748952 | 0           | 4.212768639  | 0.137599058 | 0.230479088 | TNFRSF14-AS1 |
| ENSG00000262681 | 3.692748952 | 0           | 4.212768639  | 0.137599058 | 0.230479088 | AC005722.2   |
| ENSG00000215785 | 3.692748952 | 0           | 4.212768639  | 0.137599058 | 0.230479088 | CFL1P6       |
| ENSG00000188818 | 46.24446817 | 24.46062699 | 0.912200107  | 0.137610599 | 0.230483559 | ZDHHC11      |
| ENSG00000155066 | 41.75201709 | 19.75911958 | 1.087525624  | 0.137626671 | 0.23049562  | PROM2        |
| ENSG00000273123 | 3.899060409 | 0.743759607 | 2.422118611  | 0.137707486 | 0.230616102 | AC020634.1   |
| ENSG00000112685 | 601.7972768 | 804.4277187 | -0.418594884 | 0.137813664 | 0.23077904  | EXOC2        |

|                 |             |             |              |             |             |             |
|-----------------|-------------|-------------|--------------|-------------|-------------|-------------|
| ENSG00000279778 | 6.938599197 | 0.774441189 | 3.202623115  | 0.13782627  | 0.230785275 | AL445437.1  |
| ENSG00000264548 | 3.576843098 | 9.731522323 | -1.435378418 | 0.137904683 | 0.230888969 | AC132872.2  |
| ENSG00000188559 | 239.9452881 | 318.8350219 | -0.40927715  | 0.137905971 | 0.230888969 | RALGAPA2    |
| novel.715       | 14.38441478 | 3.92424089  | 1.871459737  | 0.13797793  | 0.230982356 | -           |
| ENSG00000166313 | 1194.370121 | 894.2860818 | 0.417820719  | 0.13797953  | 0.230982356 | APBB1       |
| ENSG00000081087 | 1040.919284 | 795.1261358 | 0.388206049  | 0.138045388 | 0.231077715 | OSTM1       |
| ENSG00000003989 | 957.5056389 | 1742.017763 | -0.863518284 | 0.138110492 | 0.231171801 | SLC7A2      |
| ENSG00000267342 | 24.64924064 | 10.75282883 | 1.18753095   | 0.1381316   | 0.231192237 | AC087289.3  |
| ENSG00000141179 | 271.5426864 | 340.2109368 | -0.324974463 | 0.138140661 | 0.231192509 | PCTP        |
| ENSG00000123136 | 1371.935773 | 1844.899476 | -0.427382008 | 0.138198924 | 0.23127512  | DDX39A      |
| ENSG00000231258 | 3.694002601 | 0           | 4.217738546  | 0.13823517  | 0.231303963 | ZSWIM5P2    |
| ENSG00000270792 | 3.694002601 | 0           | 4.217738546  | 0.13823517  | 0.231303963 | AL050403.2  |
| ENSG00000280193 | 13.40877385 | 4.411806964 | 1.614595165  | 0.138242867 | 0.231303963 | AC132219.2  |
| ENSG00000144455 | 795.4056257 | 614.7031606 | 0.371643547  | 0.138350231 | 0.23146663  | SUMF1       |
| ENSG00000226952 | 0.293240848 | 3.749479616 | -3.520470783 | 0.138357906 | 0.23146663  | AC093019.1  |
| ENSG00000248079 | 13.60777687 | 5.399991743 | 1.334508673  | 0.138378428 | 0.231486056 | DPH6-DT     |
| ENSG00000166444 | 910.7120176 | 615.5154842 | 0.565697805  | 0.138536896 | 0.231736229 | ST5         |
| ENSG00000166272 | 1559.377924 | 1243.248425 | 0.326813571  | 0.138562342 | 0.231754816 | WBP1L       |
| ENSG00000225506 | 1.200686205 | 5.554683921 | -2.212116182 | 0.138565849 | 0.231754816 | CYP4A22-AS1 |
| ENSG00000180422 | 9.94031471  | 2.180528143 | 2.193923311  | 0.138581039 | 0.231765303 | LINC00304   |
| ENSG00000287315 | 6.07524536  | 1.00940975  | 2.551140256  | 0.138598155 | 0.231779008 | AL670729.3  |
| ENSG00000245275 | 53.27096568 | 29.92082602 | 0.827774486  | 0.138620609 | 0.231801638 | SAP30L-AS1  |
| ENSG00000261512 | 59.12303233 | 88.64822805 | -0.581679113 | 0.138729836 | 0.231969357 | AC092368.3  |
| ENSG00000196209 | 91.33241293 | 29.14099096 | 1.651071924  | 0.138775138 | 0.232030174 | SIRPB2      |
| ENSG00000070476 | 719.3076508 | 503.8888138 | 0.513777133  | 0.138813844 | 0.232079954 | ZXDC        |
| ENSG00000124228 | 724.4129662 | 957.13285   | -0.401996827 | 0.138840418 | 0.232109445 | DDX27       |
| ENSG00000266598 | 4.998955816 | 0.356539013 | 3.695688128  | 0.138896332 | 0.232187981 | AC037487.2  |
| ENSG00000168454 | 7.823336335 | 2.200597239 | 1.842305442  | 0.138956119 | 0.23227298  | TXNDC2      |
| ENSG00000130287 | 4.907296564 | 0.713078025 | 2.775339225  | 0.139024189 | 0.232361179 | NCAN        |
| ENSG00000139112 | 1197.454289 | 1670.420946 | -0.480429149 | 0.13902677  | 0.232361179 | GABARAPL1   |
| ENSG00000241685 | 937.0846608 | 749.4804095 | 0.322216857  | 0.139053866 | 0.232391516 | ARPC1A      |
| ENSG00000050165 | 5136.76467  | 3048.056141 | 0.753047475  | 0.139071421 | 0.232405905 | DKK3        |
| ENSG00000267174 | 4.217516774 | 0.743759607 | 2.531789341  | 0.13911458  | 0.232460116 | AC011472.2  |
| ENSG00000247324 | 8.1845593   | 2.884149558 | 1.507368973  | 0.139121756 | 0.232460116 | AC010547.1  |
| ENSG00000277595 | 6.010952918 | 1.518200796 | 2.02245239   | 0.139141055 | 0.232472593 | AC007546.1  |
| ENSG00000271811 | 3.66251884  | 10.11057058 | -1.47561352  | 0.139153984 | 0.232472593 | Z97200.1    |
| ENSG00000145908 | 321.7735594 | 209.6915391 | 0.617483813  | 0.139156066 | 0.232472593 | ZNF300      |
| ENSG00000134769 | 574.5447276 | 329.2196593 | 0.804017811  | 0.13919362  | 0.232520378 | DTNA        |
| ENSG00000268573 | 9.321024334 | 17.86572334 | -0.936894864 | 0.139301554 | 0.232685719 | AC011815.1  |
| ENSG00000130775 | 498.843186  | 284.4869305 | 0.810852061  | 0.13932769  | 0.232714415 | THEMIS2     |
| ENSG00000224097 | 11.29333385 | 3.740023006 | 1.611377145  | 0.139460057 | 0.232910404 | AC021148.1  |
| ENSG00000125703 | 383.1378643 | 279.8393971 | 0.453547937  | 0.13946296  | 0.232910404 | ATG4C       |
| ENSG00000149527 | 8.933545666 | 1.365948763 | 2.687189619  | 0.139482638 | 0.232928296 | PLCH2       |
| ENSG00000265683 | 7.473396209 | 2.149846562 | 1.798557141  | 0.13955006  | 0.233025909 | SYPL1P2     |
| ENSG00000135828 | 322.3376299 | 206.0183543 | 0.644630805  | 0.139583316 | 0.233066461 | RNASEL      |
| ENSG00000273489 | 3.268487194 | 0.356539013 | 3.083836345  | 0.139670264 | 0.233196655 | AC008264.2  |
| ENSG00000170185 | 489.932935  | 396.8120287 | 0.304055773  | 0.139851113 | 0.233483598 | USP38       |
| ENSG00000073417 | 1446.493599 | 1018.291999 | 0.506365385  | 0.139888172 | 0.233530463 | PDE8A       |
| ENSG00000181350 | 54.85851729 | 27.05764464 | 1.019715115  | 0.139922552 | 0.233572849 | LRRRC75A    |
| ENSG00000197223 | 286.8403444 | 383.4257687 | -0.418682282 | 0.139933435 | 0.233576009 | C1D         |
| ENSG00000173614 | 198.3812756 | 282.6318528 | -0.511764881 | 0.139945704 | 0.233581481 | NMNAT1      |

|                 |             |             |              |             |             |             |
|-----------------|-------------|-------------|--------------|-------------|-------------|-------------|
| ENSG00000171202 | 337.8940826 | 458.2825955 | -0.440396565 | 0.139968888 | 0.233605169 | TMEM126A    |
| ENSG00000267692 | 3.269740843 | 0.336469917 | 3.084309516  | 0.140005734 | 0.233651656 | TAF9P3      |
| ENSG00000147573 | 2.158491326 | 16.84197669 | -2.96612067  | 0.140026537 | 0.233671364 | TRIM55      |
| ENSG00000196152 | 141.5042056 | 100.8061164 | 0.489489313  | 0.140147364 | 0.233857974 | ZNF79       |
| ENSG00000116266 | 972.3907773 | 799.7342677 | 0.281903808  | 0.140157831 | 0.233860421 | STXBP3      |
| ENSG00000196204 | 288.3608988 | 395.0944683 | -0.454279815 | 0.140177963 | 0.233878992 | RNF216P1    |
| novel.81        | 4.622831258 | 0.336469917 | 3.579231429  | 0.140193784 | 0.233890367 | -           |
| ENSG00000228065 | 2.76893489  | 11.67134971 | -2.084959556 | 0.140263505 | 0.233991661 | LINC01515   |
| ENSG00000060566 | 2.447971227 | 0           | 3.623732946  | 0.140272942 | 1           | CREB3L3     |
| ENSG00000244692 | 2.447971227 | 0           | 3.623732946  | 0.140272942 | 1           | RN7SL724P   |
| ENSG00000198961 | 3259.331653 | 2460.225176 | 0.405871653  | 0.140274206 | 0.233994488 | PJA2        |
| ENSG00000251396 | 14.55304551 | 25.42861428 | -0.81045455  | 0.140333202 | 0.234077871 | LINC01301   |
| ENSG00000171488 | 757.2094964 | 596.9024177 | 0.34364589   | 0.140352198 | 0.234094527 | LRR8C       |
| ENSG00000238217 | 2.446717578 | 0           | 3.623072572  | 0.140361289 | 1           | LINC01877   |
| ENSG00000231165 | 2.446717578 | 0           | 3.623072572  | 0.140361289 | 1           | TRBV26OR9-2 |
| ENSG00000279940 | 2.446717578 | 0           | 3.623072572  | 0.140361289 | 1           | AC073862.3  |
| ENSG00000176601 | 2.446717578 | 0           | 3.623072572  | 0.140361289 | 1           | MAP3K19     |
| ENSG00000285752 | 21.58581125 | 10.76215704 | 1.005963246  | 0.140450007 | 0.234242626 | AL031281.2  |
| ENSG00000165417 | 758.7721172 | 947.4710943 | -0.320354532 | 0.140516702 | 0.234338817 | GTF2A1      |
| ENSG00000215717 | 1132.161005 | 872.5512474 | 0.375847951  | 0.14053582  | 0.234351565 | TMEM167B    |
| ENSG00000271780 | 41.99922858 | 24.76615854 | 0.761294222  | 0.140542386 | 0.234351565 | AL118558.3  |
| ENSG00000104290 | 193.0106407 | 120.7629732 | 0.678600701  | 0.140615433 | 0.234458321 | FZD3        |
| ENSG00000261594 | 21.14317169 | 7.856654121 | 1.438413372  | 0.140661999 | 0.234520837 | TPBGL       |
| ENSG00000170946 | 391.9392219 | 316.7767534 | 0.307219887  | 0.140673277 | 0.234520837 | DNAJC24     |
| ENSG00000270108 | 32.83261756 | 18.66023363 | 0.816160435  | 0.140683417 | 0.234520837 | AL049840.5  |
| ENSG00000152409 | 574.6677708 | 379.8367819 | 0.598006534  | 0.140689033 | 0.234520837 | JMY         |
| ENSG00000269176 | 14.26865147 | 6.756483895 | 1.072665834  | 0.140708184 | 0.234537713 | AP001160.3  |
| ENSG00000224261 | 7.28094616  | 2.527610546 | 1.530177906  | 0.140732806 | 0.234563704 | RPSAP18     |
| ENSG00000198298 | 54.27279105 | 74.5867162  | -0.459472882 | 0.140777409 | 0.234622995 | ZNF485      |
| ENSG00000176842 | 18.73169882 | 44.1586402  | -1.240236297 | 0.140817116 | 0.234674118 | IRX5        |
| ENSG00000267530 | 27.05103998 | 9.040953539 | 1.573862321  | 0.140845218 | 0.234705894 | LINC01836   |
| ENSG00000206888 | 2.990361403 | 0.336469917 | 2.954874487  | 0.140892223 | 0.234769166 | RNU6-48P    |
| ENSG00000268364 | 16.84227301 | 6.960770875 | 1.263726525  | 0.141011142 | 0.234952254 | SMC5-AS1    |
| ENSG00000111653 | 667.1956693 | 472.4350652 | 0.498559167  | 0.141025604 | 0.234961281 | ING4        |
| ENSG00000278987 | 4.767428842 | 14.35822875 | -1.585781737 | 0.141128854 | 0.235118227 | AL031009.1  |
| ENSG00000287828 | 4.585079253 | 11.2308099  | -1.294195227 | 0.14114561  | 0.235131065 | AL354743.2  |
| ENSG00000155368 | 1922.817196 | 1522.686231 | 0.336660524  | 0.141351822 | 0.235445768 | DBI         |
| novel.497       | 2.06654734  | 12.92004755 | -2.63474016  | 0.141352645 | 0.235445768 | -           |
| ENSG00000110680 | 0           | 3.300895859 | -4.302205811 | 0.141383597 | 0.235482084 | CALCA       |
| ENSG00000162779 | 5.9643541   | 1.00940975  | 2.526756023  | 0.141392576 | 0.235482084 | AXDND1      |
| ENSG00000161243 | 128.6904046 | 87.01650075 | 0.567582525  | 0.141575435 | 0.235765563 | AC010605.1  |
| ENSG00000272419 | 75.54236815 | 141.6204648 | -0.905772402 | 0.141580937 | 0.235765563 | LINC01145   |
| ENSG00000122386 | 314.9958118 | 225.4606411 | 0.483484103  | 0.141596487 | 0.235776347 | ZNF205      |
| ENSG00000127603 | 3428.59242  | 4357.651319 | -0.345949568 | 0.141660597 | 0.235867981 | MACF1       |
| ENSG00000228369 | 0           | 2.211209725 | -3.721155613 | 0.141698568 | 1           | TXNDC12-AS1 |
| ENSG00000226790 | 0           | 2.211209725 | -3.721155613 | 0.141698568 | 1           | HNRNPA3P1   |
| ENSG00000274949 | 0           | 2.211209725 | -3.721155613 | 0.141698568 | 1           | AL109804.1  |
| ENSG00000248568 | 3.609580508 | 0           | 4.186014824  | 0.141705    | 0.235926792 | KRT8P48     |
| ENSG00000168297 | 594.7008204 | 441.7406153 | 0.429347967  | 0.141727761 | 0.235949568 | PXK         |
| ENSG00000078237 | 247.6412929 | 149.6325471 | 0.725420624  | 0.141795896 | 0.236047874 | TIGAR       |
| novel.179       | 2.668144092 | 0           | 3.75221187   | 0.14195985  | 1           | -           |

|                 |             |             |              |             |             |            |
|-----------------|-------------|-------------|--------------|-------------|-------------|------------|
| ENSG00000234718 | 2.668144092 | 0           | 3.75221187   | 0.14195985  | 1           | AC007161.1 |
| ENSG00000142528 | 138.8444101 | 178.014928  | -0.358348004 | 0.141967095 | 0.236317728 | ZNF473     |
| ENSG00000071575 | 1832.715966 | 1260.613731 | 0.539639029  | 0.141977304 | 0.236319581 | TRIB2      |
| ENSG00000256525 | 246.3876683 | 313.2372929 | -0.346029043 | 0.142000794 | 0.236341838 | POLG2      |
| ENSG00000206712 | 1.538018572 | 6.123682254 | -2.001398521 | 0.142010279 | 0.236341838 | RNU6-26P   |
| ENSG00000230006 | 5.826024761 | 1.10029862  | 2.415310597  | 0.142017966 | 0.236341838 | ANKRD36BP2 |
| ENSG00000136279 | 2392.23054  | 3051.734618 | -0.351350273 | 0.142070859 | 0.236414718 | DBNL       |
| ENSG00000197744 | 28.12557767 | 41.80437826 | -0.572886866 | 0.142114669 | 0.236472474 | PTMAP2     |
| ENSG00000235078 | 11.5413008  | 4.617249819 | 1.315901673  | 0.14214289  | 0.236504285 | AC231981.1 |
| ENSG00000162105 | 42.38211958 | 17.87402408 | 1.244002252  | 0.142169556 | 0.2365203   | SHANK2     |
| ENSG00000260276 | 30.16064125 | 45.98365681 | -0.609073653 | 0.142170722 | 0.2365203   | AC022167.2 |
| ENSG00000275005 | 2.420248412 | 0           | 3.608993142  | 0.142251441 | 1           | AL354950.1 |
| ENSG00000249639 | 2.420248412 | 0           | 3.608993142  | 0.142251441 | 1           | AC022092.1 |
| ENSG00000181778 | 2.420248412 | 0           | 3.608993142  | 0.142251441 | 1           | TMEM252    |
| ENSG00000143167 | 2.420248412 | 0           | 3.608993142  | 0.142251441 | 1           | GPA33      |
| ENSG00000239218 | 1.54052587  | 6.735258924 | -2.139191637 | 0.142380382 | 0.236853932 | RPS20P22   |
| ENSG00000223138 | 3.839853833 | 0           | 4.276369157  | 0.142401851 | 0.236874478 | RNA5SP450  |
| novel.169       | 7.260745237 | 1.813376645 | 2.006526152  | 0.142478836 | 0.236987364 | -          |
| ENSG00000186732 | 2.416487466 | 0           | 3.606994444  | 0.14252256  | 1           | MPPED1     |
| ENSG00000248884 | 2.416487466 | 0           | 3.606994444  | 0.14252256  | 1           | AC010280.2 |
| ENSG00000276814 | 9.9717272   | 3.995060664 | 1.327236527  | 0.142543822 | 0.237080278 | AC004801.6 |
| ENSG00000230280 | 2.72484337  | 7.540381694 | -1.468549201 | 0.14258586  | 0.237135017 | HNRNPA1P59 |
| ENSG00000249348 | 53.78932271 | 37.34053635 | 0.527326679  | 0.142604852 | 0.237151421 | UGDH-AS1   |
| ENSG00000114742 | 873.9580875 | 709.6583766 | 0.300506125  | 0.142645787 | 0.237204313 | WDR48      |
| ENSG00000224687 | 15.14955639 | 28.30099547 | -0.904912832 | 0.142669123 | 0.237227935 | RASAL2-AS1 |
| ENSG00000100242 | 2190.058193 | 1686.020668 | 0.377369988  | 0.142694263 | 0.237241431 | SUN2       |
| ENSG00000067191 | 160.0171003 | 222.9484761 | -0.477222305 | 0.142695502 | 0.237241431 | CACNB1     |
| ENSG00000279897 | 3.900314058 | 0.743759607 | 2.4218337    | 0.142767552 | 0.23734603  | BIRC6-AS2  |
| ENSG00000287095 | 4.484288455 | 0.713078025 | 2.648965952  | 0.14278713  | 0.237363391 | AF228272.1 |
| ENSG00000280023 | 0           | 3.596071708 | -4.427600034 | 0.142798933 | 0.237367823 | AD000813.1 |
| ENSG00000267510 | 24.84699002 | 11.92625897 | 1.051470083  | 0.142820861 | 0.237389085 | AC011451.1 |
| ENSG00000234779 | 8.933545666 | 33.33285542 | -1.903390581 | 0.14284578  | 0.237415315 | BNC2-AS1   |
| ENSG00000077721 | 1324.818787 | 1613.229618 | -0.284322573 | 0.142870211 | 0.237440732 | UBE2A      |
| ENSG00000109756 | 1071.958268 | 769.4655158 | 0.478661884  | 0.142891184 | 0.237460397 | RAPGEF2    |
| ENSG00000253200 | 56.90067583 | 38.80811486 | 0.549128518  | 0.142912568 | 0.237473307 | AC037459.2 |
| ENSG00000132824 | 2945.141356 | 3716.888993 | -0.335765122 | 0.142917233 | 0.237473307 | SERINC3    |
| ENSG00000227972 | 3.062175737 | 0.356539013 | 2.984265892  | 0.142982353 | 0.237566317 | THAP12P3   |
| ENSG00000149218 | 5183.190133 | 3050.198489 | 0.764860527  | 0.143005799 | 0.23759008  | ENDOD1     |
| ENSG00000261407 | 0           | 3.383483993 | -4.335665345 | 0.143084215 | 0.23770516  | AC013565.3 |
| ENSG00000262312 | 7.584216197 | 2.241891306 | 1.780736032  | 0.143256021 | 0.237975364 | AC004494.1 |
| ENSG00000226031 | 2.405133356 | 0           | 3.600907272  | 0.143348218 | 1           | FGF13-AS1  |
| ENSG00000213918 | 348.780963  | 261.6484111 | 0.415114367  | 0.143359108 | 0.238131384 | DNASE1     |
| ENSG00000165731 | 24.44801505 | 11.4739508  | 1.101433041  | 0.14342451  | 0.238224792 | RET        |
| ENSG00000215795 | 8.359386996 | 2.058957692 | 2.001408455  | 0.143454112 | 0.238238458 | AL390728.2 |
| ENSG00000198857 | 6.986451663 | 16.38406472 | -1.22807314  | 0.1434565   | 0.238238458 | HSD3BP5    |
| ENSG00000131725 | 350.6416536 | 459.3985368 | -0.389587515 | 0.143460247 | 0.238238458 | WDR44      |
| ENSG00000169105 | 725.0314139 | 907.5337759 | -0.32419754  | 0.143485121 | 0.238258713 | CHST14     |
| ENSG00000214273 | 3.588197208 | 0           | 4.17787958   | 0.143501151 | 0.238258713 | AGGF1P1    |
| ENSG00000138161 | 3.588197208 | 0           | 4.17787958   | 0.143501151 | 0.238258713 | CUZD1      |
| ENSG00000151572 | 15.1609105  | 29.10342131 | -0.93629287  | 0.143509126 | 0.238258713 | ANO4       |
| ENSG00000285081 | 2.402626059 | 0           | 3.599568875  | 0.143531038 | 1           | AC004593.2 |

|                 |             |             |              |             |             |            |
|-----------------|-------------|-------------|--------------|-------------|-------------|------------|
| ENSG00000228923 | 2.402626059 | 0           | 3.599568875  | 0.143531038 | 1           | AP000355.1 |
| ENSG00000272696 | 22.88374077 | 8.671233501 | 1.41173119   | 0.143537298 | 0.238290258 | AL359091.4 |
| ENSG00000237595 | 1.50778846  | 5.747074145 | -1.927998437 | 0.143558086 | 0.238309542 | LINC01275  |
| ENSG0000027644  | 20.64222319 | 3.761376372 | 2.446138045  | 0.143571309 | 0.238316264 | INSRR      |
| ENSG00000277351 | 3.62978143  | 0           | 4.193669719  | 0.143625234 | 0.238390546 | AC013553.3 |
| ENSG00000198589 | 598.4515769 | 758.2967238 | -0.341417348 | 0.143658063 | 0.238429802 | LRBA       |
| ENSG00000225822 | 5.439586279 | 1.069617038 | 2.341338639  | 0.143765153 | 0.238592299 | UBXN7-AS1  |
| ENSG00000188529 | 1725.259104 | 2114.913853 | -0.293822389 | 0.143787627 | 0.238601276 | SRSF10     |
| ENSG00000057294 | 397.7362265 | 141.4765732 | 1.490563567  | 0.14378893  | 0.238601276 | PKP2       |
| ENSG00000172971 | 1.521649867 | 7.000909067 | -2.208375926 | 0.143812246 | 0.238624727 | UNC93B3    |
| ENSG00000089505 | 35.50222876 | 22.91978856 | 0.629642575  | 0.144113679 | 0.239109617 | CMTM1      |
| ENSG00000111906 | 784.3239872 | 1126.281307 | -0.522324698 | 0.144149159 | 0.239153212 | HDDC2      |
| ENSG00000267424 | 0           | 2.180528143 | -3.703638643 | 0.144161391 | 1           | AC020934.1 |
| ENSG00000257727 | 209.7043139 | 146.9926475 | 0.513509612  | 0.144185763 | 0.239198666 | CNPY2      |
| ENSG00000239830 | 3.021845164 | 0.387220594 | 2.967745388  | 0.144301724 | 0.239375755 | RPS4XP22   |
| ENSG00000168067 | 461.8072426 | 628.4651515 | -0.444109981 | 0.144335511 | 0.239416518 | MAP4K2     |
| ENSG00000110318 | 232.4545539 | 147.8158659 | 0.654846741  | 0.144369027 | 0.239456824 | CEP126     |
| ENSG00000254506 | 3.696509898 | 0           | 4.218712312  | 0.144448472 | 0.239573301 | AP003080.1 |
| ENSG00000182257 | 22.40277974 | 8.685570401 | 1.358424662  | 0.144527502 | 0.239689075 | PRR34      |
| novel.212       | 3.016830569 | 0.387220594 | 2.965698876  | 0.14455113  | 0.239712958 | -          |
| ENSG00000174977 | 223.103442  | 166.3070833 | 0.423263785  | 0.144585365 | 0.239754427 | AC026271.1 |
| ENSG00000258701 | 30.6554637  | 18.8845897  | 0.694870946  | 0.144689992 | 0.23991261  | LINC00638  |
| ENSG00000118271 | 3.688988006 | 0           | 4.215914936  | 0.144820926 | 0.240068428 | TTR        |
| ENSG00000250891 | 3.688988006 | 0           | 4.215914936  | 0.144820926 | 0.240068428 | LINC02208  |
| ENSG00000286805 | 3.688988006 | 0           | 4.215914936  | 0.144820926 | 0.240068428 | AL138716.1 |
| ENSG00000201724 | 3.688988006 | 0           | 4.215914936  | 0.144820926 | 0.240068428 | RF00019    |
| ENSG00000175197 | 661.5181324 | 436.4246118 | 0.600706636  | 0.144899646 | 0.240171989 | DDIT3      |
| ENSG00000261175 | 16.61486299 | 3.873490212 | 2.095268204  | 0.144901887 | 0.240171989 | LINC02188  |
| ENSG00000226824 | 29.70643412 | 46.13102855 | -0.632301069 | 0.144960455 | 0.240253737 | AC006001.2 |
| ENSG00000261052 | 5.14759908  | 12.05600176 | -1.222762693 | 0.145002258 | 0.240307691 | SULT1A3    |
| ENSG00000116288 | 3751.944185 | 4752.849584 | -0.341195266 | 0.14509859  | 0.240452    | PARK7      |
| ENSG00000267192 | 3.649911081 | 0.693008929 | 2.364567487  | 0.145172405 | 0.24055898  | AC006116.4 |
| ENSG00000260144 | 3.016830569 | 0.356539013 | 2.965695397  | 0.145243308 | 0.240661122 | AC100827.2 |
| ENSG00000249986 | 0.909952655 | 4.433031935 | -2.278206746 | 0.145342802 | 0.240810621 | YWHAQP6    |
| ENSG00000204815 | 44.74391687 | 30.30778983 | 0.564820227  | 0.145419041 | 0.240921573 | TTC25      |
| ENSG00000270112 | 1.200686205 | 5.349241065 | -2.152211385 | 0.145457049 | 0.240969176 | AC090241.2 |
| ENSG00000167118 | 989.3991883 | 1261.779409 | -0.351008067 | 0.145471041 | 0.24097699  | URM1       |
| ENSG00000255154 | 5.072023799 | 1.110911105 | 2.215748769  | 0.145585747 | 0.241151628 | HTD2       |
| ENSG00000144026 | 548.8277031 | 413.9585909 | 0.407622619  | 0.145633006 | 0.241214531 | ZNF514     |
| ENSG00000147813 | 42.44745221 | 80.6893831  | -0.92771109  | 0.145733556 | 0.241365686 | NAPRT      |
| ENSG00000145723 | 139.9965597 | 103.5026276 | 0.43482463   | 0.145915343 | 0.241651359 | GIN1       |
| ENSG00000272205 | 5.198030114 | 1.10029862  | 2.252162584  | 0.145996947 | 0.241771093 | AL451050.2 |
| ENSG00000137860 | 1.201939854 | 5.012771149 | -2.05652718  | 0.146121467 | 0.241961876 | SLC28A2    |
| ENSG00000248126 | 5.18166141  | 1.029478846 | 2.300018358  | 0.146131986 | 0.241963873 | AC091849.1 |
| ENSG00000103044 | 38.07939779 | 21.14526584 | 0.854525142  | 0.146188746 | 0.242042431 | HAS3       |
| ENSG00000253394 | 3.579350395 | 0           | 4.174479825  | 0.146206438 | 0.242056296 | LINC00534  |
| ENSG00000207973 | 0.293240848 | 4.057708096 | -3.646341414 | 0.14622604  | 0.242073324 | MIR589     |
| ENSG00000171794 | 2.449224876 | 0           | 3.624454056  | 0.146297163 | 1           | UTF1       |
| ENSG00000242113 | 2.449224876 | 0           | 3.624454056  | 0.146297163 | 1           | RN7SL124P  |
| ENSG00000007350 | 2.449224876 | 0           | 3.624454056  | 0.146297163 | 1           | TKTL1      |
| ENSG00000268027 | 2.449224876 | 0           | 3.624454056  | 0.146297163 | 1           | AC243960.1 |

|                 |             |             |              |             |             |            |
|-----------------|-------------|-------------|--------------|-------------|-------------|------------|
| ENSG00000260302 | 2.449224876 | 0           | 3.624454056  | 0.146297163 | 1           | AP005482.1 |
| ENSG00000226849 | 8.687943822 | 2.435565801 | 1.820673298  | 0.146297913 | 0.242147648 | AL109811.1 |
| ENSG00000117500 | 1247.882343 | 1577.707292 | -0.338541914 | 0.146298337 | 0.242147648 | TMED5      |
| ENSG00000277991 | 7.934227594 | 2.241891306 | 1.843267109  | 0.146299891 | 0.242147648 | FP236241.1 |
| ENSG00000077713 | 618.3545307 | 482.0506803 | 0.35871842   | 0.146312292 | 0.242147648 | SLC25A43   |
| ENSG00000258659 | 3.619680969 | 0.693008929 | 2.354854385  | 0.146317537 | 0.242147648 | TRIM34     |
| ENSG00000184524 | 65.84732746 | 129.7127811 | -0.977820769 | 0.146337967 | 0.242166033 | CEND1      |
| ENSG00000163635 | 21.34167652 | 9.312464272 | 1.196337251  | 0.146441046 | 0.242301866 | ATXN7      |
| ENSG00000153815 | 614.0022439 | 837.8764464 | -0.448499679 | 0.146442798 | 0.242301866 | CMIP       |
| ENSG00000188396 | 6.554596742 | 19.05228733 | -1.535643749 | 0.146449702 | 0.242301866 | TCTEX1D4   |
| ENSG00000147873 | 3.5743358   | 0           | 4.172563871  | 0.14646668  | 0.242301866 | IFNA5      |
| ENSG00000183632 | 3.5743358   | 0           | 4.172563871  | 0.14646668  | 0.242301866 | TP53TG3    |
| ENSG00000149091 | 960.7063175 | 1163.014419 | -0.27581139  | 0.146537817 | 0.24239898  | DGKZ       |
| ENSG00000106113 | 4.855611881 | 1.029478846 | 2.204856357  | 0.146544043 | 0.24239898  | CRHR2      |
| ENSG00000259377 | 2.44546393  | 0           | 3.622464245  | 0.14657063  | 1           | AC026770.1 |
| ENSG00000198670 | 2.44546393  | 0           | 3.622464245  | 0.14657063  | 1           | LPA        |
| ENSG00000231789 | 12.99991188 | 6.379875787 | 1.019813625  | 0.146660914 | 0.242576852 | PIK3CD-AS2 |
| ENSG00000121068 | 1695.431688 | 2303.763938 | -0.442293989 | 0.146677892 | 0.242589491 | TBX2       |
| ENSG00000226913 | 6.712086818 | 2.211209725 | 1.617414248  | 0.14678491  | 0.242751035 | BSN-DT     |
| ENSG00000286650 | 3.064683035 | 0.356539013 | 2.985347209  | 0.146820339 | 0.242794172 | AL139234.1 |
| ENSG00000249258 | 7.41795058  | 1.722487775 | 2.087898865  | 0.1468566   | 0.242838679 | AC079193.2 |
| ENSG00000156232 | 344.4981849 | 274.8555094 | 0.32617436   | 0.146898012 | 0.242891697 | WHAMM      |
| ENSG00000165568 | 24.98148714 | 42.40893847 | -0.764929388 | 0.146964673 | 0.242972361 | AKR1E2     |
| ENSG00000198918 | 4603.514784 | 6115.156565 | -0.409663603 | 0.146970244 | 0.242972361 | RPL39      |
| ENSG00000230943 | 9.785616665 | 3.607840069 | 1.440383657  | 0.146974852 | 0.242972361 | LINC02541  |
| ENSG00000232606 | 5.688735607 | 1.069617038 | 2.407528987  | 0.147003348 | 0.242989941 | LINC01412  |
| ENSG00000100417 | 696.1489167 | 918.3843008 | -0.399618153 | 0.147008897 | 0.242989941 | PMM1       |
| ENSG00000118939 | 27.60338842 | 45.7709407  | -0.72914818  | 0.147013544 | 0.242989941 | UCHL3      |
| ENSG00000279425 | 23.00158446 | 9.344173335 | 1.311820604  | 0.147175612 | 0.243242339 | AC092279.2 |
| ENSG00000236449 | 7.195270418 | 2.241891306 | 1.708670243  | 0.147199557 | 0.243266439 | AC010894.3 |
| ENSG00000260456 | 21.30155941 | 43.31453511 | -1.026712822 | 0.147224407 | 0.243292032 | C16orf95   |
| ENSG00000107890 | 236.8862604 | 310.8528158 | -0.392105002 | 0.147269499 | 0.243351068 | ANKRD26    |
| ENSG00000128581 | 264.4746756 | 358.0325536 | -0.437659786 | 0.147280097 | 0.243353104 | IFT22      |
| ENSG00000278071 | 5.230767524 | 0.743759607 | 2.834039264  | 0.14729701  | 0.243365571 | AL161669.3 |
| ENSG00000271860 | 2.435363469 | 0           | 3.617071615  | 0.147311292 | 1           | AL589740.1 |
| ENSG00000254401 | 2.435363469 | 0           | 3.617071615  | 0.147311292 | 1           | AC111188.1 |
| ENSG00000276302 | 2.435363469 | 0           | 3.617071615  | 0.147311292 | 1           | AL021997.3 |
| ENSG00000149646 | 5.453447686 | 1.396630344 | 1.946475077  | 0.147316151 | 0.243381719 | CNBD2      |
| ENSG00000248027 | 3.060922088 | 0.336469917 | 2.983823073  | 0.14745431  | 0.243587127 | AP001351.1 |
| ENSG00000047230 | 323.6023672 | 422.3455651 | -0.383560763 | 0.147459233 | 0.243587127 | CTPS2      |
| ENSG00000286347 | 0           | 2.140389951 | -3.680034809 | 0.147509575 | 1           | AC114802.1 |
| ENSG00000279903 | 0           | 2.140389951 | -3.680034809 | 0.147509575 | 1           | AP006248.3 |
| ENSG00000171451 | 0           | 2.140389951 | -3.680034809 | 0.147509575 | 1           | DSEL       |
| ENSG00000254244 | 0.293240848 | 2.547679642 | -2.964650038 | 0.147583632 | 0.243777122 | PAICSP4    |
| novel.825       | 92.62307746 | 42.9168776  | 1.106039127  | 0.14763495  | 0.243846385 | -          |
| ENSG00000255587 | 2.430348874 | 0           | 3.614406644  | 0.147679995 | 1           | RAB44      |
| ENSG00000167807 | 2.430348874 | 0           | 3.614406644  | 0.147679995 | 1           | AC011511.1 |
| ENSG00000229648 | 2.430348874 | 0           | 3.614406644  | 0.147679995 | 1           | RPSAP22    |
| ENSG00000262096 | 2.430348874 | 0           | 3.614406644  | 0.147679995 | 1           | PCDHB19P   |
| ENSG00000228918 | 2.430348874 | 0           | 3.614406644  | 0.147679995 | 1           | LINC01344  |
| ENSG00000244044 | 2.430348874 | 0           | 3.614406644  | 0.147679995 | 1           | RN7SL735P  |

|                 |             |             |              |             |             |            |
|-----------------|-------------|-------------|--------------|-------------|-------------|------------|
| ENSG00000177697 | 7210.294515 | 9350.847726 | -0.375008413 | 0.147700669 | 0.243939424 | CD151      |
| ENSG00000271849 | 10.58843901 | 2.355289417 | 2.14450711   | 0.147832924 | 0.244142334 | AC012603.1 |
| ENSG00000256229 | 122.9856563 | 171.6131037 | -0.482222953 | 0.147915135 | 0.244262577 | ZNF486     |
| ENSG00000107821 | 226.3246306 | 660.3182224 | -1.545004963 | 0.147968029 | 0.244334394 | KAZALD1    |
| novel.393       | 21.62391926 | 46.40968415 | -1.101228009 | 0.148032036 | 0.244424551 | -          |
| ENSG00000244509 | 949.2482709 | 1256.269602 | -0.404393826 | 0.148099547 | 0.244520483 | APOBEC3C   |
| ENSG00000142546 | 860.3802119 | 1096.030151 | -0.349246977 | 0.148142421 | 0.244570246 | NOSIP      |
| ENSG00000267064 | 11.2518209  | 22.33876508 | -0.986303796 | 0.148148514 | 0.244570246 | UXT-AS1    |
| ENSG00000053438 | 138.0064408 | 43.66405766 | 1.65901637   | 0.148271171 | 0.244757182 | NNAT       |
| ENSG00000280828 | 11.9312155  | 3.912472529 | 1.60645264   | 0.148337953 | 0.244851865 | AC090114.3 |
| ENSG00000152580 | 26.86038556 | 12.19776971 | 1.140298225  | 0.148361058 | 0.244874446 | IGSF10     |
| ENSG00000238913 | 0           | 2.129777466 | -3.674069902 | 0.148393852 | 1           | RNU7-196P  |
| ENSG00000274879 | 0           | 2.129777466 | -3.674069902 | 0.148393852 | 1           | AC009804.1 |
| ENSG00000213030 | 0           | 2.129777466 | -3.674069902 | 0.148393852 | 1           | CGB8       |
| ENSG00000224985 | 1.846374476 | 6.613560079 | -1.843751602 | 0.148473767 | 0.245044908 | AL590714.1 |
| ENSG00000013561 | 1046.443948 | 835.4135639 | 0.324602066  | 0.148502449 | 0.245076678 | RNF14      |
| ENSG00000187079 | 4660.191113 | 3269.121142 | 0.51143731   | 0.148534523 | 0.245114039 | TEAD1      |
| ENSG00000170379 | 1.773306493 | 7.408198758 | -2.054981539 | 0.148595896 | 0.245199744 | TCAF2      |
| ENSG00000149927 | 28.9006772  | 14.32053071 | 1.005806765  | 0.148624752 | 0.245219206 | DOC2A      |
| ENSG00000164743 | 33.42439859 | 50.8453318  | -0.608582736 | 0.148626567 | 0.245219206 | C8orf48    |
| ENSG00000148690 | 645.8574405 | 521.7547127 | 0.307861522  | 0.148653333 | 0.245247793 | FRA10AC1   |
| ENSG00000250384 | 0           | 3.12857473  | -4.229776038 | 0.148676193 | 0.245269933 | UBE2CP3    |
| novel.594       | 10.34939014 | 4.199347643 | 1.285715079  | 0.148725211 | 0.245335219 | -          |
| ENSG00000274276 | 49.36152007 | 117.4076619 | -1.250911187 | 0.148761342 | 0.245365818 | CBSL       |
| ENSG00000162695 | 573.6596483 | 743.7146314 | -0.374794446 | 0.148762648 | 0.245365818 | SLC30A7    |
| ENSG00000232909 | 5.760549941 | 12.3217803  | -1.104026724 | 0.148786127 | 0.245388965 | AL157823.2 |
| ENSG00000238083 | 29.33246085 | 15.00981522 | 0.972678126  | 0.14880166  | 0.245399005 | LRRC37A2   |
| ENSG00000128607 | 954.4220681 | 783.7625826 | 0.283989757  | 0.148863539 | 0.245485472 | KLHDC10    |
| novel.1050      | 4.007373099 | 0           | 4.335340279  | 0.148873091 | 0.245485641 | -          |
| ENSG00000270629 | 261.7841087 | 347.6799036 | -0.409807106 | 0.149064958 | 0.245777695 | NBPF14     |
| ENSG00000101220 | 803.846842  | 1055.597547 | -0.393376513 | 0.149073312 | 0.245777695 | C20orf27   |
| ENSG00000285650 | 7.81699682  | 2.537067156 | 1.630221891  | 0.149078584 | 0.245777695 | AL157827.2 |
| ENSG00000255434 | 6.958728849 | 2.51699806  | 1.468487543  | 0.149155408 | 0.245888747 | AP001922.6 |
| ENSG00000226853 | 11.26818961 | 3.781445468 | 1.55522896   | 0.149184308 | 0.245920786 | AC010894.2 |
| ENSG00000148450 | 379.4621679 | 511.0363374 | -0.429372745 | 0.149221218 | 0.245966023 | MSRB2      |
| ENSG00000171843 | 182.0948269 | 269.827327  | -0.566604544 | 0.149235582 | 0.245974095 | MLLT3      |
| novel.1031      | 42.25339251 | 25.91361181 | 0.710082989  | 0.149282134 | 0.246016426 | -          |
| ENSG00000112658 | 1060.150751 | 1365.09742  | -0.36477165  | 0.149286768 | 0.246016426 | SRF        |
| ENSG00000161217 | 1240.092771 | 1550.409203 | -0.322377003 | 0.149289672 | 0.246016426 | PCYT1A     |
| ENSG00000186468 | 5666.159207 | 7452.707897 | -0.395375511 | 0.149302915 | 0.246022644 | RPS23      |
| ENSG00000273733 | 7.209131825 | 2.547679642 | 1.51208701   | 0.149345913 | 0.246077789 | AC011472.4 |
| ENSG00000272620 | 23.34819056 | 7.213368388 | 1.694422272  | 0.14936804  | 0.246084044 | AFAP1-AS1  |
| ENSG00000254122 | 103.4517477 | 138.7854433 | -0.423430367 | 0.149368592 | 0.246084044 | PCDHGB7    |
| ENSG00000287781 | 0           | 3.270214277 | -4.289627242 | 0.149388558 | 0.24608573  | AC018714.2 |
| ENSG00000225751 | 0           | 3.270214277 | -4.289627242 | 0.149388558 | 0.24608573  | AC087501.1 |
| ENSG00000078403 | 859.5150947 | 643.8309102 | 0.41714266   | 0.149410342 | 0.246100099 | MLLT10     |
| ENSG00000179832 | 766.2481079 | 1142.266213 | -0.575749927 | 0.14941998  | 0.246100099 | MROH1      |
| ENSG00000070759 | 141.3339221 | 77.26002904 | 0.873249983  | 0.149425698 | 0.246100099 | TESK2      |
| ENSG00000185236 | 1585.5843   | 2077.735764 | -0.389988349 | 0.149458321 | 0.246138225 | RAB11B     |
| ENSG00000246792 | 8.74331818  | 2.904218654 | 1.59685538   | 0.149492134 | 0.246149333 | AC106038.1 |
| ENSG00000224190 | 3.993582963 | 0           | 4.33056934   | 0.149499131 | 0.246149333 | LINC02667  |

|                 |             |             |              |             |             |            |
|-----------------|-------------|-------------|--------------|-------------|-------------|------------|
| ENSG00000204338 | 3.993511692 | 0           | 4.330534982  | 0.149502963 | 0.246149333 | CYP21A1P   |
| ENSG00000285476 | 3.993511692 | 0           | 4.330534982  | 0.149502963 | 0.246149333 | AC139491.7 |
| ENSG00000280128 | 0.308355904 | 3.465044647 | -3.417371206 | 0.149618076 | 0.246323251 | AL662795.2 |
| novel.1069      | 11.38004978 | 2.0188195   | 2.474430034  | 0.149691236 | 0.246428082 | -          |
| ENSG00000156531 | 591.722596  | 755.4084778 | -0.352010917 | 0.149718213 | 0.246450546 | PHF6       |
| ENSG00000106392 | 656.7177103 | 829.992638  | -0.338013404 | 0.149723853 | 0.246450546 | C1GALT1    |
| ENSG00000280670 | 50.82342172 | 27.3622771  | 0.893439828  | 0.149766213 | 0.246494987 | CCDC163    |
| ENSG00000173261 | 13.84689701 | 6.562809401 | 1.086955452  | 0.149769827 | 0.246494987 | PLAC8L1    |
| ENSG00000166183 | 4.27672335  | 0.672939833 | 2.618706283  | 0.1498676   | 0.246640281 | ASPG       |
| ENSG00000170310 | 529.7711646 | 416.2607367 | 0.348645705  | 0.149893192 | 0.246666773 | STX8       |
| ENSG00000135477 | 0           | 3.108505634 | -4.221080734 | 0.149911841 | 0.246681838 | KRT87P     |
| ENSG00000127364 | 24.96386479 | 14.08427787 | 0.830095142  | 0.149950923 | 0.246730521 | TAS2R4     |
| ENSG00000286340 | 15.70204703 | 7.74582455  | 1.010375219  | 0.149979221 | 0.246761455 | AL356776.2 |
| ENSG00000164879 | 16.94814967 | 7.408198758 | 1.186867129  | 0.149995592 | 0.246772763 | CA3        |
| ENSG00000136861 | 1026.121523 | 1310.2162   | -0.352652672 | 0.150051697 | 0.246849436 | CDK5RAP2   |
| ENSG00000250274 | 6.451298646 | 0           | 5.024101335  | 0.150093611 | 0.246901782 | AC034199.1 |
| ENSG00000163618 | 1.522903516 | 5.93000776  | -1.957121581 | 0.150102523 | 0.246901782 | CADPS      |
| ENSG00000251556 | 0           | 2.10970837  | -3.66210823  | 0.150128317 | 1           | AC091887.1 |
| ENSG00000253102 | 0           | 2.10970837  | -3.66210823  | 0.150128317 | 1           | AC004707.1 |
| ENSG00000273012 | 0           | 2.10970837  | -3.66210823  | 0.150128317 | 1           | AL353600.1 |
| ENSG00000234390 | 29.72029552 | 18.55873227 | 0.67619598   | 0.150210327 | 0.247060807 | USP27X-AS1 |
| ENSG00000258861 | 0           | 3.148643826 | -4.238383214 | 0.15021822  | 0.247060807 | MIR381HG   |
| novel.698       | 90.96385371 | 129.793875  | -0.511422572 | 0.150248593 | 0.247079533 | -          |
| ENSG00000170100 | 218.6033265 | 172.0945052 | 0.344622122  | 0.150248626 | 0.247079533 | ZNF778     |
| ENSG00000170409 | 0.293240848 | 2.862924587 | -3.137814111 | 0.15027852  | 0.247112371 | AC091390.1 |
| ENSG00000255725 | 1.803536605 | 5.676254372 | -1.653623627 | 0.150287617 | 0.247112371 | TDGP1      |
| ENSG00000260325 | 7.488511265 | 2.527610546 | 1.573558066  | 0.150432327 | 0.247326545 | HSPB9      |
| ENSG00000103024 | 1112.019105 | 872.6152738 | 0.349999287  | 0.150436911 | 0.247326545 | NME3       |
| ENSG00000237986 | 4.706968617 | 0.356539013 | 3.608925181  | 0.150450236 | 0.247332801 | CELF2-AS2  |
| ENSG00000285230 | 35.67071695 | 52.87103937 | -0.566655368 | 0.150461244 | 0.247335247 | RALY-AS1   |
| novel.725       | 225.8723056 | 354.4118583 | -0.649181512 | 0.150511835 | 0.247402758 | -          |
| ENSG00000101558 | 3626.208979 | 2936.171686 | 0.304581047  | 0.150560756 | 0.247467515 | VAPA       |
| ENSG00000064835 | 2.726097019 | 0.387220594 | 2.818663169  | 0.150666093 | 0.247624984 | POU1F1     |
| ENSG00000176783 | 42.36894236 | 73.72043988 | -0.799395926 | 0.150683503 | 0.247634171 | RUFY1      |
| ENSG00000270832 | 0.293240848 | 2.496928964 | -2.941196341 | 0.150690745 | 0.247634171 | AC092120.2 |
| ENSG00000251189 | 2.3900183   | 0           | 3.592708051  | 0.150693873 | 1           | AC010425.1 |
| ENSG00000088002 | 7.136063842 | 1.793307549 | 1.994599047  | 0.150725134 | 0.247675018 | SULT2B1    |
| ENSG00000089280 | 6137.830941 | 7940.998217 | -0.371616941 | 0.150788798 | 0.247763962 | FUS        |
| ENSG00000230661 | 2.388764651 | 0           | 3.592032746  | 0.15078918  | 1           | YY1P1      |
| ENSG00000236732 | 2.388764651 | 0           | 3.592032746  | 0.15078918  | 1           | AC094019.1 |
| ENSG00000230992 | 2.388764651 | 0           | 3.592032746  | 0.15078918  | 1           | FAM201B    |
| ENSG00000287508 | 2.388764651 | 0           | 3.592032746  | 0.15078918  | 1           | AC009560.3 |
| ENSG00000219361 | 2.388764651 | 0           | 3.592032746  | 0.15078918  | 1           | RPSAP72    |
| ENSG00000261465 | 2.388764651 | 0           | 3.592032746  | 0.15078918  | 1           | AC099518.4 |
| ENSG00000170153 | 123.1526339 | 58.98351402 | 1.059512242  | 0.150911367 | 0.247949677 | RNF150     |
| ENSG00000138623 | 3111.126275 | 4713.173156 | -0.599194908 | 0.150954627 | 0.24800507  | SEMA7A     |
| ENSG00000270147 | 8.850448493 | 2.772035718 | 1.655055633  | 0.150988578 | 0.248045162 | AC068620.2 |
| ENSG00000122966 | 1499.918011 | 956.7383299 | 0.648696808  | 0.151026043 | 0.248091024 | CIT        |
| ENSG00000128609 | 1155.604475 | 935.8324468 | 0.304266849  | 0.151126535 | 0.248240407 | NDUFA5     |
| ENSG00000182544 | 566.2910455 | 722.1116295 | -0.35099343  | 0.151158427 | 0.248277096 | MFSD5      |
| ENSG00000278985 | 17.0409913  | 7.174386071 | 1.249811961  | 0.151174809 | 0.248288306 | AC092718.7 |



|                 |             |             |              |             |             |              |
|-----------------|-------------|-------------|--------------|-------------|-------------|--------------|
| ENSG00000250337 | 7.66863829  | 22.40598883 | -1.545964296 | 0.1513114   | 0.248496933 | PURPL        |
| ENSG00000271092 | 19.28397599 | 10.4965069  | 0.883053093  | 0.15134663  | 0.248539081 | TMEM56-RWDD3 |
| novel.1075      | 89.13628396 | 124.6538824 | -0.482765608 | 0.151362786 | 0.248549901 | -            |
| ENSG00000090266 | 1173.69047  | 1578.794213 | -0.427921129 | 0.151414607 | 0.248619283 | NDUFB2       |
| ENSG00000233009 | 3.560474393 | 0           | 4.167206274  | 0.151424943 | 0.248620541 | NALCN-AS1    |
| ENSG00000272334 | 2.726097019 | 0.356539013 | 2.818663835  | 0.151476695 | 0.248685338 | AC011816.2   |
| ENSG00000224837 | 68.34147058 | 109.2290375 | -0.678850133 | 0.151483552 | 0.248685338 | GCSHP5       |
| ENSG00000287738 | 4.150717034 | 0.356539013 | 3.427334391  | 0.151521582 | 0.248732053 | AL359764.3   |
| ENSG00000078699 | 578.0308949 | 429.2479609 | 0.430087306  | 0.15154178  | 0.248742963 | CBFA2T2      |
| ENSG00000270953 | 17.71844807 | 3.92192914  | 2.173089956  | 0.151547375 | 0.248742963 | AC007938.3   |
| ENSG00000230805 | 3.697763547 | 0           | 4.219224898  | 0.151593884 | 0.248803581 | AL132709.1   |
| ENSG00000169583 | 23.20971903 | 63.75918043 | -1.460103942 | 0.151624738 | 0.248838502 | CLIC3        |
| ENSG00000130348 | 417.8895408 | 310.6457163 | 0.427025846  | 0.151724621 | 0.248986697 | QRSL1        |
| ENSG00000099290 | 1690.223539 | 1205.221545 | 0.4879679    | 0.151769084 | 0.249043932 | WASHC2A      |
| ENSG00000137573 | 195.7286022 | 1018.601959 | -2.37972614  | 0.151779688 | 0.249045603 | SULF1        |
| ENSG00000286881 | 6.673081165 | 1.029478846 | 2.673216463  | 0.151860172 | 0.249161927 | AL358780.1   |
| ENSG00000151466 | 255.6192563 | 339.0148346 | -0.40769872  | 0.151901433 | 0.249213888 | SCLT1        |
| ENSG00000261513 | 0.308355904 | 3.444975551 | -3.409754143 | 0.151938762 | 0.249259392 | AC009097.4   |
| ENSG00000225611 | 3.649911081 | 0.743759607 | 2.323542466  | 0.151965749 | 0.249287924 | LINC02158    |
| ENSG00000189127 | 3.687734357 | 0           | 4.215487457  | 0.152102927 | 0.249481449 | ANKRD34B     |
| ENSG00000267130 | 3.687734357 | 0           | 4.215487457  | 0.152102927 | 0.249481449 | AC008738.2   |
| ENSG00000126583 | 0.601596751 | 4.401194479 | -2.863876382 | 0.152241288 | 0.249688282 | PRKCG        |
| ENSG00000212421 | 0           | 3.415449845 | -4.357082703 | 0.152248249 | 0.249688282 | RF00568      |
| ENSG00000261329 | 8.913131281 | 2.884149558 | 1.633634905  | 0.152280963 | 0.24972617  | AC016597.1   |
| ENSG00000230306 | 8.822725678 | 3.016332495 | 1.57344536   | 0.152306928 | 0.249752985 | BANF1P2      |
| ENSG00000186312 | 88.17202497 | 133.7333047 | -0.600527571 | 0.15234135  | 0.249793664 | CA5BP1       |
| ENSG00000111224 | 188.300595  | 147.6549748 | 0.351639163  | 0.152365779 | 0.249817954 | PARP11       |
| ENSG00000173894 | 93.57977148 | 132.2293124 | -0.497876731 | 0.152403823 | 0.249864564 | CBX2         |
| ENSG00000184058 | 48.97579325 | 117.1442166 | -1.257741007 | 0.152521287 | 0.250041365 | TBX1         |
| ENSG00000259542 | 5.687481958 | 1.396630344 | 2.010948687  | 0.152553393 | 0.250069502 | AC087477.5   |
| ENSG00000255310 | 13.51834019 | 6.032793384 | 1.160064552  | 0.1525577   | 0.250069502 | AF131215.5   |
| ENSG00000261054 | 4.790137061 | 0.774441189 | 2.68029123   | 0.152649612 | 0.250204377 | AC036108.2   |
| ENSG00000138311 | 31.59786903 | 14.84566643 | 1.098213159  | 0.15271553  | 0.250296631 | ZNF365       |
| ENSG00000171067 | 2242.837588 | 1627.103107 | 0.46305922   | 0.152728314 | 0.250301794 | C11orf24     |
| ENSG00000197122 | 673.0877693 | 917.1856729 | -0.446033153 | 0.152769978 | 0.250354039 | SRC          |
| ENSG00000286943 | 8.339257344 | 2.200597239 | 1.934027386  | 0.152779465 | 0.250354039 | AP001992.2   |
| ENSG00000085185 | 263.5000039 | 366.1636125 | -0.473876066 | 0.152910154 | 0.250552391 | BCORL1       |
| ENSG00000166016 | 231.0735272 | 309.9046412 | -0.422396238 | 0.152949321 | 0.250600764 | ABTB2        |
| ENSG00000167733 | 122.9046392 | 172.6802338 | -0.488915051 | 0.153001977 | 0.25067123  | HSD11B1L     |
| ENSG00000005381 | 6.469205734 | 0.713078025 | 3.175794786  | 0.153097777 | 0.250812368 | MPO          |
| ENSG00000185022 | 823.6637251 | 1306.983681 | -0.665884715 | 0.153212208 | 0.250984009 | MAFF         |
| ENSG00000124678 | 2.128261214 | 7.245205845 | -1.767423298 | 0.153363681 | 0.251208093 | TCP11        |
| ENSG00000143971 | 469.1226662 | 347.8510688 | 0.431530471  | 0.153368337 | 0.251208093 | ETAA1        |
| ENSG00000259556 | 8.67784336  | 17.78300681 | -1.02783911  | 0.153445177 | 0.251318108 | AC090971.3   |
| ENSG00000060971 | 972.2757847 | 784.2226776 | 0.309873977  | 0.153491863 | 0.251378725 | ACAA1        |
| ENSG00000255026 | 8.567236835 | 2.11916498  | 2.006000334  | 0.153591418 | 0.251525915 | AC136475.3   |
| ENSG00000124659 | 351.2368827 | 448.2249121 | -0.351974392 | 0.153618177 | 0.25155388  | TBCC         |
| novel.564       | 3.657504245 | 0           | 4.204142865  | 0.153654677 | 0.251597792 | -            |
| ENSG00000048540 | 20.06319247 | 8.663189555 | 1.199304617  | 0.153733151 | 0.25170679  | LMO3         |
| ENSG00000150401 | 358.8711034 | 282.7639888 | 0.344228316  | 0.15374062  | 0.25170679  | DCUN1D2      |
| ENSG00000270195 | 20.51363866 | 11.52598575 | 0.83455635   | 0.153840847 | 0.251855012 | AC016773.1   |

|                 |             |             |              |             |             |            |
|-----------------|-------------|-------------|--------------|-------------|-------------|------------|
| ENSG00000080371 | 1343.291435 | 1092.595856 | 0.297956954  | 0.153897688 | 0.251926412 | RAB21      |
| ENSG00000112511 | 43.53918499 | 21.52290143 | 1.02352071   | 0.153903853 | 0.251926412 | PHF1       |
| ENSG00000164258 | 746.153017  | 922.7434986 | -0.306572828 | 0.153965334 | 0.252011173 | NDUFS4     |
| ENSG00000238390 | 7.18140901  | 2.241891306 | 1.705617743  | 0.154012806 | 0.252072994 | RF01241    |
| ENSG00000143158 | 581.6706896 | 811.1187679 | -0.480119508 | 0.154047875 | 0.25211451  | MPC2       |
| novel.562       | 0.908699006 | 3.943154111 | -2.118583016 | 0.154096528 | 0.25217825  | -          |
| ENSG00000243667 | 116.4293787 | 150.4246988 | -0.36935955  | 0.154134712 | 0.25222485  | WDR92      |
| ENSG00000070831 | 4243.054102 | 5198.957696 | -0.293169838 | 0.1541897   | 0.252298942 | CDC42      |
| ENSG00000103485 | 741.140084  | 502.33783   | 0.561459423  | 0.154203568 | 0.252305743 | QPRT       |
| ENSG00000168827 | 522.3691124 | 738.0643192 | -0.499122304 | 0.154254151 | 0.252370944 | GFM1       |
| ENSG00000111540 | 2802.805342 | 2365.695782 | 0.244686479  | 0.154262844 | 0.252370944 | AC034102.1 |
| ENSG00000198911 | 3302.636477 | 2451.273574 | 0.430151958  | 0.154291881 | 0.252402553 | SREBF2     |
| ENSG00000116151 | 85.59608176 | 122.8082831 | -0.518816031 | 0.154380443 | 0.252531529 | MORN1      |
| ENSG00000111361 | 865.2420635 | 1119.614882 | -0.372104993 | 0.154429566 | 0.252595981 | EIF2B1     |
| ENSG00000095303 | 711.9389726 | 950.6255519 | -0.417032761 | 0.154486335 | 0.252672928 | PTGS1      |
| ENSG00000227347 | 1.789675198 | 6.471920532 | -1.846121763 | 0.154519158 | 0.252710704 | HNRNP KP2  |
| ENSG00000178146 | 7.911519374 | 16.21174359 | -1.03620894  | 0.154561684 | 0.252764343 | AL672207.1 |
| ENSG00000134046 | 1617.075559 | 1253.031259 | 0.367915777  | 0.154605003 | 0.252819271 | MBD2       |
| ENSG00000114383 | 545.7136838 | 704.0168325 | -0.367501604 | 0.154645389 | 0.252869397 | TUSC2      |
| ENSG00000279637 | 4.208669961 | 0.713078025 | 2.556537559  | 0.154659375 | 0.252876352 | AC018445.3 |
| ENSG00000133216 | 411.7086316 | 644.4505999 | -0.646076725 | 0.154791908 | 0.253077123 | EPHB2      |
| ENSG00000273274 | 6.722116008 | 1.069617038 | 2.646634073  | 0.154804056 | 0.253081058 | ZBTB8B     |
| ENSG00000225972 | 10.22721604 | 3.300895859 | 1.641527112  | 0.154829581 | 0.253106862 | MTND1P23   |
| ENSG00000262919 | 359.1671362 | 473.3783381 | -0.398866727 | 0.154880605 | 0.253174342 | CCNQ       |
| ENSG00000174226 | 2.741212075 | 0.387220594 | 2.825346279  | 0.154892478 | 0.253177821 | SNX31      |
| ENSG00000260034 | 5.408102518 | 12.74669894 | -1.230339466 | 0.154910816 | 0.253191867 | LCMT1-AS2  |
| ENSG00000256806 | 33.52859432 | 53.6039297  | -0.673415978 | 0.15500823  | 0.253335147 | C17orf100  |
| ENSG00000103126 | 803.7298841 | 639.7432229 | 0.329238191  | 0.155036087 | 0.253364736 | AXIN1      |
| ENSG00000111788 | 87.08109073 | 123.1140715 | -0.497467032 | 0.155097399 | 0.253448992 | AC009533.1 |
| ENSG00000249767 | 4.162071144 | 0.743759607 | 2.513787352  | 0.155196958 | 0.253595734 | ENPP7P10   |
| ENSG00000198691 | 28.6330788  | 7.970180625 | 1.838745707  | 0.155364002 | 0.253852722 | ABCA4      |
| ENSG00000262202 | 3.933051467 | 0.356539013 | 3.347656028  | 0.155376967 | 0.253857942 | AC007952.4 |
| ENSG00000153046 | 322.0538484 | 406.4414076 | -0.335706872 | 0.155388162 | 0.253860268 | CDYL       |
| ENSG00000260018 | 25.06716288 | 14.49285183 | 0.784263185  | 0.155461419 | 0.253963979 | AC040169.1 |
| ENSG00000244490 | 21.31298479 | 35.73743567 | -0.748448741 | 0.155502649 | 0.254015361 | RWDD4P1    |
| ENSG00000122376 | 399.2996034 | 514.1708193 | -0.365433827 | 0.155528078 | 0.254040928 | SHLD2      |
| ENSG00000231967 | 3.902821355 | 0.336469917 | 3.337354458  | 0.155593565 | 0.254131918 | AL135786.1 |
| ENSG00000252448 | 4.207416313 | 0.774441189 | 2.498621902  | 0.155621792 | 0.254162042 | RF00092    |
| ENSG00000232608 | 4.513264919 | 1.060160428 | 2.080394128  | 0.15566864  | 0.254222574 | TIMM9P2    |
| ENSG00000283761 | 5.102253911 | 1.467450118 | 1.816534956  | 0.155678553 | 0.254222784 | AC118553.2 |
| ENSG00000101109 | 924.660374  | 749.5812894 | 0.302811671  | 0.155711096 | 0.254248802 | STK4       |
| ENSG00000251787 | 3.065936683 | 0.356539013 | 2.985998574  | 0.155723754 | 0.254248802 | RNU7-47P   |
| ENSG00000279203 | 11.99418302 | 4.809640044 | 1.334139977  | 0.155723844 | 0.254248802 | AC005785.2 |
| ENSG00000075651 | 321.8340587 | 523.8940624 | -0.703003946 | 0.15574821  | 0.254272606 | PLD1       |
| novel.436       | 4.810266713 | 1.110911105 | 2.138296524  | 0.155759869 | 0.254275662 | -          |
| ENSG00000141371 | 3.052075276 | 0.387220594 | 2.980258701  | 0.155803763 | 0.254331338 | C17orf64   |
| ENSG00000137878 | 3.687734357 | 20.57241469 | -2.480030473 | 0.15582332  | 0.254347281 | GCOM1      |
| ENSG00000271584 | 0.616711807 | 6.412997513 | -3.390799594 | 0.155867718 | 0.254403768 | LINC02550  |
| ENSG00000139200 | 37.41142822 | 97.1947618  | -1.376583986 | 0.155907882 | 0.254453337 | PIANP      |
| ENSG00000138303 | 452.8179666 | 560.1516507 | -0.307358412 | 0.155926277 | 0.254467374 | ASCC1      |
| ENSG00000058600 | 57.40377527 | 31.72590193 | 0.852315914  | 0.155973218 | 0.254527993 | POLR3E     |

|                 |             |             |              |             |             |            |
|-----------------|-------------|-------------|--------------|-------------|-------------|------------|
| ENSG00000161813 | 925.8943124 | 1229.684286 | -0.409548508 | 0.156058133 | 0.254645047 | LARP4      |
| ENSG00000111305 | 1.788421549 | 6.268917821 | -1.808471784 | 0.156068198 | 0.254645047 | GSG1       |
| ENSG00000213380 | 204.4721776 | 268.3814999 | -0.393024734 | 0.156074351 | 0.254645047 | COG8       |
| ENSG00000243404 | 0.89358395  | 3.964379082 | -2.136254185 | 0.156135436 | 0.254728714 | RPL35AP32  |
| ENSG00000188886 | 3.065936683 | 0.336469917 | 2.986005189  | 0.156164274 | 0.254759764 | ASTL       |
| ENSG00000275325 | 3.997343909 | 0.336469917 | 3.369419296  | 0.156218462 | 0.254831428 | PDCD6IPP1  |
| ENSG00000231704 | 2.741212075 | 0.336469917 | 2.825359168  | 0.15622782  | 0.254831428 | AC004895.1 |
| ENSG00000278627 | 5.11486167  | 1.00940975  | 2.300393919  | 0.156486086 | 0.255226614 | AC005962.1 |
| ENSG00000227857 | 2.727350667 | 0.356539013 | 2.819218916  | 0.156489741 | 0.255226614 | AL358075.2 |
| ENSG00000268536 | 0.307102255 | 2.567748738 | -2.974396881 | 0.156502083 | 0.255230722 | AC005523.1 |
| ENSG00000255129 | 7.319951813 | 1.885352294 | 1.981508565  | 0.156564228 | 0.255316044 | AP000880.1 |
| ENSG00000259429 | 0.908699006 | 4.116631115 | -2.167873055 | 0.156591941 | 0.25534521  | UBE2Q2P2   |
| ENSG00000251593 | 8.860477683 | 20.20783173 | -1.188173356 | 0.156623931 | 0.255358048 | MSNP1      |
| ENSG00000006007 | 845.709848  | 1131.619803 | -0.420179175 | 0.1566317   | 0.255358048 | GDE1       |
| ENSG00000196757 | 227.8475653 | 159.6640787 | 0.5132108    | 0.156634874 | 0.255358048 | ZNF700     |
| ENSG00000141510 | 629.4498148 | 955.3757716 | -0.602300902 | 0.156639129 | 0.255358048 | TP53       |
| ENSG00000104856 | 413.7686266 | 587.8407062 | -0.50605191  | 0.156744039 | 0.255513043 | RELB       |
| ENSG00000135108 | 640.3536056 | 788.7161611 | -0.300288838 | 0.156763867 | 0.255529332 | FBXO21     |
| ENSG00000151365 | 3.044553384 | 0.356539013 | 2.977167087  | 0.156884827 | 0.255690899 | THRSP      |
| ENSG00000266304 | 0.293240848 | 2.567748738 | -2.974410742 | 0.15689251  | 0.255690899 | LIVAR      |
| ENSG00000245008 | 0.293240848 | 2.567748738 | -2.974410742 | 0.15689251  | 0.255690899 | AP001122.1 |
| ENSG00000106355 | 472.1048768 | 630.1583616 | -0.417099479 | 0.156953141 | 0.255773665 | LSM5       |
| ENSG00000185483 | 151.5471777 | 51.45387321 | 1.556814564  | 0.157014368 | 0.255846128 | ROR1       |
| ENSG00000047644 | 1077.641473 | 1326.607957 | -0.300020781 | 0.157018122 | 0.255846128 | WWC3       |
| ENSG00000108953 | 7.577947953 | 14.96022042 | -0.976287427 | 0.157027149 | 0.255846128 | YWHAE      |
| ENSG00000223576 | 0.601596751 | 3.32212083  | -2.451669703 | 0.157118922 | 0.255979602 | AL355001.1 |
| ENSG00000262585 | 2.72484337  | 0.336469917 | 2.818116695  | 0.157171447 | 0.256049119 | LINC01979  |
| ENSG00000259031 | 3.60707321  | 0.693008929 | 2.351774002  | 0.157187388 | 0.256059034 | AL845552.2 |
| ENSG00000271002 | 0.308355904 | 3.424906455 | -3.401972668 | 0.157270318 | 0.256178065 | AC129492.6 |
| ENSG00000178776 | 0.307102255 | 3.424906455 | -3.401971437 | 0.157301784 | 0.256213257 | C5orf46    |
| ENSG00000011677 | 11.06194942 | 1.345879667 | 3.017879819  | 0.157312639 | 0.256214874 | GABRA3     |
| ENSG00000240048 | 2.123246619 | 6.65498254  | -1.656022944 | 0.157346624 | 0.256254162 | DDX50P2    |
| ENSG00000174844 | 12.0697583  | 5.381078522 | 1.166149012  | 0.15736856  | 0.256270794 | DNAH12     |
| ENSG00000286089 | 3.887706299 | 0.356539013 | 3.332170504  | 0.157386428 | 0.256270794 | AC095057.4 |
| ENSG00000287011 | 3.887706299 | 0.356539013 | 3.332170504  | 0.157386428 | 0.256270794 | AC003077.1 |
| ENSG00000272366 | 3.825992426 | 0           | 4.271245158  | 0.157449155 | 0.256356865 | AL158211.3 |
| ENSG00000230202 | 1456.62124  | 1835.078588 | -0.333257359 | 0.157560506 | 0.25652209  | AL450405.1 |
| ENSG00000089472 | 624.8040619 | 289.2123508 | 1.110750271  | 0.157613448 | 0.256592205 | HEPH       |
| ENSG00000267934 | 6.859191699 | 2.10970837  | 1.691958532  | 0.15762995  | 0.25660299  | AC010300.1 |
| ENSG00000213189 | 39.22653275 | 59.47886725 | -0.603141373 | 0.157719273 | 0.256732312 | BTF3L4P2   |
| ENSG00000100354 | 795.5586316 | 590.1372475 | 0.431195304  | 0.157759351 | 0.256781463 | TNRC6B     |
| ENSG00000262265 | 3.296210009 | 8.580473026 | -1.376157098 | 0.157770004 | 0.256782714 | AC002558.3 |
| novel.1059      | 15.15457099 | 4.83099341  | 1.636892718  | 0.157885313 | 0.256954291 | -          |
| ENSG00000153237 | 29.5455391  | 8.788356026 | 1.739601759  | 0.157933353 | 0.257016376 | CCDC148    |
| ENSG00000188869 | 0.615458159 | 3.189937893 | -2.391053826 | 0.157949706 | 0.257026889 | TMC3       |
| ENSG00000260495 | 12.96341352 | 5.676254372 | 1.186612986  | 0.158001337 | 0.257094804 | AC009148.1 |
| ENSG00000279845 | 4.816606227 | 0.693008929 | 2.774701464  | 0.158046499 | 0.257148692 | AC097372.2 |
| ENSG00000142039 | 598.0355928 | 438.9141641 | 0.445575318  | 0.15805425  | 0.257148692 | CCDC97     |
| ENSG00000174669 | 67.76355096 | 95.17231192 | -0.488990585 | 0.158104528 | 0.257214385 | SLC29A2    |
| ENSG00000103769 | 2082.077528 | 2663.130303 | -0.355154654 | 0.158127384 | 0.257229699 | RAB11A     |
| ENSG00000231607 | 93.55043901 | 64.61449312 | 0.531865622  | 0.158137118 | 0.257229699 | DLEU2      |

|                 |             |             |              |             |             |            |
|-----------------|-------------|-------------|--------------|-------------|-------------|------------|
| ENSG00000248858 | 14.42578554 | 5.93000776  | 1.296308923  | 0.158143643 | 0.257229699 | AC104211.1 |
| ENSG00000179611 | 129.573959  | 176.2808002 | -0.444649226 | 0.15819813  | 0.257302218 | DGKZP1     |
| ENSG00000170959 | 7.206624528 | 1.426156051 | 2.333910905  | 0.158253126 | 0.257375554 | DCDC1      |
| ENSG00000145358 | 30.0134651  | 18.20103738 | 0.718793408  | 0.158343408 | 0.25749286  | DDIT4L     |
| ENSG00000189376 | 58.75582585 | 39.13743992 | 0.583548326  | 0.15835145  | 0.25749286  | C8orf76    |
| ENSG00000136319 | 267.1954736 | 343.3523542 | -0.362597332 | 0.158354987 | 0.25749286  | TTC5       |
| ENSG00000132952 | 588.4192907 | 482.4697255 | 0.286757744  | 0.158422172 | 0.257585984 | USPL1      |
| ENSG00000270533 | 5.201791061 | 1.436768536 | 1.853744719  | 0.158531327 | 0.257747335 | CR382285.1 |
| ENSG00000275066 | 70.84557161 | 43.07211772 | 0.721441283  | 0.158596741 | 0.257829059 | SYNRG      |
| ENSG00000231426 | 3.385646697 | 0           | 4.091951097  | 0.158634191 | 0.257829059 | FILNC1     |
| ENSG00000176134 | 3.385646697 | 0           | 4.091951097  | 0.158634191 | 0.257829059 | AL445665.1 |
| novel.455       | 3.385646697 | 0           | 4.091951097  | 0.158634191 | 0.257829059 | -          |
| ENSG00000203711 | 3.385646697 | 0           | 4.091951097  | 0.158634191 | 0.257829059 | C6orf99    |
| ENSG00000229994 | 14.21822044 | 23.86770675 | -0.744283056 | 0.158641135 | 0.257829059 | RPL5P4     |
| ENSG00000110888 | 1151.571551 | 798.7445884 | 0.527708962  | 0.158661592 | 0.257846177 | CAPRIN2    |
| ENSG00000272170 | 0.586481695 | 3.678659843 | -2.620807514 | 0.158694008 | 0.257871837 | AL355385.1 |
| ENSG00000260433 | 3.384393048 | 0           | 4.091444513  | 0.158707158 | 0.257871837 | LINC01917  |
| novel.973       | 3.384393048 | 0           | 4.091444513  | 0.158707158 | 0.257871837 | -          |
| ENSG00000156928 | 600.4493317 | 748.4939282 | -0.317901172 | 0.158748455 | 0.257922807 | MALSU1     |
| ENSG00000242375 | 12.76204539 | 5.451898296 | 1.232185154  | 0.15879073  | 0.2579664   | AL590705.3 |
| ENSG00000226393 | 8.087600719 | 1.682349583 | 2.237800363  | 0.158795144 | 0.2579664   | IFNA20P    |
| ENSG00000210140 | 3319.00623  | 2414.064674 | 0.459351506  | 0.158913246 | 0.258142118 | MT-TC      |
| ENSG00000272047 | 985.6508088 | 760.9719545 | 0.372812839  | 0.158978448 | 0.258231889 | GTF2H5     |
| ENSG00000153048 | 895.6107127 | 1170.785733 | -0.386696725 | 0.159006237 | 0.258260881 | CARHSP1    |
| ENSG00000036257 | 973.6641035 | 1181.361078 | -0.279134072 | 0.159282756 | 0.258693835 | CUL3       |
| ENSG00000279594 | 7.014174478 | 1.813376645 | 1.955285846  | 0.159366291 | 0.258813327 | AL049780.3 |
| ENSG00000224939 | 2.431602522 | 7.04335901  | -1.541915061 | 0.159416104 | 0.258856813 | LINC00184  |
| ENSG00000238181 | 3.549120283 | 0           | 4.162757255  | 0.159422958 | 0.258856813 | AHCYP2     |
| ENSG00000274759 | 3.549120283 | 0           | 4.162757255  | 0.159422958 | 0.258856813 | RNA5SP527  |
| ENSG00000137364 | 548.4851698 | 434.5604626 | 0.335218472  | 0.159435036 | 0.258860247 | TPMT       |
| ENSG00000176289 | 4.148209737 | 0.693008929 | 2.559331201  | 0.159456237 | 0.258875271 | IDSP1      |
| ENSG00000253485 | 16.34906022 | 8.611154608 | 0.924729734  | 0.159464217 | 0.258875271 | PCDHGA5    |
| ENSG00000279278 | 54.34216935 | 34.42467773 | 0.654966549  | 0.159482032 | 0.258888015 | AC245060.6 |
| ENSG00000068308 | 1544.701024 | 1915.796004 | -0.310475529 | 0.159511542 | 0.258919741 | OTUD5      |
| ENSG00000258881 | 8.812625217 | 2.0188195   | 2.098439528  | 0.159563726 | 0.258988265 | AC007040.2 |
| ENSG00000253661 | 13.05911845 | 36.14271758 | -1.471446936 | 0.159586691 | 0.259009359 | ZFHx4-AS1  |
| ENSG00000259985 | 17.39379473 | 8.020802909 | 1.121765541  | 0.159612549 | 0.25902434  | AC017100.1 |
| ENSG00000258424 | 20.94639123 | 10.10813043 | 1.054998608  | 0.159615861 | 0.25902434  | AL512791.1 |
| ENSG00000109065 | 655.1141731 | 811.4212861 | -0.308691842 | 0.159639848 | 0.259041648 | NAT9       |
| ENSG00000105072 | 147.6234716 | 111.5272361 | 0.4033577    | 0.159646468 | 0.259041648 | C19orf44   |
| ENSG00000236039 | 54.11319312 | 22.8440885  | 1.24796082   | 0.159699086 | 0.259110844 | AC019117.1 |
| ENSG00000043355 | 384.8802805 | 63.72849885 | 2.593878381  | 0.159722773 | 0.259114892 | ZIC2       |
| ENSG00000248873 | 2.755073482 | 8.387954407 | -1.607450264 | 0.159729287 | 0.259114892 | SERBP1P6   |
| ENSG00000166866 | 5.157699541 | 1.069617038 | 2.263934788  | 0.1597315   | 0.259114892 | MYO1A      |
| ENSG00000255303 | 3.928036872 | 0.713078025 | 2.45588445   | 0.159782593 | 0.259181591 | OR5BA1P    |
| ENSG00000232259 | 5.478663203 | 1.406086955 | 1.946578739  | 0.15984759  | 0.259270835 | AL158166.2 |
| ENSG00000154237 | 790.4884008 | 590.5065355 | 0.421237088  | 0.159936691 | 0.259399162 | LRRK1      |
| ENSG00000285736 | 2.976499995 | 0.387220594 | 2.948750302  | 0.159967354 | 0.259432699 | AC131025.3 |
| ENSG00000151917 | 143.1838875 | 106.0434192 | 0.4317487    | 0.160073347 | 0.259588392 | BEND6      |
| ENSG00000271664 | 12.04336041 | 5.166179057 | 1.235743836  | 0.160160072 | 0.259712821 | AC004890.3 |
| ENSG00000232926 | 2.666890443 | 8.621767093 | -1.683453909 | 0.160239014 | 0.259824616 | AC000078.1 |

|                 |             |             |              |             |             |            |
|-----------------|-------------|-------------|--------------|-------------|-------------|------------|
| ENSG00000228816 | 2.124500267 | 6.185045417 | -1.538673192 | 0.160251685 | 0.259828945 | AK3P5      |
| ENSG00000241131 | 3.386900346 | 0           | 4.092469241  | 0.160320248 | 0.259923892 | LINC02032  |
| ENSG00000226526 | 0           | 2.149846562 | -3.685908329 | 0.160334007 | 1           | AL049569.1 |
| ENSG00000242325 | 0           | 2.149846562 | -3.685908329 | 0.160334007 | 1           | RPS12P31   |
| ENSG00000173548 | 941.2177106 | 1373.551379 | -0.545131303 | 0.160394771 | 0.260028488 | SNX33      |
| ENSG00000258844 | 3.3831394   | 0           | 4.090948672  | 0.160540291 | 0.260199457 | AL162511.1 |
| ENSG00000283945 | 3.3831394   | 0           | 4.090948672  | 0.160540291 | 0.260199457 | LINC00032  |
| ENSG00000235832 | 3.3831394   | 0           | 4.090948672  | 0.160540291 | 0.260199457 | CNN2P3     |
| ENSG00000211789 | 3.3831394   | 0           | 4.090948672  | 0.160540291 | 0.260199457 | TRAV12-2   |
| ENSG00000223685 | 0.921306765 | 4.972632957 | -2.442060084 | 0.16060687  | 0.260291129 | LINC00571  |
| ENSG00000255538 | 2.975246347 | 0.356539013 | 2.948211724  | 0.160742834 | 0.260484101 | OR10V2P    |
| ENSG00000235376 | 1.232169966 | 5.176791542 | -2.073828573 | 0.160745991 | 0.260484101 | RPEL1      |
| ENSG00000138162 | 321.6524377 | 415.7145513 | -0.37050413  | 0.160792323 | 0.26054293  | TACC2      |
| ENSG00000157500 | 1057.009378 | 833.8782349 | 0.341883988  | 0.160843064 | 0.260608895 | APPL1      |
| ENSG00000121900 | 163.5319285 | 286.3678946 | -0.808846412 | 0.160894611 | 0.26067616  | TMEM54     |
| ENSG00000085662 | 4241.837529 | 7552.53069  | -0.832256321 | 0.160928272 | 0.260714438 | AKR1B1     |
| ENSG00000134644 | 1315.640039 | 1574.912417 | -0.259433119 | 0.161010569 | 0.260816867 | PUM1       |
| ENSG00000199476 | 5.132484024 | 1.00940975  | 2.305608448  | 0.161018259 | 0.260816867 | RF00019    |
| ENSG00000260698 | 12.51414971 | 4.993857928 | 1.32123092   | 0.161021614 | 0.260816867 | AL591848.3 |
| ENSG00000172809 | 4820.12458  | 6046.316435 | -0.327000853 | 0.161213643 | 0.26110695  | RPL38      |
| ENSG00000255561 | 40.83357362 | 25.16412001 | 0.694490696  | 0.161220804 | 0.26110695  | FDXACB1    |
| ENSG00000197614 | 145.2471276 | 829.3420137 | -2.513561742 | 0.161308104 | 0.261232054 | MFAP5      |
| ENSG00000230673 | 6.873053107 | 2.211209725 | 1.65498079   | 0.16132992  | 0.2612511   | PABPC1P3   |
| ENSG00000106993 | 378.0497287 | 303.8753623 | 0.314843477  | 0.161386086 | 0.261325765 | CDC37L1    |
| ENSG00000253958 | 3.60707321  | 0.723690511 | 2.326628614  | 0.161442519 | 0.261400852 | CLDN23     |
| ENSG00000125520 | 1302.499234 | 1713.091999 | -0.395436571 | 0.161472104 | 0.261432463 | SLC2A4RG   |
| ENSG00000173626 | 3.962027931 | 0.693008929 | 2.486839026  | 0.161570368 | 0.261575257 | TRAPPC3L   |
| ENSG00000262692 | 27.47863575 | 17.01802224 | 0.696181989  | 0.161582453 | 0.261578522 | AC116914.2 |
| ENSG00000112699 | 252.7543147 | 432.104023  | -0.774064452 | 0.161607438 | 0.261588952 | GMDS       |
| ENSG00000224855 | 4.133094681 | 0.356539013 | 3.421489319  | 0.161609033 | 0.261588952 | OPA1-AS1   |
| ENSG00000084734 | 1.84261353  | 9.037357519 | -2.298238216 | 0.161621276 | 0.261592473 | GCKR       |
| ENSG00000114735 | 522.1112303 | 644.9717454 | -0.304852761 | 0.16163911  | 0.261605041 | HEMK1      |
| novel.596       | 74.21717092 | 140.7955769 | -0.924178276 | 0.161691558 | 0.261673625 | -          |
| ENSG00000184575 | 2422.715923 | 3016.584983 | -0.316258338 | 0.161766252 | 0.261771851 | XPOT       |
| ENSG00000179010 | 6838.135572 | 8378.577592 | -0.293134309 | 0.161772404 | 0.261771851 | MRFAP1     |
| novel.804       | 70.24802054 | 47.59634249 | 0.558817907  | 0.1617918   | 0.261783977 | -          |
| ENSG00000266651 | 7.508640916 | 16.61086094 | -1.146135597 | 0.16180005  | 0.261783977 | AC093484.4 |
| ENSG00000069667 | 271.7474863 | 468.9960184 | -0.787155126 | 0.161832443 | 0.261820082 | RORA       |
| ENSG00000279530 | 5.058162392 | 1.110911105 | 2.210760312  | 0.161856326 | 0.261842416 | AC092881.2 |
| ENSG00000275719 | 7.892572101 | 2.598430319 | 1.620588061  | 0.161908143 | 0.261906204 | AC008622.2 |
| ENSG00000125352 | 267.291107  | 352.7811238 | -0.399982295 | 0.161915917 | 0.261906204 | RNF113A    |
| ENSG00000181004 | 159.033538  | 121.2125029 | 0.391831797  | 0.162033674 | 0.262080363 | BBS12      |
| ENSG00000075234 | 475.7427656 | 596.8125691 | -0.326932131 | 0.16218428  | 0.262307631 | TTC38      |
| ENSG00000089775 | 359.7115355 | 461.3678087 | -0.358579257 | 0.162247032 | 0.262392788 | ZBTB25     |
| ENSG00000275413 | 10.80359728 | 4.596024848 | 1.226933774  | 0.162389543 | 0.262606916 | AC002553.2 |
| ENSG00000204011 | 1.493927053 | 5.64557279  | -1.914969761 | 0.162413789 | 0.262627529 | COL5A1-AS1 |
| ENSG00000124097 | 3.88645265  | 0.723690511 | 2.434580627  | 0.162431335 | 0.262627529 | HMGB1P1    |
| ENSG00000267365 | 5.146345431 | 14.0773898  | -1.458489615 | 0.162432615 | 0.262627529 | KCNJ2-AS1  |
| ENSG00000132359 | 420.0663258 | 228.9681228 | 0.876280412  | 0.162470289 | 0.262672097 | RAP1GAP2   |
| ENSG00000228886 | 1.214547612 | 5.023383634 | -2.050216393 | 0.162550634 | 0.262785641 | AL138963.1 |
| ENSG00000227964 | 0.586481695 | 3.873490212 | -2.705896865 | 0.162604787 | 0.262849147 | LINC01429  |

|                 |             |             |              |             |             |            |
|-----------------|-------------|-------------|--------------|-------------|-------------|------------|
| ENSG00000185808 | 410.1445993 | 293.5190479 | 0.481760737  | 0.162610151 | 0.262849147 | PIGP       |
| ENSG00000111846 | 2.450478525 | 0           | 3.625269913  | 0.162618699 | 1           | GCNT2      |
| ENSG00000198049 | 3.31633966  | 0           | 4.063619493  | 0.162750788 | 0.263050907 | AVPR1B     |
| ENSG00000260781 | 2.744973021 | 9.733962468 | -1.833394068 | 0.162755218 | 0.263050907 | ARHGAP23P1 |
| ENSG00000213694 | 1150.410348 | 1775.147522 | -0.625908247 | 0.162844202 | 0.263178354 | S1PR3      |
| ENSG00000166821 | 155.9347214 | 114.1512109 | 0.451884676  | 0.162865221 | 0.263195951 | PEX11A     |
| novel.1054      | 11.5651914  | 4.158053576 | 1.45961195   | 0.162906093 | 0.263245628 | -          |
| ENSG00000260657 | 0.61420451  | 5.24773971  | -3.104816643 | 0.163005303 | 0.263374336 | AC107871.2 |
| novel.1063      | 61.90031583 | 114.1831428 | -0.882532722 | 0.163006017 | 0.263374336 | -          |
| ENSG00000249306 | 4.924918918 | 0.743759607 | 2.746777491  | 0.163077378 | 0.263456869 | LINC01411  |
| ENSG00000233684 | 4.924918918 | 0.743759607 | 2.746777491  | 0.163077378 | 0.263456869 | LINC01865  |
| ENSG00000183145 | 2.444210281 | 0           | 3.621918783  | 0.163108611 | 1           | RIPPLY3    |
| ENSG00000260840 | 2.444210281 | 0           | 3.621918783  | 0.163108611 | 1           | LINC01964  |
| ENSG00000274115 | 2.444210281 | 0           | 3.621918783  | 0.163108611 | 1           | MIR6081    |
| ENSG00000272501 | 7.708897593 | 0.693008929 | 3.459025952  | 0.163158447 | 0.263571449 | AL662844.4 |
| ENSG00000256280 | 2.742465724 | 0.356539013 | 2.825979783  | 0.163271377 | 0.26373748  | AP006289.1 |
| ENSG00000286550 | 10.74313705 | 4.045811341 | 1.423052031  | 0.163320984 | 0.263801211 | AL591002.1 |
| ENSG00000261588 | 0.293240848 | 2.537067156 | -2.96029953  | 0.163336167 | 0.263809335 | AC093249.4 |
| ENSG00000173542 | 960.7958109 | 751.3915839 | 0.354720524  | 0.163447258 | 0.263972352 | MOB1B      |
| ENSG00000265907 | 2.738704777 | 0.356539013 | 2.824314123  | 0.163497516 | 0.26403557  | AP000919.2 |
| ENSG00000253910 | 24.01511994 | 13.89073177 | 0.78532126   | 0.163506728 | 0.26403557  | PCDHGB2    |
| ENSG00000224163 | 2.464339932 | 9.180152941 | -1.900435261 | 0.16354501  | 0.264080977 | AC025594.1 |
| ENSG00000242485 | 1242.372851 | 1607.860124 | -0.3722431   | 0.163578096 | 0.264105963 | MRPL20     |
| ENSG00000273374 | 5.434571684 | 1.396630344 | 1.943360935  | 0.163580815 | 0.264105963 | AC069222.1 |
| ENSG00000196704 | 1113.742836 | 1352.705065 | -0.280284211 | 0.163639826 | 0.26418482  | AMZ2       |
| ENSG00000271380 | 13.36622071 | 4.891200698 | 1.439216022  | 0.163652717 | 0.264189216 | AL451085.2 |
| ENSG00000255399 | 0.601596751 | 4.117915384 | -2.778790817 | 0.163677913 | 0.264213473 | TBX5-AS1   |
| ENSG00000250130 | 0.586481695 | 3.566546002 | -2.58328458  | 0.163707223 | 0.264244369 | AC090519.1 |
| ENSG00000134853 | 723.3109231 | 1919.746683 | -1.408256294 | 0.16371865  | 0.264246397 | PDGFRA     |
| ENSG00000143578 | 128.1450799 | 165.3214199 | -0.367700398 | 0.163747396 | 0.264276376 | CREB3L4    |
| ENSG00000260988 | 4.41372777  | 0.336469917 | 3.516212859  | 0.163841401 | 0.264411667 | AC090260.1 |
| ENSG00000102738 | 325.7779824 | 407.1498281 | -0.321425196 | 0.16392492  | 0.264530021 | MRPS31     |
| ENSG00000126945 | 1428.526978 | 1710.425956 | -0.259861328 | 0.163960442 | 0.264570912 | HNRNPH2    |
| ENSG00000213777 | 5.421963925 | 1.456837632 | 1.906074885  | 0.163973909 | 0.26457621  | AC011487.1 |
| novel.557       | 1.835020366 | 6.959486606 | -1.924115899 | 0.164072339 | 0.264718589 | -          |
| ENSG00000178425 | 377.3965029 | 573.2017322 | -0.60311128  | 0.164104106 | 0.264738008 | NT5DC1     |
| ENSG00000235904 | 41.95506579 | 21.49735692 | 0.957224687  | 0.164137142 | 0.264738008 | RBMS3-AS3  |
| ENSG00000246084 | 3.388153995 | 0           | 4.093001696  | 0.164140087 | 0.264738008 | LINC02325  |
| ENSG00000224177 | 3.388153995 | 0           | 4.093001696  | 0.164140087 | 0.264738008 | LINC00570  |
| novel.61        | 3.322679175 | 0           | 4.066238665  | 0.164145513 | 0.264738008 | -          |
| ENSG00000267084 | 3.322679175 | 0           | 4.066238665  | 0.164145513 | 0.264738008 | AC015802.2 |
| ENSG00000107938 | 289.0614194 | 356.0007155 | -0.300751514 | 0.164227527 | 0.264853841 | EDRF1      |
| ENSG00000087903 | 122.7616947 | 83.16492466 | 0.560882756  | 0.164245704 | 0.264866714 | RFX2       |
| ENSG00000103742 | 70.74438067 | 203.7329262 | -1.525984412 | 0.164269206 | 0.264888173 | IGDCC4     |
| novel.793       | 8.607282675 | 27.26971878 | -1.65770788  | 0.164283324 | 0.264894498 | -          |
| ENSG00000189326 | 0           | 3.005720009 | -4.16469794  | 0.164324018 | 0.26492723  | SPANXN4    |
| ENSG00000253477 | 0           | 3.005720009 | -4.16469794  | 0.164324018 | 0.26492723  | AC012213.1 |
| ENSG00000166664 | 3.381885751 | 0           | 4.090464471  | 0.164510922 | 0.265208994 | CHRFAM7A   |
| ENSG00000174963 | 157.7802246 | 63.7718007  | 1.305789737  | 0.164519201 | 0.265208994 | ZIC4       |
| ENSG00000286753 | 12.48266595 | 4.872287477 | 1.343176571  | 0.164605295 | 0.265322822 | AC091978.1 |
| ENSG00000132313 | 613.7685816 | 778.7152086 | -0.343789839 | 0.164610237 | 0.265322822 | MRPL35     |

|                 |             |             |              |             |             |             |
|-----------------|-------------|-------------|--------------|-------------|-------------|-------------|
| ENSG00000287562 | 61.32644189 | 34.32291959 | 0.839476733  | 0.164627872 | 0.265334785 | AL109615.4  |
| ENSG00000162994 | 221.9376727 | 151.9753793 | 0.547297625  | 0.164661037 | 0.265371776 | CLHC1       |
| ENSG00000258412 | 0           | 2.975038428 | -4.150816542 | 0.164732334 | 0.265470213 | AL355102.1  |
| ENSG00000228828 | 5.497539206 | 1.487519214 | 1.906580072  | 0.1647836   | 0.265536358 | TLK2P2      |
| ENSG00000223313 | 6.640272484 | 1.548882377 | 2.13947214   | 0.164847696 | 0.265623169 | RNU6-516P   |
| ENSG00000228253 | 690.738221  | 1047.030129 | -0.600106108 | 0.164910536 | 0.265707947 | MT-ATP8     |
| ENSG00000086061 | 2680.2844   | 3614.662799 | -0.431555292 | 0.164928587 | 0.265720552 | DNAJA1      |
| ENSG00000254352 | 16.58399213 | 5.522718069 | 1.595309657  | 0.165021566 | 0.265853866 | AC100854.1  |
| ENSG00000279977 | 0.616711807 | 3.832196145 | -2.653601533 | 0.165073282 | 0.265920693 | AC008764.10 |
| ENSG00000273419 | 6.581065908 | 2.180528143 | 1.604291741  | 0.165108523 | 0.265960973 | AC004877.1  |
| ENSG00000182223 | 2.697120555 | 0.387220594 | 2.805685208  | 0.165212519 | 0.266111993 | ZAR1        |
| ENSG00000249159 | 4.204909015 | 0.774441189 | 2.49584611   | 0.165268699 | 0.266185982 | AC091965.1  |
| ENSG00000226604 | 0.921306765 | 4.697526203 | -2.357060728 | 0.165367061 | 0.266327895 | PAPPA-AS2   |
| ENSG00000254389 | 6.667995298 | 2.466247382 | 1.421540328  | 0.16555979  | 0.266621763 | RHPN1-AS1   |
| ENSG00000183054 | 10.5481797  | 4.208804254 | 1.314562858  | 0.165579522 | 0.266637013 | RGPD6       |
| ENSG00000233806 | 0.615458159 | 3.790773684 | -2.622151847 | 0.165624037 | 0.266692166 | LINC01237   |
| ENSG00000135537 | 68.909005   | 97.49260023 | -0.503226244 | 0.165688136 | 0.266778846 | AFG1L       |
| ENSG00000066933 | 808.7408073 | 606.9110542 | 0.414439736  | 0.165752716 | 0.26686629  | MYO9A       |
| ENSG00000166169 | 416.8888262 | 509.4432409 | -0.288812813 | 0.165784162 | 0.266893769 | POLL        |
| ENSG00000170899 | 575.8638415 | 432.9390095 | 0.410863773  | 0.165790329 | 0.266893769 | GSTA4       |
| ENSG00000116748 | 3.699017196 | 0           | 4.219778262  | 0.165890689 | 0.267038785 | AMPD1       |
| ENSG00000141933 | 320.5382967 | 252.5829065 | 0.343324684  | 0.165927497 | 0.267081488 | TPGS1       |
| ENSG00000270462 | 4.763667895 | 1.029478846 | 2.182907204  | 0.165941569 | 0.267087591 | AC005034.2  |
| ENSG00000165807 | 18.12229544 | 9.457571445 | 0.945052933  | 0.165999803 | 0.267114624 | PPP1R36     |
| ENSG00000154889 | 393.9643982 | 276.6618352 | 0.509023958  | 0.166001631 | 0.267114624 | MPPE1       |
| ENSG00000286524 | 5.682467363 | 0.672939833 | 3.04377996   | 0.166028897 | 0.267114624 | AC092567.2  |
| ENSG00000237781 | 20.03393127 | 8.844967294 | 1.176369058  | 0.166031287 | 0.267114624 | AL356356.1  |
| ENSG00000184185 | 17.53853451 | 58.7000125  | -1.742755988 | 0.166034886 | 0.267114624 | KCNJ12      |
| ENSG00000233090 | 3.970874743 | 0.672939833 | 2.511201948  | 0.166039299 | 0.267114624 | AC015922.1  |
| ENSG00000186166 | 2.697120555 | 0.356539013 | 2.805672608  | 0.166040614 | 0.267114624 | CCDC84      |
| ENSG00000235613 | 2.697120555 | 0.356539013 | 2.805672608  | 0.166040614 | 0.267114624 | NSRP1P1     |
| ENSG00000178691 | 669.7696907 | 824.8724449 | -0.300510871 | 0.16626982  | 0.267466795 | SUZ12       |
| ENSG00000105755 | 250.5749115 | 339.6775819 | -0.438433065 | 0.166306722 | 0.267498043 | ETHE1       |
| ENSG00000155008 | 309.2118264 | 384.5763041 | -0.314647693 | 0.166313206 | 0.267498043 | APOOL       |
| ENSG00000106633 | 40.15410776 | 60.13284669 | -0.583169923 | 0.166320133 | 0.267498043 | GCK         |
| ENSG00000250899 | 118.4204933 | 69.62880533 | 0.763519305  | 0.166348023 | 0.267526338 | AC125807.2  |
| ENSG00000237575 | 8.489154257 | 2.894762044 | 1.556672144  | 0.166401933 | 0.267584108 | PYY2        |
| ENSG00000269934 | 16.15027066 | 27.78976428 | -0.787090221 | 0.166404543 | 0.267584108 | AL353593.1  |
| ENSG00000274721 | 2.139615324 | 6.653698271 | -1.634046561 | 0.166518755 | 0.267751192 | RF02039     |
| ENSG00000225127 | 3.686480708 | 0           | 4.215089094  | 0.166555689 | 0.267777435 | LINC00237   |
| ENSG00000275465 | 3.686480708 | 0           | 4.215089094  | 0.166555689 | 0.267777435 | AL449403.2  |
| ENSG00000175093 | 8.630204358 | 1.00940975  | 3.070382874  | 0.166576343 | 0.26779407  | SPSB4       |
| ENSG00000185900 | 33.58153266 | 49.64823654 | -0.565240365 | 0.166621519 | 0.267825696 | POMK        |
| novel.923       | 3.685155788 | 0           | 4.214581683  | 0.166626941 | 0.267825696 | -           |
| ENSG00000228423 | 3.685155788 | 0           | 4.214581683  | 0.166626941 | 0.267825696 | AL357552.2  |
| ENSG00000169020 | 607.5318996 | 423.5853333 | 0.520655945  | 0.166647884 | 0.267842788 | ATP5ME      |
| ENSG00000287826 | 3.281094953 | 0           | 4.049007545  | 0.166697642 | 0.267906187 | AC090994.1  |
| ENSG00000187678 | 1640.23023  | 2723.720128 | -0.731736791 | 0.166753669 | 0.267979655 | SPRY4       |
| ENSG00000240045 | 2.125753916 | 0           | 3.421194371  | 0.166763828 | 1           | STRIT1      |
| ENSG00000205669 | 2.125753916 | 0           | 3.421194371  | 0.166763828 | 1           | ACOT6       |
| ENSG00000223675 | 2.125753916 | 0           | 3.421194371  | 0.166763828 | 1           | AC093117.1  |

|                 |             |             |              |             |             |            |
|-----------------|-------------|-------------|--------------|-------------|-------------|------------|
| ENSG00000225715 | 2.125753916 | 0           | 3.421194371  | 0.166763828 | 1           | AL512504.1 |
| ENSG00000252367 | 2.125753916 | 0           | 3.421194371  | 0.166763828 | 1           | RF00019    |
| ENSG00000286112 | 8.854209439 | 3.546476906 | 1.310605354  | 0.166776316 | 0.267999473 | AL441992.2 |
| ENSG00000104320 | 1054.326749 | 841.7051534 | 0.324694698  | 0.166828149 | 0.268066185 | NBN        |
| ENSG00000129451 | 2.124500267 | 0           | 3.420446079  | 0.166879726 | 1           | KLK10      |
| ENSG00000167759 | 2.124500267 | 0           | 3.420446079  | 0.166879726 | 1           | KLK13      |
| ENSG00000206869 | 2.124500267 | 0           | 3.420446079  | 0.166879726 | 1           | SNORA70F   |
| ENSG00000286932 | 2.124500267 | 0           | 3.420446079  | 0.166879726 | 1           | AC013716.1 |
| ENSG00000256937 | 2.124500267 | 0           | 3.420446079  | 0.166879726 | 1           | KRT17P8    |
| ENSG00000214546 | 2.124500267 | 0           | 3.420446079  | 0.166879726 | 1           | AC087491.1 |
| ENSG00000181109 | 2.124500267 | 0           | 3.420446079  | 0.166879726 | 1           | OR52P1P    |
| ENSG00000286625 | 2.124500267 | 0           | 3.420446079  | 0.166879726 | 1           | AC113370.1 |
| ENSG00000287087 | 2.124500267 | 0           | 3.420446079  | 0.166879726 | 1           | AC025175.2 |
| ENSG00000162409 | 153.4248228 | 96.12344063 | 0.672942104  | 0.166886332 | 0.268129743 | PRKAA2     |
| ENSG00000232043 | 4.836735879 | 10.52603261 | -1.117293776 | 0.166888344 | 0.268129743 | AL133230.1 |
| ENSG00000271424 | 3.899060409 | 0.672939833 | 2.487859173  | 0.166920094 | 0.268147589 | AL157791.2 |
| ENSG00000237972 | 3.899060409 | 0.672939833 | 2.487859173  | 0.166920094 | 0.268147589 | TUBG1P     |
| ENSG00000161149 | 10.28391532 | 3.567701877 | 1.525326664  | 0.166932302 | 0.26815062  | TUBA3FP    |
| ENSG00000155393 | 441.3938253 | 565.8793924 | -0.358750331 | 0.166964246 | 0.268169007 | HEATR3     |
| ENSG00000198837 | 1412.619208 | 1086.033034 | 0.379573099  | 0.166964392 | 0.268169007 | DENND4B    |
| ENSG00000273983 | 0.308355904 | 2.476859868 | -2.931357034 | 0.167025551 | 0.268250655 | HIST1H3G   |
| ENSG00000233461 | 26.6858426  | 51.43846197 | -0.943520232 | 0.167075845 | 0.268314842 | AL445524.1 |
| ENSG00000162521 | 1760.802402 | 2076.58518  | -0.237994119 | 0.167092441 | 0.26832491  | RBBP4      |
| ENSG00000248477 | 3.85371524  | 0.387220594 | 3.320360635  | 0.167184762 | 0.268444747 | AC139495.1 |
| ENSG00000228315 | 142.0713566 | 86.61532844 | 0.71566047   | 0.167189774 | 0.268444747 | GUSBP11    |
| ENSG00000272597 | 6.095375011 | 1.783850939 | 1.768125101  | 0.167198064 | 0.268444747 | AC063944.3 |
| ENSG00000279392 | 6.009699269 | 12.19892558 | -1.017602046 | 0.167223573 | 0.268469112 | AL158801.5 |
| ENSG00000249304 | 0.293240848 | 3.404837359 | -3.393932016 | 0.167242333 | 0.26848264  | AC104779.1 |
| ENSG00000160999 | 52.76758115 | 87.48374094 | -0.72700532  | 0.167287879 | 0.268539165 | SH2B2      |
| ENSG00000265912 | 5.375365108 | 1.080229524 | 2.31903459   | 0.167313588 | 0.268563841 | AC037487.1 |
| ENSG00000148386 | 3.671365652 | 0           | 4.209405242  | 0.167363665 | 0.268627626 | LCN9       |
| ENSG00000251720 | 4.469173399 | 0.713078025 | 2.64470672   | 0.16746362  | 0.268764201 | RNU7-123P  |
| ENSG00000109625 | 10.46780329 | 2.079026788 | 2.318779461  | 0.167469445 | 0.268764201 | CPZ        |
| ENSG00000145919 | 819.3852023 | 1053.779684 | -0.362783825 | 0.16750443  | 0.268803742 | BOD1       |
| ENSG00000221926 | 156.1511608 | 251.7120886 | -0.688394376 | 0.167561286 | 0.268878375 | TRIM16     |
| ENSG00000250471 | 2.15473038  | 6.857985251 | -1.677315315 | 0.167605715 | 0.268933058 | GMPSP1     |
| ENSG00000248905 | 10.57339522 | 23.68947785 | -1.161352488 | 0.167695739 | 0.269051181 | FMN1       |
| ENSG00000233058 | 43.84671417 | 89.12590515 | -1.022293406 | 0.167700043 | 0.269051181 | LINC00884  |
| ENSG00000275454 | 17.83414046 | 10.01839744 | 0.830981249  | 0.167729821 | 0.26907755  | AC105020.6 |
| ENSG00000169045 | 909.3859672 | 708.8002042 | 0.359276805  | 0.167749854 | 0.26907755  | HNRNPH1    |
| ENSG00000224790 | 17.73084236 | 8.46005845  | 1.061972518  | 0.167753816 | 0.26907755  | AP000704.1 |
| ENSG00000287032 | 4.797658954 | 0.743759607 | 2.712293674  | 0.167757906 | 0.26907755  | AC018647.3 |
| ENSG00000221819 | 2.962638588 | 9.416277378 | -1.658322616 | 0.167886446 | 0.269267101 | GAS8-AS1   |
| ENSG00000092345 | 0           | 3.036401591 | -4.178584139 | 0.167991    | 0.269401529 | DAZL       |
| ENSG00000199038 | 0           | 3.036401591 | -4.178584139 | 0.167991    | 0.269401529 | MIR210     |
| ENSG00000283752 | 3.857476187 | 0.336469917 | 3.321647136  | 0.168084299 | 0.269534512 | AC241585.3 |
| ENSG00000074276 | 2.128261214 | 8.406996022 | -1.987047366 | 0.168095221 | 0.269535391 | CDHR2      |
| ENSG00000287264 | 9.117220175 | 3.944309986 | 1.207373366  | 0.168117602 | 0.269554642 | AP003778.1 |
| ENSG00000286373 | 9.969219902 | 4.382281258 | 1.196699001  | 0.168136246 | 0.269567899 | AC022387.2 |
| ENSG00000184414 | 2.11063886  | 0           | 3.412101969  | 0.168172891 | 1           | IRS3P      |
| ENSG00000224016 | 2.11063886  | 0           | 3.412101969  | 0.168172891 | 1           | AC092681.1 |



|                 |             |             |              |             |             |                |
|-----------------|-------------|-------------|--------------|-------------|-------------|----------------|
| ENSG00000186439 | 2.11063886  | 0           | 3.412101969  | 0.168172891 | 1           | TRDN           |
| ENSG00000254226 | 2.11063886  | 0           | 3.412101969  | 0.168172891 | 1           | LINC01933      |
| ENSG00000238194 | 2.11063886  | 0           | 3.412101969  | 0.168172891 | 1           | AL121908.1     |
| ENSG00000235026 | 2.11063886  | 0           | 3.412101969  | 0.168172891 | 1           | DPP10-AS1      |
| ENSG00000076321 | 524.6595935 | 393.0495904 | 0.415858857  | 0.168278285 | 0.269778978 | KLHL20         |
| ENSG00000216809 | 9.333632093 | 3.944309986 | 1.243941395  | 0.168378476 | 0.269922946 | AL589993.1     |
| ENSG00000207574 | 0           | 3.188782018 | -4.255399052 | 0.168410883 | 0.26995824  | MIR661         |
| ENSG00000147889 | 1973.512819 | 1077.411919 | 0.873331377  | 0.168506714 | 0.270089757 | CDKN2A         |
| ENSG00000259343 | 5.190436951 | 13.23542089 | -1.349055132 | 0.16851372  | 0.270089757 | TMC3-AS1       |
| novel.1032      | 22.00903283 | 39.54930593 | -0.845955371 | 0.168569753 | 0.270162899 | -              |
| ENSG00000110931 | 1040.097289 | 1253.987863 | -0.269847284 | 0.168687693 | 0.270335243 | CAMKK2         |
| ENSG00000280780 | 2.374903244 | 0           | 3.58423893   | 0.168692724 | 1           | JAKMIP2-AS1    |
| ENSG00000287631 | 2.374903244 | 0           | 3.58423893   | 0.168692724 | 1           | AC005071.1     |
| ENSG00000177076 | 29.33253212 | 17.34272379 | 0.760775661  | 0.168725337 | 0.270378892 | ACER2          |
| ENSG00000164031 | 971.9785694 | 772.7959155 | 0.330716129  | 0.168738575 | 0.270383428 | DNAJB14        |
| ENSG00000054148 | 2457.623129 | 1908.649371 | 0.364762442  | 0.168774046 | 0.270423589 | PHPT1          |
| ENSG00000138463 | 212.0511658 | 272.8031014 | -0.364099247 | 0.16879134  | 0.270434621 | SLC49A4        |
| ENSG00000271817 | 5.406848869 | 1.406086955 | 1.930660067  | 0.168815382 | 0.270456462 | RF00012        |
| ENSG00000224888 | 18.14751096 | 9.353758339 | 0.957085839  | 0.168841054 | 0.270480911 | AC138028.2     |
| ENSG00000171016 | 210.2342663 | 258.1348464 | -0.295919555 | 0.168864819 | 0.270502303 | PYGO1          |
| ENSG00000026036 | 54.17143078 | 89.12556682 | -0.716823166 | 0.16896331  | 0.270643388 | RTEL1-TNFRSF6B |
| ENSG00000270116 | 2.094270155 | 6.777708867 | -1.689701797 | 0.168999429 | 0.270684555 | AP001429.1     |
| ENSG00000271579 | 0.61420451  | 5.298361994 | -3.110597696 | 0.1690328   | 0.270708395 | AC078880.3     |
| ENSG00000151576 | 344.7673213 | 432.8261593 | -0.3285073   | 0.169035152 | 0.270708395 | QTRT2          |
| ENSG00000151332 | 417.8138794 | 283.6728432 | 0.558038684  | 0.169106261 | 0.270805583 | MBIP           |
| ENSG00000232202 | 4.006119451 | 0.387220594 | 3.372493454  | 0.169117775 | 0.270807329 | AC098824.1     |
| ENSG00000268499 | 1.200686205 | 5.216929734 | -2.106750769 | 0.169141684 | 0.270828923 | AC011479.2     |
| ENSG00000287200 | 11.66472855 | 4.320918095 | 1.431935691  | 0.169228005 | 0.27095044  | AC022506.2     |
| ENSG00000287707 | 1.846374476 | 6.309056013 | -1.786605029 | 0.169263904 | 0.270991218 | AC115284.4     |
| ENSG00000255503 | 7.151178898 | 2.211209725 | 1.710931061  | 0.16934549  | 0.271105131 | AP001767.3     |
| novel.243       | 5.802134163 | 12.1481749  | -1.07154546  | 0.169359152 | 0.271106395 | -              |
| ENSG00000258083 | 5.864816951 | 0           | 4.886642466  | 0.169367149 | 0.271106395 | OR9A4          |
| ENSG00000279232 | 5.088392504 | 1.436768536 | 1.827621369  | 0.169703711 | 0.271616101 | AC008522.1     |
| ENSG00000170631 | 169.684446  | 127.7883177 | 0.409942712  | 0.169712373 | 0.271616101 | ZNF16          |
| ENSG00000106610 | 201.2539793 | 251.0164764 | -0.319536387 | 0.169716939 | 0.271616101 | STAG3L4        |
| ENSG00000151702 | 665.1205433 | 447.5713519 | 0.57125841   | 0.169748206 | 0.271649409 | FLI1           |
| ENSG00000109680 | 147.2557666 | 201.4785556 | -0.453586471 | 0.169910798 | 0.271885056 | TBC1D19        |
| ENSG00000273925 | 2.755073482 | 0.387220594 | 2.831718339  | 0.169916387 | 0.271885056 | AC084757.4     |
| ENSG00000276523 | 11.97781432 | 5.023383634 | 1.255409796  | 0.169953013 | 0.271897913 | AC025287.3     |
| ENSG00000185156 | 4.851850935 | 1.00940975  | 2.222622332  | 0.169954401 | 0.271897913 | MFSD6L         |
| ENSG00000165392 | 320.7136943 | 414.1980199 | -0.369482437 | 0.169955818 | 0.271897913 | WRN            |
| novel.510       | 4.006119451 | 0.336469917 | 3.372502999  | 0.17011018  | 0.272111902 | -              |
| ENSG00000224858 | 59.04705795 | 95.64353332 | -0.696583467 | 0.170110524 | 0.272111902 | RPL29P11       |
| ENSG00000100926 | 3.369277992 | 8.75395003  | -1.378578914 | 0.17021818  | 0.272267349 | TM9SF1         |
| novel.1024      | 5.85876217  | 0           | 4.883791691  | 0.17034878  | 0.272459472 | -              |
| ENSG00000173077 | 5.195522817 | 1.10029862  | 2.250493006  | 0.170416611 | 0.272551182 | 1-Dec          |
| ENSG00000163755 | 556.3313287 | 823.4605536 | -0.565410243 | 0.17043283  | 0.272560345 | HPS3           |
| ENSG00000134058 | 30.30036643 | 52.58202808 | -0.797451023 | 0.170491442 | 0.272637296 | CDK7           |
| ENSG00000214803 | 3.692748952 | 0.356539013 | 3.254857312  | 0.170503896 | 0.272640432 | AC090921.1     |
| ENSG00000150779 | 621.3869589 | 901.5695971 | -0.537314119 | 0.170664633 | 0.272880659 | TIMM8B         |
| ENSG00000186162 | 201.114325  | 255.2055499 | -0.342921983 | 0.170686091 | 0.272898173 | CIDECP1        |

|                 |             |             |              |             |             |            |
|-----------------|-------------|-------------|--------------|-------------|-------------|------------|
| ENSG00000258010 | 0           | 2.996263399 | -4.160399515 | 0.17073205  | 0.272923647 | AC016705.1 |
| ENSG00000156239 | 346.561968  | 256.0108951 | 0.435749013  | 0.170732381 | 0.272923647 | N6AMT1     |
| ENSG00000146830 | 2223.346858 | 1606.510139 | 0.46895636   | 0.170733537 | 0.272923647 | GIGYF1     |
| ENSG00000152977 | 1320.091742 | 325.9140493 | 2.017940308  | 0.170758546 | 0.272946831 | ZIC1       |
| ENSG00000164627 | 22.65722839 | 10.83297682 | 1.064911597  | 0.17078075  | 0.272965529 | KIF6       |
| ENSG00000162869 | 466.9231441 | 373.5501195 | 0.322465557  | 0.17085603  | 0.273059585 | PPP1R21    |
| ENSG00000260996 | 4.562371034 | 1.029478846 | 2.115245574  | 0.170860616 | 0.273059585 | BX255925.1 |
| ENSG00000175906 | 289.6227409 | 478.7959338 | -0.725005721 | 0.170910257 | 0.273122117 | ARL4D      |
| ENSG00000204666 | 6.084020901 | 1.844058227 | 1.737439898  | 0.170933673 | 0.273142736 | AC010624.1 |
| ENSG00000272655 | 51.46477923 | 69.4724437  | -0.43353518  | 0.170955818 | 0.273161322 | POLR2J4    |
| ENSG00000107745 | 1115.662191 | 884.5431204 | 0.334646608  | 0.171057054 | 0.273306274 | MICU1      |
| ENSG00000080603 | 69.6335313  | 100.3137984 | -0.525146668 | 0.171151424 | 0.273440238 | SRCAP      |
| ENSG00000277304 | 0.908699006 | 3.61729668  | -1.990728199 | 0.17117569  | 0.273462191 | AC142086.6 |
| ENSG00000163463 | 75.8642298  | 117.2597638 | -0.626925641 | 0.171191514 | 0.273470654 | KRTCAP2    |
| ENSG00000204091 | 3.389407643 | 0           | 4.093555618  | 0.171240534 | 0.273499936 | TDRG1      |
| ENSG00000229214 | 3.389407643 | 0           | 4.093555618  | 0.171240534 | 0.273499936 | LINC00242  |
| ENSG00000264290 | 14.98830537 | 6.562809401 | 1.199452425  | 0.171241425 | 0.273499936 | AC104564.3 |
| ENSG00000230894 | 2.755073482 | 0.336469917 | 2.831738336  | 0.17125973  | 0.273512358 | AL133284.1 |
| ENSG00000271357 | 3.270994492 | 0           | 4.044759658  | 0.171296482 | 0.273554237 | AC048344.3 |
| novel.458       | 62.99486847 | 92.5290387  | -0.554782147 | 0.171308221 | 0.27355617  | -          |
| novel.275       | 16.86644834 | 6.64552593  | 1.333968171  | 0.171359056 | 0.273613587 | -          |
| ENSG00000251143 | 17.65652073 | 7.274731551 | 1.284600963  | 0.171365239 | 0.273613587 | AP002490.1 |
| ENSG00000132549 | 757.5085507 | 589.3775625 | 0.362238304  | 0.171382945 | 0.273625041 | VPS13B     |
| novel.1039      | 2.44546393  | 9.918180352 | -2.02825361  | 0.171440806 | 0.273700602 | -          |
| ENSG00000251139 | 3.267233545 | 0           | 4.043189598  | 0.171533819 | 0.273781801 | AC084871.1 |
| ENSG00000259219 | 3.267233545 | 0           | 4.043189598  | 0.171533819 | 0.273781801 | AC084855.2 |
| ENSG00000232433 | 3.267233545 | 0           | 4.043189598  | 0.171533819 | 0.273781801 | GXYLT1P3   |
| ENSG00000287433 | 3.267233545 | 0           | 4.043189598  | 0.171533819 | 0.273781801 | AC107222.2 |
| ENSG00000014257 | 39.81928269 | 21.85705959 | 0.872285111  | 0.17168153  | 0.274000727 | ACPP       |
| ENSG00000104472 | 463.461424  | 569.3420182 | -0.296358117 | 0.171759124 | 0.274107727 | CHRAC1     |
| ENSG00000229240 | 3.380632102 | 0           | 4.089996195  | 0.171769747 | 0.274107843 | LINC00710  |
| ENSG00000133997 | 263.8481202 | 339.8473001 | -0.36501803  | 0.171817802 | 0.27416769  | MED6       |
| ENSG00000103037 | 273.1384879 | 192.9616762 | 0.500407977  | 0.171880651 | 0.2742458   | SETD6      |
| ENSG00000215271 | 217.8455646 | 299.4233231 | -0.457773643 | 0.171889992 | 0.2742458   | HOMEZ      |
| ENSG00000137628 | 728.2110624 | 947.8246665 | -0.380137549 | 0.17189842  | 0.2742458   | DDX60      |
| ENSG00000178381 | 396.3188881 | 289.0194345 | 0.454996767  | 0.171938266 | 0.274292527 | ZFAND2A    |
| ENSG00000283498 | 72.69083463 | 96.79561009 | -0.412585467 | 0.171990166 | 0.27434802  | MIR1244-2  |
| novel.180       | 11.71988945 | 5.084746798 | 1.212007357  | 0.171994171 | 0.27434802  | -          |
| ENSG00000151366 | 485.2412511 | 373.5070404 | 0.377276832  | 0.172177762 | 0.274624006 | NDUFC2     |
| ENSG00000255537 | 6.625157428 | 2.058957692 | 1.660226689  | 0.172362372 | 0.274901584 | AP000708.1 |
| ENSG00000142188 | 55.59203294 | 113.8326736 | -1.035115    | 0.172403339 | 0.274950043 | TMEM50B    |
| ENSG00000229474 | 44.53259082 | 24.37290178 | 0.875374196  | 0.172428803 | 0.274973774 | PATL2      |
| ENSG00000145882 | 484.6601282 | 368.8263725 | 0.393947781  | 0.172442219 | 0.27497829  | PCYOX1L    |
| ENSG00000104231 | 414.8182614 | 526.0502147 | -0.342975417 | 0.172472332 | 0.27500943  | ZFAND1     |
| ENSG00000224885 | 2.753819833 | 0.387220594 | 2.831196352  | 0.172575864 | 0.275157626 | EIPR1-IT1  |
| ENSG00000228960 | 9.037812676 | 2.169915658 | 2.061145646  | 0.172683477 | 0.275312311 | OR2A9P     |
| ENSG00000148483 | 5.731573477 | 11.6274871  | -1.014068916 | 0.172754806 | 0.275409131 | TMEM236    |
| ENSG00000262966 | 2.709728314 | 0.387220594 | 2.811284738  | 0.172787523 | 0.275444388 | AC005695.1 |
| ENSG00000187790 | 118.5548478 | 157.3776013 | -0.410064108 | 0.172872112 | 0.275562326 | FANCM      |
| ENSG00000185390 | 3.361684828 | 0           | 4.082255806  | 0.172922754 | 0.275609231 | FGF7P2     |
| ENSG00000234965 | 3.361684828 | 0           | 4.082255806  | 0.172922754 | 0.275609231 | SHISA8     |

|                 |             |             |              |             |             |            |
|-----------------|-------------|-------------|--------------|-------------|-------------|------------|
| ENSG00000250280 | 1.188078446 | 5.04345273  | -2.07450682  | 0.173142156 | 0.275941993 | AC026124.1 |
| ENSG00000254718 | 12.77723172 | 6.103613158 | 1.064485906  | 0.173286967 | 0.276155842 | AL157756.1 |
| ENSG00000223476 | 2.71348926  | 0.356539013 | 2.812970257  | 0.173379647 | 0.276286593 | VN1R42P    |
| ENSG00000272420 | 9.944004385 | 3.180481283 | 1.639189689  | 0.173410618 | 0.276318998 | AL513477.2 |
| ENSG00000107281 | 874.2990651 | 1159.450819 | -0.407542006 | 0.173431256 | 0.276321403 | NPDC1      |
| ENSG00000231105 | 9.206372128 | 1.936102971 | 2.27847216   | 0.173433398 | 0.276321403 | AL031728.1 |
| ENSG00000119636 | 157.5308351 | 120.5156411 | 0.38814566   | 0.173509072 | 0.276425019 | BBOF1      |
| ENSG00000231028 | 16.86122028 | 8.142501754 | 1.045452295  | 0.173520867 | 0.276426859 | LINC00271  |
| ENSG00000109854 | 505.247389  | 647.6306526 | -0.358619923 | 0.173533571 | 0.276430148 | HTATIP2    |
| ENSG00000149090 | 1236.243616 | 2283.924092 | -0.88560668  | 0.173558535 | 0.276442929 | PAMR1      |
| ENSG00000224376 | 5.160206839 | 12.71704484 | -1.293805952 | 0.173562875 | 0.276442929 | AC017104.1 |
| ENSG00000279031 | 3.35040199  | 0           | 4.077644176  | 0.173613915 | 0.276490323 | AC004232.2 |
| ENSG00000287950 | 3.35040199  | 0           | 4.077644176  | 0.173613915 | 0.276490323 | AC009432.3 |
| novel.399       | 4.249000535 | 1.060160428 | 1.991077681  | 0.173696994 | 0.276605676 | -          |
| ENSG00000133131 | 490.3071927 | 595.0072361 | -0.27967661  | 0.173719683 | 0.276624852 | MORC4      |
| ENSG00000251548 | 0.89358395  | 3.923085015 | -2.125245144 | 0.173767317 | 0.276683745 | AC106760.2 |
| ENSG00000287005 | 2.726097019 | 6.950029995 | -1.343421497 | 0.174075106 | 0.277156841 | AC090018.2 |
| novel.1077      | 27.02038294 | 53.73953309 | -0.988430237 | 0.174158799 | 0.277273103 | -          |
| ENSG00000267317 | 108.8001455 | 72.90179808 | 0.579995931  | 0.174355321 | 0.27756897  | AC027307.2 |
| ENSG00000232727 | 13.64058555 | 23.23734525 | -0.770090481 | 0.174439608 | 0.277686138 | YWHAEP1    |
| ENSG00000237017 | 3.058414791 | 0.356539013 | 2.983109537  | 0.174451952 | 0.277688774 | AC245052.4 |
| ENSG00000078725 | 1.541779519 | 10.63125838 | -2.792759417 | 0.174481756 | 0.277719201 | BRINP1     |
| ENSG00000132300 | 1147.560128 | 1390.90313  | -0.277435665 | 0.174555701 | 0.277819876 | PTCD3      |
| novel.532       | 8.855463088 | 18.29321052 | -1.053673766 | 0.175000613 | 0.27851093  | -          |
| ENSG00000273112 | 3.532751578 | 0           | 4.156262698  | 0.175063445 | 0.278559735 | AL590385.2 |
| ENSG00000252271 | 3.532751578 | 0           | 4.156262698  | 0.175063445 | 0.278559735 | RNU6-1110P |
| ENSG00000258121 | 3.532751578 | 0           | 4.156262698  | 0.175063445 | 0.278559735 | AC089987.2 |
| ENSG00000205089 | 3.93054417  | 0.713078025 | 2.456910794  | 0.175110499 | 0.278617544 | CCNI2      |
| ENSG00000165355 | 258.90045   | 326.2205487 | -0.334222943 | 0.175126612 | 0.278626118 | FBXO33     |
| ENSG00000214435 | 3.617173671 | 0.693008929 | 2.356840116  | 0.175189154 | 0.278708555 | AS3MT      |
| ENSG00000259527 | 3.609580508 | 0.336469917 | 3.224491261  | 0.1752309   | 0.278747987 | LINC00052  |
| ENSG00000259209 | 8.726949475 | 3.159256312 | 1.455394888  | 0.175235398 | 0.278747987 | AC004943.1 |
| ENSG00000006625 | 403.3478491 | 529.1571109 | -0.392191277 | 0.175274548 | 0.278777153 | GGCT       |
| ENSG00000196199 | 1253.994714 | 1058.076132 | 0.24509743   | 0.175285172 | 0.278777153 | MPHOSPH8   |
| ENSG00000108384 | 220.8860998 | 309.5432815 | -0.487846419 | 0.175293487 | 0.278777153 | RAD51C     |
| ENSG00000214784 | 3.074783496 | 9.548460315 | -1.636513725 | 0.175296653 | 0.278777153 | AC010468.1 |
| ENSG00000261420 | 5.073277448 | 1.41669944  | 1.835048959  | 0.175313253 | 0.278786487 | AL022069.1 |
| ENSG00000254119 | 3.615920022 | 0.356539013 | 3.226834931  | 0.175340102 | 0.278803259 | AC025524.2 |
| ENSG00000265443 | 1.480065645 | 5.940620245 | -1.987090367 | 0.175345262 | 0.278803259 | AC127024.3 |
| ENSG00000257594 | 4.264115591 | 10.85317431 | -1.355749633 | 0.175440871 | 0.278938209 | GALNT4     |
| ENSG00000282951 | 8.115323534 | 2.91483114  | 1.487283728  | 0.175511607 | 0.279033598 | AC008537.4 |
| ENSG00000272831 | 2.728604316 | 0.336469917 | 2.819809328  | 0.175556055 | 0.279060694 | AC027644.3 |
| ENSG00000272788 | 0           | 3.078979928 | -4.20753104  | 0.175560873 | 0.279060694 | AP000864.1 |
| ENSG00000254131 | 0           | 3.078979928 | -4.20753104  | 0.175560873 | 0.279060694 | AC093367.1 |
| ENSG00000286223 | 19.52177121 | 8.620482824 | 1.19342457   | 0.1756207   | 0.279138713 | AC064836.4 |
| ENSG00000130734 | 190.8426618 | 242.184001  | -0.3429691   | 0.175728873 | 0.279286016 | ATG4D      |
| ENSG00000272870 | 102.9467539 | 58.97666031 | 0.806645937  | 0.175742763 | 0.279286016 | AC097534.2 |
| ENSG00000132475 | 11743.11155 | 9458.137007 | 0.312177829  | 0.175745625 | 0.279286016 | H3F3B      |
| novel.857       | 67.65204714 | 30.8592876  | 1.131172157  | 0.175799281 | 0.279354197 | -          |
| ENSG00000231851 | 13.29064543 | 5.574624622 | 1.268297153  | 0.175823365 | 0.27937538  | AC104655.1 |
| ENSG00000137094 | 656.3945828 | 1133.497096 | -0.787920633 | 0.175927334 | 0.279519431 | DNAJB5     |

|                 |             |             |              |             |             |            |
|-----------------|-------------|-------------|--------------|-------------|-------------|------------|
| ENSG00000166261 | 300.4685516 | 224.3574356 | 0.42157065   | 0.17593554  | 0.279519431 | ZNF202     |
| ENSG00000135823 | 912.4948402 | 768.8416828 | 0.247258118  | 0.176028604 | 0.279650186 | STX6       |
| ENSG00000153391 | 123.299711  | 179.367533  | -0.541981214 | 0.176146918 | 0.279809876 | INO80C     |
| ENSG00000286952 | 6.908297814 | 1.813376645 | 1.935430029  | 0.176157886 | 0.279809876 | AC093928.1 |
| ENSG00000228335 | 7.404089172 | 1.702418679 | 2.09910505   | 0.176170581 | 0.279809876 | AC073063.1 |
| ENSG00000260903 | 3.940644631 | 0.774441189 | 2.401813147  | 0.176172201 | 0.279809876 | XKR7       |
| ENSG00000152558 | 3419.930835 | 4193.750108 | -0.294242752 | 0.17625815  | 0.279929274 | TMEM123    |
| ENSG00000236423 | 4.499403511 | 10.24146924 | -1.176236568 | 0.176293847 | 0.279968854 | LINC01134  |
| ENSG00000224945 | 102.0274559 | 186.6054059 | -0.869729483 | 0.176317206 | 0.279988835 | AL353150.1 |
| ENSG00000128294 | 403.1976508 | 626.5883098 | -0.635890369 | 0.176360189 | 0.280030391 | TPST2      |
| ENSG00000237803 | 0.894837599 | 5.206317249 | -2.528291731 | 0.176364932 | 0.280030391 | LINC00211  |
| ENSG00000242175 | 3.594465451 | 0.356539013 | 3.218911431  | 0.176462842 | 0.28016873  | RN7SL127P  |
| ENSG00000230295 | 12.66884776 | 5.677410247 | 1.153733928  | 0.176475687 | 0.280172002 | GTF2IP23   |
| ENSG00000273805 | 3.342808826 | 0.693008929 | 2.238758178  | 0.176523127 | 0.280230195 | AC083805.3 |
| ENSG00000249222 | 0           | 2.913675265 | -4.122806145 | 0.176554317 | 0.280246629 | ATP5MGL    |
| ENSG00000259318 | 18.92490432 | 5.083590922 | 1.899592567  | 0.176555053 | 0.280246629 | AL356801.1 |
| ENSG00000287319 | 2.139615324 | 0           | 3.429591747  | 0.176623392 | 1           | AC079822.1 |
| ENSG00000249167 | 2.139615324 | 0           | 3.429591747  | 0.176623392 | 1           | SEMA6A-AS2 |
| ENSG00000146521 | 2.139615324 | 0           | 3.429591747  | 0.176623392 | 1           | LINC01558  |
| ENSG00000272395 | 2.139615324 | 0           | 3.429591747  | 0.176623392 | 1           | IFNL4      |
| ENSG00000233936 | 2.139615324 | 0           | 3.429591747  | 0.176623392 | 1           | AL390778.2 |
| ENSG00000156860 | 1619.917474 | 2029.306694 | -0.324894435 | 0.176640948 | 0.280365843 | FBRS       |
| ENSG00000213965 | 179.0187901 | 239.2287405 | -0.419521349 | 0.176766765 | 0.280548401 | NUDT19     |
| ENSG00000099246 | 1213.005957 | 1471.050194 | -0.278377237 | 0.176802453 | 0.280587902 | RAB18      |
| ENSG00000178057 | 1680.471807 | 1372.186102 | 0.292384673  | 0.17681846  | 0.280596164 | NDUFAF3    |
| ENSG00000086589 | 855.2608064 | 714.0478158 | 0.260195054  | 0.176838305 | 0.280610517 | RBM22      |
| ENSG00000039139 | 27.92811303 | 47.49556465 | -0.762874654 | 0.176873694 | 0.280649532 | DNAH5      |
| ENSG00000250687 | 9.616772479 | 3.362259022 | 1.535030108  | 0.176985224 | 0.280802163 | AC146944.2 |
| ENSG00000115539 | 332.9429083 | 438.2203848 | -0.396976967 | 0.176991503 | 0.280802163 | PDCL3      |
| novel.375       | 50.08486364 | 28.60896717 | 0.808269804  | 0.177077062 | 0.280912819 | -          |
| ENSG00000188312 | 64.66634398 | 93.00290984 | -0.526525043 | 0.177082874 | 0.280912819 | CENPP      |
| ENSG00000072736 | 183.7236071 | 254.9542364 | -0.473616359 | 0.177094297 | 0.280913787 | NFATC3     |
| ENSG00000108947 | 48.86128324 | 110.2865354 | -1.174494053 | 0.177116838 | 0.280932391 | EFNB3      |
| ENSG00000186300 | 166.5873815 | 119.5001952 | 0.481472844  | 0.177154691 | 0.280962207 | ZNF555     |
| ENSG00000276462 | 2.695866906 | 0.356539013 | 2.804947037  | 0.177161494 | 0.280962207 | BX255923.2 |
| ENSG00000278905 | 10.94944851 | 2.139234076 | 2.354285808  | 0.177168078 | 0.280962207 | AC106818.1 |
| ENSG00000213676 | 6.67809576  | 18.28730275 | -1.454228647 | 0.177224752 | 0.28102286  | ATF6B      |
| ENSG00000225855 | 114.4402022 | 79.32656396 | 0.530104528  | 0.177227957 | 0.28102286  | RUSC1-AS1  |
| ENSG00000119048 | 1188.928482 | 991.9546588 | 0.261298386  | 0.177245679 | 0.281033809 | UBE2B      |
| ENSG00000198658 | 30.20125656 | 17.50918433 | 0.783648228  | 0.17727556  | 0.281064034 | ABHD17AP1  |
| ENSG00000214940 | 4.179693498 | 0.672939833 | 2.59320067   | 0.177390233 | 0.281228682 | NPIPA8     |
| ENSG00000121680 | 374.3226758 | 463.1562831 | -0.306773881 | 0.177403589 | 0.281232696 | PEX16      |
| ENSG00000162302 | 1484.690962 | 1167.199503 | 0.346825258  | 0.177578839 | 0.281493338 | RPS6KA4    |
| ENSG00000278845 | 4.561117385 | 10.53908524 | -1.216096575 | 0.177643582 | 0.281578292 | MRPL45     |
| novel.1101      | 7.827097281 | 3.260757667 | 1.270931521  | 0.177654107 | 0.281578292 | -          |
| ENSG00000068697 | 4644.449074 | 6140.508108 | -0.402859551 | 0.177699169 | 0.281619451 | LAPTM4A    |
| ENSG00000144840 | 355.2918517 | 439.4583758 | -0.307289361 | 0.177701754 | 0.281619451 | RABL3      |
| ENSG00000280300 | 11.40394038 | 5.370466037 | 1.087434847  | 0.177799875 | 0.281757765 | AC117503.4 |
| ENSG00000104901 | 10.71695262 | 3.392940604 | 1.676259173  | 0.177868376 | 0.281849127 | DKKL1      |
| ENSG00000160584 | 882.8712775 | 653.3854411 | 0.434694544  | 0.177908164 | 0.281894981 | SIK3       |
| ENSG00000254577 | 7.814489523 | 2.893606169 | 1.438989512  | 0.177969254 | 0.281974582 | AC087276.1 |

|                 |             |             |              |             |             |            |
|-----------------|-------------|-------------|--------------|-------------|-------------|------------|
| ENSG00000159915 | 14.82608543 | 7.234593359 | 1.03865167   | 0.178063738 | 0.282092111 | ZNF233     |
| ENSG00000275106 | 5.174068246 | 1.161661783 | 2.199448083  | 0.178085092 | 0.282092111 | AC025594.2 |
| ENSG00000239828 | 5.174068246 | 1.161661783 | 2.199448083  | 0.178085092 | 0.282092111 | AC063944.1 |
| ENSG00000099960 | 3.945659226 | 0.713078025 | 2.461796205  | 0.178086863 | 0.282092111 | SLC7A4     |
| ENSG00000081154 | 2913.488403 | 2454.843378 | 0.247152857  | 0.17813802  | 0.282155941 | PCNP       |
| ENSG00000175691 | 84.40180599 | 58.60968439 | 0.52820071   | 0.178200494 | 0.282213204 | ZNF77      |
| ENSG00000173376 | 28.29574643 | 74.25084141 | -1.391958581 | 0.178206263 | 0.282213204 | NDNF       |
| ENSG00000147586 | 160.3336901 | 206.0162997 | -0.362572038 | 0.178206759 | 0.282213204 | MRPS28     |
| ENSG00000228057 | 1.832513069 | 5.677410247 | -1.639706136 | 0.178309628 | 0.282358899 | SEC63P1    |
| ENSG00000235688 | 14.71311415 | 33.69512663 | -1.199146556 | 0.178412791 | 0.282505042 | SNTG2-AS1  |
| ENSG00000160075 | 2029.469549 | 2431.431953 | -0.260783471 | 0.178426614 | 0.282509711 | SSU72      |
| ENSG00000144468 | 447.6499528 | 537.9235397 | -0.265436148 | 0.178520009 | 0.282640363 | RHBDD1     |
| ENSG00000223343 | 6.056298086 | 1.702418679 | 1.799466993  | 0.178549058 | 0.282649407 | AC137630.1 |
| ENSG00000102057 | 99.28236814 | 145.5434686 | -0.550670039 | 0.178554864 | 0.282649407 | KCND1      |
| ENSG00000200737 | 0.308355904 | 3.148643826 | -3.278030901 | 0.178558359 | 0.282649407 | RF00019    |
| ENSG00000226564 | 13.66705472 | 27.48243489 | -1.003503995 | 0.178781586 | 0.282985524 | FTH1P20    |
| ENSG00000251322 | 5.839886168 | 19.35054562 | -1.727132169 | 0.17879546  | 0.282990243 | SHANK3     |
| ENSG00000139220 | 12.3214862  | 33.14550824 | -1.423844042 | 0.178811336 | 0.282998132 | PPFIA2     |
| ENSG00000197768 | 6.933513331 | 2.42610919  | 1.494922239  | 0.178983892 | 0.283253974 | STPG3      |
| ENSG00000275468 | 0.293240848 | 3.148643826 | -3.27802118  | 0.178996218 | 0.283256228 | AC004678.1 |
| ENSG00000259028 | 2.111892509 | 0           | 3.412816963  | 0.179309872 | 1           | AL135746.1 |
| ENSG00000280222 | 2.111892509 | 0           | 3.412816963  | 0.179309872 | 1           | AL365209.1 |
| ENSG00000237614 | 2.111892509 | 0           | 3.412816963  | 0.179309872 | 1           | AC073257.2 |
| ENSG00000285165 | 2.111892509 | 0           | 3.412816963  | 0.179309872 | 1           | AC124014.1 |
| ENSG00000236542 | 2.111892509 | 0           | 3.412816963  | 0.179309872 | 1           | MED28P7    |
| ENSG00000270554 | 2.111892509 | 0           | 3.412816963  | 0.179309872 | 1           | AC069431.2 |
| ENSG00000183128 | 2.111892509 | 0           | 3.412816963  | 0.179309872 | 1           | CALHM3     |
| ENSG00000231102 | 2.111892509 | 0           | 3.412816963  | 0.179309872 | 1           | AL035588.1 |
| ENSG00000236905 | 2.109385211 | 0           | 3.411300221  | 0.179555314 | 1           | AC104333.3 |
| ENSG00000288061 | 2.109385211 | 0           | 3.411300221  | 0.179555314 | 1           | AP000926.2 |
| novel.582       | 2.109385211 | 0           | 3.411300221  | 0.179555314 | 1           | -          |
| ENSG00000234210 | 2.109385211 | 0           | 3.411300221  | 0.179555314 | 1           | AC006372.3 |
| ENSG00000186150 | 2.109385211 | 0           | 3.411300221  | 0.179555314 | 1           | UBL4B      |
| ENSG00000253838 | 2.109385211 | 0           | 3.411300221  | 0.179555314 | 1           | AC007991.2 |
| ENSG00000237062 | 2.109385211 | 0           | 3.411300221  | 0.179555314 | 1           | AL512649.2 |
| ENSG00000175820 | 3.255879435 | 0           | 4.038359851  | 0.179580919 | 0.284155721 | CCDC168    |
| ENSG00000119403 | 826.3005116 | 1183.793261 | -0.518853325 | 0.179586503 | 0.284155721 | PHF19      |
| ENSG00000089723 | 0.922560414 | 4.534533291 | -2.295817818 | 0.17972673  | 0.284360281 | OTUB2      |
| ENSG00000223963 | 3.253372138 | 0           | 4.0373067    | 0.179743274 | 0.284369138 | THAP12P8   |
| ENSG00000226781 | 13.56117806 | 25.37516667 | -0.897691213 | 0.179769714 | 0.284393652 | TBCAP1     |
| ENSG00000163737 | 8.180798353 | 28.46416396 | -1.801464807 | 0.179787287 | 0.284404134 | PF4        |
| ENSG00000117153 | 651.789457  | 779.6404761 | -0.258665536 | 0.179811289 | 0.284424785 | KLHL12     |
| ENSG00000179008 | 15.34995561 | 36.42774767 | -1.246898757 | 0.179930976 | 0.284596778 | C14orf39   |
| ENSG00000236264 | 15.11932628 | 27.4518817  | -0.856254542 | 0.180115258 | 0.284870915 | RPL26P30   |
| ENSG00000246662 | 8.557207645 | 3.200550379 | 1.412211676  | 0.180135984 | 0.284886352 | LINC00535  |
| ENSG00000142871 | 10616.57228 | 18670.84133 | -0.814469077 | 0.180170938 | 0.284924288 | CCN1       |
| ENSG00000277368 | 3.579350395 | 0.356539013 | 3.213286452  | 0.180189057 | 0.284935599 | AL138966.2 |
| ENSG00000254363 | 30.31749059 | 14.07250951 | 1.110022315  | 0.180233713 | 0.284988869 | AC011379.2 |
| ENSG00000224975 | 27.59049593 | 47.43561415 | -0.778805032 | 0.18031145  | 0.285094437 | INE1       |
| ENSG00000137154 | 16286.53526 | 20440.21107 | -0.327737842 | 0.180361188 | 0.285155725 | RPS6       |
| ENSG00000257763 | 2.961384939 | 0.356539013 | 2.94190911   | 0.180395616 | 0.285192802 | OR5BK1P    |

|                 |             |             |              |             |             |             |
|-----------------|-------------|-------------|--------------|-------------|-------------|-------------|
| ENSG00000236810 | 19.04109491 | 30.82745015 | -0.698072118 | 0.180446154 | 0.285255341 | ELOA-AS1    |
| ENSG00000285996 | 10.31665273 | 4.381125383 | 1.243447682  | 0.180458786 | 0.285257953 | AC006116.11 |
| ENSG00000272087 | 13.91996499 | 7.042203135 | 0.973088506  | 0.180531047 | 0.285354817 | AC080013.4  |
| ENSG00000128534 | 853.1089545 | 700.5225658 | 0.284102486  | 0.180572454 | 0.285402904 | LSM8        |
| ENSG00000232573 | 1402.177058 | 1736.816548 | -0.308740983 | 0.180594039 | 0.285404453 | RPL3P4      |
| ENSG00000237424 | 134.5707201 | 67.46004555 | 0.994398508  | 0.180595404 | 0.285404453 | FOXD2-AS1   |
| ENSG00000184182 | 212.4787894 | 161.810248  | 0.392409071  | 0.180679834 | 0.285520514 | UBE2F       |
| ENSG00000254349 | 2.140868972 | 0           | 3.430378531  | 0.180697065 | 1           | MIR2052HG   |
| novel.27        | 2.140868972 | 0           | 3.430378531  | 0.180697065 | 1           | -           |
| ENSG00000233008 | 2.140868972 | 0           | 3.430378531  | 0.180697065 | 1           | LINC01725   |
| ENSG00000274508 | 2.140868972 | 0           | 3.430378531  | 0.180697065 | 1           | AC007336.2  |
| ENSG00000279275 | 2.140868972 | 0           | 3.430378531  | 0.180697065 | 1           | AP002505.2  |
| ENSG00000250988 | 20.27326487 | 31.25712068 | -0.627788123 | 0.180716254 | 0.285547463 | SNHG21      |
| ENSG00000228653 | 9.937736141 | 4.330374705 | 1.202413946  | 0.18072816  | 0.285547463 | HNRNPCP7    |
| ENSG00000172725 | 2023.716507 | 2481.261231 | -0.294061049 | 0.180729859 | 0.285547463 | CORO1B      |
| ENSG00000171566 | 991.0349498 | 1205.247197 | -0.282490252 | 0.18076174  | 0.285580466 | PLRG1       |
| ENSG00000250959 | 61.67659548 | 40.9095225  | 0.591000733  | 0.180801145 | 0.285581557 | GLUD1P3     |
| ENSG00000204022 | 3.885199001 | 0.672939833 | 2.485475027  | 0.180801651 | 0.285581557 | LIPJ        |
| ENSG00000181007 | 158.0022655 | 117.9517452 | 0.421144622  | 0.180806197 | 0.285581557 | ZFP82       |
| ENSG00000262519 | 3.01557692  | 9.153067379 | -1.603722538 | 0.18081723  | 0.285581557 | TXNP4       |
| ENSG00000267080 | 101.2998806 | 140.2038594 | -0.470882725 | 0.1808177   | 0.285581557 | ASB16-AS1   |
| ENSG00000125266 | 656.6069446 | 368.3857636 | 0.833258408  | 0.180828382 | 0.285581557 | EFNB2       |
| ENSG00000259169 | 2.961384939 | 0.336469917 | 2.941898634  | 0.180865454 | 0.285622742 | GNRHR2P1    |
| ENSG00000226855 | 2.75758078  | 0.387220594 | 2.833006979  | 0.180889326 | 0.285625718 | RPSAP17     |
| ENSG00000235917 | 2.75758078  | 0.387220594 | 2.833006979  | 0.180889326 | 0.285625718 | MTCO2P11    |
| ENSG00000287259 | 2.138361675 | 0           | 3.428872685  | 0.180940158 | 1           | AL359732.1  |
| novel.80        | 2.138361675 | 0           | 3.428872685  | 0.180940158 | 1           | -           |
| ENSG00000238755 | 2.138361675 | 0           | 3.428872685  | 0.180940158 | 1           | LINC02006   |
| ENSG00000252172 | 2.138361675 | 0           | 3.428872685  | 0.180940158 | 1           | RNU6-720P   |
| ENSG00000204283 | 2.138361675 | 0           | 3.428872685  | 0.180940158 | 1           | LINC01973   |
| ENSG00000235538 | 2.138361675 | 0           | 3.428872685  | 0.180940158 | 1           | AL078602.1  |
| ENSG00000207325 | 2.138361675 | 0           | 3.428872685  | 0.180940158 | 1           | RNY1P4      |
| ENSG00000130702 | 1932.558397 | 1194.874575 | 0.693458111  | 0.18104397  | 0.28585253  | LAMA5       |
| ENSG00000255100 | 1.84261353  | 8.205020793 | -2.160163884 | 0.181068161 | 0.285873352 | AP003119.2  |
| ENSG00000272078 | 8.290435964 | 2.171071533 | 1.935329862  | 0.181145943 | 0.285978777 | AL139423.1  |
| ENSG00000251188 | 15.38491558 | 8.15311424  | 0.910690905  | 0.18117065  | 0.286000404 | AC079140.3  |
| ENSG00000186891 | 9.239394272 | 1.844058227 | 2.332835859  | 0.181207119 | 0.286040596 | TNFRSF18    |
| ENSG00000008405 | 341.4775068 | 239.7388158 | 0.509338585  | 0.181366174 | 0.286263772 | CRY1        |
| ENSG00000160838 | 6.318055173 | 14.58502497 | -1.211341857 | 0.181370538 | 0.286263772 | LRRRC71     |
| ENSG00000124134 | 20.81099646 | 9.091704216 | 1.186076774  | 0.181390749 | 0.286278281 | KCNS1       |
| ENSG00000049656 | 479.60477   | 644.2483717 | -0.426219573 | 0.181410818 | 0.286283718 | CLPTM1L     |
| ENSG00000142396 | 109.4850528 | 71.05945649 | 0.621154173  | 0.181416233 | 0.286283718 | ERVK3-1     |
| ENSG00000160951 | 3.914175465 | 10.03029419 | -1.363721192 | 0.181484035 | 0.286358233 | PTGER1      |
| ENSG00000140740 | 106.7738571 | 172.0135869 | -0.6873899   | 0.181485496 | 0.286358233 | UQCRC2      |
| ENSG00000161618 | 477.045451  | 687.2209146 | -0.526844644 | 0.181685567 | 0.286656507 | ALDH16A1    |
| ENSG00000277400 | 15.49942525 | 4.096562019 | 1.928383196  | 0.18178257  | 0.28679214  | AC145212.1  |
| ENSG00000239884 | 8.452655901 | 3.546476906 | 1.246527479  | 0.181838371 | 0.286862755 | RN7SL608P   |
| ENSG00000234009 | 87.45262762 | 117.2492797 | -0.423065169 | 0.181905984 | 0.286951996 | RPL5P34     |
| ENSG00000169758 | 20.94388393 | 10.53780097 | 0.997349338  | 0.181951463 | 0.287006311 | TMEM266     |
| ENSG00000163497 | 5.550406267 | 0           | 4.805774196  | 0.181980719 | 0.287035032 | FEV         |
| ENSG00000271761 | 2.127007565 | 0           | 3.421991857  | 0.182050784 | 1           | AL021368.1  |

|                 |             |             |              |             |             |            |
|-----------------|-------------|-------------|--------------|-------------|-------------|------------|
| ENSG00000233760 | 2.127007565 | 0           | 3.421991857  | 0.182050784 | 1           | AC004947.1 |
| ENSG00000132704 | 2.127007565 | 0           | 3.421991857  | 0.182050784 | 1           | FCRL2      |
| ENSG00000249026 | 2.127007565 | 0           | 3.421991857  | 0.182050784 | 1           | CTNNA1P1   |
| ENSG00000179873 | 2.127007565 | 0           | 3.421991857  | 0.182050784 | 1           | NLRP11     |
| ENSG00000147459 | 1458.373502 | 925.3109517 | 0.656530345  | 0.182151077 | 0.287286295 | DOCK5      |
| ENSG00000255201 | 3.675126598 | 14.3462036  | -1.963562566 | 0.182240592 | 0.287406475 | AC087623.1 |
| ENSG00000228434 | 2.666890443 | 8.640680314 | -1.687290476 | 0.182249401 | 0.287406475 | AC004951.1 |
| ENSG00000278311 | 32.93716931 | 52.59272178 | -0.676482011 | 0.182371725 | 0.287581925 | GGNBP2     |
| ENSG00000241889 | 2.449224876 | 6.716345703 | -1.466055247 | 0.182403158 | 0.287614035 | AC079944.2 |
| ENSG00000248514 | 2.123246619 | 0           | 3.419721584  | 0.182419826 | 1           | AC008443.4 |
| ENSG00000256039 | 2.123246619 | 0           | 3.419721584  | 0.182419826 | 1           | LINC02446  |
| ENSG00000231665 | 3.649911081 | 0.672939833 | 2.389294017  | 0.182443193 | 0.287648142 | OGFOD1P1   |
| ENSG00000164796 | 3.082305388 | 10.3029608  | -1.748031518 | 0.182446931 | 0.287648142 | CSMD3      |
| ENSG00000227733 | 5.951746342 | 1.753169357 | 1.75321503   | 0.182491337 | 0.287700693 | AC239809.3 |
| ENSG00000188868 | 39.27814616 | 24.246755   | 0.693007233  | 0.182553314 | 0.287764285 | ZNF563     |
| ENSG00000230069 | 2.752566185 | 0.336469917 | 2.830762385  | 0.182553826 | 0.287764285 | LRRC37A15P |
| ENSG00000269373 | 2.743719372 | 0.356539013 | 2.826715147  | 0.182623983 | 0.287839948 | AC008739.2 |
| ENSG00000215910 | 2.743719372 | 0.356539013 | 2.826715147  | 0.182623983 | 0.287839948 | C1orf167   |
| ENSG00000129460 | 524.6185947 | 413.0862572 | 0.344721506  | 0.182684172 | 0.287907977 | NGDN       |
| ENSG00000284471 | 5.921516229 | 1.00940975  | 2.522266864  | 0.182689308 | 0.287907977 | CR769775.2 |
| ENSG00000256393 | 31.21923717 | 47.54417915 | -0.606219157 | 0.182871919 | 0.288178282 | RPL41P5    |
| ENSG00000234264 | 0           | 2.751966622 | -4.045835036 | 0.182895461 | 0.288197899 | DEPDC1-AS1 |
| ENSG00000104432 | 28.2148009  | 14.53299003 | 0.954813389  | 0.182921315 | 0.288221158 | IL7        |
| ENSG00000232134 | 2.737451129 | 0.356539013 | 2.823878069  | 0.183047882 | 0.288384224 | RPS15AP12  |
| ENSG00000249937 | 2.737451129 | 0.356539013 | 2.823878069  | 0.183047882 | 0.288384224 | LINC02223  |
| novel.1         | 1.846374476 | 9.078523192 | -2.298080932 | 0.183058105 | 0.288384224 | -          |
| ENSG00000223431 | 5.640883141 | 0.713078025 | 2.980902794  | 0.18311615  | 0.288432807 | MTND6P21   |
| ENSG00000204514 | 181.9185321 | 229.922732  | -0.338383536 | 0.18311672  | 0.288432807 | ZNF814     |
| ENSG00000235363 | 13.41163715 | 25.74373083 | -0.943085147 | 0.183126191 | 0.288432807 | SNRPGP10   |
| ENSG00000178537 | 285.593601  | 227.5288454 | 0.326773079  | 0.183133351 | 0.288432807 | SLC25A20   |
| ENSG00000274987 | 8.719427583 | 3.352802412 | 1.399933023  | 0.183262589 | 0.28861886  | AC092794.1 |
| ENSG00000275074 | 142.7026693 | 204.1414787 | -0.517597497 | 0.183284371 | 0.288621341 | NUDT18     |
| ENSG00000175175 | 8.523145316 | 3.169868797 | 1.416001576  | 0.183286382 | 0.288621341 | PPM1E      |
| ENSG00000279622 | 3.077290793 | 0           | 3.954147645  | 0.183360483 | 0.288685535 | AC025280.2 |
| novel.453       | 3.077290793 | 0           | 3.954147645  | 0.183360483 | 0.288685535 | -          |
| ENSG00000226965 | 3.077290793 | 0           | 3.954147645  | 0.183360483 | 0.288685535 | AC073114.1 |
| ENSG00000103274 | 220.5270997 | 171.6646251 | 0.36074194   | 0.183384933 | 0.288706535 | NUBP1      |
| ENSG00000276997 | 2.387511003 | 7.733927794 | -1.684585793 | 0.183426698 | 0.288754789 | AL513314.2 |
| ENSG00000263887 | 3.313832363 | 0.693008929 | 2.229155612  | 0.183471866 | 0.288804277 | AC053481.2 |
| ENSG00000112419 | 611.5205772 | 1188.911163 | -0.959326829 | 0.183480581 | 0.288804277 | PHACTR2    |
| ENSG00000146373 | 458.7961539 | 593.4085018 | -0.371539528 | 0.183491482 | 0.288804277 | RNF217     |
| ENSG00000101574 | 192.7275003 | 241.0908944 | -0.323201003 | 0.183560818 | 0.288895906 | METTL4     |
| ENSG00000278834 | 16.00538834 | 8.205020793 | 0.96211638   | 0.183627151 | 0.288982798 | AC073508.3 |
| ENSG00000164932 | 641.5076719 | 1321.205924 | -1.0423915   | 0.183661057 | 0.289018651 | CTHRC1     |
| ENSG00000263072 | 174.2012584 | 229.2294191 | -0.395059566 | 0.183683263 | 0.289036088 | ZNF213-AS1 |
| ENSG00000167306 | 17.48316015 | 7.561606666 | 1.208525191  | 0.183729649 | 0.28909157  | MYO5B      |
| ENSG00000154548 | 18.8385444  | 9.87675789  | 0.923756932  | 0.183755523 | 0.289114774 | SRSF12     |
| ENSG00000205531 | 321.75498   | 427.6227493 | -0.410290861 | 0.183789383 | 0.289150537 | NAP1L4     |
| ENSG00000233232 | 3.619680969 | 0.672939833 | 2.378983753  | 0.183871462 | 0.289262152 | NPIP7      |
| ENSG00000267044 | 0.586481695 | 3.515795324 | -2.566986096 | 0.183917891 | 0.289317675 | AC005757.1 |
| novel.1109      | 33.37493647 | 17.48654669 | 0.941854652  | 0.183938995 | 0.289333355 | -          |

|                  |             |             |              |             |             |            |
|------------------|-------------|-------------|--------------|-------------|-------------|------------|
| ENSG00000256238  | 3.352909287 | 8.315978758 | -1.311558307 | 0.183950834 | 0.28933446  | SUPT16HP1  |
| ENSG00000146066  | 514.9320716 | 661.1078364 | -0.360353369 | 0.184001683 | 0.289396921 | HIGD2A     |
| ENSG00000000460  | 138.7158965 | 182.2853994 | -0.394883169 | 0.184150485 | 0.289613424 | C1orf112   |
| ENSG00000145246  | 424.2078366 | 604.0005679 | -0.51028885  | 0.184211397 | 0.289691683 | ATP10D     |
| ENSG00000133083  | 201.2908608 | 83.23425023 | 1.272697013  | 0.184319121 | 0.289791301 | DCLK1      |
| ENSG00000169696  | 559.4836535 | 668.117945  | -0.255825873 | 0.184327076 | 0.289791301 | ASPSCR1    |
| ENSG00000272817  | 3.078544442 | 0           | 3.95471052   | 0.184341666 | 0.289791301 | AL359198.1 |
| ENSG00000211787  | 3.078544442 | 0           | 3.95471052   | 0.184341666 | 0.289791301 | TRAV8-3    |
| ENSG00000167910  | 3.078544442 | 0           | 3.95471052   | 0.184341666 | 0.289791301 | CYP7A1     |
| ENSG00000143355  | 3.078544442 | 0           | 3.95471052   | 0.184341666 | 0.289791301 | LHX9       |
| ENSG00000214753  | 1623.392101 | 1344.863085 | 0.271676465  | 0.184358437 | 0.289800131 | HNRNPUL2   |
| ENSG00000260920  | 34.18946892 | 48.86408195 | -0.512411711 | 0.184411516 | 0.28986603  | AL031985.3 |
| ENSG00000117620  | 488.5213222 | 367.6999683 | 0.409298696  | 0.184438364 | 0.289890692 | SLC35A3    |
| ENSG00000261762  | 1.233423615 | 5.909938664 | -2.264471521 | 0.184474918 | 0.289921239 | AC027228.2 |
| ENSG00000138376  | 178.4167386 | 266.0393443 | -0.576098428 | 0.184480117 | 0.289921239 | BARD1      |
| ENSG00000183036  | 3.076037145 | 0           | 3.953598079  | 0.184519068 | 0.289947375 | PCP4       |
| ENSG00000233942  | 3.076037145 | 0           | 3.953598079  | 0.184519068 | 0.289947375 | AC004012.1 |
| ENSG00000267650  | 4.134348329 | 0.723690511 | 2.524234058  | 0.184634811 | 0.290097548 | AC008742.1 |
| ENSG00000143575  | 1054.853766 | 1340.753462 | -0.346258997 | 0.184636967 | 0.290097548 | HAX1       |
| ENSG000000006025 | 357.0202559 | 278.4087931 | 0.359328753  | 0.18474335  | 0.290247142 | AC003665.1 |
| ENSG00000166887  | 1697.730935 | 2074.383611 | -0.288903096 | 0.184847236 | 0.290392795 | VPS39      |
| ENSG00000234998  | 0.921306765 | 4.555886656 | -2.318252412 | 0.184869002 | 0.290409428 | AC244453.3 |
| ENSG00000167565  | 647.0792684 | 506.2572974 | 0.353996629  | 0.185027581 | 0.290640967 | SERTAD3    |
| ENSG00000230162  | 2.096777453 | 0           | 3.403566739  | 0.185057124 | 1           | CT45A11P   |
| ENSG00000279135  | 2.096777453 | 0           | 3.403566739  | 0.185057124 | 1           | AL512652.2 |
| ENSG00000236894  | 2.096777453 | 0           | 3.403566739  | 0.185057124 | 1           | AL160287.1 |
| ENSG00000229356  | 2.096777453 | 0           | 3.403566739  | 0.185057124 | 1           | LRRC3-DT   |
| ENSG00000204389  | 2.096777453 | 0           | 3.403566739  | 0.185057124 | 1           | HSPA1A     |
| ENSG00000275846  | 2.096777453 | 0           | 3.403566739  | 0.185057124 | 1           | AL513548.3 |
| ENSG00000100721  | 2.096777453 | 0           | 3.403566739  | 0.185057124 | 1           | TCL1A      |
| ENSG00000166349  | 10.02466553 | 21.24548292 | -1.078417472 | 0.185071573 | 0.290692493 | RAG1       |
| novel.862        | 8.795002863 | 3.944309986 | 1.156068325  | 0.185095489 | 0.290712483 | -          |
| ENSG00000104361  | 488.2982534 | 311.730779  | 0.64699911   | 0.185153632 | 0.290786224 | NIPAL2     |
| ENSG00000224666  | 2.095523804 | 0           | 3.402802199  | 0.185183147 | 1           | Z84484.1   |
| ENSG00000284987  | 2.095523804 | 0           | 3.402802199  | 0.185183147 | 1           | U52112.2   |
| ENSG00000287449  | 2.095523804 | 0           | 3.402802199  | 0.185183147 | 1           | AC108019.2 |
| ENSG00000136213  | 500.0250682 | 648.949387  | -0.376065468 | 0.18519229  | 0.290820754 | CHST12     |
| ENSG00000285518  | 5.69632877  | 0.774441189 | 2.917354874  | 0.185198011 | 0.290820754 | AC004900.1 |
| ENSG00000243926  | 19.68176858 | 9.711324833 | 1.032893658  | 0.185210478 | 0.290820754 | TIPARP-AS1 |
| novel.460        | 29.55152261 | 47.75419833 | -0.688782604 | 0.185226333 | 0.290820754 | -          |
| ENSG00000250271  | 0.308355904 | 3.384768263 | -3.385488754 | 0.185231586 | 0.290820754 | AC068647.2 |
| ENSG00000160161  | 15.2428253  | 29.68418801 | -0.958247974 | 0.185265173 | 0.29085591  | CILP2      |
| ENSG00000236723  | 6.65538754  | 2.537067156 | 1.39760139   | 0.185437211 | 0.291107909 | AL606760.2 |
| ENSG00000212978  | 194.9210225 | 245.2549842 | -0.332107371 | 0.185448097 | 0.291107909 | AC016747.1 |
| ENSG00000204540  | 5.969368695 | 1.487519214 | 2.025584358  | 0.185554324 | 0.291257063 | PSORS1C1   |
| ENSG00000263624  | 1.788421549 | 5.817893919 | -1.690115167 | 0.185597117 | 0.291306634 | AC055811.1 |
| ENSG00000251692  | 0           | 2.793260689 | -4.065558726 | 0.185646975 | 0.291367286 | PTX4       |
| ENSG00000136111  | 631.1095642 | 973.7165088 | -0.625910531 | 0.185802153 | 0.291552087 | TBC1D4     |
| ENSG00000261033  | 3.390661292 | 0           | 4.094151094  | 0.185809609 | 0.291552087 | AC005730.2 |
| ENSG00000278196  | 3.390661292 | 0           | 4.094151094  | 0.185809609 | 0.291552087 | IGLV2-8    |
| ENSG00000239389  | 3.390661292 | 0           | 4.094151094  | 0.185809609 | 0.291552087 | PCDHA13    |



|                 |             |             |              |             |             |             |
|-----------------|-------------|-------------|--------------|-------------|-------------|-------------|
| ENSG00000180525 | 4.206162664 | 9.945137519 | -1.230893293 | 0.185934338 | 0.291725081 | PRR26       |
| novel.188       | 10.6703538  | 4.717595299 | 1.181185424  | 0.185942317 | 0.291725081 | -           |
| ENSG00000076201 | 1042.259841 | 1295.683454 | -0.313922237 | 0.186074907 | 0.291889877 | PTPN23      |
| ENSG00000277386 | 4.267876537 | 1.029478846 | 2.017636063  | 0.186079163 | 0.291889877 | AL138999.1  |
| ENSG00000256745 | 73.62858137 | 100.128215  | -0.4422212   | 0.18608106  | 0.291889877 | AP002784.2  |
| ENSG00000286024 | 8.821472029 | 3.882946823 | 1.172171741  | 0.18612682  | 0.291944029 | AC026803.3  |
| ENSG00000101132 | 386.7263897 | 489.8762679 | -0.341117991 | 0.186359907 | 0.292291985 | PFDN4       |
| ENSG00000230896 | 46.53860666 | 31.26888904 | 0.570676276  | 0.186397707 | 0.292333625 | AL604028.1  |
| ENSG00000235480 | 3.379378453 | 0           | 4.089557472  | 0.186514263 | 0.292481112 | AC013270.1  |
| ENSG00000211788 | 3.379378453 | 0           | 4.089557472  | 0.186514263 | 0.292481112 | TRAV13-1    |
| ENSG00000204650 | 7.929141728 | 2.375358513 | 1.71128972   | 0.186530731 | 0.292489283 | LINC02210   |
| ENSG00000257543 | 11.19762892 | 5.259508071 | 1.077731068  | 0.186723595 | 0.292774033 | AC063948.1  |
| ENSG00000248254 | 4.822874471 | 1.069617038 | 2.168358251  | 0.186806249 | 0.292884501 | AC107398.2  |
| ENSG00000279801 | 6.875560404 | 16.31208907 | -1.241433607 | 0.186816595 | 0.292884501 | AC111170.3  |
| ENSG00000260971 | 7.76287611  | 1.518200796 | 2.377271815  | 0.186865224 | 0.292943064 | AC119674.1  |
| ENSG00000226053 | 2.682005499 | 0.356539013 | 2.798439144  | 0.186878397 | 0.292946038 | LINC01776   |
| ENSG00000205488 | 3.993511692 | 0.356539013 | 3.368358117  | 0.186918402 | 0.29299107  | CALML3-AS1  |
| ENSG00000257831 | 7.569101141 | 2.884149558 | 1.394736892  | 0.187103535 | 0.293263571 | AL136418.1  |
| ENSG00000230658 | 13.097013   | 4.606637334 | 1.502534282  | 0.187258895 | 0.293489374 | KLHL7-DT    |
| ENSG00000258976 | 0.616711807 | 3.587770973 | -2.552102267 | 0.187288082 | 0.293517413 | AC013451.2  |
| ENSG00000243284 | 2.683259148 | 0.336469917 | 2.799003302  | 0.187345683 | 0.293589975 | VSIG8       |
| ENSG00000130377 | 5.789526405 | 1.783850939 | 1.693849024  | 0.187357337 | 0.293590529 | ACSBG2      |
| ENSG00000226455 | 3.364263397 | 0           | 4.083369349  | 0.187465642 | 0.293742527 | AL121787.1  |
| ENSG00000002016 | 233.8373766 | 177.1151107 | 0.401165342  | 0.18748128  | 0.293749314 | RAD52       |
| ENSG00000131381 | 785.7466137 | 645.941051  | 0.282707544  | 0.187590392 | 0.293891342 | RBSN        |
| ENSG00000284308 | 13.38635036 | 6.593490983 | 1.030553795  | 0.18759455  | 0.293891342 | C2orf81     |
| ENSG00000213638 | 44.9190293  | 67.50591594 | -0.590738955 | 0.187659756 | 0.293920876 | ADAT3       |
| ENSG00000143815 | 692.1812449 | 889.3924656 | -0.362039426 | 0.187669979 | 0.293920876 | LBR         |
| ENSG00000081320 | 262.4311484 | 438.5905244 | -0.741243511 | 0.18769254  | 0.293920876 | STK17B      |
| ENSG00000147408 | 850.5704793 | 676.3085814 | 0.330801481  | 0.187718467 | 0.293920876 | CSGALNACT1  |
| ENSG00000211786 | 3.079798091 | 0           | 3.955289135  | 0.187726531 | 0.293920876 | TRAV8-2     |
| ENSG00000211799 | 3.079798091 | 0           | 3.955289135  | 0.187726531 | 0.293920876 | TRAV19      |
| ENSG00000260035 | 3.079798091 | 0           | 3.955289135  | 0.187726531 | 0.293920876 | AC051619.8  |
| ENSG00000211997 | 3.079798091 | 0           | 3.955289135  | 0.187726531 | 0.293920876 | MIR708      |
| ENSG00000255258 | 3.079798091 | 0           | 3.955289135  | 0.187726531 | 0.293920876 | AP001979.2  |
| ENSG00000266573 | 3.079798091 | 0           | 3.955289135  | 0.187726531 | 0.293920876 | AC018697.1  |
| ENSG00000164292 | 2549.551011 | 3945.940967 | -0.630200317 | 0.187750052 | 0.293939989 | RHOBTB3     |
| ENSG00000196581 | 85.3686283  | 39.43377164 | 1.113116863  | 0.187834281 | 0.294054137 | AJAP1       |
| ENSG00000272734 | 79.30972382 | 113.2453575 | -0.511588773 | 0.187998741 | 0.294293866 | ADIRF-AS1   |
| ENSG00000251310 | 3.074783496 | 0           | 3.953061971  | 0.188083903 | 0.294394486 | AC107391.1  |
| ENSG00000263400 | 14.81097038 | 7.419967118 | 0.990373618  | 0.188085681 | 0.294394486 | TMEM220-AS1 |
| ENSG00000104660 | 977.2670441 | 754.6129526 | 0.372650666  | 0.188120426 | 0.294424534 | LEPROTL1    |
| ENSG00000138639 | 952.3975913 | 788.7066233 | 0.272429643  | 0.188127543 | 0.294424534 | ARHGAP24    |
| ENSG00000009844 | 800.6382456 | 996.2082713 | -0.315615264 | 0.188166859 | 0.294468326 | VTA1        |
| ENSG00000103599 | 18.63320186 | 30.31853071 | -0.70154065  | 0.188219409 | 0.294532823 | IQCH        |
| ENSG00000122121 | 15.99431896 | 5.656185276 | 1.49391649   | 0.188246618 | 0.29455766  | XPNPEP2     |
| ENSG00000231503 | 3.32769377  | 7.510855988 | -1.175397917 | 0.188306607 | 0.294633782 | PTMAP4      |
| ENSG00000104369 | 14.23842136 | 6.625456834 | 1.091234753  | 0.188402123 | 0.29476548  | JPH1        |
| ENSG00000201820 | 6.99021261  | 2.833398881 | 1.292826622  | 0.188491848 | 0.294888102 | RF00019     |
| ENSG00000168246 | 578.4374206 | 448.2844302 | 0.367987619  | 0.18850955  | 0.294898039 | UBTD2       |
| ENSG00000160685 | 784.5492608 | 630.0647501 | 0.3166759    | 0.188642781 | 0.295088692 | ZBTB7B      |

|                 |             |             |              |             |             |            |
|-----------------|-------------|-------------|--------------|-------------|-------------|------------|
| ENSG00000137709 | 4.262861942 | 1.10029862  | 1.967438129  | 0.188657125 | 0.295090892 | POU2F3     |
| ENSG00000205746 | 134.3038219 | 93.07231695 | 0.529326399  | 0.188666903 | 0.295090892 | AC126755.1 |
| ENSG00000124459 | 217.5577656 | 170.5516118 | 0.350550859  | 0.188700048 | 0.295124967 | ZNF45      |
| ENSG00000234618 | 10.3594906  | 19.33445773 | -0.907558697 | 0.188749667 | 0.295184801 | RPSAP9     |
| ENSG00000107593 | 3.001715513 | 0           | 3.920174413  | 0.188822102 | 0.295280307 | PKD2L1     |
| ENSG00000005889 | 735.1936116 | 555.6500508 | 0.404098826  | 0.188877535 | 0.295323803 | ZFX        |
| ENSG00000236842 | 3.01557692  | 0           | 3.926461087  | 0.188881621 | 0.295323803 | AC010997.2 |
| ENSG00000156304 | 552.2030355 | 672.4186184 | -0.283794373 | 0.188884017 | 0.295323803 | SCAF4      |
| ENSG00000224072 | 8.758504507 | 3.566546002 | 1.293057135  | 0.188966421 | 0.295432479 | AL139811.1 |
| ENSG00000129682 | 77.14477826 | 30.32400611 | 1.349565099  | 0.188976266 | 0.295432479 | FGF13      |
| ENSG00000231345 | 9.920113788 | 24.02034397 | -1.277656701 | 0.189030621 | 0.295499673 | BEND3P1    |
| ENSG00000124224 | 349.1139371 | 230.0112151 | 0.603008362  | 0.189222757 | 0.29578223  | PPP4R1L    |
| ENSG00000188848 | 3.687734357 | 0.336469917 | 3.253213077  | 0.189269054 | 0.295809143 | BEND4      |
| ENSG00000273335 | 6.613803318 | 2.241891306 | 1.58563413   | 0.189280663 | 0.295809143 | AP005432.2 |
| ENSG00000269952 | 10.68922981 | 4.596024848 | 1.208055114  | 0.189294289 | 0.295809143 | AL117336.1 |
| ENSG00000224295 | 8.172022812 | 3.291439249 | 1.322732913  | 0.189294405 | 0.295809143 | OLFM5P     |
| ENSG00000196975 | 1450.731722 | 1190.287537 | 0.285264693  | 0.189296902 | 0.295809143 | ANXA4      |
| ENSG00000227788 | 4.274216052 | 0.774441189 | 2.511523296  | 0.189390434 | 0.295937504 | MTCO3P43   |
| ENSG00000287665 | 0.616711807 | 3.637365776 | -2.569361122 | 0.189407136 | 0.295945802 | AC092428.1 |
| ENSG00000130254 | 1525.31062  | 1257.258031 | 0.278909964  | 0.189454472 | 0.296001962 | SAFB2      |
| ENSG00000196628 | 1775.419299 | 1003.055399 | 0.82362913   | 0.189482405 | 0.296027803 | TCF4       |
| ENSG00000248636 | 5.186676005 | 17.35192361 | -1.740012794 | 0.189545089 | 0.296107928 | AC002070.1 |
| ENSG00000272807 | 19.94352567 | 11.79048002 | 0.75646872   | 0.189619048 | 0.296205658 | AC007038.2 |
| ENSG00000185495 | 162.3628849 | 111.4729366 | 0.542119623  | 0.189780085 | 0.29643551  | AC138393.1 |
| ENSG00000162004 | 61.64944214 | 84.65958873 | -0.460195452 | 0.18978901  | 0.29643551  | CCDC78     |
| ENSG00000258824 | 18.07318933 | 10.42568713 | 0.796203909  | 0.189979064 | 0.296714522 | AL122035.1 |
| ENSG00000229990 | 0.600343103 | 2.904218654 | -2.263625824 | 0.19022755  | 0.297084754 | AC022400.2 |
| ENSG00000273628 | 6.213503428 | 1.10029862  | 2.509262054  | 0.190312883 | 0.297200157 | AL354798.1 |
| ENSG00000226334 | 3.943151929 | 9.923912548 | -1.3269864   | 0.190509491 | 0.297480229 | AL359182.1 |
| ENSG00000286034 | 0           | 2.731897526 | -4.035831563 | 0.190534372 | 0.297480229 | AC100822.1 |
| ENSG00000231756 | 0           | 2.731897526 | -4.035831563 | 0.190534372 | 0.297480229 | AL449983.1 |
| ENSG00000232642 | 4.486795753 | 1.130980201 | 2.023319193  | 0.190553097 | 0.297480229 | AC008073.2 |
| novel.333       | 2.9928687   | 0           | 3.916136008  | 0.19056152  | 0.297480229 | -          |
| ENSG00000135625 | 2.9928687   | 0           | 3.916136008  | 0.19056152  | 0.297480229 | EGR4       |
| ENSG00000269720 | 6.69947906  | 2.567748738 | 1.395599198  | 0.190572377 | 0.297480229 | CCDC194    |
| ENSG00000140320 | 560.3621937 | 463.9590129 | 0.272734659  | 0.190588895 | 0.29748814  | BAHD1      |
| ENSG00000142444 | 301.6334077 | 385.1445793 | -0.352471633 | 0.190669593 | 0.297596221 | TIMM29     |
| ENSG00000287918 | 7.929141728 | 2.406040094 | 1.699480726  | 0.190723113 | 0.297647482 | AF274853.1 |
| ENSG00000102970 | 3.038213869 | 0           | 3.936673302  | 0.190725349 | 0.297647482 | CCL17      |
| ENSG00000101384 | 857.3880076 | 402.4913433 | 1.090666116  | 0.190821341 | 0.297779401 | JAG1       |
| ENSG00000261242 | 3.916682763 | 0.672939833 | 2.49750561   | 0.190841372 | 0.297792773 | AL136038.3 |
| ENSG00000178234 | 1092.407581 | 840.0992149 | 0.378961168  | 0.190896866 | 0.297861478 | GALNT11    |
| ENSG00000235724 | 4.207416313 | 1.10029862  | 1.951899908  | 0.190970977 | 0.297958358 | AC009299.3 |
| ENSG00000186448 | 16.81455019 | 8.846123169 | 0.922116789  | 0.190981892 | 0.297958358 | ZNF197     |
| ENSG00000268030 | 23.44096127 | 37.56129641 | -0.676817253 | 0.191005932 | 0.297977971 | AC005253.1 |
| ENSG00000236947 | 3.328947419 | 0.743759607 | 2.190779891  | 0.191036126 | 0.29800718  | AL139412.1 |
| ENSG00000162618 | 250.1330834 | 494.5189114 | -0.983733676 | 0.191100062 | 0.29808902  | ADGRL4     |
| ENSG00000130810 | 130.9840773 | 185.0988107 | -0.497454608 | 0.191219925 | 0.298243897 | PPAN       |
| ENSG00000196998 | 698.183181  | 567.8978952 | 0.298434341  | 0.19122231  | 0.298243897 | WDR45      |
| ENSG00000182986 | 74.91089764 | 54.98904848 | 0.446952128  | 0.191298616 | 0.298345    | ZNF320     |
| ENSG00000271833 | 11.14852281 | 4.698682079 | 1.251065696  | 0.191327514 | 0.29836178  | AL445222.1 |

|                 |             |             |              |             |             |            |
|-----------------|-------------|-------------|--------------|-------------|-------------|------------|
| ENSG00000176095 | 992.9156268 | 1188.617714 | -0.259704554 | 0.191345681 | 0.29836178  | IP6K1      |
| ENSG00000196932 | 6.442736568 | 1.803920035 | 1.837290746  | 0.191349923 | 0.29836178  | TMEM26     |
| ENSG00000261367 | 3.029438327 | 0           | 3.932726389  | 0.191366795 | 0.29836178  | AC012645.2 |
| ENSG00000261292 | 3.029438327 | 0           | 3.932726389  | 0.191366795 | 0.29836178  | AC110491.1 |
| ENSG00000196663 | 706.3389498 | 868.8786578 | -0.298475962 | 0.191389716 | 0.298379611 | TECPR2     |
| ENSG00000214973 | 1.541779519 | 6.430626464 | -2.068721847 | 0.191424024 | 0.298415191 | CHCHD3P3   |
| ENSG00000177855 | 5.787019107 | 11.44455349 | -0.988078038 | 0.191472647 | 0.298468146 | CACYBPP2   |
| ENSG00000130055 | 10.40490704 | 3.597227584 | 1.531643104  | 0.191480969 | 0.298468146 | GDPD2      |
| ENSG00000275549 | 5.420710276 | 1.793307549 | 1.596457708  | 0.191497471 | 0.298475962 | STPG3-AS1  |
| ENSG00000178096 | 337.6206154 | 264.8092217 | 0.349517902  | 0.191514532 | 0.298484647 | BOLA1      |
| ENSG00000261207 | 10.19949323 | 19.42175058 | -0.92574656  | 0.191540844 | 0.298507748 | AL031717.1 |
| ENSG00000129654 | 5.654744548 | 0.774441189 | 2.906641706  | 0.191631971 | 0.298631852 | FOXJ1      |
| ENSG00000172992 | 480.1967367 | 613.0312136 | -0.352826714 | 0.191686892 | 0.298679697 | DCAKD      |
| ENSG00000235192 | 2.432856171 | 0.356539013 | 2.653500555  | 0.191697161 | 0.298679697 | AC009495.3 |
| ENSG00000211696 | 2.432856171 | 0.356539013 | 2.653500555  | 0.191697161 | 0.298679697 | TRGV8      |
| ENSG00000113805 | 12.89431995 | 4.545274171 | 1.493696412  | 0.191771756 | 0.298770446 | CNTN3      |
| ENSG00000066322 | 1887.479368 | 2336.035134 | -0.307745408 | 0.191778405 | 0.298770446 | ELOVL1     |
| ENSG00000205309 | 83.70296593 | 58.03747522 | 0.527228578  | 0.192183779 | 0.299367116 | NT5M       |
| ENSG00000184584 | 988.7332932 | 1481.397394 | -0.583449409 | 0.192184448 | 0.299367116 | TMEM173    |
| ENSG00000250764 | 14.10106093 | 6.664310756 | 1.096247286  | 0.192316442 | 0.299554765 | AC025178.1 |
| ENSG00000228238 | 8.217367981 | 2.0188195   | 1.998590202  | 0.192330031 | 0.299557973 | AL096803.1 |
| ENSG00000173276 | 353.7221081 | 482.4701454 | -0.447115273 | 0.192393522 | 0.299627462 | ZBTB21     |
| ENSG00000166439 | 228.0929819 | 158.4748518 | 0.526370128  | 0.19241939  | 0.299627462 | RNF169     |
| novel.848       | 5.278335256 | 0           | 4.734689641  | 0.192429906 | 0.299627462 | -          |
| ENSG00000018607 | 5.278335256 | 0           | 4.734689641  | 0.192429906 | 0.299627462 | ZNF806     |
| ENSG00000060749 | 994.2559249 | 809.8165837 | 0.29598303   | 0.192432309 | 0.299627462 | QSER1      |
| ENSG00000232656 | 32.70661125 | 17.8728682  | 0.871723766  | 0.192455306 | 0.299645311 | IDI2-AS1   |
| ENSG00000254860 | 144.2975453 | 89.42446709 | 0.690155147  | 0.19248106  | 0.29966034  | TMEM9B-AS1 |
| ENSG00000113595 | 406.6069478 | 330.291729  | 0.300201853  | 0.192488026 | 0.29966034  | TRIM23     |
| ENSG00000238160 | 1.230916317 | 4.320918095 | -1.82101205  | 0.192589882 | 0.299800942 | AC116366.2 |
| ENSG00000269967 | 4.572471495 | 1.436768536 | 1.668358639  | 0.192755864 | 0.300041346 | AL136115.2 |
| ENSG00000256262 | 3.983482502 | 0.672939833 | 2.520119303  | 0.192801021 | 0.300093657 | USP30-AS1  |
| ENSG00000172379 | 1543.647964 | 1005.835335 | 0.618114758  | 0.192893898 | 0.300220234 | ARNT2      |
| ENSG00000112697 | 4310.412791 | 5455.978293 | -0.339998319 | 0.192939372 | 0.300259425 | TMEM30A    |
| ENSG00000124731 | 23.93417406 | 11.3004738  | 1.08801705   | 0.192942192 | 0.300259425 | TREM1      |
| ENSG00000287644 | 0           | 2.882993683 | -4.108555686 | 0.192970725 | 0.300285842 | AC080112.4 |
| ENSG00000278108 | 2.376156893 | 7.409354633 | -1.635975337 | 0.193033146 | 0.300364985 | MIR6757    |
| ENSG00000198791 | 1220.521934 | 1502.009104 | -0.299551062 | 0.193139562 | 0.300512575 | CNOT7      |
| ENSG00000213994 | 3.385646697 | 0.387220594 | 3.129477468  | 0.193152486 | 0.300514686 | AL157395.1 |
| ENSG00000215097 | 7.492272212 | 2.822786395 | 1.400751277  | 0.19320631  | 0.300580428 | AL731733.1 |
| ENSG00000130700 | 3.384393048 | 0.387220594 | 3.128986723  | 0.193226802 | 0.300594308 | GATA5      |
| ENSG00000258704 | 13.8569262  | 23.76389365 | -0.775616884 | 0.193300291 | 0.300690627 | SRP54-AS1  |
| ENSG00000246366 | 2.3900183   | 6.521515334 | -1.438075921 | 0.193336121 | 0.300728357 | LACTB2-AS1 |
| ENSG00000234518 | 159.4988576 | 106.5060358 | 0.583086664  | 0.193394489 | 0.300801139 | PTGES3P1   |
| ENSG00000227053 | 2.12199297  | 7.327793979 | -1.784679186 | 0.193432951 | 0.300842951 | AC105446.1 |
| ENSG00000184785 | 319.9134783 | 216.518376  | 0.561994921  | 0.193488603 | 0.300911493 | SMIM10     |
| ENSG00000205361 | 2.417741115 | 0.336469917 | 2.646043071  | 0.193509967 | 0.300926704 | MT1DP      |
| ENSG00000133606 | 1613.649134 | 1325.97784  | 0.28343757   | 0.193700707 | 0.301192848 | MKRN1      |
| ENSG00000213197 | 4.164578442 | 0.713078025 | 2.543269853  | 0.193704296 | 0.301192848 | AC012066.1 |
| ENSG00000170234 | 452.8119556 | 345.3173753 | 0.391818648  | 0.19378809  | 0.301294476 | PWWP2A     |
| ENSG00000175505 | 254.7704637 | 420.7979798 | -0.723684758 | 0.193792848 | 0.301294476 | CLCF1      |

|                 |             |             |              |             |             |            |
|-----------------|-------------|-------------|--------------|-------------|-------------|------------|
| ENSG00000183597 | 320.8378058 | 256.1684942 | 0.324157482  | 0.193956468 | 0.301530816 | TANGO2     |
| ENSG00000272181 | 5.478663203 | 1.854670712 | 1.583276708  | 0.193977492 | 0.301545457 | AC012557.2 |
| ENSG00000201499 | 9.090751008 | 2.882993683 | 1.657661322  | 0.193990387 | 0.301546972 | RNU6-312P  |
| ENSG00000242445 | 1.509042109 | 4.809640044 | -1.660323749 | 0.19400168  | 0.301546972 | RPL7AP11   |
| ENSG00000198482 | 108.8342078 | 71.93034317 | 0.598934226  | 0.194017455 | 0.301553452 | ZNF808     |
| ENSG00000167380 | 404.0933314 | 328.3399236 | 0.300304882  | 0.194178645 | 0.30178593  | ZNF226     |
| ENSG00000282855 | 5.106014858 | 0.672939833 | 2.88981333   | 0.194271148 | 0.301911634 | AC093591.3 |
| ENSG00000130349 | 225.5577528 | 296.723965  | -0.396504616 | 0.194333405 | 0.301990323 | C6orf203   |
| ENSG00000257790 | 0.894837599 | 4.444928691 | -2.313329913 | 0.19441164  | 0.302093829 | EIF4A1P4   |
| ENSG00000213149 | 2.668144092 | 7.480174406 | -1.47929743  | 0.194424019 | 0.302094996 | CNN2P9     |
| ENSG00000128272 | 6544.100415 | 5260.482041 | 0.314972131  | 0.194511833 | 0.302213368 | ATF4       |
| ENSG00000254929 | 0.89358395  | 3.597227584 | -1.997094255 | 0.194601124 | 0.302322162 | AL591684.2 |
| ENSG00000236924 | 3.08105174  | 0           | 3.95589051   | 0.194628401 | 0.302322162 | AL162411.1 |
| ENSG00000215475 | 3.08105174  | 0           | 3.95589051   | 0.194628401 | 0.302322162 | SIAH3      |
| ENSG00000200488 | 3.08105174  | 0           | 3.95589051   | 0.194628401 | 0.302322162 | RN7SKP203  |
| ENSG00000143258 | 517.0851652 | 428.2303916 | 0.272188022  | 0.194653895 | 0.302343686 | USP21      |
| novel.153       | 3.637303322 | 0.672939833 | 2.38699273   | 0.194678856 | 0.30236438  | -          |
| ENSG00000126653 | 892.1707886 | 745.2586678 | 0.259666875  | 0.194721897 | 0.302413152 | NSRP1      |
| ENSG00000187950 | 3.605819561 | 11.70087542 | -1.701134647 | 0.194808147 | 0.302529018 | OVCH1      |
| ENSG00000229122 | 6.33191658  | 13.22596428 | -1.054915962 | 0.194871264 | 0.302608948 | AGBL5-IT1  |
| ENSG00000286626 | 3.632288727 | 0.672939833 | 2.385275235  | 0.194936701 | 0.302692471 | AC090469.1 |
| ENSG00000240891 | 35.67608755 | 74.22820377 | -1.055854218 | 0.194960909 | 0.302711968 | PLCXD2     |
| ENSG00000178125 | 7.65728418  | 1.682349583 | 2.158922029  | 0.195011968 | 0.302773152 | PPP1R42    |
| ENSG00000118680 | 5434.69245  | 6955.17863  | -0.355934544 | 0.19508709  | 0.302871688 | MYL12B     |
| ENSG00000109072 | 17.45808717 | 6.717501579 | 1.372998231  | 0.195168011 | 0.302912785 | VTN        |
| ENSG00000253706 | 3.073529847 | 0           | 3.95254312   | 0.195171857 | 0.302912785 | AC011632.1 |
| novel.740       | 3.073529847 | 0           | 3.95254312   | 0.195171857 | 0.302912785 | -          |
| ENSG00000274624 | 3.073529847 | 0           | 3.95254312   | 0.195171857 | 0.302912785 | AC007671.1 |
| ENSG00000170128 | 3.073529847 | 0           | 3.95254312   | 0.195171857 | 0.302912785 | GPR25      |
| ENSG00000254521 | 2.977753644 | 0           | 3.909206869  | 0.195217279 | 0.302947086 | SIGLEC12   |
| ENSG00000228141 | 2.977753644 | 0           | 3.909206869  | 0.195217279 | 0.302947086 | AC105339.1 |
| ENSG00000287647 | 5.924023527 | 1.386017859 | 2.0801727    | 0.195359829 | 0.303144921 | AC093575.1 |
| ENSG00000276651 | 3.386900346 | 0.387220594 | 3.129992947  | 0.195368098 | 0.303144921 | AC007950.2 |
| ENSG00000158220 | 24.17518859 | 11.94517219 | 1.00970838   | 0.195407206 | 0.303187496 | ESYT3      |
| ENSG00000173482 | 1046.369286 | 1262.462455 | -0.270859669 | 0.195426569 | 0.303189283 | PTPRM      |
| ENSG00000278716 | 0           | 1.823989131 | -3.445121459 | 0.195437005 | 1           | AC133540.1 |
| ENSG00000177202 | 0           | 1.823989131 | -3.445121459 | 0.195437005 | 1           | SPACA4     |
| ENSG00000236065 | 0           | 1.823989131 | -3.445121459 | 0.195437005 | 1           | AL020995.1 |
| ENSG00000223305 | 0           | 1.823989131 | -3.445121459 | 0.195437005 | 1           | RN7SKP30   |
| ENSG00000212384 | 0           | 1.823989131 | -3.445121459 | 0.195437005 | 1           | SNORD113-2 |
| ENSG00000254303 | 0           | 1.823989131 | -3.445121459 | 0.195437005 | 1           | AC037486.1 |
| ENSG00000233055 | 3.827246074 | 0.356539013 | 3.310733277  | 0.195445737 | 0.303189283 | AL353621.1 |
| ENSG00000136425 | 72.66088925 | 49.55696249 | 0.555047549  | 0.19548414  | 0.303189283 | CIB2       |
| ENSG00000129214 | 25.50786462 | 13.1895505  | 0.941292238  | 0.195491766 | 0.303189283 | SHBG       |
| ENSG00000259937 | 2.973992698 | 0           | 3.907486289  | 0.195501715 | 0.303189283 | AC023158.1 |
| ENSG00000162947 | 2.973992698 | 0           | 3.907486289  | 0.195501715 | 0.303189283 | LINC01931  |
| ENSG00000237990 | 2.973992698 | 0           | 3.907486289  | 0.195501715 | 0.303189283 | CNTN4-AS1  |
| ENSG00000235426 | 2.973992698 | 0           | 3.907486289  | 0.195501715 | 0.303189283 | AL133481.1 |
| ENSG00000273209 | 3.3831394   | 0.387220594 | 3.128519034  | 0.195593048 | 0.30331282  | AC069148.1 |
| ENSG00000280268 | 3.239510731 | 0           | 4.031308181  | 0.195612147 | 0.303314729 | AC025125.1 |
| ENSG00000154529 | 17.48706364 | 44.30528843 | -1.344142083 | 0.195629225 | 0.303314729 | CNTNAP3B   |

|                 |             |             |              |             |             |            |
|-----------------|-------------|-------------|--------------|-------------|-------------|------------|
| ENSG00000127980 | 340.1998648 | 270.4273577 | 0.331134881  | 0.195629303 | 0.303314729 | PEX1       |
| novel.983       | 5.220738334 | 0           | 4.717537462  | 0.195667788 | 0.303355497 | -          |
| ENSG00000154493 | 11.36278343 | 46.35397196 | -2.028790465 | 0.195678949 | 0.303355497 | C10orf90   |
| ENSG00000280239 | 24.36978993 | 40.34612796 | -0.723602    | 0.19577343  | 0.30348386  | AC011498.7 |
| ENSG00000231830 | 2.43410982  | 0.387220594 | 2.654144497  | 0.195831165 | 0.303555248 | AC245140.1 |
| ENSG00000183114 | 10.47908613 | 37.27275184 | -1.830696022 | 0.195896622 | 0.303631517 | FAM43B     |
| ENSG00000252473 | 8.018293682 | 2.506385574 | 1.679025265  | 0.195903742 | 0.303631517 | RF00272    |
| novel.433       | 58.3001516  | 34.73239263 | 0.750893186  | 0.195992093 | 0.303750332 | -          |
| novel.165       | 2.431602522 | 0.387220594 | 2.652912636  | 0.196025007 | 0.303781429 | -          |
| ENSG00000224959 | 1.511549406 | 5.084746798 | -1.746165258 | 0.196035543 | 0.303781429 | AC017002.1 |
| ENSG00000110911 | 955.9151291 | 1341.1552   | -0.488264578 | 0.196100457 | 0.303863898 | SLC11A2    |
| ENSG00000227811 | 2.449224876 | 6.461308046 | -1.405596421 | 0.196123991 | 0.303868818 | INKA2-AS1  |
| ENSG00000257438 | 3.65116473  | 0.713078025 | 2.349288947  | 0.196127024 | 0.303868818 | AC011595.1 |
| ENSG00000109689 | 625.3407797 | 421.4993835 | 0.568583403  | 0.196147282 | 0.303882083 | STIM2      |
| ENSG00000213089 | 7.646001342 | 1.782695063 | 2.095975904  | 0.196168641 | 0.303885515 | PDCL3P5    |
| ENSG00000198468 | 32.20107543 | 18.98737533 | 0.754954868  | 0.19617289  | 0.303885515 | FLVCR1-DT  |
| ENSG00000227782 | 15.38240829 | 8.254615595 | 0.899015391  | 0.196252154 | 0.30396315  | AC002553.1 |
| novel.802       | 3.575589449 | 0.743759607 | 2.294650596  | 0.196254568 | 0.30396315  | -          |
| ENSG00000268601 | 4.25401513  | 1.049547942 | 1.99986035   | 0.196258106 | 0.30396315  | AC115522.1 |
| ENSG00000272084 | 16.55662533 | 8.702043477 | 0.933606027  | 0.196278906 | 0.303977244 | AL137127.1 |
| ENSG00000049883 | 277.7714471 | 338.7795621 | -0.287089197 | 0.196507933 | 0.304313799 | PTCD2      |
| ENSG00000268858 | 73.10123498 | 95.57271354 | -0.387873126 | 0.196638837 | 0.304453892 | AL118506.1 |
| ENSG00000225689 | 3.053328925 | 0           | 3.943485821  | 0.19664527  | 0.304453892 | AL008633.1 |
| ENSG00000206633 | 3.053328925 | 0           | 3.943485821  | 0.19664527  | 0.304453892 | SNORA80B   |
| ENSG00000277863 | 3.053328925 | 0           | 3.943485821  | 0.19664527  | 0.304453892 | AL162574.1 |
| ENSG00000258604 | 2.142122621 | 0           | 3.431266842  | 0.196729009 | 1           | AL161668.4 |
| ENSG00000096746 | 2728.711569 | 3338.102195 | -0.290914976 | 0.196794503 | 0.304666784 | HNRNPH3    |
| ENSG00000157335 | 2.43410982  | 0.356539013 | 2.654151611  | 0.196807377 | 0.304668561 | CLEC18C    |
| ENSG00000243477 | 166.8414742 | 226.5569585 | -0.440009184 | 0.196868245 | 0.304734341 | NAA80      |
| ENSG00000006062 | 491.7234793 | 308.6590851 | 0.671147552  | 0.196886537 | 0.304734341 | MAP3K14    |
| ENSG00000272764 | 11.82318754 | 6.124838129 | 0.950768119  | 0.196887978 | 0.304734341 | AL596094.1 |
| ENSG00000010017 | 821.0431164 | 697.5363541 | 0.235101886  | 0.196896785 | 0.304734341 | RANBP9     |
| ENSG00000108061 | 792.4567352 | 969.3606459 | -0.291025853 | 0.196916651 | 0.304746932 | SHOC2      |
| ENSG00000188599 | 78.01945873 | 51.45690847 | 0.598878739  | 0.197033544 | 0.304909674 | NPIPP1     |
| ENSG00000139725 | 23.7546165  | 44.54774018 | -0.905518114 | 0.197074989 | 0.304955645 | RHOF       |
| ENSG00000232821 | 3.083559037 | 11.93327544 | -1.956055674 | 0.197161146 | 0.305070795 | AC003986.2 |
| ENSG00000255036 | 2.137108026 | 0           | 3.428225064  | 0.197240366 | 1           | STRA6LP    |
| ENSG00000229409 | 2.137108026 | 0           | 3.428225064  | 0.197240366 | 1           | AL117328.1 |
| ENSG00000282886 | 2.137108026 | 0           | 3.428225064  | 0.197240366 | 1           | PTMAP12    |
| ENSG00000275672 | 2.137108026 | 0           | 3.428225064  | 0.197240366 | 1           | AC025580.3 |
| ENSG00000135406 | 2.137108026 | 0           | 3.428225064  | 0.197240366 | 1           | PRPH       |
| ENSG00000257218 | 310.2015425 | 421.3683904 | -0.44254112  | 0.197297691 | 0.305263894 | GATC       |
| ENSG00000100906 | 2087.556585 | 3050.381267 | -0.547067546 | 0.197311325 | 0.30526681  | NFKBIA     |
| ENSG00000256968 | 0.908699006 | 3.537020296 | -1.965605193 | 0.197330878 | 0.305278882 | SNRPEP2    |
| ENSG00000172346 | 14.21438822 | 26.34353914 | -0.891338561 | 0.197378124 | 0.305320311 | CSDC2      |
| ENSG00000164338 | 261.9916457 | 363.2059243 | -0.471965791 | 0.197381161 | 0.305320311 | UTP15      |
| ENSG00000187144 | 4.514518568 | 1.467450118 | 1.639692374  | 0.197403895 | 0.305337298 | SPATA21    |
| ENSG00000018869 | 62.79586509 | 42.9779368  | 0.543926722  | 0.197504172 | 0.305474217 | ZNF582     |
| ENSG00000247572 | 126.2902146 | 164.696277  | -0.381795911 | 0.197517658 | 0.30547689  | CKMT2-AS1  |
| ENSG00000286913 | 2.096777453 | 5.717548439 | -1.442202919 | 0.197563656 | 0.305529841 | AC092943.2 |
| ENSG00000189266 | 2171.988032 | 1793.006658 | 0.27648381   | 0.197626064 | 0.305608164 | PNRC2      |

|                 |             |             |              |             |             |             |
|-----------------|-------------|-------------|--------------|-------------|-------------|-------------|
| ENSG00000287859 | 3.88645265  | 0.672939833 | 2.488373906  | 0.197677536 | 0.305669566 | AC008507.4  |
| ENSG00000107362 | 194.0320972 | 242.3068557 | -0.320276664 | 0.197767343 | 0.305784679 | ABHD17B     |
| ENSG00000144339 | 5.230767524 | 22.80438267 | -2.12811604  | 0.197775518 | 0.305784679 | TMEFF2      |
| novel.415       | 28.06261015 | 45.34627885 | -0.695073774 | 0.197846147 | 0.305875676 | -           |
| ENSG00000237413 | 0           | 1.803920035 | -3.431144777 | 0.197890253 | 1           | AC096531.2  |
| ENSG00000228016 | 0           | 1.803920035 | -3.431144777 | 0.197890253 | 1           | RAPGEF4-AS1 |
| ENSG00000230183 | 0           | 1.803920035 | -3.431144777 | 0.197890253 | 1           | CNOT6LP1    |
| ENSG00000154839 | 0           | 1.803920035 | -3.431144777 | 0.197890253 | 1           | SKA1        |
| ENSG00000107282 | 33.35007695 | 18.58466196 | 0.847100745  | 0.197966922 | 0.306044186 | APBA1       |
| ENSG00000241278 | 11.05149296 | 4.381125383 | 1.343840278  | 0.19803656  | 0.306121796 | ENPP7P4     |
| ENSG00000235397 | 0.879722543 | 4.280779903 | -2.265873773 | 0.198040689 | 0.306121796 | EPN2-AS1    |
| ENSG00000112584 | 40.07853213 | 17.71334292 | 1.178544728  | 0.198061773 | 0.306136173 | FAM120B     |
| ENSG00000099256 | 202.5730074 | 164.4404686 | 0.301468628  | 0.198080399 | 0.306146749 | PRTFDC1     |
| ENSG00000273682 | 4.148209737 | 0.672939833 | 2.586072278  | 0.198262438 | 0.306409875 | AC109583.2  |
| ENSG00000234902 | 1.481319294 | 5.553399651 | -1.889262005 | 0.198302007 | 0.306452798 | AC007879.3  |
| ENSG00000176054 | 14.17914351 | 7.46010531  | 0.92225423   | 0.198333787 | 0.30648368  | RPL23P2     |
| ENSG00000115274 | 15.14579545 | 8.35611695  | 0.86420495   | 0.198384258 | 0.306543441 | INO80B      |
| ENSG00000226124 | 21.96751987 | 11.98531038 | 0.865871393  | 0.198403573 | 0.306555053 | FTCDNL1     |
| ENSG00000224424 | 20.60056805 | 12.57553369 | 0.712441182  | 0.198424599 | 0.30656931  | PRKAR2A-AS1 |
| ENSG00000122484 | 319.3390777 | 394.3756922 | -0.304756342 | 0.198444205 | 0.306570128 | RPAP2       |
| ENSG00000233926 | 3.605819561 | 0.713078025 | 2.333803241  | 0.198448728 | 0.306570128 | AL591368.1  |
| ENSG00000258870 | 0.586481695 | 3.32212083  | -2.473976694 | 0.198648689 | 0.306860788 | EIF4EBP1P1  |
| ENSG00000135457 | 768.9594025 | 637.1620832 | 0.270820537  | 0.19870241  | 0.306925524 | TFCP2       |
| ENSG00000164654 | 587.3952991 | 454.9694177 | 0.368117446  | 0.198735976 | 0.306959122 | MIOS        |
| ENSG00000266998 | 0.909952655 | 3.993904788 | -2.132578343 | 0.198823673 | 0.30707632  | AC111182.1  |
| ENSG00000169330 | 40.40576438 | 61.77017779 | -0.61114437  | 0.198850625 | 0.30709969  | MINAR1      |
| ENSG00000253746 | 3.699017196 | 12.57424942 | -1.766723297 | 0.199114722 | 0.307489277 | AC091182.2  |
| ENSG00000279598 | 0.308355904 | 2.944356846 | -3.173785093 | 0.199188641 | 0.307585145 | AC009948.4  |
| ENSG00000246334 | 8.218621629 | 16.80196689 | -1.029837614 | 0.199403111 | 0.307898029 | PRR7-AS1    |
| ENSG00000205111 | 5.732827126 | 1.702418679 | 1.721111576  | 0.199577614 | 0.308149165 | CDKL4       |
| ENSG00000084628 | 4.614055717 | 13.7559803  | -1.575947364 | 0.199828274 | 0.30851785  | NKAIN1      |
| ENSG00000199550 | 2.403879708 | 0.336469917 | 2.639116661  | 0.199858533 | 0.308546233 | RF00019     |
| ENSG00000260509 | 4.285498891 | 0.713078025 | 2.580706249  | 0.199890925 | 0.308577904 | AL590787.1  |
| ENSG00000135535 | 4401.773935 | 5463.561175 | -0.311772747 | 0.200125021 | 0.308905009 | CD164       |
| novel.694       | 0.308355904 | 3.036401591 | -3.214034459 | 0.200126597 | 0.308905009 | -           |
| ENSG00000182551 | 594.1810783 | 458.8839452 | 0.372206768  | 0.200153893 | 0.308928788 | ADI1        |
| ENSG00000233901 | 104.3970163 | 66.01613215 | 0.657882878  | 0.200178793 | 0.308948866 | LINC01503   |
| ENSG00000260388 | 6.404984563 | 2.058957692 | 1.610096381  | 0.200251148 | 0.309042178 | LINC00562   |
| ENSG00000128159 | 1471.952855 | 1157.138536 | 0.347321132  | 0.20027389  | 0.309049103 | TUBGCP6     |
| ENSG00000163961 | 287.8834415 | 353.8298195 | -0.29814061  | 0.200279425 | 0.309049103 | RNF168      |
| ENSG00000100387 | 1336.093689 | 1609.211967 | -0.26840828  | 0.200303547 | 0.309067969 | RBX1        |
| ENSG00000283031 | 8.991213859 | 3.251301057 | 1.472529698  | 0.200359292 | 0.309135624 | AC009242.1  |
| ENSG00000234367 | 1.539272221 | 5.430673325 | -1.825623101 | 0.200375054 | 0.309141585 | PFN1P3      |
| ENSG00000288045 | 16.62335379 | 8.35740122  | 0.980005534  | 0.200426813 | 0.309203078 | AL352979.4  |
| ENSG00000272175 | 0           | 2.618499415 | -3.965921447 | 0.200456    | 1           | AL050343.2  |
| ENSG00000243574 | 0           | 2.618499415 | -3.965921447 | 0.200456    | 1           | AC006148.2  |
| ENSG00000264006 | 0           | 2.618499415 | -3.965921447 | 0.200456    | 1           | AKR1C8P     |
| ENSG00000287872 | 0           | 2.618499415 | -3.965921447 | 0.200456    | 1           | AC026956.2  |
| ENSG00000131737 | 0           | 2.618499415 | -3.965921447 | 0.200456    | 1           | KRT34       |
| ENSG00000134758 | 430.7138696 | 350.4554069 | 0.297005851  | 0.200553683 | 0.309380432 | RNF138      |
| ENSG00000244018 | 0.293240848 | 3.036401591 | -3.214053486 | 0.200578534 | 0.309400397 | RPL35P6     |

|                 |             |             |              |             |             |             |
|-----------------|-------------|-------------|--------------|-------------|-------------|-------------|
| ENSG00000106591 | 790.631502  | 1007.04773  | -0.349355381 | 0.200651556 | 0.309494661 | MRPL32      |
| ENSG00000135972 | 219.0062762 | 281.7991309 | -0.364542948 | 0.200667893 | 0.309501486 | MRPS9       |
| ENSG00000143393 | 1906.267371 | 1585.472065 | 0.265969642  | 0.200702947 | 0.30952468  | PI4KB       |
| ENSG00000163682 | 5268.584493 | 6976.895476 | -0.405117212 | 0.200706758 | 0.30952468  | RPL9        |
| ENSG00000051523 | 3881.833145 | 5293.788371 | -0.447535907 | 0.20073474  | 0.309549458 | CYBA        |
| ENSG00000153292 | 1.843867178 | 8.986478447 | -2.285791125 | 0.200910619 | 0.30980229  | ADGRF1      |
| ENSG00000229036 | 59.13564008 | 38.75864845 | 0.605513825  | 0.201008819 | 0.309935319 | VDAC1P8     |
| ENSG00000283162 | 0.925067711 | 6.275934287 | -2.766734559 | 0.201103318 | 0.310046112 | AL390726.5  |
| ENSG00000225778 | 8.153075539 | 3.546476906 | 1.194386731  | 0.201104541 | 0.310046112 | PROSER2-AS1 |
| ENSG00000114648 | 368.118233  | 447.824125  | -0.283244165 | 0.201166201 | 0.310122037 | KLHL18      |
| ENSG00000226471 | 15.4503904  | 25.60897935 | -0.7239191   | 0.201188834 | 0.310122037 | Z93930.2    |
| ENSG00000155096 | 2971.142771 | 2418.952359 | 0.296686243  | 0.201192838 | 0.310122037 | AZIN1       |
| ENSG00000237422 | 6.553343093 | 1.813376645 | 1.860480112  | 0.201209357 | 0.310122037 | AL158071.4  |
| ENSG00000218823 | 6.449076083 | 1.722487775 | 1.881681601  | 0.20121347  | 0.310122037 | PAPOLB      |
| ENSG00000162997 | 31.56659873 | 20.36149643 | 0.629943382  | 0.201228918 | 0.310127448 | PRORS1P     |
| ENSG00000110237 | 2747.263717 | 2144.547748 | 0.357225054  | 0.201252359 | 0.310129096 | ARHGEF17    |
| ENSG00000258427 | 5.774411348 | 11.81286086 | -1.034896448 | 0.201253861 | 0.310129096 | RBM8B       |
| ENSG00000235105 | 17.28164982 | 26.4049023  | -0.614372955 | 0.201278229 | 0.310148251 | AL356968.2  |
| ENSG00000225968 | 16.35908941 | 34.49138791 | -1.072283007 | 0.201398929 | 0.310315832 | ELFN1       |
| ENSG00000162522 | 128.8332775 | 197.2180547 | -0.614573642 | 0.201422469 | 0.3103337   | KIAA1522    |
| novel.96        | 3.896553111 | 0.713078025 | 2.446202798  | 0.201477693 | 0.310400376 | -           |
| ENSG00000089289 | 672.3295492 | 862.0875586 | -0.358468968 | 0.201527862 | 0.310459257 | IGBP1       |
| ENSG00000160570 | 392.9151045 | 545.2750678 | -0.472335084 | 0.201586405 | 0.310531032 | DEDD2       |
| ENSG00000121236 | 45.57761007 | 74.48765499 | -0.710637958 | 0.201608194 | 0.310546184 | TRIM6       |
| ENSG00000103381 | 610.8774441 | 757.7665926 | -0.310786159 | 0.201652853 | 0.31059656  | CPPED1      |
| ENSG00000157654 | 0           | 1.773238453 | -3.409972071 | 0.201695747 | 1           | PALM2-AKAP2 |
| ENSG00000206603 | 0           | 1.773238453 | -3.409972071 | 0.201695747 | 1           | SNORA22B    |
| ENSG00000258445 | 0           | 1.773238453 | -3.409972071 | 0.201695747 | 1           | AL132777.1  |
| ENSG00000188263 | 0           | 1.773238453 | -3.409972071 | 0.201695747 | 1           | IL17REL     |
| ENSG00000198826 | 0           | 1.773238453 | -3.409972071 | 0.201695747 | 1           | ARHGAP11A   |
| ENSG00000249942 | 0           | 1.773238453 | -3.409972071 | 0.201695747 | 1           | AC239584.1  |
| ENSG00000249464 | 12.81373007 | 5.54522731  | 1.192872953  | 0.201760708 | 0.310744262 | LINC01091   |
| ENSG00000225684 | 15.04152844 | 6.481377142 | 1.213736204  | 0.201818483 | 0.31081482  | FAM225B     |
| ENSG00000179277 | 124.2574014 | 81.80098368 | 0.603592758  | 0.201844624 | 0.310836653 | MEIS3P1     |
| ENSG00000284862 | 18.01147545 | 9.234499639 | 0.961678588  | 0.201894928 | 0.310895693 | CCDC39      |
| ENSG00000149577 | 835.397299  | 1094.31804  | -0.38944924  | 0.201959926 | 0.31097735  | SIDT2       |
| ENSG00000255093 | 0           | 1.854670712 | -3.466212031 | 0.201979709 | 1           | AP002008.2  |
| ENSG00000207200 | 0           | 1.854670712 | -3.466212031 | 0.201979709 | 1           | RNU6-45P    |
| ENSG00000261780 | 0           | 1.854670712 | -3.466212031 | 0.201979709 | 1           | LINC02582   |
| ENSG00000186940 | 3.676380247 | 8.846123169 | -1.275954816 | 0.201990251 | 0.311005613 | CHCHD2P9    |
| ENSG00000262904 | 0.601596751 | 3.2194636   | -2.416794091 | 0.202022984 | 0.311037579 | TMPOP2      |
| ENSG00000277072 | 150.1347385 | 196.7734993 | -0.39054363  | 0.202045337 | 0.311053562 | STAG3L2     |
| ENSG0000027075  | 245.9833071 | 344.0663657 | -0.484161411 | 0.202071779 | 0.311075837 | PRKCH       |
| ENSG00000273802 | 10.11034127 | 20.46171352 | -1.017181927 | 0.202085182 | 0.311078038 | HIST1H2BG   |
| ENSG00000249264 | 5.439586279 | 10.71140637 | -0.978479039 | 0.202236664 | 0.311292777 | EEF1A1P9    |
| ENSG00000286670 | 3.649911081 | 0.774441189 | 2.289694578  | 0.202355906 | 0.311457868 | AL450467.1  |
| ENSG00000205356 | 863.2084833 | 703.0259508 | 0.296460162  | 0.2024399   | 0.311568689 | TECPR1      |
| ENSG00000134569 | 754.9500283 | 489.5652697 | 0.625343588  | 0.202458478 | 0.311578825 | LRP4        |
| ENSG00000065029 | 734.5400322 | 585.6135026 | 0.327404237  | 0.202545532 | 0.311694335 | ZNF76       |
| ENSG00000181666 | 617.7883219 | 501.0742469 | 0.302431043  | 0.202576185 | 0.311723044 | ZNF875      |
| ENSG00000207205 | 5.121129914 | 0.713078025 | 2.840300209  | 0.202645758 | 0.311811634 | RNVU1-15    |

|                 |             |             |              |             |             |            |
|-----------------|-------------|-------------|--------------|-------------|-------------|------------|
| ENSG00000285925 | 0           | 2.649180997 | -3.981725172 | 0.202652848 | 1           | AC007391.2 |
| ENSG00000226819 | 0           | 2.649180997 | -3.981725172 | 0.202652848 | 1           | MEIS1-AS3  |
| ENSG00000279694 | 0           | 2.649180997 | -3.981725172 | 0.202652848 | 1           | AC011270.2 |
| ENSG00000082458 | 440.8865105 | 324.2528182 | 0.443698476  | 0.202805788 | 0.312039393 | DLG3       |
| ENSG00000230424 | 17.99030562 | 9.539132099 | 0.907195997  | 0.202845758 | 0.312082408 | EMC1-AS1   |
| ENSG00000274717 | 0.601596751 | 4.057708096 | -2.758693916 | 0.203046422 | 0.312372637 | AL049757.1 |
| ENSG00000226005 | 2.081662396 | 0           | 3.39404229   | 0.203048944 | 1           | LINC02660  |
| ENSG00000254932 | 2.081662396 | 0           | 3.39404229   | 0.203048944 | 1           | AP001007.1 |
| ENSG00000234943 | 2.081662396 | 0           | 3.39404229   | 0.203048944 | 1           | AC092839.2 |
| ENSG00000260306 | 2.081662396 | 0           | 3.39404229   | 0.203048944 | 1           | AC092375.2 |
| ENSG00000271064 | 1.541779519 | 7.478890137 | -2.280248781 | 0.203088134 | 0.312418309 | AC027644.2 |
| ENSG00000114626 | 1166.259175 | 845.1980296 | 0.464923028  | 0.203183963 | 0.31254722  | ABTB1      |
| ENSG00000286095 | 0           | 2.587817834 | -3.95008256  | 0.203189853 | 1           | SPEGNB     |
| ENSG00000255965 | 0           | 2.587817834 | -3.95008256  | 0.203189853 | 1           | AC073916.1 |
| ENSG00000236559 | 0           | 2.587817834 | -3.95008256  | 0.203189853 | 1           | AL117381.1 |
| ENSG00000267346 | 0           | 2.587817834 | -3.95008256  | 0.203189853 | 1           | EIF5AP3    |
| ENSG00000103121 | 507.8963167 | 386.8006608 | 0.392839141  | 0.203224263 | 0.312590704 | CMC2       |
| ENSG00000246982 | 22.02518807 | 13.53419276 | 0.699868996  | 0.203281635 | 0.31266044  | Z84485.1   |
| ENSG00000273297 | 10.95098689 | 18.5375073  | -0.763798375 | 0.203348202 | 0.312730309 | AC009275.1 |
| ENSG00000147465 | 3.871337594 | 10.84474518 | -1.479458828 | 0.203351135 | 0.312730309 | STAR       |
| ENSG00000287403 | 0.308355904 | 2.211209725 | -2.757092247 | 0.203398828 | 1           | AC016245.2 |
| ENSG00000248559 | 2.157237677 | 7.784806866 | -1.86005525  | 0.2034165   | 0.312812317 | AC109454.2 |
| ENSG00000160868 | 4.849343637 | 1.161661783 | 2.105688645  | 0.203441122 | 0.312822105 | CYP3A4     |
| ENSG00000277067 | 8.826486624 | 3.862877727 | 1.178334356  | 0.203468081 | 0.312822105 | CU634019.1 |
| ENSG00000267522 | 2.962638588 | 0           | 3.902202942  | 0.203471027 | 0.312822105 | LINC01864  |
| ENSG00000277591 | 2.962638588 | 0           | 3.902202942  | 0.203471027 | 0.312822105 | RN7SL575P  |
| ENSG00000250742 | 242.730647  | 378.0018891 | -0.639099867 | 0.203517939 | 0.312875715 | LINC02381  |
| ENSG00000285943 | 14.46360882 | 7.968896356 | 0.866254565  | 0.203535447 | 0.312884115 | AC112128.1 |
| ENSG00000271869 | 12.59703342 | 5.239438975 | 1.256826316  | 0.203597687 | 0.312961278 | AC026979.2 |
| novel.647       | 69.42721984 | 104.5027563 | -0.590835529 | 0.20362166  | 0.312979609 | -          |
| ENSG00000087245 | 7585.478853 | 16588.90372 | -1.128909293 | 0.203642472 | 0.312993082 | MMP2       |
| ENSG00000224414 | 2.96013129  | 0           | 3.901048486  | 0.203664658 | 0.312999277 | AC010886.1 |
| novel.440       | 101.9549574 | 156.644441  | -0.619284427 | 0.203670597 | 0.312999277 | -          |
| ENSG00000213963 | 62.0016761  | 43.27756058 | 0.522598256  | 0.203689989 | 0.313010564 | AC019080.1 |
| ENSG00000252965 | 7.79561352  | 3.220619475 | 1.276432349  | 0.203878085 | 0.313281082 | RF00019    |
| ENSG00000163352 | 0.293240848 | 2.211209725 | -2.757114249 | 0.203937361 | 1           | LENEP      |
| ENSG00000151651 | 134.9631855 | 81.95742685 | 0.722184337  | 0.204094949 | 0.31359207  | ADAM8      |
| ENSG00000100744 | 268.0787002 | 373.6207422 | -0.479725008 | 0.204104611 | 0.31359207  | GSKIP      |
| ENSG00000044115 | 8232.394202 | 6916.410503 | 0.251263361  | 0.204150493 | 0.313644016 | CTNNA1     |
| novel.931       | 37.36601213 | 55.84248178 | -0.576620668 | 0.204168003 | 0.31365237  | -          |
| ENSG00000187559 | 3.346569772 | 0.336469917 | 3.114073603  | 0.204205166 | 0.313672999 | FOXDL3     |
| ENSG00000134248 | 1298.213535 | 1519.758732 | -0.227304517 | 0.204205577 | 0.313672999 | LAMTOR5    |
| ENSG00000198171 | 941.1287888 | 1185.995644 | -0.333869808 | 0.204376682 | 0.313917268 | DDRKG1     |
| ENSG00000131591 | 289.1871132 | 387.0487976 | -0.419856095 | 0.204473768 | 0.314025298 | C1orf159   |
| ENSG00000135540 | 374.0925168 | 229.2468509 | 0.705628656  | 0.204479929 | 0.314025298 | NHSL1      |
| ENSG00000138764 | 1124.676442 | 792.0520459 | 0.506200513  | 0.204483276 | 0.314025298 | CCNG2      |
| ENSG00000173762 | 88.43775611 | 52.75905392 | 0.743788813  | 0.204560275 | 0.314124978 | CD7        |
| ENSG00000287757 | 8.608892329 | 2.149846562 | 1.999122101  | 0.204579934 | 0.314136599 | AC244636.3 |
| ENSG00000245937 | 469.1771975 | 359.6656463 | 0.382796343  | 0.204606098 | 0.314158208 | LINC01184  |
| novel.55        | 6.539481686 | 2.10970837  | 1.624681149  | 0.204632474 | 0.314180138 | -          |
| ENSG00000258458 | 7.5603256   | 3.159256312 | 1.245400921  | 0.204712756 | 0.314284826 | AL160314.2 |



|                 |             |             |              |             |             |            |
|-----------------|-------------|-------------|--------------|-------------|-------------|------------|
| ENSG00000122687 | 4.290584757 | 10.02785405 | -1.230351731 | 0.20476395  | 0.314344847 | MRM2       |
| ENSG00000245711 | 8.976098803 | 3.32212083  | 1.448781765  | 0.204802754 | 0.31438584  | NADK2-AS1  |
| ENSG00000273308 | 2.402626059 | 6.614844348 | -1.465504817 | 0.204869138 | 0.314460334 | AC024560.3 |
| ENSG00000160799 | 715.9897137 | 587.4410534 | 0.285579849  | 0.204875489 | 0.314460334 | CCDC12     |
| ENSG00000102125 | 731.0506601 | 576.5868048 | 0.342866348  | 0.204940957 | 0.314542238 | TAZ        |
| ENSG00000142252 | 33.39040753 | 49.17218204 | -0.557333167 | 0.205027448 | 0.314656396 | GEMIN7     |
| ENSG00000172661 | 1076.762921 | 892.8182243 | 0.270093994  | 0.205086071 | 0.314686326 | WASHC2C    |
| ENSG00000101193 | 898.5930666 | 1055.561622 | -0.232221096 | 0.205095023 | 0.314686326 | GID8       |
| ENSG00000278200 | 0.616711807 | 3.189937893 | -2.386406164 | 0.205095399 | 0.314686326 | LINC01971  |
| ENSG00000104044 | 0.616711807 | 3.189937893 | -2.386406164 | 0.205095399 | 0.314686326 | OCA2       |
| ENSG00000183475 | 313.3837129 | 252.411005  | 0.313283192  | 0.205129372 | 0.314719866 | ASB7       |
| ENSG00000244257 | 6.492882868 | 1.467450118 | 2.158335383  | 0.205191825 | 0.314797095 | PKD1P1     |
| ENSG00000233122 | 13.9363337  | 7.847325905 | 0.824787786  | 0.205278363 | 0.314889382 | CTAGE7P    |
| ENSG00000109133 | 1029.880842 | 1246.142943 | -0.275230941 | 0.205279987 | 0.314889382 | TMEM33     |
| ENSG00000166199 | 230.1173314 | 287.0111331 | -0.319410323 | 0.205288339 | 0.314889382 | ALKBH3     |
| ENSG00000010626 | 188.4455485 | 146.9317167 | 0.357342755  | 0.2053589   | 0.314979018 | LRRC23     |
| ENSG00000103343 | 166.9100971 | 129.3904381 | 0.366262245  | 0.205543401 | 0.315243394 | ZNF174     |
| ENSG00000164402 | 1020.766978 | 1498.061335 | -0.553454433 | 0.205626154 | 0.315351697 | SEPT8      |
| ENSG00000163399 | 4370.722096 | 6121.954936 | -0.486144327 | 0.205659151 | 0.315383686 | ATP1A1     |
| ENSG00000198843 | 2144.277041 | 1754.951341 | 0.28891514   | 0.205810683 | 0.315597436 | SELENOT    |
| ENSG00000138685 | 2013.210516 | 2687.942033 | -0.41687773  | 0.20584033  | 0.315624269 | FGF2       |
| ENSG00000286561 | 0           | 2.558292127 | -3.934382644 | 0.205895787 | 1           | AC011092.3 |
| ENSG00000264201 | 0           | 2.558292127 | -3.934382644 | 0.205895787 | 1           | MIR4701    |
| ENSG00000160472 | 0           | 2.558292127 | -3.934382644 | 0.205895787 | 1           | TMEM190    |
| ENSG00000227477 | 2.697120555 | 6.796622087 | -1.329159491 | 0.205922107 | 0.315731027 | STK4-AS1   |
| ENSG00000141579 | 2.72484337  | 7.142548615 | -1.392004797 | 0.205972254 | 0.315789279 | ZNF750     |
| ENSG00000196576 | 6654.901225 | 8335.97649  | -0.324920226 | 0.206067173 | 0.315916164 | PLXNB2     |
| ENSG00000164291 | 377.7793817 | 526.9475703 | -0.480672217 | 0.206101729 | 0.315950497 | ARSK       |
| ENSG00000133030 | 6154.62113  | 7878.212486 | -0.356162428 | 0.20612913  | 0.315961488 | MPRIP      |
| ENSG00000064886 | 13.41532682 | 35.87612149 | -1.417409132 | 0.206134841 | 0.315961488 | CHI3L2     |
| ENSG00000115808 | 714.251937  | 578.6838794 | 0.303808107  | 0.206152473 | 0.315961488 | STRN       |
| ENSG00000169814 | 306.2105378 | 373.5809767 | -0.286615471 | 0.206157544 | 0.315961488 | BTD        |
| ENSG00000260648 | 0           | 2.609042805 | -3.960949047 | 0.206204633 | 1           | AC020658.3 |
| ENSG00000169599 | 472.8773981 | 568.9353836 | -0.266875899 | 0.206258486 | 0.316086207 | NFU1       |
| ENSG00000259376 | 7.553986085 | 2.292641984 | 1.748172981  | 0.206263252 | 0.316086207 | AC090907.1 |
| ENSG00000124786 | 618.4581142 | 511.7216401 | 0.273147675  | 0.206276873 | 0.316088437 | SLC35B3    |
| ENSG00000148110 | 1435.121236 | 1756.200457 | -0.291478139 | 0.206456608 | 0.316345196 | MFS14B     |
| ENSG00000160785 | 428.9252773 | 520.3518835 | -0.279107316 | 0.206602776 | 0.316550494 | SLC25A44   |
| ENSG00000019144 | 4227.924263 | 3177.718278 | 0.41191343   | 0.206701083 | 0.316682442 | PHLDB1     |
| ENSG00000188626 | 3.671365652 | 0.356539013 | 3.247316849  | 0.206837693 | 0.316873053 | GOLGA8M    |
| ENSG00000227440 | 1.801029308 | 5.932447905 | -1.721887027 | 0.206853398 | 0.316878428 | ATP5MC1P4  |
| ENSG00000270647 | 0.907445357 | 3.546476906 | -1.969707194 | 0.206906127 | 0.316940515 | TAF15      |
| ENSG00000286518 | 0.293240848 | 2.844011366 | -3.128530859 | 0.206973644 | 0.317025247 | AL354743.1 |
| ENSG00000079999 | 1362.605043 | 1633.419017 | -0.26165492  | 0.206987431 | 0.317027675 | KEAP1      |
| ENSG00000285294 | 11.68492947 | 3.149799701 | 1.883150698  | 0.207025459 | 0.317067228 | LINC00842  |
| ENSG00000146842 | 304.457005  | 382.525356  | -0.330159311 | 0.20750486  | 0.317782715 | TMEM209    |
| ENSG00000224383 | 9.780530799 | 3.465044647 | 1.480937378  | 0.2075209   | 0.317785411 | PRR29      |
| ENSG00000122432 | 23.37451754 | 14.02407059 | 0.73742301   | 0.207531083 | 0.317785411 | SPATA1     |
| ENSG00000263982 | 3.270994492 | 0.387220594 | 3.083733398  | 0.20763699  | 0.317928844 | AC009716.1 |
| ENSG00000146540 | 2232.208995 | 1688.024384 | 0.40295178   | 0.207665971 | 0.317952818 | C7orf50    |
| ENSG00000228532 | 142.7383138 | 191.9535039 | -0.426461    | 0.207677123 | 0.317952818 | AC005000.1 |

|                 |             |             |              |             |             |             |
|-----------------|-------------|-------------|--------------|-------------|-------------|-------------|
| ENSG00000088451 | 257.677811  | 310.3245168 | -0.267739138 | 0.207873173 | 0.318234218 | TGDS        |
| ENSG00000224999 | 2.446717578 | 0.336469917 | 2.660570409  | 0.208027821 | 0.318452204 | VTA1P1      |
| ENSG00000188554 | 2487.772787 | 3136.436238 | -0.334203344 | 0.208104671 | 0.31855037  | NBR1        |
| ENSG00000156587 | 1551.385912 | 2032.138287 | -0.389455487 | 0.208116469 | 0.31855037  | UBE2L6      |
| ENSG00000269053 | 7.380483309 | 1.518200796 | 2.301404277  | 0.208136839 | 0.318562781 | AC010319.3  |
| ENSG00000223722 | 9.185344834 | 1.722487775 | 2.401084038  | 0.208452111 | 0.319026526 | AC023157.1  |
| ENSG00000179029 | 256.6070346 | 327.2191707 | -0.350008886 | 0.208476522 | 0.319045092 | TMEM107     |
| ENSG00000243414 | 0.616711807 | 4.493239223 | -2.869313132 | 0.208666104 | 0.319316413 | TICAM2      |
| ENSG00000265917 | 17.17709808 | 9.141299019 | 0.902114977  | 0.208758147 | 0.319433443 | MIR3685     |
| ENSG00000108509 | 796.65948   | 1008.749678 | -0.340185269 | 0.208769673 | 0.319433443 | CAMTA2      |
| ENSG00000236896 | 0.308355904 | 2.913675265 | -3.160348973 | 0.208779466 | 0.319433443 | AL354726.1  |
| ENSG00000101160 | 4624.591083 | 3503.687089 | 0.400494126  | 0.208923246 | 0.319634605 | CTSZ        |
| ENSG00000002549 | 1662.41978  | 2267.877607 | -0.448128993 | 0.208953524 | 0.319662104 | LAP3        |
| ENSG00000166105 | 4.933694459 | 0           | 4.635815965  | 0.208968285 | 0.319665862 | GLB1L3      |
| ENSG00000111676 | 2614.11713  | 3147.458504 | -0.26785283  | 0.209011566 | 0.319712628 | ATN1        |
| ENSG00000089234 | 412.0343255 | 485.6737907 | -0.237095057 | 0.209023467 | 0.319712628 | BRAP        |
| ENSG00000078668 | 1719.451896 | 2092.260045 | -0.2832722   | 0.209038942 | 0.319717475 | VDAC3       |
| ENSG00000232004 | 28.50958013 | 43.6977745  | -0.613436276 | 0.209059957 | 0.319730795 | CAP1P2      |
| ENSG00000168958 | 1228.436589 | 1470.518954 | -0.259694735 | 0.209101494 | 0.319775496 | MFF         |
| ENSG00000260634 | 3.561728042 | 0.743759607 | 2.288544901  | 0.209225741 | 0.319946673 | AC012508.2  |
| ENSG00000276141 | 92.76670613 | 129.2066869 | -0.476177232 | 0.209245047 | 0.319957364 | WHAMMP3     |
| ENSG00000232775 | 3.082305388 | 0           | 3.956536926  | 0.209308838 | 0.320036072 | BMS1P22     |
| ENSG00000199545 | 5.377872405 | 1.4981317   | 1.870622134  | 0.209362614 | 0.320099457 | RNA5SP195   |
| ENSG00000123870 | 43.74731956 | 30.18390762 | 0.534942714  | 0.209502292 | 0.320280634 | ZNF137P     |
| ENSG00000226210 | 101.607212  | 39.10714352 | 1.376066626  | 0.209505769 | 0.320280634 | WASH8P      |
| ENSG00000199477 | 9.652017186 | 3.72941052  | 1.388971953  | 0.209522303 | 0.320287064 | SNORA31     |
| ENSG00000228317 | 0           | 1.793307549 | -3.424100018 | 0.209543959 | 1           | AL158070.1  |
| ENSG00000259155 | 0           | 1.793307549 | -3.424100018 | 0.209543959 | 1           | AL591767.3  |
| ENSG00000171872 | 0.308355904 | 2.772035718 | -3.096051589 | 0.209588455 | 0.320369338 | KLF17       |
| ENSG00000260197 | 32.45599446 | 7.85922266  | 2.041108529  | 0.209659746 | 0.320459458 | AC010889.1  |
| ENSG00000070413 | 1466.909562 | 1721.674652 | -0.230899963 | 0.209741605 | 0.320565718 | DGCR2       |
| ENSG00000106236 | 207.2847222 | 105.4004374 | 0.97513328   | 0.209760868 | 0.3205763   | NPTX2       |
| ENSG00000230257 | 1.521649867 | 7.591003978 | -2.31516309  | 0.209825497 | 0.320656211 | NFE4        |
| ENSG00000215630 | 9.163534258 | 2.842855491 | 1.687310989  | 0.209876906 | 0.32071591  | GUSBP9      |
| ENSG00000276282 | 3.943151929 | 1.10029862  | 1.856207863  | 0.209897468 | 0.320728466 | AC022960.2  |
| ENSG00000133835 | 1441.2253   | 1710.471231 | -0.247224417 | 0.209928455 | 0.32075695  | HSD17B4     |
| ENSG00000183648 | 840.1121911 | 705.6014051 | 0.251895902  | 0.209953098 | 0.320775739 | NDUFB1      |
| ENSG00000223804 | 148.484575  | 110.2000601 | 0.430264339  | 0.210045914 | 0.320898677 | AC244669.1  |
| ENSG00000223959 | 389.9481953 | 262.4994174 | 0.571153769  | 0.210094747 | 0.320954409 | AFG3L1P     |
| ENSG00000108256 | 1806.353302 | 2109.440961 | -0.223774206 | 0.210275797 | 0.321212105 | NUFIP2      |
| ENSG00000280515 | 5.450940389 | 1.345879667 | 1.983091423  | 0.21030541  | 0.321214014 | SALRNA2     |
| ENSG00000269304 | 0.308355904 | 2.792104814 | -3.105294128 | 0.210325208 | 0.321214014 | FKBP1AP1    |
| ENSG00000077942 | 1840.18665  | 4390.14186  | -1.254447181 | 0.210325705 | 0.321214014 | FBLN1       |
| ENSG00000186766 | 3.068443981 | 0           | 3.950326602  | 0.210338864 | 0.321214014 | FOXI2       |
| ENSG00000188120 | 3.068443981 | 0           | 3.950326602  | 0.210338864 | 0.321214014 | DAZ1        |
| ENSG00000268081 | 2.416487466 | 0.336469917 | 2.645372585  | 0.210555151 | 0.321506517 | AC123912.1  |
| ENSG00000158482 | 2.416487466 | 0.336469917 | 2.645372585  | 0.210555151 | 0.321506517 | SNX29P1     |
| ENSG00000219653 | 0           | 2.50754145  | -3.907452209 | 0.210630655 | 1           | GCNT1P4     |
| ENSG00000149308 | 258.3378589 | 319.5510537 | -0.306934399 | 0.210662097 | 0.321650913 | NPAT        |
| ENSG00000172977 | 296.5772262 | 240.8242168 | 0.300463416  | 0.210775783 | 0.321805583 | KAT5        |
| ENSG00000273305 | 9.933975195 | 4.596024848 | 1.10522352   | 0.210802237 | 0.321827061 | AC009237.15 |

|                 |             |             |              |             |             |            |
|-----------------|-------------|-------------|--------------|-------------|-------------|------------|
| ENSG00000276968 | 2.405133356 | 0.356539013 | 2.639630071  | 0.210854378 | 0.321887749 | AL158196.1 |
| ENSG00000261442 | 0           | 2.557136252 | -3.934119785 | 0.210869201 | 1           | AC023830.1 |
| ENSG00000271779 | 0           | 2.557136252 | -3.934119785 | 0.210869201 | 1           | AC009994.1 |
| ENSG00000287352 | 0           | 2.557136252 | -3.934119785 | 0.210869201 | 1           | AC011029.1 |
| ENSG00000057149 | 0           | 2.557136252 | -3.934119785 | 0.210869201 | 1           | SERPINB3   |
| ENSG00000234043 | 11.84206354 | 6.206270388 | 0.940844991  | 0.210907356 | 0.321949448 | NUDT9P1    |
| ENSG00000285577 | 0.308355904 | 2.129777466 | -2.713328881 | 0.21090869  | 1           | AC019127.1 |
| ENSG00000278472 | 0.308355904 | 3.048298346 | -3.234874827 | 0.210926114 | 0.321949448 | AC009268.2 |
| ENSG00000279765 | 13.31077508 | 7.286499912 | 0.87785609   | 0.21093197  | 0.321949448 | AC013394.1 |
| ENSG00000230583 | 5.790780053 | 1.762625967 | 1.703766038  | 0.210945317 | 0.321950906 | GTF2IRD1P1 |
| ENSG00000103061 | 103.6946288 | 140.9063249 | -0.44390473  | 0.21096108  | 0.321956052 | SLC7A6OS   |
| ENSG00000104804 | 10.23097699 | 5.095359283 | 1.015668436  | 0.210992012 | 0.321984345 | TULP2      |
| ENSG00000226688 | 44.53001225 | 31.03045286 | 0.518434334  | 0.21101756  | 0.322004419 | ENTPD1-AS1 |
| ENSG00000006432 | 19.82288996 | 34.54753245 | -0.805839461 | 0.211102049 | 0.322114427 | MAP3K9     |
| ENSG00000161249 | 23.26885434 | 44.74513909 | -0.944383205 | 0.211119102 | 0.322121528 | DMKN       |
| ENSG00000178150 | 13.4745334  | 5.879257082 | 1.203242253  | 0.21114149  | 0.322123057 | ZNF114     |
| ENSG00000272277 | 24.65550888 | 14.90014152 | 0.723533826  | 0.211176565 | 0.322123057 | AL031963.3 |
| ENSG00000286048 | 1.17296339  | 5.146109961 | -2.114131913 | 0.211178241 | 0.322123057 | AC008966.3 |
| ENSG00000258998 | 3.057161142 | 0           | 3.945264829  | 0.211182096 | 0.322123057 | LINC02302  |
| ENSG00000258342 | 3.057161142 | 0           | 3.945264829  | 0.211182096 | 0.322123057 | AL133304.3 |
| ENSG00000174106 | 561.9499869 | 451.8391604 | 0.314296283  | 0.211337449 | 0.322325149 | LEMD3      |
| ENSG00000101442 | 214.9920654 | 161.372662  | 0.41303481   | 0.211339398 | 0.322325149 | ACTR5      |
| ENSG00000261408 | 29.27841141 | 17.83491337 | 0.72077299   | 0.211377516 | 0.32236436  | TEN1-CDK3  |
| ENSG00000269210 | 16.93826268 | 4.881744087 | 1.787802808  | 0.211441375 | 0.322410739 | AC019171.1 |
| ENSG00000124614 | 24.62814207 | 37.16590347 | -0.596187311 | 0.211442785 | 0.322410739 | RPS10      |
| ENSG00000283378 | 2.403879708 | 7.999706332 | -1.736961567 | 0.211445156 | 0.322410739 | CNTNAP3C   |
| ENSG00000261143 | 4.927426216 | 0.672939833 | 2.837354118  | 0.211462376 | 0.322418075 | ADAMTS7P3  |
| ENSG00000228280 | 2.405133356 | 0.336469917 | 2.639623974  | 0.211517556 | 0.322447892 | AL731568.1 |
| ENSG00000269392 | 2.405133356 | 0.336469917 | 2.639623974  | 0.211517556 | 0.322447892 | AC008655.2 |
| ENSG00000162408 | 463.727128  | 591.803826  | -0.352157921 | 0.211519165 | 0.322447892 | NOL9       |
| ENSG00000120699 | 555.6134987 | 712.1786923 | -0.358559251 | 0.211583468 | 0.322526994 | EXOSC8     |
| ENSG00000255893 | 9.701194572 | 4.616093944 | 1.064667174  | 0.211627408 | 0.322575048 | AP000786.1 |
| ENSG00000254459 | 4.735945081 | 1.060160428 | 2.154575767  | 0.211644217 | 0.322581743 | AP002812.2 |
| ENSG00000273524 | 3.35040199  | 0.387220594 | 3.115641061  | 0.211675215 | 0.322610064 | RF00017    |
| ENSG00000126267 | 1752.765445 | 2114.662974 | -0.270769954 | 0.211708207 | 0.322641419 | COX6B1     |
| ENSG00000132330 | 34.71896661 | 59.16619085 | -0.769346756 | 0.211824221 | 0.322793562 | SCLY       |
| ENSG00000054793 | 619.7426208 | 856.9752586 | -0.467829708 | 0.211832887 | 0.322793562 | ATP9A      |
| ENSG00000151327 | 1291.931579 | 1053.706578 | 0.293732343  | 0.212254294 | 0.323416739 | FAM177A1   |
| ENSG00000177432 | 287.9168467 | 184.8102314 | 0.638473388  | 0.212330418 | 0.323513758 | NAP1L5     |
| ENSG00000253175 | 3.591958154 | 0.713078025 | 2.329086924  | 0.212501902 | 0.32375605  | AC023632.1 |
| ENSG00000182329 | 5.200537412 | 1.456837632 | 1.841668293  | 0.21257616  | 0.323850194 | KIAA2012   |
| ENSG00000164535 | 505.6919657 | 641.7977542 | -0.343360489 | 0.212603077 | 0.323872211 | DAGLB      |
| ENSG00000236679 | 6.627664725 | 2.069570178 | 1.660133823  | 0.212627341 | 0.32387792  | RPL23AP24  |
| ENSG00000169612 | 131.3763133 | 171.0332361 | -0.381853908 | 0.212631757 | 0.32387792  | RAMAC      |
| ENSG00000247092 | 108.8069832 | 139.660534  | -0.361200082 | 0.21265517  | 0.323894593 | SNHG10     |
| ENSG0000024862  | 319.2455797 | 240.1212377 | 0.411025906  | 0.212671802 | 0.323900938 | CCDC28A    |
| ENSG00000039600 | 6.757431987 | 2.089639274 | 1.675930088  | 0.212727208 | 0.32396633  | SOX30      |
| ENSG00000176273 | 104.7399328 | 163.5751854 | -0.644637254 | 0.212760421 | 0.323997919 | SLC35G1    |
| ENSG00000139219 | 3.284855899 | 0.693008929 | 2.220968116  | 0.212914869 | 0.324214114 | COL2A1     |
| ENSG00000279255 | 7.128470678 | 1.456837632 | 2.297543671  | 0.213023999 | 0.32436128  | Z97653.2   |
| ENSG00000003137 | 118.0841573 | 60.05663305 | 0.977374191  | 0.213244945 | 0.324678676 | CYP26B1    |

|                 |             |             |              |             |             |            |
|-----------------|-------------|-------------|--------------|-------------|-------------|------------|
| ENSG00000134265 | 577.7439939 | 706.7918216 | -0.291025231 | 0.213344255 | 0.324810846 | NAPG       |
| ENSG00000113430 | 0.308355904 | 2.751966622 | -3.086621499 | 0.213437101 | 0.324933161 | IRX4       |
| ENSG00000151292 | 731.0254286 | 624.4309454 | 0.227525954  | 0.213480554 | 0.324963323 | CSNK1G3    |
| ENSG00000279144 | 0.307102255 | 2.751966622 | -3.086619893 | 0.213481929 | 0.324963323 | AC099667.1 |
| ENSG00000287728 | 3.672619301 | 0.693008929 | 2.37967844   | 0.21354126  | 0.324965716 | AL360015.1 |
| ENSG00000274443 | 2.770188538 | 0           | 3.802404773  | 0.21354604  | 0.324965716 | C8orf89    |
| ENSG00000216863 | 2.770188538 | 0           | 3.802404773  | 0.21354604  | 0.324965716 | LY86-AS1   |
| ENSG00000234471 | 2.770188538 | 0           | 3.802404773  | 0.21354604  | 0.324965716 | AC147651.3 |
| ENSG00000224137 | 2.770188538 | 0           | 3.802404773  | 0.21354604  | 0.324965716 | LINC01857  |
| novel.310       | 0           | 2.679862578 | -3.997671586 | 0.213581524 | 1           | -          |
| ENSG00000232456 | 0           | 2.679862578 | -3.997671586 | 0.213581524 | 1           | AL355994.2 |
| ENSG00000224629 | 1.847628125 | 5.748230021 | -1.64549252  | 0.213635488 | 0.325082793 | AC004975.1 |
| ENSG00000244471 | 2.76893489  | 0           | 3.801788318  | 0.213654199 | 0.325092225 | AL137058.1 |
| ENSG00000105993 | 2264.422776 | 2794.330599 | -0.303280538 | 0.213697936 | 0.325134359 | DNAJB6     |
| ENSG00000284649 | 4.282991593 | 1.10029862  | 1.972028261  | 0.21372131  | 0.325134359 | AC009093.8 |
| ENSG00000213079 | 700.7866495 | 569.0987145 | 0.30036104   | 0.213722482 | 0.325134359 | SCAF8      |
| ENSG00000236397 | 46.40328317 | 27.58650479 | 0.751748045  | 0.213731947 | 0.325134359 | DDX11L2    |
| ENSG00000241549 | 8.090108017 | 3.280826763 | 1.312323859  | 0.213774715 | 0.325180378 | GUSBP2     |
| ENSG00000201151 | 4.851850935 | 1.4981317   | 1.722637842  | 0.213788271 | 0.32518196  | RF00275    |
| ENSG00000131844 | 596.2778714 | 716.473026  | -0.265062589 | 0.213885509 | 0.325310819 | MCCC2      |
| novel.1072      | 17.6199511  | 8.448290089 | 1.055957681  | 0.214089694 | 0.325602314 | -          |
| ENSG00000157212 | 193.6825134 | 246.3971248 | -0.346326172 | 0.214130201 | 0.325644858 | PAXIP1     |
| ENSG00000252680 | 3.534005227 | 0.387220594 | 3.19585884   | 0.21423562  | 0.325786107 | RNA5SP449  |
| ENSG00000164169 | 158.8901228 | 195.5278367 | -0.300042714 | 0.21428973  | 0.325849319 | PRMT9      |
| ENSG00000116205 | 357.1784142 | 290.4357356 | 0.298240612  | 0.214407534 | 0.326009373 | TCEANC2    |
| ENSG00000038295 | 11.60043611 | 4.097846288 | 1.483242825  | 0.214456848 | 0.326065272 | TLL1       |
| ENSG00000261684 | 2.449224876 | 0.356539013 | 2.661912566  | 0.214556112 | 0.326197106 | AC018362.1 |
| ENSG00000168658 | 6.929752385 | 2.415496705 | 1.500299322  | 0.214578602 | 0.32621221  | VWA3B      |
| ENSG00000095539 | 109.3023042 | 157.9690148 | -0.530158634 | 0.214667982 | 0.326328994 | SEMA4G     |
| ENSG00000227382 | 0           | 1.753169357 | -3.395474556 | 0.214772337 | 1           | EIF4A2P2   |
| ENSG00000259514 | 0           | 1.753169357 | -3.395474556 | 0.214772337 | 1           | AC027243.1 |
| ENSG00000228251 | 7.609431715 | 2.862924587 | 1.407021985  | 0.21477536  | 0.326473124 | AC012442.1 |
| ENSG00000225131 | 7.868681504 | 13.88011929 | -0.821897753 | 0.214801909 | 0.326494377 | PSME2P2    |
| ENSG00000180209 | 6.121844177 | 1.834601616 | 1.748556189  | 0.21487368  | 0.326558365 | MYLPF      |
| novel.547       | 191.006677  | 113.5786294 | 0.748380089  | 0.214876699 | 0.326558365 | -          |
| ENSG00000276408 | 3.983482502 | 1.080229524 | 1.881978538  | 0.214881714 | 0.326558365 | AC025287.2 |
| ENSG00000186564 | 247.4649383 | 103.0740314 | 1.262663721  | 0.214954413 | 0.32664974  | FOXD2      |
| ENSG00000137221 | 848.6311916 | 691.0033616 | 0.296770606  | 0.215059651 | 0.326790548 | TJAP1      |
| ENSG00000285280 | 8.428694033 | 3.668047357 | 1.213387338  | 0.215229954 | 0.327022791 | AL390957.1 |
| ENSG00000033800 | 661.6698365 | 516.7991948 | 0.356317276  | 0.215237663 | 0.327022791 | PIAS1      |
| ENSG00000125149 | 277.6242431 | 343.981817  | -0.308911936 | 0.215257556 | 0.327033891 | C16orf70   |
| ENSG00000222345 | 5.215652468 | 11.6274871  | -1.158686818 | 0.215366292 | 0.327179957 | SNORD19C   |
| ENSG00000168000 | 34.99382965 | 53.52848643 | -0.611839374 | 0.215400673 | 0.327213055 | BSCL2      |
| ENSG00000137880 | 7.278438862 | 2.782648203 | 1.369510029  | 0.215425375 | 0.327230727 | GCHFR      |
| ENSG00000204790 | 3.034452922 | 0.723690511 | 2.07464752   | 0.215437496 | 0.327230727 | AL163540.1 |
| ENSG00000213339 | 1051.384041 | 847.1258225 | 0.311505126  | 0.215480968 | 0.327262831 | QTRT1      |
| ENSG00000287601 | 1.510295757 | 4.799027558 | -1.658427959 | 0.215483824 | 0.327262831 | BX323046.2 |
| ENSG00000149346 | 176.5018678 | 137.3395221 | 0.360147045  | 0.215509601 | 0.327282847 | SLX4IP     |
| ENSG00000155329 | 259.185813  | 199.2424436 | 0.377936055  | 0.215572897 | 0.327359229 | ZCCHC10    |
| ENSG00000126249 | 67.22603284 | 92.12329006 | -0.45682367  | 0.21559339  | 0.327359229 | PDCD2L     |
| ENSG00000228763 | 2.06654734  | 7.193299292 | -1.78969544  | 0.215597697 | 0.327359229 | LIMS1-AS1  |

|                 |             |             |              |             |             |            |
|-----------------|-------------|-------------|--------------|-------------|-------------|------------|
| ENSG00000145423 | 42.54684647 | 223.2367767 | -2.391701608 | 0.215642491 | 0.327408109 | SFRP2      |
| ENSG00000166143 | 3.534005227 | 0.356539013 | 3.195838912  | 0.215663484 | 0.327420848 | PPP1R14D   |
| ENSG00000186868 | 2.435363469 | 0.356539013 | 2.654908313  | 0.215740849 | 0.327519166 | MAPT       |
| ENSG00000116809 | 595.2488655 | 771.7778548 | -0.374227826 | 0.215827779 | 0.327631991 | ZBTB17     |
| ENSG00000269656 | 2.449224876 | 6.573421887 | -1.42488569  | 0.215985175 | 0.327851766 | NOP53-AS1  |
| ENSG00000197603 | 536.8593763 | 423.949821  | 0.340176692  | 0.21601087  | 0.327871614 | CPLANE1    |
| ENSG00000286990 | 14.59810594 | 5.725849174 | 1.350704312  | 0.216091793 | 0.327975281 | AC016026.2 |
| ENSG00000273138 | 2.430348874 | 0.356539013 | 2.652387686  | 0.216169726 | 0.3280744   | AC005021.1 |
| ENSG00000235488 | 0.586481695 | 4.178122672 | -2.820445834 | 0.216218689 | 0.328088361 | JARID2-AS1 |
| ENSG00000115526 | 426.9607748 | 313.4785201 | 0.444830146  | 0.216226849 | 0.328088361 | CHST10     |
| ENSG00000270513 | 2.771442187 | 0           | 3.803038972  | 0.216229437 | 0.328088361 | AC113368.1 |
| ENSG00000217455 | 2.771442187 | 0           | 3.803038972  | 0.216229437 | 0.328088361 | AC073316.1 |
| ENSG00000230262 | 14.17036797 | 7.399898022 | 0.92989353   | 0.216264394 | 0.328122239 | LINC02603  |
| ENSG00000280183 | 0.616711807 | 3.311508345 | -2.43114734  | 0.216307412 | 0.328162847 | AC067852.4 |
| ENSG00000272979 | 15.69320022 | 7.102282028 | 1.157471467  | 0.21631642  | 0.328162847 | AC093388.1 |
| ENSG00000147166 | 17.45522387 | 9.496553762 | 0.886528703  | 0.216336344 | 0.32817391  | ITGB1BP2   |
| ENSG00000286585 | 5.727812531 | 2.129777466 | 1.421075612  | 0.216546133 | 0.32839079  | AC104472.4 |
| ENSG00000267147 | 2.767681241 | 0           | 3.801188088  | 0.216555152 | 0.32839079  | LINC01842  |
| ENSG00000226375 | 2.767681241 | 0           | 3.801188088  | 0.216555152 | 0.32839079  | AL022310.1 |
| ENSG00000116785 | 2.767681241 | 0           | 3.801188088  | 0.216555152 | 0.32839079  | CFHR3      |
| ENSG00000258732 | 2.767681241 | 0           | 3.801188088  | 0.216555152 | 0.32839079  | AC025884.1 |
| ENSG00000105370 | 2.767681241 | 0           | 3.801188088  | 0.216555152 | 0.32839079  | LIM2       |
| ENSG00000252759 | 4.809013064 | 1.406086955 | 1.761859124  | 0.216568627 | 0.328392056 | RF00019    |
| ENSG00000162066 | 298.421236  | 367.7034362 | -0.301177779 | 0.216780265 | 0.328688984 | AMDHD2     |
| ENSG00000229534 | 2.430348874 | 0.336469917 | 2.652390355  | 0.216813625 | 0.328688984 | HNRNPA1P53 |
| ENSG00000251453 | 2.430348874 | 0.336469917 | 2.652390355  | 0.216813625 | 0.328688984 | HAUS1P1    |
| ENSG00000166326 | 2196.887804 | 1851.187781 | 0.246836599  | 0.216815049 | 0.328688984 | TRIM44     |
| ENSG00000239653 | 23.74172401 | 12.77969228 | 0.900041309  | 0.216849097 | 0.328721418 | PSMD6-AS2  |
| ENSG00000184612 | 3.018084217 | 0.693008929 | 2.0942122    | 0.216972298 | 0.32888899  | RPL7P26    |
| ENSG00000213023 | 6.377261748 | 11.89198137 | -0.899117184 | 0.21702112  | 0.328931418 | SYT3       |
| ENSG00000255052 | 15.59491672 | 6.114225644 | 1.35231955   | 0.21702561  | 0.328931418 | FAM66D     |
| ENSG00000236296 | 5.763057239 | 11.05733289 | -0.943308661 | 0.217120377 | 0.329055854 | GUSBP5     |
| ENSG00000205832 | 7.586794766 | 3.260757667 | 1.223034625  | 0.21714218  | 0.329069703 | C16orf96   |
| ENSG00000277496 | 19.31818051 | 5.757558237 | 1.757761876  | 0.217189713 | 0.329122539 | AL357033.4 |
| ENSG00000160953 | 1263.89259  | 1058.016405 | 0.256706893  | 0.217330266 | 0.329316321 | PWWP3A     |
| ENSG00000272693 | 25.02056407 | 15.63444452 | 0.675314501  | 0.217367582 | 0.329353657 | AC073107.1 |
| ENSG00000240143 | 3.368024343 | 0.743759607 | 2.202188788  | 0.217428229 | 0.329426336 | AL023653.1 |
| ENSG00000172340 | 1131.757748 | 1422.251761 | -0.329593741 | 0.217449441 | 0.329439263 | SUCLG2     |
| ENSG00000109775 | 378.1235796 | 489.5780097 | -0.372950071 | 0.217495135 | 0.329489277 | UFSP2      |
| ENSG00000287686 | 13.06169702 | 6.430626464 | 1.019527949  | 0.217526287 | 0.329517256 | AC062029.1 |
| ENSG00000171724 | 785.0596117 | 421.6631433 | 0.897072737  | 0.217603073 | 0.329614356 | VAT1L      |
| ENSG00000214711 | 3.885199001 | 9.170696331 | -1.227858849 | 0.217678158 | 0.329708868 | CAPN14     |
| ENSG00000223177 | 3.576843098 | 0.672939833 | 2.368871233  | 0.217715614 | 0.329739178 | RNA5SP39   |
| ENSG00000282542 | 0           | 2.435565801 | -3.868708862 | 0.217724299 | 1           | AC008993.1 |
| ENSG00000254115 | 0           | 2.435565801 | -3.868708862 | 0.217724299 | 1           | AC090572.3 |
| ENSG00000267677 | 0           | 2.435565801 | -3.868708862 | 0.217724299 | 1           | AC016229.2 |
| ENSG00000177752 | 5.199283763 | 1.456837632 | 1.841266089  | 0.217732474 | 0.329739178 | YIPF7      |
| ENSG00000265630 | 5.476155906 | 1.854670712 | 1.581079005  | 0.217736243 | 0.329739178 | BX547991.2 |
| ENSG00000266835 | 1.526664462 | 5.961845217 | -1.962732727 | 0.217793986 | 0.3298074   | GAPLINC    |
| ENSG00000234789 | 1.524157165 | 4.320918095 | -1.506680561 | 0.217852987 | 0.329854301 | AL590369.1 |
| ENSG00000268322 | 3.255879435 | 0.387220594 | 3.077471746  | 0.217858184 | 0.329854301 | BNIP3P25   |

|                 |             |             |              |             |             |            |
|-----------------|-------------|-------------|--------------|-------------|-------------|------------|
| ENSG00000139540 | 5.980722805 | 2.211209725 | 1.454735204  | 0.217864289 | 0.329854301 | SLC39A5    |
| ENSG00000006740 | 75.13819295 | 48.88659119 | 0.619544329  | 0.217881746 | 0.329854301 | ARHGAP44   |
| ENSG00000122741 | 644.0723971 | 784.2548877 | -0.283768987 | 0.217891913 | 0.329854301 | DCAF10     |
| ENSG00000157800 | 562.1216232 | 712.8980505 | -0.343232708 | 0.217901134 | 0.329854301 | SLC37A3    |
| ENSG00000227467 | 1.817398012 | 0           | 3.195523219  | 0.217972253 | 1           | LINC01537  |
| ENSG00000214203 | 1.817398012 | 0           | 3.195523219  | 0.217972253 | 1           | RPS4XP1    |
| ENSG00000267781 | 1.817398012 | 0           | 3.195523219  | 0.217972253 | 1           | SLC25A36P1 |
| ENSG00000280432 | 1.817398012 | 0           | 3.195523219  | 0.217972253 | 1           | AP000962.2 |
| ENSG00000204965 | 1.817398012 | 0           | 3.195523219  | 0.217972253 | 1           | PCDHA5     |
| ENSG00000123843 | 1.817398012 | 0           | 3.195523219  | 0.217972253 | 1           | C4BPB      |
| ENSG00000261837 | 1.817398012 | 0           | 3.195523219  | 0.217972253 | 1           | AC046158.2 |
| ENSG00000265252 | 1.817398012 | 0           | 3.195523219  | 0.217972253 | 1           | MIR3132    |
| ENSG00000288076 | 1.817398012 | 0           | 3.195523219  | 0.217972253 | 1           | AC018398.1 |
| ENSG00000279400 | 34.55069189 | 59.24218206 | -0.775153978 | 0.218022176 | 0.330016625 | AC008957.3 |
| ENSG00000185252 | 215.9648712 | 162.001996  | 0.413550558  | 0.218033769 | 0.330016625 | ZNF74      |
| ENSG00000267216 | 5.715204773 | 11.31108628 | -0.976431279 | 0.218130723 | 0.33014414  | AC020915.1 |
| novel.1061      | 33.84336101 | 52.46760249 | -0.635207146 | 0.218266006 | 0.330329651 | -          |
| novel.653       | 645.093185  | 502.7318227 | 0.359994816  | 0.21832388  | 0.330397992 | -          |
| ENSG00000283654 | 0.894837599 | 4.474454397 | -2.321583634 | 0.218353538 | 0.330410338 | LMLN2      |
| ENSG00000259374 | 2.714742909 | 0           | 3.774825594  | 0.218382908 | 0.330410338 | NDUFB4P11  |
| ENSG00000286196 | 2.714742909 | 0           | 3.774825594  | 0.218382908 | 0.330410338 | AL162586.2 |
| ENSG00000269699 | 2.714742909 | 0           | 3.774825594  | 0.218382908 | 0.330410338 | ZIM2       |
| ENSG00000132763 | 132.7660446 | 184.3460265 | -0.475141618 | 0.218468344 | 0.330520354 | MMACHC     |
| ENSG00000131871 | 1248.952292 | 1526.380186 | -0.289577404 | 0.218592531 | 0.330688981 | SELENOS    |
| novel.477       | 106.3077267 | 54.67068705 | 0.957368725  | 0.218657566 | 0.330768105 | -          |
| ENSG00000213569 | 3.885199001 | 8.611154608 | -1.141961357 | 0.218684378 | 0.330789405 | AL390039.1 |
| ENSG00000131174 | 1047.781595 | 1279.775457 | -0.288557714 | 0.218754792 | 0.330876651 | COX7B      |
| ENSG00000212123 | 43.00807765 | 24.72743301 | 0.793053157  | 0.218813847 | 0.330946708 | PRR22      |
| ENSG00000147174 | 92.78905835 | 59.49953147 | 0.644999588  | 0.218828578 | 0.330949723 | GCNA       |
| ENSG00000201944 | 3.253372138 | 0.356539013 | 3.076439736  | 0.218864489 | 0.330984767 | RF00139    |
| ENSG00000138944 | 24.30857425 | 63.46040856 | -1.386424563 | 0.219023662 | 0.331206202 | SHISAL1    |
| ENSG00000258130 | 9.430590673 | 3.067083173 | 1.643763987  | 0.219055104 | 0.331224162 | AC106782.1 |
| ENSG00000105219 | 13.65319331 | 7.510855988 | 0.859717898  | 0.219061036 | 0.331224162 | CNTD2      |
| ENSG00000132823 | 589.4374417 | 494.081429  | 0.254915582  | 0.219165491 | 0.331362815 | OSER1      |
| ENSG00000187010 | 23.9511835  | 8.24271884  | 1.5449718    | 0.21933398  | 0.331598262 | RHD        |
| ENSG00000241697 | 2.755073482 | 7.428139459 | -1.42765827  | 0.219392959 | 0.331668129 | TMEFF1     |
| ENSG00000244040 | 3.253372138 | 0.336469917 | 3.076432111  | 0.219418197 | 0.331686983 | IL12A-AS1  |
| ENSG00000111335 | 842.7625075 | 1304.505934 | -0.630334505 | 0.219434792 | 0.33169277  | OAS2       |
| ENSG00000164187 | 370.6494005 | 296.3366028 | 0.322311398  | 0.219506876 | 0.331782428 | LMBRD2     |
| ENSG00000171101 | 4.909803862 | 1.00940975  | 2.245821651  | 0.219647008 | 0.33195957  | SIGLEC17P  |
| ENSG00000132204 | 0           | 2.415496705 | -3.857594473 | 0.219724527 | 1           | LINC00470  |
| ENSG00000216867 | 0           | 2.415496705 | -3.857594473 | 0.219724527 | 1           | RPL22P12   |
| ENSG00000123965 | 0           | 2.415496705 | -3.857594473 | 0.219724527 | 1           | PMS2P5     |
| ENSG00000246451 | 94.01815155 | 134.2990922 | -0.513052738 | 0.219727774 | 0.33195957  | AL049840.1 |
| ENSG00000273100 | 2.699627853 | 0           | 3.767222934  | 0.219741976 | 0.33195957  | AL596442.2 |
| novel.1008      | 2.699627853 | 0           | 3.767222934  | 0.219741976 | 0.33195957  | -          |
| ENSG00000232354 | 2.699627853 | 0           | 3.767222934  | 0.219741976 | 0.33195957  | VIPR1-AS1  |
| ENSG00000279619 | 2.699627853 | 0           | 3.767222934  | 0.219741976 | 0.33195957  | AC020907.5 |
| ENSG00000279377 | 2.699627853 | 0           | 3.767222934  | 0.219741976 | 0.33195957  | AC003973.2 |
| ENSG00000065243 | 1393.441251 | 1120.581674 | 0.314523405  | 0.219754387 | 0.33195957  | PKN2       |
| ENSG00000104805 | 4492.738802 | 5831.169506 | -0.376144727 | 0.219759571 | 0.33195957  | NUCB1      |

|                 |             |             |              |             |             |            |
|-----------------|-------------|-------------|--------------|-------------|-------------|------------|
| ENSG00000249738 | 2.946269883 | 0           | 3.894485751  | 0.219764621 | 0.33195957  | AC008691.1 |
| ENSG00000202318 | 2.946269883 | 0           | 3.894485751  | 0.219764621 | 0.33195957  | RF00019    |
| ENSG00000200091 | 2.388764651 | 0.356539013 | 2.631212831  | 0.219793208 | 0.331964151 | RN7SKP163  |
| ENSG00000280116 | 2.388764651 | 0.356539013 | 2.631212831  | 0.219793208 | 0.331964151 | AC231657.2 |
| novel.827       | 3.915429114 | 8.620611218 | -1.136000821 | 0.219832207 | 0.332003753 | -          |
| ENSG00000285851 | 12.37943912 | 4.880459818 | 1.358157623  | 0.219857425 | 0.332022539 | AL359762.3 |
| ENSG00000151773 | 44.26406694 | 71.34602763 | -0.688124936 | 0.219962328 | 0.332161561 | CCDC122    |
| ENSG00000214653 | 5.774411348 | 10.83297682 | -0.907252917 | 0.219975052 | 0.332161561 | HNRNPA3P3  |
| ENSG00000197140 | 9.657103052 | 4.616093944 | 1.059552753  | 0.220004466 | 0.33218667  | ADAM32     |
| ENSG00000119782 | 105.2336876 | 73.51611887 | 0.515401824  | 0.220062141 | 0.332243013 | FKBP1B     |
| ENSG00000272944 | 0.601596751 | 3.424906455 | -2.514282374 | 0.220067357 | 0.332243013 | AC079834.2 |
| ENSG00000065060 | 452.3928072 | 324.7415867 | 0.477509336  | 0.220186495 | 0.332397366 | UHRF1BP1   |
| ENSG00000285769 | 2.694613258 | 0           | 3.764698926  | 0.220195184 | 0.332397366 | AP003100.2 |
| ENSG00000207291 | 4.763667895 | 1.00940975  | 2.205406461  | 0.22030254  | 0.332540105 | RNU6-30P   |
| ENSG00000147133 | 822.8100831 | 701.8892721 | 0.229296581  | 0.220452181 | 0.332718194 | TAF1       |
| ENSG00000166503 | 1159.49268  | 1430.576297 | -0.303330674 | 0.220453896 | 0.332718194 | HDGFL3     |
| ENSG00000168916 | 365.7002788 | 268.3143445 | 0.447594828  | 0.22045894  | 0.332718194 | ZNF608     |
| ENSG00000267426 | 0.89358395  | 4.177994278 | -2.205537229 | 0.220484256 | 0.332737074 | AC087289.4 |
| ENSG00000229750 | 0           | 2.456790772 | -3.879998859 | 0.2205057   | 1           | AC096649.1 |
| ENSG00000203877 | 2.722336072 | 0           | 3.778638913  | 0.220546527 | 0.332780391 | RIPPLY2    |
| ENSG00000228622 | 2.722336072 | 0           | 3.778638913  | 0.220546527 | 0.332780391 | Z82198.1   |
| ENSG00000183134 | 3.359177531 | 8.306522148 | -1.308113433 | 0.22055446  | 0.332780391 | PTGDR2     |
| ENSG00000100664 | 3884.084646 | 3162.256121 | 0.296505352  | 0.220564194 | 0.332780391 | EIF5       |
| ENSG00000199015 | 0           | 2.455634897 | -3.879685679 | 0.22059441  | 1           | MIR377     |
| ENSG00000198975 | 0           | 2.455634897 | -3.879685679 | 0.22059441  | 1           | MIRLET7A2  |
| ENSG00000249345 | 0.61420451  | 3.280826763 | -2.422999416 | 0.220643453 | 0.332880643 | LINC02405  |
| ENSG00000278231 | 3.926783224 | 1.130980201 | 1.831097374  | 0.220685055 | 0.332924074 | AL133342.1 |
| ENSG00000068383 | 556.2575494 | 442.1843315 | 0.33089913   | 0.220823151 | 0.333106209 | INPP5A     |
| ENSG00000104164 | 1421.59942  | 1202.325709 | 0.241898509  | 0.220840883 | 0.333106209 | BLOC1S6    |
| ENSG00000172530 | 294.8277673 | 363.5037034 | -0.302074639 | 0.220855926 | 0.333106209 | BANP       |
| ENSG00000123080 | 825.1555836 | 587.9197021 | 0.488610837  | 0.220857071 | 0.333106209 | CDKN2C     |
| ENSG00000239112 | 3.546612985 | 10.73019119 | -1.586374435 | 0.220918141 | 0.333178976 | SNORD123   |
| ENSG00000187713 | 672.762986  | 815.7973213 | -0.27833345  | 0.221040301 | 0.333343863 | TMEM203    |
| ENSG00000167397 | 293.2797191 | 409.4224829 | -0.480765349 | 0.221080202 | 0.333384685 | VKORC1     |
| ENSG00000197550 | 3.077290793 | 0.356539013 | 2.991634082  | 0.221241089 | 0.333607935 | AL359955.1 |
| ENSG00000124226 | 1367.184138 | 1149.943871 | 0.249720924  | 0.221286988 | 0.333657782 | RNF114     |
| ENSG00000141971 | 655.1205832 | 798.7658956 | -0.285853081 | 0.221390866 | 0.333795038 | MVB12A     |
| ENSG00000138796 | 979.5587844 | 751.3735486 | 0.382570194  | 0.221465022 | 0.333887468 | HADH       |
| ENSG00000011465 | 31288.5467  | 13876.60302 | 1.172974581  | 0.221489017 | 0.333904268 | DCN        |
| ENSG00000214309 | 52.2428846  | 72.90796264 | -0.482354411 | 0.221509323 | 0.333915505 | MBLAC1     |
| ENSG00000128989 | 2961.162846 | 2484.012516 | 0.253531955  | 0.221594547 | 0.334024595 | ARPP19     |
| ENSG00000267742 | 0.909952655 | 3.698728939 | -2.016517866 | 0.221738529 | 0.334216923 | SIN3CAFP2  |
| ENSG00000261105 | 15.94994271 | 29.2916204  | -0.879983087 | 0.221747867 | 0.334216923 | LMO7-AS1   |
| ENSG00000272431 | 4.274216052 | 1.060160428 | 2.000539357  | 0.221778321 | 0.334243435 | AC104117.5 |
| ENSG00000228862 | 3.077290793 | 0.336469917 | 2.99164063   | 0.221860702 | 0.33434475  | AC068389.1 |
| ENSG00000088970 | 328.8069507 | 238.0357424 | 0.467057454  | 0.221871284 | 0.33434475  | KIZ        |
| ENSG00000232344 | 6.20089567  | 1.773238453 | 1.804071379  | 0.221918204 | 0.33439606  | AC087163.2 |
| ENSG00000285730 | 1.495180701 | 4.63616304  | -1.627597756 | 0.221949345 | 0.334423589 | Z94721.3   |
| ENSG00000159335 | 4690.263417 | 3934.459036 | 0.253456985  | 0.22205521  | 0.334563698 | PTMS       |
| ENSG00000257576 | 16.05958032 | 7.593572517 | 1.066789546  | 0.222090362 | 0.334597257 | HSPD1P4    |
| ENSG00000228624 | 17.3622397  | 27.98446626 | -0.6906716   | 0.222207743 | 0.334754689 | HDAC2-AS2  |

|                 |             |             |              |             |             |            |
|-----------------|-------------|-------------|--------------|-------------|-------------|------------|
| ENSG00000276087 | 3.341555177 | 0.713078025 | 2.221721822  | 0.222497781 | 0.335167739 | AC008073.3 |
| ENSG00000164919 | 1958.997721 | 1609.925337 | 0.283137678  | 0.222515572 | 0.335167739 | COX6C      |
| ENSG00000261167 | 51.79444716 | 34.69965609 | 0.576875791  | 0.222520624 | 0.335167739 | AC107027.3 |
| ENSG00000006016 | 697.4476552 | 2403.375165 | -1.784935074 | 0.22262053  | 0.335298783 | CRLF1      |
| ENSG00000253854 | 27.7768912  | 16.63910238 | 0.74217806   | 0.222677981 | 0.335323359 | AC010834.3 |
| ENSG00000114779 | 824.9715785 | 1049.928716 | -0.347865847 | 0.222708411 | 0.335323359 | ABHD14B    |
| ENSG00000212348 | 2.772695836 | 0           | 3.803697765  | 0.222714286 | 0.335323359 | RNU6-1300P |
| ENSG00000183625 | 2.772695836 | 0           | 3.803697765  | 0.222714286 | 0.335323359 | CCR3       |
| ENSG00000249509 | 2.772695836 | 0           | 3.803697765  | 0.222714286 | 0.335323359 | AC023886.1 |
| ENSG00000259123 | 2.772695836 | 0           | 3.803697765  | 0.222714286 | 0.335323359 | AC103996.3 |
| ENSG00000255045 | 0.586481695 | 3.139187216 | -2.406038914 | 0.222749124 | 0.335352224 | AP000866.5 |
| ENSG00000125611 | 289.8794556 | 373.6007546 | -0.366653431 | 0.222759273 | 0.335352224 | CHCHD5     |
| ENSG00000142544 | 181.2342654 | 233.7908752 | -0.368686515 | 0.222778919 | 0.335362367 | CTU1       |
| ENSG00000273973 | 3.940644631 | 1.130980201 | 1.834853211  | 0.222891591 | 0.335493101 | AC025162.2 |
| ENSG00000230149 | 3.940644631 | 1.130980201 | 1.834853211  | 0.222891591 | 0.335493101 | AL021707.3 |
| ENSG00000025770 | 814.4731511 | 1084.056527 | -0.412461112 | 0.222908869 | 0.335499671 | NCAPH2     |
| ENSG00000258603 | 3.973382041 | 1.060160428 | 1.893700606  | 0.22296879  | 0.335570418 | AC005225.2 |
| ENSG00000239480 | 1.509042109 | 4.402350354 | -1.53442503  | 0.223338698 | 0.336107664 | AC073517.1 |
| ENSG00000285897 | 5.661012792 | 1.803920035 | 1.656380144  | 0.223379536 | 0.336149651 | AC004687.2 |
| ENSG00000287205 | 3.675126598 | 0.672939833 | 2.405209036  | 0.223498208 | 0.336308754 | AL451054.4 |
| ENSG00000226245 | 18.13622812 | 8.487144012 | 1.103624293  | 0.223616984 | 0.336467994 | ZNF32-AS1  |
| ENSG00000130544 | 147.6203945 | 111.5709703 | 0.402805251  | 0.223683001 | 0.336533259 | ZNF557     |
| ENSG00000260083 | 19.58724603 | 11.86245566 | 0.725641206  | 0.223686265 | 0.336533259 | MIR762HG   |
| ENSG00000176046 | 900.9994322 | 499.8808202 | 0.849663263  | 0.223703264 | 0.336539346 | NUPR1      |
| ENSG00000128915 | 833.8783449 | 687.070306  | 0.2795325    | 0.223844087 | 0.336731702 | ICE2       |
| ENSG00000285793 | 22.11559367 | 11.14706589 | 0.990364811  | 0.223919103 | 0.336825047 | AC125232.2 |
| ENSG00000148156 | 2.684512796 | 0           | 3.759565485  | 0.22396309  | 0.336832709 | ACTL7B     |
| ENSG00000280247 | 2.684512796 | 0           | 3.759565485  | 0.22396309  | 0.336832709 | AC005578.1 |
| ENSG00000261765 | 2.684512796 | 0           | 3.759565485  | 0.22396309  | 0.336832709 | AC009127.1 |
| ENSG00000286781 | 7.51623408  | 3.169868797 | 1.23681442   | 0.224028665 | 0.336911828 | AC099332.1 |
| ENSG00000237301 | 0.601596751 | 2.782648203 | -2.214477155 | 0.224117498 | 0.337025914 | AL121992.1 |
| ENSG00000113231 | 117.8702248 | 89.93788163 | 0.38879194   | 0.224181403 | 0.337086383 | PDE8B      |
| ENSG00000168214 | 1464.713074 | 1914.392994 | -0.386133339 | 0.224183658 | 0.337086383 | RBPJ       |
| ENSG00000006530 | 133.2619506 | 178.4755369 | -0.421100967 | 0.224277214 | 0.33720754  | AGK        |
| ENSG00000270171 | 2.68075185  | 0           | 3.757661835  | 0.224306736 | 1           | AL359881.3 |
| ENSG00000213033 | 2.68075185  | 0           | 3.757661835  | 0.224306736 | 1           | AURKAP1    |
| ENSG00000254664 | 2.68075185  | 0           | 3.757661835  | 0.224306736 | 1           | AC103681.2 |
| ENSG00000249736 | 2.68075185  | 0           | 3.757661835  | 0.224306736 | 1           | LINC02242  |
| ENSG00000266173 | 183.3380387 | 133.5261108 | 0.457309049  | 0.22436169  | 0.337315032 | STRADA     |
| ENSG00000252835 | 0.308355904 | 2.149846562 | -2.724347074 | 0.224550738 | 1           | SCARNA21   |
| ENSG00000286104 | 3.60707321  | 1.080229524 | 1.744375401  | 0.224616149 | 0.337678057 | AC016629.3 |
| ENSG00000198758 | 4.625338556 | 0           | 4.542688005  | 0.224685361 | 0.337762562 | EPS8L3     |
| ENSG00000117601 | 5.802134163 | 2.191140629 | 1.413681101  | 0.224714053 | 0.337785863 | SERPINC1   |
| ENSG00000167566 | 893.3098898 | 1111.32134  | -0.314849379 | 0.224726864 | 0.337785863 | NCKAP5L    |
| ENSG00000137413 | 430.1176156 | 518.4639158 | -0.269093305 | 0.224812662 | 0.337889694 | TAF8       |
| ENSG00000138760 | 6535.030515 | 5639.933904 | 0.212519922  | 0.224821952 | 0.337889694 | SCARB2     |
| ENSG00000164209 | 1118.917089 | 961.285625  | 0.218861611  | 0.2248903   | 0.337972865 | SLC25A46   |
| ENSG00000118482 | 1321.451876 | 1023.918492 | 0.368310349  | 0.224922903 | 0.338002311 | PHF3       |
| ENSG00000275491 | 0.293240848 | 2.149846562 | -2.724345014 | 0.225110287 | 1           | LINC01730  |
| ENSG00000207744 | 0.293240848 | 2.149846562 | -2.724345014 | 0.225110287 | 1           | MIR10B     |
| ENSG00000257103 | 149.0550009 | 108.8306437 | 0.4531735    | 0.225118428 | 0.338276569 | LSM14A     |



|                 |             |             |              |             |             |             |
|-----------------|-------------|-------------|--------------|-------------|-------------|-------------|
| ENSG0000001461  | 904.6386955 | 716.5760427 | 0.3366119    | 0.225185384 | 0.338357612 | NIPAL3      |
| ENSG00000230551 | 323.8802952 | 218.6415909 | 0.567663281  | 0.225217141 | 0.338385759 | AC021078.1  |
| ENSG00000266824 | 3.007983756 | 0.387220594 | 2.961539497  | 0.225343159 | 0.338519519 | AC129492.5  |
| ENSG00000249771 | 3.007983756 | 0.387220594 | 2.961539497  | 0.225343159 | 0.338519519 | AC108210.1  |
| ENSG00000237232 | 3.04831433  | 6.899279318 | -1.177864583 | 0.225345255 | 0.338519519 | ZNF295-AS1  |
| ENSG00000102390 | 374.9418521 | 489.020103  | -0.383806026 | 0.225512603 | 0.338746342 | PBDC1       |
| ENSG00000214176 | 350.4221802 | 263.861419  | 0.41012603   | 0.225522323 | 0.338746342 | PLEKHM1P1   |
| ENSG00000213901 | 3.047060681 | 8.164882601 | -1.426593041 | 0.22560023  | 0.338843772 | SLC23A3     |
| ENSG00000257512 | 3.676380247 | 0.713078025 | 2.358762034  | 0.225736577 | 0.339028961 | AC124947.2  |
| ENSG00000275763 | 9.795645855 | 22.04842234 | -1.170089875 | 0.225755138 | 0.339030984 | C18orf65    |
| ENSG00000259107 | 5.85876217  | 0.693008929 | 3.06334455   | 0.225764022 | 0.339030984 | LINC00911   |
| ENSG00000276029 | 3.001715513 | 0.387220594 | 2.958804477  | 0.225806696 | 0.339069877 | MIR4477A    |
| ENSG00000272630 | 19.46410302 | 11.71966024 | 0.725524251  | 0.225816023 | 0.339069877 | AL731563.3  |
| ENSG00000241129 | 2.73619748  | 0           | 3.785577657  | 0.225934534 | 0.339208618 | RPL22P19    |
| ENSG00000287468 | 2.73619748  | 0           | 3.785577657  | 0.225934534 | 0.339208618 | AC007317.2  |
| ENSG00000274816 | 27.34106187 | 11.00645382 | 1.317432305  | 0.225954614 | 0.339219163 | MIR6772     |
| ENSG00000063587 | 394.813179  | 491.1707415 | -0.314790987 | 0.226117352 | 0.339443862 | ZNF275      |
| ENSG00000237887 | 3.340301529 | 0.713078025 | 2.221339181  | 0.226294543 | 0.339690232 | RPL23AP32   |
| ENSG00000113971 | 338.5010648 | 255.3959324 | 0.406657567  | 0.22635264  | 0.33975781  | NPHP3       |
| ENSG00000159128 | 175.3463133 | 218.929412  | -0.320789842 | 0.226387728 | 0.339790847 | IFNGR2      |
| ENSG00000204954 | 145.9281051 | 182.8020588 | -0.324950257 | 0.226476317 | 0.339904176 | C12orf73    |
| ENSG00000135837 | 1084.170559 | 835.1993491 | 0.376718922  | 0.226530284 | 0.339965534 | CEP350      |
| ENSG00000220920 | 0           | 2.395427609 | -3.846282688 | 0.226699308 | 1           | AL023807.1  |
| ENSG00000287673 | 0           | 2.395427609 | -3.846282688 | 0.226699308 | 1           | AC051635.1  |
| ENSG00000276704 | 3.005476459 | 0.723690511 | 2.063398727  | 0.226743627 | 0.340263272 | AL442067.2  |
| ENSG00000215492 | 43.3419338  | 59.98894257 | -0.471848329 | 0.226754871 | 0.340263272 | HNRNPA1P7   |
| ENSG00000226287 | 29.98824958 | 15.61450382 | 0.933816756  | 0.22679315  | 0.340301058 | TMEM191A    |
| ENSG00000269980 | 3.900314058 | 1.060160428 | 1.871395294  | 0.22700197  | 0.340594721 | AC068768.1  |
| ENSG00000135297 | 520.3174388 | 424.0047759 | 0.294782129  | 0.227158171 | 0.340809403 | MTO1        |
| ENSG00000258727 | 15.20625567 | 8.264072205 | 0.878942621  | 0.227189554 | 0.340830288 | AL135999.1  |
| ENSG00000214872 | 14.80219483 | 7.458821041 | 1.004145315  | 0.227198328 | 0.340830288 | SMTNL1      |
| ENSG00000273069 | 1.832513069 | 0           | 3.206129555  | 0.227343963 | 1           | AC211433.2  |
| novel.138       | 1.832513069 | 0           | 3.206129555  | 0.227343963 | 1           | -           |
| ENSG00000175800 | 1.832513069 | 0           | 3.206129555  | 0.227343963 | 1           | OR52B3P     |
| ENSG00000254561 | 1.832513069 | 0           | 3.206129555  | 0.227343963 | 1           | AP003393.1  |
| ENSG00000280312 | 1.832513069 | 0           | 3.206129555  | 0.227343963 | 1           | Z83836.1    |
| ENSG00000240499 | 1.832513069 | 0           | 3.206129555  | 0.227343963 | 1           | AC004594.1  |
| ENSG00000267314 | 1.832513069 | 0           | 3.206129555  | 0.227343963 | 1           | AC104532.1  |
| ENSG00000267690 | 1.832513069 | 0           | 3.206129555  | 0.227343963 | 1           | LDLRAD4-AS1 |
| ENSG00000239268 | 1.832513069 | 0           | 3.206129555  | 0.227343963 | 1           | AC092691.1  |
| ENSG00000182348 | 1.832513069 | 0           | 3.206129555  | 0.227343963 | 1           | ZNF804B     |
| ENSG00000274134 | 1.832513069 | 0           | 3.206129555  | 0.227343963 | 1           | MIR6774     |
| ENSG00000268658 | 5.725305234 | 1.854670712 | 1.645344067  | 0.227349778 | 0.341037793 | LINC00664   |
| ENSG00000235776 | 29.57784923 | 44.73799423 | -0.595137432 | 0.227428873 | 0.341136745 | AC000089.1  |
| novel.775       | 5.214398819 | 1.447381022 | 1.851791674  | 0.227476506 | 0.341188495 | -           |
| ENSG00000149534 | 1.83125942  | 0           | 3.205257266  | 0.227509223 | 1           | MS4A2       |
| ENSG00000198643 | 1.83125942  | 0           | 3.205257266  | 0.227509223 | 1           | FAM3D       |
| ENSG00000236528 | 1.83125942  | 0           | 3.205257266  | 0.227509223 | 1           | AL033528.2  |
| ENSG00000236434 | 1.83125942  | 0           | 3.205257266  | 0.227509223 | 1           | AL162430.2  |
| ENSG00000109158 | 1.83125942  | 0           | 3.205257266  | 0.227509223 | 1           | GABRA4      |
| ENSG00000212413 | 1.83125942  | 0           | 3.205257266  | 0.227509223 | 1           | RNU11-3P    |

|                 |             |             |              |             |             |            |
|-----------------|-------------|-------------|--------------|-------------|-------------|------------|
| ENSG00000267723 | 1.83125942  | 0           | 3.205257266  | 0.227509223 | 1           | AC011509.2 |
| ENSG00000225043 | 0           | 2.52645467  | -3.917944744 | 0.227592703 | 1           | RPL18AP2   |
| ENSG00000229314 | 0           | 2.52645467  | -3.917944744 | 0.227592703 | 1           | ORM1       |
| ENSG00000164659 | 63.53865448 | 45.8005948  | 0.470634473  | 0.227606404 | 0.34136362  | KIAA1324L  |
| ENSG00000269148 | 3.620934617 | 8.111691778 | -1.153195902 | 0.227741873 | 0.34154708  | AC092301.1 |
| ENSG00000263847 | 6.231125782 | 14.61211054 | -1.22543072  | 0.227766215 | 0.341561974 | AP005899.1 |
| ENSG00000164951 | 1069.98012  | 1691.104543 | -0.660226039 | 0.227778098 | 0.341561974 | PDP1       |
| ENSG00000100580 | 450.6401285 | 559.8064349 | -0.312694333 | 0.227893566 | 0.3417154   | TMED8      |
| ENSG00000136819 | 1066.514662 | 883.5871583 | 0.271162225  | 0.22801005  | 0.341870331 | C9orf78    |
| ENSG00000167491 | 1555.152519 | 1830.675399 | -0.235270378 | 0.228037451 | 0.341885148 | GATAD2A    |
| ENSG00000066135 | 380.1203648 | 456.497833  | -0.263805222 | 0.22804625  | 0.341885148 | KDM4A      |
| ENSG00000286786 | 9.118473823 | 4.391737868 | 1.063717628  | 0.228076848 | 0.341911291 | AC116158.3 |
| novel.241       | 5.134991321 | 1.447381022 | 1.832422397  | 0.228113422 | 0.341934226 | -          |
| ENSG00000162959 | 101.6929437 | 73.02824882 | 0.477836492  | 0.228127597 | 0.341934226 | MEMO1      |
| ENSG00000183530 | 564.0456414 | 727.5876333 | -0.367055335 | 0.22813163  | 0.341934226 | PRR14L     |
| ENSG00000161999 | 354.427999  | 447.1333806 | -0.335625546 | 0.228166795 | 0.341967205 | JMJD8      |
| ENSG00000102804 | 3091.105659 | 2405.525619 | 0.361866917  | 0.228205694 | 0.342005777 | TSC22D1    |
| ENSG00000218890 | 1.229662669 | 4.280779903 | -1.809658642 | 0.228489135 | 0.342397127 | NUFIP1P1   |
| ENSG00000185664 | 9.356269041 | 17.14318871 | -0.873644537 | 0.228493183 | 0.342397127 | PMEL       |
| ENSG00000023171 | 701.105359  | 961.5015138 | -0.455480236 | 0.228566253 | 0.342470346 | GRAMD1B    |
| ENSG00000228485 | 0.586481695 | 3.199394504 | -2.430002635 | 0.228568407 | 0.342470346 | GRK5-IT1   |
| ENSG00000232124 | 3.344062475 | 0.672939833 | 2.266605648  | 0.228794736 | 0.342789691 | AP001057.1 |
| ENSG00000279199 | 9.372709017 | 4.290236513 | 1.125650617  | 0.228813901 | 0.342798638 | AC068669.1 |
| ENSG00000151023 | 3.646150135 | 8.457618305 | -1.208777236 | 0.228851022 | 0.34283448  | ENKUR      |
| ENSG00000149735 | 5.542884374 | 1.41669944  | 1.959165365  | 0.228888105 | 0.342870264 | GPHA2      |
| ENSG00000182372 | 3.031945625 | 0.743759607 | 2.054726607  | 0.229031631 | 0.343060056 | CLN8       |
| ENSG00000143919 | 99.66246746 | 77.52521246 | 0.360919582  | 0.229041212 | 0.343060056 | CAMKMT     |
| ENSG00000227678 | 3.902821355 | 0.743759607 | 2.413885811  | 0.229153367 | 0.343208256 | AL355581.1 |
| ENSG00000226490 | 1.818651661 | 0           | 3.196404306  | 0.229186833 | 1           | AC138647.1 |
| ENSG00000225873 | 1.818651661 | 0           | 3.196404306  | 0.229186833 | 1           | C3orf86    |
| ENSG00000231024 | 1.818651661 | 0           | 3.196404306  | 0.229186833 | 1           | AC092431.1 |
| ENSG00000259935 | 1.818651661 | 0           | 3.196404306  | 0.229186833 | 1           | AC009754.1 |
| ENSG00000241622 | 1.818651661 | 0           | 3.196404306  | 0.229186833 | 1           | RARRES2P1  |
| ENSG00000286294 | 1.818651661 | 0           | 3.196404306  | 0.229186833 | 1           | AC107398.5 |
| ENSG00000259192 | 1.818651661 | 0           | 3.196404306  | 0.229186833 | 1           | AC109631.1 |
| ENSG00000273816 | 1.818651661 | 0           | 3.196404306  | 0.229186833 | 1           | AC005695.3 |
| ENSG00000279954 | 2.987854105 | 0.356539013 | 2.952692872  | 0.229247314 | 0.343309381 | BX324167.2 |
| ENSG00000270077 | 2.987854105 | 0.356539013 | 2.952692872  | 0.229247314 | 0.343309381 | AP003117.1 |
| ENSG00000114999 | 1050.723908 | 1305.630625 | -0.313499034 | 0.229272161 | 0.343326803 | TTL        |
| ENSG00000231327 | 19.18089136 | 9.261713595 | 1.047002456  | 0.229421376 | 0.343530446 | LINC01816  |
| ENSG00000227741 | 16.84227301 | 9.282938566 | 0.858462562  | 0.22947239  | 0.343587031 | AL121987.2 |
| ENSG00000248099 | 1.816144364 | 0           | 3.194649542  | 0.229521624 | 1           | INSL3      |
| ENSG00000288023 | 1.816144364 | 0           | 3.194649542  | 0.229521624 | 1           | AL157936.1 |
| ENSG00000204706 | 1.816144364 | 0           | 3.194649542  | 0.229521624 | 1           | MAMDC2-AS1 |
| ENSG00000242696 | 1.816144364 | 0           | 3.194649542  | 0.229521624 | 1           | RN7SL40P   |
| ENSG00000164076 | 1.816144364 | 0           | 3.194649542  | 0.229521624 | 1           | CAMKV      |
| ENSG00000258696 | 1.816144364 | 0           | 3.194649542  | 0.229521624 | 1           | AL359233.1 |
| ENSG00000213424 | 1.816144364 | 0           | 3.194649542  | 0.229521624 | 1           | KRT222     |
| ENSG00000229992 | 1.816144364 | 0           | 3.194649542  | 0.229521624 | 1           | HMGB3P9    |
| ENSG00000254396 | 1.816144364 | 0           | 3.194649542  | 0.229521624 | 1           | AL355432.1 |
| ENSG00000260695 | 1.816144364 | 0           | 3.194649542  | 0.229521624 | 1           | AC022164.1 |

|                 |             |             |              |             |             |            |
|-----------------|-------------|-------------|--------------|-------------|-------------|------------|
| ENSG00000278330 | 7.561579249 | 3.199394504 | 1.235242483  | 0.229527186 | 0.343649273 | AC018529.2 |
| ENSG00000130779 | 1465.449582 | 1217.703505 | 0.266933783  | 0.229585011 | 0.343696321 | CLIP1      |
| ENSG00000262663 | 7.81699682  | 2.475703993 | 1.652894195  | 0.229585068 | 0.343696321 | AC087222.1 |
| ENSG00000166170 | 706.0564783 | 817.6860808 | -0.211720111 | 0.229648041 | 0.343764782 | BAG5       |
| ENSG00000162669 | 9.279440112 | 4.250098321 | 1.122656724  | 0.229657262 | 0.343764782 | HFM1       |
| ENSG00000141127 | 504.4701097 | 423.1568992 | 0.253034381  | 0.229725686 | 0.343847393 | PRPSAP2    |
| ENSG00000237070 | 1.538018572 | 6.809674718 | -2.157574778 | 0.229791513 | 0.343912565 | AC005550.2 |
| ENSG00000196418 | 98.48810788 | 71.7783951  | 0.4531568    | 0.229795702 | 0.343912565 | ZNF124     |
| ENSG00000090975 | 386.721106  | 301.524906  | 0.359293659  | 0.22983036  | 0.343944622 | PITPNM2    |
| ENSG00000264112 | 428.1478721 | 598.7191807 | -0.483384301 | 0.229867853 | 0.343980917 | AC015813.1 |
| ENSG00000166002 | 131.5194716 | 89.59323937 | 0.552239384  | 0.229883982 | 0.343982308 | SMCO4      |
| ENSG00000278967 | 2.987854105 | 0.336469917 | 2.952687168  | 0.229895262 | 0.343982308 | AL138847.2 |
| ENSG00000103319 | 14.19049762 | 22.17487308 | -0.644151869 | 0.23004751  | 0.344190288 | EEF2K      |
| ENSG00000267662 | 0.879722543 | 4.534533291 | -2.343291281 | 0.230126573 | 0.344288754 | AC025809.1 |
| ENSG00000279140 | 25.65873044 | 16.40888571 | 0.643267202  | 0.230180767 | 0.344350003 | AL590326.1 |
| ENSG00000223695 | 4.266622888 | 1.436768536 | 1.568511659  | 0.230264522 | 0.344455467 | FO393418.1 |
| ENSG00000150433 | 437.1151363 | 371.4247556 | 0.234735191  | 0.230367757 | 0.344590056 | TMEM218    |
| ENSG00000260808 | 12.06349006 | 5.705780078 | 1.077691238  | 0.230384969 | 0.344595964 | AP003096.1 |
| ENSG00000205704 | 0.879722543 | 4.168666062 | -2.234006504 | 0.230443856 | 0.344654403 | LINC00634  |
| ENSG00000258875 | 9.835976429 | 22.51938694 | -1.194910782 | 0.230450571 | 0.344654403 | AL135818.1 |
| ENSG00000104953 | 17.14833508 | 32.3076961  | -0.915722513 | 0.230612654 | 0.344872226 | TLE6       |
| ENSG00000238517 | 3.038213869 | 0.336469917 | 2.974738607  | 0.230622765 | 0.344872226 | MIR1270    |
| ENSG00000161526 | 1826.087729 | 1461.300833 | 0.321529299  | 0.230711256 | 0.344984699 | SAP30BP    |
| ENSG00000178636 | 6.244987189 | 2.089639274 | 1.567379428  | 0.230733479 | 0.344998073 | AC092656.1 |
| ENSG00000233203 | 0.307102255 | 2.089639274 | -2.690319091 | 0.230761188 | 1           | DHCR24-DT  |
| ENSG00000226571 | 8.102715775 | 2.945512721 | 1.473008186  | 0.230797971 | 0.345074644 | AL592429.2 |
| ENSG00000049540 | 529.1589334 | 2083.086405 | -1.976993712 | 0.230856186 | 0.345141821 | ELN        |
| ENSG00000145388 | 544.3209481 | 451.2873718 | 0.270234545  | 0.230936252 | 0.345223499 | METTL14    |
| ENSG00000168386 | 416.3005764 | 570.3162044 | -0.453993054 | 0.230942444 | 0.345223499 | FILIP1L    |
| novel.987       | 112.5686115 | 69.33298751 | 0.699336391  | 0.230950681 | 0.345223499 | -          |
| ENSG00000250131 | 16.20410663 | 8.571016416 | 0.918736904  | 0.231039352 | 0.345336175 | AC078881.1 |
| ENSG00000134717 | 801.9096343 | 978.112764  | -0.286865506 | 0.231078167 | 0.345374324 | BTF3L4     |
| ENSG00000186532 | 286.0417968 | 346.4954286 | -0.276171252 | 0.231106963 | 0.345397493 | SMYD4      |
| ENSG00000146576 | 663.2743158 | 551.7310885 | 0.265641205  | 0.231217885 | 0.345543392 | C7orf26    |
| novel.276       | 1.803536605 | 0           | 3.185741065  | 0.231222112 | 1           | -          |
| ENSG00000181023 | 1.803536605 | 0           | 3.185741065  | 0.231222112 | 1           | OR56B1     |
| ENSG00000283360 | 1.803536605 | 0           | 3.185741065  | 0.231222112 | 1           | AL592295.3 |
| ENSG00000283075 | 1.803536605 | 0           | 3.185741065  | 0.231222112 | 1           | AL157931.2 |
| ENSG00000286802 | 1.803536605 | 0           | 3.185741065  | 0.231222112 | 1           | AC104459.1 |
| ENSG00000223642 | 1.803536605 | 0           | 3.185741065  | 0.231222112 | 1           | AC008277.1 |
| ENSG00000235920 | 1.803536605 | 0           | 3.185741065  | 0.231222112 | 1           | AC073109.1 |
| ENSG00000261202 | 1.803536605 | 0           | 3.185741065  | 0.231222112 | 1           | Z83847.1   |
| ENSG00000276740 | 1.510295757 | 4.250098321 | -1.496186208 | 0.231297199 | 0.34564204  | AL445649.1 |
| ENSG00000237979 | 0.293240848 | 2.089639274 | -2.690297069 | 0.231298899 | 1           | AC007389.4 |
| ENSG00000166455 | 1.802282956 | 0           | 3.184858351  | 0.231391709 | 1           | C16orf46   |
| ENSG00000213703 | 1.802282956 | 0           | 3.184858351  | 0.231391709 | 1           | AL138847.1 |
| ENSG00000259188 | 1.802282956 | 0           | 3.184858351  | 0.231391709 | 1           | AC025040.1 |
| ENSG00000274370 | 1.802282956 | 0           | 3.184858351  | 0.231391709 | 1           | AC130371.2 |
| ENSG00000253168 | 1.802282956 | 0           | 3.184858351  | 0.231391709 | 1           | AC124069.1 |
| ENSG00000223558 | 1.802282956 | 0           | 3.184858351  | 0.231391709 | 1           | TRIM60P17  |
| ENSG00000237640 | 1.802282956 | 0           | 3.184858351  | 0.231391709 | 1           | AC004522.2 |

|                 |             |             |              |             |             |            |
|-----------------|-------------|-------------|--------------|-------------|-------------|------------|
| ENSG00000226342 | 1.802282956 | 0           | 3.184858351  | 0.231391709 | 1           | NMD3P1     |
| ENSG00000253309 | 7.754029298 | 2.406040094 | 1.672812671  | 0.231417334 | 0.345801677 | SERPINE3   |
| novel.50        | 9.080721818 | 2.495773089 | 1.860365838  | 0.231447465 | 0.34582681  | -          |
| ENSG00000159239 | 3.268487194 | 0.723690511 | 2.185791906  | 0.231574245 | 0.345996346 | AC005041.1 |
| ENSG00000114784 | 841.3951324 | 690.6472553 | 0.285098639  | 0.231630835 | 0.346060996 | EIF1B      |
| ENSG00000180189 | 5.408102518 | 1.702418679 | 1.638876527  | 0.231644436 | 0.346061416 | HMGB1P14   |
| ENSG00000109323 | 743.2294268 | 598.0256582 | 0.314034838  | 0.231695773 | 0.346118208 | MANBA      |
| ENSG00000223922 | 1.832513069 | 5.196860638 | -1.498391455 | 0.231719671 | 0.346134006 | ASS1P2     |
| ENSG00000286633 | 0.600343103 | 3.404837359 | -2.508292413 | 0.231752375 | 0.346146829 | AL160400.1 |
| ENSG00000203663 | 3.298717306 | 0.672939833 | 2.249598756  | 0.231754901 | 0.346146829 | OR2L2      |
| ENSG00000157765 | 2.66939774  | 0           | 3.751827051  | 0.232017982 | 1           | SLC34A2    |
| ENSG00000263167 | 2.66939774  | 0           | 3.751827051  | 0.232017982 | 1           | AC115099.1 |
| ENSG00000233791 | 2.66939774  | 0           | 3.751827051  | 0.232017982 | 1           | LINC01136  |
| ENSG00000207308 | 2.66939774  | 0           | 3.751827051  | 0.232017982 | 1           | RNU6-878P  |
| ENSG00000104221 | 112.7671445 | 145.8971008 | -0.372026418 | 0.232039266 | 0.34655163  | BRF2       |
| ENSG00000110921 | 390.3153858 | 301.7712233 | 0.370521107  | 0.232081116 | 0.346585779 | MVK        |
| novel.152       | 14.46640085 | 3.718798035 | 1.966058982  | 0.232088811 | 0.346585779 | -          |
| ENSG00000131941 | 90.97355472 | 66.55992431 | 0.449468961  | 0.232109536 | 0.346596807 | RHPN2      |
| ENSG00000107104 | 706.006688  | 886.815483  | -0.329348687 | 0.232134952 | 0.346614839 | KANK1      |
| ENSG00000202502 | 2.666890443 | 0           | 3.750549336  | 0.232250878 | 1           | RNA5SP151  |
| ENSG00000226758 | 2.666890443 | 0           | 3.750549336  | 0.232250878 | 1           | DISC1-IT1  |
| ENSG00000286891 | 2.666890443 | 0           | 3.750549336  | 0.232250878 | 1           | AC080132.1 |
| ENSG00000251187 | 2.666890443 | 0           | 3.750549336  | 0.232250878 | 1           | AC010261.2 |
| ENSG00000286948 | 2.666890443 | 0           | 3.750549336  | 0.232250878 | 1           | AP000867.5 |
| ENSG00000056586 | 964.0398102 | 1136.257892 | -0.237194933 | 0.232253158 | 0.34677141  | RC3H2      |
| ENSG00000159674 | 1934.209101 | 1219.975484 | 0.664864674  | 0.232276295 | 0.346786026 | SPON2      |
| ENSG00000149016 | 217.5036446 | 264.9785419 | -0.284644124 | 0.232396829 | 0.346946045 | TUT1       |
| ENSG00000266189 | 0           | 2.475703993 | -3.890551144 | 0.232543306 | 1           | MIR3186    |
| ENSG00000079459 | 77.31972067 | 106.063955  | -0.453414118 | 0.232643293 | 0.347294036 | FDFT1      |
| ENSG00000286129 | 8.403478515 | 15.99098353 | -0.927544034 | 0.232797681 | 0.347504542 | AC245060.7 |
| ENSG00000224854 | 3.960774282 | 1.060160428 | 1.890270493  | 0.23284212  | 0.347550909 | CDKN2A-DT  |
| ENSG00000267666 | 3.623441915 | 8.510809128 | -1.233776006 | 0.232917263 | 0.347643098 | AC004156.2 |
| ENSG00000106049 | 613.8946443 | 804.370675  | -0.389767211 | 0.232978193 | 0.347714065 | HIBADH     |
| ENSG00000254433 | 7.210385474 | 2.985650913 | 1.295261983  | 0.233028307 | 0.347768881 | AP001001.1 |
| ENSG00000249863 | 10.62626228 | 17.27421577 | -0.701176917 | 0.233297038 | 0.348149934 | AC021106.1 |
| ENSG00000138741 | 9.786870314 | 4.361056287 | 1.169600652  | 0.23333587  | 0.348178093 | TRPC3      |
| ENSG00000215237 | 9.506237225 | 2.355289417 | 1.992574339  | 0.23334271  | 0.348178093 | AL592293.1 |
| ENSG00000233858 | 2.155984028 | 6.510902848 | -1.600321853 | 0.233451725 | 0.348320753 | LINC02599  |
| ENSG00000119760 | 1155.456761 | 953.771944  | 0.276903504  | 0.233542347 | 0.34842016  | SUPT7L     |
| ENSG00000204052 | 14.6613582  | 25.79435311 | -0.814919646 | 0.233545171 | 0.34842016  | LRRC73     |
| ENSG00000254397 | 1.49643435  | 4.637318915 | -1.626929074 | 0.233640658 | 0.348542601 | AC132192.1 |
| ENSG00000139211 | 223.0975016 | 133.6027568 | 0.738315416  | 0.233687135 | 0.34859192  | AMIGO2     |
| ENSG00000243716 | 325.9619728 | 200.0632691 | 0.704530244  | 0.233828717 | 0.348783092 | NPIP5      |
| ENSG00000130748 | 453.4375414 | 548.7403477 | -0.275388383 | 0.233900568 | 0.348870237 | TMEM160    |
| ENSG00000258515 | 21.72943992 | 11.43638115 | 0.915892249  | 0.233979953 | 0.348952945 | AL355075.2 |
| ENSG00000278002 | 2.450478525 | 0.336469917 | 2.662798713  | 0.233982882 | 0.348952945 | AL627171.1 |
| ENSG00000204520 | 48.23697897 | 110.7507531 | -1.199693891 | 0.234013993 | 0.348979311 | MICA       |
| ENSG00000230267 | 28.26229736 | 12.36996244 | 1.200359539  | 0.234039668 | 0.348997567 | HERC2P4    |
| ENSG00000187624 | 7.016681776 | 2.782648203 | 1.315157606  | 0.234091481 | 0.349039415 | C17orf97   |
| ENSG00000279035 | 3.96328158  | 0.723690511 | 2.457652882  | 0.2340946   | 0.349039415 | AC022211.4 |
| ENSG00000165487 | 741.4133544 | 870.3035896 | -0.231395561 | 0.234224806 | 0.349213513 | MICU2      |

|                 |             |             |              |             |             |             |
|-----------------|-------------|-------------|--------------|-------------|-------------|-------------|
| ENSG00000158113 | 12.13279709 | 6.767096381 | 0.837285459  | 0.234321329 | 0.349337375 | LRRRC43     |
| ENSG00000186265 | 18.6851     | 5.04704875  | 1.877218438  | 0.234393996 | 0.34942566  | BTLA        |
| ENSG00000102931 | 113.5008024 | 85.11056546 | 0.41415094   | 0.234515825 | 0.349587219 | ARL2BP      |
| ENSG00000244232 | 0.293240848 | 2.618499415 | -3.001720026 | 0.234571774 | 0.34965056  | RN7SL698P   |
| ENSG00000228701 | 6.034914786 | 2.079026788 | 1.518428668  | 0.234618919 | 0.34970077  | TNKS2-AS1   |
| ENSG00000162775 | 184.9383407 | 234.5043727 | -0.341767032 | 0.23469119  | 0.349788424 | RBM15       |
| ENSG00000270427 | 3.342808826 | 7.14370449  | -1.099748226 | 0.234714303 | 0.349802805 | NRBF2P5     |
| ENSG00000285509 | 1.525410814 | 4.351599676 | -1.513372757 | 0.23476507  | 0.349858396 | AP000646.1  |
| ENSG00000107882 | 860.1214919 | 654.8852426 | 0.393781201  | 0.234793161 | 0.34988019  | SUFU        |
| ENSG00000176681 | 22.17856119 | 8.721984179 | 1.357079271  | 0.234819807 | 0.349899828 | LRRRC37A    |
| ENSG00000158615 | 1101.229828 | 895.2308488 | 0.298955835  | 0.234893903 | 0.3499735   | PPP1R15B    |
| ENSG00000253559 | 11.39258627 | 5.391691008 | 1.0823307    | 0.234896189 | 0.3499735   | OSGEPL1-AS1 |
| ENSG00000271200 | 6.605027776 | 1.548882377 | 2.12308831   | 0.234946654 | 0.350028615 | AC099791.2  |
| ENSG00000227698 | 0.89358395  | 3.932541625 | -2.130181442 | 0.23496406  | 0.350034475 | AP001619.1  |
| ENSG00000241313 | 9.99443542  | 5.055221091 | 0.986941215  | 0.235011805 | 0.350085528 | WWTR1-AS1   |
| ENSG00000229298 | 2.081662396 | 5.900482053 | -1.486918578 | 0.235081977 | 0.350166936 | TUBB8P1     |
| ENSG00000100360 | 492.2694455 | 605.2596093 | -0.297569619 | 0.235093409 | 0.350166936 | IFT27       |
| ENSG00000180423 | 43.24246793 | 58.61109705 | -0.439478067 | 0.235177236 | 0.350271714 | HARBI1      |
| ENSG00000270638 | 3.89780676  | 1.10029862  | 1.841258428  | 0.235261904 | 0.350364167 | AL023806.1  |
| ENSG00000280351 | 14.70265769 | 24.06968198 | -0.70798633  | 0.235266281 | 0.350364167 | AC127496.7  |
| novel.262       | 3.073529847 | 0.387220594 | 2.990149266  | 0.235283196 | 0.350369274 | -           |
| ENSG00000164107 | 48.62227781 | 20.10645877 | 1.274268173  | 0.235328199 | 0.350416204 | HAND2       |
| ENSG00000269556 | 337.2338209 | 275.3956712 | 0.291370355  | 0.235396159 | 0.350497312 | TMEM185A    |
| ENSG00000100151 | 520.756404  | 386.1012774 | 0.431361288  | 0.235450519 | 0.350558162 | PICK1       |
| ENSG00000251550 | 0.616711807 | 4.106018629 | -2.73923695  | 0.235466786 | 0.350562293 | AC091133.4  |
| ENSG00000230176 | 1.22840902  | 5.105971769 | -2.058828997 | 0.235500793 | 0.35057265  | LINC01433   |
| ENSG00000260063 | 8.781141456 | 15.19647325 | -0.796401844 | 0.235509112 | 0.35057265  | AL512408.1  |
| ENSG00000248256 | 11.7400191  | 6.430626464 | 0.867683195  | 0.235514223 | 0.35057265  | OCIAD1-AS1  |
| ENSG00000167524 | 91.8825819  | 62.25115976 | 0.558990256  | 0.235578647 | 0.350632777 | RSKR        |
| ENSG00000196793 | 101.9542735 | 72.35330121 | 0.492035825  | 0.235581608 | 0.350632777 | ZNF239      |
| ENSG00000228594 | 126.3778556 | 184.2074222 | -0.544550066 | 0.235641077 | 0.350701199 | FNDC10      |
| ENSG00000270084 | 22.31083575 | 14.1031911  | 0.666193985  | 0.23566966  | 0.350705514 | GAS5-AS1    |
| ENSG00000275540 | 7.239361937 | 2.0188195   | 1.816637412  | 0.235670973 | 0.350705514 | AC011477.7  |
| ENSG00000265739 | 0.586481695 | 2.904218654 | -2.283457051 | 0.235694962 | 0.350721123 | AC104984.3  |
| ENSG00000004399 | 3593.1603   | 5919.536057 | -0.720271057 | 0.235806029 | 0.350866298 | PLXND1      |
| ENSG00000188428 | 258.0070799 | 197.2896108 | 0.385760978  | 0.235823414 | 0.350872073 | BLOC1S5     |
| ENSG00000111605 | 1304.488753 | 1509.741747 | -0.210925744 | 0.235891371 | 0.350953085 | CPSF6       |
| novel.679       | 173.5034144 | 258.3839082 | -0.574813446 | 0.235955221 | 0.351027977 | -           |
| ENSG00000112619 | 51.50657692 | 77.18301035 | -0.586034752 | 0.235972932 | 0.351034225 | PRPH2       |
| ENSG00000102531 | 2074.115982 | 1801.732821 | 0.203013295  | 0.23600854  | 0.351067095 | FNDC3A      |
| ENSG00000266786 | 4.691853561 | 0.356539013 | 3.603625625  | 0.236161617 | 0.35125887  | LGALS9DP    |
| ENSG00000164241 | 65.84013374 | 47.71444532 | 0.462681495  | 0.236164503 | 0.35125887  | C5orf63     |
| ENSG00000205592 | 3.073529847 | 0.356539013 | 2.990157228  | 0.236189791 | 0.351276373 | MUC19       |
| ENSG00000284473 | 3.560474393 | 9.416277378 | -1.39455451  | 0.236213373 | 0.351291336 | MIR4720     |
| ENSG00000133678 | 219.6646432 | 270.9572925 | -0.303167582 | 0.236227096 | 0.351291637 | TMEM254     |
| ENSG00000153006 | 503.2837838 | 607.600947  | -0.271404243 | 0.236289386 | 0.351351323 | SREK1IP1    |
| ENSG00000255557 | 1.186824798 | 4.411806964 | -1.878281156 | 0.236294279 | 0.351351323 | AP001266.2  |
| ENSG00000251152 | 4.398612713 | 0           | 4.471745007  | 0.236532304 | 0.351685121 | AC025539.1  |
| ENSG00000253931 | 4.691853561 | 0.336469917 | 3.603622472  | 0.236566794 | 0.351716273 | AC105118.1  |
| ENSG00000273162 | 4.590093848 | 10.21322781 | -1.162265107 | 0.236659751 | 0.351834343 | AL133215.2  |
| ENSG00000102078 | 165.6182936 | 202.4433323 | -0.288985409 | 0.2366848   | 0.351842186 | SLC25A14    |

|                 |             |             |              |             |             |            |
|-----------------|-------------|-------------|--------------|-------------|-------------|------------|
| ENSG00000239608 | 0.308355904 | 2.587817834 | -2.986569042 | 0.236702885 | 0.351842186 | RUVBL1-AS1 |
| ENSG00000272308 | 10.69048345 | 4.923038154 | 1.107682145  | 0.236711409 | 0.351842186 | AC104113.1 |
| ENSG00000169220 | 175.4453081 | 121.5631813 | 0.528592778  | 0.236719195 | 0.351842186 | RGS14      |
| ENSG00000171735 | 730.6203005 | 590.8939789 | 0.306747702  | 0.236741246 | 0.35184927  | CAMTA1     |
| ENSG00000228061 | 0.307102255 | 2.587817834 | -2.986570176 | 0.236751047 | 0.35184927  | AC131571.1 |
| ENSG00000252585 | 3.240764379 | 0.387220594 | 3.071017376  | 0.236799758 | 0.351901534 | RF00019    |
| ENSG00000182118 | 109.0011141 | 141.939143  | -0.382603529 | 0.236847145 | 0.351939378 | FAM89A     |
| ENSG00000243389 | 9.356269041 | 4.279624027 | 1.125642616  | 0.236863618 | 0.351939378 | AC012442.2 |
| ENSG00000230650 | 3.970874743 | 8.784760006 | -1.15555105  | 0.236865862 | 0.351939378 | AC140479.2 |
| ENSG00000072401 | 417.4364723 | 514.1291744 | -0.300643327 | 0.236903876 | 0.351975731 | UBE2D1     |
| ENSG00000162194 | 49.88134422 | 70.55742512 | -0.501200723 | 0.236946459 | 0.352018867 | LBHD1      |
| ENSG00000286878 | 1.218308559 | 6.552068521 | -2.422834571 | 0.237044225 | 0.352132785 | AC100805.1 |
| ENSG00000278959 | 20.4027474  | 10.07732046 | 1.029242865  | 0.237050245 | 0.352132785 | AC006378.2 |
| ENSG00000245067 | 3.634796025 | 1.049547942 | 1.772536265  | 0.237116536 | 0.352211121 | IGFBP7-AS1 |
| ENSG00000106344 | 571.0578506 | 768.7155013 | -0.428881413 | 0.237223937 | 0.352320814 | RBM28      |
| ENSG00000213683 | 0.586481695 | 2.884149558 | -2.275080997 | 0.237239047 | 0.352320814 | AC002056.1 |
| ENSG00000267769 | 11.38882532 | 19.88223109 | -0.803292381 | 0.237255007 | 0.352320814 | AC011498.6 |
| ENSG00000281160 | 2.773949485 | 0           | 3.804404919  | 0.237274075 | 0.352320814 | AC018358.1 |
| ENSG00000211779 | 2.773949485 | 0           | 3.804404919  | 0.237274075 | 0.352320814 | TRAV5      |
| ENSG00000184697 | 0.293240848 | 2.587817834 | -2.98658273  | 0.237285308 | 0.352320814 | CLDN6      |
| ENSG00000234650 | 0.293240848 | 2.587817834 | -2.98658273  | 0.237285308 | 0.352320814 | PCCA-AS1   |
| ENSG00000232850 | 6.392376805 | 12.37009083 | -0.950881069 | 0.237434473 | 0.352522146 | AL590708.1 |
| ENSG00000223612 | 18.2520627  | 28.11780507 | -0.623719514 | 0.237477907 | 0.352566485 | AC241585.1 |
| ENSG00000151233 | 694.4592622 | 516.6454142 | 0.426209847  | 0.237513491 | 0.352599166 | GXYLT1     |
| ENSG00000258711 | 3.043299735 | 0.387220594 | 2.976993692  | 0.237556741 | 0.352643223 | AL358334.2 |
| novel.741       | 190.6199104 | 257.5315236 | -0.432781931 | 0.237591143 | 0.352674141 | -          |
| ENSG00000204519 | 80.28418238 | 106.0290823 | -0.402452737 | 0.237665146 | 0.352763834 | ZNF551     |
| ENSG00000172375 | 381.6698088 | 317.5612935 | 0.265837176  | 0.237833417 | 0.35299343  | C2CD2L     |
| ENSG00000277895 | 0.615458159 | 3.281982638 | -2.421016981 | 0.238017577 | 0.353219515 | AC135279.3 |
| ENSG00000062650 | 937.8694884 | 1109.054032 | -0.241907761 | 0.238027858 | 0.353219515 | WAPL       |
| ENSG00000103248 | 416.0905634 | 330.5794688 | 0.331475997  | 0.238043951 | 0.353219515 | MTHFSD     |
| novel.329       | 2.765173943 | 0           | 3.800061252  | 0.238053721 | 0.353219515 | -          |
| ENSG00000140478 | 2.765173943 | 0           | 3.800061252  | 0.238053721 | 0.353219515 | GOLGA6D    |
| ENSG00000207750 | 0.601596751 | 3.423622185 | -2.494963018 | 0.238104311 | 0.353274405 | MIR553     |
| ENSG00000274769 | 3.240764379 | 0.336469917 | 3.070998046  | 0.238160249 | 0.353331805 | AC016747.4 |
| ENSG00000109083 | 423.9959133 | 510.5573629 | -0.267546403 | 0.238170878 | 0.353331805 | IFT20      |
| ENSG00000204256 | 205.9327992 | 48.36774842 | 2.089405526  | 0.238183797 | 0.353331805 | BRD2       |
| ENSG00000283839 | 20.85089976 | 9.119817259 | 1.205575227  | 0.238409876 | 0.353646988 | AC096667.1 |
| ENSG00000105865 | 3.035706571 | 6.828459544 | -1.17036348  | 0.238462059 | 0.353695126 | DUS4L      |
| ENSG00000226167 | 14.72912685 | 6.237080364 | 1.229802681  | 0.238469556 | 0.353695126 | AP4B1-AS1  |
| ENSG00000205078 | 17.31195121 | 30.1211318  | -0.795975107 | 0.238507208 | 0.353713085 | SYCE1L     |
| ENSG00000273768 | 2.760088077 | 0           | 3.797521198  | 0.238508892 | 0.353713085 | RF00003    |
| ENSG00000136877 | 1135.166244 | 1410.603259 | -0.31326092  | 0.238603761 | 0.35383358  | FPGS       |
| ENSG00000109016 | 418.514885  | 342.843178  | 0.287138909  | 0.238651851 | 0.353884695 | DHRS7B     |
| ENSG00000189334 | 4.583825605 | 1.069617038 | 2.093394425  | 0.238720427 | 0.35396618  | S100A14    |
| ENSG00000121057 | 510.9701143 | 396.3976413 | 0.365990655  | 0.238739933 | 0.353974902 | AKAP1      |
| ENSG00000273724 | 7.217907366 | 1.682349583 | 2.077856362  | 0.23881269  | 0.354062572 | AC106782.5 |
| ENSG00000272100 | 4.203655366 | 9.528391219 | -1.171973954 | 0.238892024 | 0.354159982 | AL513218.1 |
| ENSG00000070404 | 4910.439402 | 6401.34406  | -0.382576488 | 0.239201475 | 0.354598512 | FSTL3      |
| ENSG00000226937 | 9.643241645 | 3.904171794 | 1.301164706  | 0.23925033  | 0.354650701 | CEP164P1   |
| ENSG00000132017 | 564.7240939 | 669.2505946 | -0.245017281 | 0.239303144 | 0.354707068 | DCAF15     |

|                 |             |             |              |             |             |             |
|-----------------|-------------|-------------|--------------|-------------|-------------|-------------|
| ENSG00000118961 | 342.6660709 | 428.5818404 | -0.322898597 | 0.239315662 | 0.354707068 | LDAH        |
| ENSG00000140612 | 2217.549129 | 2650.15075  | -0.257205087 | 0.23934752  | 0.35473405  | SEC11A      |
| ENSG00000287333 | 2.750058887 | 0           | 3.792533678  | 0.239407411 | 0.354782337 | AL161447.2  |
| ENSG00000109991 | 2.750058887 | 0           | 3.792533678  | 0.239407411 | 0.354782337 | P2RX3       |
| ENSG00000096872 | 275.8098509 | 325.8175785 | -0.24024313  | 0.239538703 | 0.354956655 | IFT74       |
| ENSG00000201240 | 0           | 2.406040094 | -3.85177981  | 0.239640579 | 1           | SNORD114-9  |
| ENSG00000231167 | 5.419456628 | 10.73147546 | -0.984141922 | 0.239656132 | 0.355110412 | YBX1P2      |
| ENSG00000185522 | 7.946479348 | 1.548882377 | 2.384470649  | 0.239823584 | 0.355338269 | LMNTD2      |
| ENSG00000237351 | 1.17296339  | 5.04345273  | -2.090046979 | 0.239864694 | 0.355363072 | AL513366.1  |
| ENSG00000275494 | 24.42906777 | 14.7774152  | 0.718573302  | 0.239876722 | 0.355363072 | AC133552.5  |
| ENSG00000153823 | 313.2686015 | 639.2157373 | -1.028903524 | 0.239881358 | 0.355363072 | PID1        |
| ENSG00000178809 | 16.99224119 | 9.141299019 | 0.885780944  | 0.23989731  | 0.355503347 | TRIM73      |
| ENSG00000118600 | 181.2618457 | 248.8851236 | -0.45862617  | 0.24006339  | 0.355592186 | RXYLT1      |
| ENSG00000207959 | 1.17296339  | 4.758889366 | -2.001942901 | 0.240082046 | 0.355599547 | MIR656      |
| ENSG00000120910 | 430.4744365 | 364.1851536 | 0.241512998  | 0.240148372 | 0.355677509 | PPP3CC      |
| ENSG00000279636 | 9.538689901 | 3.882946823 | 1.292357528  | 0.240166806 | 0.355684534 | AL132989.2  |
| ENSG00000227799 | 18.82719029 | 28.85925293 | -0.615849159 | 0.240340154 | 0.355920973 | AC012358.2  |
| ENSG00000217488 | 2.374903244 | 0.356539013 | 2.623668667  | 0.240387702 | 0.355971096 | AL356057.1  |
| ENSG00000267750 | 3.94189828  | 10.1894343  | -1.362164624 | 0.24042242  | 0.356002217 | RUNDC3A-AS1 |
| ENSG00000253408 | 2.124500267 | 0.387220594 | 2.458440088  | 0.240521049 | 1           | AC083973.1  |
| ENSG00000271185 | 2.124500267 | 0.387220594 | 2.458440088  | 0.240521049 | 1           | AC007029.1  |
| novel.324       | 35.68876658 | 22.62461271 | 0.656558347  | 0.240539625 | 0.356139562 | -           |
| ENSG00000133983 | 85.45134164 | 62.59798537 | 0.44734701   | 0.24054259  | 0.356139562 | COX16       |
| ENSG00000273084 | 13.7451373  | 6.307900138 | 1.113531762  | 0.240596077 | 0.356198454 | AC092171.5  |
| ENSG00000178761 | 394.8090902 | 334.8510832 | 0.238220836  | 0.24065627  | 0.356250061 | FAM219B     |
| ENSG00000119283 | 12.80495453 | 4.394178013 | 1.526074162  | 0.240658359 | 0.356250061 | TRIM67      |
| ENSG00000261723 | 3.85371524  | 0.723690511 | 2.421076008  | 0.240736269 | 0.35634509  | AC008870.4  |
| ENSG00000168517 | 69.17298465 | 50.47201574 | 0.458254741  | 0.240855769 | 0.356501666 | HEXIM2      |
| ENSG00000110851 | 685.1659325 | 818.7662632 | -0.256852569 | 0.240918799 | 0.356574645 | PRDM4       |
| ENSG00000221539 | 9.91760649  | 3.749479616 | 1.419976473  | 0.240951528 | 0.356602771 | SNORD99     |
| ENSG00000149657 | 799.3102434 | 940.8676803 | -0.234937706 | 0.240994838 | 0.356646553 | LSM14B      |
| novel.398       | 33.62855875 | 17.94355958 | 0.909136108  | 0.241099607 | 0.356772515 | -           |
| ENSG00000132321 | 17.03500779 | 7.206351922 | 1.228924848  | 0.241107418 | 0.356772515 | IQCA1       |
| ENSG00000273139 | 5.74042029  | 2.140389951 | 1.420515496  | 0.241141669 | 0.356802877 | AC007663.3  |
| ENSG00000272646 | 3.678887545 | 1.080229524 | 1.766820186  | 0.241177988 | 0.356815974 | AC079766.1  |
| ENSG00000251535 | 3.678887545 | 1.080229524 | 1.766820186  | 0.241177988 | 0.356815974 | AC079140.4  |
| ENSG00000224875 | 3.297463658 | 0.713078025 | 2.205549845  | 0.24121692  | 0.356853251 | AC083949.1  |
| ENSG00000114353 | 8530.094575 | 10432.90267 | -0.290478971 | 0.241250921 | 0.35688323  | GNAI2       |
| ENSG00000165966 | 3.992258043 | 0.713078025 | 2.478461567  | 0.241316701 | 0.356960215 | PDZRN4      |
| ENSG00000121058 | 274.4854801 | 333.3060065 | -0.280129982 | 0.241544058 | 0.357252217 | COIL        |
| ENSG00000139218 | 2098.630998 | 1797.361524 | 0.223595516  | 0.241548497 | 0.357252217 | SCAF11      |
| ENSG00000267432 | 1.22840902  | 6.889951102 | -2.495096979 | 0.241558599 | 0.357252217 | DNAH17-AS1  |
| ENSG00000271590 | 9.838198992 | 4.310305609 | 1.19376823   | 0.241569106 | 0.357252217 | AC108463.3  |
| ENSG00000258476 | 1.833766717 | 0           | 3.207108638  | 0.241735126 | 1           | LINC02207   |
| ENSG00000119614 | 1.833766717 | 0           | 3.207108638  | 0.241735126 | 1           | VSX2        |
| ENSG00000254924 | 1.833766717 | 0           | 3.207108638  | 0.241735126 | 1           | AP000867.2  |
| ENSG00000254880 | 1.833766717 | 0           | 3.207108638  | 0.241735126 | 1           | PKNOX2-AS1  |
| ENSG00000230054 | 1.833766717 | 0           | 3.207108638  | 0.241735126 | 1           | TEX53       |
| ENSG00000163348 | 847.8386519 | 694.584934  | 0.287734626  | 0.241790897 | 0.357549487 | PYGO2       |
| ENSG00000249947 | 9.65961035  | 4.973788832 | 0.952847573  | 0.24179764  | 0.357549487 | XBP1P1      |
| ENSG00000279667 | 6.417592322 | 1.682349583 | 1.902836718  | 0.241840655 | 0.357572242 | AL603839.4  |

|                 |             |             |              |             |             |            |
|-----------------|-------------|-------------|--------------|-------------|-------------|------------|
| ENSG00000023445 | 768.7907175 | 528.4787387 | 0.541214068  | 0.241851854 | 0.357572242 | BIRC3      |
| ENSG00000113441 | 1146.040841 | 969.2292548 | 0.241793764  | 0.241854317 | 0.357572242 | LNPEP      |
| ENSG00000067445 | 500.6961586 | 620.1724995 | -0.308347347 | 0.241962982 | 0.357712543 | TRO        |
| ENSG00000258561 | 6.023560676 | 2.486316478 | 1.271213213  | 0.241991377 | 0.357720758 | AL359232.1 |
| ENSG00000254855 | 9.636973401 | 4.055267952 | 1.260794485  | 0.241996076 | 0.357720758 | AP001107.8 |
| ENSG00000163995 | 33.47977294 | 50.91396822 | -0.608289073 | 0.242142036 | 0.357916154 | ABLIM2     |
| ENSG00000251441 | 3.649911081 | 1.060160428 | 1.771700255  | 0.242199566 | 0.357980825 | RTEL1P1    |
| ENSG00000161973 | 1.830005771 | 0           | 3.204467564  | 0.242245414 | 1           | CCDC42     |
| ENSG00000271156 | 1.830005771 | 0           | 3.204467564  | 0.242245414 | 1           | AC090578.2 |
| ENSG00000228804 | 1.830005771 | 0           | 3.204467564  | 0.242245414 | 1           | AC072022.1 |
| ENSG00000224478 | 1.830005771 | 0           | 3.204467564  | 0.242245414 | 1           | AL356417.1 |
| ENSG00000239472 | 1.830005771 | 0           | 3.204467564  | 0.242245414 | 1           | RN7SL221P  |
| ENSG00000182095 | 2300.024602 | 1913.814346 | 0.265093843  | 0.242290225 | 0.35809445  | TNRC18     |
| ENSG00000256898 | 3.631035079 | 0.774441189 | 2.276453545  | 0.242452402 | 0.358313758 | AP002770.2 |
| ENSG00000255478 | 2.124500267 | 0.336469917 | 2.458447071  | 0.242493187 | 1           | AP000944.1 |
| ENSG00000169203 | 23.49013866 | 14.52237754 | 0.689664463  | 0.242514254 | 0.358384781 | NPIPB12    |
| ENSG00000115289 | 330.3083711 | 266.9169566 | 0.30793136   | 0.242570494 | 0.358447503 | PCGF1      |
| ENSG00000257718 | 4.601447958 | 1.00940975  | 2.152519103  | 0.24258752  | 0.358452275 | CPNE8-AS1  |
| ENSG00000132570 | 146.5606874 | 107.6268359 | 0.443294481  | 0.242612168 | 0.358453655 | PCBD2      |
| ENSG00000270923 | 7.446927043 | 2.558292127 | 1.552288306  | 0.24262957  | 0.358453655 | TAS2R6P    |
| ENSG00000156689 | 12.56465202 | 24.88528884 | -0.985799186 | 0.242629844 | 0.358453655 | GLYATL2    |
| ENSG00000241157 | 0.293240848 | 2.71182843  | -3.066605857 | 0.242751512 | 0.358613012 | AC104763.1 |
| ENSG00000128656 | 839.0353419 | 583.6257627 | 0.523549357  | 0.24284404  | 0.358729304 | CHN1       |
| ENSG00000279738 | 23.18178275 | 35.10938592 | -0.600138386 | 0.242900007 | 0.358791579 | AL022311.1 |
| ENSG00000286276 | 2.11063886  | 0.356539013 | 2.450671086  | 0.243156614 | 1           | AL390066.2 |
| ENSG00000219392 | 1.17296339  | 4.697526203 | -1.985594617 | 0.243163325 | 0.359126914 | ZNF602P    |
| ENSG00000269836 | 2.052685933 | 8.110535903 | -1.970452775 | 0.243167946 | 0.359126914 | AC020913.3 |
| ENSG00000172738 | 12.067251   | 5.932447905 | 1.012943776  | 0.243168495 | 0.359126914 | TMEM217    |
| ENSG00000093134 | 3.944405577 | 12.6248717  | -1.673290389 | 0.243315848 | 0.359324109 | VNN3       |
| ENSG00000092820 | 1326.849446 | 1898.099188 | -0.516715544 | 0.243359308 | 0.359345592 | EZR        |
| ENSG00000144355 | 302.1840912 | 171.3855243 | 0.819176569  | 0.243368471 | 0.359345592 | DLX1       |
| ENSG00000251131 | 6.64403343  | 1.782695063 | 1.894642647  | 0.243378701 | 0.359345592 | AC025171.3 |
| ENSG00000204152 | 94.98627059 | 125.9586436 | -0.407746204 | 0.24338572  | 0.359345592 | TIMM23B    |
| ENSG00000143514 | 670.1733955 | 797.6051194 | -0.25096449  | 0.243400175 | 0.359346513 | TP53BP2    |
| ENSG00000221944 | 121.981794  | 97.04962027 | 0.329801316  | 0.243576228 | 0.359585999 | TIGD1      |
| ENSG00000120675 | 883.1476898 | 728.631077  | 0.277475524  | 0.243636366 | 0.359645788 | DNAJC15    |
| ENSG00000259381 | 6.09662866  | 2.231278821 | 1.467454537  | 0.243644414 | 0.359645788 | AC090695.1 |
| ENSG00000280388 | 7.635900881 | 13.73719547 | -0.848634101 | 0.243782749 | 0.359829542 | AC006330.1 |
| ENSG00000077782 | 1758.549916 | 2817.929001 | -0.680257812 | 0.243844256 | 0.359899882 | FGFR1      |
| ENSG00000232677 | 275.394792  | 205.1677939 | 0.423444743  | 0.243918323 | 0.359975029 | LINC00665  |
| ENSG00000259605 | 22.70737469 | 38.63780151 | -0.763600579 | 0.243923689 | 0.359975029 | AC074212.1 |
| novel.915       | 2718.310717 | 4437.742907 | -0.707105512 | 0.24394843  | 0.359975029 | -          |
| ENSG00000157933 | 2057.749969 | 2533.814164 | -0.300336666 | 0.243950592 | 0.359975029 | SKI        |
| ENSG00000243289 | 14.91656231 | 7.103566298 | 1.069100351  | 0.243991705 | 0.359998439 | AGAP13P    |
| ENSG00000251370 | 2.96013129  | 0.387220594 | 2.940249619  | 0.243994169 | 0.359998439 | SEMA5A-AS1 |
| ENSG00000279110 | 5.688735607 | 1.813376645 | 1.656157408  | 0.244044386 | 0.360052083 | AL022323.4 |
| ENSG00000267939 | 6.679349408 | 13.26982689 | -0.997886625 | 0.244065182 | 0.360062319 | AC008946.1 |
| ENSG00000188388 | 0.307102255 | 2.50754145  | -2.945717359 | 0.244125807 | 0.360131308 | GOLGA6L3   |
| ENSG00000259244 | 3.615920022 | 0.693008929 | 2.361978876  | 0.244232563 | 0.360268337 | AC048382.2 |
| ENSG00000105290 | 264.7446669 | 206.2319698 | 0.359810673  | 0.244308064 | 0.360359249 | APLP1      |
| ENSG00000255302 | 6178.93119  | 5084.297762 | 0.281293909  | 0.244437238 | 0.360529315 | EID1       |



|                 |             |             |              |             |             |                |
|-----------------|-------------|-------------|--------------|-------------|-------------|----------------|
| ENSG00000101405 | 3.063429386 | 0.743759607 | 2.065396325  | 0.24451324  | 0.360620941 | OXT            |
| ENSG00000145715 | 734.3737506 | 868.5056582 | -0.242375094 | 0.244584561 | 0.360705653 | RASA1          |
| ENSG00000110628 | 24.4417468  | 44.65270916 | -0.866493001 | 0.245042859 | 0.361361024 | SLC22A18       |
| ENSG00000206560 | 1377.482505 | 1725.249776 | -0.324665806 | 0.245205132 | 0.361579802 | ANKRD28        |
| ENSG00000173451 | 136.1546258 | 97.65272063 | 0.479992209  | 0.245337884 | 0.361755027 | THAP2          |
| ENSG00000277039 | 2.962638588 | 0.336469917 | 2.941343519  | 0.245390597 | 0.361812219 | RF00017        |
| ENSG00000231731 | 47.08078338 | 28.9644787  | 0.698679298  | 0.245528154 | 0.361994494 | AC010976.1     |
| ENSG00000143552 | 9.355015392 | 4.575955752 | 1.021918005  | 0.245641648 | 0.362141273 | NUP210L        |
| ENSG00000240440 | 0.616711807 | 2.884149558 | -2.23627589  | 0.24570911  | 0.36220323  | AC007879.4     |
| ENSG00000242352 | 3.883945353 | 1.10029862  | 1.836382179  | 0.245711556 | 0.36220323  | FAM91A3P       |
| ENSG00000260285 | 50.89194548 | 33.66876458 | 0.60129593   | 0.245735224 | 0.362217568 | AL133367.1     |
| ENSG00000229512 | 14.17914351 | 7.806031838 | 0.856496478  | 0.245768466 | 0.362246015 | AC068580.1     |
| ENSG00000274897 | 11.25056725 | 19.17860968 | -0.773916882 | 0.245784882 | 0.36224966  | PANO1          |
| ENSG00000282995 | 9.537436252 | 3.495726228 | 1.440316191  | 0.24598384  | 0.362522329 | FRG1EP         |
| ENSG00000272345 | 20.98317432 | 8.928839698 | 1.222969716  | 0.246206956 | 0.362830568 | AL031775.1     |
| ENSG00000258738 | 41.97623563 | 28.54387959 | 0.562942785  | 0.246262669 | 0.362892088 | AL121603.2     |
| ENSG00000152705 | 7.503626321 | 2.731897526 | 1.43633164   | 0.246420159 | 0.36310357  | CATSPER3       |
| ENSG00000188981 | 13.44151126 | 6.888666832 | 0.971375926  | 0.246437175 | 0.363108049 | MSANTD1        |
| ENSG00000279500 | 9.699940923 | 16.39583308 | -0.752882656 | 0.24653216  | 0.363227405 | AC108704.2     |
| ENSG00000143217 | 7.572862087 | 1.874739808 | 2.028928481  | 0.246624957 | 0.363342329 | NECTIN4        |
| ENSG00000272153 | 24.46807343 | 14.33114319 | 0.763542059  | 0.2466441   | 0.363342329 | AL365330.1     |
| ENSG00000223842 | 0.601596751 | 3.108505634 | -2.373606754 | 0.24666543  | 0.363342329 | AL360093.1     |
| ENSG00000171757 | 59.61179999 | 82.1766927  | -0.464048722 | 0.246666102 | 0.363342329 | LRRC34         |
| ENSG00000224848 | 29.95167996 | 17.4760626  | 0.781055099  | 0.246745478 | 0.363438646 | AL589843.1     |
| ENSG00000162927 | 161.5900354 | 129.3280475 | 0.319523005  | 0.246882759 | 0.363620235 | PUS10          |
| ENSG00000148337 | 1666.375093 | 1998.425869 | -0.262041805 | 0.24691919  | 0.363653278 | CIZ1           |
| ENSG00000087299 | 114.6095446 | 142.7747718 | -0.317942577 | 0.246940025 | 0.363663349 | L2HGDH         |
| ENSG00000163681 | 801.6156811 | 970.3675086 | -0.27555462  | 0.247004684 | 0.363737953 | SLMAP          |
| ENSG00000237523 | 32.15788156 | 46.25632342 | -0.522729896 | 0.247067089 | 0.36380923  | LINC00857      |
| ENSG00000285692 | 5.337541832 | 1.487519214 | 1.863617785  | 0.247207977 | 0.363996058 | AC023509.5     |
| ENSG00000280916 | 44.63749822 | 18.63083631 | 1.25796334   | 0.247243272 | 0.364027397 | FOXCUT         |
| ENSG00000254154 | 12.30762479 | 6.410557368 | 0.939617069  | 0.247263799 | 0.364031139 | CRYZL2P-SEC16B |
| ENSG00000264635 | 1.203193503 | 3.882946823 | -1.691572875 | 0.247274519 | 0.364031139 | AP001020.2     |
| ENSG00000157617 | 1111.82487  | 1493.869192 | -0.426189655 | 0.247287847 | 0.364031139 | C2CD2          |
| ENSG00000267219 | 6.355878449 | 2.221822211 | 1.532284822  | 0.247306917 | 0.364038584 | AC010504.1     |
| ENSG00000165219 | 1452.182762 | 1125.600448 | 0.367654876  | 0.247340431 | 0.36406729  | GAPVD1         |
| ENSG00000142178 | 43.05801014 | 105.4020128 | -1.291042495 | 0.247372572 | 0.364088159 | SIK1           |
| ENSG00000152104 | 1350.469926 | 1682.301981 | -0.316885475 | 0.247382636 | 0.364088159 | PTPN14         |
| ENSG00000080200 | 392.2810704 | 300.7099754 | 0.384021214  | 0.247474758 | 0.364194225 | CRYBG3         |
| ENSG00000176659 | 65.09401068 | 32.18697756 | 1.019561099  | 0.247486036 | 0.364194225 | C20orf197      |
| ENSG00000186283 | 643.2418078 | 845.7544108 | -0.395262864 | 0.247496757 | 0.364194225 | TOR3A          |
| ENSG00000228323 | 6.652880242 | 2.954969332 | 1.188561089  | 0.247524837 | 0.364214917 | AC008440.1     |
| ENSG00000183943 | 538.5776492 | 408.3730971 | 0.399675947  | 0.247550983 | 0.36423276  | PRKX           |
| ENSG00000196420 | 7.547717841 | 3.647978261 | 1.059874439  | 0.247667023 | 0.364371167 | S100A5         |
| ENSG00000254419 | 13.55867076 | 7.878007486 | 0.783750288  | 0.2476731   | 0.364371167 | AL139349.1     |
| ENSG00000174473 | 7.944328055 | 2.42610919  | 1.697283529  | 0.247702946 | 0.364389318 | GALNTL6        |
| ENSG00000216588 | 0.616711807 | 2.934900236 | -2.256986066 | 0.247727513 | 0.364389318 | IGSF23         |
| ENSG00000259709 | 0.616711807 | 2.934900236 | -2.256986066 | 0.247727513 | 0.364389318 | AC023906.4     |
| ENSG00000177673 | 0           | 2.261960402 | -3.753804897 | 0.247751947 | 1           | TEX44          |
| ENSG00000231971 | 0           | 2.261960402 | -3.753804897 | 0.247751947 | 1           | CT69           |
| ENSG00000248530 | 0           | 2.261960402 | -3.753804897 | 0.247751947 | 1           | BCL2L12P1      |

|                 |             |             |              |             |             |            |
|-----------------|-------------|-------------|--------------|-------------|-------------|------------|
| ENSG00000236457 | 0           | 2.261960402 | -3.753804897 | 0.247751947 | 1           | AC090617.1 |
| ENSG00000170231 | 0           | 2.261960402 | -3.753804897 | 0.247751947 | 1           | FABP6      |
| ENSG00000257477 | 0           | 2.261960402 | -3.753804897 | 0.247751947 | 1           | LINC01154  |
| novel.814       | 164.6254858 | 101.3929664 | 0.698659552  | 0.24788282  | 0.364597121 | -          |
| ENSG00000225484 | 172.3977496 | 213.8706421 | -0.312086339 | 0.247946111 | 0.364669567 | NUTM2B-AS1 |
| ENSG00000273338 | 3.925529575 | 8.314822883 | -1.079325471 | 0.24798129  | 0.364700662 | AC103591.3 |
| ENSG00000075142 | 1488.737641 | 1734.546449 | -0.220460712 | 0.248009656 | 0.364721734 | SRI        |
| ENSG00000233191 | 1.788421549 | 0           | 3.174828358  | 0.248015524 | 1           | AC006372.2 |
| ENSG00000203908 | 1.788421549 | 0           | 3.174828358  | 0.248015524 | 1           | KHDC3L     |
| ENSG00000114455 | 1.788421549 | 0           | 3.174828358  | 0.248015524 | 1           | HHLA2      |
| ENSG00000276668 | 1.788421549 | 0           | 3.174828358  | 0.248015524 | 1           | AC104237.3 |
| ENSG00000167210 | 1.788421549 | 0           | 3.174828358  | 0.248015524 | 1           | LOXHD1     |
| ENSG00000287490 | 1.788421549 | 0           | 3.174828358  | 0.248015524 | 1           | AC015818.9 |
| ENSG00000232528 | 1.788421549 | 0           | 3.174828358  | 0.248015524 | 1           | AL109809.1 |
| ENSG00000276180 | 95.30669227 | 66.83246253 | 0.512557743  | 0.248031209 | 0.364732785 | HIST1H4I   |
| ENSG00000227852 | 0           | 2.231278821 | -3.735438932 | 0.248207694 | 1           | RPS29P17   |
| ENSG00000184115 | 0           | 2.231278821 | -3.735438932 | 0.248207694 | 1           | AC112229.1 |
| ENSG00000253335 | 0           | 2.231278821 | -3.735438932 | 0.248207694 | 1           | AC009884.1 |
| ENSG00000119913 | 0           | 2.231278821 | -3.735438932 | 0.248207694 | 1           | TECTB      |
| ENSG00000260701 | 0           | 2.231278821 | -3.735438932 | 0.248207694 | 1           | AC025284.1 |
| ENSG00000232300 | 2.654282684 | 0           | 3.743946087  | 0.248269091 | 1           | FAM215B    |
| novel.401       | 2.654282684 | 0           | 3.743946087  | 0.248269091 | 1           | -          |
| ENSG00000258928 | 2.654282684 | 0           | 3.743946087  | 0.248269091 | 1           | AL358333.2 |
| ENSG00000260776 | 2.653029035 | 0           | 3.743301458  | 0.248388271 | 1           | AC104758.3 |
| ENSG00000279042 | 2.653029035 | 0           | 3.743301458  | 0.248388271 | 1           | AP005242.4 |
| ENSG00000200753 | 2.653029035 | 0           | 3.743301458  | 0.248388271 | 1           | RF00275    |
| ENSG00000112739 | 1588.043217 | 1354.954729 | 0.228996476  | 0.248434705 | 0.365305454 | PRPF4B     |
| ENSG00000232600 | 3.36043118  | 8.102363562 | -1.277829124 | 0.248472013 | 0.365339636 | TONSL-AS1  |
| ENSG00000110046 | 564.555792  | 704.5207776 | -0.319013539 | 0.248505545 | 0.365368262 | ATG2A      |
| ENSG00000286874 | 4.202401718 | 1.080229524 | 1.963375152  | 0.248569085 | 0.365441002 | AC072054.1 |
| ENSG00000079101 | 5.484931447 | 1.762625967 | 1.626122839  | 0.24861608  | 0.365489412 | CLUL1      |
| ENSG00000231861 | 4.747299191 | 0.774441189 | 2.652718043  | 0.248953004 | 0.365964014 | OR5K2      |
| ENSG00000007545 | 383.6497553 | 315.5934814 | 0.282271432  | 0.249014421 | 0.366033588 | CRAMP1     |
| ENSG00000219932 | 0.89358395  | 3.210006989 | -1.83616557  | 0.249111153 | 0.366155061 | RPL12P8    |
| ENSG00000162607 | 735.2535017 | 921.1723762 | -0.325556301 | 0.249177044 | 0.366231192 | USP1       |
| ENSG00000081026 | 219.2028432 | 170.4172456 | 0.362290878  | 0.249268251 | 0.36634452  | MAGI3      |
| ENSG00000274515 | 6.596180964 | 2.435565801 | 1.423077655  | 0.249371468 | 0.366475485 | AC105020.5 |
| ENSG00000129559 | 48.43477144 | 26.02102094 | 0.898230773  | 0.249407718 | 0.366502887 | NEDD8      |
| ENSG00000248127 | 2.461832635 | 0           | 3.632113548  | 0.249409231 | 1           | AC026774.1 |
| ENSG00000254965 | 2.461832635 | 0           | 3.632113548  | 0.249409231 | 1           | C1DP5      |
| ENSG00000259724 | 2.461832635 | 0           | 3.632113548  | 0.249409231 | 1           | LINC01581  |
| ENSG00000211640 | 2.461832635 | 0           | 3.632113548  | 0.249409231 | 1           | IGLV6-57   |
| ENSG00000268401 | 6.248748136 | 1.803920035 | 1.797286171  | 0.249418327 | 0.366502887 | AC007785.3 |
| ENSG00000178015 | 19.11792384 | 11.69013454 | 0.703081382  | 0.249663031 | 0.366841715 | GPR150     |
| ENSG00000125895 | 10.01205777 | 22.67151058 | -1.174668786 | 0.249756178 | 0.366957828 | TMEM74B    |
| ENSG00000230155 | 6.93476698  | 2.985650913 | 1.238607955  | 0.249795161 | 0.3669785   | FO393401.1 |
| ENSG00000285665 | 15.15464226 | 9.019600173 | 0.751204847  | 0.249798498 | 0.3669785   | AL031274.1 |
| ENSG00000130818 | 312.5041326 | 373.1265323 | -0.255492616 | 0.24988522  | 0.367084561 | ZNF426     |
| ENSG00000261136 | 14.92060799 | 8.500196642 | 0.80396123   | 0.24989895  | 0.367084561 | AC023908.3 |
| ENSG00000127922 | 1215.633812 | 1457.139407 | -0.261489896 | 0.249923319 | 0.367099602 | SEM1       |
| ENSG00000187288 | 3.328947419 | 8.286581446 | -1.323964541 | 0.250061805 | 0.367276496 | CIDEC      |

|                 |             |             |              |             |             |            |
|-----------------|-------------|-------------|--------------|-------------|-------------|------------|
| ENSG00000129219 | 749.3819871 | 575.6529539 | 0.381049156  | 0.250072022 | 0.367276496 | PLD2       |
| novel.924       | 62.42600878 | 156.4953058 | -1.325672329 | 0.250193028 | 0.367415357 | -          |
| ENSG00000114019 | 2880.582024 | 3765.236259 | -0.386429749 | 0.250194854 | 0.367415357 | AMOTL2     |
| ENSG00000184497 | 160.7272941 | 110.5121757 | 0.542399688  | 0.250263235 | 0.367495004 | TMEM255B   |
| ENSG00000213983 | 311.9963464 | 256.8319302 | 0.280361946  | 0.250364855 | 0.367623449 | AP1G2      |
| ENSG00000285331 | 36.71684765 | 23.12651568 | 0.660036069  | 0.250453339 | 0.367732503 | AC090517.5 |
| ENSG00000267065 | 5.055655094 | 1.161661783 | 2.159264106  | 0.250467433 | 0.367732503 | LINC02080  |
| ENSG00000124343 | 1.511549406 | 5.158006716 | -1.778662025 | 0.25058276  | 0.367881036 | XG         |
| ENSG00000213160 | 88.38661342 | 120.6287009 | -0.450715896 | 0.250665802 | 0.367982156 | KLHL23     |
| novel.864       | 60.60821202 | 119.3231219 | -0.978027998 | 0.250860755 | 0.368247543 | -          |
| ENSG00000129315 | 586.3609498 | 704.8041032 | -0.265291832 | 0.250927862 | 0.368325242 | CCNT1      |
| ENSG00000155269 | 0.307102255 | 2.435565801 | -2.909043506 | 0.250957689 | 0.368348212 | GPR78      |
| ENSG00000180440 | 2.463086283 | 0           | 3.632815968  | 0.250984009 | 1           | SERTM1     |
| ENSG00000230725 | 2.463086283 | 0           | 3.632815968  | 0.250984009 | 1           | AL035252.2 |
| ENSG00000242534 | 2.463086283 | 0           | 3.632815968  | 0.250984009 | 1           | IGKV2D-28  |
| ENSG00000236469 | 2.463086283 | 0           | 3.632815968  | 0.250984009 | 1           | AC007881.2 |
| ENSG00000189152 | 2.463086283 | 0           | 3.632815968  | 0.250984009 | 1           | GRAPL      |
| ENSG00000198598 | 1061.288642 | 682.8986616 | 0.63643086   | 0.251090596 | 0.368522471 | MMP17      |
| ENSG00000256258 | 2.460578986 | 0           | 3.631431984  | 0.251250342 | 1           | AC117500.3 |
| ENSG00000241186 | 2.460578986 | 0           | 3.631431984  | 0.251250342 | 1           | TDGF1      |
| ENSG00000211801 | 2.460578986 | 0           | 3.631431984  | 0.251250342 | 1           | TRAV21     |
| ENSG00000163081 | 2.460578986 | 0           | 3.631431984  | 0.251250342 | 1           | CCDC140    |
| ENSG00000249459 | 29.4900222  | 41.8822145  | -0.505830617 | 0.25129014  | 0.368794505 | ZNF286B    |
| ENSG00000214338 | 1.774560141 | 5.73646166  | -1.683162103 | 0.251427026 | 0.36896979  | SOGA3      |
| ENSG00000287165 | 3.636049674 | 1.10029862  | 1.738976029  | 0.251457449 | 0.36896979  | AL078621.4 |
| ENSG00000105655 | 693.5152448 | 539.2977551 | 0.362551136  | 0.251464248 | 0.36896979  | ISYNA1     |
| ENSG00000274598 | 0.586481695 | 3.983292303 | -2.748223695 | 0.251466382 | 0.36896979  | AC087893.1 |
| ENSG00000196372 | 310.5911287 | 391.0367134 | -0.332137036 | 0.25197128  | 0.369689734 | ASB13      |
| ENSG00000224609 | 11.5274394  | 6.175588807 | 0.906105962  | 0.252166725 | 0.369954178 | AC093425.1 |
| ENSG00000229320 | 114.2484638 | 87.21556911 | 0.387246097  | 0.252179997 | 0.369954178 | KRT8P12    |
| ENSG00000168397 | 1180.962501 | 1390.634715 | -0.235621292 | 0.25225931  | 0.370047402 | ATG4B      |
| novel.811       | 10.01456507 | 16.41834232 | -0.716179041 | 0.252272029 | 0.370047402 | -          |
| ENSG00000231829 | 3.082305388 | 0.387220594 | 2.994110046  | 0.252307068 | 0.370077906 | AL157834.1 |
| ENSG00000085449 | 932.7614099 | 1102.48597  | -0.241356616 | 0.252343675 | 0.370110705 | WDFY1      |
| ENSG00000253180 | 5.39424111  | 2.129777466 | 1.336432224  | 0.252358737 | 0.370111902 | AC104986.1 |
| ENSG00000188672 | 11.65434336 | 20.69783795 | -0.822314873 | 0.252378087 | 0.370119388 | RHCE       |
| ENSG00000140463 | 465.699821  | 362.5631525 | 0.360301446  | 0.252409524 | 0.370144597 | BBS4       |
| ENSG00000274183 | 0           | 2.221822211 | -3.729559012 | 0.252410256 | 1           | H2AFB1     |
| ENSG00000223586 | 0           | 2.221822211 | -3.729559012 | 0.252410256 | 1           | LINC01312  |
| ENSG00000163736 | 4.903535618 | 1.069617038 | 2.191127679  | 0.252506151 | 0.370265397 | PPBP       |
| ENSG00000189144 | 37.43900884 | 26.36232396 | 0.509128182  | 0.252536275 | 0.370288672 | ZNF573     |
| ENSG00000117507 | 2.15473038  | 8.512093397 | -1.991097734 | 0.252569911 | 0.370317091 | FMO6P      |
| ENSG00000126777 | 3110.167178 | 3633.202284 | -0.224255785 | 0.252752681 | 0.370564156 | KTN1       |
| ENSG00000153767 | 194.1534449 | 238.1716154 | -0.29576521  | 0.252791306 | 0.370599871 | GTF2E1     |
| ENSG00000272333 | 986.3124266 | 1239.316162 | -0.32918392  | 0.252839961 | 0.370650286 | KMT2B      |
| ENSG00000287731 | 0.308355904 | 2.415496705 | -2.898469743 | 0.252885288 | 0.370695817 | AL035603.1 |
| ENSG00000241973 | 1354.178118 | 1693.76657  | -0.322613647 | 0.25290543  | 0.370704428 | PI4KA      |
| ENSG00000107872 | 457.5088791 | 363.5518855 | 0.331705562  | 0.252959096 | 0.370762172 | FBXL15     |
| ENSG00000287986 | 2.139615324 | 0.336469917 | 2.4670536    | 0.25300228  | 1           | AL135841.1 |
| ENSG00000273367 | 4.398612713 | 0.336469917 | 3.51058082   | 0.253047794 | 0.370871255 | AL355472.3 |
| ENSG00000224040 | 1.233423615 | 4.657388011 | -1.925573993 | 0.253140407 | 0.370986062 | HMG1P4     |

|                 |             |             |              |             |             |            |
|-----------------|-------------|-------------|--------------|-------------|-------------|------------|
| ENSG00000165629 | 2495.758074 | 2894.167123 | -0.213728796 | 0.25317117  | 0.371010218 | ATP5F1C    |
| ENSG00000218631 | 3.636049674 | 1.110911105 | 1.732883495  | 0.253290848 | 0.371164666 | AL117344.1 |
| ENSG00000127993 | 303.2737276 | 253.8998556 | 0.256997888  | 0.253308346 | 0.371169372 | RBM48      |
| ENSG00000229951 | 5.292196663 | 15.25539627 | -1.520933036 | 0.253369024 | 0.371237345 | AC104695.2 |
| ENSG00000158301 | 151.63281   | 215.240478  | -0.505342396 | 0.253493422 | 0.371398669 | GPRASP2    |
| ENSG00000153822 | 0.293240848 | 2.415496705 | -2.898447774 | 0.253534262 | 0.371437559 | KCNJ16     |
| ENSG00000281649 | 1205.277973 | 960.089018  | 0.328438186  | 0.253617957 | 0.371539224 | EBLN3P     |
| ENSG00000148408 | 6.094121362 | 2.200597239 | 1.478887074  | 0.253673251 | 0.371578727 | CACNA1B    |
| ENSG00000198774 | 56.58028129 | 19.8564298  | 1.507423305  | 0.253673526 | 0.371578727 | RASSF9     |
| ENSG00000138798 | 3.3831394   | 8.775303396 | -1.384434831 | 0.253700132 | 0.371590893 | EGF        |
| ENSG00000104518 | 65.11338523 | 112.1572253 | -0.786274837 | 0.253710436 | 0.371590893 | GSDMD      |
| ENSG00000163714 | 2395.821765 | 1905.536275 | 0.330342289  | 0.25373982  | 0.371612979 | U2SURP     |
| ENSG00000204604 | 182.1162815 | 138.2782405 | 0.39549856   | 0.253809953 | 0.37169474  | ZNF468     |
| ENSG00000139428 | 443.7935884 | 340.5522998 | 0.381269088  | 0.253885854 | 0.371774902 | MMAB       |
| ENSG00000253305 | 26.12332277 | 37.42196861 | -0.518831319 | 0.25389331  | 0.371774902 | PCDHGB6    |
| ENSG00000236409 | 6.893182758 | 2.853467977 | 1.271525732  | 0.2539166   | 0.371788051 | NRADDP     |
| ENSG00000172062 | 2.388764651 | 6.73513053  | -1.48107822  | 0.253971936 | 0.371848118 | SMN1       |
| ENSG00000274849 | 0.909952655 | 4.117915384 | -2.186570331 | 0.254004346 | 0.371874615 | AC023043.4 |
| ENSG00000249965 | 2.111892509 | 0.387220594 | 2.45131566   | 0.25405632  | 1           | CDC42P4    |
| ENSG00000157343 | 15.48814241 | 26.72489914 | -0.791246128 | 0.254252037 | 0.372185339 | ARMC12     |
| ENSG00000203772 | 16.40694188 | 25.31277602 | -0.624660316 | 0.254256922 | 0.372185339 | SPRN       |
| ENSG00000171148 | 1771.648097 | 1525.592586 | 0.215801498  | 0.254262255 | 0.372185339 | TADA3      |
| ENSG00000111678 | 631.0090307 | 495.5772149 | 0.348508514  | 0.254273883 | 0.372185339 | C12orf57   |
| ENSG00000213185 | 33.82817469 | 49.00371372 | -0.537702224 | 0.25434637  | 0.372259938 | FAM24B     |
| ENSG00000174225 | 3.88645265  | 1.049547942 | 1.874629832  | 0.254353505 | 0.372259938 | ARL13A     |
| ENSG00000074356 | 1371.59867  | 1095.950315 | 0.323840939  | 0.254416028 | 0.37231315  | NCBP3      |
| novel.126       | 10.06875705 | 4.698682079 | 1.101460601  | 0.254418524 | 0.37231315  | -          |
| ENSG00000249936 | 56.60234912 | 74.06260796 | -0.38978235  | 0.254446046 | 0.372332454 | RAC1P2     |
| ENSG00000129355 | 214.1857669 | 264.1357211 | -0.3021438   | 0.254494645 | 0.372353257 | CDKN2D     |
| ENSG00000286945 | 4.105371866 | 0           | 4.372244375  | 0.254503258 | 0.372353257 | AL513478.4 |
| ENSG00000169836 | 4.105371866 | 0           | 4.372244375  | 0.254503258 | 0.372353257 | TACR3      |
| ENSG00000141337 | 262.9932576 | 365.3012705 | -0.473248072 | 0.254625249 | 0.372491476 | ARSG       |
| novel.705       | 4.882081047 | 9.743290684 | -0.998554374 | 0.254626405 | 0.372491476 | -          |
| ENSG00000119392 | 453.2502481 | 551.4366358 | -0.283338485 | 0.25478698  | 0.372705395 | GLE1       |
| ENSG00000236833 | 6.912130031 | 1.682349583 | 2.015620713  | 0.254803607 | 0.372708733 | AC024560.1 |
| ENSG00000273289 | 5.156445892 | 1.702418679 | 1.568290385  | 0.254893066 | 0.372818598 | AL121672.3 |
| ENSG00000180263 | 358.547315  | 206.7825214 | 0.793793808  | 0.254909332 | 0.372821401 | FGD6       |
| ENSG00000141577 | 414.3519325 | 526.8054047 | -0.346220884 | 0.255054901 | 0.372999542 | CEP131     |
| ENSG00000201916 | 0           | 2.200597239 | -3.716960175 | 0.255060623 | 1           | RF00019    |
| ENSG00000279372 | 0           | 2.200597239 | -3.716960175 | 0.255060623 | 1           | AC137723.1 |
| ENSG00000248416 | 0           | 2.200597239 | -3.716960175 | 0.255060623 | 1           | AC107464.2 |
| ENSG00000254814 | 0           | 2.200597239 | -3.716960175 | 0.255060623 | 1           | AP003031.1 |
| ENSG00000254710 | 0           | 2.200597239 | -3.716960175 | 0.255060623 | 1           | AP001970.1 |
| ENSG00000236456 | 0           | 2.200597239 | -3.716960175 | 0.255060623 | 1           | AL035458.1 |
| ENSG00000268970 | 33.39005152 | 20.96104795 | 0.679491164  | 0.255063231 | 0.372999542 | AC022150.2 |
| ENSG00000239523 | 32.52411912 | 20.61653409 | 0.655669189  | 0.255074203 | 0.372999542 | MYLK-AS1   |
| ENSG00000247675 | 3.605819561 | 7.775350256 | -1.110077189 | 0.255174866 | 0.373125742 | LRP4-AS1   |
| ENSG00000230637 | 2.991615051 | 0.743759607 | 2.036784026  | 0.255264751 | 0.373236169 | AL022324.1 |
| ENSG00000282890 | 2.76893489  | 0.336469917 | 2.83923161   | 0.255280114 | 0.373237627 | AC009975.1 |
| ENSG00000217950 | 0.308355904 | 2.455634897 | -2.919428046 | 0.255389686 | 0.373376818 | NOC2LP2    |
| ENSG00000258580 | 2.406387005 | 0           | 3.601126285  | 0.255406239 | 1           | AL136298.1 |

|                 |             |             |              |             |             |            |
|-----------------|-------------|-------------|--------------|-------------|-------------|------------|
| ENSG00000280409 | 2.406387005 | 0           | 3.601126285  | 0.255406239 | 1           | LINC01101  |
| ENSG00000287972 | 2.406387005 | 0           | 3.601126285  | 0.255406239 | 1           | AC073648.7 |
| ENSG00000138622 | 2.406387005 | 0           | 3.601126285  | 0.255406239 | 1           | HCN4       |
| ENSG00000275576 | 0           | 2.171071533 | -3.698528734 | 0.255421145 | 1           | AL049539.1 |
| ENSG00000279034 | 0           | 2.171071533 | -3.698528734 | 0.255421145 | 1           | AC011266.1 |
| ENSG00000267439 | 0           | 2.171071533 | -3.698528734 | 0.255421145 | 1           | AD000671.3 |
| novel.839       | 0           | 2.171071533 | -3.698528734 | 0.255421145 | 1           | -          |
| ENSG00000159650 | 2.421502061 | 0           | 3.609633088  | 0.255468772 | 1           | UROC1      |
| ENSG00000260510 | 2.421502061 | 0           | 3.609633088  | 0.255468772 | 1           | AC004381.1 |
| ENSG00000258273 | 3.297463658 | 0.774441189 | 2.142204527  | 0.255575477 | 0.373627418 | AC024257.2 |
| ENSG00000260608 | 7.486003968 | 2.557136252 | 1.557942939  | 0.255614406 | 0.373663302 | AC024270.4 |
| ENSG00000230626 | 7.255730642 | 12.76907979 | -0.808872025 | 0.255636081 | 0.373673962 | AC011005.1 |
| ENSG00000228318 | 1.817398012 | 4.586568238 | -1.342417103 | 0.255816338 | 0.373916415 | AP001610.1 |
| ENSG00000233351 | 2.140868972 | 0.387220594 | 2.467796429  | 0.255864887 | 1           | AL356124.2 |
| ENSG00000204969 | 4.601447958 | 1.069617038 | 2.098795698  | 0.255945954 | 0.374084824 | PCDHA2     |
| ENSG00000229379 | 2.40137241  | 0           | 3.598301184  | 0.255958875 | 1           | AC006041.1 |
| ENSG00000202399 | 2.40137241  | 0           | 3.598301184  | 0.255958875 | 1           | RF00019    |
| ENSG00000172139 | 2.40137241  | 0           | 3.598301184  | 0.255958875 | 1           | SLC9C1     |
| ENSG00000151239 | 1731.34536  | 2042.78171  | -0.238780814 | 0.256018786 | 0.374170224 | TWF1       |
| ENSG00000137804 | 3.928036872 | 8.060941101 | -1.028583412 | 0.256114759 | 0.374289434 | NUSAP1     |
| ENSG00000269534 | 1.49643435  | 4.941951375 | -1.722064628 | 0.256136373 | 0.374299967 | AC011466.3 |
| ENSG00000287688 | 2.138361675 | 0.387220594 | 2.466384259  | 0.256136479 | 1           | AC011317.1 |
| ENSG00000149654 | 2.138361675 | 0.387220594 | 2.466384259  | 0.256136479 | 1           | CDH22      |
| novel.9         | 2.415233817 | 0           | 3.606118451  | 0.256154481 | 1           | -          |
| novel.301       | 2.415233817 | 0           | 3.606118451  | 0.256154481 | 1           | -          |
| ENSG00000162897 | 2.415233817 | 0           | 3.606118451  | 0.256154481 | 1           | FCAMR      |
| ENSG00000219607 | 47.86153824 | 31.98641499 | 0.587214514  | 0.256199944 | 0.374371808 | PPP1R3G    |
| ENSG00000185499 | 56.48630072 | 93.83675359 | -0.733885264 | 0.25629585  | 0.374490889 | MUC1       |
| ENSG00000107874 | 2182.884139 | 1721.398916 | 0.342648244  | 0.256393838 | 0.374612997 | CUEDC2     |
| ENSG00000261790 | 17.62879792 | 9.293551051 | 0.924318749  | 0.256499138 | 0.374745774 | AC005606.2 |
| ENSG00000127580 | 235.243405  | 286.4779538 | -0.284052993 | 0.256564925 | 0.374820811 | WDR24      |
| ENSG00000006652 | 1059.306959 | 854.1199247 | 0.310503756  | 0.2566012   | 0.374821484 | IFRD1      |
| ENSG00000147439 | 301.2525689 | 385.0283086 | -0.35314729  | 0.256606959 | 0.374821484 | BIN3       |
| ENSG00000235174 | 884.5974106 | 1108.589293 | -0.325686733 | 0.256617944 | 0.374821484 | RPL39P3    |
| ENSG00000269821 | 235.1469735 | 157.6111912 | 0.577080527  | 0.256623092 | 0.374821484 | KCNQ1OT1   |
| ENSG00000279484 | 0.601596751 | 3.168712922 | -2.397346609 | 0.256648849 | 0.374838031 | KLHL30-AS1 |
| novel.271       | 3.076037145 | 11.10821197 | -1.858427103 | 0.256673679 | 0.374853224 | -          |
| ENSG00000136002 | 158.6785402 | 111.1029598 | 0.514484018  | 0.256759092 | 0.374956886 | ARHGEF4    |
| ENSG00000277311 | 2.464339932 | 0           | 3.633545673  | 0.256765916 | 1           | RF02247    |
| ENSG00000174450 | 2.464339932 | 0           | 3.633545673  | 0.256765916 | 1           | GOLGA6L2   |
| ENSG00000268869 | 2.464339932 | 0           | 3.633545673  | 0.256765916 | 1           | ESPNP      |
| ENSG00000260719 | 2.464339932 | 0           | 3.633545673  | 0.256765916 | 1           | AC009133.3 |
| ENSG00000256577 | 2.464339932 | 0           | 3.633545673  | 0.256765916 | 1           | AC007406.4 |
| ENSG00000188393 | 2.464339932 | 0           | 3.633545673  | 0.256765916 | 1           | CLEC2A     |
| ENSG00000197442 | 646.4212856 | 552.1554461 | 0.22703523   | 0.256862932 | 0.375087445 | MAP3K5     |
| ENSG00000265490 | 1.466204238 | 5.482579877 | -1.886988116 | 0.256901895 | 0.375111945 | AP001178.2 |
| ENSG00000236393 | 2.766427592 | 8.213193133 | -1.568822552 | 0.256938365 | 0.375111945 | AC091806.1 |
| ENSG00000257354 | 277.7272012 | 184.1309046 | 0.593741783  | 0.256940125 | 0.375111945 | AC048341.1 |
| ENSG00000196821 | 1525.41236  | 1903.395604 | -0.319297086 | 0.256950255 | 0.375111945 | ILRUN      |
| ENSG00000077092 | 531.6614602 | 441.527946  | 0.267796557  | 0.256951899 | 0.375111945 | RARB       |
| ENSG00000176871 | 1466.406743 | 1161.255544 | 0.336334875  | 0.256993943 | 0.375142712 | WSB2       |

|                 |             |             |              |             |             |            |
|-----------------|-------------|-------------|--------------|-------------|-------------|------------|
| ENSG00000244738 | 3.931797819 | 1.10029862  | 1.850417482  | 0.257001852 | 0.375142712 | AC026316.3 |
| ENSG00000255326 | 6.022307028 | 2.537067156 | 1.25428772   | 0.257025256 | 0.375155797 | AP001922.5 |
| ENSG00000280744 | 0           | 2.292641984 | -3.772271054 | 0.257044293 | 1           | LINC01173  |
| ENSG00000132693 | 0           | 2.292641984 | -3.772271054 | 0.257044293 | 1           | CRP        |
| ENSG00000227432 | 0           | 2.292641984 | -3.772271054 | 0.257044293 | 1           | AC053503.1 |
| ENSG00000243572 | 0           | 2.292641984 | -3.772271054 | 0.257044293 | 1           | LINC02017  |
| ENSG00000286988 | 0           | 2.292641984 | -3.772271054 | 0.257044293 | 1           | AC024933.2 |
| ENSG00000276176 | 0           | 2.292641984 | -3.772271054 | 0.257044293 | 1           | MIR6090    |
| ENSG00000268889 | 0           | 2.292641984 | -3.772271054 | 0.257044293 | 1           | AC008750.7 |
| ENSG00000197111 | 3440.013119 | 3000.459368 | 0.197222206  | 0.257200158 | 0.375389996 | PCBP2      |
| ENSG00000158089 | 12.41217653 | 23.98670866 | -0.944679898 | 0.257223421 | 0.375402859 | GALNT14    |
| ENSG00000236662 | 2.138361675 | 0.356539013 | 2.466397364  | 0.257293316 | 1           | AL133215.1 |
| ENSG00000198502 | 2.459325337 | 0           | 3.630772964  | 0.257300647 | 1           | HLA-DRB5   |
| ENSG00000187621 | 2.459325337 | 0           | 3.630772964  | 0.257300647 | 1           | TCL6       |
| ENSG00000285876 | 2.459325337 | 0           | 3.630772964  | 0.257300647 | 1           | AC093912.1 |
| ENSG00000125084 | 2.459325337 | 0           | 3.630772964  | 0.257300647 | 1           | WNT1       |
| ENSG00000250921 | 2.459325337 | 0           | 3.630772964  | 0.257300647 | 1           | LINC02063  |
| ENSG00000241657 | 2.459325337 | 0           | 3.630772964  | 0.257300647 | 1           | TRBV11-2   |
| ENSG00000238363 | 1.480065645 | 6.22749536  | -2.062880784 | 0.257316151 | 0.375517099 | SNORA13    |
| ENSG00000134480 | 452.4604333 | 533.9020829 | -0.239068292 | 0.25741972  | 0.375640373 | CCNH       |
| ENSG00000181690 | 367.0876327 | 256.9708728 | 0.514837632  | 0.257429539 | 0.375640373 | PLAG1      |
| ENSG00000224677 | 1.7871679   | 5.064677702 | -1.492128356 | 0.257505627 | 0.375730298 | PDIA3P2    |
| ENSG00000241907 | 0.586481695 | 3.749479616 | -2.65577447  | 0.257565937 | 0.375764074 | RPS20P4    |
| ENSG00000255921 | 0.586481695 | 3.749479616 | -2.65577447  | 0.257565937 | 0.375764074 | AC026310.2 |
| ENSG00000207751 | 1.541779519 | 5.696323468 | -1.893732967 | 0.257572164 | 0.375764074 | AP000553.1 |
| ENSG00000261240 | 1.215801261 | 3.566546002 | -1.557913466 | 0.25758764  | 0.375765551 | AC009065.6 |
| ENSG00000269794 | 1.214547612 | 4.004517274 | -1.71903754  | 0.257623986 | 0.375797473 | AC010642.1 |
| ENSG00000233087 | 4.585079253 | 1.406086955 | 1.690330517  | 0.257656349 | 0.37582358  | RAB6D      |
| ENSG00000164542 | 83.28894717 | 56.5459748  | 0.561807023  | 0.257694028 | 0.375857437 | KIAA0895   |
| ENSG00000214018 | 2.140868972 | 0.336469917 | 2.467821036  | 0.257784557 | 1           | RRM2P3     |
| ENSG00000260394 | 3.594465451 | 0.743759607 | 2.295240076  | 0.257922297 | 0.376169261 | Z92544.1   |
| ENSG00000113722 | 5.841211088 | 1.00940975  | 2.506821023  | 0.25800028  | 0.376261873 | CDX1       |
| ENSG00000138411 | 79.86415228 | 118.8745384 | -0.571975231 | 0.258028858 | 0.376268458 | HECW2      |
| ENSG00000286331 | 1.789675198 | 5.064677702 | -1.490870282 | 0.25803376  | 0.376268458 | AC011388.1 |
| ENSG00000168955 | 1.218308559 | 4.22887335  | -1.803029089 | 0.258097751 | 0.37633309  | TM4SF20    |
| ENSG00000171262 | 724.3090956 | 910.2746502 | -0.329962384 | 0.258107052 | 0.37633309  | FAM98B     |
| ENSG00000179168 | 17.70938779 | 27.89113725 | -0.650518458 | 0.258224727 | 0.376483537 | GGN        |
| ENSG00000246863 | 0.894837599 | 3.230076085 | -1.842564414 | 0.25829128  | 0.376559438 | AC012377.1 |
| ENSG00000186399 | 3.588197208 | 0.743759607 | 2.293009001  | 0.258351667 | 0.376626341 | GOLGA8R    |
| ENSG00000110315 | 1518.342068 | 1107.947046 | 0.454379969  | 0.258510036 | 0.376836069 | RNF141     |
| ENSG00000196743 | 1968.85289  | 1538.114411 | 0.356405077  | 0.258524871 | 0.376836551 | GM2A       |
| ENSG00000178723 | 2.391271949 | 0           | 3.592562984  | 0.258805753 | 1           | GLULP4     |
| ENSG00000279430 | 2.391271949 | 0           | 3.592562984  | 0.258805753 | 1           | AL590560.3 |
| ENSG00000285750 | 2.391271949 | 0           | 3.592562984  | 0.258805753 | 1           | AL157385.2 |
| ENSG00000231401 | 2.391271949 | 0           | 3.592562984  | 0.258805753 | 1           | AC023481.1 |
| ENSG00000262119 | 2.391271949 | 0           | 3.592562984  | 0.258805753 | 1           | AL079343.1 |
| ENSG00000182854 | 2.391271949 | 0           | 3.592562984  | 0.258805753 | 1           | OR4F15     |
| ENSG00000249489 | 2.391271949 | 0           | 3.592562984  | 0.258805753 | 1           | GAPDHP70   |
| ENSG00000166228 | 482.8750518 | 629.1443283 | -0.382184769 | 0.25880581  | 0.377224027 | PCBD1      |
| ENSG00000162630 | 338.513599  | 82.43387935 | 2.037468043  | 0.258819734 | 0.377224027 | B3GALT2    |
| ENSG00000286216 | 12.39072196 | 5.971430221 | 1.044653285  | 0.258867868 | 0.377273018 | AC104335.1 |

|                 |             |             |              |             |             |              |
|-----------------|-------------|-------------|--------------|-------------|-------------|--------------|
| ENSG00000251259 | 23.68287344 | 14.70518276 | 0.695827225  | 0.258945629 | 0.377362455 | AC004069.1   |
| ENSG00000157315 | 14.45100106 | 8.225089889 | 0.813120611  | 0.258958285 | 0.377362455 | TMED6        |
| ENSG00000244050 | 2.123246619 | 0.356539013 | 2.45779084   | 0.258961217 | 1           | DEFB109F     |
| ENSG00000151475 | 2.123246619 | 0.356539013 | 2.45779084   | 0.258961217 | 1           | SLC25A31     |
| ENSG00000138398 | 1254.408433 | 1089.258627 | 0.20359385   | 0.258991249 | 0.377380134 | PPIG         |
| ENSG00000215644 | 7.092185785 | 1.049547942 | 2.747053739  | 0.258999468 | 0.377380134 | GCGR         |
| ENSG00000285130 | 16.01165658 | 9.620564358 | 0.732012067  | 0.25920051  | 0.377651887 | AL358113.1   |
| ENSG00000228600 | 2.387511003 | 0           | 3.590431755  | 0.259224995 | 1           | POLR2CP1     |
| ENSG00000286715 | 2.387511003 | 0           | 3.590431755  | 0.259224995 | 1           | AL589863.2   |
| ENSG00000226235 | 2.387511003 | 0           | 3.590431755  | 0.259224995 | 1           | LEMD1-AS1    |
| ENSG00000288026 | 2.387511003 | 0           | 3.590431755  | 0.259224995 | 1           | AC096996.3   |
| ENSG00000265737 | 2.387511003 | 0           | 3.590431755  | 0.259224995 | 1           | AP006565.1   |
| ENSG00000275392 | 2.387511003 | 0           | 3.590431755  | 0.259224995 | 1           | AL445493.3   |
| ENSG00000204779 | 2.387511003 | 0           | 3.590431755  | 0.259224995 | 1           | FOXD4L5      |
| ENSG00000255974 | 3.254625787 | 0.743759607 | 2.157104197  | 0.259288864 | 0.377754617 | CYP2A6       |
| ENSG00000125351 | 351.2297175 | 285.6733786 | 0.298077847  | 0.259300097 | 0.377754617 | UPF3B        |
| ENSG00000188828 | 2.127007565 | 0.336469917 | 2.459923107  | 0.259319866 | 1           | GLRA4        |
| ENSG00000152443 | 245.7819115 | 198.1958497 | 0.309675299  | 0.259420037 | 0.377908157 | ZNF776       |
| ENSG00000197535 | 1230.226881 | 956.0699067 | 0.363969297  | 0.259496877 | 0.377998899 | MYO5A        |
| ENSG00000185607 | 4.469173399 | 1.00940975  | 2.115472923  | 0.259615964 | 0.378151167 | ACTBP7       |
| ENSG00000116584 | 1658.617369 | 1986.315495 | -0.260032564 | 0.259647568 | 0.378175999 | ARHGEF2      |
| ENSG00000160447 | 136.6877141 | 184.0466127 | -0.429022143 | 0.259685943 | 0.378210689 | PKN3         |
| ENSG00000101307 | 45.77256706 | 16.33202977 | 1.488875485  | 0.259718758 | 0.378237278 | SIRPB1       |
| novel.195       | 2.436617117 | 0           | 3.618110733  | 0.259747659 | 1           | -            |
| ENSG00000279952 | 2.436617117 | 0           | 3.618110733  | 0.259747659 | 1           | AC068787.1   |
| ENSG00000216360 | 2.436617117 | 0           | 3.618110733  | 0.259747659 | 1           | AL136968.1   |
| ENSG00000253618 | 2.708474665 | 0.356539013 | 2.810213216  | 0.259937371 | 0.378534434 | GRPEL2-AS1   |
| ENSG00000167281 | 7.507387268 | 3.280826763 | 1.203899545  | 0.259965586 | 0.378554304 | RBFOX3       |
| ENSG00000265625 | 2.694613258 | 0.387220594 | 2.803498889  | 0.260066884 | 0.378680587 | AC104564.5   |
| ENSG00000226964 | 282.8974494 | 341.5637514 | -0.272656224 | 0.26010516  | 0.378715095 | RHEBP2       |
| ENSG00000174564 | 26.32573074 | 15.1941615  | 0.788525133  | 0.260129453 | 0.378718021 | IL20RB       |
| ENSG00000227321 | 3.299970955 | 0.713078025 | 2.206594659  | 0.260136323 | 0.378718021 | MTND4P15     |
| ENSG00000205726 | 1547.673479 | 1233.952703 | 0.3265501    | 0.260198847 | 0.378787821 | ITSN1        |
| ENSG00000185798 | 136.3813239 | 171.3291827 | -0.32909423  | 0.260216202 | 0.378789969 | WDR53        |
| ENSG00000163491 | 13.546063   | 21.59641813 | -0.674795866 | 0.260229481 | 0.378789969 | NEK10        |
| ENSG00000207741 | 3.857476187 | 10.15888111 | -1.38968614  | 0.260417259 | 0.379042061 | MIR590       |
| ENSG00000182950 | 10.8426742  | 5.748230021 | 0.91775328   | 0.260446417 | 0.379063266 | ODF3L1       |
| ENSG00000149313 | 700.814898  | 880.8114447 | -0.330147784 | 0.260492223 | 0.379108697 | AASDHPPT     |
| ENSG00000105427 | 12.99231871 | 6.307900138 | 1.033457233  | 0.260526226 | 0.379136945 | CNFN         |
| ENSG00000267784 | 2.429095225 | 0           | 3.613907945  | 0.260564704 | 1           | AC010680.1   |
| ENSG00000277504 | 2.429095225 | 0           | 3.613907945  | 0.260564704 | 1           | AC010536.3   |
| ENSG00000233235 | 2.429095225 | 0           | 3.613907945  | 0.260564704 | 1           | BX119321.1   |
| ENSG00000276203 | 2.429095225 | 0           | 3.613907945  | 0.260564704 | 1           | ANKRD20A3    |
| ENSG00000239322 | 2.729857965 | 0.387220594 | 2.820519991  | 0.260576917 | 0.379189474 | ATP6V1B1-AS1 |
| ENSG00000273784 | 5.379126054 | 2.160459047 | 1.321882873  | 0.260639414 | 0.379259177 | AL137058.2   |
| ENSG00000253414 | 11.65204952 | 4.545274171 | 1.348388719  | 0.260668627 | 0.379280444 | AC124067.2   |
| ENSG00000135506 | 3713.08614  | 4424.496342 | -0.252860535 | 0.260688466 | 0.379288068 | OS9          |
| ENSG00000231645 | 2.699627853 | 0.356539013 | 2.805914264  | 0.26073966  | 0.37934131  | KRT17P6      |
| ENSG00000134056 | 229.0242306 | 321.7138245 | -0.490575648 | 0.260831328 | 0.379445348 | MRPS36       |
| ENSG00000165887 | 7.031725561 | 17.8632832  | -1.345381651 | 0.26084038  | 0.379445348 | ANKRD2       |
| ENSG00000156222 | 2.095523804 | 0.387220594 | 2.441924935  | 0.26086839  | 1           | SLC28A1      |

|                 |             |             |              |             |             |            |
|-----------------|-------------|-------------|--------------|-------------|-------------|------------|
| ENSG00000188624 | 2.095523804 | 0.387220594 | 2.441924935  | 0.26086839  | 1           | IGFL3      |
| ENSG00000242953 | 3.373038938 | 0.713078025 | 2.234442297  | 0.26101318  | 0.379675463 | AC139453.1 |
| ENSG00000277051 | 3.018084217 | 0.672939833 | 2.120100461  | 0.261183043 | 0.379890926 | RF00017    |
| ENSG00000286376 | 2.694613258 | 0.356539013 | 2.803490255  | 0.261194134 | 0.379890926 | AC006041.2 |
| ENSG00000257509 | 12.85126861 | 6.23695197  | 1.053506632  | 0.261220682 | 0.379890926 | AC073487.1 |
| ENSG00000264266 | 2.710981963 | 0.693008929 | 1.940647227  | 0.261224983 | 0.379890926 | MIR4322    |
| ENSG00000235558 | 7.0002418   | 2.038888596 | 1.757672493  | 0.261236656 | 0.379890926 | AC146949.1 |
| ENSG00000153060 | 2.722336072 | 0.387220594 | 2.816908329  | 0.261249035 | 0.379890926 | TEKT5      |
| ENSG00000278420 | 2.415233817 | 6.836760279 | -1.499785063 | 0.261295514 | 0.379937248 | MIR6819    |
| ENSG00000242950 | 14.00277743 | 4.665688746 | 1.586131049  | 0.261420491 | 0.380087109 | ERVW-1     |
| ENSG00000279196 | 10.27381486 | 4.494523493 | 1.177818472  | 0.261427837 | 0.380087109 | AC135048.4 |
| ENSG00000168509 | 2.699627853 | 0.336469917 | 2.805909586  | 0.261482371 | 0.380145123 | HJV        |
| ENSG00000261707 | 6.733541389 | 1.682349583 | 1.975864497  | 0.261594155 | 0.380275291 | AC092134.1 |
| ENSG00000250403 | 0.615458159 | 2.527610546 | -2.047605262 | 0.261603528 | 0.380275291 | AC097460.2 |
| ENSG00000176723 | 37.52622297 | 22.88923537 | 0.707784797  | 0.261615817 | 0.380275291 | ZNF843     |
| ENSG00000132773 | 217.4215879 | 293.9298524 | -0.435542607 | 0.261671033 | 0.380334272 | TOE1       |
| ENSG00000287634 | 4.008626748 | 0           | 4.336195274  | 0.261724787 | 0.380391121 | AC114277.1 |
| ENSG00000163536 | 56.83505847 | 91.71296511 | -0.692296199 | 0.261854308 | 0.380558079 | SERPINI1   |
| ENSG00000286864 | 1.526664462 | 4.62670643  | -1.606233465 | 0.261871175 | 0.380561305 | AC012076.1 |
| ENSG00000178996 | 1237.598814 | 1024.373801 | 0.273054297  | 0.261916124 | 0.380605337 | SNX18      |
| ENSG00000242622 | 46.23282933 | 33.76106611 | 0.454226244  | 0.261958383 | 0.380645455 | AC092910.3 |
| ENSG00000282826 | 232.7812883 | 325.2281728 | -0.482660707 | 0.261976953 | 0.380651151 | FRG1CP     |
| ENSG00000171189 | 18.03035146 | 10.67956891 | 0.753766715  | 0.262054996 | 0.380743253 | GRIK1      |
| ENSG00000285747 | 2.095523804 | 0.356539013 | 2.441907658  | 0.26206323  | 1           | AL133485.2 |
| ENSG00000140400 | 2216.999801 | 1662.706699 | 0.415178125  | 0.262080445 | 0.380758936 | MAN2C1     |
| ENSG00000231927 | 0.921306765 | 4.159209451 | -2.186428591 | 0.26213215  | 0.380800833 | AC093734.1 |
| ENSG00000273451 | 2.052685933 | 7.357319686 | -1.828886515 | 0.262138597 | 0.380800833 | AL031666.3 |
| ENSG00000198542 | 198.606123  | 409.8090043 | -1.045181998 | 0.262235935 | 0.380920933 | ITGBL1     |
| ENSG00000249602 | 5.484931447 | 2.089639274 | 1.372928604  | 0.262381611 | 0.381111234 | AL589765.4 |
| ENSG00000137198 | 52.86991033 | 85.47216033 | -0.695448778 | 0.262607797 | 0.381418447 | GMPR       |
| ENSG00000102241 | 1414.779803 | 1195.157466 | 0.243094037  | 0.262629902 | 0.381429229 | HTATSF1    |
| novel.548       | 3.992329314 | 0           | 4.33045405   | 0.262754098 | 0.381566946 | -          |
| ENSG00000260653 | 3.992329314 | 0           | 4.33045405   | 0.262754098 | 0.381566946 | AC237221.1 |
| ENSG00000257453 | 1.49643435  | 4.63616304  | -1.627467976 | 0.262844929 | 0.381660237 | AC011611.3 |
| ENSG00000197779 | 117.4657371 | 82.21477593 | 0.514028496  | 0.262847721 | 0.381660237 | ZNF81      |
| ENSG00000214359 | 2.095523804 | 0.336469917 | 2.441896291  | 0.262854973 | 1           | RPL18P10   |
| ENSG00000225185 | 2.095523804 | 0.336469917 | 2.441896291  | 0.262854973 | 1           | PPIAP8     |
| ENSG00000104343 | 591.6400245 | 506.3194181 | 0.225058213  | 0.262915062 | 0.381736684 | UBE2W      |
| ENSG00000257222 | 7.88379656  | 3.862877727 | 1.015785813  | 0.262995664 | 0.381832375 | AC079907.1 |
| ENSG00000265194 | 20.92500793 | 10.84127755 | 0.951875498  | 0.263020764 | 0.381847479 | AL359922.2 |
| ENSG00000167632 | 420.0443418 | 345.7981945 | 0.279887907  | 0.263089697 | 0.381926213 | TRAPPC9    |
| ENSG00000172890 | 1257.082678 | 1551.408468 | -0.303433032 | 0.263113908 | 0.381940018 | NADSYN1    |
| ENSG00000231966 | 3.910414519 | 1.130980201 | 1.821229454  | 0.263133618 | 0.381944687 | AL359853.2 |
| ENSG00000161671 | 3143.862062 | 2692.236657 | 0.223642576  | 0.263146526 | 0.381944687 | EMC10      |
| ENSG00000227097 | 3072.820316 | 1871.715125 | 0.715298021  | 0.263215062 | 0.382022821 | RPS28P7    |
| ENSG00000259091 | 2.157237677 | 8.592369781 | -2.001946353 | 0.263254007 | 0.382058003 | LINC00517  |
| ENSG00000122547 | 71.56328733 | 111.4543617 | -0.638513602 | 0.263269591 | 0.382059277 | EEPDP1     |
| ENSG00000105643 | 908.648247  | 713.7471299 | 0.347832668  | 0.263347064 | 0.382150362 | ARRDC2     |
| ENSG00000100938 | 39.06277443 | 54.52412004 | -0.484105929 | 0.263479897 | 0.382321765 | GMPR2      |
| ENSG00000143674 | 36.86799821 | 59.97879681 | -0.699956723 | 0.263534429 | 0.382358771 | MAP3K21    |
| novel.834       | 4.83548223  | 9.008987688 | -0.895014555 | 0.263534833 | 0.382358771 | -          |



|                 |             |             |              |             |             |            |
|-----------------|-------------|-------------|--------------|-------------|-------------|------------|
| ENSG00000212283 | 4.281737945 | 1.069617038 | 1.994841875  | 0.263608828 | 0.382444771 | SNORD89    |
| ENSG00000134548 | 25.56198533 | 36.64765581 | -0.523742343 | 0.263640183 | 0.382468904 | SPX        |
| novel.469       | 27.55421103 | 53.77595968 | -0.967258295 | 0.263669693 | 0.382490357 | -          |
| ENSG00000277662 | 3.352909287 | 8.079854321 | -1.26648577  | 0.263746639 | 0.382580617 | AL354696.1 |
| ENSG00000269191 | 4.514518568 | 9.670030766 | -1.087594802 | 0.26381238  | 0.382654613 | AC005387.2 |
| ENSG00000221540 | 1.215801261 | 3.822739535 | -1.664460126 | 0.26390141  | 0.382762381 | MIR1180    |
| ENSG00000227518 | 0.61420451  | 2.985650913 | -2.281290023 | 0.264130137 | 0.383072742 | AL928970.1 |
| ENSG00000127870 | 649.5056279 | 776.7886775 | -0.258591823 | 0.264156136 | 0.383089063 | RNF6       |
| ENSG00000165675 | 144.2030784 | 184.2495682 | -0.354080401 | 0.264217366 | 0.383156473 | ENOX2      |
| ENSG00000213236 | 1.816144364 | 4.718751175 | -1.373239577 | 0.264265799 | 0.38320532  | YWHAZP2    |
| ENSG00000256340 | 4.202401718 | 0.713078025 | 2.556525215  | 0.264297164 | 0.383229413 | ABCC6P1    |
| ENSG00000264943 | 2.947523532 | 9.882618481 | -1.737218353 | 0.264365357 | 0.3833069   | SH3GL1P2   |
| ENSG00000239739 | 1.789675198 | 6.052734086 | -1.743775744 | 0.264414804 | 0.383354281 | AC026316.2 |
| ENSG00000188176 | 5.224428009 | 1.161661783 | 2.200032309  | 0.264427546 | 0.383354281 | SMTNL2     |
| ENSG00000273542 | 0.601596751 | 3.068367442 | -2.356968349 | 0.264558475 | 0.383522694 | HIST1H4K   |
| ENSG00000108465 | 353.9435068 | 271.9069145 | 0.381263058  | 0.264593948 | 0.383552718 | CDK5RAP3   |
| ENSG00000156009 | 2.684512796 | 0.387220594 | 2.798540628  | 0.264680821 | 0.383657242 | MAGEA8     |
| ENSG00000226699 | 5.116115319 | 1.874739808 | 1.474765451  | 0.264730198 | 0.383707408 | AL360181.1 |
| ENSG00000090989 | 955.2835153 | 804.5906772 | 0.247852481  | 0.264757427 | 0.383715021 | EXOC1      |
| novel.717       | 169.8587599 | 282.0005238 | -0.732179001 | 0.264764989 | 0.383715021 | -          |
| ENSG00000279369 | 92.39294633 | 69.48305619 | 0.410099123  | 0.264808549 | 0.383756744 | AC046185.3 |
| ENSG00000172935 | 177.4599845 | 341.4184818 | -0.944349497 | 0.2648683   | 0.383821925 | MRGPRF     |
| ENSG00000271383 | 1.218308559 | 3.903015919 | -1.686525726 | 0.264917817 | 0.383861181 | NBPF19     |
| ENSG00000103723 | 44.39007326 | 23.61421015 | 0.906148593  | 0.264924939 | 0.383861181 | AP3B2      |
| ENSG00000261019 | 8.043509199 | 2.965581817 | 1.454761175  | 0.265028098 | 0.383985357 | AC010132.4 |
| ENSG00000235609 | 67.018539   | 39.77926581 | 0.756488804  | 0.265040199 | 0.383985357 | AF127577.4 |
| ENSG00000223658 | 3.939390982 | 11.28412911 | -1.523794733 | 0.265072452 | 0.384010672 | C1GALT1C1L |
| ENSG00000236474 | 0.879722543 | 3.658590747 | -2.035040904 | 0.26514478  | 0.384094035 | GCNT1P1    |
| ENSG00000264107 | 7.930395377 | 14.30734968 | -0.848004067 | 0.265320412 | 0.38430837  | AC138207.2 |
| ENSG00000270587 | 9.926382031 | 4.892356573 | 1.009388203  | 0.265322321 | 0.38430837  | AC046185.2 |
| ENSG00000140632 | 1696.182329 | 1955.736557 | -0.205521406 | 0.265469124 | 0.384498612 | GLYR1      |
| ENSG00000261118 | 15.66805597 | 24.88413297 | -0.660952504 | 0.265483261 | 0.384498612 | AC092123.1 |
| ENSG00000188042 | 309.123554  | 171.171618  | 0.852872764  | 0.265556742 | 0.384583596 | ARL4C      |
| ENSG00000165695 | 21.17311707 | 11.85312745 | 0.827913802  | 0.265680057 | 0.384712808 | AK8        |
| ENSG00000039537 | 9.250677111 | 1.069617038 | 3.109715809  | 0.265689279 | 0.384712808 | C6         |
| ENSG00000260021 | 0           | 3.484985349 | -4.378979226 | 0.265690386 | 0.384712808 | AC098934.4 |
| ENSG00000267327 | 2.766427592 | 0.387220594 | 2.838140671  | 0.265715664 | 0.384727969 | AC009271.1 |
| ENSG00000272931 | 4.237646425 | 1.365948763 | 1.601670466  | 0.265756818 | 0.384745395 | AC099568.2 |
| ENSG00000122783 | 348.9670297 | 283.1402586 | 0.300548239  | 0.265771153 | 0.384745395 | CYREN      |
| ENSG00000188175 | 2.684512796 | 0.356539013 | 2.798529469  | 0.265801744 | 0.384745395 | HEPACAM2   |
| ENSG00000258647 | 2.684512796 | 0.356539013 | 2.798529469  | 0.265801744 | 0.384745395 | LINC00930  |
| ENSG00000224406 | 2.684512796 | 0.356539013 | 2.798529469  | 0.265801744 | 0.384745395 | LINC02052  |
| ENSG00000254449 | 2.416487466 | 5.656185276 | -1.2310239   | 0.265839166 | 0.384778126 | SF3A3P2    |
| ENSG00000153064 | 43.01867631 | 16.94391041 | 1.338932659  | 0.265865272 | 0.384794475 | BANK1      |
| ENSG00000109184 | 792.4176023 | 940.4334203 | -0.246747022 | 0.265945379 | 0.384888975 | DCUN1D4    |
| ENSG00000241556 | 3.66251884  | 7.622969829 | -1.05755221  | 0.266024532 | 0.384982085 | AC018475.1 |
| ENSG00000235619 | 0.293240848 | 2.52645467  | -2.955985603 | 0.266090679 | 0.385056362 | RPL36AP33  |
| novel.681       | 16.93547064 | 26.68920888 | -0.65131617  | 0.266136048 | 0.38509661  | -          |
| ENSG00000266145 | 2.68075185  | 0.356539013 | 2.796700404  | 0.266148136 | 0.38509661  | RHOT1P1    |
| ENSG00000279483 | 32.95124418 | 48.39799764 | -0.557819925 | 0.266186465 | 0.38513062  | AC090498.1 |
| ENSG00000261188 | 35.91896863 | 49.7000147  | -0.469151211 | 0.266292806 | 0.385263024 | Z95115.1   |

|                 |             |             |              |             |             |              |
|-----------------|-------------|-------------|--------------|-------------|-------------|--------------|
| ENSG00000233860 | 4.7800366   | 1.518200796 | 1.687422422  | 0.266389234 | 0.385381072 | AC107072.2   |
| ENSG00000282876 | 2.376156893 | 0           | 3.5839117    | 0.266402865 | 1           | Z98752.4     |
| ENSG00000256377 | 3.881438055 | 9.619408483 | -1.306369019 | 0.266510848 | 0.385535542 | AC009509.1   |
| ENSG00000113621 | 1922.051258 | 1632.306436 | 0.235588138  | 0.266544962 | 0.385548872 | TXNDC15      |
| ENSG00000084072 | 744.808489  | 897.5341164 | -0.269143532 | 0.266560329 | 0.385548872 | PPIE         |
| ENSG00000133704 | 1207.275725 | 1013.177071 | 0.252778688  | 0.266564581 | 0.385548872 | IPO8         |
| ENSG00000278238 | 4.240153722 | 9.039669269 | -1.090228035 | 0.266645859 | 0.38564496  | AL359513.1   |
| novel.270       | 2.373649595 | 0           | 3.582480707  | 0.266685954 | 1           | -            |
| ENSG00000249022 | 2.373649595 | 0           | 3.582480707  | 0.266685954 | 1           | AC093599.1   |
| ENSG00000204025 | 2.373649595 | 0           | 3.582480707  | 0.266685954 | 1           | TRPC5OS      |
| ENSG00000278213 | 2.373649595 | 0           | 3.582480707  | 0.266685954 | 1           | CNTNAP3P5    |
| ENSG00000239805 | 2.373649595 | 0           | 3.582480707  | 0.266685954 | 1           | AC007547.2   |
| ENSG00000271716 | 2.373649595 | 0           | 3.582480707  | 0.266685954 | 1           | AC022001.2   |
| ENSG00000224094 | 7.623293122 | 13.73835135 | -0.850237917 | 0.266741732 | 0.385762145 | RPS24P8      |
| ENSG00000260345 | 2.766427592 | 0.356539013 | 2.838150322  | 0.266762098 | 0.385770125 | AC009052.1   |
| ENSG00000260954 | 0.616711807 | 2.864080462 | -2.227037792 | 0.266805508 | 0.385790718 | AL133297.1   |
| ENSG00000115221 | 0.909952655 | 3.169868797 | -1.807560849 | 0.266818411 | 0.385790718 | ITGB6        |
| ENSG00000287543 | 5.369025593 | 13.97229243 | -1.37967876  | 0.266820885 | 0.385790718 | AC013486.1   |
| ENSG00000139985 | 6.627664725 | 12.35130601 | -0.901075801 | 0.266873063 | 0.385844689 | ADAM21       |
| ENSG00000248491 | 2.772695836 | 0.336469917 | 2.841144942  | 0.266890217 | 0.385848017 | AC093772.1   |
| ENSG00000268912 | 41.52933692 | 27.64097988 | 0.584939288  | 0.266906151 | 0.385849583 | AC012313.5   |
| ENSG00000263155 | 6.134451935 | 2.180528143 | 1.495684943  | 0.266951676 | 0.385874238 | MYZAP        |
| ENSG00000116885 | 112.8863841 | 146.4540739 | -0.374889495 | 0.26695291  | 0.385874238 | OSCP1        |
| ENSG00000219747 | 5.42697852  | 2.140389951 | 1.340051887  | 0.266971461 | 0.385876838 | AL133260.1   |
| ENSG00000266110 | 0           | 2.079026788 | -3.640964509 | 0.266978641 | 1           | MIR4423      |
| ENSG00000239280 | 0           | 2.079026788 | -3.640964509 | 0.266978641 | 1           | AC108693.1   |
| ENSG00000177770 | 0           | 2.079026788 | -3.640964509 | 0.266978641 | 1           | CDKN2AIPNLP1 |
| ENSG00000234426 | 0           | 2.079026788 | -3.640964509 | 0.266978641 | 1           | AL139042.1   |
| ENSG00000235962 | 0           | 2.079026788 | -3.640964509 | 0.266978641 | 1           | RPL7AP53     |
| ENSG00000269559 | 1.481319294 | 4.881744087 | -1.716829843 | 0.266984414 | 0.385876838 | AC093677.2   |
| novel.790       | 64.39122368 | 35.27597486 | 0.864860054  | 0.2670061   | 0.385886715 | -            |
| ENSG00000169126 | 31.37769616 | 44.20211762 | -0.495015718 | 0.267055422 | 0.385936529 | ARMC4        |
| ENSG00000236364 | 6.335677526 | 12.66873431 | -0.996438266 | 0.267100534 | 0.385978264 | AL358115.1   |
| ENSG00000253330 | 10.24358475 | 5.259508071 | 0.951435724  | 0.267114014 | 0.385978264 | AC024451.2   |
| ENSG00000279138 | 13.54230205 | 5.5357707   | 1.28139793   | 0.26715204  | 0.386011743 | AP002847.1   |
| ENSG00000140497 | 1623.564802 | 1362.961606 | 0.252266971  | 0.267201784 | 0.386062148 | SCAMP2       |
| ENSG00000179082 | 28.06859366 | 13.09750576 | 1.093827898  | 0.267252174 | 0.386113481 | C9orf106     |
| ENSG00000104980 | 748.3163129 | 977.7078801 | -0.385819412 | 0.267277592 | 0.386128732 | TIMM44       |
| ENSG00000286136 | 8.728274395 | 16.42895481 | -0.911673136 | 0.267308722 | 0.386147331 | AC107071.1   |
| ENSG00000180385 | 30.69766083 | 50.76017513 | -0.723119138 | 0.267320192 | 0.386147331 | EMC3-AS1     |
| ENSG00000138613 | 571.5626577 | 475.2499358 | 0.266798923  | 0.267359329 | 0.386182395 | APH1B        |
| ENSG00000244414 | 2.742465724 | 0.693008929 | 1.95475423   | 0.267410389 | 0.386215533 | CFHR1        |
| ENSG00000176853 | 982.2087037 | 1140.486077 | -0.215540652 | 0.267412002 | 0.386215533 | FAM91A1      |
| ENSG00000186395 | 577.2879199 | 710.2339034 | -0.299440869 | 0.267438186 | 0.386231879 | KRT10        |
| ENSG00000220848 | 45.71049753 | 60.48583686 | -0.40474996  | 0.267612529 | 0.386462182 | RPS18P9      |
| ENSG00000233010 | 0           | 2.099095884 | -3.653784662 | 0.267625386 | 1           | RPEP4        |
| ENSG00000240106 | 0           | 2.099095884 | -3.653784662 | 0.267625386 | 1           | RN7SL146P    |
| ENSG00000179674 | 0           | 2.099095884 | -3.653784662 | 0.267625386 | 1           | ARL14        |
| ENSG00000286909 | 5.745434885 | 11.16011852 | -0.965312691 | 0.267693322 | 0.38655737  | AC024560.4   |
| ENSG00000175206 | 4.853104584 | 1.742556871 | 1.458796438  | 0.267811478 | 0.386706498 | NPPA         |
| novel.296       | 3.687734357 | 0.723690511 | 2.352437921  | 0.267934441 | 0.38686255  | -            |

|                 |             |             |              |             |             |             |
|-----------------|-------------|-------------|--------------|-------------|-------------|-------------|
| ENSG00000257221 | 0.879722543 | 3.61729668  | -2.021234126 | 0.267987855 | 0.38691817  | AC007569.1  |
| ENSG00000232811 | 3.620934617 | 7.205067653 | -0.989128509 | 0.268086236 | 0.38701798  | AL360270.1  |
| ENSG00000101230 | 7.043079671 | 14.49285183 | -1.046843038 | 0.268089658 | 0.38701798  | ISM1        |
| ENSG00000163545 | 392.007647  | 508.2388724 | -0.374158516 | 0.268101675 | 0.38701798  | NUAK2       |
| ENSG00000101577 | 1200.01874  | 1010.637599 | 0.248026515  | 0.268219048 | 0.387165903 | LPIN2       |
| ENSG00000273102 | 0.307102255 | 1.823989131 | -2.481742549 | 0.268308382 | 1           | AP000569.1  |
| ENSG00000272182 | 4.515772216 | 1.773238453 | 1.342061627  | 0.268318796 | 0.387288369 | AC135507.1  |
| ENSG00000109586 | 375.2232678 | 458.1756874 | -0.288205595 | 0.268352391 | 0.387315342 | GALNT7      |
| ENSG00000238123 | 15.90112133 | 25.80278224 | -0.701489974 | 0.268443239 | 0.387424942 | MID1IP1-AS1 |
| ENSG00000166595 | 1061.914753 | 1245.49194  | -0.229890582 | 0.268659846 | 0.387701267 | CIAO2B      |
| ENSG00000202337 | 6.301686468 | 2.853467977 | 1.141935772  | 0.268664548 | 0.387701267 | RNU6-8      |
| ENSG00000166886 | 1657.182028 | 1320.606561 | 0.327413235  | 0.268707544 | 0.387741777 | NAB2        |
| ENSG00000267605 | 10.84142055 | 5.461354906 | 0.996561726  | 0.26881586  | 0.387862344 | AC016590.1  |
| novel.654       | 127.0155242 | 184.5245597 | -0.539216213 | 0.268820955 | 0.387862344 | -           |
| ENSG00000287456 | 0.293240848 | 1.823989131 | -2.481758281 | 0.268945568 | 1           | AL157369.1  |
| ENSG00000230005 | 0.293240848 | 1.823989131 | -2.481758281 | 0.268945568 | 1           | SNAP47-AS1  |
| ENSG00000071205 | 462.840864  | 607.8843329 | -0.393724196 | 0.268987232 | 0.388080702 | ARHGAP10    |
| ENSG00000278129 | 218.3233776 | 282.8286781 | -0.372584875 | 0.269023794 | 0.388111899 | ZNF8        |
| ENSG00000117054 | 893.6328888 | 694.0190302 | 0.364334577  | 0.269185682 | 0.388323887 | ACADM       |
| ENSG00000241978 | 4.864458693 | 9.029056784 | -0.89199704  | 0.269261807 | 0.388412138 | AKAP2       |
| ENSG00000270031 | 6.66674165  | 2.985650913 | 1.18074262   | 0.269448848 | 0.388660367 | AL020997.3  |
| ENSG00000113790 | 102.8025832 | 140.8851471 | -0.456515192 | 0.269549923 | 0.388784576 | EHHADH      |
| ENSG00000132522 | 60.02044849 | 42.26023527 | 0.504067492  | 0.269586241 | 0.388815373 | GPS2        |
| ENSG00000227210 | 8.679097009 | 3.465044647 | 1.312090579  | 0.269699226 | 0.388956736 | AC079145.1  |
| ENSG00000103269 | 71.02938831 | 107.2287804 | -0.591956657 | 0.269740716 | 0.388994979 | RHBDL1      |
| ENSG00000253537 | 19.76988035 | 30.64425974 | -0.632541106 | 0.26983192  | 0.389104908 | PCDHGA7     |
| ENSG00000236472 | 0.600343103 | 4.278468152 | -2.830622689 | 0.27000432  | 0.389331904 | AC002401.1  |
| ENSG00000269937 | 6.057551735 | 12.16593225 | -1.00712654  | 0.270119442 | 0.389476288 | AC093525.7  |
| ENSG00000196296 | 24.4870207  | 34.87184882 | -0.505897976 | 0.270151939 | 0.389483762 | ATP2A1      |
| ENSG00000112212 | 4.105371866 | 0.387220594 | 3.41113109   | 0.270154608 | 0.389483762 | TSPO2       |
| novel.226       | 6.734723767 | 2.42610919  | 1.455307315  | 0.270185891 | 0.389507248 | -           |
| ENSG00000233654 | 25.02468102 | 13.96283582 | 0.833404358  | 0.270253763 | 0.389583478 | AC108047.1  |
| ENSG00000092054 | 3.991004395 | 1.049547942 | 1.909023501  | 0.27030931  | 0.389641933 | MYH7        |
| ENSG00000127540 | 541.685968  | 437.5361437 | 0.308216669  | 0.270335606 | 0.389653496 | UQCR11      |
| ENSG00000261423 | 17.68800449 | 9.438786619 | 0.899297867  | 0.270365336 | 0.389653496 | TMEM202-AS1 |
| ENSG00000153832 | 80.61105828 | 105.9500901 | -0.395457774 | 0.2703717   | 0.389653496 | FBXO36      |
| ENSG00000115998 | 185.7781599 | 152.5721524 | 0.284509025  | 0.270377323 | 0.389653496 | C2orf42     |
| ENSG00000270175 | 18.4080144  | 11.31352643 | 0.696627315  | 0.270479742 | 0.389779477 | AC023509.3  |
| ENSG00000234028 | 34.89561742 | 24.89731399 | 0.482534543  | 0.270559669 | 0.389873031 | EIF2AK3-DT  |
| ENSG00000187720 | 538.4378604 | 1698.454724 | -1.657407897 | 0.27068687  | 0.390034694 | THSD4       |
| ENSG00000147099 | 188.6050477 | 228.9246582 | -0.278351897 | 0.270768338 | 0.39012905  | HDAC8       |
| novel.111       | 10.69528459 | 3.475657132 | 1.614468617  | 0.270782385 | 0.39012905  | -           |
| ENSG00000271109 | 2.465593581 | 0           | 3.634327669  | 0.270876225 | 1           | AC008555.4  |
| ENSG00000240405 | 2.465593581 | 0           | 3.634327669  | 0.270876225 | 1           | SAMMSON     |
| ENSG00000211710 | 2.465593581 | 0           | 3.634327669  | 0.270876225 | 1           | TRBV4-1     |
| ENSG00000207590 | 0.308355904 | 1.803920035 | -2.468791847 | 0.270913737 | 1           | MIR215      |
| ENSG00000227470 | 0.308355904 | 1.803920035 | -2.468791847 | 0.270913737 | 1           | AC073415.1  |
| ENSG00000274552 | 0.308355904 | 1.803920035 | -2.468791847 | 0.270913737 | 1           | MIR6889     |
| ENSG00000244286 | 0.307102255 | 1.803920035 | -2.468792352 | 0.270972098 | 1           | ITGB5-AS1   |
| ENSG00000235618 | 15.47184497 | 6.35749494  | 1.278591448  | 0.271004154 | 0.390426912 | FAM21EP     |
| ENSG0000025293  | 1002.174725 | 1162.593516 | -0.214180351 | 0.271062681 | 0.390489577 | PHF20       |

|                 |             |             |              |             |             |             |
|-----------------|-------------|-------------|--------------|-------------|-------------|-------------|
| ENSG00000154832 | 962.4523173 | 796.1939085 | 0.273833389  | 0.271402404 | 0.390957299 | CXXC1       |
| ENSG00000251503 | 0           | 2.169915658 | -3.698237329 | 0.271499059 | 1           | CENPS-CORT  |
| ENSG00000243498 | 0           | 2.169915658 | -3.698237329 | 0.271499059 | 1           | UBA52P5     |
| ENSG00000254606 | 0           | 2.169915658 | -3.698237329 | 0.271499059 | 1           | AC013714.1  |
| ENSG00000178607 | 235.714479  | 303.944033  | -0.366078692 | 0.271669168 | 0.391319879 | ERN1        |
| ENSG00000272537 | 2.458071688 | 0           | 3.630152374  | 0.271685117 | 1           | AC005014.3  |
| ENSG00000254926 | 2.458071688 | 0           | 3.630152374  | 0.271685117 | 1           | AP000445.2  |
| ENSG00000223392 | 2.458071688 | 0           | 3.630152374  | 0.271685117 | 1           | CLDN10-AS1  |
| ENSG00000113262 | 15.4315144  | 9.589882776 | 0.680839171  | 0.27184186  | 0.391546921 | GRM6        |
| ENSG00000129518 | 616.9288705 | 524.6585934 | 0.233958155  | 0.271910309 | 0.391623801 | EAPP        |
| ENSG00000169231 | 649.9947119 | 521.7036709 | 0.317070194  | 0.2720823   | 0.391849791 | THBS3       |
| ENSG00000181555 | 1274.146034 | 1087.295473 | 0.228862963  | 0.272142485 | 0.391914745 | SETD2       |
| ENSG00000152942 | 52.20491843 | 98.99055635 | -0.923542237 | 0.272310397 | 0.39213482  | RAD17       |
| ENSG00000226286 | 2.451732174 | 0           | 3.626604399  | 0.272371737 | 1           | AL008733.1  |
| ENSG00000173930 | 2.451732174 | 0           | 3.626604399  | 0.272371737 | 1           | SLCO4C1     |
| ENSG00000258390 | 2.451732174 | 0           | 3.626604399  | 0.272371737 | 1           | LINC02318   |
| ENSG00000286217 | 2.451732174 | 0           | 3.626604399  | 0.272371737 | 1           | AC064829.1  |
| ENSG00000171475 | 921.1908631 | 761.197522  | 0.275453682  | 0.272422566 | 0.392254538 | WIPF2       |
| ENSG00000196436 | 114.5221167 | 48.04179695 | 1.255059118  | 0.272428096 | 0.392254538 | NPIP15      |
| ENSG00000248774 | 6.684364003 | 3.210006989 | 1.052833488  | 0.272438826 | 0.392254538 | AC097534.1  |
| ENSG00000262180 | 5.141330836 | 1.874739808 | 1.479818563  | 0.272488277 | 0.392303996 | OCLM        |
| ENSG00000168610 | 2804.545067 | 2314.667493 | 0.27682045   | 0.272567147 | 0.392395802 | STAT3       |
| ENSG00000135940 | 2140.931341 | 2493.13703  | -0.219724386 | 0.272584233 | 0.392398657 | COX5B       |
| ENSG00000233705 | 9.517520064 | 3.812127049 | 1.305039393  | 0.272652967 | 0.392475856 | SLC26A4-AS1 |
| ENSG00000101493 | 1215.604925 | 917.0114123 | 0.406966028  | 0.272696905 | 0.392517356 | ZNF516      |
| ENSG00000274641 | 0           | 2.058957692 | -3.627920592 | 0.272831934 | 1           | HIST1H2BO   |
| ENSG00000162723 | 0           | 2.058957692 | -3.627920592 | 0.272831934 | 1           | SLAMF9      |
| ENSG00000184307 | 11.32356397 | 21.97431051 | -0.962473942 | 0.272939258 | 0.392844432 | ZDHHC23     |
| ENSG00000157326 | 27.82517094 | 12.64049287 | 1.134497598  | 0.273121574 | 0.393085066 | DHRS4       |
| ENSG00000172775 | 1425.552131 | 1234.517931 | 0.207380906  | 0.273187192 | 0.393157727 | FAM192A     |
| ENSG00000121542 | 239.1660713 | 281.6568834 | -0.235765331 | 0.273329275 | 0.393340418 | SEC22A      |
| ENSG00000258521 | 14.60437418 | 7.082341327 | 1.041933204  | 0.273364192 | 0.393368877 | AL157871.2  |
| ENSG00000213071 | 13.69972086 | 25.14302343 | -0.880947202 | 0.273441166 | 0.393457849 | LPAL2       |
| ENSG00000204072 | 4.83548223  | 1.783850939 | 1.436098603  | 0.273596379 | 0.393659386 | ARMCX7P     |
| ENSG00000243302 | 236.3684606 | 160.5785712 | 0.55860881   | 0.273661221 | 0.393725682 | AC018638.4  |
| ENSG00000114904 | 318.4111748 | 378.3395277 | -0.24925806  | 0.273672765 | 0.393725682 | NEK4        |
| ENSG00000198420 | 31.52487231 | 52.35723964 | -0.72894908  | 0.273718011 | 0.393768972 | TCAF1       |
| ENSG00000197702 | 2287.406978 | 2756.277784 | -0.269122884 | 0.27384079  | 0.39392379  | PARVA       |
| ENSG00000255237 | 6.639018835 | 3.210006989 | 1.04534345   | 0.273882417 | 0.393961857 | AC138230.1  |
| ENSG00000162641 | 6.681856706 | 3.220619475 | 1.050156586  | 0.273947489 | 0.394005173 | AKNAD1      |
| ENSG00000074211 | 3.680141193 | 8.082294466 | -1.145944269 | 0.273947644 | 0.394005173 | PPP2R2C     |
| ENSG00000085276 | 94.90313033 | 64.34653123 | 0.559016062  | 0.273958025 | 0.394005173 | MECOM       |
| ENSG00000276757 | 1.773306493 | 5.461354906 | -1.609789    | 0.27415112  | 0.394261057 | RN7SL192P   |
| ENSG00000198744 | 9.172737075 | 3.291439249 | 1.48370984   | 0.274239462 | 0.394366273 | MTCO3P12    |
| ENSG00000255200 | 26.74512045 | 16.63324179 | 0.680072112  | 0.274290971 | 0.394418515 | PGAM1P8     |
| ENSG00000163632 | 6.915890978 | 3.169868797 | 1.116825901  | 0.274476048 | 0.394662803 | C3orf49     |
| ENSG00000161542 | 1003.582605 | 840.5362999 | 0.255644547  | 0.274499856 | 0.394675194 | PRPSAP1     |
| ENSG00000236875 | 3.812131018 | 0           | 4.265366706  | 0.274576022 | 0.394762859 | DDX11L5     |
| ENSG00000270105 | 2.66939774  | 0.387220594 | 2.791036655  | 0.274608595 | 0.39478219  | AC136475.8  |
| ENSG00000183506 | 293.8257719 | 382.6778523 | -0.380436823 | 0.274619858 | 0.39478219  | PI4KAP2     |
| ENSG00000230732 | 4.149463386 | 9.945137519 | -1.249852623 | 0.274640514 | 0.39479004  | AC016949.1  |

|                 |             |             |              |             |             |            |
|-----------------|-------------|-------------|--------------|-------------|-------------|------------|
| ENSG00000207561 | 33.22274572 | 48.63959748 | -0.546007534 | 0.274896585 | 0.395118919 | MIR635     |
| ENSG00000261342 | 17.53964596 | 8.216917548 | 1.082147107  | 0.274900006 | 0.395118919 | AC006538.2 |
| ENSG00000234118 | 0.615458159 | 2.446178286 | -2.011322271 | 0.274914926 | 0.395118919 | RPL13AP6   |
| ENSG00000101363 | 948.3068638 | 1100.550767 | -0.21467259  | 0.274956001 | 0.395156094 | MANBAL     |
| ENSG00000256452 | 0.308355904 | 1.773238453 | -2.449431306 | 0.274976374 | 1           | AP003170.3 |
| ENSG00000073598 | 0.307102255 | 1.773238453 | -2.449430186 | 0.275036307 | 1           | FNDC8      |
| ENSG00000157322 | 7.243122884 | 3.597227584 | 1.012103336  | 0.275051912 | 0.395272069 | CLEC18A    |
| ENSG00000116016 | 3899.227343 | 3096.119206 | 0.332722557  | 0.275098578 | 0.395317265 | EPAS1      |
| ENSG00000140044 | 1307.290453 | 1075.121579 | 0.282342046  | 0.27523846  | 0.395496401 | JDP2       |
| ENSG00000267470 | 41.74693122 | 28.74945084 | 0.540055734  | 0.275321716 | 0.395594154 | ZNF571-AS1 |
| ENSG00000268140 | 0.308355904 | 1.854670712 | -2.501397342 | 0.275427641 | 1           | PCGF7P     |
| ENSG00000167419 | 0.308355904 | 1.854670712 | -2.501397342 | 0.275427641 | 1           | LPO        |
| ENSG00000229376 | 5.414370761 | 1.386017859 | 1.951107644  | 0.275446465 | 0.395751513 | CICP3      |
| ENSG00000119946 | 0.307102255 | 1.854670712 | -2.501399956 | 0.275482881 | 1           | CNNM1      |
| ENSG00000287458 | 0.89358395  | 3.801514564 | -2.088053348 | 0.275525486 | 0.395805897 | AL033519.4 |
| ENSG00000196712 | 1726.535437 | 1407.585894 | 0.294825417  | 0.27552604  | 0.395805897 | NF1        |
| ENSG00000112139 | 131.0045904 | 91.09491991 | 0.523151967  | 0.275539766 | 0.395805897 | MDGA1      |
| ENSG00000225808 | 8.093868963 | 3.9336975   | 1.041714199  | 0.275551287 | 0.395805897 | DNAJC19P5  |
| ENSG00000248734 | 7.935481243 | 15.20477398 | -0.943538926 | 0.275560489 | 0.395805897 | AC008906.1 |
| ENSG00000171496 | 3.296210009 | 0.774441189 | 2.138251565  | 0.275629465 | 0.395883085 | OR1L8      |
| ENSG00000263466 | 1.481319294 | 4.555886656 | -1.616026125 | 0.275701302 | 0.395957018 | AC006441.1 |
| ENSG00000207467 | 0.293240848 | 1.773238453 | -2.449417776 | 0.275701989 | 1           | RF00019    |
| ENSG00000200356 | 2.66939774  | 0.356539013 | 2.791022261  | 0.275711421 | 0.395957018 | RNU6-833P  |
| ENSG00000231550 | 2.142122621 | 0.336469917 | 2.468757145  | 0.275772279 | 1           | PTCHD3P2   |
| ENSG00000164530 | 41.77418332 | 16.09505343 | 1.371593728  | 0.275854215 | 0.396140192 | PI16       |
| novel.357       | 5.66226644  | 1.069617038 | 2.402115923  | 0.275873488 | 0.396145974 | -          |
| ENSG00000215867 | 2.666890443 | 0.356539013 | 2.789792352  | 0.275948245 | 0.396231422 | KRT18P57   |
| ENSG00000259424 | 1.21705491  | 3.587770973 | -1.562644627 | 0.275988189 | 0.396266878 | IRAIN      |
| ENSG00000223984 | 0.586481695 | 3.485113743 | -2.559798119 | 0.276034433 | 0.396311373 | HNRNRP1    |
| ENSG00000162378 | 771.1213704 | 642.5165637 | 0.26336002   | 0.276058046 | 0.396323374 | ZYG11B     |
| ENSG00000189136 | 47.27950167 | 29.62192576 | 0.676846311  | 0.276098593 | 0.396359682 | UBE2Q2P1   |
| ENSG00000228906 | 10.58600298 | 5.003314538 | 1.079455604  | 0.276126045 | 0.39637719  | AL353804.1 |
| ENSG00000053501 | 355.7361444 | 297.4034889 | 0.258200061  | 0.276170812 | 0.396419551 | USE1       |
| ENSG00000251667 | 0           | 1.467450118 | -3.130003763 | 0.276221108 | 1           | BRCC3P1    |
| ENSG00000254314 | 0           | 1.467450118 | -3.130003763 | 0.276221108 | 1           | AC021915.2 |
| ENSG00000241362 | 5.072023799 | 1.722487775 | 1.538653498  | 0.276397916 | 0.39672362  | RPL36AP43  |
| ENSG00000126883 | 904.2411873 | 1034.636555 | -0.194321233 | 0.276490698 | 0.39683487  | NUP214     |
| ENSG00000125965 | 16.9595747  | 108.6761614 | -2.680079357 | 0.27658513  | 0.396943647 | GDF5       |
| ENSG00000267416 | 3.977142987 | 9.069194976 | -1.190729851 | 0.276597043 | 0.396943647 | AC025048.4 |
| ENSG00000223806 | 0.908699006 | 2.954969332 | -1.690980377 | 0.276643149 | 0.396987885 | LINC00114  |
| ENSG00000171310 | 517.452355  | 357.3177804 | 0.534778224  | 0.276783798 | 0.397167782 | CHST11     |
| ENSG00000247287 | 12.7520162  | 5.454338441 | 1.209545354  | 0.276865048 | 0.397262429 | AL359220.1 |
| ENSG00000114395 | 240.4723491 | 303.6068524 | -0.33696686  | 0.276949663 | 0.397361895 | CYB561D2   |
| ENSG00000237931 | 0.907445357 | 3.159256312 | -1.805923992 | 0.276987406 | 0.397383314 | CLIC4P3    |
| ENSG00000169884 | 14.34540913 | 6.63478505  | 1.119460124  | 0.276995182 | 0.397383314 | WNT10B     |
| ENSG00000178229 | 79.27601749 | 61.84934548 | 0.358052658  | 0.277051106 | 0.397441598 | ZNF543     |
| ENSG00000269903 | 9.941497088 | 4.872287477 | 1.015907189  | 0.277086312 | 0.397470156 | AC025165.4 |
| ENSG00000049130 | 531.6132087 | 921.9757383 | -0.794514674 | 0.277109196 | 0.397481037 | KITLG      |
| ENSG00000164096 | 2379.780166 | 3132.083728 | -0.396229509 | 0.277146388 | 0.397512438 | C4orf3     |
| ENSG00000274026 | 22.86869699 | 13.47167372 | 0.758183242  | 0.277264941 | 0.397658681 | FAM27E3    |
| ENSG00000152242 | 559.3686731 | 483.2467352 | 0.211085279  | 0.27727896  | 0.397658681 | C18orf25   |

|                 |             |             |              |             |             |            |
|-----------------|-------------|-------------|--------------|-------------|-------------|------------|
| ENSG00000107643 | 590.0449228 | 503.4456711 | 0.228906904  | 0.277361143 | 0.397754587 | MAPK8      |
| ENSG00000228463 | 23.38300834 | 14.06189703 | 0.73671703   | 0.277444713 | 0.397847717 | AP006222.1 |
| ENSG00000204842 | 808.5544113 | 975.4999711 | -0.270488031 | 0.27745671  | 0.397847717 | ATXN2      |
| ENSG00000006047 | 5.794541    | 2.241891306 | 1.389579485  | 0.277645565 | 0.398096547 | YBX2       |
| ENSG00000115204 | 1064.708164 | 1266.820806 | -0.25095998  | 0.27771401  | 0.398172711 | MPV17      |
| ENSG00000176125 | 27.61592491 | 40.1552788  | -0.54482072  | 0.277834978 | 0.398324167 | UFSP1      |
| ENSG00000274020 | 62.86545686 | 89.44312352 | -0.509648957 | 0.277991903 | 0.398527156 | LINC01138  |
| ENSG00000116251 | 3239.654913 | 2698.435608 | 0.263731141  | 0.278061867 | 0.398605461 | RPL22      |
| ENSG00000253608 | 0.616711807 | 3.657434872 | -2.574333609 | 0.278226797 | 0.39881037  | AC022915.2 |
| ENSG00000116096 | 150.5285845 | 187.0253283 | -0.314050699 | 0.278235509 | 0.39881037  | SPR        |
| ENSG00000181781 | 7.698868403 | 1.548882377 | 2.333678773  | 0.2782557   | 0.398817308 | ODF3L2     |
| ENSG00000232838 | 26.02754657 | 35.72785066 | -0.454971818 | 0.278295277 | 0.398826259 | PET117     |
| ENSG00000259432 | 0.293240848 | 2.406040094 | -2.89238531  | 0.278300092 | 0.398826259 | AC023908.1 |
| ENSG00000265136 | 1.541779519 | 5.390535133 | -1.812696939 | 0.2783185   | 0.398826259 | AC124283.4 |
| ENSG00000244056 | 4.515772216 | 1.753169357 | 1.35137891   | 0.278323348 | 0.398826259 | RN7SL417P  |
| ENSG00000247315 | 657.1473416 | 557.9568669 | 0.23575997   | 0.27846213  | 0.399003121 | ZCCHC3     |
| ENSG00000250848 | 1.81990531  | 4.963176346 | -1.451759369 | 0.278506058 | 0.399044057 | AC021087.2 |
| ENSG00000016402 | 15.70734636 | 5.747074145 | 1.449425781  | 0.278550282 | 0.399085413 | IL20RA     |
| ENSG00000286905 | 9.102105118 | 4.993857928 | 0.861634038  | 0.27865853  | 0.399218487 | AC108488.2 |
| ENSG00000159625 | 6.983944366 | 2.375358513 | 1.53254776   | 0.278684427 | 0.399233574 | DRC7       |
| ENSG00000080618 | 3.034452922 | 0.774441189 | 2.020856884  | 0.27870133  | 0.399235776 | CPB2       |
| ENSG00000177725 | 0           | 3.208851114 | -4.263619085 | 0.278767362 | 0.399308348 | AC105206.1 |
| ENSG00000218027 | 3.033199274 | 0.774441189 | 2.020359194  | 0.278801787 | 0.399335643 | AL512329.1 |
| ENSG00000278570 | 5.951746342 | 12.00537948 | -1.010230669 | 0.278985679 | 0.399577008 | NR2E3      |
| ENSG00000285090 | 17.39351    | 9.998328342 | 0.799009516  | 0.279112775 | 0.399737004 | AC002074.1 |
| ENSG00000276578 | 3.925529575 | 1.436768536 | 1.451204467  | 0.279185106 | 0.399818556 | AC004696.1 |
| ENSG00000240280 | 5.423217574 | 2.058957692 | 1.372950036  | 0.279226874 | 0.399856331 | TCAM1P     |
| ENSG00000286575 | 4.747299191 | 1.130980201 | 2.093981266  | 0.279287007 | 0.3999204   | AL356608.2 |
| ENSG00000185674 | 3.895299463 | 0.672939833 | 2.501628043  | 0.279305014 | 0.399924143 | LYG2       |
| ENSG00000226887 | 1.536764924 | 4.881744087 | -1.680199068 | 0.279328263 | 0.39993539  | ERVMER34-1 |
| novel.979       | 15.72364379 | 3.841652756 | 2.028056126  | 0.279431558 | 0.400061239 | -          |
| ENSG00000144749 | 328.0215083 | 541.0394091 | -0.721601921 | 0.279503722 | 0.400117156 | LRIG1      |
| ENSG00000274528 | 3.08105174  | 8.030259519 | -1.384827435 | 0.279510881 | 0.400117156 | AC090970.2 |
| ENSG00000257660 | 2.961384939 | 0.693008929 | 2.07570196   | 0.279516816 | 0.400117156 | AC117498.2 |
| ENSG00000255409 | 3.281094953 | 0.693008929 | 2.223908709  | 0.279545993 | 0.400136877 | RSF1-IT1   |
| ENSG00000230724 | 11.92745455 | 5.727005049 | 1.059931445  | 0.279617885 | 0.400200329 | LINC01001  |
| ENSG00000166578 | 32.30143895 | 48.34210988 | -0.577916059 | 0.279631425 | 0.400200329 | IQCD       |
| ENSG00000168228 | 250.6594209 | 188.8162429 | 0.4086877    | 0.279636533 | 0.400200329 | ZCCHC4     |
| ENSG00000172819 | 960.7951419 | 755.3528344 | 0.347491999  | 0.279707787 | 0.400280254 | RARG       |
| ENSG00000213625 | 2306.720262 | 2922.551993 | -0.341498062 | 0.279734932 | 0.400297052 | LEPROT     |
| ENSG00000182810 | 186.266429  | 229.7435228 | -0.303224804 | 0.279752117 | 0.400299596 | DDX28      |
| ENSG00000261570 | 3.019337866 | 0.774441189 | 2.01480758   | 0.279921609 | 0.400520064 | AC073878.1 |
| ENSG00000197580 | 176.942071  | 97.47805339 | 0.858759145  | 0.279992335 | 0.400599199 | BCO2       |
| ENSG00000146409 | 256.3307316 | 198.9695202 | 0.364237473  | 0.280072363 | 0.400691633 | SLC18B1    |
| ENSG00000262703 | 2.463086283 | 6.421169854 | -1.390403718 | 0.280111132 | 0.400725032 | AC009121.1 |
| ENSG00000133313 | 2096.792881 | 1632.616487 | 0.360792321  | 0.280145977 | 0.400752815 | CNDP2      |
| ENSG00000148175 | 2035.081534 | 2777.117955 | -0.448608058 | 0.280325204 | 0.400987124 | STOM       |
| ENSG00000148814 | 249.9507929 | 199.4998746 | 0.326123871  | 0.280402276 | 0.401075288 | LRRRC27    |
| ENSG00000134809 | 387.2209271 | 547.560136  | -0.500386771 | 0.280460108 | 0.401126338 | TIMM10     |
| ENSG00000234338 | 13.48184183 | 7.561606666 | 0.838246293  | 0.280468845 | 0.401126338 | AC073349.2 |
| ENSG00000167780 | 11.70248056 | 3.331577441 | 1.818040179  | 0.280523251 | 0.401182066 | SOAT2      |

|                 |             |             |              |             |             |            |
|-----------------|-------------|-------------|--------------|-------------|-------------|------------|
| ENSG00000090565 | 140.4135565 | 177.7962229 | -0.339828252 | 0.280816204 | 0.401578919 | RAB11FIP3  |
| ENSG00000273432 | 5.788272756 | 2.567748738 | 1.183921805  | 0.280836703 | 0.40158613  | AC004951.4 |
| ENSG00000272829 | 6.625157428 | 3.210006989 | 1.043092477  | 0.280893729 | 0.401645568 | AC002470.1 |
| ENSG00000231701 | 7.970797221 | 1.783850939 | 2.157653635  | 0.280928638 | 0.401673378 | BMS1P13    |
| ENSG00000277782 | 25.72420526 | 15.02184037 | 0.76860685   | 0.280962121 | 0.401699145 | AC068870.2 |
| ENSG00000158865 | 2.081662396 | 0.387220594 | 2.43354797   | 0.280983077 | 1           | SLC5A11    |
| ENSG00000285420 | 3.969621095 | 1.436768536 | 1.463864303  | 0.281029345 | 0.401773148 | AC011342.1 |
| ENSG00000153130 | 1432.056565 | 1697.131402 | -0.245075936 | 0.281203682 | 0.401995979 | SCOC       |
| ENSG00000106617 | 535.8584751 | 420.759849  | 0.348274295  | 0.281216155 | 0.401995979 | PRKAG2     |
| ENSG00000226478 | 3.063429386 | 6.909891803 | -1.174893464 | 0.281295713 | 0.402087584 | UPF3AP1    |
| ENSG00000240571 | 0.923814062 | 3.159256312 | -1.791013821 | 0.28134821  | 0.402140498 | AC087071.2 |
| ENSG00000114127 | 899.1197319 | 724.3366834 | 0.31198326   | 0.281431035 | 0.402227603 | XRN1       |
| ENSG00000270574 | 4.841750474 | 1.773238453 | 1.442153354  | 0.281440114 | 0.402227603 | AC010680.2 |
| ENSG00000203780 | 37.85943838 | 55.44978578 | -0.553091291 | 0.281473837 | 0.402253673 | FANK1      |
| ENSG00000285560 | 0.293240848 | 2.375358513 | -2.876037519 | 0.281520007 | 1           | AC103739.3 |
| ENSG00000214796 | 8.263966798 | 15.17640415 | -0.883940382 | 0.281586384 | 0.402392379 | AC098934.1 |
| ENSG00000261730 | 4.314475354 | 0.713078025 | 2.59155891   | 0.281687972 | 0.402515411 | AL034346.1 |
| ENSG00000276178 | 0           | 1.436768536 | -3.103943883 | 0.28186515  | 1           | RF00019    |
| ENSG00000185130 | 0           | 1.436768536 | -3.103943883 | 0.28186515  | 1           | HIST1H2BL  |
| ENSG00000231074 | 0           | 1.436768536 | -3.103943883 | 0.28186515  | 1           | HCG18      |
| ENSG00000269898 | 0           | 1.436768536 | -3.103943883 | 0.28186515  | 1           | AC018695.2 |
| ENSG00000267909 | 0           | 1.436768536 | -3.103943883 | 0.28186515  | 1           | CCDC177    |
| ENSG00000214424 | 0           | 1.436768536 | -3.103943883 | 0.28186515  | 1           | FAM149B1P1 |
| ENSG00000225830 | 452.4121536 | 637.4362558 | -0.495021208 | 0.281889763 | 0.402770139 | ERCC6      |
| ENSG00000278356 | 3.340301529 | 1.029478846 | 1.665155513  | 0.28189724  | 0.402770139 | AC005911.1 |
| ENSG00000131944 | 48.15728638 | 68.15408196 | -0.504263771 | 0.281993064 | 0.402884894 | FAAP24     |
| ENSG00000140391 | 4600.937027 | 3931.849946 | 0.226639903  | 0.282054494 | 0.402950501 | TSPAN3     |
| ENSG00000176753 | 3.341555177 | 1.049547942 | 1.650928008  | 0.28208525  | 0.402972281 | C15orf56   |
| ENSG00000233613 | 8.856432003 | 3.260757667 | 1.447705655  | 0.282110192 | 0.402985754 | DCUN1D2-AS |
| ENSG00000285018 | 1.188078446 | 4.819096654 | -2.008102435 | 0.282144712 | 0.402990111 | AC245140.3 |
| ENSG00000266126 | 2.081662396 | 0.356539013 | 2.43352419   | 0.282156469 | 1           | AC005730.3 |
| ENSG00000224413 | 3.368024343 | 7.409354633 | -1.147139216 | 0.282157895 | 0.402990111 | AP001476.1 |
| ENSG00000152778 | 819.5433046 | 659.9934699 | 0.311853468  | 0.282159775 | 0.402990111 | IFIT5      |
| ENSG00000133247 | 366.8163012 | 272.6915359 | 0.428752599  | 0.282206399 | 0.403034545 | KMT5C      |
| ENSG00000104824 | 1.200686205 | 3.577158488 | -1.570757174 | 0.282233272 | 0.403050768 | HNRNPL     |
| ENSG00000246859 | 70.0322928  | 97.79564445 | -0.480246081 | 0.282385517 | 0.403246022 | STARD4-AS1 |
| ENSG00000249001 | 2.361041837 | 0           | 3.575103849  | 0.282477668 | 1           | AC093895.1 |
| ENSG00000246774 | 2.361041837 | 0           | 3.575103849  | 0.282477668 | 1           | ZCCHC23    |
| ENSG00000227269 | 2.361041837 | 0           | 3.575103849  | 0.282477668 | 1           | AL162427.1 |
| ENSG00000139613 | 1754.245871 | 1483.618699 | 0.241843494  | 0.282496543 | 0.403382395 | SMARCC2    |
| ENSG00000241962 | 9.343732554 | 4.179278547 | 1.149323351  | 0.282594248 | 0.403476608 | AC079447.1 |
| ENSG00000213785 | 2.359788188 | 0           | 3.574381482  | 0.282621222 | 1           | AKR1B1P3   |
| ENSG00000287069 | 2.359788188 | 0           | 3.574381482  | 0.282621222 | 1           | AC061958.1 |
| ENSG00000219507 | 169.9081229 | 268.4039498 | -0.658866098 | 0.282629693 | 0.403476608 | FTH1P8     |
| ENSG00000285873 | 3.700270845 | 0           | 4.220691767  | 0.2826557   | 0.403476608 | AL445253.1 |
| ENSG00000251158 | 3.700270845 | 0           | 4.220691767  | 0.2826557   | 0.403476608 | AC131392.2 |
| ENSG00000154611 | 3.700270845 | 0           | 4.220691767  | 0.2826557   | 0.403476608 | PSMA8      |
| ENSG00000225760 | 3.700270845 | 0           | 4.220691767  | 0.2826557   | 0.403476608 | LINC00431  |
| ENSG00000287729 | 4.590093848 | 1.4981317   | 1.636814781  | 0.282684447 | 0.403495475 | AF241728.2 |
| ENSG00000272910 | 7.212892771 | 3.577158488 | 1.0122404    | 0.282744748 | 0.403559374 | AC090425.2 |
| ENSG00000105642 | 30.6822176  | 16.43712715 | 0.902501996  | 0.28280642  | 0.403625225 | KCNN1      |

|                 |             |             |              |             |             |             |
|-----------------|-------------|-------------|--------------|-------------|-------------|-------------|
| ENSG00000172164 | 481.2445924 | 596.0774826 | -0.30845753  | 0.283098167 | 0.404014004 | SNTB1       |
| ENSG00000255769 | 3.839853833 | 9.752747295 | -1.336667508 | 0.283109925 | 0.404014004 | GOLGA2P10   |
| ENSG00000171462 | 33.064358   | 43.92341485 | -0.409302792 | 0.283181681 | 0.404094209 | DLK2        |
| ENSG00000287291 | 3.282348601 | 0.774441189 | 2.131846636  | 0.283266726 | 0.404193366 | AC068286.2  |
| ENSG00000111300 | 628.0657993 | 807.5090228 | -0.362519821 | 0.283295985 | 0.404212916 | NAA25       |
| ENSG00000244681 | 3.685227059 | 0           | 4.214955791  | 0.283320943 | 0.404226328 | MTHFD2P1    |
| ENSG00000260672 | 2.695866906 | 0.693008929 | 1.935793518  | 0.283408659 | 0.404314484 | AC100827.4  |
| ENSG00000183535 | 1.229662669 | 4.83099341  | -1.985855124 | 0.283440884 | 0.404314484 | COL18A1-AS1 |
| ENSG00000196507 | 1006.186373 | 866.4054411 | 0.216052036  | 0.283443645 | 0.404314484 | TCEAL3      |
| ENSG00000140548 | 400.5032673 | 510.166709  | -0.348600775 | 0.28346188  | 0.404314484 | ZNF710      |
| ENSG00000251669 | 26.08542823 | 40.61575931 | -0.642920977 | 0.283470982 | 0.404314484 | FAM86EP     |
| ENSG00000287242 | 3.001715513 | 7.194455167 | -1.257129491 | 0.283476104 | 0.404314484 | AC073593.2  |
| ENSG00000258102 | 64.91918298 | 85.69557047 | -0.398764335 | 0.283579767 | 0.404440134 | MAP1LC3B2   |
| ENSG00000275236 | 0.308355904 | 1.793307549 | -2.462459968 | 0.283603199 | 1           | AC009120.5  |
| ENSG00000287029 | 0.308355904 | 1.793307549 | -2.462459968 | 0.283603199 | 1           | AL162713.2  |
| ENSG00000250551 | 0.307102255 | 1.793307549 | -2.462459848 | 0.283661306 | 1           | MIR583HG    |
| ENSG00000108187 | 176.8250541 | 116.1464594 | 0.604669407  | 0.283697675 | 0.404550353 | PBLD        |
| ENSG00000255874 | 56.42655216 | 31.49080497 | 0.840453089  | 0.283703721 | 0.404550353 | LINC00346   |
| ENSG00000259982 | 2.773949485 | 0.356539013 | 2.84191585   | 0.283718977 | 0.404550353 | CDC37P1     |
| ENSG00000234492 | 6.136959233 | 2.241891306 | 1.469163432  | 0.283719333 | 0.404550353 | RPL34-AS1   |
| ENSG00000163312 | 223.2659467 | 185.8587863 | 0.264215396  | 0.283773705 | 0.404605676 | HELQ        |
| ENSG00000189079 | 411.4460919 | 328.2465002 | 0.326722535  | 0.283792921 | 0.404610869 | ARID2       |
| ENSG00000276945 | 4.48930305  | 1.10029862  | 2.039883859  | 0.283832529 | 0.404645135 | AC008498.1  |
| ENSG00000168992 | 4.175932552 | 1.00940975  | 2.017659876  | 0.284144473 | 0.40506763  | OR7E102P    |
| ENSG00000151553 | 584.7883822 | 729.9782534 | -0.32040147  | 0.284187317 | 0.405106478 | FAM160B1    |
| ENSG00000136521 | 1050.317832 | 1341.198437 | -0.35283865  | 0.284221923 | 0.40513358  | NDUFB5      |
| ENSG00000189089 | 0           | 2.069570178 | -3.634360578 | 0.284292142 | 1           | RIMKLB1     |
| ENSG00000178772 | 2.765173943 | 0.356539013 | 2.837700625  | 0.284529307 | 0.40554948  | CPN2        |
| ENSG00000017797 | 2323.477644 | 2025.579316 | 0.197953817  | 0.284659523 | 0.405712823 | RALBP1      |
| ENSG00000148660 | 580.9816377 | 742.3501515 | -0.353170571 | 0.284718855 | 0.405770903 | CAMK2G      |
| ENSG00000241322 | 3.060922088 | 0.672939833 | 2.14179122   | 0.284731509 | 0.405770903 | CDRT1       |
| ENSG00000276533 | 4.542241382 | 1.854670712 | 1.314243885  | 0.284846759 | 0.405912881 | AC018926.2  |
| ENSG00000164616 | 0           | 3.097764754 | -4.208659622 | 0.285151436 | 0.406280201 | FBXL21P     |
| ENSG00000258760 | 0           | 3.097764754 | -4.208659622 | 0.285151436 | 0.406280201 | AL355076.2  |
| novel.933       | 0           | 3.097764754 | -4.208659622 | 0.285151436 | 0.406280201 | -           |
| ENSG00000269696 | 33.00765872 | 22.32584084 | 0.570339853  | 0.285174589 | 0.406290908 | AC005498.3  |
| ENSG00000182040 | 2.765173943 | 0.336469917 | 2.837705896  | 0.285194041 | 0.406296342 | USH1G       |
| ENSG00000125650 | 59.50606587 | 76.48370846 | -0.361501704 | 0.285328756 | 0.406465973 | PSPN        |
| novel.849       | 10.92201043 | 6.135450615 | 0.834559461  | 0.285396176 | 0.406539726 | -           |
| ENSG00000227329 | 9.271918219 | 3.689272328 | 1.340936477  | 0.285414278 | 0.406543222 | AL139396.1  |
| ENSG00000275132 | 0.307102255 | 2.231278821 | -2.771306815 | 0.285442001 | 1           | RN7SL663P   |
| ENSG00000236035 | 0.307102255 | 2.231278821 | -2.771306815 | 0.285442001 | 1           | AL513343.1  |
| ENSG00000110169 | 51.67714547 | 33.81271588 | 0.617288278  | 0.285479755 | 0.406614194 | HPX         |
| ENSG00000163513 | 7072.004212 | 9151.938552 | -0.371996246 | 0.285523521 | 0.406654237 | TGFBR2      |
| ENSG00000282034 | 14.82232449 | 8.824769804 | 0.75931113   | 0.285603364 | 0.406745655 | AC106886.5  |
| ENSG00000227620 | 4.306953462 | 1.029478846 | 2.040185911  | 0.28562833  | 0.406755161 | ALG1L8P     |
| ENSG00000055147 | 362.2560221 | 457.1182368 | -0.336248376 | 0.28564135  | 0.406755161 | FAM114A2    |
| ENSG00000254485 | 0           | 1.41669944  | -3.086337318 | 0.285691199 | 1           | AC026191.1  |
| ENSG00000264230 | 0           | 1.41669944  | -3.086337318 | 0.285691199 | 1           | ANXA8L1     |
| ENSG00000198074 | 0           | 1.41669944  | -3.086337318 | 0.285691199 | 1           | AKR1B10     |
| ENSG00000287080 | 0           | 1.41669944  | -3.086337318 | 0.285691199 | 1           | HIST1H3C    |



|                 |             |             |              |             |             |            |
|-----------------|-------------|-------------|--------------|-------------|-------------|------------|
| ENSG00000235077 | 0           | 1.41669944  | -3.086337318 | 0.285691199 | 1           | AC073842.1 |
| ENSG00000225705 | 0           | 1.41669944  | -3.086337318 | 0.285691199 | 1           | AC004899.1 |
| ENSG00000232486 | 0           | 1.41669944  | -3.086337318 | 0.285691199 | 1           | AL592437.2 |
| ENSG00000237505 | 11.16489151 | 5.787212337 | 0.951730306  | 0.285696455 | 0.406811334 | PKN2-AS1   |
| ENSG00000105443 | 1478.136084 | 1223.522347 | 0.272847825  | 0.285786494 | 0.406917242 | CYTH2      |
| ENSG00000134864 | 78.04037131 | 107.9004016 | -0.469010453 | 0.285808271 | 0.406925948 | GGACT      |
| ENSG00000100483 | 168.0233557 | 140.0556701 | 0.263164653  | 0.285896611 | 0.407029419 | VCPKMT     |
| ENSG00000286675 | 2.750058887 | 0.356539013 | 2.830389131  | 0.285936907 | 0.407064482 | AC068700.2 |
| ENSG00000278949 | 8.603521728 | 17.2825165  | -1.001230119 | 0.28605682  | 0.407212878 | AC127070.4 |
| ENSG00000205981 | 537.9224883 | 455.7976448 | 0.238577547  | 0.28608709  | 0.407233656 | DNAJC19    |
| novel.603       | 235.510889  | 188.4677479 | 0.321194921  | 0.286356813 | 0.407595265 | -          |
| ENSG00000047579 | 220.2600708 | 164.3076906 | 0.421535717  | 0.286388947 | 0.407618672 | DTNBP1     |
| ENSG00000110367 | 2878.201347 | 2535.34427  | 0.18293567   | 0.28654045  | 0.407811966 | DDX6       |
| ENSG00000254458 | 3.053328925 | 7.939370649 | -1.380372966 | 0.286623352 | 0.407907609 | AP001107.3 |
| ENSG00000260644 | 0.293240848 | 2.261960402 | -2.788885922 | 0.286648431 | 1           | HERC2P5    |
| ENSG00000172728 | 93.0776406  | 119.9815624 | -0.368235786 | 0.286667305 | 0.407947815 | FUT10      |
| ENSG00000182013 | 364.9713195 | 180.7973791 | 1.012737529  | 0.286705758 | 0.407980189 | PNMA8A     |
| ENSG00000260517 | 13.07165494 | 6.84852864  | 0.933532007  | 0.28674398  | 0.408012232 | AC009093.2 |
| ENSG00000160062 | 153.5513982 | 121.9394854 | 0.333712187  | 0.286761652 | 0.408015031 | ZBTB8A     |
| ENSG00000126456 | 1210.686672 | 1434.43049  | -0.244517552 | 0.286907874 | 0.408200727 | IRF3       |
| ENSG00000167981 | 82.45381435 | 64.32761801 | 0.355003625  | 0.28713808  | 0.408505885 | ZNF597     |
| ENSG00000228606 | 17.21241406 | 10.3230299  | 0.73467654   | 0.287569842 | 0.409097742 | AL139011.1 |
| ENSG00000183624 | 636.7773873 | 799.2183446 | -0.328134211 | 0.287606792 | 0.409127905 | HMCES      |
| ENSG00000137757 | 7.848551852 | 2.975038428 | 1.413088119  | 0.2876382   | 0.409150182 | CASP5      |
| ENSG00000272360 | 3.299970955 | 1.080229524 | 1.61622811   | 0.287687476 | 0.409197871 | AC116036.2 |
| ENSG00000114638 | 0.925067711 | 7.402338167 | -3.007052199 | 0.287759447 | 0.40927551  | UPK1B      |
| ENSG00000267858 | 52.25005049 | 39.28506845 | 0.410198947  | 0.287773566 | 0.40927551  | MZF1-AS1   |
| ENSG00000187231 | 740.3013644 | 892.2691192 | -0.269604544 | 0.288038999 | 0.409630589 | SESTD1     |
| ENSG00000244479 | 1.541779519 | 5.522718069 | -1.843685739 | 0.288055078 | 0.409631034 | OR2A1-AS1  |
| ENSG00000090060 | 2774.898228 | 3253.331688 | -0.229418364 | 0.288141979 | 0.409732186 | PAPOLA     |
| ENSG00000251676 | 0           | 3.02822925  | -4.182829964 | 0.288186245 | 0.40973484  | SNHG27     |
| ENSG00000163161 | 1275.255318 | 1070.784294 | 0.252183557  | 0.288187257 | 0.40973484  | ERCC3      |
| ENSG00000263050 | 28.71589159 | 18.23415911 | 0.648456132  | 0.288191157 | 0.40973484  | AC090617.5 |
| ENSG00000101843 | 774.4028488 | 910.0516259 | -0.233111826 | 0.288268521 | 0.409822404 | PSMD10     |
| ENSG00000170632 | 247.0973643 | 307.576193  | -0.316520374 | 0.288313459 | 0.409863863 | ARMC10     |
| ENSG00000186806 | 131.4271712 | 94.1320922  | 0.481999992  | 0.288340983 | 0.409880564 | VSIG10L    |
| ENSG00000258773 | 0           | 2.038888596 | -3.614488039 | 0.288378421 | 1           | AC087636.1 |
| ENSG00000274354 | 0           | 2.038888596 | -3.614488039 | 0.288378421 | 1           | AC105105.3 |
| ENSG00000143494 | 44.95964461 | 28.89109039 | 0.638128561  | 0.288590981 | 0.410213496 | VASH2      |
| ENSG00000257913 | 8.465192389 | 16.05936316 | -0.920333974 | 0.288668209 | 0.41029872  | DDN-AS1    |
| ENSG00000286482 | 11.57779916 | 5.207601518 | 1.140287062  | 0.288682522 | 0.41029872  | AL117344.2 |
| ENSG00000171169 | 165.3204651 | 200.1872797 | -0.276425479 | 0.288723349 | 0.410319723 | NAIF1      |
| ENSG00000224251 | 0.908699006 | 2.822786395 | -1.642488049 | 0.288728885 | 0.410319723 | AL391427.1 |
| ENSG00000228008 | 3.331454716 | 0.743759607 | 2.18347425   | 0.288806548 | 0.410407642 | AC105935.1 |
| ENSG00000160318 | 30.47422521 | 18.58581783 | 0.71615109   | 0.288895348 | 0.410511378 | CLDND2     |
| ENSG00000124257 | 15.67181692 | 9.445803084 | 0.736796615  | 0.289133633 | 0.410827504 | NEURL2     |
| ENSG00000260211 | 0.308355904 | 1.753169357 | -2.43591338  | 0.289246702 | 1           | AC139426.1 |
| ENSG00000242853 | 0.307102255 | 1.753169357 | -2.435911393 | 0.289306789 | 1           | RN7SL749P  |
| ENSG00000182636 | 1216.924734 | 687.5941397 | 0.823379043  | 0.289318149 | 0.4110672   | NDN        |
| ENSG00000186446 | 2.127007565 | 4.963176346 | -1.229049617 | 0.289639961 | 0.411501932 | ZNF501     |
| ENSG00000143153 | 387.8678248 | 518.2989963 | -0.418371986 | 0.289672467 | 0.41152561  | ATP1B1     |

|                 |             |             |              |             |             |            |
|-----------------|-------------|-------------|--------------|-------------|-------------|------------|
| ENSG00000228808 | 0.293240848 | 1.753169357 | -2.435889383 | 0.289974128 | 1           | HMGB3P4    |
| ENSG00000226650 | 0.293240848 | 1.753169357 | -2.435889383 | 0.289974128 | 1           | KIF4B      |
| ENSG00000011052 | 0.293240848 | 1.753169357 | -2.435889383 | 0.289974128 | 1           | NME1-NME2  |
| ENSG00000228049 | 13.85316526 | 23.68947785 | -0.770192904 | 0.289990971 | 0.41193823  | POLR2J2    |
| ENSG00000272562 | 8.172022812 | 3.995060664 | 1.038824488  | 0.290006151 | 0.41193823  | AL512343.2 |
| ENSG00000287377 | 2.111892509 | 5.104815894 | -1.266395177 | 0.290010475 | 0.41193823  | AC090948.4 |
| ENSG00000165832 | 308.7775347 | 392.3389526 | -0.346289247 | 0.290055703 | 0.411979949 | TRUB1      |
| novel.151       | 10.51286373 | 5.207473124 | 1.029759085  | 0.290210912 | 0.412177866 | -          |
| ENSG00000196972 | 70.97318723 | 49.67074578 | 0.512043959  | 0.290276956 | 0.412249131 | SMIM10L2B  |
| ENSG00000281100 | 4.267876537 | 1.487519214 | 1.539681578  | 0.290334473 | 0.412306655 | AC105749.1 |
| ENSG00000226312 | 25.46843169 | 15.16219565 | 0.75117707   | 0.290364156 | 0.412306655 | CFLAR-AS1  |
| ENSG00000280211 | 32.49779249 | 21.94106039 | 0.568679244  | 0.290365069 | 0.412306655 | AC106886.4 |
| ENSG00000131408 | 1519.793547 | 1870.836163 | -0.299611212 | 0.290510215 | 0.412476992 | NR1H2      |
| ENSG00000050327 | 4.222531369 | 9.336129388 | -1.151333531 | 0.290516781 | 0.412476992 | ARHGEF5    |
| ENSG00000204852 | 547.6685292 | 647.424345  | -0.241479247 | 0.29066778  | 0.41266883  | TCTN1      |
| ENSG00000112659 | 654.3042436 | 806.0524635 | -0.300539866 | 0.290711459 | 0.412708291 | CUL9       |
| ENSG00000127530 | 2.991615051 | 0.672939833 | 2.112973796  | 0.29073803  | 0.412723459 | AC005255.1 |
| ENSG00000278153 | 2.709728314 | 0.743759607 | 1.892645941  | 0.290849475 | 0.412859106 | AL121782.1 |
| ENSG00000254152 | 3.518890171 | 0           | 4.149963297  | 0.29093358  | 0.412944261 | PPIAP84    |
| ENSG00000010818 | 571.5472579 | 723.8375461 | -0.340390139 | 0.290941253 | 0.412944261 | HIVEP2     |
| ENSG00000159176 | 8437.834991 | 5903.213996 | 0.515336404  | 0.291034071 | 0.413053436 | CSRP1      |
| ENSG00000157796 | 682.3319375 | 541.102771  | 0.334925515  | 0.291098222 | 0.413121915 | WDR19      |
| ENSG00000286193 | 7.52758819  | 13.8399811  | -0.879449897 | 0.291231602 | 0.41328863  | AC025449.2 |
| ENSG00000162517 | 1088.8554   | 1258.032309 | -0.208527526 | 0.291299046 | 0.413361763 | PEF1       |
| ENSG00000268107 | 0.293240848 | 2.221822211 | -2.765653546 | 0.291324622 | 1           | AC003005.1 |
| ENSG00000228261 | 2.094270155 | 5.951361125 | -1.507237028 | 0.291331188 | 0.413384795 | ITPRIP-AS1 |
| ENSG00000141664 | 390.1728248 | 289.075425  | 0.433516013  | 0.291445352 | 0.413511406 | ZCCHC2     |
| ENSG00000215817 | 97.02537985 | 74.57340679 | 0.382842913  | 0.291452249 | 0.413511406 | ZC3H11B    |
| ENSG00000260924 | 26.33339518 | 37.50712528 | -0.513663689 | 0.291501852 | 0.413559199 | LINC01311  |
| ENSG00000229413 | 56.64844974 | 35.02397246 | 0.698174959  | 0.291518092 | 0.413559657 | AC018638.1 |
| ENSG00000182600 | 54.67850498 | 34.93321199 | 0.649770156  | 0.291537212 | 0.4135642   | SNORC      |
| ENSG00000106028 | 564.6744451 | 742.8004782 | -0.395428392 | 0.291572013 | 0.41358525  | SSBP1      |
| ENSG00000286262 | 3.005476459 | 0.774441189 | 2.007381388  | 0.291583889 | 0.41358525  | BX322557.2 |
| ENSG00000167779 | 7391.863528 | 4489.606198 | 0.719314768  | 0.291606476 | 0.413594708 | IGFBP6     |
| ENSG00000132563 | 460.7402974 | 341.6992611 | 0.431858621  | 0.291761248 | 0.413791636 | REEP2      |
| ENSG00000168159 | 143.8554603 | 241.127072  | -0.745340845 | 0.291807835 | 0.413835118 | RNF187     |
| ENSG00000164776 | 32.30276387 | 23.2551026  | 0.47348766   | 0.291891048 | 0.413930534 | PHKG1      |
| ENSG00000007952 | 13.89224218 | 8.601697997 | 0.691820793  | 0.292111867 | 0.414221068 | NOX1       |
| ENSG00000259710 | 1.524157165 | 0           | 2.940566483  | 0.292327546 | 1           | NUTF2P6    |
| ENSG00000167414 | 1.524157165 | 0           | 2.940566483  | 0.292327546 | 1           | AC093503.1 |
| ENSG00000286542 | 1.524157165 | 0           | 2.940566483  | 0.292327546 | 1           | AC124242.3 |
| ENSG00000249955 | 1.524157165 | 0           | 2.940566483  | 0.292327546 | 1           | AC084866.1 |
| ENSG00000205444 | 1.524157165 | 0           | 2.940566483  | 0.292327546 | 1           | AL034376.1 |
| ENSG00000237586 | 1.524157165 | 0           | 2.940566483  | 0.292327546 | 1           | AC090192.1 |
| ENSG00000256674 | 1.524157165 | 0           | 2.940566483  | 0.292327546 | 1           | AC020549.1 |
| ENSG00000110195 | 3.699017196 | 0.743759607 | 2.329935387  | 0.292333228 | 0.414497306 | FOLR1      |
| ENSG00000270720 | 2.461832635 | 0.387220594 | 2.669444414  | 0.29233858  | 0.414497306 | AC104785.1 |
| ENSG00000188095 | 4.926172567 | 11.89429312 | -1.275041439 | 0.292433121 | 0.414608727 | MESP2      |
| ENSG00000155313 | 951.4375914 | 840.1278883 | 0.179500116  | 0.29247804  | 0.414648603 | USP25      |
| ENSG00000196549 | 2470.417003 | 4774.721472 | -0.950656761 | 0.292505399 | 0.414648603 | MME        |
| ENSG00000122299 | 1112.366396 | 1318.533685 | -0.245553288 | 0.292513132 | 0.414648603 | ZC3H7A     |

|                 |             |             |              |             |             |              |
|-----------------|-------------|-------------|--------------|-------------|-------------|--------------|
| ENSG00000279161 | 1.186824798 | 5.390406738 | -2.169383849 | 0.292525086 | 0.414648603 | AC093503.4   |
| ENSG00000270426 | 5.713951124 | 2.476859868 | 1.19986192   | 0.292552738 | 0.414665176 | AC099343.2   |
| ENSG00000260266 | 0.615458159 | 2.772035718 | -2.188578823 | 0.292748555 | 0.414920092 | PPIAP46      |
| ENSG00000144233 | 703.3061785 | 836.7495758 | -0.250383876 | 0.292768849 | 0.414926221 | AMMECR1L     |
| ENSG00000200152 | 1.835020366 | 5.289033778 | -1.535398947 | 0.293074094 | 0.415326706 | RNU6-216P    |
| ENSG00000232871 | 13.9149504  | 8.010190423 | 0.803276128  | 0.2930834   | 0.415326706 | SEC1P        |
| ENSG00000272909 | 7.580455251 | 3.068367442 | 1.282512201  | 0.293130788 | 0.415371203 | AL122035.2   |
| ENSG00000279491 | 6.272710004 | 14.49858403 | -1.201808967 | 0.293180776 | 0.415419379 | AP003733.4   |
| ENSG00000163116 | 3.341555177 | 1.10029862  | 1.616116676  | 0.293257405 | 0.415505298 | STPG2        |
| ENSG00000008256 | 2008.359011 | 1440.744496 | 0.479017179  | 0.293356193 | 0.4156226   | CYTH3        |
| ENSG00000223653 | 5.486185096 | 12.44463502 | -1.188769143 | 0.29344928  | 0.415731814 | AL078459.1   |
| ENSG00000237350 | 18.53903531 | 26.81090772 | -0.530633919 | 0.293568182 | 0.415877587 | CDC42P6      |
| ENSG00000092020 | 363.3451054 | 427.1972355 | -0.23360829  | 0.293739942 | 0.416098218 | PPP2R3C      |
| ENSG00000058673 | 9.235348592 | 4.402350354 | 1.081608     | 0.293788666 | 0.41614455  | ZC3H11A      |
| ENSG00000160183 | 2.15473038  | 0           | 3.439802386  | 0.293821416 | 1           | TMPRSS3      |
| ENSG00000143556 | 2.15473038  | 0           | 3.439802386  | 0.293821416 | 1           | S100A7       |
| ENSG00000277984 | 2.15473038  | 0           | 3.439802386  | 0.293821416 | 1           | AP001264.1   |
| ENSG00000286792 | 2.15473038  | 0           | 3.439802386  | 0.293821416 | 1           | AC005703.7   |
| ENSG00000276772 | 2.15473038  | 0           | 3.439802386  | 0.293821416 | 1           | AC025271.4   |
| ENSG00000279281 | 2.153476731 | 0           | 3.439014157  | 0.29398728  | 1           | AC015883.1   |
| ENSG00000285698 | 2.153476731 | 0           | 3.439014157  | 0.29398728  | 1           | AL049825.1   |
| ENSG00000230817 | 2.153476731 | 0           | 3.439014157  | 0.29398728  | 1           | LINC01362    |
| ENSG00000263482 | 2.153476731 | 0           | 3.439014157  | 0.29398728  | 1           | ANTXRLP1     |
| ENSG00000256553 | 2.153476731 | 0           | 3.439014157  | 0.29398728  | 1           | TRAV1-2      |
| ENSG00000180329 | 402.3534744 | 468.3979523 | -0.219744202 | 0.294171893 | 0.416664665 | CCDC43       |
| ENSG00000279805 | 5.098492965 | 2.160459047 | 1.24359522   | 0.294205861 | 0.416690061 | Z95114.3     |
| ENSG00000107295 | 1.218308559 | 3.852265241 | -1.670380746 | 0.29436432  | 0.416891763 | SH3GL2       |
| ENSG00000226519 | 2.461832635 | 0.336469917 | 2.669467478  | 0.29440905  | 0.416932384 | LINC00390    |
| ENSG00000161649 | 2.463086283 | 0.387220594 | 2.670133426  | 0.294452748 | 0.416971541 | CD300LG      |
| ENSG00000198354 | 3.994836612 | 0.672939833 | 2.53803548   | 0.294486164 | 0.416996131 | DCAF12L2     |
| ENSG00000205155 | 264.0107675 | 319.8670349 | -0.277719059 | 0.294711101 | 0.417289544 | PSENIEN      |
| ENSG00000236710 | 11.59639043 | 4.832149285 | 1.25376424   | 0.294744941 | 0.417289544 | AC108448.2   |
| ENSG00000157216 | 929.7436636 | 738.8928381 | 0.331366823  | 0.294755877 | 0.417289544 | SSBP3        |
| ENSG00000247708 | 63.45018671 | 48.72385507 | 0.378425566  | 0.294757619 | 0.417289544 | STX18-AS1    |
| ENSG00000226580 | 1.510295757 | 0           | 2.928958021  | 0.29488247  | 1           | RPL39P40     |
| ENSG00000053108 | 1.510295757 | 0           | 2.928958021  | 0.29488247  | 1           | FSTL4        |
| ENSG00000262098 | 1.510295757 | 0           | 2.928958021  | 0.29488247  | 1           | AC127496.2   |
| ENSG00000228470 | 1.510295757 | 0           | 2.928958021  | 0.29488247  | 1           | AL929236.1   |
| ENSG00000225731 | 1.510295757 | 0           | 2.928958021  | 0.29488247  | 1           | AP001627.1   |
| novel.209       | 1.510295757 | 0           | 2.928958021  | 0.29488247  | 1           | -            |
| ENSG00000203489 | 1.510295757 | 0           | 2.928958021  | 0.29488247  | 1           | HMGB1P39     |
| ENSG00000287870 | 1.510295757 | 0           | 2.928958021  | 0.29488247  | 1           | AC093433.2   |
| ENSG00000288070 | 1.509042109 | 0           | 2.927910596  | 0.295114448 | 1           | AC016902.1   |
| ENSG00000237154 | 1.509042109 | 0           | 2.927910596  | 0.295114448 | 1           | MCFD2P1      |
| ENSG00000258199 | 1.509042109 | 0           | 2.927910596  | 0.295114448 | 1           | AC073896.4   |
| ENSG00000270248 | 1.509042109 | 0           | 2.927910596  | 0.295114448 | 1           | AC011468.4   |
| ENSG00000243915 | 1.509042109 | 0           | 2.927910596  | 0.295114448 | 1           | THAP12P2     |
| ENSG00000251201 | 1.509042109 | 0           | 2.927910596  | 0.295114448 | 1           | TMED7-TICAM2 |
| ENSG00000213279 | 1.509042109 | 0           | 2.927910596  | 0.295114448 | 1           | Z97192.2     |
| ENSG00000232837 | 1.509042109 | 0           | 2.927910596  | 0.295114448 | 1           | LINC01700    |
| ENSG00000225636 | 2.654282684 | 0.356539013 | 2.783280913  | 0.295119343 | 0.417778872 | HNRNPA3P15   |

|                 |             |             |              |             |             |             |
|-----------------|-------------|-------------|--------------|-------------|-------------|-------------|
| ENSG00000157510 | 749.555946  | 551.6957581 | 0.442675539  | 0.295211761 | 0.417886933 | AFAP1L1     |
| ENSG00000176087 | 1198.006241 | 1386.911692 | -0.21138976  | 0.295236897 | 0.417899745 | SLC35A4     |
| ENSG00000248610 | 0.616711807 | 3.424906455 | -2.487918411 | 0.295601565 | 0.418393128 | HSPA8P4     |
| ENSG00000138378 | 39.47213459 | 65.3068129  | -0.725472324 | 0.295660649 | 0.418453959 | STAT4       |
| ENSG00000259397 | 0.879722543 | 3.515795324 | -1.987100257 | 0.29572865  | 0.418527403 | AC021231.2  |
| ENSG00000203325 | 1.203193503 | 3.566546002 | -1.566067294 | 0.295836909 | 0.41865781  | AL445248.1  |
| ENSG00000168538 | 672.3845672 | 804.8561043 | -0.259613465 | 0.295901648 | 0.418726618 | TRAPPC11    |
| ENSG00000178217 | 2.460578986 | 0.356539013 | 2.668818393  | 0.295957181 | 0.418782394 | SH2D4B      |
| ENSG00000221947 | 0.586481695 | 2.51699806  | -2.080483568 | 0.296015605 | 0.418842253 | XKR9        |
| ENSG00000241030 | 4.845582691 | 1.823989131 | 1.418563757  | 0.29617812  | 0.419049379 | RPL29P24    |
| ENSG00000179152 | 601.8559577 | 510.1189718 | 0.238000129  | 0.29641291  | 0.419358735 | TCAIM       |
| ENSG00000235703 | 123.4625438 | 80.00634468 | 0.62781601   | 0.296479805 | 0.419430537 | LINC00894   |
| novel.952       | 165.5052799 | 307.9526731 | -0.895835567 | 0.296591369 | 0.419549045 | -           |
| ENSG00000178803 | 8.487900608 | 15.6804433  | -0.882854717 | 0.29659587  | 0.419549045 | ADORA2A-AS1 |
| ENSG00000185115 | 11.50473118 | 6.696276607 | 0.771137014  | 0.29669793  | 0.419670564 | NSMCE3      |
| ENSG00000266983 | 5.691242904 | 11.49414829 | -1.010630559 | 0.296833528 | 0.419839506 | AC011444.1  |
| ENSG00000235508 | 6.037422084 | 10.33364238 | -0.776812431 | 0.296894219 | 0.419902487 | RPS2P7      |
| ENSG00000100104 | 194.9217067 | 238.1454289 | -0.289139596 | 0.296936214 | 0.419928748 | SRRD        |
| ENSG00000196437 | 155.7899812 | 124.8608663 | 0.317717145  | 0.296945112 | 0.419928748 | ZNF569      |
| ENSG00000159685 | 202.3887912 | 250.9935008 | -0.31095803  | 0.297034828 | 0.420032759 | CHCHD6      |
| ENSG00000172671 | 90.26224909 | 114.3224234 | -0.340731539 | 0.297214418 | 0.420263839 | ZFAND4      |
| ENSG00000163820 | 762.8117299 | 873.312169  | -0.195380479 | 0.29725224  | 0.420287336 | FYCO1       |
| ENSG00000235244 | 1.847628125 | 5.196860638 | -1.491714596 | 0.297263388 | 0.420287336 | DANT2       |
| ENSG00000179097 | 7.513726783 | 3.311508345 | 1.194595822  | 0.297433541 | 0.420451141 | HTR1F       |
| ENSG00000288060 | 3.391914941 | 0           | 4.095108439  | 0.29746619  | 0.420451141 | AL355338.2  |
| ENSG00000168671 | 3.391914941 | 0           | 4.095108439  | 0.29746619  | 0.420451141 | UGT3A2      |
| ENSG00000143297 | 3.391914941 | 0           | 4.095108439  | 0.29746619  | 0.420451141 | FCRL5       |
| ENSG00000231419 | 3.391914941 | 0           | 4.095108439  | 0.29746619  | 0.420451141 | LINC00689   |
| ENSG00000273096 | 2.752566185 | 6.553352791 | -1.251906114 | 0.297476343 | 0.420451141 | AL021707.8  |
| ENSG00000249850 | 3.311325065 | 1.060160428 | 1.63468684   | 0.297641652 | 0.420659513 | KRT18P31    |
| ENSG00000137764 | 293.8941375 | 357.0406315 | -0.280187254 | 0.297656152 | 0.420659513 | MAP2K5      |
| ENSG00000132510 | 558.9913102 | 768.4278993 | -0.458723241 | 0.297730012 | 0.420741009 | KDM6B       |
| ENSG00000286458 | 4.764921544 | 1.793307549 | 1.413033465  | 0.297761259 | 0.42076228  | AC083870.1  |
| ENSG00000106692 | 539.2185391 | 677.9969199 | -0.330259343 | 0.297937683 | 0.420983276 | FKTN        |
| ENSG00000227632 | 19.48401921 | 9.396336676 | 1.046134804  | 0.297950059 | 0.420983276 | AC018804.1  |
| ENSG00000234777 | 3.378124804 | 0           | 4.089384958  | 0.298153466 | 0.421224861 | LINC02529   |
| ENSG00000260518 | 3.378124804 | 0           | 4.089384958  | 0.298153466 | 0.421224861 | BMS1P8      |
| ENSG00000266289 | 5.118622616 | 2.129777466 | 1.259706081  | 0.298243128 | 0.421328622 | AC012213.3  |
| ENSG00000140876 | 32.8542856  | 23.1854387  | 0.499335913  | 0.298337036 | 0.421438371 | AC092724.1  |
| ENSG00000280055 | 0.601596751 | 2.793260689 | -2.216915012 | 0.298381543 | 0.421478328 | TMEM75      |
| ENSG00000111249 | 2.155984028 | 0           | 3.440621883  | 0.298475221 | 1           | CUX2        |
| ENSG00000236209 | 2.155984028 | 0           | 3.440621883  | 0.298475221 | 1           | AC104135.1  |
| ENSG00000253223 | 2.155984028 | 0           | 3.440621883  | 0.298475221 | 1           | AC110998.1  |
| novel.1088      | 2.155984028 | 0           | 3.440621883  | 0.298475221 | 1           | -           |
| ENSG00000179304 | 14.62485984 | 23.04123062 | -0.653016738 | 0.298537968 | 0.421676359 | FAM156B     |
| ENSG00000213514 | 6.553343093 | 2.904218654 | 1.183833992  | 0.298564358 | 0.421690709 | AL731556.1  |
| ENSG00000288025 | 4.821620823 | 1.762625967 | 1.442153516  | 0.298733033 | 0.421906009 | AC093849.4  |
| ENSG00000065600 | 186.0096434 | 234.3043241 | -0.332549821 | 0.298794958 | 0.421970527 | TMEM206     |
| ENSG00000267119 | 2.40137241  | 0.387220594 | 2.637012386  | 0.298864259 | 0.422015351 | RPL10P15    |
| ENSG00000175213 | 210.6270874 | 262.3723244 | -0.31698135  | 0.298864615 | 0.422015351 | ZNF408      |
| ENSG00000147274 | 2936.893706 | 3384.087766 | -0.204570129 | 0.298882727 | 0.422015351 | RBMX        |

|                 |             |             |              |             |             |            |
|-----------------|-------------|-------------|--------------|-------------|-------------|------------|
| ENSG00000256061 | 13.97283206 | 7.24764599  | 0.932978493  | 0.29889167  | 0.422015351 | DNAAF4     |
| ENSG00000185002 | 2.152223082 | 0           | 3.43825349   | 0.298920285 | 1           | RFX6       |
| ENSG00000188730 | 2.152223082 | 0           | 3.43825349   | 0.298920285 | 1           | VWC2       |
| ENSG00000211943 | 2.152223082 | 0           | 3.43825349   | 0.298920285 | 1           | IGHV3-15   |
| ENSG00000273618 | 3.253372138 | 0.693008929 | 2.213977688  | 0.298924704 | 0.422039058 | AL135999.2 |
| ENSG00000183444 | 5.700089716 | 2.527610546 | 1.179695811  | 0.298982498 | 0.422097716 | OR7E38P    |
| ENSG00000152219 | 544.707058  | 460.5076969 | 0.242177066  | 0.299035321 | 0.422149353 | ARL14EP    |
| ENSG00000204839 | 9.799406802 | 4.586568238 | 1.086519206  | 0.29907238  | 0.422160628 | MROH6      |
| ENSG00000166024 | 274.8543675 | 337.9871883 | -0.297721959 | 0.299075806 | 0.422160628 | R3HCC1L    |
| ENSG00000253522 | 217.1852171 | 431.2522085 | -0.989376772 | 0.299151737 | 0.422244867 | MIR3142HG  |
| novel.617       | 2.111892509 | 5.074134312 | -1.259908016 | 0.299276428 | 0.422397918 | -          |
| ENSG00000249740 | 44.53857433 | 65.20325658 | -0.547291809 | 0.299375204 | 0.422499076 | OSMR-AS1   |
| ENSG00000140006 | 198.0277171 | 239.8701812 | -0.277063945 | 0.299380624 | 0.422499076 | WDR89      |
| ENSG00000186318 | 1050.399593 | 901.3618172 | 0.220468804  | 0.299420202 | 0.422523256 | BACE1      |
| ENSG00000141959 | 4304.548528 | 5039.297733 | -0.227297913 | 0.299430283 | 0.422523256 | PFKL       |
| ENSG00000243518 | 2.113146158 | 0           | 3.413357823  | 0.299570378 | 1           | AC108729.2 |
| ENSG00000252097 | 2.113146158 | 0           | 3.413357823  | 0.299570378 | 1           | RNU6-346P  |
| ENSG00000274885 | 2.113146158 | 0           | 3.413357823  | 0.299570378 | 1           | AC087241.3 |
| ENSG00000243746 | 2.113146158 | 0           | 3.413357823  | 0.299570378 | 1           | EEF1A1P10  |
| ENSG00000253398 | 2.113146158 | 0           | 3.413357823  | 0.299570378 | 1           | AC021733.1 |
| ENSG00000285820 | 2.113146158 | 0           | 3.413357823  | 0.299570378 | 1           | AL157829.1 |
| ENSG00000236466 | 2.113146158 | 0           | 3.413357823  | 0.299570378 | 1           | AL035670.1 |
| ENSG00000168828 | 2.113146158 | 0           | 3.413357823  | 0.299570378 | 1           | OR13J1     |
| ENSG00000230665 | 2.113146158 | 0           | 3.413357823  | 0.299570378 | 1           | THAP12P1   |
| ENSG00000228826 | 2.113146158 | 0           | 3.413357823  | 0.299570378 | 1           | AL592494.1 |
| ENSG00000230147 | 2.113146158 | 0           | 3.413357823  | 0.299570378 | 1           | AL158071.2 |
| ENSG00000242571 | 0.586481695 | 3.332733316 | -2.48739544  | 0.300082169 | 0.42338835  | RPL21P11   |
| ENSG00000187783 | 3.270994492 | 0.743759607 | 2.159517633  | 0.300093471 | 0.42338835  | TMEM72     |
| ENSG00000114021 | 750.5189079 | 894.6644315 | -0.253755417 | 0.300093757 | 0.42338835  | NIT2       |
| ENSG00000182768 | 780.1704065 | 615.1466067 | 0.342419097  | 0.300108535 | 0.42338835  | NGRN       |
| ENSG00000259986 | 2.40137241  | 0.356539013 | 2.637004496  | 0.300155629 | 0.423413941 | AC103876.1 |
| ENSG00000107443 | 209.0910345 | 251.7779122 | -0.268760252 | 0.300159269 | 0.423413941 | CCNJ       |
| ENSG00000166407 | 2.421502061 | 0.356539013 | 2.647864639  | 0.300198958 | 0.423446937 | LMO1       |
| ENSG00000287338 | 2.108131562 | 0           | 3.410147782  | 0.300241533 | 1           | AL929091.1 |
| ENSG00000260469 | 2.108131562 | 0           | 3.410147782  | 0.300241533 | 1           | INSYN1-AS1 |
| ENSG00000227201 | 2.108131562 | 0           | 3.410147782  | 0.300241533 | 1           | CNN2P1     |
| ENSG00000134007 | 2.108131562 | 0           | 3.410147782  | 0.300241533 | 1           | ADAM20     |
| ENSG00000270876 | 2.108131562 | 0           | 3.410147782  | 0.300241533 | 1           | ZNF30-AS1  |
| ENSG00000268738 | 2.108131562 | 0           | 3.410147782  | 0.300241533 | 1           | HSFX2      |
| ENSG00000274973 | 2.108131562 | 0           | 3.410147782  | 0.300241533 | 1           | BSNDP2     |
| ENSG00000264534 | 2.108131562 | 0           | 3.410147782  | 0.300241533 | 1           | MIR378B    |
| ENSG00000271964 | 6.912130031 | 2.822786395 | 1.285537033  | 0.300436504 | 0.423759002 | AC090948.1 |
| ENSG00000186094 | 2.406387005 | 0.336469917 | 2.639703361  | 0.30045481  | 0.423761816 | AGBL4      |
| ENSG00000173517 | 1337.905014 | 1722.325641 | -0.364536681 | 0.300643192 | 0.424004493 | PEAK1      |
| ENSG00000143924 | 853.5275009 | 1093.591035 | -0.357852092 | 0.300760222 | 0.424146519 | EML4       |
| ENSG00000149488 | 5.102253911 | 2.089639274 | 1.272700926  | 0.300810721 | 0.424194711 | TMC2       |
| ENSG00000270641 | 0.907445357 | 3.688116453 | -2.017941419 | 0.300918708 | 0.424323959 | TSIX       |
| ENSG00000162191 | 1904.880087 | 2237.113198 | -0.231805989 | 0.300943689 | 0.424336154 | UBXN1      |
| ENSG00000071282 | 310.2939128 | 183.5431811 | 0.756575043  | 0.300986482 | 0.424373463 | LMCD1      |
| ENSG00000119660 | 2.421502061 | 0.336469917 | 2.64786449   | 0.301036263 | 0.42440902  | DPPA5P4    |
| ENSG00000241627 | 24.25800103 | 35.17203336 | -0.54105718  | 0.301044372 | 0.42440902  | UBQLN4P1   |

|                 |             |             |              |             |             |            |
|-----------------|-------------|-------------|--------------|-------------|-------------|------------|
| ENSG00000161547 | 2494.661747 | 2054.528529 | 0.279937161  | 0.301079975 | 0.424436181 | SRSF2      |
| novel.920       | 8.296704208 | 2.323323566 | 1.855784264  | 0.301117476 | 0.424466017 | -          |
| ENSG00000126231 | 5.160206839 | 9.305319412 | -0.852726802 | 0.30116012  | 0.424485577 | PROZ       |
| ENSG00000008300 | 121.2825267 | 192.8735058 | -0.668214637 | 0.301164029 | 0.424485577 | CELSR3     |
| ENSG00000148357 | 11.82945579 | 6.267761946 | 0.903108497  | 0.301248774 | 0.42458199  | HMCN2      |
| ENSG00000224746 | 5.529022967 | 1.762625967 | 1.638660483  | 0.30128106  | 0.424598926 | AC015987.1 |
| ENSG00000215481 | 4.860697747 | 1.345879667 | 1.823028324  | 0.301293476 | 0.424598926 | BCRP3      |
| ENSG00000271888 | 6.919651924 | 12.55418032 | -0.849440824 | 0.301353738 | 0.424653612 | AL136162.1 |
| ENSG00000279412 | 6.494136517 | 15.14097068 | -1.215972268 | 0.301364971 | 0.424653612 | AC020763.3 |
| ENSG00000157625 | 574.835832  | 457.8993308 | 0.328771445  | 0.301419015 | 0.424706731 | TAB3       |
| ENSG00000149300 | 2.098031101 | 0           | 3.403634745  | 0.301531632 | 1           | C11orf52   |
| ENSG00000157119 | 2.098031101 | 0           | 3.403634745  | 0.301531632 | 1           | KLHL40     |
| ENSG00000250900 | 2.098031101 | 0           | 3.403634745  | 0.301531632 | 1           | AC008443.6 |
| ENSG00000214510 | 2.098031101 | 0           | 3.403634745  | 0.301531632 | 1           | SPINK13    |
| ENSG00000238963 | 2.098031101 | 0           | 3.403634745  | 0.301531632 | 1           | RF00096    |
| ENSG00000152969 | 2.098031101 | 0           | 3.403634745  | 0.301531632 | 1           | JAKMIP1    |
| ENSG00000226302 | 2.098031101 | 0           | 3.403634745  | 0.301531632 | 1           | AC122683.1 |
| ENSG00000234545 | 291.5692105 | 232.9312301 | 0.323739495  | 0.301543376 | 0.424858919 | FAM133B    |
| ENSG00000130414 | 1803.282392 | 2128.379235 | -0.239110464 | 0.301575423 | 0.42488103  | NDUFA10    |
| ENSG00000212541 | 9.308416575 | 4.319762219 | 1.10974246   | 0.301750724 | 0.425104954 | RNU6-510P  |
| ENSG00000153879 | 840.8917194 | 718.4689507 | 0.226590807  | 0.301773391 | 0.425113836 | CEBPG      |
| ENSG00000266913 | 1.817398012 | 0.387220594 | 2.233687524  | 0.301781365 | 1           | LINC01841  |
| ENSG00000272582 | 7.163786657 | 2.91483114  | 1.306464774  | 0.301839231 | 0.425175281 | AL031587.3 |
| ENSG00000278918 | 16.49484018 | 25.86298953 | -0.646200785 | 0.30185724  | 0.425175281 | AC080112.3 |
| ENSG00000231686 | 41.62998518 | 58.65927919 | -0.492566578 | 0.301866103 | 0.425175281 | Z97180.1   |
| ENSG00000141434 | 3.685227059 | 0.356539013 | 3.25289226   | 0.302039932 | 0.425361189 | MEP1B      |
| ENSG00000262188 | 2.094270155 | 0           | 3.401212699  | 0.302046286 | 1           | LINC01978  |
| ENSG00000248529 | 2.094270155 | 0           | 3.401212699  | 0.302046286 | 1           | AC026746.1 |
| ENSG00000197616 | 2.094270155 | 0           | 3.401212699  | 0.302046286 | 1           | MYH6       |
| ENSG00000286733 | 2.094270155 | 0           | 3.401212699  | 0.302046286 | 1           | AC090164.5 |
| ENSG00000273890 | 2.094270155 | 0           | 3.401212699  | 0.302046286 | 1           | AC034102.9 |
| ENSG00000261603 | 2.094270155 | 0           | 3.401212699  | 0.302046286 | 1           | PRSS46P    |
| ENSG00000229268 | 2.094270155 | 0           | 3.401212699  | 0.302046286 | 1           | PES1P2     |
| ENSG00000205041 | 14.40816319 | 22.31651262 | -0.627724972 | 0.302053912 | 0.425361189 | AC118344.1 |
| ENSG00000042317 | 189.2427868 | 155.6970027 | 0.282680952  | 0.302059854 | 0.425361189 | AL049834.1 |
| ENSG00000113300 | 807.5784269 | 690.4784826 | 0.226093529  | 0.302064533 | 0.425361189 | CNOT6      |
| ENSG00000221916 | 15.69452514 | 9.132998283 | 0.773534555  | 0.302079954 | 0.425361189 | C19orf73   |
| ENSG00000106025 | 52.376199   | 36.59549247 | 0.518646051  | 0.302120883 | 0.425395765 | TSPAN12    |
| ENSG00000234425 | 2.128261214 | 0           | 3.423027477  | 0.302129196 | 1           | AL138930.1 |
| ENSG00000198488 | 2.128261214 | 0           | 3.423027477  | 0.302129196 | 1           | B3GNT6     |
| ENSG00000277568 | 2.128261214 | 0           | 3.423027477  | 0.302129196 | 1           | RF02271    |
| ENSG00000285581 | 2.128261214 | 0           | 3.423027477  | 0.302129196 | 1           | AC091196.1 |
| ENSG00000242488 | 2.128261214 | 0           | 3.423027477  | 0.302129196 | 1           | AF107885.1 |
| ENSG00000287066 | 2.128261214 | 0           | 3.423027477  | 0.302129196 | 1           | AP000962.3 |
| ENSG00000247121 | 33.38148944 | 23.31877751 | 0.517033992  | 0.302141313 | 0.425401477 | AC009126.1 |
| ENSG00000275198 | 8.441301791 | 3.525251935 | 1.252919215  | 0.302234889 | 0.425507399 | AL512791.2 |
| ENSG00000213013 | 2.391271949 | 0.387220594 | 2.631502279  | 0.302255435 | 0.425507399 | RPS15AP36  |
| ENSG00000224401 | 1.215801261 | 3.240688571 | -1.41570355  | 0.302265677 | 0.425507399 | RPL7P57    |
| ENSG00000162341 | 296.2497534 | 222.2148623 | 0.415003141  | 0.302323638 | 0.425565934 | TPCN2      |
| ENSG00000278737 | 1.525410814 | 0           | 2.941668656  | 0.302484027 | 1           | AC013553.4 |
| ENSG00000262497 | 1.525410814 | 0           | 2.941668656  | 0.302484027 | 1           | FAM187B2P  |

|                 |             |             |              |             |             |             |
|-----------------|-------------|-------------|--------------|-------------|-------------|-------------|
| ENSG00000252768 | 1.525410814 | 0           | 2.941668656  | 0.302484027 | 1           | RNU6-856P   |
| ENSG00000261615 | 1.525410814 | 0           | 2.941668656  | 0.302484027 | 1           | LINC01858   |
| ENSG00000266750 | 1.525410814 | 0           | 2.941668656  | 0.302484027 | 1           | MIR4645     |
| ENSG00000271723 | 1.525410814 | 0           | 2.941668656  | 0.302484027 | 1           | MROH7-TTC4  |
| ENSG00000214992 | 1.525410814 | 0           | 2.941668656  | 0.302484027 | 1           | AKAP17BP    |
| ENSG00000204252 | 1.525410814 | 0           | 2.941668656  | 0.302484027 | 1           | HLA-DOA     |
| ENSG00000173801 | 984.6879866 | 700.9820913 | 0.489932775  | 0.302502423 | 0.425794531 | JUP         |
| ENSG00000267284 | 3.685227059 | 0.336469917 | 3.252894234  | 0.302597589 | 0.425871069 | AC022031.2  |
| ENSG00000231638 | 0.616711807 | 2.547679642 | -2.05423299  | 0.302617577 | 0.425871069 | LUARIS      |
| ENSG00000219186 | 4.554849141 | 1.854670712 | 1.316047549  | 0.302620937 | 0.425871069 | FTH1P19     |
| ENSG00000230701 | 2.464339932 | 6.339737595 | -1.37370172  | 0.302628711 | 0.425871069 | FBXW4P1     |
| ENSG00000170684 | 39.60634698 | 55.2614583  | -0.476633762 | 0.302668407 | 0.425871069 | ZNF296      |
| ENSG00000259005 | 2.387511003 | 0.387220594 | 2.629464986  | 0.302671675 | 0.425871069 | AC005479.1  |
| ENSG00000244459 | 16.82618904 | 26.74124382 | -0.669540864 | 0.302677465 | 0.425871069 | AC147067.1  |
| ENSG00000227076 | 4.294345703 | 8.75395003  | -1.028295176 | 0.302687932 | 0.425871069 | AL158166.1  |
| ENSG00000118849 | 306.3622297 | 621.9644575 | -1.021768731 | 0.302729567 | 0.425906584 | RARRES1     |
| ENSG00000251988 | 5.027932279 | 1.518200796 | 1.755456905  | 0.302749134 | 0.42591105  | RNU4ATAC18P |
| ENSG00000109180 | 1914.682413 | 2240.649147 | -0.226959524 | 0.302797724 | 0.425956341 | OCIAD1      |
| ENSG00000103569 | 1.522903516 | 0           | 2.93957469   | 0.302946194 | 1           | AQP9        |
| ENSG00000260011 | 1.522903516 | 0           | 2.93957469   | 0.302946194 | 1           | AC132938.1  |
| ENSG00000272449 | 1.522903516 | 0           | 2.93957469   | 0.302946194 | 1           | AL139246.5  |
| ENSG00000141433 | 1.522903516 | 0           | 2.93957469   | 0.302946194 | 1           | ADCYAP1     |
| ENSG00000229436 | 1.522903516 | 0           | 2.93957469   | 0.302946194 | 1           | AC073850.1  |
| ENSG00000257588 | 1.522903516 | 0           | 2.93957469   | 0.302946194 | 1           | AC025154.2  |
| ENSG00000280060 | 1.522903516 | 0           | 2.93957469   | 0.302946194 | 1           | AL512506.2  |
| ENSG00000274776 | 7.220485935 | 2.792104814 | 1.359999853  | 0.302954875 | 0.426135293 | AC090241.3  |
| ENSG00000163702 | 991.4857669 | 848.39655   | 0.224884185  | 0.302972348 | 0.426135293 | IL17RC      |
| ENSG00000135974 | 431.0104437 | 517.2861193 | -0.262749172 | 0.30297414  | 0.426135293 | C2orf49     |
| ENSG00000287896 | 2.12199297  | 0           | 3.419033332  | 0.302975766 | 1           | AC073548.2  |
| ENSG00000266846 | 2.12199297  | 0           | 3.419033332  | 0.302975766 | 1           | AP001021.3  |
| ENSG00000226995 | 2.12199297  | 0           | 3.419033332  | 0.302975766 | 1           | LINC00658   |
| ENSG00000268433 | 2.12199297  | 0           | 3.419033332  | 0.302975766 | 1           | MTDHP3      |
| ENSG00000160445 | 984.2695397 | 1242.581788 | -0.335934661 | 0.302996579 | 0.426143783 | ZER1        |
| ENSG00000101868 | 352.1146685 | 443.0575768 | -0.331890576 | 0.30306658  | 0.426219163 | POLA1       |
| ENSG00000177699 | 1.817398012 | 0.356539013 | 2.233688513  | 0.303198472 | 1           | AC011944.1  |
| ENSG00000244153 | 1.817398012 | 0.356539013 | 2.233688513  | 0.303198472 | 1           | WWP1P1      |
| ENSG00000170608 | 0.61420451  | 3.362259022 | -2.453838898 | 0.303211206 | 0.426399477 | FOXA3       |
| ENSG00000167992 | 56.94963941 | 41.38275167 | 0.463385536  | 0.303394603 | 0.426634292 | VWCE        |
| ENSG00000230979 | 13.30450684 | 20.56681089 | -0.626225422 | 0.303429783 | 0.426646045 | AC079250.1  |
| ENSG00000181577 | 12.41085161 | 5.899326178 | 1.08120628   | 0.303449535 | 0.426646045 | C6orf223    |
| ENSG00000276791 | 15.85201521 | 9.66070255  | 0.711269048  | 0.303452226 | 0.426646045 | AC092117.1  |
| ENSG00000107968 | 251.4006712 | 181.8928318 | 0.466046121  | 0.303482193 | 0.426665089 | MAP3K8      |
| ENSG00000254703 | 20.83112611 | 11.26277575 | 0.880919813  | 0.30352559  | 0.426675709 | SENCR       |
| ENSG00000285807 | 2.391271949 | 0.356539013 | 2.631490764  | 0.303544451 | 0.426675709 | AL353768.2  |
| ENSG00000210191 | 23.37451754 | 35.1648885  | -0.593590108 | 0.303557728 | 0.426675709 | MT-TL2      |
| novel.977       | 14088.74822 | 5248.885724 | 1.424455619  | 0.303564348 | 0.426675709 | -           |
| ENSG00000286535 | 10.54058654 | 6.023336774 | 0.802149572  | 0.30357186  | 0.426675709 | AC139019.1  |
| ENSG00000200344 | 0.293240848 | 2.120320855 | -2.706117982 | 0.303604737 | 1           | RF00019     |
| ENSG00000276712 | 0.89358395  | 2.934900236 | -1.698073732 | 0.303707395 | 0.426832128 | MIR7111     |
| ENSG00000231742 | 7.661116398 | 14.0335272  | -0.876352884 | 0.303716006 | 0.426832128 | LINC01273   |
| ENSG00000255521 | 8.092615314 | 3.270214277 | 1.312767306  | 0.303771558 | 0.426887108 | AL356215.1  |

|                 |             |             |              |             |             |              |
|-----------------|-------------|-------------|--------------|-------------|-------------|--------------|
| ENSG00000259467 | 0.308355904 | 2.079026788 | -2.681853783 | 0.303796599 | 1           | NDUFAP4P1    |
| ENSG00000273415 | 0.308355904 | 2.079026788 | -2.681853783 | 0.303796599 | 1           | AP000904.1   |
| ENSG00000279532 | 0.308355904 | 2.079026788 | -2.681853783 | 0.303796599 | 1           | AC002094.5   |
| ENSG00000226945 | 0.308355904 | 2.079026788 | -2.681853783 | 0.303796599 | 1           | AC098935.1   |
| ENSG00000268750 | 0.586481695 | 2.567748738 | -2.105360808 | 0.303818481 | 0.426929955 | AC010522.1   |
| ENSG00000170236 | 1.817398012 | 0.336469917 | 2.233689164  | 0.304138826 | 1           | USP50        |
| ENSG00000270228 | 5.683721012 | 1.90542139  | 1.603737479  | 0.304149851 | 0.427372487 | AC079880.1   |
| ENSG00000285531 | 7.766637057 | 14.39135048 | -0.890505739 | 0.304179576 | 0.42739114  | Z83840.1     |
| ENSG00000186019 | 6.67809576  | 12.25096053 | -0.882628902 | 0.304288694 | 0.427518079 | AC021092.1   |
| ENSG00000251323 | 8.325395937 | 3.638521651 | 1.203100794  | 0.304302831 | 0.427518079 | AP003086.1   |
| ENSG00000257696 | 2.459325337 | 0.336469917 | 2.668236804  | 0.304419389 | 0.427616484 | AC010203.2   |
| ENSG00000249006 | 2.459325337 | 0.336469917 | 2.668236804  | 0.304419389 | 0.427616484 | AL136360.1   |
| ENSG00000119402 | 1575.188986 | 1372.081762 | 0.199064046  | 0.304422251 | 0.427616484 | FBXW2        |
| novel.362       | 0.293240848 | 2.079026788 | -2.681829389 | 0.304569953 | 1           | -            |
| ENSG00000248100 | 0.293240848 | 2.079026788 | -2.681829389 | 0.304569953 | 1           | AC087257.1   |
| ENSG00000164574 | 1696.485835 | 1164.242375 | 0.542952077  | 0.304600947 | 0.427844364 | GALNT10      |
| ENSG00000132405 | 319.4219179 | 393.444795  | -0.300599408 | 0.304748807 | 0.428018735 | TBC1D14      |
| ENSG00000125730 | 16203.24373 | 8764.765649 | 0.886503667  | 0.304758038 | 0.428018735 | C3           |
| ENSG00000145349 | 1210.458437 | 984.5323921 | 0.297786488  | 0.304775448 | 0.428020049 | CAMK2D       |
| ENSG00000170482 | 14.1111614  | 8.142501754 | 0.789386975  | 0.304851441 | 0.428103632 | SLC23A1      |
| ENSG00000204086 | 0.61420451  | 2.51699806  | -2.043393392 | 0.304983994 | 0.428266628 | RPA4         |
| ENSG00000168438 | 406.175848  | 466.5796954 | -0.200441328 | 0.30510781  | 0.428417339 | CDC40        |
| novel.748       | 145.7589209 | 86.82539479 | 0.748430316  | 0.305335161 | 0.428713404 | -            |
| ENSG00000124160 | 832.4219282 | 691.9611816 | 0.266474884  | 0.305459308 | 0.428864538 | NCOA5        |
| ENSG00000276633 | 0.307102255 | 2.099095884 | -2.693926751 | 0.305516566 | 1           | AJ011931.1   |
| ENSG00000002586 | 6054.672174 | 7271.303474 | -0.264165424 | 0.305559838 | 0.4289825   | CD99         |
| ENSG00000259459 | 0.923814062 | 3.688116453 | -2.00031354  | 0.305603806 | 0.429006517 | LINC02568    |
| ENSG00000124140 | 8.066146148 | 17.9328187  | -1.146410592 | 0.30560997  | 0.429006517 | SLC12A5      |
| ENSG00000261338 | 46.30464366 | 34.17999577 | 0.442421715  | 0.305694864 | 0.429089484 | AC021016.2   |
| ENSG00000279571 | 2.429095225 | 0.387220594 | 2.651982768  | 0.305702935 | 0.429089484 | AL162426.1   |
| ENSG00000196172 | 54.48329072 | 36.62771511 | 0.568688649  | 0.305718619 | 0.429089484 | ZNF681       |
| ENSG00000263603 | 3.56298169  | 8.497756497 | -1.242429552 | 0.305816311 | 0.429203413 | AC127024.2   |
| ENSG00000063127 | 34.66025823 | 24.49819664 | 0.500948409  | 0.305888145 | 0.42928104  | SLC6A16      |
| ENSG00000102974 | 905.4667177 | 757.0737249 | 0.2579145    | 0.305913447 | 0.429293359 | CTCF         |
| ENSG00000287211 | 3.225649323 | 0           | 4.024537666  | 0.306015286 | 0.429320328 | AL121904.2   |
| ENSG00000249553 | 3.225649323 | 0           | 4.024537666  | 0.306015286 | 0.429320328 | PPP2R2B-IT1  |
| ENSG00000182722 | 3.225649323 | 0           | 4.024537666  | 0.306015286 | 0.429320328 | SEPHS1P1     |
| ENSG00000282870 | 3.225649323 | 0           | 4.024537666  | 0.306015286 | 0.429320328 | FRG1DP       |
| ENSG00000236358 | 3.225649323 | 0           | 4.024537666  | 0.306015286 | 0.429320328 | AL355472.2   |
| ENSG00000235902 | 2.436617117 | 0.356539013 | 2.656024142  | 0.306105948 | 0.429424332 | AC108472.1   |
| ENSG00000113558 | 3106.856472 | 3672.828511 | -0.241502698 | 0.306143231 | 0.429447389 | SKP1         |
| ENSG00000263264 | 7.178901713 | 3.159256312 | 1.176210126  | 0.306155442 | 0.429447389 | AC119396.1   |
| ENSG00000204173 | 12.95582036 | 7.785962742 | 0.728954781  | 0.306397374 | 0.429763546 | LRRC37A5P    |
| ENSG00000164323 | 707.6970677 | 868.5895303 | -0.295902359 | 0.306447408 | 0.429810522 | CFAP97       |
| ENSG00000206885 | 4.178439849 | 1.447381022 | 1.538002027  | 0.306521327 | 0.429888213 | SNORA75      |
| ENSG00000188152 | 28.63515917 | 19.60828021 | 0.544927377  | 0.306535893 | 0.429888213 | NUTM2G       |
| ENSG00000181381 | 668.4993686 | 790.8721719 | -0.242688441 | 0.306604976 | 0.429961888 | DDX60L       |
| ENSG00000213420 | 87.99014574 | 110.9329032 | -0.332171636 | 0.306675348 | 0.430017125 | GPC2         |
| ENSG00000233469 | 7.777991167 | 3.016332495 | 1.386143437  | 0.306677468 | 0.430017125 | ST6GALNAC4P1 |
| ENSG00000255202 | 1.201939854 | 3.801514564 | -1.666931867 | 0.306721037 | 0.430055007 | AL049629.1   |
| ENSG00000100836 | 2437.41794  | 2067.035552 | 0.237904001  | 0.306750644 | 0.430073308 | PABPN1       |



|                 |             |             |              |             |             |              |
|-----------------|-------------|-------------|--------------|-------------|-------------|--------------|
| ENSG00000128683 | 3.933051467 | 0.774441189 | 2.379031455  | 0.306807816 | 0.430130254 | GAD1         |
| ENSG00000279339 | 8.646359599 | 15.45968325 | -0.833320172 | 0.306875573 | 0.430202032 | AC100788.2   |
| ENSG00000277150 | 10.03727329 | 5.768299117 | 0.800279465  | 0.306902691 | 0.430216834 | F8A3         |
| ENSG00000286981 | 3.620934617 | 1.41669944  | 1.345491634  | 0.307088628 | 0.430454256 | AL731553.1   |
| ENSG00000253716 | 59.1687335  | 74.23950541 | -0.326827286 | 0.30721258  | 0.430604772 | MINCR        |
| ENSG00000241679 | 6.459176544 | 1.762625967 | 1.86555061   | 0.307285409 | 0.430683616 | AC018450.1   |
| ENSG00000270585 | 2.683259148 | 0.743759607 | 1.879782821  | 0.307350143 | 0.43075111  | AL445435.1   |
| ENSG00000008323 | 10.17427771 | 17.0594447  | -0.744411491 | 0.307395651 | 0.430765587 | PLEKHG6      |
| ENSG00000198874 | 313.1273977 | 386.3780064 | -0.304074955 | 0.307421927 | 0.430765587 | TYW1         |
| ENSG00000137166 | 695.7890023 | 810.1460975 | -0.219749502 | 0.307441175 | 0.430765587 | FOXP4        |
| ENSG00000151846 | 9.3688768   | 15.27662124 | -0.700352406 | 0.307448241 | 0.430765587 | PABPC3       |
| ENSG00000117020 | 65.64413656 | 98.43512423 | -0.585887602 | 0.307463946 | 0.430765587 | AKT3         |
| ENSG00000229852 | 78.26115709 | 56.63511268 | 0.463128101  | 0.307474659 | 0.430765587 | AC019205.1   |
| ENSG00000261239 | 2.682005499 | 0.743759607 | 1.879238173  | 0.307476533 | 0.430765587 | ANKRD26P1    |
| ENSG00000227331 | 2.710981963 | 0.672939833 | 1.967050262  | 0.307578941 | 0.430885823 | AC005042.1   |
| ENSG00000225265 | 15.18361872 | 27.36001253 | -0.852610034 | 0.307630463 | 0.430934764 | TAF1A-AS1    |
| ENSG00000287574 | 18.44361511 | 8.55094732  | 1.106217151  | 0.307720666 | 0.431037881 | AC004938.2   |
| novel.889       | 0           | 1.874739808 | -3.483162647 | 0.307740319 | 1           | -            |
| ENSG00000231292 | 0           | 1.874739808 | -3.483162647 | 0.307740319 | 1           | IGKV1OR2-108 |
| ENSG00000170965 | 0           | 1.874739808 | -3.483162647 | 0.307740319 | 1           | PLAC1        |
| ENSG00000249112 | 0           | 1.874739808 | -3.483162647 | 0.307740319 | 1           | AC112196.1   |
| ENSG00000285642 | 0           | 1.874739808 | -3.483162647 | 0.307740319 | 1           | AL139330.1   |
| ENSG00000253286 | 0           | 1.874739808 | -3.483162647 | 0.307740319 | 1           | AC135166.1   |
| ENSG00000183242 | 0           | 1.874739808 | -3.483162647 | 0.307740319 | 1           | WT1-AS       |
| ENSG00000281186 | 0           | 1.874739808 | -3.483162647 | 0.307740319 | 1           | LINC00706    |
| ENSG00000257918 | 0           | 1.874739808 | -3.483162647 | 0.307740319 | 1           | AC079385.3   |
| ENSG00000101278 | 0           | 1.874739808 | -3.483162647 | 0.307740319 | 1           | RPS10P5      |
| ENSG00000188992 | 5.479916852 | 2.200597239 | 1.325690195  | 0.307909396 | 0.431278992 | LIP1         |
| ENSG00000235121 | 4.288077459 | 10.09995809 | -1.243728441 | 0.307929108 | 0.43128335  | AL645504.1   |
| ENSG00000213432 | 0.586481695 | 2.578361223 | -2.110596613 | 0.308025369 | 0.431394918 | RPL17P34     |
| ENSG00000276831 | 1.495180701 | 0           | 2.916111202  | 0.308145524 | 1           | AC020922.4   |
| ENSG00000225195 | 1.495180701 | 0           | 2.916111202  | 0.308145524 | 1           | AC078962.1   |
| ENSG00000240567 | 1.495180701 | 0           | 2.916111202  | 0.308145524 | 1           | LINC02067    |
| ENSG00000234065 | 1.495180701 | 0           | 2.916111202  | 0.308145524 | 1           | MTND4P26     |
| ENSG00000265542 | 1.495180701 | 0           | 2.916111202  | 0.308145524 | 1           | AC015845.2   |
| ENSG00000270457 | 1.495180701 | 0           | 2.916111202  | 0.308145524 | 1           | AC093424.1   |
| ENSG00000248228 | 1.495180701 | 0           | 2.916111202  | 0.308145524 | 1           | SLIT2-IT1    |
| ENSG00000252695 | 1.495180701 | 0           | 2.916111202  | 0.308145524 | 1           | MIR2276      |
| ENSG00000244104 | 1.495180701 | 0           | 2.916111202  | 0.308145524 | 1           | RN7SL659P    |
| ENSG00000272988 | 1.495180701 | 0           | 2.916111202  | 0.308145524 | 1           | AC022392.1   |
| ENSG00000273791 | 1.495180701 | 0           | 2.916111202  | 0.308145524 | 1           | AC007204.1   |
| ENSG00000149260 | 988.1585591 | 788.4296715 | 0.32606502   | 0.308161685 | 0.431558934 | CAPN5        |
| ENSG00000198885 | 57.9765381  | 44.82901149 | 0.371369673  | 0.308175701 | 0.431558934 | ITPRIPL1     |
| ENSG00000103160 | 613.4277741 | 506.4784298 | 0.276770132  | 0.308199611 | 0.431564175 | HSDL1        |
| ENSG00000234936 | 10.56454841 | 6.003267678 | 0.808035459  | 0.308220566 | 0.431564175 | AC010883.1   |
| ENSG00000276903 | 0.909952655 | 2.934900236 | -1.683461286 | 0.308229276 | 0.431564175 | HIST1H2AL    |
| ENSG00000241449 | 2.082916045 | 0           | 3.393817034  | 0.308249557 | 1           | AC092666.1   |
| ENSG00000206965 | 2.082916045 | 0           | 3.393817034  | 0.308249557 | 1           | RNU6-5P      |
| ENSG00000271742 | 2.082916045 | 0           | 3.393817034  | 0.308249557 | 1           | AL121992.2   |
| ENSG00000286142 | 2.082916045 | 0           | 3.393817034  | 0.308249557 | 1           | AL122018.2   |
| ENSG00000163630 | 2.082916045 | 0           | 3.393817034  | 0.308249557 | 1           | SYNPR        |

|                 |             |             |              |             |             |            |
|-----------------|-------------|-------------|--------------|-------------|-------------|------------|
| ENSG00000265246 | 2.082916045 | 0           | 3.393817034  | 0.308249557 | 1           | AC129926.1 |
| ENSG00000145425 | 11358.47388 | 13892.00614 | -0.29049797  | 0.308258673 | 0.431582077 | RPS3A      |
| ENSG00000241439 | 0           | 2.71054416  | -4.015511187 | 0.308380198 | 0.431705691 | AC092903.1 |
| ENSG00000272028 | 0           | 2.71054416  | -4.015511187 | 0.308380198 | 0.431705691 | RNU6-87P   |
| ENSG00000235128 | 0.923814062 | 2.904218654 | -1.659467953 | 0.308401045 | 0.431711614 | AC013474.1 |
| ENSG00000196976 | 318.9767276 | 426.1325456 | -0.418409913 | 0.308567527 | 0.43192139  | LAGE3      |
| ENSG00000213757 | 2.753819833 | 6.05286248  | -1.14394937  | 0.308604016 | 0.431949194 | AC020898.1 |
| ENSG00000236024 | 0           | 2.691759334 | -4.01329691  | 0.30865367  | 0.431989265 | PRRX2-AS1  |
| ENSG00000182324 | 37.04755577 | 25.01173958 | 0.566592487  | 0.308665899 | 0.431989265 | KCNJ14     |
| ENSG00000254409 | 4.850597286 | 1.548882377 | 1.681613507  | 0.308745429 | 0.432077295 | AC087521.3 |
| ENSG00000279378 | 2.080408748 | 0           | 3.392188838  | 0.308769686 | 1           | AC009159.4 |
| ENSG00000232097 | 2.080408748 | 0           | 3.392188838  | 0.308769686 | 1           | AC079781.3 |
| ENSG00000270986 | 2.080408748 | 0           | 3.392188838  | 0.308769686 | 1           | HMGB1P51   |
| ENSG00000269043 | 2.080408748 | 0           | 3.392188838  | 0.308769686 | 1           | AC008554.2 |
| ENSG00000244932 | 30.89709113 | 42.21038368 | -0.448866533 | 0.308961919 | 0.432356976 | AL449212.1 |
| ENSG00000234134 | 2.739958426 | 5.797824823 | -1.081031752 | 0.30903712  | 0.43243892  | AL158835.2 |
| ENSG00000131931 | 148.5586397 | 179.9260004 | -0.276125685 | 0.309175878 | 0.432609785 | THAP1      |
| novel.430       | 8.441301791 | 15.96950177 | -0.912591295 | 0.309242765 | 0.432680073 | -          |
| ENSG00000241985 | 5.337541832 | 1.742556871 | 1.604688898  | 0.309275455 | 0.432702509 | WWTR1-IT1  |
| ENSG00000259571 | 1.17296339  | 5.503933243 | -2.224734037 | 0.309442717 | 0.432913211 | BLID       |
| ENSG00000183598 | 0.601596751 | 2.882993683 | -2.256982553 | 0.309604984 | 0.433116901 | HIST2H3D   |
| ENSG00000163848 | 666.4220525 | 570.2208672 | 0.225253575  | 0.309805123 | 0.433356955 | ZNF148     |
| ENSG00000150712 | 642.0528321 | 546.0323246 | 0.233135738  | 0.309809942 | 0.433356955 | MTMR12     |
| ENSG00000262052 | 4.133094681 | 0.774441189 | 2.450570804  | 0.309862689 | 0.433407404 | AC090618.1 |
| ENSG00000119314 | 989.945522  | 1226.704693 | -0.309577827 | 0.309884777 | 0.433414966 | PTBP3      |
| ENSG00000105618 | 6.379769046 | 11.39495869 | -0.840322447 | 0.310057057 | 0.433632578 | PRPF31     |
| ENSG00000286895 | 6.311786929 | 1.782695063 | 1.821601279  | 0.310101592 | 0.433671518 | AC092745.5 |
| ENSG00000158023 | 81.27164814 | 63.81638682 | 0.347325102  | 0.310286852 | 0.433907245 | WDR66      |
| ENSG00000162623 | 438.1431464 | 515.0014394 | -0.233311758 | 0.310399431 | 0.434041313 | TYW3       |
| ENSG00000214140 | 70.36092055 | 98.19296395 | -0.478490655 | 0.310488656 | 0.434142715 | PRCD       |
| ENSG00000143793 | 626.9382795 | 524.3374063 | 0.257576618  | 0.310530763 | 0.434178224 | C1orf35    |
| ENSG00000272226 | 4.897196103 | 1.426156051 | 1.774457548  | 0.310605306 | 0.434259079 | AL136985.2 |
| ENSG00000287586 | 0.308355904 | 2.058957692 | -2.669431855 | 0.310609074 | 1           | Z98886.1   |
| novel.550       | 7.838451391 | 3.270214277 | 1.266087775  | 0.310667622 | 0.434300061 | -          |
| ENSG00000064763 | 248.5870875 | 331.8270104 | -0.417472943 | 0.310668051 | 0.434300061 | FAR2       |
| ENSG00000259516 | 2.709728314 | 5.819049794 | -1.094964214 | 0.310722392 | 0.434349473 | ANP32AP1   |
| ENSG00000112787 | 866.0556159 | 723.4115316 | 0.259918024  | 0.310736833 | 0.434349473 | FBRSL1     |
| ENSG00000249492 | 17.18970584 | 11.19897244 | 0.622362956  | 0.310802113 | 0.434417349 | AC114956.3 |
| ENSG00000232412 | 3.016830569 | 0.774441189 | 2.008644604  | 0.310912457 | 0.434548203 | AL121601.1 |
| ENSG00000228623 | 23.7670108  | 15.77492819 | 0.59232768   | 0.31098569  | 0.434609653 | ZNF883     |
| ENSG00000263648 | 2.726097019 | 0.713078025 | 1.928948336  | 0.310990113 | 0.434609653 | AC005244.1 |
| ENSG00000109163 | 5.129976726 | 2.058957692 | 1.292552795  | 0.311025186 | 0.434609653 | GNRHR      |
| ENSG00000100461 | 1144.462806 | 981.7559432 | 0.221038586  | 0.31103427  | 0.434609653 | RBM23      |
| ENSG00000163605 | 1283.833537 | 1132.465111 | 0.181093768  | 0.311040064 | 0.434609653 | PPP4R2     |
| ENSG00000266970 | 8.44255544  | 4.453101031 | 0.941175277  | 0.311105764 | 0.434678078 | AC061992.1 |
| ENSG00000263968 | 1.511549406 | 4.473170127 | -1.555961835 | 0.31117947  | 0.434757679 | RN7SL381P  |
| ENSG00000149658 | 913.0671472 | 1038.347356 | -0.185476417 | 0.311351946 | 0.43495536  | YTHDF1     |
| ENSG00000172572 | 80.82170015 | 309.0691186 | -1.935249404 | 0.311362614 | 0.43495536  | PDE3A      |
| ENSG00000253967 | 0.293240848 | 2.058957692 | -2.669401795 | 0.31138206  | 1           | AC022730.4 |
| ENSG00000254990 | 0.879722543 | 3.271370153 | -1.875130485 | 0.311382684 | 0.43495536  | AP001781.1 |
| ENSG00000219023 | 5.478663203 | 2.446178286 | 1.145723572  | 0.311401994 | 0.43495536  | AL033519.2 |

|                 |             |             |              |             |             |              |
|-----------------|-------------|-------------|--------------|-------------|-------------|--------------|
| ENSG00000141258 | 1293.556344 | 1050.055013 | 0.301201405  | 0.311404667 | 0.43495536  | SGSM2        |
| ENSG00000163608 | 826.9432215 | 715.6088858 | 0.208609035  | 0.311453657 | 0.43498585  | NEPRO        |
| ENSG00000132406 | 481.6544223 | 416.1689144 | 0.210331175  | 0.311459981 | 0.43498585  | TMEM128      |
| ENSG00000267919 | 2.376156893 | 0.387220594 | 2.623162049  | 0.311609396 | 0.435171131 | AC009955.2   |
| ENSG00000279727 | 2.157237677 | 0           | 3.441497181  | 0.311687257 | 1           | LINC02033    |
| ENSG00000231739 | 2.157237677 | 0           | 3.441497181  | 0.311687257 | 1           | GAPDHP59     |
| ENSG00000254041 | 2.157237677 | 0           | 3.441497181  | 0.311687257 | 1           | AC021546.1   |
| ENSG00000242324 | 2.157237677 | 0           | 3.441497181  | 0.311687257 | 1           | AL049634.1   |
| ENSG00000287430 | 2.157237677 | 0           | 3.441497181  | 0.311687257 | 1           | AL136090.2   |
| ENSG00000281772 | 1.832513069 | 0.387220594 | 2.243553595  | 0.311757828 | 1           | AC019226.2   |
| ENSG00000249437 | 1.832513069 | 0.387220594 | 2.243553595  | 0.311757828 | 1           | NAIP         |
| ENSG00000176428 | 65.68725916 | 91.32094577 | -0.474357861 | 0.311787542 | 0.435396513 | VPS37D       |
| ENSG00000267315 | 2.373649595 | 0.387220594 | 2.621791814  | 0.31189265  | 0.435519883 | AC060766.3   |
| ENSG00000139372 | 503.0022527 | 610.2446991 | -0.279306962 | 0.311953811 | 0.435581876 | TDG          |
| ENSG00000272905 | 6.956221551 | 3.200550379 | 1.116011819  | 0.312063074 | 0.435711024 | AC018648.1   |
| ENSG00000249207 | 34.15415294 | 25.45685571 | 0.424072943  | 0.312119481 | 0.435766362 | AC079921.1   |
| ENSG00000272049 | 4.178439849 | 1.406086955 | 1.562086589  | 0.312172972 | 0.435817623 | AC091965.4   |
| ENSG00000131508 | 1763.381082 | 2002.767207 | -0.183568268 | 0.312319796 | 0.435984667 | UBE2D2       |
| ENSG00000233602 | 0.586481695 | 2.537067156 | -2.091496774 | 0.312342966 | 0.435984667 | ERI3-IT1     |
| ENSG00000251523 | 0.586481695 | 2.537067156 | -2.091496774 | 0.312342966 | 0.435984667 | AC108159.1   |
| ENSG00000250412 | 3.938137334 | 1.436768536 | 1.454783422  | 0.312412472 | 0.436058259 | KLHL2P1      |
| ENSG00000279862 | 0           | 1.844058227 | -3.461175302 | 0.312417787 | 1           | AC092964.1   |
| ENSG00000241026 | 0           | 1.844058227 | -3.461175302 | 0.312417787 | 1           | AC105910.1   |
| ENSG00000226115 | 0           | 1.844058227 | -3.461175302 | 0.312417787 | 1           | AP001476.2   |
| ENSG00000188013 | 17.21388117 | 8.011474693 | 1.095442952  | 0.312510443 | 0.436159639 | MEIS3P2      |
| ENSG00000184221 | 2.150969433 | 0           | 3.437535322  | 0.312512378 | 1           | OLIG1        |
| ENSG00000256379 | 2.150969433 | 0           | 3.437535322  | 0.312512378 | 1           | TRAV8-5      |
| ENSG00000175779 | 2.150969433 | 0           | 3.437535322  | 0.312512378 | 1           | C15orf53     |
| ENSG00000230098 | 2.150969433 | 0           | 3.437535322  | 0.312512378 | 1           | TCERG1L-AS1  |
| ENSG00000211784 | 2.150969433 | 0           | 3.437535322  | 0.312512378 | 1           | TRAV10       |
| ENSG00000260691 | 2.418994764 | 0.693008929 | 1.775640793  | 0.312525918 | 0.436159639 | ANKRD20A1    |
| ENSG00000253406 | 1.17296339  | 5.53217468  | -2.226046788 | 0.312535645 | 0.436159639 | AC012613.2   |
| novel.524       | 27.31390852 | 37.82681815 | -0.466864947 | 0.312552256 | 0.436159639 | -            |
| ENSG00000258245 | 0.308355904 | 2.169915658 | -2.736117466 | 0.312591633 | 1           | RPL10P13     |
| ENSG00000176692 | 335.5891094 | 677.0035675 | -1.012679248 | 0.312738756 | 0.436396456 | FOXC2        |
| ENSG00000145191 | 905.9691646 | 1072.667532 | -0.243420677 | 0.312763052 | 0.43640692  | EIF2B5       |
| ENSG00000168566 | 336.1564206 | 408.089608  | -0.27940105  | 0.313003758 | 0.43671933  | SNRNP48      |
| ENSG00000232814 | 8.108984019 | 14.25544313 | -0.806787519 | 0.313024492 | 0.436724806 | COL4A2-AS1   |
| ENSG00000147164 | 1170.895082 | 1363.245656 | -0.219586626 | 0.31308489  | 0.436785617 | SNX12        |
| ENSG00000248576 | 1.832513069 | 0.356539013 | 2.243569644  | 0.313136683 | 1           | AC023794.2   |
| ENSG00000283828 | 7.226754179 | 3.537020296 | 1.024936831  | 0.313161398 | 0.436840654 | AL137002.2   |
| ENSG00000206991 | 2.373649595 | 0.356539013 | 2.621774565  | 0.313162647 | 0.436840654 | RNU6-610P    |
| ENSG00000286616 | 9.236602241 | 3.384768263 | 1.432663085  | 0.313174782 | 0.436840654 | AL008730.1   |
| ENSG00000276550 | 982.204358  | 815.7055548 | 0.268198716  | 0.313204538 | 0.436858705 | HERC2P2      |
| ENSG00000130167 | 1.83125942  | 0.356539013 | 2.242758982  | 0.313316424 | 1           | TSPAN16      |
| ENSG00000128886 | 6.362146692 | 2.862924587 | 1.149712976  | 0.313335757 | 0.437018268 | ELL3         |
| ENSG00000259959 | 62.95794284 | 81.32184673 | -0.367671928 | 0.313358081 | 0.437025943 | AC107068.1   |
| ENSG00000188269 | 2.14337627  | 0           | 3.432697734  | 0.313519104 | 1           | OR7A5        |
| ENSG00000174403 | 2.14337627  | 0           | 3.432697734  | 0.313519104 | 1           | MIR1-1HG-AS1 |
| ENSG00000213075 | 2.14337627  | 0           | 3.432697734  | 0.313519104 | 1           | RPL31P11     |
| ENSG00000112195 | 2.14337627  | 0           | 3.432697734  | 0.313519104 | 1           | TREML2       |

|                 |             |             |              |             |             |             |
|-----------------|-------------|-------------|--------------|-------------|-------------|-------------|
| ENSG00000258689 | 2.14337627  | 0           | 3.432697734  | 0.313519104 | 1           | LINC01269   |
| ENSG00000213438 | 2.14337627  | 0           | 3.432697734  | 0.313519104 | 1           | YBX2P1      |
| ENSG00000120436 | 2.14337627  | 0           | 3.432697734  | 0.313519104 | 1           | GPR31       |
| ENSG00000172803 | 57.78387459 | 42.35086735 | 0.451300357  | 0.313640121 | 0.437395812 | SNX32       |
| ENSG00000225026 | 2.376156893 | 0.336469917 | 2.62313507   | 0.313716091 | 0.437455125 | AC091492.1  |
| ENSG00000140992 | 705.3375517 | 606.846703  | 0.217063824  | 0.313729024 | 0.437455125 | PDPK1       |
| ENSG00000237054 | 3.308817768 | 7.693789602 | -1.210743752 | 0.313733164 | 0.437455125 | PRMT5-AS1   |
| ENSG00000065615 | 294.8257582 | 246.1210377 | 0.26076883   | 0.313761223 | 0.43747077  | CYB5R4      |
| ENSG00000284240 | 0           | 1.90542139  | -3.505146498 | 0.313787084 | 1           | AC099062.1  |
| ENSG00000242593 | 0           | 1.90542139  | -3.505146498 | 0.313787084 | 1           | AC006148.1  |
| ENSG00000177257 | 0           | 1.90542139  | -3.505146498 | 0.313787084 | 1           | DEFB4B      |
| ENSG00000250896 | 6.378515397 | 10.81290772 | -0.761323802 | 0.313790155 | 0.437487632 | RNPS1P1     |
| ENSG00000070193 | 1.850135422 | 8.492024301 | -2.205137699 | 0.313880692 | 0.437590377 | FGF10       |
| ENSG00000206634 | 2.373649595 | 0.336469917 | 2.621763228  | 0.314002379 | 0.43771525  | SNORA22     |
| ENSG00000278408 | 0           | 1.834601616 | -3.45402407  | 0.314016111 | 1           | AC108861.1  |
| ENSG00000262358 | 0           | 1.834601616 | -3.45402407  | 0.314016111 | 1           | AC116914.1  |
| ENSG00000265380 | 0           | 1.834601616 | -3.45402407  | 0.314016111 | 1           | AC079070.1  |
| ENSG00000286502 | 6.568458149 | 12.35130601 | -0.910497566 | 0.31401801  | 0.43771525  | AL645768.1  |
| ENSG00000051108 | 1860.074547 | 2442.614379 | -0.393096053 | 0.314020805 | 0.43771525  | HERPUD1     |
| ENSG00000185049 | 653.7187586 | 552.8958327 | 0.241828441  | 0.314078114 | 0.437771647 | NELFA       |
| ENSG00000259706 | 4.841750474 | 9.802342097 | -1.014933979 | 0.314111165 | 0.437794903 | HSP90B2P    |
| ENSG00000257139 | 3.28360225  | 1.029478846 | 1.647644093  | 0.314170486 | 0.437853417 | AC084032.1  |
| ENSG00000161594 | 1.83125942  | 0.336469917 | 2.24276871   | 0.314231931 | 1           | KLHL10      |
| ENSG00000223953 | 1.83125942  | 0.336469917 | 2.24276871   | 0.314231931 | 1           | C1QTNF5     |
| ENSG00000214832 | 12.30253892 | 6.676207511 | 0.87544434   | 0.314255317 | 0.437938902 | UPF3AP2     |
| ENSG00000103460 | 3.083559037 | 0           | 3.957541854  | 0.314282392 | 0.437938902 | TOX3        |
| ENSG00000235615 | 3.083559037 | 0           | 3.957541854  | 0.314282392 | 0.437938902 | AJ239322.1  |
| ENSG00000182873 | 18.09840484 | 25.59965114 | -0.497116421 | 0.314452278 | 0.438152131 | PRKCZ-AS1   |
| ENSG00000287745 | 2.135854377 | 0           | 3.42791497   | 0.314518667 | 1           | AL359380.1  |
| ENSG00000285045 | 2.135854377 | 0           | 3.42791497   | 0.314518667 | 1           | AC006548.3  |
| ENSG00000242790 | 2.135854377 | 0           | 3.42791497   | 0.314518667 | 1           | AC104831.1  |
| ENSG00000243103 | 2.135854377 | 0           | 3.42791497   | 0.314518667 | 1           | RN7SL452P   |
| ENSG00000268093 | 6.917144626 | 3.597227584 | 0.946829828  | 0.314531555 | 0.438239091 | AC022154.1  |
| ENSG00000224316 | 3.315086011 | 1.029478846 | 1.659333122  | 0.314598035 | 0.438308213 | GTF2IP5     |
| ENSG00000222011 | 91.92996365 | 70.31770466 | 0.385833848  | 0.314752649 | 0.438480552 | FAM185A     |
| ENSG00000232725 | 21.80598412 | 11.74790168 | 0.898643075  | 0.314755487 | 0.438480552 | U52111.1    |
| ENSG00000275212 | 3.518890171 | 0.336469917 | 3.188905204  | 0.314784982 | 0.438498129 | AC005186.1  |
| ENSG00000089486 | 69.65165185 | 53.64548056 | 0.376740936  | 0.314990096 | 0.438694674 | CDIP1       |
| ENSG00000281769 | 3.07102255  | 0           | 3.951833342  | 0.314993616 | 0.438694674 | LINC01230   |
| ENSG00000226516 | 3.07102255  | 0           | 3.951833342  | 0.314993616 | 0.438694674 | FAM138B     |
| ENSG00000079689 | 3.07102255  | 0           | 3.951833342  | 0.314993616 | 0.438694674 | SCGN        |
| ENSG00000114405 | 143.8623845 | 180.7533753 | -0.330556407 | 0.315021522 | 0.438710021 | C3orf14     |
| ENSG00000272529 | 4.855611881 | 1.702418679 | 1.484799747  | 0.315086369 | 0.438746551 | AC090948.3  |
| ENSG00000250090 | 4.855611881 | 1.702418679 | 1.484799747  | 0.315086369 | 0.438746551 | AL390198.2  |
| ENSG00000227258 | 7.077142    | 2.099095884 | 1.743403387  | 0.315098414 | 0.438746551 | SMIM2-AS1   |
| ENSG00000138207 | 11.71752434 | 63.55592093 | -2.440050927 | 0.31512128  | 0.438754875 | RBP4        |
| ENSG00000163915 | 2.459325337 | 6.04340587  | -1.305441478 | 0.315169582 | 0.438798612 | IGF2BP2-AS1 |
| ENSG00000265321 | 2.391271949 | 5.768299117 | -1.263516334 | 0.315208768 | 0.438829654 | MIR4263     |
| ENSG00000196754 | 33.954181   | 47.160379   | -0.470389725 | 0.315373417 | 0.439035351 | S100A2      |
| ENSG00000139197 | 965.0366373 | 782.7669365 | 0.302373348  | 0.315430754 | 0.439091643 | PEX5        |
| ENSG00000170584 | 583.3348573 | 697.44145   | -0.257918816 | 0.315462954 | 0.439112939 | NUDCD2      |

|                 |             |             |              |             |             |            |
|-----------------|-------------|-------------|--------------|-------------|-------------|------------|
| ENSG00000253139 | 1.816144364 | 0.356539013 | 2.232882428  | 0.315507958 | 1           | AC013644.1 |
| ENSG00000259628 | 1.816144364 | 0.356539013 | 2.232882428  | 0.315507958 | 1           | AC007000.3 |
| ENSG00000082641 | 5884.512054 | 7139.51916  | -0.278908736 | 0.31562218  | 0.439311039 | NFE2L1     |
| ENSG00000118096 | 452.0893661 | 379.7311494 | 0.251587214  | 0.315697079 | 0.439391751 | IFT46      |
| ENSG00000286672 | 3.870083945 | 7.907533193 | -1.023504998 | 0.315726351 | 0.43940422  | AL096712.2 |
| ENSG00000258745 | 4.1771862   | 1.487519214 | 1.512431616  | 0.315753359 | 0.43940422  | AL358334.3 |
| ENSG00000084110 | 5.364010998 | 1.90542139  | 1.522458495  | 0.315756776 | 0.43940422  | HAL        |
| novel.1090      | 111.1482507 | 66.76339342 | 0.734470217  | 0.315913908 | 0.439586679 | -          |
| ENSG00000274501 | 0.616711807 | 2.598430319 | -2.077735138 | 0.315923773 | 0.439586679 | AL121845.4 |
| ENSG00000166173 | 427.3885521 | 624.8969488 | -0.548136137 | 0.31593865  | 0.439586679 | LARP6      |
| ENSG00000254391 | 1.803536605 | 0.387220594 | 2.224611176  | 0.31594395  | 1           | AC011363.1 |
| ENSG00000069812 | 2.14337627  | 5.797824823 | -1.438142945 | 0.315983563 | 0.439625627 | HES2       |
| ENSG00000230154 | 6.985198015 | 12.41254078 | -0.825852071 | 0.316051677 | 0.439696847 | AC018463.1 |
| ENSG00000233154 | 1.818651661 | 0.336469917 | 2.234511874  | 0.316069804 | 1           | LINC01762  |
| ENSG00000259130 | 1.802282956 | 0.387220594 | 2.223795167  | 0.316125769 | 1           | AL133371.3 |
| ENSG00000246375 | 12.2021754  | 4.291392388 | 1.506632363  | 0.316214445 | 0.439883584 | PPM1K-DT   |
| ENSG00000176845 | 134.4147566 | 86.96587847 | 0.629576238  | 0.316219764 | 0.439883584 | METRNL     |
| ENSG00000010803 | 636.0865992 | 535.1639146 | 0.249383093  | 0.316291305 | 0.439952907 | SCMH1      |
| ENSG00000172426 | 42.53750181 | 30.37732533 | 0.491985819  | 0.316303466 | 0.439952907 | RSPH9      |
| ENSG00000255408 | 8.571069053 | 3.505182839 | 1.27967085   | 0.316332933 | 0.439970339 | PCDHA3     |
| ENSG00000234632 | 1.816144364 | 0.336469917 | 2.232882142  | 0.316434636 | 1           | NECAP1P2   |
| ENSG00000186130 | 227.1322697 | 266.2087117 | -0.228891693 | 0.316729911 | 0.440498893 | ZBTB6      |
| ENSG00000242094 | 3.376799885 | 0.723690511 | 2.225186817  | 0.316766523 | 0.44052623  | FOXP1-IT1  |
| ENSG00000188883 | 3.37178529  | 1.049547942 | 1.664224565  | 0.316823235 | 0.440581516 | KLRG2      |
| ENSG00000127928 | 0           | 1.885352294 | -3.490803403 | 0.317006229 | 1           | GNGT1      |
| ENSG00000187959 | 5.095985668 | 1.406086955 | 1.849851444  | 0.31708204  | 0.44089962  | CPSF4L     |
| ENSG00000274341 | 8.163176    | 3.749479616 | 1.140384363  | 0.317085924 | 0.44089962  | AC005899.6 |
| ENSG00000261229 | 0.61420451  | 2.578361223 | -2.07163883  | 0.317259629 | 0.441117543 | AC021483.2 |
| novel.799       | 3.619680969 | 1.467450118 | 1.319680403  | 0.317459031 | 0.441300974 | -          |
| ENSG00000279259 | 19.5898246  | 12.9521418  | 0.599170498  | 0.317472594 | 0.441300974 | AC087741.3 |
| ENSG00000278997 | 27.76206087 | 18.57764549 | 0.57637094   | 0.317483005 | 0.441300974 | AL662907.1 |
| ENSG00000213085 | 9.547465442 | 18.13723408 | -0.921164598 | 0.31748394  | 0.441300974 | CFAP45     |
| ENSG00000120733 | 1463.730583 | 1250.851895 | 0.226911118  | 0.317488894 | 0.441300974 | KDM3B      |
| ENSG00000185730 | 207.5707095 | 175.9830559 | 0.23881844   | 0.317493469 | 0.441300974 | ZNF696     |
| ENSG00000175985 | 4.204909015 | 1.518200796 | 1.502430119  | 0.317530095 | 0.441328273 | PLEKHD1    |
| ENSG00000269444 | 0.925067711 | 3.475657132 | -1.924471206 | 0.317555597 | 0.441340107 | AC011491.2 |
| ENSG00000279930 | 5.68497466  | 2.446178286 | 1.205304838  | 0.317585654 | 0.44135827  | AL032819.2 |
| ENSG00000126698 | 1371.759189 | 1577.364624 | -0.201595005 | 0.317649313 | 0.44141767  | DNAJC8     |
| ENSG00000180596 | 16.23086053 | 27.06581699 | -0.737144337 | 0.317662375 | 0.44141767  | HIST1H2BC  |
| ENSG00000241680 | 3.619680969 | 1.069617038 | 1.754695432  | 0.317721263 | 0.441475886 | RPL31P49   |
| ENSG00000127337 | 236.275247  | 289.4389589 | -0.293752512 | 0.31780265  | 0.441552115 | YEATS4     |
| ENSG00000100285 | 64.22216603 | 133.4969359 | -1.056468668 | 0.317810113 | 0.441552115 | NEFH       |
| ENSG00000068078 | 254.2103049 | 144.9212919 | 0.80972822   | 0.318130687 | 0.441970532 | FGFR3      |
| ENSG00000287620 | 8.531992128 | 4.637318915 | 0.874429376  | 0.318145294 | 0.441970532 | AC092053.4 |
| ENSG00000228801 | 89.70341894 | 67.91307723 | 0.399044758  | 0.318178604 | 0.441993173 | AC064807.1 |
| ENSG00000233862 | 1.803536605 | 0.336469917 | 2.224588742  | 0.318291301 | 1           | AC016907.2 |
| ENSG00000187589 | 1.803536605 | 0.336469917 | 2.224588742  | 0.318291301 | 1           | TERF1P2    |
| ENSG00000231794 | 1.803536605 | 0.336469917 | 2.224588742  | 0.318291301 | 1           | AC009542.1 |
| ENSG00000183396 | 1.535511275 | 5.422372589 | -1.823696194 | 0.318299891 | 0.442138017 | TMEM89     |
| ENSG00000257175 | 7.601909822 | 3.331577441 | 1.201720419  | 0.318503798 | 0.442397604 | CR383656.1 |
| ENSG00000260369 | 4.240153722 | 1.396630344 | 1.587986569  | 0.318861513 | 0.442868951 | AC120024.1 |

|                 |             |             |              |             |             |            |
|-----------------|-------------|-------------|--------------|-------------|-------------|------------|
| ENSG00000278899 | 7.23685464  | 3.088436538 | 1.209773683  | 0.318877236 | 0.442868951 | AL358852.1 |
| ENSG00000075275 | 20.89373763 | 12.92390036 | 0.683833641  | 0.318922596 | 0.442903706 | CELSR1     |
| ENSG00000189045 | 15.25543306 | 8.735165204 | 0.793108478  | 0.318936355 | 0.442903706 | ANKDD1B    |
| ENSG00000260487 | 2.465593581 | 0.387220594 | 2.671741037  | 0.319041345 | 0.443025825 | AC116348.1 |
| ENSG00000104852 | 6100.989553 | 7572.031075 | -0.311607442 | 0.319151093 | 0.443154538 | SNRNP70    |
| ENSG00000233893 | 3.368024343 | 1.029478846 | 1.679535147  | 0.319376059 | 0.443432229 | EZR-AS1    |
| ENSG00000135452 | 623.8610154 | 536.4874606 | 0.217434705  | 0.319385216 | 0.443432229 | TSPAN31    |
| novel.879       | 3.895299463 | 9.081091731 | -1.222730495 | 0.319455602 | 0.443506252 | -          |
| ENSG00000119608 | 14.64595841 | 7.35616381  | 1.001651235  | 0.319536877 | 0.443595383 | PROX2      |
| ENSG00000277232 | 9.362608556 | 5.299646263 | 0.813134753  | 0.319592319 | 0.44363406  | GTSE1-DT   |
| ENSG00000269481 | 10.91574218 | 6.277090162 | 0.811434444  | 0.319598888 | 0.44363406  | AC010319.4 |
| ENSG00000112200 | 777.8537728 | 667.553557  | 0.22094766   | 0.319676925 | 0.443703254 | ZNF451     |
| ENSG00000229081 | 5.795865919 | 2.058957692 | 1.472457175  | 0.319682892 | 0.443703254 | LINC01165  |
| ENSG00000174483 | 13.8141596  | 22.74387141 | -0.716321388 | 0.319752946 | 0.443776779 | BBS1       |
| ENSG00000207554 | 10.81745868 | 17.06992879 | -0.651531422 | 0.319799239 | 0.443794576 | MIR647     |
| ENSG00000232748 | 5.420710276 | 2.446178286 | 1.133736075  | 0.319799933 | 0.443794576 | AC135050.1 |
| ENSG00000133243 | 1924.015234 | 2292.414059 | -0.252603403 | 0.319824199 | 0.443804545 | BTBD2      |
| ENSG00000272070 | 10.30780592 | 6.094156548 | 0.757103655  | 0.319990005 | 0.444010913 | AC005618.1 |
| ENSG00000205571 | 16.15381814 | 6.32784084  | 1.359243559  | 0.32004157  | 0.444042111 | SMN2       |
| novel.945       | 6.066398547 | 10.07860473 | -0.732149579 | 0.320046671 | 0.444042111 | -          |
| ENSG00000103978 | 1127.310895 | 984.0795582 | 0.196235328  | 0.320070203 | 0.444051046 | TMEM87A    |
| ENSG00000162076 | 568.1175472 | 666.0215932 | -0.22945849  | 0.320143238 | 0.444128656 | FLYWCH2    |
| ENSG00000153495 | 6.27647095  | 1.936102971 | 1.724147416  | 0.32019151  | 0.444171905 | TEX29      |
| ENSG00000267277 | 7.308668974 | 3.678659843 | 1.001770695  | 0.320241473 | 0.444217497 | AC024575.1 |
| ENSG00000025156 | 238.0656342 | 280.403224  | -0.236826127 | 0.320289354 | 0.444260194 | HSF2       |
| ENSG00000220583 | 0.600343103 | 2.211209725 | -1.865667805 | 0.320364798 | 0.444341117 | RPL35P2    |
| ENSG00000087338 | 336.3953544 | 390.6387516 | -0.216067941 | 0.320405605 | 0.444373994 | GMCL1      |
| ENSG00000156983 | 486.7788584 | 573.5726553 | -0.236447398 | 0.320429999 | 0.444384104 | BRPF1      |
| ENSG00000135587 | 141.1242492 | 174.4908791 | -0.306954919 | 0.320447349 | 0.444384445 | SMPD2      |
| ENSG00000237135 | 3.632288727 | 1.41669944  | 1.349366918  | 0.32049116  | 0.444421478 | DDX10P1    |
| ENSG00000164077 | 358.3262772 | 288.9887529 | 0.309647645  | 0.320590301 | 0.444535231 | MON1A      |
| ENSG00000170906 | 0.601596751 | 2.618499415 | -2.109205354 | 0.320613968 | 0.444544322 | NDUFA3     |
| ENSG00000286365 | 4.175932552 | 1.161661783 | 1.883050348  | 0.320834168 | 0.444825899 | AP000553.9 |
| ENSG00000136114 | 127.1854795 | 80.22827343 | 0.662399825  | 0.320927069 | 0.44493096  | THSD1      |
| ENSG00000129988 | 0.586481695 | 3.088436538 | -2.388369766 | 0.321024397 | 0.445042146 | LBP        |
| ENSG00000120685 | 449.8575937 | 540.2713459 | -0.264614245 | 0.321192389 | 0.445251278 | PROSER1    |
| ENSG00000136040 | 459.6844212 | 848.2613368 | -0.883769345 | 0.321327169 | 0.445360573 | PLXNC1     |
| ENSG00000273391 | 8.484139662 | 13.41133804 | -0.657092499 | 0.32133803  | 0.445360573 | AC083880.1 |
| ENSG00000231181 | 6.627664725 | 2.844011366 | 1.217736342  | 0.321338793 | 0.445360573 | AL954705.1 |
| ENSG00000121005 | 273.5465068 | 84.41726538 | 1.69573644   | 0.321339798 | 0.445360573 | CRISPLD1   |
| ENSG00000279039 | 1.229662669 | 3.52640781  | -1.533419159 | 0.321357896 | 0.445361898 | AC011447.6 |
| ENSG00000275092 | 1.17296339  | 3.9336975   | -1.732048418 | 0.32146257  | 0.4454832   | AL031710.2 |
| ENSG00000137100 | 1029.662747 | 1226.87187  | -0.252937624 | 0.321543047 | 0.445542419 | DCTN3      |
| ENSG00000207088 | 0.894837599 | 2.985650913 | -1.718541774 | 0.321551447 | 0.445542419 | SNORA7B    |
| ENSG00000203279 | 3.068443981 | 7.827256809 | -1.35631605  | 0.321556749 | 0.445542419 | AL590705.1 |
| ENSG00000225339 | 14.99213759 | 8.815441588 | 0.761237522  | 0.321647549 | 0.445644463 | AL354740.1 |
| ENSG00000272663 | 10.46375761 | 5.379922647 | 0.961643629  | 0.321665575 | 0.445645672 | AC093635.1 |
| ENSG00000231369 | 2.451732174 | 0.356539013 | 2.664276524  | 0.321734414 | 0.445717278 | Z97353.1   |
| ENSG00000171298 | 2543.58357  | 2113.018926 | 0.26769774   | 0.32184282  | 0.445843684 | GAA        |
| ENSG00000271789 | 2.654282684 | 6.857985251 | -1.359650137 | 0.322036245 | 0.446087849 | AL080317.2 |
| ENSG00000249786 | 4.592601146 | 1.773238453 | 1.363409648  | 0.322114082 | 0.446171881 | EAF1-AS1   |

|                 |             |             |              |             |             |            |
|-----------------|-------------|-------------|--------------|-------------|-------------|------------|
| ENSG00000213608 | 0           | 1.783850939 | -3.416628296 | 0.322118002 | 1           | SLC25A14P1 |
| ENSG00000286268 | 0           | 1.783850939 | -3.416628296 | 0.322118002 | 1           | AF196969.1 |
| ENSG00000139974 | 225.0876473 | 263.7391723 | -0.228736925 | 0.32217199  | 0.446228301 | SLC38A6    |
| ENSG00000136943 | 15.4503904  | 22.67651926 | -0.552722428 | 0.322210674 | 0.446249473 | CTSV       |
| ENSG00000235481 | 7.23685464  | 3.586615098 | 1.013077326  | 0.322221628 | 0.446249473 | UBE2R2-AS1 |
| ENSG00000127507 | 102.3072626 | 129.8827089 | -0.343460858 | 0.322604032 | 0.446754015 | ADGRE2     |
| ENSG00000130559 | 810.0319978 | 693.8314134 | 0.223549753  | 0.322620331 | 0.446754015 | CAMSAP1    |
| ENSG00000250986 | 19.71339454 | 6.453135705 | 1.603569183  | 0.322669095 | 0.446797727 | LINC02600  |
| ENSG00000272516 | 2.442956632 | 0.356539013 | 2.659545911  | 0.32271366  | 0.446835621 | AL158211.4 |
| ENSG00000286145 | 0           | 2.495773089 | -3.901177557 | 0.322713926 | 1           | AC068282.1 |
| ENSG00000278275 | 0           | 2.495773089 | -3.901177557 | 0.322713926 | 1           | AC103705.1 |
| ENSG00000125962 | 153.0767054 | 188.308351  | -0.299279469 | 0.322929971 | 0.447111301 | ARMCX5     |
| ENSG00000198400 | 9.834651509 | 3.852265241 | 1.343400338  | 0.323006433 | 0.447193335 | NTRK1      |
| ENSG00000271904 | 2.932408476 | 0           | 3.887159215  | 0.323126074 | 0.447287471 | AC091826.2 |
| ENSG00000188620 | 2.932408476 | 0           | 3.887159215  | 0.323126074 | 0.447287471 | HMX3       |
| ENSG00000245205 | 2.932408476 | 0           | 3.887159215  | 0.323126074 | 0.447287471 | EEF1A1P4   |
| ENSG00000280353 | 3.299970955 | 1.049547942 | 1.638233078  | 0.323195239 | 0.447359377 | AC011466.4 |
| ENSG00000201457 | 2.421502061 | 6.469608781 | -1.41774785  | 0.323273518 | 0.447443891 | SNORA55    |
| ENSG00000196950 | 696.9862412 | 575.6994444 | 0.275303893  | 0.323306214 | 0.447465307 | SLC39A10   |
| ENSG00000116138 | 371.7842284 | 442.2853062 | -0.250193308 | 0.323473869 | 0.447663661 | DNAJC16    |
| ENSG00000224511 | 2.442956632 | 0.336469917 | 2.659549711  | 0.323483991 | 0.447663661 | LINC00365  |
| ENSG00000198000 | 708.2770826 | 821.8131277 | -0.214751187 | 0.32360039  | 0.447800891 | NOL8       |
| ENSG00000132972 | 2.067800989 | 0           | 3.38382635   | 0.323804324 | 1           | RNF17      |
| ENSG00000283886 | 2.067800989 | 0           | 3.38382635   | 0.323804324 | 1           | BX664615.2 |
| ENSG00000278413 | 2.067800989 | 0           | 3.38382635   | 0.323804324 | 1           | RF02271    |
| ENSG00000223390 | 2.067800989 | 0           | 3.38382635   | 0.323804324 | 1           | AL445685.1 |
| ENSG00000282121 | 2.067800989 | 0           | 3.38382635   | 0.323804324 | 1           | AL592430.2 |
| ENSG00000129535 | 2.067800989 | 0           | 3.38382635   | 0.323804324 | 1           | NRL        |
| ENSG00000163602 | 7.270845699 | 3.953766596 | 0.879384329  | 0.323828016 | 0.448070523 | RYBP       |
| ENSG00000170579 | 13.34233011 | 6.196942172 | 1.094830078  | 0.32382973  | 0.448070523 | DLGAP1     |
| ENSG00000239291 | 0.601596751 | 2.587817834 | -2.094817336 | 0.323905547 | 0.448151562 | AC002558.1 |
| novel.232       | 2.06654734  | 0           | 3.383004577  | 0.323979071 | 1           | -          |
| ENSG00000249851 | 2.06654734  | 0           | 3.383004577  | 0.323979071 | 1           | RPS27AP18  |
| ENSG00000254330 | 2.06654734  | 0           | 3.383004577  | 0.323979071 | 1           | AC104232.2 |
| ENSG00000223650 | 2.06654734  | 0           | 3.383004577  | 0.323979071 | 1           | UHRF2P1    |
| ENSG00000280232 | 2.06654734  | 0           | 3.383004577  | 0.323979071 | 1           | AL589666.2 |
| ENSG00000229206 | 2.06654734  | 0           | 3.383004577  | 0.323979071 | 1           | AL162408.1 |
| novel.320       | 2.06654734  | 0           | 3.383004577  | 0.323979071 | 1           | -          |
| ENSG00000188107 | 12.98103588 | 21.40847583 | -0.715533661 | 0.324012665 | 0.448275896 | EYS        |
| novel.1100      | 9.058013599 | 16.0676639  | -0.822860836 | 0.324041355 | 0.448291716 | -          |
| ENSG00000256128 | 3.374292587 | 7.295956522 | -1.11365649  | 0.324321044 | 0.448654759 | LINC00944  |
| ENSG00000235437 | 380.7860406 | 332.7640125 | 0.194719829  | 0.324374279 | 0.448704512 | LINC01278  |
| ENSG00000233246 | 0.879722543 | 3.230076085 | -1.860505717 | 0.324658613 | 0.449073919 | AL513327.2 |
| ENSG00000272195 | 7.794359872 | 3.953766596 | 0.982338651  | 0.325089306 | 0.449645723 | AL356512.1 |
| ENSG00000032742 | 348.5909924 | 265.9527406 | 0.389718755  | 0.325246193 | 0.449838773 | IFT88      |
| ENSG00000113732 | 2001.212917 | 2462.006223 | -0.299067315 | 0.325336775 | 0.449940102 | ATP6V0E1   |
| ENSG00000243004 | 0.308355904 | 2.069570178 | -2.675105801 | 0.325419453 | 1           | AC005062.1 |
| ENSG00000227398 | 41.99378671 | 56.8179179  | -0.43778028  | 0.325627411 | 0.45031808  | KIF9-AS1   |
| ENSG00000110852 | 466.3166872 | 313.4805969 | 0.573325263  | 0.325683033 | 0.450361786 | CLEC2B     |
| ENSG00000107731 | 605.2797093 | 365.1404987 | 0.72871703   | 0.325693684 | 0.450361786 | UNC5B      |
| ENSG00000160633 | 2029.811386 | 2307.091085 | -0.184763658 | 0.325795955 | 0.45045886  | SAFB       |

|                 |             |             |              |             |             |            |
|-----------------|-------------|-------------|--------------|-------------|-------------|------------|
| ENSG00000251602 | 32.59245724 | 46.11827989 | -0.504128195 | 0.325798562 | 0.45045886  | AL928654.1 |
| ENSG00000159753 | 62.74955101 | 83.77277692 | -0.418171467 | 0.325851527 | 0.450473417 | CARMIL2    |
| ENSG00000286989 | 12.15292675 | 7.094109687 | 0.770573454  | 0.325859639 | 0.450473417 | AL691432.4 |
| ENSG00000261669 | 5.759296292 | 2.802717299 | 1.023576218  | 0.325878986 | 0.450473417 | AC008731.1 |
| ENSG00000137834 | 289.6838141 | 446.6140024 | -0.625056711 | 0.325882793 | 0.450473417 | SMAD6      |
| ENSG00000158062 | 411.3411838 | 337.4974517 | 0.285034353  | 0.325895784 | 0.450473417 | UBXN11     |
| ENSG00000211455 | 784.6749115 | 905.0608029 | -0.206258517 | 0.325918392 | 0.450480701 | STK38L     |
| ENSG00000014919 | 411.8483575 | 484.0642815 | -0.233577542 | 0.32596058  | 0.450515046 | COX15      |
| ENSG00000233170 | 26.13557453 | 16.15500393 | 0.695451995  | 0.32609694  | 0.450679535 | AC138356.2 |
| ENSG00000033122 | 62.28037171 | 38.73973523 | 0.682599039  | 0.326224358 | 0.450794737 | LRRC7      |
| ENSG00000178631 | 8.466517309 | 4.677457107 | 0.857754328  | 0.326228082 | 0.450794737 | ACTG1P1    |
| ENSG00000103091 | 798.3163831 | 651.3441255 | 0.293976967  | 0.326232348 | 0.450794737 | WDR59      |
| ENSG00000277425 | 5.763057239 | 2.435565801 | 1.226014248  | 0.326256676 | 0.450804377 | AL121890.4 |
| ENSG00000260493 | 5.601806216 | 1.456837632 | 1.949995396  | 0.326311372 | 0.450855975 | AC011773.4 |
| ENSG00000205913 | 29.14606558 | 41.79620592 | -0.520895533 | 0.326571208 | 0.451173992 | SRRM2-AS1  |
| ENSG00000285979 | 42.64560104 | 58.62641425 | -0.457261317 | 0.326576271 | 0.451173992 | AC009090.6 |
| ENSG00000232901 | 3.052075276 | 6.45069556  | -1.083811182 | 0.326641984 | 0.451240782 | CYCSP10    |
| ENSG00000162396 | 74.22265623 | 90.61899381 | -0.288686127 | 0.326760856 | 0.451380998 | PARS2      |
| ENSG00000261170 | 10.94471865 | 17.80076416 | -0.700177928 | 0.326916382 | 0.451571829 | AC009053.3 |
| ENSG00000174485 | 418.5373363 | 517.2437033 | -0.30517448  | 0.326942232 | 0.451583526 | DENND4A    |
| ENSG00000237356 | 11.26059644 | 5.837963015 | 0.952462103  | 0.327123572 | 0.45180998  | AL365295.1 |
| ENSG00000107290 | 1625.178726 | 1440.884031 | 0.173592665  | 0.327166537 | 0.451845301 | SETX       |
| novel.787       | 4.792644359 | 2.10970837  | 1.174393068  | 0.327194146 | 0.451859412 | -          |
| ENSG00000259425 | 3.378124804 | 0.356539013 | 3.127316964  | 0.327361811 | 0.45206693  | AC011767.1 |
| ENSG00000251000 | 7.371636497 | 3.139187216 | 1.217405576  | 0.327399502 | 0.452094948 | AC008592.3 |
| ENSG00000163263 | 3.895299463 | 1.049547942 | 1.880495167  | 0.327623152 | 0.452374336 | C1orf189   |
| ENSG00000214827 | 22.03493252 | 36.45410971 | -0.725425719 | 0.327636653 | 0.452374336 | MTCP1      |
| ENSG00000184634 | 844.432409  | 698.6270549 | 0.273819698  | 0.327935537 | 0.45276295  | MED12      |
| ENSG00000277203 | 157.7237833 | 122.2261038 | 0.36921315   | 0.328111111 | 0.452981283 | F8A1       |
| ENSG00000251413 | 0           | 1.813376645 | -3.438919601 | 0.328135513 | 1           | AC068898.2 |
| ENSG00000248235 | 0           | 1.813376645 | -3.438919601 | 0.328135513 | 1           | AC037459.1 |
| ENSG00000283176 | 0           | 1.813376645 | -3.438919601 | 0.328135513 | 1           | AC103706.2 |
| ENSG00000257568 | 0           | 1.813376645 | -3.438919601 | 0.328135513 | 1           | AC079035.1 |
| ENSG00000235813 | 0           | 1.813376645 | -3.438919601 | 0.328135513 | 1           | AL672032.1 |
| ENSG00000262172 | 0           | 1.813376645 | -3.438919601 | 0.328135513 | 1           | AC116025.2 |
| ENSG00000200403 | 2.723589721 | 0.672939833 | 1.975891764  | 0.328285595 | 0.453186118 | RNU6-1099P |
| ENSG00000179846 | 3.929290521 | 7.509700113 | -0.935234005 | 0.328294366 | 0.453186118 | NKPD1      |
| ENSG00000235602 | 11.2593428  | 6.767096381 | 0.728901093  | 0.32839383  | 0.453299335 | POU5F1P3   |
| ENSG00000287261 | 8.915638578 | 3.873490212 | 1.199140632  | 0.328418081 | 0.453308727 | AL139243.1 |
| ENSG00000131069 | 649.2649419 | 738.1748326 | -0.184985181 | 0.328464837 | 0.453349178 | ACSS2      |
| ENSG00000002079 | 2.68075185  | 6.460152171 | -1.263001982 | 0.328595146 | 0.45350494  | MYH16      |
| ENSG00000284657 | 4.778782952 | 1.844058227 | 1.390236063  | 0.328726819 | 0.453662568 | AL031432.5 |
| ENSG00000244607 | 3.038213869 | 0.743759607 | 2.049432532  | 0.328746773 | 0.453666007 | CCDC13     |
| ENSG00000267011 | 0.615458159 | 2.180528143 | -1.832142481 | 0.328853285 | 0.453788889 | AC011498.1 |
| ENSG00000162885 | 19.74989324 | 33.28899281 | -0.756363132 | 0.328975377 | 0.453933255 | B3GALNT2   |
| ENSG00000248634 | 0           | 1.742556871 | -3.385828322 | 0.328978991 | 1           | AC008588.1 |
| ENSG00000230188 | 0           | 1.742556871 | -3.385828322 | 0.328978991 | 1           | AL158156.1 |
| ENSG00000199151 | 0           | 1.742556871 | -3.385828322 | 0.328978991 | 1           | MIR337     |
| ENSG00000251303 | 0           | 1.742556871 | -3.385828322 | 0.328978991 | 1           | CAB39P1    |
| ENSG00000201710 | 0           | 1.742556871 | -3.385828322 | 0.328978991 | 1           | RF00181    |
| ENSG00000002746 | 11.39029243 | 24.97887464 | -1.136147149 | 0.329020045 | 0.453970781 | HECW1      |



|                 |             |             |              |             |             |            |
|-----------------|-------------|-------------|--------------|-------------|-------------|------------|
| ENSG00000280739 | 56.77835919 | 43.52802191 | 0.382129234  | 0.329059449 | 0.454001038 | EIF1B-AS1  |
| ENSG00000185527 | 8.846687547 | 4.12852787  | 1.081644006  | 0.329090621 | 0.454019935 | AC139530.1 |
| ENSG00000267336 | 0.600343103 | 2.140389951 | -1.829871344 | 0.329305839 | 0.45429273  | EIF4A2P1   |
| ENSG00000169914 | 310.9311978 | 372.8224134 | -0.261668928 | 0.329421434 | 0.45442807  | OTUD3      |
| ENSG00000254862 | 5.172814597 | 2.496928964 | 1.045073576  | 0.329474928 | 0.454477734 | AC100771.2 |
| ENSG00000197114 | 149.0122061 | 180.4679943 | -0.275207516 | 0.329576612 | 0.454593861 | ZGPAT      |
| ENSG00000272914 | 8.504269313 | 4.73882027  | 0.851267493  | 0.329611658 | 0.454618065 | AL359532.1 |
| ENSG00000198682 | 1581.56076  | 1902.430458 | -0.266650977 | 0.329660244 | 0.454660941 | PAPSS2     |
| ENSG00000279692 | 20.16488091 | 11.53672663 | 0.799277927  | 0.329709959 | 0.454705369 | AC110285.6 |
| ENSG00000138029 | 2252.470691 | 1972.403273 | 0.191606846  | 0.329748966 | 0.454735026 | HADHB      |
| ENSG00000138823 | 1.833766717 | 0.336469917 | 2.24457952   | 0.329752685 | 1           | MTTP       |
| ENSG00000225489 | 2.697120555 | 0.713078025 | 1.91610949   | 0.329787902 | 0.454764582 | AL354707.1 |
| ENSG00000162493 | 1080.458266 | 617.657647  | 0.806996873  | 0.329806169 | 0.454765634 | PDPN       |
| ENSG00000116661 | 227.8322799 | 130.4040733 | 0.806157979  | 0.329902642 | 0.454874518 | FBXO2      |
| ENSG00000278703 | 0.293240848 | 2.038888596 | -2.656290075 | 0.330212831 | 1           | AC100847.1 |
| ENSG00000260051 | 9.230333997 | 19.32944905 | -1.060293311 | 0.330250831 | 0.455328414 | AL031600.1 |
| novel.465       | 10.93433345 | 4.53581756  | 1.264468306  | 0.330266886 | 0.455328414 | -          |
| ENSG00000267052 | 0.879722543 | 3.576002612 | -2.010412434 | 0.330358118 | 0.455430026 | AC005050.1 |
| ENSG00000170909 | 10.92451773 | 5.308974479 | 1.058591761  | 0.330413711 | 0.455477714 | OSCAR      |
| ENSG00000253582 | 8.218621629 | 4.116631115 | 1.014818633  | 0.330427773 | 0.455477714 | AC090579.1 |
| ENSG00000284977 | 24.90111073 | 12.13769081 | 1.031011598  | 0.330494328 | 0.455545288 | AL160272.1 |
| ENSG00000169682 | 11.10310637 | 18.87269295 | -0.760905698 | 0.330678635 | 0.455775152 | SPNS1      |
| ENSG00000148153 | 422.0019635 | 354.5277899 | 0.250541182  | 0.330709026 | 0.45579286  | INIP       |
| ENSG00000167080 | 0.601596751 | 2.129777466 | -1.823456816 | 0.330961917 | 0.456117206 | B4GALNT2   |
| ENSG00000259562 | 24.72230862 | 17.05114396 | 0.533034938  | 0.331020488 | 0.456173729 | AC090607.2 |
| ENSG00000104808 | 4.807759415 | 2.211209725 | 1.139444944  | 0.331060308 | 0.456204405 | DHDH       |
| ENSG00000005882 | 352.5009641 | 287.4971585 | 0.295014901  | 0.331085722 | 0.456215229 | PDK2       |
| ENSG00000229251 | 0.921306765 | 3.189937893 | -1.801776686 | 0.331232158 | 0.456392803 | HNRNPA1P8  |
| ENSG00000230042 | 7.57167971  | 3.903015919 | 0.949767354  | 0.331417592 | 0.456624089 | AK3P3      |
| ENSG00000276505 | 3.021845164 | 6.502602113 | -1.102723346 | 0.331569839 | 0.456809629 | AP000892.2 |
| ENSG00000273472 | 18.01928208 | 11.24026651 | 0.682769496  | 0.33159174  | 0.456815579 | AC096733.2 |
| ENSG00000214367 | 365.9022594 | 307.1489158 | 0.2528971    | 0.331609867 | 0.456816329 | HAUS3      |
| ENSG00000285569 | 2.127007565 | 5.13665335  | -1.267416327 | 0.331692902 | 0.456884909 | AC099344.3 |
| ENSG00000230537 | 11.68582712 | 6.522671209 | 0.847633222  | 0.331694821 | 0.456884909 | AL158071.3 |
| ENSG00000228444 | 8.732035341 | 4.566499142 | 0.926674979  | 0.331731523 | 0.456911239 | AL137244.1 |
| ENSG00000264853 | 2.405133356 | 0.693008929 | 1.770557684  | 0.331765328 | 0.456919064 | AC011933.2 |
| ENSG00000108001 | 408.9690685 | 206.1314613 | 0.987971297  | 0.331772378 | 0.456919064 | EBF3       |
| ENSG00000173486 | 18.21674672 | 11.01591043 | 0.732694275  | 0.331926431 | 0.457088024 | FKBP2      |
| ENSG00000115825 | 1030.63336  | 1272.083076 | -0.303502075 | 0.331930247 | 0.457088024 | PRKD3      |
| ENSG00000189129 | 549.2081241 | 284.6518878 | 0.947748098  | 0.331962075 | 0.457107625 | PLAC9      |
| ENSG00000083812 | 175.3342472 | 210.6629468 | -0.26509673  | 0.332027294 | 0.457146362 | ZNF324     |
| ENSG00000245317 | 2.402626059 | 0.693008929 | 1.769372176  | 0.33205852  | 0.457146362 | AC008393.1 |
| ENSG00000273559 | 2.402626059 | 0.693008929 | 1.769372176  | 0.33205852  | 0.457146362 | CWC25      |
| ENSG00000259453 | 2.361041837 | 0.356539013 | 2.614540868  | 0.332113375 | 0.457146362 | AC087286.4 |
| ENSG00000268615 | 2.361041837 | 0.356539013 | 2.614540868  | 0.332113375 | 0.457146362 | AL353803.5 |
| ENSG00000278797 | 2.361041837 | 0.356539013 | 2.614540868  | 0.332113375 | 0.457146362 | AC011551.1 |
| ENSG00000183638 | 2.361041837 | 0.356539013 | 2.614540868  | 0.332113375 | 0.457146362 | RP1L1      |
| ENSG00000182010 | 21.26004646 | 35.30794071 | -0.736271836 | 0.332173016 | 0.457204235 | RTKN2      |
| ENSG00000170289 | 3.310071416 | 1.10029862  | 1.603204448  | 0.332247769 | 0.4572757   | CNGB3      |
| ENSG00000183273 | 2.359788188 | 0.356539013 | 2.613845744  | 0.332260139 | 0.4572757   | CCDC60     |
| ENSG00000226472 | 3.604565913 | 1.069617038 | 1.74956742   | 0.332296297 | 0.457301239 | AC008013.1 |

|                 |             |             |              |             |             |            |
|-----------------|-------------|-------------|--------------|-------------|-------------|------------|
| ENSG00000225706 | 1.229662669 | 4.434316205 | -1.86348764  | 0.332348515 | 0.457348875 | PTPRD-AS1  |
| ENSG00000251689 | 0           | 1.722487775 | -3.370385607 | 0.332420817 | 1           | AC079140.5 |
| ENSG00000257456 | 0           | 1.722487775 | -3.370385607 | 0.332420817 | 1           | AC009320.1 |
| ENSG00000233370 | 0           | 1.722487775 | -3.370385607 | 0.332420817 | 1           | AC140479.3 |
| ENSG00000229172 | 0           | 1.722487775 | -3.370385607 | 0.332420817 | 1           | AC073065.1 |
| ENSG00000273760 | 0           | 1.722487775 | -3.370385607 | 0.332420817 | 1           | AC245041.1 |
| ENSG00000283240 | 0           | 1.722487775 | -3.370385607 | 0.332420817 | 1           | AC007529.2 |
| ENSG00000201579 | 5.058162392 | 2.10970837  | 1.254780992  | 0.332456989 | 0.45747372  | RNU6-343P  |
| ENSG00000263276 | 5.073277448 | 2.191140629 | 1.224726779  | 0.332474454 | 0.45747372  | AC020978.7 |
| ENSG00000071051 | 877.0847678 | 737.8073303 | 0.249815323  | 0.332652632 | 0.457694648 | NCK2       |
| ENSG00000261159 | 11.41278719 | 6.369263301 | 0.837162506  | 0.332694969 | 0.457728659 | AC112484.3 |
| ENSG00000042781 | 6.012206566 | 2.934900236 | 1.049095252  | 0.332733368 | 0.457757248 | USH2A      |
| ENSG00000259138 | 3.330201067 | 1.10029862  | 1.610334998  | 0.332802388 | 0.457827959 | AL049780.2 |
| ENSG00000068394 | 499.0433731 | 592.8526851 | -0.248647033 | 0.332820422 | 0.457828319 | GPLOW      |
| ENSG00000166343 | 84.74651806 | 65.53271004 | 0.373349651  | 0.332837893 | 0.457828319 | MSS51      |
| ENSG00000283138 | 0           | 2.355289417 | -3.821149817 | 0.333005386 | 1           | AC006207.1 |
| ENSG00000108452 | 0           | 2.355289417 | -3.821149817 | 0.333005386 | 1           | ZNF29P     |
| ENSG00000135736 | 369.9064964 | 474.2136504 | -0.358158066 | 0.333050278 | 0.458090333 | CCDC102A   |
| ENSG00000204388 | 8.628950709 | 2.406040094 | 1.831374386  | 0.333063638 | 0.458090333 | HSPA1B     |
| ENSG00000184384 | 577.5019942 | 679.210955  | -0.234062312 | 0.333125513 | 0.45815118  | MAML2      |
| ENSG00000020129 | 854.7553095 | 1108.32809  | -0.374956708 | 0.333175178 | 0.458195231 | NCDN       |
| ENSG00000240857 | 323.5400401 | 373.5155508 | -0.207678873 | 0.333209156 | 0.458217704 | RDH14      |
| ENSG00000280157 | 13.55240252 | 7.256974206 | 0.905818996  | 0.33325088  | 0.458250826 | AL359510.2 |
| ENSG00000177485 | 406.1533533 | 492.3934628 | -0.27722086  | 0.333516916 | 0.458592379 | ZBTB33     |
| ENSG00000237372 | 2.775203133 | 0           | 3.805461913  | 0.333595359 | 0.458606725 | AL606807.1 |
| ENSG00000214039 | 2.775203133 | 0           | 3.805461913  | 0.333595359 | 0.458606725 | LINC02418  |
| ENSG00000287373 | 2.775203133 | 0           | 3.805461913  | 0.333595359 | 0.458606725 | AL122014.1 |
| ENSG00000141858 | 652.8752779 | 755.148911  | -0.209730118 | 0.333597956 | 0.458606725 | SAMD1      |
| ENSG00000157693 | 214.560052  | 157.4815428 | 0.445120331  | 0.33373832  | 0.458775412 | TMEM268    |
| ENSG00000264937 | 3.297463658 | 6.613560079 | -0.991322178 | 0.33391026  | 0.458987486 | AC100830.2 |
| ENSG00000261582 | 2.067800989 | 5.533330555 | -1.405100977 | 0.333943791 | 0.459009291 | AL121753.1 |
| ENSG00000232860 | 21.23712478 | 12.9816675  | 0.713305804  | 0.333983784 | 0.459039978 | SMG7-AS1   |
| ENSG00000149600 | 448.6455812 | 379.9094255 | 0.239607352  | 0.334045139 | 0.459100018 | COMMD7     |
| ENSG00000083123 | 413.4467375 | 339.7504219 | 0.282738454  | 0.334079456 | 0.459122895 | BCKDHB     |
| ENSG00000171295 | 172.1924071 | 144.7133149 | 0.249632783  | 0.334154644 | 0.459201936 | ZNF440     |
| ENSG00000107404 | 2198.185526 | 2581.849062 | -0.23202009  | 0.334191946 | 0.459228907 | DVL1       |
| ENSG00000251126 | 2.763920295 | 0           | 3.799771558  | 0.33433272  | 0.459398053 | AC017007.5 |
| ENSG00000249779 | 1.788421549 | 0.387220594 | 2.214348457  | 0.334347126 | 1           | AC106800.2 |
| ENSG00000137814 | 373.9246697 | 439.0534791 | -0.231722516 | 0.334463853 | 0.459553935 | HAUS2      |
| ENSG00000243304 | 6.302940116 | 3.210006989 | 0.972409626  | 0.334499583 | 0.459578724 | AC008494.1 |
| ENSG00000185112 | 466.1651775 | 792.7612964 | -0.766111878 | 0.334581446 | 0.45966689  | FAM43A     |
| ENSG00000267475 | 16.38054398 | 9.733962468 | 0.739114592  | 0.334669615 | 0.459763709 | AC008736.2 |
| ENSG00000148672 | 1819.490229 | 2126.032562 | -0.224794058 | 0.334697102 | 0.459777158 | GLUD1      |
| ENSG00000112541 | 56.94526555 | 89.97382869 | -0.661973924 | 0.335000865 | 0.460170111 | PDE10A     |
| ENSG00000263766 | 13.08684127 | 8.305366273 | 0.657453439  | 0.335042575 | 0.460203073 | AC025682.1 |
| ENSG00000167987 | 428.7063584 | 492.5574488 | -0.199828612 | 0.335152717 | 0.460330024 | VPS37C     |
| ENSG00000271749 | 0.879722543 | 4.106018629 | -2.206967491 | 0.335173847 | 0.460334711 | AC005828.6 |
| ENSG00000065526 | 1141.904271 | 1399.867237 | -0.293637474 | 0.335449891 | 0.460689482 | SPEN       |
| ENSG00000144057 | 0.921306765 | 4.158053576 | -2.183160048 | 0.335521176 | 0.460763025 | ST6GAL2    |
| ENSG00000102271 | 40.92461962 | 20.87272762 | 0.969188545  | 0.335608741 | 0.460858917 | KLHL4      |
| ENSG00000223442 | 10.18563182 | 5.198144908 | 0.95880446   | 0.335702155 | 0.460944814 | TH2LCRR    |

|                 |             |             |              |             |             |            |
|-----------------|-------------|-------------|--------------|-------------|-------------|------------|
| ENSG0000054392  | 5.175321895 | 10.44588462 | -1.020919689 | 0.335706777 | 0.460944814 | HHAT       |
| ENSG00000232398 | 1.788421549 | 0.356539013 | 2.214322186  | 0.335730587 | 1           | TMPRSS11CP |
| ENSG00000150783 | 1.788421549 | 0.356539013 | 2.214322186  | 0.335730587 | 1           | TEX12      |
| ENSG00000167612 | 2.449224876 | 5.492036488 | -1.164473196 | 0.335780551 | 0.461021746 | ANKRD33    |
| ENSG00000202343 | 7.024203668 | 3.546476906 | 0.977066017  | 0.335806924 | 0.461033591 | RF00410    |
| ENSG00000234185 | 0.894837599 | 2.842855491 | -1.662228368 | 0.336024713 | 0.461286344 | AC068533.3 |
| ENSG00000284874 | 13.2565831  | 7.988965452 | 0.736792503  | 0.336026533 | 0.461286344 | AC000093.1 |
| ENSG00000254274 | 0.293240848 | 2.852312101 | -3.132255861 | 0.336289672 | 0.461623182 | TDFG1P5    |
| ENSG00000251079 | 1.541779519 | 5.298490388 | -1.788966517 | 0.336323315 | 0.461644972 | BMS1P2     |
| ENSG00000237082 | 6.062637601 | 2.934900236 | 1.05836598   | 0.336404752 | 0.461712047 | COX5BP6    |
| ENSG00000287808 | 23.43469303 | 14.70659542 | 0.666143075  | 0.336407723 | 0.461712047 | AL355999.1 |
| ENSG00000187555 | 1842.643495 | 2077.248907 | -0.172801416 | 0.336429073 | 0.461716959 | USP7       |
| ENSG00000227193 | 0           | 1.762625967 | -3.401008363 | 0.336433782 | 1           | AC244453.1 |
| ENSG00000237001 | 0           | 1.762625967 | -3.401008363 | 0.336433782 | 1           | WASF3-AS1  |
| ENSG00000227227 | 0           | 1.762625967 | -3.401008363 | 0.336433782 | 1           | AC017101.1 |
| ENSG00000223039 | 0           | 1.762625967 | -3.401008363 | 0.336433782 | 1           | RN7SKP268  |
| ENSG00000162923 | 1975.230722 | 2348.274609 | -0.249442452 | 0.336553259 | 0.461862995 | WDR26      |
| ENSG00000105523 | 0.922560414 | 2.822786395 | -1.62823606  | 0.336706407 | 0.46204876  | FAM83E     |
| ENSG00000230847 | 0           | 2.323323566 | -3.792455617 | 0.336747267 | 1           | OCLNP1     |
| ENSG00000287622 | 0           | 2.323323566 | -3.792455617 | 0.336747267 | 1           | AC068787.5 |
| ENSG00000243016 | 0           | 2.323323566 | -3.792455617 | 0.336747267 | 1           | AC112482.1 |
| ENSG00000144369 | 103.7904325 | 168.6439259 | -0.700978863 | 0.336793042 | 0.462143236 | FAM171B    |
| ENSG00000250658 | 2.753819833 | 0.713078025 | 1.942003789  | 0.336958068 | 0.462345264 | AC097652.1 |
| ENSG00000281469 | 4.810266713 | 1.813376645 | 1.413245729  | 0.336988292 | 0.462362316 | AC019226.1 |
| ENSG00000280291 | 4.150717034 | 1.130980201 | 1.899747816  | 0.337134646 | 0.462538693 | AC016251.2 |
| ENSG00000173992 | 824.374713  | 712.2215153 | 0.211147635  | 0.337265261 | 0.462693461 | CCS        |
| ENSG00000137507 | 555.3648281 | 891.4877472 | -0.682968892 | 0.337307941 | 0.462705999 | LRRC32     |
| ENSG00000169714 | 5820.474174 | 5143.347264 | 0.178386473  | 0.33731002  | 0.462705999 | CNBP       |
| ENSG00000231443 | 9.080721818 | 4.485066883 | 1.001677816  | 0.337407685 | 0.462815536 | AC124944.1 |
| ENSG00000218052 | 12.18197448 | 19.6885566  | -0.69481656  | 0.337507238 | 0.462910355 | ADAMTS7P4  |
| ENSG00000224658 | 0.586481695 | 3.005720009 | -2.336663617 | 0.337512446 | 0.462910355 | AL513164.1 |
| ENSG00000138061 | 4736.914703 | 2541.532881 | 0.898224188  | 0.33756557  | 0.462958777 | CYP1B1     |
| ENSG00000101104 | 498.908836  | 637.8067812 | -0.354447931 | 0.337696608 | 0.463114044 | PABPC1L    |
| ENSG00000243759 | 4.911057511 | 9.723221588 | -0.988978137 | 0.338186876 | 0.463761915 | ST13P15    |
| ENSG00000102984 | 47.25360197 | 35.98160405 | 0.3972436    | 0.338368359 | 0.463986296 | ZNF821     |
| ENSG00000273002 | 16.6183392  | 23.92906991 | -0.521979456 | 0.338463779 | 0.464092645 | AL355388.2 |
| ENSG00000235919 | 24.23278551 | 32.78233794 | -0.435005338 | 0.338550334 | 0.464161461 | ASH1L-AS1  |
| ENSG00000257896 | 2.699627853 | 6.074087452 | -1.167174569 | 0.338558273 | 0.464161461 | AC093012.1 |
| ENSG00000091073 | 115.5765522 | 154.3115456 | -0.418265227 | 0.338567562 | 0.464161461 | DTX2       |
| ENSG00000126106 | 159.9317802 | 131.6370341 | 0.280967146  | 0.338656621 | 0.464259058 | TMEM53     |
| ENSG00000116745 | 3.686480708 | 0.672939833 | 2.424420158  | 0.338814837 | 0.464451447 | RPE65      |
| ENSG00000132002 | 2291.450077 | 1858.65034  | 0.30194192   | 0.338843786 | 0.464466624 | DNAJB1     |
| novel.546       | 349.9139243 | 236.0068496 | 0.567421632  | 0.338895994 | 0.464498872 | -          |
| novel.1107      | 4.269130186 | 8.194408307 | -0.94562788  | 0.338918928 | 0.464498872 | -          |
| ENSG00000186160 | 3.685155788 | 0.672939833 | 2.423918575  | 0.338920947 | 0.464498872 | CYP4Z1     |
| ENSG00000224549 | 3.225649323 | 0.387220594 | 3.063496021  | 0.338984257 | 0.464548215 | AC017067.1 |
| ENSG00000287966 | 4.5888402   | 1.426156051 | 1.680641365  | 0.33899271  | 0.464548215 | AL590062.1 |
| ENSG00000144061 | 154.1660735 | 127.9879    | 0.268770546  | 0.339028337 | 0.464572533 | NPHP1      |
| ENSG00000155256 | 868.166737  | 733.3419945 | 0.243929239  | 0.33915813  | 0.464725877 | ZFYVE27    |
| ENSG00000119725 | 27.41058237 | 19.26004194 | 0.507872581  | 0.339305058 | 0.464883665 | ZNF410     |
| ENSG00000188032 | 0.600343103 | 2.679862578 | -2.141602321 | 0.339309069 | 0.464883665 | C19orf67   |

|                 |             |             |              |             |             |               |
|-----------------|-------------|-------------|--------------|-------------|-------------|---------------|
| ENSG00000008324 | 230.4487515 | 276.9217063 | -0.26575012  | 0.33935565  | 0.464922967 | SS18L2        |
| ENSG00000136888 | 1273.804779 | 1540.297781 | -0.27417036  | 0.339426471 | 0.464995473 | ATP6V1G1      |
| ENSG00000274297 | 4.576232441 | 1.426156051 | 1.677051518  | 0.339469003 | 0.465029219 | AC009269.5    |
| ENSG00000146587 | 425.3075623 | 368.5354218 | 0.207173806  | 0.339546135 | 0.465110357 | RBAK          |
| ENSG00000084733 | 2737.784728 | 3048.170157 | -0.154935721 | 0.339568863 | 0.465114875 | RAB10         |
| ENSG00000189403 | 7116.945851 | 8302.442016 | -0.222316032 | 0.33959896  | 0.465114875 | HMGB1         |
| novel.942       | 27.63555636 | 104.8743429 | -1.923534504 | 0.339620839 | 0.465114875 | -             |
| ENSG00000280392 | 1.203193503 | 3.555933516 | -1.562908654 | 0.339621042 | 0.465114875 | AC007496.3    |
| ENSG00000260290 | 2.43410982  | 5.02453951  | -1.048244696 | 0.339803207 | 0.465339823 | AC092115.1    |
| ENSG00000173588 | 295.6338245 | 238.5978995 | 0.30926018   | 0.340020967 | 0.46561349  | CEP83         |
| ENSG00000267179 | 2.991615051 | 1.080229524 | 1.475652318  | 0.340116265 | 0.465703322 | AC008770.2    |
| ENSG00000167671 | 2222.068606 | 2614.514312 | -0.234550085 | 0.340122418 | 0.465703322 | UBXN6         |
| novel.395       | 17.68202098 | 25.83346382 | -0.549148303 | 0.340176157 | 0.465752357 | -             |
| ENSG00000225169 | 3.576843098 | 1.00940975  | 1.794446256  | 0.340225125 | 0.465794855 | BRI3P1        |
| ENSG00000143774 | 4317.519909 | 5005.745693 | -0.213419603 | 0.340283719 | 0.465850527 | GUK1          |
| ENSG00000187097 | 337.6197608 | 411.269203  | -0.285258912 | 0.340310912 | 0.465863207 | ENTPD5        |
| ENSG00000272109 | 2.989107754 | 1.080229524 | 1.474721879  | 0.340374597 | 0.465918208 | AC008906.2    |
| ENSG00000280385 | 8.093868963 | 4.340987191 | 0.905389617  | 0.340386956 | 0.465918208 | AP000648.3    |
| ENSG00000235100 | 6.051283491 | 2.475703993 | 1.282342717  | 0.340521143 | 0.466077327 | AL157400.3    |
| ENSG00000217555 | 12.97595001 | 8.203864917 | 0.659349675  | 0.340628522 | 0.466199739 | CKLF          |
| ENSG00000130699 | 47.47252119 | 61.51770867 | -0.373152926 | 0.340671616 | 0.466234159 | TAF4          |
| ENSG00000073711 | 223.751211  | 296.8762382 | -0.40741677  | 0.340794028 | 0.466377121 | PPP2R3A       |
| ENSG00000068781 | 2.153476731 | 0.387220594 | 2.476270874  | 0.340904455 | 1           | STON1-GTF2A1L |
| ENSG00000251537 | 2.153476731 | 0.387220594 | 2.476270874  | 0.340904455 | 1           | AC005324.3    |
| ENSG00000151413 | 204.2681604 | 250.4393529 | -0.294742521 | 0.340925988 | 0.466533135 | NUBPL         |
| ENSG00000225518 | 4.598940661 | 9.111773312 | -0.996195083 | 0.340962146 | 0.466558041 | LINC01703     |
| ENSG00000213563 | 590.022757  | 492.2937249 | 0.261362787  | 0.340994729 | 0.466578052 | C8orf82       |
| novel.689       | 0.615458159 | 3.484985349 | -2.499845692 | 0.341032362 | 0.466604972 | -             |
| ENSG00000243071 | 8.193406112 | 4.697526203 | 0.805501174  | 0.341073186 | 0.466636252 | AC107032.1    |
| ENSG00000101247 | 213.2193997 | 255.5300415 | -0.261847873 | 0.341127747 | 0.466686325 | NDUFAF5       |
| ENSG00000270823 | 3.072276198 | 0.693008929 | 2.127261832  | 0.341222399 | 0.466791236 | AC007938.2    |
| ENSG00000255306 | 21.8840667  | 13.93074157 | 0.660032064  | 0.341444787 | 0.467068437 | AC004923.4    |
| ENSG00000223113 | 0           | 1.733100261 | -3.378132116 | 0.341451561 | 1           | RNA5SP247     |
| ENSG00000229228 | 0           | 1.733100261 | -3.378132116 | 0.341451561 | 1           | LINC00582     |
| ENSG00000251320 | 0           | 1.733100261 | -3.378132116 | 0.341451561 | 1           | AC011352.3    |
| ENSG00000287974 | 0           | 1.733100261 | -3.378132116 | 0.341451561 | 1           | Z84486.1      |
| ENSG00000127329 | 308.426341  | 192.7411726 | 0.677459466  | 0.341460987 | 0.467068437 | PTPRB         |
| ENSG00000228686 | 4.202401718 | 1.436768536 | 1.55016161   | 0.341497862 | 0.46708248  | AL590723.1    |
| ENSG00000172113 | 353.8356057 | 415.3803119 | -0.231894684 | 0.341507208 | 0.46708248  | NME6          |
| ENSG00000185722 | 1233.685963 | 1411.824938 | -0.194616105 | 0.341538949 | 0.467101302 | ANKFY1        |
| ENSG00000286205 | 0.879722543 | 3.159256312 | -1.833723931 | 0.341694796 | 0.467289846 | AC139887.5    |
| ENSG00000140379 | 53.19288275 | 103.4906368 | -0.959363639 | 0.341745804 | 0.467335004 | BCL2A1        |
| ENSG00000277855 | 3.269740843 | 1.029478846 | 1.644580066  | 0.341809022 | 0.467396852 | AC097634.3    |
| ENSG00000154813 | 683.8913509 | 806.7179458 | -0.238695168 | 0.341874989 | 0.467462454 | DPH3          |
| ENSG00000185650 | 7560.71537  | 6026.433049 | 0.32726949   | 0.341954504 | 0.467523563 | ZFP36L1       |
| ENSG00000081177 | 624.0921158 | 550.1984565 | 0.182033475  | 0.34195567  | 0.467523563 | EXD2          |
| ENSG00000272256 | 7.80564271  | 1.936102971 | 2.029302254  | 0.342100082 | 0.467696391 | AC044849.1    |
| ENSG00000233762 | 347.3829543 | 439.0386546 | -0.338282363 | 0.342176371 | 0.467776074 | AC007969.1    |
| ENSG00000278467 | 10.59603217 | 6.440083075 | 0.716450313  | 0.342211813 | 0.467799911 | AC138393.3    |
| ENSG00000141622 | 36.753346   | 63.86516407 | -0.79546948  | 0.342255661 | 0.467835235 | RNF165        |
| ENSG00000171055 | 1640.037058 | 2165.519272 | -0.401115822 | 0.342289495 | 0.467852325 | FEZ2          |

|                 |             |             |              |             |             |            |
|-----------------|-------------|-------------|--------------|-------------|-------------|------------|
| ENSG00000166426 | 14.45748277 | 6.370419176 | 1.178181872  | 0.342304178 | 0.467852325 | CRABP1     |
| ENSG00000260209 | 2.153476731 | 0.356539013 | 2.476287319  | 0.342331634 | 1           | AP000842.3 |
| ENSG00000271732 | 2.153476731 | 0.356539013 | 2.476287319  | 0.342331634 | 1           | AL137798.1 |
| ENSG00000267197 | 1.510295757 | 3.566546002 | -1.241056324 | 0.342344721 | 0.467883124 | AC011461.1 |
| ENSG00000230715 | 155.2534758 | 110.8007203 | 0.487836431  | 0.342380561 | 0.467885413 | AC018638.2 |
| ENSG00000249487 | 4.816606227 | 1.406086955 | 1.768130265  | 0.342382413 | 0.467885413 | LINC01586  |
| ENSG00000197847 | 10.26880026 | 6.094156548 | 0.752899599  | 0.342407382 | 0.467894925 | SLC22A20P  |
| ENSG00000228221 | 8.992538779 | 3.404837359 | 1.38738494   | 0.342553385 | 0.468069817 | LINC00578  |
| ENSG00000275155 | 1.215801261 | 3.139187216 | -1.381718298 | 0.342629005 | 0.468148524 | AC027348.1 |
| ENSG00000124613 | 81.80526277 | 62.31093468 | 0.394843595  | 0.342676779 | 0.468171798 | ZNF391     |
| ENSG00000236792 | 1.525410814 | 3.627909165 | -1.250342324 | 0.342682078 | 0.468171798 | AL513175.2 |
| ENSG00000068724 | 776.8038801 | 895.1246896 | -0.204661791 | 0.342732624 | 0.468216233 | TTC7A      |
| ENSG00000234906 | 2.639167628 | 0           | 3.73530758   | 0.342760157 | 1           | APOC2      |
| ENSG00000224239 | 2.639167628 | 0           | 3.73530758   | 0.342760157 | 1           | AC090044.1 |
| ENSG00000211697 | 2.639167628 | 0           | 3.73530758   | 0.342760157 | 1           | TRGV5      |
| ENSG00000287736 | 2.639167628 | 0           | 3.73530758   | 0.342760157 | 1           | AF305872.2 |
| ENSG00000263924 | 2.639167628 | 0           | 3.73530758   | 0.342760157 | 1           | AC022960.1 |
| ENSG00000232382 | 2.639167628 | 0           | 3.73530758   | 0.342760157 | 1           | OR5K1      |
| ENSG00000275516 | 2.639167628 | 0           | 3.73530758   | 0.342760157 | 1           | AC100791.3 |
| ENSG00000228764 | 2.639167628 | 0           | 3.73530758   | 0.342760157 | 1           | ZNF885P    |
| ENSG00000228509 | 3.020591515 | 1.049547942 | 1.507784565  | 0.3427693   | 0.468241715 | AC006460.1 |
| ENSG00000257446 | 5.501371423 | 2.10970837  | 1.372032131  | 0.342789069 | 0.468244101 | ZNF878     |
| ENSG00000264370 | 6.065144898 | 2.475703993 | 1.285317435  | 0.342859982 | 0.468316344 | MIR3125    |
| ENSG00000239920 | 5.689989255 | 2.169915658 | 1.395073071  | 0.342883553 | 0.468323919 | AC104389.4 |
| ENSG00000287009 | 1.524157165 | 3.546476906 | -1.227748907 | 0.34290577  | 0.468329644 | AC021037.1 |
| ENSG00000259540 | 4.803998469 | 1.702418679 | 1.473537734  | 0.342934094 | 0.468343708 | AC027020.1 |
| ENSG00000255337 | 14.28125923 | 8.416324238 | 0.769063806  | 0.342976218 | 0.468376616 | AP001830.1 |
| ENSG00000128602 | 436.8643457 | 609.6421945 | -0.480879321 | 0.343028183 | 0.468422959 | SMO        |
| ENSG00000259414 | 3.579350395 | 0.774441189 | 2.243670681  | 0.343071295 | 0.468446497 | AC242376.1 |
| ENSG00000148204 | 3.299970955 | 1.130980201 | 1.576327907  | 0.343099511 | 0.468446497 | CRB2       |
| ENSG00000182885 | 3.299970955 | 1.130980201 | 1.576327907  | 0.343099511 | 0.468446497 | ADGRG3     |
| ENSG00000072506 | 963.71953   | 1174.795353 | -0.286013445 | 0.343136011 | 0.468471713 | HSD17B10   |
| ENSG00000287849 | 2.153476731 | 0.336469917 | 2.476298126  | 0.343275838 | 1           | AC079148.2 |
| ENSG00000233163 | 2.153476731 | 0.336469917 | 2.476298126  | 0.343275838 | 1           | RPS12P17   |
| ENSG00000114098 | 643.0352558 | 760.2484739 | -0.241751279 | 0.343366302 | 0.468761488 | ARMC8      |
| ENSG00000279879 | 4.251507832 | 1.722487775 | 1.27804678   | 0.343399718 | 0.468777264 | AC091152.4 |
| ENSG00000186665 | 194.9761834 | 154.237177  | 0.33684715   | 0.343413943 | 0.468777264 | C17orf58   |
| ENSG00000176978 | 2691.032112 | 2158.962771 | 0.317956485  | 0.343536632 | 0.468920103 | DPP7       |
| ENSG00000099337 | 463.9809199 | 307.6373119 | 0.592181184  | 0.343589641 | 0.468967821 | KCNK6      |
| ENSG00000128191 | 712.2105502 | 892.0647044 | -0.324681484 | 0.343642192 | 0.469014908 | DGCR8      |
| ENSG00000242252 | 6.023560676 | 2.649180997 | 1.210175036  | 0.343710255 | 0.469077898 | BGLAP      |
| ENSG00000231395 | 4.175932552 | 1.456837632 | 1.528870724  | 0.343724454 | 0.469077898 | ARL4AP4    |
| ENSG00000159904 | 3.883945353 | 1.396630344 | 1.463693055  | 0.343786643 | 0.469138126 | ZNF890P    |
| ENSG00000100814 | 620.8386884 | 750.1094739 | -0.272518176 | 0.343943383 | 0.469322792 | CCNB1IP1   |
| ENSG00000187908 | 1.493927053 | 4.096562019 | -1.439528661 | 0.343958096 | 0.469322792 | DMBT1      |
| ENSG00000259868 | 5.102253911 | 2.099095884 | 1.269785297  | 0.343977465 | 0.469324574 | AL163952.1 |
| ENSG00000048052 | 717.3869805 | 510.4319612 | 0.491434057  | 0.344006937 | 0.469340137 | HDAC9      |
| ENSG00000271816 | 5.980722805 | 11.39136267 | -0.920970786 | 0.344087589 | 0.469425523 | AC022400.5 |
| ENSG00000083828 | 136.4033482 | 107.4171079 | 0.346172992  | 0.344161306 | 0.469501438 | ZNF586     |
| ENSG00000286729 | 2.406387005 | 5.778911602 | -1.259759009 | 0.344242418 | 0.469579012 | AC137695.3 |
| ENSG00000278642 | 1.539272221 | 3.944309986 | -1.366100443 | 0.344261697 | 0.469579012 | AC015813.4 |

|                 |             |             |              |             |             |            |
|-----------------|-------------|-------------|--------------|-------------|-------------|------------|
| ENSG00000119333 | 995.1615193 | 1199.050152 | -0.269113125 | 0.344272392 | 0.469579012 | WDR34      |
| ENSG00000183726 | 2325.595819 | 2617.271684 | -0.170504785 | 0.344302625 | 0.469595596 | TMEM50A    |
| ENSG00000259762 | 2.435363469 | 0.723690511 | 1.755570455  | 0.344351457 | 0.469637544 | AC021739.5 |
| ENSG00000223551 | 5.155192243 | 2.120320855 | 1.274168962  | 0.344466875 | 0.469770294 | TMSB4XP4   |
| ENSG00000054282 | 94.00812201 | 63.93847117 | 0.558681602  | 0.344528459 | 0.469829618 | SDCCAG8    |
| ENSG00000279894 | 10.2612071  | 6.206270388 | 0.735568484  | 0.344593432 | 0.469893558 | Z73965.1   |
| ENSG00000200913 | 2.96013129  | 7.063428106 | -1.250247072 | 0.344690987 | 0.470001918 | SNORD46    |
| ENSG00000103168 | 1023.808705 | 843.050695  | 0.280186885  | 0.344763372 | 0.470065741 | TAF1C      |
| ENSG00000262874 | 3.385646697 | 0.713078025 | 2.241378029  | 0.344782739 | 0.470065741 | C19orf84   |
| ENSG00000226310 | 5.15895319  | 2.486316478 | 1.045433325  | 0.344806781 | 0.470065741 | AL022157.1 |
| ENSG00000236519 | 2.743719372 | 5.706935953 | -1.062015409 | 0.344810165 | 0.470065741 | LINC01424  |
| ENSG00000123552 | 310.1075338 | 384.9076366 | -0.311729319 | 0.344878233 | 0.470119989 | USP45      |
| ENSG00000125447 | 714.0721656 | 813.5723222 | -0.188235143 | 0.344886147 | 0.470119989 | GGA3       |
| ENSG00000165516 | 692.014438  | 592.2593666 | 0.22487531   | 0.345048385 | 0.470316463 | KLHDC2     |
| ENSG00000116544 | 9.93898979  | 4.414247109 | 1.154566573  | 0.345079842 | 0.470319349 | DLGAP3     |
| ENSG00000165084 | 1.848881773 | 5.216929734 | -1.496196579 | 0.345109951 | 0.470319349 | C8orf34    |
| ENSG00000228554 | 2.405133356 | 0.743759607 | 1.720596998  | 0.345115294 | 0.470319349 | AC004837.2 |
| ENSG0000008086  | 154.7800211 | 192.1050193 | -0.311333309 | 0.345139214 | 0.470319349 | CDKL5      |
| ENSG00000112245 | 6.948628387 | 11.39264694 | -0.715405208 | 0.345141015 | 0.470319349 | PTP4A1     |
| ENSG00000285108 | 2.127007565 | 4.881744087 | -1.209069299 | 0.345159314 | 0.470319617 | AC103718.1 |
| ENSG00000259563 | 2.402626059 | 0.743759607 | 1.719415854  | 0.345415627 | 0.470644189 | AC025430.1 |
| ENSG00000243960 | 6.986451663 | 3.2194636   | 1.11498748   | 0.345501368 | 0.470736328 | AL390195.1 |
| ENSG00000250746 | 2.094270155 | 5.176791542 | -1.293244782 | 0.345572249 | 0.470787387 | AC105250.1 |
| ENSG00000278733 | 3.031945625 | 1.049547942 | 1.512376792  | 0.345595281 | 0.470787387 | AC022079.2 |
| novel.1005      | 3.685227059 | 14.41270384 | -1.970674328 | 0.34560911  | 0.470787387 | -          |
| ENSG00000120008 | 1186.519974 | 1351.05099  | -0.187265526 | 0.345611325 | 0.470787387 | WDR11      |
| ENSG00000141503 | 1912.673242 | 2390.618238 | -0.321653047 | 0.345641944 | 0.470804411 | MINK1      |
| ENSG00000266783 | 2.682005499 | 5.676254372 | -1.077908124 | 0.345705405 | 0.470856101 | AP005136.2 |
| ENSG00000256789 | 0.616711807 | 2.506385574 | -2.033791117 | 0.345716138 | 0.470856101 | AP000753.2 |
| ENSG00000148719 | 1283.394402 | 1105.866513 | 0.214523056  | 0.345756686 | 0.470886641 | DNAJB12    |
| ENSG00000261056 | 6.594927315 | 2.812173909 | 1.22217974   | 0.345775944 | 0.470888185 | AC079416.1 |
| novel.528       | 7.726306483 | 14.43850514 | -0.896568613 | 0.345961441 | 0.471116106 | -          |
| ENSG00000102103 | 646.951068  | 754.689214  | -0.222408962 | 0.34599711  | 0.471139985 | PQBP1      |
| ENSG00000197019 | 699.4795002 | 550.2620286 | 0.345702198  | 0.346167307 | 0.471347036 | SERTAD1    |
| ENSG00000047932 | 1235.569959 | 1433.29605  | -0.214015244 | 0.346263446 | 0.471453233 | GOPC       |
| ENSG00000252614 | 2.113146158 | 0.387220594 | 2.451758461  | 0.346265324 | 1           | RNU6-807P  |
| ENSG00000278763 | 17.10682213 | 8.255899865 | 1.041360476  | 0.346355351 | 0.471553654 | FAM27B     |
| ENSG00000250635 | 3.052075276 | 1.080229524 | 1.498320793  | 0.346399727 | 0.471567062 | CXXC5-AS1  |
| ENSG00000167930 | 2490.632641 | 2080.943151 | 0.259420515  | 0.346401501 | 0.471567062 | FAM234A    |
| ENSG00000164548 | 1588.717    | 1372.838189 | 0.210665993  | 0.346601953 | 0.471815223 | TRA2A      |
| ENSG00000244045 | 223.1182011 | 187.4125961 | 0.250450705  | 0.346633937 | 0.47183404  | TMEM199    |
| ENSG00000172171 | 108.8978161 | 129.5699041 | -0.251187533 | 0.346698307 | 0.471896936 | TEFM       |
| novel.444       | 8.850519764 | 20.77683007 | -1.230004509 | 0.346718882 | 0.471900218 | -          |
| ENSG00000204592 | 0           | 1.702418679 | -3.354504949 | 0.346727694 | 1           | HLA-E      |
| ENSG00000285545 | 0           | 1.702418679 | -3.354504949 | 0.346727694 | 1           | AC124798.2 |
| ENSG00000288080 | 0           | 1.702418679 | -3.354504949 | 0.346727694 | 1           | AC005104.3 |
| ENSG00000275987 | 0           | 1.702418679 | -3.354504949 | 0.346727694 | 1           | RF00003    |
| ENSG00000229156 | 0           | 1.702418679 | -3.354504949 | 0.346727694 | 1           | CR769776.2 |
| ENSG00000242550 | 0           | 1.702418679 | -3.354504949 | 0.346727694 | 1           | SERPINB10  |
| ENSG00000177879 | 1085.686507 | 1315.031128 | -0.276382528 | 0.346775378 | 0.471952389 | AP3S1      |
| ENSG00000239040 | 2.668144092 | 6.205114513 | -1.20586765  | 0.346829953 | 0.472001938 | RF00019    |

|                 |             |             |              |             |             |            |
|-----------------|-------------|-------------|--------------|-------------|-------------|------------|
| ENSG00000162929 | 235.222635  | 293.7396795 | -0.320915664 | 0.346965638 | 0.472161861 | KIAA1841   |
| ENSG00000258752 | 2.752566185 | 0.713078025 | 1.941687895  | 0.34701098  | 0.472198831 | AL357093.2 |
| ENSG00000089127 | 1070.90713  | 767.227109  | 0.480842608  | 0.347066207 | 0.472249248 | AC004551.1 |
| ENSG00000268836 | 4.83548223  | 2.079026788 | 1.198161383  | 0.347262548 | 0.472491661 | Z69706.1   |
| ENSG00000240877 | 4.514518568 | 2.160459047 | 1.067627467  | 0.347353346 | 0.472590452 | RN7SL521P  |
| ENSG00000144031 | 39.49803429 | 27.23227752 | 0.53994372   | 0.347409877 | 0.472642615 | ANKRD53    |
| ENSG00000141748 | 1.846374476 | 0           | 3.216940164  | 0.347413624 | 1           | ARL5C      |
| ENSG00000163421 | 1.846374476 | 0           | 3.216940164  | 0.347413624 | 1           | PROK2      |
| ENSG00000285883 | 1.846374476 | 0           | 3.216940164  | 0.347413624 | 1           | AC123784.1 |
| ENSG00000182035 | 1.846374476 | 0           | 3.216940164  | 0.347413624 | 1           | ADIG       |
| ENSG00000280037 | 1.846374476 | 0           | 3.216940164  | 0.347413624 | 1           | AC092653.2 |
| ENSG00000279928 | 1.846374476 | 0           | 3.216940164  | 0.347413624 | 1           | FO538757.1 |
| ENSG00000253116 | 1.846374476 | 0           | 3.216940164  | 0.347413624 | 1           | AC027698.1 |
| ENSG00000280485 | 1.846374476 | 0           | 3.216940164  | 0.347413624 | 1           | AL358154.1 |
| ENSG00000265033 | 1.846374476 | 0           | 3.216940164  | 0.347413624 | 1           | RN7SL262P  |
| ENSG00000196408 | 1.846374476 | 0           | 3.216940164  | 0.347413624 | 1           | NOXO1      |
| ENSG00000154305 | 1067.020769 | 1205.569527 | -0.176162684 | 0.347457982 | 0.472683309 | MIA3       |
| ENSG00000117151 | 171.6674967 | 204.0193475 | -0.249198282 | 0.347618556 | 0.472876994 | CTBS       |
| ENSG00000117262 | 145.8899262 | 190.1132169 | -0.383131596 | 0.34764437  | 0.472887349 | GPR89A     |
| ENSG00000261693 | 2.113146158 | 0.356539013 | 2.451755311  | 0.34772756  | 1           | AC134682.1 |
| ENSG00000260926 | 2.113146158 | 0.356539013 | 2.451755311  | 0.34772756  | 1           | AC016134.1 |
| ENSG00000258955 | 5.688735607 | 13.38767293 | -1.229379344 | 0.348127728 | 0.473520051 | LINC00519  |
| ENSG00000248196 | 2.155984028 | 0.356539013 | 2.477867472  | 0.348130964 | 1           | AC092658.1 |
| ENSG00000196655 | 2.155984028 | 0.356539013 | 2.477867472  | 0.348130964 | 1           | TRAPPC4    |
| ENSG00000259831 | 2.155984028 | 0.356539013 | 2.477867472  | 0.348130964 | 1           | LINC00567  |
| ENSG00000210154 | 15.08157427 | 10.01839744 | 0.589946431  | 0.348209909 | 0.473607038 | MT-TD      |
| novel.876       | 0.616711807 | 4.374108917 | -2.835546619 | 0.348250359 | 0.47363726  | -          |
| ENSG00000164512 | 2.098031101 | 0.387220594 | 2.442488558  | 0.348307533 | 1           | ANKRD55    |
| ENSG00000286854 | 2.098031101 | 0.387220594 | 2.442488558  | 0.348307533 | 1           | AC079382.2 |
| ENSG00000151414 | 2081.522521 | 1539.856683 | 0.434672865  | 0.34844261  | 0.473873924 | NEK7       |
| ENSG00000262678 | 2.961384939 | 6.836760279 | -1.199016595 | 0.348495226 | 0.473920674 | AC004771.5 |
| ENSG00000224976 | 2.152223082 | 0.356539013 | 2.47560051   | 0.34862938  | 1           | PARP4P2    |
| ENSG00000172831 | 573.5566197 | 679.8979878 | -0.245771824 | 0.348742857 | 0.474232606 | CES2       |
| ENSG00000228677 | 2.094270155 | 0.387220594 | 2.440185587  | 0.348816947 | 1           | TTC3-AS1   |
| ENSG00000184492 | 5.792033702 | 2.802717299 | 1.031517153  | 0.348908608 | 0.474412641 | FOXD4L1    |
| ENSG00000182149 | 2372.492956 | 2111.605767 | 0.16814456   | 0.348911772 | 0.474412641 | IST1       |
| novel.1117      | 13.067894   | 7.968896356 | 0.71655563   | 0.349005809 | 0.474515669 | -          |
| ENSG00000235726 | 2.155984028 | 0.336469917 | 2.477878437  | 0.349053367 | 1           | AC010148.1 |
| ENSG00000279162 | 6.918398275 | 3.587770973 | 0.949405404  | 0.349119181 | 0.474644973 | AC141586.5 |
| ENSG00000287431 | 57.15483976 | 73.87034613 | -0.372745802 | 0.349158134 | 0.474673093 | AC027601.6 |
| ENSG00000255933 | 6.372247153 | 2.659793482 | 1.283035783  | 0.349508278 | 0.475124245 | AC117500.2 |
| ENSG00000263326 | 7.475903507 | 3.300895859 | 1.189093799  | 0.349550006 | 0.475156108 | AC133552.4 |
| ENSG00000163064 | 62.1817315  | 95.8774744  | -0.625500973 | 0.349606497 | 0.475199605 | EN1        |
| ENSG00000128731 | 420.0985772 | 356.8718589 | 0.235447106  | 0.349633862 | 0.475199605 | HERC2      |
| ENSG00000204642 | 6.46293749  | 2.466247382 | 1.380599214  | 0.349636875 | 0.475199605 | HLA-F      |
| novel.396       | 7.929141728 | 4.230029225 | 0.895647027  | 0.349671018 | 0.47522115  | -          |
| ENSG00000161055 | 3.96328158  | 1.10029862  | 1.85698294   | 0.349731083 | 0.475258752 | SCGB3A1    |
| ENSG00000141446 | 348.5169399 | 288.7276663 | 0.272336752  | 0.349735271 | 0.475258752 | ESCO1      |
| ENSG00000128791 | 1568.656576 | 1993.928335 | -0.346210301 | 0.349776709 | 0.475290202 | TWSG1      |
| ENSG00000236878 | 2.098031101 | 0.356539013 | 2.442477507  | 0.349783232 | 1           | MTATP6P2B  |
| ENSG00000270040 | 2.098031101 | 0.356539013 | 2.442477507  | 0.349783232 | 1           | AL356055.1 |

|                 |             |             |              |             |             |            |
|-----------------|-------------|-------------|--------------|-------------|-------------|------------|
| ENSG00000173862 | 2.098031101 | 0.356539013 | 2.442477507  | 0.349783232 | 1           | AC008080.1 |
| ENSG00000246582 | 10.67160745 | 16.1019415  | -0.597317424 | 0.349807807 | 0.475307601 | AC100861.1 |
| ENSG00000187546 | 13.79306104 | 34.04837359 | -1.306220075 | 0.35007047  | 0.475639624 | AGMO       |
| ENSG00000163380 | 7.946764082 | 3.505182839 | 1.170267734  | 0.350103617 | 0.475659786 | LMOD3      |
| ENSG00000234147 | 5.539123428 | 1.742556871 | 1.655589996  | 0.350136254 | 0.475663064 | AL035446.1 |
| ENSG00000153574 | 320.2889183 | 390.8823249 | -0.287952136 | 0.350157875 | 0.475663064 | RPIA       |
| ENSG00000197275 | 18.46979954 | 26.80157951 | -0.538311657 | 0.350160955 | 0.475663064 | RAD54B     |
| ENSG00000263961 | 1.847628125 | 0           | 3.217876757  | 0.350224024 | 1           | RHEX       |
| ENSG00000269736 | 1.847628125 | 0           | 3.217876757  | 0.350224024 | 1           | AC010319.5 |
| ENSG00000094755 | 1.847628125 | 0           | 3.217876757  | 0.350224024 | 1           | GABRP      |
| ENSG00000211653 | 1.847628125 | 0           | 3.217876757  | 0.350224024 | 1           | IGLV1-40   |
| novel.897       | 1.847628125 | 0           | 3.217876757  | 0.350224024 | 1           | -          |
| ENSG00000265215 | 1.847628125 | 0           | 3.217876757  | 0.350224024 | 1           | MIR4269    |
| ENSG00000287097 | 1.847628125 | 0           | 3.217876757  | 0.350224024 | 1           | AL590550.1 |
| ENSG00000258551 | 1.847628125 | 0           | 3.217876757  | 0.350224024 | 1           | AC104035.1 |
| ENSG00000226004 | 1.847628125 | 0           | 3.217876757  | 0.350224024 | 1           | AL591468.1 |
| ENSG00000156269 | 1.847628125 | 0           | 3.217876757  | 0.350224024 | 1           | NAA11      |
| ENSG00000286697 | 1.847628125 | 0           | 3.217876757  | 0.350224024 | 1           | AC092623.1 |
| ENSG00000227508 | 1.847628125 | 0           | 3.217876757  | 0.350224024 | 1           | LINC01624  |
| ENSG00000266283 | 1.847628125 | 0           | 3.217876757  | 0.350224024 | 1           | AC091588.3 |
| ENSG00000177688 | 8.156907756 | 4.340987191 | 0.914202311  | 0.350260563 | 0.475773498 | SUMO4      |
| ENSG00000272103 | 7.211639123 | 3.300895859 | 1.137212477  | 0.350283107 | 0.475779246 | AC026741.1 |
| ENSG00000279693 | 2.094270155 | 0.356539013 | 2.440172452  | 0.350296031 | 1           | AC099521.2 |
| ENSG00000260160 | 35.29061798 | 26.39300555 | 0.422858824  | 0.350367869 | 0.475869497 | AC011468.1 |
| ENSG00000197782 | 5.787019107 | 2.934900236 | 0.990547209  | 0.350409192 | 0.475900744 | ZNF780A    |
| ENSG00000174255 | 2.128261214 | 0.387220594 | 2.460998645  | 0.350426727 | 1           | ZNF80      |
| novel.638       | 83.21465337 | 56.87517146 | 0.55105298   | 0.3505036   | 0.476004079 | -          |
| ENSG00000286132 | 10.98504922 | 17.24237831 | -0.652786873 | 0.350631222 | 0.476152508 | AC022415.2 |
| ENSG00000236941 | 1.845120827 | 0           | 3.21604234   | 0.350636247 | 1           | AC106872.1 |
| ENSG00000270415 | 1.845120827 | 0           | 3.21604234   | 0.350636247 | 1           | DPPA3P3    |
| ENSG00000283648 | 1.845120827 | 0           | 3.21604234   | 0.350636247 | 1           | AC006974.2 |
| ENSG00000230461 | 1.845120827 | 0           | 3.21604234   | 0.350636247 | 1           | PROX1-AS1  |
| ENSG00000229101 | 1.845120827 | 0           | 3.21604234   | 0.350636247 | 1           | ELOCP20    |
| ENSG00000286739 | 1.845120827 | 0           | 3.21604234   | 0.350636247 | 1           | AC007387.2 |
| ENSG00000216813 | 1.845120827 | 0           | 3.21604234   | 0.350636247 | 1           | AL358178.1 |
| ENSG00000224944 | 1.845120827 | 0           | 3.21604234   | 0.350636247 | 1           | CASC6      |
| ENSG00000228115 | 1.845120827 | 0           | 3.21604234   | 0.350636247 | 1           | AL161725.2 |
| ENSG00000270403 | 1.845120827 | 0           | 3.21604234   | 0.350636247 | 1           | AP001554.1 |
| ENSG00000203900 | 1.845120827 | 0           | 3.21604234   | 0.350636247 | 1           | AL121827.1 |
| ENSG00000266969 | 12.66132586 | 7.287784182 | 0.784614944  | 0.350665832 | 0.476166312 | AP002449.1 |
| ENSG00000181741 | 2.430348874 | 0.743759607 | 1.731900034  | 0.350678042 | 0.476166312 | FDX1P1     |
| ENSG00000182347 | 2.098031101 | 0.336469917 | 2.442470243  | 0.350759664 | 1           | PDSS1P1    |
| ENSG00000249014 | 3.634796025 | 6.961926751 | -0.947623757 | 0.350845739 | 0.476369121 | HMGN2P4    |
| ENSG00000181222 | 40.27997153 | 58.0031164  | -0.52810944  | 0.350886663 | 0.47639979  | POLR2A     |
| ENSG00000103423 | 76.50644151 | 118.4590424 | -0.630521359 | 0.3509274   | 0.476425018 | DNAJA3     |
| ENSG00000264964 | 5.443347225 | 10.19071857 | -0.900925065 | 0.350953283 | 0.476425018 | AP001033.1 |
| ENSG00000227212 | 5.353910537 | 11.94157617 | -1.152674931 | 0.350960256 | 0.476425018 | PFN1P6     |
| ENSG00000102316 | 4199.851302 | 4993.638979 | -0.249754219 | 0.350990351 | 0.476440977 | MAGED2     |
| ENSG00000157601 | 1967.582068 | 2626.756327 | -0.416973928 | 0.351068397 | 0.476522022 | MX1        |
| ENSG00000287637 | 0.293240848 | 1.874739808 | -2.518141931 | 0.351075941 | 1           | AP001437.2 |
| ENSG00000259577 | 4.311968057 | 9.537847829 | -1.146404228 | 0.351193185 | 0.4766665   | CERNA1     |



|                 |             |             |              |             |             |              |
|-----------------|-------------|-------------|--------------|-------------|-------------|--------------|
| ENSG00000287663 | 0.615458159 | 2.455634897 | -2.01077451  | 0.351213193 | 0.476668754 | AL122020.2   |
| ENSG00000006468 | 1047.584753 | 741.5401956 | 0.498569803  | 0.35123282  | 0.476670492 | ETV1         |
| ENSG00000254272 | 2.094270155 | 0.336469917 | 2.440163819  | 0.351274712 | 1           | AC087854.2   |
| ENSG00000119514 | 27.78595147 | 44.79041436 | -0.692150269 | 0.351436578 | 0.476922107 | GALNT12      |
| ENSG00000115464 | 1014.063829 | 1204.223317 | -0.247836296 | 0.351463304 | 0.476933464 | USP34        |
| ENSG00000065559 | 473.8416137 | 546.3909185 | -0.206091908 | 0.351501606 | 0.476960528 | MAP2K4       |
| ENSG00000286608 | 6.525620278 | 2.853467977 | 1.194568037  | 0.35154378  | 0.476992843 | AC010201.3   |
| ENSG00000261740 | 1.201939854 | 3.485113743 | -1.540038325 | 0.351618626 | 0.477050871 | BOLA2-SMG1P6 |
| ENSG00000237357 | 11.91645645 | 6.461308046 | 0.88154924   | 0.35162327  | 0.477050871 | BX088651.4   |
| ENSG00000216895 | 21.30170195 | 30.40227472 | -0.515303283 | 0.351679413 | 0.477102126 | AC009403.1   |
| ENSG00000251226 | 0.308355904 | 2.691759334 | -3.053339927 | 0.35175948  | 0.477160918 | AP001999.1   |
| ENSG00000262319 | 0.308355904 | 2.691759334 | -3.053339927 | 0.35175948  | 0.477160918 | AC007952.6   |
| ENSG00000233661 | 2.128261214 | 0.356539013 | 2.461002854  | 0.351843768 | 1           | SPIN4-AS1    |
| ENSG00000108826 | 790.971655  | 923.6711034 | -0.224112917 | 0.351987786 | 0.477445686 | MRPL27       |
| ENSG00000148498 | 557.7082496 | 733.074837  | -0.394444993 | 0.352028276 | 0.47747568  | PARD3        |
| ENSG00000143199 | 5.746688534 | 2.92428775  | 0.985439839  | 0.352203705 | 0.477688685 | ADCY10       |
| novel.406       | 3.699017196 | 1.080229524 | 1.774604889  | 0.35222298  | 0.47768989  | -            |
| ENSG00000196361 | 2.714742909 | 0.693008929 | 1.949273642  | 0.352273723 | 0.477733771 | ELAVL3       |
| ENSG00000125734 | 1075.621512 | 904.1005434 | 0.25097583   | 0.352344381 | 0.477804654 | GPR108       |
| ENSG00000145283 | 3.388153995 | 0.713078025 | 2.242534307  | 0.352379589 | 0.477827458 | SLC10A6      |
| ENSG00000216639 | 0.586481695 | 3.048298346 | -2.371771931 | 0.35266056  | 0.47816262  | AL133406.1   |
| ENSG00000232118 | 7.750268352 | 2.832243005 | 1.449281759  | 0.35268812  | 0.47816262  | BACH1-AS1    |
| ENSG00000279145 | 10.82755915 | 6.512058724 | 0.739396714  | 0.352688649 | 0.47816262  | AC011912.1   |
| ENSG00000271819 | 2.12199297  | 0.356539013 | 2.457186131  | 0.352688951 | 1           | RNU6-94P     |
| ENSG00000159110 | 50.62377761 | 37.37365808 | 0.436548649  | 0.352700375 | 0.47816262  | IFNAR2       |
| ENSG00000122863 | 1725.911788 | 1264.529811 | 0.448574519  | 0.352770922 | 0.478233306 | CHST3        |
| ENSG00000260278 | 2.128261214 | 0.336469917 | 2.46100562   | 0.35278134  | 1           | AC098818.2   |
| ENSG00000254233 | 2.128261214 | 0.336469917 | 2.46100562   | 0.35278134  | 1           | LINC02365    |
| ENSG00000239265 | 2.128261214 | 0.336469917 | 2.46100562   | 0.35278134  | 1           | CLRN1-AS1    |
| ENSG00000229018 | 3.375546236 | 7.225136749 | -1.101263962 | 0.353013357 | 0.478516719 | PMS2P7       |
| ENSG00000287737 | 37.93111053 | 59.40620245 | -0.644092268 | 0.353016818 | 0.478516719 | AC132872.5   |
| ENSG00000105705 | 625.531068  | 714.7025188 | -0.192010814 | 0.353035418 | 0.478516966 | AC004475.1   |
| ENSG00000169495 | 3.575589449 | 1.00940975  | 1.795335378  | 0.353070145 | 0.47853907  | HTRA4        |
| ENSG00000181026 | 1057.926456 | 1269.994399 | -0.263766581 | 0.353143733 | 0.478613841 | AEN          |
| ENSG00000278616 | 10.91323489 | 17.99431026 | -0.717142441 | 0.353187133 | 0.478647692 | BEND3P3      |
| ENSG00000100225 | 2095.103649 | 1779.953774 | 0.235248074  | 0.353257248 | 0.478717742 | FBXO7        |
| ENSG00000171303 | 5.797048297 | 2.171071533 | 1.41940244   | 0.353458911 | 0.478947637 | KCNK3        |
| ENSG00000072042 | 1301.753809 | 1473.966892 | -0.179112022 | 0.353463762 | 0.478947637 | RDH11        |
| ENSG00000274447 | 1.804790254 | 5.503933243 | -1.612749224 | 0.353512402 | 0.478988563 | AC005790.1   |
| ENSG00000227057 | 2.12199297  | 0.336469917 | 2.457186884  | 0.353630011 | 1           | WDR46        |
| novel.1094      | 2.946269883 | 0.693008929 | 2.072903498  | 0.353681349 | 0.479192486 | -            |
| ENSG00000228589 | 162.1842524 | 118.2566004 | 0.454355403  | 0.353726106 | 0.479228135 | SPCS2P4      |
| ENSG00000273474 | 9.843284858 | 3.362259022 | 1.55924714   | 0.353748291 | 0.479231971 | AL157392.4   |
| novel.633       | 19.02981207 | 28.65599343 | -0.585458598 | 0.353765828 | 0.479231971 | -            |
| ENSG00000279319 | 2.699627853 | 0.693008929 | 1.942261618  | 0.353943909 | 0.479448211 | AC105074.1   |
| ENSG00000269815 | 6.640272484 | 3.647978261 | 0.874809519  | 0.354109699 | 0.479647782 | AC010463.3   |
| ENSG00000260955 | 1.816144364 | 4.22887335  | -1.225548007 | 0.354208435 | 0.479750536 | AC100821.2   |
| ENSG00000111707 | 894.3380833 | 772.6232098 | 0.211351864  | 0.354238149 | 0.479750536 | SUDS3        |
| ENSG00000198795 | 132.20133   | 232.6213322 | -0.815476584 | 0.354240956 | 0.479750536 | ZNF521       |
| ENSG00000257818 | 1.804790254 | 0           | 3.186141464  | 0.354358364 | 1           | C1GALT1P1    |
| ENSG00000267535 | 1.804790254 | 0           | 3.186141464  | 0.354358364 | 1           | LINC00868    |

|                 |             |             |              |             |             |            |
|-----------------|-------------|-------------|--------------|-------------|-------------|------------|
| ENSG00000224280 | 1.804790254 | 0           | 3.186141464  | 0.354358364 | 1           | AC005014.1 |
| ENSG00000240015 | 1.804790254 | 0           | 3.186141464  | 0.354358364 | 1           | AC084024.1 |
| ENSG00000226661 | 1.804790254 | 0           | 3.186141464  | 0.354358364 | 1           | AC004973.1 |
| ENSG00000202412 | 1.804790254 | 0           | 3.186141464  | 0.354358364 | 1           | RNY3P13    |
| ENSG00000156920 | 1.804790254 | 0           | 3.186141464  | 0.354358364 | 1           | ADGRG4     |
| ENSG00000287105 | 1.804790254 | 0           | 3.186141464  | 0.354358364 | 1           | AC090577.1 |
| ENSG00000254361 | 1.804790254 | 0           | 3.186141464  | 0.354358364 | 1           | AC046195.2 |
| ENSG00000132010 | 7.838451391 | 3.718798035 | 1.090031383  | 0.354372973 | 0.479893502 | ZNF20      |
| ENSG00000164744 | 3.887706299 | 8.510809128 | -1.128796711 | 0.354383462 | 0.479893502 | SUN3       |
| ENSG00000186854 | 118.7869725 | 71.56264373 | 0.729223655  | 0.354463177 | 0.479976432 | TRABD2A    |
| ENSG00000104756 | 1350.898079 | 1106.045255 | 0.28831234   | 0.354542394 | 0.48005868  | KCTD9      |
| ENSG00000140941 | 1953.26917  | 2211.846772 | -0.179306226 | 0.35457856  | 0.480082628 | MAP1LC3B   |
| ENSG00000286186 | 5.671113253 | 2.598430319 | 1.145896744  | 0.354628057 | 0.480124625 | AC018445.5 |
| ENSG00000182196 | 36.77820552 | 25.53242738 | 0.524286555  | 0.354681833 | 0.480172409 | ARL6IP4    |
| ENSG00000230876 | 2.682005499 | 0.713078025 | 1.909207013  | 0.354742189 | 0.480229096 | LINC00486  |
| ENSG00000137731 | 1.81990531  | 0           | 3.197406419  | 0.35482722  | 1           | FXVD2      |
| ENSG00000260422 | 1.81990531  | 0           | 3.197406419  | 0.35482722  | 1           | Z97205.2   |
| ENSG00000286133 | 1.81990531  | 0           | 3.197406419  | 0.35482722  | 1           | AC093817.2 |
| ENSG00000272855 | 1.81990531  | 0           | 3.197406419  | 0.35482722  | 1           | AC104458.1 |
| ENSG00000231621 | 1.81990531  | 0           | 3.197406419  | 0.35482722  | 1           | AC013264.1 |
| ENSG00000279317 | 1.81990531  | 0           | 3.197406419  | 0.35482722  | 1           | AC006994.2 |
| ENSG00000182574 | 1.81990531  | 0           | 3.197406419  | 0.35482722  | 1           | Z97985.1   |
| ENSG00000287274 | 1.81990531  | 0           | 3.197406419  | 0.35482722  | 1           | AL627232.1 |
| ENSG00000222069 | 1.81990531  | 0           | 3.197406419  | 0.35482722  | 1           | RN7SKP285  |
| ENSG00000237633 | 1.81990531  | 0           | 3.197406419  | 0.35482722  | 1           | AC104623.1 |
| ENSG00000249426 | 1.81990531  | 0           | 3.197406419  | 0.35482722  | 1           | AC093206.1 |
| ENSG00000227537 | 1.81990531  | 0           | 3.197406419  | 0.35482722  | 1           | AL139281.1 |
| ENSG00000259780 | 1.81990531  | 0           | 3.197406419  | 0.35482722  | 1           | AC009065.1 |
| ENSG00000271171 | 1.81990531  | 0           | 3.197406419  | 0.35482722  | 1           | AC008555.5 |
| ENSG00000237737 | 1.466204238 | 4.686913718 | -1.664812966 | 0.35484143  | 0.480338415 | DCTN1-AS1  |
| ENSG00000169252 | 174.2712343 | 115.7994116 | 0.591266055  | 0.354914258 | 0.48041197  | ADRB2      |
| ENSG00000215853 | 0.308355904 | 1.844058227 | -2.497383606 | 0.354923216 | 1           | RPTN       |
| ENSG00000268333 | 0.307102255 | 1.844058227 | -2.497385255 | 0.354993042 | 1           | AL132655.1 |
| ENSG00000269155 | 1.801029308 | 0           | 3.183334298  | 0.354995879 | 1           | AL009178.2 |
| ENSG00000265110 | 1.801029308 | 0           | 3.183334298  | 0.354995879 | 1           | MIR4731    |
| ENSG00000285666 | 1.801029308 | 0           | 3.183334298  | 0.354995879 | 1           | AC006972.1 |
| ENSG00000254675 | 1.801029308 | 0           | 3.183334298  | 0.354995879 | 1           | AP003032.1 |
| ENSG00000213293 | 1.801029308 | 0           | 3.183334298  | 0.354995879 | 1           | AC012618.1 |
| ENSG00000260372 | 1.801029308 | 0           | 3.183334298  | 0.354995879 | 1           | AQP4-AS1   |
| ENSG00000258284 | 1.801029308 | 0           | 3.183334298  | 0.354995879 | 1           | POLR2KP1   |
| ENSG00000263154 | 1.801029308 | 0           | 3.183334298  | 0.354995879 | 1           | AC110285.3 |
| ENSG00000239212 | 1.801029308 | 0           | 3.183334298  | 0.354995879 | 1           | RPL6P7     |
| ENSG00000248537 | 1.801029308 | 0           | 3.183334298  | 0.354995879 | 1           | AC091906.1 |
| ENSG00000096088 | 1.801029308 | 0           | 3.183334298  | 0.354995879 | 1           | PGC        |
| ENSG00000233785 | 1.801029308 | 0           | 3.183334298  | 0.354995879 | 1           | AC131011.1 |
| ENSG00000087086 | 44184.72297 | 56874.12844 | -0.364221252 | 0.355035155 | 0.480547534 | FTL        |
| ENSG00000085982 | 1178.65051  | 1016.660704 | 0.213222332  | 0.355051401 | 0.480547534 | USP40      |
| ENSG00000196993 | 7.848551852 | 3.893559308 | 1.006217713  | 0.355102763 | 0.480592013 | NPIPB9     |
| ENSG00000270765 | 5.454701335 | 2.415496705 | 1.154623137  | 0.355207951 | 0.480709333 | GAS2L2     |
| ENSG00000128645 | 0.616711807 | 2.42610919  | -1.99385601  | 0.355294095 | 0.480800869 | HOXD1      |
| ENSG00000283128 | 7.283453457 | 3.872334337 | 0.900112034  | 0.355333624 | 0.480809818 | AC009403.2 |

|                 |             |             |              |             |             |              |
|-----------------|-------------|-------------|--------------|-------------|-------------|--------------|
| ENSG00000185245 | 27.94663303 | 18.01694789 | 0.630282988  | 0.35533772  | 0.480809818 | GP1BA        |
| ENSG00000267316 | 5.155192243 | 2.51699806  | 1.034793715  | 0.355369229 | 0.480827411 | AC090409.2   |
| ENSG00000233799 | 4.807759415 | 9.030341053 | -0.915244953 | 0.355410513 | 0.480858227 | AC139887.1   |
| ENSG00000151353 | 499.7832005 | 590.5063856 | -0.240823659 | 0.355493026 | 0.480944819 | TMEM18       |
| ENSG00000205927 | 1.814890715 | 0           | 3.193686295  | 0.35566846  | 1           | OLIG2        |
| ENSG00000279707 | 1.814890715 | 0           | 3.193686295  | 0.35566846  | 1           | AC120349.3   |
| ENSG00000277590 | 1.814890715 | 0           | 3.193686295  | 0.35566846  | 1           | MIR7845      |
| ENSG00000207119 | 1.814890715 | 0           | 3.193686295  | 0.35566846  | 1           | RF00012      |
| ENSG00000235880 | 1.814890715 | 0           | 3.193686295  | 0.35566846  | 1           | AL158832.1   |
| ENSG00000177212 | 1.814890715 | 0           | 3.193686295  | 0.35566846  | 1           | OR2T33       |
| ENSG00000199508 | 1.814890715 | 0           | 3.193686295  | 0.35566846  | 1           | RNA5SP110    |
| ENSG00000253817 | 1.814890715 | 0           | 3.193686295  | 0.35566846  | 1           | AC120036.2   |
| ENSG00000286225 | 1.814890715 | 0           | 3.193686295  | 0.35566846  | 1           | AC079163.2   |
| ENSG00000237631 | 1.814890715 | 0           | 3.193686295  | 0.35566846  | 1           | AL161454.1   |
| ENSG00000259353 | 2.722336072 | 0.693008929 | 1.953113525  | 0.355693356 | 0.481189341 | AC090515.4   |
| novel.355       | 18.04045192 | 10.69848213 | 0.752701154  | 0.355710807 | 0.481189341 | -            |
| ENSG00000188958 | 3.368024343 | 6.960642481 | -1.046221852 | 0.355753198 | 0.481221214 | UTS2B        |
| ENSG00000270106 | 0.293240848 | 1.844058227 | -2.497403523 | 0.355768136 | 1           | TSNAX-DISC1  |
| ENSG00000142949 | 2250.161935 | 3421.467395 | -0.60452101  | 0.355771413 | 0.481221214 | PTPRF        |
| ENSG00000069345 | 1245.544166 | 1391.274148 | -0.159657378 | 0.355816919 | 0.481257711 | DNAJA2       |
| ENSG00000259933 | 9.849553102 | 16.18221788 | -0.71164449  | 0.356011612 | 0.481495975 | AC009065.2   |
| ENSG00000234608 | 286.6181346 | 333.0176847 | -0.216537829 | 0.356081436 | 0.481564194 | MAPKAPK5-AS1 |
| ENSG00000197705 | 2.46684723  | 0           | 3.635440994  | 0.356084462 | 1           | KLHL14       |
| ENSG00000287414 | 2.46684723  | 0           | 3.635440994  | 0.356084462 | 1           | AC093787.2   |
| novel.1074      | 2.46684723  | 0           | 3.635440994  | 0.356084462 | 1           | -            |
| ENSG00000253164 | 2.46684723  | 0           | 3.635440994  | 0.356084462 | 1           | AC023403.1   |
| ENSG00000236846 | 2.46684723  | 0           | 3.635440994  | 0.356084462 | 1           | AL359979.2   |
| novel.447       | 2.46684723  | 0           | 3.635440994  | 0.356084462 | 1           | -            |
| ENSG00000236485 | 2.46684723  | 0           | 3.635440994  | 0.356084462 | 1           | LINC01945    |
| ENSG00000226240 | 2.46684723  | 0           | 3.635440994  | 0.356084462 | 1           | LINC00381    |
| ENSG00000256591 | 12.05972911 | 17.68034958 | -0.548379933 | 0.356099122 | 0.481564194 | AP003108.2   |
| ENSG00000164308 | 1083.26651  | 718.3041943 | 0.592694947  | 0.356335688 | 0.481859028 | ERAP2        |
| ENSG00000237331 | 0.308355904 | 1.834601616 | -2.490442588 | 0.35645904  | 1           | XIAP-AS1     |
| ENSG00000232626 | 0.308355904 | 1.834601616 | -2.490442588 | 0.35645904  | 1           | AC099336.1   |
| ENSG00000180861 | 2.082916045 | 0.387220594 | 2.43309026   | 0.356593974 | 1           | LINC01559    |
| ENSG00000286179 | 2.45681804  | 0           | 3.629773202  | 0.356850439 | 1           | AL139351.2   |
| ENSG00000259692 | 2.45681804  | 0           | 3.629773202  | 0.356850439 | 1           | AC104041.1   |
| novel.164       | 2.45681804  | 0           | 3.629773202  | 0.356850439 | 1           | -            |
| ENSG00000253563 | 2.45681804  | 0           | 3.629773202  | 0.356850439 | 1           | NKX2-1-AS1   |
| ENSG00000197177 | 2.45681804  | 0           | 3.629773202  | 0.356850439 | 1           | ADGRA1       |
| ENSG00000229924 | 2.45681804  | 0           | 3.629773202  | 0.356850439 | 1           | FAM90A26     |
| ENSG00000225451 | 2.45681804  | 0           | 3.629773202  | 0.356850439 | 1           | AC092634.2   |
| ENSG00000244219 | 11.47074012 | 6.225183609 | 0.889031988  | 0.356895722 | 0.482571099 | TMEM225B     |
| ENSG00000163293 | 44.1010919  | 62.71796759 | -0.506201081 | 0.356899414 | 0.482571099 | NIPAL1       |
| ENSG00000239908 | 2.080408748 | 0.387220594 | 2.431541355  | 0.356938811 | 1           | RN7SL75P     |
| ENSG00000166793 | 58.99702601 | 43.06497286 | 0.458204815  | 0.356946305 | 0.482609385 | YPEL4        |
| ENSG00000236463 | 0.879722543 | 3.82158366  | -2.111773509 | 0.356970666 | 0.482617207 | LINC00427    |
| ENSG00000088808 | 166.7468373 | 137.6994816 | 0.275121439  | 0.357138702 | 0.48279901  | PPP1R13B     |
| ENSG00000274227 | 7.518741378 | 3.892403433 | 0.944240541  | 0.357142303 | 0.48279901  | AC073575.2   |
| ENSG00000164621 | 0.293240848 | 1.834601616 | -2.490460381 | 0.357309182 | 1           | SMAD5-AS1    |
| ENSG00000170604 | 778.7487516 | 677.8135671 | 0.200168162  | 0.357383139 | 0.483099445 | IRF2BP1      |

|                 |             |             |              |             |             |             |
|-----------------|-------------|-------------|--------------|-------------|-------------|-------------|
| ENSG00000142599 | 1937.755348 | 2341.5406   | -0.272937704 | 0.357485715 | 0.483212963 | RERE        |
| ENSG00000188026 | 577.691696  | 507.000753  | 0.188484455  | 0.357573068 | 0.483303803 | RILPL1      |
| ENSG00000173809 | 11.04808801 | 4.097846288 | 1.419260308  | 0.357590124 | 0.483303803 | AC008736.1  |
| ENSG00000268070 | 1.188078446 | 3.455588036 | -1.540548834 | 0.357882623 | 0.483650695 | AC006539.2  |
| ENSG00000116299 | 16.79846622 | 26.83914916 | -0.674090551 | 0.357884015 | 0.483650695 | KIAA1324    |
| ENSG00000180340 | 676.1850828 | 1087.498827 | -0.685590148 | 0.357961533 | 0.483730292 | FZD2        |
| ENSG00000236992 | 11.5488227  | 16.92597749 | -0.55196407  | 0.357986542 | 0.483738927 | RPL12P12    |
| ENSG00000233680 | 2.082916045 | 0.356539013 | 2.433072055  | 0.358049543 | 1           | HNRNPA1P27  |
| ENSG00000226499 | 2.082916045 | 0.356539013 | 2.433072055  | 0.358049543 | 1           | AL136380.1  |
| ENSG00000156206 | 2.082916045 | 0.356539013 | 2.433072055  | 0.358049543 | 1           | CFAP161     |
| ENSG00000175727 | 713.5577273 | 581.3792826 | 0.296026807  | 0.358132526 | 0.483911024 | MLXIP       |
| ENSG00000119878 | 324.5551421 | 413.1246788 | -0.348293615 | 0.358212383 | 0.483993755 | CRIPT       |
| ENSG00000239247 | 1.509042109 | 3.689272328 | -1.278274524 | 0.358305289 | 0.484094109 | RN7SL589P   |
| ENSG00000251348 | 3.608326859 | 9.149599754 | -1.343394785 | 0.358335804 | 0.484094849 | HSPD1P11    |
| novel.639       | 58.95586906 | 42.41197373 | 0.480319757  | 0.358343102 | 0.484094849 | -           |
| ENSG00000200579 | 2.080408748 | 0.356539013 | 2.43152179   | 0.35839656  | 1           | RF00019     |
| ENSG00000271215 | 2.080408748 | 0.356539013 | 2.43152179   | 0.35839656  | 1           | RPL21P136   |
| ENSG00000239367 | 4.775022005 | 1.161661783 | 2.066107131  | 0.358418176 | 0.484171093 | RN7SL477P   |
| ENSG00000239335 | 1.539272221 | 3.862877727 | -1.342087252 | 0.358622863 | 0.484415148 | LLPH-DT     |
| ENSG00000221823 | 591.9193602 | 688.0666291 | -0.217309796 | 0.358636133 | 0.484415148 | PPP3R1      |
| ENSG00000248554 | 5.491270962 | 2.42610919  | 1.159538609  | 0.35867137  | 0.484437558 | AC114956.2  |
| ENSG00000228322 | 0.586481695 | 3.047014077 | -2.356617184 | 0.358786223 | 0.484567493 | AL162419.1  |
| ENSG00000162642 | 520.3358875 | 439.1562779 | 0.24428655   | 0.358873113 | 0.48465965  | C1orf52     |
| ENSG00000172771 | 2.698374204 | 5.401147618 | -0.994848579 | 0.358974581 | 0.484771484 | EFCAB12     |
| ENSG00000227038 | 0.308355904 | 1.90542139  | -2.539291886 | 0.359065928 | 1           | GTF2IP7     |
| ENSG00000270863 | 0.308355904 | 1.90542139  | -2.539291886 | 0.359065928 | 1           | DDX55P1     |
| ENSG00000287848 | 0.308355904 | 1.90542139  | -2.539291886 | 0.359065928 | 1           | AL355303.2  |
| ENSG00000288054 | 0.586481695 | 2.792104814 | -2.241150805 | 0.359072119 | 0.484878001 | AL360178.2  |
| ENSG00000235748 | 0.307102255 | 1.90542139  | -2.539295064 | 0.359130227 | 1           | SEPT14P12   |
| ENSG00000178449 | 433.0309186 | 520.1468261 | -0.264686131 | 0.359166773 | 0.484980611 | COX14       |
| ENSG00000237513 | 1.215801261 | 3.444975551 | -1.515338447 | 0.35924954  | 0.485067161 | AC007384.1  |
| ENSG00000215912 | 2.080408748 | 0.336469917 | 2.431508925  | 0.359361183 | 1           | TTC34       |
| ENSG00000235897 | 5.716458421 | 9.539132099 | -0.741682967 | 0.359586802 | 0.485497308 | TM4SF19-AS1 |
| ENSG00000165912 | 917.3465652 | 740.9763003 | 0.308415143  | 0.359622157 | 0.485519811 | PAC3IN3     |
| ENSG00000083838 | 118.9483809 | 95.04154165 | 0.323235627  | 0.35965495  | 0.485538855 | ZNF446      |
| ENSG00000118094 | 18.97304152 | 29.40257836 | -0.634974522 | 0.359820141 | 0.485736625 | TREH        |
| ENSG00000272563 | 0.293240848 | 1.90542139  | -2.539330262 | 0.359843907 | 1           | AC016745.2  |
| ENSG00000196417 | 175.6016596 | 150.281775  | 0.22558456   | 0.359864438 | 0.485771183 | ZNF765      |
| ENSG00000198099 | 1.789675198 | 0           | 3.174776192  | 0.359956802 | 1           | ADH4        |
| ENSG00000112164 | 1.789675198 | 0           | 3.174776192  | 0.359956802 | 1           | GLP1R       |
| ENSG00000223656 | 1.789675198 | 0           | 3.174776192  | 0.359956802 | 1           | HMGB3P10    |
| ENSG00000187762 | 1.789675198 | 0           | 3.174776192  | 0.359956802 | 1           | HSPE1P11    |
| novel.246       | 1.789675198 | 0           | 3.174776192  | 0.359956802 | 1           | -           |
| ENSG00000275040 | 1.789675198 | 0           | 3.174776192  | 0.359956802 | 1           | AC009159.1  |
| ENSG00000126251 | 1.789675198 | 0           | 3.174776192  | 0.359956802 | 1           | GPR42       |
| ENSG00000233430 | 1.789675198 | 0           | 3.174776192  | 0.359956802 | 1           | AC239798.1  |
| ENSG00000248115 | 1.789675198 | 0           | 3.174776192  | 0.359956802 | 1           | AC023154.1  |
| ENSG00000263232 | 1.789675198 | 0           | 3.174776192  | 0.359956802 | 1           | ATP5F1AP3   |
| ENSG00000215274 | 1.789675198 | 0           | 3.174776192  | 0.359956802 | 1           | GAGE10      |
| ENSG00000259274 | 1.789675198 | 0           | 3.174776192  | 0.359956802 | 1           | AC107241.1  |
| ENSG00000233708 | 1.7871679   | 0           | 3.172889763  | 0.360385848 | 1           | AL512353.2  |

|                 |             |             |              |             |             |            |
|-----------------|-------------|-------------|--------------|-------------|-------------|------------|
| ENSG00000234504 | 1.7871679   | 0           | 3.172889763  | 0.360385848 | 1           | AL353801.2 |
| ENSG00000235806 | 1.7871679   | 0           | 3.172889763  | 0.360385848 | 1           | AF241728.1 |
| ENSG00000229621 | 1.7871679   | 0           | 3.172889763  | 0.360385848 | 1           | LINC01822  |
| ENSG00000167195 | 1.7871679   | 0           | 3.172889763  | 0.360385848 | 1           | GOLGA6C    |
| ENSG00000201544 | 1.7871679   | 0           | 3.172889763  | 0.360385848 | 1           | SNORA16B   |
| ENSG00000252321 | 1.7871679   | 0           | 3.172889763  | 0.360385848 | 1           | RN7SKP83   |
| ENSG00000271763 | 1.7871679   | 0           | 3.172889763  | 0.360385848 | 1           | AC091544.5 |
| ENSG00000218872 | 1.7871679   | 0           | 3.172889763  | 0.360385848 | 1           | AL445189.1 |
| ENSG00000229093 | 1.7871679   | 0           | 3.172889763  | 0.360385848 | 1           | OR51AB1P   |
| ENSG00000200711 | 1.7871679   | 0           | 3.172889763  | 0.360385848 | 1           | RNA5SP28   |
| ENSG00000280103 | 1.7871679   | 0           | 3.172889763  | 0.360385848 | 1           | AC007792.1 |
| ENSG00000111331 | 1508.612954 | 1800.85508  | -0.255537488 | 0.360401196 | 0.486470463 | OAS3       |
| ENSG00000236991 | 3.902821355 | 8.457618305 | -1.108795543 | 0.360439349 | 0.48648131  | EDRF1-AS1  |
| ENSG00000121361 | 76.41570773 | 34.12864997 | 1.160672337  | 0.360446681 | 0.48648131  | KCNJ8      |
| ENSG00000199719 | 0.907445357 | 2.862924587 | -1.658303714 | 0.360492349 | 0.486505523 | RN7SKP74   |
| ENSG00000227598 | 2.391271949 | 5.370466037 | -1.162478459 | 0.360502072 | 0.486505523 | Z94721.1   |
| ENSG00000092439 | 920.6867513 | 798.4134055 | 0.20568994   | 0.36073928  | 0.486800355 | TRPM7      |
| ENSG00000215014 | 20.10595907 | 12.63818112 | 0.661845221  | 0.360951379 | 0.487061275 | AL645728.1 |
| ENSG00000259592 | 4.596433363 | 1.345879667 | 1.745141379  | 0.360995034 | 0.487093816 | PRELID1P4  |
| ENSG00000138336 | 79.58792088 | 58.85346726 | 0.432437885  | 0.361012991 | 0.487093816 | TET1       |
| ENSG00000205352 | 889.4249006 | 1071.254454 | -0.268573444 | 0.361054687 | 0.487124776 | PRR13      |
| ENSG00000146247 | 1088.827978 | 941.4957978 | 0.209899068  | 0.361095885 | 0.487155063 | PHIP       |
| ENSG00000022267 | 2900.390206 | 1824.543701 | 0.668639472  | 0.361130353 | 0.487167016 | FHL1       |
| ENSG00000204588 | 8.223636224 | 13.35241502 | -0.707229891 | 0.361142247 | 0.487167016 | LINC01123  |
| ENSG00000152495 | 33.7178529  | 51.57359863 | -0.614121637 | 0.36118734  | 0.487202548 | CAMK4      |
| ENSG00000270808 | 2.374903244 | 5.379922647 | -1.171759485 | 0.361236405 | 0.487243435 | AC022400.4 |
| ENSG00000274584 | 5.133737672 | 2.171071533 | 1.246578935  | 0.361404087 | 0.487430387 | AP001282.2 |
| ENSG00000204531 | 4.220024071 | 1.426156051 | 1.561820423  | 0.361412531 | 0.487430387 | POU5F1     |
| ENSG00000141026 | 288.2616739 | 251.786808  | 0.195430668  | 0.361528999 | 0.487562155 | MED9       |
| ENSG00000183891 | 172.4859761 | 138.6668269 | 0.316694272  | 0.361563134 | 0.487567822 | TTC32      |
| ENSG00000225311 | 3.839853833 | 1.060160428 | 1.853692887  | 0.361570734 | 0.487567822 | AL024474.2 |
| ENSG00000060339 | 1183.151551 | 1422.133961 | -0.265604943 | 0.361730804 | 0.48773752  | CCAR1      |
| ENSG00000174007 | 97.03898436 | 72.34456811 | 0.424083421  | 0.361734124 | 0.48773752  | CEP19      |
| ENSG00000163472 | 130.1102948 | 107.2211688 | 0.280178089  | 0.361772757 | 0.487744415 | TMEM79     |
| ENSG00000122778 | 127.334194  | 162.8319741 | -0.353794905 | 0.361776784 | 0.487744415 | KIAA1549   |
| ENSG00000172987 | 1.848881773 | 0           | 3.218874006  | 0.361844822 | 1           | HPSE2      |
| ENSG00000285777 | 1.848881773 | 0           | 3.218874006  | 0.361844822 | 1           | AL139142.2 |
| ENSG00000237412 | 1.848881773 | 0           | 3.218874006  | 0.361844822 | 1           | PRSS56     |
| ENSG00000166828 | 1.848881773 | 0           | 3.218874006  | 0.361844822 | 1           | SCNN1G     |
| ENSG00000211804 | 1.848881773 | 0           | 3.218874006  | 0.361844822 | 1           | TRDV1      |
| ENSG00000206249 | 1.848881773 | 0           | 3.218874006  | 0.361844822 | 1           | AL359555.1 |
| ENSG00000256288 | 1.848881773 | 0           | 3.218874006  | 0.361844822 | 1           | LINC02617  |
| ENSG00000144035 | 1.848881773 | 0           | 3.218874006  | 0.361844822 | 1           | NAT8       |
| ENSG00000235659 | 1.848881773 | 0           | 3.218874006  | 0.361844822 | 1           | AL391987.4 |
| ENSG00000286707 | 19.53333878 | 9.661986819 | 1.007761557  | 0.361944067 | 0.487936788 | AC010896.1 |
| ENSG00000112941 | 751.4215959 | 893.2385545 | -0.249055368 | 0.361957034 | 0.487936788 | TENT4A     |
| ENSG00000138744 | 353.7790487 | 438.5184332 | -0.310510258 | 0.361977792 | 0.487939453 | NAAA       |
| ENSG00000255508 | 62.02613616 | 86.57865787 | -0.480852435 | 0.362018003 | 0.487957054 | AP002990.1 |
| ENSG00000234996 | 4.591347497 | 1.702418679 | 1.404257793  | 0.362028412 | 0.487957054 | AC098934.2 |
| ENSG00000140905 | 149.0379911 | 110.606883  | 0.427989034  | 0.36206676  | 0.487983426 | GCSH       |
| ENSG00000091009 | 425.5635494 | 369.4545506 | 0.203368168  | 0.362099417 | 0.488002125 | RBM27      |

|                 |             |             |              |             |             |            |
|-----------------|-------------|-------------|--------------|-------------|-------------|------------|
| ENSG00000247735 | 8.160668702 | 12.5353955  | -0.61921636  | 0.362118909 | 0.488003079 | AC120114.1 |
| ENSG00000280219 | 11.28574069 | 21.87280916 | -0.958783449 | 0.362226626 | 0.488122924 | AC093908.1 |
| ENSG00000228169 | 0.307102255 | 1.467450118 | -2.165789288 | 0.362389063 | 1           | PPIAP19    |
| ENSG00000084234 | 12790.59152 | 10622.84841 | 0.267943793  | 0.362516302 | 0.488487944 | APLP2      |
| ENSG00000136152 | 574.0271402 | 660.8626746 | -0.202755025 | 0.362590881 | 0.488563099 | COG3       |
| ENSG00000200033 | 0           | 2.0188195   | -3.59940977  | 0.362631337 | 1           | RNU6-403P  |
| ENSG00000238107 | 0           | 2.0188195   | -3.59940977  | 0.362631337 | 1           | AC245100.6 |
| ENSG00000145839 | 1.843867178 | 0           | 3.215192042  | 0.362664051 | 1           | IL9        |
| ENSG00000267079 | 1.843867178 | 0           | 3.215192042  | 0.362664051 | 1           | AP001269.2 |
| ENSG00000268531 | 1.843867178 | 0           | 3.215192042  | 0.362664051 | 1           | AC060814.3 |
| ENSG00000234142 | 1.843867178 | 0           | 3.215192042  | 0.362664051 | 1           | LINC01675  |
| ENSG00000277631 | 1.843867178 | 0           | 3.215192042  | 0.362664051 | 1           | PGM5P3-AS1 |
| ENSG00000279370 | 1.843867178 | 0           | 3.215192042  | 0.362664051 | 1           | AC004777.1 |
| ENSG00000189269 | 7.234347342 | 3.475657132 | 1.044616703  | 0.362678556 | 0.488645522 | DRICH1     |
| ENSG00000120662 | 199.937245  | 168.9504849 | 0.242807467  | 0.362689668 | 0.488645522 | MTRF1      |
| ENSG00000103174 | 377.9153894 | 315.1442214 | 0.261783044  | 0.36272606  | 0.488669213 | NAGPA      |
| novel.669       | 22.72248975 | 34.32659682 | -0.59448668  | 0.362750541 | 0.488676854 | -          |
| ENSG00000124701 | 3.297463658 | 1.00940975  | 1.674996714  | 0.362786906 | 0.488700503 | APOBEC2    |
| ENSG00000114120 | 2022.557771 | 1556.746728 | 0.377806736  | 0.362806966 | 0.488702187 | SLC25A36   |
| ENSG00000272899 | 49.27813781 | 32.25322101 | 0.615179677  | 0.36290834  | 0.488813395 | ATP6V1FNB  |
| ENSG00000105479 | 3.677633896 | 7.285344037 | -0.987176208 | 0.362932419 | 0.488820487 | CCDC114    |
| ENSG00000188760 | 102.7006101 | 85.98398664 | 0.255658376  | 0.362955392 | 0.488826087 | TMEM198    |
| ENSG00000197355 | 718.5299707 | 540.597949  | 0.410959945  | 0.362992937 | 0.488851311 | UAP1L1     |
| ENSG00000264304 | 3.549120283 | 8.653732944 | -1.284985298 | 0.363142795 | 0.489027778 | AC024267.3 |
| ENSG00000230832 | 0.293240848 | 1.467450118 | -2.165815711 | 0.36316292  | 1           | AC241584.1 |
| ENSG00000273196 | 0.293240848 | 1.467450118 | -2.165815711 | 0.36316292  | 1           | AC062037.2 |
| ENSG00000230501 | 0.293240848 | 1.467450118 | -2.165815711 | 0.36316292  | 1           | ANKRD30BP3 |
| ENSG00000235328 | 1.203193503 | 3.342189926 | -1.460917016 | 0.363370954 | 0.48930967  | AC006946.1 |
| ENSG00000274653 | 4.796405305 | 9.121101528 | -0.919671539 | 0.363523461 | 0.489489663 | AC106782.6 |
| ENSG00000170473 | 417.880765  | 478.8803794 | -0.196332865 | 0.363578228 | 0.489538035 | PYM1       |
| ENSG00000177910 | 2.43410982  | 0.672939833 | 1.811380434  | 0.363702804 | 0.489680393 | SPATA31C2  |
| ENSG00000260577 | 2.150969433 | 0.387220594 | 2.474992218  | 0.363822151 | 1           | AC126773.2 |
| ENSG00000254866 | 2.729857965 | 0.723690511 | 1.920249618  | 0.363869777 | 0.489879815 | DEFB109D   |
| ENSG00000280057 | 6.728455523 | 2.742510011 | 1.27674495   | 0.363967547 | 0.489986053 | AL022069.2 |
| ENSG00000280120 | 59.42791202 | 77.52179201 | -0.385813726 | 0.364022855 | 0.49003512  | AC073857.1 |
| ENSG00000264229 | 1.835020366 | 0           | 3.208643884  | 0.364079967 | 1           | RNU4ATAC   |
| ENSG00000225884 | 1.835020366 | 0           | 3.208643884  | 0.364079967 | 1           | AC098872.1 |
| ENSG00000233085 | 1.835020366 | 0           | 3.208643884  | 0.364079967 | 1           | BX322234.2 |
| ENSG00000161905 | 1.835020366 | 0           | 3.208643884  | 0.364079967 | 1           | ALOX15     |
| ENSG00000285907 | 1.835020366 | 0           | 3.208643884  | 0.364079967 | 1           | AL161910.1 |
| ENSG00000286162 | 41.90818224 | 32.14239144 | 0.386084769  | 0.364082939 | 0.490090608 | AL162253.2 |
| ENSG00000243415 | 2.460578986 | 5.971301827 | -1.276795878 | 0.364110965 | 0.490102941 | AC107021.1 |
| ENSG00000279059 | 71.80205181 | 55.73422075 | 0.363364371  | 0.36418529  | 0.49017759  | AC007485.2 |
| ENSG00000232530 | 2.157237677 | 0.356539013 | 2.478815401  | 0.364308023 | 1           | LIF-AS1    |
| ENSG00000112763 | 783.3658695 | 910.5396459 | -0.216917914 | 0.364382255 | 0.490393592 | BTN2A1     |
| ENSG00000140367 | 930.5801933 | 1084.973913 | -0.221650333 | 0.364383522 | 0.490393592 | UBE2Q2     |
| ENSG00000212588 | 4.807759415 | 2.058957692 | 1.201464679  | 0.364459061 | 0.490454697 | SNORA26    |
| ENSG00000213614 | 986.0320025 | 852.9210188 | 0.209242529  | 0.364466681 | 0.490454697 | HEXA       |
| ENSG00000100441 | 957.0749865 | 1122.132192 | -0.229347496 | 0.364490957 | 0.490461962 | KHNYN      |
| ENSG00000224805 | 3.914175465 | 1.803920035 | 1.123321925  | 0.364543699 | 0.490495815 | LINC00853  |
| ENSG00000226900 | 2.75758078  | 0.774441189 | 1.873119671  | 0.364553874 | 0.490495815 | AL451069.1 |

|                 |             |             |              |             |             |            |
|-----------------|-------------|-------------|--------------|-------------|-------------|------------|
| ENSG00000215914 | 6.871799458 | 2.945512721 | 1.234001211  | 0.364608073 | 0.490543335 | MMP23A     |
| ENSG00000220157 | 3.328947419 | 6.309056013 | -0.930445745 | 0.364668456 | 0.49059917  | HNRNPA1P12 |
| ENSG00000227001 | 7.846044555 | 15.88588616 | -1.016527591 | 0.364867449 | 0.490841465 | NBPF2P     |
| ENSG00000253767 | 2.080408748 | 5.023383634 | -1.264440351 | 0.364931854 | 0.490902687 | PCDHGA8    |
| ENSG00000183439 | 80.8664762  | 60.26533359 | 0.421604429  | 0.364965668 | 0.490922756 | TRIM61     |
| ENSG00000247934 | 25.39718682 | 15.9083954  | 0.669743746  | 0.365053998 | 0.491016149 | AC022364.1 |
| ENSG00000143437 | 1121.900641 | 978.8167453 | 0.197161055  | 0.365073942 | 0.491017554 | ARNT       |
| ENSG00000134108 | 1480.52238  | 1665.165138 | -0.169486443 | 0.365101326 | 0.491028966 | ARL8B      |
| ENSG00000260930 | 1.828752122 | 0           | 3.204009373  | 0.365121284 | 1           | LINC01416  |
| ENSG00000280870 | 1.828752122 | 0           | 3.204009373  | 0.365121284 | 1           | AC233296.1 |
| ENSG00000288086 | 1.828752122 | 0           | 3.204009373  | 0.365121284 | 1           | AL157414.4 |
| ENSG00000229815 | 1.828752122 | 0           | 3.204009373  | 0.365121284 | 1           | CCNB1IP1P1 |
| ENSG00000278744 | 1.828752122 | 0           | 3.204009373  | 0.365121284 | 1           | AL449363.1 |
| ENSG00000237410 | 2.460578986 | 7.314869743 | -1.57365676  | 0.365126817 | 0.49103783  | AP001092.1 |
| ENSG00000227825 | 19.55826957 | 27.74962609 | -0.505234913 | 0.36530685  | 0.491254517 | SLC9A7P1   |
| ENSG00000101473 | 368.455565  | 433.4571163 | -0.233844807 | 0.365419768 | 0.491379917 | ACOT8      |
| novel.434       | 92.34234527 | 62.70380626 | 0.56052785   | 0.36545423  | 0.491379917 | -          |
| ENSG00000273828 | 21.59709409 | 14.18577923 | 0.612524564  | 0.365456839 | 0.491379917 | AL133227.1 |
| ENSG00000181433 | 2.34592678  | 0           | 3.565570261  | 0.365600305 | 1           | SAGE1      |
| ENSG00000167355 | 2.34592678  | 0           | 3.565570261  | 0.365600305 | 1           | OR51B5     |
| ENSG00000167941 | 2.34592678  | 0           | 3.565570261  | 0.365600305 | 1           | SOST       |
| ENSG00000180016 | 2.34592678  | 0           | 3.565570261  | 0.365600305 | 1           | OR1E1      |
| ENSG00000279573 | 2.34592678  | 0           | 3.565570261  | 0.365600305 | 1           | AC134407.2 |
| ENSG00000240240 | 2.34592678  | 0           | 3.565570261  | 0.365600305 | 1           | BX664727.3 |
| ENSG00000278492 | 6.301686468 | 3.200550379 | 0.975434779  | 0.365841505 | 0.49187167  | AC006213.5 |
| ENSG00000270149 | 5.000209465 | 1.386017859 | 1.841462581  | 0.365896452 | 0.491912561 | AL591806.3 |
| ENSG00000111596 | 1105.665351 | 958.5671868 | 0.206244747  | 0.365909786 | 0.491912561 | AC092881.1 |
| ENSG00000177156 | 3223.675825 | 3715.340678 | -0.204754963 | 0.365945682 | 0.491935363 | TALDO1     |
| ENSG00000246985 | 35.72114798 | 47.62817995 | -0.417012358 | 0.366005817 | 0.491984764 | SOCS2-AS1  |
| ENSG00000279227 | 17.55726832 | 25.59006613 | -0.53885497  | 0.366020304 | 0.491984764 | AC009303.4 |
| ENSG00000157445 | 33.09953143 | 60.51338914 | -0.86884292  | 0.366055209 | 0.49199946  | CACNA2D3   |
| ENSG00000136918 | 1.200686205 | 3.841652756 | -1.679689426 | 0.36606911  | 0.49199946  | WDR38      |
| ENSG00000100652 | 2.14337627  | 0.356539013 | 2.470338117  | 0.366181126 | 1           | SLC10A1    |
| ENSG00000239482 | 2.14337627  | 0.356539013 | 2.470338117  | 0.366181126 | 1           | AC112487.1 |
| ENSG00000149357 | 1632.875044 | 1885.520814 | -0.207547621 | 0.366200088 | 0.492150035 | LAMTOR1    |
| ENSG00000085719 | 1987.619266 | 1747.567633 | 0.185657033  | 0.366426962 | 0.492429468 | CPNE3      |
| ENSG00000267800 | 3.604565913 | 1.365948763 | 1.372665176  | 0.36648227  | 0.492477231 | AC012254.4 |
| ENSG00000167515 | 629.6030892 | 707.2332608 | -0.167697411 | 0.366500414 | 0.492477231 | TRAPPC2L   |
| ENSG00000080815 | 1116.836396 | 1252.995231 | -0.166106775 | 0.366602973 | 0.492589565 | PSEN1      |
| ENSG00000133488 | 10.14530125 | 4.554602387 | 1.171903976  | 0.366701067 | 0.492674447 | SEC14L4    |
| ENSG00000125458 | 542.0198401 | 448.7033727 | 0.272326604  | 0.366704071 | 0.492674447 | NT5C       |
| ENSG00000232176 | 3.62978143  | 1.060160428 | 1.768987261  | 0.366729779 | 0.49268351  | AL161909.1 |
| ENSG00000138448 | 3563.197281 | 4065.598031 | -0.190279307 | 0.366841369 | 0.492807943 | ITGAV      |
| ENSG00000134744 | 721.3590247 | 615.4597841 | 0.229258274  | 0.366902871 | 0.492845616 | TUT4       |
| ENSG00000100941 | 2319.717245 | 2702.430277 | -0.220257425 | 0.366907352 | 0.492845616 | PNN        |
| ENSG00000135317 | 929.2535602 | 1055.343897 | -0.18334734  | 0.366961446 | 0.492892794 | SNX14      |
| ENSG00000234206 | 2.14337627  | 0.336469917 | 2.470344475  | 0.367063609 | 1           | AL121957.1 |
| ENSG00000169075 | 2.135854377 | 0.356539013 | 2.46574146   | 0.367200662 | 1           | Z99496.1   |
| novel.556       | 2.135854377 | 0.356539013 | 2.46574146   | 0.367200662 | 1           | -          |
| ENSG00000112365 | 231.1371077 | 184.4722545 | 0.32463004   | 0.36731422  | 0.493310098 | ZBTB24     |
| ENSG00000234369 | 1.804790254 | 4.361056287 | -1.266562981 | 0.367315915 | 0.493310098 | TATDN1P1   |

|                 |             |             |              |             |             |             |
|-----------------|-------------|-------------|--------------|-------------|-------------|-------------|
| ENSG00000188693 | 5.524008372 | 2.069570178 | 1.39902882   | 0.367329092 | 0.493310098 | CYP51A1-AS1 |
| ENSG00000235527 | 2.3900183   | 5.166179057 | -1.097298552 | 0.367349644 | 0.493312198 | HIPK1-AS1   |
| ENSG00000110375 | 1.539272221 | 4.025742245 | -1.389389789 | 0.367378961 | 0.493326069 | UPK2        |
| ENSG00000233614 | 4.844329042 | 1.753169357 | 1.45656969   | 0.367451474 | 0.493397941 | DDX11L10    |
| ENSG00000270996 | 2.758834428 | 0.713078025 | 1.945081375  | 0.367540142 | 0.493491495 | AC005034.4  |
| ENSG00000229585 | 2.714742909 | 0.743759607 | 1.888418057  | 0.367595414 | 0.493540202 | RPL21P44    |
| ENSG00000226419 | 9.847045804 | 5.166179057 | 0.943099573  | 0.367668092 | 0.493612272 | SLC16A1-AS1 |
| ENSG00000272768 | 15.95656696 | 8.988918592 | 0.826652353  | 0.367790501 | 0.493751098 | AC004854.2  |
| ENSG00000198814 | 226.1428817 | 293.8445889 | -0.3767633   | 0.367872119 | 0.493835152 | GK          |
| ENSG00000142089 | 20133.84773 | 17280.07438 | 0.220499769  | 0.367967615 | 0.493937824 | IFITM3      |
| ENSG00000095739 | 198.2613091 | 286.0704885 | -0.529124876 | 0.368074378 | 0.494055611 | BAMBI       |
| ENSG00000251972 | 2.932408476 | 0.387220594 | 2.926116105  | 0.368097607 | 0.494061266 | RNU6-123P   |
| ENSG00000230585 | 0.307102255 | 1.436768536 | -2.142126874 | 0.368231394 | 1           | PHBP12      |
| ENSG00000213996 | 6.435214676 | 13.55169332 | -1.071218598 | 0.368273919 | 0.494272378 | TM6SF2      |
| ENSG00000206384 | 8.79876381  | 17.08640186 | -0.953985848 | 0.368365261 | 0.494369433 | COL6A6      |
| ENSG00000266733 | 8.371994754 | 3.761376372 | 1.13986531   | 0.368430871 | 0.494431945 | TBC1D29P    |
| ENSG00000164081 | 783.7025329 | 884.0186613 | -0.173713902 | 0.368518232 | 0.494500321 | TEX264      |
| ENSG00000166153 | 9.540228284 | 18.7806482  | -0.979078608 | 0.368529939 | 0.494500321 | DEPDC4      |
| ENSG00000279762 | 6.038675732 | 3.230076085 | 0.903224176  | 0.368538921 | 0.494500321 | AC005899.8  |
| ENSG00000143033 | 460.4958508 | 400.3482314 | 0.202594328  | 0.368634856 | 0.494603501 | MTF2        |
| ENSG00000271670 | 4.459072938 | 1.069617038 | 2.058067133  | 0.368766428 | 0.494754483 | AC010998.2  |
| ENSG00000266967 | 28.74451204 | 41.4302103  | -0.527454481 | 0.36882647  | 0.494801839 | AARSD1      |
| ENSG00000196981 | 226.9065837 | 176.0986842 | 0.364250709  | 0.368839814 | 0.494801839 | WDR5B       |
| ENSG00000164180 | 386.6993667 | 316.6482477 | 0.288542123  | 0.368881527 | 0.494832246 | TMEM161B    |
| ENSG00000286509 | 11.73876545 | 5.820334064 | 0.999336302  | 0.368944756 | 0.494891513 | AC026408.1  |
| ENSG00000165792 | 633.561514  | 536.4554947 | 0.240106621  | 0.36899218  | 0.494929573 | METTLL17    |
| ENSG00000215482 | 0.293240848 | 1.436768536 | -2.142127337 | 0.369027002 | 1           | CALM2P3     |
| ENSG00000232194 | 0.293240848 | 1.436768536 | -2.142127337 | 0.369027002 | 1           | Z99943.1    |
| ENSG00000259922 | 0.293240848 | 1.436768536 | -2.142127337 | 0.369027002 | 1           | AC023825.1  |
| ENSG00000258581 | 3.605819561 | 1.406086955 | 1.347644213  | 0.369075234 | 0.495015417 | AL157871.3  |
| ENSG00000029559 | 6.173172855 | 1.702418679 | 1.845845428  | 0.369146904 | 0.495085986 | IBSP        |
| ENSG00000273416 | 3.931797819 | 1.456837632 | 1.439408821  | 0.369234354 | 0.495177708 | AL732292.2  |
| ENSG00000228283 | 11.18000657 | 16.28487511 | -0.53855678  | 0.369259694 | 0.495186131 | KATNBL1P6   |
| ENSG00000176435 | 293.9687713 | 151.5706707 | 0.955032903  | 0.369330939 | 0.495249109 | CLEC14A     |
| ENSG00000155366 | 6613.905174 | 5781.734339 | 0.19398933   | 0.36934478  | 0.495249109 | RHOC        |
| ENSG00000248240 | 3.016830569 | 1.060160428 | 1.50062931   | 0.369383526 | 0.495275501 | AC114956.1  |
| ENSG00000205559 | 39.40727268 | 54.57731086 | -0.471586644 | 0.369568714 | 0.495485746 | CHKB-DT     |
| ENSG00000161914 | 124.7817854 | 100.7399201 | 0.3097995    | 0.369578472 | 0.495485746 | ZNF653      |
| ENSG00000140153 | 410.5454568 | 484.9804434 | -0.24046932  | 0.369645489 | 0.495544778 | WDR20       |
| ENSG00000245213 | 35.80836211 | 23.51959687 | 0.603693262  | 0.369661328 | 0.495544778 | AC105285.1  |
| ENSG00000125901 | 715.137956  | 854.4222585 | -0.256933845 | 0.369679723 | 0.495544778 | MRPS26      |
| ENSG00000152137 | 191.520103  | 280.9255813 | -0.553176749 | 0.369869711 | 0.49576164  | HSPB8       |
| ENSG00000267673 | 2.694613258 | 0.743759607 | 1.879094749  | 0.369879667 | 0.49576164  | FDX2        |
| ENSG00000185561 | 4.222531369 | 1.702418679 | 1.282894333  | 0.370026467 | 0.495932816 | TLCD2       |
| ENSG00000180964 | 1270.588277 | 1462.614396 | -0.203068023 | 0.37016073  | 0.496087173 | TCEAL8      |
| ENSG00000256671 | 1.218308559 | 3.210006989 | -1.403051302 | 0.370193702 | 0.49610577  | LIMS4       |
| ENSG00000177238 | 2.729857965 | 0.743759607 | 1.895103968  | 0.370235911 | 0.496136745 | TRIM72      |
| ENSG00000268357 | 18.55135833 | 10.98638473 | 0.762911415  | 0.370330312 | 0.496237652 | VN1R81P     |
| ENSG00000174943 | 500.1672457 | 420.6156285 | 0.25072165   | 0.370388036 | 0.496272818 | KCTD13      |
| ENSG00000173821 | 4135.822369 | 3598.542375 | 0.20075888   | 0.370394758 | 0.496272818 | AC124319.1  |
| ENSG00000229955 | 3.006730108 | 1.060160428 | 1.496644672  | 0.37047491  | 0.496354612 | Z98749.1    |



|                 |             |             |              |             |             |             |
|-----------------|-------------|-------------|--------------|-------------|-------------|-------------|
| ENSG00000188517 | 26.17235762 | 17.91403388 | 0.551574025  | 0.370519878 | 0.496389262 | COL25A1     |
| ENSG00000263033 | 3.32769377  | 1.467450118 | 1.197096807  | 0.370584144 | 0.49644976  | AC007220.1  |
| ENSG00000283980 | 0.925067711 | 3.149799701 | -1.780572905 | 0.370610989 | 0.496460123 | GNG14       |
| ENSG00000105929 | 2.744973021 | 6.725673919 | -1.288399299 | 0.370703748 | 0.496558779 | ATP6V0A4    |
| ENSG00000135801 | 400.7249511 | 461.7889686 | -0.204704273 | 0.370815281 | 0.49668257  | TAF5L       |
| ENSG00000105939 | 1052.905334 | 1262.348055 | -0.261893072 | 0.37086712  | 0.496726396 | ZC3HAV1     |
| ENSG00000243422 | 20.35385475 | 11.37501798 | 0.830336786  | 0.370905619 | 0.496752353 | RPL23AP49   |
| ENSG00000269919 | 1.759445085 | 5.542787165 | -1.642830107 | 0.370953891 | 0.496791394 | AL022067.1  |
| ENSG00000218510 | 46.0816075  | 33.83676617 | 0.441841765  | 0.371120695 | 0.496989164 | LINC00339   |
| ENSG00000114331 | 953.1883597 | 1077.791599 | -0.17726613  | 0.371214703 | 0.497074342 | ACAP2       |
| ENSG00000215808 | 111.3193452 | 188.5638082 | -0.760468233 | 0.371222565 | 0.497074342 | LINC01139   |
| ENSG00000207697 | 5.406848869 | 1.936102971 | 1.510096334  | 0.371259727 | 0.497098483 | MIR573      |
| ENSG00000234171 | 146.7071794 | 171.8438343 | -0.228015819 | 0.371353508 | 0.497198427 | RNASEH1-AS1 |
| ENSG00000224613 | 1.54052587  | 5.434269345 | -1.828856226 | 0.371494814 | 0.497361989 | AC095032.1  |
| ENSG00000196653 | 5.437078981 | 2.873537073 | 0.921078487  | 0.371664131 | 0.497563033 | ZNF502      |
| ENSG00000126368 | 209.8297069 | 284.491554  | -0.438245533 | 0.371800672 | 0.497720181 | NR1D1       |
| ENSG00000269956 | 7.240615586 | 3.943154111 | 0.876690488  | 0.372016291 | 0.497983166 | MKNK1-AS1   |
| ENSG00000266821 | 0.293240848 | 1.742556871 | -2.426547634 | 0.372065662 | 1           | AC018521.7  |
| ENSG00000199890 | 0.293240848 | 1.742556871 | -2.426547634 | 0.372065662 | 1           | RF00019     |
| ENSG00000160973 | 1.801029308 | 4.505135979 | -1.327564119 | 0.372082384 | 0.498045977 | FOXH1       |
| ENSG00000250751 | 0.308355904 | 1.41669944  | -2.12603664  | 0.37213981  | 1           | AC015795.1  |
| ENSG00000249077 | 0.307102255 | 1.41669944  | -2.12603516  | 0.372212709 | 1           | AL158068.1  |
| ENSG00000287903 | 0.307102255 | 1.41669944  | -2.12603516  | 0.372212709 | 1           | AL359852.2  |
| ENSG00000267681 | 4.573725143 | 1.90542139  | 1.291006127  | 0.372303152 | 0.49831581  | AC135721.1  |
| ENSG00000136371 | 22.81959087 | 15.52104641 | 0.557022506  | 0.372329265 | 0.49832509  | MTHFS       |
| ENSG00000279373 | 0           | 1.936102971 | -3.528501137 | 0.37244816  | 1           | AC027228.3  |
| ENSG00000287856 | 0           | 1.936102971 | -3.528501137 | 0.37244816  | 1           | AL445524.2  |
| ENSG00000250302 | 0           | 1.936102971 | -3.528501137 | 0.37244816  | 1           | LINC01618   |
| ENSG00000253968 | 0           | 1.936102971 | -3.528501137 | 0.37244816  | 1           | AC016573.1  |
| ENSG00000197919 | 0           | 1.936102971 | -3.528501137 | 0.37244816  | 1           | IFNA1       |
| ENSG00000136834 | 0           | 1.936102971 | -3.528501137 | 0.37244816  | 1           | OR1J1       |
| ENSG00000271412 | 0           | 1.936102971 | -3.528501137 | 0.37244816  | 1           | PRR13P3     |
| ENSG00000287560 | 0           | 1.936102971 | -3.528501137 | 0.37244816  | 1           | AL731533.3  |
| ENSG00000278496 | 0           | 1.936102971 | -3.528501137 | 0.37244816  | 1           | AL158062.1  |
| ENSG00000223361 | 8.460177794 | 4.177994278 | 1.038549903  | 0.372458769 | 0.498472738 | FTH1P10     |
| ENSG00000175595 | 202.8930021 | 236.4135185 | -0.220701798 | 0.372498911 | 0.498500783 | ERCC4       |
| ENSG00000151092 | 448.7583393 | 524.2848575 | -0.224879957 | 0.372634446 | 0.498656479 | NGLY1       |
| ENSG00000253112 | 0.879722543 | 3.749479616 | -2.075455779 | 0.372716507 | 0.498740604 | AC102945.1  |
| ENSG00000268218 | 32.39818407 | 45.00120423 | -0.470289538 | 0.372737804 | 0.498743415 | AC137932.3  |
| ENSG00000261527 | 0.293240848 | 1.41669944  | -2.126018743 | 0.373022818 | 1           | AC026464.5  |
| ENSG00000134899 | 70.89363754 | 91.81959073 | -0.372348594 | 0.3730431   | 0.499126212 | ERCC5       |
| ENSG00000265478 | 7.550225139 | 4.33153058  | 0.805894184  | 0.373155604 | 0.49925103  | AC107982.3  |
| ENSG00000164610 | 219.5516722 | 255.9709669 | -0.22159044  | 0.373211776 | 0.499300471 | RP9         |
| ENSG00000207352 | 0.308355904 | 1.813376645 | -2.476525846 | 0.373244482 | 1           | RNU6-540P   |
| ENSG00000239617 | 0.308355904 | 1.813376645 | -2.476525846 | 0.373244482 | 1           | AC073610.1  |
| ENSG00000123144 | 3327.797041 | 3748.34199  | -0.171670522 | 0.373367394 | 0.499469534 | TRIR        |
| ENSG00000118363 | 1561.447764 | 1391.138078 | 0.166487124  | 0.373407896 | 0.499469534 | SPCS2       |
| ENSG00000127334 | 435.1733256 | 534.8784862 | -0.297834459 | 0.373420544 | 0.499469534 | DYRK2       |
| ENSG00000272556 | 87.20624285 | 60.1861659  | 0.534984851  | 0.373429745 | 0.499469534 | GTF2IP13    |
| novel.413       | 69.49856346 | 113.7238997 | -0.7099544   | 0.373434267 | 0.499469534 | -           |
| ENSG00000261360 | 16.8123989  | 10.02900992 | 0.743390141  | 0.373513997 | 0.499550456 | AC010491.1  |

|                 |             |             |              |             |             |            |
|-----------------|-------------|-------------|--------------|-------------|-------------|------------|
| ENSG00000259804 | 5.705104311 | 2.833398881 | 1.005066367  | 0.373736933 | 0.499822888 | AC027682.1 |
| ENSG00000273199 | 5.380379703 | 2.598430319 | 1.070897063  | 0.373763244 | 0.499832347 | AP000692.2 |
| ENSG00000133398 | 822.071696  | 688.0168372 | 0.256376582  | 0.373839066 | 0.499882846 | MED10      |
| ENSG00000224531 | 495.9442005 | 571.7070338 | -0.205538425 | 0.373839487 | 0.499882846 | SMIM13     |
| ENSG00000286106 | 1.524157165 | 4.167381792 | -1.442268042 | 0.373959152 | 0.500017124 | AC253572.1 |
| ENSG00000005810 | 1092.179844 | 897.4989603 | 0.283116963  | 0.374018161 | 0.500065632 | MYCBP2     |
| ENSG00000113721 | 3148.036669 | 4167.369069 | -0.404747299 | 0.374033926 | 0.500065632 | PDGFRB     |
| ENSG00000199107 | 0.293240848 | 1.813376645 | -2.476531959 | 0.37406988  | 1           | MIR409     |
| ENSG00000134072 | 112.3236508 | 133.9051591 | -0.255069377 | 0.374132936 | 0.500172266 | CAMK1      |
| ENSG00000220867 | 0.586481695 | 2.191140629 | -1.877905975 | 0.374195161 | 0.500229714 | HSPE1P26   |
| ENSG00000138081 | 414.9122576 | 488.202544  | -0.23427666  | 0.374230796 | 0.500237707 | FBXO11     |
| ENSG00000274444 | 5.163967785 | 2.038888596 | 1.316334369  | 0.374239649 | 0.500237707 | AC078909.2 |
| ENSG00000199940 | 1.774560141 | 0           | 3.163220146  | 0.374403809 | 1           | RN7SKP75   |
| ENSG00000235772 | 1.774560141 | 0           | 3.163220146  | 0.374403809 | 1           | AP001625.2 |
| ENSG00000235118 | 1.774560141 | 0           | 3.163220146  | 0.374403809 | 1           | FAM237A    |
| ENSG00000275836 | 1.774560141 | 0           | 3.163220146  | 0.374403809 | 1           | MIR6068    |
| ENSG00000224933 | 1.774560141 | 0           | 3.163220146  | 0.374403809 | 1           | LINC01034  |
| ENSG00000273365 | 1.774560141 | 0           | 3.163220146  | 0.374403809 | 1           | AL451074.5 |
| ENSG00000249131 | 1.774560141 | 0           | 3.163220146  | 0.374403809 | 1           | PSD2-AS1   |
| ENSG00000251767 | 1.774560141 | 0           | 3.163220146  | 0.374403809 | 1           | RNU7-8P    |
| ENSG00000253148 | 1.774560141 | 0           | 3.163220146  | 0.374403809 | 1           | RGS21      |
| ENSG00000237286 | 1.774560141 | 0           | 3.163220146  | 0.374403809 | 1           | AC004906.1 |
| ENSG00000227914 | 1.774560141 | 0           | 3.163220146  | 0.374403809 | 1           | AL136979.1 |
| ENSG00000263821 | 1.774560141 | 0           | 3.163220146  | 0.374403809 | 1           | AP005121.2 |
| ENSG00000234040 | 0.307102255 | 1.722487775 | -2.412072215 | 0.374604736 | 1           | RPL10P12   |
| ENSG00000256056 | 0.307102255 | 1.722487775 | -2.412072215 | 0.374604736 | 1           | AC087257.2 |
| ENSG00000274294 | 1.773306493 | 0           | 3.162266528  | 0.374624876 | 1           | AC015660.3 |
| novel.28        | 1.773306493 | 0           | 3.162266528  | 0.374624876 | 1           | -          |
| ENSG00000224204 | 1.773306493 | 0           | 3.162266528  | 0.374624876 | 1           | PHEX-AS1   |
| ENSG00000226330 | 1.773306493 | 0           | 3.162266528  | 0.374624876 | 1           | AL606489.1 |
| ENSG00000282051 | 1.773306493 | 0           | 3.162266528  | 0.374624876 | 1           | AC010507.1 |
| ENSG00000237307 | 1.773306493 | 0           | 3.162266528  | 0.374624876 | 1           | SRRM1P3    |
| ENSG00000286457 | 1.773306493 | 0           | 3.162266528  | 0.374624876 | 1           | AC009560.2 |
| ENSG00000285548 | 1.773306493 | 0           | 3.162266528  | 0.374624876 | 1           | AC068725.1 |
| ENSG00000213744 | 1.773306493 | 0           | 3.162266528  | 0.374624876 | 1           | RPS10P14   |
| ENSG00000254787 | 1.773306493 | 0           | 3.162266528  | 0.374624876 | 1           | AP001825.1 |
| ENSG00000263904 | 1.773306493 | 0           | 3.162266528  | 0.374624876 | 1           | AC015563.1 |
| ENSG00000271389 | 1.773306493 | 0           | 3.162266528  | 0.374624876 | 1           | OSBPL9P1   |
| ENSG00000262151 | 1.773306493 | 0           | 3.162266528  | 0.374624876 | 1           | AC133065.1 |
| ENSG00000279474 | 1.773306493 | 0           | 3.162266528  | 0.374624876 | 1           | AC125437.2 |
| ENSG00000279130 | 2.446717578 | 0.672939833 | 1.819657595  | 0.374718839 | 0.500852462 | AC091925.1 |
| ENSG00000144426 | 186.7588158 | 241.3026983 | -0.369503679 | 0.374781727 | 0.500910749 | NBEAL1     |
| novel.1098      | 4.859444098 | 1.548882377 | 1.676507368  | 0.374849258 | 0.500975235 | -          |
| ENSG00000136235 | 4062.039162 | 2739.979003 | 0.568106123  | 0.375032841 | 0.501194807 | GPNMB      |
| ENSG00000257058 | 9.407953725 | 5.553399651 | 0.774494595  | 0.375067394 | 0.501215202 | AP001363.2 |
| ENSG00000260475 | 6.909551463 | 2.793260689 | 1.298796273  | 0.375188557 | 0.501351329 | AL353719.1 |
| ENSG00000243607 | 2.067800989 | 0.387220594 | 2.423402521  | 0.375271969 | 1           | RPL35AP26  |
| ENSG00000157110 | 1251.905832 | 1577.015239 | -0.332922176 | 0.375349076 | 0.50154003  | RBPMS      |
| ENSG00000074755 | 1179.350532 | 1029.014553 | 0.196868464  | 0.375406366 | 0.501590785 | ZZEF1      |
| ENSG00000255348 | 0.293240848 | 1.722487775 | -2.412039541 | 0.375447415 | 1           | AP001775.2 |
| ENSG00000266965 | 0.293240848 | 1.722487775 | -2.412039541 | 0.375447415 | 1           | AC090220.1 |

|                 |             |             |              |             |             |            |
|-----------------|-------------|-------------|--------------|-------------|-------------|------------|
| ENSG00000272779 | 6.412577727 | 11.31352643 | -0.825102981 | 0.375520235 | 0.501717126 | AC245060.4 |
| ENSG00000258896 | 6.427621512 | 2.618499415 | 1.308343035  | 0.375552651 | 0.501734634 | SCOCP1     |
| ENSG00000157778 | 549.4781487 | 633.907362  | -0.206288089 | 0.375888276 | 0.502142089 | PSMG3      |
| novel.934       | 1122.748714 | 4539.047871 | -2.015365312 | 0.375896289 | 0.502142089 | -          |
| ENSG00000280927 | 44.93385962 | 57.18365673 | -0.346187347 | 0.375925455 | 0.502155231 | CTBP1-AS   |
| ENSG00000104450 | 48.20904234 | 68.59218162 | -0.511347818 | 0.37597925  | 0.502184423 | SPAG1      |
| ENSG00000277157 | 0.61420451  | 2.160459047 | -1.822096604 | 0.375997902 | 0.502184423 | HIST1H4D   |
| ENSG00000255495 | 15.81419194 | 9.326672778 | 0.74923178   | 0.376005296 | 0.502184423 | AC145124.1 |
| ENSG00000152433 | 53.42949559 | 41.22348317 | 0.373327563  | 0.37603212  | 0.502194434 | ZNF547     |
| ENSG00000204936 | 21.5697982  | 6.553481185 | 1.714732476  | 0.376082194 | 0.502235492 | CD177      |
| ENSG00000260615 | 3.951998741 | 1.487519214 | 1.426247148  | 0.376115519 | 0.502254179 | RPL23AP97  |
| ENSG00000102554 | 228.0045673 | 431.4029351 | -0.920267542 | 0.376220697 | 0.50236881  | KLF5       |
| ENSG00000110675 | 13.21410123 | 29.35473455 | -1.150620222 | 0.376446611 | 0.50264464  | ELMOD1     |
| ENSG00000244411 | 2.067800989 | 0.356539013 | 2.423379689  | 0.376663025 | 1           | KRTAP5-7   |
| ENSG00000242882 | 2.067800989 | 0.356539013 | 2.423379689  | 0.376663025 | 1           | RPL5P11    |
| ENSG00000285799 | 2.067800989 | 0.356539013 | 2.423379689  | 0.376663025 | 1           | AL645929.3 |
| ENSG00000264739 | 2.067800989 | 0.356539013 | 2.423379689  | 0.376663025 | 1           | AC093484.2 |
| ENSG00000085274 | 301.4527112 | 262.3697559 | 0.200167339  | 0.376788003 | 0.503074624 | MYNN       |
| ENSG00000142513 | 5.369025593 | 2.160459047 | 1.317183358  | 0.376809118 | 0.503076963 | ACP4       |
| ENSG00000233144 | 2.06654734  | 0.356539013 | 2.422593172  | 0.376840335 | 1           | AL512656.1 |
| ENSG00000230068 | 1.21705491  | 2.904218654 | -1.253179383 | 0.376842952 | 0.503093921 | CDC42-IT1  |
| ENSG00000143498 | 82.25982592 | 100.4877077 | -0.290689032 | 0.376860548 | 0.503093921 | TAF1A      |
| ENSG00000228779 | 0.894837599 | 2.51699806  | -1.48216375  | 0.376936017 | 0.503168816 | Z69666.1   |
| ENSG00000278875 | 6.891929109 | 13.81618759 | -0.996378098 | 0.377142596 | 0.503404775 | AC025809.2 |
| ENSG00000288007 | 5.506386018 | 2.598430319 | 1.09749076   | 0.377153629 | 0.503404775 | AC092803.5 |
| ENSG00000121390 | 706.7313722 | 821.0769793 | -0.216509738 | 0.377176518 | 0.503404775 | PSPC1      |
| ENSG00000230613 | 5.381633352 | 2.169915658 | 1.314961258  | 0.377190339 | 0.503404775 | HM13-AS1   |
| ENSG00000280327 | 6.099135957 | 9.96764676  | -0.714520447 | 0.37720966  | 0.503404775 | Z97633.1   |
| ENSG00000286811 | 9.387752802 | 5.4318292   | 0.793453037  | 0.377256359 | 0.503441237 | AL353138.1 |
| ENSG00000285658 | 1.200686205 | 3.159256312 | -1.398157147 | 0.377315494 | 0.503494291 | AC127035.1 |
| ENSG00000136940 | 414.0617524 | 480.053972  | -0.213228052 | 0.377400036 | 0.503581241 | PDCL       |
| ENSG00000006715 | 1016.239072 | 888.6388045 | 0.193616566  | 0.377634817 | 0.503868641 | VPS41      |
| ENSG00000270987 | 2.06654734  | 0.336469917 | 2.422577749  | 0.37776149  | 1           | AL133338.2 |
| ENSG00000227154 | 0.293240848 | 2.495773089 | -2.93967276  | 0.377771881 | 0.504025638 | AL022721.1 |
| ENSG00000129292 | 1112.456561 | 972.9939832 | 0.193123193  | 0.377825898 | 0.504063739 | PHF20L1    |
| ENSG00000253327 | 8.217367981 | 3.741307276 | 1.11626243   | 0.377839241 | 0.504063739 | RAD21-AS1  |
| ENSG00000268628 | 3.991004395 | 1.396630344 | 1.499713995  | 0.377859528 | 0.504064921 | AL121761.1 |
| ENSG00000269386 | 85.30180073 | 70.27499793 | 0.282481106  | 0.377953124 | 0.504163891 | RAB11B-AS1 |
| ENSG00000124333 | 903.8992513 | 769.0279213 | 0.232881263  | 0.378036039 | 0.504248606 | VAMP7      |
| ENSG00000234810 | 29.52756074 | 16.95922761 | 0.794649837  | 0.378204066 | 0.504446832 | AL603840.1 |
| ENSG00000106615 | 2096.415306 | 1823.675847 | 0.20095838   | 0.378288019 | 0.504532907 | RHEB       |
| ENSG00000092068 | 101.8492504 | 63.25928524 | 0.685824039  | 0.378442152 | 0.504712569 | SLC7A8     |
| ENSG00000240204 | 2.416487466 | 0.672939833 | 1.804376434  | 0.378543286 | 0.504821534 | SMKR1      |
| ENSG00000163684 | 384.9438526 | 328.2996227 | 0.229127825  | 0.378594248 | 0.504849994 | RPP14      |
| novel.551       | 4.306953462 | 1.386017859 | 1.618598664  | 0.378603491 | 0.504849994 | -          |
| ENSG00000248489 | 21.82013026 | 14.26978003 | 0.603024354  | 0.378639836 | 0.504872547 | LINC02062  |
| ENSG00000081181 | 31.40925119 | 18.74855396 | 0.751338432  | 0.37880093  | 0.505061427 | ARG2       |
| ENSG00000214376 | 6.112997364 | 3.210006989 | 0.922831427  | 0.379197171 | 0.505563797 | VSTM5      |
| ENSG00000063761 | 157.2157127 | 126.3744908 | 0.313487974  | 0.379256844 | 0.50561741  | ADCK1      |
| ENSG00000198736 | 465.4477371 | 399.2314725 | 0.220685556  | 0.37928747  | 0.505632293 | MSRB1      |
| ENSG00000153162 | 523.1996606 | 960.8304859 | -0.876995731 | 0.379451355 | 0.505805897 | BMP6       |

|                 |             |             |              |             |             |            |
|-----------------|-------------|-------------|--------------|-------------|-------------|------------|
| ENSG00000266392 | 3.016830569 | 6.287831042 | -1.065171526 | 0.379456631 | 0.505805897 | MIR4740    |
| ENSG00000215529 | 6.155835235 | 2.099095884 | 1.542124402  | 0.379582207 | 0.505947328 | EFCAB8     |
| ENSG00000112299 | 73.2218707  | 43.77406968 | 0.745601235  | 0.379651334 | 0.505989219 | VNN1       |
| ENSG00000127184 | 3009.035076 | 3595.465099 | -0.256887458 | 0.379652586 | 0.505989219 | COX7C      |
| ENSG00000224086 | 132.3912884 | 108.2901436 | 0.289012211  | 0.379776456 | 0.506128346 | AC245452.1 |
| ENSG00000221869 | 3180.664428 | 2532.880034 | 0.328481824  | 0.379843554 | 0.506191803 | CEBPD      |
| ENSG00000229981 | 2.12199297  | 5.207473124 | -1.288047904 | 0.379925473 | 0.506275002 | LINC01435  |
| ENSG00000123700 | 87.68193238 | 131.3360445 | -0.584093861 | 0.380157036 | 0.506557593 | KCNJ2      |
| ENSG00000257704 | 408.2862724 | 499.8976535 | -0.291869585 | 0.380230222 | 0.50662913  | INAFM1     |
| ENSG00000288012 | 6.044943976 | 2.50754145  | 1.269443709  | 0.380310726 | 0.506710409 | AP003307.1 |
| ENSG00000270332 | 1.50778846  | 3.627909165 | -1.26109052  | 0.380470113 | 0.506874048 | SMC2-AS1   |
| ENSG00000218739 | 710.1159074 | 816.6022681 | -0.201725455 | 0.380478933 | 0.506874048 | CEBPZOS    |
| ENSG00000228847 | 3.619680969 | 6.602947593 | -0.857489946 | 0.380492074 | 0.506874048 | ATP5MC2P4  |
| ENSG00000277678 | 2.66939774  | 0.723690511 | 1.891723195  | 0.380614874 | 0.50701164  | RF00003    |
| ENSG00000138085 | 1689.633201 | 1496.682115 | 0.174883919  | 0.38103658  | 0.507511432 | ATRAID     |
| ENSG00000225447 | 3.617173671 | 1.386017859 | 1.364996944  | 0.381041957 | 0.507511432 | RPS15AP10  |
| ENSG00000147324 | 39.41640423 | 52.13228845 | -0.407323008 | 0.38104867  | 0.507511432 | MFHAS1     |
| ENSG00000163975 | 115.5378313 | 157.3602635 | -0.445733874 | 0.381244483 | 0.507698281 | MELTF      |
| ENSG00000234825 | 0.586481695 | 2.140389951 | -1.850305304 | 0.381247583 | 0.507698281 | XRCC6P2    |
| ENSG00000225037 | 0.586481695 | 2.140389951 | -1.850305304 | 0.381247583 | 0.507698281 | EIF1AX-AS1 |
| ENSG00000140262 | 1313.624603 | 1107.417214 | 0.246191944  | 0.381408617 | 0.507886693 | TCF12      |
| ENSG00000248202 | 5.123708482 | 1.722487775 | 1.558207295  | 0.381434215 | 0.507894749 | LINC02234  |
| ENSG00000183607 | 0.307102255 | 1.762625967 | -2.440711575 | 0.381537652 | 1           | GKN2       |
| ENSG00000286996 | 11.19637527 | 5.880541352 | 0.917182393  | 0.381587065 | 0.508072236 | AC099332.2 |
| ENSG00000137720 | 161.4822922 | 130.3300556 | 0.308535686  | 0.381622442 | 0.508093301 | C11orf1    |
| ENSG00000159496 | 7.053180132 | 3.566546002 | 0.977834822  | 0.381654022 | 0.508109308 | RGL4       |
| ENSG00000170262 | 3.077290793 | 0.713078025 | 2.10359402   | 0.381831247 | 0.508319206 | MRAP       |
| ENSG00000143028 | 73.8408329  | 45.05251566 | 0.709811765  | 0.381967497 | 0.508474537 | SYPL2      |
| ENSG00000073803 | 461.3727813 | 407.8935406 | 0.178160958  | 0.381991525 | 0.50848047  | MAP3K13    |
| ENSG00000165806 | 366.5621923 | 427.2367314 | -0.221384011 | 0.382064737 | 0.508549835 | CASP7      |
| ENSG00000285868 | 2.11063886  | 0.693008929 | 1.580849514  | 0.382082783 | 0.508549835 | AC008676.3 |
| ENSG00000108523 | 1365.028937 | 1575.645346 | -0.207204242 | 0.382179561 | 0.508652588 | RNF167     |
| ENSG00000264961 | 0.293240848 | 1.762625967 | -2.440698248 | 0.382320395 | 1           | MIR4730    |
| ENSG00000185013 | 0.293240848 | 1.762625967 | -2.440698248 | 0.382320395 | 1           | NT5C1B     |
| ENSG00000237550 | 90.35236996 | 68.88658711 | 0.39238991   | 0.382406081 | 0.508927998 | AC243919.1 |
| ENSG00000137802 | 597.8236824 | 499.1362989 | 0.260601802  | 0.382452187 | 0.508963288 | MAPKBP1    |
| novel.529       | 0.921306765 | 3.881790948 | -2.08150361  | 0.382537414 | 0.509050633 | -          |
| ENSG00000273679 | 0.616711807 | 2.211209725 | -1.845733537 | 0.382610023 | 0.509121178 | AC100757.1 |
| ENSG00000273369 | 10.93085724 | 6.808390448 | 0.681691025  | 0.38264268  | 0.509138557 | AC096586.2 |
| ENSG00000263818 | 3.914175465 | 1.345879667 | 1.510767122  | 0.382663429 | 0.50914009  | RDM1P5     |
| novel.751       | 2.158491326 | 0           | 3.442673231  | 0.382722782 | 1           | -          |
| ENSG00000166863 | 2.158491326 | 0           | 3.442673231  | 0.382722782 | 1           | TAC3       |
| ENSG00000179930 | 2.158491326 | 0           | 3.442673231  | 0.382722782 | 1           | ZNF648     |
| ENSG00000250620 | 2.158491326 | 0           | 3.442673231  | 0.382722782 | 1           | LINC02515  |
| novel.1092      | 2.158491326 | 0           | 3.442673231  | 0.382722782 | 1           | -          |
| ENSG00000269707 | 2.158491326 | 0           | 3.442673231  | 0.382722782 | 1           | AC018730.1 |
| ENSG00000257060 | 2.158491326 | 0           | 3.442673231  | 0.382722782 | 1           | AC091078.1 |
| ENSG00000236056 | 2.158491326 | 0           | 3.442673231  | 0.382722782 | 1           | GAPDHP14   |
| ENSG00000201595 | 2.158491326 | 0           | 3.442673231  | 0.382722782 | 1           | RNA5SP132  |
| ENSG00000229106 | 2.158491326 | 0           | 3.442673231  | 0.382722782 | 1           | BTBD6P1    |
| ENSG00000201003 | 2.158491326 | 0           | 3.442673231  | 0.382722782 | 1           | RF00418    |

|                 |             |             |              |             |             |            |
|-----------------|-------------|-------------|--------------|-------------|-------------|------------|
| ENSG00000251604 | 2.158491326 | 0           | 3.442673231  | 0.382722782 | 1           | LINC01385  |
| ENSG00000285292 | 2.158491326 | 0           | 3.442673231  | 0.382722782 | 1           | ABCF2      |
| ENSG00000228527 | 2.158491326 | 0           | 3.442673231  | 0.382722782 | 1           | AC016396.1 |
| ENSG00000258826 | 2.158491326 | 0           | 3.442673231  | 0.382722782 | 1           | LINC01147  |
| ENSG00000261469 | 2.158491326 | 0           | 3.442673231  | 0.382722782 | 1           | AC020978.4 |
| ENSG00000261226 | 2.158491326 | 0           | 3.442673231  | 0.382722782 | 1           | AC092384.3 |
| ENSG00000276700 | 2.158491326 | 0           | 3.442673231  | 0.382722782 | 1           | RNA5-8SN4  |
| ENSG00000206418 | 771.9387379 | 685.9811338 | 0.170688618  | 0.382741124 | 0.509217387 | RAB12      |
| ENSG00000116035 | 17.53330645 | 25.78245636 | -0.550243932 | 0.382901784 | 0.509405052 | VAX2       |
| ENSG00000197969 | 676.129119  | 537.7538211 | 0.33039632   | 0.382922358 | 0.509406338 | VPS13A     |
| ENSG00000271889 | 4.85686553  | 9.683083396 | -0.996113322 | 0.383066312 | 0.509561639 | AC016747.2 |
| ENSG00000215835 | 18.16638696 | 26.00950937 | -0.522772935 | 0.383078324 | 0.509561639 | AL596087.1 |
| ENSG00000239948 | 1.789675198 | 4.330374705 | -1.267091527 | 0.383107846 | 0.50957482  | RN7SL368P  |
| ENSG00000229598 | 3.882691704 | 7.225136749 | -0.888215656 | 0.383164074 | 0.509623518 | PRDX3P1    |
| ENSG00000175874 | 2.125753916 | 4.250098321 | -1.006788868 | 0.383235427 | 0.509692328 | CREG2      |
| ENSG00000278383 | 8.857970386 | 4.097846288 | 1.09519997   | 0.383281277 | 0.509720281 | AL031673.1 |
| ENSG00000100811 | 2280.65438  | 2035.647086 | 0.16407121   | 0.383306702 | 0.509720281 | YY1        |
| ENSG00000232719 | 0.89358395  | 2.567748738 | -1.506103027 | 0.383315301 | 0.509720281 | AC007272.1 |
| ENSG00000090905 | 1329.959779 | 1529.065134 | -0.201192697 | 0.383381238 | 0.509780874 | TNRC6A     |
| ENSG00000258920 | 54.08277702 | 39.7385325  | 0.43988864   | 0.383400111 | 0.509780874 | FOXN3-AS1  |
| ENSG00000267811 | 6.959982497 | 3.995060664 | 0.808054082  | 0.383430433 | 0.509795102 | AP001160.2 |
| ENSG00000136327 | 2.149715785 | 0           | 3.437034176  | 0.383520162 | 1           | NKX2-8     |
| ENSG00000229611 | 2.149715785 | 0           | 3.437034176  | 0.383520162 | 1           | AL354707.2 |
| ENSG00000286628 | 2.149715785 | 0           | 3.437034176  | 0.383520162 | 1           | AL096828.4 |
| ENSG00000283204 | 2.149715785 | 0           | 3.437034176  | 0.383520162 | 1           | MIR4434    |
| ENSG00000273361 | 2.149715785 | 0           | 3.437034176  | 0.383520162 | 1           | AC021016.3 |
| ENSG00000266602 | 2.149715785 | 0           | 3.437034176  | 0.383520162 | 1           | AP005262.2 |
| ENSG00000172548 | 6.068905845 | 3.32212083  | 0.884731582  | 0.383649797 | 0.510054583 | NIPAL4     |
| ENSG00000244515 | 1.83125942  | 4.444928691 | -1.294246772 | 0.38366486  | 0.510054583 | KRT18P34   |
| ENSG00000174446 | 344.8871585 | 284.1050823 | 0.278638974  | 0.383810431 | 0.510222002 | SNAPC5     |
| novel.1044      | 18.06058157 | 10.94624653 | 0.728025398  | 0.383836184 | 0.51023013  | -          |
| ENSG00000078900 | 4.850597286 | 1.782695063 | 1.440324917  | 0.383948904 | 0.510353857 | TP73       |
| ENSG00000203722 | 10.6753684  | 5.860343861 | 0.871267971  | 0.384039739 | 0.510448481 | RAET1G     |
| ENSG00000166266 | 654.5200982 | 728.0353783 | -0.15367505  | 0.38420629  | 0.510643729 | CUL5       |
| ENSG00000253676 | 0.909952655 | 2.496928964 | -1.459614206 | 0.384228366 | 0.510646948 | TAGLN2P1   |
| ENSG00000198759 | 1.230916317 | 4.228744955 | -1.776611967 | 0.384336908 | 0.510744201 | EGFL6      |
| ENSG00000204104 | 482.9838797 | 414.832397  | 0.219557813  | 0.384343684 | 0.510744201 | TRAF3IP1   |
| ENSG00000236498 | 7.457027504 | 3.515795324 | 1.079419943  | 0.384360518 | 0.510744201 | AC107081.2 |
| ENSG00000125485 | 267.0946116 | 323.7764722 | -0.278597071 | 0.38454601  | 0.510964552 | DDX31      |
| ENSG00000116350 | 1900.019564 | 2170.943191 | -0.192175826 | 0.384568589 | 0.510968421 | SRSF4      |
| ENSG00000234694 | 5.459787201 | 10.46826546 | -0.944687362 | 0.384915699 | 0.511392104 | AL139289.2 |
| ENSG00000088367 | 677.7132188 | 569.4063822 | 0.251140648  | 0.384926831 | 0.511392104 | EPB41L1    |
| ENSG00000230530 | 15.29067776 | 9.66070255  | 0.659053894  | 0.384954922 | 0.511393383 | LIMD1-AS1  |
| ENSG00000177738 | 120.6317804 | 140.0734275 | -0.215668513 | 0.38496716  | 0.511393383 | AC025171.1 |
| ENSG00000120215 | 15.35719277 | 9.822411193 | 0.650762064  | 0.385065305 | 0.511497607 | MLANA      |
| ENSG00000127954 | 347.7793612 | 132.6173974 | 1.390574127  | 0.385138143 | 0.511568205 | STEAP4     |
| ENSG00000285672 | 6.305447414 | 3.32212083  | 0.941062073  | 0.385188263 | 0.511608622 | AL160396.2 |
| ENSG00000176410 | 176.2081997 | 208.6620602 | -0.2451356   | 0.385280629 | 0.511705144 | DNAJC30    |
| ENSG00000174792 | 1.493927053 | 4.493239223 | -1.577575997 | 0.385494744 | 0.511963346 | ODAPH      |
| ENSG00000224324 | 0.586481695 | 2.10970837  | -1.833647536 | 0.385565115 | 0.512028524 | THAP5P1    |
| ENSG00000121053 | 5.348895942 | 2.120320855 | 1.332250861  | 0.385604815 | 0.512028524 | EPX        |

|                 |             |             |              |             |             |            |
|-----------------|-------------|-------------|--------------|-------------|-------------|------------|
| ENSG00000168385 | 10396.40974 | 11679.18195 | -0.167850648 | 0.385611923 | 0.512028524 | SEPT2      |
| ENSG00000111913 | 479.4707103 | 248.0625471 | 0.950407756  | 0.385622652 | 0.512028524 | RIPOR2     |
| ENSG00000267610 | 0.600343103 | 2.261960402 | -1.897540777 | 0.385827801 | 0.51223971  | AC007787.1 |
| ENSG00000226742 | 326.4261783 | 269.8961862 | 0.275257548  | 0.385836976 | 0.51223971  | HSBP1L1    |
| ENSG00000256538 | 3.62978143  | 1.130980201 | 1.704115424  | 0.385858698 | 0.51223971  | AC046130.2 |
| ENSG00000113658 | 1449.981581 | 1262.970639 | 0.199251832  | 0.385860566 | 0.51223971  | SMAD5      |
| ENSG00000196531 | 5774.054489 | 6635.883238 | -0.20070675  | 0.386139495 | 0.512575415 | NACA       |
| ENSG00000272645 | 168.3989108 | 134.6794719 | 0.322366785  | 0.386152904 | 0.512575415 | GTF2IP20   |
| ENSG00000235034 | 21.93087898 | 33.54488238 | -0.612084413 | 0.386304923 | 0.512751006 | C19orf81   |
| ENSG00000143387 | 1192.345688 | 778.3836968 | 0.615348208  | 0.386356159 | 0.512791128 | CTSK       |
| ENSG00000241458 | 5.128723077 | 2.506385574 | 1.032107084  | 0.386374625 | 0.512791128 | RPL7P19    |
| ENSG0000042286  | 488.3912535 | 409.5084565 | 0.253578109  | 0.386416634 | 0.512820687 | AIFM2      |
| ENSG00000260022 | 1.215801261 | 2.873537073 | -1.243325668 | 0.386544128 | 0.512939397 | AL031716.1 |
| ENSG00000240731 | 46.0791002  | 58.50471541 | -0.341639911 | 0.386556558 | 0.512939397 | AL139287.1 |
| novel.394       | 10.68045426 | 6.339737595 | 0.742549888  | 0.386565313 | 0.512939397 | -          |
| novel.129       | 1.21705491  | 0           | 2.616235889  | 0.386632843 | 1           | -          |
| novel.308       | 1.21705491  | 0           | 2.616235889  | 0.386632843 | 1           | -          |
| ENSG00000260918 | 1.21705491  | 0           | 2.616235889  | 0.386632843 | 1           | AC107398.3 |
| ENSG00000272922 | 1.21705491  | 0           | 2.616235889  | 0.386632843 | 1           | AC107294.1 |
| novel.696       | 1.21705491  | 0           | 2.616235889  | 0.386632843 | 1           | -          |
| ENSG00000287645 | 1.21705491  | 0           | 2.616235889  | 0.386632843 | 1           | AC092939.1 |
| ENSG00000250415 | 1.21705491  | 0           | 2.616235889  | 0.386632843 | 1           | AC022113.1 |
| ENSG00000249203 | 1.21705491  | 0           | 2.616235889  | 0.386632843 | 1           | LINC02224  |
| ENSG00000179460 | 1.21705491  | 0           | 2.616235889  | 0.386632843 | 1           | EEF1A1P27  |
| ENSG00000255418 | 1.21705491  | 0           | 2.616235889  | 0.386632843 | 1           | AC090092.1 |
| ENSG00000271623 | 1.21705491  | 0           | 2.616235889  | 0.386632843 | 1           | AC138894.3 |
| ENSG00000235029 | 1.21705491  | 0           | 2.616235889  | 0.386632843 | 1           | MXN1-AS2   |
| ENSG00000225725 | 1.21705491  | 0           | 2.616235889  | 0.386632843 | 1           | FAM66E     |
| ENSG00000220694 | 1.21705491  | 0           | 2.616235889  | 0.386632843 | 1           | AL096711.1 |
| ENSG00000280234 | 1.21705491  | 0           | 2.616235889  | 0.386632843 | 1           | AC124303.1 |
| ENSG00000287470 | 1.21705491  | 0           | 2.616235889  | 0.386632843 | 1           | AP001037.1 |
| ENSG00000227850 | 1.21705491  | 0           | 2.616235889  | 0.386632843 | 1           | SEPT2P1    |
| ENSG00000240710 | 1.21705491  | 0           | 2.616235889  | 0.386632843 | 1           | AL512306.3 |
| ENSG00000221445 | 1.21705491  | 0           | 2.616235889  | 0.386632843 | 1           | MIR1301    |
| ENSG00000230649 | 1.21705491  | 0           | 2.616235889  | 0.386632843 | 1           | AC024084.1 |
| ENSG00000228024 | 1.21705491  | 0           | 2.616235889  | 0.386632843 | 1           | CYP1D1P    |
| ENSG00000225899 | 1.21705491  | 0           | 2.616235889  | 0.386632843 | 1           | FRG2B      |
| ENSG00000180389 | 1.21705491  | 0           | 2.616235889  | 0.386632843 | 1           | ATP5F1EP2  |
| ENSG00000231249 | 4.850597286 | 8.508368983 | -0.801857673 | 0.386830085 | 0.513264513 | ITPR1-DT   |
| ENSG00000137449 | 823.4992499 | 661.8885352 | 0.314721921  | 0.386892324 | 0.51332088  | CPEB2      |
| ENSG00000242142 | 1.215801261 | 0           | 2.614939712  | 0.386953316 | 1           | SERBP1P3   |
| novel.258       | 1.215801261 | 0           | 2.614939712  | 0.386953316 | 1           | -          |
| ENSG00000287709 | 1.215801261 | 0           | 2.614939712  | 0.386953316 | 1           | AC008780.2 |
| ENSG00000236674 | 1.215801261 | 0           | 2.614939712  | 0.386953316 | 1           | AL049636.1 |
| ENSG00000276406 | 1.215801261 | 0           | 2.614939712  | 0.386953316 | 1           | AC015726.2 |
| ENSG00000266928 | 1.215801261 | 0           | 2.614939712  | 0.386953316 | 1           | AC020905.1 |
| ENSG00000263787 | 1.215801261 | 0           | 2.614939712  | 0.386953316 | 1           | SKAP1-AS1  |
| ENSG00000204872 | 1.215801261 | 0           | 2.614939712  | 0.386953316 | 1           | NAT8B      |
| ENSG00000287899 | 1.215801261 | 0           | 2.614939712  | 0.386953316 | 1           | AC055714.1 |
| ENSG00000118733 | 1.215801261 | 0           | 2.614939712  | 0.386953316 | 1           | OLFM3      |
| ENSG00000254213 | 1.215801261 | 0           | 2.614939712  | 0.386953316 | 1           | PRXL2AP2   |

|                 |             |             |              |             |             |              |
|-----------------|-------------|-------------|--------------|-------------|-------------|--------------|
| ENSG00000281406 | 1.215801261 | 0           | 2.614939712  | 0.386953316 | 1           | BLACAT1      |
| ENSG00000235371 | 1.215801261 | 0           | 2.614939712  | 0.386953316 | 1           | AL122018.1   |
| ENSG00000287389 | 1.215801261 | 0           | 2.614939712  | 0.386953316 | 1           | AC007106.2   |
| ENSG00000287079 | 1.215801261 | 0           | 2.614939712  | 0.386953316 | 1           | AL109806.2   |
| ENSG00000171603 | 5163.364522 | 4414.553687 | 0.226091811  | 0.386978154 | 0.513408539 | CLSTN1       |
| ENSG00000177335 | 9.117220175 | 14.27564062 | -0.649999127 | 0.387149893 | 0.51361016  | C8orf31      |
| ENSG00000154710 | 146.3834237 | 124.8725063 | 0.228026878  | 0.387207697 | 0.513644153 | RABGEF1      |
| ENSG00000275160 | 8.91975553  | 17.36394876 | -0.962731501 | 0.387219624 | 0.513644153 | AL354718.1   |
| ENSG00000214432 | 4.839243176 | 2.038888596 | 1.221271224  | 0.387234826 | 0.513644153 | VPS33B-DT    |
| ENSG00000272662 | 0.293240848 | 1.733100261 | -2.418899301 | 0.387345758 | 1           | AC073352.1   |
| ENSG00000225498 | 0.293240848 | 1.733100261 | -2.418899301 | 0.387345758 | 1           | AC002064.1   |
| ENSG00000284651 | 0.293240848 | 1.733100261 | -2.418899301 | 0.387345758 | 1           | AP000553.6   |
| ENSG00000260123 | 3.680141193 | 1.365948763 | 1.400854367  | 0.387387737 | 0.513820747 | AC013565.1   |
| ENSG00000251595 | 41.74693122 | 30.59594921 | 0.447493584  | 0.387566726 | 0.514024974 | ABCA11P      |
| ENSG00000107518 | 7.696361105 | 2.772035718 | 1.46249261   | 0.387597451 | 0.514024974 | ATRNL1       |
| ENSG00000260361 | 3.688988006 | 1.130980201 | 1.724589113  | 0.387601818 | 0.514024974 | AC106028.3   |
| ENSG00000218418 | 47.9521573  | 38.01232031 | 0.33418942   | 0.387626894 | 0.514024974 | AL591135.1   |
| ENSG00000169862 | 14.28125923 | 8.130604999 | 0.820205241  | 0.387652651 | 0.514024974 | CTNND2       |
| ENSG00000049618 | 1151.104747 | 1003.345833 | 0.198419977  | 0.387660419 | 0.514024974 | ARID1B       |
| ENSG00000237686 | 9.509713437 | 22.94546146 | -1.267060613 | 0.38770469  | 0.514057441 | AL109615.3   |
| ENSG00000269904 | 1.524157165 | 0.387220594 | 1.978072759  | 0.387771098 | 1           | MAP2K4P1     |
| ENSG00000261687 | 1.524157165 | 0.387220594 | 1.978072759  | 0.387771098 | 1           | AC068724.1   |
| ENSG00000224459 | 1.524157165 | 0.387220594 | 1.978072759  | 0.387771098 | 1           | SLC25A34-AS1 |
| ENSG00000054611 | 582.0988263 | 688.7325056 | -0.242560842 | 0.387836716 | 0.514206252 | TBC1D22A     |
| ENSG00000287091 | 14.06108637 | 22.52208387 | -0.68472205  | 0.387916406 | 0.514285664 | AC009961.4   |
| ENSG00000121067 | 926.7603989 | 811.8794074 | 0.190676253  | 0.388070384 | 0.51446355  | SPOP         |
| ENSG00000120071 | 34.53153115 | 22.0897164  | 0.649501157  | 0.388192912 | 0.514599727 | KANSL1       |
| ENSG00000278979 | 2.124500267 | 0.723690511 | 1.559577087  | 0.388333462 | 0.514759779 | AC007598.3   |
| ENSG00000279971 | 0           | 1.782695063 | -3.415972101 | 0.38836564  | 1           | AC020910.6   |
| ENSG00000278259 | 0           | 1.782695063 | -3.415972101 | 0.38836564  | 1           | MYO19        |
| ENSG00000096395 | 0           | 1.782695063 | -3.415972101 | 0.38836564  | 1           | MLN          |
| ENSG00000270159 | 0           | 1.782695063 | -3.415972101 | 0.38836564  | 1           | AC018695.3   |
| ENSG00000234247 | 0           | 1.782695063 | -3.415972101 | 0.38836564  | 1           | AC096537.2   |
| ENSG00000251273 | 0           | 1.782695063 | -3.415972101 | 0.38836564  | 1           | LINC02228    |
| ENSG00000285603 | 0           | 1.782695063 | -3.415972101 | 0.38836564  | 1           | AL035693.1   |
| ENSG00000214344 | 0           | 1.782695063 | -3.415972101 | 0.38836564  | 1           | OR4F13P      |
| ENSG00000104827 | 0           | 1.782695063 | -3.415972101 | 0.38836564  | 1           | CGB3         |
| ENSG00000235347 | 0           | 1.782695063 | -3.415972101 | 0.38836564  | 1           | Z84478.1     |
| ENSG00000279355 | 12.50634308 | 7.25581833  | 0.792126708  | 0.3885511   | 0.515021995 | AGPAT4-IT1   |
| ENSG00000211673 | 2.775203133 | 0.336469917 | 2.843304313  | 0.38861524  | 0.515080734 | IGLV3-1      |
| ENSG00000237280 | 1.201939854 | 3.281982638 | -1.441002039 | 0.388730465 | 0.515207173 | AL136982.3   |
| ENSG00000170469 | 27.5255193  | 39.15506887 | -0.510105964 | 0.388773493 | 0.515235554 | SPATA24      |
| ENSG00000178896 | 279.1529723 | 348.3116909 | -0.319952339 | 0.388791541 | 0.515235554 | EXOSC4       |
| ENSG00000227256 | 5.448433091 | 2.833398881 | 0.935885001  | 0.38884287  | 0.515277293 | MIS18A-AS1   |
| ENSG00000223949 | 0           | 1.487519214 | -3.150001507 | 0.388970208 | 1           | ROR1-AS1     |
| ENSG00000144331 | 0           | 1.487519214 | -3.150001507 | 0.388970208 | 1           | ZNF385B      |
| ENSG00000234017 | 0           | 1.487519214 | -3.150001507 | 0.388970208 | 1           | AC022018.1   |
| ENSG00000284522 | 0           | 1.487519214 | -3.150001507 | 0.388970208 | 1           | AC006927.3   |
| ENSG00000215267 | 0           | 1.487519214 | -3.150001507 | 0.388970208 | 1           | AKR1C7P      |
| ENSG00000287624 | 0           | 1.487519214 | -3.150001507 | 0.388970208 | 1           | AL590666.5   |
| ENSG00000213872 | 0           | 1.487519214 | -3.150001507 | 0.388970208 | 1           | AC092798.1   |

|                 |             |             |              |             |             |            |
|-----------------|-------------|-------------|--------------|-------------|-------------|------------|
| ENSG00000231057 | 0           | 1.487519214 | -3.150001507 | 0.388970208 | 1           | AC096637.2 |
| ENSG00000229991 | 0           | 1.487519214 | -3.150001507 | 0.388970208 | 1           | AKR1B1P1   |
| ENSG00000200114 | 0           | 1.487519214 | -3.150001507 | 0.388970208 | 1           | RNA5SP123  |
| ENSG00000220575 | 0           | 1.487519214 | -3.150001507 | 0.388970208 | 1           | HTR5A-AS1  |
| ENSG00000198573 | 0           | 1.487519214 | -3.150001507 | 0.388970208 | 1           | SPANXC     |
| ENSG00000224488 | 0           | 1.487519214 | -3.150001507 | 0.388970208 | 1           | SAMM50P1   |
| ENSG00000234373 | 0           | 1.487519214 | -3.150001507 | 0.388970208 | 1           | SNX18P7    |
| ENSG00000254826 | 0           | 1.487519214 | -3.150001507 | 0.388970208 | 1           | AP001922.3 |
| ENSG00000287235 | 0           | 1.487519214 | -3.150001507 | 0.388970208 | 1           | AL732437.2 |
| ENSG00000226982 | 0           | 1.487519214 | -3.150001507 | 0.388970208 | 1           | CENPCP1    |
| ENSG00000271216 | 0           | 1.487519214 | -3.150001507 | 0.388970208 | 1           | LINC01050  |
| ENSG00000252887 | 0           | 1.487519214 | -3.150001507 | 0.388970208 | 1           | RNU6-430P  |
| ENSG00000250838 | 0           | 1.487519214 | -3.150001507 | 0.388970208 | 1           | AC091133.2 |
| ENSG00000267920 | 0           | 1.487519214 | -3.150001507 | 0.388970208 | 1           | SNX6P1     |
| ENSG00000228235 | 0           | 1.487519214 | -3.150001507 | 0.388970208 | 1           | AP001476.3 |
| ENSG00000287652 | 2.763920295 | 0.356539013 | 2.837700475  | 0.389037638 | 0.515482806 | AC000082.1 |
| ENSG00000273870 | 2.763920295 | 0.356539013 | 2.837700475  | 0.389037638 | 0.515482806 | AL138721.1 |
| ENSG00000287878 | 22.45571807 | 15.37581084 | 0.552294548  | 0.389165129 | 0.515625438 | AC022382.2 |
| ENSG00000166167 | 475.9013233 | 537.1099409 | -0.17410853  | 0.389197361 | 0.515641847 | BTRC       |
| ENSG00000169504 | 13602.18722 | 11009.64326 | 0.305044681  | 0.389259055 | 0.515697288 | CLIC4      |
| novel.726       | 185.6807028 | 233.5856082 | -0.330821568 | 0.389301736 | 0.515727534 | -          |
| ENSG00000269246 | 1.524157165 | 0.356539013 | 1.978088472  | 0.389378862 | 1           | AC011445.2 |
| ENSG00000230684 | 1.524157165 | 0.356539013 | 1.978088472  | 0.389378862 | 1           | AL158207.2 |
| ENSG00000113163 | 906.715984  | 763.8389506 | 0.247747992  | 0.389417457 | 0.515854533 | COL4A3BP   |
| ENSG00000128309 | 1036.939938 | 1285.734687 | -0.310094405 | 0.389840304 | 0.516365616 | MPST       |
| ENSG00000183171 | 9.054252652 | 4.882899962 | 0.880571945  | 0.389843022 | 0.516365616 | BX322650.1 |
| ENSG00000260246 | 0           | 1.518200796 | -3.177282299 | 0.389852774 | 1           | AC000032.1 |
| ENSG00000254560 | 0           | 1.518200796 | -3.177282299 | 0.389852774 | 1           | BBOX1-AS1  |
| ENSG00000262662 | 0           | 1.518200796 | -3.177282299 | 0.389852774 | 1           | AC127496.4 |
| ENSG00000226658 | 0           | 1.518200796 | -3.177282299 | 0.389852774 | 1           | RPL23AP30  |
| ENSG00000282787 | 0           | 1.518200796 | -3.177282299 | 0.389852774 | 1           | AL157888.1 |
| ENSG00000262959 | 0           | 1.518200796 | -3.177282299 | 0.389852774 | 1           | RPL23AP86  |
| ENSG00000176194 | 0           | 1.518200796 | -3.177282299 | 0.389852774 | 1           | CIDEA      |
| ENSG00000155070 | 0           | 1.518200796 | -3.177282299 | 0.389852774 | 1           | UNC93B2    |
| ENSG00000253384 | 0           | 1.518200796 | -3.177282299 | 0.389852774 | 1           | AC124242.2 |
| ENSG00000257987 | 0           | 1.518200796 | -3.177282299 | 0.389852774 | 1           | TEX49      |
| ENSG00000287167 | 0           | 1.518200796 | -3.177282299 | 0.389852774 | 1           | AL133313.1 |
| ENSG00000168634 | 0           | 1.518200796 | -3.177282299 | 0.389852774 | 1           | WFDC13     |
| ENSG00000235215 | 0           | 1.518200796 | -3.177282299 | 0.389852774 | 1           | AL592431.1 |
| ENSG00000221203 | 0           | 1.518200796 | -3.177282299 | 0.389852774 | 1           | MIR1262    |
| ENSG00000253628 | 0           | 1.518200796 | -3.177282299 | 0.389852774 | 1           | AC110011.1 |
| ENSG00000233844 | 0           | 1.518200796 | -3.177282299 | 0.389852774 | 1           | KCNQ5-IT1  |
| ENSG00000273234 | 0           | 1.518200796 | -3.177282299 | 0.389852774 | 1           | OR2A13P    |
| ENSG00000258393 | 0           | 1.518200796 | -3.177282299 | 0.389852774 | 1           | AL049833.1 |
| ENSG00000199730 | 0           | 1.518200796 | -3.177282299 | 0.389852774 | 1           | RN7SKP95   |
| ENSG00000260375 | 0           | 1.518200796 | -3.177282299 | 0.389852774 | 1           | AC126323.4 |
| ENSG00000266232 | 0           | 1.518200796 | -3.177282299 | 0.389852774 | 1           | MIR3178    |
| ENSG00000159224 | 0           | 1.518200796 | -3.177282299 | 0.389852774 | 1           | GIP        |
| ENSG00000270324 | 0           | 1.518200796 | -3.177282299 | 0.389852774 | 1           | AC005972.1 |
| ENSG00000238575 | 0           | 1.518200796 | -3.177282299 | 0.389852774 | 1           | RF01233    |
| ENSG00000184459 | 0           | 1.518200796 | -3.177282299 | 0.389852774 | 1           | BPIFC      |



|                 |             |             |              |             |             |             |
|-----------------|-------------|-------------|--------------|-------------|-------------|-------------|
| novel.649       | 0           | 1.518200796 | -3.177282299 | 0.389852774 | 1           | -           |
| ENSG00000139826 | 365.829504  | 323.562763  | 0.177013298  | 0.389929488 | 0.516453815 | ABHD13      |
| ENSG00000275888 | 28.83527365 | 40.20102079 | -0.476210986 | 0.389993837 | 0.516512713 | AC132872.3  |
| ENSG00000258400 | 2.388764651 | 0.672939833 | 1.791259907  | 0.390045419 | 0.516554696 | AL591767.1  |
| ENSG00000162694 | 492.9567737 | 607.8560912 | -0.302795238 | 0.390137515 | 0.516650327 | EXTL2       |
| ENSG00000247373 | 36.36787644 | 48.672976   | -0.419481827 | 0.390173844 | 0.516672102 | AC055713.1  |
| ENSG00000101844 | 284.7186793 | 242.8122735 | 0.22914012   | 0.390318553 | 0.516837384 | ATG4A       |
| ENSG00000204231 | 1.524157165 | 0.336469917 | 1.978098831  | 0.390446839 | 1           | RXRB        |
| ENSG00000260392 | 1.524157165 | 0.336469917 | 1.978098831  | 0.390446839 | 1           | AC090518.1  |
| ENSG00000250107 | 1.510295757 | 0.387220594 | 1.967409385  | 0.390448092 | 1           | CACNA1G-AS1 |
| ENSG00000287975 | 1.510295757 | 0.387220594 | 1.967409385  | 0.390448092 | 1           | AC113143.3  |
| ENSG00000250629 | 1.510295757 | 0.387220594 | 1.967409385  | 0.390448092 | 1           | AC091435.2  |
| ENSG00000177947 | 1.49643435  | 3.61729668  | -1.265366048 | 0.390518517 | 0.517075812 | ODF3        |
| ENSG00000179796 | 1.201939854 | 0           | 2.600450164  | 0.390536938 | 1           | LRR3B       |
| ENSG00000180287 | 1.201939854 | 0           | 2.600450164  | 0.390536938 | 1           | PLD5        |
| ENSG00000237169 | 1.201939854 | 0           | 2.600450164  | 0.390536938 | 1           | RPL12P27    |
| ENSG00000265942 | 1.201939854 | 0           | 2.600450164  | 0.390536938 | 1           | RN7SL577P   |
| ENSG00000237158 | 1.201939854 | 0           | 2.600450164  | 0.390536938 | 1           | AL353718.1  |
| ENSG00000091664 | 1.201939854 | 0           | 2.600450164  | 0.390536938 | 1           | SLC17A6     |
| ENSG00000269420 | 1.201939854 | 0           | 2.600450164  | 0.390536938 | 1           | PLA2G4C-AS1 |
| ENSG00000237162 | 1.201939854 | 0           | 2.600450164  | 0.390536938 | 1           | AC007098.2  |
| ENSG00000287473 | 1.201939854 | 0           | 2.600450164  | 0.390536938 | 1           | AL359382.2  |
| ENSG00000261451 | 1.201939854 | 0           | 2.600450164  | 0.390536938 | 1           | AC104964.3  |
| ENSG00000148482 | 1.201939854 | 0           | 2.600450164  | 0.390536938 | 1           | SLC39A12    |
| ENSG00000229241 | 1.201939854 | 0           | 2.600450164  | 0.390536938 | 1           | PNPT1P1     |
| ENSG00000225415 | 1.201939854 | 0           | 2.600450164  | 0.390536938 | 1           | CCRL1P1     |
| ENSG00000227436 | 1.201939854 | 0           | 2.600450164  | 0.390536938 | 1           | FCF1P1      |
| ENSG00000242353 | 1.201939854 | 0           | 2.600450164  | 0.390536938 | 1           | RPL12P30    |
| ENSG00000257431 | 1.201939854 | 0           | 2.600450164  | 0.390536938 | 1           | AC089998.1  |
| ENSG00000267360 | 1.201939854 | 0           | 2.600450164  | 0.390536938 | 1           | AC012309.1  |
| ENSG00000186118 | 1.509042109 | 0.387220594 | 1.966451963  | 0.390689704 | 1           | TEX38       |
| ENSG00000280334 | 15.84037637 | 9.478924811 | 0.736441247  | 0.390701775 | 0.517270069 | AC009084.2  |
| ENSG00000132434 | 501.9571343 | 428.474654  | 0.227759502  | 0.390705047 | 0.517270069 | LANCL2      |
| ENSG00000173409 | 304.4841149 | 353.5852659 | -0.216407841 | 0.390834013 | 0.51736796  | ARV1        |
| ENSG00000115211 | 787.8401603 | 930.0732319 | -0.239438452 | 0.390845802 | 0.51736796  | EIF2B4      |
| ENSG00000124356 | 1010.583146 | 909.8843818 | 0.151496649  | 0.39084828  | 0.51736796  | STAMPB      |
| ENSG00000234740 | 1.773306493 | 4.310305609 | -1.270998073 | 0.390858639 | 0.51736796  | AL162386.2  |
| ENSG00000226942 | 6.094121362 | 3.179325408 | 0.928222241  | 0.390895527 | 0.517390427 | IL9RP3      |
| ENSG00000258568 | 4.252761481 | 7.684461386 | -0.863016305 | 0.390917535 | 0.517393198 | RHOQP1      |
| ENSG00000223583 | 3.603312264 | 1.365948763 | 1.374510714  | 0.390943476 | 0.517401175 | AL513365.1  |
| ENSG00000196118 | 14.08093128 | 21.35199296 | -0.599673542 | 0.391217257 | 0.517711149 | CCDC189     |
| ENSG00000188092 | 135.3958672 | 167.0759075 | -0.303077041 | 0.391217543 | 0.517711149 | GPR89B      |
| ENSG00000056050 | 455.1848776 | 528.5085937 | -0.215944758 | 0.391285284 | 0.51777442  | HPF1        |
| ENSG00000116478 | 1454.525152 | 1751.926786 | -0.2681837   | 0.391361316 | 0.51782966  | HDAC1       |
| ENSG00000219451 | 5.205552007 | 9.608667603 | -0.881391724 | 0.391374466 | 0.51782966  | RPL23P8     |
| ENSG00000272755 | 4.748552839 | 1.548882377 | 1.645071136  | 0.391386823 | 0.51782966  | AC245297.2  |
| ENSG00000213891 | 5.878678359 | 1.783850939 | 1.721632946  | 0.391415688 | 0.51784148  | RPL3P6      |
| ENSG00000245812 | 12.23609519 | 18.70152769 | -0.614317085 | 0.391604812 | 0.51806531  | LINC02202   |
| ENSG00000172986 | 188.644053  | 153.0320721 | 0.303255612  | 0.391648383 | 0.51809657  | GXYLT2      |
| ENSG00000287114 | 0.308355904 | 1.702418679 | -2.39680778  | 0.391658783 | 1           | AC104024.3  |
| ENSG00000229953 | 0.308355904 | 1.702418679 | -2.39680778  | 0.391658783 | 1           | AL590666.2  |

|                 |             |             |              |             |             |             |
|-----------------|-------------|-------------|--------------|-------------|-------------|-------------|
| ENSG00000267472 | 3.038213869 | 0.713078025 | 2.086729503  | 0.391856788 | 0.518345869 | ARHGAP27P2  |
| ENSG00000187889 | 0.586481695 | 2.649180997 | -2.153834746 | 0.391995567 | 0.518503045 | FYB2        |
| ENSG00000131711 | 4274.726427 | 3681.165891 | 0.215618684  | 0.392062714 | 0.518565461 | MAP1B       |
| ENSG00000254842 | 1.510295757 | 0.356539013 | 1.967404057  | 0.392074626 | 1           | LINC02551   |
| ENSG00000053770 | 643.4932792 | 559.5320301 | 0.201177706  | 0.392115275 | 0.518608581 | AP5M1       |
| ENSG00000119446 | 441.3806039 | 516.4504902 | -0.226799    | 0.392140717 | 0.518615829 | RBM18       |
| ENSG00000278879 | 1.509042109 | 0.356539013 | 1.966444628  | 0.392317963 | 1           | AP000560.1  |
| ENSG00000277186 | 4.918579403 | 1.161661783 | 2.102734479  | 0.392360147 | 0.518879618 | AC131212.1  |
| ENSG00000196700 | 678.8902598 | 804.7150855 | -0.245554131 | 0.392494072 | 0.51903031  | ZNF512B     |
| ENSG00000224079 | 0.293240848 | 1.702418679 | -2.396766515 | 0.392546667 | 1           | AC091729.1  |
| ENSG00000008853 | 654.8937433 | 535.1708623 | 0.290658248  | 0.392563898 | 0.519096226 | RHOBTB2     |
| ENSG00000235021 | 2.052685933 | 0           | 3.37316348   | 0.392623153 | 1           | AL591848.2  |
| ENSG00000226904 | 2.052685933 | 0           | 3.37316348   | 0.392623153 | 1           | AL353608.2  |
| ENSG00000272130 | 2.052685933 | 0           | 3.37316348   | 0.392623153 | 1           | AC091946.2  |
| ENSG00000223225 | 2.052685933 | 0           | 3.37316348   | 0.392623153 | 1           | RNU6-1054P  |
| ENSG00000235768 | 2.052685933 | 0           | 3.37316348   | 0.392623153 | 1           | BRD7P5      |
| ENSG00000232265 | 2.052685933 | 0           | 3.37316348   | 0.392623153 | 1           | AC239803.1  |
| ENSG00000279098 | 2.052685933 | 0           | 3.37316348   | 0.392623153 | 1           | AC097460.3  |
| ENSG00000170967 | 2.052685933 | 0           | 3.37316348   | 0.392623153 | 1           | DDI1        |
| ENSG00000273269 | 2.052685933 | 0           | 3.37316348   | 0.392623153 | 1           | AC073283.3  |
| ENSG00000225062 | 2.052685933 | 0           | 3.37316348   | 0.392623153 | 1           | CATIP-AS1   |
| ENSG00000267178 | 2.052685933 | 0           | 3.37316348   | 0.392623153 | 1           | PHF5CP      |
| novel.967       | 2.052685933 | 0           | 3.37316348   | 0.392623153 | 1           | -           |
| ENSG00000204584 | 11.04898566 | 6.420013979 | 0.783648794  | 0.392640619 | 0.519163313 | FLJ45513    |
| ENSG00000048471 | 519.9307427 | 422.1392575 | 0.301237216  | 0.392654597 | 0.519163313 | SNX29       |
| ENSG00000090776 | 1253.779832 | 929.4111142 | 0.431799415  | 0.392742174 | 0.519233411 | EFNB1       |
| ENSG00000151131 | 176.168838  | 219.3292185 | -0.317177705 | 0.392747584 | 0.519233411 | C12orf45    |
| ENSG00000174353 | 77.66554384 | 98.36854277 | -0.341566048 | 0.392899159 | 0.519400388 | STAG3L3     |
| ENSG00000249593 | 2.405133356 | 0.713078025 | 1.750378553  | 0.392913869 | 0.519400388 | AC011405.1  |
| ENSG00000132275 | 342.0815114 | 397.1702031 | -0.216192996 | 0.392934432 | 0.519401144 | RRP8        |
| ENSG00000111647 | 501.516532  | 435.2476794 | 0.204764482  | 0.393011443 | 0.519424435 | UHRF1BP1L   |
| ENSG00000213290 | 4.211177259 | 1.365948763 | 1.60503656   | 0.393026271 | 0.519424435 | PGK1P2      |
| ENSG00000207233 | 0.586481695 | 2.587817834 | -2.123048241 | 0.393042371 | 0.519424435 | SNORA37     |
| ENSG00000186591 | 2655.095878 | 3116.54163  | -0.231097681 | 0.393053999 | 0.519424435 | UBE2H       |
| ENSG00000229932 | 19.19858498 | 26.43429961 | -0.460925652 | 0.393066856 | 0.519424435 | YWHAZP3     |
| ENSG00000231394 | 3.697763547 | 1.110911105 | 1.746097579  | 0.393072007 | 0.519424435 | AC099681.2  |
| ENSG00000287275 | 6.552089444 | 2.71182843  | 1.255466482  | 0.393095973 | 0.519429686 | AC011451.4  |
| ENSG00000285624 | 1.510295757 | 0.336469917 | 1.967400543  | 0.393155138 | 1           | AC025062.3  |
| ENSG00000274011 | 1.510295757 | 0.336469917 | 1.967400543  | 0.393155138 | 1           | RF00017     |
| ENSG00000201492 | 1.510295757 | 0.336469917 | 1.967400543  | 0.393155138 | 1           | RNA5SP78    |
| ENSG00000203995 | 3.373038938 | 6.960770875 | -1.056213372 | 0.393215978 | 0.519536419 | ZYG11A      |
| ENSG00000105750 | 4.884588345 | 8.765846785 | -0.852581538 | 0.393216741 | 0.519536419 | ZNF85       |
| ENSG00000120333 | 549.3598347 | 474.778646  | 0.210116556  | 0.39333089  | 0.519660811 | MRPS14      |
| ENSG00000223786 | 0           | 1.080229524 | -2.691764961 | 0.393336078 | 1           | AL357507.1  |
| ENSG00000265407 | 0           | 1.080229524 | -2.691764961 | 0.393336078 | 1           | MIR4324     |
| ENSG00000199306 | 0           | 1.080229524 | -2.691764961 | 0.393336078 | 1           | RNU6-858P   |
| ENSG00000287214 | 0           | 1.080229524 | -2.691764961 | 0.393336078 | 1           | AC021321.2  |
| ENSG00000233786 | 0           | 1.080229524 | -2.691764961 | 0.393336078 | 1           | CDC27P1     |
| ENSG00000221518 | 0           | 1.080229524 | -2.691764961 | 0.393336078 | 1           | RNU6ATAC16P |
| ENSG00000283528 | 0           | 1.080229524 | -2.691764961 | 0.393336078 | 1           | TCAF2C      |
| ENSG00000127325 | 0           | 1.080229524 | -2.691764961 | 0.393336078 | 1           | BEST3       |

|                 |             |             |              |             |             |             |
|-----------------|-------------|-------------|--------------|-------------|-------------|-------------|
| ENSG00000117148 | 0           | 1.080229524 | -2.691764961 | 0.393336078 | 1           | ACTL8       |
| ENSG00000215895 | 0           | 1.080229524 | -2.691764961 | 0.393336078 | 1           | AL354702.1  |
| ENSG00000233339 | 0           | 1.080229524 | -2.691764961 | 0.393336078 | 1           | AC018878.1  |
| ENSG00000250910 | 0           | 1.080229524 | -2.691764961 | 0.393336078 | 1           | AC097467.3  |
| ENSG00000240869 | 0           | 1.080229524 | -2.691764961 | 0.393336078 | 1           | RN7SL128P   |
| ENSG00000251733 | 0           | 1.080229524 | -2.691764961 | 0.393336078 | 1           | SCARNA8     |
| ENSG00000213275 | 0           | 1.080229524 | -2.691764961 | 0.393336078 | 1           | IFITM9P     |
| ENSG00000236972 | 0           | 1.080229524 | -2.691764961 | 0.393336078 | 1           | FABP5P1     |
| ENSG00000261266 | 0           | 1.080229524 | -2.691764961 | 0.393336078 | 1           | AC008870.3  |
| ENSG00000260865 | 0           | 1.080229524 | -2.691764961 | 0.393336078 | 1           | AC010287.1  |
| ENSG00000144043 | 1168.605058 | 1332.823535 | -0.189878884 | 0.393361034 | 0.519674211 | TEX261      |
| ENSG00000235079 | 4.719576376 | 1.456837632 | 1.703098369  | 0.393561992 | 0.519885502 | ZRANB2-AS1  |
| ENSG00000150455 | 106.6193019 | 85.47185636 | 0.318166834  | 0.393575869 | 0.519885502 | TIRAP       |
| ENSG00000273901 | 2.111892509 | 0.693008929 | 1.582479796  | 0.393580999 | 0.519885502 | AC012313.9  |
| ENSG00000106733 | 382.774078  | 319.8648988 | 0.258218314  | 0.393679525 | 0.519989209 | NMRK1       |
| ENSG00000232387 | 0.909952655 | 2.527610546 | -1.472769166 | 0.393719067 | 0.520015001 | SKA2P1      |
| ENSG00000273763 | 6.417592322 | 10.56861094 | -0.728647606 | 0.393762431 | 0.520045838 | AC007318.2  |
| ENSG00000104691 | 183.8215349 | 216.2118985 | -0.235384759 | 0.393870459 | 0.52016207  | UBXN8       |
| ENSG00000231023 | 0           | 1.4981317   | -3.15937665  | 0.393974694 | 1           | LINC00326   |
| ENSG00000287771 | 0           | 1.4981317   | -3.15937665  | 0.393974694 | 1           | AC007271.1  |
| ENSG00000254002 | 0           | 1.4981317   | -3.15937665  | 0.393974694 | 1           | AC012574.2  |
| ENSG00000236773 | 4.235139127 | 2.10970837  | 0.992186596  | 0.393989276 | 0.520273914 | AC092809.3  |
| ENSG00000112981 | 60.02506364 | 39.63818702 | 0.595438638  | 0.394017732 | 0.520273914 | NME5        |
| ENSG00000158006 | 377.2661105 | 335.3001806 | 0.169978469  | 0.394027319 | 0.520273914 | PAFAH2      |
| ENSG00000285601 | 1.230916317 | 3.749479616 | -1.605402344 | 0.394035249 | 0.520273914 | AC084262.2  |
| ENSG00000266385 | 2.125753916 | 0.743759607 | 1.539984242  | 0.394152043 | 0.5203925   | AC005899.5  |
| ENSG00000101079 | 905.249024  | 784.7815648 | 0.206359654  | 0.394178578 | 0.5203925   | NDRG3       |
| ENSG00000110536 | 58.02098563 | 70.623493   | -0.284817331 | 0.394185151 | 0.5203925   | PTPMT1      |
| ENSG00000171772 | 4.609041122 | 1.406086955 | 1.703327697  | 0.394248335 | 0.520449468 | SYCE1       |
| ENSG00000133112 | 22501.724   | 19351.23759 | 0.217612004  | 0.394277611 | 0.520456294 | TPT1        |
| ENSG00000273117 | 37.23896563 | 46.96940144 | -0.335244309 | 0.394304935 | 0.520456294 | AC144652.1  |
| ENSG00000174912 | 9.702448221 | 14.00168974 | -0.529834834 | 0.394316652 | 0.520456294 | METTL15P1   |
| ENSG00000236939 | 2.124500267 | 0.743759607 | 1.539338614  | 0.394333634 | 0.520456294 | BAALC-AS2   |
| ENSG00000167685 | 668.4263603 | 807.2931178 | -0.27191501  | 0.394447592 | 0.520580255 | ZNF444      |
| ENSG00000268366 | 12.32266858 | 6.664310756 | 0.89649542   | 0.394542895 | 0.520679583 | AC010271.1  |
| novel.807       | 145.8513203 | 92.6145337  | 0.65636198   | 0.394623069 | 0.520747111 | -           |
| ENSG00000182902 | 24.58523293 | 17.34747569 | 0.497889149  | 0.394643155 | 0.520747111 | SLC25A18    |
| ENSG00000214185 | 7.298568513 | 11.09862696 | -0.607649103 | 0.394654194 | 0.520747111 | XPOTP1      |
| ENSG00000254682 | 58.91177755 | 75.74221343 | -0.35988374  | 0.394766314 | 0.520800883 | AP002387.2  |
| ENSG00000274600 | 3.052075276 | 1.10029862  | 1.481722173  | 0.394769283 | 0.520800883 | RIMBP3B     |
| ENSG00000178222 | 53.24248706 | 29.56415861 | 0.847596179  | 0.394777184 | 0.520800883 | RNF212      |
| ENSG00000233825 | 5.410609815 | 2.456790772 | 1.1308899    | 0.39478236  | 0.520800883 | AL391839.2  |
| ENSG00000114030 | 708.1828452 | 801.5087089 | -0.178900729 | 0.394813417 | 0.520800883 | KPNA1       |
| ENSG00000239821 | 0.616711807 | 2.241891306 | -1.862240508 | 0.394815218 | 0.520800883 | RN7SL513P   |
| ENSG00000165985 | 4.593926066 | 1.345879667 | 1.747701189  | 0.394962296 | 0.520968442 | C1QL3       |
| novel.457       | 28.64845111 | 50.59820969 | -0.818271975 | 0.394995623 | 0.520985952 | -           |
| ENSG00000143631 | 34.14599031 | 19.9717073  | 0.778790953  | 0.395042801 | 0.521018154 | FLG         |
| ENSG00000157106 | 2229.473985 | 1878.191108 | 0.247423954  | 0.395060145 | 0.521018154 | SMG1        |
| ENSG00000183978 | 797.506549  | 680.9759187 | 0.22751209   | 0.395192528 | 0.521166289 | COA3        |
| ENSG00000258535 | 2.962638588 | 0.672939833 | 2.111696501  | 0.395382875 | 0.521390847 | AL079307.1  |
| ENSG00000227591 | 2.15473038  | 4.758889366 | -1.144817468 | 0.395406484 | 0.521395517 | HSD11B1-AS1 |

|                 |             |             |              |             |             |            |
|-----------------|-------------|-------------|--------------|-------------|-------------|------------|
| ENSG00000129317 | 429.9291552 | 513.0946865 | -0.254987416 | 0.395659021 | 0.521702042 | PUS7L      |
| ENSG00000042062 | 185.0439594 | 311.8891234 | -0.752884017 | 0.395855507 | 0.521934632 | RIPOR3     |
| ENSG00000185361 | 586.0153346 | 418.6075967 | 0.485246274  | 0.395887154 | 0.521944094 | TNFAIP8L1  |
| ENSG00000243701 | 297.2092669 | 236.5764771 | 0.328163804  | 0.395902862 | 0.521944094 | DUBR       |
| ENSG00000180071 | 9.187496126 | 3.852265241 | 1.249817296  | 0.395930421 | 0.521953941 | ANKRD18A   |
| ENSG00000104522 | 12.3667601  | 20.65641549 | -0.735466796 | 0.396301374 | 0.522380341 | TSTA3      |
| ENSG00000259125 | 1.801029308 | 4.381125383 | -1.275117429 | 0.396311376 | 0.522380341 | LRP1-AS    |
| ENSG00000263327 | 55.10376348 | 38.40454959 | 0.516216396  | 0.396314187 | 0.522380341 | TAPT1-AS1  |
| ENSG00000222108 | 1.774560141 | 4.250098321 | -1.253304357 | 0.396342859 | 0.52239163  | RNA5SP317  |
| ENSG00000196659 | 88.97359331 | 69.39101144 | 0.357296094  | 0.396448672 | 0.522504588 | TTC30B     |
| ENSG00000214087 | 607.3157446 | 713.0728249 | -0.232025322 | 0.396692655 | 0.522799628 | ARL16      |
| ENSG00000170502 | 684.0686707 | 592.7102277 | 0.20661253   | 0.3970102   | 0.52316641  | NUDT9      |
| ENSG00000230736 | 6.564697203 | 3.280826763 | 1.010094635  | 0.397016269 | 0.52316641  | AL021937.1 |
| ENSG00000274615 | 24.44418283 | 15.1398148  | 0.692105867  | 0.397031373 | 0.52316641  | AC233968.1 |
| ENSG00000235532 | 3.073529847 | 0.713078025 | 2.102293564  | 0.397161911 | 0.523311878 | LINC00402  |
| ENSG00000170385 | 599.4142829 | 454.1817608 | 0.399720347  | 0.397193127 | 0.523326469 | SLC30A1    |
| ENSG00000123472 | 735.344847  | 840.4005678 | -0.192976056 | 0.397221964 | 0.523337924 | ATPAF1     |
| ENSG00000232346 | 110.3656296 | 143.840502  | -0.382692    | 0.397317109 | 0.523436733 | Z74021.1   |
| ENSG00000265750 | 11.55258364 | 7.470717796 | 0.623388333  | 0.39737474  | 0.523486113 | AC090772.3 |
| ENSG00000287093 | 0           | 1.447381022 | -3.11343089  | 0.397542592 | 1           | AC003093.1 |
| ENSG00000283178 | 0           | 1.447381022 | -3.11343089  | 0.397542592 | 1           | BX119927.1 |
| ENSG00000228976 | 0           | 1.447381022 | -3.11343089  | 0.397542592 | 1           | SUMO2P8    |
| ENSG00000254526 | 0           | 1.447381022 | -3.11343089  | 0.397542592 | 1           | AC090791.1 |
| ENSG00000266401 | 0           | 1.447381022 | -3.11343089  | 0.397542592 | 1           | AP002478.1 |
| ENSG00000268287 | 0           | 1.447381022 | -3.11343089  | 0.397542592 | 1           | AC008687.3 |
| ENSG00000123933 | 4186.012001 | 3536.332993 | 0.243423118  | 0.397639732 | 0.523776758 | MXD4       |
| ENSG00000106125 | 24.086863   | 14.63577565 | 0.711921178  | 0.397642766 | 0.523776758 | MINDY4     |
| ENSG00000203943 | 11.59040692 | 17.0393756  | -0.561813734 | 0.397655846 | 0.523776758 | SAMD13     |
| ENSG00000243789 | 2.108131562 | 4.748276881 | -1.1647815   | 0.397870957 | 0.524033526 | JMJD7      |
| ENSG00000163956 | 2375.544199 | 2737.595625 | -0.204663436 | 0.397894894 | 0.524038487 | LRPAP1     |
| ENSG00000232531 | 8.148060944 | 12.10688084 | -0.573051354 | 0.398070714 | 0.524238925 | AC027612.3 |
| ENSG00000188010 | 199.4773391 | 229.0348927 | -0.199769139 | 0.398087439 | 0.524238925 | MORN2      |
| ENSG00000132740 | 387.7122458 | 439.0239537 | -0.178797239 | 0.39815516  | 0.524278438 | IGHMBP2    |
| ENSG00000267082 | 16.64731566 | 11.32054289 | 0.563299696  | 0.398168968 | 0.524278438 | AC011472.1 |
| ENSG00000111405 | 4.82412812  | 2.466247382 | 0.958016344  | 0.398177982 | 0.524278438 | ENDOU      |
| ENSG00000228950 | 1.525410814 | 0.387220594 | 1.979142152  | 0.398463034 | 1           | AC023137.1 |
| ENSG00000231424 | 4.310714408 | 1.406086955 | 1.605465688  | 0.398487527 | 0.524659425 | BX284613.2 |
| ENSG00000185163 | 544.9090543 | 625.5043812 | -0.198941984 | 0.398569648 | 0.524728082 | DDX51      |
| ENSG00000099910 | 474.8470303 | 547.8506162 | -0.205796418 | 0.398580066 | 0.524728082 | KLHL22     |
| ENSG00000265485 | 1.846374476 | 0.387220594 | 2.254050682  | 0.398737783 | 1           | LINC01915  |
| ENSG00000243944 | 1.846374476 | 0.387220594 | 2.254050682  | 0.398737783 | 1           | AC117386.2 |
| ENSG00000255655 | 1.846374476 | 0.387220594 | 2.254050682  | 0.398737783 | 1           | AC007570.1 |
| ENSG00000147010 | 2066.196952 | 1808.790329 | 0.192055029  | 0.398885851 | 0.525078418 | SH3KBP1    |
| ENSG00000095951 | 222.5835462 | 256.6713774 | -0.206365144 | 0.398886599 | 0.525078418 | HIVEP1     |
| novel.397       | 1.522903516 | 0.387220594 | 1.977210662  | 0.398949308 | 1           | -          |
| ENSG00000234183 | 1.522903516 | 0.387220594 | 1.977210662  | 0.398949308 | 1           | LINC01952  |
| ENSG00000179526 | 984.2110014 | 1129.961483 | -0.199228563 | 0.3989701   | 0.525161727 | SHARPIN    |
| ENSG00000267567 | 2.403879708 | 0.774441189 | 1.682080613  | 0.399010003 | 0.525187643 | AC008736.3 |
| ENSG00000228007 | 2.113146158 | 4.748276881 | -1.162391839 | 0.399058515 | 0.525202854 | AC011933.1 |
| ENSG00000010219 | 441.39602   | 386.2809061 | 0.19267883   | 0.399061989 | 0.525202854 | DYRK4      |
| ENSG00000279356 | 8.423679438 | 4.809640044 | 0.823369411  | 0.399230502 | 0.525398019 | AC007610.4 |

|                 |             |             |              |             |             |             |
|-----------------|-------------|-------------|--------------|-------------|-------------|-------------|
| ENSG00000277548 | 5.095985668 | 2.160459047 | 1.241222062  | 0.399273925 | 0.525428549 | AC018926.3  |
| ENSG00000230679 | 1.481319294 | 3.812127049 | -1.362847054 | 0.399344147 | 0.525487719 | ENO1-AS1    |
| ENSG00000146666 | 2.139615324 | 4.361056287 | -1.027956609 | 0.39935934  | 0.525487719 | LINC00525   |
| ENSG00000106635 | 850.4253951 | 764.9557479 | 0.152623706  | 0.399585895 | 0.525759199 | BCL7B       |
| ENSG00000196505 | 281.6155604 | 243.9834731 | 0.206437545  | 0.399606833 | 0.525760122 | GDAP2       |
| ENSG00000235627 | 0           | 1.682349583 | -3.337276525 | 0.399742432 | 1           | SNRPFP4     |
| ENSG00000274995 | 0           | 1.682349583 | -3.337276525 | 0.399742432 | 1           | AC013564.1  |
| ENSG00000259676 | 0           | 1.682349583 | -3.337276525 | 0.399742432 | 1           | AC103982.1  |
| ENSG00000265078 | 0           | 1.682349583 | -3.337276525 | 0.399742432 | 1           | RN7SL664P   |
| ENSG00000126733 | 0           | 1.682349583 | -3.337276525 | 0.399742432 | 1           | DACH2       |
| ENSG00000264978 | 0           | 1.682349583 | -3.337276525 | 0.399742432 | 1           | RN7SL630P   |
| ENSG00000275467 | 0           | 1.682349583 | -3.337276525 | 0.399742432 | 1           | AC083806.3  |
| ENSG00000270975 | 0           | 1.682349583 | -3.337276525 | 0.399742432 | 1           | MAGOH3P     |
| ENSG00000229028 | 0           | 1.682349583 | -3.337276525 | 0.399742432 | 1           | KRT223P     |
| ENSG00000265262 | 0           | 1.682349583 | -3.337276525 | 0.399742432 | 1           | TRMT112P3   |
| ENSG00000228510 | 1.832513069 | 3.943154111 | -1.110871433 | 0.399872056 | 0.526082433 | AL359091.2  |
| ENSG00000234648 | 5.206805656 | 9.781117126 | -0.911285612 | 0.399900944 | 0.526093798 | AL162151.2  |
| ENSG00000149499 | 1541.878    | 1351.009696 | 0.19079501   | 0.399939346 | 0.526117679 | EML3        |
| ENSG00000287593 | 1.541779519 | 4.382281258 | -1.510271289 | 0.39999762  | 0.526167697 | AL022724.2  |
| ENSG00000283442 | 1.525410814 | 0.356539013 | 1.979158319  | 0.400028999 | 1           | RF00015     |
| ENSG00000232739 | 0.615458159 | 2.200597239 | -1.841976835 | 0.400071223 | 0.526237135 | AL607028.1  |
| ENSG00000052802 | 1091.216658 | 1274.84107  | -0.224331735 | 0.400090917 | 0.526237135 | MSMO1       |
| ENSG00000165175 | 2005.640883 | 1788.778158 | 0.165196676  | 0.400131724 | 0.526264166 | MID11P1     |
| ENSG00000196741 | 36.48399575 | 46.73430449 | -0.3559045   | 0.400348757 | 0.526522959 | LINC01560   |
| ENSG00000227348 | 1.846374476 | 0.356539013 | 2.254071561  | 0.400364558 | 1           | MTND5P25    |
| ENSG00000231697 | 1.522903516 | 0.356539013 | 1.977223299  | 0.400518426 | 1           | NANOGP5     |
| ENSG00000233416 | 1.522903516 | 0.356539013 | 1.977223299  | 0.400518426 | 1           | AC012065.2  |
| ENSG00000248697 | 0.909952655 | 2.944356846 | -1.690035342 | 0.400522583 | 0.526724906 | TOX4P1      |
| ENSG00000072415 | 728.7004433 | 620.7349602 | 0.230969045  | 0.400658463 | 0.526876931 | MPP5        |
| ENSG00000285867 | 58.8952663  | 74.9289655  | -0.347061973 | 0.40075903  | 0.526977219 | BX470102.2  |
| ENSG00000141295 | 698.1276919 | 583.4176917 | 0.259474266  | 0.400775293 | 0.526977219 | SCRN2       |
| ENSG00000203668 | 535.3172133 | 430.992632  | 0.312313847  | 0.400860111 | 0.527062072 | CHML        |
| ENSG00000126705 | 688.7877488 | 568.9289835 | 0.276224928  | 0.401017728 | 0.527242628 | AHDC1       |
| ENSG00000277130 | 1.214547612 | 3.250145181 | -1.420156096 | 0.401091418 | 0.52731283  | AC073569.3  |
| ENSG00000268764 | 0.616711807 | 2.618499415 | -2.087620951 | 0.401138078 | 0.527320806 | AC011465.1  |
| ENSG00000283199 | 0.616711807 | 2.618499415 | -2.087620951 | 0.401138078 | 0.527320806 | C13orf46    |
| ENSG00000099917 | 2028.901692 | 2307.115508 | -0.185321023 | 0.401285988 | 0.527488553 | MED15       |
| ENSG00000103404 | 231.3254411 | 285.4477383 | -0.302833385 | 0.401364295 | 0.527549917 | USP31       |
| ENSG00000153944 | 616.5433412 | 497.7183964 | 0.309044107  | 0.401384738 | 0.527549917 | MSI2        |
| ENSG00000258122 | 0.894837599 | 2.476859868 | -1.464632642 | 0.401411341 | 0.527549917 | AC044802.2  |
| ENSG00000111615 | 564.7777167 | 638.6247342 | -0.177434542 | 0.401413891 | 0.527549917 | KRR1        |
| ENSG00000239801 | 1.846374476 | 0.336469917 | 2.25408529   | 0.40144184  | 1           | DENND6A-AS1 |
| ENSG00000287886 | 1.522903516 | 0.336469917 | 1.977231631  | 0.40156049  | 1           | AC005914.1  |
| ENSG00000259215 | 1.522903516 | 0.336469917 | 1.977231631  | 0.40156049  | 1           | AC027237.3  |
| ENSG00000111843 | 93.2842368  | 120.3689117 | -0.366824192 | 0.401596266 | 0.527762903 | TMEM14C     |
| ENSG00000181625 | 0.601596751 | 2.272572888 | -1.902403352 | 0.401756947 | 0.527947359 | SLX1B       |
| ENSG00000268458 | 3.936883685 | 1.00940975  | 1.940292683  | 0.401855962 | 0.528050767 | AC011468.3  |
| ENSG00000262693 | 3.068443981 | 0.672939833 | 2.160273992  | 0.402017644 | 0.528236504 | AC012146.3  |
| ENSG00000277287 | 22.55009808 | 13.41031056 | 0.745580777  | 0.402301047 | 0.528575809 | AL109976.1  |
| ENSG00000284820 | 1.802282956 | 3.852265241 | -1.100701728 | 0.402316563 | 0.528575809 | AC068946.2  |
| ENSG00000226851 | 1.847628125 | 0.387220594 | 2.25497091   | 0.402389446 | 1           | AC004112.1  |

|                 |             |             |              |             |             |            |
|-----------------|-------------|-------------|--------------|-------------|-------------|------------|
| ENSG00000148481 | 575.7179903 | 513.2345282 | 0.166018904  | 0.402392382 | 0.528638123 | MINDY3     |
| ENSG00000255986 | 3.911668168 | 1.854670712 | 1.098484433  | 0.402404686 | 0.528638123 | MT1JP      |
| ENSG00000277144 | 4.203655366 | 1.426156051 | 1.557129802  | 0.402472582 | 0.528700585 | AC092757.3 |
| ENSG00000268545 | 4.924918918 | 1.722487775 | 1.498626448  | 0.402550301 | 0.528756426 | VN1R107P   |
| ENSG00000167384 | 145.2378984 | 122.7248431 | 0.242797292  | 0.402555795 | 0.528756426 | ZNF180     |
| ENSG00000251609 | 0.307102255 | 2.323323566 | -2.828738802 | 0.40259943  | 1           | SETP12     |
| ENSG00000146352 | 0           | 1.456837632 | -3.122495001 | 0.402629371 | 1           | CLVS2      |
| ENSG00000269425 | 0           | 1.456837632 | -3.122495001 | 0.402629371 | 1           | AC104521.1 |
| ENSG00000235262 | 0           | 1.456837632 | -3.122495001 | 0.402629371 | 1           | KDM5C-IT1  |
| ENSG00000272076 | 0           | 1.456837632 | -3.122495001 | 0.402629371 | 1           | AC090186.1 |
| novel.932       | 0           | 1.456837632 | -3.122495001 | 0.402629371 | 1           | -          |
| ENSG00000145087 | 0           | 1.456837632 | -3.122495001 | 0.402629371 | 1           | STXBP5L    |
| ENSG00000248713 | 0           | 1.456837632 | -3.122495001 | 0.402629371 | 1           | C4orf54    |
| ENSG00000236509 | 0           | 1.456837632 | -3.122495001 | 0.402629371 | 1           | RPL21P133  |
| ENSG00000235802 | 0           | 1.456837632 | -3.122495001 | 0.402629371 | 1           | HCFC1-AS1  |
| ENSG00000242100 | 0           | 1.456837632 | -3.122495001 | 0.402629371 | 1           | RPL9P32    |
| ENSG00000213045 | 0           | 1.456837632 | -3.122495001 | 0.402629371 | 1           | AC097065.1 |
| ENSG00000279946 | 0           | 1.456837632 | -3.122495001 | 0.402629371 | 1           | AC244034.3 |
| ENSG00000199121 | 0           | 1.456837632 | -3.122495001 | 0.402629371 | 1           | MIR26B     |
| ENSG00000242241 | 0           | 1.456837632 | -3.122495001 | 0.402629371 | 1           | RN7SL306P  |
| ENSG00000273428 | 0           | 1.456837632 | -3.122495001 | 0.402629371 | 1           | AC004832.6 |
| ENSG00000255092 | 0.61420451  | 2.649180997 | -2.106910536 | 0.402727345 | 0.528943135 | AC010768.2 |
| ENSG00000103540 | 416.040374  | 367.0880408 | 0.181110896  | 0.402738659 | 0.528943135 | CCP110     |
| ENSG00000123989 | 4794.039257 | 5751.151732 | -0.262640703 | 0.402830953 | 0.529025714 | CHPF       |
| ENSG00000100319 | 212.9537391 | 241.76255   | -0.18270464  | 0.402842259 | 0.529025714 | ZMAT5      |
| ENSG00000166200 | 1469.253351 | 1655.448208 | -0.172252508 | 0.402906561 | 0.529083415 | COPS2      |
| ENSG00000287351 | 0.586481695 | 2.557136252 | -2.108153765 | 0.402955738 | 0.529121249 | AC092120.3 |
| ENSG00000250961 | 9.530199094 | 4.250098321 | 1.160177311  | 0.403125848 | 0.529317869 | AC025470.2 |
| ENSG00000256232 | 0.925067711 | 2.965581817 | -1.681982438 | 0.40321343  | 0.529406111 | LINC02387  |
| novel.871       | 3.622188266 | 7.288940057 | -1.014837228 | 0.403422341 | 0.529653638 | -          |
| ENSG00000230074 | 71.70440905 | 86.64387384 | -0.273442156 | 0.403455288 | 0.529670128 | AL162231.2 |
| ENSG00000153896 | 171.7923206 | 145.3479959 | 0.242120896  | 0.40364003  | 0.52986924  | ZNF599     |
| ENSG00000259771 | 2.421502061 | 0.693008929 | 1.784272225  | 0.403648645 | 0.52986924  | AC092756.1 |
| ENSG00000199179 | 0.616711807 | 2.649180997 | -2.102747493 | 0.403688532 | 0.52986924  | MIRLET7I   |
| ENSG00000265313 | 0.616711807 | 2.649180997 | -2.102747493 | 0.403688532 | 0.52986924  | LINC01476  |
| ENSG00000238045 | 35.29068925 | 47.17124828 | -0.41730141  | 0.403760856 | 0.529908555 | AC009133.1 |
| ENSG00000105650 | 1.480065645 | 3.658590747 | -1.289711646 | 0.403767506 | 0.529908555 | AC005759.1 |
| ENSG00000110442 | 712.5246435 | 626.8093992 | 0.18452342   | 0.403779672 | 0.529908555 | COMMD9     |
| ENSG00000067606 | 31.55545808 | 19.37344005 | 0.699834787  | 0.403869302 | 0.529999411 | PRKCZ      |
| ENSG00000235082 | 4.26536924  | 7.33725059  | -0.777478042 | 0.403909361 | 0.530011624 | SUMO1P3    |
| ENSG00000171206 | 3283.554895 | 2741.845694 | 0.260228703  | 0.403919408 | 0.530011624 | TRIM8      |
| ENSG00000213152 | 1.847628125 | 0.356539013 | 2.254991906  | 0.403989915 | 1           | RPL7AP60   |
| ENSG00000234500 | 24.41144542 | 17.86456747 | 0.449845453  | 0.403989988 | 0.530077465 | AC008267.3 |
| ENSG00000111671 | 284.6913414 | 205.5463282 | 0.468975189  | 0.404095408 | 0.53018901  | SPSB2      |
| ENSG00000135248 | 2.72484337  | 1.060160428 | 1.35227013   | 0.404183541 | 0.530277867 | FAM71F1    |
| ENSG00000068784 | 295.8402626 | 345.4689507 | -0.224502529 | 0.404217875 | 0.530296133 | SRBD1      |
| ENSG00000160360 | 1675.814049 | 1982.961096 | -0.242718366 | 0.404254257 | 0.530317085 | GPSM1      |
| ENSG00000062725 | 952.5438549 | 842.9745966 | 0.176198425  | 0.404372439 | 0.530445337 | APPBP2     |
| ENSG00000240720 | 1.845120827 | 0.356539013 | 2.253247758  | 0.404402503 | 1           | LRRD1      |
| ENSG00000275612 | 1.845120827 | 0.356539013 | 2.253247758  | 0.404402503 | 1           | AC104237.2 |
| ENSG00000255165 | 1.845120827 | 0.356539013 | 2.253247758  | 0.404402503 | 1           | AC134775.1 |

|                 |             |             |              |             |             |            |
|-----------------|-------------|-------------|--------------|-------------|-------------|------------|
| ENSG00000235420 | 1.845120827 | 0.356539013 | 2.253247758  | 0.404402503 | 1           | RPL29P30   |
| ENSG00000184786 | 1.495180701 | 0.387220594 | 1.955545116  | 0.404420873 | 1           | TCTE3      |
| ENSG00000242110 | 46.08335934 | 33.83419764 | 0.445299975  | 0.404487533 | 0.530569525 | AMACR      |
| ENSG00000207399 | 5.434571684 | 2.375358513 | 1.171053771  | 0.404533246 | 0.530602699 | RNU6-1011P |
| ENSG00000251333 | 20.57026667 | 14.63564726 | 0.489262543  | 0.404662026 | 0.530744818 | RTN3P1     |
| ENSG00000231201 | 0.616711807 | 2.587817834 | -2.07242006  | 0.404833338 | 0.530942703 | AF127577.2 |
| ENSG00000179886 | 10.55444795 | 6.64424166  | 0.681642296  | 0.404919266 | 0.531028593 | TIGD5      |
| ENSG00000121270 | 3.067190332 | 1.060160428 | 1.522244689  | 0.405064697 | 0.531192505 | ABCC11     |
| ENSG00000267940 | 13.10793983 | 7.683177117 | 0.779170974  | 0.405151763 | 0.531279865 | AC022762.2 |
| ENSG00000165195 | 188.0193215 | 226.6308604 | -0.268519763 | 0.405179375 | 0.531289257 | PIGA       |
| ENSG00000249855 | 7.547717841 | 11.74905755 | -0.629719182 | 0.405274296 | 0.531386903 | EEF1A1P19  |
| ENSG00000279641 | 4.777529303 | 8.742181669 | -0.863712928 | 0.405323834 | 0.531425037 | AC120057.3 |
| ENSG00000251271 | 0.616711807 | 2.71182843  | -2.151559836 | 0.405395901 | 0.531492704 | ALG1L7P    |
| ENSG00000171503 | 403.1915848 | 334.0356988 | 0.270789801  | 0.405458711 | 0.531548227 | ETFDH      |
| ENSG00000205643 | 179.9708686 | 210.0497007 | -0.222263063 | 0.405483499 | 0.531553902 | CDPF1      |
| ENSG00000260381 | 1.804790254 | 0.387220594 | 2.224819966  | 0.405642923 | 1           | AC007610.2 |
| ENSG00000165533 | 442.2161922 | 371.5641306 | 0.250715143  | 0.405648671 | 0.531743598 | TTC8       |
| ENSG00000160813 | 276.3029212 | 317.6146127 | -0.20058203  | 0.405755282 | 0.531856515 | PPP1R35    |
| ENSG00000163357 | 5.069516502 | 2.120320855 | 1.254319668  | 0.405793565 | 0.531879861 | DCST1      |
| ENSG00000271607 | 2.710981963 | 1.060160428 | 1.346464957  | 0.405907295 | 0.531989727 | Z84480.1   |
| ENSG00000203327 | 5.495031908 | 9.640505059 | -0.805487935 | 0.405918339 | 0.531989727 | AC012358.1 |
| ENSG00000260584 | 1.495180701 | 0.356539013 | 1.955518165  | 0.406025304 | 1           | AC142381.2 |
| ENSG00000231128 | 1.495180701 | 0.356539013 | 1.955518165  | 0.406025304 | 1           | AL137856.1 |
| ENSG00000235271 | 1.801029308 | 0.387220594 | 2.222167671  | 0.406274037 | 1           | Z97353.2   |
| ENSG00000138395 | 42.77231901 | 77.35819116 | -0.854834726 | 0.4062921   | 0.532430551 | CDK15      |
| ENSG00000143416 | 413.5238609 | 290.3736493 | 0.510028504  | 0.406295682 | 0.532430551 | SELENBP1   |
| ENSG00000175482 | 269.3167543 | 319.7507175 | -0.246739794 | 0.406404335 | 0.532546075 | POLD4      |
| ENSG00000022277 | 1706.684194 | 1523.858728 | 0.163351018  | 0.406487027 | 0.53262757  | RTF2       |
| ENSG00000255815 | 3.284855899 | 1.069617038 | 1.616907812  | 0.406745988 | 0.532934051 | KRT8P11    |
| ENSG00000230105 | 2.446717578 | 0.774441189 | 1.701460205  | 0.40676195  | 0.532934051 | AL354793.1 |
| ENSG00000242767 | 1.495180701 | 0.336469917 | 1.955500391  | 0.407090952 | 1           | ZBTB20-AS4 |
| ENSG00000230305 | 1.495180701 | 0.336469917 | 1.955500391  | 0.407090952 | 1           | AC004980.3 |
| ENSG00000254662 | 1.495180701 | 0.336469917 | 1.955500391  | 0.407090952 | 1           | AP000781.1 |
| ENSG00000258910 | 7.234276071 | 3.271370153 | 1.149779265  | 0.407154553 | 0.533421534 | LINC01956  |
| ENSG00000100299 | 960.2262262 | 1088.6996   | -0.180953554 | 0.407261124 | 0.53353425  | ARSA       |
| ENSG00000143882 | 34.13269837 | 25.75434331 | 0.405842806  | 0.407288882 | 0.533543712 | ATP6V1C2   |
| novel.326       | 1.804790254 | 0.356539013 | 2.224811205  | 0.407312    | 1           | -          |
| ENSG00000256222 | 1.804790254 | 0.356539013 | 2.224811205  | 0.407312    | 1           | MTRNR2L3   |
| ENSG00000255468 | 23.225803   | 15.78682495 | 0.550810302  | 0.407332053 | 0.533573362 | AP001107.9 |
| ENSG00000196284 | 204.0926207 | 173.1862463 | 0.237547289  | 0.407388295 | 0.53362013  | SUPT3H     |
| ENSG00000171160 | 243.761251  | 276.0173467 | -0.179534033 | 0.407422933 | 0.533638597 | MORN4      |
| ENSG00000275496 | 6.043690327 | 13.15386024 | -1.117474966 | 0.407491213 | 0.533701124 | CU633906.1 |
| ENSG00000176155 | 655.7220697 | 816.3496453 | -0.315764627 | 0.407535734 | 0.533732528 | CCDC57     |
| ENSG00000102181 | 2704.023907 | 2460.373348 | 0.136196737  | 0.407767866 | 0.534009624 | CD99L2     |
| ENSG00000214700 | 0.601596751 | 2.079026788 | -1.794877343 | 0.407770767 | 1           | C12orf71   |
| ENSG00000234604 | 0.601596751 | 2.079026788 | -1.794877343 | 0.407770767 | 1           | AL021068.1 |
| ENSG00000139182 | 620.3479788 | 509.1710067 | 0.284790358  | 0.407851882 | 0.534092729 | CLSTN3     |
| ENSG00000211513 | 2.11063886  | 4.381125383 | -1.046139596 | 0.407899707 | 0.534128435 | MIR320E    |
| ENSG00000260075 | 10.79482174 | 4.941822981 | 1.140723621  | 0.40793869  | 0.534152561 | NSFP1      |
| ENSG00000274775 | 1.801029308 | 0.356539013 | 2.222155946  | 0.407947035 | 1           | Z82195.2   |
| ENSG00000058272 | 1224.930322 | 1382.614892 | -0.174842611 | 0.408023116 | 0.534236183 | PPP1R12A   |

|                 |             |             |              |             |             |             |
|-----------------|-------------|-------------|--------------|-------------|-------------|-------------|
| ENSG00000259883 | 4.428842826 | 1.406086955 | 1.650186912  | 0.40836185  | 0.534636645 | EHD4-AS1    |
| ENSG00000115548 | 1241.033341 | 1005.189879 | 0.30437136   | 0.408370125 | 0.534636645 | KDM3A       |
| ENSG00000250057 | 1.804790254 | 0.336469917 | 2.224805441  | 0.40841742  | 1           | AC114781.2  |
| ENSG00000203499 | 1.804790254 | 0.336469917 | 2.224805441  | 0.40841742  | 1           | IQANK1      |
| ENSG00000271788 | 5.802134163 | 9.324232633 | -0.688474751 | 0.408570971 | 0.534872639 | AC008875.1  |
| ENSG00000269755 | 2.654282684 | 0.743759607 | 1.857166282  | 0.408664316 | 0.534967884 | AC008758.6  |
| ENSG00000196510 | 775.0346641 | 924.5944705 | -0.254718313 | 0.40879621  | 0.53511358  | ANAPC7      |
| ENSG00000230695 | 2.140868972 | 4.453101031 | -1.050518089 | 0.408850271 | 0.535157383 | AC012462.3  |
| ENSG00000277715 | 12.92559025 | 18.45723092 | -0.51483068  | 0.40889518  | 0.535189203 | AC079174.2  |
| ENSG00000226266 | 8.854209439 | 4.514592589 | 0.959099493  | 0.408916175 | 0.535189721 | AC009961.1  |
| ENSG00000249774 | 1.801029308 | 0.336469917 | 2.222148234  | 0.409055063 | 1           | AC025458.1  |
| ENSG00000249599 | 1.801029308 | 0.336469917 | 2.222148234  | 0.409055063 | 1           | BMPR1B-DT   |
| ENSG00000272834 | 1.801029308 | 0.336469917 | 2.222148234  | 0.409055063 | 1           | AL022238.3  |
| ENSG00000248356 | 1.801029308 | 0.336469917 | 2.222148234  | 0.409055063 | 1           | AC093864.1  |
| ENSG00000240135 | 1.801029308 | 0.336469917 | 2.222148234  | 0.409055063 | 1           | PSMD12P     |
| ENSG00000099331 | 3296.150926 | 2830.95724  | 0.219601264  | 0.409087305 | 0.535386725 | MYO9B       |
| ENSG00000163704 | 128.8095729 | 158.5587242 | -0.298772935 | 0.409198143 | 0.535504808 | PRRT3       |
| ENSG00000230002 | 11.53746859 | 7.358603955 | 0.636999182  | 0.409252455 | 0.535548909 | ALMS1-IT1   |
| ENSG00000221520 | 3.001715513 | 0.774441189 | 1.988310003  | 0.409396484 | 0.535710403 | MIR1285-1   |
| ENSG00000272627 | 1.814890715 | 0.356539013 | 2.231974689  | 0.409446773 | 1           | AC016542.1  |
| ENSG00000124275 | 573.4282208 | 504.5570958 | 0.184080908  | 0.409458051 | 0.535763981 | MTRR        |
| ENSG00000269646 | 2.742465724 | 1.049547942 | 1.366950162  | 0.409516423 | 0.535813375 | AC010487.2  |
| ENSG00000258982 | 2.697120555 | 1.029478846 | 1.363328591  | 0.409661375 | 0.535954535 | AL133523.1  |
| ENSG00000267793 | 4.28675254  | 1.386017859 | 1.614218288  | 0.409665567 | 0.535954535 | AC009977.1  |
| ENSG00000207276 | 2.138361675 | 0.743759607 | 1.545278505  | 0.409751491 | 0.536019446 | RNU6-1160P  |
| ENSG00000237758 | 7.28094616  | 11.04787628 | -0.60503544  | 0.409756445 | 0.536019446 | BANF1P3     |
| ENSG00000267724 | 5.440839927 | 2.618499415 | 1.073665577  | 0.409841478 | 0.536094011 | AC012254.3  |
| ENSG00000157450 | 455.7304154 | 533.9237615 | -0.228365364 | 0.409854715 | 0.536094011 | RNF111      |
| ENSG00000154917 | 113.1236376 | 84.98938051 | 0.414166769  | 0.409891688 | 0.536115382 | RAB6B       |
| ENSG00000185198 | 2.436617117 | 0.693008929 | 1.792706026  | 0.410060146 | 0.536308717 | PRSS57      |
| ENSG00000184209 | 432.856862  | 375.7454641 | 0.204127114  | 0.410236276 | 0.536512066 | SNRNP35     |
| ENSG00000214814 | 2.450478525 | 5.003314538 | -1.036338075 | 0.410317764 | 0.536591625 | FER1L6      |
| ENSG00000241593 | 4.196062203 | 1.161661783 | 1.878769274  | 0.410351958 | 0.536609333 | AC099542.1  |
| ENSG00000260884 | 17.4287547  | 11.08570273 | 0.652642964  | 0.410397159 | 0.536616591 | AC009120.3  |
| ENSG00000277245 | 4.778782952 | 2.171071533 | 1.145524828  | 0.410398817 | 0.536616591 | AC084782.3  |
| ENSG00000140307 | 1065.080041 | 1229.78182  | -0.207661418 | 0.410479195 | 0.536694679 | GTF2A2      |
| ENSG00000206924 | 1.814890715 | 0.336469917 | 2.231973827  | 0.410528016 | 1           | RNU6-689P   |
| ENSG00000271181 | 1.814890715 | 0.336469917 | 2.231973827  | 0.410528016 | 1           | Z99916.2    |
| ENSG00000199753 | 34.47260931 | 27.27023236 | 0.338354319  | 0.410646444 | 0.536886335 | SNORD104    |
| ENSG00000124212 | 488.2527191 | 169.4637836 | 1.526432493  | 0.410706313 | 0.53693759  | PTGIS       |
| ENSG00000089050 | 394.4767293 | 343.9718464 | 0.197006858  | 0.410738816 | 0.536953063 | RBBP9       |
| ENSG00000287236 | 5.322426776 | 2.099095884 | 1.335985     | 0.410774969 | 0.536973307 | Z73420.1    |
| ENSG00000149474 | 288.6656634 | 245.157464  | 0.234489141  | 0.410821406 | 0.53700699  | KAT14       |
| novel.1034      | 1406.077812 | 478.3920052 | 1.555449276  | 0.410862483 | 0.53701064  | -           |
| ENSG00000237748 | 6.133198287 | 2.813329785 | 1.114534362  | 0.410865537 | 0.53701064  | UQCRBP1     |
| ENSG00000106346 | 364.0829949 | 320.3103061 | 0.184913942  | 0.410949454 | 0.537093303 | USP42       |
| ENSG00000198169 | 15.75498536 | 10.51901614 | 0.573478325  | 0.410983454 | 0.537110721 | ZNF251      |
| ENSG00000271334 | 2.771442187 | 5.727005049 | -1.054222853 | 0.411037331 | 0.537154111 | LINC02104   |
| ENSG00000252269 | 0           | 1.386017859 | -3.056478568 | 0.411118833 | 1           | RNU4ATAC12P |
| ENSG00000273786 | 0           | 1.386017859 | -3.056478568 | 0.411118833 | 1           | AC020658.4  |
| ENSG00000158525 | 0           | 1.386017859 | -3.056478568 | 0.411118833 | 1           | CPA5        |



|                 |             |             |              |             |             |             |
|-----------------|-------------|-------------|--------------|-------------|-------------|-------------|
| ENSG00000249641 | 0           | 1.386017859 | -3.056478568 | 0.411118833 | 1           | HOXC13-AS   |
| ENSG00000226876 | 0           | 1.386017859 | -3.056478568 | 0.411118833 | 1           | AC092801.1  |
| ENSG00000224017 | 0           | 1.386017859 | -3.056478568 | 0.411118833 | 1           | LINC01449   |
| ENSG00000236480 | 0           | 1.386017859 | -3.056478568 | 0.411118833 | 1           | PKMP1       |
| ENSG00000273975 | 0           | 1.386017859 | -3.056478568 | 0.411118833 | 1           | RF00017     |
| ENSG00000189229 | 0           | 1.386017859 | -3.056478568 | 0.411118833 | 1           | AC069277.1  |
| ENSG00000250538 | 0           | 1.386017859 | -3.056478568 | 0.411118833 | 1           | AC104407.1  |
| ENSG00000288071 | 0           | 1.386017859 | -3.056478568 | 0.411118833 | 1           | AL591135.2  |
| ENSG00000272428 | 0           | 1.386017859 | -3.056478568 | 0.411118833 | 1           | AL450270.1  |
| ENSG00000177359 | 0           | 1.386017859 | -3.056478568 | 0.411118833 | 1           | AC024940.2  |
| ENSG00000270490 | 0           | 1.386017859 | -3.056478568 | 0.411118833 | 1           | AC110048.1  |
| ENSG00000268058 | 0           | 1.386017859 | -3.056478568 | 0.411118833 | 1           | BNIP3P40    |
| ENSG00000100596 | 904.0549899 | 1034.475069 | -0.194570124 | 0.411235282 | 0.537385769 | SPTLC2      |
| ENSG00000135069 | 894.5658048 | 1240.698976 | -0.472088361 | 0.411258595 | 0.537389204 | PSAT1       |
| ENSG00000255458 | 17.34809356 | 10.57806756 | 0.710652433  | 0.411293971 | 0.537408401 | AC108471.2  |
| novel.325       | 6.684364003 | 3.862877727 | 0.7777561    | 0.41188048  | 0.538147686 | -           |
| ENSG00000232742 | 14.2522115  | 9.160083845 | 0.644708688  | 0.411967605 | 0.538234454 | RHOQP2      |
| ENSG00000286358 | 2.128261214 | 5.820334064 | -1.458497975 | 0.412015423 | 0.53826986  | AC096647.1  |
| ENSG00000255239 | 1.789675198 | 0.387220594 | 2.21403357   | 0.412074529 | 1           | TREHP1      |
| ENSG00000164828 | 3037.125254 | 2621.46461  | 0.212330711  | 0.412115402 | 0.538347165 | SUN1        |
| ENSG00000160783 | 319.8009492 | 276.1963463 | 0.211737977  | 0.412116037 | 0.538347165 | PMF1        |
| ENSG00000228451 | 38.31016931 | 53.51992891 | -0.47955638  | 0.412215873 | 0.538450507 | SDAD1P1     |
| ENSG00000258651 | 5.753028049 | 2.833398881 | 1.015880393  | 0.412275872 | 0.538501806 | SEC23A-AS1  |
| ENSG00000267016 | 0.907445357 | 2.913675265 | -1.679980706 | 0.412540943 | 0.53878048  | AC111170.1  |
| ENSG00000273261 | 8.451402252 | 4.932494765 | 0.769025194  | 0.412546422 | 0.53878048  | AC092953.2  |
| ENSG00000165097 | 389.4489392 | 328.9022903 | 0.24300125   | 0.412554233 | 0.53878048  | KDM1B       |
| ENSG00000254810 | 4.269130186 | 1.762625967 | 1.265778389  | 0.412588545 | 0.53878048  | AP001189.3  |
| ENSG00000273568 | 12.04962865 | 16.93774585 | -0.487585054 | 0.412592911 | 0.53878048  | AC131009.3  |
| ENSG00000128573 | 48.56979494 | 23.10529071 | 1.070125     | 0.412615909 | 0.538783432 | FOXP2       |
| ENSG00000245148 | 9.691094111 | 14.02175884 | -0.532537927 | 0.412742066 | 0.538921078 | ARAP1-AS2   |
| ENSG00000168286 | 544.5030839 | 480.9310364 | 0.179360563  | 0.4127981   | 0.538938562 | THAP11      |
| ENSG00000163467 | 4.558610087 | 7.449492825 | -0.715261648 | 0.412802457 | 0.538938562 | TSACC       |
| ENSG00000065833 | 989.3978861 | 710.9387366 | 0.476840727  | 0.412817687 | 0.538938562 | ME1         |
| ENSG00000197191 | 19.03600904 | 12.81983047 | 0.577434188  | 0.412879336 | 0.538991963 | CYSRT1      |
| ENSG00000280206 | 13.08057303 | 23.70869504 | -0.862297269 | 0.412933116 | 0.539035084 | AC026401.3  |
| ENSG00000231822 | 17.9386922  | 24.38852295 | -0.449136664 | 0.412962715 | 0.539046638 | AC019097.1  |
| ENSG00000116183 | 10.03978059 | 16.24846134 | -0.702676332 | 0.41309406  | 0.539190996 | PAPPA2      |
| ENSG00000086065 | 1467.159163 | 1707.297334 | -0.218705825 | 0.413127287 | 0.539207277 | CHMP5       |
| ENSG00000225945 | 3.575589449 | 1.447381022 | 1.313084832  | 0.41324544  | 0.539334393 | AL121574.1  |
| ENSG00000286555 | 9.907506029 | 14.8670198  | -0.579606627 | 0.413405135 | 0.539515712 | AP003065.2  |
| ENSG00000279611 | 16.17513017 | 10.13051128 | 0.679445935  | 0.413475155 | 0.539535808 | AC012313.10 |
| ENSG00000096070 | 709.0126797 | 858.3441017 | -0.275524712 | 0.413482535 | 0.539535808 | BRPF3       |
| ENSG00000067221 | 526.9527238 | 413.5156023 | 0.349056927  | 0.413482832 | 0.539535808 | STOML1      |
| ENSG00000228205 | 5.787019107 | 9.599210992 | -0.723829074 | 0.413569922 | 0.539622345 | AC131235.1  |
| ENSG00000280179 | 0           | 1.406086955 | -3.075465715 | 0.413627212 | 1           | CU639417.5  |
| ENSG00000236307 | 0           | 1.406086955 | -3.075465715 | 0.413627212 | 1           | EEF1E1P1    |
| ENSG00000148584 | 0           | 1.406086955 | -3.075465715 | 0.413627212 | 1           | A1CF        |
| ENSG00000109205 | 0           | 1.406086955 | -3.075465715 | 0.413627212 | 1           | ODAM        |
| ENSG00000229154 | 0           | 1.406086955 | -3.075465715 | 0.413627212 | 1           | KCNQ5-AS1   |
| ENSG00000237263 | 0           | 1.406086955 | -3.075465715 | 0.413627212 | 1           | MAPK6P3     |
| ENSG00000227528 | 0           | 1.406086955 | -3.075465715 | 0.413627212 | 1           | DIAPH3-AS1  |

|                 |             |             |              |             |             |            |
|-----------------|-------------|-------------|--------------|-------------|-------------|------------|
| ENSG00000267409 | 0           | 1.406086955 | -3.075465715 | 0.413627212 | 1           | AC068473.4 |
| ENSG00000231961 | 0           | 1.406086955 | -3.075465715 | 0.413627212 | 1           | AL035461.1 |
| ENSG00000266533 | 0           | 1.406086955 | -3.075465715 | 0.413627212 | 1           | MIR3619    |
| ENSG00000168676 | 7.496033158 | 3.882946823 | 0.944373787  | 0.413636885 | 0.539682615 | KCTD19     |
| ENSG00000138079 | 1.789675198 | 0.356539013 | 2.214013824  | 0.413732437 | 1           | SLC3A1     |
| ENSG00000279965 | 1.789675198 | 0.356539013 | 2.214013824  | 0.413732437 | 1           | AL390755.2 |
| ENSG00000258210 | 3.591958154 | 1.518200796 | 1.274344904  | 0.413935412 | 0.540044991 | AC144548.1 |
| ENSG00000155026 | 3.31633966  | 1.10029862  | 1.6017578    | 0.414021195 | 0.540129785 | RSPH10B    |
| ENSG00000154122 | 2398.505555 | 1732.672191 | 0.469020475  | 0.414128533 | 0.54024269  | ANKH       |
| ENSG00000182795 | 1.7871679   | 0.356539013 | 2.212228839  | 0.414160542 | 1           | C1orf116   |
| ENSG00000254495 | 1.7871679   | 0.356539013 | 2.212228839  | 0.414160542 | 1           | AP000487.2 |
| ENSG00000184831 | 275.6358344 | 221.9801977 | 0.311475798  | 0.414245816 | 0.540368556 | APOO       |
| ENSG00000151116 | 443.9688427 | 508.5347843 | -0.196490485 | 0.414274911 | 0.540379379 | UEVLD      |
| ENSG00000277998 | 6.623903779 | 10.69950961 | -0.681359396 | 0.414322088 | 0.540404543 | AC107075.1 |
| ENSG00000248971 | 7.030543183 | 3.270214277 | 1.106432655  | 0.414335803 | 0.540404543 | KRT8P46    |
| ENSG00000286485 | 3.029438327 | 6.370419176 | -1.075305655 | 0.41436951  | 0.540421376 | Z80897.1   |
| ENSG00000134748 | 823.6467108 | 739.4824191 | 0.155282413  | 0.414685652 | 0.540802652 | PRPF38A    |
| ENSG00000170471 | 1111.794176 | 1248.574198 | -0.167178892 | 0.414713622 | 0.540802652 | RALGAPB    |
| ENSG00000122420 | 120.5641536 | 168.0949026 | -0.479156663 | 0.4147243   | 0.540802652 | PTGFR      |
| ENSG00000215256 | 10.79732903 | 6.307771744 | 0.78886459   | 0.414757273 | 0.540818505 | DHRS4-AS1  |
| ENSG00000286755 | 3.225649323 | 0.723690511 | 2.1626076    | 0.414784283 | 0.540826582 | AC135893.1 |
| ENSG00000230815 | 1.789675198 | 0.336469917 | 2.214000833  | 0.414830544 | 1           | AL807757.1 |
| ENSG00000101596 | 1080.477181 | 1216.102575 | -0.170704329 | 0.414854109 | 0.540890481 | SMCHD1     |
| ENSG00000268696 | 1.850135422 | 0           | 3.220118962  | 0.414966176 | 1           | ZNF723     |
| ENSG00000286122 | 1.850135422 | 0           | 3.220118962  | 0.414966176 | 1           | AC016074.2 |
| ENSG00000255746 | 1.850135422 | 0           | 3.220118962  | 0.414966176 | 1           | AC007406.2 |
| ENSG00000235111 | 1.850135422 | 0           | 3.220118962  | 0.414966176 | 1           | Z97192.3   |
| ENSG00000258653 | 1.850135422 | 0           | 3.220118962  | 0.414966176 | 1           | AC005520.1 |
| ENSG00000287509 | 1.850135422 | 0           | 3.220118962  | 0.414966176 | 1           | AP001033.3 |
| ENSG00000211941 | 1.850135422 | 0           | 3.220118962  | 0.414966176 | 1           | IGHV3-11   |
| ENSG00000264175 | 1.850135422 | 0           | 3.220118962  | 0.414966176 | 1           | MIR3189    |
| ENSG00000211792 | 1.850135422 | 0           | 3.220118962  | 0.414966176 | 1           | TRAV14DV4  |
| ENSG00000211900 | 1.850135422 | 0           | 3.220118962  | 0.414966176 | 1           | IGHJ6      |
| ENSG00000228528 | 1.850135422 | 0           | 3.220118962  | 0.414966176 | 1           | AC068057.1 |
| ENSG00000255860 | 1.850135422 | 0           | 3.220118962  | 0.414966176 | 1           | AP000812.2 |
| ENSG00000287150 | 1.850135422 | 0           | 3.220118962  | 0.414966176 | 1           | AL139340.1 |
| ENSG00000285714 | 1.850135422 | 0           | 3.220118962  | 0.414966176 | 1           | AL159158.1 |
| ENSG00000211816 | 1.850135422 | 0           | 3.220118962  | 0.414966176 | 1           | TRAV38-1   |
| ENSG00000214943 | 1.850135422 | 0           | 3.220118962  | 0.414966176 | 1           | GPR33      |
| ENSG00000240122 | 1.850135422 | 0           | 3.220118962  | 0.414966176 | 1           | FABP5P11   |
| ENSG00000276932 | 1.850135422 | 0           | 3.220118962  | 0.414966176 | 1           | RF00019    |
| ENSG00000259656 | 0.600343103 | 2.058957692 | -1.785013444 | 0.415113315 | 1           | AC013452.2 |
| ENSG00000172969 | 0.600343103 | 2.058957692 | -1.785013444 | 0.415113315 | 1           | FRG2C      |
| ENSG00000279711 | 0.600343103 | 2.058957692 | -1.785013444 | 0.415113315 | 1           | AP004782.1 |
| ENSG00000134258 | 1.539272221 | 0           | 2.954375821  | 0.415119706 | 1           | VTCN1      |
| ENSG00000213973 | 1.539272221 | 0           | 2.954375821  | 0.415119706 | 1           | ZNF99      |
| ENSG00000236180 | 1.539272221 | 0           | 2.954375821  | 0.415119706 | 1           | AL445669.2 |
| ENSG00000267046 | 1.539272221 | 0           | 2.954375821  | 0.415119706 | 1           | E2F3P1     |
| ENSG00000095777 | 1.539272221 | 0           | 2.954375821  | 0.415119706 | 1           | MYO3A      |
| ENSG00000234255 | 1.539272221 | 0           | 2.954375821  | 0.415119706 | 1           | AC012370.2 |
| ENSG00000259907 | 1.539272221 | 0           | 2.954375821  | 0.415119706 | 1           | AC004817.2 |

|                 |             |             |              |             |              |            |
|-----------------|-------------|-------------|--------------|-------------|--------------|------------|
| ENSG00000231485 | 1.539272221 | 0           | 2.954375821  | 0.415119706 | 1            | AL357078.1 |
| ENSG00000254447 | 1.539272221 | 0           | 2.954375821  | 0.415119706 | 1            | OR7E11P    |
| ENSG00000205955 | 1.539272221 | 0           | 2.954375821  | 0.415119706 | 1            | HSP90AA5P  |
| ENSG00000249959 | 1.539272221 | 0           | 2.954375821  | 0.415119706 | 1            | AC024587.2 |
| ENSG00000183318 | 1.539272221 | 0           | 2.954375821  | 0.415119706 | 1            | SPDYE4     |
| ENSG00000227588 | 1.539272221 | 0           | 2.954375821  | 0.415119706 | 1            | CNTN4-AS2  |
| ENSG00000251300 | 1.539272221 | 0           | 2.954375821  | 0.415119706 | 1            | AC104596.2 |
| ENSG00000285849 | 1.539272221 | 0           | 2.954375821  | 0.415119706 | 1            | AL021918.4 |
| ENSG00000274979 | 1.539272221 | 0           | 2.954375821  | 0.415119706 | 1            | AC020656.2 |
| ENSG00000256967 | 18.44952735 | 25.74141908 | -0.481266673 | 0.415202056 | 0.5413316972 | AC018653.3 |
| ENSG00000264235 | 8.549614482 | 5.095359283 | 0.750916598  | 0.415233701 | 0.541331065  | AP005329.1 |
| ENSG00000279206 | 1.7871679   | 0.336469917 | 2.212214543  | 0.415260355 | 1            | AC004943.3 |
| ENSG00000231441 | 7.610756634 | 3.923085015 | 0.952385691  | 0.415289751 | 0.541337528  | AL512422.1 |
| ENSG00000206992 | 0.600343103 | 1.854670712 | -1.609654558 | 0.415297951 | 1            | RNU6-574P  |
| ENSG00000158109 | 1194.231632 | 1041.788106 | 0.196821963  | 0.415311996 | 0.541337528  | TPRG1L     |
| ENSG00000277200 | 3.068443981 | 0.713078025 | 2.100408256  | 0.415322002 | 0.541337528  | AC005696.4 |
| ENSG00000205810 | 3.068443981 | 0.713078025 | 2.100408256  | 0.415322002 | 0.541337528  | KLRC3      |
| novel.76        | 1.538018572 | 0           | 2.953280223  | 0.415379458 | 1            | -          |
| ENSG00000211648 | 1.538018572 | 0           | 2.953280223  | 0.415379458 | 1            | IGLV1-47   |
| ENSG00000256407 | 1.538018572 | 0           | 2.953280223  | 0.415379458 | 1            | AL357673.1 |
| ENSG00000248506 | 1.538018572 | 0           | 2.953280223  | 0.415379458 | 1            | AC097474.1 |
| ENSG00000251557 | 1.538018572 | 0           | 2.953280223  | 0.415379458 | 1            | HNRNPKP3   |
| ENSG00000276524 | 1.538018572 | 0           | 2.953280223  | 0.415379458 | 1            | AC010999.2 |
| ENSG00000134612 | 1.538018572 | 0           | 2.953280223  | 0.415379458 | 1            | FOLH1B     |
| ENSG00000243066 | 1.538018572 | 0           | 2.953280223  | 0.415379458 | 1            | RN7SL842P  |
| ENSG00000188910 | 1.538018572 | 0           | 2.953280223  | 0.415379458 | 1            | GJB3       |
| ENSG00000170367 | 1.538018572 | 0           | 2.953280223  | 0.415379458 | 1            | CST5       |
| ENSG00000232347 | 1.538018572 | 0           | 2.953280223  | 0.415379458 | 1            | AL390728.5 |
| ENSG00000287116 | 1.538018572 | 0           | 2.953280223  | 0.415379458 | 1            | AC104335.2 |
| ENSG00000147256 | 1.538018572 | 0           | 2.953280223  | 0.415379458 | 1            | ARHGAP36   |
| ENSG00000224777 | 1.538018572 | 0           | 2.953280223  | 0.415379458 | 1            | OR4F2P     |
| ENSG00000171956 | 1.538018572 | 0           | 2.953280223  | 0.415379458 | 1            | FOXB1      |
| ENSG00000260078 | 1.538018572 | 0           | 2.953280223  | 0.415379458 | 1            | AC007342.3 |
| ENSG00000228506 | 88.95282327 | 71.03091108 | 0.32405528   | 0.415385809 | 0.541393533  | AL513550.1 |
| ENSG00000004139 | 149.8948629 | 126.4130407 | 0.245845688  | 0.415508558 | 0.541521371  | SARM1      |
| ENSG00000188305 | 9.158804397 | 13.6463066  | -0.578158156 | 0.415525579 | 0.541521371  | PEAK3      |
| ENSG00000214485 | 1823.62804  | 2076.60197  | -0.187545135 | 0.415586627 | 0.541573765  | RPL7P1     |
| ENSG00000267312 | 0.601596751 | 2.058957692 | -1.783180421 | 0.415594419 | 1            | AC015911.4 |
| novel.249       | 0.586481695 | 2.455634897 | -2.056084546 | 0.415651969 | 0.541631748  | -          |
| ENSG00000280161 | 6.373500802 | 3.587770973 | 0.828459608  | 0.415774371 | 0.541741749  | AC022413.1 |
| ENSG00000182489 | 2.444210281 | 0.713078025 | 1.770847904  | 0.415778087 | 0.541741749  | XKRX       |
| ENSG00000213434 | 0           | 1.396630344 | -3.0661546   | 0.415783861 | 1            | VTI1BP2    |
| ENSG00000255441 | 0           | 1.396630344 | -3.0661546   | 0.415783861 | 1            | AC008750.2 |
| ENSG00000225496 | 0           | 1.396630344 | -3.0661546   | 0.415783861 | 1            | AC104651.1 |
| ENSG00000274258 | 0           | 1.396630344 | -3.0661546   | 0.415783861 | 1            | MIR6728    |
| ENSG00000264720 | 0           | 1.396630344 | -3.0661546   | 0.415783861 | 1            | MIR3117    |
| ENSG00000252137 | 0           | 1.396630344 | -3.0661546   | 0.415783861 | 1            | RNU6-1338P |
| ENSG00000230020 | 0           | 1.396630344 | -3.0661546   | 0.415783861 | 1            | NHS-AS1    |
| ENSG00000258602 | 0           | 1.396630344 | -3.0661546   | 0.415783861 | 1            | LINC01629  |
| ENSG00000199796 | 0           | 1.396630344 | -3.0661546   | 0.415783861 | 1            | RNU6-924P  |
| ENSG00000235421 | 1.84261353  | 0           | 3.214517692  | 0.415798006 | 1            | AC114501.2 |

|                 |             |             |              |             |             |            |
|-----------------|-------------|-------------|--------------|-------------|-------------|------------|
| ENSG00000211898 | 1.84261353  | 0           | 3.214517692  | 0.415798006 | 1           | IGHD       |
| ENSG00000256797 | 1.84261353  | 0           | 3.214517692  | 0.415798006 | 1           | KLRF2      |
| ENSG00000286684 | 1.84261353  | 0           | 3.214517692  | 0.415798006 | 1           | AL358976.2 |
| ENSG00000257585 | 1.84261353  | 0           | 3.214517692  | 0.415798006 | 1           | LINC00609  |
| ENSG00000287830 | 1.84261353  | 0           | 3.214517692  | 0.415798006 | 1           | AC007218.3 |
| ENSG00000199676 | 1.84261353  | 0           | 3.214517692  | 0.415798006 | 1           | RF00019    |
| ENSG00000242608 | 1.84261353  | 0           | 3.214517692  | 0.415798006 | 1           | RPS23P5    |
| ENSG00000254158 | 1.84261353  | 0           | 3.214517692  | 0.415798006 | 1           | AC104117.4 |
| ENSG00000211794 | 1.84261353  | 0           | 3.214517692  | 0.415798006 | 1           | TRAV12-3   |
| ENSG00000187186 | 10.58718536 | 6.685664122 | 0.654168077  | 0.415892728 | 0.541863947 | AL162231.1 |
| ENSG00000233998 | 0.61420451  | 2.089639274 | -1.781565518 | 0.41594691  | 0.541881266 | SETP5      |
| ENSG00000090447 | 195.1615389 | 167.3650604 | 0.220589125  | 0.415947735 | 0.541881266 | TFAP4      |
| ENSG00000134940 | 3.029438327 | 7.909844943 | -1.384389533 | 0.416048254 | 0.541985042 | ACRV1      |
| ENSG00000182484 | 258.7491298 | 196.6312522 | 0.397306212  | 0.416095372 | 0.542019246 | WASH6P     |
| ENSG00000287044 | 2.739958426 | 1.110911105 | 1.321203766  | 0.416129454 | 0.542036466 | AL139106.1 |
| ENSG00000227417 | 0.601596751 | 2.169915658 | -1.846201477 | 0.416255825 | 0.542151989 | AC114402.2 |
| ENSG00000149084 | 785.346044  | 955.6389216 | -0.283441866 | 0.416259878 | 0.542151989 | HSD17B12   |
| ENSG00000126870 | 667.6677717 | 548.0668683 | 0.285305871  | 0.416294986 | 0.542170536 | WDR60      |
| ENSG00000257464 | 0.616711807 | 2.679862578 | -2.11799424  | 0.416435607 | 0.542316743 | AC125611.1 |
| ENSG00000225726 | 2.435363469 | 0.774441189 | 1.694503041  | 0.41646954  | 0.542316743 | AC007000.2 |
| ENSG00000210127 | 3.916682763 | 7.64547907  | -0.970078662 | 0.416469868 | 0.542316743 | MT-TA      |
| ENSG00000082068 | 481.6468729 | 550.8825227 | -0.19323615  | 0.416643886 | 0.542494693 | WDR70      |
| ENSG00000239467 | 9.745286092 | 5.308974479 | 0.892932529  | 0.416659324 | 0.542494693 | AC007405.3 |
| ENSG00000269560 | 3.381885751 | 1.10029862  | 1.626658758  | 0.416669166 | 0.542494693 | AC010422.4 |
| novel.36        | 1.536764924 | 4.177994278 | -1.437951414 | 0.416794553 | 0.542603655 | -          |
| ENSG00000183864 | 1433.258169 | 1233.836022 | 0.216309082  | 0.416794624 | 0.542603655 | TOB2       |
| ENSG00000258359 | 4.499403511 | 1.682349583 | 1.39529561   | 0.416837385 | 0.542632133 | PCNPP1     |
| ENSG00000259225 | 1.848881773 | 0.387220594 | 2.256036436  | 0.416943172 | 1           | LINC02345  |
| ENSG00000146755 | 1.848881773 | 0.387220594 | 2.256036436  | 0.416943172 | 1           | TRIM50     |
| ENSG00000158578 | 1.848881773 | 0.387220594 | 2.256036436  | 0.416943172 | 1           | ALAS2      |
| ENSG00000273027 | 7.025457317 | 3.984448178 | 0.82020839   | 0.416958076 | 0.542762051 | AL844908.2 |
| ENSG00000255139 | 15.34207771 | 10.50596351 | 0.551850565  | 0.417129814 | 0.542955349 | AP000442.2 |
| ENSG00000106144 | 537.843595  | 449.3614145 | 0.25911522   | 0.417148367 | 0.542955349 | CASP2      |
| ENSG00000234141 | 2.755073482 | 1.049547942 | 1.373001094  | 0.417258027 | 0.543070874 | AC006042.4 |
| ENSG00000183486 | 1249.835119 | 1468.746097 | -0.232734071 | 0.417411769 | 0.543207744 | MX2        |
| ENSG00000256913 | 2.391271949 | 0.723690511 | 1.732028085  | 0.417422369 | 0.543207744 | AC005840.4 |
| ENSG00000040487 | 431.6164581 | 498.9858107 | -0.208894576 | 0.417425911 | 0.543207744 | PQLC2      |
| ENSG00000287207 | 2.727350667 | 1.110911105 | 1.315946601  | 0.417719667 | 0.54356279  | AC096861.2 |
| ENSG00000130600 | 193.1455247 | 104.4600964 | 0.88613366   | 0.417836086 | 0.543678842 | H19        |
| ENSG00000100916 | 210.4343808 | 245.962668  | -0.226033734 | 0.417851631 | 0.543678842 | BRMS1L     |
| ENSG00000236671 | 3.950745092 | 8.347944609 | -1.084949166 | 0.41789722  | 0.543678842 | PRKG1-AS1  |
| ENSG00000251175 | 2.387511003 | 0.723690511 | 1.73008937   | 0.417933741 | 0.543678842 | AC008243.1 |
| ENSG00000241288 | 36.00024269 | 48.87456604 | -0.437005017 | 0.417935174 | 0.543678842 | LINC02614  |
| ENSG00000008283 | 494.8801189 | 425.3725569 | 0.218043182  | 0.417964145 | 0.543678842 | CYB561     |
| ENSG00000123737 | 724.5979812 | 901.1939224 | -0.314758366 | 0.41797403  | 0.543678842 | EXOSC9     |
| ENSG00000234546 | 79.25155707 | 60.24752907 | 0.394563681  | 0.417976259 | 0.543678842 | LNCTAM34A  |
| ENSG00000262879 | 485.606421  | 427.1269162 | 0.185146968  | 0.418161695 | 0.543892816 | AC005670.3 |
| ENSG00000233321 | 36.41662655 | 21.03058346 | 0.79751683   | 0.418435197 | 0.544221308 | LINC02669  |
| ENSG00000286830 | 2.708474665 | 0.672939833 | 1.979730635  | 0.418505398 | 0.544285366 | AC105052.5 |
| ENSG00000224821 | 4.457819289 | 8.508497377 | -0.929806068 | 0.418599651 | 0.544380695 | COL4A2-AS2 |
| ENSG00000206582 | 0.601596751 | 1.773238453 | -1.559885395 | 0.418806574 | 1           | RF00019    |

|                 |             |             |              |             |             |            |
|-----------------|-------------|-------------|--------------|-------------|-------------|------------|
| ENSG00000248643 | 10.2586998  | 14.8670198  | -0.530459037 | 0.418830298 | 0.544653385 | RBM14-RBM4 |
| ENSG00000164896 | 1279.714474 | 1434.726997 | -0.164948182 | 0.418877709 | 0.544687776 | FASTK      |
| ENSG00000179632 | 2287.292342 | 2001.444758 | 0.192734646  | 0.418953587 | 0.544759179 | MAF1       |
| ENSG00000111817 | 1696.970997 | 2131.363178 | -0.328814606 | 0.419156714 | 0.544996026 | DSE        |
| ENSG00000124575 | 0           | 1.548882377 | -3.205223317 | 0.41928142  | 1           | HIST1H1D   |
| ENSG00000286714 | 0           | 1.548882377 | -3.205223317 | 0.41928142  | 1           | AC093001.2 |
| ENSG00000256299 | 0           | 1.548882377 | -3.205223317 | 0.41928142  | 1           | AC073912.2 |
| ENSG00000204362 | 0           | 1.548882377 | -3.205223317 | 0.41928142  | 1           | AL590644.1 |
| ENSG00000252947 | 0           | 1.548882377 | -3.205223317 | 0.41928142  | 1           | SCARNA1    |
| ENSG00000276359 | 0           | 1.548882377 | -3.205223317 | 0.41928142  | 1           | RF00017    |
| ENSG00000236975 | 0           | 1.548882377 | -3.205223317 | 0.41928142  | 1           | BX321878.1 |
| ENSG00000249706 | 0           | 1.548882377 | -3.205223317 | 0.41928142  | 1           | AC105384.1 |
| ENSG00000238386 | 0           | 1.548882377 | -3.205223317 | 0.41928142  | 1           | RNU7-48P   |
| ENSG00000216471 | 0           | 1.548882377 | -3.205223317 | 0.41928142  | 1           | RPSAP43    |
| ENSG00000233109 | 0           | 1.548882377 | -3.205223317 | 0.41928142  | 1           | AC013701.1 |
| ENSG00000245832 | 0           | 1.548882377 | -3.205223317 | 0.41928142  | 1           | MIR4300HG  |
| ENSG00000265713 | 0           | 1.548882377 | -3.205223317 | 0.41928142  | 1           | AC023389.2 |
| ENSG00000255669 | 1.843867178 | 0.356539013 | 2.252537044  | 0.419288927 | 1           | AC092471.1 |
| ENSG00000228981 | 2.699627853 | 0.672939833 | 1.975428656  | 0.419562471 | 0.5454963   | AC097658.1 |
| ENSG00000169752 | 10.17553136 | 6.206270388 | 0.723126808  | 0.41959647  | 0.545513205 | NRG4       |
| ENSG00000198742 | 698.5551618 | 811.5521713 | -0.216191823 | 0.419620101 | 0.545516022 | SMURF1     |
| ENSG00000185875 | 96.27982626 | 120.5657967 | -0.326233946 | 0.419658948 | 0.545516022 | THNSL1     |
| ENSG00000235159 | 8.737049936 | 4.554730781 | 0.932051105  | 0.419661627 | 0.545516022 | AL121672.2 |
| ENSG00000247271 | 102.5232751 | 87.66158433 | 0.225808898  | 0.419796989 | 0.545653132 | ZBED5-AS1  |
| ENSG00000278993 | 11.11954634 | 16.65215501 | -0.583751404 | 0.419809109 | 0.545653132 | AC002350.1 |
| ENSG00000113761 | 238.688729  | 280.1805374 | -0.231686074 | 0.419859399 | 0.545691197 | ZNF346     |
| ENSG00000143322 | 1667.315909 | 1336.47528  | 0.319200604  | 0.419954325 | 0.545787271 | ABL2       |
| ENSG00000115556 | 81.95390604 | 67.47857359 | 0.277848795  | 0.420017852 | 0.545842527 | PLCD4      |
| ENSG00000163754 | 553.515922  | 680.2687478 | -0.297963918 | 0.420046207 | 0.545852073 | GYG1       |
| ENSG00000234327 | 60.47411399 | 45.47730591 | 0.407482946  | 0.42010692  | 0.545903665 | AC012146.1 |
| ENSG00000267394 | 2.727350667 | 5.105971769 | -0.899018882 | 0.420220716 | 0.546024227 | AC004596.1 |
| ENSG00000224635 | 10.84894245 | 17.91074182 | -0.728579059 | 0.420282894 | 0.546077572 | AL391095.1 |
| ENSG00000274667 | 5.78451181  | 9.294706927 | -0.687733265 | 0.420321173 | 0.546077572 | AC090517.2 |
| ENSG00000136643 | 550.6534341 | 483.6606222 | 0.1872656    | 0.420324825 | 0.546077572 | RPS6KC1    |
| ENSG00000272468 | 1.54052587  | 3.658590747 | -1.250396596 | 0.420346377 | 0.546078265 | AL021807.1 |
| ENSG00000243554 | 13.85950477 | 9.193205571 | 0.5873767    | 0.420562017 | 0.546307437 | AC004967.1 |
| ENSG00000134371 | 897.769289  | 1013.01952  | -0.174366865 | 0.420564838 | 0.546307437 | CDC73      |
| ENSG00000247853 | 5.760549941 | 9.468183931 | -0.712749541 | 0.420676017 | 0.546416172 | AC006064.2 |
| ENSG00000144118 | 1213.454721 | 1356.761663 | -0.161178856 | 0.420690608 | 0.546416172 | RALB       |
| ENSG00000230359 | 4.899703401 | 9.050410149 | -0.894844271 | 0.420922547 | 0.546690097 | TPI1P2     |
| novel.281       | 1.511549406 | 0           | 2.929881234  | 0.420933017 | 1           | -          |
| ENSG00000186973 | 1.511549406 | 0           | 2.929881234  | 0.420933017 | 1           | FAM183A    |
| ENSG00000108375 | 1.511549406 | 0           | 2.929881234  | 0.420933017 | 1           | RNF43      |
| ENSG00000255946 | 1.511549406 | 0           | 2.929881234  | 0.420933017 | 1           | AC069234.1 |
| ENSG00000256723 | 1.511549406 | 0           | 2.929881234  | 0.420933017 | 1           | AP003717.3 |
| ENSG00000169224 | 1.511549406 | 0           | 2.929881234  | 0.420933017 | 1           | GCSAML     |
| ENSG00000253196 | 1.511549406 | 0           | 2.929881234  | 0.420933017 | 1           | AC083841.1 |
| ENSG00000237567 | 1.511549406 | 0           | 2.929881234  | 0.420933017 | 1           | Z97206.2   |
| ENSG00000259738 | 1.511549406 | 0           | 2.929881234  | 0.420933017 | 1           | ZNF444P1   |
| ENSG00000287695 | 1.511549406 | 0           | 2.929881234  | 0.420933017 | 1           | AC008625.1 |
| ENSG00000263120 | 1.511549406 | 0           | 2.929881234  | 0.420933017 | 1           | AC004584.3 |

|                 |             |             |              |             |             |            |
|-----------------|-------------|-------------|--------------|-------------|-------------|------------|
| ENSG00000223175 | 1.511549406 | 0           | 2.929881234  | 0.420933017 | 1           | RNU4-61P   |
| ENSG00000241243 | 1.511549406 | 0           | 2.929881234  | 0.420933017 | 1           | RN7SL629P  |
| ENSG00000240723 | 1.511549406 | 0           | 2.929881234  | 0.420933017 | 1           | RN7SL382P  |
| ENSG00000226207 | 1.511549406 | 0           | 2.929881234  | 0.420933017 | 1           | AL080316.1 |
| ENSG00000285733 | 1.511549406 | 0           | 2.929881234  | 0.420933017 | 1           | AL031315.1 |
| ENSG00000287370 | 1.511549406 | 0           | 2.929881234  | 0.420933017 | 1           | AL356317.2 |
| ENSG00000253072 | 1.511549406 | 0           | 2.929881234  | 0.420933017 | 1           | RF00324    |
| ENSG00000124103 | 4.20992361  | 1.733100261 | 1.266379458  | 0.421034185 | 0.546804539 | FAM209A    |
| ENSG00000279345 | 4.162071144 | 7.54153757  | -0.850594229 | 0.421052754 | 0.546804539 | Z98885.3   |
| ENSG00000240682 | 322.2453017 | 282.9374658 | 0.188001304  | 0.421168396 | 0.54692738  | ISY1       |
| ENSG00000171428 | 74.6458778  | 54.62934581 | 0.44673925   | 0.421343139 | 0.547126954 | NAT1       |
| ENSG00000286045 | 4.832974932 | 2.446178286 | 0.968580643  | 0.421417746 | 0.547196484 | AC005034.6 |
| ENSG00000108176 | 46.96712757 | 74.85523886 | -0.674464299 | 0.421555349 | 0.547347802 | DNAJC12    |
| ENSG00000272576 | 4.26536924  | 2.211209725 | 0.961766063  | 0.421591549 | 0.54736745  | AC027271.1 |
| ENSG00000264895 | 0.615458159 | 2.169915658 | -1.824798772 | 0.421685357 | 0.547461886 | AC006141.1 |
| ENSG00000286241 | 1.50778846  | 0           | 2.926539363  | 0.421729745 | 1           | AC080089.1 |
| ENSG00000272657 | 1.50778846  | 0           | 2.926539363  | 0.421729745 | 1           | AP000317.2 |
| ENSG00000250031 | 1.50778846  | 0           | 2.926539363  | 0.421729745 | 1           | AC009927.1 |
| ENSG00000232555 | 1.50778846  | 0           | 2.926539363  | 0.421729745 | 1           | AC104088.1 |
| ENSG00000240436 | 1.50778846  | 0           | 2.926539363  | 0.421729745 | 1           | AC114982.1 |
| ENSG00000229832 | 1.50778846  | 0           | 2.926539363  | 0.421729745 | 1           | AL360091.1 |
| ENSG00000230576 | 1.50778846  | 0           | 2.926539363  | 0.421729745 | 1           | OR6R1P     |
| ENSG00000279437 | 1.50778846  | 0           | 2.926539363  | 0.421729745 | 1           | Z82170.1   |
| ENSG00000200719 | 1.50778846  | 0           | 2.926539363  | 0.421729745 | 1           | RNA5SP260  |
| ENSG00000255652 | 1.50778846  | 0           | 2.926539363  | 0.421729745 | 1           | AC140847.2 |
| ENSG00000272942 | 1.50778846  | 0           | 2.926539363  | 0.421729745 | 1           | AL022324.3 |
| ENSG00000169964 | 14.27993431 | 22.1982814  | -0.634788562 | 0.421928026 | 0.547723454 | TMEM42     |
| novel.686       | 40.70172564 | 8.195692577 | 2.310404539  | 0.421928995 | 0.547723454 | -          |
| ENSG00000272463 | 20.82220803 | 13.70651389 | 0.602799621  | 0.421957997 | 0.547733735 | AL357054.4 |
| ENSG00000264801 | 0.879722543 | 3.423622185 | -1.943268899 | 0.422121882 | 0.547900466 | ERVFRD-3   |
| ENSG00000260190 | 4.225038666 | 7.675004776 | -0.867305879 | 0.422128618 | 0.547900466 | AL807752.5 |
| ENSG00000203446 | 0.601596751 | 2.71054416  | -2.159950815 | 0.422211661 | 0.547980875 | AC004988.1 |
| ENSG00000181744 | 370.8308803 | 458.2007184 | -0.3051303   | 0.422273362 | 0.548033579 | DIPK2A     |
| ENSG00000286964 | 40.24290371 | 29.281907   | 0.458875603  | 0.422355558 | 0.548083258 | AL136169.1 |
| ENSG00000086712 | 331.4319718 | 383.0148358 | -0.208024601 | 0.422355659 | 0.548083258 | TXLNG      |
| ENSG00000079691 | 86.06772492 | 51.09489405 | 0.750095056  | 0.422393774 | 0.548083258 | CARMIL1    |
| ENSG00000152359 | 220.7820897 | 187.3823813 | 0.237413857  | 0.422396023 | 0.548083258 | POC5       |
| ENSG00000264608 | 23.19585762 | 15.86825721 | 0.541158609  | 0.422460292 | 0.548093729 | AC005726.3 |
| ENSG00000155666 | 91.31644332 | 75.47815152 | 0.273112504  | 0.422484547 | 0.548093729 | KDM8       |
| ENSG00000131037 | 10.37077344 | 16.76555312 | -0.699463458 | 0.422486837 | 0.548093729 | EPS8L1     |
| ENSG00000100393 | 1090.901335 | 1257.375242 | -0.204697797 | 0.422488477 | 0.548093729 | EP300      |
| ENSG00000162227 | 244.0356158 | 279.2122933 | -0.194966197 | 0.422517003 | 0.548103368 | TAF6L      |
| ENSG00000258646 | 5.182915058 | 2.506385574 | 1.044929243  | 0.422565778 | 0.548139272 | AL049780.1 |
| ENSG00000100802 | 184.1969475 | 156.6876276 | 0.234084058  | 0.422710834 | 0.548300059 | C14orf93   |
| ENSG00000259442 | 0           | 1.365948763 | -3.036971264 | 0.422717361 | 1           | AC105339.3 |
| ENSG00000197320 | 0           | 1.365948763 | -3.036971264 | 0.422717361 | 1           | AC060834.1 |
| ENSG00000277173 | 0           | 1.365948763 | -3.036971264 | 0.422717361 | 1           | AC004241.4 |
| ENSG00000271991 | 0           | 1.365948763 | -3.036971264 | 0.422717361 | 1           | AC013400.1 |
| ENSG00000251555 | 0           | 1.365948763 | -3.036971264 | 0.422717361 | 1           | AC096711.2 |
| ENSG00000275226 | 0           | 1.365948763 | -3.036971264 | 0.422717361 | 1           | LINC00547  |
| ENSG00000264012 | 0           | 1.365948763 | -3.036971264 | 0.422717361 | 1           | AC091588.1 |

|                 |             |             |              |             |             |            |
|-----------------|-------------|-------------|--------------|-------------|-------------|------------|
| ENSG00000272202 | 0           | 1.365948763 | -3.036971264 | 0.422717361 | 1           | AC097358.2 |
| ENSG00000235967 | 0           | 1.365948763 | -3.036971264 | 0.422717361 | 1           | COX5BP3    |
| ENSG00000285936 | 0           | 1.365948763 | -3.036971264 | 0.422717361 | 1           | AL392024.1 |
| ENSG00000278514 | 0           | 1.365948763 | -3.036971264 | 0.422717361 | 1           | AC068831.6 |
| ENSG00000265113 | 0           | 1.365948763 | -3.036971264 | 0.422717361 | 1           | AC026474.1 |
| ENSG00000265458 | 14.27491972 | 9.417433253 | 0.603145059  | 0.42281137  | 0.548403085 | AC132938.3 |
| ENSG00000224195 | 6.92341287  | 3.698728939 | 0.918018173  | 0.422873776 | 0.548456647 | AC022400.1 |
| ENSG00000270571 | 4.306953462 | 1.518200796 | 1.522487272  | 0.42291177  | 0.548472476 | AC007681.1 |
| ENSG00000137106 | 1788.873389 | 2018.957624 | -0.174561491 | 0.422928201 | 0.548472476 | GRHPR      |
| ENSG00000110047 | 1552.916996 | 1728.323658 | -0.154497033 | 0.423013086 | 0.548555178 | EHD1       |
| ENSG00000224356 | 2.709728314 | 1.049547942 | 1.353556771  | 0.423082163 | 0.548617373 | AL356966.1 |
| ENSG00000270504 | 136.3568913 | 168.6493201 | -0.307290277 | 0.423178983 | 0.548715534 | AL391422.4 |
| ENSG00000156869 | 23.15685197 | 32.68340513 | -0.502057509 | 0.423210225 | 0.548728659 | FRRS1      |
| ENSG00000164086 | 561.2473863 | 642.7577103 | -0.195555745 | 0.423244671 | 0.548745936 | DUSP7      |
| ENSG00000223503 | 0.909952655 | 2.751966622 | -1.606909574 | 0.423287099 | 0.548773559 | AL353807.1 |
| ENSG00000250001 | 4.1771862   | 1.548882377 | 1.462598237  | 0.423522987 | 0.54905198  | AC027335.1 |
| ENSG00000214145 | 2.459325337 | 0.743759607 | 1.74124197   | 0.423590536 | 0.549112151 | LINC00887  |
| ENSG00000273473 | 6.426439134 | 2.71182843  | 1.225282908  | 0.423810867 | 0.549343084 | BX649601.1 |
| ENSG00000280033 | 8.806356973 | 5.513261459 | 0.686659592  | 0.423810968 | 0.549343084 | AC116407.4 |
| ENSG00000260404 | 175.5609456 | 227.9722921 | -0.376386879 | 0.423901752 | 0.549433346 | AC110079.1 |
| ENSG00000273301 | 1.49643435  | 0           | 2.916364027  | 0.424154533 | 1           | AC016717.2 |
| ENSG00000228401 | 1.49643435  | 0           | 2.916364027  | 0.424154533 | 1           | AL590226.1 |
| ENSG00000271996 | 1.49643435  | 0           | 2.916364027  | 0.424154533 | 1           | AC019080.4 |
| ENSG00000255384 | 1.49643435  | 0           | 2.916364027  | 0.424154533 | 1           | AP001267.2 |
| ENSG00000239881 | 1.49643435  | 0           | 2.916364027  | 0.424154533 | 1           | RPS27P25   |
| ENSG00000286327 | 1.49643435  | 0           | 2.916364027  | 0.424154533 | 1           | AL035427.2 |
| ENSG00000230323 | 1.49643435  | 0           | 2.916364027  | 0.424154533 | 1           | LINC00159  |
| ENSG00000264324 | 1.49643435  | 0           | 2.916364027  | 0.424154533 | 1           | AC006030.1 |
| ENSG00000271938 | 1.49643435  | 0           | 2.916364027  | 0.424154533 | 1           | AC103724.4 |
| ENSG00000275812 | 1.49643435  | 0           | 2.916364027  | 0.424154533 | 1           | AL121829.2 |
| ENSG00000152430 | 1.49643435  | 0           | 2.916364027  | 0.424154533 | 1           | BOLL       |
| ENSG00000274966 | 1.49643435  | 0           | 2.916364027  | 0.424154533 | 1           | AC019322.3 |
| ENSG00000261346 | 1.49643435  | 0           | 2.916364027  | 0.424154533 | 1           | AC116348.3 |
| ENSG00000238966 | 1.49643435  | 0           | 2.916364027  | 0.424154533 | 1           | RF01169    |
| ENSG00000257067 | 1.49643435  | 0           | 2.916364027  | 0.424154533 | 1           | AP000797.3 |
| ENSG00000269385 | 1.49643435  | 0           | 2.916364027  | 0.424154533 | 1           | AC020895.1 |
| ENSG00000238117 | 2.699627853 | 7.234464965 | -1.414388048 | 0.424249805 | 0.549857038 | AP000844.2 |
| ENSG00000254016 | 7.264577455 | 4.219416739 | 0.773636308  | 0.424326212 | 0.549928633 | ALG1L10P   |
| ENSG00000123595 | 725.5943064 | 591.9643198 | 0.294166298  | 0.42440782  | 0.550006962 | RAB9A      |
| ENSG00000265445 | 1.54052587  | 0           | 2.955540924  | 0.424411698 | 1           | AC005703.3 |
| ENSG00000211663 | 1.54052587  | 0           | 2.955540924  | 0.424411698 | 1           | IGLV3-19   |
| ENSG00000250378 | 1.54052587  | 0           | 2.955540924  | 0.424411698 | 1           | AC114296.1 |
| ENSG00000188676 | 1.54052587  | 0           | 2.955540924  | 0.424411698 | 1           | IDO2       |
| ENSG00000272457 | 1.54052587  | 0           | 2.955540924  | 0.424411698 | 1           | AC113194.1 |
| ENSG00000205018 | 1.54052587  | 0           | 2.955540924  | 0.424411698 | 1           | AC092384.1 |
| ENSG00000244649 | 1.54052587  | 0           | 2.955540924  | 0.424411698 | 1           | LINC02086  |
| ENSG00000243799 | 1.54052587  | 0           | 2.955540924  | 0.424411698 | 1           | PEX5L-AS1  |
| ENSG00000052344 | 1.54052587  | 0           | 2.955540924  | 0.424411698 | 1           | PRSS8      |
| ENSG00000227304 | 1.54052587  | 0           | 2.955540924  | 0.424411698 | 1           | AC067942.1 |
| ENSG00000116981 | 1.54052587  | 0           | 2.955540924  | 0.424411698 | 1           | NT5C1A     |
| ENSG00000285100 | 1.54052587  | 0           | 2.955540924  | 0.424411698 | 1           | AL359555.2 |

|                 |             |             |              |             |             |              |
|-----------------|-------------|-------------|--------------|-------------|-------------|--------------|
| ENSG00000276067 | 1.54052587  | 0           | 2.955540924  | 0.424411698 | 1           | AC009542.2   |
| ENSG00000231606 | 1.54052587  | 0           | 2.955540924  | 0.424411698 | 1           | AL357873.1   |
| ENSG00000242968 | 1.54052587  | 0           | 2.955540924  | 0.424411698 | 1           | AC096992.1   |
| ENSG00000196475 | 1.54052587  | 0           | 2.955540924  | 0.424411698 | 1           | GK2          |
| ENSG00000259523 | 1.54052587  | 0           | 2.955540924  | 0.424411698 | 1           | AC022613.2   |
| ENSG00000275772 | 1.54052587  | 0           | 2.955540924  | 0.424411698 | 1           | AC244157.2   |
| ENSG00000287868 | 2.990361403 | 5.960689341 | -0.981039419 | 0.42443748  | 0.550017965 | AL355377.4   |
| ENSG00000109475 | 8111.641227 | 9450.321122 | -0.22037148  | 0.424485415 | 0.550044054 | RPL34        |
| ENSG00000230667 | 3.033199274 | 5.522718069 | -0.856218321 | 0.424511179 | 0.550044054 | SETSIP       |
| ENSG00000272567 | 3.695256249 | 1.467450118 | 1.339478503  | 0.424521126 | 0.550044054 | AC109347.2   |
| ENSG00000180211 | 15.20249472 | 10.72086298 | 0.500392824  | 0.424601273 | 0.550120464 | FO393411.1   |
| novel.755       | 1.493927053 | 0           | 2.914117288  | 0.424691634 | 1           | -            |
| ENSG00000229109 | 1.493927053 | 0           | 2.914117288  | 0.424691634 | 1           | AL137847.1   |
| ENSG00000234724 | 1.493927053 | 0           | 2.914117288  | 0.424691634 | 1           | HDAC1P1      |
| ENSG00000254815 | 1.493927053 | 0           | 2.914117288  | 0.424691634 | 1           | AP006284.1   |
| ENSG00000254946 | 1.493927053 | 0           | 2.914117288  | 0.424691634 | 1           | AC073172.2   |
| ENSG00000287248 | 1.493927053 | 0           | 2.914117288  | 0.424691634 | 1           | AC009271.2   |
| ENSG00000230269 | 1.493927053 | 0           | 2.914117288  | 0.424691634 | 1           | LINC02525    |
| ENSG00000284418 | 1.493927053 | 0           | 2.914117288  | 0.424691634 | 1           | AL391117.1   |
| ENSG00000253770 | 1.493927053 | 0           | 2.914117288  | 0.424691634 | 1           | HMGB1P23     |
| ENSG00000120471 | 1.493927053 | 0           | 2.914117288  | 0.424691634 | 1           | TP53AIP1     |
| ENSG00000276097 | 1.493927053 | 0           | 2.914117288  | 0.424691634 | 1           | AC006538.4   |
| ENSG00000250170 | 1.493927053 | 0           | 2.914117288  | 0.424691634 | 1           | RASA2-IT1    |
| ENSG00000237378 | 1.493927053 | 0           | 2.914117288  | 0.424691634 | 1           | AL445989.1   |
| ENSG00000215278 | 1.493927053 | 0           | 2.914117288  | 0.424691634 | 1           | RPS7P6       |
| ENSG00000224775 | 1.493927053 | 0           | 2.914117288  | 0.424691634 | 1           | BRAFP1       |
| ENSG00000187791 | 1.493927053 | 0           | 2.914117288  | 0.424691634 | 1           | FAM205C      |
| ENSG00000270846 | 1.493927053 | 0           | 2.914117288  | 0.424691634 | 1           | AC021171.2   |
| ENSG00000239317 | 1.493927053 | 0           | 2.914117288  | 0.424691634 | 1           | AC091959.1   |
| ENSG00000258449 | 1.493927053 | 0           | 2.914117288  | 0.424691634 | 1           | AC023510.1   |
| ENSG00000259296 | 1.493927053 | 0           | 2.914117288  | 0.424691634 | 1           | AC020892.2   |
| ENSG00000180284 | 1.493927053 | 0           | 2.914117288  | 0.424691634 | 1           | AL049610.1   |
| ENSG00000200731 | 1.493927053 | 0           | 2.914117288  | 0.424691634 | 1           | RNU1-124P    |
| ENSG00000253528 | 1.493927053 | 0           | 2.914117288  | 0.424691634 | 1           | AC087752.2   |
| ENSG00000256972 | 1.493927053 | 0           | 2.914117288  | 0.424691634 | 1           | AP000462.3   |
| ENSG00000227790 | 1.493927053 | 0           | 2.914117288  | 0.424691634 | 1           | SPECC1P1     |
| ENSG00000280080 | 1.510295757 | 3.251301057 | -1.102037939 | 0.424759796 | 0.550298407 | TBC1D22A-AS1 |
| ENSG00000167774 | 2.684512796 | 0.672939833 | 1.968437965  | 0.424904324 | 0.550458202 | AC010323.1   |
| ENSG00000198155 | 36.62447639 | 49.19019617 | -0.425250203 | 0.425141232 | 0.550737652 | ZNF876P      |
| ENSG00000197251 | 1.536764924 | 0           | 2.9522438    | 0.425183682 | 1           | LINC00336    |
| ENSG00000276923 | 1.536764924 | 0           | 2.9522438    | 0.425183682 | 1           | AL139351.1   |
| novel.119       | 1.536764924 | 0           | 2.9522438    | 0.425183682 | 1           | -            |
| ENSG00000287881 | 1.536764924 | 0           | 2.9522438    | 0.425183682 | 1           | AC079148.3   |
| ENSG00000142615 | 1.536764924 | 0           | 2.9522438    | 0.425183682 | 1           | CELA2A       |
| ENSG00000279885 | 1.536764924 | 0           | 2.9522438    | 0.425183682 | 1           | AP005060.1   |
| ENSG00000234161 | 1.536764924 | 0           | 2.9522438    | 0.425183682 | 1           | PABPC5-AS1   |
| ENSG00000224101 | 1.536764924 | 0           | 2.9522438    | 0.425183682 | 1           | ELMO1-AS1    |
| novel.852       | 1.536764924 | 0           | 2.9522438    | 0.425183682 | 1           | -            |
| ENSG00000204347 | 1.536764924 | 0           | 2.9522438    | 0.425183682 | 1           | BTBD17       |
| ENSG00000224520 | 1.536764924 | 0           | 2.9522438    | 0.425183682 | 1           | KRT8P45      |
| ENSG00000227770 | 1.536764924 | 0           | 2.9522438    | 0.425183682 | 1           | RPL7P12      |



|                 |             |             |              |             |             |             |
|-----------------|-------------|-------------|--------------|-------------|-------------|-------------|
| ENSG00000287995 | 1.536764924 | 0           | 2.9522438    | 0.425183682 | 1           | AC092053.6  |
| ENSG00000249584 | 1.536764924 | 0           | 2.9522438    | 0.425183682 | 1           | LINC02225   |
| ENSG00000258654 | 1.536764924 | 0           | 2.9522438    | 0.425183682 | 1           | AC026495.1  |
| ENSG00000267057 | 1.536764924 | 0           | 2.9522438    | 0.425183682 | 1           | LINC01905   |
| ENSG00000208772 | 11.69592758 | 7.388001267 | 0.676090961  | 0.425222146 | 0.550815006 | SNORD94     |
| ENSG00000226985 | 1.759445085 | 0           | 3.151083302  | 0.425287338 | 1           | LINC01203   |
| ENSG00000139445 | 1.759445085 | 0           | 3.151083302  | 0.425287338 | 1           | FOXN4       |
| ENSG00000285486 | 1.759445085 | 0           | 3.151083302  | 0.425287338 | 1           | AC003043.2  |
| ENSG00000263305 | 1.759445085 | 0           | 3.151083302  | 0.425287338 | 1           | AP005530.1  |
| ENSG00000226249 | 1.759445085 | 0           | 3.151083302  | 0.425287338 | 1           | AL365271.1  |
| ENSG00000200041 | 1.759445085 | 0           | 3.151083302  | 0.425287338 | 1           | RF00019     |
| ENSG00000258053 | 1.759445085 | 0           | 3.151083302  | 0.425287338 | 1           | AC025575.2  |
| ENSG00000187026 | 1.759445085 | 0           | 3.151083302  | 0.425287338 | 1           | KRTAP21-2   |
| novel.231       | 1.759445085 | 0           | 3.151083302  | 0.425287338 | 1           | -           |
| ENSG00000221025 | 1.759445085 | 0           | 3.151083302  | 0.425287338 | 1           | MIR1250     |
| ENSG00000213104 | 1.759445085 | 0           | 3.151083302  | 0.425287338 | 1           | NPM1P46     |
| ENSG00000122585 | 1.759445085 | 0           | 3.151083302  | 0.425287338 | 1           | NPY         |
| ENSG00000227773 | 1.759445085 | 0           | 3.151083302  | 0.425287338 | 1           | ASH1L-IT1   |
| ENSG00000226753 | 1.759445085 | 0           | 3.151083302  | 0.425287338 | 1           | AL451105.1  |
| ENSG00000276961 | 1.759445085 | 0           | 3.151083302  | 0.425287338 | 1           | MIR7848     |
| ENSG00000225303 | 1.759445085 | 0           | 3.151083302  | 0.425287338 | 1           | AL117341.1  |
| ENSG00000257680 | 1.759445085 | 0           | 3.151083302  | 0.425287338 | 1           | AC016144.1  |
| ENSG00000275898 | 1.759445085 | 0           | 3.151083302  | 0.425287338 | 1           | AC125603.4  |
| ENSG00000233840 | 1.759445085 | 0           | 3.151083302  | 0.425287338 | 1           | PCDH9-AS4   |
| novel.661       | 2.142122621 | 5.777627333 | -1.425411115 | 0.425406582 | 0.551026444 | -           |
| ENSG00000246596 | 26.84430159 | 18.5032297  | 0.539861579  | 0.425435526 | 0.55102661  | AC139795.1  |
| ENSG00000269825 | 38.11757707 | 50.52430748 | -0.40791004  | 0.425449128 | 0.55102661  | AC022150.4  |
| ENSG00000268279 | 28.88409503 | 18.66969024 | 0.631340854  | 0.425473943 | 0.551031281 | AC090004.1  |
| ENSG00000230562 | 34.18689035 | 26.4945069  | 0.371905396  | 0.425531311 | 0.551065557 | FAM133DP    |
| ENSG00000261485 | 39.06431281 | 28.51692242 | 0.451371371  | 0.42554283  | 0.551065557 | PAN3-AS1    |
| ENSG00000232284 | 17.88442895 | 27.73644507 | -0.631215908 | 0.425613406 | 0.55112948  | GNG12-AS1   |
| ENSG00000283913 | 0.61420451  | 2.415496705 | -1.988085487 | 0.425710717 | 0.551228016 | AL512662.2  |
| ENSG00000271401 | 3.058414791 | 1.130980201 | 1.457971152  | 0.425796366 | 0.551307849 | AC010680.5  |
| ENSG00000280202 | 16.16789301 | 26.36617677 | -0.710264771 | 0.425814811 | 0.551307849 | AC005831.1  |
| ENSG00000285999 | 5.406848869 | 9.653686084 | -0.842355503 | 0.425840018 | 0.551313011 | AC025442.2  |
| ENSG00000100290 | 10.31289178 | 5.562856261 | 0.89951099   | 0.426046558 | 0.551528777 | BIK         |
| ENSG00000265055 | 3.93054417  | 1.783850939 | 1.137465003  | 0.426049134 | 0.551528777 | AC145343.1  |
| ENSG00000237756 | 0.879722543 | 3.300895859 | -1.894517047 | 0.426151746 | 0.551634125 | AL592435.2  |
| ENSG00000145391 | 1786.355695 | 2027.123622 | -0.182543201 | 0.426474927 | 0.552010706 | SETD7       |
| ENSG00000234084 | 17.30783425 | 10.44704049 | 0.72287882   | 0.426485158 | 0.552010706 | AL049552.1  |
| ENSG00000273066 | 28.96127997 | 21.28818965 | 0.446445837  | 0.426577015 | 0.552087111 | AL355987.4  |
| ENSG00000116641 | 1095.651385 | 1268.433569 | -0.211096984 | 0.426599733 | 0.552087111 | DOCK7       |
| ENSG00000228933 | 2.46684723  | 0.336469917 | 2.673289863  | 0.426607938 | 0.552087111 | AC107419.1  |
| ENSG00000253167 | 5.408102518 | 2.762579107 | 0.952305831  | 0.426825341 | 0.552340946 | WASHC5-AS1  |
| ENSG00000104765 | 2642.834436 | 3333.044452 | -0.334686856 | 0.427028835 | 0.552569143 | BNIP3L      |
| ENSG00000253702 | 0.922560414 | 2.506385574 | -1.451184137 | 0.427058343 | 0.552569143 | AC026904.3  |
| ENSG00000232093 | 4.55610279  | 7.409354633 | -0.709678211 | 0.427065486 | 0.552569143 | DCST1-AS1   |
| ENSG00000256984 | 1.526664462 | 0           | 2.943314301  | 0.427273069 | 1           | AC008013.2  |
| ENSG00000229468 | 1.526664462 | 0           | 2.943314301  | 0.427273069 | 1           | RPL39P18    |
| ENSG00000236320 | 1.526664462 | 0           | 2.943314301  | 0.427273069 | 1           | SLFN14      |
| ENSG00000235875 | 1.526664462 | 0           | 2.943314301  | 0.427273069 | 1           | ARHGEF7-AS2 |

|                 |             |             |              |             |             |            |
|-----------------|-------------|-------------|--------------|-------------|-------------|------------|
| ENSG00000249631 | 1.526664462 | 0           | 2.943314301  | 0.427273069 | 1           | AC005699.1 |
| ENSG00000275850 | 1.526664462 | 0           | 2.943314301  | 0.427273069 | 1           | AC005912.2 |
| ENSG00000234231 | 1.526664462 | 0           | 2.943314301  | 0.427273069 | 1           | AC093616.1 |
| ENSG00000253591 | 1.526664462 | 0           | 2.943314301  | 0.427273069 | 1           | AC027312.1 |
| ENSG00000199331 | 1.526664462 | 0           | 2.943314301  | 0.427273069 | 1           | RF00019    |
| ENSG00000271596 | 1.526664462 | 0           | 2.943314301  | 0.427273069 | 1           | AC008121.1 |
| ENSG00000206585 | 1.526664462 | 0           | 2.943314301  | 0.427273069 | 1           | RNVU1-7    |
| ENSG00000240021 | 1.526664462 | 0           | 2.943314301  | 0.427273069 | 1           | TEX35      |
| ENSG00000275348 | 1.526664462 | 0           | 2.943314301  | 0.427273069 | 1           | AC096861.1 |
| ENSG00000279153 | 1.526664462 | 0           | 2.943314301  | 0.427273069 | 1           | AC117500.4 |
| ENSG00000258407 | 1.526664462 | 0           | 2.943314301  | 0.427273069 | 1           | AL157955.1 |
| ENSG00000261544 | 0.293240848 | 2.139234076 | -2.717355808 | 0.427656988 | 1           | AC011939.2 |
| ENSG00000271286 | 0.293240848 | 2.139234076 | -2.717355808 | 0.427656988 | 1           | U73023.1   |
| ENSG00000260233 | 38.68288892 | 29.70695404 | 0.378773432  | 0.427765039 | 0.553446714 | SSSCA1-AS1 |
| ENSG00000223598 | 2.45681804  | 0.336469917 | 2.667709947  | 0.427828029 | 0.553485426 | AL138733.1 |
| ENSG00000143554 | 11.5840674  | 17.47490673 | -0.591899665 | 0.427842205 | 0.553485426 | SLC27A3    |
| ENSG00000183160 | 490.8301225 | 616.6700011 | -0.328919431 | 0.42785887  | 0.553485426 | TMEM119    |
| ENSG00000118557 | 25.14245343 | 17.44538102 | 0.532452355  | 0.427965278 | 0.553589075 | PMFBP1     |
| ENSG00000269609 | 100.0138747 | 79.97627104 | 0.319816083  | 0.427981608 | 0.553589075 | RPARP-AS1  |
| ENSG00000250697 | 2.157237677 | 5.980758437 | -1.470819096 | 0.428130013 | 0.553753466 | AC010343.3 |
| ENSG00000277075 | 9.421815132 | 6.003267678 | 0.640948099  | 0.428170147 | 0.553777806 | HIST1H2AE  |
| novel.872       | 6.992719907 | 4.270167417 | 0.705090511  | 0.428228228 | 0.553825357 | -          |
| ENSG00000261002 | 2.695866906 | 1.049547942 | 1.347732511  | 0.428283661 | 0.553866407 | AC036103.1 |
| ENSG00000154957 | 199.8590199 | 162.306804  | 0.298855289  | 0.428302605 | 0.553866407 | ZNF18      |
| ENSG00000213373 | 1.521649867 | 0           | 2.93888142   | 0.428313487 | 1           | LINC00671  |
| ENSG00000237359 | 1.521649867 | 0           | 2.93888142   | 0.428313487 | 1           | AL354977.2 |
| novel.1110      | 1.521649867 | 0           | 2.93888142   | 0.428313487 | 1           | -          |
| ENSG00000253496 | 1.521649867 | 0           | 2.93888142   | 0.428313487 | 1           | AC011586.2 |
| ENSG00000249275 | 1.521649867 | 0           | 2.93888142   | 0.428313487 | 1           | AC093817.1 |
| ENSG00000254852 | 1.521649867 | 0           | 2.93888142   | 0.428313487 | 1           | NPIPA2     |
| ENSG00000219986 | 1.521649867 | 0           | 2.93888142   | 0.428313487 | 1           | BTF3P7     |
| ENSG00000235007 | 1.521649867 | 0           | 2.93888142   | 0.428313487 | 1           | AL161785.2 |
| ENSG00000224048 | 1.521649867 | 0           | 2.93888142   | 0.428313487 | 1           | LINC02612  |
| ENSG00000234557 | 1.521649867 | 0           | 2.93888142   | 0.428313487 | 1           | PPIAP90    |
| ENSG00000233067 | 1.521649867 | 0           | 2.93888142   | 0.428313487 | 1           | PTCHD1-AS  |
| ENSG00000213409 | 1.521649867 | 0           | 2.93888142   | 0.428313487 | 1           | C1QBPP2    |
| ENSG00000229894 | 1.521649867 | 0           | 2.93888142   | 0.428313487 | 1           | GK3P       |
| ENSG00000225235 | 1.521649867 | 0           | 2.93888142   | 0.428313487 | 1           | INTS6L-AS1 |
| ENSG00000234848 | 1.521649867 | 0           | 2.93888142   | 0.428313487 | 1           | AC008758.2 |
| ENSG00000269009 | 1.521649867 | 0           | 2.93888142   | 0.428313487 | 1           | SLC6A21P   |
| ENSG00000234481 | 1.521649867 | 0           | 2.93888142   | 0.428313487 | 1           | AC117945.1 |
| ENSG00000248956 | 1.521649867 | 0           | 2.93888142   | 0.428313487 | 1           | HMGB1P44   |
| ENSG00000111262 | 1.521649867 | 0           | 2.93888142   | 0.428313487 | 1           | KCNA1      |
| ENSG00000267924 | 1.521649867 | 0           | 2.93888142   | 0.428313487 | 1           | AC139769.2 |
| ENSG00000279891 | 2.373649595 | 0.723690511 | 1.722554704  | 0.428412948 | 0.553981526 | AC022498.2 |
| ENSG00000182759 | 1.203193503 | 2.954969332 | -1.284075523 | 0.42867848  | 0.554297297 | MAFA       |
| ENSG00000169018 | 1151.377087 | 1314.204253 | -0.190588927 | 0.428759803 | 0.554374861 | FEM1B      |
| ENSG00000280426 | 3.376799885 | 1.029478846 | 1.693321595  | 0.428817455 | 0.554421812 | AC084876.2 |
| ENSG00000240854 | 3.33904788  | 6.064630841 | -0.863763075 | 0.428943797 | 0.554525527 | AC117409.1 |
| ENSG00000198729 | 9.85610608  | 4.596024848 | 1.095251431  | 0.42895329  | 0.554525527 | PPP1R14C   |
| ENSG00000102030 | 565.1526589 | 639.951491  | -0.179428516 | 0.428974915 | 0.554525527 | NAA10      |

|                 |             |             |              |             |             |              |
|-----------------|-------------|-------------|--------------|-------------|-------------|--------------|
| ENSG00000197279 | 16.20034568 | 10.39372128 | 0.651785752  | 0.428983048 | 0.554525527 | ZNF165       |
| ENSG00000176473 | 128.5016442 | 161.361326  | -0.330198179 | 0.429084324 | 0.554628847 | WDR25        |
| ENSG00000288059 | 1.774560141 | 0.387220594 | 2.202931181  | 0.429494483 | 1           | AL445213.2   |
| ENSG00000225190 | 1.774560141 | 0.387220594 | 2.202931181  | 0.429494483 | 1           | PLEKHM1      |
| ENSG00000254550 | 1.774560141 | 0.387220594 | 2.202931181  | 0.429494483 | 1           | OMP          |
| ENSG00000228860 | 1.774560141 | 0.387220594 | 2.202931181  | 0.429494483 | 1           | AL731547.1   |
| ENSG00000267117 | 0.908699006 | 2.456790772 | -1.441540479 | 0.429583288 | 0.555246178 | AC010525.1   |
| ENSG00000198276 | 720.0366633 | 855.5727686 | -0.248595378 | 0.429679784 | 0.555343272 | UCKL1        |
| ENSG00000243819 | 7.903926211 | 4.13798448  | 0.918235026  | 0.429792646 | 0.555434167 | RN7SL832P    |
| ENSG00000274333 | 12.48775182 | 6.815535308 | 0.872250997  | 0.429792867 | 0.555434167 | CU633967.1   |
| ENSG00000279265 | 9.058013599 | 5.584081233 | 0.714761006  | 0.429855745 | 0.555487795 | AC000123.2   |
| ENSG00000269970 | 1.495180701 | 3.688116453 | -1.291170404 | 0.42993313  | 0.555560163 | AL162424.1   |
| ENSG00000077454 | 268.6744984 | 323.6264851 | -0.268829222 | 0.429974788 | 0.555586361 | LRCH4        |
| ENSG00000259015 | 1.203193503 | 2.833398881 | -1.236649322 | 0.430005685 | 0.555598653 | AL442663.4   |
| ENSG00000089048 | 451.6187048 | 531.6856886 | -0.235817623 | 0.430045953 | 0.555623049 | ESF1         |
| ENSG00000232862 | 3.268487194 | 1.436768536 | 1.191301665  | 0.430311268 | 0.555938193 | AL138787.1   |
| ENSG00000227533 | 10.76104414 | 18.27070128 | -0.766693519 | 0.430373711 | 0.555991218 | SLC2A1-AS1   |
| ENSG00000106571 | 426.3672293 | 330.2654953 | 0.368884924  | 0.430443264 | 0.55603067  | GLI3         |
| ENSG00000124507 | 9.851091485 | 4.473170127 | 1.145734212  | 0.430481163 | 0.55603067  | PACSL1       |
| ENSG00000091128 | 6.903283219 | 4.045811341 | 0.785714936  | 0.430493089 | 0.55603067  | LAMB4        |
| ENSG00000184389 | 2.698374204 | 1.060160428 | 1.341644726  | 0.430496459 | 0.55603067  | A3GALT2      |
| ENSG00000263164 | 3.911668168 | 1.702418679 | 1.174918331  | 0.430511257 | 0.55603067  | AC087500.2   |
| ENSG00000260528 | 17.33179612 | 9.689072381 | 0.839894145  | 0.430554827 | 0.556057902 | FAM157C      |
| ENSG00000272146 | 3.330201067 | 1.386017859 | 1.245034549  | 0.430575147 | 0.556057902 | ARF4-AS1     |
| ENSG00000050344 | 380.110692  | 319.2830449 | 0.252501772  | 0.430708529 | 0.556202509 | NFE2L3       |
| ENSG00000254473 | 41.83317643 | 30.71405203 | 0.443399236  | 0.430735089 | 0.556209162 | AL354920.1   |
| ENSG00000262766 | 6.557104039 | 12.32995264 | -0.906500842 | 0.430765972 | 0.556221397 | AC135050.5   |
| ENSG00000112335 | 3301.420148 | 2949.978174 | 0.162398945  | 0.430908931 | 0.556378338 | SNX3         |
| ENSG00000243849 | 0.600343103 | 2.069570178 | -1.790174281 | 0.430998198 | 1           | CFAP44-AS1   |
| ENSG00000288095 | 7.254476994 | 4.22887335  | 0.769697889  | 0.431049326 | 0.556531956 | AC005618.4   |
| ENSG00000072121 | 720.0449827 | 624.1767725 | 0.206081694  | 0.431141495 | 0.556623295 | ZFYVE26      |
| ENSG00000219133 | 1.509042109 | 3.657434872 | -1.271554558 | 0.431280293 | 0.556766082 | AL592114.1   |
| ENSG00000189099 | 1.773306493 | 0.356539013 | 2.201997047  | 0.431299915 | 1           | PRSS48       |
| ENSG00000235436 | 1.773306493 | 0.356539013 | 2.201997047  | 0.431299915 | 1           | DPY19L2P4    |
| ENSG00000259405 | 1.773306493 | 0.356539013 | 2.201997047  | 0.431299915 | 1           | ISCA1P4      |
| ENSG00000287503 | 1.773306493 | 0.356539013 | 2.201997047  | 0.431299915 | 1           | AC027243.3   |
| ENSG00000267040 | 32.56480569 | 23.20910382 | 0.483042087  | 0.431303301 | 0.556766082 | AC027097.1   |
| ENSG00000257964 | 5.448433091 | 2.762579107 | 0.961760892  | 0.431319667 | 0.556766082 | AC020612.3   |
| ENSG00000273165 | 4.530887272 | 1.782695063 | 1.342668273  | 0.431337812 | 0.556766082 | AL121652.1   |
| ENSG00000267676 | 4.916143377 | 1.345879667 | 1.850494598  | 0.431387935 | 0.556803116 | THA1P        |
| ENSG00000240322 | 3.883945353 | 1.722487775 | 1.154894953  | 0.431732335 | 0.55721996  | RN7SL481P    |
| ENSG00000224032 | 382.0875888 | 331.2909117 | 0.20674415   | 0.431861247 | 0.55733152  | EPB41L4A-AS1 |
| ENSG00000159363 | 982.8810583 | 1164.170666 | -0.244441532 | 0.431861674 | 0.55733152  | ATP13A2      |
| ENSG00000222282 | 2.697120555 | 1.110911105 | 1.302439698  | 0.431890878 | 0.557341523 | RNU6-584P    |
| ENSG00000183196 | 109.556183  | 90.61313322 | 0.272406985  | 0.432043171 | 0.557510362 | CHST6        |
| ENSG00000266980 | 1.214547612 | 2.904218654 | -1.255555718 | 0.432088668 | 0.55754138  | AC087289.2   |
| ENSG00000229601 | 1.774560141 | 0.336469917 | 2.202885061  | 0.432130433 | 1           | AL590762.4   |
| ENSG00000268163 | 1.774560141 | 0.336469917 | 2.202885061  | 0.432130433 | 1           | AC004076.1   |
| ENSG00000273449 | 30.05866808 | 20.44536884 | 0.553193679  | 0.432152296 | 0.557580339 | AC093788.1   |
| ENSG00000136573 | 3.068443981 | 6.94887412  | -1.180008955 | 0.432182705 | 0.557580339 | BLK          |
| ENSG00000146376 | 719.0642678 | 835.0820642 | -0.215459477 | 0.432183244 | 0.557580339 | ARHGAP18     |

|                 |             |             |              |             |             |            |
|-----------------|-------------|-------------|--------------|-------------|-------------|------------|
| ENSG00000207234 | 1.773306493 | 0.336469917 | 2.201978188  | 0.432348337 | 1           | RNU6-125P  |
| ENSG00000223263 | 2.738704777 | 1.130980201 | 1.304172392  | 0.432367137 | 0.55778989  | RNU6-387P  |
| novel.332       | 5.479916852 | 9.324104239 | -0.758662411 | 0.432576209 | 0.558031901 | -          |
| ENSG00000226944 | 3.315086011 | 6.338453325 | -0.923343907 | 0.432718863 | 0.558188212 | AL031847.1 |
| ENSG00000204370 | 1201.836406 | 1046.462575 | 0.199466064  | 0.432795172 | 0.55824652  | SDHD       |
| ENSG00000185787 | 5143.791422 | 5852.440051 | -0.186224113 | 0.43280938  | 0.55824652  | MORF4L1    |
| ENSG00000279923 | 12.61465577 | 7.318465763 | 0.77831802   | 0.432828525 | 0.55824652  | AC022417.1 |
| ENSG00000139675 | 342.2357825 | 397.7191795 | -0.217340454 | 0.432942467 | 0.55836576  | HNRNPA1L2  |
| ENSG00000184979 | 198.1737818 | 241.2677575 | -0.285123979 | 0.432989919 | 0.55839924  | USP18      |
| ENSG00000081985 | 6.012206566 | 3.005720009 | 1.019472192  | 0.43304685  | 0.55844494  | IL12RB2    |
| ENSG00000197989 | 366.2214    | 450.0092422 | -0.297568781 | 0.433108598 | 0.558476557 | SNHG12     |
| ENSG00000176058 | 263.6174482 | 303.6217844 | -0.204397244 | 0.433114358 | 0.558476557 | TPRN       |
| ENSG00000261578 | 19.30062943 | 28.27951372 | -0.551675592 | 0.433146158 | 0.558489843 | AP003119.3 |
| ENSG00000122034 | 1825.031319 | 1579.531354 | 0.208230401  | 0.433227382 | 0.558546549 | GTF3A      |
| ENSG00000127838 | 1092.600645 | 1284.425337 | -0.233228105 | 0.433233134 | 0.558546549 | PNKD       |
| ENSG00000154144 | 681.6050023 | 587.2860916 | 0.21542171   | 0.43330172  | 0.558607254 | TBRG1      |
| ENSG00000215032 | 0.601596751 | 1.753169357 | -1.547479056 | 0.433453553 | 1           | GNL3LP1    |
| ENSG00000125508 | 3.37178529  | 1.365948763 | 1.274566776  | 0.433498748 | 0.55883353  | SRMS       |
| ENSG00000163138 | 310.2332829 | 273.1500554 | 0.183040523  | 0.43359991  | 0.558936208 | PACRGL     |
| ENSG00000275874 | 3.700270845 | 0.672939833 | 2.438556233  | 0.433630583 | 0.558948014 | PICRAR     |
| ENSG0000022567  | 111.5421405 | 84.21845381 | 0.402713085  | 0.433657885 | 0.558955475 | SLC45A4    |
| ENSG00000232995 | 25.22436822 | 17.55176267 | 0.518658521  | 0.433744378 | 0.559013769 | AL592435.1 |
| ENSG00000149289 | 1435.108312 | 1054.065493 | 0.445358606  | 0.433746144 | 0.559013769 | ZC3H12C    |
| ENSG00000287735 | 10.39194328 | 16.8657702  | -0.694465915 | 0.433852519 | 0.55912313  | AL355075.6 |
| ENSG00000247400 | 41.6416953  | 32.74348402 | 0.343048784  | 0.434108175 | 0.559424855 | DNAJC3-DT  |
| ENSG00000274180 | 263.8260093 | 337.8965906 | -0.356587189 | 0.434147182 | 0.559447373 | NATD1      |
| ENSG00000140455 | 308.1447393 | 355.8541488 | -0.206903916 | 0.43435567  | 0.559688274 | USP3       |
| ENSG00000187051 | 1339.679663 | 1161.796044 | 0.205293831  | 0.434465269 | 0.559801733 | RPS19BP1   |
| ENSG00000141255 | 6.466413702 | 2.11916498  | 1.607405875  | 0.434525521 | 0.559851602 | SPATA22    |
| ENSG00000167508 | 724.30075   | 835.16699   | -0.205239994 | 0.434610553 | 0.559933391 | MVD        |
| ENSG00000143469 | 70.08741026 | 93.6962571  | -0.417838736 | 0.43469246  | 0.560011147 | SYT14      |
| ENSG00000175322 | 90.73823897 | 72.25367924 | 0.330609778  | 0.434790942 | 0.560108106 | ZNF519     |
| ENSG00000227911 | 2.66939774  | 0.672939833 | 1.961831357  | 0.434826957 | 0.560108106 | LINC02344  |
| ENSG00000130768 | 2.450478525 | 0.774441189 | 1.699311827  | 0.434853955 | 0.560108106 | SMPDL3B    |
| ENSG00000126010 | 2.450478525 | 0.774441189 | 1.699311827  | 0.434853955 | 0.560108106 | GRPR       |
| novel.1006      | 4.913636079 | 15.30640373 | -1.641488057 | 0.435123902 | 0.560428024 | -          |
| ENSG00000183775 | 15.95656696 | 27.89858607 | -0.81047316  | 0.435171279 | 0.56046126  | KCTD16     |
| ENSG00000140937 | 1131.276632 | 1563.06059  | -0.466541333 | 0.435202817 | 0.560474094 | CDH11      |
| ENSG00000204866 | 2.373649595 | 0.743759607 | 1.696774353  | 0.435347612 | 0.560604991 | IGFL2      |
| ENSG00000259232 | 2.373649595 | 0.743759607 | 1.696774353  | 0.435347612 | 0.560604991 | AC105129.1 |
| ENSG00000175279 | 28.2843214  | 39.46355414 | -0.485229622 | 0.43547398  | 0.560739925 | CENPS      |
| ENSG00000240509 | 27.99860244 | 36.36296406 | -0.377627542 | 0.435618667 | 0.560898434 | RPL34P18   |
| ENSG00000239122 | 0.616711807 | 2.395427609 | -1.972842873 | 0.435699649 | 0.560974903 | RNU2-11P   |
| ENSG00000267150 | 2.694613258 | 5.411760104 | -1.000250664 | 0.435939781 | 0.561256266 | AC006557.1 |
| ENSG00000196652 | 314.9291112 | 356.6973204 | -0.179969533 | 0.43611292  | 0.561451355 | ZKSCAN5    |
| ENSG00000234948 | 0           | 1.426156051 | -3.09422854  | 0.43613341  | 1           | LINC01524  |
| ENSG00000269374 | 0           | 1.426156051 | -3.09422854  | 0.43613341  | 1           | AC011497.2 |
| ENSG00000255097 | 0           | 1.426156051 | -3.09422854  | 0.43613341  | 1           | AP006259.1 |
| ENSG00000239005 | 0           | 1.426156051 | -3.09422854  | 0.43613341  | 1           | RF01225    |
| ENSG00000256450 | 0           | 1.426156051 | -3.09422854  | 0.43613341  | 1           | AC007552.1 |
| ENSG00000215208 | 0           | 1.426156051 | -3.09422854  | 0.43613341  | 1           | KRT18P60   |

|                 |             |             |              |             |             |            |
|-----------------|-------------|-------------|--------------|-------------|-------------|------------|
| ENSG00000221038 | 0           | 1.426156051 | -3.09422854  | 0.43613341  | 1           | RNU6ATAC7P |
| ENSG00000237330 | 0           | 1.426156051 | -3.09422854  | 0.43613341  | 1           | RNF223     |
| ENSG00000284138 | 0           | 1.426156051 | -3.09422854  | 0.43613341  | 1           | ATP6V0CP4  |
| ENSG00000232762 | 0           | 1.426156051 | -3.09422854  | 0.43613341  | 1           | AL355483.2 |
| ENSG00000283698 | 0           | 1.426156051 | -3.09422854  | 0.43613341  | 1           | VINAC1P    |
| ENSG00000231254 | 0           | 1.426156051 | -3.09422854  | 0.43613341  | 1           | PCED1CP    |
| ENSG00000270285 | 0           | 1.426156051 | -3.09422854  | 0.43613341  | 1           | AC124916.2 |
| ENSG00000244748 | 0           | 1.426156051 | -3.09422854  | 0.43613341  | 1           | RN7SL153P  |
| ENSG00000248560 | 0           | 1.426156051 | -3.09422854  | 0.43613341  | 1           | AC008620.2 |
| ENSG00000238886 | 0           | 1.426156051 | -3.09422854  | 0.43613341  | 1           | SNORD121A  |
| ENSG00000229327 | 0           | 1.426156051 | -3.09422854  | 0.43613341  | 1           | AL391839.1 |
| ENSG00000256632 | 0           | 1.426156051 | -3.09422854  | 0.43613341  | 1           | AC135586.2 |
| ENSG00000283159 | 0           | 1.426156051 | -3.09422854  | 0.43613341  | 1           | MIR665     |
| ENSG00000259845 | 0           | 1.426156051 | -3.09422854  | 0.43613341  | 1           | HERC2P10   |
| novel.442       | 40.62572378 | 30.26778003 | 0.423676505  | 0.436183763 | 0.561471091 | -          |
| ENSG00000188163 | 5.76180359  | 2.355289417 | 1.269755342  | 0.436191685 | 0.561471091 | FAM166A    |
| ENSG00000260750 | 2.451732174 | 0.723690511 | 1.76299105   | 0.436193084 | 0.561471091 | AC092720.1 |
| ENSG00000260891 | 3.033199274 | 1.467450118 | 1.062022123  | 0.436291269 | 0.56155201  | AC020978.3 |
| ENSG00000204084 | 389.6649398 | 330.3545048 | 0.23859121   | 0.436299176 | 0.56155201  | INPP5B     |
| ENSG00000226609 | 2.139615324 | 0.672939833 | 1.627119365  | 0.436358397 | 0.561600412 | AL390067.1 |
| ENSG00000272024 | 4.893435157 | 2.42610919  | 0.992624061  | 0.436592023 | 0.561873259 | AC064807.4 |
| ENSG00000185963 | 1473.771047 | 1627.453712 | -0.142996033 | 0.436650254 | 0.561894204 | BICD2      |
| ENSG00000008988 | 9084.667898 | 10281.19551 | -0.178513518 | 0.436651552 | 0.561894204 | RPS20      |
| ENSG00000151136 | 40.17577579 | 59.48917577 | -0.566232228 | 0.43675022  | 0.561990224 | BTBD11     |
| ENSG00000228274 | 31.25419714 | 41.00729944 | -0.387729345 | 0.436769431 | 0.561990224 | AL021707.2 |
| novel.257       | 1.481319294 | 0           | 2.902634853  | 0.436798171 | 1           | -          |
| ENSG00000156194 | 1.481319294 | 0           | 2.902634853  | 0.436798171 | 1           | PPEF2      |
| ENSG00000253649 | 1.481319294 | 0           | 2.902634853  | 0.436798171 | 1           | PRSS51     |
| ENSG00000263142 | 1.481319294 | 0           | 2.902634853  | 0.436798171 | 1           | LRRC37A17P |
| ENSG00000268618 | 1.481319294 | 0           | 2.902634853  | 0.436798171 | 1           | AC092316.1 |
| ENSG00000278480 | 1.481319294 | 0           | 2.902634853  | 0.436798171 | 1           | AL391094.1 |
| ENSG00000254325 | 1.481319294 | 0           | 2.902634853  | 0.436798171 | 1           | AC018607.1 |
| ENSG00000256171 | 1.481319294 | 0           | 2.902634853  | 0.436798171 | 1           | GCSHP4     |
| ENSG00000274954 | 1.481319294 | 0           | 2.902634853  | 0.436798171 | 1           | AC090971.5 |
| ENSG00000162621 | 1.481319294 | 0           | 2.902634853  | 0.436798171 | 1           | LRRC53     |
| ENSG00000255115 | 1.481319294 | 0           | 2.902634853  | 0.436798171 | 1           | AP002812.4 |
| ENSG00000235872 | 1.481319294 | 0           | 2.902634853  | 0.436798171 | 1           | AC078777.1 |
| ENSG00000283337 | 1.481319294 | 0           | 2.902634853  | 0.436798171 | 1           | RF00026    |
| ENSG00000257835 | 1.481319294 | 0           | 2.902634853  | 0.436798171 | 1           | AC073591.1 |
| ENSG00000227394 | 1.481319294 | 0           | 2.902634853  | 0.436798171 | 1           | AC007386.1 |
| ENSG00000233204 | 1.481319294 | 0           | 2.902634853  | 0.436798171 | 1           | MAPRE1P3   |
| ENSG00000266052 | 1.481319294 | 0           | 2.902634853  | 0.436798171 | 1           | MIR4500    |
| ENSG00000141458 | 1020.342282 | 1275.001234 | -0.321202777 | 0.436919241 | 0.562155144 | NPC1       |
| ENSG00000261124 | 0.909952655 | 2.882993683 | -1.664113051 | 0.436977174 | 0.56220184  | AC135050.4 |
| ENSG00000182220 | 3459.002409 | 4033.439076 | -0.221596555 | 0.437048316 | 0.562265526 | ATP6AP2    |
| ENSG00000240216 | 1.480065645 | 0           | 2.901498176  | 0.437066783 | 1           | CPHL1P     |
| ENSG00000197734 | 1.480065645 | 0           | 2.901498176  | 0.437066783 | 1           | C14orf178  |
| ENSG00000287463 | 1.480065645 | 0           | 2.901498176  | 0.437066783 | 1           | AC110620.2 |
| ENSG00000200237 | 1.480065645 | 0           | 2.901498176  | 0.437066783 | 1           | RF00156    |
| ENSG00000229782 | 1.480065645 | 0           | 2.901498176  | 0.437066783 | 1           | AC118754.2 |
| ENSG00000286501 | 1.480065645 | 0           | 2.901498176  | 0.437066783 | 1           | AC018545.1 |

|                 |             |             |              |             |             |            |
|-----------------|-------------|-------------|--------------|-------------|-------------|------------|
| ENSG00000275248 | 1.480065645 | 0           | 2.901498176  | 0.437066783 | 1           | AL355810.1 |
| ENSG00000188629 | 1.480065645 | 0           | 2.901498176  | 0.437066783 | 1           | ZNF177     |
| ENSG00000233930 | 1.480065645 | 0           | 2.901498176  | 0.437066783 | 1           | KRTAP5-AS1 |
| ENSG00000226963 | 1.480065645 | 0           | 2.901498176  | 0.437066783 | 1           | AC078883.2 |
| ENSG00000207642 | 1.480065645 | 0           | 2.901498176  | 0.437066783 | 1           | MIR571     |
| ENSG00000227910 | 1.480065645 | 0           | 2.901498176  | 0.437066783 | 1           | AC092634.4 |
| ENSG00000223446 | 1.480065645 | 0           | 2.901498176  | 0.437066783 | 1           | AL451065.1 |
| ENSG00000274589 | 1.480065645 | 0           | 2.901498176  | 0.437066783 | 1           | RF00017    |
| ENSG00000279036 | 1.480065645 | 0           | 2.901498176  | 0.437066783 | 1           | AC015656.1 |
| ENSG00000228213 | 1.480065645 | 0           | 2.901498176  | 0.437066783 | 1           | NLGN1-AS1  |
| ENSG00000248692 | 1.480065645 | 0           | 2.901498176  | 0.437066783 | 1           | ADGRL3-AS1 |
| ENSG00000239917 | 1.480065645 | 0           | 2.901498176  | 0.437066783 | 1           | RPS10P16   |
| ENSG00000232086 | 1.480065645 | 0           | 2.901498176  | 0.437066783 | 1           | AL159990.2 |
| ENSG00000231081 | 1.480065645 | 0           | 2.901498176  | 0.437066783 | 1           | AL078587.1 |
| ENSG00000236713 | 1.480065645 | 0           | 2.901498176  | 0.437066783 | 1           | AL356292.1 |
| ENSG00000199075 | 1.480065645 | 0           | 2.901498176  | 0.437066783 | 1           | MIR26A1    |
| ENSG00000239946 | 1.480065645 | 0           | 2.901498176  | 0.437066783 | 1           | ZBTB20-AS3 |
| ENSG00000226770 | 1.480065645 | 0           | 2.901498176  | 0.437066783 | 1           | AC000124.1 |
| ENSG00000230899 | 1.480065645 | 0           | 2.901498176  | 0.437066783 | 1           | MAGEA8-AS1 |
| ENSG00000254878 | 1.480065645 | 0           | 2.901498176  | 0.437066783 | 1           | AC103794.1 |
| ENSG00000255314 | 1.480065645 | 0           | 2.901498176  | 0.437066783 | 1           | AC024475.4 |
| ENSG00000279836 | 1.480065645 | 0           | 2.901498176  | 0.437066783 | 1           | AP002967.1 |
| ENSG00000165805 | 1.480065645 | 0           | 2.901498176  | 0.437066783 | 1           | C12orf50   |
| ENSG00000071082 | 10447.44942 | 12313.51782 | -0.237097249 | 0.437329983 | 0.562600033 | RPL31      |
| ENSG00000249753 | 5.026678631 | 1.844058227 | 1.457463931  | 0.437361199 | 0.562608316 | AC084357.2 |
| ENSG00000119632 | 58.37698053 | 83.76815374 | -0.518770798 | 0.43737973  | 0.562608316 | IFI27L2    |
| ENSG00000260661 | 2.081662396 | 0.743759607 | 1.512719183  | 0.437488028 | 0.562719761 | AC116903.2 |
| ENSG00000245281 | 13.18881444 | 6.553481185 | 1.000057649  | 0.437658272 | 0.562899463 | AC124242.1 |
| ENSG00000179284 | 0.89358395  | 2.832243005 | -1.660682269 | 0.437671107 | 0.562899463 | DAND5      |
| ENSG00000261221 | 703.7267224 | 613.1333444 | 0.199135068  | 0.437792235 | 0.563027425 | ZNF865     |
| ENSG00000108021 | 937.3782732 | 1088.368861 | -0.2155839   | 0.437980244 | 0.563241336 | TASOR2     |
| ENSG00000231666 | 0.308355904 | 1.487519214 | -2.185103199 | 0.437985528 | 1           | LINC01704  |
| ENSG00000234693 | 0.308355904 | 1.487519214 | -2.185103199 | 0.437985528 | 1           | AL353653.1 |
| ENSG00000224034 | 0.307102255 | 1.487519214 | -2.185106115 | 0.438067207 | 1           | LINC02561  |
| ENSG00000286337 | 2.714742909 | 5.899326178 | -1.113702388 | 0.438167957 | 0.563397283 | AC025370.2 |
| ENSG00000244687 | 49.9980768  | 69.07790267 | -0.464121965 | 0.438171622 | 0.563397283 | UBE2V1     |
| ENSG00000236431 | 1.525410814 | 3.688116453 | -1.270604628 | 0.438185491 | 0.563397283 | AC009237.8 |
| ENSG00000196422 | 595.4869027 | 512.1558401 | 0.217888881  | 0.438188249 | 0.563397283 | PPP1R26    |
| novel.1067      | 16.08973916 | 10.82352021 | 0.573377728  | 0.43825493  | 0.56343716  | -          |
| ENSG00000152076 | 77.76092095 | 98.91947979 | -0.346949125 | 0.438262636 | 0.56343716  | CCDC74B    |
| ENSG00000267114 | 3.928036872 | 6.379875787 | -0.704132627 | 0.438404018 | 0.563591033 | AC011481.1 |
| novel.620       | 5.351403239 | 9.193205571 | -0.778380758 | 0.438430251 | 0.563596871 | -          |
| ENSG00000139344 | 7.327544977 | 3.781445468 | 0.936990945  | 0.438527962 | 0.563694586 | AMDHD1     |
| ENSG00000213250 | 28.20874612 | 35.86491389 | -0.350134127 | 0.438571443 | 0.563722587 | RBMS2P1    |
| ENSG00000255474 | 5.151360026 | 1.90542139  | 1.452764339  | 0.438609935 | 0.563744174 | GAU1       |
| ENSG00000265386 | 0.879722543 | 2.547679642 | -1.515122487 | 0.438638374 | 0.56374559  | RN7SL219P  |
| ENSG00000198496 | 101.0774574 | 126.5272095 | -0.322616347 | 0.438661998 | 0.56374559  | NBR2       |
| ENSG00000261777 | 15.85040556 | 9.733962468 | 0.696788161  | 0.438676132 | 0.56374559  | AC012184.3 |
| ENSG00000086506 | 0.615458159 | 1.753169357 | -1.529482991 | 0.438681259 | 1           | HBQ1       |
| ENSG00000239254 | 0.586481695 | 2.406040094 | -2.029910672 | 0.438750927 | 0.563753884 | AC009220.2 |
| ENSG00000268015 | 0.586481695 | 2.406040094 | -2.029910672 | 0.438750927 | 0.563753884 | AC010320.2 |

|                 |             |             |              |             |             |            |
|-----------------|-------------|-------------|--------------|-------------|-------------|------------|
| ENSG00000118369 | 427.896342  | 490.0843474 | -0.195327009 | 0.438765546 | 0.563753884 | USP35      |
| ENSG00000259308 | 2.361041837 | 0.693008929 | 1.754172101  | 0.438784772 | 0.563753884 | AC024270.1 |
| ENSG00000196187 | 720.5796382 | 864.0455626 | -0.261644417 | 0.43879108  | 0.563753884 | TMEM63A    |
| novel.414       | 58.43460564 | 90.53486461 | -0.631796965 | 0.438880887 | 0.563812203 | -          |
| ENSG00000169515 | 354.7873391 | 568.1449395 | -0.679599934 | 0.438895189 | 0.563812203 | CCDC8      |
| ENSG00000275140 | 2.932408476 | 0.693008929 | 2.070218941  | 0.438901575 | 0.563812203 | SEC22B3    |
| ENSG00000198130 | 351.2499184 | 305.8388548 | 0.199437929  | 0.4389557   | 0.563853854 | HIBCH      |
| ENSG00000241764 | 29.19176676 | 38.29217896 | -0.395096154 | 0.439042094 | 0.563936948 | AC002467.1 |
| ENSG00000071909 | 2.773949485 | 0.672939833 | 2.014516648  | 0.439109169 | 0.56399522  | MYO3B      |
| ENSG00000278341 | 8.768533697 | 12.62628437 | -0.523483564 | 0.439148558 | 0.564017929 | AC138028.6 |
| ENSG00000267549 | 3.975889338 | 1.722487775 | 1.184713025  | 0.439191525 | 0.564045231 | AC006116.8 |
| ENSG00000197037 | 304.1459001 | 260.9954592 | 0.221145526  | 0.439220736 | 0.564054864 | ZSCAN25    |
| novel.964       | 13.23423088 | 5.003186144 | 1.411439096  | 0.439364006 | 0.564210965 | -          |
| ENSG00000279792 | 9.985659878 | 5.573468747 | 0.85177724   | 0.439433288 | 0.564272043 | AC015909.5 |
| ENSG00000185950 | 1133.949499 | 1406.090779 | -0.310543139 | 0.439467088 | 0.564287557 | IRS2       |
| ENSG00000228031 | 2.34592678  | 0.387220594 | 2.604500711  | 0.439509523 | 0.564314155 | AC078842.1 |
| ENSG00000203730 | 2.744973021 | 0.713078025 | 1.939994539  | 0.439665412 | 0.564479473 | TEDDM1     |
| ENSG00000138660 | 364.4772682 | 304.8107758 | 0.258531881  | 0.439681733 | 0.564479473 | AP1AR      |
| ENSG00000143889 | 707.0536017 | 799.396432  | -0.177448685 | 0.439724371 | 0.564506319 | HNRNPLL    |
| ENSG00000260470 | 2.755073482 | 1.130980201 | 1.310152956  | 0.439963577 | 0.564785498 | AC023794.6 |
| ENSG00000284602 | 28.98015597 | 20.75231305 | 0.477059343  | 0.440264172 | 0.565134366 | AL031432.4 |
| ENSG00000101782 | 1256.303046 | 1448.986254 | -0.205605739 | 0.440278846 | 0.565134366 | RIOK3      |
| ENSG00000128789 | 955.8572155 | 1076.874855 | -0.172069488 | 0.440502144 | 0.565393054 | PSMG2      |
| ENSG00000180066 | 0.61420451  | 2.475703993 | -2.018950493 | 0.440647717 | 0.56555196  | C10orf91   |
| ENSG00000256950 | 2.73619748  | 0.713078025 | 1.935770436  | 0.440715995 | 0.565611651 | AC069503.2 |
| ENSG00000273204 | 0.308355904 | 1.518200796 | -2.210884639 | 0.44074176  | 1           | AC104506.1 |
| ENSG00000256312 | 0.308355904 | 1.518200796 | -2.210884639 | 0.44074176  | 1           | AC138466.1 |
| ENSG00000162687 | 110.9945494 | 202.9831214 | -0.871445738 | 0.440795539 | 0.565685794 | KCNT2      |
| ENSG00000260194 | 0.307102255 | 1.518200796 | -2.210888827 | 0.440819056 | 1           | AC007496.1 |
| ENSG00000263388 | 0.307102255 | 1.518200796 | -2.210888827 | 0.440819056 | 1           | AC002347.2 |
| ENSG00000226953 | 11.78661791 | 20.53998212 | -0.805763274 | 0.440829108 | 0.565692993 | NCKAP5-AS2 |
| ENSG00000248503 | 9.704955518 | 6.470764656 | 0.584883386  | 0.440844696 | 0.565692993 | AL356235.1 |
| ENSG00000128524 | 1345.322808 | 1563.764223 | -0.216979405 | 0.440914349 | 0.565737252 | ATP6V1F    |
| ENSG00000271161 | 4.119233273 | 8.723268448 | -1.074557377 | 0.440922736 | 0.565737252 | BOLA2P2    |
| ENSG00000235169 | 15.30210314 | 9.651245939 | 0.662023021  | 0.441040505 | 0.565860413 | SMIM1      |
| ENSG00000255330 | 2.109385211 | 0.672939833 | 1.609891777  | 0.441083445 | 0.56588756  | AL096711.2 |
| ENSG00000002919 | 459.4610311 | 410.3084422 | 0.162764035  | 0.441175556 | 0.565977786 | SNX11      |
| ENSG00000250645 | 1.801029308 | 4.972504562 | -1.454675237 | 0.441294118 | 0.566101934 | AC010442.3 |
| novel.463       | 35.75840179 | 24.20302079 | 0.565679484  | 0.441418083 | 0.566233002 | -          |
| ENSG00000112394 | 1.536764924 | 3.689272328 | -1.2627736   | 0.441444746 | 0.566239247 | SLC16A10   |
| ENSG00000258608 | 2.096777453 | 4.179278547 | -0.999862114 | 0.441498011 | 0.566279612 | DNAJC19P9  |
| ENSG00000275506 | 0.293240848 | 1.518200796 | -2.210935223 | 0.441677455 | 1           | AC010378.1 |
| ENSG00000280164 | 0.293240848 | 1.518200796 | -2.210935223 | 0.441677455 | 1           | CU638689.5 |
| ENSG00000274902 | 1.522903516 | 3.169868797 | -1.068211054 | 0.441795152 | 0.566632761 | AC004241.2 |
| ENSG00000103067 | 2.682005499 | 5.900610448 | -1.139065948 | 0.441931063 | 0.566779097 | ESRP2      |
| ENSG00000276384 | 5.968115047 | 3.139187216 | 0.91753622   | 0.442039871 | 0.566890661 | AC016876.3 |
| ENSG00000132749 | 9.784363016 | 14.87891655 | -0.610682934 | 0.442144397 | 0.566976614 | TESMIN     |
| ENSG00000271199 | 5.041793687 | 2.496928964 | 1.01577815   | 0.44215054  | 0.566976614 | AL353804.2 |
| ENSG00000171612 | 278.1561059 | 222.4211698 | 0.321682874  | 0.442408379 | 0.567279247 | SLC25A33   |
| ENSG00000112159 | 1238.550509 | 1052.396795 | 0.23486403   | 0.442456745 | 0.567292786 | MDN1       |
| ENSG00000226889 | 1.54052587  | 3.689272328 | -1.2602523   | 0.442462608 | 0.567292786 | AL359541.1 |

|                 |             |             |              |             |             |            |
|-----------------|-------------|-------------|--------------|-------------|-------------|------------|
| ENSG00000248098 | 4.775022005 | 2.10970837  | 1.172750278  | 0.442544791 | 0.567370156 | BCKDHA     |
| ENSG00000268895 | 60.76907885 | 76.73399423 | -0.334289039 | 0.442673939 | 0.567507728 | A1BG-AS1   |
| ENSG00000261614 | 3.050821627 | 5.471967392 | -0.840787498 | 0.442720505 | 0.567539421 | YBX3P1     |
| ENSG00000185710 | 0.879722543 | 2.51699806  | -1.500780733 | 0.442796468 | 0.567608794 | SMG1P4     |
| ENSG00000225932 | 0.879722543 | 3.108505634 | -1.815689819 | 0.442820495 | 0.567611588 | CTAGE4     |
| ENSG00000151834 | 24.73018652 | 39.35177863 | -0.667799815 | 0.442950391 | 0.567717887 | GABRA2     |
| ENSG00000238039 | 11.68589839 | 5.512105584 | 1.089189162  | 0.442972102 | 0.567717887 | AC244197.2 |
| ENSG00000189431 | 31.78036116 | 90.82331515 | -1.514520778 | 0.442980547 | 0.567717887 | RASSF10    |
| ENSG0000011405  | 1227.528475 | 1104.840639 | 0.15207338   | 0.442990829 | 0.567717887 | PIK3C2A    |
| ENSG00000213714 | 4.733437783 | 1.742556871 | 1.434392515  | 0.443084314 | 0.567809686 | FAM209B    |
| ENSG00000287382 | 7.885050208 | 4.342143066 | 0.863831376  | 0.443186421 | 0.567912523 | AC110611.2 |
| ENSG00000109705 | 19.36742917 | 11.05733289 | 0.806234816  | 0.443328869 | 0.568067042 | NKX3-2     |
| ENSG00000138621 | 255.4428902 | 217.4241826 | 0.232054944  | 0.443355644 | 0.568073334 | PPCDC      |
| ENSG00000246763 | 64.1579883  | 87.63907509 | -0.448417486 | 0.443499522 | 0.568229661 | RGMB-AS1   |
| ENSG00000242866 | 2.987854105 | 1.029478846 | 1.518162292  | 0.443718197 | 0.568481802 | STRC       |
| ENSG00000204920 | 65.50753123 | 50.17581241 | 0.386387291  | 0.443752339 | 0.568486952 | ZNF155     |
| ENSG00000254536 | 17.16449032 | 22.76753653 | -0.408602068 | 0.443775234 | 0.568486952 | AL360181.3 |
| ENSG00000272138 | 8.714341717 | 4.717595299 | 0.889871402  | 0.443787859 | 0.568486952 | LINC01607  |
| ENSG00000272033 | 3.255879435 | 1.110911105 | 1.568204178  | 0.444076834 | 0.56882908  | AL136984.1 |
| ENSG00000214113 | 477.0345969 | 539.626695  | -0.178192152 | 0.444384992 | 0.569195745 | LYRM4      |
| ENSG00000151552 | 877.7348028 | 975.5091497 | -0.152292556 | 0.444522535 | 0.569343849 | QDPR       |
| ENSG00000066557 | 382.6427015 | 434.403797  | -0.182811456 | 0.444554119 | 0.569356235 | LRRC40     |
| ENSG00000137310 | 32.51612686 | 67.64927212 | -1.058058259 | 0.444633508 | 0.56942984  | TCF19      |
| ENSG00000286010 | 0.308355904 | 1.4981317   | -2.193939463 | 0.44486377  | 1           | AC108925.1 |
| ENSG00000236801 | 141.1190208 | 170.9441454 | -0.276738955 | 0.44502116  | 0.569898204 | RPL24P8    |
| ENSG00000126545 | 0.293240848 | 2.0188195   | -2.639255243 | 0.445042806 | 1           | CSN1S1     |
| ENSG00000048342 | 342.999812  | 413.6733166 | -0.270951884 | 0.445197333 | 0.570078561 | CC2D2A     |
| ENSG00000003436 | 1290.108598 | 2027.703764 | -0.652404366 | 0.445205881 | 0.570078561 | TFPI       |
| ENSG00000231991 | 2403.834111 | 2862.696545 | -0.25211605  | 0.445469624 | 0.570388168 | ANXA2P2    |
| ENSG00000286785 | 2.770188538 | 0.774441189 | 1.868589938  | 0.445610546 | 0.570540489 | LINC01622  |
| ENSG00000100038 | 5.186676005 | 8.396255142 | -0.692620589 | 0.445749689 | 0.570690517 | TOP3B      |
| ENSG00000205534 | 56.61438741 | 41.31907676 | 0.456655743  | 0.445927251 | 0.570886034 | SMG1P2     |
| ENSG00000273680 | 13.34609106 | 18.20219326 | -0.450265167 | 0.445946348 | 0.570886034 | AC009318.2 |
| ENSG00000152332 | 1800.432696 | 2006.22222  | -0.156252187 | 0.44602127  | 0.570953815 | UHMK1      |
| ENSG00000268746 | 3.373038938 | 6.154363836 | -0.870267339 | 0.446077307 | 0.570997415 | AC010519.1 |
| ENSG00000130021 | 284.2035423 | 341.7747512 | -0.265813089 | 0.446154881 | 0.571068576 | PUDP       |
| ENSG00000239524 | 2.947523532 | 1.080229524 | 1.454957803  | 0.446278599 | 0.571198792 | RPL32P34   |
| ENSG00000155254 | 3690.36026  | 3166.678425 | 0.220743734  | 0.446354657 | 0.571267997 | MARVELD1   |
| ENSG00000160201 | 182.4859681 | 243.6261981 | -0.415848113 | 0.446380665 | 0.571273143 | U2AF1      |
| ENSG00000089022 | 617.3075743 | 692.9399441 | -0.16659087  | 0.446512654 | 0.571394858 | MAPKAPK5   |
| ENSG00000197579 | 490.2766778 | 539.2251715 | -0.137293859 | 0.446519757 | 0.571394858 | TOPORS     |
| ENSG00000276030 | 3.328947419 | 1.4981317   | 1.175490958  | 0.446573446 | 0.571435417 | AC073534.2 |
| ENSG00000253704 | 18.26348808 | 12.28164211 | 0.564558026  | 0.446616024 | 0.571461755 | AC023632.2 |
| ENSG00000133302 | 177.6840337 | 211.5613986 | -0.252766131 | 0.446643653 | 0.571468962 | SLF1       |
| ENSG00000160408 | 10.2825904  | 15.78541228 | -0.613146806 | 0.446733988 | 0.571556396 | ST6GALNAC6 |
| ENSG00000276345 | 75.55254023 | 101.452309  | -0.4228955   | 0.446876274 | 0.571710285 | AC004556.1 |
| ENSG00000230216 | 3.325186472 | 1.4981317   | 1.174176594  | 0.446999058 | 0.571839211 | HSPB1P2    |
| ENSG00000230266 | 12.58721769 | 6.856829375 | 0.87573187   | 0.447048935 | 0.571874858 | XXYL1-AS2  |
| ENSG00000268660 | 2.743719372 | 1.10029862  | 1.328185663  | 0.447142779 | 0.571957734 | LETM1P2    |
| ENSG00000179038 | 2.34592678  | 5.828506405 | -1.30304732  | 0.44715775  | 0.571957734 | AP001885.1 |
| ENSG00000080345 | 1231.733159 | 1066.62883  | 0.207679002  | 0.447219602 | 0.572008688 | RIF1       |



|                 |             |             |              |             |             |                |
|-----------------|-------------|-------------|--------------|-------------|-------------|----------------|
| ENSG00000210156 | 7.264577455 | 3.82158366  | 0.914534171  | 0.447371413 | 0.572174692 | MT-TK          |
| ENSG00000144647 | 470.8542578 | 398.2475257 | 0.240814573  | 0.447408856 | 0.572194412 | POMGNT2        |
| ENSG00000160993 | 180.9200407 | 206.7100321 | -0.191619652 | 0.44743397  | 0.572198364 | ALKBH4         |
| ENSG00000271122 | 167.9587351 | 195.9736764 | -0.222245488 | 0.447456791 | 0.572199383 | AC018647.2     |
| ENSG00000143553 | 608.4254557 | 538.6792904 | 0.175140126  | 0.447499646 | 0.572226022 | SNAPIN         |
| ENSG00000146872 | 709.2663719 | 787.4015366 | -0.150995581 | 0.447527616 | 0.572233623 | TLK2           |
| ENSG00000124772 | 18.94685709 | 12.78914889 | 0.57062535   | 0.44756669  | 0.572233834 | CPNE5          |
| ENSG00000223697 | 8.100208478 | 4.075337048 | 1.001207666  | 0.447571831 | 0.572233834 | AF230666.1     |
| ENSG00000214300 | 76.70175521 | 90.31564562 | -0.236405096 | 0.447822363 | 0.572512417 | SPDYE3         |
| ENSG00000230224 | 15.6491087  | 10.25092585 | 0.617414919  | 0.447833796 | 0.572512417 | PHBP9          |
| ENSG00000184988 | 202.3133585 | 158.0605585 | 0.354478965  | 0.447913316 | 0.572585902 | TMEM106A       |
| ENSG00000279583 | 11.47575471 | 7.24404997  | 0.667212211  | 0.447971826 | 0.572632522 | AC009086.2     |
| ENSG00000227288 | 4.252761481 | 7.336094714 | -0.781738621 | 0.448074964 | 0.57272065  | AL138799.1     |
| ENSG00000247345 | 0.879722543 | 3.168712922 | -1.841177208 | 0.448084856 | 0.57272065  | AC092343.1     |
| ENSG00000235191 | 0           | 1.345879667 | -3.016659326 | 0.448139313 | 1           | NUCB1-AS1      |
| ENSG00000285908 | 0           | 1.345879667 | -3.016659326 | 0.448139313 | 1           | AC080128.2     |
| ENSG00000236857 | 0           | 1.345879667 | -3.016659326 | 0.448139313 | 1           | RAP1BP1        |
| ENSG00000249378 | 0           | 1.345879667 | -3.016659326 | 0.448139313 | 1           | LINC01060      |
| ENSG00000286533 | 0           | 1.345879667 | -3.016659326 | 0.448139313 | 1           | AL078604.4     |
| ENSG00000278517 | 0           | 1.345879667 | -3.016659326 | 0.448139313 | 1           | MIR6865        |
| ENSG00000278920 | 0           | 1.345879667 | -3.016659326 | 0.448139313 | 1           | AC005005.4     |
| ENSG00000216802 | 0           | 1.345879667 | -3.016659326 | 0.448139313 | 1           | AL590617.1     |
| ENSG00000176984 | 0           | 1.345879667 | -3.016659326 | 0.448139313 | 1           | AP000679.1     |
| ENSG00000229278 | 0           | 1.345879667 | -3.016659326 | 0.448139313 | 1           | AL133353.1     |
| ENSG00000237173 | 0           | 1.345879667 | -3.016659326 | 0.448139313 | 1           | AC099796.2     |
| ENSG00000215692 | 0           | 1.345879667 | -3.016659326 | 0.448139313 | 1           | AC114730.1     |
| ENSG00000250126 | 0           | 1.345879667 | -3.016659326 | 0.448139313 | 1           | AC116563.1     |
| ENSG00000226153 | 0           | 1.345879667 | -3.016659326 | 0.448139313 | 1           | Z93242.1       |
| ENSG00000286303 | 0           | 1.345879667 | -3.016659326 | 0.448139313 | 1           | AC007528.1     |
| ENSG00000260782 | 0           | 1.345879667 | -3.016659326 | 0.448139313 | 1           | AC007225.1     |
| ENSG00000215472 | 0           | 1.345879667 | -3.016659326 | 0.448139313 | 1           | RPL17-C18orf32 |
| ENSG00000266976 | 0           | 1.345879667 | -3.016659326 | 0.448139313 | 1           | AC079466.1     |
| ENSG00000268186 | 0           | 1.345879667 | -3.016659326 | 0.448139313 | 1           | ZNF114-AS1     |
| ENSG00000286130 | 0           | 1.345879667 | -3.016659326 | 0.448139313 | 1           | AC006040.1     |
| ENSG00000251940 | 0           | 1.345879667 | -3.016659326 | 0.448139313 | 1           | RF00398        |
| ENSG00000284959 | 9.307162927 | 5.73646166  | 0.699406884  | 0.448236443 | 0.572886218 | AC007262.2     |
| ENSG00000229780 | 5.75044948  | 3.220619475 | 0.835122503  | 0.448261769 | 0.572890404 | UBE2Q1-AS1     |
| ENSG00000214544 | 5.644644087 | 2.609042805 | 1.12981628   | 0.448343123 | 0.572966192 | GTF2IRD2P1     |
| ENSG00000272604 | 23.85519384 | 17.63191066 | 0.437853021  | 0.44852319  | 0.573168118 | AC073073.2     |
| ENSG00000108839 | 54.25230539 | 44.30947957 | 0.294258058  | 0.44868417  | 0.573345633 | ALOX12         |
| ENSG00000101391 | 443.692912  | 504.1438174 | -0.183965758 | 0.448751525 | 0.5734035   | CDK5RAP1       |
| ENSG00000187446 | 1157.34426  | 1282.658951 | -0.148291384 | 0.448820072 | 0.573457249 | CHP1           |
| ENSG00000267264 | 1.832513069 | 3.566546002 | -0.968363224 | 0.448839832 | 0.573457249 | AC006504.3     |
| ENSG00000151789 | 19.02250364 | 10.72214725 | 0.819678785  | 0.448859806 | 0.573457249 | ZNF385D        |
| ENSG00000187534 | 19.17336947 | 25.20297393 | -0.395169851 | 0.448921612 | 0.57350801  | PRR13P5        |
| ENSG00000263432 | 4.558610087 | 7.692633727 | -0.750438657 | 0.449120427 | 0.57373379  | RN7SL689P      |
| ENSG00000229816 | 4.792644359 | 8.375030171 | -0.798560885 | 0.449185792 | 0.573782452 | DDX50P1        |
| ENSG00000235560 | 16.57675498 | 11.18018761 | 0.559951441  | 0.449202689 | 0.573782452 | AC002310.1     |
| ENSG00000174640 | 153.8528719 | 237.3775843 | -0.626239063 | 0.449333722 | 0.573900046 | SLCO2A1        |
| ENSG00000250771 | 34.86706823 | 60.67522618 | -0.798357043 | 0.44933893  | 0.573900046 | AC106865.1     |
| ENSG00000179021 | 393.8880678 | 336.94544   | 0.224450863  | 0.449368253 | 0.573909285 | C3orf38        |

|                 |             |             |              |             |             |            |
|-----------------|-------------|-------------|--------------|-------------|-------------|------------|
| ENSG00000163795 | 544.4317833 | 476.4745961 | 0.192637543  | 0.449409259 | 0.573933442 | ZNF513     |
| ENSG00000139567 | 311.9151982 | 212.3634518 | 0.553846983  | 0.449448699 | 0.573955598 | ACVRL1     |
| ENSG00000036549 | 850.5217136 | 765.3833978 | 0.152414321  | 0.449749747 | 0.574311814 | AC118549.1 |
| ENSG00000173334 | 600.1910257 | 410.86539   | 0.547151634  | 0.449792827 | 0.574338598 | TRIB1      |
| ENSG00000196636 | 217.3114796 | 245.7579958 | -0.178156751 | 0.44999771  | 0.574571973 | SDHAF3     |
| ENSG00000118197 | 375.0361602 | 326.0792475 | 0.202029117  | 0.450084738 | 0.574654852 | DDX59      |
| ENSG00000198924 | 207.7211047 | 175.8584501 | 0.238954496  | 0.450107771 | 0.57465602  | DCLRE1A    |
| ENSG00000237973 | 838.7832896 | 716.9864277 | 0.226462972  | 0.450146785 | 0.574677589 | MTCO1P12   |
| ENSG00000168811 | 11.27452912 | 7.194455167 | 0.647429607  | 0.450264248 | 0.574799304 | IL12A      |
| ENSG00000160741 | 1038.278795 | 885.8732724 | 0.229398433  | 0.450365673 | 0.574896591 | CRTC2      |
| novel.171       | 4.7800366   | 2.527610546 | 0.926423035  | 0.450384712 | 0.574896591 | -          |
| ENSG00000163840 | 1152.847479 | 1312.843655 | -0.187768879 | 0.450475845 | 0.574984669 | DTX3L      |
| novel.321       | 2.654282684 | 5.767143241 | -1.111092944 | 0.450730846 | 0.575281888 | -          |
| ENSG00000273240 | 8.492915203 | 4.494523493 | 0.905768417  | 0.450834048 | 0.575385342 | AC013468.1 |
| ENSG00000180610 | 5.128723077 | 7.887464097 | -0.619754725 | 0.450877569 | 0.57541262  | ZBTB12BP   |
| ENSG00000247970 | 7.021696371 | 3.718798035 | 0.927970566  | 0.451091635 | 0.575657536 | AL160313.1 |
| ENSG00000082482 | 154.3508424 | 55.66267746 | 1.470901828  | 0.451160027 | 0.575716535 | KCNK2      |
| novel.432       | 113.3058023 | 76.31040703 | 0.569507934  | 0.451601805 | 0.576251976 | -          |
| ENSG00000167378 | 692.4476053 | 801.6832824 | -0.210902729 | 0.451741619 | 0.576402072 | IRGQ       |
| ENSG00000119943 | 399.8448725 | 351.9591424 | 0.184251523  | 0.451847608 | 0.576508996 | PYROXD2    |
| ENSG00000287494 | 2.714742909 | 0.774441189 | 1.841897448  | 0.452388379 | 0.577156866 | AC069368.2 |
| ENSG00000087302 | 2533.351087 | 2859.727538 | -0.174911196 | 0.452399814 | 0.577156866 | RTRAF      |
| ENSG00000200651 | 1.203193503 | 2.842855491 | -1.240666289 | 0.452470943 | 0.577219265 | RF00019    |
| ENSG00000255445 | 5.688735607 | 3.271370153 | 0.808395174  | 0.452551237 | 0.577293351 | AP003072.2 |
| ENSG00000284070 | 5.839886168 | 2.864080462 | 1.024503389  | 0.452656321 | 0.577399051 | AP000356.2 |
| ENSG00000163001 | 641.1668131 | 707.9578033 | -0.142758293 | 0.452766735 | 0.577511539 | CFAP36     |
| ENSG00000255642 | 69.74234219 | 56.28648922 | 0.308120006  | 0.452801552 | 0.577527595 | PABPC1P4   |
| ENSG00000116863 | 638.1307791 | 719.2952172 | -0.173055578 | 0.45308981  | 0.577866887 | ADPRHL2    |
| ENSG00000235298 | 7.50487997  | 4.697526203 | 0.68193752   | 0.453276016 | 0.578075995 | AL354733.3 |
| ENSG00000106484 | 2576.462568 | 1151.820172 | 1.161418308  | 0.453313632 | 0.57809559  | MEST       |
| ENSG00000264829 | 0.308355904 | 1.456837632 | -2.15959054  | 0.453348611 | 1           | AC087749.2 |
| ENSG00000279653 | 0.586481695 | 2.261960402 | -1.92607101  | 0.453368601 | 0.578137314 | AC004678.2 |
| ENSG00000185523 | 2.654282684 | 0.672939833 | 1.955912893  | 0.453480817 | 0.57825203  | SPATA45    |
| ENSG00000113319 | 305.7004404 | 190.2299286 | 0.684737091  | 0.453514158 | 0.578266163 | RASGRF2    |
| ENSG00000268945 | 1.188078446 | 2.893606169 | -1.273153406 | 0.453729071 | 0.578511802 | AC010422.2 |
| ENSG00000165325 | 1.229662669 | 2.92428775  | -1.251951471 | 0.453767313 | 0.57853217  | DEUP1      |
| ENSG00000279649 | 14.68127439 | 20.99429807 | -0.515262336 | 0.453966074 | 0.57875718  | AC020978.9 |
| ENSG00000237852 | 0.61420451  | 2.375358513 | -1.965171508 | 0.45402504  | 0.578778608 | AC119800.1 |
| novel.19        | 2.9928687   | 6.022180899 | -1.00808236  | 0.454027436 | 0.578778608 | -          |
| ENSG00000226706 | 7.87244245  | 5.054065216 | 0.642203426  | 0.454178445 | 0.578942704 | AL161452.1 |
| ENSG00000115844 | 110.0915933 | 83.94569316 | 0.393916069  | 0.454234032 | 0.578985153 | DLX2       |
| ENSG00000214188 | 0.293240848 | 1.456837632 | -2.15960336  | 0.454323877 | 1           | ST7-OT4    |
| ENSG00000225900 | 0.293240848 | 1.456837632 | -2.15960336  | 0.454323877 | 1           | HSPE1P13   |
| ENSG00000250699 | 0.293240848 | 1.456837632 | -2.15960336  | 0.454323877 | 1           | AP000892.1 |
| ENSG00000218313 | 0.293240848 | 1.456837632 | -2.15960336  | 0.454323877 | 1           | AL139274.1 |
| ENSG00000237436 | 10.57081665 | 7.25581833  | 0.549312223  | 0.454416899 | 0.579189829 | CAMTA1-DT  |
| ENSG00000267587 | 0.894837599 | 2.649180997 | -1.548338049 | 0.454600938 | 0.579395976 | AC090241.1 |
| ENSG00000107165 | 2.694613258 | 1.080229524 | 1.323381365  | 0.454645113 | 0.579423854 | TYRP1      |
| ENSG00000263740 | 6.565950852 | 3.300895859 | 1.001504102  | 0.454830858 | 0.579609187 | RN7SL4P    |
| ENSG00000216906 | 3.296210009 | 6.347909936 | -0.932979386 | 0.454835153 | 0.579609187 | AL355312.1 |
| ENSG00000144045 | 3.060922088 | 1.41669944  | 1.099968234  | 0.455057247 | 0.579863766 | DQX1       |

|                 |             |             |              |             |             |            |
|-----------------|-------------|-------------|--------------|-------------|-------------|------------|
| ENSG00000136689 | 62.21160596 | 37.32131916 | 0.7394989    | 0.45511137  | 0.579904292 | IL1RN      |
| ENSG00000177519 | 1.541779519 | 0           | 2.956859091  | 0.455119008 | 1           | RPRM       |
| ENSG00000224965 | 1.541779519 | 0           | 2.956859091  | 0.455119008 | 1           | LINC02586  |
| ENSG00000182156 | 1.541779519 | 0           | 2.956859091  | 0.455119008 | 1           | ENPP7      |
| ENSG00000214688 | 1.541779519 | 0           | 2.956859091  | 0.455119008 | 1           | C10orf105  |
| ENSG00000275708 | 1.541779519 | 0           | 2.956859091  | 0.455119008 | 1           | MIR3648-1  |
| ENSG00000211637 | 1.541779519 | 0           | 2.956859091  | 0.455119008 | 1           | IGLV4-69   |
| ENSG00000283036 | 1.541779519 | 0           | 2.956859091  | 0.455119008 | 1           | LINC01988  |
| ENSG00000131050 | 1.541779519 | 0           | 2.956859091  | 0.455119008 | 1           | BPIFA2     |
| ENSG00000164287 | 1.541779519 | 0           | 2.956859091  | 0.455119008 | 1           | CDC20B     |
| ENSG00000234819 | 1.541779519 | 0           | 2.956859091  | 0.455119008 | 1           | AL353705.4 |
| ENSG00000165383 | 1.541779519 | 0           | 2.956859091  | 0.455119008 | 1           | LRRC18     |
| ENSG00000229743 | 1.541779519 | 0           | 2.956859091  | 0.455119008 | 1           | LINC01159  |
| ENSG00000233977 | 1.541779519 | 0           | 2.956859091  | 0.455119008 | 1           | AC099681.3 |
| ENSG00000272783 | 1.541779519 | 0           | 2.956859091  | 0.455119008 | 1           | AC147067.2 |
| ENSG00000279942 | 1.541779519 | 0           | 2.956859091  | 0.455119008 | 1           | AL353597.3 |
| ENSG00000275830 | 1.541779519 | 0           | 2.956859091  | 0.455119008 | 1           | AL390755.1 |
| ENSG00000211782 | 1.541779519 | 0           | 2.956859091  | 0.455119008 | 1           | TRAV8-1    |
| ENSG00000245719 | 1.541779519 | 0           | 2.956859091  | 0.455119008 | 1           | AC009292.1 |
| ENSG00000128438 | 1.541779519 | 0           | 2.956859091  | 0.455119008 | 1           | TBC1D27P   |
| ENSG00000229914 | 1.541779519 | 0           | 2.956859091  | 0.455119008 | 1           | AL138899.2 |
| ENSG00000200610 | 1.541779519 | 0           | 2.956859091  | 0.455119008 | 1           | RF00019    |
| ENSG00000095981 | 1.541779519 | 0           | 2.956859091  | 0.455119008 | 1           | KCNK16     |
| ENSG00000253630 | 1.541779519 | 0           | 2.956859091  | 0.455119008 | 1           | AC026407.1 |
| ENSG00000120907 | 1.541779519 | 0           | 2.956859091  | 0.455119008 | 1           | ADRA1A     |
| ENSG00000288013 | 1.541779519 | 0           | 2.956859091  | 0.455119008 | 1           | AP003486.2 |
| ENSG00000256151 | 1.541779519 | 0           | 2.956859091  | 0.455119008 | 1           | ADGRD1-AS1 |
| ENSG00000201136 | 1.541779519 | 0           | 2.956859091  | 0.455119008 | 1           | RNU6-353P  |
| novel.450       | 1.541779519 | 0           | 2.956859091  | 0.455119008 | 1           | -          |
| ENSG00000236140 | 1.541779519 | 0           | 2.956859091  | 0.455119008 | 1           | AC245014.1 |
| ENSG00000232963 | 1.541779519 | 0           | 2.956859091  | 0.455119008 | 1           | HMG2P20    |
| ENSG00000235721 | 1.541779519 | 0           | 2.956859091  | 0.455119008 | 1           | AC013268.3 |
| ENSG00000228168 | 1.541779519 | 0           | 2.956859091  | 0.455119008 | 1           | HNRNPA1P21 |
| ENSG00000244720 | 1.541779519 | 0           | 2.956859091  | 0.455119008 | 1           | AC055748.1 |
| ENSG00000271715 | 1.541779519 | 0           | 2.956859091  | 0.455119008 | 1           | AC012640.3 |
| ENSG00000287591 | 1.541779519 | 0           | 2.956859091  | 0.455119008 | 1           | AL360169.3 |
| ENSG00000287927 | 1.541779519 | 0           | 2.956859091  | 0.455119008 | 1           | AC100801.2 |
| ENSG00000211791 | 1.541779519 | 0           | 2.956859091  | 0.455119008 | 1           | TRAV13-2   |
| ENSG00000274576 | 1.541779519 | 0           | 2.956859091  | 0.455119008 | 1           | IGHV2-70   |
| ENSG00000261265 | 1.541779519 | 0           | 2.956859091  | 0.455119008 | 1           | AC025271.2 |
| ENSG00000236481 | 1.541779519 | 0           | 2.956859091  | 0.455119008 | 1           | LINC02195  |
| ENSG00000261161 | 1.541779519 | 0           | 2.956859091  | 0.455119008 | 1           | AC009154.1 |
| ENSG00000286063 | 1.541779519 | 0           | 2.956859091  | 0.455119008 | 1           | AL121888.1 |
| ENSG00000286050 | 1.541779519 | 0           | 2.956859091  | 0.455119008 | 1           | AC012078.2 |
| ENSG00000227372 | 689.3700579 | 618.4123265 | 0.156784368  | 0.455157356 | 0.579926427 | TP73-AS1   |
| ENSG00000006757 | 287.6364713 | 253.6392142 | 0.1812024    | 0.455173385 | 0.579926427 | PNPLA4     |
| ENSG00000266074 | 509.1113343 | 603.8152757 | -0.24627735  | 0.455235765 | 0.579977463 | BAHCC1     |
| ENSG00000213214 | 12.43355983 | 8.438833479 | 0.549525454  | 0.455330471 | 0.580069676 | ARHGEF35   |
| ENSG00000146054 | 65.32246088 | 44.69156308 | 0.55133284   | 0.45539741  | 0.580126506 | TRIM7      |
| ENSG00000260874 | 2.109385211 | 3.913628404 | -0.892654561 | 0.455594963 | 0.580349713 | AC106820.5 |
| ENSG00000111850 | 176.0757117 | 152.8092571 | 0.205995664  | 0.45575163  | 0.580500232 | SMIM8      |

|                 |             |             |              |             |             |               |
|-----------------|-------------|-------------|--------------|-------------|-------------|---------------|
| ENSG00000276742 | 3.354162936 | 1.518200796 | 1.17085426   | 0.455757812 | 0.580500232 | AL731566.2    |
| ENSG00000130313 | 941.1227611 | 1070.530704 | -0.185702082 | 0.455822984 | 0.58054128  | AC010618.1    |
| ENSG00000197714 | 38.41805507 | 26.72600784 | 0.525224649  | 0.45583473  | 0.58054128  | ZNF460        |
| ENSG00000184905 | 1.535511275 | 0           | 2.951310139  | 0.455988268 | 1           | TCEAL2        |
| ENSG00000267708 | 1.535511275 | 0           | 2.951310139  | 0.455988268 | 1           | RDM1P3        |
| ENSG00000265158 | 1.535511275 | 0           | 2.951310139  | 0.455988268 | 1           | LRRC37A7P     |
| ENSG00000236459 | 1.535511275 | 0           | 2.951310139  | 0.455988268 | 1           | HNRNPA1P22    |
| ENSG00000283405 | 1.535511275 | 0           | 2.951310139  | 0.455988268 | 1           | AL121759.2    |
| ENSG00000144188 | 1.535511275 | 0           | 2.951310139  | 0.455988268 | 1           | TRIM43CP      |
| ENSG00000227117 | 1.535511275 | 0           | 2.951310139  | 0.455988268 | 1           | HORMAD2-AS1   |
| ENSG00000227265 | 1.535511275 | 0           | 2.951310139  | 0.455988268 | 1           | AL845331.1    |
| ENSG00000238034 | 1.535511275 | 0           | 2.951310139  | 0.455988268 | 1           | AL109807.1    |
| ENSG00000249834 | 1.535511275 | 0           | 2.951310139  | 0.455988268 | 1           | PGBD4P3       |
| ENSG00000230902 | 1.535511275 | 0           | 2.951310139  | 0.455988268 | 1           | FAM204CP      |
| novel.516       | 1.535511275 | 0           | 2.951310139  | 0.455988268 | 1           | -             |
| ENSG00000250540 | 1.535511275 | 0           | 2.951310139  | 0.455988268 | 1           | AC104685.1    |
| ENSG00000249086 | 1.535511275 | 0           | 2.951310139  | 0.455988268 | 1           | AC051649.1    |
| ENSG00000255484 | 1.535511275 | 0           | 2.951310139  | 0.455988268 | 1           | AP003063.2    |
| ENSG00000258144 | 1.535511275 | 0           | 2.951310139  | 0.455988268 | 1           | LINC02406     |
| ENSG00000181803 | 1.535511275 | 0           | 2.951310139  | 0.455988268 | 1           | OR6S1         |
| ENSG00000276393 | 1.535511275 | 0           | 2.951310139  | 0.455988268 | 1           | AC105429.2    |
| ENSG00000264693 | 1.535511275 | 0           | 2.951310139  | 0.455988268 | 1           | AC123786.1    |
| ENSG00000207455 | 1.535511275 | 0           | 2.951310139  | 0.455988268 | 1           | RNU6-331P     |
| novel.14        | 1.535511275 | 0           | 2.951310139  | 0.455988268 | 1           | -             |
| ENSG00000278966 | 2.741212075 | 1.00940975  | 1.406387675  | 0.456037609 | 0.580771194 | AL031602.1    |
| ENSG00000100228 | 144.2633686 | 171.0598893 | -0.244547371 | 0.456109205 | 0.580833901 | RAB36         |
| ENSG00000229291 | 2.751312536 | 1.060160428 | 1.365940005  | 0.456159782 | 0.580847028 | AL139161.1    |
| ENSG00000089094 | 546.4956652 | 486.1464591 | 0.169390571  | 0.456164226 | 0.580847028 | KDM2B         |
| ENSG00000287277 | 4.902281969 | 2.099095884 | 1.212221554  | 0.456201417 | 0.580847318 | AL392086.3    |
| ENSG00000275052 | 1431.214112 | 1300.80193  | 0.137642895  | 0.456209167 | 0.580847318 | PPP4R3B       |
| ENSG00000023572 | 658.0774249 | 567.4465929 | 0.213412761  | 0.456262668 | 0.580886969 | GLRX2         |
| ENSG00000155966 | 23.67431136 | 14.21530494 | 0.736995069  | 0.456326193 | 0.580939378 | AFF2          |
| ENSG00000248648 | 3.591958154 | 1.793307549 | 1.004941269  | 0.456382622 | 0.580982748 | AC113410.1    |
| ENSG00000142794 | 224.0391797 | 184.6588313 | 0.277421487  | 0.456508417 | 0.581114414 | NBPF3         |
| ENSG00000050426 | 828.2914674 | 914.7970646 | -0.143054368 | 0.456629797 | 0.581240447 | LETMD1        |
| ENSG00000188460 | 1.188078446 | 2.802717299 | -1.236206627 | 0.456666749 | 0.581259005 | ACTBP11       |
| novel.806       | 10.78744203 | 5.095359283 | 1.083378917  | 0.456705271 | 0.581279559 | -             |
| ENSG00000261140 | 3.89780676  | 1.874739808 | 1.079900661  | 0.456782485 | 0.581349356 | AC093525.4    |
| ENSG00000175764 | 115.0542642 | 136.4681559 | -0.246195483 | 0.456901199 | 0.581471959 | TTLL11        |
| ENSG00000285696 | 2.109385211 | 4.045811341 | -0.927902865 | 0.457000662 | 0.581570053 | AP002433.2    |
| ENSG00000196247 | 181.5500007 | 153.930314  | 0.236496301  | 0.457100153 | 0.581668172 | ZNF107        |
| ENSG00000163389 | 452.7045402 | 398.1357502 | 0.18495122   | 0.457176614 | 0.581736978 | POGLUT1       |
| ENSG00000270011 | 6.010952918 | 3.607840069 | 0.742006127  | 0.457317363 | 0.581887575 | ZNF559-ZNF177 |
| ENSG00000254907 | 0.879722543 | 2.537067156 | -1.511641241 | 0.457438355 | 0.581984762 | AC087276.2    |
| ENSG00000189007 | 298.5956646 | 259.6981128 | 0.201069976  | 0.457438544 | 0.581984762 | ADAT2         |
| ENSG00000196696 | 117.2463906 | 94.28665598 | 0.31635595   | 0.457545825 | 0.582092747 | AC009022.1    |
| ENSG00000244256 | 1.50778846  | 3.260757667 | -1.107834144 | 0.457635419 | 0.582178221 | RN7SL130P     |
| ENSG00000231104 | 3.323932824 | 1.487519214 | 1.178525536  | 0.457766505 | 0.582316469 | AC022395.1    |
| ENSG00000276926 | 1.466204238 | 3.842808631 | -1.384121309 | 0.457908384 | 0.582468431 | MIR6797       |
| ENSG00000186765 | 5.779425943 | 8.998375202 | -0.639709931 | 0.457939231 | 0.582479152 | FSCN2         |
| ENSG00000272148 | 11.49086977 | 15.49036483 | -0.428679716 | 0.457964243 | 0.582482449 | AC013403.2    |

|                 |             |             |              |             |             |            |
|-----------------|-------------|-------------|--------------|-------------|-------------|------------|
| ENSG00000229676 | 5.76180359  | 9.061022635 | -0.662965904 | 0.457997548 | 0.582496294 | ZNF492     |
| ENSG00000165646 | 6.918398275 | 4.259554931 | 0.695759589  | 0.458090594 | 0.582586114 | SLC18A2    |
| ENSG00000260942 | 79.90637724 | 66.50776097 | 0.266665059  | 0.458528846 | 0.583110407 | CAPN10-DT  |
| ENSG00000260037 | 4.761160598 | 1.813376645 | 1.397372312  | 0.458556931 | 0.583110407 | AC104938.1 |
| ENSG00000130227 | 1402.454101 | 1538.595161 | -0.133502223 | 0.45857018  | 0.583110407 | XPO7       |
| ENSG00000123999 | 33.15469233 | 24.7932441  | 0.424120902  | 0.458672105 | 0.583184083 | INHHA      |
| ENSG00000256060 | 87.68576425 | 106.378044  | -0.276907178 | 0.458673013 | 0.583184083 | TRAPPC2B   |
| ENSG00000176160 | 3.690241654 | 1.386017859 | 1.396039067  | 0.458746172 | 0.583248559 | HSF5       |
| ENSG00000148343 | 630.6071368 | 698.7346865 | -0.148051534 | 0.458929398 | 0.58345296  | MIGA2      |
| ENSG00000106133 | 53.45338619 | 41.5893504  | 0.363272236  | 0.458995841 | 0.583508879 | NSUN5P2    |
| ENSG00000078043 | 512.7137059 | 586.8321137 | -0.194264426 | 0.459064717 | 0.583567883 | PIAS2      |
| ENSG00000175215 | 4189.561345 | 3791.928391 | 0.143953937  | 0.45916416  | 0.583665739 | CTDSP2     |
| ENSG00000233084 | 3.60707321  | 1.426156051 | 1.336194284  | 0.459190314 | 0.583670428 | RPL23AP25  |
| ENSG00000207475 | 0.586481695 | 1.823989131 | -1.614204819 | 0.459321457 | 1           | SNORA80E   |
| ENSG00000172889 | 403.246089  | 317.8686104 | 0.344050643  | 0.459360317 | 0.583857952 | EGFL7      |
| ENSG00000272211 | 2.111892509 | 4.269011542 | -1.016904129 | 0.459398641 | 0.583863879 | AC114760.2 |
| ENSG00000254732 | 4.866965991 | 2.455634897 | 0.974661759  | 0.459444537 | 0.583863879 | AP001931.1 |
| ENSG00000228217 | 0.89358395  | 2.558292127 | -1.505865831 | 0.45946779  | 0.583863879 | PNRC2P1    |
| ENSG00000225439 | 122.3120318 | 103.9074771 | 0.235649299  | 0.459479492 | 0.583863879 | BOLA3-AS1  |
| ENSG00000182796 | 751.4936672 | 617.7646959 | 0.283205721  | 0.45948998  | 0.583863879 | TMEM198B   |
| ENSG00000109911 | 252.3340722 | 221.8252487 | 0.185138539  | 0.459516093 | 0.583863879 | ELP4       |
| ENSG00000287892 | 6.549582147 | 3.577158488 | 0.874917415  | 0.45952229  | 0.583863879 | AC090907.3 |
| ENSG00000235084 | 8.189573895 | 4.035198856 | 1.026663014  | 0.459592238 | 0.583924198 | CHCHD2P6   |
| ENSG00000279668 | 0.308355904 | 1.386017859 | -2.098201396 | 0.459700223 | 1           | AC024610.2 |
| ENSG00000235700 | 0.308355904 | 1.386017859 | -2.098201396 | 0.459700223 | 1           | CYCSP52    |
| ENSG00000171680 | 795.7331868 | 983.8019732 | -0.305781343 | 0.459755854 | 0.584103513 | PLEKHG5    |
| ENSG00000175229 | 6.770039745 | 2.659793482 | 1.359687832  | 0.459787277 | 0.584114872 | GAL3ST3    |
| ENSG00000126603 | 54.86944412 | 39.74760393 | 0.465569944  | 0.459913864 | 0.58424712  | GLIS2      |
| ENSG00000249655 | 1.186824798 | 2.842855491 | -1.253730768 | 0.459991391 | 0.584317035 | AC008434.1 |
| ENSG00000204070 | 453.3079166 | 402.4671524 | 0.171020635  | 0.460111142 | 0.584440578 | SYS1       |
| ENSG00000109445 | 612.7762434 | 688.0828926 | -0.167317117 | 0.460198598 | 0.58451528  | ZNF330     |
| ENSG00000102575 | 100.1021287 | 63.94659633 | 0.648111577  | 0.460214948 | 0.58451528  | ACP5       |
| ENSG00000064726 | 1544.334998 | 1768.939695 | -0.195935318 | 0.460263089 | 0.584547847 | BTBD1      |
| ENSG00000228352 | 1.188078446 | 2.842855491 | -1.252741637 | 0.460375102 | 0.584661527 | AL354989.1 |
| ENSG00000235994 | 5.955507288 | 1.936102971 | 1.638467691  | 0.460652348 | 0.584985026 | HGC6.3     |
| ENSG00000168878 | 0.293240848 | 1.386017859 | -2.098160516 | 0.460762795 | 1           | SFTPB      |
| novel.4         | 0.293240848 | 1.386017859 | -2.098160516 | 0.460762795 | 1           | -          |
| ENSG00000232693 | 0.293240848 | 1.386017859 | -2.098160516 | 0.460762795 | 1           | AC012370.1 |
| ENSG00000276436 | 0.293240848 | 1.386017859 | -2.098160516 | 0.460762795 | 1           | AL136301.1 |
| ENSG00000241461 | 0.293240848 | 1.386017859 | -2.098160516 | 0.460762795 | 1           | RN7SL182P  |
| ENSG00000241641 | 2.124500267 | 0.774441189 | 1.500266733  | 0.460835022 | 0.585159802 | RPS23P6    |
| ENSG00000266932 | 2.124500267 | 0.774441189 | 1.500266733  | 0.460835022 | 0.585159802 | AC006116.2 |
| ENSG00000255836 | 7.318769436 | 11.71020363 | -0.68259666  | 0.461052927 | 0.585407883 | AC131206.1 |
| ENSG00000280214 | 4.24398594  | 8.205020793 | -0.952242598 | 0.461100295 | 0.585439416 | AC027682.7 |
| ENSG00000197386 | 2544.171412 | 2197.217366 | 0.211666971  | 0.461216931 | 0.585558888 | HTT        |
| ENSG00000267060 | 1.833766717 | 4.595896454 | -1.318083171 | 0.461302636 | 0.585639081 | PTGES3L    |
| ENSG00000158270 | 3335.282715 | 1610.634752 | 1.050185262  | 0.461441141 | 0.585786294 | COLEC12    |
| ENSG00000102401 | 1738.808624 | 1521.104843 | 0.193063429  | 0.461474229 | 0.585792474 | ARMCX3     |
| ENSG00000075790 | 140.1583527 | 113.3705712 | 0.307249376  | 0.461491103 | 0.585792474 | BCAP29     |
| ENSG00000148339 | 360.6970909 | 406.6939708 | -0.173918389 | 0.461556866 | 0.585847327 | SLC25A25   |
| ENSG00000280332 | 46.32455985 | 34.89307379 | 0.412146661  | 0.46163344  | 0.585909095 | AC020917.4 |

|                 |             |             |              |             |             |            |
|-----------------|-------------|-------------|--------------|-------------|-------------|------------|
| ENSG00000265962 | 0.923814062 | 3.364699167 | -1.876471758 | 0.461650633 | 0.585909095 | GACAT2     |
| ENSG00000272411 | 5.223245632 | 1.90542139  | 1.469500815  | 0.461687469 | 0.585927224 | AC116312.1 |
| ENSG00000162068 | 1.526664462 | 3.475657132 | -1.198650054 | 0.461869687 | 0.586115779 | NTN3       |
| ENSG00000103351 | 328.9330988 | 367.009481  | -0.158483618 | 0.461881161 | 0.586115779 | CLUAP1     |
| ENSG00000087206 | 446.0300632 | 504.8255716 | -0.178545785 | 0.462288051 | 0.586567837 | UIMC1      |
| ENSG00000185238 | 313.7967631 | 379.567865  | -0.275260821 | 0.462296445 | 0.586567837 | PRMT3      |
| ENSG00000197982 | 990.1015446 | 1165.286085 | -0.235209571 | 0.462305131 | 0.586567837 | C1orf122   |
| ENSG00000223528 | 3.297463658 | 1.518200796 | 1.15072644   | 0.462347066 | 0.586592398 | AL359094.1 |
| ENSG00000240771 | 190.7341197 | 148.5594156 | 0.360276023  | 0.462385604 | 0.586612646 | ARHGEF25   |
| ENSG00000084090 | 1851.379771 | 2108.195466 | -0.187525804 | 0.462501651 | 0.58673122  | STARD7     |
| ENSG00000272810 | 5.233274822 | 2.099095884 | 1.307813719  | 0.462643408 | 0.586882397 | U91328.3   |
| ENSG00000234241 | 2.108131562 | 4.546430046 | -1.112458659 | 0.462671163 | 0.58688895  | AL109618.1 |
| ENSG00000287378 | 2.155984028 | 0.693008929 | 1.614027054  | 0.462937229 | 0.587197781 | AC129803.1 |
| ENSG00000231296 | 0.586481695 | 1.803920035 | -1.601201504 | 0.463005105 | 1           | AL050341.1 |
| ENSG00000282757 | 0.586481695 | 2.171071533 | -1.873030917 | 0.463083157 | 0.587354204 | DUXB       |
| ENSG00000233231 | 4.23263183  | 7.226292624 | -0.769002156 | 0.463249401 | 0.587488787 | HNRNPA1P49 |
| ENSG00000224106 | 2.113146158 | 0.693008929 | 1.588672277  | 0.463257102 | 0.587488787 | CYP4F25P   |
| ENSG00000251191 | 2.113146158 | 0.693008929 | 1.588672277  | 0.463257102 | 0.587488787 | LINC00589  |
| ENSG00000234279 | 0.586481695 | 2.292641984 | -1.944844822 | 0.463348731 | 0.587576308 | LINC01937  |
| ENSG00000260723 | 0.293240848 | 1.936102971 | -2.564977035 | 0.463441706 | 1           | AC007598.1 |
| ENSG00000188368 | 6.758685635 | 11.50707253 | -0.77062748  | 0.463711004 | 0.588007008 | PRR19      |
| ENSG00000152527 | 245.3635037 | 173.1424306 | 0.502299455  | 0.463787383 | 0.588075159 | PLEKHH2    |
| ENSG00000167536 | 45.51281943 | 36.24738259 | 0.329204378  | 0.463936766 | 0.588186455 | DHRS13     |
| ENSG00000170525 | 1993.323654 | 2392.165824 | -0.263038208 | 0.463946591 | 0.588186455 | PFKFB3     |
| ENSG00000162849 | 1.49643435  | 3.781445468 | -1.34160491  | 0.463956317 | 0.588186455 | KIF26B     |
| ENSG00000172716 | 1466.708637 | 1263.766762 | 0.214659522  | 0.463965713 | 0.588186455 | SLFN11     |
| ENSG00000204536 | 14.23458914 | 25.561054   | -0.84712643  | 0.464103933 | 0.588332974 | CCHCR1     |
| ENSG00000158516 | 4.309460759 | 1.345879667 | 1.658785892  | 0.464159796 | 0.588354174 | CPA2       |
| ENSG00000232564 | 4.175932552 | 2.10970837  | 0.978509261  | 0.464168196 | 0.588354174 | MRTFA-AS1  |
| ENSG00000287934 | 6.908297814 | 4.035198856 | 0.787013215  | 0.464190967 | 0.588354174 | AP001885.3 |
| ENSG00000143093 | 723.6426526 | 643.4521316 | 0.16926186   | 0.464211239 | 0.588354174 | STRIP1     |
| ENSG00000278705 | 0.308355904 | 1.406086955 | -2.115718147 | 0.464247653 | 1           | HIST1H4B   |
| ENSG00000271983 | 0.308355904 | 1.406086955 | -2.115718147 | 0.464247653 | 1           | AC023302.1 |
| ENSG00000229820 | 0.308355904 | 1.406086955 | -2.115718147 | 0.464247653 | 1           | CR391992.1 |
| ENSG00000260978 | 0.308355904 | 1.406086955 | -2.115718147 | 0.464247653 | 1           | AC126407.1 |
| ENSG00000236852 | 0.308355904 | 1.406086955 | -2.115718147 | 0.464247653 | 1           | BX322784.1 |
| ENSG00000268262 | 0.308355904 | 1.406086955 | -2.115718147 | 0.464247653 | 1           | AC011445.1 |
| ENSG00000243560 | 0.307102255 | 1.406086955 | -2.115716244 | 0.464331051 | 1           | RN7SL364P  |
| ENSG00000174448 | 9.287033275 | 5.198144908 | 0.828031498  | 0.464369139 | 0.58852559  | STARD6     |
| ENSG00000223956 | 2.742465724 | 1.00940975  | 1.408139386  | 0.464413272 | 0.588552813 | LINC01767  |
| novel.791       | 65.87036385 | 90.85940341 | -0.465925773 | 0.464462033 | 0.588585898 | -          |
| ENSG00000259258 | 0.586481695 | 1.854670712 | -1.634678611 | 0.464470499 | 1           | AC013553.1 |
| ENSG00000119396 | 1774.252829 | 2013.284309 | -0.182474655 | 0.464578212 | 0.58870441  | RAB14      |
| ENSG00000177374 | 1397.491839 | 878.3761613 | 0.669826978  | 0.464745355 | 0.588887489 | HIC1       |
| ENSG00000129691 | 789.7525628 | 877.253538  | -0.151944052 | 0.46479908  | 0.588910309 | ASH2L      |
| ENSG00000238090 | 0.61420451  | 2.261960402 | -1.878558604 | 0.464808699 | 0.588910309 | AC006195.1 |
| ENSG00000185745 | 2317.688196 | 1783.775364 | 0.377613555  | 0.465169084 | 0.589338176 | IFIT1      |
| ENSG00000249119 | 0.293240848 | 1.406086955 | -2.115695157 | 0.465257356 | 1           | MTND6P4    |
| ENSG00000265342 | 0.293240848 | 1.406086955 | -2.115695157 | 0.465257356 | 1           | AC011933.3 |
| ENSG00000266139 | 0.293240848 | 1.406086955 | -2.115695157 | 0.465257356 | 1           | MIR4435-2  |
| ENSG00000252707 | 0.293240848 | 1.406086955 | -2.115695157 | 0.465257356 | 1           | RNU11-2P   |

|                 |             |             |              |             |             |            |
|-----------------|-------------|-------------|--------------|-------------|-------------|------------|
| ENSG00000244313 | 1388.056719 | 1628.049626 | -0.230092864 | 0.4652711   | 0.58943868  | AC024293.1 |
| ENSG00000249853 | 6.081513603 | 8.95823701  | -0.56148456  | 0.465466183 | 0.589657073 | HS3ST5     |
| ENSG00000104332 | 2255.738597 | 3012.352309 | -0.417285726 | 0.465541289 | 0.589689326 | SFRP1      |
| ENSG00000214353 | 6.747331526 | 10.93447817 | -0.696685893 | 0.465541414 | 0.589689326 | VAC14-AS1  |
| ENSG00000251666 | 2.73619748  | 5.502648973 | -1.004526172 | 0.465559734 | 0.589689326 | ZNF346-IT1 |
| ENSG00000034693 | 233.0880617 | 264.0344765 | -0.180571665 | 0.465618887 | 0.5897355   | PEX3       |
| ENSG00000136536 | 1213.293214 | 1350.086902 | -0.15424471  | 0.46564758  | 0.589743092 | 7-Mar      |
| ENSG00000090674 | 496.1882789 | 428.0265841 | 0.21296585   | 0.465714354 | 0.589798909 | MCOLN1     |
| ENSG00000141506 | 405.7783398 | 188.9340293 | 1.103027676  | 0.465751164 | 0.589816777 | PIK3R5     |
| ENSG00000249138 | 1.466204238 | 0           | 2.888479711  | 0.4658956   | 1           | SLED1      |
| ENSG00000239519 | 1.466204238 | 0           | 2.888479711  | 0.4658956   | 1           | CADM2-AS1  |
| ENSG00000230053 | 1.466204238 | 0           | 2.888479711  | 0.4658956   | 1           | AC093578.1 |
| ENSG00000278095 | 1.466204238 | 0           | 2.888479711  | 0.4658956   | 1           | AC022509.4 |
| ENSG00000223694 | 1.466204238 | 0           | 2.888479711  | 0.4658956   | 1           | ADH5P3     |
| ENSG00000196778 | 1.466204238 | 0           | 2.888479711  | 0.4658956   | 1           | OR52K1     |
| ENSG00000262477 | 1.466204238 | 0           | 2.888479711  | 0.4658956   | 1           | AC021224.1 |
| ENSG00000284745 | 1.466204238 | 0           | 2.888479711  | 0.4658956   | 1           | AL589702.1 |
| ENSG00000188771 | 1.466204238 | 0           | 2.888479711  | 0.4658956   | 1           | PLET1      |
| ENSG00000133980 | 1.466204238 | 0           | 2.888479711  | 0.4658956   | 1           | VRTN       |
| ENSG00000228809 | 1.466204238 | 0           | 2.888479711  | 0.4658956   | 1           | AL034428.1 |
| novel.273       | 1.466204238 | 0           | 2.888479711  | 0.4658956   | 1           | -          |
| ENSG00000228999 | 1.466204238 | 0           | 2.888479711  | 0.4658956   | 1           | AC096570.1 |
| ENSG00000252892 | 1.466204238 | 0           | 2.888479711  | 0.4658956   | 1           | RNU6-548P  |
| ENSG00000201433 | 1.466204238 | 0           | 2.888479711  | 0.4658956   | 1           | RNU6-335P  |
| ENSG00000207367 | 1.466204238 | 0           | 2.888479711  | 0.4658956   | 1           | RNU6-29P   |
| ENSG00000235151 | 1.466204238 | 0           | 2.888479711  | 0.4658956   | 1           | AC131097.3 |
| ENSG00000256739 | 1.466204238 | 0           | 2.888479711  | 0.4658956   | 1           | AP002892.2 |
| ENSG00000276070 | 1.466204238 | 0           | 2.888479711  | 0.4658956   | 1           | CCL4L2     |
| ENSG00000228392 | 1.466204238 | 0           | 2.888479711  | 0.4658956   | 1           | AL162391.1 |
| ENSG00000277942 | 1.466204238 | 0           | 2.888479711  | 0.4658956   | 1           | MIR8075    |
| ENSG00000274215 | 1.466204238 | 0           | 2.888479711  | 0.4658956   | 1           | AC106028.4 |
| ENSG00000267766 | 1.466204238 | 0           | 2.888479711  | 0.4658956   | 1           | AC022726.1 |
| ENSG00000252826 | 1.466204238 | 0           | 2.888479711  | 0.4658956   | 1           | RNU1-92P   |
| ENSG00000225338 | 1.466204238 | 0           | 2.888479711  | 0.4658956   | 1           | RPL23AP18  |
| ENSG00000251889 | 1.466204238 | 0           | 2.888479711  | 0.4658956   | 1           | RNU4-49P   |
| ENSG00000283058 | 1.466204238 | 0           | 2.888479711  | 0.4658956   | 1           | AC009234.1 |
| ENSG00000251019 | 1.466204238 | 0           | 2.888479711  | 0.4658956   | 1           | HIGD1AP13  |
| ENSG00000250345 | 1.466204238 | 0           | 2.888479711  | 0.4658956   | 1           | AC104090.1 |
| ENSG00000237810 | 1.466204238 | 0           | 2.888479711  | 0.4658956   | 1           | AC104852.1 |
| ENSG00000254050 | 1.466204238 | 0           | 2.888479711  | 0.4658956   | 1           | AC018861.2 |
| ENSG00000197353 | 1.466204238 | 0           | 2.888479711  | 0.4658956   | 1           | LYPD2      |
| ENSG00000286718 | 1.466204238 | 0           | 2.888479711  | 0.4658956   | 1           | AC007066.3 |
| ENSG00000254707 | 1.466204238 | 0           | 2.888479711  | 0.4658956   | 1           | AC104237.1 |
| ENSG00000254566 | 1.466204238 | 0           | 2.888479711  | 0.4658956   | 1           | AC087277.1 |
| ENSG00000207583 | 1.466204238 | 0           | 2.888479711  | 0.4658956   | 1           | MIR606     |
| ENSG00000279746 | 1.466204238 | 0           | 2.888479711  | 0.4658956   | 1           | AC092850.1 |
| ENSG00000223336 | 1.466204238 | 0           | 2.888479711  | 0.4658956   | 1           | RNU2-6P    |
| ENSG00000259361 | 1.466204238 | 0           | 2.888479711  | 0.4658956   | 1           | LINC00927  |
| novel.252       | 1.466204238 | 0           | 2.888479711  | 0.4658956   | 1           | -          |
| ENSG00000286423 | 3.688988006 | 1.386017859 | 1.396092747  | 0.466006865 | 0.590111827 | AC004817.5 |
| ENSG00000287760 | 6.329409282 | 3.392940604 | 0.918731865  | 0.466158645 | 0.590275259 | AC099521.3 |

|                 |             |             |              |             |             |            |
|-----------------|-------------|-------------|--------------|-------------|-------------|------------|
| ENSG00000213693 | 20.52617515 | 26.67170832 | -0.379626258 | 0.466216368 | 0.590319579 | SEC14L1P1  |
| ENSG00000246174 | 71.54914154 | 60.77857256 | 0.236755567  | 0.466250505 | 0.590334034 | KCTD21-AS1 |
| ENSG00000224031 | 2.094270155 | 0.693008929 | 1.577706806  | 0.466317835 | 0.590361742 | TCEAL3-AS1 |
| ENSG00000238482 | 2.094270155 | 0.693008929 | 1.577706806  | 0.466317835 | 0.590361742 | RNU6-1208P |
| ENSG00000171051 | 287.3525747 | 207.5617019 | 0.470024946  | 0.466362842 | 0.590389953 | FPR1       |
| ENSG00000204188 | 0.307102255 | 1.396630344 | -2.106781405 | 0.466521026 | 1           | GGNBP1     |
| novel.884       | 0.600343103 | 1.874739808 | -1.626739307 | 0.466542642 | 1           | -          |
| ENSG00000265939 | 0.616711807 | 2.231278821 | -1.856853549 | 0.466567331 | 0.590620047 | UBE2CP2    |
| ENSG00000229930 | 6.61129602  | 3.92424089  | 0.752113612  | 0.466898444 | 0.5910104   | AC138393.2 |
| ENSG00000208018 | 0.894837599 | 2.50754145  | -1.48012398  | 0.467028747 | 0.591146539 | MIR645     |
| ENSG00000270580 | 5.11486167  | 7.85793839  | -0.618302564 | 0.467319149 | 0.591485303 | AC139256.2 |
| ENSG00000139132 | 940.4771726 | 651.3932907 | 0.529614585  | 0.46740549  | 0.591565766 | FGD4       |
| ENSG00000252130 | 0.293240848 | 1.396630344 | -2.106756038 | 0.467452928 | 1           | RNU6-1045P |
| ENSG00000216657 | 0.293240848 | 1.396630344 | -2.106756038 | 0.467452928 | 1           | GLRX3P2    |
| ENSG00000278998 | 1.818651661 | 4.198063374 | -1.194791561 | 0.46748956  | 0.591643347 | AC099552.4 |
| ENSG00000103023 | 2.406387005 | 0.672939833 | 1.810020898  | 0.467538628 | 0.591676624 | PRSS54     |
| ENSG00000234750 | 2.416487466 | 4.351599676 | -0.843212784 | 0.467693613 | 0.591843932 | AC012618.2 |
| ENSG00000267898 | 7.001566719 | 3.02822925  | 1.19247093   | 0.467895704 | 0.59207083  | AC026803.2 |
| ENSG00000173226 | 354.0680304 | 305.0367329 | 0.21406611   | 0.467983336 | 0.592152879 | IQCB1      |
| ENSG00000224550 | 12.49534498 | 8.437549209 | 0.57343311   | 0.468034111 | 0.592188284 | AC114491.1 |
| ENSG00000189362 | 146.3396169 | 173.9213669 | -0.250784214 | 0.468175754 | 0.592316282 | NEMP2      |
| ENSG00000107036 | 769.3220369 | 686.3537604 | 0.16480908   | 0.468180869 | 0.592316282 | RIC1       |
| ENSG00000203441 | 0.908699006 | 2.089639274 | -1.214162122 | 0.468392268 | 0.592554878 | LINC00449  |
| ENSG00000243708 | 6.564697203 | 3.300895859 | 1.000730157  | 0.468430629 | 0.592574554 | PLA2G4B    |
| ENSG00000153250 | 2142.879464 | 2557.898687 | -0.255525139 | 0.46855441  | 0.592702279 | RBMS1      |
| ENSG00000007038 | 7.375397443 | 15.08564368 | -1.037464431 | 0.468601314 | 0.59272983  | PRSS21     |
| ENSG00000188158 | 155.6781486 | 117.3599337 | 0.407955791  | 0.468621817 | 0.59272983  | NHS        |
| ENSG00000253455 | 2.767681241 | 5.522718069 | -0.996285642 | 0.468816273 | 0.592946918 | AC022915.1 |
| ENSG00000177946 | 274.2405186 | 237.539794  | 0.206903506  | 0.468867713 | 0.592983111 | CENPBD1    |
| ENSG00000109819 | 78.17418425 | 51.4997436  | 0.599774134  | 0.468965954 | 0.593078488 | PPARGC1A   |
| ENSG00000165458 | 2825.974278 | 3209.139657 | -0.183326129 | 0.469094302 | 0.59319913  | INPPL1     |
| ENSG00000286362 | 1.201939854 | 3.047014077 | -1.325011611 | 0.469107014 | 0.59319913  | AP005717.2 |
| ENSG00000124172 | 4070.290348 | 3532.046326 | 0.204592303  | 0.469407993 | 0.593534269 | ATP5F1E    |
| ENSG00000166562 | 795.8234197 | 681.1675729 | 0.224441293  | 0.469417734 | 0.593534269 | SEC11C     |
| ENSG00000182584 | 37.35863243 | 50.62829616 | -0.442077097 | 0.469489021 | 0.593595516 | ACTL10     |
| ENSG00000156504 | 716.6492912 | 649.3346467 | 0.142092043  | 0.469667132 | 0.593791813 | FAM122B    |
| ENSG00000269289 | 2.149715785 | 0.387220594 | 2.47496977   | 0.469714489 | 1           | AC011503.1 |
| ENSG00000258942 | 2.149715785 | 0.387220594 | 2.47496977   | 0.469714489 | 1           | AL358332.1 |
| ENSG00000171124 | 2.158491326 | 0.356539013 | 2.480531027  | 0.469892158 | 1           | FUT3       |
| ENSG00000106714 | 51.6272839  | 81.22013544 | -0.655107289 | 0.469931581 | 0.594097242 | CNTNAP3    |
| ENSG00000260430 | 7.869935152 | 4.881744087 | 0.675292435  | 0.470096458 | 0.594276765 | AC099518.1 |
| ENSG00000133106 | 432.229448  | 550.6815874 | -0.349740485 | 0.470232316 | 0.594419588 | EPST11     |
| ENSG00000260228 | 17.08919977 | 11.05489275 | 0.633572474  | 0.470419556 | 0.594627347 | AC009119.1 |
| ENSG00000205213 | 543.6550314 | 425.8997691 | 0.352731358  | 0.470599469 | 0.594825824 | LGR4       |
| ENSG00000173214 | 105.8495017 | 123.9387494 | -0.228331286 | 0.470644558 | 0.594853875 | MFSD4B     |
| ENSG00000147548 | 1545.528752 | 1369.069372 | 0.17510256   | 0.47080887  | 0.595032605 | NSD3       |
| ENSG00000260183 | 2.158491326 | 0.336469917 | 2.480537507  | 0.470829504 | 1           | AC108097.1 |
| ENSG00000253525 | 2.158491326 | 0.336469917 | 2.480537507  | 0.470829504 | 1           | AC104966.1 |
| ENSG00000091138 | 1.83125942  | 0.693008929 | 1.37381466   | 0.471076665 | 1           | SLC26A3    |
| ENSG00000259915 | 4.811520361 | 1.936102971 | 1.337220292  | 0.471248409 | 0.595559145 | AC017071.1 |
| ENSG00000141469 | 34.67203961 | 53.6920401  | -0.633373837 | 0.471336885 | 0.595641987 | SLC14A1    |



|                 |             |             |              |             |             |            |
|-----------------|-------------|-------------|--------------|-------------|-------------|------------|
| ENSG00000138592 | 718.9438184 | 791.1995367 | -0.138039731 | 0.471405799 | 0.595700101 | USP8       |
| ENSG00000223559 | 14.57192151 | 19.51379532 | -0.420136487 | 0.471572381 | 0.59585713  | AC073136.1 |
| ENSG00000244184 | 1.230916317 | 3.180481283 | -1.378402428 | 0.471581626 | 0.59585713  | AC091153.3 |
| ENSG00000240747 | 22.21513082 | 12.69021607 | 0.802167125  | 0.471598867 | 0.59585713  | KRBOX1     |
| ENSG00000131013 | 640.1044132 | 706.2126307 | -0.141524997 | 0.471657708 | 0.595902495 | PPIL4      |
| ENSG00000258902 | 0.616711807 | 1.823989131 | -1.569815605 | 0.471777795 | 1           | AL049775.2 |
| ENSG00000285367 | 2.96013129  | 6.347909936 | -1.088753501 | 0.471834895 | 0.59609737  | AC087564.1 |
| ENSG00000178852 | 88.48117941 | 62.12517574 | 0.51271575   | 0.47187645  | 0.596119892 | EFCAB13    |
| ENSG00000261460 | 2.96013129  | 1.060160428 | 1.478811157  | 0.471898612 | 0.596119892 | AC009690.2 |
| ENSG00000253719 | 1375.42185  | 1508.933834 | -0.133659149 | 0.471930493 | 0.596131182 | ATXN7L3B   |
| ENSG00000111912 | 475.2537949 | 383.8457724 | 0.307647845  | 0.471954266 | 0.596132227 | NCOA7      |
| ENSG00000226457 | 0.600343103 | 1.844058227 | -1.607373865 | 0.472011673 | 1           | RPL22P3    |
| ENSG00000235907 | 2.149715785 | 0.336469917 | 2.474982368  | 0.472078374 | 1           | AC115285.1 |
| ENSG00000259728 | 14.09353904 | 9.122385798 | 0.622494645  | 0.472144297 | 0.596343266 | LINC00933  |
| ENSG00000146374 | 79.97833412 | 60.74506565 | 0.399721167  | 0.47222248  | 0.596403307 | RSPO3      |
| ENSG00000225798 | 2.387511003 | 0.672939833 | 1.80006371   | 0.472237744 | 0.596403307 | AC025918.1 |
| ENSG00000110171 | 624.0979015 | 540.8657947 | 0.206808135  | 0.472333785 | 0.596495604 | TRIM3      |
| novel.400       | 120.1845538 | 87.94251764 | 0.449986366  | 0.472434694 | 0.59659404  | -          |
| ENSG00000242021 | 0.615458159 | 2.355289417 | -1.950999259 | 0.472577406 | 0.596724963 | AC112493.1 |
| ENSG00000042832 | 17.56221164 | 27.48243489 | -0.64265015  | 0.472584306 | 0.596724963 | TG         |
| ENSG00000201821 | 1.539272221 | 0.387220594 | 1.991303908  | 0.472695135 | 1           | RNU4-9P    |
| ENSG00000257225 | 4.202401718 | 1.345879667 | 1.624656193  | 0.472695372 | 0.596836199 | AC079601.1 |
| ENSG00000181634 | 22.98578522 | 33.98169777 | -0.563731109 | 0.472811783 | 0.596954171 | TNFSF15    |
| ENSG00000259062 | 1.539272221 | 3.21006989  | -1.070664369 | 0.472930618 | 0.597075192 | ACTN1-AS1  |
| ENSG00000246323 | 1.538018572 | 0.387220594 | 1.990272689  | 0.472953937 | 1           | AC113382.1 |
| ENSG00000260350 | 2.137108026 | 0.713078025 | 1.577154793  | 0.473157403 | 0.597332483 | AC012173.1 |
| ENSG00000137824 | 1091.671092 | 964.060242  | 0.179034681  | 0.473182349 | 0.59733495  | RMDN3      |
| ENSG00000261068 | 0.308355904 | 1.365948763 | -2.079824588 | 0.47322626  | 1           | AL512274.1 |
| ENSG00000281183 | 28.95612283 | 22.42862646 | 0.372079592  | 0.473266999 | 0.597412784 | NPTN-IT1   |
| ENSG00000140835 | 0.307102255 | 1.365948763 | -2.079820135 | 0.473311985 | 1           | CHST4      |
| novel.77        | 0.307102255 | 1.365948763 | -2.079820135 | 0.473311985 | 1           | -          |
| ENSG00000253307 | 0.307102255 | 1.365948763 | -2.079820135 | 0.473311985 | 1           | AC011676.1 |
| ENSG00000270048 | 0.307102255 | 1.365948763 | -2.079820135 | 0.473311985 | 1           | AC068790.4 |
| ENSG00000117614 | 1007.950702 | 891.8659744 | 0.176731102  | 0.473342788 | 0.597479424 | SYF2       |
| ENSG00000059122 | 1269.370914 | 1461.327675 | -0.203132441 | 0.473388206 | 0.597507723 | FLYWCH1    |
| ENSG00000109118 | 844.7462061 | 750.5147898 | 0.171012581  | 0.473524992 | 0.597651339 | PHF12      |
| ENSG00000225891 | 11.37371027 | 7.632426439 | 0.58344318   | 0.473570704 | 0.597679999 | AL513365.2 |
| ENSG00000274554 | 2.403879708 | 1.029478846 | 1.196900718  | 0.473673694 | 0.597780941 | AC083806.2 |
| ENSG00000273129 | 3.997343909 | 1.753169357 | 1.176659161  | 0.473736882 | 0.597831646 | PACERR     |
| ENSG00000214093 | 0.600343103 | 1.834601616 | -1.600686951 | 0.473873089 | 1           | AL096701.1 |
| ENSG00000258860 | 0.61420451  | 2.200597239 | -1.843402835 | 0.473891363 | 0.597968504 | AL133163.2 |
| ENSG00000266654 | 0.61420451  | 2.200597239 | -1.843402835 | 0.473891363 | 0.597968504 | AC129510.2 |
| ENSG00000258957 | 1.816144364 | 0.693008929 | 1.364622878  | 0.473926229 | 1           | AL359317.2 |
| novel.780       | 142.0909015 | 186.5238924 | -0.391372553 | 0.474147015 | 0.598249832 | -          |
| ENSG00000213904 | 13.57503946 | 9.508450517 | 0.506444071  | 0.474160369 | 0.598249832 | LIPE-AS1   |
| ENSG00000172301 | 797.5954006 | 680.6536573 | 0.228401288  | 0.474242676 | 0.598324624 | COPRS      |
| ENSG00000262152 | 0.293240848 | 1.365948763 | -2.079770774 | 0.474264184 | 1           | LINC00514  |
| ENSG00000219410 | 2.153476731 | 0.743759607 | 1.549371101  | 0.474353615 | 0.598435529 | AC125494.1 |
| ENSG00000287997 | 2.461832635 | 0.713078025 | 1.781580165  | 0.474389714 | 0.598452011 | AL354950.3 |
| ENSG00000229404 | 2.756327131 | 1.00940975  | 1.416099837  | 0.474425764 | 0.598468429 | LINC00858  |
| ENSG00000272485 | 1.539272221 | 0.356539013 | 1.99133088   | 0.474499541 | 1           | AL392183.1 |

|                 |             |             |              |             |             |              |
|-----------------|-------------|-------------|--------------|-------------|-------------|--------------|
| ENSG00000280266 | 1.539272221 | 0.356539013 | 1.99133088   | 0.474499541 | 1           | AC006372.4   |
| ENSG00000278041 | 1.21705491  | 2.496928964 | -1.042645566 | 0.474513788 | 0.598550406 | AL133325.3   |
| ENSG00000185344 | 407.9989879 | 348.2944812 | 0.22773642   | 0.474577032 | 0.59860112  | ATP6V0A2     |
| ENSG00000101639 | 655.0660206 | 745.5179435 | -0.186828135 | 0.474612707 | 0.598604012 | CEP192       |
| ENSG00000274265 | 92.5624747  | 79.1555271  | 0.225398318  | 0.474625405 | 0.598604012 | AC245297.3   |
| ENSG00000269729 | 0.586481695 | 2.120320855 | -1.843237852 | 0.474661582 | 0.598611052 | AC006262.2   |
| ENSG00000125846 | 466.2366709 | 402.8905644 | 0.211406228  | 0.474677068 | 0.598611052 | ZNF133       |
| ENSG00000267430 | 2.741212075 | 1.069617038 | 1.352113397  | 0.474725358 | 0.598642893 | AC036176.2   |
| ENSG00000228278 | 1.538018572 | 0.356539013 | 1.990298335  | 0.474759732 | 1           | ORM2         |
| ENSG00000267795 | 1.538018572 | 0.356539013 | 1.990298335  | 0.474759732 | 1           | SMIM22       |
| ENSG00000090054 | 1444.121768 | 1578.36042  | -0.128323019 | 0.474840958 | 0.598759606 | SPTLC1       |
| ENSG00000229931 | 12.55455155 | 7.264119066 | 0.79043538   | 0.474864548 | 0.598760292 | AL137003.1   |
| ENSG00000272862 | 2.739958426 | 1.069617038 | 1.351552491  | 0.474893823 | 0.598768147 | AC106052.1   |
| ENSG00000057663 | 586.229842  | 647.2596355 | -0.142850264 | 0.474988974 | 0.598859054 | ATG5         |
| novel.913       | 35.98988532 | 18.10745158 | 0.993632458  | 0.475054569 | 0.598912692 | -            |
| ENSG00000130881 | 963.9720248 | 841.9079336 | 0.195232013  | 0.475129085 | 0.59897757  | LRP3         |
| ENSG00000259036 | 0.601596751 | 1.90542139  | -1.645385656 | 0.475326222 | 1           | AL355102.5   |
| ENSG00000286017 | 9.515981681 | 5.371621912 | 0.827334313  | 0.475411174 | 0.59930411  | AC011322.1   |
| ENSG00000265656 | 3.532751578 | 1.00940975  | 1.78960466   | 0.47544973  | 0.599323635 | AC106037.2   |
| ENSG00000228919 | 4.591347497 | 2.221822211 | 1.058225546  | 0.475479626 | 0.599332242 | AC097381.1   |
| ENSG00000225674 | 0.616711807 | 1.803920035 | -1.556801473 | 0.475513414 | 1           | IPO7P2       |
| ENSG00000269938 | 3.578096747 | 1.753169357 | 1.021150925  | 0.475662257 | 0.599533358 | AC068790.2   |
| ENSG00000221639 | 1.539272221 | 0.336469917 | 1.991348634  | 0.47569599  | 1           | RF00334      |
| ENSG00000286885 | 3.938137334 | 1.844058227 | 1.106232208  | 0.475711002 | 0.599545343 | AL138824.1   |
| ENSG00000250892 | 0.616711807 | 2.292641984 | -1.891953531 | 0.475740995 | 0.599545343 | AC108475.1   |
| ENSG00000102794 | 0.616711807 | 2.292641984 | -1.891953531 | 0.475740995 | 0.599545343 | ACOD1        |
| ENSG00000262115 | 7.871188801 | 4.625550555 | 0.763077094  | 0.475917505 | 0.5997191   | AC027601.3   |
| ENSG00000259953 | 79.10083379 | 63.38560759 | 0.316191317  | 0.475937876 | 0.5997191   | AL138756.1   |
| ENSG00000273711 | 3.984736151 | 7.358475561 | -0.883241925 | 0.47594812  | 0.5997191   | AC005520.5   |
| ENSG00000182492 | 2460.503704 | 3438.158186 | -0.482728749 | 0.475980656 | 0.59973101  | BGN          |
| ENSG00000173728 | 2.098031101 | 0.723690511 | 1.542851354  | 0.476122259 | 0.599880337 | C1orf100     |
| ENSG00000287721 | 1.495180701 | 3.2194636   | -1.102258167 | 0.476185496 | 0.599930917 | AC061975.8   |
| ENSG00000235908 | 3.632288727 | 6.216882874 | -0.769078566 | 0.476238367 | 0.5999667   | RHOA-IT1     |
| ENSG00000230615 | 11.52235353 | 15.41838918 | -0.421355634 | 0.476260083 | 0.5999667   | AL139220.2   |
| ENSG00000259305 | 2.684512796 | 5.248895586 | -0.968238108 | 0.476308623 | 0.599979207 | ZHX1-C8orf76 |
| ENSG00000151065 | 24.35768072 | 37.07275003 | -0.608600241 | 0.476316197 | 0.599979207 | DCP1B        |
| ENSG00000254648 | 1.803536605 | 0.693008929 | 1.356921687  | 0.476323054 | 1           | AP000911.2   |
| ENSG00000204620 | 6.9788585   | 10.06799224 | -0.529101808 | 0.476347547 | 0.599989607 | AC115618.1   |
| ENSG00000249035 | 13.20747698 | 9.273481955 | 0.509809828  | 0.476435581 | 0.6000714   | CLMAT3       |
| ENSG00000138794 | 176.25591   | 211.6552884 | -0.265220977 | 0.476520003 | 0.600148635 | CASP6        |
| ENSG00000260461 | 2.460578986 | 0.713078025 | 1.780965554  | 0.476608228 | 0.600230653 | AL133355.1   |
| ENSG00000135414 | 666.4044146 | 583.3456816 | 0.192259222  | 0.476731688 | 0.600357035 | GDF11        |
| ENSG00000067992 | 439.5301128 | 343.3492936 | 0.356897966  | 0.476903286 | 0.600544022 | PDK3         |
| ENSG00000236617 | 1.214547612 | 2.782648203 | -1.206690411 | 0.476937063 | 0.600557448 | AC127070.1   |
| ENSG00000230918 | 4.614055717 | 8.915658673 | -0.94886265  | 0.477111802 | 0.600742355 | AC008063.1   |
| ENSG00000226647 | 1.802282956 | 3.606684194 | -0.995919035 | 0.477130153 | 0.600742355 | AL365356.1   |
| ENSG00000253251 | 47.66754981 | 36.57696444 | 0.378325528  | 0.47720923  | 0.600812803 | SHLD3        |
| ENSG00000232485 | 11.26818961 | 7.816644323 | 0.520851416  | 0.477242324 | 0.600825353 | AC098820.1   |
| ENSG00000225071 | 0.586481695 | 2.079026788 | -1.818725882 | 0.477259131 | 1           | AC004552.1   |
| ENSG00000118454 | 694.821283  | 632.8201841 | 0.135056368  | 0.477305888 | 0.600876262 | ANKRD13C     |
| ENSG00000249899 | 4.850597286 | 2.557136252 | 0.93076029   | 0.477565348 | 0.601173763 | AC025180.1   |

|                 |             |             |              |             |             |            |
|-----------------|-------------|-------------|--------------|-------------|-------------|------------|
| ENSG00000235450 | 3.072276198 | 1.060160428 | 1.527227313  | 0.47762955  | 0.601225453 | AC079760.1 |
| ENSG00000203791 | 178.358058  | 152.6104112 | 0.223330396  | 0.477741217 | 0.601333302 | EEF1AKMT2  |
| novel.716       | 5.793358622 | 10.76215704 | -0.894852087 | 0.477761519 | 0.601333302 | -          |
| ENSG00000185716 | 8.796256512 | 12.55662047 | -0.514129093 | 0.477855361 | 0.601334065 | MOSMO      |
| ENSG00000279932 | 0.586481695 | 2.099095884 | -1.831024678 | 0.477877804 | 0.601334065 | AP006248.4 |
| ENSG00000231509 | 0.586481695 | 2.099095884 | -1.831024678 | 0.477877804 | 0.601334065 | AL162253.1 |
| ENSG00000242931 | 0.586481695 | 2.099095884 | -1.831024678 | 0.477877804 | 0.601334065 | RPL7P49    |
| ENSG00000286834 | 9.852060399 | 5.267808806 | 0.899143097  | 0.477877851 | 0.601334065 | AL360020.1 |
| ENSG00000150628 | 0.922560414 | 2.679862578 | -1.532193222 | 0.478090187 | 0.601572121 | SPATA4     |
| ENSG00000115282 | 669.9431096 | 586.2696311 | 0.192723975  | 0.478169827 | 0.601643192 | TTC31      |
| ENSG00000258949 | 4.207416313 | 2.171071533 | 0.961003538  | 0.478210604 | 0.601665361 | AL049870.3 |
| ENSG00000086666 | 1251.59448  | 1143.704959 | 0.130075673  | 0.478414418 | 0.601892644 | ZFAND6     |
| ENSG00000110987 | 62.80130696 | 50.55832829 | 0.311621917  | 0.478446048 | 0.601903292 | BCL7A      |
| ENSG00000243847 | 1.511549406 | 0.387220594 | 1.968219608  | 0.47849569  | 1           | RN7SL610P  |
| ENSG00000216829 | 0.907445357 | 2.180528143 | -1.260032637 | 0.478527935 | 0.60197716  | FGF7P4     |
| ENSG00000184792 | 41.87698322 | 53.54842713 | -0.351518023 | 0.478561154 | 0.6019898   | OSBP2      |
| ENSG00000189051 | 3.591958154 | 1.722487775 | 1.041797985  | 0.478633295 | 0.602051398 | RNF222     |
| ENSG00000272004 | 2.712235611 | 1.069617038 | 1.3390218    | 0.478663516 | 0.602060264 | FO704657.1 |
| ENSG00000227200 | 3.839853833 | 7.409354633 | -0.944933909 | 0.478692277 | 0.602067292 | AL162724.1 |
| ENSG00000198416 | 15.82303875 | 10.95467566 | 0.523785792  | 0.478734325 | 0.60209103  | ZNF658B    |
| ENSG00000279568 | 5.395494759 | 8.609998732 | -0.671069504 | 0.47882899  | 0.602180937 | AC093525.9 |
| ENSG00000284648 | 2.723589721 | 1.00940975  | 1.401090591  | 0.478860872 | 0.602191883 | AC097493.4 |
| ENSG00000135048 | 1396.086078 | 1103.029483 | 0.339724251  | 0.479063298 | 0.602417286 | CEMIP2     |
| ENSG00000233845 | 1.201939854 | 2.812173909 | -1.229189381 | 0.479117073 | 0.602455748 | AC093732.1 |
| ENSG00000233975 | 2.738704777 | 4.728207785 | -0.785148845 | 0.479149816 | 0.602467762 | LINC02574  |
| ENSG00000217128 | 588.7326337 | 511.7719115 | 0.202686953  | 0.479265676 | 0.602582496 | FNIP1      |
| ENSG00000230013 | 1.50778846  | 0.387220594 | 1.965084543  | 0.479287403 | 1           | CT70       |
| ENSG00000267069 | 0.923814062 | 2.211209725 | -1.259393122 | 0.479287452 | 0.602582496 | AP005264.1 |
| ENSG00000280205 | 0.586481695 | 2.852312101 | -2.273889779 | 0.479373316 | 0.602661286 | AC009716.2 |
| ENSG00000232388 | 375.7299864 | 324.305975  | 0.212336524  | 0.479495559 | 0.6027858   | SMIM26     |
| ENSG00000130402 | 1.50778846  | 3.169868797 | -1.076021788 | 0.479648789 | 0.602949254 | ACTN4      |
| ENSG00000237310 | 44.07831241 | 35.02910954 | 0.326733958  | 0.479788922 | 0.603069505 | AC008267.5 |
| ENSG00000140600 | 5.785765458 | 3.036401591 | 0.949649361  | 0.479790873 | 0.603069505 | SH3GL3     |
| ENSG00000258658 | 3.911668168 | 1.90542139  | 1.066409433  | 0.479984709 | 0.603271527 | AL139021.2 |
| ENSG00000124813 | 397.0024546 | 508.9234738 | -0.357976671 | 0.480011893 | 0.603271527 | RUNX2      |
| ENSG00000122550 | 631.8698501 | 698.6381126 | -0.145220008 | 0.480021257 | 0.603271527 | KLHL7      |
| ENSG00000243260 | 0.61420451  | 1.773238453 | -1.540955604 | 0.480133684 | 1           | RN7SL558P  |
| ENSG00000252916 | 3.899060409 | 2.129777466 | 0.868826839  | 0.480139537 | 0.603390989 | RNU6-762P  |
| ENSG00000054938 | 1.233423615 | 3.853421116 | -1.650605475 | 0.480173555 | 0.603404553 | CHRD12     |
| ENSG00000168143 | 1.511549406 | 0.356539013 | 1.968217142  | 0.480330965 | 1           | FAM83B     |
| ENSG00000285614 | 1.511549406 | 0.356539013 | 1.968217142  | 0.480330965 | 1           | AC026100.1 |
| ENSG00000279766 | 2.150969433 | 0.693008929 | 1.612662402  | 0.480399368 | 0.603646935 | AC067931.1 |
| ENSG00000234912 | 130.5116349 | 105.1145898 | 0.310031851  | 0.480412905 | 0.603646935 | SNHG20     |
| ENSG00000151151 | 256.7740116 | 316.3602511 | -0.300817449 | 0.480451122 | 0.603665761 | IPMK       |
| ENSG00000116213 | 437.9146962 | 484.0203717 | -0.144718483 | 0.480504921 | 0.603704161 | WRAP73     |
| ENSG00000105711 | 611.2869193 | 498.2948783 | 0.295427771  | 0.48059863  | 0.603757159 | SCN1B      |
| ENSG00000155827 | 1012.966525 | 902.9512916 | 0.165969523  | 0.480616261 | 0.603757159 | RNF20      |
| ENSG00000059915 | 100.6122803 | 136.8610619 | -0.443009483 | 0.480643049 | 0.603757159 | PSD        |
| ENSG00000125571 | 0.925067711 | 2.486316478 | -1.436904074 | 0.480679291 | 0.603757159 | IL37       |
| ENSG00000212242 | 0.925067711 | 2.486316478 | -1.436904074 | 0.480679291 | 0.603757159 | RNA5SP219  |
| ENSG00000237276 | 39.32822119 | 31.62285952 | 0.318994988  | 0.480686534 | 0.603757159 | ANO7L1     |

|                 |             |             |              |             |             |            |
|-----------------|-------------|-------------|--------------|-------------|-------------|------------|
| ENSG00000230592 | 0.921306765 | 2.476859868 | -1.436016586 | 0.480822458 | 0.603898689 | RPSAP8     |
| ENSG00000277586 | 97.54516056 | 143.023598  | -0.551717049 | 0.480914883 | 0.603965089 | NEFL       |
| ENSG00000124557 | 2.113146158 | 0.743759607 | 1.526077011  | 0.480940756 | 0.603965089 | BTN1A1     |
| ENSG00000267033 | 3.636049674 | 1.844058227 | 0.993311322  | 0.480945065 | 0.603965089 | AC020911.1 |
| ENSG00000136634 | 29.31637688 | 18.58453356 | 0.661444998  | 0.481012408 | 0.604020463 | IL10       |
| ENSG00000259349 | 5.725305234 | 9.213274667 | -0.688084828 | 0.481107451 | 0.604110612 | AC011921.1 |
| ENSG00000273443 | 0.586481695 | 2.169915658 | -1.874017892 | 0.481333689 | 0.604365483 | AL645608.8 |
| ENSG00000274419 | 3.255879435 | 8.261760455 | -1.340168359 | 0.481430965 | 0.604458411 | TBC1D3D    |
| ENSG00000236549 | 1.511549406 | 0.336469917 | 1.968215517  | 0.481547993 | 1           | RPS27AP7   |
| ENSG00000279235 | 1.511549406 | 0.336469917 | 1.968215517  | 0.481547993 | 1           | AC011944.2 |
| novel.703       | 29.87875451 | 18.62685511 | 0.68876824   | 0.481549387 | 0.604577879 | -          |
| ENSG00000131797 | 124.3849895 | 108.2884741 | 0.200969246  | 0.481616337 | 0.604627917 | CLUHP3     |
| ENSG00000268189 | 23.10495382 | 16.44773963 | 0.496498421  | 0.481635786 | 0.604627917 | AC005785.1 |
| ENSG00000206936 | 1.49643435  | 0.387220594 | 1.955514809  | 0.481703197 | 1           | RNU4-52P   |
| ENSG00000224093 | 7.165040305 | 4.290236513 | 0.74161949   | 0.481720524 | 0.604705075 | AL109613.1 |
| ENSG00000243156 | 817.8724899 | 645.9549767 | 0.340711119  | 0.481747592 | 0.604709836 | MICAL3     |
| ENSG00000237264 | 116.9833364 | 152.1174856 | -0.377549221 | 0.481774617 | 0.604714543 | FTH1P11    |
| ENSG00000228877 | 3.325186472 | 1.345879667 | 1.277034173  | 0.481844077 | 0.60477251  | AL669970.3 |
| ENSG00000167615 | 19.68775209 | 28.2204623  | -0.515692044 | 0.481886787 | 0.6047969   | LENG8      |
| ENSG00000237399 | 18.0177437  | 23.96818063 | -0.410302602 | 0.481993724 | 0.604878019 | PITRM1-AS1 |
| ENSG00000116833 | 22.52258908 | 14.24470225 | 0.66757485   | 0.481997984 | 0.604878019 | NR5A2      |
| ENSG00000287920 | 2.421502061 | 0.713078025 | 1.759981732  | 0.482066438 | 0.604934705 | AL022098.1 |
| ENSG00000163319 | 262.5681973 | 300.5419054 | -0.195722823 | 0.482233553 | 0.605115187 | MRPS18C    |
| ENSG00000153347 | 1.493927053 | 0.387220594 | 1.953410734  | 0.482236199 | 1           | FAM81B     |
| ENSG00000257231 | 1.493927053 | 0.387220594 | 1.953410734  | 0.482236199 | 1           | DYNLL1P4   |
| ENSG00000259410 | 1.493927053 | 0.387220594 | 1.953410734  | 0.482236199 | 1           | AC009292.2 |
| ENSG00000225138 | 568.8411796 | 737.3173928 | -0.373920361 | 0.482341512 | 0.605207576 | SLC9A3-AS1 |
| ENSG00000283045 | 1.50778846  | 0.336469917 | 1.965073225  | 0.482346841 | 1           | AC103703.1 |
| ENSG00000230459 | 1.50778846  | 0.336469917 | 1.965073225  | 0.482346841 | 1           | AC060773.1 |
| ENSG00000260589 | 15.7260089  | 11.67952205 | 0.422818664  | 0.482353769 | 0.605207576 | STAM-AS1   |
| ENSG00000136878 | 661.9693893 | 583.6655501 | 0.181935798  | 0.482439041 | 0.605285335 | USP20      |
| ENSG00000110514 | 1068.42741  | 981.5643108 | 0.122449402  | 0.482481984 | 0.605309982 | MADD       |
| ENSG00000204217 | 1512.104633 | 1339.412025 | 0.174904319  | 0.482534295 | 0.605331435 | BMPR2      |
| ENSG00000174611 | 3.63981062  | 7.062143836 | -0.950558756 | 0.482545681 | 0.605331435 | KY         |
| ENSG00000259810 | 3.32769377  | 1.803920035 | 0.887396369  | 0.482655552 | 0.60544003  | AC002519.1 |
| ENSG00000287367 | 6.35329988  | 3.566546002 | 0.830368919  | 0.4828025   | 0.605565208 | AC016583.2 |
| ENSG00000113649 | 1332.669851 | 1514.804019 | -0.184755023 | 0.482808773 | 0.605565208 | TCERG1     |
| ENSG00000283103 | 93.19903142 | 76.90661932 | 0.276298464  | 0.482825268 | 0.605565208 | AC010642.2 |
| ENSG00000134461 | 191.1363296 | 169.252934  | 0.174281927  | 0.483032426 | 0.605773631 | ANKRD16    |
| ENSG00000184100 | 20.82826281 | 27.40729559 | -0.400408025 | 0.483038079 | 0.605773631 | BRD7P2     |
| ENSG00000134262 | 382.8539844 | 339.6243567 | 0.172886081  | 0.483072995 | 0.605788179 | AP4B1      |
| ENSG00000236577 | 3.281094953 | 1.467450118 | 1.174699601  | 0.483098928 | 0.60579146  | SNRPGP14   |
| ENSG00000240160 | 0.586481695 | 1.753169357 | -1.568975852 | 0.483129723 | 1           | RN7SL263P  |
| ENSG00000231566 | 1.22840902  | 3.139187216 | -1.364394224 | 0.48318064  | 0.605864267 | LINC02595  |
| ENSG00000104859 | 1012.768538 | 879.7372391 | 0.203265644  | 0.483220681 | 0.605864267 | CLASRP     |
| ENSG00000241233 | 2.095523804 | 0.774441189 | 1.480773333  | 0.483250268 | 0.605864267 | KRTAP5-8   |
| ENSG00000259079 | 2.095523804 | 0.774441189 | 1.480773333  | 0.483250268 | 0.605864267 | AC005476.1 |
| ENSG00000234405 | 20.33218672 | 14.49041169 | 0.49362874   | 0.483479928 | 0.606104398 | Z69733.1   |
| ENSG00000265519 | 67.7171656  | 57.21331083 | 0.24135385   | 0.483488459 | 0.606104398 | AC015922.2 |
| ENSG00000270755 | 2.459325337 | 0.713078025 | 1.780463721  | 0.483635191 | 0.606193292 | AL136141.1 |
| ENSG00000287202 | 11.90098539 | 17.82442928 | -0.580213027 | 0.483646925 | 0.606193292 | AC008119.1 |

|                 |             |             |              |             |             |             |
|-----------------|-------------|-------------|--------------|-------------|-------------|-------------|
| ENSG00000248641 | 3.270994492 | 1.436768536 | 1.190906827  | 0.483665818 | 0.606193292 | HMGA1P2     |
| ENSG00000245598 | 1.789675198 | 3.597227584 | -0.999672003 | 0.483666703 | 0.606193292 | DACT3-AS1   |
| ENSG00000236015 | 20.4632789  | 14.24714239 | 0.52804373   | 0.48367603  | 0.606193292 | AC011290.2  |
| novel.361       | 2.465593581 | 0.672939833 | 1.844796534  | 0.48381473  | 0.60632714  | -           |
| ENSG00000259488 | 6.623903779 | 9.589882776 | -0.535550188 | 0.483829501 | 0.60632714  | AC023355.1  |
| ENSG00000287769 | 42.3428292  | 32.33020535 | 0.386297166  | 0.483957244 | 0.606457972 | AL353748.3  |
| ENSG00000135336 | 632.0097609 | 702.7849586 | -0.153539895 | 0.484039519 | 0.606531817 | ORC3        |
| ENSG00000266803 | 2.094270155 | 0.743759607 | 1.51511187   | 0.484062863 | 0.606531817 | AC127540.1  |
| ENSG00000180999 | 1.493927053 | 0.356539013 | 1.953387993  | 0.484091548 | 1           | C1orf105    |
| ENSG00000224969 | 4.864458693 | 2.139234076 | 1.181609182  | 0.484147891 | 0.606609102 | AL645608.1  |
| ENSG00000276641 | 0.586481695 | 2.058957692 | -1.806514405 | 0.484287699 | 1           | MIR6769A    |
| ENSG00000286039 | 23.5783217  | 30.30090175 | -0.36631811  | 0.484382939 | 0.606874338 | AC093849.2  |
| ENSG00000241983 | 5.949239044 | 3.11911812  | 0.921960308  | 0.484414861 | 0.606885067 | RN7SL566P   |
| ENSG00000172594 | 181.3306108 | 145.7628629 | 0.314251757  | 0.484443564 | 0.606891761 | SMPDL3A     |
| ENSG00000275993 | 100.4553312 | 74.34143913 | 0.432665906  | 0.484489793 | 0.606892169 | SIK1B       |
| ENSG00000183826 | 272.5815518 | 306.2817404 | -0.168345123 | 0.484490608 | 0.606892169 | BTBD9       |
| ENSG00000066827 | 134.0529482 | 154.995693  | -0.20864256  | 0.484568369 | 0.606960312 | ZFAT        |
| ENSG00000162438 | 0           | 1.161661783 | -2.788009018 | 0.484596061 | 1           | CTRC        |
| ENSG00000145451 | 0           | 1.161661783 | -2.788009018 | 0.484596061 | 1           | GLRA3       |
| ENSG00000286450 | 0           | 1.161661783 | -2.788009018 | 0.484596061 | 1           | AC021573.1  |
| ENSG00000213509 | 0           | 1.161661783 | -2.788009018 | 0.484596061 | 1           | PPIAP16     |
| ENSG00000270090 | 0           | 1.161661783 | -2.788009018 | 0.484596061 | 1           | AL590235.1  |
| ENSG00000243313 | 0           | 1.161661783 | -2.788009018 | 0.484596061 | 1           | RN7SL285P   |
| ENSG00000130182 | 0           | 1.161661783 | -2.788009018 | 0.484596061 | 1           | ZSCAN10     |
| ENSG00000225568 | 0           | 1.161661783 | -2.788009018 | 0.484596061 | 1           | AC093155.1  |
| ENSG00000225486 | 0           | 1.161661783 | -2.788009018 | 0.484596061 | 1           | AL663058.1  |
| ENSG00000270174 | 0           | 1.161661783 | -2.788009018 | 0.484596061 | 1           | AL022097.1  |
| ENSG00000200473 | 0           | 1.161661783 | -2.788009018 | 0.484596061 | 1           | RNA5SP507   |
| ENSG00000283213 | 0           | 1.161661783 | -2.788009018 | 0.484596061 | 1           | AC130466.1  |
| ENSG00000238835 | 0           | 1.161661783 | -2.788009018 | 0.484596061 | 1           | SCARNA18    |
| ENSG00000217646 | 0           | 1.161661783 | -2.788009018 | 0.484596061 | 1           | HIST1H2BPS2 |
| ENSG00000277387 | 0           | 1.161661783 | -2.788009018 | 0.484596061 | 1           | MIR8058     |
| ENSG00000286236 | 0           | 1.161661783 | -2.788009018 | 0.484596061 | 1           | AC018755.5  |
| ENSG00000225087 | 0           | 1.161661783 | -2.788009018 | 0.484596061 | 1           | AL583808.1  |
| ENSG00000258465 | 0           | 1.161661783 | -2.788009018 | 0.484596061 | 1           | AL139011.2  |
| ENSG00000237250 | 0           | 1.161661783 | -2.788009018 | 0.484596061 | 1           | AL359924.1  |
| ENSG00000235934 | 0           | 1.161661783 | -2.788009018 | 0.484596061 | 1           | AC007405.2  |
| ENSG00000230611 | 0           | 1.161661783 | -2.788009018 | 0.484596061 | 1           | HMGB1P27    |
| ENSG00000286329 | 0           | 1.161661783 | -2.788009018 | 0.484596061 | 1           | AC108690.1  |
| ENSG00000248790 | 0           | 1.161661783 | -2.788009018 | 0.484596061 | 1           | AC097103.1  |
| ENSG00000248877 | 0           | 1.161661783 | -2.788009018 | 0.484596061 | 1           | PGBD4P4     |
| ENSG00000249102 | 0           | 1.161661783 | -2.788009018 | 0.484596061 | 1           | AC034223.1  |
| ENSG00000251281 | 0           | 1.161661783 | -2.788009018 | 0.484596061 | 1           | AC034223.2  |
| ENSG00000247699 | 0           | 1.161661783 | -2.788009018 | 0.484596061 | 1           | AC008609.1  |
| ENSG00000200816 | 0           | 1.161661783 | -2.788009018 | 0.484596061 | 1           | SNORA38     |
| ENSG00000224669 | 0           | 1.161661783 | -2.788009018 | 0.484596061 | 1           | AC016769.2  |
| ENSG00000274080 | 0           | 1.161661783 | -2.788009018 | 0.484596061 | 1           | AC005089.1  |
| ENSG00000284231 | 0           | 1.161661783 | -2.788009018 | 0.484596061 | 1           | MIR424      |
| ENSG00000248538 | 0           | 1.161661783 | -2.788009018 | 0.484596061 | 1           | AC022784.1  |
| ENSG00000253182 | 0           | 1.161661783 | -2.788009018 | 0.484596061 | 1           | AC084026.1  |
| ENSG00000201695 | 0           | 1.161661783 | -2.788009018 | 0.484596061 | 1           | RNA5SP334   |

|                 |             |             |              |             |             |              |
|-----------------|-------------|-------------|--------------|-------------|-------------|--------------|
| ENSG00000283217 | 0           | 1.161661783 | -2.788009018 | 0.484596061 | 1           | AC068205.1   |
| ENSG00000254565 | 0           | 1.161661783 | -2.788009018 | 0.484596061 | 1           | MTND2P26     |
| ENSG00000243250 | 0           | 1.161661783 | -2.788009018 | 0.484596061 | 1           | RPS6P16      |
| ENSG00000248682 | 0           | 1.161661783 | -2.788009018 | 0.484596061 | 1           | ARHGAP22-IT1 |
| ENSG00000256243 | 0           | 1.161661783 | -2.788009018 | 0.484596061 | 1           | RPL7AP3      |
| ENSG00000206822 | 0           | 1.161661783 | -2.788009018 | 0.484596061 | 1           | RF00019      |
| ENSG00000284709 | 0           | 1.161661783 | -2.788009018 | 0.484596061 | 1           | KF456110.1   |
| ENSG00000261293 | 0           | 1.161661783 | -2.788009018 | 0.484596061 | 1           | AC007601.2   |
| ENSG00000261487 | 0           | 1.161661783 | -2.788009018 | 0.484596061 | 1           | AC135048.1   |
| ENSG00000266120 | 0           | 1.161661783 | -2.788009018 | 0.484596061 | 1           | AC104984.4   |
| ENSG00000263655 | 0           | 1.161661783 | -2.788009018 | 0.484596061 | 1           | AC090125.1   |
| ENSG00000284776 | 0           | 1.161661783 | -2.788009018 | 0.484596061 | 1           | AL121900.2   |
| ENSG00000183668 | 0           | 1.161661783 | -2.788009018 | 0.484596061 | 1           | PSG9         |
| ENSG00000266308 | 0.907445357 | 2.241891306 | -1.291434162 | 0.484633994 | 0.607013247 | RN7SL510P    |
| ENSG00000214559 | 0.615458159 | 1.885352294 | -1.610765722 | 0.484747246 | 1           | AC019077.1   |
| ENSG00000176749 | 148.2642596 | 121.5284713 | 0.288617031  | 0.484772465 | 0.607157414 | CDK5R1       |
| ENSG00000198723 | 1.49643435  | 0.336469917 | 1.955482133  | 0.484784135 | 1           | TEX45        |
| ENSG00000243738 | 1.49643435  | 0.336469917 | 1.955482133  | 0.484784135 | 1           | RN7SL181P    |
| ENSG00000233079 | 1.49643435  | 0.336469917 | 1.955482133  | 0.484784135 | 1           | LINC01755    |
| ENSG00000259751 | 1.49643435  | 0.336469917 | 1.955482133  | 0.484784135 | 1           | AC018868.2   |
| ENSG00000273345 | 3.968367446 | 2.10970837  | 0.897536055  | 0.484826974 | 0.607175264 | AC104109.4   |
| ENSG00000174132 | 358.2504443 | 404.7301403 | -0.176451798 | 0.484833456 | 0.607175264 | FAM174A      |
| ENSG00000260300 | 3.5743358   | 1.396630344 | 1.348089863  | 0.485039045 | 0.607403452 | AC009119.2   |
| ENSG00000286975 | 10.49774867 | 16.43584288 | -0.63848909  | 0.485065392 | 0.607407169 | AP005136.3   |
| ENSG00000110395 | 1033.27914  | 897.9240424 | 0.202906644  | 0.485107795 | 0.607430991 | CBL          |
| ENSG00000255321 | 1.536764924 | 0.387220594 | 1.989397069  | 0.485181964 | 1           | AC068389.3   |
| ENSG00000231858 | 1.536764924 | 0.387220594 | 1.989397069  | 0.485181964 | 1           | AC067945.3   |
| ENSG00000248863 | 2.052685933 | 0.356539013 | 2.412040112  | 0.485311637 | 1           | AC097376.1   |
| ENSG00000165102 | 1661.789175 | 1469.590274 | 0.177341661  | 0.485312853 | 0.607658469 | HGSNAT       |
| ENSG00000131142 | 1.493927053 | 0.336469917 | 1.953373018  | 0.48532196  | 1           | CCL25        |
| ENSG00000101052 | 499.0827066 | 444.3722613 | 0.166811426  | 0.485392548 | 0.607708463 | IFT52        |
| novel.514       | 52.03432275 | 38.98403201 | 0.415892728  | 0.485403845 | 0.607708463 | -            |
| ENSG00000168003 | 2378.365879 | 2795.8242   | -0.233407499 | 0.485422953 | 0.607708463 | SLC3A2       |
| novel.563       | 326.4177855 | 268.8002196 | 0.279218921  | 0.485458073 | 0.607709326 | -            |
| ENSG00000104081 | 527.671025  | 373.6210896 | 0.498514581  | 0.485470423 | 0.607709326 | BMF          |
| ENSG00000008710 | 2741.382632 | 3183.39068  | -0.215589896 | 0.485509046 | 0.607728393 | PKD1         |
| ENSG00000148384 | 684.1466274 | 595.8362467 | 0.199070585  | 0.485581179 | 0.607768814 | INPP5E       |
| ENSG00000263627 | 1.21705491  | 2.537067156 | -1.058981469 | 0.485606164 | 0.607768814 | PPP4R1-AS1   |
| ENSG00000145779 | 325.3924527 | 245.8121201 | 0.404863432  | 0.485611517 | 0.607768814 | TNFAIP8      |
| ENSG00000218996 | 2.080408748 | 0.723690511 | 1.532305872  | 0.485715674 | 0.607821047 | ARL4AP5      |
| ENSG00000239351 | 2.080408748 | 0.723690511 | 1.532305872  | 0.485715674 | 0.607821047 | NPM1P29      |
| ENSG00000075413 | 1519.334001 | 1342.234615 | 0.178919739  | 0.485723436 | 0.607821047 | MARK3        |
| ENSG00000130023 | 197.9729403 | 147.191763  | 0.426697576  | 0.485853345 | 0.607954331 | ERMARD       |
| ENSG00000176148 | 388.4570877 | 336.8880453 | 0.205699186  | 0.485978656 | 0.608081847 | TCP11L1      |
| ENSG00000213252 | 0.894837599 | 2.10970837  | -1.236359901 | 0.486030352 | 0.608117245 | AP001282.1   |
| ENSG00000250151 | 1.54052587  | 0.356539013 | 1.992542065  | 0.486118417 | 1           | ARPC4-TLLL3  |
| ENSG00000270714 | 1.54052587  | 0.356539013 | 1.992542065  | 0.486118417 | 1           | MICOS10P2    |
| ENSG00000251533 | 1.54052587  | 0.356539013 | 1.992542065  | 0.486118417 | 1           | LINC00605    |
| ENSG00000237298 | 69.80327313 | 57.44468337 | 0.28216654   | 0.486249817 | 0.608362539 | TTN-AS1      |
| ENSG00000228097 | 2.052685933 | 0.336469917 | 2.412027244  | 0.486289782 | 1           | MTATP6P11    |
| ENSG00000247011 | 4.204909015 | 1.782695063 | 1.235998681  | 0.486339042 | 0.608444872 | AC005920.1   |

|                 |             |             |              |             |             |            |
|-----------------|-------------|-------------|--------------|-------------|-------------|------------|
| novel.125       | 30.79261031 | 20.0499759  | 0.613290521  | 0.486390692 | 0.608480189 | -          |
| ENSG00000275202 | 24.1950335  | 30.25947929 | -0.324929652 | 0.486417102 | 0.608483929 | AL161421.1 |
| ENSG00000178386 | 17.25016606 | 13.03472993 | 0.408573527  | 0.486453282 | 0.60849989  | AC092072.1 |
| ENSG00000260273 | 7.681246049 | 4.148596966 | 0.874716865  | 0.486484178 | 0.60850924  | AL359711.2 |
| ENSG00000169410 | 1021.967837 | 1198.321658 | -0.22967212  | 0.486522976 | 0.608528474 | PTPN9      |
| ENSG00000175221 | 658.6059527 | 729.0515949 | -0.146631337 | 0.48655107  | 0.608534316 | MED16      |
| ENSG00000286437 | 3.021845164 | 1.386017859 | 1.105431721  | 0.486683611 | 0.608670786 | AF111169.4 |
| ENSG00000228775 | 3.388153995 | 1.069617038 | 1.658679976  | 0.486728526 | 0.608697657 | WEE2-AS1   |
| ENSG00000236146 | 1.536764924 | 0.356539013 | 1.98941887   | 0.486898156 | 1           | AL353803.3 |
| ENSG00000105409 | 1.536764924 | 0.356539013 | 1.98941887   | 0.486898156 | 1           | ATP1A3     |
| ENSG00000077935 | 3.900314058 | 2.129777466 | 0.869246557  | 0.48693152  | 0.60892221  | SMC1B      |
| ENSG00000250222 | 8.845433898 | 12.93322858 | -0.55003599  | 0.48697927  | 0.608934397 | AC008443.5 |
| ENSG00000152944 | 351.3091528 | 409.1828558 | -0.220609205 | 0.486988142 | 0.608934397 | MED21      |
| ENSG00000272248 | 0.907445357 | 2.129777466 | -1.234516443 | 0.487037608 | 0.608959341 | AL138831.2 |
| ENSG00000219693 | 8.97993102  | 5.502648973 | 0.716526682  | 0.487054968 | 0.608959341 | FGF7P8     |
| ENSG00000183154 | 7.016681776 | 4.402350354 | 0.680849047  | 0.487142883 | 0.609039951 | AC138356.1 |
| ENSG00000272945 | 0.61420451  | 1.793307549 | -1.553710982 | 0.487168991 | 1           | AL356299.2 |
| ENSG00000226644 | 2.44546393  | 1.029478846 | 1.218881179  | 0.487262195 | 0.609159806 | AL121899.1 |
| ENSG00000259584 | 1.526664462 | 0.387220594 | 1.98092496   | 0.487288078 | 1           | AC021755.2 |
| ENSG00000238406 | 1.526664462 | 0.387220594 | 1.98092496   | 0.487288078 | 1           | RNU7-171P  |
| ENSG00000272426 | 1.526664462 | 0.387220594 | 1.98092496   | 0.487288078 | 1           | BX284668.6 |
| ENSG00000182473 | 1015.154578 | 1109.483703 | -0.128139186 | 0.487351534 | 0.609220736 | EXOC7      |
| ENSG00000198938 | 73780.94976 | 64227.77749 | 0.200047325  | 0.48735783  | 0.609220736 | MT-CO3     |
| ENSG00000235145 | 1.832513069 | 0.743759607 | 1.32202007   | 0.487361963 | 1           | RPSAP16    |
| ENSG00000156172 | 68.62203239 | 56.27613352 | 0.282452818  | 0.487547447 | 0.609428444 | C8orf37    |
| ENSG00000113575 | 2035.775753 | 2225.874322 | -0.128851337 | 0.487634488 | 0.60950792  | PPP2CA     |
| ENSG00000242154 | 0.308355904 | 1.782695063 | -2.454421697 | 0.487675219 | 1           | AC004884.2 |
| ENSG00000272305 | 10.60863993 | 7.500243502 | 0.4971294    | 0.487718759 | 0.609583926 | AC096887.1 |
| ENSG00000116698 | 1130.695829 | 1228.278012 | -0.119425323 | 0.487818738 | 0.609679558 | SMG7       |
| ENSG00000137216 | 926.6431837 | 1049.582777 | -0.179390205 | 0.48787122  | 0.60971582  | TMEM63B    |
| ENSG00000230638 | 0.909952655 | 2.129777466 | -1.232141774 | 0.487909446 | 0.609734262 | AL445933.1 |
| ENSG00000264268 | 1.536764924 | 0.336469917 | 1.989433228  | 0.488036219 | 1           | MIR4767    |
| ENSG00000175826 | 1319.359569 | 1459.492419 | -0.145577063 | 0.488050252 | 0.609880891 | CTDNBP1    |
| ENSG00000258526 | 15.70587925 | 10.1094147  | 0.628382992  | 0.488104466 | 0.609919303 | AL049828.1 |
| ENSG00000113583 | 1639.013597 | 1835.984711 | -0.163799453 | 0.48829475  | 0.61012773  | C5orf15    |
| ENSG00000105261 | 1.521649867 | 0.387220594 | 1.976736987  | 0.48833277  | 1           | OVOL3      |
| ENSG00000201164 | 1.521649867 | 0.387220594 | 1.976736987  | 0.48833277  | 1           | RNU4-36P   |
| ENSG00000259402 | 3.308817768 | 1.069617038 | 1.626877028  | 0.488371934 | 0.610194826 | AC090515.5 |
| ENSG00000080007 | 9.029037135 | 12.95458194 | -0.52614896  | 0.488525512 | 0.610338687 | DDX43      |
| ENSG00000172795 | 683.021286  | 592.760045  | 0.203980929  | 0.488534057 | 0.610338687 | DCP2       |
| ENSG00000207313 | 0.293240848 | 1.782695063 | -2.454417226 | 0.488558825 | 1           | SNORA2B    |
| ENSG00000242748 | 0.293240848 | 1.782695063 | -2.454417226 | 0.488558825 | 1           | RPL23AP81  |
| ENSG00000250116 | 17.33931802 | 11.79980823 | 0.564511339  | 0.488772057 | 0.610578889 | AC018682.1 |
| ENSG00000248569 | 25.44991169 | 20.02618239 | 0.344129152  | 0.488773324 | 0.610578889 | AC026410.3 |
| ENSG00000178093 | 31.24062047 | 25.02834105 | 0.317766291  | 0.488827649 | 0.610594549 | TSSK6      |
| ENSG00000275793 | 8.284096449 | 4.912425669 | 0.743038732  | 0.488832863 | 0.610594549 | RIMBP3     |
| ENSG00000231307 | 1.526664462 | 0.356539013 | 1.980937472  | 0.489014243 | 1           | RPS3P2     |
| ENSG00000137270 | 1.526664462 | 0.356539013 | 1.980937472  | 0.489014243 | 1           | GCM1       |
| ENSG00000185215 | 1747.183922 | 1328.611174 | 0.395256252  | 0.489134693 | 0.610942188 | TNFAIP2    |
| ENSG00000256588 | 2.420248412 | 1.049547942 | 1.189568845  | 0.489190801 | 0.610982896 | AC027544.2 |
| ENSG00000257108 | 42.06094246 | 31.97695838 | 0.399315885  | 0.489517794 | 0.61136191  | NHLRC4     |

|                 |             |             |              |             |             |             |
|-----------------|-------------|-------------|--------------|-------------|-------------|-------------|
| ENSG00000245662 | 0.615458159 | 1.783850939 | -1.545062763 | 0.489615138 | 1           | LINC02211   |
| ENSG00000139180 | 348.9330394 | 301.8743945 | 0.208685779  | 0.48971742  | 0.611536248 | NDUFA9      |
| ENSG00000248996 | 10.56078746 | 6.867441861 | 0.623903947  | 0.489733736 | 0.611536248 | AC145098.1  |
| novel.797       | 24.64451078 | 19.06636744 | 0.369740174  | 0.489744609 | 0.611536248 | -           |
| ENSG00000238317 | 1.804790254 | 3.61729668  | -0.99796065  | 0.489751538 | 0.611536248 | SNORD11     |
| ENSG00000160293 | 851.9795563 | 958.7280563 | -0.170233603 | 0.489843975 | 0.611622275 | VAV2        |
| ENSG00000258769 | 2.76893489  | 1.049547942 | 1.384375632  | 0.489880237 | 0.611638159 | RAP1AP      |
| ENSG00000225099 | 2.43410982  | 1.10029862  | 1.1566859    | 0.489958905 | 0.611687034 | ATP6V1E1P1  |
| ENSG00000283971 | 0.922560414 | 2.241891306 | -1.276225066 | 0.489985827 | 0.611687034 | MIR4442     |
| ENSG00000198933 | 451.9905138 | 360.8440599 | 0.325661952  | 0.489990014 | 0.611687034 | TBKBP1      |
| ENSG00000199172 | 1.818651661 | 0.743759607 | 1.313605225  | 0.490021696 | 1           | MIR331      |
| ENSG00000225505 | 1.521649867 | 0.356539013 | 1.976744513  | 0.490063968 | 1           | AC104332.1  |
| ENSG00000121274 | 327.8111078 | 289.1639678 | 0.181394183  | 0.490130067 | 0.611791655 | TENT4B      |
| ENSG00000265394 | 3.518890171 | 1.029478846 | 1.762409147  | 0.490133475 | 0.611791655 | AC104984.2  |
| ENSG00000213970 | 1.526664462 | 0.336469917 | 1.980945713  | 0.490158956 | 1           | AC006122.1  |
| ENSG00000170876 | 2356.282897 | 2108.299069 | 0.160361106  | 0.4901652   | 0.611791655 | TMEM43      |
| ENSG00000168263 | 4.504418106 | 1.548882377 | 1.560322126  | 0.490168011 | 0.611791655 | KCNV2       |
| ENSG00000260238 | 0.922560414 | 2.415496705 | -1.404910972 | 0.490228656 | 0.611837956 | PMF1-BGLAP  |
| ENSG00000231636 | 2.946269883 | 1.049547942 | 1.48233971   | 0.49032437  | 0.611928017 | AGBL5-AS1   |
| ENSG00000215223 | 0           | 1.130980201 | -2.752568713 | 0.490385827 | 1           | CYP51A1P3   |
| ENSG00000231194 | 0           | 1.130980201 | -2.752568713 | 0.490385827 | 1           | FARP1-AS1   |
| ENSG00000269859 | 0           | 1.130980201 | -2.752568713 | 0.490385827 | 1           | AC008735.3  |
| ENSG00000208005 | 0           | 1.130980201 | -2.752568713 | 0.490385827 | 1           | MIR503      |
| ENSG00000237037 | 0           | 1.130980201 | -2.752568713 | 0.490385827 | 1           | NDUFA6-DT   |
| ENSG00000271146 | 0           | 1.130980201 | -2.752568713 | 0.490385827 | 1           | AC018889.1  |
| ENSG00000268257 | 0           | 1.130980201 | -2.752568713 | 0.490385827 | 1           | AIRN        |
| ENSG00000250267 | 0           | 1.130980201 | -2.752568713 | 0.490385827 | 1           | AC021237.1  |
| ENSG00000249173 | 0           | 1.130980201 | -2.752568713 | 0.490385827 | 1           | LINC01093   |
| ENSG00000218896 | 0           | 1.130980201 | -2.752568713 | 0.490385827 | 1           | TUBB8P2     |
| ENSG00000202279 | 0           | 1.130980201 | -2.752568713 | 0.490385827 | 1           | RF00019     |
| ENSG00000265282 | 0           | 1.130980201 | -2.752568713 | 0.490385827 | 1           | AC005828.4  |
| ENSG00000216031 | 0           | 1.130980201 | -2.752568713 | 0.490385827 | 1           | MIR298      |
| ENSG00000205922 | 0           | 1.130980201 | -2.752568713 | 0.490385827 | 1           | ONECUT3     |
| ENSG00000283973 | 0           | 1.130980201 | -2.752568713 | 0.490385827 | 1           | AC099795.1  |
| ENSG00000286748 | 0           | 1.130980201 | -2.752568713 | 0.490385827 | 1           | AC145625.2  |
| ENSG00000273077 | 0           | 1.130980201 | -2.752568713 | 0.490385827 | 1           | AC110609.1  |
| ENSG00000232906 | 0           | 1.130980201 | -2.752568713 | 0.490385827 | 1           | AC092685.1  |
| ENSG00000253121 | 0           | 1.130980201 | -2.752568713 | 0.490385827 | 1           | AC120042.2  |
| ENSG00000213556 | 0           | 1.130980201 | -2.752568713 | 0.490385827 | 1           | AL359692.1  |
| ENSG00000278520 | 0           | 1.130980201 | -2.752568713 | 0.490385827 | 1           | MIR7851     |
| ENSG00000276308 | 0           | 1.130980201 | -2.752568713 | 0.490385827 | 1           | AC078880.4  |
| ENSG00000226134 | 0           | 1.130980201 | -2.752568713 | 0.490385827 | 1           | AL359502.1  |
| ENSG00000100557 | 0           | 1.130980201 | -2.752568713 | 0.490385827 | 1           | CCDC198     |
| ENSG00000200089 | 0           | 1.130980201 | -2.752568713 | 0.490385827 | 1           | SNORD114-31 |
| ENSG00000259396 | 0           | 1.130980201 | -2.752568713 | 0.490385827 | 1           | AC087721.1  |
| ENSG00000274805 | 0           | 1.130980201 | -2.752568713 | 0.490385827 | 1           | MIR6768     |
| ENSG00000221852 | 0           | 1.130980201 | -2.752568713 | 0.490385827 | 1           | KRTAP1-5    |
| ENSG00000267269 | 0           | 1.130980201 | -2.752568713 | 0.490385827 | 1           | AC010776.1  |
| ENSG00000125779 | 625.4123541 | 693.4970925 | -0.149493787 | 0.490430247 | 0.612030753 | PANK2       |
| novel.938       | 196.7508593 | 79.58548878 | 1.306136632  | 0.490577097 | 0.612184608 | -           |
| ENSG00000159723 | 3.284855899 | 1.518200796 | 1.142840754  | 0.490860053 | 0.612508286 | AGRP        |



|                 |             |             |              |             |             |            |
|-----------------|-------------|-------------|--------------|-------------|-------------|------------|
| ENSG00000160216 | 2050.62663  | 2266.761519 | -0.14449363  | 0.490905553 | 0.612535644 | AGPAT3     |
| ENSG00000088035 | 275.8702124 | 230.3838545 | 0.259506639  | 0.490998825 | 0.612622603 | ALG6       |
| ENSG00000283064 | 0.923814062 | 2.140389951 | -1.223659699 | 0.491173247 | 0.612810802 | AL353759.1 |
| ENSG00000075089 | 393.6339321 | 446.6670398 | -0.182341616 | 0.49132265  | 0.612967769 | ACTR6      |
| ENSG00000233077 | 0.600343103 | 1.813376645 | -1.58827896  | 0.491364877 | 1           | LINC01271  |
| ENSG00000223284 | 0.601596751 | 1.742556871 | -1.539611525 | 0.49140457  | 1           | RNU6-195P  |
| ENSG00000158019 | 537.5435714 | 487.3524159 | 0.14171443   | 0.491433232 | 0.613065727 | BABAM2     |
| ENSG00000244926 | 8.96857691  | 5.625503694 | 0.667711434  | 0.491448362 | 0.613065727 | ALKBH3-AS1 |
| ENSG00000173141 | 775.7505686 | 862.0655414 | -0.152424749 | 0.49172866  | 0.613352528 | MRPL57     |
| novel.656       | 4.566203251 | 2.069570178 | 1.126802536  | 0.491746932 | 0.613352528 | -          |
| ENSG00000271924 | 1.511549406 | 3.669203232 | -1.27468012  | 0.491749092 | 0.613352528 | RNA5SP108  |
| ENSG00000166619 | 1220.499366 | 1407.927775 | -0.206253545 | 0.491838036 | 0.613434017 | BLCAP      |
| ENSG00000257194 | 0.601596751 | 1.813376645 | -1.586357665 | 0.491884679 | 1           | AC126178.1 |
| ENSG00000197903 | 162.3783831 | 196.5320622 | -0.275392989 | 0.491893153 | 0.61347331  | HIST1H2BK  |
| ENSG00000249715 | 17.00979228 | 22.5408687  | -0.408140109 | 0.491977942 | 0.613549604 | FER1L5     |
| ENSG00000182612 | 26.45682292 | 33.95563969 | -0.356955905 | 0.492046395 | 0.613605519 | TSPAN10    |
| ENSG00000279088 | 217.716268  | 183.5721805 | 0.246087242  | 0.492083009 | 0.613606232 | AC022400.8 |
| ENSG00000220685 | 3.253372138 | 1.00940975  | 1.669440413  | 0.492094201 | 0.613606232 | AL139094.1 |
| ENSG00000267646 | 2.14337627  | 0.723690511 | 1.568968889  | 0.492207838 | 0.613718474 | AC008543.5 |
| ENSG00000259216 | 1.480065645 | 3.780161198 | -1.337700138 | 0.492398441 | 0.613926667 | AC084757.1 |
| ENSG00000287957 | 4.164578442 | 2.180528143 | 0.943734553  | 0.492461839 | 0.613976248 | AC007695.1 |
| ENSG00000180138 | 2.082916045 | 0.743759607 | 1.507833898  | 0.4926676   | 0.614203307 | CSNK1A1L   |
| ENSG00000223901 | 4.498149863 | 7.895764832 | -0.809451102 | 0.49273419  | 0.614256849 | AP001469.1 |
| ENSG00000228223 | 340.4334833 | 275.4227095 | 0.305354054  | 0.492821906 | 0.614336721 | HCG11      |
| ENSG00000269365 | 3.578096747 | 1.426156051 | 1.325986518  | 0.492863612 | 0.614354274 | AC120349.1 |
| ENSG00000121904 | 435.9437588 | 688.4513118 | -0.658998044 | 0.49288328  | 0.614354274 | CSMD2      |
| ENSG00000280063 | 1.803536605 | 0.743759607 | 1.304415955  | 0.492938916 | 1           | AC012676.5 |
| ENSG00000145012 | 1764.113769 | 2053.833607 | -0.2192518   | 0.492946737 | 0.614403894 | LPP        |
| ENSG00000267304 | 1.215801261 | 2.486316478 | -1.039130434 | 0.493076168 | 0.614482859 | AC004637.1 |
| ENSG00000169926 | 221.6052276 | 265.3556167 | -0.258963762 | 0.493087262 | 0.614482859 | KLF13      |
| ENSG00000113742 | 560.6887967 | 472.2865713 | 0.247716604  | 0.49308912  | 0.614482859 | CPEB4      |
| ENSG00000250575 | 1.493927053 | 3.139187216 | -1.074006338 | 0.493104697 | 0.614482859 | AL732372.3 |
| ENSG00000127220 | 390.3969995 | 329.1596744 | 0.246732736  | 0.493318442 | 0.614711392 | ABHD8      |
| ENSG00000198646 | 820.9263564 | 723.9233919 | 0.181777554  | 0.493335408 | 0.614711392 | NCOA6      |
| ENSG00000260095 | 3.631035079 | 1.722487775 | 1.056300655  | 0.493457149 | 0.614833599 | AC106820.3 |
| ENSG00000270822 | 4.848089989 | 2.139234076 | 1.177313091  | 0.49352124  | 0.614862434 | AC092032.1 |
| novel.456       | 211.0742987 | 175.8631077 | 0.26281848   | 0.493530499 | 0.614862434 | -          |
| ENSG00000227107 | 2.463086283 | 4.748276881 | -0.948728011 | 0.493551289 | 0.614862434 | AC104667.1 |
| ENSG00000269924 | 1.788421549 | 0.693008929 | 1.348626593  | 0.493840797 | 1           | AC024451.4 |
| ENSG00000267387 | 3.912921816 | 2.149846562 | 0.864450071  | 0.493848883 | 0.615189949 | AC020931.1 |
| ENSG00000250571 | 250.4938669 | 286.5548909 | -0.19358041  | 0.493881196 | 0.615189949 | GLI4       |
| ENSG00000275381 | 2.694613258 | 1.029478846 | 1.369168404  | 0.493885222 | 0.615189949 | AC019206.1 |
| ENSG00000163156 | 522.5100909 | 586.8901164 | -0.167964411 | 0.493924034 | 0.615194957 | SCNM1      |
| ENSG00000286877 | 0.616711807 | 2.169915658 | -1.820986781 | 0.493939015 | 0.615194957 | AC090510.4 |
| ENSG00000261267 | 4.483034806 | 2.200597239 | 1.037175991  | 0.493960278 | 0.615194957 | AC026470.3 |
| ENSG00000089737 | 190.8998593 | 223.2033982 | -0.22674515  | 0.494000552 | 0.615215624 | DDX24      |
| ENSG00000121486 | 438.0895514 | 391.7839403 | 0.160743086  | 0.494099939 | 0.615283588 | TRMT1L     |
| ENSG00000112576 | 2117.422986 | 2477.885725 | -0.226915115 | 0.494104275 | 0.615283588 | CCND3      |
| ENSG00000130803 | 541.1009256 | 485.2257549 | 0.157786097  | 0.494126171 | 0.615283588 | ZNF317     |
| ENSG00000166507 | 15.34709231 | 20.23979759 | -0.394731674 | 0.494213292 | 0.615362577 | NDST2      |
| ENSG00000171931 | 2.405133356 | 1.060160428 | 1.175159271  | 0.494299041 | 0.615439852 | FBXW10     |

|                 |             |             |              |             |             |            |
|-----------------|-------------|-------------|--------------|-------------|-------------|------------|
| ENSG00000225928 | 0           | 1.110911105 | -2.728696662 | 0.494306253 | 1           | CACYBPP1   |
| ENSG00000241631 | 0           | 1.110911105 | -2.728696662 | 0.494306253 | 1           | RN7SL316P  |
| ENSG00000256977 | 0           | 1.110911105 | -2.728696662 | 0.494306253 | 1           | LIMS3      |
| ENSG00000228742 | 0           | 1.110911105 | -2.728696662 | 0.494306253 | 1           | LINC02577  |
| ENSG00000173826 | 0           | 1.110911105 | -2.728696662 | 0.494306253 | 1           | KCNH6      |
| ENSG00000164266 | 0           | 1.110911105 | -2.728696662 | 0.494306253 | 1           | SPINK1     |
| ENSG00000253882 | 0           | 1.110911105 | -2.728696662 | 0.494306253 | 1           | AC099548.2 |
| ENSG00000184698 | 0           | 1.110911105 | -2.728696662 | 0.494306253 | 1           | OR51M1     |
| ENSG00000277718 | 0           | 1.110911105 | -2.728696662 | 0.494306253 | 1           | LINC02255  |
| ENSG00000279340 | 0           | 1.110911105 | -2.728696662 | 0.494306253 | 1           | AC090617.7 |
| ENSG00000229586 | 0           | 1.110911105 | -2.728696662 | 0.494306253 | 1           | TNPO1P3    |
| ENSG00000199357 | 0           | 1.110911105 | -2.728696662 | 0.494306253 | 1           | RF00019    |
| ENSG00000269706 | 0           | 1.110911105 | -2.728696662 | 0.494306253 | 1           | AC008687.6 |
| ENSG00000155875 | 6.696971762 | 4.199347643 | 0.658849467  | 0.494396972 | 0.615532286 | SAXO1      |
| ENSG00000036054 | 900.1846643 | 1020.672294 | -0.180979617 | 0.494511394 | 0.615645241 | TBC1D23    |
| ENSG00000279066 | 5.381633352 | 8.926271159 | -0.718253534 | 0.494536397 | 0.615646867 | HEXD-IT1   |
| ENSG00000066651 | 373.1155791 | 336.6294588 | 0.148527843  | 0.494581141 | 0.615673069 | TRMT11     |
| ENSG00000256546 | 0.61420451  | 1.753169357 | -1.527060624 | 0.494861991 | 1           | AC156455.1 |
| ENSG00000287437 | 2.639167628 | 0.743759607 | 1.843155998  | 0.494973742 | 0.616109284 | AL161662.1 |
| ENSG00000273669 | 8.193406112 | 5.216929734 | 0.665976109  | 0.494978988 | 0.616109284 | AC015819.1 |
| ENSG00000214264 | 2.435363469 | 1.049547942 | 1.197326085  | 0.495026437 | 0.616138826 | KCTD9P4    |
| ENSG00000286826 | 0.308355904 | 1.080229524 | -1.729547322 | 0.495041743 | 1           | AL136129.1 |
| ENSG00000287788 | 0.308355904 | 1.080229524 | -1.729547322 | 0.495041743 | 1           | AC013701.2 |
| ENSG00000264269 | 3.326440121 | 1.426156051 | 1.218258599  | 0.495066485 | 0.616159155 | AC016866.1 |
| ENSG00000243802 | 1.21705491  | 0.387220594 | 1.65386881   | 0.49507478  | 1           | AC090589.1 |
| ENSG00000256737 | 1.21705491  | 0.387220594 | 1.65386881   | 0.49507478  | 1           | RBBP4P5    |
| ENSG00000261238 | 1.21705491  | 0.387220594 | 1.65386881   | 0.49507478  | 1           | AC009166.1 |
| ENSG00000255520 | 0.307102255 | 1.080229524 | -1.729547815 | 0.49512391  | 1           | AC090589.2 |
| ENSG00000275334 | 0.307102255 | 1.080229524 | -1.729547815 | 0.49512391  | 1           | MIR5787    |
| ENSG00000201659 | 0.307102255 | 1.080229524 | -1.729547815 | 0.49512391  | 1           | RNU12-2P   |
| ENSG00000185201 | 4657.708234 | 3687.109548 | 0.3370663    | 0.495147082 | 0.616221185 | IFITM2     |
| ENSG00000229989 | 1.201939854 | 2.446178286 | -1.032078408 | 0.495163761 | 0.616221185 | MIR181A1HG |
| ENSG00000165309 | 0.601596751 | 1.722487775 | -1.526145082 | 0.495311347 | 1           | ARMC3      |
| ENSG00000227431 | 0.601596751 | 1.722487775 | -1.526145082 | 0.495311347 | 1           | CSE1L-AS1  |
| ENSG00000156925 | 12.93088958 | 5.800264968 | 1.149210843  | 0.495348471 | 0.616421526 | ZIC3       |
| ENSG00000284678 | 1.215801261 | 0.387220594 | 1.652695823  | 0.495401622 | 1           | AL033527.4 |
| ENSG00000177234 | 1.215801261 | 0.387220594 | 1.652695823  | 0.495401622 | 1           | LINC01561  |
| ENSG00000274620 | 1.215801261 | 0.387220594 | 1.652695823  | 0.495401622 | 1           | MIR378J    |
| ENSG00000232546 | 9.049238057 | 5.247611316 | 0.799091256  | 0.495586318 | 0.61668797  | AC027644.1 |
| ENSG00000256843 | 0.925067711 | 2.506385574 | -1.446099974 | 0.49567407  | 0.616767625 | AC023157.2 |
| ENSG00000196862 | 3.311325065 | 1.803920035 | 0.881974633  | 0.49586257  | 0.616972627 | RGPD4      |
| ENSG00000261663 | 27.2434191  | 20.86083087 | 0.38583667   | 0.495905958 | 0.616997064 | AC009065.8 |
| ENSG00000273747 | 5.117368968 | 2.751966622 | 0.877621377  | 0.495965191 | 0.617041212 | AC022558.3 |
| ENSG00000240925 | 0.293240848 | 1.080229524 | -1.729553287 | 0.4960378   | 1           | RPS20P31   |
| novel.208       | 2.3900183   | 1.029478846 | 1.192187522  | 0.496079484 | 0.617153853 | -          |
| ENSG00000008128 | 43.0997369  | 32.20247034 | 0.425093204  | 0.496150837 | 0.617213066 | CDK11A     |
| ENSG00000135083 | 75.29615374 | 59.51972896 | 0.342624318  | 0.496300344 | 0.617369493 | CCNJL      |
| ENSG00000255282 | 0           | 1.10029862  | -2.716401715 | 0.496331814 | 1           | WTAPP1     |
| ENSG00000189196 | 0           | 1.10029862  | -2.716401715 | 0.496331814 | 1           | LINC00994  |
| ENSG00000259499 | 0           | 1.10029862  | -2.716401715 | 0.496331814 | 1           | AC090519.2 |
| ENSG00000235427 | 0           | 1.10029862  | -2.716401715 | 0.496331814 | 1           | AC006159.1 |

|                 |             |             |              |             |             |            |
|-----------------|-------------|-------------|--------------|-------------|-------------|------------|
| ENSG00000250767 | 0           | 1.10029862  | -2.716401715 | 0.496331814 | 1           | AC139783.1 |
| ENSG00000251724 | 0           | 1.10029862  | -2.716401715 | 0.496331814 | 1           | RNU7-175P  |
| ENSG00000229054 | 0           | 1.10029862  | -2.716401715 | 0.496331814 | 1           | RPS29P14   |
| ENSG00000254653 | 0           | 1.10029862  | -2.716401715 | 0.496331814 | 1           | AC024475.1 |
| ENSG00000270025 | 0           | 1.10029862  | -2.716401715 | 0.496331814 | 1           | BMS1P7     |
| ENSG00000213176 | 0           | 1.10029862  | -2.716401715 | 0.496331814 | 1           | RPL13P6    |
| ENSG00000238419 | 0           | 1.10029862  | -2.716401715 | 0.496331814 | 1           | RNU7-186P  |
| ENSG00000230604 | 0           | 1.10029862  | -2.716401715 | 0.496331814 | 1           | TSEN15P2   |
| ENSG00000243173 | 0           | 1.10029862  | -2.716401715 | 0.496331814 | 1           | RN7SL861P  |
| ENSG00000230993 | 0           | 1.10029862  | -2.716401715 | 0.496331814 | 1           | RPL12P15   |
| ENSG00000279721 | 0           | 1.10029862  | -2.716401715 | 0.496331814 | 1           | AC018737.2 |
| ENSG00000241305 | 0           | 1.10029862  | -2.716401715 | 0.496331814 | 1           | ACTG1P13   |
| ENSG00000205830 | 0           | 1.10029862  | -2.716401715 | 0.496331814 | 1           | AC024132.1 |
| ENSG00000228728 | 0           | 1.10029862  | -2.716401715 | 0.496331814 | 1           | PPIAP91    |
| ENSG00000242958 | 0           | 1.10029862  | -2.716401715 | 0.496331814 | 1           | AC040975.1 |
| ENSG00000253388 | 0           | 1.10029862  | -2.716401715 | 0.496331814 | 1           | AC124067.1 |
| ENSG00000207595 | 0           | 1.10029862  | -2.716401715 | 0.496331814 | 1           | MIR181A2   |
| ENSG00000235284 | 0           | 1.10029862  | -2.716401715 | 0.496331814 | 1           | SNORD62A   |
| ENSG00000229719 | 0           | 1.10029862  | -2.716401715 | 0.496331814 | 1           | MIR194-2HG |
| ENSG00000257056 | 0           | 1.10029862  | -2.716401715 | 0.496331814 | 1           | LINC02282  |
| ENSG00000263017 | 0           | 1.10029862  | -2.716401715 | 0.496331814 | 1           | AC036164.1 |
| ENSG00000251461 | 0           | 1.10029862  | -2.716401715 | 0.496331814 | 1           | AC091133.3 |
| ENSG00000267000 | 0           | 1.10029862  | -2.716401715 | 0.496331814 | 1           | AC016229.1 |
| ENSG00000231236 | 0           | 1.10029862  | -2.716401715 | 0.496331814 | 1           | AP001605.1 |
| ENSG00000197302 | 287.5576054 | 255.4908837 | 0.170164527  | 0.49637131  | 0.617428209 | ZNF720     |
| ENSG00000100425 | 965.4312967 | 849.3189106 | 0.184962156  | 0.496402404 | 0.617437326 | BRD1       |
| ENSG00000203761 | 146.227658  | 119.6614371 | 0.289335146  | 0.496520063 | 0.617554108 | MSTO2P     |
| ENSG00000104998 | 126.0562794 | 163.8887141 | -0.378683281 | 0.496544114 | 0.617554458 | IL27RA     |
| ENSG00000111981 | 19.68950394 | 31.25455214 | -0.667221304 | 0.496589015 | 0.617580738 | ULBP1      |
| ENSG00000283525 | 3.378124804 | 0.774441189 | 2.144036523  | 0.496676239 | 0.617659648 | AC005622.1 |
| ENSG00000273014 | 16.08730313 | 20.68850974 | -0.366103108 | 0.496848365 | 0.617836873 | AC018645.2 |
| ENSG00000273018 | 35.91012182 | 23.80428863 | 0.589674166  | 0.496866311 | 0.617836873 | FAM106A    |
| ENSG00000272483 | 1.481319294 | 0.387220594 | 1.942485073  | 0.496901345 | 1           | AC022001.3 |
| ENSG00000262074 | 1.481319294 | 0.387220594 | 1.942485073  | 0.496901345 | 1           | SNORD3B-2  |
| ENSG00000199961 | 0.894837599 | 2.475703993 | -1.465712575 | 0.497058267 | 0.618045984 | SNORD1B    |
| ENSG00000276957 | 3.354162936 | 1.803920035 | 0.895744522  | 0.49715008  | 0.618114402 | AL158063.1 |
| ENSG00000281741 | 11.75004829 | 18.02499184 | -0.612811926 | 0.497160873 | 0.618114402 | AC241377.3 |
| ENSG00000279249 | 1.215801261 | 0.356539013 | 1.652706952  | 0.497161251 | 1           | AC007614.1 |
| ENSG00000263370 | 1.215801261 | 0.356539013 | 1.652706952  | 0.497161251 | 1           | AC104564.1 |
| ENSG00000272672 | 1.215801261 | 0.356539013 | 1.652706952  | 0.497161251 | 1           | AL391497.1 |
| ENSG00000237927 | 1.480065645 | 0.387220594 | 1.941416226  | 0.497170194 | 1           | AL078604.2 |
| ENSG00000259013 | 1.480065645 | 0.387220594 | 1.941416226  | 0.497170194 | 1           | AL118558.2 |
| ENSG00000241923 | 0.615458159 | 1.742556871 | -1.518655541 | 0.497317836 | 1           | RPL14P3    |
| ENSG00000286828 | 0.615458159 | 1.742556871 | -1.518655541 | 0.497317836 | 1           | AC008883.3 |
| ENSG00000251485 | 6.272710004 | 3.435518941 | 0.855168096  | 0.497366765 | 0.618327549 | AC068134.3 |
| ENSG00000167468 | 5018.219373 | 4320.424099 | 0.216075601  | 0.49737991  | 0.618327549 | GPX4       |
| ENSG00000171174 | 73.90677808 | 59.94276821 | 0.301559462  | 0.497545004 | 0.61848294  | RBKS       |
| ENSG00000241597 | 2.124500267 | 4.158053576 | -0.979339647 | 0.497552516 | 0.61848294  | AC022121.1 |
| ENSG00000286176 | 9.136167448 | 5.481424002 | 0.741376815  | 0.497629368 | 0.618548876 | AC116317.1 |
| ENSG00000186767 | 197.3553458 | 166.5250177 | 0.243535975  | 0.497698166 | 0.618604796 | SPIN4      |
| novel.167       | 1.230916317 | 0           | 2.631790075  | 0.497948702 | 1           | -          |

|                 |             |             |              |             |             |            |
|-----------------|-------------|-------------|--------------|-------------|-------------|------------|
| novel.181       | 1.230916317 | 0           | 2.631790075  | 0.497948702 | 1           | -          |
| ENSG00000219404 | 1.230916317 | 0           | 2.631790075  | 0.497948702 | 1           | AL359694.1 |
| ENSG00000235647 | 1.230916317 | 0           | 2.631790075  | 0.497948702 | 1           | AL022319.1 |
| ENSG00000133124 | 1.230916317 | 0           | 2.631790075  | 0.497948702 | 1           | IRS4       |
| ENSG00000183733 | 1.230916317 | 0           | 2.631790075  | 0.497948702 | 1           | FIGLA      |
| ENSG00000261739 | 1.230916317 | 0           | 2.631790075  | 0.497948702 | 1           | GOLGA8S    |
| ENSG00000230787 | 1.230916317 | 0           | 2.631790075  | 0.497948702 | 1           | PSAT1P3    |
| ENSG00000286409 | 1.230916317 | 0           | 2.631790075  | 0.497948702 | 1           | AL391839.3 |
| ENSG00000226212 | 1.230916317 | 0           | 2.631790075  | 0.497948702 | 1           | TRGV6      |
| ENSG00000231740 | 1.230916317 | 0           | 2.631790075  | 0.497948702 | 1           | AL136985.1 |
| ENSG00000230427 | 1.230916317 | 0           | 2.631790075  | 0.497948702 | 1           | AC095033.1 |
| ENSG00000243264 | 1.230916317 | 0           | 2.631790075  | 0.497948702 | 1           | IGKV2D-29  |
| ENSG00000250969 | 1.230916317 | 0           | 2.631790075  | 0.497948702 | 1           | AC097658.2 |
| ENSG00000271272 | 1.230916317 | 0           | 2.631790075  | 0.497948702 | 1           | AC068802.1 |
| ENSG00000286043 | 1.230916317 | 0           | 2.631790075  | 0.497948702 | 1           | AC091214.1 |
| ENSG00000260861 | 1.230916317 | 0           | 2.631790075  | 0.497948702 | 1           | AL049634.2 |
| ENSG00000267089 | 1.230916317 | 0           | 2.631790075  | 0.497948702 | 1           | AC008543.4 |
| novel.574       | 1.230916317 | 0           | 2.631790075  | 0.497948702 | 1           | -          |
| ENSG00000240954 | 1.230916317 | 0           | 2.631790075  | 0.497948702 | 1           | RPL4P1     |
| ENSG00000211818 | 1.230916317 | 0           | 2.631790075  | 0.497948702 | 1           | TRAV39     |
| ENSG00000236570 | 1.230916317 | 0           | 2.631790075  | 0.497948702 | 1           | RAD23BP1   |
| ENSG00000234371 | 1.230916317 | 0           | 2.631790075  | 0.497948702 | 1           | RPSAP31    |
| ENSG00000275418 | 1.230916317 | 0           | 2.631790075  | 0.497948702 | 1           | AC104971.3 |
| ENSG00000131126 | 1.230916317 | 0           | 2.631790075  | 0.497948702 | 1           | TEX101     |
| ENSG00000250358 | 1.230916317 | 0           | 2.631790075  | 0.497948702 | 1           | LINC02200  |
| ENSG00000224458 | 1.230916317 | 0           | 2.631790075  | 0.497948702 | 1           | GUSBP6     |
| ENSG00000179520 | 1.230916317 | 0           | 2.631790075  | 0.497948702 | 1           | SLC17A8    |
| ENSG00000233754 | 1.230916317 | 0           | 2.631790075  | 0.497948702 | 1           | AP001628.2 |
| ENSG00000227896 | 30.01604367 | 36.56481089 | -0.282185335 | 0.498066454 | 0.619032938 | AL731569.1 |
| ENSG00000235912 | 15.72224795 | 20.23864171 | -0.361114521 | 0.498152564 | 0.619110346 | AL031729.1 |
| ENSG00000125931 | 1.215801261 | 0.336469917 | 1.652714303  | 0.498332307 | 1           | CITED1     |
| ENSG00000270270 | 1.215801261 | 0.336469917 | 1.652714303  | 0.498332307 | 1           | BNIP3P10   |
| ENSG00000259840 | 2.361041837 | 0.672939833 | 1.787646008  | 0.498397284 | 0.619358191 | Z97653.1   |
| ENSG00000255234 | 3.072276198 | 1.130980201 | 1.458157158  | 0.498423504 | 0.619358191 | AP000446.1 |
| ENSG00000286471 | 3.072276198 | 1.130980201 | 1.458157158  | 0.498423504 | 0.619358191 | AC027250.2 |
| ENSG00000279488 | 6.329409282 | 4.035198856 | 0.662158838  | 0.498496465 | 0.619419229 | AC004623.1 |
| ENSG00000237892 | 3.002969161 | 6.011440019 | -0.991210614 | 0.498531133 | 0.619432682 | KLF7-IT1   |
| ENSG00000168158 | 1.481319294 | 0.356539013 | 1.94245115   | 0.498673421 | 1           | OR2C1      |
| ENSG00000274001 | 1.481319294 | 0.356539013 | 1.94245115   | 0.498673421 | 1           | AL512506.1 |
| ENSG00000270690 | 1.481319294 | 0.356539013 | 1.94245115   | 0.498673421 | 1           | AC105129.3 |
| ENSG00000140511 | 106.0639042 | 131.2956839 | -0.308036842 | 0.498758126 | 0.619685088 | HAPLN3     |
| ENSG00000181751 | 348.7044901 | 310.1340528 | 0.168767863  | 0.498911099 | 0.619845508 | C5orf30    |
| ENSG00000280040 | 1.480065645 | 0.356539013 | 1.941380874  | 0.498943662 | 1           | AC095031.1 |
| ENSG00000228897 | 1.201939854 | 0.387220594 | 1.639552067  | 0.499065439 | 1           | AC012441.2 |
| ENSG00000261829 | 1.201939854 | 0.387220594 | 1.639552067  | 0.499065439 | 1           | AC009407.1 |
| ENSG00000258537 | 1.201939854 | 0.387220594 | 1.639552067  | 0.499065439 | 1           | FRMD6-AS2  |
| ENSG00000196476 | 213.2646023 | 190.8617156 | 0.16127826   | 0.499102416 | 0.620053549 | C20orf96   |
| ENSG00000064961 | 2289.180879 | 2602.826908 | -0.185145764 | 0.499212277 | 0.620160379 | HMG20B     |
| ENSG00000104140 | 6.746077877 | 3.812127049 | 0.807884761  | 0.499238563 | 0.620163381 | RHOV       |
| ENSG00000239407 | 7.606924417 | 10.88257162 | -0.51503128  | 0.499433115 | 0.620375395 | Z68871.1   |
| ENSG00000236184 | 2.722336072 | 5.075290187 | -0.895621083 | 0.499630805 | 0.620591287 | TCEA1P4    |

|                 |             |             |              |             |             |            |
|-----------------|-------------|-------------|--------------|-------------|-------------|------------|
| ENSG00000151715 | 8.489154257 | 5.298490388 | 0.673107248  | 0.499929784 | 0.620932963 | TMEM45B    |
| ENSG00000267302 | 2.128261214 | 4.871131602 | -1.2004636   | 0.500077617 | 0.621086886 | RNFT1-DT   |
| ENSG00000286997 | 8.238822552 | 4.289080638 | 0.939340431  | 0.500137555 | 0.621131635 | AC005856.1 |
| ENSG00000259502 | 3.268487194 | 1.4981317   | 1.149153965  | 0.500191952 | 0.6211695   | AL132640.1 |
| ENSG00000250432 | 0.922560414 | 2.395427609 | -1.394256309 | 0.500656607 | 0.621687105 | FAM242C    |
| ENSG00000225976 | 0.922560414 | 2.395427609 | -1.394256309 | 0.500656607 | 0.621687105 | CKS1BP2    |
| ENSG00000231333 | 2.135854377 | 0.743759607 | 1.537715919  | 0.500806321 | 0.621843291 | RPL34P6    |
| ENSG00000199691 | 1.201939854 | 0.356539013 | 1.639530423  | 0.500845619 | 1           | RN7SKP173  |
| ENSG00000100031 | 10.02341188 | 6.928805024 | 0.538818819  | 0.500945068 | 0.621985845 | GGT1       |
| ENSG00000269843 | 10.29645181 | 6.859141126 | 0.588505482  | 0.501007988 | 0.622034241 | AC008537.2 |
| ENSG00000235499 | 2.698374204 | 1.069617038 | 1.332825778  | 0.501207622 | 0.622223732 | AC073046.1 |
| ENSG00000286407 | 6.348285285 | 4.065880437 | 0.658473036  | 0.501208508 | 0.622223732 | AC004863.1 |
| ENSG00000089091 | 79.88678923 | 64.92460099 | 0.30184416   | 0.501278579 | 0.622280986 | DZANK1     |
| ENSG00000242553 | 8.204760222 | 11.47407919 | -0.485883949 | 0.501394627 | 0.622395308 | AP001432.1 |
| ENSG00000121570 | 19.06276294 | 9.87804216  | 0.941900366  | 0.501453614 | 0.622402595 | DPPA4      |
| ENSG00000123143 | 3616.77132  | 3183.559494 | 0.184178239  | 0.501468203 | 0.622402595 | PKN1       |
| ENSG00000107951 | 337.43895   | 376.5171609 | -0.158562447 | 0.501498839 | 0.622402595 | MTPAP      |
| ENSG00000126215 | 476.8282023 | 561.2821645 | -0.235159292 | 0.501499015 | 0.622402595 | XRCC3      |
| ENSG00000188451 | 0.907445357 | 2.475703993 | -1.451061531 | 0.501525762 | 0.622402595 | SRP72P2    |
| ENSG00000123545 | 259.1935487 | 306.3252306 | -0.242029249 | 0.501565398 | 0.622402595 | NDUFAF4    |
| ENSG00000228060 | 8.345525588 | 13.99937799 | -0.743746158 | 0.50156819  | 0.622402595 | PABPC4-AS1 |
| ENSG00000148908 | 1073.174835 | 887.0406538 | 0.275099017  | 0.501652331 | 0.622468688 | RGS10      |
| ENSG00000102048 | 19.39354233 | 14.89770138 | 0.38531187   | 0.501669368 | 0.622468688 | ASB9       |
| ENSG00000259782 | 0.586481695 | 2.038888596 | -1.794213638 | 0.501941519 | 1           | AC008915.1 |
| ENSG00000152592 | 1.201939854 | 0.336469917 | 1.639516122  | 0.502030436 | 1           | DMP1       |
| ENSG00000272625 | 1.201939854 | 0.336469917 | 1.639516122  | 0.502030436 | 1           | AP000919.4 |
| ENSG00000286618 | 1.201939854 | 0.336469917 | 1.639516122  | 0.502030436 | 1           | AC131944.1 |
| ENSG00000287051 | 1.201939854 | 0.336469917 | 1.639516122  | 0.502030436 | 1           | AC121757.2 |
| ENSG00000163082 | 28.18449951 | 36.65685564 | -0.37501958  | 0.502135521 | 0.622992292 | SGPP2      |
| ENSG00000156958 | 290.3253586 | 341.0337697 | -0.23184817  | 0.502139317 | 0.622992292 | GALK2      |
| ENSG00000221838 | 283.2097519 | 330.7239809 | -0.224390497 | 0.502298566 | 0.623160111 | AP4M1      |
| ENSG00000186998 | 22.79931868 | 15.55429653 | 0.54333783   | 0.502375015 | 0.623225195 | EMID1      |
| ENSG00000230071 | 0.909952655 | 2.475703993 | -1.448196755 | 0.502401206 | 0.623227928 | RPL4P6     |
| ENSG00000287330 | 0           | 1.069617038 | -2.679482525 | 0.502440134 | 1           | AL353697.1 |
| ENSG00000254418 | 0           | 1.069617038 | -2.679482525 | 0.502440134 | 1           | SPON1-AS1  |
| ENSG00000262020 | 0           | 1.069617038 | -2.679482525 | 0.502440134 | 1           | AC007014.1 |
| ENSG00000259694 | 0           | 1.069617038 | -2.679482525 | 0.502440134 | 1           | AC136698.1 |
| ENSG00000269066 | 0           | 1.069617038 | -2.679482525 | 0.502440134 | 1           | AC020908.3 |
| ENSG00000172912 | 0           | 1.069617038 | -2.679482525 | 0.502440134 | 1           | COX6B1P3   |
| ENSG00000188306 | 0           | 1.069617038 | -2.679482525 | 0.502440134 | 1           | LRR1Q4     |
| ENSG00000235008 | 0           | 1.069617038 | -2.679482525 | 0.502440134 | 1           | AL023775.1 |
| ENSG00000237774 | 0           | 1.069617038 | -2.679482525 | 0.502440134 | 1           | AC126615.1 |
| ENSG00000257169 | 0           | 1.069617038 | -2.679482525 | 0.502440134 | 1           | AC125612.1 |
| ENSG00000260488 | 0           | 1.069617038 | -2.679482525 | 0.502440134 | 1           | AC007216.1 |
| ENSG00000254114 | 0           | 1.069617038 | -2.679482525 | 0.502440134 | 1           | HMG1P28    |
| ENSG00000236003 | 0           | 1.069617038 | -2.679482525 | 0.502440134 | 1           | AC007731.3 |
| ENSG00000239455 | 0           | 1.069617038 | -2.679482525 | 0.502440134 | 1           | AC074043.1 |
| ENSG00000236086 | 0           | 1.069617038 | -2.679482525 | 0.502440134 | 1           | HMG2P28    |
| ENSG00000255084 | 0           | 1.069617038 | -2.679482525 | 0.502440134 | 1           | AP003110.1 |
| ENSG00000232142 | 0           | 1.069617038 | -2.679482525 | 0.502440134 | 1           | RPS25P9    |
| ENSG00000279294 | 0           | 1.069617038 | -2.679482525 | 0.502440134 | 1           | AC092135.1 |

|                 |              |             |              |             |             |            |
|-----------------|--------------|-------------|--------------|-------------|-------------|------------|
| ENSG00000260862 | 0            | 1.069617038 | -2.679482525 | 0.502440134 | 1           | AC099506.1 |
| ENSG00000262623 | 0            | 1.069617038 | -2.679482525 | 0.502440134 | 1           | AC004584.2 |
| ENSG00000266580 | 0            | 1.069617038 | -2.679482525 | 0.502440134 | 1           | MIR4254    |
| ENSG00000232536 | 0            | 1.069617038 | -2.679482525 | 0.502440134 | 1           | AL365436.2 |
| ENSG00000224260 | 0            | 1.069617038 | -2.679482525 | 0.502440134 | 1           | AL023754.1 |
| ENSG00000286174 | 0            | 1.069617038 | -2.679482525 | 0.502440134 | 1           | AL596330.2 |
| ENSG00000230432 | 0            | 1.069617038 | -2.679482525 | 0.502440134 | 1           | AC114803.1 |
| ENSG00000235240 | 0            | 1.069617038 | -2.679482525 | 0.502440134 | 1           | AC026185.1 |
| ENSG00000228767 | 0            | 1.069617038 | -2.679482525 | 0.502440134 | 1           | KRT8P18    |
| ENSG00000265981 | 0            | 1.069617038 | -2.679482525 | 0.502440134 | 1           | MIR544B    |
| ENSG00000250541 | 0            | 1.069617038 | -2.679482525 | 0.502440134 | 1           | AC092436.4 |
| ENSG00000248848 | 0            | 1.069617038 | -2.679482525 | 0.502440134 | 1           | PPBPP2     |
| ENSG00000229922 | 0            | 1.069617038 | -2.679482525 | 0.502440134 | 1           | LINC02528  |
| ENSG00000201643 | 0            | 1.069617038 | -2.679482525 | 0.502440134 | 1           | SNORA14A   |
| ENSG00000199846 | 0            | 1.069617038 | -2.679482525 | 0.502440134 | 1           | RNU1-72P   |
| ENSG00000244335 | 0            | 1.069617038 | -2.679482525 | 0.502440134 | 1           | RN7SL687P  |
| ENSG00000271100 | 0            | 1.069617038 | -2.679482525 | 0.502440134 | 1           | AP000753.3 |
| ENSG00000206855 | 0            | 1.069617038 | -2.679482525 | 0.502440134 | 1           | RNU6-571P  |
| ENSG00000277052 | 0            | 1.069617038 | -2.679482525 | 0.502440134 | 1           | MIR6763    |
| ENSG00000207989 | 0            | 1.069617038 | -2.679482525 | 0.502440134 | 1           | MIR493     |
| ENSG00000203573 | 0            | 1.069617038 | -2.679482525 | 0.502440134 | 1           | RF00017    |
| ENSG00000266758 | 0            | 1.069617038 | -2.679482525 | 0.502440134 | 1           | MIR3680-2  |
| ENSG00000265801 | 0            | 1.069617038 | -2.679482525 | 0.502440134 | 1           | AC069366.2 |
| ENSG00000267644 | 0            | 1.069617038 | -2.679482525 | 0.502440134 | 1           | AC061975.7 |
| ENSG00000224011 | 0            | 1.069617038 | -2.679482525 | 0.502440134 | 1           | AC110602.1 |
| ENSG00000224435 | 0            | 1.069617038 | -2.679482525 | 0.502440134 | 1           | NF1P6      |
| ENSG00000236545 | 0            | 1.069617038 | -2.679482525 | 0.502440134 | 1           | AP001619.2 |
| ENSG00000202239 | 0            | 1.069617038 | -2.679482525 | 0.502440134 | 1           | RNU6-396P  |
| ENSG00000154124 | 432.2901384  | 489.9448909 | -0.180919191 | 0.502549867 | 0.623382578 | OTULIN     |
| ENSG00000235138 | 3.549120283  | 6.931245169 | -0.965607386 | 0.502605161 | 0.623414607 | AL445931.1 |
| ENSG00000198876 | 624.717445   | 707.0444663 | -0.178983082 | 0.502623678 | 0.623414607 | DCAF12     |
| ENSG00000272293 | 12.591121118 | 7.470717796 | 0.749525156  | 0.503057501 | 0.623909381 | AC083964.1 |
| ENSG00000160716 | 6.591166369  | 11.49543256 | -0.804666356 | 0.503070614 | 0.623909381 | CHRNA2     |
| ENSG00000004777 | 288.7482074  | 229.5443257 | 0.330979452  | 0.503161597 | 0.623992432 | ARHGAP33   |
| ENSG00000270061 | 4.443957882  | 2.10970837  | 1.07090768   | 0.503256162 | 0.624079917 | AC068790.5 |
| ENSG00000279159 | 67.25805858  | 49.23709404 | 0.45221724   | 0.503404303 | 0.624233829 | AC003681.1 |
| ENSG00000224167 | 1.232169966  | 0           | 2.633202441  | 0.503536487 | 1           | LINC01357  |
| ENSG00000272799 | 1.232169966  | 0           | 2.633202441  | 0.503536487 | 1           | AC006238.1 |
| ENSG00000235280 | 1.232169966  | 0           | 2.633202441  | 0.503536487 | 1           | MCF2L-AS1  |
| novel.1104      | 1.232169966  | 0           | 2.633202441  | 0.503536487 | 1           | -          |
| ENSG00000286393 | 1.232169966  | 0           | 2.633202441  | 0.503536487 | 1           | Z97192.4   |
| ENSG00000240423 | 1.232169966  | 0           | 2.633202441  | 0.503536487 | 1           | LINC00636  |
| ENSG00000248949 | 1.232169966  | 0           | 2.633202441  | 0.503536487 | 1           | AC122719.1 |
| ENSG00000275152 | 1.232169966  | 0           | 2.633202441  | 0.503536487 | 1           | CCL16      |
| ENSG00000279884 | 1.232169966  | 0           | 2.633202441  | 0.503536487 | 1           | AC010894.5 |
| ENSG00000224041 | 1.232169966  | 0           | 2.633202441  | 0.503536487 | 1           | IGKV3D-15  |
| ENSG00000272154 | 1.232169966  | 0           | 2.633202441  | 0.503536487 | 1           | AC244517.2 |
| ENSG00000286590 | 1.232169966  | 0           | 2.633202441  | 0.503536487 | 1           | AL132775.1 |
| ENSG00000255649 | 1.232169966  | 0           | 2.633202441  | 0.503536487 | 1           | AC008114.1 |
| ENSG00000287452 | 1.232169966  | 0           | 2.633202441  | 0.503536487 | 1           | AL161734.2 |
| ENSG00000274010 | 1.232169966  | 0           | 2.633202441  | 0.503536487 | 1           | AC006011.2 |

|                 |             |             |              |             |             |            |
|-----------------|-------------|-------------|--------------|-------------|-------------|------------|
| ENSG00000248725 | 1.232169966 | 0           | 2.633202441  | 0.503536487 | 1           | AC097488.1 |
| ENSG00000215174 | 1.232169966 | 0           | 2.633202441  | 0.503536487 | 1           | NLRP2B     |
| ENSG00000162763 | 1.232169966 | 0           | 2.633202441  | 0.503536487 | 1           | LRRCS2     |
| ENSG00000128610 | 1.232169966 | 0           | 2.633202441  | 0.503536487 | 1           | FEZF1      |
| ENSG00000261596 | 1.232169966 | 0           | 2.633202441  | 0.503536487 | 1           | AC005632.2 |
| ENSG00000231035 | 1.232169966 | 0           | 2.633202441  | 0.503536487 | 1           | RPL7L1P9   |
| ENSG00000285162 | 1.232169966 | 0           | 2.633202441  | 0.503536487 | 1           | AC004593.3 |
| ENSG00000264015 | 1.232169966 | 0           | 2.633202441  | 0.503536487 | 1           | AC124254.1 |
| ENSG00000226185 | 1.232169966 | 0           | 2.633202441  | 0.503536487 | 1           | TRIM64FP   |
| ENSG00000281958 | 1.232169966 | 0           | 2.633202441  | 0.503536487 | 1           | TRBJ1-4    |
| ENSG00000287464 | 1.232169966 | 0           | 2.633202441  | 0.503536487 | 1           | AC100810.7 |
| ENSG00000285082 | 1.232169966 | 0           | 2.633202441  | 0.503536487 | 1           | AL160272.2 |
| ENSG00000286497 | 1.232169966 | 0           | 2.633202441  | 0.503536487 | 1           | AP001924.2 |
| ENSG00000269256 | 1.232169966 | 0           | 2.633202441  | 0.503536487 | 1           | AC024603.1 |
| ENSG00000211851 | 1.232169966 | 0           | 2.633202441  | 0.503536487 | 1           | TRAJ38     |
| ENSG00000280078 | 1.232169966 | 0           | 2.633202441  | 0.503536487 | 1           | AC016526.3 |
| ENSG00000249231 | 1.232169966 | 0           | 2.633202441  | 0.503536487 | 1           | CASC16     |
| ENSG00000184650 | 1.232169966 | 0           | 2.633202441  | 0.503536487 | 1           | ODF4       |
| ENSG00000279431 | 1.232169966 | 0           | 2.633202441  | 0.503536487 | 1           | AC011840.5 |
| ENSG00000257949 | 1.232169966 | 0           | 2.633202441  | 0.503536487 | 1           | TEN1       |
| ENSG00000223750 | 1.232169966 | 0           | 2.633202441  | 0.503536487 | 1           | SIRPB3P    |
| ENSG00000266226 | 1.232169966 | 0           | 2.633202441  | 0.503536487 | 1           | MIR4323    |
| ENSG00000164078 | 11.70978899 | 7.390441412 | 0.659994058  | 0.503559208 | 0.624396114 | MST1R      |
| ENSG00000075945 | 592.4746154 | 542.1650805 | 0.127696914  | 0.503616458 | 0.624424563 | KIFAP3     |
| ENSG00000130513 | 693.0779122 | 1038.287171 | -0.583129924 | 0.503630219 | 0.624424563 | GDF15      |
| ENSG00000159208 | 75.7549482  | 62.33588407 | 0.281846158  | 0.503714053 | 0.624459984 | CIART      |
| ENSG00000108588 | 1704.992092 | 1862.242147 | -0.127271315 | 0.503716704 | 0.624459984 | CCDC47     |
| ENSG00000287001 | 9.804421397 | 5.369310161 | 0.866359415  | 0.503730894 | 0.624459984 | AC010624.5 |
| ENSG00000100897 | 80.20302303 | 61.82803929 | 0.375328417  | 0.503878165 | 0.624612749 | DCAF11     |
| ENSG00000228063 | 13.1447942  | 8.875520481 | 0.574206195  | 0.50390257  | 0.6246132   | LYPLAL1-DT |
| ENSG00000278831 | 7.156193493 | 3.780161198 | 0.93708386   | 0.50394546  | 0.624636563 | AL513190.1 |
| ENSG00000106829 | 208.4198307 | 255.760177  | -0.295971692 | 0.503969699 | 0.624636807 | TLE4       |
| ENSG00000196850 | 521.0670937 | 586.0466745 | -0.169475738 | 0.504022993 | 0.624673062 | PPTC7      |
| ENSG00000286070 | 4.539734085 | 2.598430319 | 0.822093988  | 0.504190231 | 0.624850525 | GGT1       |
| ENSG00000280953 | 1.229662669 | 0           | 2.630471519  | 0.50419338  | 1           | LINC01163  |
| ENSG00000175344 | 1.229662669 | 0           | 2.630471519  | 0.50419338  | 1           | CHRNA7     |
| novel.674       | 1.229662669 | 0           | 2.630471519  | 0.50419338  | 1           | -          |
| ENSG00000272912 | 1.229662669 | 0           | 2.630471519  | 0.50419338  | 1           | AL356608.1 |
| ENSG00000274066 | 1.229662669 | 0           | 2.630471519  | 0.50419338  | 1           | MIR6514    |
| ENSG00000253502 | 1.229662669 | 0           | 2.630471519  | 0.50419338  | 1           | ATP6V1G1P2 |
| ENSG00000184302 | 1.229662669 | 0           | 2.630471519  | 0.50419338  | 1           | SIX6       |
| ENSG00000272763 | 1.229662669 | 0           | 2.630471519  | 0.50419338  | 1           | AC103702.2 |
| ENSG00000236564 | 1.229662669 | 0           | 2.630471519  | 0.50419338  | 1           | YWHAQP5    |
| ENSG00000241529 | 1.229662669 | 0           | 2.630471519  | 0.50419338  | 1           | RN7SL767P  |
| ENSG00000286377 | 1.229662669 | 0           | 2.630471519  | 0.50419338  | 1           | AC114964.2 |
| ENSG00000260762 | 1.229662669 | 0           | 2.630471519  | 0.50419338  | 1           | ACSM5P1    |
| ENSG00000224794 | 1.229662669 | 0           | 2.630471519  | 0.50419338  | 1           | AL022326.1 |
| ENSG00000253832 | 1.229662669 | 0           | 2.630471519  | 0.50419338  | 1           | AC107373.1 |
| ENSG00000262061 | 1.229662669 | 0           | 2.630471519  | 0.50419338  | 1           | AC129507.1 |
| ENSG00000176840 | 1.229662669 | 0           | 2.630471519  | 0.50419338  | 1           | MIR7-3HG   |
| ENSG00000228196 | 1.229662669 | 0           | 2.630471519  | 0.50419338  | 1           | PTPN2P1    |

|                 |             |             |              |             |             |            |
|-----------------|-------------|-------------|--------------|-------------|-------------|------------|
| ENSG00000226409 | 1.229662669 | 0           | 2.630471519  | 0.50419338  | 1           | AL450332.1 |
| ENSG00000211688 | 1.229662669 | 0           | 2.630471519  | 0.50419338  | 1           | TRGJP2     |
| ENSG00000254028 | 1.229662669 | 0           | 2.630471519  | 0.50419338  | 1           | AC083843.2 |
| ENSG00000280134 | 1.229662669 | 0           | 2.630471519  | 0.50419338  | 1           | AL731532.2 |
| ENSG00000255882 | 1.229662669 | 0           | 2.630471519  | 0.50419338  | 1           | AC091814.1 |
| ENSG00000287923 | 1.229662669 | 0           | 2.630471519  | 0.50419338  | 1           | AL138701.1 |
| ENSG00000275674 | 1.229662669 | 0           | 2.630471519  | 0.50419338  | 1           | AC091167.6 |
| ENSG00000267653 | 1.229662669 | 0           | 2.630471519  | 0.50419338  | 1           | AC002546.1 |
| ENSG00000263637 | 1.229662669 | 0           | 2.630471519  | 0.50419338  | 1           | AC022035.1 |
| ENSG00000279599 | 1.229662669 | 0           | 2.630471519  | 0.50419338  | 1           | AC005514.1 |
| ENSG00000167769 | 1.229662669 | 0           | 2.630471519  | 0.50419338  | 1           | ACER1      |
| ENSG00000118160 | 6.679349408 | 4.351599676 | 0.62281626   | 0.504266603 | 0.624915364 | SLC8A2     |
| ENSG00000072778 | 5689.647759 | 6308.586152 | -0.14894034  | 0.504438497 | 0.625098568 | ACADVL     |
| ENSG00000283148 | 0           | 1.060160428 | -2.667304649 | 0.504463474 | 1           | AC137936.1 |
| ENSG00000259177 | 0           | 1.060160428 | -2.667304649 | 0.504463474 | 1           | AC018946.1 |
| ENSG00000275297 | 0           | 1.060160428 | -2.667304649 | 0.504463474 | 1           | AL162731.1 |
| ENSG00000212264 | 0           | 1.060160428 | -2.667304649 | 0.504463474 | 1           | SNORD65C   |
| ENSG00000268056 | 0           | 1.060160428 | -2.667304649 | 0.504463474 | 1           | AC020913.1 |
| ENSG00000235288 | 0           | 1.060160428 | -2.667304649 | 0.504463474 | 1           | AC099329.1 |
| ENSG00000276770 | 0           | 1.060160428 | -2.667304649 | 0.504463474 | 1           | MIR6780B   |
| ENSG00000267563 | 0           | 1.060160428 | -2.667304649 | 0.504463474 | 1           | AC011471.2 |
| ENSG00000233471 | 0           | 1.060160428 | -2.667304649 | 0.504463474 | 1           | KRT18P62   |
| ENSG00000279786 | 0           | 1.060160428 | -2.667304649 | 0.504463474 | 1           | AC105235.1 |
| ENSG00000122711 | 0           | 1.060160428 | -2.667304649 | 0.504463474 | 1           | SPINK4     |
| ENSG00000287022 | 0           | 1.060160428 | -2.667304649 | 0.504463474 | 1           | AC079841.2 |
| ENSG00000264099 | 0           | 1.060160428 | -2.667304649 | 0.504463474 | 1           | MIR4803    |
| ENSG00000236091 | 0           | 1.060160428 | -2.667304649 | 0.504463474 | 1           | LINC02243  |
| ENSG00000286414 | 0           | 1.060160428 | -2.667304649 | 0.504463474 | 1           | AL390791.1 |
| ENSG00000264313 | 0           | 1.060160428 | -2.667304649 | 0.504463474 | 1           | RN7SL644P  |
| ENSG00000199740 | 0           | 1.060160428 | -2.667304649 | 0.504463474 | 1           | RF00019    |
| ENSG00000279873 | 12.9482272  | 8.704483622 | 0.56394921   | 0.504478568 | 0.625118409 | LINC01126  |
| ENSG00000131233 | 2.40137241  | 0.774441189 | 1.664797008  | 0.504504877 | 0.625121194 | GJA9       |
| ENSG00000233396 | 23.41610176 | 30.55478354 | -0.389507002 | 0.504555313 | 0.625153874 | LINC01719  |
| ENSG00000100028 | 564.115189  | 633.151401  | -0.167037716 | 0.504616335 | 0.625199667 | SNRPD3     |
| ENSG00000202415 | 2.067800989 | 0.723690511 | 1.52409201   | 0.504811862 | 0.625412092 | RN7SKP269  |
| ENSG00000218226 | 13.74861351 | 19.20929126 | -0.481384802 | 0.504892781 | 0.625482517 | TATDN2P2   |
| ENSG00000173166 | 54.84673625 | 71.53875586 | -0.383830316 | 0.505018263 | 0.625580419 | RAPH1      |
| ENSG00000261842 | 2.06654734  | 0.723690511 | 1.5233437    | 0.505023935 | 0.625580419 | AC073314.1 |
| ENSG00000254689 | 2.416487466 | 1.10029862  | 1.147819961  | 0.505044043 | 0.625580419 | LINC02235  |
| ENSG00000241061 | 9.678486352 | 13.39126895 | -0.465108869 | 0.505353201 | 0.625913348 | RPL5P1     |
| ENSG00000271547 | 4.719576376 | 2.211209725 | 1.106498351  | 0.505361007 | 0.625913348 | AC117498.3 |
| novel.24        | 1.203193503 | 0           | 2.601253647  | 0.505385904 | 1           | -          |
| ENSG00000200169 | 1.203193503 | 0           | 2.601253647  | 0.505385904 | 1           | RNU5D-1    |
| ENSG00000265102 | 1.203193503 | 0           | 2.601253647  | 0.505385904 | 1           | MIR3942    |
| ENSG00000249926 | 1.203193503 | 0           | 2.601253647  | 0.505385904 | 1           | AC117500.1 |
| ENSG00000231615 | 1.203193503 | 0           | 2.601253647  | 0.505385904 | 1           | AL645668.2 |
| ENSG00000275234 | 1.203193503 | 0           | 2.601253647  | 0.505385904 | 1           | AC010503.4 |
| novel.374       | 1.203193503 | 0           | 2.601253647  | 0.505385904 | 1           | -          |
| novel.753       | 1.203193503 | 0           | 2.601253647  | 0.505385904 | 1           | -          |
| ENSG00000246790 | 1.203193503 | 0           | 2.601253647  | 0.505385904 | 1           | AP000977.1 |
| ENSG00000237742 | 1.203193503 | 0           | 2.601253647  | 0.505385904 | 1           | AL365259.1 |



|                 |             |             |              |             |             |            |
|-----------------|-------------|-------------|--------------|-------------|-------------|------------|
| ENSG00000262995 | 1.203193503 | 0           | 2.601253647  | 0.505385904 | 1           | AC137056.1 |
| ENSG00000259928 | 1.203193503 | 0           | 2.601253647  | 0.505385904 | 1           | AC011840.2 |
| ENSG00000268879 | 1.203193503 | 0           | 2.601253647  | 0.505385904 | 1           | IGFL1P1    |
| ENSG00000207087 | 1.203193503 | 0           | 2.601253647  | 0.505385904 | 1           | RNU6-242P  |
| ENSG00000254974 | 1.203193503 | 0           | 2.601253647  | 0.505385904 | 1           | AP001372.4 |
| ENSG00000213394 | 1.203193503 | 0           | 2.601253647  | 0.505385904 | 1           | RPSAP46    |
| ENSG00000259276 | 1.203193503 | 0           | 2.601253647  | 0.505385904 | 1           | AC087286.1 |
| ENSG00000244071 | 1.203193503 | 0           | 2.601253647  | 0.505385904 | 1           | RPL9P33    |
| ENSG00000226989 | 1.203193503 | 0           | 2.601253647  | 0.505385904 | 1           | AL049758.1 |
| ENSG00000235303 | 1.203193503 | 0           | 2.601253647  | 0.505385904 | 1           | AL023495.1 |
| ENSG00000248109 | 1.203193503 | 0           | 2.601253647  | 0.505385904 | 1           | MARCOL     |
| ENSG00000234394 | 1.203193503 | 0           | 2.601253647  | 0.505385904 | 1           | AL353608.3 |
| ENSG00000232215 | 1.203193503 | 0           | 2.601253647  | 0.505385904 | 1           | OR2L6P     |
| ENSG00000237217 | 1.203193503 | 0           | 2.601253647  | 0.505385904 | 1           | AC008074.1 |
| ENSG00000224442 | 1.203193503 | 0           | 2.601253647  | 0.505385904 | 1           | AC017035.1 |
| ENSG00000271131 | 1.203193503 | 0           | 2.601253647  | 0.505385904 | 1           | PPIAP75    |
| ENSG00000243584 | 1.203193503 | 0           | 2.601253647  | 0.505385904 | 1           | AC068769.1 |
| ENSG00000250342 | 1.203193503 | 0           | 2.601253647  | 0.505385904 | 1           | SNRPCP16   |
| ENSG00000139053 | 1.203193503 | 0           | 2.601253647  | 0.505385904 | 1           | AC020613.1 |
| ENSG00000232894 | 1.203193503 | 0           | 2.601253647  | 0.505385904 | 1           | MRPS31P2   |
| ENSG00000234005 | 1.203193503 | 0           | 2.601253647  | 0.505385904 | 1           | GAPDHP22   |
| ENSG00000169900 | 1.203193503 | 0           | 2.601253647  | 0.505385904 | 1           | PYDC1      |
| ENSG00000213942 | 0.308355904 | 1.682349583 | -2.376933775 | 0.505401027 | 1           | AC005840.2 |
| ENSG00000256249 | 0.308355904 | 1.682349583 | -2.376933775 | 0.505401027 | 1           | AC026333.3 |
| ENSG00000130305 | 457.0358825 | 389.3320426 | 0.230565642  | 0.505427701 | 0.625966112 | NSUN5      |
| ENSG00000235530 | 6.983944366 | 10.90392499 | -0.648044043 | 0.505466982 | 0.625984922 | AC087294.1 |
| ENSG00000275178 | 0.307102255 | 1.682349583 | -2.376931038 | 0.505477547 | 1           | AC018529.1 |
| ENSG00000206026 | 0.307102255 | 1.682349583 | -2.376931038 | 0.505477547 | 1           | SMIM21     |
| ENSG00000272386 | 5.447179442 | 3.271370153 | 0.7421568    | 0.505636951 | 0.626165568 | AC015802.5 |
| ENSG00000163041 | 3733.505785 | 3386.147016 | 0.140867806  | 0.505787316 | 0.626321923 | H3F3A      |
| ENSG00000258811 | 4.853104584 | 2.52645467  | 0.942938018  | 0.505842262 | 0.626360109 | AL583810.2 |
| ENSG00000082212 | 1342.878289 | 1198.750665 | 0.163730299  | 0.50596086  | 0.626477106 | ME2        |
| ENSG00000206832 | 1.200686205 | 0           | 2.59847183   | 0.506065453 | 1           | RNU6V      |
| ENSG00000287777 | 1.200686205 | 0           | 2.59847183   | 0.506065453 | 1           | AL161851.2 |
| ENSG00000185040 | 1.200686205 | 0           | 2.59847183   | 0.506065453 | 1           | SPDYE16    |
| ENSG00000214319 | 1.200686205 | 0           | 2.59847183   | 0.506065453 | 1           | CXADRP1    |
| ENSG00000251410 | 1.200686205 | 0           | 2.59847183   | 0.506065453 | 1           | AC007106.1 |
| ENSG00000237265 | 1.200686205 | 0           | 2.59847183   | 0.506065453 | 1           | BX276092.7 |
| ENSG00000267412 | 1.200686205 | 0           | 2.59847183   | 0.506065453 | 1           | AC092068.2 |
| ENSG00000260100 | 1.200686205 | 0           | 2.59847183   | 0.506065453 | 1           | AL512604.3 |
| ENSG00000272347 | 1.200686205 | 0           | 2.59847183   | 0.506065453 | 1           | AC116351.2 |
| ENSG00000258134 | 1.200686205 | 0           | 2.59847183   | 0.506065453 | 1           | AC016954.1 |
| ENSG00000270218 | 1.200686205 | 0           | 2.59847183   | 0.506065453 | 1           | AC013553.2 |
| ENSG00000213754 | 1.200686205 | 0           | 2.59847183   | 0.506065453 | 1           | AL356317.1 |
| ENSG00000227203 | 1.200686205 | 0           | 2.59847183   | 0.506065453 | 1           | SUB1P1     |
| ENSG00000256902 | 1.200686205 | 0           | 2.59847183   | 0.506065453 | 1           | IQSEC3P1   |
| ENSG00000260141 | 1.200686205 | 0           | 2.59847183   | 0.506065453 | 1           | AC145350.2 |
| ENSG00000140955 | 1.200686205 | 0           | 2.59847183   | 0.506065453 | 1           | ADAD2      |
| ENSG00000211644 | 1.200686205 | 0           | 2.59847183   | 0.506065453 | 1           | IGLV1-51   |
| ENSG00000286543 | 1.200686205 | 0           | 2.59847183   | 0.506065453 | 1           | AC138409.3 |
| ENSG00000261404 | 1.200686205 | 0           | 2.59847183   | 0.506065453 | 1           | AC138627.1 |

|                 |             |             |              |             |             |             |
|-----------------|-------------|-------------|--------------|-------------|-------------|-------------|
| ENSG00000178115 | 1.200686205 | 0           | 2.59847183   | 0.506065453 | 1           | GOLGA8Q     |
| ENSG00000259534 | 1.200686205 | 0           | 2.59847183   | 0.506065453 | 1           | AC087477.4  |
| ENSG00000207053 | 1.200686205 | 0           | 2.59847183   | 0.506065453 | 1           | RNU6-937P   |
| ENSG00000252784 | 1.200686205 | 0           | 2.59847183   | 0.506065453 | 1           | RF00019     |
| ENSG00000230274 | 1.200686205 | 0           | 2.59847183   | 0.506065453 | 1           | PGAM1P3     |
| ENSG00000285978 | 1.200686205 | 0           | 2.59847183   | 0.506065453 | 1           | AC113348.2  |
| ENSG00000276963 | 1.200686205 | 0           | 2.59847183   | 0.506065453 | 1           | AL353626.3  |
| ENSG00000255580 | 1.200686205 | 0           | 2.59847183   | 0.506065453 | 1           | AP000462.1  |
| ENSG00000173239 | 1.200686205 | 0           | 2.59847183   | 0.506065453 | 1           | LIPM        |
| ENSG00000267717 | 1.200686205 | 0           | 2.59847183   | 0.506065453 | 1           | SRSF10P1    |
| ENSG00000235914 | 1.200686205 | 0           | 2.59847183   | 0.506065453 | 1           | MACROD2-AS1 |
| ENSG00000260646 | 1.789675198 | 3.668047357 | -1.023750071 | 0.506084979 | 0.626600927 | AL031705.1  |
| ENSG00000233436 | 3.842361131 | 1.773238453 | 1.115174252  | 0.506143129 | 0.626641986 | BTBD18      |
| ENSG00000268471 | 77.10936353 | 65.47609877 | 0.23750408   | 0.50616638  | 0.626641986 | MIR4453HG   |
| ENSG00000183778 | 4.923665269 | 2.51699806  | 0.965577026  | 0.506224513 | 0.626684094 | B3GALT5     |
| ENSG00000270299 | 0.293240848 | 1.682349583 | -2.376900719 | 0.506326753 | 1           | AL121758.1  |
| ENSG00000204560 | 0.293240848 | 1.682349583 | -2.376900719 | 0.506326753 | 1           | DHX16       |
| ENSG00000185896 | 8554.976961 | 9441.534824 | -0.142235721 | 0.506342263 | 0.626779645 | LAMP1       |
| ENSG00000212371 | 3.357923882 | 1.793307549 | 0.901384329  | 0.506349947 | 0.626779645 | RF00404     |
| ENSG00000276116 | 24.97181396 | 16.7817694  | 0.579142231  | 0.506459296 | 0.626885134 | FUT8-AS1    |
| ENSG00000274677 | 1.203193503 | 2.51699806  | -1.060786137 | 0.506536057 | 0.626950278 | AC040169.3  |
| ENSG00000273133 | 1.817398012 | 0.672939833 | 1.393598151  | 0.506564652 | 1           | AC116651.1  |
| ENSG00000279075 | 0           | 1.049547942 | -2.654588449 | 0.506580726 | 1           | AC091965.5  |
| ENSG00000185269 | 0           | 1.049547942 | -2.654588449 | 0.506580726 | 1           | NOTUM       |
| ENSG00000267255 | 0           | 1.049547942 | -2.654588449 | 0.506580726 | 1           | AC011498.3  |
| ENSG00000272159 | 0           | 1.049547942 | -2.654588449 | 0.506580726 | 1           | AC087623.3  |
| ENSG00000276045 | 0           | 1.049547942 | -2.654588449 | 0.506580726 | 1           | ORAI1       |
| ENSG00000278462 | 0           | 1.049547942 | -2.654588449 | 0.506580726 | 1           | AL359880.1  |
| ENSG00000243870 | 0           | 1.049547942 | -2.654588449 | 0.506580726 | 1           | RN7SL236P   |
| ENSG00000223825 | 0           | 1.049547942 | -2.654588449 | 0.506580726 | 1           | DAZAP2P1    |
| ENSG00000250234 | 0           | 1.049547942 | -2.654588449 | 0.506580726 | 1           | AC025754.1  |
| ENSG00000231464 | 0           | 1.049547942 | -2.654588449 | 0.506580726 | 1           | AC024937.2  |
| ENSG00000279315 | 0           | 1.049547942 | -2.654588449 | 0.506580726 | 1           | AL158212.4  |
| ENSG00000256108 | 0           | 1.049547942 | -2.654588449 | 0.506580726 | 1           | AC135586.1  |
| ENSG00000285155 | 0           | 1.049547942 | -2.654588449 | 0.506580726 | 1           | AC092153.1  |
| ENSG00000183671 | 0           | 1.049547942 | -2.654588449 | 0.506580726 | 1           | GPR1        |
| ENSG00000248370 | 0           | 1.049547942 | -2.654588449 | 0.506580726 | 1           | LINC02434   |
| ENSG00000286522 | 0           | 1.049547942 | -2.654588449 | 0.506580726 | 1           | HIST1H3B    |
| ENSG00000236654 | 0           | 1.049547942 | -2.654588449 | 0.506580726 | 1           | AC079780.1  |
| ENSG00000254294 | 0           | 1.049547942 | -2.654588449 | 0.506580726 | 1           | IMPDH1P6    |
| ENSG00000213761 | 0           | 1.049547942 | -2.654588449 | 0.506580726 | 1           | MT1P1       |
| ENSG00000213538 | 0           | 1.049547942 | -2.654588449 | 0.506580726 | 1           | KRT8P41     |
| ENSG00000255327 | 0           | 1.049547942 | -2.654588449 | 0.506580726 | 1           | AP003062.1  |
| ENSG00000131982 | 0           | 1.049547942 | -2.654588449 | 0.506580726 | 1           | UBE2L2      |
| ENSG00000257259 | 0           | 1.049547942 | -2.654588449 | 0.506580726 | 1           | LINC02388   |
| ENSG00000213641 | 0           | 1.049547942 | -2.654588449 | 0.506580726 | 1           | RPL7AP4     |
| ENSG00000275084 | 0           | 1.049547942 | -2.654588449 | 0.506580726 | 1           | SNORD91B    |
| ENSG00000204880 | 0           | 1.049547942 | -2.654588449 | 0.506580726 | 1           | KRTAP4-8    |
| ENSG00000264596 | 0           | 1.049547942 | -2.654588449 | 0.506580726 | 1           | AP000897.1  |
| ENSG00000100121 | 0           | 1.049547942 | -2.654588449 | 0.506580726 | 1           | GGTLC2      |
| ENSG00000259727 | 1.774560141 | 3.577158488 | -1.002470897 | 0.506669479 | 0.627052471 | AC103740.2  |

|                 |             |             |              |             |             |            |
|-----------------|-------------|-------------|--------------|-------------|-------------|------------|
| ENSG00000112964 | 96.20746993 | 65.24382714 | 0.55932931   | 0.506670137 | 0.627052471 | GHR        |
| ENSG00000130827 | 1876.296582 | 2321.952073 | -0.307345704 | 0.506691027 | 0.627052471 | PLXNA3     |
| ENSG00000279549 | 1.802282956 | 3.718798035 | -1.033043886 | 0.506928277 | 0.627316198 | AP000437.1 |
| ENSG00000117407 | 10.95349419 | 14.78674341 | -0.433100115 | 0.507003741 | 0.6273797   | ARTN       |
| ENSG00000224155 | 1.54052587  | 3.280826763 | -1.093849693 | 0.507088312 | 0.627454467 | AC073136.2 |
| ENSG00000111218 | 1.233423615 | 0           | 2.634600049  | 0.507112431 | 1           | PRMT8      |
| ENSG00000250381 | 1.233423615 | 0           | 2.634600049  | 0.507112431 | 1           | UNC93B4    |
| ENSG00000143768 | 1.233423615 | 0           | 2.634600049  | 0.507112431 | 1           | LEFTY2     |
| ENSG00000171133 | 1.233423615 | 0           | 2.634600049  | 0.507112431 | 1           | OR2K2      |
| ENSG00000186049 | 1.233423615 | 0           | 2.634600049  | 0.507112431 | 1           | KRT73      |
| ENSG00000286044 | 1.233423615 | 0           | 2.634600049  | 0.507112431 | 1           | AP001977.1 |
| ENSG00000133710 | 1.233423615 | 0           | 2.634600049  | 0.507112431 | 1           | SPINK5     |
| ENSG00000279726 | 1.233423615 | 0           | 2.634600049  | 0.507112431 | 1           | AC005609.5 |
| ENSG00000116176 | 1.233423615 | 0           | 2.634600049  | 0.507112431 | 1           | TPSG1      |
| ENSG00000235947 | 1.233423615 | 0           | 2.634600049  | 0.507112431 | 1           | EGOT       |
| ENSG00000285336 | 1.233423615 | 0           | 2.634600049  | 0.507112431 | 1           | AC108734.4 |
| ENSG00000254573 | 1.233423615 | 0           | 2.634600049  | 0.507112431 | 1           | AP004550.1 |
| ENSG00000225986 | 1.233423615 | 0           | 2.634600049  | 0.507112431 | 1           | UBXN10-AS1 |
| ENSG00000278973 | 1.233423615 | 0           | 2.634600049  | 0.507112431 | 1           | AC073592.2 |
| ENSG00000229282 | 1.233423615 | 0           | 2.634600049  | 0.507112431 | 1           | AL031963.2 |
| ENSG00000197360 | 1.233423615 | 0           | 2.634600049  | 0.507112431 | 1           | ZNF98      |
| ENSG00000272856 | 1.233423615 | 0           | 2.634600049  | 0.507112431 | 1           | AC112250.2 |
| ENSG00000200378 | 1.233423615 | 0           | 2.634600049  | 0.507112431 | 1           | RNU5B-4P   |
| ENSG00000227917 | 1.233423615 | 0           | 2.634600049  | 0.507112431 | 1           | AL449043.1 |
| ENSG00000280032 | 1.233423615 | 0           | 2.634600049  | 0.507112431 | 1           | AP002800.1 |
| ENSG00000234919 | 1.233423615 | 0           | 2.634600049  | 0.507112431 | 1           | LINC01827  |
| ENSG00000237626 | 1.233423615 | 0           | 2.634600049  | 0.507112431 | 1           | AL161629.1 |
| ENSG00000196242 | 1.233423615 | 0           | 2.634600049  | 0.507112431 | 1           | OR2C3      |
| ENSG00000186212 | 1.233423615 | 0           | 2.634600049  | 0.507112431 | 1           | SOWAHB     |
| ENSG00000221970 | 1.233423615 | 0           | 2.634600049  | 0.507112431 | 1           | OR2A1      |
| ENSG00000259444 | 1.233423615 | 0           | 2.634600049  | 0.507112431 | 1           | AL161669.1 |
| ENSG00000129455 | 1.233423615 | 0           | 2.634600049  | 0.507112431 | 1           | KLK8       |
| ENSG00000201620 | 1.233423615 | 0           | 2.634600049  | 0.507112431 | 1           | RNA5SP51   |
| ENSG00000286525 | 1.233423615 | 0           | 2.634600049  | 0.507112431 | 1           | AC023787.2 |
| ENSG00000249934 | 1.233423615 | 0           | 2.634600049  | 0.507112431 | 1           | NCOA4P2    |
| ENSG00000285424 | 1.233423615 | 0           | 2.634600049  | 0.507112431 | 1           | AL162718.1 |
| ENSG00000231912 | 1.233423615 | 0           | 2.634600049  | 0.507112431 | 1           | FO393415.3 |
| ENSG00000231956 | 1.233423615 | 0           | 2.634600049  | 0.507112431 | 1           | HNRNPA1P9  |
| ENSG00000231705 | 1.233423615 | 0           | 2.634600049  | 0.507112431 | 1           | AL451069.2 |
| ENSG00000188991 | 1.233423615 | 0           | 2.634600049  | 0.507112431 | 1           | SLC15A5    |
| ENSG00000089116 | 1.233423615 | 0           | 2.634600049  | 0.507112431 | 1           | LHX5       |
| ENSG00000276240 | 1.233423615 | 0           | 2.634600049  | 0.507112431 | 1           | OR4E1      |
| ENSG00000167654 | 1.233423615 | 0           | 2.634600049  | 0.507112431 | 1           | ATCAY      |
| ENSG00000162365 | 1.233423615 | 0           | 2.634600049  | 0.507112431 | 1           | CYP4A22    |
| ENSG00000234177 | 1.233423615 | 0           | 2.634600049  | 0.507112431 | 1           | LINC01114  |
| ENSG00000253490 | 1.233423615 | 0           | 2.634600049  | 0.507112431 | 1           | LINC02099  |
| ENSG00000255583 | 1.233423615 | 0           | 2.634600049  | 0.507112431 | 1           | AC084357.3 |
| ENSG00000211810 | 1.233423615 | 0           | 2.634600049  | 0.507112431 | 1           | TRAV29DV5  |
| ENSG00000211882 | 1.233423615 | 0           | 2.634600049  | 0.507112431 | 1           | TRAJ7      |
| ENSG00000240457 | 1.233423615 | 0           | 2.634600049  | 0.507112431 | 1           | RN7SL472P  |
| ENSG00000274478 | 1.233423615 | 0           | 2.634600049  | 0.507112431 | 1           | AC009154.2 |

|                 |             |             |              |             |             |              |
|-----------------|-------------|-------------|--------------|-------------|-------------|--------------|
| ENSG00000271532 | 1.233423615 | 0           | 2.634600049  | 0.507112431 | 1           | BBIP1P1      |
| ENSG00000287992 | 1.233423615 | 0           | 2.634600049  | 0.507112431 | 1           | AL357513.1   |
| ENSG00000009765 | 1.233423615 | 0           | 2.634600049  | 0.507112431 | 1           | IYD          |
| ENSG00000234710 | 1.233423615 | 0           | 2.634600049  | 0.507112431 | 1           | AC060834.2   |
| ENSG00000205628 | 1.233423615 | 0           | 2.634600049  | 0.507112431 | 1           | LINC01446    |
| ENSG00000226660 | 1.233423615 | 0           | 2.634600049  | 0.507112431 | 1           | TRBV2        |
| ENSG00000157219 | 1.233423615 | 0           | 2.634600049  | 0.507112431 | 1           | HTR5A        |
| ENSG00000223418 | 1.233423615 | 0           | 2.634600049  | 0.507112431 | 1           | AC004554.1   |
| ENSG00000187893 | 1.233423615 | 0           | 2.634600049  | 0.507112431 | 1           | CXXC1P1      |
| ENSG00000213338 | 1.233423615 | 0           | 2.634600049  | 0.507112431 | 1           | ATF4P1       |
| ENSG00000253911 | 1.233423615 | 0           | 2.634600049  | 0.507112431 | 1           | AP003467.1   |
| ENSG00000278122 | 1.233423615 | 0           | 2.634600049  | 0.507112431 | 1           | AQP7P5       |
| ENSG00000176893 | 1.233423615 | 0           | 2.634600049  | 0.507112431 | 1           | OR51G2       |
| ENSG00000255671 | 1.233423615 | 0           | 2.634600049  | 0.507112431 | 1           | AC007406.1   |
| ENSG00000167580 | 1.233423615 | 0           | 2.634600049  | 0.507112431 | 1           | AQP2         |
| ENSG00000279444 | 1.233423615 | 0           | 2.634600049  | 0.507112431 | 1           | AC135584.1   |
| ENSG00000211933 | 1.233423615 | 0           | 2.634600049  | 0.507112431 | 1           | IGHV6-1      |
| ENSG00000273172 | 1.233423615 | 0           | 2.634600049  | 0.507112431 | 1           | LINC02091    |
| ENSG00000177338 | 1.233423615 | 0           | 2.634600049  | 0.507112431 | 1           | LINC00469    |
| ENSG00000141977 | 1.233423615 | 0           | 2.634600049  | 0.507112431 | 1           | CIB3         |
| ENSG00000221857 | 1.233423615 | 0           | 2.634600049  | 0.507112431 | 1           | AC020907.2   |
| ENSG00000283567 | 1.233423615 | 0           | 2.634600049  | 0.507112431 | 1           | C19orf85     |
| ENSG00000259271 | 1.233423615 | 0           | 2.634600049  | 0.507112431 | 1           | ANKRD62P1    |
| ENSG00000287225 | 1.233423615 | 0           | 2.634600049  | 0.507112431 | 1           | Z84468.2     |
| ENSG00000227630 | 3.049567979 | 1.4981317   | 1.046253511  | 0.507171256 | 0.627527213 | LINC01132    |
| ENSG00000232283 | 1.218308559 | 0           | 2.617990194  | 0.507192273 | 1           | HSD17B3-AS1  |
| ENSG00000162747 | 1.218308559 | 0           | 2.617990194  | 0.507192273 | 1           | FCGR3B       |
| ENSG00000187690 | 1.218308559 | 0           | 2.617990194  | 0.507192273 | 1           | EZH1P        |
| ENSG00000235862 | 1.218308559 | 0           | 2.617990194  | 0.507192273 | 1           | AL590648.2   |
| ENSG00000227242 | 1.218308559 | 0           | 2.617990194  | 0.507192273 | 1           | NBPF13P      |
| ENSG00000286809 | 1.218308559 | 0           | 2.617990194  | 0.507192273 | 1           | AC008964.1   |
| ENSG00000188467 | 1.218308559 | 0           | 2.617990194  | 0.507192273 | 1           | SLC24A5      |
| ENSG00000286447 | 1.218308559 | 0           | 2.617990194  | 0.507192273 | 1           | AC109782.1   |
| ENSG00000253542 | 1.218308559 | 0           | 2.617990194  | 0.507192273 | 1           | SDR16C6P     |
| ENSG00000283526 | 1.218308559 | 0           | 2.617990194  | 0.507192273 | 1           | PRRT1B       |
| ENSG00000238741 | 1.218308559 | 0           | 2.617990194  | 0.507192273 | 1           | SCARNA7      |
| ENSG00000227471 | 1.218308559 | 0           | 2.617990194  | 0.507192273 | 1           | AKR1B15      |
| ENSG00000285768 | 1.218308559 | 0           | 2.617990194  | 0.507192273 | 1           | AC232323.2   |
| ENSG00000215325 | 1.218308559 | 0           | 2.617990194  | 0.507192273 | 1           | ASS1P10      |
| ENSG00000255260 | 1.218308559 | 0           | 2.617990194  | 0.507192273 | 1           | KC877392.1   |
| ENSG00000187980 | 1.218308559 | 0           | 2.617990194  | 0.507192273 | 1           | PLA2G2C      |
| ENSG00000237861 | 1.218308559 | 0           | 2.617990194  | 0.507192273 | 1           | AL513325.1   |
| ENSG00000231086 | 1.218308559 | 0           | 2.617990194  | 0.507192273 | 1           | TSSK1A       |
| ENSG00000228982 | 1.218308559 | 0           | 2.617990194  | 0.507192273 | 1           | AL627095.1   |
| ENSG00000233999 | 1.218308559 | 0           | 2.617990194  | 0.507192273 | 1           | IGKV3OR2-268 |
| ENSG00000226734 | 1.218308559 | 0           | 2.617990194  | 0.507192273 | 1           | SNRPGP12     |
| ENSG00000256803 | 1.218308559 | 0           | 2.617990194  | 0.507192273 | 1           | AC024224.2   |
| ENSG00000265272 | 1.218308559 | 0           | 2.617990194  | 0.507192273 | 1           | RN7SL693P    |
| ENSG00000261302 | 0.601596751 | 1.733100261 | -1.532229054 | 0.507328174 | 1           | AC106779.1   |
| ENSG00000213368 | 0.601596751 | 1.733100261 | -1.532229054 | 0.507328174 | 1           | ST13P11      |
| ENSG00000177174 | 0.908699006 | 0           | 2.195514107  | 0.507338332 | 1           | OR14C36      |

|                 |             |             |              |             |             |            |
|-----------------|-------------|-------------|--------------|-------------|-------------|------------|
| ENSG00000284934 | 0.908699006 | 0           | 2.195514107  | 0.507338332 | 1           | DIABLO     |
| ENSG00000284690 | 0.908699006 | 0           | 2.195514107  | 0.507338332 | 1           | CD300H     |
| ENSG00000180988 | 0.908699006 | 0           | 2.195514107  | 0.507338332 | 1           | OR52N2     |
| ENSG00000080511 | 0.908699006 | 0           | 2.195514107  | 0.507338332 | 1           | RDH8       |
| ENSG00000106631 | 0.908699006 | 0           | 2.195514107  | 0.507338332 | 1           | MYL7       |
| ENSG00000267783 | 0.908699006 | 0           | 2.195514107  | 0.507338332 | 1           | AC022098.3 |
| ENSG00000229537 | 0.908699006 | 0           | 2.195514107  | 0.507338332 | 1           | LINC01739  |
| ENSG00000135697 | 0.908699006 | 0           | 2.195514107  | 0.507338332 | 1           | BCO1       |
| ENSG00000267222 | 0.908699006 | 0           | 2.195514107  | 0.507338332 | 1           | AC107993.1 |
| ENSG00000122375 | 0.908699006 | 0           | 2.195514107  | 0.507338332 | 1           | OPN4       |
| ENSG00000278725 | 0.908699006 | 0           | 2.195514107  | 0.507338332 | 1           | AC020765.4 |
| ENSG00000207789 | 0.908699006 | 0           | 2.195514107  | 0.507338332 | 1           | MIR26A2    |
| ENSG00000214360 | 0.908699006 | 0           | 2.195514107  | 0.507338332 | 1           | EFCAB9     |
| ENSG00000286088 | 0.908699006 | 0           | 2.195514107  | 0.507338332 | 1           | AC073585.2 |
| ENSG00000258854 | 0.908699006 | 0           | 2.195514107  | 0.507338332 | 1           | AL358333.1 |
| ENSG00000138316 | 36.95289067 | 53.74094575 | -0.538659992 | 0.507378449 | 0.627747888 | ADAMTS14   |
| ENSG00000108100 | 1531.247545 | 1380.322122 | 0.149655648  | 0.507397931 | 0.627747888 | CCNY       |
| ENSG00000102882 | 1627.103252 | 1449.450215 | 0.166919841  | 0.507474077 | 0.6278122   | MAPK3      |
| ENSG00000268650 | 1.200686205 | 2.996263399 | -1.307506041 | 0.50797353  | 0.628400165 | AC005759.2 |
| ENSG00000207034 | 2.391271949 | 0.774441189 | 1.659005297  | 0.508016239 | 0.628423078 | RF00019    |
| ENSG00000166527 | 1.22840902  | 0           | 2.62912762   | 0.508021235 | 1           | CLEC4D     |
| ENSG00000253361 | 1.22840902  | 0           | 2.62912762   | 0.508021235 | 1           | AC069120.1 |
| ENSG00000251409 | 1.22840902  | 0           | 2.62912762   | 0.508021235 | 1           | AC008592.4 |
| ENSG00000271338 | 1.22840902  | 0           | 2.62912762   | 0.508021235 | 1           | AL591034.2 |
| ENSG00000271725 | 1.22840902  | 0           | 2.62912762   | 0.508021235 | 1           | AC103858.1 |
| ENSG00000203307 | 1.22840902  | 0           | 2.62912762   | 0.508021235 | 1           | AL626787.1 |
| ENSG00000287349 | 1.22840902  | 0           | 2.62912762   | 0.508021235 | 1           | AC108477.2 |
| ENSG00000267207 | 1.22840902  | 0           | 2.62912762   | 0.508021235 | 1           | AC005884.1 |
| ENSG00000286880 | 1.22840902  | 0           | 2.62912762   | 0.508021235 | 1           | AC005258.2 |
| ENSG00000235749 | 1.22840902  | 0           | 2.62912762   | 0.508021235 | 1           | AL390860.1 |
| ENSG00000248152 | 1.22840902  | 0           | 2.62912762   | 0.508021235 | 1           | AC093879.1 |
| ENSG00000232678 | 1.22840902  | 0           | 2.62912762   | 0.508021235 | 1           | SPTLC1P4   |
| ENSG00000255504 | 1.22840902  | 0           | 2.62912762   | 0.508021235 | 1           | AP001533.1 |
| ENSG00000258337 | 1.22840902  | 0           | 2.62912762   | 0.508021235 | 1           | AC130895.1 |
| ENSG00000201524 | 1.22840902  | 0           | 2.62912762   | 0.508021235 | 1           | RNU6-450P  |
| ENSG00000164123 | 1.22840902  | 0           | 2.62912762   | 0.508021235 | 1           | C4orf45    |
| ENSG00000271766 | 1.22840902  | 0           | 2.62912762   | 0.508021235 | 1           | AC010424.2 |
| ENSG00000259195 | 1.22840902  | 0           | 2.62912762   | 0.508021235 | 1           | AC021739.1 |
| novel.568       | 1.22840902  | 0           | 2.62912762   | 0.508021235 | 1           | -          |
| ENSG00000284640 | 1.22840902  | 0           | 2.62912762   | 0.508021235 | 1           | AL590434.1 |
| ENSG00000287683 | 1.22840902  | 0           | 2.62912762   | 0.508021235 | 1           | AL591519.1 |
| ENSG00000244131 | 1.22840902  | 0           | 2.62912762   | 0.508021235 | 1           | RPSAP51    |
| ENSG00000280097 | 1.22840902  | 0           | 2.62912762   | 0.508021235 | 1           | AC073592.8 |
| ENSG00000260972 | 1.22840902  | 0           | 2.62912762   | 0.508021235 | 1           | Z98259.1   |
| ENSG00000131914 | 1.22840902  | 0           | 2.62912762   | 0.508021235 | 1           | LIN28A     |
| ENSG00000283414 | 1.22840902  | 0           | 2.62912762   | 0.508021235 | 1           | RF00026    |
| ENSG00000198797 | 1.22840902  | 0           | 2.62912762   | 0.508021235 | 1           | BRINP2     |
| ENSG00000286645 | 1.22840902  | 0           | 2.62912762   | 0.508021235 | 1           | AC013267.2 |
| ENSG00000226782 | 1.22840902  | 0           | 2.62912762   | 0.508021235 | 1           | AC117465.1 |
| ENSG00000251283 | 1.22840902  | 0           | 2.62912762   | 0.508021235 | 1           | LINC02272  |
| ENSG00000249198 | 1.22840902  | 0           | 2.62912762   | 0.508021235 | 1           | AC106822.1 |

|                 |             |             |             |             |             |             |
|-----------------|-------------|-------------|-------------|-------------|-------------|-------------|
| ENSG00000248846 | 1.22840902  | 0           | 2.62912762  | 0.508021235 | 1           | LINC02065   |
| ENSG00000251613 | 1.22840902  | 0           | 2.62912762  | 0.508021235 | 1           | AC063979.2  |
| ENSG00000279558 | 1.22840902  | 0           | 2.62912762  | 0.508021235 | 1           | AC244517.9  |
| ENSG00000113303 | 1.22840902  | 0           | 2.62912762  | 0.508021235 | 1           | BTNL8       |
| ENSG00000222321 | 1.22840902  | 0           | 2.62912762  | 0.508021235 | 1           | MIR1912     |
| ENSG00000223394 | 1.22840902  | 0           | 2.62912762  | 0.508021235 | 1           | TRBV29OR9-2 |
| ENSG00000231799 | 1.22840902  | 0           | 2.62912762  | 0.508021235 | 1           | PA2G4P6     |
| ENSG00000187616 | 1.22840902  | 0           | 2.62912762  | 0.508021235 | 1           | MYMK        |
| ENSG00000255519 | 1.22840902  | 0           | 2.62912762  | 0.508021235 | 1           | AC103855.4  |
| ENSG00000225424 | 1.22840902  | 0           | 2.62912762  | 0.508021235 | 1           | AL391869.1  |
| ENSG00000257241 | 1.22840902  | 0           | 2.62912762  | 0.508021235 | 1           | AC078922.1  |
| ENSG00000258837 | 1.22840902  | 0           | 2.62912762  | 0.508021235 | 1           | AL133370.1  |
| ENSG00000260722 | 1.22840902  | 0           | 2.62912762  | 0.508021235 | 1           | VN1R67P     |
| ENSG00000267496 | 1.22840902  | 0           | 2.62912762  | 0.508021235 | 1           | FAM215A     |
| ENSG00000277975 | 1.22840902  | 0           | 2.62912762  | 0.508021235 | 1           | CSTP2       |
| ENSG00000274173 | 1.22840902  | 0           | 2.62912762  | 0.508021235 | 1           | AL035661.1  |
| ENSG00000267736 | 1.22840902  | 0           | 2.62912762  | 0.508021235 | 1           | HMGB2P1     |
| ENSG00000236532 | 1.22840902  | 0           | 2.62912762  | 0.508021235 | 1           | LINC01695   |
| ENSG00000231324 | 1.22840902  | 0           | 2.62912762  | 0.508021235 | 1           | AP000696.1  |
| ENSG00000231993 | 6.584826854 | 3.872334337 | 0.760536139 | 0.508121697 | 0.628523606 | EP300-AS1   |
| ENSG00000249976 | 1.214547612 | 0           | 2.61385118  | 0.508191709 | 1           | AC108157.1  |
| ENSG00000270052 | 1.214547612 | 0           | 2.61385118  | 0.508191709 | 1           | BX546450.2  |
| ENSG00000264569 | 1.214547612 | 0           | 2.61385118  | 0.508191709 | 1           | DCXR-DT     |
| ENSG00000227933 | 1.214547612 | 0           | 2.61385118  | 0.508191709 | 1           | AL357874.1  |
| ENSG00000248234 | 1.214547612 | 0           | 2.61385118  | 0.508191709 | 1           | AC091839.1  |
| ENSG00000235522 | 1.214547612 | 0           | 2.61385118  | 0.508191709 | 1           | AC010978.1  |
| ENSG00000270941 | 1.214547612 | 0           | 2.61385118  | 0.508191709 | 1           | AC006254.2  |
| ENSG00000152591 | 1.214547612 | 0           | 2.61385118  | 0.508191709 | 1           | DSPP        |
| ENSG00000231049 | 1.214547612 | 0           | 2.61385118  | 0.508191709 | 1           | OR52B5P     |
| ENSG00000286087 | 1.214547612 | 0           | 2.61385118  | 0.508191709 | 1           | AL133331.1  |
| ENSG00000235440 | 1.214547612 | 0           | 2.61385118  | 0.508191709 | 1           | AC011742.3  |
| ENSG00000217684 | 1.214547612 | 0           | 2.61385118  | 0.508191709 | 1           | RPS3AP24    |
| ENSG00000147804 | 1.214547612 | 0           | 2.61385118  | 0.508191709 | 1           | SLC39A4     |
| ENSG00000236567 | 1.214547612 | 0           | 2.61385118  | 0.508191709 | 1           | TCF3P1      |
| ENSG00000232554 | 1.214547612 | 0           | 2.61385118  | 0.508191709 | 1           | RSU1P2      |
| ENSG00000227877 | 1.214547612 | 0           | 2.61385118  | 0.508191709 | 1           | MRLN        |
| ENSG00000269242 | 1.214547612 | 0           | 2.61385118  | 0.508191709 | 1           | AC010422.3  |
| ENSG00000286611 | 1.214547612 | 0           | 2.61385118  | 0.508191709 | 1           | AC007405.4  |
| ENSG00000248229 | 1.214547612 | 0           | 2.61385118  | 0.508191709 | 1           | AC106872.4  |
| ENSG00000265888 | 1.214547612 | 0           | 2.61385118  | 0.508191709 | 1           | DSCAS       |
| ENSG00000271252 | 1.214547612 | 0           | 2.61385118  | 0.508191709 | 1           | AL683887.1  |
| ENSG00000286015 | 1.214547612 | 0           | 2.61385118  | 0.508191709 | 1           | CR589904.2  |
| ENSG00000224808 | 1.214547612 | 0           | 2.61385118  | 0.508191709 | 1           | SRGAP3-AS1  |
| ENSG00000249799 | 1.214547612 | 0           | 2.61385118  | 0.508191709 | 1           | SNRPCP13    |
| ENSG00000276620 | 1.214547612 | 0           | 2.61385118  | 0.508191709 | 1           | AL591516.1  |
| ENSG00000226010 | 1.214547612 | 0           | 2.61385118  | 0.508191709 | 1           | AL355852.1  |
| ENSG00000224908 | 1.214547612 | 0           | 2.61385118  | 0.508191709 | 1           | TIMM8BP2    |
| ENSG00000277602 | 2.76893489  | 1.110911105 | 1.328819683 | 0.508249814 | 0.62865215  | AC005363.2  |
| ENSG00000103313 | 9.171412155 | 5.972586096 | 0.607809477 | 0.508482846 | 0.628908072 | MEFV        |
| ENSG00000285804 | 26.4867683  | 35.51269441 | -0.41738609 | 0.508505133 | 0.628908072 | AC025774.1  |
| ENSG00000168234 | 315.8744667 | 260.4541887 | 0.278988535 | 0.508570391 | 0.628947885 | TTC39C      |

|                 |             |             |              |             |             |             |
|-----------------|-------------|-------------|--------------|-------------|-------------|-------------|
| ENSG00000233266 | 9.691094111 | 6.726958189 | 0.52019016   | 0.50858574  | 0.628947885 | HMGB1P31    |
| ENSG00000279739 | 0.61420451  | 2.069570178 | -1.764174736 | 0.508773794 | 0.629150497 | AC011369.2  |
| ENSG00000286215 | 9.686079516 | 6.592335107 | 0.563552157  | 0.508820783 | 0.629178658 | AL356534.1  |
| ENSG00000130477 | 38.20192754 | 56.00675896 | -0.552586839 | 0.508900707 | 0.629247538 | UNC13A      |
| ENSG00000233532 | 28.04283615 | 15.34872528 | 0.868435267  | 0.508985375 | 0.629322278 | LINC00460   |
| ENSG00000121089 | 10.92834994 | 7.368060566 | 0.559063021  | 0.509035161 | 0.629353885 | NACA3P      |
| ENSG00000267698 | 1.54052587  | 3.169868797 | -1.053871628 | 0.509094018 | 0.629396702 | AC002116.2  |
| ENSG00000201388 | 0.908699006 | 2.099095884 | -1.217245732 | 0.50922666  | 0.629530731 | SNORA68B    |
| ENSG00000226055 | 6.944867441 | 10.41751479 | -0.592840058 | 0.509282168 | 0.629569397 | PAICSP1     |
| ENSG00000236297 | 2.429095225 | 0.774441189 | 1.678703045  | 0.509377425 | 0.629657193 | AC048351.1  |
| ENSG00000287855 | 8.786227322 | 5.819049794 | 0.600008243  | 0.509412378 | 0.629670441 | AL023882.1  |
| ENSG00000284879 | 8.256373634 | 4.554602387 | 0.871365696  | 0.509451723 | 0.629675389 | AC133644.3  |
| ENSG00000228212 | 1.188078446 | 2.547679642 | -1.085843707 | 0.509489089 | 0.629675389 | OFD1P17     |
| ENSG00000241111 | 1.188078446 | 2.547679642 | -1.085843707 | 0.509489089 | 0.629675389 | AC092040.1  |
| ENSG00000137571 | 4.007373099 | 1.773238453 | 1.169092793  | 0.509542162 | 0.629711026 | SLCO5A1     |
| ENSG00000288107 | 4.866965991 | 2.893606169 | 0.752301434  | 0.509569061 | 0.629714315 | AL731769.2  |
| ENSG00000230337 | 12.1894251  | 8.031543789 | 0.591842378  | 0.509595161 | 0.629716617 | EXOSC10-AS1 |
| ENSG00000259315 | 5.686228309 | 3.12857473  | 0.851642733  | 0.509921811 | 0.630090296 | ACTG1P17    |
| ENSG00000138381 | 471.3264161 | 417.4821047 | 0.174506277  | 0.509970867 | 0.630120945 | ASNSD1      |
| ENSG00000267751 | 3.359177531 | 5.94306039  | -0.831946129 | 0.51032399  | 0.630527277 | AC009005.1  |
| ENSG00000259172 | 4.907296564 | 2.455634897 | 0.987718     | 0.51044376  | 0.630645267 | AC023024.1  |
| ENSG00000176383 | 15.32062314 | 10.2190884  | 0.589395157  | 0.510617117 | 0.630803975 | B3GNT4      |
| ENSG00000222287 | 0.907445357 | 2.089639274 | -1.212938603 | 0.510620777 | 0.630803975 | RNU6-1043P  |
| ENSG00000273749 | 2090.943912 | 1874.715316 | 0.15765203   | 0.510668908 | 0.630833439 | CYFIP1      |
| ENSG00000272744 | 6.393630453 | 9.274637831 | -0.540978809 | 0.510706075 | 0.630849357 | AC107214.2  |
| ENSG00000181852 | 1082.084906 | 980.2407433 | 0.142291591  | 0.510754024 | 0.630878591 | RNF41       |
| ENSG00000176022 | 862.2031658 | 948.5110698 | -0.137944772 | 0.510783861 | 0.630885453 | B3GALT6     |
| novel.305       | 0           | 1.029478846 | -2.62933627  | 0.510798691 | 1           | -           |
| ENSG00000251893 | 0           | 1.029478846 | -2.62933627  | 0.510798691 | 1           | RF00156     |
| ENSG00000229261 | 0           | 1.029478846 | -2.62933627  | 0.510798691 | 1           | AL596223.1  |
| ENSG00000237501 | 0           | 1.029478846 | -2.62933627  | 0.510798691 | 1           | AC108667.1  |
| ENSG00000179546 | 0           | 1.029478846 | -2.62933627  | 0.510798691 | 1           | HTR1D       |
| ENSG00000233487 | 0           | 1.029478846 | -2.62933627  | 0.510798691 | 1           | RPSAP69     |
| ENSG00000232493 | 0           | 1.029478846 | -2.62933627  | 0.510798691 | 1           | RPL12P11    |
| ENSG00000232363 | 0           | 1.029478846 | -2.62933627  | 0.510798691 | 1           | AL021391.1  |
| ENSG00000250064 | 0           | 1.029478846 | -2.62933627  | 0.510798691 | 1           | AC097480.1  |
| ENSG00000145808 | 0           | 1.029478846 | -2.62933627  | 0.510798691 | 1           | ADAMTS19    |
| ENSG00000273406 | 0           | 1.029478846 | -2.62933627  | 0.510798691 | 1           | AC245008.1  |
| ENSG00000206964 | 0           | 1.029478846 | -2.62933627  | 0.510798691 | 1           | RF00019     |
| ENSG00000251614 | 0           | 1.029478846 | -2.62933627  | 0.510798691 | 1           | HSPA8P19    |
| ENSG00000270499 | 0           | 1.029478846 | -2.62933627  | 0.510798691 | 1           | MKI67P1     |
| ENSG00000255091 | 0           | 1.029478846 | -2.62933627  | 0.510798691 | 1           | AC087442.1  |
| ENSG00000279527 | 0           | 1.029478846 | -2.62933627  | 0.510798691 | 1           | AC073592.7  |
| ENSG00000225750 | 0           | 1.029478846 | -2.62933627  | 0.510798691 | 1           | AL357500.1  |
| ENSG00000199672 | 0           | 1.029478846 | -2.62933627  | 0.510798691 | 1           | RNU4-21P    |
| ENSG00000231440 | 0           | 1.029478846 | -2.62933627  | 0.510798691 | 1           | AL358176.4  |
| ENSG00000272729 | 0           | 1.029478846 | -2.62933627  | 0.510798691 | 1           | AC009336.1  |
| ENSG00000168530 | 0           | 1.029478846 | -2.62933627  | 0.510798691 | 1           | MYL1        |
| ENSG00000285761 | 0           | 1.029478846 | -2.62933627  | 0.510798691 | 1           | AL645939.5  |
| ENSG00000137404 | 0           | 1.029478846 | -2.62933627  | 0.510798691 | 1           | NRM         |
| ENSG00000223829 | 0           | 1.029478846 | -2.62933627  | 0.510798691 | 1           | AC004870.2  |

|                 |             |             |              |             |             |            |
|-----------------|-------------|-------------|--------------|-------------|-------------|------------|
| ENSG00000282381 | 0           | 1.029478846 | -2.62933627  | 0.510798691 | 1           | AC104073.4 |
| ENSG00000238832 | 0           | 1.029478846 | -2.62933627  | 0.510798691 | 1           | RF01233    |
| ENSG00000223657 | 0           | 1.029478846 | -2.62933627  | 0.510798691 | 1           | KRT8P51    |
| ENSG00000223162 | 0           | 1.029478846 | -2.62933627  | 0.510798691 | 1           | RNA5SP280  |
| ENSG00000263979 | 0           | 1.029478846 | -2.62933627  | 0.510798691 | 1           | MIR4672    |
| ENSG00000201998 | 0           | 1.029478846 | -2.62933627  | 0.510798691 | 1           | SNORA23    |
| ENSG00000238444 | 0           | 1.029478846 | -2.62933627  | 0.510798691 | 1           | RNU6-893P  |
| ENSG00000259290 | 0           | 1.029478846 | -2.62933627  | 0.510798691 | 1           | AP001007.3 |
| ENSG00000205420 | 0           | 1.029478846 | -2.62933627  | 0.510798691 | 1           | KRT6A      |
| ENSG00000258993 | 0           | 1.029478846 | -2.62933627  | 0.510798691 | 1           | AL352979.3 |
| ENSG00000234537 | 6.393630453 | 9.836619698 | -0.628333075 | 0.511056599 | 0.631192313 | AL354751.1 |
| ENSG00000101638 | 6.876814053 | 4.116631115 | 0.758462117  | 0.511133836 | 0.631257698 | ST8SIA5    |
| ENSG00000021852 | 0.616711807 | 2.71054416  | -2.134459856 | 0.511204155 | 0.631312227 | C8B        |
| ENSG00000253092 | 3.594465451 | 1.518200796 | 1.264849158  | 0.511262888 | 0.631312227 | RF01241    |
| ENSG00000259202 | 1.200686205 | 2.598430319 | -1.098508007 | 0.511268153 | 0.631312227 | AC012568.1 |
| ENSG00000182831 | 1024.550608 | 1111.987533 | -0.118312077 | 0.511275185 | 0.631312227 | C16orf72   |
| ENSG00000259022 | 14.89163152 | 18.98609106 | -0.352751233 | 0.511324764 | 0.631343442 | DNAJC8P1   |
| ENSG00000258851 | 0.909952655 | 2.089639274 | -1.21045922  | 0.511513457 | 0.631546411 | AL139300.2 |
| ENSG00000214770 | 7.531349136 | 4.892356573 | 0.611269442  | 0.511544779 | 0.63155507  | AL161756.1 |
| ENSG00000241547 | 2.388764651 | 4.381125383 | -0.864443709 | 0.51159389  | 0.63158569  | ACTG1P20   |
| ENSG00000258405 | 44.86727335 | 36.87072762 | 0.282060312  | 0.511777658 | 0.63178254  | ZNF578     |
| ENSG00000188199 | 8.412325328 | 5.270120557 | 0.668754592  | 0.512076224 | 0.63212108  | NUTM2B     |
| ENSG00000258951 | 2.067800989 | 0.743759607 | 1.497223288  | 0.512261689 | 0.63231998  | KRT18P7    |
| ENSG00000239912 | 3.047060681 | 5.22754222  | -0.768734294 | 0.512386434 | 0.632409472 | RPL39P36   |
| ENSG00000272825 | 17.56479021 | 22.5112146  | -0.354161224 | 0.512404135 | 0.632409472 | AL844908.1 |
| ENSG00000129493 | 790.8897402 | 698.0353971 | 0.179699873  | 0.512422042 | 0.632409472 | HEATR5A    |
| ENSG00000276672 | 14.99715218 | 21.57647743 | -0.527993496 | 0.512431554 | 0.632409472 | AL161891.1 |
| ENSG00000279029 | 2.06654734  | 0.743759607 | 1.496474716  | 0.512475366 | 0.6324335   | AL353583.1 |
| ENSG00000233016 | 690.3150693 | 779.829763  | -0.176235783 | 0.512652998 | 0.632622663 | SNHG7      |
| ENSG00000230825 | 5.457208632 | 2.944356846 | 0.89873418   | 0.512691009 | 0.632639521 | AC005532.1 |
| ENSG00000254505 | 3.384393048 | 1.396630344 | 1.264348146  | 0.512815959 | 0.632739959 | CHMP4A     |
| ENSG00000244218 | 5.113608021 | 8.45646243  | -0.718798482 | 0.512821112 | 0.632739959 | RN7SL81P   |
| ENSG00000115073 | 1378.900797 | 1543.671304 | -0.162613033 | 0.512930864 | 0.632845322 | ACTR1B     |
| ENSG00000268949 | 2.361041837 | 0.713078025 | 1.726942377  | 0.513060887 | 0.632975683 | MRPS17P1   |
| ENSG00000119929 | 321.8395168 | 357.6971923 | -0.153076798 | 0.513105009 | 0.633000059 | CUTC       |
| ENSG00000204435 | 0.615458159 | 1.733100261 | -1.510602807 | 0.513294035 | 1           | CSNK2B     |
| ENSG00000257761 | 0.615458159 | 1.733100261 | -1.510602807 | 0.513294035 | 1           | AC078860.1 |
| ENSG00000232060 | 14.28752747 | 9.836619698 | 0.531120575  | 0.513318701 | 0.633211138 | SLC4A1APP1 |
| ENSG00000267013 | 0.925067711 | 2.751966622 | -1.584760247 | 0.513324853 | 0.633211138 | LINC01929  |
| ENSG00000273598 | 3.368024343 | 1.773238453 | 0.915309268  | 0.513373899 | 0.633241574 | AC211486.3 |
| ENSG00000286606 | 11.4669079  | 8.070397711 | 0.516486164  | 0.513493294 | 0.633358776 | AC097468.4 |
| ENSG00000279825 | 4.207416313 | 1.936102971 | 1.146693157  | 0.513573932 | 0.633428167 | AC003957.1 |
| ENSG00000111725 | 546.1942617 | 481.6979128 | 0.180666013  | 0.513659424 | 0.633503536 | PRKAB1     |
| ENSG00000020922 | 633.7861445 | 583.1769562 | 0.120040299  | 0.513715449 | 0.633542559 | MRE11      |
| ENSG00000114107 | 216.0310299 | 238.3117951 | -0.141215506 | 0.514065149 | 0.633943736 | CEP70      |
| ENSG00000198804 | 240832.9238 | 214311.3901 | 0.168323526  | 0.514216471 | 0.634076831 | MT-CO1     |
| ENSG00000138028 | 136.770982  | 115.0254025 | 0.248627438  | 0.514221887 | 0.634076831 | CGREF1     |
| ENSG00000248599 | 1.832513069 | 0.672939833 | 1.405207404  | 0.514250043 | 1           | AC018781.1 |
| ENSG00000287865 | 2.149715785 | 5.888713693 | -1.4542726   | 0.514263232 | 0.634080339 | AC099552.5 |
| ENSG00000226268 | 12.78858583 | 9.119945653 | 0.492627893  | 0.514273542 | 0.634080339 | AC135977.1 |
| ENSG00000164220 | 45.39390773 | 30.4426697  | 0.57476127   | 0.514303771 | 0.634087518 | F2RL2      |



|                 |             |             |              |             |             |            |
|-----------------|-------------|-------------|--------------|-------------|-------------|------------|
| ENSG00000260743 | 6.886914514 | 10.03846653 | -0.53978284  | 0.51440092  | 0.6341772   | AC007823.1 |
| ENSG00000205268 | 336.0638192 | 391.88578   | -0.221687339 | 0.514465651 | 0.634226907 | PDE7A      |
| ENSG00000229828 | 1.83125942  | 0.672939833 | 1.404395097  | 0.514491137 | 1           | PDE4DIPP1  |
| ENSG00000274292 | 3.636049674 | 5.82966228  | -0.675682818 | 0.514510898 | 0.634252593 | AC084018.2 |
| ENSG00000173163 | 382.2451502 | 423.0551883 | -0.1468212   | 0.514611068 | 0.634345978 | COMMD1     |
| ENSG00000286649 | 0.616711807 | 2.038888596 | -1.741025705 | 0.514773963 | 1           | AC006566.2 |
| ENSG00000157653 | 13.38258941 | 9.568657805 | 0.477444956  | 0.514884597 | 0.634653037 | C9orf43    |
| ENSG00000116194 | 42.3673327  | 62.07909542 | -0.55243682  | 0.514939124 | 0.634683112 | ANGPTL1    |
| ENSG00000256616 | 9.513759118 | 5.879257082 | 0.699087459  | 0.514957854 | 0.634683112 | AP002414.2 |
| ENSG00000224892 | 7.47214256  | 11.31108628 | -0.590536116 | 0.515056355 | 0.634774402 | RPS4XP16   |
| ENSG00000259585 | 0           | 1.00940975  | -2.603717986 | 0.515095988 | 1           | RBM17P4    |
| ENSG00000286947 | 0           | 1.00940975  | -2.603717986 | 0.515095988 | 1           | AC022467.2 |
| ENSG00000236636 | 0           | 1.00940975  | -2.603717986 | 0.515095988 | 1           | AL627308.2 |
| ENSG00000229886 | 0           | 1.00940975  | -2.603717986 | 0.515095988 | 1           | AC068533.2 |
| ENSG00000227379 | 0           | 1.00940975  | -2.603717986 | 0.515095988 | 1           | PPIAP2     |
| ENSG00000286352 | 0           | 1.00940975  | -2.603717986 | 0.515095988 | 1           | AC104451.2 |
| ENSG00000223529 | 0           | 1.00940975  | -2.603717986 | 0.515095988 | 1           | EEF1A1P8   |
| ENSG00000235725 | 0           | 1.00940975  | -2.603717986 | 0.515095988 | 1           | AC007389.3 |
| ENSG00000202071 | 0           | 1.00940975  | -2.603717986 | 0.515095988 | 1           | RF00019    |
| ENSG00000125492 | 0           | 1.00940975  | -2.603717986 | 0.515095988 | 1           | BARHL1     |
| ENSG00000286559 | 0           | 1.00940975  | -2.603717986 | 0.515095988 | 1           | AC099845.1 |
| ENSG00000266320 | 0           | 1.00940975  | -2.603717986 | 0.515095988 | 1           | MIR3909    |
| ENSG00000288077 | 0           | 1.00940975  | -2.603717986 | 0.515095988 | 1           | AC027129.1 |
| ENSG00000285637 | 0           | 1.00940975  | -2.603717986 | 0.515095988 | 1           | AL161449.2 |
| ENSG00000276430 | 0           | 1.00940975  | -2.603717986 | 0.515095988 | 1           | FAM25C     |
| ENSG00000269846 | 0           | 1.00940975  | -2.603717986 | 0.515095988 | 1           | AL136172.1 |
| ENSG00000100207 | 0           | 1.00940975  | -2.603717986 | 0.515095988 | 1           | TCF20      |
| ENSG00000242741 | 0           | 1.00940975  | -2.603717986 | 0.515095988 | 1           | LINC02005  |
| ENSG00000250509 | 0           | 1.00940975  | -2.603717986 | 0.515095988 | 1           | AC034213.1 |
| ENSG00000174572 | 0           | 1.00940975  | -2.603717986 | 0.515095988 | 1           | RPL10P2    |
| ENSG00000285911 | 0           | 1.00940975  | -2.603717986 | 0.515095988 | 1           | AL391834.3 |
| ENSG00000270926 | 0           | 1.00940975  | -2.603717986 | 0.515095988 | 1           | AC008013.3 |
| ENSG00000207449 | 0           | 1.00940975  | -2.603717986 | 0.515095988 | 1           | RNU6-19P   |
| novel.981       | 0           | 1.00940975  | -2.603717986 | 0.515095988 | 1           | -          |
| ENSG00000252098 | 0           | 1.00940975  | -2.603717986 | 0.515095988 | 1           | RF00019    |
| ENSG00000230728 | 0           | 1.00940975  | -2.603717986 | 0.515095988 | 1           | AL590093.1 |
| ENSG00000162624 | 0           | 1.00940975  | -2.603717986 | 0.515095988 | 1           | LHX8       |
| ENSG00000236136 | 0           | 1.00940975  | -2.603717986 | 0.515095988 | 1           | ADORA2BP1  |
| ENSG00000227764 | 0           | 1.00940975  | -2.603717986 | 0.515095988 | 1           | LINC01693  |
| ENSG00000263439 | 0           | 1.00940975  | -2.603717986 | 0.515095988 | 1           | MIR4753    |
| ENSG00000232192 | 0           | 1.00940975  | -2.603717986 | 0.515095988 | 1           | KIF26B-AS1 |
| ENSG00000231083 | 0           | 1.00940975  | -2.603717986 | 0.515095988 | 1           | AC011747.1 |
| ENSG00000248851 | 0           | 1.00940975  | -2.603717986 | 0.515095988 | 1           | AC006427.1 |
| ENSG00000204576 | 0           | 1.00940975  | -2.603717986 | 0.515095988 | 1           | PRR3       |
| ENSG00000220960 | 0           | 1.00940975  | -2.603717986 | 0.515095988 | 1           | AL079342.2 |
| ENSG00000253842 | 0           | 1.00940975  | -2.603717986 | 0.515095988 | 1           | AP003472.2 |
| ENSG00000255227 | 0           | 1.00940975  | -2.603717986 | 0.515095988 | 1           | AC090124.1 |
| ENSG00000254730 | 0           | 1.00940975  | -2.603717986 | 0.515095988 | 1           | AP002453.1 |
| ENSG00000256947 | 0           | 1.00940975  | -2.603717986 | 0.515095988 | 1           | AP002518.2 |
| ENSG00000251839 | 0           | 1.00940975  | -2.603717986 | 0.515095988 | 1           | RNU7-12P   |
| ENSG00000199201 | 0           | 1.00940975  | -2.603717986 | 0.515095988 | 1           | RF00019    |

|                 |             |             |              |             |             |              |
|-----------------|-------------|-------------|--------------|-------------|-------------|--------------|
| ENSG00000144785 | 0           | 1.00940975  | -2.603717986 | 0.515095988 | 1           | AC073896.1   |
| ENSG00000237176 | 0           | 1.00940975  | -2.603717986 | 0.515095988 | 1           | AC079905.1   |
| ENSG00000256125 | 0           | 1.00940975  | -2.603717986 | 0.515095988 | 1           | AC005868.1   |
| ENSG00000276569 | 0           | 1.00940975  | -2.603717986 | 0.515095988 | 1           | AL138709.1   |
| ENSG00000251792 | 0           | 1.00940975  | -2.603717986 | 0.515095988 | 1           | RF00019      |
| ENSG00000201263 | 0           | 1.00940975  | -2.603717986 | 0.515095988 | 1           | SNORD114-6   |
| ENSG00000202142 | 0           | 1.00940975  | -2.603717986 | 0.515095988 | 1           | SNORD114-18  |
| ENSG00000260658 | 0           | 1.00940975  | -2.603717986 | 0.515095988 | 1           | AC138305.1   |
| ENSG00000265043 | 0           | 1.00940975  | -2.603717986 | 0.515095988 | 1           | AC068418.2   |
| ENSG00000233993 | 0           | 1.00940975  | -2.603717986 | 0.515095988 | 1           | AL121900.1   |
| ENSG00000200985 | 0           | 1.00940975  | -2.603717986 | 0.515095988 | 1           | RNA5SP493    |
| ENSG00000143756 | 752.2090894 | 677.2508489 | 0.1517637    | 0.515110825 | 0.63481142  | FBXO28       |
| ENSG00000287078 | 2.124500267 | 3.627909165 | -0.768408209 | 0.515263094 | 0.634968954 | AL513218.2   |
| ENSG00000285413 | 1.188078446 | 0           | 2.58429195   | 0.51527135  | 1           | AP001056.2   |
| ENSG00000227681 | 1.188078446 | 0           | 2.58429195   | 0.51527135  | 1           | AL033504.1   |
| ENSG00000270115 | 1.188078446 | 0           | 2.58429195   | 0.51527135  | 1           | AL513327.3   |
| ENSG00000224655 | 1.188078446 | 0           | 2.58429195   | 0.51527135  | 1           | LINC01823    |
| ENSG00000181355 | 1.188078446 | 0           | 2.58429195   | 0.51527135  | 1           | OFCC1        |
| ENSG00000257376 | 1.188078446 | 0           | 2.58429195   | 0.51527135  | 1           | AC079601.2   |
| ENSG00000225446 | 1.188078446 | 0           | 2.58429195   | 0.51527135  | 1           | LINC01763    |
| ENSG00000159961 | 1.188078446 | 0           | 2.58429195   | 0.51527135  | 1           | OR3A3        |
| ENSG00000235830 | 1.188078446 | 0           | 2.58429195   | 0.51527135  | 1           | SRGAP3-AS4   |
| ENSG00000225299 | 1.188078446 | 0           | 2.58429195   | 0.51527135  | 1           | AL139240.1   |
| ENSG00000261703 | 1.188078446 | 0           | 2.58429195   | 0.51527135  | 1           | LINC02168    |
| ENSG00000287744 | 1.188078446 | 0           | 2.58429195   | 0.51527135  | 1           | AC005998.1   |
| ENSG00000286085 | 1.188078446 | 0           | 2.58429195   | 0.51527135  | 1           | AL109653.3   |
| ENSG00000270076 | 1.188078446 | 0           | 2.58429195   | 0.51527135  | 1           | AF131215.7   |
| ENSG00000250106 | 1.188078446 | 0           | 2.58429195   | 0.51527135  | 1           | ANKRD33B-AS1 |
| ENSG00000251374 | 1.188078446 | 0           | 2.58429195   | 0.51527135  | 1           | AC010598.1   |
| ENSG00000237470 | 1.188078446 | 0           | 2.58429195   | 0.51527135  | 1           | DCLRE1CP1    |
| ENSG00000277651 | 1.188078446 | 0           | 2.58429195   | 0.51527135  | 1           | AL391261.4   |
| ENSG00000256189 | 1.188078446 | 0           | 2.58429195   | 0.51527135  | 1           | AP003717.2   |
| novel.702       | 1.188078446 | 0           | 2.58429195   | 0.51527135  | 1           | -            |
| ENSG00000227578 | 1.188078446 | 0           | 2.58429195   | 0.51527135  | 1           | RPS3AP53     |
| ENSG00000223872 | 1.188078446 | 0           | 2.58429195   | 0.51527135  | 1           | AC006372.1   |
| ENSG00000213934 | 1.188078446 | 0           | 2.58429195   | 0.51527135  | 1           | HBG1         |
| ENSG00000256678 | 1.188078446 | 0           | 2.58429195   | 0.51527135  | 1           | AC025423.3   |
| ENSG00000260689 | 1.188078446 | 0           | 2.58429195   | 0.51527135  | 1           | HNRNPA3P11   |
| ENSG00000206177 | 1.188078446 | 0           | 2.58429195   | 0.51527135  | 1           | HBM          |
| ENSG00000252456 | 1.188078446 | 0           | 2.58429195   | 0.51527135  | 1           | RNA5SP434    |
| ENSG00000237911 | 1.188078446 | 0           | 2.58429195   | 0.51527135  | 1           | SRP68P3      |
| ENSG00000125900 | 1.188078446 | 0           | 2.58429195   | 0.51527135  | 1           | SIRPD        |
| ENSG00000267693 | 1.188078446 | 0           | 2.58429195   | 0.51527135  | 1           | AC011477.5   |
| ENSG00000240729 | 3.240764379 | 1.41669944  | 1.193431971  | 0.51529864  | 0.634982639 | AC146507.2   |
| ENSG00000268649 | 5.481170501 | 7.928758164 | -0.533504849 | 0.515363636 | 0.635032612 | AL132655.2   |
| ENSG00000126458 | 2636.111433 | 3128.463782 | -0.24693815  | 0.515434551 | 0.635068715 | RRAS         |
| ENSG00000222460 | 1.510295757 | 2.893606169 | -0.934137103 | 0.515457594 | 0.635068715 | RN7SKP271    |
| ENSG00000178460 | 29.63963438 | 22.7688208  | 0.373831796  | 0.515466266 | 0.635068715 | MCMDC2       |
| ENSG00000238286 | 2.431602522 | 4.188735158 | -0.796758727 | 0.515566386 | 0.635161945 | SLC35E1P1    |
| novel.227       | 1.186824798 | 0           | 2.582882969  | 0.515611533 | 1           | -            |
| ENSG00000268931 | 1.186824798 | 0           | 2.582882969  | 0.515611533 | 1           | AC136469.1   |

|                 |             |             |              |             |             |            |
|-----------------|-------------|-------------|--------------|-------------|-------------|------------|
| ENSG00000228264 | 1.186824798 | 0           | 2.582882969  | 0.515611533 | 1           | PSMD8P1    |
| ENSG00000254533 | 1.186824798 | 0           | 2.582882969  | 0.515611533 | 1           | AF186192.1 |
| ENSG00000266417 | 1.186824798 | 0           | 2.582882969  | 0.515611533 | 1           | MIR4424    |
| ENSG00000202079 | 1.186824798 | 0           | 2.582882969  | 0.515611533 | 1           | RF00019    |
| ENSG00000169618 | 1.186824798 | 0           | 2.582882969  | 0.515611533 | 1           | PROKR1     |
| ENSG00000271172 | 1.186824798 | 0           | 2.582882969  | 0.515611533 | 1           | AC104662.1 |
| ENSG00000272986 | 1.186824798 | 0           | 2.582882969  | 0.515611533 | 1           | AC009570.1 |
| ENSG00000250475 | 1.186824798 | 0           | 2.582882969  | 0.515611533 | 1           | AC017037.2 |
| ENSG00000253439 | 1.186824798 | 0           | 2.582882969  | 0.515611533 | 1           | CDC42P5    |
| novel.319       | 1.186824798 | 0           | 2.582882969  | 0.515611533 | 1           | -          |
| ENSG00000224232 | 1.186824798 | 0           | 2.582882969  | 0.515611533 | 1           | AC005104.2 |
| ENSG00000259241 | 1.186824798 | 0           | 2.582882969  | 0.515611533 | 1           | AC020892.1 |
| ENSG00000239508 | 1.186824798 | 0           | 2.582882969  | 0.515611533 | 1           | PLCH1-AS1  |
| ENSG00000200701 | 1.186824798 | 0           | 2.582882969  | 0.515611533 | 1           | RNU6-674P  |
| ENSG00000224918 | 1.186824798 | 0           | 2.582882969  | 0.515611533 | 1           | AC066595.1 |
| ENSG00000145194 | 1.186824798 | 0           | 2.582882969  | 0.515611533 | 1           | ECE2       |
| ENSG00000217733 | 1.186824798 | 0           | 2.582882969  | 0.515611533 | 1           | CCT7P1     |
| ENSG00000223280 | 1.186824798 | 0           | 2.582882969  | 0.515611533 | 1           | RNU6-57P   |
| ENSG00000269930 | 1.186824798 | 0           | 2.582882969  | 0.515611533 | 1           | AC091057.3 |
| ENSG00000156413 | 1.186824798 | 0           | 2.582882969  | 0.515611533 | 1           | FUT6       |
| ENSG00000272161 | 1.186824798 | 0           | 2.582882969  | 0.515611533 | 1           | AL589739.1 |
| ENSG00000221662 | 1.186824798 | 0           | 2.582882969  | 0.515611533 | 1           | MIR1290    |
| ENSG00000223589 | 1.186824798 | 0           | 2.582882969  | 0.515611533 | 1           | AL139158.1 |
| ENSG00000233020 | 1.186824798 | 0           | 2.582882969  | 0.515611533 | 1           | AL354872.1 |
| ENSG00000228414 | 1.186824798 | 0           | 2.582882969  | 0.515611533 | 1           | LINC01185  |
| ENSG00000234653 | 1.186824798 | 0           | 2.582882969  | 0.515611533 | 1           | AC079117.1 |
| ENSG00000201496 | 1.186824798 | 0           | 2.582882969  | 0.515611533 | 1           | RN7SKP275  |
| ENSG00000249071 | 1.186824798 | 0           | 2.582882969  | 0.515611533 | 1           | EGFLAM-AS3 |
| ENSG00000207168 | 1.186824798 | 0           | 2.582882969  | 0.515611533 | 1           | SNORA15    |
| ENSG00000254048 | 1.186824798 | 0           | 2.582882969  | 0.515611533 | 1           | AC105150.1 |
| ENSG00000250111 | 1.186824798 | 0           | 2.582882969  | 0.515611533 | 1           | AC107982.1 |
| ENSG00000236772 | 5.700089716 | 8.589929636 | -0.589366287 | 0.515720043 | 0.635321121 | AL034550.1 |
| ENSG00000227946 | 2.444210281 | 1.060160428 | 1.195089896  | 0.515919    | 0.635536084 | AC007383.2 |
| ENSG00000258035 | 2.722336072 | 1.10029862  | 1.316050779  | 0.515981568 | 0.63557357  | AC123567.2 |
| ENSG00000227973 | 6.928498736 | 4.147312696 | 0.759222965  | 0.515998357 | 0.63557357  | PIN4P1     |
| ENSG00000259659 | 6.311786929 | 9.701996617 | -0.61764332  | 0.516145658 | 0.63566938  | AC009996.1 |
| ENSG00000253978 | 3.29495636  | 1.161661783 | 1.528973109  | 0.516172724 | 0.63566938  | AC026689.1 |
| ENSG00000108556 | 15.62926378 | 10.58868004 | 0.555148949  | 0.516184851 | 0.63566938  | CHRNE      |
| ENSG00000271825 | 2.990361403 | 1.456837632 | 1.047614768  | 0.51618578  | 0.63566938  | AC019080.3 |
| ENSG00000136859 | 522.4542013 | 650.0162471 | -0.315066716 | 0.516198475 | 0.63566938  | ANGPTL2    |
| ENSG00000280832 | 106.8768986 | 123.0468477 | -0.20273976  | 0.516577242 | 0.63610566  | GSEC       |
| ENSG00000189298 | 105.4037854 | 92.36985141 | 0.190244451  | 0.516603503 | 0.636107848 | ZKSCAN3    |
| ENSG00000219200 | 55.68946189 | 44.31050705 | 0.332708142  | 0.516650494 | 0.636135561 | RNASEK     |
| ENSG00000235246 | 2.708474665 | 1.110911105 | 1.301020235  | 0.516760597 | 0.636240975 | AL020993.1 |
| ENSG00000237705 | 2.45681804  | 0.723690511 | 1.765224073  | 0.51697085  | 0.63646968  | AC008937.2 |
| ENSG00000272440 | 8.763519102 | 5.961973611 | 0.545118514  | 0.517072325 | 0.636564446 | AC080013.6 |
| ENSG00000104714 | 454.5481661 | 394.4936669 | 0.204967841  | 0.517212264 | 0.636706555 | ERICH1     |
| ENSG00000117472 | 4.233885479 | 6.806078698 | -0.68538671  | 0.517326443 | 0.636816939 | TSPAN1     |
| ENSG00000234776 | 3.998597558 | 1.742556871 | 1.185505514  | 0.51749978  | 0.636965094 | C11orf94   |
| ENSG00000135778 | 646.2320987 | 594.0110889 | 0.121588668  | 0.517513074 | 0.636965094 | NTPCR      |
| ENSG00000170264 | 119.6533474 | 100.8925573 | 0.24552421   | 0.517520349 | 0.636965094 | FAM161A    |

|                 |             |             |              |             |             |            |
|-----------------|-------------|-------------|--------------|-------------|-------------|------------|
| ENSG00000116127 | 417.9197862 | 363.1511324 | 0.202995551  | 0.517550948 | 0.636972581 | ALMS1      |
| ENSG00000106009 | 1118.046826 | 1218.871333 | -0.124517858 | 0.517618956 | 0.637026105 | BRAT1      |
| ENSG00000164609 | 1017.235129 | 923.9968543 | 0.138958398  | 0.517779384 | 0.637193358 | SLU7       |
| ENSG00000261592 | 2.729857965 | 1.110911105 | 1.310642526  | 0.517859543 | 0.637261819 | AC010531.3 |
| ENSG00000279057 | 2.373649595 | 4.737664395 | -0.987870203 | 0.517930057 | 0.637292895 | AC141586.4 |
| ENSG00000223705 | 430.1774351 | 485.6677673 | -0.175388331 | 0.517933855 | 0.637292895 | NSUN5P1    |
| ENSG00000228889 | 16.42456423 | 21.80057672 | -0.410694639 | 0.517977664 | 0.637316617 | UBAC2-AS1  |
| ENSG00000135973 | 2.699627853 | 1.110911105 | 1.296903928  | 0.518027677 | 0.63734797  | GPR45      |
| ENSG00000073921 | 4002.271144 | 4374.080922 | -0.128171699 | 0.51817971  | 0.637504832 | PICALM     |
| ENSG00000272716 | 8.146807295 | 11.10808357 | -0.446465516 | 0.518264833 | 0.637579366 | AL121658.1 |
| ENSG00000224063 | 11.65935795 | 7.621813954 | 0.618682407  | 0.518309126 | 0.637603665 | AC007319.1 |
| ENSG00000179902 | 1.17296339  | 0           | 2.567178914  | 0.518367224 | 1           | C1orf194   |
| ENSG00000229588 | 1.17296339  | 0           | 2.567178914  | 0.518367224 | 1           | AL596087.2 |
| ENSG00000188056 | 1.17296339  | 0           | 2.567178914  | 0.518367224 | 1           | TREML4     |
| ENSG00000105694 | 1.17296339  | 0           | 2.567178914  | 0.518367224 | 1           | ELOCP28    |
| ENSG00000254208 | 1.17296339  | 0           | 2.567178914  | 0.518367224 | 1           | AC011773.1 |
| ENSG00000249106 | 1.17296339  | 0           | 2.567178914  | 0.518367224 | 1           | AC097537.1 |
| ENSG00000270087 | 1.17296339  | 0           | 2.567178914  | 0.518367224 | 1           | AC010997.3 |
| ENSG00000268223 | 1.17296339  | 0           | 2.567178914  | 0.518367224 | 1           | ARL14EPL   |
| ENSG00000240518 | 1.17296339  | 0           | 2.567178914  | 0.518367224 | 1           | AC116353.1 |
| ENSG00000200106 | 1.17296339  | 0           | 2.567178914  | 0.518367224 | 1           | RNU6-984P  |
| ENSG00000259561 | 1.17296339  | 0           | 2.567178914  | 0.518367224 | 1           | AC079075.1 |
| ENSG00000236290 | 1.17296339  | 0           | 2.567178914  | 0.518367224 | 1           | EEF1GP7    |
| ENSG00000250062 | 1.17296339  | 0           | 2.567178914  | 0.518367224 | 1           | AC104827.1 |
| ENSG00000106038 | 1.17296339  | 0           | 2.567178914  | 0.518367224 | 1           | EVX1       |
| ENSG00000254743 | 1.17296339  | 0           | 2.567178914  | 0.518367224 | 1           | OR10V3P    |
| ENSG00000230735 | 1.17296339  | 0           | 2.567178914  | 0.518367224 | 1           | AC093423.2 |
| ENSG00000225703 | 1.17296339  | 0           | 2.567178914  | 0.518367224 | 1           | AC114737.1 |
| ENSG00000232373 | 1.17296339  | 0           | 2.567178914  | 0.518367224 | 1           | MTCYBP3    |
| ENSG00000224363 | 1.17296339  | 0           | 2.567178914  | 0.518367224 | 1           | FP700111.1 |
| ENSG00000184611 | 1.17296339  | 0           | 2.567178914  | 0.518367224 | 1           | KCNH7      |
| ENSG00000242034 | 1.17296339  | 0           | 2.567178914  | 0.518367224 | 1           | AC097493.1 |
| ENSG00000287813 | 1.17296339  | 0           | 2.567178914  | 0.518367224 | 1           | AC016705.3 |
| ENSG00000279757 | 1.17296339  | 0           | 2.567178914  | 0.518367224 | 1           | AC132068.1 |
| ENSG00000283125 | 1.17296339  | 0           | 2.567178914  | 0.518367224 | 1           | AC022726.2 |
| ENSG00000243064 | 1.17296339  | 0           | 2.567178914  | 0.518367224 | 1           | ABCC13     |
| ENSG00000287510 | 1.17296339  | 0           | 2.567178914  | 0.518367224 | 1           | AL137857.1 |
| ENSG00000286581 | 1.17296339  | 0           | 2.567178914  | 0.518367224 | 1           | AL450992.3 |
| ENSG00000135638 | 1.17296339  | 0           | 2.567178914  | 0.518367224 | 1           | EMX1       |
| ENSG00000243033 | 1.17296339  | 0           | 2.567178914  | 0.518367224 | 1           | GAPDHP47   |
| ENSG00000152670 | 1.17296339  | 0           | 2.567178914  | 0.518367224 | 1           | DDX4       |
| ENSG00000189316 | 1.17296339  | 0           | 2.567178914  | 0.518367224 | 1           | AC073349.1 |
| ENSG00000236838 | 1.17296339  | 0           | 2.567178914  | 0.518367224 | 1           | AC090617.2 |
| ENSG00000228067 | 1.17296339  | 0           | 2.567178914  | 0.518367224 | 1           | LINC01740  |
| ENSG00000224789 | 1.17296339  | 0           | 2.567178914  | 0.518367224 | 1           | AC012363.1 |
| ENSG00000266896 | 1.17296339  | 0           | 2.567178914  | 0.518367224 | 1           | AL354892.3 |
| ENSG00000231651 | 1.17296339  | 0           | 2.567178914  | 0.518367224 | 1           | DLG3-AS1   |
| ENSG00000252747 | 1.17296339  | 0           | 2.567178914  | 0.518367224 | 1           | RNA5SP364  |
| ENSG00000275302 | 1.17296339  | 0           | 2.567178914  | 0.518367224 | 1           | CCL4       |
| ENSG00000202357 | 1.17296339  | 0           | 2.567178914  | 0.518367224 | 1           | RF00019    |
| ENSG00000231253 | 1.17296339  | 0           | 2.567178914  | 0.518367224 | 1           | LINC01640  |

|                 |            |   |             |             |   |              |
|-----------------|------------|---|-------------|-------------|---|--------------|
| ENSG00000223525 | 1.17296339 | 0 | 2.567178914 | 0.518367224 | 1 | RABGAP1L-IT1 |
| ENSG00000264377 | 1.17296339 | 0 | 2.567178914 | 0.518367224 | 1 | MIR4671      |
| ENSG00000229118 | 1.17296339 | 0 | 2.567178914 | 0.518367224 | 1 | AC068491.2   |
| ENSG00000250983 | 1.17296339 | 0 | 2.567178914 | 0.518367224 | 1 | AC022296.2   |
| ENSG00000113525 | 1.17296339 | 0 | 2.567178914 | 0.518367224 | 1 | IL5          |
| ENSG00000253695 | 1.17296339 | 0 | 2.567178914 | 0.518367224 | 1 | AC011008.1   |
| ENSG00000231188 | 1.17296339 | 0 | 2.567178914 | 0.518367224 | 1 | AL139819.1   |
| ENSG00000257023 | 1.17296339 | 0 | 2.567178914 | 0.518367224 | 1 | AC087241.2   |
| ENSG00000283891 | 1.17296339 | 0 | 2.567178914 | 0.518367224 | 1 | MIR628       |
| ENSG00000237259 | 1.17296339 | 0 | 2.567178914 | 0.518367224 | 1 | AL049646.2   |
| ENSG00000287589 | 1.17296339 | 0 | 2.567178914 | 0.518367224 | 1 | AC093426.2   |
| ENSG00000230327 | 1.17296339 | 0 | 2.567178914 | 0.518367224 | 1 | MTCO1P42     |
| ENSG00000213355 | 1.17296339 | 0 | 2.567178914 | 0.518367224 | 1 | CNN2P8       |
| ENSG00000214070 | 1.17296339 | 0 | 2.567178914 | 0.518367224 | 1 | AC011999.1   |
| ENSG00000227055 | 1.17296339 | 0 | 2.567178914 | 0.518367224 | 1 | AC009961.2   |
| ENSG00000234308 | 1.17296339 | 0 | 2.567178914 | 0.518367224 | 1 | LINC01878    |
| ENSG00000271137 | 1.17296339 | 0 | 2.567178914 | 0.518367224 | 1 | AC006254.3   |
| ENSG00000243149 | 1.17296339 | 0 | 2.567178914 | 0.518367224 | 1 | LINC02040    |
| ENSG00000207310 | 1.17296339 | 0 | 2.567178914 | 0.518367224 | 1 | RNU6-1127P   |
| ENSG00000239835 | 1.17296339 | 0 | 2.567178914 | 0.518367224 | 1 | AC092910.1   |
| ENSG00000250547 | 1.17296339 | 0 | 2.567178914 | 0.518367224 | 1 | AC079238.1   |
| ENSG00000249297 | 1.17296339 | 0 | 2.567178914 | 0.518367224 | 1 | LINC02174    |
| ENSG00000248197 | 1.17296339 | 0 | 2.567178914 | 0.518367224 | 1 | LINC00290    |
| ENSG00000250692 | 1.17296339 | 0 | 2.567178914 | 0.518367224 | 1 | AC008667.2   |
| ENSG00000280336 | 1.17296339 | 0 | 2.567178914 | 0.518367224 | 1 | AC244517.12  |
| ENSG00000204538 | 1.17296339 | 0 | 2.567178914 | 0.518367224 | 1 | PSORS1C2     |
| ENSG00000228834 | 1.17296339 | 0 | 2.567178914 | 0.518367224 | 1 | AL445189.2   |
| ENSG00000227365 | 1.17296339 | 0 | 2.567178914 | 0.518367224 | 1 | AC008060.2   |
| ENSG00000200566 | 1.17296339 | 0 | 2.567178914 | 0.518367224 | 1 | RNU5F-7P     |
| ENSG00000214628 | 1.17296339 | 0 | 2.567178914 | 0.518367224 | 1 | NDUFB5P2     |
| ENSG00000253893 | 1.17296339 | 0 | 2.567178914 | 0.518367224 | 1 | FAM85B       |
| ENSG00000257962 | 1.17296339 | 0 | 2.567178914 | 0.518367224 | 1 | AC011773.2   |
| ENSG00000202172 | 1.17296339 | 0 | 2.567178914 | 0.518367224 | 1 | RNU6-1327P   |
| ENSG00000207277 | 1.17296339 | 0 | 2.567178914 | 0.518367224 | 1 | RNA5SP284    |
| ENSG00000279706 | 1.17296339 | 0 | 2.567178914 | 0.518367224 | 1 | AL353608.4   |
| ENSG00000277828 | 1.17296339 | 0 | 2.567178914 | 0.518367224 | 1 | AL137067.2   |
| ENSG00000254864 | 1.17296339 | 0 | 2.567178914 | 0.518367224 | 1 | AC107884.2   |
| ENSG00000233499 | 1.17296339 | 0 | 2.567178914 | 0.518367224 | 1 | OR5B1P       |
| ENSG00000199875 | 1.17296339 | 0 | 2.567178914 | 0.518367224 | 1 | RF00019      |
| ENSG00000254638 | 1.17296339 | 0 | 2.567178914 | 0.518367224 | 1 | AP002884.2   |
| ENSG00000236027 | 1.17296339 | 0 | 2.567178914 | 0.518367224 | 1 | PATE3        |
| ENSG00000228882 | 1.17296339 | 0 | 2.567178914 | 0.518367224 | 1 | CICP9        |
| ENSG00000224265 | 1.17296339 | 0 | 2.567178914 | 0.518367224 | 1 | LINC02633    |
| ENSG00000237389 | 1.17296339 | 0 | 2.567178914 | 0.518367224 | 1 | AL645634.2   |
| ENSG00000279814 | 1.17296339 | 0 | 2.567178914 | 0.518367224 | 1 | AC010997.6   |
| ENSG00000286683 | 1.17296339 | 0 | 2.567178914 | 0.518367224 | 1 | AL512424.1   |
| ENSG00000266072 | 1.17296339 | 0 | 2.567178914 | 0.518367224 | 1 | MIR5693      |
| ENSG00000270725 | 1.17296339 | 0 | 2.567178914 | 0.518367224 | 1 | AL356580.1   |
| ENSG00000173431 | 1.17296339 | 0 | 2.567178914 | 0.518367224 | 1 | RNASE8       |
| ENSG00000258808 | 1.17296339 | 0 | 2.567178914 | 0.518367224 | 1 | LINC02310    |
| ENSG00000259309 | 1.17296339 | 0 | 2.567178914 | 0.518367224 | 1 | AC021818.1   |

|                 |             |             |              |             |             |            |
|-----------------|-------------|-------------|--------------|-------------|-------------|------------|
| ENSG00000283365 | 1.17296339  | 0           | 2.567178914  | 0.518367224 | 1           | AC007603.3 |
| ENSG00000265408 | 1.17296339  | 0           | 2.567178914  | 0.518367224 | 1           | AC009084.1 |
| ENSG00000094796 | 1.17296339  | 0           | 2.567178914  | 0.518367224 | 1           | KRT31      |
| ENSG00000201239 | 1.17296339  | 0           | 2.567178914  | 0.518367224 | 1           | RF00019    |
| ENSG00000229643 | 1.17296339  | 0           | 2.567178914  | 0.518367224 | 1           | LINC00280  |
| ENSG00000270226 | 1.17296339  | 0           | 2.567178914  | 0.518367224 | 1           | AC006548.2 |
| ENSG00000271093 | 1.17296339  | 0           | 2.567178914  | 0.518367224 | 1           | IGLCOR22-2 |
| ENSG00000233388 | 1.17296339  | 0           | 2.567178914  | 0.518367224 | 1           | AL022334.1 |
| ENSG00000232110 | 3.842361131 | 1.823989131 | 1.085518433  | 0.518385148 | 0.637666991 | AL353751.1 |
| ENSG00000165813 | 352.621742  | 316.8637423 | 0.154843173  | 0.518483978 | 0.637755639 | CCDC186    |
| ENSG00000125534 | 3917.918608 | 3254.687927 | 0.267525691  | 0.518506307 | 0.637755639 | PPDPF      |
| ENSG00000226179 | 10.83257374 | 7.847325905 | 0.464179329  | 0.518566397 | 0.637799354 | LINC00685  |
| ENSG00000144868 | 6.925920168 | 14.39263475 | -1.057444812 | 0.51867033  | 0.637896987 | TMEM108    |
| ENSG00000241990 | 74.85161979 | 63.65698993 | 0.231981063  | 0.518695635 | 0.637897912 | PRR34-AS1  |
| ENSG00000248483 | 3.910414519 | 2.180528143 | 0.850815575  | 0.518759939 | 0.637946797 | POU5F2     |
| ENSG00000185100 | 102.5970269 | 144.1305279 | -0.489283121 | 0.51878879  | 0.637952081 | ADSSL1     |
| ENSG00000184374 | 8.402224867 | 5.492036488 | 0.623360823  | 0.518956988 | 0.63812871  | COLEC10    |
| ENSG00000104731 | 583.8098939 | 514.6787584 | 0.181367893  | 0.519035122 | 0.638194581 | KLHDC4     |
| ENSG00000208036 | 1.509042109 | 2.802717299 | -0.90186863  | 0.519160059 | 0.638290495 | MIR106B    |
| ENSG00000213928 | 7.29097535  | 4.688069593 | 0.638447103  | 0.519162263 | 0.638290495 | IRF9       |
| ENSG00000277938 | 12.11008887 | 8.856735655 | 0.445192176  | 0.51922716  | 0.638340077 | AL035252.3 |
| ENSG00000279289 | 16.77930549 | 11.66646942 | 0.529987918  | 0.519309815 | 0.638411484 | AL136164.3 |
| novel.509       | 1.218308559 | 2.547679642 | -1.062501831 | 0.519364478 | 0.638418617 | -          |
| ENSG00000100211 | 336.1335698 | 381.0514033 | -0.18119435  | 0.519364762 | 0.638418617 | CBY1       |
| ENSG00000256294 | 132.7855335 | 115.5718916 | 0.199799866  | 0.519575003 | 0.638640043 | ZNF225     |
| ENSG00000244556 | 2.697120555 | 1.41669944  | 0.924279375  | 0.519594058 | 0.638640043 | ODCP       |
| ENSG00000174586 | 31.63429611 | 23.55845079 | 0.427770769  | 0.519667344 | 0.638699904 | ZNF497     |
| ENSG00000241945 | 49.74488179 | 34.54958741 | 0.527074887  | 0.519992887 | 0.639069782 | PWP2       |
| ENSG00000145002 | 5.500046503 | 3.199394504 | 0.774780273  | 0.520252612 | 0.639358739 | FAM86B2    |
| ENSG00000286954 | 1.850135422 | 0.387220594 | 2.257992534  | 0.520275489 | 1           | AL033539.2 |
| ENSG00000033170 | 847.2197298 | 1054.994593 | -0.316322666 | 0.520383126 | 0.639488884 | FUT8       |
| ENSG00000277491 | 1.539272221 | 3.465044647 | -1.183176297 | 0.520618168 | 0.639722685 | AC087392.5 |
| ENSG00000235374 | 71.17441317 | 59.25232782 | 0.261927379  | 0.520645604 | 0.639722685 | SSR4P1     |
| ENSG00000101282 | 14.95932891 | 8.599257852 | 0.805944942  | 0.520647249 | 0.639722685 | RSPO4      |
| ENSG00000171823 | 260.6149769 | 226.4597423 | 0.202529417  | 0.520758963 | 0.639806784 | FBXL14     |
| ENSG00000259649 | 2.158491326 | 4.677457107 | -1.120135399 | 0.520764946 | 0.639806784 | AC027808.2 |
| ENSG00000271754 | 1.49643435  | 3.424906455 | -1.199947972 | 0.520910343 | 0.639955155 | AL355802.2 |
| ENSG00000267383 | 13.53220159 | 10.00778495 | 0.435539984  | 0.521074784 | 0.640126907 | AC011447.3 |
| ENSG00000042445 | 1027.991427 | 907.0847938 | 0.180363342  | 0.52121544  | 0.64024773  | RETSAT     |
| ENSG00000242802 | 812.8786586 | 895.2101037 | -0.138973525 | 0.521246653 | 0.64024773  | AP5Z1      |
| ENSG00000156735 | 488.3258792 | 425.1000187 | 0.199768243  | 0.521247065 | 0.64024773  | BAG4       |
| ENSG00000164985 | 1506.788393 | 1667.300227 | -0.146120471 | 0.521372656 | 0.640371719 | PSIP1      |
| ENSG00000091136 | 16009.23537 | 14869.55569 | 0.106531721  | 0.521408722 | 0.640379552 | LAMB1      |
| novel.330       | 32.74206942 | 25.82644736 | 0.337864284  | 0.52142833  | 0.640379552 | -          |
| ENSG00000255363 | 1.817398012 | 0.713078025 | 1.34457675   | 0.521458931 | 1           | AP001189.5 |
| ENSG00000184517 | 53.96568879 | 44.34602174 | 0.285956462  | 0.521657427 | 0.64063063  | ZFP1       |
| ENSG00000279968 | 11.89618425 | 8.234546499 | 0.528119188  | 0.52180296  | 0.640779066 | GVQW2      |
| ENSG00000269855 | 1.850135422 | 0.356539013 | 2.258005167  | 0.521839774 | 1           | RNF225     |
| ENSG00000050748 | 799.9728549 | 723.7129191 | 0.144491026  | 0.521840215 | 0.640794528 | MAPK9      |
| ENSG00000117114 | 443.5523716 | 532.8598079 | -0.265062193 | 0.521887753 | 0.640805534 | ADGRL2     |
| ENSG00000116679 | 3368.819365 | 2803.912153 | 0.264906247  | 0.521898507 | 0.640805534 | IVNS1ABP   |

|                 |             |             |              |             |             |            |
|-----------------|-------------|-------------|--------------|-------------|-------------|------------|
| ENSG00000170633 | 535.1718447 | 598.6336986 | -0.162047843 | 0.522284408 | 0.641249053 | RNF34      |
| ENSG00000155592 | 169.2377607 | 150.441219  | 0.170232022  | 0.522368451 | 0.641321932 | ZKSCAN2    |
| ENSG00000261546 | 1.525410814 | 3.12857473  | -1.048620856 | 0.522467597 | 0.641413345 | AC135782.3 |
| ENSG00000248334 | 4.600194309 | 8.247599129 | -0.851579376 | 0.522544186 | 0.641477706 | WHAMMP2    |
| ENSG00000248278 | 20.88503336 | 15.06429031 | 0.465042779  | 0.522775855 | 0.641731136 | SUMO2P17   |
| ENSG00000285803 | 11.92236869 | 7.827256809 | 0.607341268  | 0.522890577 | 0.641841637 | AL442003.1 |
| ENSG00000250565 | 66.51522575 | 77.62799808 | -0.225337718 | 0.523025712 | 0.641977183 | ATP6V1E2   |
| ENSG00000261821 | 4.924918918 | 8.265228081 | -0.750879437 | 0.523094144 | 0.642030846 | AC090826.1 |
| ENSG00000223703 | 1.84261353  | 0.356539013 | 2.252482381  | 0.523103433 | 1           | AC027612.1 |
| ENSG00000261770 | 6.963743444 | 9.712609103 | -0.478928993 | 0.523282539 | 0.64218829  | AC006504.1 |
| ENSG00000199325 | 3.337794231 | 1.753169357 | 0.915928798  | 0.523287886 | 0.64218829  | RNU4-39P   |
| ENSG00000129084 | 410.9199557 | 465.2211614 | -0.179625479 | 0.523296574 | 0.64218829  | PSMA1      |
| ENSG00000100413 | 720.7701497 | 813.4645408 | -0.174651539 | 0.523409755 | 0.642296847 | POLR3H     |
| ENSG00000138002 | 483.6684032 | 546.0078419 | -0.174735273 | 0.523533007 | 0.642417752 | IFT172     |
| ENSG00000085552 | 3.561728042 | 1.722487775 | 1.034240988  | 0.523597332 | 0.64246634  | IGSF9      |
| ENSG00000258558 | 4.18854031  | 1.548882377 | 1.455491771  | 0.523697862 | 0.642559347 | AL121852.1 |
| ENSG00000175782 | 409.9924676 | 364.4827696 | 0.16997984   | 0.523777968 | 0.642622964 | SLC35E3    |
| ENSG00000274051 | 6.413831376 | 3.812127049 | 0.734634815  | 0.52379918  | 0.642622964 | RF02271    |
| ENSG00000267309 | 20.04807742 | 15.65207347 | 0.361880366  | 0.523988866 | 0.642825325 | AC092295.2 |
| novel.916       | 62.58683252 | 97.67267448 | -0.64231567  | 0.524033676 | 0.642826801 | -          |
| ENSG00000146463 | 1101.244272 | 1187.899404 | -0.109221461 | 0.524039554 | 0.642826801 | ZMYM4      |
| ENSG00000080845 | 1562.032794 | 1700.944193 | -0.122727592 | 0.524102167 | 0.642873254 | DLGAP4     |
| ENSG00000279072 | 1.84261353  | 0.336469917 | 2.252488792  | 0.524141395 | 1           | AC118758.3 |
| ENSG00000277233 | 1.84261353  | 0.336469917 | 2.252488792  | 0.524141395 | 1           | RF00017    |
| ENSG00000229023 | 1.186824798 | 2.527610546 | -1.078571556 | 0.524166049 | 0.64292126  | AC067945.1 |
| ENSG00000264968 | 3.958266985 | 2.171071533 | 0.869439148  | 0.524235197 | 0.642974139 | AC090844.2 |
| ENSG00000210184 | 24.57108679 | 31.79774918 | -0.370615788 | 0.52427499  | 0.642974139 | MT-TS2     |
| ENSG00000206190 | 87.55538408 | 52.44321386 | 0.737873354  | 0.524331486 | 0.642974139 | ATP10A     |
| ENSG00000171953 | 218.8707389 | 244.6250894 | -0.159891207 | 0.524340356 | 0.642974139 | ATPAF2     |
| ENSG00000199933 | 3.254625787 | 1.4981317   | 1.141689567  | 0.524351687 | 0.642974139 | RNY1P16    |
| ENSG00000213221 | 10.93837913 | 7.785962742 | 0.482863926  | 0.524357648 | 0.642974139 | DNLZ       |
| ENSG00000267390 | 43.24400631 | 35.39253662 | 0.28965563   | 0.524531172 | 0.643156561 | AC036176.1 |
| ENSG00000234945 | 2.40137241  | 4.340987191 | -0.848458315 | 0.524633886 | 0.643252147 | GTF3C2-AS1 |
| ENSG00000272384 | 2.744973021 | 1.110911105 | 1.317153269  | 0.524820571 | 0.643450675 | AC016405.3 |
| ENSG00000089199 | 46.74179756 | 29.95510362 | 0.639156892  | 0.524942763 | 0.643570118 | CHGB       |
| ENSG00000089916 | 812.3274936 | 915.3245802 | -0.171926535 | 0.524984116 | 0.643590445 | GPATCH2L   |
| ENSG00000137947 | 395.3827503 | 438.9614003 | -0.151266487 | 0.525135085 | 0.643745147 | GTF2B      |
| ENSG00000244060 | 2.108131562 | 0.672939833 | 1.620029674  | 0.525238407 | 0.643841428 | RPS2P41    |
| ENSG00000177873 | 116.4581417 | 101.8216907 | 0.192080858  | 0.525625508 | 0.644261198 | ZNF619     |
| ENSG00000259536 | 2.723589721 | 1.161661783 | 1.262206512  | 0.525650712 | 0.644261198 | AC091045.1 |
| ENSG00000082293 | 4.733437783 | 9.507037853 | -0.997165438 | 0.525655243 | 0.644261198 | COL19A1    |
| ENSG00000234705 | 6.948628387 | 9.609951872 | -0.470444419 | 0.525704989 | 0.644291774 | HMGA1P4    |
| ENSG00000227413 | 0.879722543 | 2.160459047 | -1.280601687 | 0.525854497 | 0.644444608 | AL022238.1 |
| ENSG00000005471 | 134.2803585 | 94.98368047 | 0.501088529  | 0.525925427 | 0.644501134 | ABCB4      |
| ENSG00000180098 | 374.6179261 | 420.0015773 | -0.164553721 | 0.525979229 | 0.644536664 | TRNAU1AP   |
| ENSG00000180008 | 624.8419286 | 572.8492556 | 0.125492376  | 0.526138033 | 0.644700855 | SOCS4      |
| ENSG00000265205 | 6.818861126 | 11.05617702 | -0.693901774 | 0.526221599 | 0.644772843 | AC010761.4 |
| ENSG00000254535 | 32.71456006 | 19.22362816 | 0.763170914  | 0.526277605 | 0.644784131 | PABPC4L    |
| ENSG00000080644 | 3.391914941 | 1.10029862  | 1.62828647   | 0.526280446 | 0.644784131 | CHRNA3     |
| ENSG00000267632 | 12.35422361 | 8.765846785 | 0.487199131  | 0.526370276 | 0.644863778 | AC067852.3 |
| ENSG00000264513 | 1.200686205 | 2.466247382 | -1.040771406 | 0.526408728 | 0.644880477 | AC006270.1 |

|                 |             |             |              |             |             |             |
|-----------------|-------------|-------------|--------------|-------------|-------------|-------------|
| ENSG00000197647 | 58.81753973 | 48.25036911 | 0.283046718  | 0.526462722 | 0.644916214 | ZNF433      |
| ENSG00000246363 | 1.17296339  | 3.331577441 | -1.493972235 | 0.526567627 | 0.64501431  | LINC02458   |
| ENSG00000253317 | 1.230916317 | 3.067083173 | -1.310762615 | 0.526701797 | 0.645143147 | AC078906.1  |
| ENSG00000187860 | 57.43296555 | 49.51708108 | 0.214287713  | 0.526722468 | 0.645143147 | CCDC157     |
| ENSG00000138439 | 140.7635244 | 112.649098  | 0.322737111  | 0.526753418 | 0.645150642 | FAM117B     |
| ENSG00000288065 | 23.55944569 | 29.17565375 | -0.306585067 | 0.526833727 | 0.645218585 | AC007881.4  |
| ENSG00000182247 | 505.3278356 | 443.6392301 | 0.188324849  | 0.526868126 | 0.645230299 | UBE2E2      |
| ENSG00000269949 | 3.972128392 | 6.04340587  | -0.613534376 | 0.527002    | 0.645356113 | AC069307.1  |
| ENSG00000252620 | 2.3900183   | 1.130980201 | 1.110375416  | 0.52702054  | 0.645356113 | RNU6ATAC24P |
| ENSG00000279069 | 16.81100271 | 23.59516854 | -0.493608234 | 0.527135216 | 0.645459147 | AC015813.5  |
| ENSG00000179934 | 2.128261214 | 0.672939833 | 1.632951125  | 0.527154368 | 0.645459147 | CCR8        |
| ENSG00000146477 | 78.1817058  | 120.5307956 | -0.625279132 | 0.527265082 | 0.645564283 | SLC22A3     |
| ENSG00000205583 | 83.82277527 | 70.17028574 | 0.256477999  | 0.527424415 | 0.645728935 | STAG3L1     |
| ENSG00000196792 | 564.0850302 | 516.5447523 | 0.127347956  | 0.527636865 | 0.645944719 | STRN3       |
| ENSG00000215126 | 108.6200463 | 92.91754356 | 0.224267132  | 0.52765039  | 0.645944719 | CBWD6       |
| ENSG00000069509 | 220.7687981 | 243.6361339 | -0.142227982 | 0.52767527  | 0.645944742 | FUNDC1      |
| ENSG00000169359 | 513.2007492 | 561.0378549 | -0.128138231 | 0.527720625 | 0.645969827 | SLC33A1     |
| ENSG00000116032 | 49.45966103 | 36.54816224 | 0.440064703  | 0.527783579 | 0.64601645  | GRIN3B      |
| ENSG00000257524 | 15.91344435 | 20.75932951 | -0.381752946 | 0.52782213  | 0.646033202 | AL157935.2  |
| novel.553       | 116.6779863 | 90.32797473 | 0.366974579  | 0.52784991  | 0.646036768 | -           |
| ENSG00000276571 | 9.918860139 | 6.908735928 | 0.529133002  | 0.52796313  | 0.646144899 | AC002550.2  |
| ENSG00000287630 | 2.12199297  | 0.672939833 | 1.629139777  | 0.528175019 | 0.646373771 | AC011370.1  |
| ENSG00000269243 | 3.619680969 | 5.73646166  | -0.663440853 | 0.528244123 | 0.646427892 | AC008894.2  |
| ENSG00000099942 | 1496.38776  | 1649.666189 | -0.14049323  | 0.528347391 | 0.646523812 | CRKL        |
| ENSG00000134825 | 1420.408451 | 1280.560032 | 0.149752965  | 0.528414526 | 0.646566492 | TMEM258     |
| ENSG00000270276 | 1.830005771 | 0.672939833 | 1.40586771   | 0.528428213 | 1           | HIST2H4B    |
| ENSG00000136935 | 609.6026226 | 549.018361  | 0.150967122  | 0.528432042 | 0.646566492 | GOLGA1      |
| ENSG00000269652 | 10.71039964 | 16.59181932 | -0.62779604  | 0.52848595  | 0.646602    | AC011510.1  |
| ENSG00000250644 | 8.340510993 | 5.411760104 | 0.629956217  | 0.528598466 | 0.646709208 | AC068580.4  |
| ENSG00000108819 | 1786.75947  | 2005.029737 | -0.166199384 | 0.528664045 | 0.646758985 | PPP1R9B     |
| ENSG00000197557 | 123.9809996 | 142.9623289 | -0.2062359   | 0.528707869 | 0.646772948 | TTC30A      |
| novel.118       | 8.20726752  | 11.2308099  | -0.450401581 | 0.528753707 | 0.646772948 | -           |
| ENSG00000267491 | 1.801029308 | 3.606684194 | -0.997717547 | 0.52876062  | 0.646772948 | AC100788.1  |
| ENSG00000268350 | 30.97510244 | 37.53408245 | -0.276250656 | 0.528775035 | 0.646772948 | FAM156A     |
| ENSG00000108443 | 678.91737   | 613.2350551 | 0.146781624  | 0.528835437 | 0.646813579 | RPS6KB1     |
| ENSG00000200879 | 8.479053796 | 5.188688298 | 0.696695883  | 0.528858045 | 0.646813579 | SNORD14E    |
| ENSG00000228302 | 17.4148933  | 13.2992242  | 0.391933277  | 0.528929155 | 0.646870099 | AL512770.1  |
| ENSG00000279254 | 8.44255544  | 5.889869568 | 0.532957126  | 0.528980473 | 0.646878603 | AC020604.1  |
| ENSG00000225951 | 0.923814062 | 2.852312101 | -1.632214249 | 0.528985905 | 0.646878603 | ODF2-AS1    |
| ENSG00000166398 | 234.0627775 | 210.8080068 | 0.150918776  | 0.529134631 | 0.647030021 | KIAA0355    |
| ENSG00000206785 | 2.124500267 | 1.080229524 | 0.977117463  | 0.529454366 | 0.647390526 | SNORA15B-2  |
| ENSG00000100867 | 1.845120827 | 4.097846288 | -1.163530218 | 0.529833287 | 0.647823363 | DHRS2       |
| ENSG00000214530 | 292.9005178 | 378.8659224 | -0.370744438 | 0.529983429 | 0.647976445 | STARD10     |
| ENSG00000197885 | 139.8496683 | 164.9587163 | -0.23846803  | 0.530100597 | 0.648089201 | NKIRAS1     |
| ENSG00000041802 | 645.3348406 | 745.9896572 | -0.209352856 | 0.530373149 | 0.648373585 | LSG1        |
| ENSG00000131437 | 327.9612898 | 358.5018827 | -0.128610423 | 0.530383119 | 0.648373585 | KIF3A       |
| ENSG00000142784 | 1099.11249  | 990.1155968 | 0.150931746  | 0.530450869 | 0.648377879 | WDTC1       |
| ENSG00000279632 | 1.17296339  | 2.813329785 | -1.254684503 | 0.530461499 | 0.648377879 | AP003108.4  |
| ENSG00000280379 | 1.17296339  | 2.813329785 | -1.254684503 | 0.530461499 | 0.648377879 | AP003072.5  |
| ENSG00000229348 | 2.450478525 | 1.110911105 | 1.155032036  | 0.530504601 | 0.648400059 | HYI-AS1     |
| ENSG00000223537 | 2.403879708 | 1.00940975  | 1.221473001  | 0.530618426 | 0.648454976 | AL109947.1  |



|                 |             |             |              |             |             |            |
|-----------------|-------------|-------------|--------------|-------------|-------------|------------|
| ENSG00000254224 | 2.403879708 | 1.00940975  | 1.221473001  | 0.530618426 | 0.648454976 | AP003465.1 |
| ENSG00000162437 | 222.9491872 | 182.5675226 | 0.288265939  | 0.530624409 | 0.648454976 | RAVER2     |
| ENSG00000185019 | 209.1862412 | 235.8936486 | -0.172567211 | 0.530750853 | 0.64857899  | UBOX5      |
| ENSG00000287310 | 3.281094953 | 1.447381022 | 1.18683775   | 0.53085112  | 0.648671007 | AL133445.3 |
| ENSG00000135679 | 1954.072976 | 1703.006458 | 0.198205747  | 0.530909527 | 0.648703642 | MDM2       |
| ENSG00000272442 | 6.333170229 | 4.085949533 | 0.649116458  | 0.530927765 | 0.648703642 | AL353588.1 |
| ENSG00000144451 | 343.59017   | 306.7927619 | 0.163443931  | 0.531017604 | 0.648769507 | SPAG16     |
| ENSG00000131849 | 88.77466155 | 106.2927246 | -0.262183484 | 0.531033616 | 0.648769507 | ZNF132     |
| ENSG00000008517 | 774.2776189 | 521.09933   | 0.571456892  | 0.531064482 | 0.648769507 | IL32       |
| ENSG00000256167 | 3.007983756 | 1.069617038 | 1.489450703  | 0.531091199 | 0.648769507 | ATF4P4     |
| ENSG00000232063 | 41.90087381 | 33.08123821 | 0.336078463  | 0.531106525 | 0.648769507 | AL691447.2 |
| ENSG00000259120 | 2.406387005 | 4.290236513 | -0.832849182 | 0.531215537 | 0.648872161 | SMIM6      |
| ENSG00000124251 | 12.56053506 | 8.508497377 | 0.560193363  | 0.531266447 | 0.648903838 | TP53TG5    |
| ENSG00000279347 | 5.936631286 | 3.52640781  | 0.748955473  | 0.531399399 | 0.649035717 | AC021945.1 |
| ENSG00000116199 | 1590.095461 | 1746.431494 | -0.135416508 | 0.53146805  | 0.649084127 | FAM20B     |
| ENSG00000273783 | 13.00116553 | 9.448243229 | 0.450314741  | 0.531489    | 0.649084127 | AL136040.1 |
| novel.403       | 3.386900346 | 1.456837632 | 1.219344718  | 0.531636015 | 0.649233151 | -          |
| ENSG00000238109 | 2.11063886  | 3.557089392 | -0.754556932 | 0.531680575 | 0.649257052 | AC004893.1 |
| ENSG00000029364 | 993.465994  | 1098.904865 | -0.145608281 | 0.531808667 | 0.64936072  | SLC39A9    |
| ENSG00000116906 | 1061.232725 | 1156.716443 | -0.124040379 | 0.531815458 | 0.64936072  | GNPAT      |
| ENSG00000275322 | 15.09919663 | 11.55551145 | 0.389386845  | 0.531901413 | 0.64938012  | AC103746.1 |
| ENSG00000231351 | 36.47013435 | 44.799229   | -0.294308676 | 0.531933124 | 0.64938012  | AC111200.2 |
| ENSG00000260810 | 1.218308559 | 3.067083173 | -1.322807193 | 0.531948641 | 0.64938012  | AL135818.2 |
| ENSG00000072201 | 54.77123189 | 44.48308496 | 0.299313304  | 0.531962808 | 0.64938012  | LNX1       |
| ENSG00000101849 | 643.7519313 | 708.7924386 | -0.138541361 | 0.531972598 | 0.64938012  | TBL1X      |
| ENSG00000213090 | 4.191047608 | 2.51699806  | 0.740366388  | 0.531981313 | 0.64938012  | AC007256.1 |
| ENSG00000259335 | 1.818651661 | 0.713078025 | 1.345589162  | 0.53202429  | 1           | HNRNPMP1   |
| ENSG00000189171 | 457.9971753 | 550.0514834 | -0.264367621 | 0.532045091 | 0.649423671 | S100A13    |
| ENSG00000256746 | 2.108131562 | 4.12852787  | -0.977430823 | 0.532079278 | 0.649423671 | AC018410.1 |
| ENSG00000237094 | 10.89149558 | 5.777755727 | 0.917828831  | 0.532091978 | 0.649423671 | AL732372.2 |
| ENSG00000248161 | 8.470278255 | 11.3843462  | -0.429707653 | 0.532270707 | 0.649611295 | AC098487.1 |
| ENSG00000090857 | 660.7707401 | 753.9863242 | -0.190147085 | 0.532505244 | 0.649855045 | PDPR       |
| ENSG00000110063 | 525.0466884 | 471.3455672 | 0.155477338  | 0.532520454 | 0.649855045 | DCPS       |
| ENSG00000067900 | 1540.667595 | 1694.361955 | -0.137290259 | 0.532720262 | 0.650068345 | ROCK1      |
| ENSG00000285205 | 2.153476731 | 0.713078025 | 1.588507021  | 0.532995501 | 0.650373666 | AL121612.2 |
| ENSG00000238221 | 1.845120827 | 0.693008929 | 1.389634396  | 0.533044822 | 1           | AL139095.4 |
| ENSG00000279529 | 26.36237164 | 21.17594742 | 0.322192997  | 0.533085777 | 0.650417966 | AC008764.8 |
| ENSG00000273342 | 2.666890443 | 1.10029862  | 1.289655456  | 0.53309862  | 0.650417966 | AP000553.3 |
| ENSG00000155097 | 1161.242996 | 1035.746088 | 0.16532349   | 0.533106908 | 0.650417966 | ATP6V1C1   |
| ENSG00000279640 | 2.108131562 | 4.116631115 | -0.953763002 | 0.533342394 | 0.650674715 | AC138466.5 |
| ENSG00000089818 | 567.3647011 | 632.0359139 | -0.155869759 | 0.533373752 | 0.650682417 | NECAP1     |
| ENSG00000136149 | 101.248552  | 85.65543228 | 0.242676774  | 0.533453854 | 0.650749581 | RPL13AP25  |
| ENSG00000151474 | 1118.644298 | 1389.77266  | -0.31291483  | 0.533528598 | 0.650780008 | FRMD4A     |
| ENSG00000267710 | 10.71792153 | 15.67214257 | -0.54169369  | 0.533528893 | 0.650780008 | EDDM13     |
| ENSG00000146700 | 23.08002304 | 17.58244425 | 0.385668952  | 0.533694261 | 0.650951157 | SSC4D      |
| ENSG00000198862 | 723.3584438 | 788.3416548 | -0.123967724 | 0.53385267  | 0.651113802 | LTN1       |
| ENSG00000185909 | 545.5934469 | 476.0846314 | 0.196740748  | 0.533988825 | 0.651249292 | KLHDC8B    |
| ENSG00000136720 | 749.6686274 | 624.6477839 | 0.262909017  | 0.534300082 | 0.651598312 | HS6ST1     |
| ENSG00000175390 | 3431.022324 | 3830.262977 | -0.158759421 | 0.534355781 | 0.651635652 | EIF3F      |
| ENSG00000181938 | 179.025059  | 144.8337295 | 0.305654533  | 0.534409157 | 0.651670154 | GINS3      |
| ENSG00000115685 | 1075.529482 | 1182.912636 | -0.137509377 | 0.534493902 | 0.651742905 | PPP1R7     |

|                 |             |             |              |             |             |             |
|-----------------|-------------|-------------|--------------|-------------|-------------|-------------|
| ENSG00000138640 | 345.5040121 | 396.2828649 | -0.197463866 | 0.53454716  | 0.651777256 | FAM13A      |
| ENSG00000163376 | 76.67639715 | 56.10997695 | 0.447989819  | 0.534699464 | 0.651932366 | KBTBD8      |
| ENSG00000272172 | 7.584216197 | 4.983245442 | 0.601640716  | 0.534741205 | 0.651952663 | AC138696.2  |
| ENSG00000274351 | 2.359788188 | 0.774441189 | 1.63855594   | 0.534867564 | 0.65207612  | AL137000.1  |
| ENSG00000159648 | 29.05078793 | 44.46489526 | -0.612065233 | 0.535016176 | 0.652226692 | TEPP        |
| ENSG00000274421 | 1.803536605 | 0.713078025 | 1.335659503  | 0.535024284 | 1           | AL162390.1  |
| ENSG00000180090 | 1.803536605 | 0.713078025 | 1.335659503  | 0.535024284 | 1           | OR3A1       |
| ENSG00000174238 | 1633.04768  | 1510.63805  | 0.112544025  | 0.535157791 | 0.652360705 | PITPNA      |
| ENSG00000262333 | 20.48591585 | 16.06064743 | 0.350192772  | 0.535176324 | 0.652360705 | HNRNPA1P16  |
| ENSG00000145700 | 4.481781158 | 2.058957692 | 1.109982269  | 0.535294394 | 0.652474017 | ANKRD31     |
| ENSG00000225075 | 1.229662669 | 2.578361223 | -1.0670056   | 0.53533106  | 0.652488097 | AL603832.1  |
| ENSG00000278765 | 7.896404318 | 5.462510781 | 0.53797685   | 0.535412952 | 0.652553691 | AC004477.3  |
| ENSG00000124383 | 673.756008  | 743.9403189 | -0.143392567 | 0.535435109 | 0.652553691 | MPHOSPH10   |
| ENSG00000134243 | 3941.876014 | 3461.461846 | 0.187407299  | 0.535754014 | 0.652910331 | SORT1       |
| ENSG00000127022 | 464.5892276 | 324.7344168 | 0.516991846  | 0.535781586 | 0.652910331 | CANX        |
| ENSG00000258655 | 94.0711608  | 67.23239742 | 0.482566433  | 0.535803132 | 0.652910331 | ARHGAP5-AS1 |
| ENSG00000215160 | 1.759445085 | 0.387220594 | 2.189919234  | 0.535834585 | 1           | OR7E122P    |
| ENSG00000261611 | 1.759445085 | 0.387220594 | 2.189919234  | 0.535834585 | 1           | AC010547.4  |
| ENSG00000264078 | 1.759445085 | 0.387220594 | 2.189919234  | 0.535834585 | 1           | AC114488.3  |
| ENSG00000229800 | 1.759445085 | 0.387220594 | 2.189919234  | 0.535834585 | 1           | ATP8A2P2    |
| ENSG00000279386 | 2.698374204 | 1.436768536 | 0.912935089  | 0.535924291 | 0.653027342 | AC021106.3  |
| ENSG00000257526 | 2.712235611 | 1.386017859 | 0.949063145  | 0.535984344 | 0.653069889 | AC107032.2  |
| ENSG00000277435 | 3.649911081 | 2.089639274 | 0.785936425  | 0.536064213 | 0.653136575 | AC138649.2  |
| ENSG00000231468 | 0.586481695 | 1.844058227 | -1.635023266 | 0.536085524 | 1           | PRDX3P2     |
| ENSG00000286939 | 0.586481695 | 1.844058227 | -1.635023266 | 0.536085524 | 1           | U82671.1    |
| ENSG00000267408 | 0.586481695 | 1.844058227 | -1.635023266 | 0.536085524 | 1           | AC011498.5  |
| ENSG00000250536 | 2.710981963 | 1.386017859 | 0.948549054  | 0.536176923 | 0.653243265 | ABHD17AP3   |
| ENSG00000236595 | 0.586481695 | 1.90542139  | -1.677553584 | 0.536278596 | 1           | MED15P5     |
| ENSG00000274505 | 0.586481695 | 1.90542139  | -1.677553584 | 0.536278596 | 1           | RF00017     |
| ENSG00000146267 | 71.15463953 | 57.50031434 | 0.305236362  | 0.536404269 | 0.653489605 | FAXC        |
| ENSG00000204677 | 5.238289417 | 2.292641984 | 1.205171538  | 0.536625333 | 0.653728268 | FAM153CP    |
| ENSG00000223505 | 1.788421549 | 0.672939833 | 1.378075745  | 0.536648849 | 1           | AC114402.1  |
| ENSG00000259212 | 3.576843098 | 1.813376645 | 0.987241428  | 0.53668867  | 0.653774772 | AC103739.1  |
| ENSG00000161082 | 0.615458159 | 1.467450118 | -1.254759384 | 0.536804699 | 1           | CELF5       |
| ENSG00000236790 | 2.465593581 | 1.080229524 | 1.188233141  | 0.536872541 | 0.653968095 | LINC00299   |
| ENSG00000142549 | 26.82194903 | 13.67339216 | 0.973333809  | 0.537015578 | 0.654111661 | IGLON5      |
| ENSG00000122674 | 359.0736528 | 312.7356939 | 0.199215393  | 0.537094522 | 0.654177149 | CCZ1        |
| ENSG00000231187 | 11.67726504 | 6.920632683 | 0.745422198  | 0.537397758 | 0.654496964 | AL356056.2  |
| ENSG00000142534 | 14822.54061 | 16439.32479 | -0.149349018 | 0.537414386 | 0.654496964 | RPS11       |
| ENSG00000198551 | 214.3915363 | 240.2545293 | -0.163460691 | 0.537432671 | 0.654496964 | ZNF627      |
| ENSG00000239043 | 1.759445085 | 0.356539013 | 2.189894361  | 0.537455655 | 1           | SNORD127    |
| ENSG00000282097 | 1.759445085 | 0.356539013 | 2.189894361  | 0.537455655 | 1           | AL160408.6  |
| ENSG00000234382 | 1.759445085 | 0.356539013 | 2.189894361  | 0.537455655 | 1           | AL513174.1  |
| ENSG00000213234 | 1.759445085 | 0.356539013 | 2.189894361  | 0.537455655 | 1           | ST13P10     |
| ENSG00000257550 | 2.653029035 | 1.049547942 | 1.331421717  | 0.537471513 | 0.654513587 | AC023509.2  |
| ENSG00000155252 | 809.8258279 | 736.1619552 | 0.138035429  | 0.537580022 | 0.654615043 | PI4K2A      |
| ENSG00000234055 | 0.600343103 | 1.436768536 | -1.253324138 | 0.537581466 | 1           | AL158151.2  |
| ENSG00000256628 | 53.48354538 | 43.78549971 | 0.285327027  | 0.537700693 | 0.654731298 | ZBTB11-AS1  |
| ENSG00000162368 | 2705.229907 | 2948.749066 | -0.124340717 | 0.537848384 | 0.654880441 | CMPK1       |
| ENSG00000225602 | 0.308355904 | 1.548882377 | -2.242012724 | 0.538079151 | 1           | MTOR-AS1    |
| ENSG00000286459 | 0.308355904 | 1.548882377 | -2.242012724 | 0.538079151 | 1           | AP006287.3  |

|                 |             |             |              |             |             |            |
|-----------------|-------------|-------------|--------------|-------------|-------------|------------|
| ENSG00000226148 | 0.307102255 | 1.548882377 | -2.242016282 | 0.538157021 | 1           | SLC25A39P1 |
| ENSG00000270069 | 387.2928721 | 463.7048615 | -0.259169712 | 0.538177053 | 0.655249919 | MIR222HG   |
| ENSG00000281021 | 2.946269883 | 5.685710982 | -0.943476699 | 0.538324596 | 0.655398843 | AL078581.3 |
| ENSG00000181220 | 507.247607  | 550.9725596 | -0.118965842 | 0.538862983 | 0.656023577 | ZNF746     |
| ENSG00000113966 | 179.028392  | 199.5484419 | -0.155751681 | 0.538897292 | 0.656034605 | ARL6       |
| ENSG00000221740 | 1.814890715 | 0.693008929 | 1.369566536  | 0.5389947   | 1           | SNORD93    |
| ENSG00000287348 | 0.293240848 | 1.548882377 | -2.242055702 | 0.53902141  | 1           | AC099535.2 |
| ENSG00000287533 | 0.293240848 | 1.548882377 | -2.242055702 | 0.53902141  | 1           | AC011477.9 |
| ENSG00000229660 | 2.451732174 | 1.080229524 | 1.181328961  | 0.539150005 | 0.656282689 | AC004975.2 |
| novel.588       | 10.29519816 | 6.717501579 | 0.611592803  | 0.5391516   | 0.656282689 | -          |
| ENSG00000283023 | 3.311325065 | 1.548882377 | 1.126491315  | 0.539262728 | 0.656387207 | FRG1GP     |
| ENSG00000273891 | 17.95352253 | 13.38065646 | 0.429106896  | 0.53942996  | 0.656551721 | AL731566.1 |
| ENSG00000128585 | 707.4599716 | 646.0893215 | 0.130921811  | 0.539448428 | 0.656551721 | MKLN1      |
| ENSG00000268543 | 3.330201067 | 5.725849174 | -0.782979841 | 0.539541515 | 0.656634257 | AC012313.4 |
| ENSG00000115159 | 776.0179977 | 933.4950338 | -0.266805587 | 0.539605401 | 0.656680184 | GPD2       |
| ENSG00000178163 | 367.9408824 | 425.2114905 | -0.208888721 | 0.539629804 | 0.656680184 | ZNF518B    |
| ENSG00000237732 | 0.923814062 | 2.261960402 | -1.287306661 | 0.539938152 | 0.657024641 | CT75       |
| ENSG00000181404 | 189.9228076 | 140.2457017 | 0.438249378  | 0.53998048  | 0.657045375 | WASHC1     |
| ENSG00000283563 | 2.727350667 | 1.365948763 | 0.969416377  | 0.540066389 | 0.657119133 | AC098650.1 |
| ENSG00000280303 | 13.99428663 | 18.3640303  | -0.398206264 | 0.540154546 | 0.657182114 | ERICD      |
| ENSG00000223718 | 2.374903244 | 1.10029862  | 1.125794591  | 0.540187896 | 0.657182114 | AC093107.1 |
| ENSG00000226800 | 12.16302721 | 16.65074234 | -0.446662735 | 0.540194035 | 0.657182114 | CACTIN-AS1 |
| ENSG00000060656 | 1010.481338 | 1236.908568 | -0.291678255 | 0.54022065  | 0.65718372  | PTPRU      |
| ENSG00000076826 | 0.879722543 | 2.140389951 | -1.270123958 | 0.540259786 | 0.657200558 | CAMSAP3    |
| ENSG00000196943 | 14.10482188 | 18.9045304  | -0.416823722 | 0.540407558 | 0.657349537 | NOP9       |
| ENSG00000278236 | 2.682005499 | 1.161661783 | 1.241644785  | 0.540503543 | 0.657408388 | RF02271    |
| ENSG00000185339 | 463.0450499 | 321.7196292 | 0.524914564  | 0.540509033 | 0.657408388 | TCN2       |
| novel.513       | 213.1112017 | 176.1326578 | 0.274454491  | 0.540531849 | 0.657408388 | -          |
| ENSG00000225159 | 2.72484337  | 4.402350354 | -0.682846309 | 0.540642873 | 0.657512637 | NPM1P39    |
| ENSG00000104325 | 932.4541209 | 1026.971418 | -0.139479306 | 0.540801062 | 0.657674237 | DECR1      |
| ENSG00000141873 | 415.3923203 | 472.3878887 | -0.186119823 | 0.540993445 | 0.657877402 | SLC39A3    |
| ENSG00000282885 | 4.27672335  | 2.42610919  | 0.798990195  | 0.541156727 | 0.658045161 | AL627171.2 |
| ENSG00000145782 | 1070.619322 | 1155.872804 | -0.110350691 | 0.541210231 | 0.658076672 | ATG12      |
| ENSG00000154485 | 13.78260457 | 9.424578113 | 0.552484499  | 0.541233299 | 0.658076672 | MMP21      |
| ENSG00000250950 | 3.633542376 | 2.180528143 | 0.743939522  | 0.541353683 | 0.658192242 | AC093752.2 |
| ENSG00000212789 | 8.221128927 | 11.18005922 | -0.44386795  | 0.541396817 | 0.65819904  | ST13P5     |
| ENSG00000182224 | 2.699627853 | 4.758889366 | -0.809107119 | 0.541454547 | 0.65819904  | CYB5D1     |
| ENSG00000244124 | 13.56751757 | 10.05737975 | 0.433174229  | 0.541459273 | 0.65819904  | ATP1B3-AS1 |
| ENSG00000103199 | 250.6820853 | 279.8747834 | -0.157930033 | 0.541461093 | 0.65819904  | ZNF500     |
| novel.504       | 15.64452138 | 24.00245823 | -0.620416246 | 0.541485943 | 0.65819904  | -          |
| ENSG00000243267 | 0.921306765 | 2.649180997 | -1.520544375 | 0.541580704 | 0.658283428 | RN7SL614P  |
| ENSG00000115474 | 3.9859898   | 2.241891306 | 0.845794854  | 0.541762596 | 0.658473709 | KCNJ13     |
| ENSG00000196214 | 312.0939026 | 275.6293555 | 0.178393734  | 0.541789127 | 0.658475151 | ZNF766     |
| ENSG00000139865 | 1.21705491  | 2.557136252 | -1.068516542 | 0.541913461 | 0.658594103 | TTC6       |
| ENSG00000279080 | 0.925067711 | 2.618499415 | -1.500675407 | 0.541937698 | 0.658594103 | AL022322.2 |
| ENSG00000259010 | 2.682005499 | 5.199300783 | -0.956812358 | 0.542080212 | 0.658736482 | AL049869.1 |
| ENSG00000169116 | 115.9650711 | 95.84494779 | 0.276750848  | 0.542241194 | 0.658901289 | PARM1      |
| ENSG00000254245 | 30.27772948 | 40.68601833 | -0.42299097  | 0.542383664 | 0.659043586 | PCDHGA3    |
| ENSG00000163485 | 10.5481797  | 14.24611491 | -0.434565176 | 0.542509982 | 0.659160519 | ADORA1     |
| ENSG00000184254 | 1098.152657 | 775.4254913 | 0.502170071  | 0.54253064  | 0.659160519 | ALDH1A3    |
| ENSG00000130821 | 1241.823627 | 1010.079912 | 0.298260844  | 0.542575824 | 0.659184591 | SLC6A8     |

|                 |             |             |              |             |             |            |
|-----------------|-------------|-------------|--------------|-------------|-------------|------------|
| ENSG00000200591 | 0.61420451  | 1.874739808 | -1.607482161 | 0.542608754 | 1           | RF00019    |
| ENSG00000143162 | 1516.316889 | 1288.383062 | 0.23491201   | 0.542682434 | 0.659283284 | CREG1      |
| ENSG00000171116 | 0.925067711 | 2.160459047 | -1.230897438 | 0.542817586 | 0.65941664  | HSFX1      |
| novel.660       | 18.33877863 | 11.88008462 | 0.632458492  | 0.542854776 | 0.659430986 | -          |
| ENSG00000100503 | 1178.540969 | 1053.622551 | 0.161544452  | 0.542905631 | 0.659461929 | NIN        |
| ENSG00000280233 | 1.833766717 | 0.713078025 | 1.355900741  | 0.54291988  | 1           | AC015813.7 |
| ENSG00000259531 | 1.833766717 | 0.713078025 | 1.355900741  | 0.54291988  | 1           | AC022306.1 |
| ENSG00000231010 | 9.399106912 | 6.286546772 | 0.590156659  | 0.542955081 | 0.659491162 | AL121672.1 |
| ENSG00000148426 | 252.0068121 | 332.435659  | -0.400142215 | 0.543165595 | 0.659716017 | PROSER2    |
| ENSG00000182718 | 36471.09659 | 41984.78369 | -0.203119272 | 0.543272088 | 0.659778285 | ANXA2      |
| ENSG00000271797 | 7.386751553 | 3.384768263 | 1.113830526  | 0.543278972 | 0.659778285 | AC008494.3 |
| ENSG00000125454 | 126.2660393 | 103.78544   | 0.280725938  | 0.543301083 | 0.659778285 | SLC25A19   |
| ENSG00000173933 | 267.3473515 | 235.5395026 | 0.183583886  | 0.54331844  | 0.659778285 | RBM4       |
| ENSG00000255121 | 2.12199297  | 0.713078025 | 1.56947097   | 0.543370694 | 0.659810899 | AP003392.4 |
| ENSG00000185261 | 28.21125342 | 23.07332486 | 0.284939034  | 0.543399819 | 0.659815428 | KIAA0825   |
| ENSG00000260428 | 26.11189739 | 31.81781828 | -0.287149368 | 0.543433277 | 0.659825215 | SCX        |
| ENSG00000260747 | 3.969621095 | 6.084699937 | -0.620529987 | 0.54362354  | 0.660025384 | AC022968.1 |
| ENSG00000198535 | 2.128261214 | 4.494523493 | -1.085655546 | 0.543682665 | 0.660066323 | C2CD4A     |
| ENSG00000210195 | 18.96899584 | 12.51288626 | 0.606518624  | 0.543735729 | 0.660099901 | MT-TT      |
| ENSG00000213337 | 120.5373291 | 107.7362056 | 0.16204328   | 0.543792545 | 0.66013803  | ANKRD39    |
| ENSG00000286503 | 0.907445357 | 2.292641984 | -1.323298093 | 0.544154679 | 0.660546779 | AC008462.1 |
| ENSG00000204929 | 9.49989771  | 6.410557368 | 0.561828383  | 0.544199955 | 0.660548836 | AC007389.1 |
| novel.850       | 14.19558349 | 19.65761823 | -0.462748357 | 0.544212171 | 0.660548836 | -          |
| ENSG00000228172 | 8.20726752  | 5.798980698 | 0.504900956  | 0.544232647 | 0.660548836 | AL020996.1 |
| ENSG00000100014 | 886.4566518 | 1014.29666  | -0.194664204 | 0.544338946 | 0.660625988 | SPECC1L    |
| ENSG00000158747 | 2716.329434 | 1948.92     | 0.478953269  | 0.544347067 | 0.660625988 | NBL1       |
| ENSG00000172179 | 1.7871679   | 0.693008929 | 1.350990038  | 0.544535866 | 1           | PRL        |
| ENSG00000188021 | 1001.907668 | 929.1851699 | 0.1085362    | 0.544667725 | 0.660984266 | UBQLN2     |
| ENSG00000150054 | 62.6706855  | 41.91345684 | 0.578164185  | 0.544864039 | 0.661173219 | MPP7       |
| ENSG00000257135 | 44.82199945 | 37.51542602 | 0.252133421  | 0.544897822 | 0.661173219 | ODC1-DT    |
| ENSG00000198707 | 631.9357953 | 688.1418493 | -0.123095967 | 0.544899771 | 0.661173219 | CEP290     |
| ENSG00000269973 | 107.2023074 | 91.73769207 | 0.227451578  | 0.544954524 | 0.661208774 | AC010969.2 |
| ENSG00000163738 | 195.5764556 | 173.3948528 | 0.17512408   | 0.545273556 | 0.661557411 | MTHFD2L    |
| ENSG00000198455 | 185.9961102 | 168.8547158 | 0.139941813  | 0.545293335 | 0.661557411 | ZXDB       |
| novel.237       | 14.33795851 | 10.3230299  | 0.469447328  | 0.545318252 | 0.661557411 | -          |
| ENSG00000248898 | 11.09934542 | 7.999577937 | 0.480324521  | 0.545530004 | 0.661783398 | AC022126.1 |
| ENSG00000157181 | 452.5094678 | 493.6432006 | -0.125811257 | 0.545633021 | 0.661854576 | ODR4       |
| ENSG00000254221 | 7.973233248 | 5.104815894 | 0.645995959  | 0.545661421 | 0.661854576 | PCDHGB1    |
| ENSG00000267319 | 2.460578986 | 1.029478846 | 1.233499797  | 0.545665102 | 0.661854576 | SELENOKP1  |
| ENSG00000276168 | 2363.653876 | 2831.560505 | -0.260601949 | 0.545805557 | 0.661994033 | RN7SL1     |
| ENSG00000125122 | 88.00909302 | 76.10034068 | 0.207787916  | 0.546133866 | 0.66236131  | LRRC29     |
| ENSG00000287678 | 16.45325596 | 23.27375903 | -0.494356825 | 0.546186108 | 0.662393748 | AL031778.1 |
| ENSG00000234297 | 0.922560414 | 2.221822211 | -1.266601474 | 0.54638453  | 0.662603457 | AL592293.2 |
| ENSG00000267293 | 3.604565913 | 2.129777466 | 0.755242043  | 0.546638293 | 0.662880257 | AC012569.1 |
| ENSG00000172663 | 636.2511965 | 569.1002902 | 0.161399049  | 0.546691585 | 0.662913939 | TMEM134    |
| ENSG00000236533 | 2.096777453 | 3.557089392 | -0.760530672 | 0.546744704 | 0.66294741  | AC009413.1 |
| ENSG00000132518 | 6.338184824 | 3.423622185 | 0.904441868  | 0.546996998 | 0.663222373 | GUCY2D     |
| ENSG00000104129 | 291.707682  | 329.8390484 | -0.177459909 | 0.547024672 | 0.663224975 | DNAJC17    |
| ENSG00000268087 | 34.13144472 | 28.13556242 | 0.280944564  | 0.54708527  | 0.663252981 | AC008764.2 |
| ENSG00000262652 | 1.495180701 | 2.862924587 | -0.932847657 | 0.547098827 | 0.663252981 | AC124283.3 |
| ENSG00000159884 | 272.7934911 | 241.6643407 | 0.175672745  | 0.547254994 | 0.66339387  | CCDC107    |

|                 |             |             |              |             |             |            |
|-----------------|-------------|-------------|--------------|-------------|-------------|------------|
| ENSG00000213762 | 324.1017057 | 353.1374057 | -0.123606015 | 0.547266111 | 0.66339387  | ZNF134     |
| ENSG00000176387 | 4.870726937 | 2.893606169 | 0.752884676  | 0.547398404 | 0.663496156 | HSD11B2    |
| ENSG00000270165 | 3.547866634 | 6.123682254 | -0.779914152 | 0.547406073 | 0.663496156 | AC010530.1 |
| ENSG00000244026 | 326.7116121 | 365.1589199 | -0.160927831 | 0.547427104 | 0.663496156 | FAM86DP    |
| ENSG00000089063 | 2406.196303 | 2603.937716 | -0.113996027 | 0.547649306 | 0.663734507 | TMEM230    |
| ENSG00000227744 | 1.846374476 | 0.743759607 | 1.326530169  | 0.547706671 | 1           | LINC01940  |
| ENSG00000231784 | 10.64889923 | 14.41959192 | -0.437651997 | 0.547719455 | 0.66378856  | DBIL5P     |
| ENSG00000196388 | 106.8287614 | 90.88250777 | 0.230944684  | 0.547783108 | 0.663833792 | INCA1      |
| ENSG00000280374 | 11.56644505 | 15.73607427 | -0.452108398 | 0.547807879 | 0.663833792 | AC019080.5 |
| ENSG00000250999 | 1.218308559 | 2.476859868 | -1.030823993 | 0.547932978 | 0.663954419 | AC136604.3 |
| ENSG00000249031 | 28.69826923 | 35.28170705 | -0.299174179 | 0.548152456 | 0.664189393 | SUMO2P6    |
| ENSG00000257809 | 0.61420451  | 1.844058227 | -1.586714801 | 0.548252631 | 1           | AC034102.6 |
| ENSG00000268583 | 11.48453025 | 8.274684691 | 0.474268656  | 0.548319231 | 0.664360488 | AC011466.1 |
| ENSG00000228328 | 0.908699006 | 1.823989131 | -0.997806551 | 0.548438949 | 0.66445085  | AL158201.1 |
| ENSG00000287780 | 5.089646153 | 2.772035718 | 0.86599083   | 0.548444959 | 0.66445085  | AC104850.2 |
| ENSG00000089558 | 4.313221706 | 2.149846562 | 1.000762794  | 0.548501083 | 0.664487859 | KCNH4      |
| ENSG00000164002 | 78.50772785 | 91.14212175 | -0.216281511 | 0.54854704  | 0.664512549 | EXO5       |
| ENSG00000112983 | 1076.705155 | 1199.300459 | -0.155612268 | 0.548578107 | 0.6645192   | BRD8       |
| ENSG00000287109 | 3.94189828  | 2.261960402 | 0.823822915  | 0.54872247  | 0.664663084 | AP000224.1 |
| ENSG00000154162 | 0.615458159 | 1.41669944  | -1.218620034 | 0.548790348 | 1           | CDH12      |
| ENSG00000115419 | 1812.2648   | 1615.749022 | 0.165373091  | 0.548864797 | 0.664776657 | GLS        |
| ENSG00000224418 | 7.287214403 | 9.926352693 | -0.452010929 | 0.548867406 | 0.664776657 | STK24-AS1  |
| ENSG00000261646 | 0.601596751 | 1.936102971 | -1.672086132 | 0.548991528 | 1           | AC093849.1 |
| ENSG00000281491 | 1.801029308 | 0.723690511 | 1.322400303  | 0.549006671 | 1           | DNAJB5-DT  |
| ENSG00000140859 | 4143.825728 | 3358.288489 | 0.303304145  | 0.549101451 | 0.66501079  | KIFC3      |
| ENSG00000263235 | 2.697120555 | 4.42241945  | -0.698601421 | 0.549111908 | 0.66501079  | AC006111.2 |
| ENSG00000056736 | 54.76259889 | 44.48449763 | 0.295924978  | 0.549296114 | 0.665202868 | IL17RB     |
| ENSG00000159023 | 205.8135427 | 158.04531   | 0.381736513  | 0.549327387 | 0.665209734 | EPB41      |
| ENSG00000258279 | 0.616711807 | 1.90542139  | -1.624034258 | 0.549360379 | 1           | LINC00592  |
| ENSG00000202314 | 6.066398547 | 8.458902575 | -0.487700013 | 0.549516077 | 0.665379656 | SNORD6     |
| ENSG00000227077 | 6.130619718 | 9.203818057 | -0.593084394 | 0.549523794 | 0.665379656 | AC107983.1 |
| ENSG00000064933 | 476.3874567 | 536.3738054 | -0.171229942 | 0.549544539 | 0.665379656 | PMS1       |
| ENSG00000115758 | 1800.132388 | 2318.971051 | -0.365473754 | 0.549580994 | 0.665392786 | ODC1       |
| ENSG00000275023 | 2.096777453 | 1.080229524 | 0.963222134  | 0.549661716 | 0.665459508 | MLLT6      |
| ENSG00000232952 | 5.44968674  | 3.506338714 | 0.62425634   | 0.549786292 | 0.665579314 | AL512844.1 |
| ENSG00000161036 | 508.5576613 | 594.2331117 | -0.224904908 | 0.54981382  | 0.665581626 | LRWD1      |
| ENSG00000223811 | 3.687734357 | 1.345879667 | 1.435949601  | 0.549847981 | 0.665591968 | AL589684.1 |
| ENSG00000168539 | 2.082916045 | 0.713078025 | 1.545353544  | 0.549909492 | 0.665604403 | CHRM1      |
| ENSG00000240244 | 2.082916045 | 0.713078025 | 1.545353544  | 0.549909492 | 0.665604403 | GAPDHP33   |
| ENSG00000242294 | 119.4927089 | 98.77681276 | 0.275333654  | 0.55002759  | 0.665716333 | STAG3L5P   |
| ENSG00000260774 | 8.092615314 | 11.08801448 | -0.451657279 | 0.550073966 | 0.66574145  | AC021087.3 |
| ENSG00000171989 | 2.403879708 | 1.069617038 | 1.165774983  | 0.550334506 | 0.66602575  | LDHAL6B    |
| ENSG00000145990 | 80.59476084 | 58.9399082  | 0.449110967  | 0.550383809 | 0.666054392 | GFOD1      |
| ENSG00000282100 | 1.828752122 | 0.693008929 | 1.380087559  | 0.550425166 | 1           | HSP90AB4P  |
| ENSG00000234203 | 0.925067711 | 2.558292127 | -1.47014504  | 0.550498253 | 0.666161859 | AC004771.2 |
| ENSG00000058799 | 340.9135626 | 374.548754  | -0.136389926 | 0.550543334 | 0.666162076 | YIPF1      |
| ENSG00000197813 | 7.920294916 | 11.96267275 | -0.588610585 | 0.550549713 | 0.666162076 | AC011450.1 |
| ENSG00000225067 | 1.832513069 | 3.200550379 | -0.812175412 | 0.550668659 | 0.666230283 | RPL23AP2   |
| ENSG00000260179 | 7.20279231  | 4.362212162 | 0.729375181  | 0.55067086  | 0.666230283 | AL162741.1 |
| ENSG00000123094 | 1362.824621 | 1201.21657  | 0.18229348   | 0.550683012 | 0.666230283 | RASSF8     |
| ENSG00000175182 | 508.3951139 | 599.3394308 | -0.236904512 | 0.550759389 | 0.66629166  | FAM131A    |

|                 |             |             |              |             |             |              |
|-----------------|-------------|-------------|--------------|-------------|-------------|--------------|
| ENSG00000226332 | 28.12049181 | 22.16670074 | 0.337557561  | 0.550867628 | 0.666391574 | AL354836.1   |
| ENSG00000268655 | 6.694464465 | 4.453101031 | 0.601755456  | 0.550961285 | 0.66647384  | AC008687.4   |
| ENSG00000272006 | 2.06654734  | 0.672939833 | 1.596246885  | 0.551108993 | 0.666589642 | AC037487.3   |
| ENSG00000267042 | 4.528379975 | 2.813329785 | 0.676935318  | 0.551122712 | 0.666589642 | AC100793.2   |
| ENSG00000263345 | 23.77703999 | 29.30783669 | -0.29753281  | 0.55113864  | 0.666589642 | AC006435.2   |
| ENSG00000279822 | 13.99811884 | 18.74051001 | -0.421267332 | 0.551159643 | 0.666589642 | AC016397.2   |
| ENSG00000164296 | 115.3028715 | 130.9983719 | -0.184933293 | 0.551312967 | 0.666744039 | TIGD6        |
| ENSG00000255775 | 4.203655366 | 2.446178286 | 0.770558834  | 0.551392363 | 0.66680902  | AC005845.1   |
| ENSG00000283611 | 1.50778846  | 2.92428775  | -0.948346167 | 0.55152937  | 0.666943662 | TMEM274P     |
| ENSG00000233539 | 1.832513069 | 0.774441189 | 1.28151072   | 0.551609875 | 1           | AC011294.1   |
| ENSG00000240429 | 17.58373748 | 13.05377155 | 0.42382941   | 0.551701443 | 0.667120692 | LRRFIP1P1    |
| ENSG00000168101 | 592.6012624 | 661.8613219 | -0.159918987 | 0.551802724 | 0.667212108 | NUDT16L1     |
| ENSG00000109171 | 1274.26889  | 1154.41571  | 0.142607106  | 0.551835968 | 0.667221253 | SLAIN2       |
| ENSG00000222035 | 1.83125942  | 0.774441189 | 1.280698551  | 0.551859219 | 1           | KIAA2012-AS1 |
| ENSG00000181472 | 293.4378938 | 340.2692775 | -0.214400228 | 0.552009975 | 0.667400584 | ZBTB2        |
| ENSG00000237101 | 4.1771862   | 2.547679642 | 0.725428425  | 0.55213465  | 0.667520258 | AC092809.4   |
| ENSG00000137274 | 237.4684113 | 216.7010872 | 0.132765048  | 0.55224145  | 0.667618311 | BPHL         |
| ENSG00000121749 | 848.4602796 | 767.8700055 | 0.144309521  | 0.552313744 | 0.667643219 | TBC1D15      |
| ENSG00000200769 | 6.564697203 | 4.096562019 | 0.696969709  | 0.552331897 | 0.667643219 | RF00019      |
| ENSG00000249288 | 2.150969433 | 0.713078025 | 1.587485907  | 0.552339146 | 0.667643219 | SLC25A15P5   |
| ENSG00000160218 | 432.9539628 | 479.3909208 | -0.147368983 | 0.552483178 | 0.66778625  | TRAPPC10     |
| ENSG00000119900 | 2635.583239 | 2870.122795 | -0.1231001   | 0.552536583 | 0.667788417 | OGFRL1       |
| ENSG00000260757 | 2.11063886  | 1.029478846 | 1.00870788   | 0.55256382  | 0.667788417 | AC093520.1   |
| ENSG00000264365 | 1.17296339  | 3.108505634 | -1.402909428 | 0.552577391 | 0.667788417 | AC023983.1   |
| ENSG00000280003 | 2.76893489  | 1.00940975  | 1.432052224  | 0.552587783 | 0.667788417 | AC097637.2   |
| ENSG00000231407 | 9.107119713 | 6.53212782  | 0.483782992  | 0.552672365 | 0.667835064 | GORAB-AS1    |
| ENSG00000233980 | 2.461832635 | 1.060160428 | 1.205782561  | 0.552677792 | 0.667835064 | FDPSP2       |
| ENSG00000287646 | 0.616711807 | 1.885352294 | -1.610280157 | 0.55302236  | 1           | AC021701.1   |
| ENSG00000266987 | 0.586481695 | 2.323323566 | -1.970831459 | 0.553303968 | 0.668560618 | AC104984.5   |
| ENSG00000138495 | 642.8338438 | 595.1953071 | 0.110920396  | 0.553411539 | 0.668625833 | COX17        |
| ENSG00000273888 | 38.69241992 | 29.79655864 | 0.38012366   | 0.553422965 | 0.668625833 | FRMD6-AS1    |
| ENSG00000267160 | 2.697120555 | 1.365948763 | 0.957559742  | 0.553435146 | 0.668625833 | AC091152.2   |
| ENSG00000176386 | 193.536334  | 221.9774535 | -0.198307661 | 0.553639894 | 0.668842095 | CDC26        |
| ENSG00000169016 | 273.5911845 | 243.5209848 | 0.16737159   | 0.553776518 | 0.668968313 | E2F6         |
| ENSG00000236494 | 3.857476187 | 1.783850939 | 1.114009561  | 0.553795869 | 0.668968313 | AC008080.4   |
| ENSG00000272056 | 3.647403784 | 2.211209725 | 0.735871401  | 0.55387612  | 0.669034147 | AC013472.3   |
| ENSG00000273284 | 10.55194065 | 13.62508163 | -0.367364095 | 0.553925185 | 0.669062307 | AP001033.2   |
| ENSG00000175920 | 0.308355904 | 1.130980201 | -1.785775237 | 0.553971475 | 1           | DOK7         |
| ENSG00000234949 | 0.308355904 | 1.130980201 | -1.785775237 | 0.553971475 | 1           | AC104667.2   |
| ENSG00000252652 | 0.308355904 | 1.130980201 | -1.785775237 | 0.553971475 | 1           | RF00019      |
| ENSG00000269153 | 0.308355904 | 1.130980201 | -1.785775237 | 0.553971475 | 1           | LYPLA2P2     |
| ENSG00000244723 | 3.871337594 | 6.581722622 | -0.757446615 | 0.553973848 | 0.669089979 | ASLP1        |
| ENSG00000182931 | 0.307102255 | 1.130980201 | -1.785780775 | 0.554060077 | 1           | WFDC10B      |
| ENSG00000235584 | 0.307102255 | 1.130980201 | -1.785780775 | 0.554060077 | 1           | AC008268.1   |
| ENSG00000272589 | 0.307102255 | 1.130980201 | -1.785780775 | 0.554060077 | 1           | ZSWIM8-AS1   |
| ENSG00000275854 | 19.00961115 | 14.33114319 | 0.399967713  | 0.554146327 | 0.669237291 | AC084824.4   |
| ENSG00000260269 | 3.064683035 | 4.923038154 | -0.695471666 | 0.554147333 | 0.669237291 | AC105036.3   |
| ENSG00000176624 | 913.406561  | 819.4653426 | 0.156864525  | 0.554315096 | 0.669408781 | MEX3C        |
| ENSG00000120833 | 256.5602217 | 311.3352233 | -0.279998986 | 0.554432074 | 0.669518927 | SOCS2        |
| ENSG00000101440 | 5.544138023 | 2.649180997 | 1.076052311  | 0.554490128 | 0.669549695 | ASIP         |
| novel.500       | 53.3309862  | 45.17480962 | 0.242363302  | 0.554509095 | 0.669549695 | -            |

|                 |             |             |              |             |             |             |
|-----------------|-------------|-------------|--------------|-------------|-------------|-------------|
| ENSG00000285973 | 9.778023502 | 6.625456834 | 0.549193     | 0.554586853 | 0.669612466 | AC063960.2  |
| ENSG00000006712 | 1117.485177 | 1229.47491  | -0.137859727 | 0.554724327 | 0.669747327 | PAF1        |
| ENSG00000123268 | 366.5594284 | 412.8856947 | -0.172209841 | 0.554863241 | 0.669863792 | ATF1        |
| ENSG00000185340 | 961.855019  | 1068.410699 | -0.151837387 | 0.554872355 | 0.669863792 | GAS2L1      |
| novel.782       | 113.8846192 | 160.9262747 | -0.499411249 | 0.554905224 | 0.669872346 | -           |
| ENSG00000113924 | 2.756327131 | 1.365948763 | 0.984387008  | 0.555009658 | 0.669967287 | HGD         |
| ENSG00000271858 | 0.293240848 | 1.130980201 | -1.785842169 | 0.555044848 | 1           | Z84492.1    |
| ENSG00000280326 | 0.293240848 | 1.130980201 | -1.785842169 | 0.555044848 | 1           | AC067931.2  |
| ENSG00000279555 | 0.293240848 | 1.130980201 | -1.785842169 | 0.555044848 | 1           | AC091181.1  |
| ENSG00000207550 | 0.293240848 | 1.130980201 | -1.785842169 | 0.555044848 | 1           | MIR99B      |
| ENSG00000229962 | 0.293240848 | 1.130980201 | -1.785842169 | 0.555044848 | 1           | AP000221.1  |
| ENSG00000182218 | 105.4905284 | 138.9628203 | -0.398395054 | 0.555091246 | 0.670010897 | HHIPL1      |
| ENSG00000255328 | 2.697120555 | 4.810924314 | -0.841866733 | 0.555137371 | 0.670010897 | AC136475.5  |
| ENSG00000008056 | 40.2006353  | 48.4794299  | -0.272831605 | 0.555141693 | 0.670010897 | SYN1        |
| ENSG00000250508 | 10.42621907 | 6.584162767 | 0.652051226  | 0.555148939 | 0.670010897 | AP000808.1  |
| ENSG00000277290 | 10.34820776 | 14.90014152 | -0.529179581 | 0.555292738 | 0.670153318 | AC136475.10 |
| ENSG00000257279 | 3.04831433  | 1.426156051 | 1.090973102  | 0.555321116 | 0.670156436 | AC127164.1  |
| ENSG00000272163 | 5.232021173 | 8.95695274  | -0.773201395 | 0.555449716 | 0.670280496 | AF106564.1  |
| ENSG00000150773 | 18.80455334 | 23.05325576 | -0.298915419 | 0.555719446 | 0.670567394 | PIH1D2      |
| ENSG00000279041 | 29.723487   | 41.34988673 | -0.474478504 | 0.555739083 | 0.670567394 | AC102945.2  |
| ENSG00000132205 | 373.1595125 | 464.9267212 | -0.317753565 | 0.555919984 | 0.670754522 | EMILIN2     |
| ENSG00000203930 | 86.30896922 | 113.4226401 | -0.392812691 | 0.556024189 | 0.670849098 | LINC00632   |
| ENSG00000170558 | 936.9353931 | 1111.923206 | -0.247204095 | 0.556066688 | 0.670869218 | CDH2        |
| ENSG00000270022 | 2.125753916 | 1.049547942 | 1.000651308  | 0.556134375 | 0.670888572 | Z93241.1    |
| ENSG00000214535 | 2.125753916 | 1.049547942 | 1.000651308  | 0.556134375 | 0.670888572 | RPS15AP1    |
| ENSG00000278601 | 5.045554633 | 2.415496705 | 1.05440744   | 0.556233498 | 0.670976994 | AL158163.2  |
| ENSG00000233766 | 2.158491326 | 0.693008929 | 1.623424389  | 0.556302133 | 0.671028633 | AC098617.1  |
| ENSG00000144792 | 2.124500267 | 1.049547942 | 1.000005847  | 0.556369721 | 0.671030418 | ZNF660      |
| ENSG00000163703 | 802.4457562 | 932.0026186 | -0.215649292 | 0.556401865 | 0.671030418 | CRELD1      |
| ENSG00000276174 | 3.006730108 | 1.345879667 | 1.135507019  | 0.556432965 | 0.671030418 | AC087683.2  |
| ENSG00000136802 | 1533.291853 | 1726.067006 | -0.170808631 | 0.556441499 | 0.671030418 | LRRC8A      |
| ENSG00000166783 | 75.33182573 | 94.17436656 | -0.320745117 | 0.556450685 | 0.671030418 | MARF1       |
| ENSG00000285872 | 3.313832363 | 5.084746798 | -0.61049207  | 0.556471884 | 0.671030418 | AC007240.1  |
| ENSG00000100139 | 781.8213288 | 865.6054551 | -0.146823942 | 0.556484407 | 0.671030418 | MICALL1     |
| ENSG00000223374 | 25.79573486 | 20.34014307 | 0.348238537  | 0.556593461 | 0.671105333 | AC005104.1  |
| ENSG00000111237 | 1428.578721 | 1307.507724 | 0.127598959  | 0.556611548 | 0.671105333 | VPS29       |
| ENSG00000269961 | 7.948017731 | 5.259508071 | 0.584300552  | 0.55664268  | 0.671105333 | AC010359.1  |
| ENSG00000187801 | 27.33905276 | 34.08461179 | -0.319134934 | 0.556649857 | 0.671105333 | ZFP69B      |
| ENSG00000157036 | 229.3213193 | 261.0519889 | -0.187690868 | 0.556692782 | 0.671118595 | EXOG        |
| ENSG00000117036 | 561.707548  | 613.4843137 | -0.126984506 | 0.556733427 | 0.671118595 | ETV3        |
| ENSG00000285596 | 7.142332086 | 10.89318411 | -0.602714489 | 0.55673835  | 0.671118595 | AC017116.2  |
| ENSG00000236942 | 1.801029308 | 0.743759607 | 1.296495013  | 0.556789628 | 1           | AC096533.1  |
| ENSG00000267505 | 3.255879435 | 5.971301827 | -0.862555658 | 0.556837611 | 0.671197042 | AC005180.2  |
| ENSG00000258768 | 23.36559945 | 17.57756396 | 0.415072819  | 0.556855096 | 0.671197042 | AL356019.2  |
| ENSG00000130703 | 772.270301  | 699.1027242 | 0.144000757  | 0.556969227 | 0.671303465 | OSBPL2      |
| ENSG00000143633 | 196.9175077 | 228.9921516 | -0.219012344 | 0.557042265 | 0.671355958 | C1orf131    |
| ENSG00000254064 | 23.58584359 | 19.25991354 | 0.297911849  | 0.55706446  | 0.671355958 | AC105206.2  |
| ENSG00000100852 | 799.6150525 | 683.0081962 | 0.227090872  | 0.557127052 | 0.67135616  | ARHGAP5     |
| novel.289       | 2.683259148 | 1.467450118 | 0.888616524  | 0.557142149 | 0.67135616  | -           |
| ENSG00000276103 | 2.683259148 | 1.467450118 | 0.888616524  | 0.557142149 | 0.67135616  | RF00015     |
| ENSG00000114650 | 1518.615552 | 1656.275408 | -0.125232161 | 0.557206063 | 0.671402037 | SCAP        |

|                 |             |             |              |             |             |            |
|-----------------|-------------|-------------|--------------|-------------|-------------|------------|
| ENSG00000178927 | 998.5349407 | 1103.795402 | -0.144775083 | 0.557300112 | 0.671484218 | CYBC1      |
| ENSG00000271236 | 1.803536605 | 0.774441189 | 1.262514857  | 0.557452559 | 1           | SUMO2P15   |
| ENSG00000126107 | 821.4695447 | 909.5985345 | -0.146704359 | 0.557486291 | 0.671677394 | HECTD3     |
| ENSG00000274487 | 7.557818302 | 11.13863676 | -0.551378868 | 0.557534521 | 0.671704354 | AC244154.1 |
| ENSG00000147127 | 20.12712891 | 15.69349593 | 0.358587405  | 0.557580217 | 0.671728258 | RAB41      |
| ENSG00000235790 | 32.04580792 | 42.09454543 | -0.389844172 | 0.557691786 | 0.671813072 | AC114488.2 |
| ENSG00000226935 | 2.149715785 | 0.693008929 | 1.618056136  | 0.557702334 | 0.671813072 | LINC00161  |
| ENSG00000059145 | 335.7106323 | 369.8287998 | -0.139807071 | 0.557765476 | 0.671844826 | UNKL       |
| ENSG00000140284 | 4.499403511 | 2.802717299 | 0.673006112  | 0.557780413 | 0.671844826 | SLC27A2    |
| ENSG00000179399 | 1.835020366 | 3.515795324 | -0.947029518 | 0.557856607 | 0.671905452 | GPC5       |
| ENSG00000278995 | 1.814890715 | 0.743759607 | 1.30540157   | 0.557901811 | 1           | Z69720.2   |
| ENSG00000121766 | 706.2952703 | 770.0037301 | -0.124381656 | 0.557948086 | 0.671955931 | ZCCHC17    |
| ENSG00000180370 | 1821.42858  | 1968.481972 | -0.112054761 | 0.557950244 | 0.671955931 | PAK2       |
| novel.971       | 28.74870027 | 36.29098841 | -0.335773243 | 0.55823432  | 0.672266889 | -          |
| ENSG00000241217 | 2.429095225 | 1.029478846 | 1.218142008  | 0.558339534 | 0.67236243  | RN7SL809P  |
| ENSG00000278000 | 10.8426742  | 14.70402689 | -0.431351802 | 0.558402108 | 0.672406617 | AC139100.2 |
| ENSG00000236098 | 3.079798091 | 5.279577167 | -0.787466136 | 0.558482754 | 0.67247256  | AC097059.2 |
| ENSG00000113328 | 1910.715736 | 2154.687153 | -0.173357519 | 0.558627209 | 0.672615327 | CCNG1      |
| ENSG00000183569 | 66.54173836 | 84.97598955 | -0.352379985 | 0.558755852 | 0.672739042 | SERHL2     |
| ENSG00000154743 | 184.3907224 | 214.8239541 | -0.221066392 | 0.558885566 | 0.672864036 | TSEN2      |
| novel.623       | 0.908699006 | 1.773238453 | -0.970801641 | 0.559009798 | 1           | -          |
| ENSG00000205138 | 332.3320375 | 298.6485095 | 0.154373631  | 0.559059194 | 0.673041885 | SDHAF1     |
| ENSG00000286161 | 1.214547612 | 2.731897526 | -1.180867629 | 0.559102522 | 0.673043635 | AC104066.3 |
| ENSG00000189320 | 8.012238901 | 4.299693123 | 0.895601451  | 0.559129434 | 0.673043635 | FAM180A    |
| ENSG00000183878 | 291.1547071 | 89.89642481 | 1.695265107  | 0.559156435 | 0.673043635 | UTY        |
| ENSG00000233846 | 4.237646425 | 6.144907225 | -0.532923936 | 0.559164269 | 0.673043635 | SELENOTP1  |
| ENSG00000238516 | 0.586481695 | 1.722487775 | -1.549777442 | 0.559313338 | 1           | RF00019    |
| ENSG00000275807 | 19.87296499 | 15.79499729 | 0.332899005  | 0.559338791 | 0.673222511 | AC145285.6 |
| ENSG00000265727 | 3.018084217 | 1.426156051 | 1.07848483   | 0.559506844 | 0.673393585 | RN7SL648P  |
| ENSG00000137970 | 1690.886997 | 1848.563773 | -0.128711447 | 0.559535863 | 0.673397316 | RPL7P9     |
| ENSG00000259366 | 14.09729999 | 18.47485987 | -0.384953446 | 0.55964935  | 0.673502699 | AC108449.2 |
| ENSG00000275901 | 0.308355904 | 1.110911105 | -1.763581827 | 0.559709266 | 1           | RF00017    |
| ENSG00000271415 | 0.308355904 | 1.110911105 | -1.763581827 | 0.559709266 | 1           | RPL23AP90  |
| ENSG00000254532 | 0.308355904 | 1.110911105 | -1.763581827 | 0.559709266 | 1           | AL358944.1 |
| ENSG00000207004 | 3.047060681 | 1.773238453 | 0.771038221  | 0.559753567 | 0.673596916 | RNU6-301P  |
| ENSG00000257179 | 0.307102255 | 1.110911105 | -1.763585577 | 0.559799024 | 1           | HMG2P6     |
| ENSG00000140995 | 1362.046273 | 1486.833073 | -0.126273025 | 0.559896893 | 0.673738186 | DEF8       |
| ENSG00000154059 | 732.6211002 | 807.7513459 | -0.141135512 | 0.560052822 | 0.673894607 | IMPACT     |
| ENSG00000099904 | 1613.586196 | 1486.776041 | 0.118040196  | 0.560112817 | 0.673935585 | ZDHHC8     |
| ENSG00000237719 | 0.894837599 | 2.169915658 | -1.270802551 | 0.560220251 | 0.674006109 | Z95152.1   |
| ENSG00000253553 | 4.457819289 | 7.042203135 | -0.658818273 | 0.560223314 | 0.674006109 | AC090578.1 |
| ENSG00000278599 | 5.976961859 | 3.362259022 | 0.843477284  | 0.560299144 | 0.674066126 | TBC1D3E    |
| ENSG00000259657 | 5.976961859 | 3.270214277 | 0.87484329   | 0.560363058 | 0.674111803 | PIGHP1     |
| ENSG00000164849 | 27.27078591 | 18.70725989 | 0.549774426  | 0.560393261 | 0.674116924 | GPR146     |
| ENSG00000258952 | 3.390661292 | 6.083544062 | -0.848298277 | 0.560443504 | 0.674146149 | SALRNA1    |
| novel.743       | 45.84961016 | 62.78284556 | -0.453376807 | 0.560538213 | 0.674228858 | -          |
| ENSG00000207181 | 1.50778846  | 2.864080462 | -0.924405143 | 0.560643353 | 0.674324103 | SNORA14B   |
| ENSG00000273174 | 3.652418379 | 2.180528143 | 0.748979183  | 0.560680322 | 0.674337351 | AC108673.2 |
| ENSG00000275017 | 0.293240848 | 1.110911105 | -1.763627161 | 0.560796678 | 1           | AL353748.2 |
| ENSG00000202417 | 0.293240848 | 1.110911105 | -1.763627161 | 0.560796678 | 1           | RF00019    |
| ENSG00000239868 | 0.293240848 | 1.110911105 | -1.763627161 | 0.560796678 | 1           | RN7SL34P   |



|                 |             |             |              |             |             |             |
|-----------------|-------------|-------------|--------------|-------------|-------------|-------------|
| ENSG00000197588 | 0.293240848 | 1.110911105 | -1.763627161 | 0.560796678 | 1           | KLKP1       |
| ENSG00000265112 | 1.218308559 | 2.506385574 | -1.044419849 | 0.56083867  | 0.674496573 | MIR3153     |
| ENSG00000277723 | 0.616711807 | 1.783850939 | -1.540219972 | 0.560849789 | 1           | MIR6827     |
| ENSG00000110172 | 116.8219435 | 86.89528145 | 0.426740361  | 0.5611277   | 0.674812941 | CHORDC1     |
| ENSG00000248677 | 5.128723077 | 3.342189926 | 0.636007648  | 0.561218671 | 0.674891103 | LINC02102   |
| ENSG00000124380 | 524.6028943 | 478.5182363 | 0.132012181  | 0.561361183 | 0.675031237 | SNRNP27     |
| ENSG00000136247 | 468.739075  | 514.8895486 | -0.13558722  | 0.561532006 | 0.675187593 | ZDHHC4      |
| ENSG00000213061 | 2.402626059 | 1.069617038 | 1.165213845  | 0.561543185 | 0.675187593 | PFN1P11     |
| ENSG00000250069 | 1.828752122 | 0.723690511 | 1.340616141  | 0.561650859 | 1           | AC011379.1  |
| ENSG00000268516 | 64.63944753 | 74.51576804 | -0.203892942 | 0.561810429 | 0.67547766  | AC020915.3  |
| ENSG00000143379 | 417.9530931 | 464.8390991 | -0.153039729 | 0.561947404 | 0.675586004 | SETDB1      |
| ENSG00000171044 | 13.67457661 | 10.03718226 | 0.457087051  | 0.56195779  | 0.675586004 | XKR6        |
| novel.523       | 6.510505222 | 10.29234832 | -0.65789813  | 0.56197855  | 0.675586004 | -           |
| ENSG00000251400 | 4.514518568 | 6.45069556  | -0.512686356 | 0.562303675 | 0.675945579 | ALDH7A1P1   |
| ENSG00000107758 | 1508.763538 | 1398.423584 | 0.109491357  | 0.56256207  | 0.676224907 | PPP3CB      |
| ENSG00000169856 | 0.308355904 | 1.10029862  | -1.752511597 | 0.562623877 | 1           | ONECUT1     |
| ENSG00000287751 | 0.308355904 | 1.10029862  | -1.752511597 | 0.562623877 | 1           | AC015818.10 |
| ENSG00000274034 | 0.308355904 | 1.10029862  | -1.752511597 | 0.562623877 | 1           | MIR6813     |
| ENSG00000266075 | 0.308355904 | 1.10029862  | -1.752511597 | 0.562623877 | 1           | RN7SL574P   |
| ENSG00000283765 | 0.308355904 | 1.10029862  | -1.752511597 | 0.562623877 | 1           | AC131160.1  |
| ENSG00000248964 | 0.308355904 | 1.10029862  | -1.752511597 | 0.562623877 | 1           | AC131254.1  |
| ENSG00000252474 | 0.308355904 | 1.10029862  | -1.752511597 | 0.562623877 | 1           | RNU6-539P   |
| ENSG00000216179 | 0.308355904 | 1.10029862  | -1.752511597 | 0.562623877 | 1           | MIR541      |
| ENSG00000152763 | 77.79315981 | 66.72659446 | 0.220021149  | 0.562645508 | 0.676293914 | WDR78       |
| ENSG00000229525 | 0.307102255 | 1.10029862  | -1.752514022 | 0.562714339 | 1           | AC053503.2  |
| ENSG00000279422 | 0.307102255 | 1.10029862  | -1.752514022 | 0.562714339 | 1           | AC231657.1  |
| ENSG00000228879 | 2.694613258 | 1.00940975  | 1.396148153  | 0.562785524 | 0.676430917 | AL591848.1  |
| ENSG00000160803 | 1108.062478 | 1001.824833 | 0.145356913  | 0.562914018 | 0.676554059 | UBQLN4      |
| ENSG00000224895 | 2.108131562 | 0.774441189 | 1.475423173  | 0.56295768  | 0.676575237 | VPS26BP1    |
| ENSG00000265142 | 1.789675198 | 0.743759607 | 1.288492448  | 0.56302342  | 1           | MIR133A1HG  |
| ENSG00000202474 | 2.361041837 | 5.015082899 | -1.081514896 | 0.563258987 | 0.676896807 | RNA5SP283   |
| ENSG00000207445 | 2.683259148 | 4.371668772 | -0.691886741 | 0.563277355 | 0.676896807 | SNORD15B    |
| ENSG00000242970 | 0.308355904 | 1.426156051 | -2.132622224 | 0.563326945 | 1           | AC068522.1  |
| ENSG00000260165 | 0.308355904 | 1.426156051 | -2.132622224 | 0.563326945 | 1           | AC105036.2  |
| ENSG00000233994 | 0.308355904 | 1.426156051 | -2.132622224 | 0.563326945 | 1           | GDI2P2      |
| ENSG00000286232 | 0.308355904 | 1.426156051 | -2.132622224 | 0.563326945 | 1           | AL365229.1  |
| ENSG00000287380 | 0.308355904 | 1.426156051 | -2.132622224 | 0.563326945 | 1           | AL589935.3  |
| ENSG00000204532 | 0.308355904 | 1.426156051 | -2.132622224 | 0.563326945 | 1           | ZSCAN5C     |
| ENSG00000287960 | 3.648657432 | 2.058957692 | 0.801834613  | 0.563420749 | 0.67703781  | AC008567.3  |
| ENSG00000236349 | 5.420710276 | 3.607840069 | 0.592176538  | 0.563524217 | 0.677130824 | SUCLG2P2    |
| ENSG00000200170 | 0.293240848 | 1.10029862  | -1.75254091  | 0.563719835 | 1           | RF00019     |
| ENSG00000259545 | 0.293240848 | 1.10029862  | -1.75254091  | 0.563719835 | 1           | AC013452.1  |
| ENSG00000228110 | 0.293240848 | 1.10029862  | -1.75254091  | 0.563719835 | 1           | ST13P19     |
| ENSG00000215572 | 0.293240848 | 1.10029862  | -1.75254091  | 0.563719835 | 1           | ESRRAP1     |
| ENSG00000120158 | 236.2499602 | 206.406136  | 0.193633654  | 0.563882581 | 0.677530099 | RCL1        |
| ENSG00000271524 | 1.186824798 | 2.42610919  | -1.032949689 | 0.563989381 | 0.677627085 | BNIP3P17    |
| ENSG00000224621 | 2.987854105 | 1.386017859 | 1.096301834  | 0.564018266 | 0.677630454 | AL451042.1  |
| ENSG00000275343 | 2.387511003 | 1.049547942 | 1.176673108  | 0.56411525  | 0.677715635 | AC010999.1  |
| ENSG00000282988 | 1.536764924 | 2.934900236 | -0.933070703 | 0.564257781 | 0.677855523 | AL031777.3  |
| ENSG00000287489 | 0.293240848 | 1.426156051 | -2.132616024 | 0.564324543 | 1           | AC004549.1  |
| ENSG00000205037 | 0.293240848 | 1.426156051 | -2.132616024 | 0.564324543 | 1           | AC134312.1  |

|                 |             |             |              |             |             |             |
|-----------------|-------------|-------------|--------------|-------------|-------------|-------------|
| ENSG00000261024 | 0.293240848 | 1.426156051 | -2.132616024 | 0.564324543 | 1           | AL078644.1  |
| ENSG00000254672 | 0.293240848 | 1.426156051 | -2.132616024 | 0.564324543 | 1           | AL136146.1  |
| ENSG00000189114 | 218.5440052 | 194.4602275 | 0.168498505  | 0.564505387 | 0.678121623 | BLOC1S3     |
| ENSG00000198727 | 49454.98755 | 44588.57989 | 0.149442675  | 0.564544406 | 0.67813714  | MT-CYB      |
| ENSG00000231831 | 0.894837599 | 2.058957692 | -1.207719306 | 0.564674462 | 0.678260635 | MTHFD1P1    |
| ENSG00000196196 | 70.43240671 | 91.60876682 | -0.381114671 | 0.564723627 | 0.678260635 | HRCT1       |
| ENSG00000237499 | 28.86453485 | 23.37654466 | 0.308925543  | 0.564725532 | 0.678260635 | AL357060.1  |
| ENSG00000135250 | 571.9284809 | 640.1350063 | -0.162785067 | 0.564825709 | 0.678349593 | SRPK2       |
| ENSG00000205105 | 6.686871301 | 4.606637334 | 0.529733185  | 0.564859936 | 0.678359341 | COX17P1     |
| ENSG00000273080 | 8.241258578 | 11.5378825  | -0.494580953 | 0.565097096 | 0.678612788 | AC009309.1  |
| ENSG00000279405 | 3.254625787 | 1.773238453 | 0.876367823  | 0.565123838 | 0.678613534 | AC004696.2  |
| ENSG00000100030 | 2603.026145 | 2798.657124 | -0.104564632 | 0.565283473 | 0.678749803 | MAPK1       |
| ENSG00000265008 | 3.691495303 | 1.702418679 | 1.097101874  | 0.565289567 | 0.678749803 | AC011825.4  |
| ENSG00000201581 | 2.094270155 | 0.774441189 | 1.466877865  | 0.56531964  | 0.678754543 | RN7SKP78    |
| ENSG00000165246 | 133.7025801 | 44.86025383 | 1.575167602  | 0.565370746 | 0.678784535 | NLGN4Y      |
| ENSG00000134419 | 2204.838467 | 2468.760268 | -0.163149511 | 0.565406962 | 0.678796649 | RPS15A      |
| ENSG00000231329 | 3.594465451 | 1.426156051 | 1.332251769  | 0.565485527 | 0.678859601 | AL031772.1  |
| ENSG00000256862 | 1.230916317 | 0.356539013 | 1.668547473  | 0.56548741  | 1           | AC005842.1  |
| ENSG00000166856 | 1.230916317 | 0.356539013 | 1.668547473  | 0.56548741  | 1           | GPR182      |
| ENSG00000284116 | 1.230916317 | 0.356539013 | 1.668547473  | 0.56548741  | 1           | AL772307.1  |
| ENSG00000107831 | 1.230916317 | 0.356539013 | 1.668547473  | 0.56548741  | 1           | FGF8        |
| ENSG00000241350 | 1.230916317 | 0.356539013 | 1.668547473  | 0.56548741  | 1           | PMS2P11     |
| ENSG00000113838 | 207.7435285 | 186.1531102 | 0.156990283  | 0.565547527 | 0.678902662 | TBCCD1      |
| ENSG00000139722 | 678.9515186 | 602.8076988 | 0.171993805  | 0.565798641 | 0.679172726 | VPS37B      |
| ENSG00000250979 | 3.361684828 | 1.518200796 | 1.163582628  | 0.566015904 | 0.679402134 | AC022905.1  |
| ENSG00000170381 | 5.225752929 | 2.822786395 | 0.880729869  | 0.566218618 | 0.679614059 | SEMA3E      |
| ENSG00000261529 | 1.830005771 | 0.774441189 | 1.277570051  | 0.566223085 | 1           | AC100774.1  |
| ENSG00000105514 | 152.4408329 | 196.7889324 | -0.367421213 | 0.566336101 | 0.67969832  | RAB3D       |
| ENSG00000228350 | 3.867576648 | 6.379875787 | -0.71986607  | 0.566341143 | 0.67969832  | LINC02585   |
| ENSG00000253047 | 5.627021733 | 2.751966622 | 1.024066117  | 0.566374693 | 0.679699746 | RF00561     |
| ENSG00000280195 | 20.8169087  | 25.60209128 | -0.300201966 | 0.566394654 | 0.679699746 | AC245140.2  |
| ENSG00000104826 | 2.739958426 | 4.239485835 | -0.639456467 | 0.566518804 | 0.679817332 | LHB         |
| ENSG00000266010 | 9.864881621 | 16.91767676 | -0.779680147 | 0.56654601  | 0.67981858  | GATA6-AS1   |
| ENSG00000224916 | 1.230916317 | 0.336469917 | 1.668570785  | 0.566779697 | 1           | APOC4-APOC2 |
| ENSG00000255647 | 1.230916317 | 0.336469917 | 1.668570785  | 0.566779697 | 1           | AC093510.1  |
| ENSG00000108759 | 1.230916317 | 0.336469917 | 1.668570785  | 0.566779697 | 1           | KRT32       |
| ENSG00000270878 | 2.709728314 | 4.361056287 | -0.67959581  | 0.566819495 | 0.680115332 | AL136038.4  |
| ENSG00000255857 | 56.01690761 | 46.62707094 | 0.263773159  | 0.566864362 | 0.680137757 | PXN-AS1     |
| ENSG00000115446 | 766.9228714 | 713.213377  | 0.104546651  | 0.566890833 | 0.680138108 | UNC50       |
| ENSG00000103653 | 1637.145853 | 1482.200985 | 0.143451045  | 0.566972668 | 0.68020488  | CSK         |
| ENSG00000271714 | 2.763920295 | 0.774441189 | 1.853516974  | 0.567117855 | 0.680347647 | AC010501.1  |
| ENSG00000238058 | 34.8540332  | 29.00577277 | 0.25964333   | 0.567300304 | 0.680535101 | AL355574.1  |
| ENSG00000143970 | 651.211423  | 595.5047595 | 0.129069285  | 0.567415663 | 0.680642058 | ASXL2       |
| ENSG00000083635 | 156.5356339 | 174.9399293 | -0.161807459 | 0.567549904 | 0.68075664  | NUFIP1      |
| ENSG00000258520 | 3.296210009 | 1.783850939 | 0.88615331   | 0.567563588 | 0.68075664  | AL359317.1  |
| ENSG00000198355 | 845.0720974 | 948.1941776 | -0.165745281 | 0.567632502 | 0.680777557 | PIM3        |
| ENSG00000010072 | 210.1422511 | 230.5239529 | -0.134551681 | 0.567633433 | 0.680777557 | SPRTN       |
| ENSG00000223571 | 4.20992361  | 2.272572888 | 0.909937184  | 0.567811076 | 0.680959175 | DHRX-IT1    |
| ENSG00000106052 | 1431.980108 | 1539.077731 | -0.104065089 | 0.567872489 | 0.680984028 | TAX1BP1     |
| ENSG00000275894 | 7.415443282 | 4.555886656 | 0.699099358  | 0.567899202 | 0.680984028 | AL021578.1  |
| ENSG00000177058 | 241.7502205 | 221.7516848 | 0.125274995  | 0.567926991 | 0.680984028 | SLC38A9     |

|                 |             |             |              |             |             |            |
|-----------------|-------------|-------------|--------------|-------------|-------------|------------|
| ENSG00000235910 | 7.924127133 | 13.06181549 | -0.717898943 | 0.567936643 | 0.680984028 | APOA1-AS   |
| ENSG00000125733 | 1832.846611 | 2027.246499 | -0.145254816 | 0.568173513 | 0.681236608 | TRIP10     |
| ENSG00000271153 | 1.835020366 | 0.743759607 | 1.317808618  | 0.568196755 | 1           | RPL23AP88  |
| ENSG00000231305 | 18.26438573 | 14.05359629 | 0.382043611  | 0.568312208 | 0.681369705 | AC112484.1 |
| ENSG00000260007 | 21.85168529 | 28.50027377 | -0.380666255 | 0.568336972 | 0.681369705 | AC107871.1 |
| ENSG00000230769 | 0.586481695 | 1.733100261 | -1.557282632 | 0.568454138 | 1           | Z98048.1   |
| ENSG00000174827 | 17.60379586 | 12.65940609 | 0.470410664  | 0.56867394  | 0.681742231 | PDZK1      |
| ENSG00000199023 | 6.381022695 | 4.250098321 | 0.579233519  | 0.568772503 | 0.681828931 | MIR339     |
| ENSG00000170298 | 0.616711807 | 1.742556871 | -1.511518385 | 0.568776511 | 1           | LGALS9B    |
| ENSG00000285287 | 1.21705491  | 2.395427609 | -0.99448385  | 0.568824684 | 0.681834837 | AL354855.1 |
| ENSG00000218018 | 16.63094696 | 12.29914267 | 0.446032399  | 0.568849044 | 0.681834837 | AL109955.1 |
| ENSG00000282978 | 6.709579521 | 9.415121503 | -0.488699119 | 0.568856162 | 0.681834837 | AC110994.2 |
| ENSG00000106333 | 3249.440295 | 4555.437051 | -0.487414674 | 0.568935405 | 0.68189836  | PCOLCE     |
| ENSG00000260316 | 2.430348874 | 4.462557642 | -0.870222861 | 0.568981293 | 0.681921902 | AL008727.1 |
| ENSG00000123684 | 950.1883689 | 877.8259568 | 0.113992262  | 0.569013926 | 0.681929555 | LPGAT1     |
| ENSG00000134330 | 839.1404536 | 763.6554822 | 0.13630013   | 0.569088909 | 0.681987958 | IAH1       |
| ENSG00000284196 | 3.282348601 | 1.548882377 | 1.111838961  | 0.56911781  | 0.681991136 | AL158064.1 |
| ENSG00000271396 | 4.524619029 | 2.406040094 | 0.897376297  | 0.569292696 | 0.682169244 | AC091167.4 |
| ENSG00000237842 | 2.9928687   | 5.135497475 | -0.770207878 | 0.569330669 | 0.682183283 | AL157713.1 |
| ENSG00000163746 | 2.111892509 | 1.049547942 | 0.994111739  | 0.569453018 | 0.682298417 | PLSCR2     |
| ENSG00000221044 | 2.66939774  | 4.82025253  | -0.839368012 | 0.569909507 | 0.682806576 | RF00012    |
| ENSG00000167720 | 136.3150939 | 153.055994  | -0.166228739 | 0.569929695 | 0.682806576 | SRR        |
| ENSG00000207752 | 3.078544442 | 5.422372589 | -0.819545117 | 0.570249366 | 0.68315532  | MIR199A1   |
| ENSG00000128617 | 15.6672296  | 8.744621814 | 0.837578373  | 0.570273376 | 0.68315532  | OPN1SW     |
| ENSG00000160959 | 516.7594008 | 565.9090806 | -0.131235143 | 0.570350573 | 0.683216296 | LRRC14     |
| ENSG00000185008 | 0.925067711 | 2.455634897 | -1.417568369 | 0.570470754 | 0.683328754 | ROBO2      |
| ENSG00000261195 | 1.232169966 | 0.387220594 | 1.66992109   | 0.570650732 | 1           | AC027130.1 |
| ENSG00000286893 | 1.232169966 | 0.387220594 | 1.66992109   | 0.570650732 | 1           | AC015660.5 |
| ENSG00000243319 | 1.232169966 | 0.387220594 | 1.66992109   | 0.570650732 | 1           | FGF14-IT1  |
| ENSG00000233111 | 1.232169966 | 0.387220594 | 1.66992109   | 0.570650732 | 1           | RAB1C      |
| ENSG00000106178 | 1.232169966 | 0.387220594 | 1.66992109   | 0.570650732 | 1           | CCL24      |
| ENSG00000173193 | 1792.252336 | 1619.745667 | 0.146031246  | 0.570684987 | 0.683553854 | PARP14     |
| ENSG00000256092 | 25.10115394 | 30.27595237 | -0.268766333 | 0.570899111 | 0.683778803 | AC137767.1 |
| ENSG00000172361 | 16.96953297 | 13.68644479 | 0.311658367  | 0.570934765 | 0.683789984 | CFAP53     |
| ENSG00000261787 | 1.203193503 | 0.387220594 | 1.640092026  | 0.571004914 | 1           | TCF24      |
| ENSG00000265828 | 1.203193503 | 0.387220594 | 1.640092026  | 0.571004914 | 1           | MIR3939    |
| ENSG00000249241 | 1.203193503 | 0.387220594 | 1.640092026  | 0.571004914 | 1           | LINC02265  |
| ENSG00000131495 | 667.0954911 | 611.0391288 | 0.126680211  | 0.571019968 | 0.683860504 | NDUFA2     |
| ENSG00000169499 | 933.0041436 | 1090.2169   | -0.224855485 | 0.571183016 | 0.684024242 | PLEKHA2    |
| ENSG00000063660 | 3694.174842 | 3122.504822 | 0.242486579  | 0.571282984 | 0.684112427 | GPC1       |
| ENSG00000144935 | 453.1855443 | 402.7315055 | 0.170941269  | 0.571309463 | 0.684112603 | TRPC1      |
| ENSG00000255002 | 1.229662669 | 0.387220594 | 1.66737068   | 0.57131248  | 1           | LINC02324  |
| ENSG00000164953 | 238.4005737 | 214.9750034 | 0.150149007  | 0.571353274 | 0.684133534 | TMEM67     |
| ENSG00000164304 | 3.663772488 | 2.058957692 | 0.807884439  | 0.571389634 | 0.684145541 | CAGE1      |
| ENSG00000255850 | 0.61420451  | 1.722487775 | -1.501306247 | 0.571675727 | 1           | RXYLT1-AS1 |
| ENSG00000267927 | 1.200686205 | 0.387220594 | 1.63751802   | 0.571683509 | 1           | AC010320.1 |
| ENSG00000279074 | 1.200686205 | 0.387220594 | 1.63751802   | 0.571683509 | 1           | AC007998.5 |
| ENSG00000287260 | 7.5603256   | 5.22882649  | 0.518944191  | 0.571736048 | 0.684528767 | AL357075.4 |
| ENSG00000091039 | 1435.60389  | 1298.4203   | 0.144890918  | 0.571859265 | 0.684644743 | OSBPL8     |
| ENSG00000231449 | 2.123246619 | 1.049547942 | 1.000503836  | 0.571903934 | 0.684666672 | AC097359.1 |
| ENSG00000261505 | 70.34913951 | 86.69920084 | -0.299519471 | 0.572263475 | 0.685065537 | AL031714.1 |

|                 |             |             |              |             |             |              |
|-----------------|-------------|-------------|--------------|-------------|-------------|--------------|
| ENSG00000237868 | 2.082916045 | 0.774441189 | 1.459069577  | 0.572399839 | 0.685197209 | AC097533.1   |
| ENSG00000170364 | 182.6023718 | 158.3186314 | 0.204744364  | 0.572506545 | 0.685293368 | SETMAR       |
| ENSG00000286025 | 1.232169966 | 0.356539013 | 1.669955972  | 0.5725199   | 1           | AC000095.3   |
| ENSG00000271931 | 1.232169966 | 0.356539013 | 1.669955972  | 0.5725199   | 1           | AL353135.1   |
| novel.732       | 1.232169966 | 0.356539013 | 1.669955972  | 0.5725199   | 1           | -            |
| ENSG00000237853 | 1.232169966 | 0.356539013 | 1.669955972  | 0.5725199   | 1           | NFIA-AS1     |
| ENSG00000219604 | 1.232169966 | 0.356539013 | 1.669955972  | 0.5725199   | 1           | AL590143.1   |
| ENSG00000154845 | 1966.759282 | 1747.483833 | 0.170482015  | 0.572659378 | 0.68544473  | PPP4R1       |
| ENSG00000106351 | 357.7310912 | 415.5118182 | -0.216594832 | 0.572724795 | 0.68549145  | AGFG2        |
| ENSG00000237124 | 1.773306493 | 0.723690511 | 1.302873413  | 0.572869447 | 1           | MTND2P11     |
| ENSG00000128563 | 816.4104416 | 743.068217  | 0.136173203  | 0.572943594 | 0.68572174  | PRKRIP1      |
| ENSG00000214465 | 1.203193503 | 0.356539013 | 1.640077371  | 0.572981887 | 1           | SMARCE1P6    |
| ENSG00000230628 | 1.203193503 | 0.356539013 | 1.640077371  | 0.572981887 | 1           | AL160408.3   |
| ENSG00000186334 | 1.203193503 | 0.356539013 | 1.640077371  | 0.572981887 | 1           | SLC36A3      |
| ENSG00000246225 | 1.203193503 | 0.356539013 | 1.640077371  | 0.572981887 | 1           | AC006299.1   |
| ENSG00000287548 | 1.203193503 | 0.356539013 | 1.640077371  | 0.572981887 | 1           | AC021269.3   |
| ENSG00000256234 | 1.203193503 | 0.356539013 | 1.640077371  | 0.572981887 | 1           | AC022509.2   |
| ENSG00000243519 | 1.203193503 | 0.356539013 | 1.640077371  | 0.572981887 | 1           | IGLVIVOR22-2 |
| ENSG00000228502 | 6.381022695 | 9.122385798 | -0.523121869 | 0.573044108 | 0.685810446 | EEF1A1P11    |
| ENSG00000112079 | 874.8079888 | 1025.895216 | -0.230106047 | 0.573234639 | 0.685991856 | STK38        |
| ENSG00000118997 | 9.114712877 | 6.787165477 | 0.421506083  | 0.573248496 | 0.685991856 | DNAH7        |
| ENSG00000276952 | 19.26760729 | 14.86830407 | 0.37059659   | 0.573335351 | 0.686064193 | AL121772.3   |
| ENSG00000170759 | 3980.863228 | 4324.137628 | -0.11939765  | 0.573395901 | 0.686095632 | KIF5B        |
| ENSG00000254593 | 0.586481695 | 1.467450118 | -1.29960778  | 0.573409985 | 1           | OR7E126P     |
| ENSG00000232788 | 10.19573228 | 7.020849769 | 0.549169279  | 0.573414439 | 0.686095632 | ITGA6-AS1    |
| ENSG00000100142 | 1223.263819 | 1347.76998  | -0.139860743 | 0.573508141 | 0.686176146 | POLR2F       |
| ENSG00000257941 | 1.200686205 | 0.356539013 | 1.637498408  | 0.573663418 | 1           | AC011611.5   |
| ENSG00000056291 | 1.200686205 | 0.356539013 | 1.637498408  | 0.573663418 | 1           | NPFRR2       |
| ENSG00000225329 | 1.200686205 | 0.356539013 | 1.637498408  | 0.573663418 | 1           | LHFPL3-AS2   |
| ENSG00000233041 | 1.200686205 | 0.356539013 | 1.637498408  | 0.573663418 | 1           | PHGR1        |
| ENSG00000214659 | 3.914175465 | 2.51699806  | 0.640172476  | 0.573698981 | 0.686372869 | KRT8P26      |
| ENSG00000151303 | 1.232169966 | 0.336469917 | 1.669978975  | 0.573761636 | 1           | AL136982.1   |
| ENSG00000253908 | 1.232169966 | 0.336469917 | 1.669978975  | 0.573761636 | 1           | AC104115.2   |
| ENSG00000236304 | 17.29293266 | 10.96772829 | 0.649960036  | 0.573946098 | 0.6866369   | AP001189.1   |
| ENSG00000269915 | 1.509042109 | 0.693008929 | 1.099155293  | 0.574174823 | 1           | AP006621.4   |
| ENSG00000072832 | 631.5731761 | 797.4220199 | -0.336130741 | 0.574197148 | 0.686905613 | CRMP1        |
| ENSG00000259575 | 1.203193503 | 0.336469917 | 1.640067708  | 0.574295253 | 1           | AC012404.2   |
| ENSG00000280113 | 1.203193503 | 0.336469917 | 1.640067708  | 0.574295253 | 1           | AL357140.3   |
| ENSG00000203435 | 1.203193503 | 0.336469917 | 1.640067708  | 0.574295253 | 1           | E2F3P2       |
| ENSG00000198680 | 435.3679708 | 399.6502266 | 0.122935018  | 0.574305307 | 0.687001483 | TUSC1        |
| ENSG00000271151 | 7.533856434 | 5.359853551 | 0.490281091  | 0.574330173 | 0.687001483 | AC016737.1   |
| ENSG00000280167 | 1.218308559 | 0.387220594 | 1.655682789  | 0.574343052 | 1           | AP000943.4   |
| ENSG00000185332 | 1.218308559 | 0.387220594 | 1.655682789  | 0.574343052 | 1           | AC027601.1   |
| ENSG00000201699 | 1.218308559 | 0.387220594 | 1.655682789  | 0.574343052 | 1           | RNU1-59P     |
| ENSG00000070985 | 1.229662669 | 0.336469917 | 1.667421696  | 0.57442773  | 1           | TRPM5        |
| ENSG00000259532 | 1.229662669 | 0.336469917 | 1.667421696  | 0.57442773  | 1           | AC009269.2   |
| ENSG00000225243 | 1.229662669 | 0.336469917 | 1.667421696  | 0.57442773  | 1           | AL021026.1   |
| ENSG00000243562 | 0.586481695 | 1.702418679 | -1.535208108 | 0.574448239 | 1           | RN7SL838P    |
| ENSG00000283541 | 0.586481695 | 1.702418679 | -1.535208108 | 0.574448239 | 1           | BX005040.4   |
| ENSG00000236426 | 0.308355904 | 1.060160428 | -1.707055216 | 0.574451153 | 1           | AL583824.1   |
| ENSG00000274997 | 0.308355904 | 1.060160428 | -1.707055216 | 0.574451153 | 1           | HIST1H2AH    |

|                 |             |             |              |             |             |            |
|-----------------|-------------|-------------|--------------|-------------|-------------|------------|
| ENSG00000249193 | 0.308355904 | 1.060160428 | -1.707055216 | 0.574451153 | 1           | HSPD1P5    |
| ENSG00000255286 | 0.308355904 | 1.060160428 | -1.707055216 | 0.574451153 | 1           | AP000907.1 |
| ENSG00000205822 | 0.308355904 | 1.060160428 | -1.707055216 | 0.574451153 | 1           | TPTE2P6    |
| ENSG00000278655 | 0.308355904 | 1.060160428 | -1.707055216 | 0.574451153 | 1           | AP000346.4 |
| ENSG00000255164 | 0.307102255 | 1.060160428 | -1.707053407 | 0.574544043 | 1           | AF235103.1 |
| ENSG00000214881 | 0.307102255 | 1.060160428 | -1.707053407 | 0.574544043 | 1           | TMEM14DP   |
| ENSG00000253772 | 0.307102255 | 1.060160428 | -1.707053407 | 0.574544043 | 1           | AC112191.1 |
| ENSG00000231184 | 0.307102255 | 1.060160428 | -1.707053407 | 0.574544043 | 1           | CCNQP3     |
| ENSG00000261692 | 0.307102255 | 1.060160428 | -1.707053407 | 0.574544043 | 1           | AC092120.1 |
| ENSG00000167131 | 0.307102255 | 1.060160428 | -1.707053407 | 0.574544043 | 1           | CCDC103    |
| ENSG00000246273 | 44.31241796 | 51.63025708 | -0.221338965 | 0.574577409 | 0.687246497 | SBF2-AS1   |
| ENSG00000120437 | 399.7159602 | 458.4221801 | -0.198130566 | 0.574587907 | 0.687246497 | ACAT2      |
| ENSG00000147223 | 0.600343103 | 1.487519214 | -1.294024853 | 0.574814781 | 1           | RIPPLY1    |
| ENSG00000259287 | 11.95768466 | 8.398695287 | 0.504486634  | 0.574861714 | 0.687528145 | AC010809.1 |
| ENSG00000143315 | 290.8086837 | 252.3336479 | 0.203603339  | 0.57487631  | 0.687528145 | PIGM       |
| ENSG00000080224 | 1.200686205 | 0.336469917 | 1.637485475  | 0.574978747 | 1           | EPHA6      |
| ENSG00000236444 | 1.200686205 | 0.336469917 | 1.637485475  | 0.574978747 | 1           | UBE2L5     |
| ENSG00000279393 | 1.200686205 | 0.336469917 | 1.637485475  | 0.574978747 | 1           | AL139005.1 |
| ENSG00000198663 | 1885.830315 | 2027.845002 | -0.104699632 | 0.575117931 | 0.687785453 | C6orf89    |
| ENSG00000273249 | 3.636049674 | 2.099095884 | 0.779353292  | 0.57524197  | 0.687902127 | BX649632.1 |
| ENSG00000186907 | 22.93152197 | 32.40418878 | -0.496646889 | 0.575298524 | 0.687910921 | RTN4RL2    |
| ENSG00000180015 | 24.27716176 | 33.96894911 | -0.48726935  | 0.575302278 | 0.687910921 | AC093909.1 |
| ENSG00000256356 | 0.601596751 | 1.487519214 | -1.292123672 | 0.575369491 | 1           | HSPA8P5    |
| ENSG00000267138 | 0.601596751 | 1.487519214 | -1.292123672 | 0.575369491 | 1           | AC005954.2 |
| ENSG00000201208 | 0.601596751 | 1.487519214 | -1.292123672 | 0.575369491 | 1           | RF00019    |
| ENSG00000234473 | 0.293240848 | 1.060160428 | -1.707033351 | 0.575576597 | 1           | ZNF101P2   |
| ENSG00000229896 | 0.293240848 | 1.060160428 | -1.707033351 | 0.575576597 | 1           | AL157373.2 |
| ENSG00000151461 | 855.4502082 | 782.0377359 | 0.129386412  | 0.575583184 | 0.688215137 | UPF2       |
| ENSG00000160233 | 231.4322432 | 266.037966  | -0.200031645 | 0.575679506 | 0.688298631 | LRRC3      |
| ENSG00000287851 | 2.415233817 | 1.10029862  | 1.14367912   | 0.575737242 | 0.688321719 | AP001885.2 |
| ENSG00000119638 | 2166.242113 | 2323.279206 | -0.100897829 | 0.575751803 | 0.688321719 | NEK9       |
| ENSG00000149929 | 548.047589  | 495.8147517 | 0.144160851  | 0.575874569 | 0.688436809 | HIRIP3     |
| ENSG00000200120 | 0.616711807 | 1.762625967 | -1.525321793 | 0.57592488  | 1           | RF00019    |
| ENSG00000185485 | 587.7616795 | 652.6037391 | -0.150903993 | 0.575938519 | 0.68848158  | SDHAP1     |
| ENSG00000118007 | 453.5844762 | 501.0357779 | -0.143866325 | 0.575998977 | 0.688521261 | STAG1      |
| ENSG00000118162 | 153.725799  | 171.375695  | -0.15761225  | 0.576024716 | 0.688521261 | KPTN       |
| ENSG00000243176 | 34.16425341 | 28.25255655 | 0.269325887  | 0.576075244 | 0.68854998  | AC092944.1 |
| ENSG00000253295 | 1.218308559 | 0.356539013 | 1.655695169  | 0.576226465 | 1           | AC022217.2 |
| ENSG00000228044 | 1.218308559 | 0.356539013 | 1.655695169  | 0.576226465 | 1           | AL160408.1 |
| ENSG00000204113 | 0.600343103 | 1.782695063 | -1.568745424 | 0.576258921 | 1           | BMP2KL     |
| ENSG00000073169 | 673.8615446 | 744.6573656 | -0.143894276 | 0.576262657 | 0.688731133 | SELENOO    |
| ENSG00000005801 | 423.6403894 | 380.5774847 | 0.154012057  | 0.576353776 | 0.688731133 | ZNF195     |
| novel.1103      | 5.703850663 | 8.55911966  | -0.574228743 | 0.57636676  | 0.688731133 | -          |
| ENSG00000287166 | 2.142122621 | 4.077777192 | -0.942507979 | 0.57639322  | 0.688731133 | AC104561.4 |
| ENSG00000156313 | 257.3028136 | 217.6774565 | 0.241929045  | 0.576399449 | 0.688731133 | RPGR       |
| ENSG00000155367 | 28.22511482 | 34.90124613 | -0.301832829 | 0.576426304 | 0.688731133 | PPM1J      |
| ENSG00000181378 | 2.695866906 | 1.406086955 | 0.930847428  | 0.576438878 | 0.688731133 | CFAP65     |
| ENSG00000269535 | 2.695866906 | 1.406086955 | 0.930847428  | 0.576438878 | 0.688731133 | AC010320.4 |
| ENSG00000275552 | 3.340301529 | 5.584209627 | -0.748810365 | 0.576483557 | 0.68875207  | AC243965.2 |
| ENSG00000223960 | 511.7475956 | 568.71384   | -0.151767214 | 0.576509421 | 0.68875207  | PRKRA-AS1  |
| ENSG00000159784 | 97.47696463 | 75.11557635 | 0.375522757  | 0.57658271  | 0.688796762 | FAM131B    |

|                 |             |             |              |             |             |            |
|-----------------|-------------|-------------|--------------|-------------|-------------|------------|
| ENSG00000145020 | 9.049166786 | 6.53212782  | 0.476084275  | 0.576599853 | 0.688796762 | AMT        |
| ENSG00000115109 | 310.0145058 | 339.3798372 | -0.13012281  | 0.576737524 | 0.688929546 | EPB41L5    |
| ENSG00000264349 | 1.789675198 | 3.230076085 | -0.845940904 | 0.57689802  | 0.68908958  | MIR4258    |
| novel.12        | 2.741212075 | 5.067117846 | -0.898210709 | 0.577015684 | 0.68919844  | -          |
| ENSG00000255507 | 1.214547612 | 0.356539013 | 1.651831797  | 0.577233281 | 1           | UVRAG-DT   |
| ENSG00000233851 | 1.214547612 | 0.356539013 | 1.651831797  | 0.577233281 | 1           | LATS2-AS1  |
| ENSG00000282897 | 1.214547612 | 0.356539013 | 1.651831797  | 0.577233281 | 1           | AL162727.3 |
| ENSG00000276047 | 1.214547612 | 0.356539013 | 1.651831797  | 0.577233281 | 1           | RN7SL711P  |
| ENSG00000236254 | 1.214547612 | 0.356539013 | 1.651831797  | 0.577233281 | 1           | MTND4P14   |
| ENSG00000198886 | 81332.84543 | 91461.73349 | -0.169330806 | 0.577242302 | 0.689437422 | MT-ND4     |
| ENSG00000186009 | 0.308355904 | 1.049547942 | -1.695663774 | 0.577474291 | 1           | ATP4B      |
| ENSG00000272371 | 0.308355904 | 1.049547942 | -1.695663774 | 0.577474291 | 1           | AL591167.1 |
| ENSG00000224891 | 0.308355904 | 1.049547942 | -1.695663774 | 0.577474291 | 1           | AC007899.1 |
| ENSG00000278418 | 0.308355904 | 1.049547942 | -1.695663774 | 0.577474291 | 1           | MIR6512    |
| ENSG00000178804 | 0.308355904 | 1.049547942 | -1.695663774 | 0.577474291 | 1           | H1FOO      |
| ENSG00000255186 | 0.308355904 | 1.049547942 | -1.695663774 | 0.577474291 | 1           | AC087277.2 |
| ENSG00000160714 | 1191.939585 | 1288.917527 | -0.112894955 | 0.577554408 | 0.68974731  | UBE2Q1     |
| ENSG00000234106 | 0.307102255 | 1.049547942 | -1.69566039  | 0.577567932 | 1           | SRP14P2    |
| ENSG00000277901 | 0.307102255 | 1.049547942 | -1.69566039  | 0.577567932 | 1           | AL390037.1 |
| ENSG00000204956 | 8.206013871 | 10.94509066 | -0.410849499 | 0.577574009 | 0.68974731  | PCDHGA1    |
| ENSG00000267904 | 43.418478   | 37.11386852 | 0.228680028  | 0.577581405 | 0.68974731  | AC024075.1 |
| ENSG00000134255 | 461.5030468 | 426.8099205 | 0.113157735  | 0.577649546 | 0.689796979 | CEPT1      |
| ENSG00000258524 | 1.200686205 | 2.609042805 | -1.107917754 | 0.577919166 | 0.690075318 | NT5CP1     |
| ENSG00000164151 | 1000.193813 | 897.0851209 | 0.157096611  | 0.577935755 | 0.690075318 | ICE1       |
| ENSG00000279699 | 2.726097019 | 1.518200796 | 0.873798348  | 0.578003835 | 0.690097935 | AC004264.2 |
| ENSG00000214866 | 19.03127918 | 13.25664586 | 0.524716841  | 0.57800782  | 0.690097935 | DCDC2C     |
| ENSG00000129197 | 482.9837802 | 431.9980141 | 0.161479211  | 0.578156326 | 0.690243522 | RPAIN      |
| novel.535       | 48.14034821 | 37.29898549 | 0.371630493  | 0.578278755 | 0.690357962 | -          |
| ENSG00000230092 | 4.83548223  | 3.271370153 | 0.571939708  | 0.578397485 | 0.690467977 | AL669831.4 |
| ENSG00000253819 | 0.925067711 | 0           | 2.219027328  | 0.578411265 | 1           | LINC01151  |
| ENSG00000226197 | 0.925067711 | 0           | 2.219027328  | 0.578411265 | 1           | AL583785.1 |
| ENSG00000148704 | 0.925067711 | 0           | 2.219027328  | 0.578411265 | 1           | VAX1       |
| ENSG00000256008 | 0.925067711 | 0           | 2.219027328  | 0.578411265 | 1           | AC125616.1 |
| ENSG00000228078 | 0.925067711 | 0           | 2.219027328  | 0.578411265 | 1           | HLA-U      |
| ENSG00000145384 | 0.925067711 | 0           | 2.219027328  | 0.578411265 | 1           | FABP2      |
| ENSG00000253793 | 0.925067711 | 0           | 2.219027328  | 0.578411265 | 1           | AC008066.1 |
| ENSG00000279047 | 0.925067711 | 0           | 2.219027328  | 0.578411265 | 1           | AC244517.5 |
| ENSG00000230225 | 0.925067711 | 0           | 2.219027328  | 0.578411265 | 1           | MTND5P14   |
| ENSG00000257530 | 0.925067711 | 0           | 2.219027328  | 0.578411265 | 1           | AC048344.1 |
| ENSG00000207357 | 0.925067711 | 0           | 2.219027328  | 0.578411265 | 1           | RNU6-2     |
| ENSG00000254481 | 0.925067711 | 0           | 2.219027328  | 0.578411265 | 1           | PTP4A2P2   |
| ENSG00000223500 | 0.925067711 | 0           | 2.219027328  | 0.578411265 | 1           | AC083862.1 |
| ENSG00000196431 | 0.925067711 | 0           | 2.219027328  | 0.578411265 | 1           | CRYBA4     |
| ENSG00000257114 | 0.925067711 | 0           | 2.219027328  | 0.578411265 | 1           | LINC02450  |
| ENSG00000255804 | 0.925067711 | 0           | 2.219027328  | 0.578411265 | 1           | OR6J1      |
| ENSG00000066813 | 0.925067711 | 0           | 2.219027328  | 0.578411265 | 1           | ACSM2B     |
| ENSG00000268316 | 0.925067711 | 0           | 2.219027328  | 0.578411265 | 1           | AC006272.1 |
| ENSG00000287197 | 0.925067711 | 0           | 2.219027328  | 0.578411265 | 1           | AC096675.1 |
| ENSG00000187833 | 0.925067711 | 0           | 2.219027328  | 0.578411265 | 1           | C2orf78    |
| ENSG00000273950 | 0.925067711 | 0           | 2.219027328  | 0.578411265 | 1           | RF00017    |
| ENSG00000207732 | 0.925067711 | 0           | 2.219027328  | 0.578411265 | 1           | MIR218-1   |

|                 |             |   |             |             |   |            |
|-----------------|-------------|---|-------------|-------------|---|------------|
| ENSG00000249781 | 0.925067711 | 0 | 2.219027328 | 0.578411265 | 1 | LINC02112  |
| ENSG00000232891 | 0.925067711 | 0 | 2.219027328 | 0.578411265 | 1 | AL450344.3 |
| ENSG00000285144 | 0.925067711 | 0 | 2.219027328 | 0.578411265 | 1 | AL359555.3 |
| ENSG00000280614 | 0.925067711 | 0 | 2.219027328 | 0.578411265 | 1 | FP236383.2 |
| ENSG00000188257 | 0.925067711 | 0 | 2.219027328 | 0.578411265 | 1 | PLA2G2A    |
| ENSG00000203397 | 0.925067711 | 0 | 2.219027328 | 0.578411265 | 1 | AL139400.1 |
| ENSG00000274428 | 0.925067711 | 0 | 2.219027328 | 0.578411265 | 1 | RF00003    |
| ENSG00000265882 | 0.925067711 | 0 | 2.219027328 | 0.578411265 | 1 | RN7SL73P   |
| ENSG00000237643 | 0.925067711 | 0 | 2.219027328 | 0.578411265 | 1 | AL365226.2 |
| ENSG00000284606 | 0.925067711 | 0 | 2.219027328 | 0.578411265 | 1 | AC105233.5 |
| ENSG00000223601 | 0.925067711 | 0 | 2.219027328 | 0.578411265 | 1 | EBLN1      |
| ENSG00000278518 | 0.925067711 | 0 | 2.219027328 | 0.578411265 | 1 | AL161645.1 |
| ENSG00000222179 | 0.925067711 | 0 | 2.219027328 | 0.578411265 | 1 | RN7SKP26   |
| ENSG00000237290 | 0.925067711 | 0 | 2.219027328 | 0.578411265 | 1 | LINC01343  |
| ENSG00000233540 | 0.925067711 | 0 | 2.219027328 | 0.578411265 | 1 | DNM3-IT1   |
| ENSG00000124003 | 0.925067711 | 0 | 2.219027328 | 0.578411265 | 1 | MOGAT1     |
| ENSG00000253138 | 0.925067711 | 0 | 2.219027328 | 0.578411265 | 1 | LINC00967  |
| ENSG00000256713 | 0.925067711 | 0 | 2.219027328 | 0.578411265 | 1 | PGA5       |
| ENSG00000272508 | 0.925067711 | 0 | 2.219027328 | 0.578411265 | 1 | AL136982.6 |
| ENSG00000270445 | 0.925067711 | 0 | 2.219027328 | 0.578411265 | 1 | AC145423.1 |
| ENSG00000207208 | 0.925067711 | 0 | 2.219027328 | 0.578411265 | 1 | RNU6-790P  |
| ENSG00000239118 | 0.925067711 | 0 | 2.219027328 | 0.578411265 | 1 | MIR1972-2  |
| ENSG00000250479 | 0.925067711 | 0 | 2.219027328 | 0.578411265 | 1 | CHCHD10    |
| ENSG00000280114 | 0.925067711 | 0 | 2.219027328 | 0.578411265 | 1 | AL021920.2 |
| ENSG00000238825 | 0.925067711 | 0 | 2.219027328 | 0.578411265 | 1 | RNU1-13P   |
| ENSG00000224160 | 0.925067711 | 0 | 2.219027328 | 0.578411265 | 1 | CICP10     |
| ENSG00000232375 | 0.925067711 | 0 | 2.219027328 | 0.578411265 | 1 | AC092042.2 |
| ENSG00000273238 | 0.925067711 | 0 | 2.219027328 | 0.578411265 | 1 | TMEM271    |
| ENSG00000251350 | 0.925067711 | 0 | 2.219027328 | 0.578411265 | 1 | LINC02475  |
| ENSG00000164458 | 0.925067711 | 0 | 2.219027328 | 0.578411265 | 1 | TBXT       |
| ENSG00000287823 | 0.925067711 | 0 | 2.219027328 | 0.578411265 | 1 | AL603783.1 |
| ENSG00000227863 | 0.925067711 | 0 | 2.219027328 | 0.578411265 | 1 | AC002383.1 |
| ENSG00000082556 | 0.925067711 | 0 | 2.219027328 | 0.578411265 | 1 | OPRK1      |
| ENSG00000253433 | 0.925067711 | 0 | 2.219027328 | 0.578411265 | 1 | AC083843.1 |
| ENSG00000230229 | 0.925067711 | 0 | 2.219027328 | 0.578411265 | 1 | AC010163.2 |
| ENSG00000273824 | 0.925067711 | 0 | 2.219027328 | 0.578411265 | 1 | AC008033.3 |
| ENSG00000256609 | 0.925067711 | 0 | 2.219027328 | 0.578411265 | 1 | AC084880.3 |
| ENSG00000256971 | 0.925067711 | 0 | 2.219027328 | 0.578411265 | 1 | LINC00508  |
| ENSG00000259616 | 0.925067711 | 0 | 2.219027328 | 0.578411265 | 1 | AC104574.2 |
| novel.454       | 0.925067711 | 0 | 2.219027328 | 0.578411265 | 1 | -          |
| ENSG00000233427 | 0.925067711 | 0 | 2.219027328 | 0.578411265 | 1 | AL009181.1 |
| ENSG00000285591 | 0.925067711 | 0 | 2.219027328 | 0.578411265 | 1 | AC092617.1 |
| ENSG00000279205 | 0.925067711 | 0 | 2.219027328 | 0.578411265 | 1 | AC092162.3 |
| ENSG00000225796 | 0.925067711 | 0 | 2.219027328 | 0.578411265 | 1 | MTND4P23   |
| ENSG00000287210 | 0.925067711 | 0 | 2.219027328 | 0.578411265 | 1 | AC074254.2 |
| ENSG00000215246 | 0.925067711 | 0 | 2.219027328 | 0.578411265 | 1 | AC116351.1 |
| ENSG00000286823 | 0.925067711 | 0 | 2.219027328 | 0.578411265 | 1 | AL583829.1 |
| ENSG00000119919 | 0.925067711 | 0 | 2.219027328 | 0.578411265 | 1 | NKX2-3     |
| ENSG00000172551 | 0.925067711 | 0 | 2.219027328 | 0.578411265 | 1 | MUCL1      |
| ENSG00000211785 | 0.925067711 | 0 | 2.219027328 | 0.578411265 | 1 | TRAV12-1   |
| ENSG00000259278 | 0.925067711 | 0 | 2.219027328 | 0.578411265 | 1 | AC087878.1 |

|                 |             |   |             |             |   |            |
|-----------------|-------------|---|-------------|-------------|---|------------|
| ENSG00000235621 | 0.925067711 | 0 | 2.219027328 | 0.578411265 | 1 | LINC00494  |
| novel.809       | 0.925067711 | 0 | 2.219027328 | 0.578411265 | 1 | -          |
| ENSG00000233645 | 0.925067711 | 0 | 2.219027328 | 0.578411265 | 1 | AL358876.2 |
| ENSG00000285823 | 0.925067711 | 0 | 2.219027328 | 0.578411265 | 1 | AL050344.2 |
| ENSG00000276493 | 0.925067711 | 0 | 2.219027328 | 0.578411265 | 1 | RF00017    |
| ENSG00000154198 | 0.925067711 | 0 | 2.219027328 | 0.578411265 | 1 | CYP4Z2P    |
| ENSG00000269933 | 0.925067711 | 0 | 2.219027328 | 0.578411265 | 1 | AL031429.2 |
| ENSG00000229842 | 0.925067711 | 0 | 2.219027328 | 0.578411265 | 1 | MTATP6P13  |
| ENSG00000227408 | 0.925067711 | 0 | 2.219027328 | 0.578411265 | 1 | AMYP1      |
| ENSG00000198967 | 0.925067711 | 0 | 2.219027328 | 0.578411265 | 1 | OR10Z1     |
| ENSG00000231378 | 0.925067711 | 0 | 2.219027328 | 0.578411265 | 1 | NDUF4F4P4  |
| ENSG00000236719 | 0.925067711 | 0 | 2.219027328 | 0.578411265 | 1 | OVAAL      |
| ENSG00000176754 | 0.925067711 | 0 | 2.219027328 | 0.578411265 | 1 | LINC00303  |
| ENSG00000196188 | 0.925067711 | 0 | 2.219027328 | 0.578411265 | 1 | CTSE       |
| ENSG00000234915 | 0.925067711 | 0 | 2.219027328 | 0.578411265 | 1 | AL360091.3 |
| ENSG00000225233 | 0.925067711 | 0 | 2.219027328 | 0.578411265 | 1 | AL592402.1 |
| ENSG00000145063 | 0.925067711 | 0 | 2.219027328 | 0.578411265 | 1 | AC062028.1 |
| ENSG00000242371 | 0.925067711 | 0 | 2.219027328 | 0.578411265 | 1 | IGKV1-39   |
| ENSG00000243104 | 0.925067711 | 0 | 2.219027328 | 0.578411265 | 1 | MTND4LP14  |
| ENSG00000213601 | 0.925067711 | 0 | 2.219027328 | 0.578411265 | 1 | KRT18P19   |
| ENSG00000232994 | 0.925067711 | 0 | 2.219027328 | 0.578411265 | 1 | RPL7P14    |
| ENSG00000277000 | 0.925067711 | 0 | 2.219027328 | 0.578411265 | 1 | DUSP12P1   |
| ENSG00000248243 | 0.925067711 | 0 | 2.219027328 | 0.578411265 | 1 | LINC02014  |
| ENSG00000200571 | 0.925067711 | 0 | 2.219027328 | 0.578411265 | 1 | RNU6-1284P |
| ENSG00000241696 | 0.925067711 | 0 | 2.219027328 | 0.578411265 | 1 | LINC02053  |
| ENSG00000248646 | 0.925067711 | 0 | 2.219027328 | 0.578411265 | 1 | AC096759.1 |
| ENSG00000249646 | 0.925067711 | 0 | 2.219027328 | 0.578411265 | 1 | OR7E94P    |
| ENSG00000287176 | 0.925067711 | 0 | 2.219027328 | 0.578411265 | 1 | AC099517.1 |
| ENSG00000238326 | 0.925067711 | 0 | 2.219027328 | 0.578411265 | 1 | RF01210    |
| ENSG00000251391 | 0.925067711 | 0 | 2.219027328 | 0.578411265 | 1 | AC092353.1 |
| ENSG00000234115 | 0.925067711 | 0 | 2.219027328 | 0.578411265 | 1 | AL138878.2 |
| ENSG00000124564 | 0.925067711 | 0 | 2.219027328 | 0.578411265 | 1 | SLC17A3    |
| ENSG00000270666 | 0.925067711 | 0 | 2.219027328 | 0.578411265 | 1 | AL021918.1 |
| ENSG00000204092 | 0.925067711 | 0 | 2.219027328 | 0.578411265 | 1 | LINC00951  |
| ENSG00000173612 | 0.925067711 | 0 | 2.219027328 | 0.578411265 | 1 | GPRC6A     |
| ENSG00000218233 | 0.925067711 | 0 | 2.219027328 | 0.578411265 | 1 | NEPNP      |
| ENSG00000234647 | 0.925067711 | 0 | 2.219027328 | 0.578411265 | 1 | AL606970.3 |
| ENSG00000256646 | 0.925067711 | 0 | 2.219027328 | 0.578411265 | 1 | AC010132.3 |
| ENSG00000261467 | 0.925067711 | 0 | 2.219027328 | 0.578411265 | 1 | AC099398.1 |
| ENSG00000272647 | 0.925067711 | 0 | 2.219027328 | 0.578411265 | 1 | AC005020.2 |
| ENSG00000282277 | 0.925067711 | 0 | 2.219027328 | 0.578411265 | 1 | CYP3A51P   |
| ENSG00000211765 | 0.925067711 | 0 | 2.219027328 | 0.578411265 | 1 | TRBJ2-2    |
| ENSG00000184788 | 0.925067711 | 0 | 2.219027328 | 0.578411265 | 1 | SATL1      |
| ENSG00000282419 | 0.925067711 | 0 | 2.219027328 | 0.578411265 | 1 | TEX13D     |
| ENSG00000253642 | 0.925067711 | 0 | 2.219027328 | 0.578411265 | 1 | AF279873.3 |
| ENSG00000215262 | 0.925067711 | 0 | 2.219027328 | 0.578411265 | 1 | KCNU1      |
| ENSG00000253596 | 0.925067711 | 0 | 2.219027328 | 0.578411265 | 1 | AC103952.1 |
| ENSG00000253699 | 0.925067711 | 0 | 2.219027328 | 0.578411265 | 1 | AC084128.1 |
| ENSG00000288005 | 0.925067711 | 0 | 2.219027328 | 0.578411265 | 1 | AC104211.4 |
| ENSG00000232211 | 0.925067711 | 0 | 2.219027328 | 0.578411265 | 1 | AL353613.1 |
| ENSG00000276717 | 0.925067711 | 0 | 2.219027328 | 0.578411265 | 1 | AL136097.3 |



|                 |             |             |              |             |             |             |
|-----------------|-------------|-------------|--------------|-------------|-------------|-------------|
| ENSG00000214651 | 0.925067711 | 0           | 2.219027328  | 0.578411265 | 1           | AL513122.1  |
| ENSG00000254471 | 0.925067711 | 0           | 2.219027328  | 0.578411265 | 1           | AP001284.1  |
| ENSG00000254511 | 0.925067711 | 0           | 2.219027328  | 0.578411265 | 1           | AP002802.1  |
| ENSG00000244641 | 0.925067711 | 0           | 2.219027328  | 0.578411265 | 1           | RPS26P43    |
| ENSG00000227356 | 0.925067711 | 0           | 2.219027328  | 0.578411265 | 1           | LINC00866   |
| ENSG00000111704 | 0.925067711 | 0           | 2.219027328  | 0.578411265 | 1           | NANOG       |
| ENSG00000257316 | 0.925067711 | 0           | 2.219027328  | 0.578411265 | 1           | AC087311.1  |
| ENSG00000139648 | 0.925067711 | 0           | 2.219027328  | 0.578411265 | 1           | KRT71       |
| ENSG00000200795 | 0.925067711 | 0           | 2.219027328  | 0.578411265 | 1           | RNU4-1      |
| ENSG00000256590 | 0.925067711 | 0           | 2.219027328  | 0.578411265 | 1           | TRDV3       |
| ENSG00000258196 | 0.925067711 | 0           | 2.219027328  | 0.578411265 | 1           | AL163973.3  |
| ENSG00000258876 | 0.925067711 | 0           | 2.219027328  | 0.578411265 | 1           | TGFB3-AS1   |
| ENSG00000258675 | 0.925067711 | 0           | 2.219027328  | 0.578411265 | 1           | LINC02308   |
| ENSG00000185823 | 0.925067711 | 0           | 2.219027328  | 0.578411265 | 1           | NPAP1       |
| ENSG00000259379 | 0.925067711 | 0           | 2.219027328  | 0.578411265 | 1           | MTND5P32    |
| ENSG00000275785 | 0.925067711 | 0           | 2.219027328  | 0.578411265 | 1           | AC015914.2  |
| ENSG00000286505 | 0.925067711 | 0           | 2.219027328  | 0.578411265 | 1           | AC087468.2  |
| ENSG00000173867 | 0.925067711 | 0           | 2.219027328  | 0.578411265 | 1           | AC013489.1  |
| ENSG00000274312 | 0.925067711 | 0           | 2.219027328  | 0.578411265 | 1           | AC015722.2  |
| ENSG00000262516 | 0.925067711 | 0           | 2.219027328  | 0.578411265 | 1           | AC007151.1  |
| ENSG00000103426 | 0.925067711 | 0           | 2.219027328  | 0.578411265 | 1           | CORO7-PAM16 |
| ENSG00000260818 | 0.925067711 | 0           | 2.219027328  | 0.578411265 | 1           | UNGP1       |
| ENSG00000229442 | 0.925067711 | 0           | 2.219027328  | 0.578411265 | 1           | THEMIS3P    |
| ENSG00000228835 | 0.925067711 | 0           | 2.219027328  | 0.578411265 | 1           | AC012123.1  |
| ENSG00000287381 | 0.925067711 | 0           | 2.219027328  | 0.578411265 | 1           | AC012433.2  |
| ENSG00000264472 | 0.925067711 | 0           | 2.219027328  | 0.578411265 | 1           | AC096708.2  |
| ENSG00000229292 | 0.925067711 | 0           | 2.219027328  | 0.578411265 | 1           | RFPL4AL1    |
| ENSG00000224060 | 0.925067711 | 0           | 2.219027328  | 0.578411265 | 1           | ARSEP1      |
| ENSG00000207575 | 0.925067711 | 0           | 2.219027328  | 0.578411265 | 1           | MIR649      |
| ENSG00000183249 | 0.925067711 | 0           | 2.219027328  | 0.578411265 | 1           | NF1P3       |
| ENSG00000248979 | 1.214547612 | 0.336469917 | 1.65183564   | 0.578487205 | 1           | LAMTOR3P2   |
| ENSG00000241307 | 1.214547612 | 0.336469917 | 1.65183564   | 0.578487205 | 1           | AC104472.2  |
| ENSG00000267395 | 20.8169087  | 25.21127467 | -0.273885186 | 0.578591095 | 0.690667367 | DM1-AS      |
| ENSG00000232179 | 0.293240848 | 1.049547942 | -1.695622856 | 0.578608848 | 1           | MTATP6P29   |
| ENSG00000226890 | 0.293240848 | 1.049547942 | -1.695622856 | 0.578608848 | 1           | Z97652.1    |
| ENSG00000228366 | 0.293240848 | 1.049547942 | -1.695622856 | 0.578608848 | 1           | AL592437.1  |
| ENSG00000213592 | 0.293240848 | 1.049547942 | -1.695622856 | 0.578608848 | 1           | PPIAP42     |
| ENSG00000277561 | 0.293240848 | 1.049547942 | -1.695622856 | 0.578608848 | 1           | GOLGA8IP    |
| ENSG00000274092 | 0.293240848 | 1.049547942 | -1.695622856 | 0.578608848 | 1           | AC106739.1  |
| ENSG00000261673 | 0.293240848 | 1.049547942 | -1.695622856 | 0.578608848 | 1           | AC009075.1  |
| ENSG00000266282 | 0.293240848 | 1.049547942 | -1.695622856 | 0.578608848 | 1           | UBL5P2      |
| ENSG00000261889 | 3.330201067 | 5.450742421 | -0.70802804  | 0.578649605 | 0.690705476 | AC108134.2  |
| ENSG00000232623 | 3.825992426 | 1.702418679 | 1.156908796  | 0.578711939 | 0.690748146 | AP000266.1  |
| ENSG00000280660 | 0.923814062 | 0           | 2.217246121  | 0.578726329 | 1           | AL157396.1  |
| ENSG00000172421 | 0.923814062 | 0           | 2.217246121  | 0.578726329 | 1           | EFCAB3      |
| ENSG00000128040 | 0.923814062 | 0           | 2.217246121  | 0.578726329 | 1           | SPINK2      |
| ENSG00000259704 | 0.923814062 | 0           | 2.217246121  | 0.578726329 | 1           | AC124248.1  |
| ENSG00000254192 | 0.923814062 | 0           | 2.217246121  | 0.578726329 | 1           | AC011365.2  |
| ENSG00000267206 | 0.923814062 | 0           | 2.217246121  | 0.578726329 | 1           | LCN6        |
| novel.338       | 0.923814062 | 0           | 2.217246121  | 0.578726329 | 1           | -           |
| ENSG00000271820 | 0.923814062 | 0           | 2.217246121  | 0.578726329 | 1           | AL109910.2  |

|                 |             |   |             |             |   |            |
|-----------------|-------------|---|-------------|-------------|---|------------|
| ENSG00000150201 | 0.923814062 | 0 | 2.217246121 | 0.578726329 | 1 | FXYD4      |
| ENSG00000266463 | 0.923814062 | 0 | 2.217246121 | 0.578726329 | 1 | MIR3196    |
| ENSG00000262543 | 0.923814062 | 0 | 2.217246121 | 0.578726329 | 1 | SMIM28     |
| ENSG00000254709 | 0.923814062 | 0 | 2.217246121 | 0.578726329 | 1 | IGLL5      |
| ENSG00000254042 | 0.923814062 | 0 | 2.217246121 | 0.578726329 | 1 | AC011365.1 |
| ENSG00000270137 | 0.923814062 | 0 | 2.217246121 | 0.578726329 | 1 | AF230666.2 |
| ENSG00000267026 | 0.923814062 | 0 | 2.217246121 | 0.578726329 | 1 | AL136084.2 |
| ENSG00000173157 | 0.923814062 | 0 | 2.217246121 | 0.578726329 | 1 | ADAMTS20   |
| ENSG00000284516 | 0.923814062 | 0 | 2.217246121 | 0.578726329 | 1 | VAMP9P     |
| ENSG00000251244 | 0.923814062 | 0 | 2.217246121 | 0.578726329 | 1 | AC107208.1 |
| ENSG00000133962 | 0.923814062 | 0 | 2.217246121 | 0.578726329 | 1 | CATSPERB   |
| ENSG00000258712 | 0.923814062 | 0 | 2.217246121 | 0.578726329 | 1 | CXADRP2    |
| ENSG00000229407 | 0.923814062 | 0 | 2.217246121 | 0.578726329 | 1 | AL359853.1 |
| ENSG00000216687 | 0.923814062 | 0 | 2.217246121 | 0.578726329 | 1 | AL390237.1 |
| ENSG00000231255 | 0.923814062 | 0 | 2.217246121 | 0.578726329 | 1 | AC005009.1 |
| ENSG00000241743 | 0.923814062 | 0 | 2.217246121 | 0.578726329 | 1 | XACT       |
| ENSG00000278654 | 0.923814062 | 0 | 2.217246121 | 0.578726329 | 1 | AC007450.4 |
| ENSG00000258642 | 0.923814062 | 0 | 2.217246121 | 0.578726329 | 1 | AL133371.1 |
| ENSG00000211796 | 0.923814062 | 0 | 2.217246121 | 0.578726329 | 1 | TRAV16     |
| ENSG00000258637 | 0.923814062 | 0 | 2.217246121 | 0.578726329 | 1 | AC008056.1 |
| ENSG00000211945 | 0.923814062 | 0 | 2.217246121 | 0.578726329 | 1 | IGHV1-18   |
| ENSG00000259222 | 0.923814062 | 0 | 2.217246121 | 0.578726329 | 1 | AC027088.2 |
| ENSG00000235665 | 0.923814062 | 0 | 2.217246121 | 0.578726329 | 1 | LINC00298  |
| ENSG00000270292 | 0.923814062 | 0 | 2.217246121 | 0.578726329 | 1 | AC079880.2 |
| ENSG00000248874 | 0.923814062 | 0 | 2.217246121 | 0.578726329 | 1 | C5orf17    |
| ENSG00000236104 | 0.923814062 | 0 | 2.217246121 | 0.578726329 | 1 | ZBTB22     |
| ENSG00000225992 | 0.923814062 | 0 | 2.217246121 | 0.578726329 | 1 | TRGVA      |
| ENSG00000164756 | 0.923814062 | 0 | 2.217246121 | 0.578726329 | 1 | SLC30A8    |
| ENSG00000207609 | 0.923814062 | 0 | 2.217246121 | 0.578726329 | 1 | MIR491     |
| ENSG00000151963 | 0.923814062 | 0 | 2.217246121 | 0.578726329 | 1 | ZNF37CP    |
| ENSG00000122043 | 0.923814062 | 0 | 2.217246121 | 0.578726329 | 1 | LINC00544  |
| ENSG00000129354 | 0.923814062 | 0 | 2.217246121 | 0.578726329 | 1 | AP1M2      |
| ENSG00000287219 | 0.923814062 | 0 | 2.217246121 | 0.578726329 | 1 | AL021707.9 |
| ENSG00000238498 | 0.923814062 | 0 | 2.217246121 | 0.578726329 | 1 | SNORD13P1  |
| ENSG00000282740 | 0.923814062 | 0 | 2.217246121 | 0.578726329 | 1 | AL021920.3 |
| ENSG00000232780 | 0.923814062 | 0 | 2.217246121 | 0.578726329 | 1 | GAPDHP74   |
| ENSG00000273106 | 0.923814062 | 0 | 2.217246121 | 0.578726329 | 1 | AC019129.2 |
| ENSG00000248991 | 0.923814062 | 0 | 2.217246121 | 0.578726329 | 1 | AC097375.1 |
| ENSG00000277769 | 0.923814062 | 0 | 2.217246121 | 0.578726329 | 1 | RBM22P4    |
| ENSG00000236712 | 0.923814062 | 0 | 2.217246121 | 0.578726329 | 1 | AC079448.1 |
| ENSG00000211724 | 0.923814062 | 0 | 2.217246121 | 0.578726329 | 1 | TRBV6-6    |
| ENSG00000164893 | 0.923814062 | 0 | 2.217246121 | 0.578726329 | 1 | SLC7A13    |
| ENSG00000233721 | 0.923814062 | 0 | 2.217246121 | 0.578726329 | 1 | AL356309.2 |
| ENSG00000255440 | 0.923814062 | 0 | 2.217246121 | 0.578726329 | 1 | AP001085.1 |
| ENSG00000286374 | 0.923814062 | 0 | 2.217246121 | 0.578726329 | 1 | AP001999.5 |
| ENSG00000202470 | 0.923814062 | 0 | 2.217246121 | 0.578726329 | 1 | RF00019    |
| ENSG00000211802 | 0.923814062 | 0 | 2.217246121 | 0.578726329 | 1 | TRAV22     |
| ENSG00000249240 | 0.923814062 | 0 | 2.217246121 | 0.578726329 | 1 | AC069368.1 |
| ENSG00000207425 | 0.923814062 | 0 | 2.217246121 | 0.578726329 | 1 | RF00019    |
| ENSG00000272798 | 0.923814062 | 0 | 2.217246121 | 0.578726329 | 1 | AL008721.1 |
| novel.1040      | 0.923814062 | 0 | 2.217246121 | 0.578726329 | 1 | -          |

|                 |             |             |              |             |             |             |
|-----------------|-------------|-------------|--------------|-------------|-------------|-------------|
| ENSG00000158863 | 1191.630178 | 1297.682962 | -0.122740136 | 0.57877819  | 0.690795486 | FAM160B2    |
| ENSG00000229419 | 45.30636543 | 37.73618607 | 0.262058205  | 0.578851094 | 0.690850763 | RALGAPA1P1  |
| ENSG00000287369 | 10.76480509 | 6.735258924 | 0.671765518  | 0.578971019 | 0.690962152 | AC1111197.1 |
| novel.1041      | 0.922560414 | 0           | 2.215463037  | 0.579041801 | 1           | -           |
| ENSG00000288011 | 0.922560414 | 0           | 2.215463037  | 0.579041801 | 1           | AC024597.1  |
| ENSG00000177692 | 0.922560414 | 0           | 2.215463037  | 0.579041801 | 1           | DNAJC28     |
| ENSG00000211668 | 0.922560414 | 0           | 2.215463037  | 0.579041801 | 1           | IGLV2-11    |
| ENSG00000229887 | 0.922560414 | 0           | 2.215463037  | 0.579041801 | 1           | HNRNPA1P6   |
| ENSG00000239571 | 0.922560414 | 0           | 2.215463037  | 0.579041801 | 1           | IGKV2D-30   |
| ENSG00000253983 | 0.922560414 | 0           | 2.215463037  | 0.579041801 | 1           | AC087627.1  |
| ENSG00000235815 | 0.922560414 | 0           | 2.215463037  | 0.579041801 | 1           | AL136099.1  |
| ENSG00000234026 | 0.922560414 | 0           | 2.215463037  | 0.579041801 | 1           | AL157834.2  |
| ENSG00000211651 | 0.922560414 | 0           | 2.215463037  | 0.579041801 | 1           | IGLV1-44    |
| ENSG00000214425 | 0.922560414 | 0           | 2.215463037  | 0.579041801 | 1           | LRRRC37A4P  |
| ENSG00000238151 | 0.922560414 | 0           | 2.215463037  | 0.579041801 | 1           | MLLT10P1    |
| ENSG00000227070 | 0.922560414 | 0           | 2.215463037  | 0.579041801 | 1           | AC104170.1  |
| ENSG00000184731 | 0.922560414 | 0           | 2.215463037  | 0.579041801 | 1           | FAM110C     |
| ENSG00000273006 | 0.922560414 | 0           | 2.215463037  | 0.579041801 | 1           | AC009229.3  |
| ENSG00000222004 | 0.922560414 | 0           | 2.215463037  | 0.579041801 | 1           | C7orf71     |
| ENSG00000270492 | 0.922560414 | 0           | 2.215463037  | 0.579041801 | 1           | AC137695.1  |
| ENSG00000276266 | 0.922560414 | 0           | 2.215463037  | 0.579041801 | 1           | FP325318.1  |
| ENSG00000225533 | 0.922560414 | 0           | 2.215463037  | 0.579041801 | 1           | PAWRP1      |
| ENSG00000197446 | 0.922560414 | 0           | 2.215463037  | 0.579041801 | 1           | CYP2F1      |
| ENSG00000229961 | 0.922560414 | 0           | 2.215463037  | 0.579041801 | 1           | AL357143.1  |
| ENSG00000249858 | 0.922560414 | 0           | 2.215463037  | 0.579041801 | 1           | SNX5P1      |
| ENSG00000168830 | 0.922560414 | 0           | 2.215463037  | 0.579041801 | 1           | HTR1E       |
| ENSG00000225647 | 0.922560414 | 0           | 2.215463037  | 0.579041801 | 1           | AC005487.1  |
| ENSG00000204033 | 0.922560414 | 0           | 2.215463037  | 0.579041801 | 1           | LRIT2       |
| ENSG00000268864 | 0.922560414 | 0           | 2.215463037  | 0.579041801 | 1           | AC011487.2  |
| ENSG00000224481 | 0.922560414 | 0           | 2.215463037  | 0.579041801 | 1           | AC245100.1  |
| ENSG00000236317 | 0.922560414 | 0           | 2.215463037  | 0.579041801 | 1           | AC104333.2  |
| ENSG00000203645 | 0.922560414 | 0           | 2.215463037  | 0.579041801 | 1           | LINC00501   |
| ENSG00000189325 | 0.922560414 | 0           | 2.215463037  | 0.579041801 | 1           | C6orf222    |
| ENSG00000213133 | 0.922560414 | 0           | 2.215463037  | 0.579041801 | 1           | PPP1R14BP5  |
| ENSG00000205236 | 0.922560414 | 0           | 2.215463037  | 0.579041801 | 1           | AC105052.1  |
| ENSG00000286565 | 0.922560414 | 0           | 2.215463037  | 0.579041801 | 1           | AC006348.1  |
| ENSG00000230823 | 0.922560414 | 0           | 2.215463037  | 0.579041801 | 1           | CBX1P1      |
| ENSG00000225569 | 0.922560414 | 0           | 2.215463037  | 0.579041801 | 1           | CCT4P2      |
| ENSG00000237385 | 0.922560414 | 0           | 2.215463037  | 0.579041801 | 1           | AL583839.1  |
| ENSG00000229227 | 0.922560414 | 0           | 2.215463037  | 0.579041801 | 1           | AL356056.1  |
| ENSG00000219430 | 0.922560414 | 0           | 2.215463037  | 0.579041801 | 1           | MBL3P       |
| ENSG00000264572 | 0.922560414 | 0           | 2.215463037  | 0.579041801 | 1           | MIR4296     |
| ENSG00000257958 | 0.922560414 | 0           | 2.215463037  | 0.579041801 | 1           | AC008125.1  |
| ENSG00000230731 | 0.922560414 | 0           | 2.215463037  | 0.579041801 | 1           | AL589745.1  |
| ENSG00000229918 | 0.922560414 | 0           | 2.215463037  | 0.579041801 | 1           | DOCK9-AS1   |
| ENSG00000134760 | 0.922560414 | 0           | 2.215463037  | 0.579041801 | 1           | DSG1        |
| ENSG00000264395 | 0.922560414 | 0           | 2.215463037  | 0.579041801 | 1           | MIR3193     |
| ENSG00000264901 | 0.922560414 | 0           | 2.215463037  | 0.579041801 | 1           | MIR3616     |
| ENSG00000269345 | 0.922560414 | 0           | 2.215463037  | 0.579041801 | 1           | VN1R85P     |
| ENSG00000287035 | 0.922560414 | 0           | 2.215463037  | 0.579041801 | 1           | AC138470.2  |
| ENSG00000267895 | 0.922560414 | 0           | 2.215463037  | 0.579041801 | 1           | AC063977.1  |

|                 |             |             |             |             |             |             |
|-----------------|-------------|-------------|-------------|-------------|-------------|-------------|
| ENSG00000273979 | 0.922560414 | 0           | 2.215463037 | 0.579041801 | 1           | RF00017     |
| ENSG00000015413 | 2.459325337 | 1.110911105 | 1.156981103 | 0.579042317 | 0.691015499 | DPEP1       |
| ENSG00000258682 | 39.8729052  | 32.11183825 | 0.312482832 | 0.579200297 | 0.691172282 | AL132989.1  |
| ENSG00000165983 | 124.0735844 | 101.4286907 | 0.289542652 | 0.57925493  | 0.691205729 | PTER        |
| ENSG00000165566 | 0.921306765 | 0           | 2.213678098 | 0.579357677 | 1           | AMER2       |
| ENSG00000277229 | 0.921306765 | 0           | 2.213678098 | 0.579357677 | 1           | AC084781.1  |
| ENSG00000273540 | 0.921306765 | 0           | 2.213678098 | 0.579357677 | 1           | AGBL1       |
| ENSG00000132911 | 0.921306765 | 0           | 2.213678098 | 0.579357677 | 1           | NMUR2       |
| ENSG00000253404 | 0.921306765 | 0           | 2.213678098 | 0.579357677 | 1           | AC034243.1  |
| ENSG00000226886 | 0.921306765 | 0           | 2.213678098 | 0.579357677 | 1           | AC093787.1  |
| ENSG00000227617 | 0.921306765 | 0           | 2.213678098 | 0.579357677 | 1           | CERS6-AS1   |
| ENSG00000152595 | 0.921306765 | 0           | 2.213678098 | 0.579357677 | 1           | MEPE        |
| ENSG00000275939 | 0.921306765 | 0           | 2.213678098 | 0.579357677 | 1           | RF02271     |
| ENSG00000226426 | 0.921306765 | 0           | 2.213678098 | 0.579357677 | 1           | AC012558.1  |
| ENSG00000261089 | 0.921306765 | 0           | 2.213678098 | 0.579357677 | 1           | CDC37P2     |
| ENSG00000272221 | 0.921306765 | 0           | 2.213678098 | 0.579357677 | 1           | AL645933.2  |
| ENSG00000252643 | 0.921306765 | 0           | 2.213678098 | 0.579357677 | 1           | RNU6-1136P  |
| ENSG00000288050 | 0.921306765 | 0           | 2.213678098 | 0.579357677 | 1           | AC010727.1  |
| ENSG00000237161 | 0.921306765 | 0           | 2.213678098 | 0.579357677 | 1           | AC068446.1  |
| ENSG00000264449 | 0.921306765 | 0           | 2.213678098 | 0.579357677 | 1           | AP001021.1  |
| ENSG00000232892 | 0.921306765 | 0           | 2.213678098 | 0.579357677 | 1           | AL499616.1  |
| ENSG00000213046 | 0.921306765 | 0           | 2.213678098 | 0.579357677 | 1           | EEF1A1P32   |
| ENSG00000205794 | 0.921306765 | 0           | 2.213678098 | 0.579357677 | 1           | AC098591.1  |
| ENSG00000250488 | 0.921306765 | 0           | 2.213678098 | 0.579357677 | 1           | LINC02233   |
| ENSG00000213376 | 0.921306765 | 0           | 2.213678098 | 0.579357677 | 1           | GAPDHP71    |
| ENSG00000230205 | 0.921306765 | 0           | 2.213678098 | 0.579357677 | 1           | AL359382.1  |
| ENSG00000177418 | 0.921306765 | 0           | 2.213678098 | 0.579357677 | 1           | AC006001.1  |
| ENSG00000233821 | 0.921306765 | 0           | 2.213678098 | 0.579357677 | 1           | ENOX1-AS1   |
| ENSG00000264443 | 0.921306765 | 0           | 2.213678098 | 0.579357677 | 1           | AL445686.2  |
| ENSG00000230790 | 0.921306765 | 0           | 2.213678098 | 0.579357677 | 1           | AC012456.2  |
| ENSG00000249506 | 0.921306765 | 0           | 2.213678098 | 0.579357677 | 1           | ZEB2P1      |
| ENSG00000259663 | 0.921306765 | 0           | 2.213678098 | 0.579357677 | 1           | AC010478.1  |
| ENSG00000203942 | 0.921306765 | 0           | 2.213678098 | 0.579357677 | 1           | C10orf62    |
| ENSG00000270685 | 0.921306765 | 0           | 2.213678098 | 0.579357677 | 1           | IGHV1OR15-6 |
| ENSG00000279091 | 0.921306765 | 0           | 2.213678098 | 0.579357677 | 1           | AC026523.2  |
| ENSG00000242439 | 0.921306765 | 0           | 2.213678098 | 0.579357677 | 1           | AC127024.1  |
| ENSG00000237845 | 0.921306765 | 0           | 2.213678098 | 0.579357677 | 1           | AL139161.2  |
| ENSG00000175077 | 0.921306765 | 0           | 2.213678098 | 0.579357677 | 1           | RTP1        |
| ENSG00000260981 | 0.921306765 | 0           | 2.213678098 | 0.579357677 | 1           | AC091932.1  |
| ENSG00000248362 | 0.921306765 | 0           | 2.213678098 | 0.579357677 | 1           | AC011352.1  |
| ENSG00000282024 | 0.921306765 | 0           | 2.213678098 | 0.579357677 | 1           | AL009031.1  |
| ENSG00000227581 | 0.921306765 | 0           | 2.213678098 | 0.579357677 | 1           | AL121877.1  |
| ENSG00000253894 | 0.921306765 | 0           | 2.213678098 | 0.579357677 | 1           | AC011124.2  |
| ENSG00000256650 | 0.921306765 | 0           | 2.213678098 | 0.579357677 | 1           | RRRG-IT1    |
| ENSG00000261458 | 0.921306765 | 0           | 2.213678098 | 0.579357677 | 1           | AC009132.1  |
| ENSG00000232724 | 0.921306765 | 0           | 2.213678098 | 0.579357677 | 1           | TRIM80P     |
| ENSG00000266578 | 0.921306765 | 0           | 2.213678098 | 0.579357677 | 1           | AP001025.1  |
| ENSG00000284071 | 0.921306765 | 0           | 2.213678098 | 0.579357677 | 1           | AC012005.2  |
| ENSG00000235578 | 0.921306765 | 0           | 2.213678098 | 0.579357677 | 1           | AC007731.2  |
| ENSG00000225982 | 0.921306765 | 0           | 2.213678098 | 0.579357677 | 1           | AL355482.2  |
| ENSG00000205940 | 0.921306765 | 0           | 2.213678098 | 0.579357677 | 1           | HSP90AB2P   |

|                 |             |   |             |             |   |            |
|-----------------|-------------|---|-------------|-------------|---|------------|
| ENSG00000251620 | 0.921306765 | 0 | 2.213678098 | 0.579357677 | 1 | STPG2-AS1  |
| ENSG00000250831 | 0.921306765 | 0 | 2.213678098 | 0.579357677 | 1 | AC074131.1 |
| ENSG00000136929 | 0.921306765 | 0 | 2.213678098 | 0.579357677 | 1 | HEMGN      |
| ENSG00000237906 | 0.921306765 | 0 | 2.213678098 | 0.579357677 | 1 | MUPP       |
| ENSG00000222578 | 0.921306765 | 0 | 2.213678098 | 0.579357677 | 1 | RNA5SP345  |
| ENSG00000213272 | 0.921306765 | 0 | 2.213678098 | 0.579357677 | 1 | RPL7AP9    |
| ENSG00000229521 | 0.921306765 | 0 | 2.213678098 | 0.579357677 | 1 | MYCBP2-AS2 |
| ENSG00000259707 | 0.921306765 | 0 | 2.213678098 | 0.579357677 | 1 | AC105339.4 |
| ENSG00000266955 | 0.921306765 | 0 | 2.213678098 | 0.579357677 | 1 | AP001269.1 |
| ENSG00000265374 | 0.921306765 | 0 | 2.213678098 | 0.579357677 | 1 | LINC01908  |
| ENSG00000235038 | 0.921306765 | 0 | 2.213678098 | 0.579357677 | 1 | AL445193.2 |
| ENSG00000274895 | 0.921306765 | 0 | 2.213678098 | 0.579357677 | 1 | AC011700.1 |
| ENSG00000234464 | 0.921306765 | 0 | 2.213678098 | 0.579357677 | 1 | AL356010.2 |
| ENSG00000229550 | 0.921306765 | 0 | 2.213678098 | 0.579357677 | 1 | AC012445.1 |
| ENSG00000184303 | 0.921306765 | 0 | 2.213678098 | 0.579357677 | 1 | DRD5P1     |
| ENSG00000198526 | 0.921306765 | 0 | 2.213678098 | 0.579357677 | 1 | PABPC1P2   |
| ENSG00000241535 | 0.921306765 | 0 | 2.213678098 | 0.579357677 | 1 | CBX5P1     |
| ENSG00000286321 | 0.921306765 | 0 | 2.213678098 | 0.579357677 | 1 | AC093791.2 |
| ENSG00000250781 | 0.921306765 | 0 | 2.213678098 | 0.579357677 | 1 | AC024022.1 |
| ENSG00000207058 | 0.921306765 | 0 | 2.213678098 | 0.579357677 | 1 | RNU6-784P  |
| ENSG00000286751 | 0.921306765 | 0 | 2.213678098 | 0.579357677 | 1 | AC140168.1 |
| ENSG00000271986 | 0.921306765 | 0 | 2.213678098 | 0.579357677 | 1 | RN7SL827P  |
| ENSG00000219702 | 0.921306765 | 0 | 2.213678098 | 0.579357677 | 1 | AL078599.1 |
| ENSG00000218536 | 0.921306765 | 0 | 2.213678098 | 0.579357677 | 1 | AP002530.1 |
| ENSG00000231690 | 0.921306765 | 0 | 2.213678098 | 0.579357677 | 1 | LINC00574  |
| ENSG00000233028 | 0.921306765 | 0 | 2.213678098 | 0.579357677 | 1 | AC006970.2 |
| ENSG00000252713 | 0.921306765 | 0 | 2.213678098 | 0.579357677 | 1 | RNU6-1198P |
| ENSG00000282133 | 0.921306765 | 0 | 2.213678098 | 0.579357677 | 1 | TRBJ1-3    |
| ENSG00000260426 | 0.921306765 | 0 | 2.213678098 | 0.579357677 | 1 | AC008060.4 |
| ENSG00000125363 | 0.921306765 | 0 | 2.213678098 | 0.579357677 | 1 | AMELX      |
| ENSG00000185053 | 0.921306765 | 0 | 2.213678098 | 0.579357677 | 1 | SGCZ       |
| ENSG00000279083 | 0.921306765 | 0 | 2.213678098 | 0.579357677 | 1 | AL160274.1 |
| ENSG00000213816 | 0.921306765 | 0 | 2.213678098 | 0.579357677 | 1 | CNN2P4     |
| ENSG00000234042 | 0.921306765 | 0 | 2.213678098 | 0.579357677 | 1 | AL591438.2 |
| ENSG00000165643 | 0.921306765 | 0 | 2.213678098 | 0.579357677 | 1 | SOHLH1     |
| ENSG00000254831 | 0.921306765 | 0 | 2.213678098 | 0.579357677 | 1 | KRT18P58   |
| ENSG00000240975 | 0.921306765 | 0 | 2.213678098 | 0.579357677 | 1 | AC021723.1 |
| ENSG00000285842 | 0.921306765 | 0 | 2.213678098 | 0.579357677 | 1 | AP000820.2 |
| ENSG00000176343 | 0.921306765 | 0 | 2.213678098 | 0.579357677 | 1 | RPL37AP8   |
| ENSG00000285402 | 0.921306765 | 0 | 2.213678098 | 0.579357677 | 1 | AC244230.2 |
| ENSG00000231082 | 0.921306765 | 0 | 2.213678098 | 0.579357677 | 1 | LINC02655  |
| ENSG00000207136 | 0.921306765 | 0 | 2.213678098 | 0.579357677 | 1 | RNU6-769P  |
| ENSG00000286279 | 0.921306765 | 0 | 2.213678098 | 0.579357677 | 1 | AC108721.2 |
| ENSG00000279462 | 0.921306765 | 0 | 2.213678098 | 0.579357677 | 1 | AC093028.1 |
| ENSG00000226683 | 0.921306765 | 0 | 2.213678098 | 0.579357677 | 1 | PWWP2AP1   |
| ENSG00000173464 | 0.921306765 | 0 | 2.213678098 | 0.579357677 | 1 | RNASE11    |
| ENSG00000257272 | 0.921306765 | 0 | 2.213678098 | 0.579357677 | 1 | AL162311.1 |
| ENSG00000258767 | 0.921306765 | 0 | 2.213678098 | 0.579357677 | 1 | AC060814.2 |
| ENSG00000244705 | 0.921306765 | 0 | 2.213678098 | 0.579357677 | 1 | AC020658.1 |
| ENSG00000260289 | 0.921306765 | 0 | 2.213678098 | 0.579357677 | 1 | AC093515.1 |
| ENSG00000169877 | 0.921306765 | 0 | 2.213678098 | 0.579357677 | 1 | AHSP       |

|                 |             |             |              |             |             |             |
|-----------------|-------------|-------------|--------------|-------------|-------------|-------------|
| ENSG00000261320 | 0.921306765 | 0           | 2.213678098  | 0.579357677 | 1           | AC009061.1  |
| ENSG00000252101 | 0.921306765 | 0           | 2.213678098  | 0.579357677 | 1           | RNU6-758P   |
| ENSG00000239809 | 0.921306765 | 0           | 2.213678098  | 0.579357677 | 1           | AC008026.2  |
| ENSG00000264840 | 0.921306765 | 0           | 2.213678098  | 0.579357677 | 1           | RN7SL404P   |
| ENSG00000265477 | 0.921306765 | 0           | 2.213678098  | 0.579357677 | 1           | AP000915.2  |
| ENSG00000261520 | 0.921306765 | 0           | 2.213678098  | 0.579357677 | 1           | DLGAP1-AS5  |
| ENSG00000264714 | 0.921306765 | 0           | 2.213678098  | 0.579357677 | 1           | KIAA0895LP1 |
| ENSG00000277743 | 0.921306765 | 0           | 2.213678098  | 0.579357677 | 1           | AP005212.3  |
| ENSG00000242509 | 0.921306765 | 0           | 2.213678098  | 0.579357677 | 1           | RN7SL156P   |
| ENSG00000263974 | 0.921306765 | 0           | 2.213678098  | 0.579357677 | 1           | RN7SL121P   |
| ENSG00000267338 | 0.921306765 | 0           | 2.213678098  | 0.579357677 | 1           | AP000365.1  |
| ENSG00000228592 | 0.921306765 | 0           | 2.213678098  | 0.579357677 | 1           | AP000459.2  |
| ENSG00000232079 | 0.921306765 | 0           | 2.213678098  | 0.579357677 | 1           | LINC01697   |
| ENSG00000275263 | 5.492524611 | 3.331577441 | 0.730321733  | 0.579368184 | 0.691282186 | AC135048.3  |
| ENSG00000181274 | 180.4456605 | 158.3048896 | 0.188985916  | 0.579384291 | 0.691282186 | FRAT2       |
| ENSG00000204177 | 71.39645259 | 58.84144211 | 0.278985226  | 0.579398825 | 0.691282186 | BMS1P1      |
| ENSG00000233230 | 42.69749918 | 36.73610454 | 0.21809012   | 0.579475878 | 0.691342369 | AC079807.1  |
| ENSG00000238186 | 5.421963925 | 7.46010531  | -0.462397416 | 0.579594395 | 0.691426488 | AL603839.2  |
| ENSG00000100395 | 505.8752567 | 566.1957458 | -0.162802636 | 0.579599611 | 0.691426488 | L3MBTL2     |
| ENSG00000152484 | 900.943708  | 808.4059551 | 0.156588347  | 0.579700911 | 0.69149268  | USP12       |
| novel.386       | 3.030691976 | 1.426156051 | 1.084055888  | 0.579708328 | 0.69149268  | -           |
| ENSG00000163807 | 57.17002573 | 77.13320594 | -0.432928637 | 0.579836055 | 0.691613283 | KIAA1143    |
| ENSG00000272034 | 31.08438404 | 25.45672732 | 0.292790587  | 0.580070728 | 0.691861432 | SNORD14A    |
| ENSG00000261556 | 108.3313927 | 95.42418592 | 0.180672439  | 0.580319847 | 0.692074084 | SMG1P7      |
| ENSG00000213888 | 46.35117121 | 38.8010984  | 0.251862863  | 0.580348468 | 0.692074084 | LINC01521   |
| ENSG00000111641 | 23.53548382 | 28.10603671 | -0.25335636  | 0.580349847 | 0.692074084 | NOP2        |
| ENSG00000254873 | 3.65116473  | 5.564012137 | -0.598306405 | 0.58035557  | 0.692074084 | AP001267.1  |
| ENSG00000113657 | 893.7784073 | 754.5983464 | 0.244204733  | 0.580387349 | 0.692075168 | DPYSL3      |
| novel.662       | 14.20303411 | 8.365445166 | 0.771264861  | 0.580424709 | 0.692075168 | -           |
| ENSG00000125386 | 731.9410529 | 657.0994192 | 0.156055855  | 0.580467506 | 0.692075168 | FAM193A     |
| ENSG00000038002 | 331.8440534 | 285.7579061 | 0.215072836  | 0.580478051 | 0.692075168 | AGA         |
| ENSG00000278917 | 9.031544433 | 12.05484589 | -0.408676246 | 0.580489668 | 0.692075168 | AC006213.6  |
| ENSG00000001460 | 173.9931951 | 203.0567884 | -0.221691618 | 0.580563152 | 0.692131017 | STPG1       |
| ENSG00000273001 | 5.240796714 | 2.629111901 | 1.004154716  | 0.580593179 | 0.692135055 | AL731533.2  |
| ENSG00000139278 | 949.7261352 | 1130.390978 | -0.251359668 | 0.580675269 | 0.692191905 | GLIPR1      |
| ENSG00000277588 | 0.586481695 | 1.436768536 | -1.275945223 | 0.580690177 | 1           | MIR6806     |
| ENSG00000212205 | 0.586481695 | 1.436768536 | -1.275945223 | 0.580690177 | 1           | RF00019     |
| ENSG00000197238 | 3.369277992 | 5.349241065 | -0.67310324  | 0.580694152 | 0.692191905 | HIST1H4J    |
| ENSG00000254985 | 1.773306493 | 0.743759607 | 1.275860136  | 0.580732982 | 1           | RSF1-IT2    |
| ENSG00000179406 | 175.6524188 | 150.8657994 | 0.218328381  | 0.580741254 | 0.692216292 | LINC00174   |
| ENSG00000235173 | 425.9715134 | 495.2571019 | -0.218050081 | 0.580805738 | 0.692261394 | HGH1        |
| ENSG00000278864 | 105.7221705 | 91.33202465 | 0.212195201  | 0.580860001 | 0.692294311 | AC055811.4  |
| ENSG00000283098 | 2.766427592 | 1.069617038 | 1.366401377  | 0.580940397 | 0.69235837  | AL132857.1  |
| ENSG00000276727 | 0.308355904 | 1.345879667 | -2.055920433 | 0.581081545 | 1           | AC137834.2  |
| ENSG00000244280 | 0.308355904 | 1.345879667 | -2.055920433 | 0.581081545 | 1           | ECEL1P2     |
| ENSG00000225180 | 1.524157165 | 0.723690511 | 1.078160767  | 0.581149084 | 1           | PVALEF      |
| ENSG00000279964 | 1.524157165 | 0.723690511 | 1.078160767  | 0.581149084 | 1           | AC009949.1  |
| ENSG00000251803 | 0.307102255 | 1.345879667 | -2.055916621 | 0.581166952 | 1           | RF00019     |
| ENSG00000055813 | 3.050821627 | 5.227670614 | -0.785648716 | 0.581209768 | 0.69264763  | CCDC85A     |
| ENSG00000248473 | 3.078544442 | 1.456837632 | 1.081413999  | 0.58139042  | 0.692831139 | LINC01962   |
| novel.870       | 67.20493427 | 80.78396235 | -0.268447116 | 0.581438776 | 0.692856985 | -           |

|                 |             |             |              |             |             |            |
|-----------------|-------------|-------------|--------------|-------------|-------------|------------|
| ENSG00000277681 | 2.096777453 | 3.475657132 | -0.736055591 | 0.581471226 | 0.692863875 | MIR6739    |
| ENSG00000272405 | 7.620785824 | 10.54738597 | -0.476960701 | 0.581705266 | 0.693110961 | AL365181.3 |
| ENSG00000186710 | 4.720830024 | 2.629111901 | 0.863287368  | 0.581773667 | 0.693160674 | CFAP73     |
| ENSG00000274427 | 0.616711807 | 1.733100261 | -1.503524651 | 0.581817458 | 1           | AC145423.2 |
| ENSG00000253483 | 0.616711807 | 1.733100261 | -1.503524651 | 0.581817458 | 1           | AC104561.2 |
| ENSG00000225385 | 0.616711807 | 1.733100261 | -1.503524651 | 0.581817458 | 1           | AL353572.1 |
| ENSG00000257551 | 4.836735879 | 3.005720009 | 0.705383281  | 0.581912771 | 0.69328763  | HLX-AS1    |
| ENSG00000180673 | 8.856716737 | 6.23695197  | 0.512348298  | 0.581933591 | 0.69328763  | EXOC5P1    |
| ENSG00000263513 | 28.94727602 | 35.91682044 | -0.312121098 | 0.581980705 | 0.693311968 | FAM72C     |
| ENSG00000233757 | 7.842212337 | 11.3100588  | -0.530908806 | 0.58204772  | 0.69336001  | AC092835.1 |
| ENSG00000272507 | 0.293240848 | 1.345879667 | -2.055875741 | 0.58208462  | 1           | RNU6-88P   |
| ENSG00000105278 | 1.541779519 | 0.387220594 | 1.994781109  | 0.582145617 | 1           | ZFR2       |
| ENSG00000278177 | 1.541779519 | 0.387220594 | 1.994781109  | 0.582145617 | 1           | AL354811.1 |
| ENSG00000204683 | 0.909952655 | 0           | 2.19733956   | 0.582252606 | 1           | C10orf113  |
| novel.481       | 0.909952655 | 0           | 2.19733956   | 0.582252606 | 1           | -          |
| ENSG00000250853 | 0.909952655 | 0           | 2.19733956   | 0.582252606 | 1           | RNF138P1   |
| ENSG00000233750 | 0.909952655 | 0           | 2.19733956   | 0.582252606 | 1           | CICP27     |
| ENSG00000007372 | 0.909952655 | 0           | 2.19733956   | 0.582252606 | 1           | PAX6       |
| ENSG00000220154 | 0.909952655 | 0           | 2.19733956   | 0.582252606 | 1           | AL355796.1 |
| ENSG00000185681 | 0.909952655 | 0           | 2.19733956   | 0.582252606 | 1           | MORN5      |
| ENSG00000270540 | 0.909952655 | 0           | 2.19733956   | 0.582252606 | 1           | AC093915.1 |
| ENSG00000240086 | 0.909952655 | 0           | 2.19733956   | 0.582252606 | 1           | AC092969.1 |
| ENSG00000287230 | 0.909952655 | 0           | 2.19733956   | 0.582252606 | 1           | AC120194.1 |
| ENSG00000258754 | 0.909952655 | 0           | 2.19733956   | 0.582252606 | 1           | LINC01579  |
| ENSG00000262488 | 0.909952655 | 0           | 2.19733956   | 0.582252606 | 1           | AC133065.2 |
| ENSG00000250325 | 0.909952655 | 0           | 2.19733956   | 0.582252606 | 1           | IGBP1P4    |
| ENSG00000279020 | 0.909952655 | 0           | 2.19733956   | 0.582252606 | 1           | C18orf15   |
| ENSG00000253336 | 0.909952655 | 0           | 2.19733956   | 0.582252606 | 1           | AC018992.1 |
| ENSG00000255462 | 0.909952655 | 0           | 2.19733956   | 0.582252606 | 1           | AC104031.1 |
| ENSG00000271366 | 0.909952655 | 0           | 2.19733956   | 0.582252606 | 1           | AC002128.2 |
| ENSG00000211625 | 0.909952655 | 0           | 2.19733956   | 0.582252606 | 1           | IGKV3D-20  |
| ENSG00000229195 | 0.909952655 | 0           | 2.19733956   | 0.582252606 | 1           | AC009495.1 |
| ENSG00000286734 | 0.909952655 | 0           | 2.19733956   | 0.582252606 | 1           | AC133530.1 |
| ENSG00000259351 | 0.909952655 | 0           | 2.19733956   | 0.582252606 | 1           | AC015914.1 |
| ENSG00000275405 | 0.909952655 | 0           | 2.19733956   | 0.582252606 | 1           | RF00003    |
| ENSG00000230482 | 0.909952655 | 0           | 2.19733956   | 0.582252606 | 1           | ATP5MC2P3  |
| ENSG00000203498 | 0.909952655 | 0           | 2.19733956   | 0.582252606 | 1           | AL139390.1 |
| ENSG00000212127 | 0.909952655 | 0           | 2.19733956   | 0.582252606 | 1           | TAS2R14    |
| ENSG00000285020 | 0.909952655 | 0           | 2.19733956   | 0.582252606 | 1           | AC020765.5 |
| ENSG00000287443 | 0.909952655 | 0           | 2.19733956   | 0.582252606 | 1           | AL357558.3 |
| ENSG00000182566 | 0.909952655 | 0           | 2.19733956   | 0.582252606 | 1           | CLEC4G     |
| ENSG00000231586 | 0.909952655 | 0           | 2.19733956   | 0.582252606 | 1           | RPS23P9    |
| ENSG00000279465 | 0.909952655 | 0           | 2.19733956   | 0.582252606 | 1           | AC090950.2 |
| ENSG00000244623 | 0.909952655 | 0           | 2.19733956   | 0.582252606 | 1           | OR2AE1     |
| ENSG00000254357 | 0.909952655 | 0           | 2.19733956   | 0.582252606 | 1           | AC090200.1 |
| ENSG00000238300 | 0.909952655 | 0           | 2.19733956   | 0.582252606 | 1           | SNORD121B  |
| ENSG00000206596 | 0.909952655 | 0           | 2.19733956   | 0.582252606 | 1           | RNU1-27P   |
| ENSG00000274198 | 0.909952655 | 0           | 2.19733956   | 0.582252606 | 1           | AC025521.1 |
| ENSG00000255811 | 0.909952655 | 0           | 2.19733956   | 0.582252606 | 1           | AL121988.1 |
| ENSG00000224691 | 0.909952655 | 0           | 2.19733956   | 0.582252606 | 1           | AL133553.1 |
| ENSG00000200241 | 0.909952655 | 0           | 2.19733956   | 0.582252606 | 1           | RF00019    |

|                 |             |             |              |             |             |            |
|-----------------|-------------|-------------|--------------|-------------|-------------|------------|
| ENSG00000281780 | 0.909952655 | 0           | 2.19733956   | 0.582252606 | 1           | RF00134    |
| ENSG00000240477 | 0.909952655 | 0           | 2.19733956   | 0.582252606 | 1           | AC022494.1 |
| ENSG00000287286 | 0.909952655 | 0           | 2.19733956   | 0.582252606 | 1           | AC024560.5 |
| ENSG00000250582 | 0.909952655 | 0           | 2.19733956   | 0.582252606 | 1           | SMAD1-AS2  |
| ENSG00000279698 | 0.909952655 | 0           | 2.19733956   | 0.582252606 | 1           | AC027335.2 |
| ENSG00000246422 | 0.909952655 | 0           | 2.19733956   | 0.582252606 | 1           | AC008781.2 |
| ENSG00000270050 | 0.909952655 | 0           | 2.19733956   | 0.582252606 | 1           | AL035427.1 |
| ENSG00000252864 | 0.909952655 | 0           | 2.19733956   | 0.582252606 | 1           | RNA5SP278  |
| ENSG00000280035 | 0.909952655 | 0           | 2.19733956   | 0.582252606 | 1           | AC011676.5 |
| ENSG00000255774 | 0.909952655 | 0           | 2.19733956   | 0.582252606 | 1           | AP000439.2 |
| ENSG00000224077 | 0.909952655 | 0           | 2.19733956   | 0.582252606 | 1           | AP000936.1 |
| ENSG00000255163 | 0.909952655 | 0           | 2.19733956   | 0.582252606 | 1           | HSPE1P18   |
| ENSG00000261401 | 0.909952655 | 0           | 2.19733956   | 0.582252606 | 1           | AC091304.3 |
| ENSG00000287741 | 0.909952655 | 0           | 2.19733956   | 0.582252606 | 1           | AC009434.1 |
| ENSG00000260660 | 0.909952655 | 0           | 2.19733956   | 0.582252606 | 1           | AC113208.2 |
| ENSG00000258676 | 0.909952655 | 0           | 2.19733956   | 0.582252606 | 1           | AC091544.2 |
| ENSG00000136488 | 0.909952655 | 0           | 2.19733956   | 0.582252606 | 1           | CSH1       |
| ENSG00000264272 | 0.909952655 | 0           | 2.19733956   | 0.582252606 | 1           | AC100786.2 |
| ENSG00000269681 | 0.909952655 | 0           | 2.19733956   | 0.582252606 | 1           | AC063977.7 |
| ENSG00000099715 | 0.909952655 | 0           | 2.19733956   | 0.582252606 | 1           | PCDH11Y    |
| ENSG00000165376 | 2.639167628 | 0.774441189 | 1.789903286  | 0.582259817 | 0.693580868 | CLDN2      |
| ENSG00000285399 | 16.27849953 | 12.82111474 | 0.342616068  | 0.582399947 | 0.693715983 | AC104162.2 |
| ENSG00000236717 | 1.188078446 | 0.387220594 | 1.624257869  | 0.582519446 | 1           | AL354751.2 |
| ENSG00000173662 | 1.188078446 | 0.387220594 | 1.624257869  | 0.582519446 | 1           | TAS1R1     |
| ENSG00000222222 | 1.188078446 | 0.387220594 | 1.624257869  | 0.582519446 | 1           | RNU2-17P   |
| ENSG00000258980 | 1.188078446 | 0.387220594 | 1.624257869  | 0.582519446 | 1           | EIF1AXP2   |
| ENSG00000286424 | 1.188078446 | 0.387220594 | 1.624257869  | 0.582519446 | 1           | AL157996.2 |
| ENSG00000167969 | 865.9463465 | 778.3443796 | 0.153443981  | 0.582548881 | 0.693839364 | ECH1       |
| ENSG00000152760 | 36.74894432 | 50.57420625 | -0.461996887 | 0.582574481 | 0.693839364 | TCTEX1D1   |
| ENSG00000160200 | 338.6799976 | 254.2865973 | 0.414196513  | 0.582602866 | 0.693839364 | CBS        |
| ENSG00000261716 | 49.26477495 | 56.96875727 | -0.207877912 | 0.582610353 | 0.693839364 | HIST2H2BC  |
| ENSG00000272822 | 0.615458159 | 1.782695063 | -1.541494609 | 0.582849256 | 1           | AC073610.2 |
| ENSG00000249412 | 1.186824798 | 0.387220594 | 1.622951044  | 0.582860674 | 1           | AC010285.1 |
| ENSG00000228702 | 1.186824798 | 0.387220594 | 1.622951044  | 0.582860674 | 1           | AL645998.1 |
| ENSG00000182585 | 1.186824798 | 0.387220594 | 1.622951044  | 0.582860674 | 1           | EPGN       |
| ENSG00000251405 | 1.186824798 | 0.387220594 | 1.622951044  | 0.582860674 | 1           | AC016571.1 |
| ENSG00000249012 | 1.186824798 | 0.387220594 | 1.622951044  | 0.582860674 | 1           | AC104819.1 |
| ENSG00000235849 | 0.907445357 | 0           | 2.193730987  | 0.582892844 | 1           | HS6ST2-AS1 |
| ENSG00000270154 | 0.907445357 | 0           | 2.193730987  | 0.582892844 | 1           | AC130352.1 |
| novel.261       | 0.907445357 | 0           | 2.193730987  | 0.582892844 | 1           | -          |
| ENSG00000230970 | 0.907445357 | 0           | 2.193730987  | 0.582892844 | 1           | HHATL-AS1  |
| ENSG00000256582 | 0.907445357 | 0           | 2.193730987  | 0.582892844 | 1           | LINC02390  |
| ENSG00000264914 | 0.907445357 | 0           | 2.193730987  | 0.582892844 | 1           | AC015845.1 |
| ENSG00000250869 | 0.907445357 | 0           | 2.193730987  | 0.582892844 | 1           | AC087359.1 |
| ENSG00000269945 | 0.907445357 | 0           | 2.193730987  | 0.582892844 | 1           | AC004817.4 |
| ENSG00000259380 | 0.907445357 | 0           | 2.193730987  | 0.582892844 | 1           | AC087473.1 |
| ENSG00000265369 | 0.907445357 | 0           | 2.193730987  | 0.582892844 | 1           | PCAT18     |
| ENSG00000231782 | 0.907445357 | 0           | 2.193730987  | 0.582892844 | 1           | LINC00575  |
| ENSG00000250726 | 0.907445357 | 0           | 2.193730987  | 0.582892844 | 1           | AC107222.1 |
| ENSG00000113600 | 0.907445357 | 0           | 2.193730987  | 0.582892844 | 1           | C9         |
| ENSG00000258780 | 0.907445357 | 0           | 2.193730987  | 0.582892844 | 1           | BMS1P15    |



|                 |             |             |              |             |             |             |
|-----------------|-------------|-------------|--------------|-------------|-------------|-------------|
| ENSG00000265987 | 0.907445357 | 0           | 2.193730987  | 0.582892844 | 1           | AC011933.4  |
| ENSG00000215812 | 0.907445357 | 0           | 2.193730987  | 0.582892844 | 1           | ZNF847P     |
| ENSG00000231386 | 0.907445357 | 0           | 2.193730987  | 0.582892844 | 1           | AC007395.1  |
| ENSG00000285952 | 0.907445357 | 0           | 2.193730987  | 0.582892844 | 1           | AC020663.4  |
| ENSG00000275358 | 0.907445357 | 0           | 2.193730987  | 0.582892844 | 1           | AL080312.2  |
| ENSG00000187733 | 0.907445357 | 0           | 2.193730987  | 0.582892844 | 1           | AMY1C       |
| ENSG00000227962 | 0.907445357 | 0           | 2.193730987  | 0.582892844 | 1           | AL391994.1  |
| ENSG00000287026 | 0.907445357 | 0           | 2.193730987  | 0.582892844 | 1           | AC068616.2  |
| ENSG00000197585 | 0.907445357 | 0           | 2.193730987  | 0.582892844 | 1           | AC068051.1  |
| ENSG00000240809 | 0.907445357 | 0           | 2.193730987  | 0.582892844 | 1           | AC026877.1  |
| ENSG00000250189 | 0.907445357 | 0           | 2.193730987  | 0.582892844 | 1           | AC097504.1  |
| ENSG00000204930 | 0.907445357 | 0           | 2.193730987  | 0.582892844 | 1           | FAM221B     |
| ENSG00000286344 | 0.907445357 | 0           | 2.193730987  | 0.582892844 | 1           | AL357127.2  |
| ENSG00000263657 | 0.907445357 | 0           | 2.193730987  | 0.582892844 | 1           | AC023389.1  |
| ENSG00000226229 | 0.907445357 | 0           | 2.193730987  | 0.582892844 | 1           | RPLP0P1     |
| ENSG00000239210 | 0.907445357 | 0           | 2.193730987  | 0.582892844 | 1           | RPS26P55    |
| ENSG00000232736 | 0.907445357 | 0           | 2.193730987  | 0.582892844 | 1           | AC007551.1  |
| ENSG00000270764 | 0.907445357 | 0           | 2.193730987  | 0.582892844 | 1           | AC005070.1  |
| ENSG00000253516 | 0.907445357 | 0           | 2.193730987  | 0.582892844 | 1           | HMGB1P41    |
| ENSG00000230729 | 0.907445357 | 0           | 2.193730987  | 0.582892844 | 1           | AL160270.1  |
| ENSG00000257746 | 0.907445357 | 0           | 2.193730987  | 0.582892844 | 1           | AC138123.2  |
| ENSG00000237749 | 0.907445357 | 0           | 2.193730987  | 0.582892844 | 1           | AL034379.1  |
| ENSG00000223920 | 0.907445357 | 0           | 2.193730987  | 0.582892844 | 1           | AC099791.1  |
| ENSG00000244399 | 0.907445357 | 0           | 2.193730987  | 0.582892844 | 1           | RN7SL251P   |
| ENSG00000240935 | 0.907445357 | 0           | 2.193730987  | 0.582892844 | 1           | PLGLA       |
| ENSG00000217289 | 0.907445357 | 0           | 2.193730987  | 0.582892844 | 1           | AC079776.1  |
| ENSG00000228351 | 0.907445357 | 0           | 2.193730987  | 0.582892844 | 1           | AC018832.1  |
| ENSG00000239994 | 0.907445357 | 0           | 2.193730987  | 0.582892844 | 1           | AC069444.1  |
| ENSG00000217767 | 0.907445357 | 0           | 2.193730987  | 0.582892844 | 1           | NDUFAB1P1   |
| ENSG00000231490 | 0.907445357 | 0           | 2.193730987  | 0.582892844 | 1           | RPL7L1P2    |
| ENSG00000255203 | 0.907445357 | 0           | 2.193730987  | 0.582892844 | 1           | OR7E2P      |
| ENSG00000230575 | 0.907445357 | 0           | 2.193730987  | 0.582892844 | 1           | AC013286.1  |
| ENSG00000237585 | 0.907445357 | 0           | 2.193730987  | 0.582892844 | 1           | LINC00407   |
| ENSG00000265450 | 0.907445357 | 0           | 2.193730987  | 0.582892844 | 1           | MIR4502     |
| ENSG00000206768 | 0.907445357 | 0           | 2.193730987  | 0.582892844 | 1           | RF00019     |
| ENSG00000256338 | 0.907445357 | 0           | 2.193730987  | 0.582892844 | 1           | RPL41P2     |
| ENSG00000285597 | 0.907445357 | 0           | 2.193730987  | 0.582892844 | 1           | AC051619.10 |
| ENSG00000275411 | 0.907445357 | 0           | 2.193730987  | 0.582892844 | 1           | MIR6882     |
| ENSG00000261457 | 0.907445357 | 0           | 2.193730987  | 0.582892844 | 1           | AC002519.2  |
| ENSG00000244229 | 0.907445357 | 0           | 2.193730987  | 0.582892844 | 1           | RPL26P35    |
| ENSG00000230321 | 0.907445357 | 0           | 2.193730987  | 0.582892844 | 1           | MTCO2P27    |
| ENSG00000236119 | 0.907445357 | 0           | 2.193730987  | 0.582892844 | 1           | AP000688.3  |
| ENSG00000280347 | 33.9463031  | 42.35814061 | -0.318267687 | 0.5830614   | 0.694256339 | AC000123.3  |
| ENSG00000198728 | 1299.636462 | 1467.256557 | -0.174772027 | 0.583061775 | 0.694256339 | LDB1        |
| ENSG00000215347 | 5.808402407 | 3.72941052  | 0.65180228   | 0.583085977 | 0.694256339 | SLC25A5P1   |
| ENSG00000135502 | 2.756327131 | 4.33153058  | -0.654886132 | 0.583093429 | 0.694256339 | SLC26A10    |
| ENSG00000105136 | 189.9865726 | 169.2750581 | 0.166020019  | 0.58309409  | 0.694256339 | ZNF419      |
| ENSG00000257207 | 1.845120827 | 3.780161198 | -1.030126697 | 0.583215764 | 0.694369388 | AC112229.3  |
| ENSG00000273584 | 1.535511275 | 0.387220594 | 1.989302076  | 0.583406108 | 1           | AC096708.3  |
| ENSG00000271278 | 1.535511275 | 0.387220594 | 1.989302076  | 0.583406108 | 1           | ELOCP33     |
| ENSG00000246130 | 5.089646153 | 3.139187216 | 0.688129658  | 0.583450135 | 0.694616595 | AC107959.2  |

|                 |             |             |              |             |             |            |
|-----------------|-------------|-------------|--------------|-------------|-------------|------------|
| ENSG00000230989 | 2631.558487 | 2430.612407 | 0.114663883  | 0.583516929 | 0.694657789 | HSBP1      |
| ENSG00000120137 | 1244.731287 | 1153.222629 | 0.110224091  | 0.583538211 | 0.694657789 | PANK3      |
| ENSG00000233538 | 0.308355904 | 1.029478846 | -1.672380526 | 0.583568996 | 1           | AC017104.3 |
| ENSG00000221406 | 0.308355904 | 1.029478846 | -1.672380526 | 0.583568996 | 1           | MIR320B2   |
| ENSG00000254539 | 0.308355904 | 1.029478846 | -1.672380526 | 0.583568996 | 1           | AC239804.1 |
| ENSG00000261635 | 0.308355904 | 1.029478846 | -1.672380526 | 0.583568996 | 1           | AC103988.1 |
| ENSG00000217325 | 0.307102255 | 1.029478846 | -1.672374649 | 0.583663914 | 1           | PRELID1P1  |
| ENSG00000231210 | 0.307102255 | 1.029478846 | -1.672374649 | 0.583663914 | 1           | LINC01510  |
| ENSG00000207737 | 0.307102255 | 1.029478846 | -1.672374649 | 0.583663914 | 1           | MIR181B2   |
| ENSG00000280242 | 0.307102255 | 1.029478846 | -1.672374649 | 0.583663914 | 1           | AL450226.2 |
| ENSG00000286863 | 6.665488001 | 4.566499142 | 0.535689849  | 0.5838246   | 0.694966871 | AL513166.2 |
| ENSG00000232489 | 1.541779519 | 0.356539013 | 1.994797908  | 0.583846889 | 1           | MFAP1P1    |
| ENSG00000237934 | 0.894837599 | 2.038888596 | -1.19543141  | 0.583862971 | 0.69497991  | AL590729.1 |
| ENSG00000174808 | 10.97996336 | 8.285297177 | 0.405627886  | 0.583889053 | 0.69497991  | BTC        |
| ENSG00000130159 | 530.8079503 | 481.8121976 | 0.140273115  | 0.583977492 | 0.695053334 | ECSIT      |
| ENSG00000252915 | 3.916682763 | 2.221822211 | 0.831679885  | 0.58401458  | 0.695065635 | RF00019    |
| ENSG00000274698 | 4.557356438 | 2.679862578 | 0.78897343   | 0.584195743 | 0.695249397 | AC099521.1 |
| ENSG00000049249 | 10.12413141 | 6.705733218 | 0.587574143  | 0.584291463 | 0.695331463 | TNFRSF9    |
| ENSG00000139971 | 96.16914881 | 121.727236  | -0.338708282 | 0.584359877 | 0.695381027 | ARMH4      |
| ENSG00000252244 | 1.188078446 | 0.356539013 | 1.624216735  | 0.584434596 | 1           | RNU7-3P    |
| ENSG00000253687 | 1.188078446 | 0.356539013 | 1.624216735  | 0.584434596 | 1           | AC008456.1 |
| ENSG00000228149 | 1.188078446 | 0.356539013 | 1.624216735  | 0.584434596 | 1           | RPL3P1     |
| ENSG00000255329 | 1.188078446 | 0.356539013 | 1.624216735  | 0.584434596 | 1           | H2AFZP4    |
| ENSG00000231409 | 1.188078446 | 0.356539013 | 1.624216735  | 0.584434596 | 1           | AC018868.1 |
| ENSG00000275582 | 19.38476679 | 23.80531611 | -0.299704384 | 0.584449831 | 0.695456217 | AL031670.1 |
| ENSG00000183647 | 59.72616746 | 69.52345117 | -0.22168365  | 0.584489817 | 0.695471946 | ZNF530     |
| ENSG00000266677 | 0.600343103 | 1.447381022 | -1.262234711 | 0.584559149 | 1           | AC087164.1 |
| ENSG00000264270 | 0.600343103 | 1.447381022 | -1.262234711 | 0.584559149 | 1           | AC087749.1 |
| ENSG00000172901 | 10.36708377 | 7.316025618 | 0.507511204  | 0.58460528  | 0.695544504 | LVRN       |
| novel.290       | 2.11063886  | 1.130980201 | 0.930521466  | 0.584605974 | 0.695544504 | -          |
| ENSG00000176225 | 281.6010026 | 327.165804  | -0.215914335 | 0.584633819 | 0.695544504 | RTTN       |
| ENSG00000133818 | 911.8741254 | 839.0950831 | 0.119695976  | 0.584696237 | 0.695544504 | RRAS2      |
| ENSG00000152454 | 72.10184564 | 63.58488588 | 0.179820677  | 0.584704185 | 0.695544504 | ZNF256     |
| ENSG00000189398 | 19.98196186 | 33.56623574 | -0.746688241 | 0.584711424 | 0.695544504 | ORTE12P    |
| ENSG00000282308 | 0.293240848 | 1.029478846 | -1.672309457 | 0.584719063 | 1           | DPRXP3     |
| ENSG00000234841 | 0.293240848 | 1.029478846 | -1.672309457 | 0.584719063 | 1           | AC017007.2 |
| ENSG00000257957 | 0.293240848 | 1.029478846 | -1.672309457 | 0.584719063 | 1           | QRSL1P3    |
| ENSG00000252157 | 0.293240848 | 1.029478846 | -1.672309457 | 0.584719063 | 1           | RNU6-479P  |
| ENSG00000282977 | 0.293240848 | 1.029478846 | -1.672309457 | 0.584719063 | 1           | PCBP2-OT1  |
| ENSG00000215515 | 0.293240848 | 1.029478846 | -1.672309457 | 0.584719063 | 1           | IFIT1P1    |
| ENSG00000139908 | 0.293240848 | 1.029478846 | -1.672309457 | 0.584719063 | 1           | TSSK4      |
| ENSG00000266369 | 0.293240848 | 1.029478846 | -1.672309457 | 0.584719063 | 1           | AC090774.2 |
| ENSG00000273712 | 1.186824798 | 0.356539013 | 1.622907482  | 0.584777179 | 1           | AL021997.2 |
| ENSG00000252436 | 1.186824798 | 0.356539013 | 1.622907482  | 0.584777179 | 1           | RF00019    |
| ENSG00000248696 | 1.186824798 | 0.356539013 | 1.622907482  | 0.584777179 | 1           | AC011406.1 |
| ENSG00000277741 | 2.052685933 | 0.723690511 | 1.51150002   | 0.584782867 | 0.695575351 | GOLGA6L17P |
| ENSG00000132881 | 69.45544085 | 84.09778244 | -0.278538504 | 0.584804047 | 0.695575351 | CPLANE2    |
| ENSG00000112304 | 343.5319877 | 380.2095628 | -0.146917942 | 0.584849382 | 0.695575351 | ACOT13     |
| ENSG00000148516 | 1558.226846 | 1227.486687 | 0.344194855  | 0.584866259 | 0.695575351 | ZEB1       |
| ENSG00000162391 | 5.056908743 | 2.944356846 | 0.79146742   | 0.584871218 | 0.695575351 | FAM151A    |
| ENSG00000118960 | 785.5097473 | 693.5243755 | 0.180140268  | 0.584978641 | 0.69558227  | HS1BP3     |

|                 |             |             |              |             |             |            |
|-----------------|-------------|-------------|--------------|-------------|-------------|------------|
| ENSG00000247157 | 22.44944983 | 30.54720631 | -0.440575201 | 0.584982022 | 0.69558227  | LINC01252  |
| ENSG00000213985 | 4.912311159 | 7.458949435 | -0.609312019 | 0.584988611 | 0.69558227  | AC078899.1 |
| ENSG00000219565 | 3.308817768 | 1.823989131 | 0.867743648  | 0.585007694 | 0.69558227  | ZNF259P1   |
| ENSG00000277423 | 5.411863464 | 3.607840069 | 0.589853368  | 0.585010899 | 0.69558227  | AC069234.5 |
| ENSG00000273619 | 37.04128752 | 44.01558799 | -0.248319718 | 0.585100518 | 0.695648343 | AL121832.2 |
| ENSG00000230783 | 1.535511275 | 0.356539013 | 1.989315051  | 0.585111306 | 1           | AC009961.3 |
| ENSG00000250237 | 1.535511275 | 0.356539013 | 1.989315051  | 0.585111306 | 1           | AC010273.2 |
| ENSG00000253540 | 39.45770372 | 33.01144591 | 0.25528481   | 0.58512002  | 0.695648343 | FAM86HP    |
| ENSG00000236478 | 0.909952655 | 1.823989131 | -0.998014774 | 0.58518112  | 0.695689149 | AC012513.2 |
| ENSG00000286922 | 0           | 0.774441189 | -2.198930232 | 0.585292454 | 1           | AC068787.2 |
| ENSG00000184270 | 0           | 0.774441189 | -2.198930232 | 0.585292454 | 1           | HIST2H2AB  |
| ENSG00000271926 | 0           | 0.774441189 | -2.198930232 | 0.585292454 | 1           | AC008972.1 |
| ENSG00000248132 | 0           | 0.774441189 | -2.198930232 | 0.585292454 | 1           | LINC02101  |
| ENSG00000141316 | 0           | 0.774441189 | -2.198930232 | 0.585292454 | 1           | SPACA3     |
| ENSG00000259294 | 0           | 0.774441189 | -2.198930232 | 0.585292454 | 1           | AC005096.1 |
| ENSG00000226186 | 0           | 0.774441189 | -2.198930232 | 0.585292454 | 1           | ELOCP21    |
| ENSG00000252376 | 0           | 0.774441189 | -2.198930232 | 0.585292454 | 1           | RNA5SP395  |
| ENSG00000234159 | 0           | 0.774441189 | -2.198930232 | 0.585292454 | 1           | RBPMSLP    |
| ENSG00000202379 | 0           | 0.774441189 | -2.198930232 | 0.585292454 | 1           | RF00156    |
| ENSG00000235535 | 0           | 0.774441189 | -2.198930232 | 0.585292454 | 1           | TRDN-AS1   |
| ENSG00000237738 | 0           | 0.774441189 | -2.198930232 | 0.585292454 | 1           | RNF216-IT1 |
| ENSG00000279243 | 0           | 0.774441189 | -2.198930232 | 0.585292454 | 1           | AP000769.3 |
| ENSG00000257658 | 0           | 0.774441189 | -2.198930232 | 0.585292454 | 1           | AC004217.2 |
| ENSG00000255192 | 0           | 0.774441189 | -2.198930232 | 0.585292454 | 1           | NANOGP8    |
| ENSG00000243491 | 0           | 0.774441189 | -2.198930232 | 0.585292454 | 1           | AC082651.3 |
| ENSG00000229781 | 0           | 0.774441189 | -2.198930232 | 0.585292454 | 1           | AC013444.1 |
| ENSG00000228222 | 0           | 0.774441189 | -2.198930232 | 0.585292454 | 1           | AC073050.1 |
| ENSG00000275930 | 0           | 0.774441189 | -2.198930232 | 0.585292454 | 1           | RF00019    |
| ENSG00000257336 | 0           | 0.774441189 | -2.198930232 | 0.585292454 | 1           | PRELID2P1  |
| ENSG00000261330 | 0           | 0.774441189 | -2.198930232 | 0.585292454 | 1           | PPIAP50    |
| ENSG00000266950 | 0           | 0.774441189 | -2.198930232 | 0.585292454 | 1           | AC008752.1 |
| ENSG00000188425 | 0           | 0.774441189 | -2.198930232 | 0.585292454 | 1           | NANOS2     |
| ENSG00000228719 | 0           | 0.774441189 | -2.198930232 | 0.585292454 | 1           | AL022313.2 |
| ENSG00000226320 | 0           | 0.774441189 | -2.198930232 | 0.585292454 | 1           | LINC01811  |
| ENSG00000219902 | 0           | 0.774441189 | -2.198930232 | 0.585292454 | 1           | RPL35P3    |
| ENSG00000230533 | 0           | 0.774441189 | -2.198930232 | 0.585292454 | 1           | AL356234.2 |
| ENSG00000277127 | 0           | 0.774441189 | -2.198930232 | 0.585292454 | 1           | RF00017    |
| ENSG00000254331 | 0           | 0.774441189 | -2.198930232 | 0.585292454 | 1           | CKS1BP7    |
| ENSG00000231804 | 0           | 0.774441189 | -2.198930232 | 0.585292454 | 1           | AL353748.1 |
| ENSG00000151631 | 0           | 0.774441189 | -2.198930232 | 0.585292454 | 1           | AKR1C6P    |
| ENSG00000260029 | 0           | 0.774441189 | -2.198930232 | 0.585292454 | 1           | AC007608.2 |
| ENSG00000266761 | 0           | 0.774441189 | -2.198930232 | 0.585292454 | 1           | MIR3194    |
| ENSG00000228176 | 0           | 0.774441189 | -2.198930232 | 0.585292454 | 1           | AC092265.1 |
| ENSG00000276645 | 0           | 0.774441189 | -2.198930232 | 0.585292454 | 1           | RF00017    |
| ENSG00000226324 | 0           | 0.774441189 | -2.198930232 | 0.585292454 | 1           | AL358453.1 |
| ENSG00000207975 | 0           | 0.774441189 | -2.198930232 | 0.585292454 | 1           | MIR181B1   |
| ENSG00000251230 | 0           | 0.774441189 | -2.198930232 | 0.585292454 | 1           | MIR3945HG  |
| ENSG00000214561 | 0           | 0.774441189 | -2.198930232 | 0.585292454 | 1           | RBBP4P4    |
| ENSG00000196970 | 0           | 0.774441189 | -2.198930232 | 0.585292454 | 1           | NXF4       |
| ENSG00000178462 | 0           | 0.774441189 | -2.198930232 | 0.585292454 | 1           | TUBAL3     |
| ENSG00000277981 | 0           | 0.774441189 | -2.198930232 | 0.585292454 | 1           | AL731556.2 |

|                 |   |             |              |             |   |            |
|-----------------|---|-------------|--------------|-------------|---|------------|
| ENSG00000256159 | 0 | 0.774441189 | -2.198930232 | 0.585292454 | 1 | AC022080.3 |
| ENSG00000175336 | 0 | 0.774441189 | -2.198930232 | 0.585292454 | 1 | APOF       |
| ENSG00000184502 | 0 | 0.774441189 | -2.198930232 | 0.585292454 | 1 | GAST       |
| ENSG00000272383 | 0 | 0.774441189 | -2.198930232 | 0.585292454 | 1 | AC006270.3 |
| ENSG00000260500 | 0 | 0.774441189 | -2.198930232 | 0.585292454 | 1 | AC010336.2 |
| ENSG00000142619 | 0 | 0.774441189 | -2.198930232 | 0.585292454 | 1 | PADI3      |
| ENSG00000215899 | 0 | 0.774441189 | -2.198930232 | 0.585292454 | 1 | AC209007.1 |
| ENSG00000240374 | 0 | 0.774441189 | -2.198930232 | 0.585292454 | 1 | RN7SL503P  |
| ENSG00000235358 | 0 | 0.774441189 | -2.198930232 | 0.585292454 | 1 | AC093151.3 |
| ENSG00000212624 | 0 | 0.774441189 | -2.198930232 | 0.585292454 | 1 | RF00568    |
| ENSG00000226446 | 0 | 0.774441189 | -2.198930232 | 0.585292454 | 1 | NOTCH2P1   |
| ENSG00000252105 | 0 | 0.774441189 | -2.198930232 | 0.585292454 | 1 | RNU1-143P  |
| ENSG00000203785 | 0 | 0.774441189 | -2.198930232 | 0.585292454 | 1 | SPRR2E     |
| ENSG00000207082 | 0 | 0.774441189 | -2.198930232 | 0.585292454 | 1 | RNU6-171P  |
| ENSG00000201987 | 0 | 0.774441189 | -2.198930232 | 0.585292454 | 1 | RF00019    |
| ENSG00000233562 | 0 | 0.774441189 | -2.198930232 | 0.585292454 | 1 | AL356981.1 |
| ENSG00000224763 | 0 | 0.774441189 | -2.198930232 | 0.585292454 | 1 | FDPSP8     |
| ENSG00000213729 | 0 | 0.774441189 | -2.198930232 | 0.585292454 | 1 | AC098828.1 |
| ENSG00000278766 | 0 | 0.774441189 | -2.198930232 | 0.585292454 | 1 | AC092683.2 |
| ENSG00000287149 | 0 | 0.774441189 | -2.198930232 | 0.585292454 | 1 | AC092640.1 |
| ENSG00000271852 | 0 | 0.774441189 | -2.198930232 | 0.585292454 | 1 | SNORD11B   |
| ENSG00000237542 | 0 | 0.774441189 | -2.198930232 | 0.585292454 | 1 | MTCO3P17   |
| ENSG00000228380 | 0 | 0.774441189 | -2.198930232 | 0.585292454 | 1 | MYL6BP1    |
| ENSG00000227981 | 0 | 0.774441189 | -2.198930232 | 0.585292454 | 1 | AC012668.1 |
| ENSG00000275458 | 0 | 0.774441189 | -2.198930232 | 0.585292454 | 1 | MIR6809    |
| ENSG00000231802 | 0 | 0.774441189 | -2.198930232 | 0.585292454 | 1 | AC009502.2 |
| ENSG00000229271 | 0 | 0.774441189 | -2.198930232 | 0.585292454 | 1 | AC091493.1 |
| ENSG00000163825 | 0 | 0.774441189 | -2.198930232 | 0.585292454 | 1 | RTP3       |
| ENSG00000240708 | 0 | 0.774441189 | -2.198930232 | 0.585292454 | 1 | LINC02030  |
| ENSG00000242244 | 0 | 0.774441189 | -2.198930232 | 0.585292454 | 1 | ATP5MC1P3  |
| ENSG00000233441 | 0 | 0.774441189 | -2.198930232 | 0.585292454 | 1 | CYP2AB1P   |
| ENSG00000250723 | 0 | 0.774441189 | -2.198930232 | 0.585292454 | 1 | AC016687.2 |
| ENSG00000271958 | 0 | 0.774441189 | -2.198930232 | 0.585292454 | 1 | AC021860.1 |
| ENSG00000248143 | 0 | 0.774441189 | -2.198930232 | 0.585292454 | 1 | LINC02383  |
| ENSG00000250180 | 0 | 0.774441189 | -2.198930232 | 0.585292454 | 1 | AC074344.2 |
| ENSG00000280449 | 0 | 0.774441189 | -2.198930232 | 0.585292454 | 1 | AC034229.6 |
| ENSG00000249484 | 0 | 0.774441189 | -2.198930232 | 0.585292454 | 1 | LINC01470  |
| ENSG00000182613 | 0 | 0.774441189 | -2.198930232 | 0.585292454 | 1 | OR2V2      |
| ENSG00000233503 | 0 | 0.774441189 | -2.198930232 | 0.585292454 | 1 | HNRNPLP1   |
| ENSG00000187475 | 0 | 0.774441189 | -2.198930232 | 0.585292454 | 1 | HIST1H1T   |
| ENSG00000273703 | 0 | 0.774441189 | -2.198930232 | 0.585292454 | 1 | HIST1H2BM  |
| ENSG00000224995 | 0 | 0.774441189 | -2.198930232 | 0.585292454 | 1 | LINC01526  |
| ENSG00000218803 | 0 | 0.774441189 | -2.198930232 | 0.585292454 | 1 | GSTM2P1    |
| ENSG00000218208 | 0 | 0.774441189 | -2.198930232 | 0.585292454 | 1 | RPS27AP11  |
| ENSG00000233219 | 0 | 0.774441189 | -2.198930232 | 0.585292454 | 1 | AC008080.3 |
| ENSG00000202472 | 0 | 0.774441189 | -2.198930232 | 0.585292454 | 1 | RNA5SP248  |
| ENSG00000224294 | 0 | 0.774441189 | -2.198930232 | 0.585292454 | 1 | PINCR      |
| ENSG00000228354 | 0 | 0.774441189 | -2.198930232 | 0.585292454 | 1 | AL450023.1 |
| ENSG00000224208 | 0 | 0.774441189 | -2.198930232 | 0.585292454 | 1 | AL590762.3 |
| ENSG00000226056 | 0 | 0.774441189 | -2.198930232 | 0.585292454 | 1 | MTND4P32   |
| ENSG00000229794 | 0 | 0.774441189 | -2.198930232 | 0.585292454 | 1 | MTCYBP32   |

|                 |             |             |              |             |             |             |
|-----------------|-------------|-------------|--------------|-------------|-------------|-------------|
| ENSG00000229562 | 0           | 0.774441189 | -2.198930232 | 0.585292454 | 1           | ZFYVE9P1    |
| ENSG00000253500 | 0           | 0.774441189 | -2.198930232 | 0.585292454 | 1           | AF121898.1  |
| ENSG00000229625 | 0           | 0.774441189 | -2.198930232 | 0.585292454 | 1           | AC016877.1  |
| ENSG00000221387 | 0           | 0.774441189 | -2.198930232 | 0.585292454 | 1           | RNU6ATAC8P  |
| ENSG00000243601 | 0           | 0.774441189 | -2.198930232 | 0.585292454 | 1           | RPL12P24    |
| ENSG00000207334 | 0           | 0.774441189 | -2.198930232 | 0.585292454 | 1           | RNU6-12P    |
| ENSG00000253971 | 0           | 0.774441189 | -2.198930232 | 0.585292454 | 1           | CDC42P3     |
| ENSG00000229835 | 0           | 0.774441189 | -2.198930232 | 0.585292454 | 1           | KHSRPP1     |
| ENSG00000252580 | 0           | 0.774441189 | -2.198930232 | 0.585292454 | 1           | RF00322     |
| ENSG00000214888 | 0           | 0.774441189 | -2.198930232 | 0.585292454 | 1           | AL772337.1  |
| ENSG00000265559 | 0           | 0.774441189 | -2.198930232 | 0.585292454 | 1           | RN7SL652P   |
| ENSG00000255028 | 0           | 0.774441189 | -2.198930232 | 0.585292454 | 1           | AP003049.2  |
| ENSG00000239142 | 0           | 0.774441189 | -2.198930232 | 0.585292454 | 1           | RF00096     |
| ENSG00000227683 | 0           | 0.774441189 | -2.198930232 | 0.585292454 | 1           | AL358394.1  |
| ENSG00000270002 | 0           | 0.774441189 | -2.198930232 | 0.585292454 | 1           | AC022028.2  |
| ENSG00000189275 | 0           | 0.774441189 | -2.198930232 | 0.585292454 | 1           | LINC01164   |
| ENSG00000274569 | 0           | 0.774441189 | -2.198930232 | 0.585292454 | 1           | AC024884.1  |
| ENSG00000278399 | 0           | 0.774441189 | -2.198930232 | 0.585292454 | 1           | AC026120.1  |
| ENSG00000257921 | 0           | 0.774441189 | -2.198930232 | 0.585292454 | 1           | AC025165.3  |
| ENSG00000206650 | 0           | 0.774441189 | -2.198930232 | 0.585292454 | 1           | SNORA70G    |
| ENSG00000257329 | 0           | 0.774441189 | -2.198930232 | 0.585292454 | 1           | AC011611.2  |
| ENSG00000258073 | 0           | 0.774441189 | -2.198930232 | 0.585292454 | 1           | AC128657.1  |
| ENSG00000257666 | 0           | 0.774441189 | -2.198930232 | 0.585292454 | 1           | CBX3P5      |
| ENSG00000257715 | 0           | 0.774441189 | -2.198930232 | 0.585292454 | 1           | AC007298.1  |
| ENSG00000200693 | 0           | 0.774441189 | -2.198930232 | 0.585292454 | 1           | RF00012     |
| ENSG00000258793 | 0           | 0.774441189 | -2.198930232 | 0.585292454 | 1           | AL355102.4  |
| ENSG00000250021 | 0           | 0.774441189 | -2.198930232 | 0.585292454 | 1           | ARPIN-AP3S2 |
| ENSG00000258527 | 0           | 0.774441189 | -2.198930232 | 0.585292454 | 1           | ASB9P1      |
| ENSG00000259950 | 0           | 0.774441189 | -2.198930232 | 0.585292454 | 1           | AC034105.3  |
| ENSG00000259992 | 0           | 0.774441189 | -2.198930232 | 0.585292454 | 1           | AC025287.1  |
| ENSG00000287462 | 0           | 0.774441189 | -2.198930232 | 0.585292454 | 1           | AC068442.1  |
| ENSG00000267729 | 0           | 0.774441189 | -2.198930232 | 0.585292454 | 1           | AC010761.7  |
| ENSG00000274621 | 0           | 0.774441189 | -2.198930232 | 0.585292454 | 1           | MIR6867     |
| ENSG00000238704 | 0           | 0.774441189 | -2.198930232 | 0.585292454 | 1           | RNU7-97P    |
| ENSG00000264421 | 0           | 0.774441189 | -2.198930232 | 0.585292454 | 1           | AC007448.2  |
| ENSG00000206863 | 0           | 0.774441189 | -2.198930232 | 0.585292454 | 1           | RNU5A-6P    |
| ENSG00000267112 | 0           | 0.774441189 | -2.198930232 | 0.585292454 | 1           | AC098848.1  |
| ENSG00000232448 | 0           | 0.774441189 | -2.198930232 | 0.585292454 | 1           | AL354824.2  |
| ENSG00000161270 | 0           | 0.774441189 | -2.198930232 | 0.585292454 | 1           | NPHS1       |
| ENSG00000267437 | 0           | 0.774441189 | -2.198930232 | 0.585292454 | 1           | AC012309.2  |
| ENSG00000171570 | 0           | 0.774441189 | -2.198930232 | 0.585292454 | 1           | RAB4B-EGLN2 |
| ENSG00000142025 | 0           | 0.774441189 | -2.198930232 | 0.585292454 | 1           | DMRTC2      |
| ENSG00000105550 | 0           | 0.774441189 | -2.198930232 | 0.585292454 | 1           | FGF21       |
| novel.1108      | 4.286823811 | 6.857985251 | -0.67971472  | 0.585347819 | 0.695855488 | -           |
| ENSG00000188243 | 876.8771627 | 733.2893439 | 0.258104704  | 0.585433585 | 0.695925603 | COMMD6      |
| novel.1052      | 77.73989296 | 50.84700125 | 0.610922993  | 0.585523912 | 0.696001133 | -           |
| ENSG00000259088 | 13.37506752 | 10.38439306 | 0.362759509  | 0.585591888 | 0.696050088 | AL137779.2  |
| ENSG00000271329 | 0.586481695 | 1.41669944  | -1.259861559 | 0.585643708 | 1           | AL035417.2  |
| ENSG00000254900 | 0.586481695 | 1.41669944  | -1.259861559 | 0.585643708 | 1           | AC091053.2  |
| ENSG00000287512 | 1.188078446 | 0.336469917 | 1.624189599  | 0.585707121 | 1           | AC019131.3  |
| ENSG00000092098 | 1.188078446 | 0.336469917 | 1.624189599  | 0.585707121 | 1           | RNF31       |

|                 |             |             |              |             |             |            |
|-----------------|-------------|-------------|--------------|-------------|-------------|------------|
| ENSG00000264279 | 1.188078446 | 0.336469917 | 1.624189599  | 0.585707121 | 1           | MIR4786    |
| ENSG00000236496 | 1.188078446 | 0.336469917 | 1.624189599  | 0.585707121 | 1           | GPS2P1     |
| ENSG00000207186 | 1.188078446 | 0.336469917 | 1.624189599  | 0.585707121 | 1           | RNA5SP122  |
| ENSG00000253712 | 1.188078446 | 0.336469917 | 1.624189599  | 0.585707121 | 1           | AC022274.1 |
| ENSG00000197653 | 1.188078446 | 0.336469917 | 1.624189599  | 0.585707121 | 1           | DNAH10     |
| ENSG00000232140 | 1.188078446 | 0.336469917 | 1.624189599  | 0.585707121 | 1           | AC073257.1 |
| ENSG00000233115 | 1.188078446 | 0.336469917 | 1.624189599  | 0.585707121 | 1           | FAM90A11P  |
| ENSG00000256458 | 1.188078446 | 0.336469917 | 1.624189599  | 0.585707121 | 1           | AC080075.1 |
| ENSG00000243978 | 5.692496553 | 3.280826763 | 0.800904762  | 0.58582771  | 0.696298538 | RTL9       |
| ENSG00000130005 | 564.8735757 | 651.5606135 | -0.205841368 | 0.585939325 | 0.696391274 | GAMT       |
| ENSG00000266850 | 0.61420451  | 1.467450118 | -1.256790372 | 0.5859497   | 1           | AC090912.2 |
| ENSG00000132680 | 972.0171044 | 1056.819776 | -0.120376315 | 0.585959341 | 0.696391274 | KHDC4      |
| ENSG00000163645 | 1.186824798 | 0.336469917 | 1.622878743  | 0.586050612 | 1           | ERICH6     |
| ENSG00000272265 | 1.186824798 | 0.336469917 | 1.622878743  | 0.586050612 | 1           | AC034236.3 |
| ENSG00000247925 | 1.186824798 | 0.336469917 | 1.622878743  | 0.586050612 | 1           | AL139807.1 |
| ENSG00000227159 | 1.186824798 | 0.336469917 | 1.622878743  | 0.586050612 | 1           | DDX11L16   |
| ENSG00000234860 | 1.186824798 | 0.336469917 | 1.622878743  | 0.586050612 | 1           | AL162394.1 |
| ENSG00000147144 | 117.2041934 | 102.5648895 | 0.194910049  | 0.586080057 | 0.696502879 | CCDC120    |
| ENSG00000228050 | 3.312578714 | 1.90542139  | 0.82660938   | 0.586138961 | 0.696541021 | TOP3BP1    |
| ENSG00000185662 | 0.894837599 | 0           | 2.175380757  | 0.586153331 | 1           | SMIM23     |
| ENSG00000250392 | 0.894837599 | 0           | 2.175380757  | 0.586153331 | 1           | LINC02502  |
| ENSG00000220771 | 0.894837599 | 0           | 2.175380757  | 0.586153331 | 1           | BOLA2P3    |
| ENSG00000267503 | 0.894837599 | 0           | 2.175380757  | 0.586153331 | 1           | AP005131.3 |
| ENSG00000274238 | 0.894837599 | 0           | 2.175380757  | 0.586153331 | 1           | AC097478.1 |
| ENSG00000196844 | 0.894837599 | 0           | 2.175380757  | 0.586153331 | 1           | PATE2      |
| ENSG00000232928 | 0.894837599 | 0           | 2.175380757  | 0.586153331 | 1           | DDX3P1     |
| ENSG00000254988 | 0.894837599 | 0           | 2.175380757  | 0.586153331 | 1           | AP002498.1 |
| ENSG00000179141 | 0.894837599 | 0           | 2.175380757  | 0.586153331 | 1           | MTUS2-AS1  |
| ENSG00000206549 | 0.894837599 | 0           | 2.175380757  | 0.586153331 | 1           | PRSS50     |
| ENSG00000248150 | 0.894837599 | 0           | 2.175380757  | 0.586153331 | 1           | LINC02150  |
| ENSG00000259448 | 0.894837599 | 0           | 2.175380757  | 0.586153331 | 1           | LINC02352  |
| ENSG00000285041 | 0.894837599 | 0           | 2.175380757  | 0.586153331 | 1           | AL035412.1 |
| ENSG00000237415 | 0.894837599 | 0           | 2.175380757  | 0.586153331 | 1           | NRBF2P3    |
| ENSG00000270258 | 0.894837599 | 0           | 2.175380757  | 0.586153331 | 1           | DUXAP4     |
| ENSG00000252217 | 0.894837599 | 0           | 2.175380757  | 0.586153331 | 1           | RF00019    |
| ENSG00000223254 | 0.894837599 | 0           | 2.175380757  | 0.586153331 | 1           | RF00019    |
| ENSG00000286363 | 0.894837599 | 0           | 2.175380757  | 0.586153331 | 1           | AC087427.1 |
| ENSG00000213849 | 0.894837599 | 0           | 2.175380757  | 0.586153331 | 1           | AC104306.1 |
| ENSG00000114349 | 0.894837599 | 0           | 2.175380757  | 0.586153331 | 1           | GNAT1      |
| ENSG00000250974 | 0.894837599 | 0           | 2.175380757  | 0.586153331 | 1           | LINC02196  |
| ENSG00000254551 | 0.894837599 | 0           | 2.175380757  | 0.586153331 | 1           | AP000873.3 |
| ENSG00000141194 | 0.894837599 | 0           | 2.175380757  | 0.586153331 | 1           | OR4D1      |
| ENSG00000287190 | 0.894837599 | 0           | 2.175380757  | 0.586153331 | 1           | AC239799.2 |
| ENSG00000287858 | 0.894837599 | 0           | 2.175380757  | 0.586153331 | 1           | AC020550.2 |
| ENSG00000228868 | 0.894837599 | 0           | 2.175380757  | 0.586153331 | 1           | MYLK1      |
| ENSG00000234117 | 0.894837599 | 0           | 2.175380757  | 0.586153331 | 1           | AL445224.1 |
| ENSG00000227032 | 0.894837599 | 0           | 2.175380757  | 0.586153331 | 1           | RPS2P36    |
| ENSG00000258912 | 0.894837599 | 0           | 2.175380757  | 0.586153331 | 1           | LINC02316  |
| ENSG00000214976 | 0.894837599 | 0           | 2.175380757  | 0.586153331 | 1           | VDAC2P1    |
| ENSG00000225752 | 0.894837599 | 0           | 2.175380757  | 0.586153331 | 1           | AL023581.1 |
| ENSG00000226690 | 0.894837599 | 0           | 2.175380757  | 0.586153331 | 1           | AC013470.2 |

|                 |             |             |             |             |             |             |
|-----------------|-------------|-------------|-------------|-------------|-------------|-------------|
| ENSG00000253799 | 0.894837599 | 0           | 2.175380757 | 0.586153331 | 1           | LINC01030   |
| ENSG00000275710 | 0.894837599 | 0           | 2.175380757 | 0.586153331 | 1           | AC007485.1  |
| ENSG00000215720 | 0.894837599 | 0           | 2.175380757 | 0.586153331 | 1           | AL035405.1  |
| ENSG00000233473 | 0.894837599 | 0           | 2.175380757 | 0.586153331 | 1           | RAD1P2      |
| ENSG00000287628 | 0.894837599 | 0           | 2.175380757 | 0.586153331 | 1           | AC012511.2  |
| ENSG00000233153 | 0.894837599 | 0           | 2.175380757 | 0.586153331 | 1           | UBE2E2-AS1  |
| ENSG00000260120 | 0.894837599 | 0           | 2.175380757 | 0.586153331 | 1           | AC104066.2  |
| ENSG00000248455 | 0.894837599 | 0           | 2.175380757 | 0.586153331 | 1           | LINC02217   |
| ENSG00000253766 | 0.894837599 | 0           | 2.175380757 | 0.586153331 | 1           | AC091946.1  |
| ENSG00000226309 | 0.894837599 | 0           | 2.175380757 | 0.586153331 | 1           | SMARCE1P2   |
| ENSG00000261038 | 0.894837599 | 0           | 2.175380757 | 0.586153331 | 1           | AL133457.1  |
| ENSG00000244292 | 0.894837599 | 0           | 2.175380757 | 0.586153331 | 1           | OR9N1P      |
| ENSG00000253437 | 0.894837599 | 0           | 2.175380757 | 0.586153331 | 1           | RNU6-988P   |
| ENSG00000255340 | 0.894837599 | 0           | 2.175380757 | 0.586153331 | 1           | AC087276.3  |
| ENSG00000254610 | 0.894837599 | 0           | 2.175380757 | 0.586153331 | 1           | AC004923.1  |
| ENSG00000287043 | 0.894837599 | 0           | 2.175380757 | 0.586153331 | 1           | AL392083.2  |
| ENSG00000263978 | 0.894837599 | 0           | 2.175380757 | 0.586153331 | 1           | MIR4499     |
| ENSG00000258766 | 0.894837599 | 0           | 2.175380757 | 0.586153331 | 1           | DIO2-AS1    |
| ENSG00000274848 | 0.894837599 | 0           | 2.175380757 | 0.586153331 | 1           | RF00017     |
| ENSG00000278595 | 0.894837599 | 0           | 2.175380757 | 0.586153331 | 1           | AL133396.2  |
| ENSG00000229308 | 0.894837599 | 0           | 2.175380757 | 0.586153331 | 1           | AC010737.1  |
| ENSG00000199865 | 0.894837599 | 0           | 2.175380757 | 0.586153331 | 1           | RNU6-495P   |
| ENSG00000263681 | 0.894837599 | 0           | 2.175380757 | 0.586153331 | 1           | MIR3197     |
| ENSG00000142677 | 1.535511275 | 0.336469917 | 1.989323589 | 0.586240822 | 1           | IL22RA1     |
| ENSG00000233515 | 1.535511275 | 0.336469917 | 1.989323589 | 0.586240822 | 1           | LINC01518   |
| ENSG00000259103 | 1.535511275 | 0.336469917 | 1.989323589 | 0.586240822 | 1           | AF107885.2  |
| ENSG00000110092 | 14895.33603 | 13133.62651 | 0.181615851 | 0.5862847   | 0.696682345 | CCND1       |
| ENSG00000233588 | 5.745434885 | 4.035198856 | 0.522015413 | 0.586312724 | 0.696683782 | CYP51A1P2   |
| ENSG00000288044 | 0.89358395  | 0           | 2.173554885 | 0.586478188 | 1           | AL096870.10 |
| ENSG00000228403 | 0.89358395  | 0           | 2.173554885 | 0.586478188 | 1           | AC035139.1  |
| ENSG00000273493 | 0.89358395  | 0           | 2.173554885 | 0.586478188 | 1           | AC098479.1  |
| ENSG00000288079 | 0.89358395  | 0           | 2.173554885 | 0.586478188 | 1           | AC026329.1  |
| ENSG00000237371 | 0.89358395  | 0           | 2.173554885 | 0.586478188 | 1           | AL355803.1  |
| ENSG00000211683 | 0.89358395  | 0           | 2.173554885 | 0.586478188 | 1           | AP000346.1  |
| ENSG00000261245 | 0.89358395  | 0           | 2.173554885 | 0.586478188 | 1           | AC093520.2  |
| ENSG00000272077 | 0.89358395  | 0           | 2.173554885 | 0.586478188 | 1           | AC124045.1  |
| ENSG00000286897 | 0.89358395  | 0           | 2.173554885 | 0.586478188 | 1           | AC090515.6  |
| ENSG00000234512 | 0.89358395  | 0           | 2.173554885 | 0.586478188 | 1           | TLR12P      |
| ENSG00000186207 | 0.89358395  | 0           | 2.173554885 | 0.586478188 | 1           | LCE5A       |
| ENSG00000234523 | 0.89358395  | 0           | 2.173554885 | 0.586478188 | 1           | NDUFB1P2    |
| ENSG00000227338 | 0.89358395  | 0           | 2.173554885 | 0.586478188 | 1           | AL139280.1  |
| ENSG00000161610 | 0.89358395  | 0           | 2.173554885 | 0.586478188 | 1           | HCRT        |
| ENSG00000266559 | 0.89358395  | 0           | 2.173554885 | 0.586478188 | 1           | MIR4530     |
| ENSG00000214919 | 0.89358395  | 0           | 2.173554885 | 0.586478188 | 1           | AC104472.1  |
| ENSG00000249684 | 0.89358395  | 0           | 2.173554885 | 0.586478188 | 1           | AC106795.2  |
| ENSG00000254377 | 0.89358395  | 0           | 2.173554885 | 0.586478188 | 1           | MIR124-2HG  |
| ENSG00000268095 | 0.89358395  | 0           | 2.173554885 | 0.586478188 | 1           | ZNF649-AS1  |
| ENSG00000228541 | 0.89358395  | 0           | 2.173554885 | 0.586478188 | 1           | AC093159.1  |
| ENSG00000223466 | 0.89358395  | 0           | 2.173554885 | 0.586478188 | 1           | LINC01825   |
| ENSG00000265487 | 0.89358395  | 0           | 2.173554885 | 0.586478188 | 1           | AP001021.2  |
| ENSG00000232491 | 0.89358395  | 0           | 2.173554885 | 0.586478188 | 1           | SAPCD2P3    |

|                 |             |             |              |             |             |            |
|-----------------|-------------|-------------|--------------|-------------|-------------|------------|
| ENSG00000077080 | 0.89358395  | 0           | 2.173554885  | 0.586478188 | 1           | ACTL6B     |
| ENSG00000228842 | 0.89358395  | 0           | 2.173554885  | 0.586478188 | 1           | PCDH9-AS2  |
| ENSG00000253515 | 0.89358395  | 0           | 2.173554885  | 0.586478188 | 1           | AC018682.2 |
| ENSG00000243959 | 0.89358395  | 0           | 2.173554885  | 0.586478188 | 1           | RN7SL684P  |
| ENSG00000265658 | 0.89358395  | 0           | 2.173554885  | 0.586478188 | 1           | MIR3690    |
| ENSG00000165059 | 0.89358395  | 0           | 2.173554885  | 0.586478188 | 1           | PRKACG     |
| ENSG00000213529 | 0.89358395  | 0           | 2.173554885  | 0.586478188 | 1           | AL359073.1 |
| ENSG00000181009 | 0.89358395  | 0           | 2.173554885  | 0.586478188 | 1           | OR52N5     |
| ENSG00000270269 | 0.89358395  | 0           | 2.173554885  | 0.586478188 | 1           | IMMP1LP1   |
| ENSG00000266202 | 0.89358395  | 0           | 2.173554885  | 0.586478188 | 1           | AC005697.1 |
| ENSG00000228665 | 0.89358395  | 0           | 2.173554885  | 0.586478188 | 1           | BX679664.1 |
| ENSG00000200250 | 0.89358395  | 0           | 2.173554885  | 0.586478188 | 1           | RNU6-1147P |
| ENSG00000285619 | 0.89358395  | 0           | 2.173554885  | 0.586478188 | 1           | AL449214.1 |
| ENSG00000250980 | 0.89358395  | 0           | 2.173554885  | 0.586478188 | 1           | AC113155.1 |
| ENSG00000249074 | 0.89358395  | 0           | 2.173554885  | 0.586478188 | 1           | NDUFB2P1   |
| ENSG00000270697 | 0.89358395  | 0           | 2.173554885  | 0.586478188 | 1           | AC106791.2 |
| ENSG00000225051 | 0.89358395  | 0           | 2.173554885  | 0.586478188 | 1           | HMG3P22    |
| ENSG00000271608 | 0.89358395  | 0           | 2.173554885  | 0.586478188 | 1           | AL391646.1 |
| ENSG00000250614 | 0.89358395  | 0           | 2.173554885  | 0.586478188 | 1           | AC005522.1 |
| ENSG00000205898 | 0.89358395  | 0           | 2.173554885  | 0.586478188 | 1           | AC019155.1 |
| ENSG00000186288 | 0.89358395  | 0           | 2.173554885  | 0.586478188 | 1           | PABPC1L2A  |
| ENSG00000204816 | 0.89358395  | 0           | 2.173554885  | 0.586478188 | 1           | FGF7P5     |
| ENSG00000235718 | 0.89358395  | 0           | 2.173554885  | 0.586478188 | 1           | MFRP       |
| ENSG00000279770 | 0.89358395  | 0           | 2.173554885  | 0.586478188 | 1           | LINC00552  |
| ENSG00000280190 | 0.89358395  | 0           | 2.173554885  | 0.586478188 | 1           | AC027279.4 |
| ENSG00000279085 | 0.89358395  | 0           | 2.173554885  | 0.586478188 | 1           | AL022323.3 |
| ENSG00000234884 | 0.89358395  | 0           | 2.173554885  | 0.586478188 | 1           | AL022329.1 |
| ENSG00000280172 | 0.89358395  | 0           | 2.173554885  | 0.586478188 | 1           | FP475955.4 |
| ENSG00000255517 | 29.31365612 | 34.34542883 | -0.228958706 | 0.586609782 | 0.696973487 | AP002748.3 |
| ENSG00000152422 | 140.8732333 | 164.1357078 | -0.220617577 | 0.586610186 | 0.696973487 | XRCC4      |
| ENSG00000118690 | 75.59029223 | 64.11284694 | 0.235895343  | 0.586709749 | 0.697038437 | ARMC2      |
| ENSG00000197608 | 244.9900595 | 281.5293108 | -0.200014405 | 0.586718509 | 0.697038437 | ZNF841     |
| ENSG00000244346 | 2.714742909 | 1.436768536 | 0.919076909  | 0.58677857  | 0.697077916 | AC092953.1 |
| ENSG00000072864 | 0.907445357 | 1.854670712 | -1.018696216 | 0.587269502 | 0.697629232 | NDE1       |
| ENSG00000171049 | 4.887095642 | 8.599257852 | -0.812063841 | 0.587297705 | 0.697630837 | FPR2       |
| ENSG00000229368 | 4.251507832 | 6.032793384 | -0.511186765 | 0.587341429 | 0.697650879 | AC090587.2 |
| ENSG00000287916 | 20.90885268 | 16.98849653 | 0.302181357  | 0.587446102 | 0.69774331  | AC091607.2 |
| ENSG00000132000 | 128.7559785 | 159.1451076 | -0.306769688 | 0.587602013 | 0.697866025 | PODNL1     |
| ENSG00000287528 | 2.990361403 | 1.803920035 | 0.737026945  | 0.587603139 | 0.697866025 | AL121749.2 |
| ENSG00000072609 | 783.4324866 | 857.2721517 | -0.129823845 | 0.587672101 | 0.697916024 | CHFR       |
| ENSG00000259020 | 2.682005499 | 1.406086955 | 0.925044177  | 0.587811713 | 0.698049918 | AL049872.1 |
| ENSG00000185155 | 1.845120827 | 0.672939833 | 1.425902316  | 0.587891661 | 1           | MIXL1      |
| ENSG00000107105 | 1.845120827 | 0.672939833 | 1.425902316  | 0.587891661 | 1           | ELAVL2     |
| ENSG00000261067 | 16.98840898 | 13.74780796 | 0.308475423  | 0.588032764 | 0.698280508 | AC109460.3 |
| ENSG00000147669 | 801.0774795 | 882.621016  | -0.140233951 | 0.588430228 | 0.698720556 | POLR2K     |
| ENSG00000116747 | 702.9774354 | 756.1081989 | -0.104957337 | 0.588472555 | 0.698738881 | RO60       |
| ENSG00000165861 | 613.2912824 | 558.5804222 | 0.135363472  | 0.588551289 | 0.698800431 | ZFYVE1     |
| ENSG00000261341 | 0.907445357 | 1.803920035 | -0.988489104 | 0.588626447 | 0.698857731 | AC010325.1 |
| ENSG00000265943 | 3.341555177 | 1.682349583 | 0.965413242  | 0.588704734 | 0.698918739 | AC090912.1 |
| ENSG00000138231 | 290.5380801 | 317.9320407 | -0.130772304 | 0.588798392 | 0.698965608 | DBR1       |
| ENSG00000129514 | 1.521649867 | 3.12857473  | -1.0478569   | 0.588838357 | 0.698965608 | FOXA1      |



|                 |             |             |              |             |             |            |
|-----------------|-------------|-------------|--------------|-------------|-------------|------------|
| ENSG00000271933 | 11.08799131 | 7.907533193 | 0.490149194  | 0.58884168  | 0.698965608 | AL603756.1 |
| ENSG00000197149 | 2.682005499 | 1.447381022 | 0.898709725  | 0.588851824 | 0.698965608 | AC107956.1 |
| ENSG00000120948 | 2143.077143 | 2312.029568 | -0.109548029 | 0.588908366 | 0.69899482  | TARDBP     |
| ENSG00000177030 | 545.7269765 | 591.2797525 | -0.115537625 | 0.588930242 | 0.69899482  | DEAF1      |
| ENSG00000111775 | 822.648603  | 748.3323142 | 0.136534269  | 0.589260378 | 0.699354707 | COX6A1     |
| ENSG00000172428 | 1074.017091 | 965.9837723 | 0.152672273  | 0.589302013 | 0.699372172 | COPPS9     |
| ENSG00000286456 | 0.909952655 | 1.803920035 | -0.98606501  | 0.589562671 | 0.699604679 | AC016769.5 |
| ENSG00000187686 | 2.744973021 | 1.41669944  | 0.94661594   | 0.589578709 | 0.699604679 | KRT18P59   |
| ENSG00000275493 | 2.744973021 | 1.41669944  | 0.94661594   | 0.589578709 | 0.699604679 | AL627230.1 |
| ENSG00000185837 | 2.449224876 | 3.893559308 | -0.678655115 | 0.589742352 | 0.6997669   | HDHD5-AS1  |
| ENSG00000101464 | 605.9769588 | 541.5839414 | 0.161750493  | 0.589867499 | 0.699858954 | PIGU       |
| ENSG00000072518 | 724.0717144 | 677.6860417 | 0.095451058  | 0.589873807 | 0.699858954 | MARK2      |
| ENSG00000197530 | 1258.071038 | 1142.713024 | 0.139059396  | 0.589930479 | 0.699894231 | MIB2       |
| novel.1013      | 10.43875556 | 21.53210125 | -1.0433224   | 0.58998785  | 0.699904337 | -          |
| ENSG00000250068 | 0.922560414 | 1.823989131 | -0.985560518 | 0.589992875 | 0.699904337 | AL445187.1 |
| ENSG00000159733 | 489.3874677 | 399.0116203 | 0.295098192  | 0.590062524 | 0.699955001 | ZFYVE28    |
| novel.747       | 0.879722543 | 0           | 2.153145873  | 0.590114639 | 1           | -          |
| novel.709       | 0.879722543 | 0           | 2.153145873  | 0.590114639 | 1           | -          |
| novel.1056      | 0.879722543 | 0           | 2.153145873  | 0.590114639 | 1           | -          |
| ENSG00000225579 | 0.879722543 | 0           | 2.153145873  | 0.590114639 | 1           | EDNRB-AS1  |
| novel.147       | 0.879722543 | 0           | 2.153145873  | 0.590114639 | 1           | -          |
| ENSG00000224164 | 0.879722543 | 0           | 2.153145873  | 0.590114639 | 1           | AL133264.2 |
| ENSG00000236095 | 0.879722543 | 0           | 2.153145873  | 0.590114639 | 1           | AL807757.2 |
| ENSG00000287925 | 0.879722543 | 0           | 2.153145873  | 0.590114639 | 1           | AL353576.1 |
| ENSG00000286406 | 0.879722543 | 0           | 2.153145873  | 0.590114639 | 1           | AC138776.1 |
| ENSG00000272915 | 0.879722543 | 0           | 2.153145873  | 0.590114639 | 1           | AC018635.2 |
| ENSG00000249184 | 0.879722543 | 0           | 2.153145873  | 0.590114639 | 1           | AC107074.1 |
| ENSG00000286959 | 0.879722543 | 0           | 2.153145873  | 0.590114639 | 1           | AC104383.2 |
| ENSG00000181408 | 0.879722543 | 0           | 2.153145873  | 0.590114639 | 1           | UTS2R      |
| novel.1028      | 0.879722543 | 0           | 2.153145873  | 0.590114639 | 1           | -          |
| ENSG00000283647 | 0.879722543 | 0           | 2.153145873  | 0.590114639 | 1           | AL512643.1 |
| ENSG00000266605 | 0.879722543 | 0           | 2.153145873  | 0.590114639 | 1           | LONRF2P1   |
| ENSG00000124449 | 0.879722543 | 0           | 2.153145873  | 0.590114639 | 1           | IRGC       |
| ENSG00000237130 | 0.879722543 | 0           | 2.153145873  | 0.590114639 | 1           | MRPS6P2    |
| ENSG00000259685 | 0.879722543 | 0           | 2.153145873  | 0.590114639 | 1           | IDH2-DT    |
| ENSG00000236182 | 0.879722543 | 0           | 2.153145873  | 0.590114639 | 1           | AC009319.1 |
| ENSG00000269387 | 0.879722543 | 0           | 2.153145873  | 0.590114639 | 1           | AL365205.3 |
| ENSG00000219409 | 0.879722543 | 0           | 2.153145873  | 0.590114639 | 1           | AL590704.1 |
| ENSG00000181609 | 0.879722543 | 0           | 2.153145873  | 0.590114639 | 1           | OR52D1     |
| ENSG00000140287 | 0.879722543 | 0           | 2.153145873  | 0.590114639 | 1           | HDC        |
| ENSG00000287213 | 0.879722543 | 0           | 2.153145873  | 0.590114639 | 1           | AL121899.3 |
| novel.318       | 0.879722543 | 0           | 2.153145873  | 0.590114639 | 1           | -          |
| ENSG00000228108 | 0.879722543 | 0           | 2.153145873  | 0.590114639 | 1           | AC092839.1 |
| ENSG00000286806 | 0.879722543 | 0           | 2.153145873  | 0.590114639 | 1           | AC080005.1 |
| ENSG00000238043 | 0.879722543 | 0           | 2.153145873  | 0.590114639 | 1           | AC024559.1 |
| ENSG00000250377 | 0.879722543 | 0           | 2.153145873  | 0.590114639 | 1           | AC008525.1 |
| ENSG00000237471 | 0.879722543 | 0           | 2.153145873  | 0.590114639 | 1           | AC073115.2 |
| ENSG00000225493 | 0.879722543 | 0           | 2.153145873  | 0.590114639 | 1           | LINC01107  |
| ENSG00000251171 | 0.879722543 | 0           | 2.153145873  | 0.590114639 | 1           | AC096741.1 |
| ENSG00000226020 | 0.879722543 | 0           | 2.153145873  | 0.590114639 | 1           | CDK2AP2P3  |
| ENSG00000199874 | 0.879722543 | 0           | 2.153145873  | 0.590114639 | 1           | RNA5SP452  |

|                 |             |   |             |             |   |            |
|-----------------|-------------|---|-------------|-------------|---|------------|
| ENSG00000280623 | 0.879722543 | 0 | 2.153145873 | 0.590114639 | 1 | PCAT14     |
| ENSG00000224227 | 0.879722543 | 0 | 2.153145873 | 0.590114639 | 1 | OR2L1P     |
| ENSG00000277809 | 0.879722543 | 0 | 2.153145873 | 0.590114639 | 1 | RF02249    |
| ENSG00000239437 | 0.879722543 | 0 | 2.153145873 | 0.590114639 | 1 | RN7SL752P  |
| ENSG00000206623 | 0.879722543 | 0 | 2.153145873 | 0.590114639 | 1 | RNU6-979P  |
| ENSG00000284858 | 0.879722543 | 0 | 2.153145873 | 0.590114639 | 1 | AC091185.2 |
| ENSG00000255456 | 0.879722543 | 0 | 2.153145873 | 0.590114639 | 1 | AC084125.3 |
| ENSG00000256064 | 0.879722543 | 0 | 2.153145873 | 0.590114639 | 1 | AC063926.1 |
| ENSG00000271429 | 0.879722543 | 0 | 2.153145873 | 0.590114639 | 1 | RPL17P51   |
| ENSG00000267088 | 0.879722543 | 0 | 2.153145873 | 0.590114639 | 1 | AC087683.1 |
| ENSG00000276631 | 0.879722543 | 0 | 2.153145873 | 0.590114639 | 1 | AC007786.3 |
| ENSG00000224019 | 0.879722543 | 0 | 2.153145873 | 0.590114639 | 1 | RPL21P32   |
| ENSG00000163285 | 0.879722543 | 0 | 2.153145873 | 0.590114639 | 1 | GABRG1     |
| ENSG00000250374 | 0.879722543 | 0 | 2.153145873 | 0.590114639 | 1 | TRIM75P    |
| ENSG00000287581 | 0.879722543 | 0 | 2.153145873 | 0.590114639 | 1 | AC016549.1 |
| ENSG00000226436 | 0.879722543 | 0 | 2.153145873 | 0.590114639 | 1 | AC002367.1 |
| ENSG00000201118 | 0.879722543 | 0 | 2.153145873 | 0.590114639 | 1 | RF00019    |
| ENSG00000227101 | 0.879722543 | 0 | 2.153145873 | 0.590114639 | 1 | AC025822.1 |
| ENSG00000287047 | 0.879722543 | 0 | 2.153145873 | 0.590114639 | 1 | AL133395.1 |
| ENSG00000256226 | 0.879722543 | 0 | 2.153145873 | 0.590114639 | 1 | AC092747.1 |
| ENSG00000287991 | 0.879722543 | 0 | 2.153145873 | 0.590114639 | 1 | AL162151.3 |
| ENSG00000254912 | 0.879722543 | 0 | 2.153145873 | 0.590114639 | 1 | AC135983.3 |
| ENSG00000265331 | 0.879722543 | 0 | 2.153145873 | 0.590114639 | 1 | MIR4524B   |
| ENSG00000286815 | 0.879722543 | 0 | 2.153145873 | 0.590114639 | 1 | AP005242.5 |
| ENSG00000228961 | 0.879722543 | 0 | 2.153145873 | 0.590114639 | 1 | LINC01690  |
| ENSG00000213871 | 0.879722543 | 0 | 2.153145873 | 0.590114639 | 1 | TAF9BP1    |
| ENSG00000272774 | 0.879722543 | 0 | 2.153145873 | 0.590114639 | 1 | AC112219.2 |
| ENSG00000250643 | 0.879722543 | 0 | 2.153145873 | 0.590114639 | 1 | AC083906.3 |
| ENSG00000279638 | 0.879722543 | 0 | 2.153145873 | 0.590114639 | 1 | AC008873.1 |
| ENSG00000204469 | 0.879722543 | 0 | 2.153145873 | 0.590114639 | 1 | PRRC2A     |
| ENSG00000235071 | 0.879722543 | 0 | 2.153145873 | 0.590114639 | 1 | AC073909.1 |
| ENSG00000188937 | 0.879722543 | 0 | 2.153145873 | 0.590114639 | 1 | NYX        |
| ENSG00000206723 | 0.879722543 | 0 | 2.153145873 | 0.590114639 | 1 | RNU6-1056P |
| ENSG00000176988 | 0.879722543 | 0 | 2.153145873 | 0.590114639 | 1 | FMR1NB     |
| ENSG00000248050 | 0.879722543 | 0 | 2.153145873 | 0.590114639 | 1 | AC079061.1 |
| ENSG00000254241 | 0.879722543 | 0 | 2.153145873 | 0.590114639 | 1 | MTCO1P47   |
| ENSG00000250390 | 0.879722543 | 0 | 2.153145873 | 0.590114639 | 1 | AP001790.1 |
| ENSG00000254616 | 0.879722543 | 0 | 2.153145873 | 0.590114639 | 1 | AP001775.1 |
| ENSG00000095596 | 0.879722543 | 0 | 2.153145873 | 0.590114639 | 1 | CYP26A1    |
| ENSG00000257195 | 0.879722543 | 0 | 2.153145873 | 0.590114639 | 1 | HNRNPA1P50 |
| ENSG00000286092 | 0.879722543 | 0 | 2.153145873 | 0.590114639 | 1 | AC117503.5 |
| ENSG00000259221 | 0.879722543 | 0 | 2.153145873 | 0.590114639 | 1 | AC023905.1 |
| ENSG00000259672 | 0.879722543 | 0 | 2.153145873 | 0.590114639 | 1 | AC087612.1 |
| ENSG00000232518 | 0.879722543 | 0 | 2.153145873 | 0.590114639 | 1 | AC074366.1 |
| ENSG00000172799 | 0.879722543 | 0 | 2.153145873 | 0.590114639 | 1 | ZBTB8OSP2  |
| ENSG00000252739 | 0.879722543 | 0 | 2.153145873 | 0.590114639 | 1 | RNU7-151P  |
| ENSG00000250576 | 0.879722543 | 0 | 2.153145873 | 0.590114639 | 1 | AC012629.1 |
| ENSG00000248693 | 0.879722543 | 0 | 2.153145873 | 0.590114639 | 1 | LINC02100  |
| ENSG00000241829 | 0.879722543 | 0 | 2.153145873 | 0.590114639 | 1 | RPL21P54   |
| ENSG00000250407 | 0.879722543 | 0 | 2.153145873 | 0.590114639 | 1 | AC008728.1 |
| ENSG00000285961 | 0.879722543 | 0 | 2.153145873 | 0.590114639 | 1 | AL590814.1 |

|                 |             |   |             |             |   |             |
|-----------------|-------------|---|-------------|-------------|---|-------------|
| ENSG00000227660 | 0.879722543 | 0 | 2.153145873 | 0.590114639 | 1 | UST-AS1     |
| ENSG00000226097 | 0.879722543 | 0 | 2.153145873 | 0.590114639 | 1 | AC099342.1  |
| ENSG00000254129 | 0.879722543 | 0 | 2.153145873 | 0.590114639 | 1 | AC108449.1  |
| ENSG00000236998 | 0.879722543 | 0 | 2.153145873 | 0.590114639 | 1 | AL354794.2  |
| ENSG00000232896 | 0.879722543 | 0 | 2.153145873 | 0.590114639 | 1 | AL592463.1  |
| ENSG00000254500 | 0.879722543 | 0 | 2.153145873 | 0.590114639 | 1 | RANP3       |
| ENSG00000256197 | 0.879722543 | 0 | 2.153145873 | 0.590114639 | 1 | TSPAN9-IT1  |
| ENSG00000286671 | 0.879722543 | 0 | 2.153145873 | 0.590114639 | 1 | AC025253.2  |
| ENSG00000287492 | 0.879722543 | 0 | 2.153145873 | 0.590114639 | 1 | AL512358.2  |
| ENSG00000258927 | 0.879722543 | 0 | 2.153145873 | 0.590114639 | 1 | AL133467.2  |
| ENSG00000254793 | 0.879722543 | 0 | 2.153145873 | 0.590114639 | 1 | FDPSP4      |
| ENSG00000261823 | 0.879722543 | 0 | 2.153145873 | 0.590114639 | 1 | AC084782.2  |
| ENSG00000259722 | 0.879722543 | 0 | 2.153145873 | 0.590114639 | 1 | AC087465.1  |
| ENSG00000251698 | 0.879722543 | 0 | 2.153145873 | 0.590114639 | 1 | RNA5SP445   |
| novel.527       | 0.879722543 | 0 | 2.153145873 | 0.590114639 | 1 | -           |
| ENSG00000252777 | 0.879722543 | 0 | 2.153145873 | 0.590114639 | 1 | RF00422     |
| ENSG00000264773 | 0.879722543 | 0 | 2.153145873 | 0.590114639 | 1 | MIR4420     |
| ENSG00000233877 | 0.879722543 | 0 | 2.153145873 | 0.590114639 | 1 | AL606517.1  |
| ENSG00000231992 | 0.879722543 | 0 | 2.153145873 | 0.590114639 | 1 | AC092802.3  |
| ENSG00000230489 | 0.879722543 | 0 | 2.153145873 | 0.590114639 | 1 | VAV3-AS1    |
| ENSG00000186086 | 0.879722543 | 0 | 2.153145873 | 0.590114639 | 1 | NBPF6       |
| ENSG00000201129 | 0.879722543 | 0 | 2.153145873 | 0.590114639 | 1 | SNORA58B    |
| ENSG00000285636 | 0.879722543 | 0 | 2.153145873 | 0.590114639 | 1 | AL450163.1  |
| ENSG00000225272 | 0.879722543 | 0 | 2.153145873 | 0.590114639 | 1 | AL451074.2  |
| ENSG00000230231 | 0.879722543 | 0 | 2.153145873 | 0.590114639 | 1 | FMO7P       |
| ENSG00000270654 | 0.879722543 | 0 | 2.153145873 | 0.590114639 | 1 | NUTF2P8     |
| ENSG00000266063 | 0.879722543 | 0 | 2.153145873 | 0.590114639 | 1 | MIR4771-2   |
| ENSG00000233286 | 0.879722543 | 0 | 2.153145873 | 0.590114639 | 1 | MTND3P10    |
| ENSG00000229827 | 0.879722543 | 0 | 2.153145873 | 0.590114639 | 1 | AC093899.1  |
| ENSG00000207815 | 0.879722543 | 0 | 2.153145873 | 0.590114639 | 1 | MIR563      |
| ENSG00000227309 | 0.879722543 | 0 | 2.153145873 | 0.590114639 | 1 | AC140076.1  |
| ENSG00000201827 | 0.879722543 | 0 | 2.153145873 | 0.590114639 | 1 | RF00438     |
| ENSG00000279147 | 0.879722543 | 0 | 2.153145873 | 0.590114639 | 1 | AC112504.1  |
| ENSG00000241479 | 0.879722543 | 0 | 2.153145873 | 0.590114639 | 1 | AC074033.1  |
| ENSG00000279913 | 0.879722543 | 0 | 2.153145873 | 0.590114639 | 1 | AP001962.1  |
| ENSG00000170180 | 0.879722543 | 0 | 2.153145873 | 0.590114639 | 1 | GYPA        |
| ENSG00000234111 | 0.879722543 | 0 | 2.153145873 | 0.590114639 | 1 | LINC02433   |
| ENSG00000279139 | 0.879722543 | 0 | 2.153145873 | 0.590114639 | 1 | AC098679.3  |
| ENSG00000250227 | 0.879722543 | 0 | 2.153145873 | 0.590114639 | 1 | TRIM60P14   |
| ENSG00000248962 | 0.879722543 | 0 | 2.153145873 | 0.590114639 | 1 | AC025773.1  |
| ENSG00000249928 | 0.879722543 | 0 | 2.153145873 | 0.590114639 | 1 | UQCRBP3     |
| ENSG00000199731 | 0.879722543 | 0 | 2.153145873 | 0.590114639 | 1 | RNU6-1079P  |
| ENSG00000251575 | 0.879722543 | 0 | 2.153145873 | 0.590114639 | 1 | C5orf64-AS1 |
| ENSG00000264536 | 0.879722543 | 0 | 2.153145873 | 0.590114639 | 1 | MIR5706     |
| ENSG00000225869 | 0.879722543 | 0 | 2.153145873 | 0.590114639 | 1 | AC008696.1  |
| ENSG00000214027 | 0.879722543 | 0 | 2.153145873 | 0.590114639 | 1 | ARPC3P5     |
| ENSG00000206848 | 0.879722543 | 0 | 2.153145873 | 0.590114639 | 1 | RNU6-890P   |
| ENSG00000137204 | 0.879722543 | 0 | 2.153145873 | 0.590114639 | 1 | SLC22A7     |
| ENSG00000227215 | 0.879722543 | 0 | 2.153145873 | 0.590114639 | 1 | AL355613.1  |
| ENSG00000180658 | 0.879722543 | 0 | 2.153145873 | 0.590114639 | 1 | OR2A4       |
| ENSG00000201012 | 0.879722543 | 0 | 2.153145873 | 0.590114639 | 1 | RF00019     |

|                 |             |   |             |             |   |            |
|-----------------|-------------|---|-------------|-------------|---|------------|
| ENSG00000274656 | 0.879722543 | 0 | 2.153145873 | 0.590114639 | 1 | RN7SL625P  |
| ENSG00000241357 | 0.879722543 | 0 | 2.153145873 | 0.590114639 | 1 | AC092849.2 |
| ENSG00000275356 | 0.879722543 | 0 | 2.153145873 | 0.590114639 | 1 | C7orf77    |
| ENSG00000201354 | 0.879722543 | 0 | 2.153145873 | 0.590114639 | 1 | RF00019    |
| ENSG00000240031 | 0.879722543 | 0 | 2.153145873 | 0.590114639 | 1 | OR9A3P     |
| ENSG00000279682 | 0.879722543 | 0 | 2.153145873 | 0.590114639 | 1 | AC120338.1 |
| ENSG00000235447 | 0.879722543 | 0 | 2.153145873 | 0.590114639 | 1 | TRAPPC13P1 |
| ENSG00000179031 | 0.879722543 | 0 | 2.153145873 | 0.590114639 | 1 | Z73417.1   |
| ENSG00000200436 | 0.879722543 | 0 | 2.153145873 | 0.590114639 | 1 | RF00019    |
| ENSG00000188512 | 0.879722543 | 0 | 2.153145873 | 0.590114639 | 1 | AF279873.1 |
| ENSG00000201231 | 0.879722543 | 0 | 2.153145873 | 0.590114639 | 1 | RNU4-50P   |
| ENSG00000254387 | 0.879722543 | 0 | 2.153145873 | 0.590114639 | 1 | MYL12AP1   |
| ENSG00000207378 | 0.879722543 | 0 | 2.153145873 | 0.590114639 | 1 | RNU6-748P  |
| ENSG00000253912 | 0.879722543 | 0 | 2.153145873 | 0.590114639 | 1 | AC018442.3 |
| ENSG00000227383 | 0.879722543 | 0 | 2.153145873 | 0.590114639 | 1 | AL353662.1 |
| ENSG00000255089 | 0.879722543 | 0 | 2.153145873 | 0.590114639 | 1 | AC136475.4 |
| ENSG00000255476 | 0.879722543 | 0 | 2.153145873 | 0.590114639 | 1 | AC011092.2 |
| ENSG00000255043 | 0.879722543 | 0 | 2.153145873 | 0.590114639 | 1 | NAV2-AS5   |
| ENSG00000254984 | 0.879722543 | 0 | 2.153145873 | 0.590114639 | 1 | FTLP6      |
| ENSG00000255353 | 0.879722543 | 0 | 2.153145873 | 0.590114639 | 1 | AP003057.1 |
| ENSG00000255982 | 0.879722543 | 0 | 2.153145873 | 0.590114639 | 1 | NXPE2P1    |
| ENSG00000264217 | 0.879722543 | 0 | 2.153145873 | 0.590114639 | 1 | RPL35AP25  |
| ENSG00000222503 | 0.879722543 | 0 | 2.153145873 | 0.590114639 | 1 | RF00019    |
| ENSG00000227586 | 0.879722543 | 0 | 2.153145873 | 0.590114639 | 1 | RPS26P39   |
| ENSG00000264028 | 0.879722543 | 0 | 2.153145873 | 0.590114639 | 1 | RN7SL744P  |
| ENSG00000272215 | 0.879722543 | 0 | 2.153145873 | 0.590114639 | 1 | RF00066    |
| ENSG00000280354 | 0.879722543 | 0 | 2.153145873 | 0.590114639 | 1 | AC073592.9 |
| ENSG00000271901 | 0.879722543 | 0 | 2.153145873 | 0.590114639 | 1 | AL161716.1 |
| ENSG00000234384 | 0.879722543 | 0 | 2.153145873 | 0.590114639 | 1 | LINC01049  |
| ENSG00000169327 | 0.879722543 | 0 | 2.153145873 | 0.590114639 | 1 | OR5AU1     |
| ENSG00000242061 | 0.879722543 | 0 | 2.153145873 | 0.590114639 | 1 | AL160314.1 |
| ENSG00000259039 | 0.879722543 | 0 | 2.153145873 | 0.590114639 | 1 | AL161804.1 |
| ENSG00000259463 | 0.879722543 | 0 | 2.153145873 | 0.590114639 | 1 | AC020661.2 |
| ENSG00000260206 | 0.879722543 | 0 | 2.153145873 | 0.590114639 | 1 | AC105020.2 |
| ENSG00000279225 | 0.879722543 | 0 | 2.153145873 | 0.590114639 | 1 | AC138305.3 |
| ENSG00000199301 | 0.879722543 | 0 | 2.153145873 | 0.590114639 | 1 | RNU6-208P  |
| ENSG00000261313 | 0.879722543 | 0 | 2.153145873 | 0.590114639 | 1 | AC105430.1 |
| ENSG00000252349 | 0.879722543 | 0 | 2.153145873 | 0.590114639 | 1 | RF00322    |
| ENSG00000267790 | 0.879722543 | 0 | 2.153145873 | 0.590114639 | 1 | LINC01987  |
| ENSG00000266107 | 0.879722543 | 0 | 2.153145873 | 0.590114639 | 1 | MIR4525    |
| ENSG00000200883 | 0.879722543 | 0 | 2.153145873 | 0.590114639 | 1 | RF00019    |
| ENSG00000265717 | 0.879722543 | 0 | 2.153145873 | 0.590114639 | 1 | AC103808.3 |
| ENSG00000199497 | 0.879722543 | 0 | 2.153145873 | 0.590114639 | 1 | RNU1-94P   |
| ENSG00000264616 | 0.879722543 | 0 | 2.153145873 | 0.590114639 | 1 | MIR4755    |
| ENSG00000232880 | 0.879722543 | 0 | 2.153145873 | 0.590114639 | 1 | NDUFB4P10  |
| ENSG00000267205 | 0.879722543 | 0 | 2.153145873 | 0.590114639 | 1 | AC005954.3 |
| ENSG00000268278 | 0.879722543 | 0 | 2.153145873 | 0.590114639 | 1 | AC123912.3 |
| ENSG00000268053 | 0.879722543 | 0 | 2.153145873 | 0.590114639 | 1 | AC007785.2 |
| ENSG00000283515 | 0.879722543 | 0 | 2.153145873 | 0.590114639 | 1 | AC020915.5 |
| ENSG00000251510 | 0.879722543 | 0 | 2.153145873 | 0.590114639 | 1 | AC022486.1 |
| ENSG00000229608 | 0.879722543 | 0 | 2.153145873 | 0.590114639 | 1 | GOLGA2P4   |

|                 |             |             |              |             |             |            |
|-----------------|-------------|-------------|--------------|-------------|-------------|------------|
| ENSG00000273692 | 0.879722543 | 0           | 2.153145873  | 0.590114639 | 1           | AL050303.2 |
| ENSG00000224602 | 0.879722543 | 0           | 2.153145873  | 0.590114639 | 1           | RPS26P5    |
| ENSG00000233215 | 0.879722543 | 0           | 2.153145873  | 0.590114639 | 1           | LINC01687  |
| ENSG00000182591 | 0.879722543 | 0           | 2.153145873  | 0.590114639 | 1           | KRTAP11-1  |
| ENSG00000200792 | 0.879722543 | 0           | 2.153145873  | 0.590114639 | 1           | SNORA80A   |
| ENSG00000278934 | 12.93088958 | 7.825972539 | 0.728755891  | 0.590148739 | 0.700010941 | AC117489.1 |
| ENSG00000258469 | 4.811520361 | 2.731897526 | 0.800927359  | 0.590163567 | 0.700010941 | CHMP4BP1   |
| ENSG00000265491 | 932.7624212 | 1020.437235 | -0.129839419 | 0.590252182 | 0.700057054 | RNF115     |
| ENSG00000115318 | 1177.426831 | 953.3714299 | 0.304303881  | 0.590256334 | 0.700057054 | LOXL3      |
| ENSG00000275632 | 10.81996598 | 8.040872005 | 0.43748513   | 0.590508964 | 0.700324709 | AL035461.2 |
| ENSG00000259431 | 137.3677063 | 121.6174808 | 0.17513796   | 0.590747297 | 0.700575384 | THTPA      |
| ENSG00000273181 | 2.767681241 | 1.467450118 | 0.921783957  | 0.590968919 | 0.70080622  | AC131235.3 |
| ENSG00000180535 | 3.999851207 | 6.654854146 | -0.732772245 | 0.591053398 | 0.70087441  | BHLHA15    |
| ENSG00000267834 | 4.499403511 | 2.954969332 | 0.623998865  | 0.591133532 | 0.700937442 | AL592211.1 |
| ENSG00000258099 | 2.766427592 | 4.718751175 | -0.772190634 | 0.591281441 | 0.701080829 | ATXN2-AS   |
| ENSG00000248557 | 7.780498464 | 5.208757394 | 0.569981018  | 0.591353442 | 0.701118296 | AC024558.1 |
| ENSG00000269190 | 6.623903779 | 4.525205075 | 0.537507458  | 0.591367012 | 0.701118296 | FBXO17     |
| ENSG00000233837 | 0.615458159 | 1.447381022 | -1.238937277 | 0.59143162  | 1           | EIF3LP2    |
| ENSG00000169435 | 0.615458159 | 1.447381022 | -1.238937277 | 0.59143162  | 1           | RASSF6     |
| ENSG00000251287 | 8.165683297 | 5.494476633 | 0.556479694  | 0.591470091 | 0.701208507 | ALG1L2     |
| ENSG00000149269 | 719.9971692 | 805.2835449 | -0.161375162 | 0.591639008 | 0.70137676  | PAK1       |
| ENSG00000204160 | 494.8194883 | 539.1323092 | -0.123472735 | 0.591785987 | 0.70149545  | ZDHHC18    |
| ENSG00000171649 | 105.27577   | 116.7688584 | -0.150407749 | 0.591793128 | 0.70149545  | ZIK1       |
| ENSG00000068971 | 1010.711719 | 862.832496  | 0.228578452  | 0.592003941 | 0.701713326 | PPP2R5B    |
| ENSG00000171159 | 788.4493878 | 697.3874885 | 0.176906067  | 0.59203788  | 0.70172154  | C9orf16    |
| ENSG00000227113 | 3.926783224 | 2.537067156 | 0.636085119  | 0.59217557  | 0.70185272  | AC073210.1 |
| ENSG00000267871 | 13.75746032 | 10.06914812 | 0.453277397  | 0.592315187 | 0.701928429 | ZNF460-AS1 |
| ENSG00000237015 | 8.955969152 | 12.14701903 | -0.436849185 | 0.592319326 | 0.701928429 | AL031186.1 |
| ENSG00000178974 | 337.1645142 | 376.2874925 | -0.157584163 | 0.592320499 | 0.701928429 | FBXO34     |
| ENSG00000225573 | 13.32714378 | 16.45848051 | -0.305924081 | 0.59240445  | 0.701995895 | RPL35P5    |
| ENSG00000163435 | 9.570173662 | 6.409273099 | 0.593368232  | 0.592526266 | 0.702108224 | ELF3       |
| ENSG00000245479 | 1.804790254 | 0.672939833 | 1.397143066  | 0.592757008 | 1           | LINC01585  |
| ENSG00000279957 | 1.81990531  | 0.672939833 | 1.4082042    | 0.592785102 | 1           | AC110769.3 |
| ENSG00000226086 | 4.839243176 | 3.291439249 | 0.566614952  | 0.592822843 | 0.702427614 | EIF3LP3    |
| ENSG00000240057 | 10.63253053 | 7.999577937 | 0.415068227  | 0.593056946 | 0.702672953 | AC078785.1 |
| ENSG00000133884 | 1086.250069 | 1167.632008 | -0.104077177 | 0.593106776 | 0.702699947 | DPF2       |
| ENSG00000241163 | 5.821010166 | 3.576002612 | 0.698873241  | 0.593240711 | 0.702826581 | LINC00877  |
| ENSG00000261135 | 0.61420451  | 1.436768536 | -1.233093097 | 0.593296692 | 1           | AL137802.2 |
| ENSG00000187492 | 3.328947419 | 5.760126776 | -0.800913755 | 0.593397129 | 0.702979838 | CDHR4      |
| ENSG00000240005 | 2.374903244 | 3.893559308 | -0.709515423 | 0.593450258 | 0.703010722 | STIM2-AS1  |
| ENSG00000197457 | 879.1940525 | 1032.558174 | -0.232204999 | 0.593561657 | 0.703110628 | STMN3      |
| ENSG00000143520 | 3.812131018 | 1.518200796 | 1.342697396  | 0.593683558 | 0.703199234 | FLG2       |
| ENSG00000189337 | 269.7961172 | 194.8245661 | 0.469106553  | 0.593722423 | 0.703199234 | KAZN       |
| ENSG00000258472 | 75.47223474 | 63.21187379 | 0.254113227  | 0.593737247 | 0.703199234 | AC005726.1 |
| ENSG00000246090 | 95.59496231 | 79.3883123  | 0.267888956  | 0.593744721 | 0.703199234 | AP002026.1 |
| ENSG00000235489 | 1.215801261 | 2.140389951 | -0.820808853 | 0.593794141 | 0.703225707 | DBF4P1     |
| ENSG00000184992 | 309.2282229 | 263.4290641 | 0.230302339  | 0.593826797 | 0.703232326 | BRI3BP     |
| ENSG00000272279 | 6.090360416 | 3.790773684 | 0.700343544  | 0.594053169 | 0.70346834  | AL512329.2 |
| ENSG00000279807 | 2.987854105 | 1.456837632 | 1.043297376  | 0.594157129 | 0.703559381 | AC011472.5 |
| ENSG00000169246 | 10.96707086 | 7.060987961 | 0.644667546  | 0.594347094 | 0.703752249 | NPIP3      |
| ENSG00000234268 | 2.44546393  | 4.1272436   | -0.745961431 | 0.594383329 | 0.70376308  | AP000936.3 |

|                 |             |             |              |             |             |                 |
|-----------------|-------------|-------------|--------------|-------------|-------------|-----------------|
| ENSG00000125652 | 724.7057475 | 644.7011341 | 0.168886448  | 0.594441936 | 0.703789931 | ALKBH7          |
| ENSG00000137434 | 0           | 0.743759607 | -2.147682199 | 0.594466313 | 1           | C6orf52         |
| ENSG00000241211 | 0           | 0.743759607 | -2.147682199 | 0.594466313 | 1           | IQCJ-SCHIP1-AS1 |
| ENSG00000137745 | 0           | 0.743759607 | -2.147682199 | 0.594466313 | 1           | MMP13           |
| ENSG00000165462 | 0           | 0.743759607 | -2.147682199 | 0.594466313 | 1           | PHOX2A          |
| ENSG00000160683 | 0           | 0.743759607 | -2.147682199 | 0.594466313 | 1           | CXCR5           |
| ENSG00000250929 | 0           | 0.743759607 | -2.147682199 | 0.594466313 | 1           | LINC01181       |
| ENSG00000239473 | 0           | 0.743759607 | -2.147682199 | 0.594466313 | 1           | RPL7P38         |
| ENSG00000206651 | 0           | 0.743759607 | -2.147682199 | 0.594466313 | 1           | RF00019         |
| ENSG00000288033 | 0           | 0.743759607 | -2.147682199 | 0.594466313 | 1           | AC137894.3      |
| ENSG00000232875 | 0           | 0.743759607 | -2.147682199 | 0.594466313 | 1           | HMG2P35         |
| ENSG00000184844 | 0           | 0.743759607 | -2.147682199 | 0.594466313 | 1           | CYCSP45         |
| ENSG00000200942 | 0           | 0.743759607 | -2.147682199 | 0.594466313 | 1           | RNU6-501P       |
| ENSG00000237220 | 0           | 0.743759607 | -2.147682199 | 0.594466313 | 1           | AC104777.2      |
| ENSG00000225794 | 0           | 0.743759607 | -2.147682199 | 0.594466313 | 1           | AC073321.1      |
| ENSG00000279481 | 0           | 0.743759607 | -2.147682199 | 0.594466313 | 1           | AC104791.2      |
| ENSG00000204915 | 0           | 0.743759607 | -2.147682199 | 0.594466313 | 1           | AC234772.1      |
| ENSG00000247473 | 0           | 0.743759607 | -2.147682199 | 0.594466313 | 1           | CARS-AS1        |
| ENSG00000276972 | 0           | 0.743759607 | -2.147682199 | 0.594466313 | 1           | AC078880.5      |
| ENSG00000256802 | 0           | 0.743759607 | -2.147682199 | 0.594466313 | 1           | AC022613.1      |
| ENSG00000229983 | 0           | 0.743759607 | -2.147682199 | 0.594466313 | 1           | AL606468.1      |
| ENSG00000214810 | 0           | 0.743759607 | -2.147682199 | 0.594466313 | 1           | CYCSP55         |
| ENSG00000229380 | 0           | 0.743759607 | -2.147682199 | 0.594466313 | 1           | AC147651.2      |
| ENSG00000253471 | 0           | 0.743759607 | -2.147682199 | 0.594466313 | 1           | AC012574.1      |
| ENSG00000232646 | 0           | 0.743759607 | -2.147682199 | 0.594466313 | 1           | AL731563.1      |
| ENSG00000257674 | 0           | 0.743759607 | -2.147682199 | 0.594466313 | 1           | AC020629.1      |
| ENSG00000258935 | 0           | 0.743759607 | -2.147682199 | 0.594466313 | 1           | AL096869.1      |
| ENSG00000259469 | 0           | 0.743759607 | -2.147682199 | 0.594466313 | 1           | AC084757.2      |
| ENSG00000261714 | 0           | 0.743759607 | -2.147682199 | 0.594466313 | 1           | AC105137.1      |
| ENSG00000204684 | 0           | 0.743759607 | -2.147682199 | 0.594466313 | 1           | AL133464.1      |
| ENSG00000284677 | 0           | 0.743759607 | -2.147682199 | 0.594466313 | 1           | AL031985.4      |
| ENSG00000251785 | 0           | 0.743759607 | -2.147682199 | 0.594466313 | 1           | RNA5SP20        |
| ENSG00000275064 | 0           | 0.743759607 | -2.147682199 | 0.594466313 | 1           | AC239860.1      |
| ENSG00000255148 | 0           | 0.743759607 | -2.147682199 | 0.594466313 | 1           | AC239802.2      |
| ENSG00000187173 | 0           | 0.743759607 | -2.147682199 | 0.594466313 | 1           | LCE2A           |
| ENSG00000237166 | 0           | 0.743759607 | -2.147682199 | 0.594466313 | 1           | LINC01792       |
| ENSG00000212534 | 0           | 0.743759607 | -2.147682199 | 0.594466313 | 1           | SNORD70         |
| ENSG00000207647 | 0           | 0.743759607 | -2.147682199 | 0.594466313 | 1           | MIR153-1        |
| ENSG00000201182 | 0           | 0.743759607 | -2.147682199 | 0.594466313 | 1           | RNU6-670P       |
| ENSG00000226621 | 0           | 0.743759607 | -2.147682199 | 0.594466313 | 1           | AC083855.1      |
| ENSG00000239926 | 0           | 0.743759607 | -2.147682199 | 0.594466313 | 1           | PRDX3P4         |
| ENSG00000270981 | 0           | 0.743759607 | -2.147682199 | 0.594466313 | 1           | AC092944.2      |
| ENSG00000248288 | 0           | 0.743759607 | -2.147682199 | 0.594466313 | 1           | AC008868.1      |
| ENSG00000221464 | 0           | 0.743759607 | -2.147682199 | 0.594466313 | 1           | MIR1271         |
| ENSG00000232492 | 0           | 0.743759607 | -2.147682199 | 0.594466313 | 1           | NPM1P13         |
| ENSG00000252590 | 0           | 0.743759607 | -2.147682199 | 0.594466313 | 1           | RNU7-143P       |
| ENSG00000223189 | 0           | 0.743759607 | -2.147682199 | 0.594466313 | 1           | RNU6-177P       |
| ENSG00000284032 | 0           | 0.743759607 | -2.147682199 | 0.594466313 | 1           | MIR29A          |
| ENSG00000171483 | 0           | 0.743759607 | -2.147682199 | 0.594466313 | 1           | SSX6P           |
| ENSG00000253503 | 0           | 0.743759607 | -2.147682199 | 0.594466313 | 1           | AC060765.1      |
| ENSG00000174417 | 0           | 0.743759607 | -2.147682199 | 0.594466313 | 1           | TRHR            |

|                 |             |             |              |             |             |                        |
|-----------------|-------------|-------------|--------------|-------------|-------------|------------------------|
| ENSG00000264163 | 0           | 0.743759607 | -2.147682199 | 0.594466313 | 1           | MIR3689B               |
| ENSG00000181616 | 0           | 0.743759607 | -2.147682199 | 0.594466313 | 1           | OR52H1                 |
| ENSG00000233646 | 0           | 0.743759607 | -2.147682199 | 0.594466313 | 1           | OR52T1P                |
| ENSG00000200345 | 0           | 0.743759607 | -2.147682199 | 0.594466313 | 1           | RNU6-485P              |
| ENSG00000257289 | 0           | 0.743759607 | -2.147682199 | 0.594466313 | 1           | AC025423.5             |
| ENSG00000235472 | 0           | 0.743759607 | -2.147682199 | 0.594466313 | 1           | EIF4A1P7               |
| ENSG00000258531 | 0           | 0.743759607 | -2.147682199 | 0.594466313 | 1           | BANF1P1                |
| ENSG00000201950 | 0           | 0.743759607 | -2.147682199 | 0.594466313 | 1           | SNORD113-9             |
| ENSG00000259389 | 0           | 0.743759607 | -2.147682199 | 0.594466313 | 1           | H3F3AP1                |
| ENSG00000285970 | 0           | 0.743759607 | -2.147682199 | 0.594466313 | 1           | AC106820.6             |
| ENSG00000266599 | 0           | 0.743759607 | -2.147682199 | 0.594466313 | 1           | AC079336.4             |
| ENSG00000264150 | 0           | 0.743759607 | -2.147682199 | 0.594466313 | 1           | AP005136.1             |
| ENSG00000233316 | 0           | 0.743759607 | -2.147682199 | 0.594466313 | 1           | DSCR10                 |
| ENSG00000148803 | 368.8279568 | 337.3902054 | 0.12897891   | 0.594468191 | 0.703789931 | FUOM                   |
| ENSG00000265479 | 1.466204238 | 3.505182839 | -1.253528316 | 0.594487273 | 0.703789931 | DTX2P1-UPK3BP1-PMS2P11 |
| ENSG00000150394 | 7.267084752 | 10.64187086 | -0.558778031 | 0.594558809 | 0.703842549 | CDH8                   |
| ENSG00000116703 | 3.910414519 | 2.261960402 | 0.81005929   | 0.59459807  | 0.703856955 | PDC                    |
| ENSG00000234353 | 4.501910809 | 6.614844348 | -0.561371812 | 0.594667328 | 0.703897761 | AP000346.2             |
| ENSG00000132286 | 491.7120672 | 445.0068612 | 0.143596976  | 0.594686727 | 0.703897761 | TIMM10B                |
| ENSG00000251583 | 0.923814062 | 2.038888596 | -1.161739412 | 0.594769798 | 0.703964016 | AC008427.1             |
| ENSG00000262732 | 0.89358395  | 1.793307549 | -0.996899166 | 0.594946377 | 0.704130613 | AC010401.1             |
| ENSG00000231841 | 7.927888079 | 10.65119908 | -0.431629995 | 0.594964757 | 0.704130613 | FAM192BP               |
| ENSG00000177383 | 890.8212019 | 822.9728157 | 0.113948484  | 0.595098457 | 0.704256765 | MAGEF1                 |
| ENSG00000278739 | 1.22840902  | 2.975038428 | -1.274957544 | 0.595436054 | 0.704624191 | MIR6859-4              |
| ENSG00000116922 | 296.6614627 | 321.0791434 | -0.114778224 | 0.595557497 | 0.704735804 | C1orf109               |
| ENSG00000265678 | 15.9966128  | 12.25797699 | 0.385967766  | 0.595690407 | 0.704859882 | AC129510.1             |
| ENSG00000234222 | 15.24630151 | 11.52482987 | 0.407281002  | 0.595716612 | 0.704859882 | LIX1L-AS1              |
| ENSG00000231948 | 3.969621095 | 2.292641984 | 0.813824024  | 0.595854682 | 0.704991143 | HS1BP3-IT1             |
| ENSG00000236499 | 12.77347077 | 9.457699839 | 0.424076893  | 0.595953437 | 0.705075876 | LINC00896              |
| ENSG00000275438 | 0.925067711 | 2.375358513 | -1.373682535 | 0.596018859 | 0.705121168 | AL031008.1             |
| ENSG00000285608 | 1.522903516 | 2.772035718 | -0.877475201 | 0.596070498 | 0.70515015  | AL161665.1             |
| ENSG00000240823 | 4.517025865 | 2.954969332 | 0.627764729  | 0.596109775 | 0.705164507 | RN7SL23P               |
| ENSG00000226359 | 2.096777453 | 1.110911105 | 0.937756721  | 0.596323056 | 0.70538469  | ACTG1P24               |
| ENSG00000273368 | 0.601596751 | 1.682349583 | -1.49271597  | 0.596451642 | 1           | AC006566.1             |
| ENSG00000187323 | 5.152684946 | 3.005720009 | 0.791307624  | 0.59664996  | 0.705739249 | DCC                    |
| ENSG00000179299 | 10.92702502 | 8.070397711 | 0.444467132  | 0.596690313 | 0.705754849 | NSUN7                  |
| ENSG00000104760 | 3.344062475 | 5.503933243 | -0.729242799 | 0.596761632 | 0.705807072 | FGL1                   |
| ENSG00000231533 | 1.233423615 | 2.51699806  | -1.035289321 | 0.596801318 | 0.705821879 | AL391840.1             |
| ENSG00000231006 | 1.509042109 | 2.567748738 | -0.755635561 | 0.596883462 | 0.705886897 | RPL7P32                |
| ENSG00000278969 | 2.113146158 | 4.167381792 | -0.970459133 | 0.59695358  | 0.705937687 | AC026310.3             |
| ENSG00000260410 | 2.094270155 | 1.080229524 | 0.960428575  | 0.596992954 | 0.705952116 | AC040169.2             |
| ENSG00000272588 | 7.519995026 | 5.187404028 | 0.549261265  | 0.597140517 | 0.706091371 | AC139887.4             |
| ENSG00000232586 | 2.729857965 | 1.467450118 | 0.905281766  | 0.59716507  | 0.706091371 | KIAA1614-AS1           |
| ENSG00000108587 | 741.1940514 | 792.9423503 | -0.097301998 | 0.597210824 | 0.706113335 | GOSR1                  |
| ENSG00000213399 | 0.615458159 | 1.456837632 | -1.247063385 | 0.597251551 | 1           | AC022210.1             |
| ENSG00000286677 | 1.510295757 | 2.567748738 | -0.754912302 | 0.597261234 | 0.706140801 | AP006545.3             |
| ENSG00000143811 | 682.9378769 | 618.5529514 | 0.142421683  | 0.597310155 | 0.706166506 | PYCR2                  |
| ENSG00000139651 | 745.5726057 | 675.486635  | 0.142940512  | 0.597390821 | 0.70620519  | ZNF740                 |
| ENSG00000270019 | 6.707072223 | 4.688069593 | 0.516943997  | 0.597419472 | 0.70620519  | AC110769.2             |
| ENSG00000140326 | 330.6697369 | 364.9234378 | -0.142200536 | 0.59742442  | 0.70620519  | CDAN1                  |
| ENSG00000286688 | 2.9928687   | 5.12488499  | -0.768961641 | 0.597502945 | 0.706265879 | AP002748.5             |

|                 |             |             |              |             |             |             |
|-----------------|-------------|-------------|--------------|-------------|-------------|-------------|
| ENSG00000187753 | 2.128261214 | 4.117915384 | -0.960829474 | 0.597557596 | 0.706272258 | C9orf153    |
| ENSG00000184809 | 5.232021173 | 2.323323566 | 1.183548847  | 0.597562711 | 0.706272258 | B3GALT5-AS1 |
| ENSG00000106261 | 1745.339721 | 1943.769257 | -0.155202356 | 0.597634394 | 0.706309805 | ZKSCAN1     |
| ENSG00000075290 | 3.634796025 | 2.231278821 | 0.720679093  | 0.597648849 | 0.706309805 | WNT8B       |
| ENSG00000238735 | 1.466204238 | 0.387220594 | 1.927212136  | 0.597693312 | 1           | RNU7-113P   |
| ENSG00000249773 | 1.466204238 | 0.387220594 | 1.927212136  | 0.597693312 | 1           | AC092647.5  |
| ENSG00000215349 | 3.077290793 | 5.023383634 | -0.71233272  | 0.597823324 | 0.70646542  | MRPL3P1     |
| ENSG00000253214 | 5.218159766 | 3.311508345 | 0.662398998  | 0.597834907 | 0.70646542  | AC079209.1  |
| ENSG00000269680 | 5.800880514 | 8.436393334 | -0.537499196 | 0.598159213 | 0.706816506 | AC008760.1  |
| ENSG00000268412 | 2.742465724 | 4.299693123 | -0.652413819 | 0.598233479 | 0.706843918 | TRMT112P6   |
| ENSG00000232801 | 2.150969433 | 4.291392388 | -1.000074313 | 0.598266028 | 0.706843918 | SDCBPP3     |
| ENSG00000234287 | 170.6273773 | 147.3949757 | 0.211370102  | 0.598268728 | 0.706843918 | AC099560.2  |
| ENSG00000236438 | 9.453014159 | 5.737617535 | 0.722767968  | 0.598291236 | 0.706843918 | FAM157A     |
| ENSG00000266941 | 0.61420451  | 1.41669944  | -1.216990138 | 0.598294336 | 1           | AC024592.1  |
| ENSG00000149806 | 5205.65007  | 5636.513816 | -0.114737209 | 0.598563799 | 0.707133778 | FAU         |
| ENSG00000101191 | 1696.920491 | 1580.132361 | 0.102889493  | 0.598795688 | 0.707361695 | DIDO1       |
| ENSG00000212443 | 2.417741115 | 1.436768536 | 0.751843479  | 0.598811174 | 0.707361695 | SNORA53     |
| ENSG00000235720 | 15.98901963 | 20.11463111 | -0.324831492 | 0.59884551  | 0.707370093 | GABPAP      |
| ENSG00000269964 | 6.123097826 | 3.771988857 | 0.682262254  | 0.598917874 | 0.70740289  | MEI4        |
| ENSG00000269480 | 2.977753644 | 1.487519214 | 1.016855867  | 0.598927731 | 0.70740289  | AC020913.2  |
| ENSG00000153933 | 142.8593333 | 166.7532609 | -0.223155294 | 0.599024046 | 0.707484487 | DGKE        |
| ENSG00000250948 | 1.22840902  | 2.578361223 | -1.068676189 | 0.599092322 | 0.707532961 | AC091180.4  |
| ENSG00000092208 | 152.4076964 | 175.4420078 | -0.20463248  | 0.599145442 | 0.707563534 | GEMIN2      |
| ENSG00000249169 | 1.7871679   | 0.672939833 | 1.384999008  | 0.599226212 | 1           | AC026780.1  |
| ENSG00000166140 | 565.8611294 | 518.0028873 | 0.127476022  | 0.599309377 | 0.707724963 | ZFYVE19     |
| ENSG00000198746 | 254.620223  | 231.8482225 | 0.135214737  | 0.599338417 | 0.707727089 | GPATCH3     |
| ENSG00000261231 | 1.466204238 | 0.356539013 | 1.927179361  | 0.599441921 | 1           | LINC02133   |
| ENSG00000253197 | 1.466204238 | 0.356539013 | 1.927179361  | 0.599441921 | 1           | AC117834.1  |
| ENSG00000226617 | 1.466204238 | 0.356539013 | 1.927179361  | 0.599441921 | 1           | RPL21P110   |
| ENSG00000252072 | 1.466204238 | 0.356539013 | 1.927179361  | 0.599441921 | 1           | RNA5SP320   |
| ENSG00000249526 | 2.124500267 | 1.00940975  | 1.04177293   | 0.599869572 | 0.708322108 | AC008667.1  |
| ENSG00000207721 | 16.80828195 | 12.95098592 | 0.378480492  | 0.599911623 | 0.708339569 | MIR186      |
| ENSG00000199024 | 2.373649595 | 1.130980201 | 1.093283263  | 0.599941727 | 0.708342923 | MIR103A2    |
| ENSG00000139168 | 1066.156232 | 1146.25474  | -0.104614053 | 0.600119583 | 0.708520716 | ZCRB1       |
| ENSG00000239789 | 80.86250144 | 91.48791988 | -0.17830048  | 0.600204887 | 0.70858923  | MRPS17      |
| ENSG00000286836 | 1.846374476 | 0.713078025 | 1.366378166  | 0.600410399 | 1           | AC092844.1  |
| ENSG00000004059 | 1545.428999 | 1432.738216 | 0.109144636  | 0.600460946 | 0.708859317 | ARF5        |
| ENSG00000136144 | 688.8656173 | 633.1246881 | 0.121706162  | 0.600506247 | 0.708880585 | RCBTB1      |
| ENSG00000214062 | 1.466204238 | 0.336469917 | 1.927157776  | 0.6006005   | 1           | RPL7P17     |
| ENSG00000228929 | 61.01510798 | 69.21843352 | -0.181409777 | 0.600702169 | 0.709079649 | RPS13P2     |
| ENSG00000200959 | 0           | 0.723690511 | -2.112774589 | 0.600748868 | 1           | SNORA74A    |
| ENSG00000217275 | 0           | 0.723690511 | -2.112774589 | 0.600748868 | 1           | AL031777.1  |
| ENSG00000232627 | 0           | 0.723690511 | -2.112774589 | 0.600748868 | 1           | AC021876.1  |
| ENSG00000227370 | 0           | 0.723690511 | -2.112774589 | 0.600748868 | 1           | AC254562.1  |
| ENSG00000240541 | 0           | 0.723690511 | -2.112774589 | 0.600748868 | 1           | TM4SF1-AS1  |
| ENSG00000259201 | 0           | 0.723690511 | -2.112774589 | 0.600748868 | 1           | AC090971.2  |
| ENSG00000225831 | 0           | 0.723690511 | -2.112774589 | 0.600748868 | 1           | RPS18P1     |
| ENSG00000214125 | 0           | 0.723690511 | -2.112774589 | 0.600748868 | 1           | AC005005.1  |
| ENSG00000204175 | 0           | 0.723690511 | -2.112774589 | 0.600748868 | 1           | GPRIN2      |
| ENSG00000252230 | 0           | 0.723690511 | -2.112774589 | 0.600748868 | 1           | RF00611     |
| ENSG00000280594 | 0           | 0.723690511 | -2.112774589 | 0.600748868 | 1           | BTG3-AS1    |



|                 |             |             |              |             |             |            |
|-----------------|-------------|-------------|--------------|-------------|-------------|------------|
| ENSG00000270321 | 0           | 0.723690511 | -2.112774589 | 0.600748868 | 1           | AC007953.2 |
| ENSG00000249142 | 0           | 0.723690511 | -2.112774589 | 0.600748868 | 1           | AC074134.1 |
| ENSG00000234567 | 0           | 0.723690511 | -2.112774589 | 0.600748868 | 1           | AL024497.2 |
| ENSG00000226869 | 0           | 0.723690511 | -2.112774589 | 0.600748868 | 1           | LHFPL3-AS1 |
| ENSG00000275586 | 0           | 0.723690511 | -2.112774589 | 0.600748868 | 1           | RF00017    |
| ENSG00000222522 | 0           | 0.723690511 | -2.112774589 | 0.600748868 | 1           | RNU6-519P  |
| ENSG00000233367 | 0           | 0.723690511 | -2.112774589 | 0.600748868 | 1           | AL133480.1 |
| ENSG00000225123 | 0           | 0.723690511 | -2.112774589 | 0.600748868 | 1           | AL139008.1 |
| ENSG00000255007 | 0           | 0.723690511 | -2.112774589 | 0.600748868 | 1           | LINC02489  |
| ENSG00000255345 | 0           | 0.723690511 | -2.112774589 | 0.600748868 | 1           | AP002957.1 |
| ENSG00000266754 | 0           | 0.723690511 | -2.112774589 | 0.600748868 | 1           | RN7SL524P  |
| ENSG00000257137 | 0           | 0.723690511 | -2.112774589 | 0.600748868 | 1           | C12orf80   |
| ENSG00000168348 | 0           | 0.723690511 | -2.112774589 | 0.600748868 | 1           | INSM2      |
| ENSG00000259404 | 0           | 0.723690511 | -2.112774589 | 0.600748868 | 1           | EFL1P1     |
| ENSG00000251891 | 0           | 0.723690511 | -2.112774589 | 0.600748868 | 1           | RNU7-79P   |
| ENSG00000237328 | 0           | 0.723690511 | -2.112774589 | 0.600748868 | 1           | RAI1-AS1   |
| ENSG00000214248 | 0           | 0.723690511 | -2.112774589 | 0.600748868 | 1           | AC010336.1 |
| ENSG00000273044 | 0           | 0.723690511 | -2.112774589 | 0.600748868 | 1           | AL022334.2 |
| ENSG00000233956 | 0           | 0.723690511 | -2.112774589 | 0.600748868 | 1           | BTF3P6     |
| ENSG00000277654 | 1.830005771 | 3.423622185 | -0.892871767 | 0.600838633 | 0.709208511 | AC087633.2 |
| ENSG00000229591 | 3.5743358   | 1.834601616 | 0.972245382  | 0.60098709  | 0.709351517 | AC006017.1 |
| ENSG00000238279 | 29.68344116 | 24.04948449 | 0.309205368  | 0.601262298 | 0.709644109 | BX470102.1 |
| ENSG00000184402 | 376.1680108 | 409.583035  | -0.122411398 | 0.601514371 | 0.70990937  | SS18L1     |
| ENSG00000253506 | 5.204298358 | 3.148643826 | 0.713441317  | 0.60166782  | 0.710058217 | NACA2      |
| ENSG00000151657 | 287.2389356 | 310.7699369 | -0.113592301 | 0.601913223 | 0.710315564 | KIN        |
| ENSG00000215580 | 18.63438423 | 10.29478846 | 0.852743286  | 0.60207806  | 0.710442198 | BCORP1     |
| ENSG00000280039 | 8.701805229 | 12.24839199 | -0.484074697 | 0.602101632 | 0.710442198 | RN7SKP23   |
| ENSG00000229358 | 40.8849023  | 34.34298868 | 0.254783086  | 0.602102566 | 0.710442198 | DPY19L1P1  |
| ENSG00000262402 | 1.17296339  | 2.446178286 | -1.055158026 | 0.602373683 | 0.710729821 | MCUR1P1    |
| ENSG00000127362 | 1.233423615 | 2.944356846 | -1.256510898 | 0.602536022 | 0.710881884 | TAS2R3     |
| ENSG00000269910 | 8.743389451 | 11.71020363 | -0.423414423 | 0.602557286 | 0.710881884 | AL049840.2 |
| ENSG00000157349 | 311.291238  | 275.0105999 | 0.178262288  | 0.602713698 | 0.711034127 | DDX19B     |
| ENSG00000165819 | 1013.548751 | 1112.476815 | -0.134378864 | 0.60281374  | 0.711086201 | METTL3     |
| ENSG00000105793 | 370.4386599 | 406.2366068 | -0.132966221 | 0.602830152 | 0.711086201 | GTPBP10    |
| ENSG00000225399 | 10.03218742 | 13.3830966  | -0.421502952 | 0.602839947 | 0.711086201 | AC121247.1 |
| ENSG00000204805 | 5.211891522 | 3.099049024 | 0.734092022  | 0.602981329 | 0.711211947 | AL391987.2 |
| ENSG00000099617 | 3.352909287 | 1.90542139  | 0.838260134  | 0.6030013   | 0.711211947 | EFNA2      |
| ENSG00000207523 | 10.48771948 | 7.285344037 | 0.531304121  | 0.603181394 | 0.711392065 | SNORA66    |
| ENSG00000173744 | 1443.185674 | 1573.684983 | -0.125085341 | 0.603239918 | 0.711428793 | AGFG1      |
| ENSG00000247240 | 26.25155165 | 31.71387678 | -0.270810368 | 0.603289239 | 0.711454664 | UBL7-AS1   |
| ENSG00000274104 | 13.86326572 | 17.15264532 | -0.306946129 | 0.603316743 | 0.711454807 | AC020910.4 |
| ENSG00000236643 | 1.218308559 | 2.50754145  | -1.04361904  | 0.603386692 | 0.711504999 | AL354928.1 |
| ENSG00000257467 | 2.34592678  | 0.713078025 | 1.718045701  | 0.603559963 | 0.71164361  | PPFIA2-AS1 |
| ENSG00000130829 | 1.81990531  | 3.250145181 | -0.836008014 | 0.603579736 | 0.71164361  | DUSP9      |
| ENSG00000119820 | 1438.893892 | 1334.39943  | 0.108935736  | 0.603586413 | 0.71164361  | YIPF4      |
| ENSG00000134594 | 8.902061905 | 13.04290227 | -0.547847478 | 0.603648407 | 0.711684406 | RAB33A     |
| ENSG00000163075 | 6.467952085 | 3.444975551 | 0.898698478  | 0.603700003 | 0.71171294  | CFAP221    |
| ENSG00000219395 | 5.68497466  | 8.317263028 | -0.55397034  | 0.603846586 | 0.711853448 | HSPA8P15   |
| ENSG00000268603 | 0           | 0.713078025 | -2.095049924 | 0.603949147 | 1           | AC053503.5 |
| ENSG00000201619 | 0           | 0.713078025 | -2.095049924 | 0.603949147 | 1           | RF00272    |
| ENSG00000144130 | 0           | 0.713078025 | -2.095049924 | 0.603949147 | 1           | NT5DC4     |

|                 |   |             |              |             |   |            |
|-----------------|---|-------------|--------------|-------------|---|------------|
| ENSG00000239783 | 0 | 0.713078025 | -2.095049924 | 0.603949147 | 1 | AL121776.1 |
| ENSG00000176884 | 0 | 0.713078025 | -2.095049924 | 0.603949147 | 1 | GRIN1      |
| ENSG00000280321 | 0 | 0.713078025 | -2.095049924 | 0.603949147 | 1 | AC129502.1 |
| ENSG00000236512 | 0 | 0.713078025 | -2.095049924 | 0.603949147 | 1 | AL390026.1 |
| ENSG00000280404 | 0 | 0.713078025 | -2.095049924 | 0.603949147 | 1 | AC005086.4 |
| ENSG00000206627 | 0 | 0.713078025 | -2.095049924 | 0.603949147 | 1 | RNU6-969P  |
| ENSG00000259365 | 0 | 0.713078025 | -2.095049924 | 0.603949147 | 1 | AC019254.2 |
| ENSG00000276563 | 0 | 0.713078025 | -2.095049924 | 0.603949147 | 1 | AL359075.1 |
| ENSG00000207195 | 0 | 0.713078025 | -2.095049924 | 0.603949147 | 1 | RF00019    |
| ENSG00000251598 | 0 | 0.713078025 | -2.095049924 | 0.603949147 | 1 | AC093916.1 |
| ENSG00000255364 | 0 | 0.713078025 | -2.095049924 | 0.603949147 | 1 | SMILR      |
| ENSG00000273946 | 0 | 0.713078025 | -2.095049924 | 0.603949147 | 1 | RN7SL733P  |
| ENSG00000214760 | 0 | 0.713078025 | -2.095049924 | 0.603949147 | 1 | RPL21P1    |
| ENSG00000287365 | 0 | 0.713078025 | -2.095049924 | 0.603949147 | 1 | AC068787.4 |
| ENSG00000258560 | 0 | 0.713078025 | -2.095049924 | 0.603949147 | 1 | AL157912.1 |
| ENSG00000267262 | 0 | 0.713078025 | -2.095049924 | 0.603949147 | 1 | AC011444.2 |
| ENSG00000250734 | 0 | 0.713078025 | -2.095049924 | 0.603949147 | 1 | AL391335.1 |
| ENSG00000264934 | 0 | 0.713078025 | -2.095049924 | 0.603949147 | 1 | MIR4265    |
| ENSG00000244730 | 0 | 0.713078025 | -2.095049924 | 0.603949147 | 1 | AC139451.1 |
| ENSG00000286396 | 0 | 0.713078025 | -2.095049924 | 0.603949147 | 1 | AC023049.1 |
| ENSG00000253736 | 0 | 0.713078025 | -2.095049924 | 0.603949147 | 1 | AC022217.3 |
| ENSG00000271098 | 0 | 0.713078025 | -2.095049924 | 0.603949147 | 1 | IMMP1LP3   |
| ENSG00000229497 | 0 | 0.713078025 | -2.095049924 | 0.603949147 | 1 | AC005189.1 |
| ENSG00000268066 | 0 | 0.713078025 | -2.095049924 | 0.603949147 | 1 | FMR1-AS1   |
| ENSG00000283402 | 0 | 0.713078025 | -2.095049924 | 0.603949147 | 1 | AC087821.2 |
| ENSG00000254688 | 0 | 0.713078025 | -2.095049924 | 0.603949147 | 1 | AC013549.2 |
| ENSG00000259711 | 0 | 0.713078025 | -2.095049924 | 0.603949147 | 1 | AC106738.1 |
| ENSG00000259056 | 0 | 0.713078025 | -2.095049924 | 0.603949147 | 1 | DUXAP1     |
| ENSG00000237982 | 0 | 0.713078025 | -2.095049924 | 0.603949147 | 1 | AP006193.1 |
| ENSG00000169903 | 0 | 0.713078025 | -2.095049924 | 0.603949147 | 1 | TM4SF4     |
| ENSG00000284952 | 0 | 0.713078025 | -2.095049924 | 0.603949147 | 1 | AC104472.3 |
| ENSG00000287099 | 0 | 0.713078025 | -2.095049924 | 0.603949147 | 1 | AL121750.1 |
| ENSG00000168412 | 0 | 0.713078025 | -2.095049924 | 0.603949147 | 1 | MTNR1A     |
| ENSG00000250994 | 0 | 0.713078025 | -2.095049924 | 0.603949147 | 1 | AC005355.1 |
| ENSG00000272514 | 0 | 0.713078025 | -2.095049924 | 0.603949147 | 1 | CFAP206    |
| ENSG00000226801 | 0 | 0.713078025 | -2.095049924 | 0.603949147 | 1 | OSTCP8     |
| ENSG00000077498 | 0 | 0.713078025 | -2.095049924 | 0.603949147 | 1 | TYR        |
| ENSG00000198610 | 0 | 0.713078025 | -2.095049924 | 0.603949147 | 1 | AKR1C4     |
| ENSG00000261072 | 0 | 0.713078025 | -2.095049924 | 0.603949147 | 1 | AC084783.1 |
| ENSG00000265574 | 0 | 0.713078025 | -2.095049924 | 0.603949147 | 1 | WDR45BP1   |
| ENSG00000263724 | 0 | 0.713078025 | -2.095049924 | 0.603949147 | 1 | DLGAP1-AS3 |
| ENSG00000207780 | 0 | 0.713078025 | -2.095049924 | 0.603949147 | 1 | MIR648     |
| ENSG00000228184 | 0 | 0.713078025 | -2.095049924 | 0.603949147 | 1 | SNX19P1    |
| ENSG00000234289 | 0 | 0.713078025 | -2.095049924 | 0.603949147 | 1 | H2BFS      |
| ENSG00000236073 | 0 | 0.713078025 | -2.095049924 | 0.603949147 | 1 | AL627311.1 |
| ENSG00000233431 | 0 | 0.713078025 | -2.095049924 | 0.603949147 | 1 | LINC02596  |
| ENSG00000233674 | 0 | 0.713078025 | -2.095049924 | 0.603949147 | 1 | AL451062.2 |
| ENSG00000202259 | 0 | 0.713078025 | -2.095049924 | 0.603949147 | 1 | RNU6-1318P |
| ENSG00000244619 | 0 | 0.713078025 | -2.095049924 | 0.603949147 | 1 | AC243547.1 |
| ENSG00000263987 | 0 | 0.713078025 | -2.095049924 | 0.603949147 | 1 | MIR5698    |
| ENSG00000270361 | 0 | 0.713078025 | -2.095049924 | 0.603949147 | 1 | AL451085.1 |

|                 |   |             |              |             |   |            |
|-----------------|---|-------------|--------------|-------------|---|------------|
| ENSG00000207134 | 0 | 0.713078025 | -2.095049924 | 0.603949147 | 1 | RNU6-106P  |
| ENSG00000261817 | 0 | 0.713078025 | -2.095049924 | 0.603949147 | 1 | AL390718.1 |
| ENSG00000225462 | 0 | 0.713078025 | -2.095049924 | 0.603949147 | 1 | FDPSP1     |
| ENSG00000213041 | 0 | 0.713078025 | -2.095049924 | 0.603949147 | 1 | AC093422.1 |
| ENSG00000228792 | 0 | 0.713078025 | -2.095049924 | 0.603949147 | 1 | AL356310.1 |
| ENSG00000207086 | 0 | 0.713078025 | -2.095049924 | 0.603949147 | 1 | RF00019    |
| ENSG00000226508 | 0 | 0.713078025 | -2.095049924 | 0.603949147 | 1 | LINC01918  |
| ENSG00000202141 | 0 | 0.713078025 | -2.095049924 | 0.603949147 | 1 | RF00019    |
| ENSG00000224323 | 0 | 0.713078025 | -2.095049924 | 0.603949147 | 1 | DPRXP1     |
| ENSG00000225421 | 0 | 0.713078025 | -2.095049924 | 0.603949147 | 1 | AC019330.1 |
| ENSG00000284643 | 0 | 0.713078025 | -2.095049924 | 0.603949147 | 1 | SCYGR2     |
| ENSG00000235993 | 0 | 0.713078025 | -2.095049924 | 0.603949147 | 1 | AC007559.1 |
| ENSG00000199781 | 0 | 0.713078025 | -2.095049924 | 0.603949147 | 1 | RF00019    |
| ENSG00000202341 | 0 | 0.713078025 | -2.095049924 | 0.603949147 | 1 | RNU6-1051P |
| ENSG00000229996 | 0 | 0.713078025 | -2.095049924 | 0.603949147 | 1 | AC093585.1 |
| ENSG00000233570 | 0 | 0.713078025 | -2.095049924 | 0.603949147 | 1 | LINC00690  |
| ENSG00000249580 | 0 | 0.713078025 | -2.095049924 | 0.603949147 | 1 | MTATP6P22  |
| ENSG00000243116 | 0 | 0.713078025 | -2.095049924 | 0.603949147 | 1 | AC092943.1 |
| ENSG00000285218 | 0 | 0.713078025 | -2.095049924 | 0.603949147 | 1 | AC026316.4 |
| ENSG00000200355 | 0 | 0.713078025 | -2.095049924 | 0.603949147 | 1 | RF00139    |
| ENSG00000186038 | 0 | 0.713078025 | -2.095049924 | 0.603949147 | 1 | HTR3E      |
| ENSG00000206600 | 0 | 0.713078025 | -2.095049924 | 0.603949147 | 1 | RNU6-25P   |
| ENSG00000280650 | 0 | 0.713078025 | -2.095049924 | 0.603949147 | 1 | KCNIP4-IT1 |
| ENSG00000228277 | 0 | 0.713078025 | -2.095049924 | 0.603949147 | 1 | UMLILO     |
| ENSG00000238713 | 0 | 0.713078025 | -2.095049924 | 0.603949147 | 1 | RF00019    |
| ENSG00000201818 | 0 | 0.713078025 | -2.095049924 | 0.603949147 | 1 | RNY4P17    |
| ENSG00000280016 | 0 | 0.713078025 | -2.095049924 | 0.603949147 | 1 | AC091905.4 |
| ENSG00000249053 | 0 | 0.713078025 | -2.095049924 | 0.603949147 | 1 | AC106794.1 |
| ENSG00000248930 | 0 | 0.713078025 | -2.095049924 | 0.603949147 | 1 | AC020893.1 |
| ENSG00000270741 | 0 | 0.713078025 | -2.095049924 | 0.603949147 | 1 | PRELID3BP8 |
| ENSG00000145826 | 0 | 0.713078025 | -2.095049924 | 0.603949147 | 1 | LECT2      |
| ENSG00000251018 | 0 | 0.713078025 | -2.095049924 | 0.603949147 | 1 | HMMR-AS1   |
| ENSG00000222431 | 0 | 0.713078025 | -2.095049924 | 0.603949147 | 1 | RNU6-141P  |
| ENSG00000226533 | 0 | 0.713078025 | -2.095049924 | 0.603949147 | 1 | BTBD9-AS1  |
| ENSG00000238490 | 0 | 0.713078025 | -2.095049924 | 0.603949147 | 1 | RF00019    |
| ENSG00000218676 | 0 | 0.713078025 | -2.095049924 | 0.603949147 | 1 | BRD7P4     |
| ENSG00000178397 | 0 | 0.713078025 | -2.095049924 | 0.603949147 | 1 | FAM220A    |
| ENSG00000224946 | 0 | 0.713078025 | -2.095049924 | 0.603949147 | 1 | AC007312.1 |
| ENSG00000227481 | 0 | 0.713078025 | -2.095049924 | 0.603949147 | 1 | AC008080.2 |
| ENSG00000229628 | 0 | 0.713078025 | -2.095049924 | 0.603949147 | 1 | AC073115.1 |
| ENSG00000225546 | 0 | 0.713078025 | -2.095049924 | 0.603949147 | 1 | LINC02476  |
| ENSG00000231114 | 0 | 0.713078025 | -2.095049924 | 0.603949147 | 1 | AC078842.2 |
| ENSG00000232111 | 0 | 0.713078025 | -2.095049924 | 0.603949147 | 1 | AC073488.1 |
| ENSG00000214016 | 0 | 0.713078025 | -2.095049924 | 0.603949147 | 1 | RPSAP61    |
| ENSG00000230241 | 0 | 0.713078025 | -2.095049924 | 0.603949147 | 1 | AC244636.1 |
| ENSG00000207784 | 0 | 0.713078025 | -2.095049924 | 0.603949147 | 1 | MIR542     |
| ENSG00000270255 | 0 | 0.713078025 | -2.095049924 | 0.603949147 | 1 | AC009884.2 |
| ENSG00000254242 | 0 | 0.713078025 | -2.095049924 | 0.603949147 | 1 | AC100849.2 |
| ENSG00000286648 | 0 | 0.713078025 | -2.095049924 | 0.603949147 | 1 | AC068931.1 |
| ENSG00000252710 | 0 | 0.713078025 | -2.095049924 | 0.603949147 | 1 | RNU6-295P  |
| ENSG00000254146 | 0 | 0.713078025 | -2.095049924 | 0.603949147 | 1 | HMGB1P46   |

|                 |   |             |              |             |   |                 |
|-----------------|---|-------------|--------------|-------------|---|-----------------|
| ENSG00000258728 | 0 | 0.713078025 | -2.095049924 | 0.603949147 | 1 | AL162231.3      |
| ENSG00000236658 | 0 | 0.713078025 | -2.095049924 | 0.603949147 | 1 | AL161733.1      |
| ENSG00000255229 | 0 | 0.713078025 | -2.095049924 | 0.603949147 | 1 | AC069287.3      |
| ENSG00000170790 | 0 | 0.713078025 | -2.095049924 | 0.603949147 | 1 | OR10A2          |
| ENSG00000255060 | 0 | 0.713078025 | -2.095049924 | 0.603949147 | 1 | AC009656.1      |
| ENSG00000255539 | 0 | 0.713078025 | -2.095049924 | 0.603949147 | 1 | AP002336.3      |
| ENSG00000226627 | 0 | 0.713078025 | -2.095049924 | 0.603949147 | 1 | SHANK2-AS1      |
| ENSG00000254897 | 0 | 0.713078025 | -2.095049924 | 0.603949147 | 1 | AP003035.1      |
| ENSG00000255506 | 0 | 0.713078025 | -2.095049924 | 0.603949147 | 1 | AP003718.1      |
| ENSG00000252255 | 0 | 0.713078025 | -2.095049924 | 0.603949147 | 1 | RNU2-35P        |
| ENSG00000207612 | 0 | 0.713078025 | -2.095049924 | 0.603949147 | 1 | MIR604          |
| ENSG00000223910 | 0 | 0.713078025 | -2.095049924 | 0.603949147 | 1 | ZNF32-AS3       |
| ENSG00000243349 | 0 | 0.713078025 | -2.095049924 | 0.603949147 | 1 | AL358394.2      |
| ENSG00000222371 | 0 | 0.713078025 | -2.095049924 | 0.603949147 | 1 | RN7SKP202       |
| ENSG00000234474 | 0 | 0.713078025 | -2.095049924 | 0.603949147 | 1 | MIR3663HG       |
| ENSG00000222588 | 0 | 0.713078025 | -2.095049924 | 0.603949147 | 1 | RF00413         |
| ENSG00000213170 | 0 | 0.713078025 | -2.095049924 | 0.603949147 | 1 | SAR1AP2         |
| ENSG00000285238 | 0 | 0.713078025 | -2.095049924 | 0.603949147 | 1 | AC006064.6      |
| ENSG00000282080 | 0 | 0.713078025 | -2.095049924 | 0.603949147 | 1 | AC006511.4      |
| ENSG00000257924 | 0 | 0.713078025 | -2.095049924 | 0.603949147 | 1 | LINC02416       |
| ENSG00000255886 | 0 | 0.713078025 | -2.095049924 | 0.603949147 | 1 | AC020611.2      |
| ENSG00000257910 | 0 | 0.713078025 | -2.095049924 | 0.603949147 | 1 | AC124784.1      |
| ENSG00000257604 | 0 | 0.713078025 | -2.095049924 | 0.603949147 | 1 | AC027288.2      |
| ENSG00000277358 | 0 | 0.713078025 | -2.095049924 | 0.603949147 | 1 | AL138693.1      |
| ENSG00000280348 | 0 | 0.713078025 | -2.095049924 | 0.603949147 | 1 | AL138713.1      |
| ENSG00000287481 | 0 | 0.713078025 | -2.095049924 | 0.603949147 | 1 | AL161663.1      |
| ENSG00000260046 | 0 | 0.713078025 | -2.095049924 | 0.603949147 | 1 | AL162632.3      |
| ENSG00000242941 | 0 | 0.713078025 | -2.095049924 | 0.603949147 | 1 | RPL12P7         |
| ENSG00000287913 | 0 | 0.713078025 | -2.095049924 | 0.603949147 | 1 | AL132986.1      |
| ENSG00000283627 | 0 | 0.713078025 | -2.095049924 | 0.603949147 | 1 | AL137785.1      |
| ENSG00000200506 | 0 | 0.713078025 | -2.095049924 | 0.603949147 | 1 | RF00019         |
| ENSG00000202048 | 0 | 0.713078025 | -2.095049924 | 0.603949147 | 1 | SNORD114-20     |
| ENSG00000215957 | 0 | 0.713078025 | -2.095049924 | 0.603949147 | 1 | MIR300          |
| ENSG00000221525 | 0 | 0.713078025 | -2.095049924 | 0.603949147 | 1 | MIR1185-1       |
| ENSG00000199020 | 0 | 0.713078025 | -2.095049924 | 0.603949147 | 1 | MIR381          |
| ENSG00000207978 | 0 | 0.713078025 | -2.095049924 | 0.603949147 | 1 | MIR154          |
| ENSG00000259721 | 0 | 0.713078025 | -2.095049924 | 0.603949147 | 1 | AC090877.2      |
| ENSG00000250379 | 0 | 0.713078025 | -2.095049924 | 0.603949147 | 1 | AC020659.2      |
| ENSG00000259286 | 0 | 0.713078025 | -2.095049924 | 0.603949147 | 1 | AC087639.1      |
| ENSG00000200677 | 0 | 0.713078025 | -2.095049924 | 0.603949147 | 1 | RF00093         |
| ENSG00000287061 | 0 | 0.713078025 | -2.095049924 | 0.603949147 | 1 | AC124248.2      |
| ENSG00000266994 | 0 | 0.713078025 | -2.095049924 | 0.603949147 | 1 | AC020663.1      |
| ENSG00000275504 | 0 | 0.713078025 | -2.095049924 | 0.603949147 | 1 | RF00066         |
| ENSG00000260466 | 0 | 0.713078025 | -2.095049924 | 0.603949147 | 1 | AC126696.2      |
| ENSG00000263015 | 0 | 0.713078025 | -2.095049924 | 0.603949147 | 1 | AC015853.2      |
| ENSG00000161939 | 0 | 0.713078025 | -2.095049924 | 0.603949147 | 1 | RNASEK-C17orf49 |
| ENSG00000263051 | 0 | 0.713078025 | -2.095049924 | 0.603949147 | 1 | AC087501.3      |
| ENSG00000253058 | 0 | 0.713078025 | -2.095049924 | 0.603949147 | 1 | RNA5SP437       |
| ENSG00000240305 | 0 | 0.713078025 | -2.095049924 | 0.603949147 | 1 | AC091152.1      |
| ENSG00000255851 | 0 | 0.713078025 | -2.095049924 | 0.603949147 | 1 | RF00017         |
| ENSG00000186244 | 0 | 0.713078025 | -2.095049924 | 0.603949147 | 1 | AC091180.1      |

|                 |             |             |              |             |             |            |
|-----------------|-------------|-------------|--------------|-------------|-------------|------------|
| ENSG00000267095 | 0           | 0.713078025 | -2.095049924 | 0.603949147 | 1           | AC025048.1 |
| ENSG00000239823 | 0           | 0.713078025 | -2.095049924 | 0.603949147 | 1           | RF00019    |
| ENSG00000201852 | 0           | 0.713078025 | -2.095049924 | 0.603949147 | 1           | RNU6-702P  |
| ENSG00000279366 | 0           | 0.713078025 | -2.095049924 | 0.603949147 | 1           | AC120349.2 |
| ENSG00000287518 | 0           | 0.713078025 | -2.095049924 | 0.603949147 | 1           | AC100778.4 |
| ENSG00000101323 | 0           | 0.713078025 | -2.095049924 | 0.603949147 | 1           | HAO1       |
| ENSG00000241229 | 0           | 0.713078025 | -2.095049924 | 0.603949147 | 1           | RN7SL443P  |
| ENSG00000287570 | 0           | 0.713078025 | -2.095049924 | 0.603949147 | 1           | AL035447.1 |
| ENSG00000278643 | 0           | 0.713078025 | -2.095049924 | 0.603949147 | 1           | RF02271    |
| ENSG00000267714 | 0           | 0.713078025 | -2.095049924 | 0.603949147 | 1           | AC008738.4 |
| ENSG00000265675 | 0           | 0.713078025 | -2.095049924 | 0.603949147 | 1           | RN7SL708P  |
| ENSG00000271375 | 0           | 0.713078025 | -2.095049924 | 0.603949147 | 1           | AC134879.2 |
| ENSG00000226863 | 0           | 0.713078025 | -2.095049924 | 0.603949147 | 1           | SHROOM2P1  |
| ENSG00000237347 | 0           | 0.713078025 | -2.095049924 | 0.603949147 | 1           | AC004461.1 |
| ENSG00000208023 | 0           | 0.713078025 | -2.095049924 | 0.603949147 | 1           | MIR185     |
| ENSG00000224256 | 0           | 0.713078025 | -2.095049924 | 0.603949147 | 1           | Z93930.1   |
| ENSG00000212479 | 0           | 0.713078025 | -2.095049924 | 0.603949147 | 1           | RF00012    |
| ENSG00000228349 | 0           | 0.713078025 | -2.095049924 | 0.603949147 | 1           | RPS26P4    |
| ENSG00000233767 | 0           | 0.713078025 | -2.095049924 | 0.603949147 | 1           | PSMA6P3    |
| ENSG00000149089 | 442.6051818 | 489.085726  | -0.143628878 | 0.604060697 | 0.712073546 | APIP       |
| ENSG00000095627 | 12.63256286 | 7.176826216 | 0.808703892  | 0.60428284  | 0.712303093 | TDRD1      |
| ENSG00000240589 | 1.49643435  | 2.975038428 | -0.980273702 | 0.604319571 | 0.712314072 | RN7SL258P  |
| ENSG00000274723 | 2.9928687   | 1.4981317   | 1.015607571  | 0.604557508 | 0.712562202 | AC079906.1 |
| ENSG00000106686 | 20.93886933 | 15.80804992 | 0.402556554  | 0.604693274 | 0.71268989  | SPATA6L    |
| ENSG00000133641 | 389.2487263 | 427.2710902 | -0.13455741  | 0.604735383 | 0.712707189 | C12orf29   |
| ENSG00000176029 | 3.646150135 | 2.171071533 | 0.751146062  | 0.604799097 | 0.712749947 | C11orf16   |
| ENSG00000176076 | 1.843867178 | 3.220619475 | -0.810960462 | 0.605248867 | 0.713142021 | KCNE5      |
| ENSG00000131724 | 1907.805078 | 2195.292979 | -0.202594665 | 0.605254197 | 0.713142021 | IL13RA1    |
| ENSG00000277152 | 8.067399797 | 4.851062506 | 0.727445888  | 0.605282012 | 0.713142021 | AC110048.2 |
| ENSG00000227252 | 48.03915797 | 56.00688736 | -0.223594154 | 0.605283583 | 0.713142021 | AC012063.1 |
| ENSG00000248367 | 10.99389603 | 7.898076582 | 0.475512959  | 0.605303264 | 0.713142021 | AC008610.1 |
| ENSG00000200674 | 2.68075185  | 1.467450118 | 0.883758017  | 0.605312948 | 0.713142021 | RN7SKP160  |
| ENSG00000105672 | 15.11932628 | 19.03812601 | -0.337006726 | 0.605323929 | 0.713142021 | ETV2       |
| novel.103       | 2.450478525 | 1.161661783 | 1.103686298  | 0.605470708 | 0.713282601 | -          |
| ENSG00000139437 | 519.057546  | 559.5431434 | -0.108246755 | 0.605507871 | 0.713294037 | TCHP       |
| ENSG00000273920 | 1.22840902  | 2.537067156 | -1.049186531 | 0.605638543 | 0.713415088 | AC103858.2 |
| ENSG00000143373 | 544.0775403 | 602.344089  | -0.146191831 | 0.605665548 | 0.713415088 | ZNF687     |
| ENSG00000104643 | 16.40192728 | 19.79005795 | -0.271237744 | 0.605712126 | 0.713437608 | MTMR9      |
| ENSG00000183644 | 3.05966844  | 4.809640044 | -0.647346015 | 0.605865345 | 0.71356015  | C11orf88   |
| ENSG00000180660 | 42.92394029 | 49.20427628 | -0.198480371 | 0.605871095 | 0.71356015  | MAB21L1    |
| ENSG00000268157 | 0.601596751 | 1.396630344 | -1.220017871 | 0.605878697 | 1           | AC010524.1 |
| ENSG00000254469 | 31.85113531 | 26.77089792 | 0.248248411  | 0.606020709 | 0.713704004 | AP002495.1 |
| ENSG00000286408 | 19.18096263 | 15.27559376 | 0.323329283  | 0.606077477 | 0.713738507 | AC113410.4 |
| ENSG00000284633 | 10.80735822 | 7.081057057 | 0.618594183  | 0.606124886 | 0.713761984 | AL031590.1 |
| ENSG00000270917 | 2.098031101 | 3.771988857 | -0.853150676 | 0.606259236 | 0.713887835 | AL161911.1 |
| ENSG00000198919 | 404.0470879 | 346.6888588 | 0.220154623  | 0.606339807 | 0.713942659 | DZIP3      |
| ENSG00000180929 | 5.160206839 | 3.515795324 | 0.541773905  | 0.606360752 | 0.713942659 | GPR62      |
| ENSG00000258884 | 0.615458159 | 1.386017859 | -1.191028316 | 0.606400649 | 1           | LINC02321  |
| ENSG00000236051 | 0.615458159 | 1.386017859 | -1.191028316 | 0.606400649 | 1           | MYCBP2-AS1 |
| ENSG00000260274 | 16.95943251 | 12.12108934 | 0.477425163  | 0.606463811 | 0.713978587 | AC068338.2 |
| ENSG00000088727 | 60.61222952 | 68.41587929 | -0.176864546 | 0.606465482 | 0.713978587 | KIF9       |

|                 |             |             |              |             |             |              |
|-----------------|-------------|-------------|--------------|-------------|-------------|--------------|
| ENSG00000103365 | 1108.127951 | 999.1970137 | 0.14957123   | 0.606484288 | 0.713978587 | GGA2         |
| ENSG00000176236 | 2.139615324 | 1.00940975  | 1.051973861  | 0.60650119  | 0.713978587 | RPP38-DT     |
| ENSG00000286638 | 0.923814062 | 1.793307549 | -0.966289893 | 0.606542313 | 0.713994646 | AC123595.2   |
| ENSG0000040199  | 320.4693026 | 357.9068732 | -0.160216868 | 0.606652365 | 0.714090377 | PHLPP2       |
| ENSG00000269397 | 11.91262423 | 9.079807461 | 0.394012741  | 0.606678607 | 0.714090377 | AC011503.2   |
| ENSG00000234450 | 3.01557692  | 1.518200796 | 1.01004847   | 0.606968498 | 0.714399227 | AC005534.2   |
| ENSG00000154447 | 483.7970312 | 546.1716995 | -0.175028937 | 0.607247151 | 0.714694823 | SH3RF1       |
| ENSG00000164715 | 396.1092854 | 357.709975  | 0.147296146  | 0.607427987 | 0.714875274 | LMTK2        |
| ENSG00000267905 | 1.233423615 | 3.047014077 | -1.301790847 | 0.60747429  | 0.714897384 | AC008750.3   |
| ENSG00000237903 | 3.984736151 | 2.272572888 | 0.826792079  | 0.607527868 | 0.714928052 | AC004000.1   |
| ENSG00000139304 | 10.36708377 | 14.51536108 | -0.493089905 | 0.607560733 | 0.714934345 | PTPRQ        |
| ENSG00000230578 | 2.46684723  | 0.774441189 | 1.68859291   | 0.607644415 | 0.715000433 | AC234781.5   |
| ENSG00000249244 | 1.774560141 | 3.250145181 | -0.863799705 | 0.607713253 | 0.715049048 | AC110373.1   |
| ENSG00000230882 | 3.385646697 | 5.543943041 | -0.709597384 | 0.607870977 | 0.715163882 | AC005077.4   |
| ENSG00000130758 | 537.7777641 | 468.3034078 | 0.200161419  | 0.607902115 | 0.715163882 | MAP3K10      |
| ENSG00000227449 | 7.333884492 | 4.514592589 | 0.689995438  | 0.607924146 | 0.715163882 | FGF7P6       |
| ENSG00000233589 | 1.526664462 | 2.862924587 | -0.911285937 | 0.607927712 | 0.715163882 | AL138789.1   |
| ENSG00000198053 | 1573.28377  | 1402.567323 | 0.165804499  | 0.607948481 | 0.715163882 | SIRPA        |
| ENSG00000126460 | 5.787019107 | 3.974991568 | 0.543566636  | 0.60802501  | 0.715193313 | PRRG2        |
| ENSG00000084636 | 5137.747833 | 5972.279826 | -0.217096025 | 0.608028555 | 0.715193313 | COL16A1      |
| ENSG00000232059 | 1.522903516 | 2.882993683 | -0.922338511 | 0.608092235 | 0.715197048 | AL451007.1   |
| ENSG00000164631 | 507.6277772 | 469.2658381 | 0.113835417  | 0.608098028 | 0.715197048 | ZNF12        |
| ENSG00000236318 | 2.698374204 | 1.518200796 | 0.858490437  | 0.608129071 | 0.715197048 | AC019117.2   |
| ENSG00000162804 | 571.999195  | 788.9847809 | -0.464170797 | 0.608141841 | 0.715197048 | SNED1        |
| ENSG00000145975 | 2.12199297  | 3.546476906 | -0.745129806 | 0.608380088 | 0.71544485  | FAM217A      |
| ENSG00000168255 | 56.04957375 | 46.49206267 | 0.273540602  | 0.608514171 | 0.715539695 | POLR2J3      |
| ENSG00000069275 | 5480.121488 | 6077.302801 | -0.149282139 | 0.608515821 | 0.715539695 | NUCKS1       |
| ENSG00000100997 | 2392.186918 | 2241.151166 | 0.094010549  | 0.60860174  | 0.715608337 | ABHD12       |
| ENSG00000283108 | 6.315547875 | 8.469515061 | -0.426969041 | 0.608732198 | 0.715729341 | AC011451.3   |
| ENSG00000260105 | 0.908699006 | 1.813376645 | -0.994019298 | 0.608813316 | 0.715792323 | AOC4P        |
| ENSG00000256196 | 2.138361675 | 3.718798035 | -0.792554615 | 0.608942433 | 0.715882774 | AP003721.1   |
| novel.560       | 19.6379618  | 12.99716028 | 0.588481047  | 0.608960541 | 0.715882774 | -            |
| ENSG00000135917 | 17.73746661 | 22.95864248 | -0.371404827 | 0.608972911 | 0.715882774 | SLC19A3      |
| ENSG00000144401 | 206.872609  | 177.191196  | 0.222529543  | 0.609106757 | 0.716007722 | METTL21A     |
| ENSG00000259726 | 5.029185928 | 2.742510011 | 0.866024637  | 0.609171052 | 0.716032799 | CSPG4P11     |
| ENSG00000151893 | 1088.029233 | 982.3402462 | 0.147650403  | 0.60918321  | 0.716032799 | CACUL1       |
| ENSG00000198258 | 2064.630898 | 2233.830039 | -0.113570023 | 0.609229068 | 0.716054305 | UBL5         |
| ENSG00000260310 | 1.801029308 | 0.713078025 | 1.3344942    | 0.609346398 | 1           | AC027277.2   |
| ENSG00000137509 | 1784.154663 | 1609.907905 | 0.148290489  | 0.609373032 | 0.716191112 | PRCP         |
| ENSG00000286813 | 4.7800366   | 3.189937893 | 0.581600825  | 0.609465091 | 0.716266908 | AC015871.6   |
| ENSG00000273694 | 0.61420451  | 2.0188195   | -1.726603398 | 0.609512119 | 1           | RF00004      |
| ENSG00000186566 | 1189.35336  | 1077.869084 | 0.142235944  | 0.609514883 | 0.716293024 | GPATCH8      |
| ENSG00000245384 | 1.814890715 | 0.713078025 | 1.344349655  | 0.609553972 | 1           | CXXC4-AS1    |
| ENSG00000142632 | 197.4224028 | 179.8422564 | 0.135335912  | 0.609694351 | 0.716471524 | ARHGEF19     |
| ENSG00000214019 | 4.220024071 | 2.802717299 | 0.578628357  | 0.609784798 | 0.716545402 | AL034370.1   |
| ENSG00000102317 | 4671.778076 | 4263.999967 | 0.131723824  | 0.609827078 | 0.716562676 | RBM3         |
| ENSG00000215187 | 8.846687547 | 6.298443528 | 0.478763924  | 0.609916103 | 0.716634872 | FAM166B      |
| ENSG00000231527 | 26.86450251 | 21.03572053 | 0.34817232   | 0.609995235 | 0.716664716 | FAM27C       |
| ENSG00000232699 | 2.140868972 | 1.00940975  | 1.053315363  | 0.609996672 | 0.716664716 | BDH2P1       |
| ENSG00000263412 | 18.85247708 | 23.31775003 | -0.311773739 | 0.610114686 | 0.716770955 | AC004477.1   |
| ENSG00000249884 | 0           | 0.693008929 | -2.059180836 | 0.610446217 | 1           | RNF103-CHMP3 |

|                  |   |             |              |             |   |            |
|------------------|---|-------------|--------------|-------------|---|------------|
| ENSG00000070031  | 0 | 0.693008929 | -2.059180836 | 0.610446217 | 1 | SCT        |
| ENSG000000271390 | 0 | 0.693008929 | -2.059180836 | 0.610446217 | 1 | AP003973.2 |
| ENSG000000231274 | 0 | 0.693008929 | -2.059180836 | 0.610446217 | 1 | SBK3       |
| ENSG000000226928 | 0 | 0.693008929 | -2.059180836 | 0.610446217 | 1 | RPS14P4    |
| ENSG000000229010 | 0 | 0.693008929 | -2.059180836 | 0.610446217 | 1 | AL161672.1 |
| ENSG000000214875 | 0 | 0.693008929 | -2.059180836 | 0.610446217 | 1 | MED28P1    |
| ENSG000000197153 | 0 | 0.693008929 | -2.059180836 | 0.610446217 | 1 | HIST1H3J   |
| ENSG000000286972 | 0 | 0.693008929 | -2.059180836 | 0.610446217 | 1 | AL035665.2 |
| ENSG000000224751 | 0 | 0.693008929 | -2.059180836 | 0.610446217 | 1 | SHMT1P1    |
| ENSG000000234913 | 0 | 0.693008929 | -2.059180836 | 0.610446217 | 1 | AC016027.2 |
| ENSG000000286115 | 0 | 0.693008929 | -2.059180836 | 0.610446217 | 1 | AC010092.1 |
| ENSG000000216915 | 0 | 0.693008929 | -2.059180836 | 0.610446217 | 1 | GPR89P     |
| ENSG000000229211 | 0 | 0.693008929 | -2.059180836 | 0.610446217 | 1 | KCTD9P6    |
| ENSG000000264860 | 0 | 0.693008929 | -2.059180836 | 0.610446217 | 1 | AC097641.1 |
| ENSG000000252391 | 0 | 0.693008929 | -2.059180836 | 0.610446217 | 1 | RNU6-638P  |
| ENSG000000101098 | 0 | 0.693008929 | -2.059180836 | 0.610446217 | 1 | RIMS4      |
| ENSG000000236546 | 0 | 0.693008929 | -2.059180836 | 0.610446217 | 1 | AL033527.2 |
| ENSG000000225561 | 0 | 0.693008929 | -2.059180836 | 0.610446217 | 1 | LINC01710  |
| ENSG000000252246 | 0 | 0.693008929 | -2.059180836 | 0.610446217 | 1 | RNA5SP92   |
| ENSG000000238062 | 0 | 0.693008929 | -2.059180836 | 0.610446217 | 1 | SPATA3-AS1 |
| ENSG000000223991 | 0 | 0.693008929 | -2.059180836 | 0.610446217 | 1 | AC104809.1 |
| ENSG000000240175 | 0 | 0.693008929 | -2.059180836 | 0.610446217 | 1 | MAGI1-AS1  |
| ENSG000000242510 | 0 | 0.693008929 | -2.059180836 | 0.610446217 | 1 | NDUFB4P1   |
| ENSG000000248837 | 0 | 0.693008929 | -2.059180836 | 0.610446217 | 1 | AC097512.1 |
| ENSG000000163288 | 0 | 0.693008929 | -2.059180836 | 0.610446217 | 1 | GABRB1     |
| ENSG000000250328 | 0 | 0.693008929 | -2.059180836 | 0.610446217 | 1 | AC022101.1 |
| ENSG000000251169 | 0 | 0.693008929 | -2.059180836 | 0.610446217 | 1 | LINC01843  |
| ENSG000000253811 | 0 | 0.693008929 | -2.059180836 | 0.610446217 | 1 | AC136424.2 |
| ENSG000000273997 | 0 | 0.693008929 | -2.059180836 | 0.610446217 | 1 | AL355365.1 |
| ENSG000000286703 | 0 | 0.693008929 | -2.059180836 | 0.610446217 | 1 | AC005682.2 |
| ENSG000000224865 | 0 | 0.693008929 | -2.059180836 | 0.610446217 | 1 | AC009518.1 |
| ENSG000000234050 | 0 | 0.693008929 | -2.059180836 | 0.610446217 | 1 | Z95624.1   |
| ENSG000000230312 | 0 | 0.693008929 | -2.059180836 | 0.610446217 | 1 | AC234782.1 |
| ENSG000000199313 | 0 | 0.693008929 | -2.059180836 | 0.610446217 | 1 | RNU4-82P   |
| ENSG000000222421 | 0 | 0.693008929 | -2.059180836 | 0.610446217 | 1 | RF00019    |
| ENSG000000283415 | 0 | 0.693008929 | -2.059180836 | 0.610446217 | 1 | AC087280.2 |
| ENSG000000241228 | 0 | 0.693008929 | -2.059180836 | 0.610446217 | 1 | RPL12P31   |
| ENSG000000199535 | 0 | 0.693008929 | -2.059180836 | 0.610446217 | 1 | RNA5SP305  |
| ENSG000000256564 | 0 | 0.693008929 | -2.059180836 | 0.610446217 | 1 | AC007552.2 |
| ENSG000000244712 | 0 | 0.693008929 | -2.059180836 | 0.610446217 | 1 | AC084754.1 |
| ENSG000000256943 | 0 | 0.693008929 | -2.059180836 | 0.610446217 | 1 | AC148477.3 |
| ENSG000000279461 | 0 | 0.693008929 | -2.059180836 | 0.610446217 | 1 | AC005480.2 |
| ENSG000000221614 | 0 | 0.693008929 | -2.059180836 | 0.610446217 | 1 | MIR1185-2  |
| ENSG000000202560 | 0 | 0.693008929 | -2.059180836 | 0.610446217 | 1 | MIR539     |
| ENSG000000270702 | 0 | 0.693008929 | -2.059180836 | 0.610446217 | 1 | AC073657.2 |
| ENSG000000201077 | 0 | 0.693008929 | -2.059180836 | 0.610446217 | 1 | RNU6-188P  |
| ENSG000000206903 | 0 | 0.693008929 | -2.059180836 | 0.610446217 | 1 | SNORA24B   |
| ENSG000000260601 | 0 | 0.693008929 | -2.059180836 | 0.610446217 | 1 | AC131391.1 |
| ENSG000000140798 | 0 | 0.693008929 | -2.059180836 | 0.610446217 | 1 | ABCC12     |
| ENSG000000262141 | 0 | 0.693008929 | -2.059180836 | 0.610446217 | 1 | AC040162.2 |
| ENSG000000267200 | 0 | 0.693008929 | -2.059180836 | 0.610446217 | 1 | MIR132     |

|                 |             |             |              |             |             |            |
|-----------------|-------------|-------------|--------------|-------------|-------------|------------|
| ENSG00000263750 | 0           | 0.693008929 | -2.059180836 | 0.610446217 | 1           | MIR548AV   |
| ENSG00000283206 | 0           | 0.693008929 | -2.059180836 | 0.610446217 | 1           | MIR941-1   |
| ENSG00000268108 | 0           | 0.693008929 | -2.059180836 | 0.610446217 | 1           | AC008687.2 |
| ENSG00000133460 | 0           | 0.693008929 | -2.059180836 | 0.610446217 | 1           | SLC2A11    |
| ENSG00000237862 | 0           | 0.693008929 | -2.059180836 | 0.610446217 | 1           | Z94160.1   |
| ENSG00000175189 | 1.510295757 | 0.672939833 | 1.130446334  | 0.610525479 | 1           | INHBC      |
| ENSG00000258736 | 1.510295757 | 0.672939833 | 1.130446334  | 0.610525479 | 1           | AL583722.3 |
| ENSG00000251870 | 1.510295757 | 0.672939833 | 1.130446334  | 0.610525479 | 1           | RNU2-69P   |
| ENSG00000234764 | 1.510295757 | 0.672939833 | 1.130446334  | 0.610525479 | 1           | E2F6P1     |
| ENSG00000237461 | 2.124500267 | 3.291439249 | -0.624251412 | 0.610615943 | 0.717327401 | AL359710.1 |
| ENSG00000240634 | 2.125753916 | 3.291439249 | -0.623729613 | 0.610950327 | 0.717687772 | AC145285.1 |
| novel.844       | 3.386900346 | 5.493192363 | -0.697775147 | 0.611053042 | 0.717775978 | -          |
| ENSG00000267682 | 4.822874471 | 6.836760279 | -0.501268384 | 0.611153987 | 0.717862097 | AC016590.2 |
| ENSG00000122912 | 350.2312967 | 376.9807238 | -0.106509367 | 0.611513631 | 0.718252064 | SLC25A16   |
| ENSG00000135605 | 37.54495678 | 46.12858841 | -0.294316444 | 0.611589739 | 0.718308983 | TEC        |
| ENSG00000234911 | 23.59816661 | 18.45607504 | 0.354072441  | 0.611750343 | 0.718465133 | TEX21P     |
| ENSG00000232618 | 10.58843901 | 7.990121327 | 0.411284689  | 0.611972957 | 0.718680972 | AL355304.1 |
| ENSG00000272518 | 7.26959205  | 9.354914215 | -0.3629913   | 0.611989447 | 0.718680972 | AC036214.2 |
| ENSG00000009307 | 11625.52111 | 10866.66891 | 0.097398519  | 0.612041719 | 0.718709871 | CSDE1      |
| ENSG00000108439 | 293.4383207 | 263.3114751 | 0.15509828   | 0.612318016 | 0.719001825 | PNPO       |
| ENSG00000274364 | 0.921306765 | 2.231278821 | -1.274613661 | 0.612600309 | 0.719300793 | AL110115.1 |
| ENSG00000265916 | 1.230916317 | 2.415496705 | -0.988494482 | 0.612878947 | 0.719595441 | AC015818.5 |
| ENSG00000269806 | 0.600343103 | 1.365948763 | -1.197405622 | 0.612914908 | 1           | BICRA-AS1  |
| ENSG00000265195 | 0.600343103 | 1.365948763 | -1.197405622 | 0.612914908 | 1           | MIR4312    |
| ENSG00000207185 | 3.988497097 | 2.0188195   | 0.962529068  | 0.61296138  | 0.719628954 | RNU6-1157P |
| ENSG00000237821 | 7.296061216 | 5.421216714 | 0.430515099  | 0.612962886 | 0.719628954 | AC083873.1 |
| ENSG00000259378 | 1.774560141 | 0.672939833 | 1.37719746   | 0.6130326   | 1           | DCAF13P3   |
| ENSG00000271973 | 3.871337594 | 5.900482053 | -0.595070672 | 0.613317974 | 0.720013298 | AC141002.1 |
| ENSG00000260236 | 36.45516183 | 29.0684202  | 0.321820787  | 0.613377181 | 0.720050268 | AC099778.1 |
| ENSG00000071553 | 2645.482241 | 2846.094046 | -0.105358083 | 0.613416693 | 0.720064117 | ATP6AP1    |
| ENSG00000255231 | 0.601596751 | 1.365948763 | -1.195454799 | 0.613483533 | 1           | MRPS36P4   |
| ENSG00000183255 | 6729.796289 | 6129.299219 | 0.134816756  | 0.61350867  | 0.720139548 | PTTG1IP    |
| ENSG00000173848 | 751.6523219 | 862.2126179 | -0.197739061 | 0.613665419 | 0.720290999 | NET1       |
| ENSG00000286181 | 3.700270845 | 1.753169357 | 1.069583505  | 0.613906689 | 0.720541637 | AC232271.3 |
| ENSG00000261096 | 4.777529303 | 3.210006989 | 0.574865334  | 0.614076695 | 0.720708615 | AC073476.3 |
| ENSG00000166997 | 408.263593  | 444.8526357 | -0.123838623 | 0.614193136 | 0.720812714 | CNPY4      |
| ENSG00000274156 | 2.138361675 | 3.81084278  | -0.823071337 | 0.614333532 | 0.720944915 | AC008121.2 |
| ENSG00000241352 | 1.538018572 | 3.005720009 | -0.962123809 | 0.61436847  | 0.720953352 | AC007688.1 |
| ENSG00000135090 | 1005.304538 | 912.4834069 | 0.139662759  | 0.614437467 | 0.721001753 | TAOK3      |
| ENSG00000105397 | 2248.015354 | 2410.846237 | -0.100770612 | 0.614531163 | 0.721079132 | TYK2       |
| ENSG00000254614 | 47.03056581 | 40.17380684 | 0.230345246  | 0.614671508 | 0.721211238 | AP003068.2 |
| ENSG00000165185 | 50.91765919 | 41.96120661 | 0.280934839  | 0.614830802 | 0.721365564 | KIAA1958   |
| ENSG00000239082 | 2.403879708 | 1.467450118 | 0.729106695  | 0.614892568 | 0.721405455 | RNU7-170P  |
| ENSG00000261471 | 2.698374204 | 4.248942446 | -0.655938887 | 0.614963628 | 0.721456246 | AC092145.1 |
| ENSG00000176406 | 35.84192624 | 44.04395782 | -0.296912895 | 0.615221414 | 0.721726083 | RIMS2      |
| ENSG00000138942 | 832.8873747 | 767.0377159 | 0.119244258  | 0.615344403 | 0.72183777  | RNF185     |
| ENSG00000203356 | 1.522903516 | 0.672939833 | 1.141735655  | 0.61556942  | 1           | LINC01562  |
| ENSG00000242531 | 1.522903516 | 0.672939833 | 1.141735655  | 0.61556942  | 1           | AC083798.1 |
| ENSG00000165548 | 3.636049674 | 2.261960402 | 0.706609377  | 0.615672884 | 0.722190491 | TMEM63C    |
| ENSG00000225218 | 3.312578714 | 2.089639274 | 0.649962823  | 0.615712951 | 0.722204884 | AP001628.1 |
| ENSG00000125818 | 2051.125565 | 1922.68354  | 0.093261853  | 0.615843186 | 0.722325033 | PSMF1      |



|                 |             |             |              |             |             |            |
|-----------------|-------------|-------------|--------------|-------------|-------------|------------|
| ENSG00000163904 | 738.1269601 | 690.8927076 | 0.09551707   | 0.61589133  | 0.722348892 | SENP2      |
| ENSG00000259420 | 2.752566185 | 1.345879667 | 1.006771159  | 0.616348091 | 0.722851973 | AC046168.2 |
| ENSG00000282304 | 0.908699006 | 1.722487775 | -0.938951347 | 0.616387797 | 1           | AC140479.5 |
| ENSG00000243680 | 2.446717578 | 1.467450118 | 0.747044     | 0.616456918 | 0.722946971 | RPL37P23   |
| ENSG00000229519 | 3.561728042 | 5.350396941 | -0.581741    | 0.616554319 | 0.722949932 | AL591866.1 |
| ENSG00000127804 | 507.0286168 | 554.2609293 | -0.128937262 | 0.616564322 | 0.722949932 | METTL16    |
| ENSG00000139178 | 708.5321699 | 807.6649868 | -0.188865202 | 0.616592903 | 0.722949932 | C1RL       |
| ENSG00000170881 | 525.4729864 | 565.2358368 | -0.105378392 | 0.616593181 | 0.722949932 | RNF139     |
| ENSG00000241258 | 498.9383232 | 543.9172695 | -0.124865353 | 0.616598574 | 0.722949932 | CRCP       |
| ENSG00000241852 | 417.0634839 | 374.9226996 | 0.154476447  | 0.616630143 | 0.72295432  | C8orf58    |
| ENSG00000116560 | 6806.223994 | 6046.176452 | 0.170814474  | 0.61686663  | 0.72319895  | SFPQ       |
| ENSG00000177173 | 1.835020366 | 0.713078025 | 1.358799985  | 0.616894318 | 1           | NAP1L4P1   |
| ENSG00000207383 | 9.491050898 | 6.705733218 | 0.493433705  | 0.616990034 | 0.723310986 | RF00019    |
| ENSG00000235660 | 1.850135422 | 0.693008929 | 1.401051088  | 0.617005243 | 1           | LINC00345  |
| ENSG00000184895 | 1.850135422 | 0.693008929 | 1.401051088  | 0.617005243 | 1           | SRY        |
| ENSG00000186660 | 1435.211129 | 1336.699217 | 0.102644531  | 0.61705271  | 0.723332847 | ZFP91      |
| ENSG00000284630 | 1.814890715 | 3.149799701 | -0.801894668 | 0.617064363 | 0.723332847 | AP000553.5 |
| ENSG00000261706 | 0           | 0.672939833 | -2.022638168 | 0.61709324  | 1           | LINC00165  |
| ENSG00000197061 | 0           | 0.672939833 | -2.022638168 | 0.61709324  | 1           | HIST1H4C   |
| ENSG00000125285 | 0           | 0.672939833 | -2.022638168 | 0.61709324  | 1           | SOX21      |
| ENSG00000115297 | 0           | 0.672939833 | -2.022638168 | 0.61709324  | 1           | TLX2       |
| ENSG00000265261 | 0           | 0.672939833 | -2.022638168 | 0.61709324  | 1           | AC027575.1 |
| ENSG00000186790 | 0           | 0.672939833 | -2.022638168 | 0.61709324  | 1           | FOXE3      |
| ENSG00000277103 | 0           | 0.672939833 | -2.022638168 | 0.61709324  | 1           | AL445670.1 |
| ENSG00000251728 | 0           | 0.672939833 | -2.022638168 | 0.61709324  | 1           | RF00019    |
| ENSG00000251235 | 0           | 0.672939833 | -2.022638168 | 0.61709324  | 1           | SNRPCP2    |
| ENSG00000232228 | 0           | 0.672939833 | -2.022638168 | 0.61709324  | 1           | AC092431.2 |
| ENSG00000229893 | 0           | 0.672939833 | -2.022638168 | 0.61709324  | 1           | AC005091.1 |
| ENSG00000199709 | 0           | 0.672939833 | -2.022638168 | 0.61709324  | 1           | RNU4-23P   |
| ENSG00000258177 | 0           | 0.672939833 | -2.022638168 | 0.61709324  | 1           | AC008149.1 |
| ENSG00000240490 | 0           | 0.672939833 | -2.022638168 | 0.61709324  | 1           | RN7SL277P  |
| ENSG00000206820 | 0           | 0.672939833 | -2.022638168 | 0.61709324  | 1           | RNU1-138P  |
| ENSG00000272203 | 0           | 0.672939833 | -2.022638168 | 0.61709324  | 1           | AC004775.1 |
| ENSG00000200201 | 0           | 0.672939833 | -2.022638168 | 0.61709324  | 1           | RF00019    |
| novel.1021      | 0           | 0.672939833 | -2.022638168 | 0.61709324  | 1           | -          |
| ENSG00000224172 | 0           | 0.672939833 | -2.022638168 | 0.61709324  | 1           | AC091799.1 |
| ENSG00000286375 | 0           | 0.672939833 | -2.022638168 | 0.61709324  | 1           | AL512590.3 |
| ENSG00000256849 | 0           | 0.672939833 | -2.022638168 | 0.61709324  | 1           | TCP1P3     |
| ENSG00000258500 | 0           | 0.672939833 | -2.022638168 | 0.61709324  | 1           | AL845552.1 |
| ENSG00000271806 | 0           | 0.672939833 | -2.022638168 | 0.61709324  | 1           | AL590822.2 |
| ENSG00000252612 | 0           | 0.672939833 | -2.022638168 | 0.61709324  | 1           | RF00019    |
| ENSG00000223826 | 0           | 0.672939833 | -2.022638168 | 0.61709324  | 1           | LINC01870  |
| ENSG00000186451 | 0           | 0.672939833 | -2.022638168 | 0.61709324  | 1           | SPATA12    |
| ENSG00000244222 | 0           | 0.672939833 | -2.022638168 | 0.61709324  | 1           | OR7E121P   |
| ENSG00000233511 | 0           | 0.672939833 | -2.022638168 | 0.61709324  | 1           | Z98742.2   |
| ENSG00000240790 | 0           | 0.672939833 | -2.022638168 | 0.61709324  | 1           | AC073934.1 |
| ENSG00000235224 | 0           | 0.672939833 | -2.022638168 | 0.61709324  | 1           | AL591212.2 |
| ENSG00000226877 | 0           | 0.672939833 | -2.022638168 | 0.61709324  | 1           | AL354733.1 |
| ENSG00000256091 | 0           | 0.672939833 | -2.022638168 | 0.61709324  | 1           | MTRF1LP1   |
| ENSG00000252438 | 0           | 0.672939833 | -2.022638168 | 0.61709324  | 1           | RF00279    |
| ENSG00000207444 | 0           | 0.672939833 | -2.022638168 | 0.61709324  | 1           | SNORD56B   |

|                 |   |             |              |            |   |             |
|-----------------|---|-------------|--------------|------------|---|-------------|
| ENSG00000235820 | 0 | 0.672939833 | -2.022638168 | 0.61709324 | 1 | AL109935.1  |
| ENSG00000267607 | 0 | 0.672939833 | -2.022638168 | 0.61709324 | 1 | AC011511.5  |
| ENSG00000276729 | 0 | 0.672939833 | -2.022638168 | 0.61709324 | 1 | RF00017     |
| ENSG00000284716 | 0 | 0.672939833 | -2.022638168 | 0.61709324 | 1 | AL034417.3  |
| ENSG00000271989 | 0 | 0.672939833 | -2.022638168 | 0.61709324 | 1 | AL139424.1  |
| ENSG00000007968 | 0 | 0.672939833 | -2.022638168 | 0.61709324 | 1 | E2F2        |
| ENSG00000202222 | 0 | 0.672939833 | -2.022638168 | 0.61709324 | 1 | RF00019     |
| ENSG00000225711 | 0 | 0.672939833 | -2.022638168 | 0.61709324 | 1 | AL512326.1  |
| ENSG00000229821 | 0 | 0.672939833 | -2.022638168 | 0.61709324 | 1 | AC103925.1  |
| ENSG00000264802 | 0 | 0.672939833 | -2.022638168 | 0.61709324 | 1 | MIR5191     |
| ENSG00000286198 | 0 | 0.672939833 | -2.022638168 | 0.61709324 | 1 | AL606753.2  |
| ENSG00000287902 | 0 | 0.672939833 | -2.022638168 | 0.61709324 | 1 | AL023754.2  |
| ENSG00000252879 | 0 | 0.672939833 | -2.022638168 | 0.61709324 | 1 | RN7SKP98    |
| ENSG00000222407 | 0 | 0.672939833 | -2.022638168 | 0.61709324 | 1 | RNA5SP80    |
| ENSG00000237013 | 0 | 0.672939833 | -2.022638168 | 0.61709324 | 1 | LINC01812   |
| ENSG00000214513 | 0 | 0.672939833 | -2.022638168 | 0.61709324 | 1 | NOTO        |
| ENSG00000205716 | 0 | 0.672939833 | -2.022638168 | 0.61709324 | 1 | FAM183DP    |
| ENSG00000238250 | 0 | 0.672939833 | -2.022638168 | 0.61709324 | 1 | ST6GAL2-IT1 |
| ENSG00000235548 | 0 | 0.672939833 | -2.022638168 | 0.61709324 | 1 | AC073551.1  |
| ENSG00000213958 | 0 | 0.672939833 | -2.022638168 | 0.61709324 | 1 | KRT18P29    |
| ENSG00000286868 | 0 | 0.672939833 | -2.022638168 | 0.61709324 | 1 | AC074290.2  |
| ENSG00000224342 | 0 | 0.672939833 | -2.022638168 | 0.61709324 | 1 | AC007879.1  |
| ENSG00000230580 | 0 | 0.672939833 | -2.022638168 | 0.61709324 | 1 | AC021016.1  |
| ENSG00000176020 | 0 | 0.672939833 | -2.022638168 | 0.61709324 | 1 | AMIGO3      |
| ENSG00000243295 | 0 | 0.672939833 | -2.022638168 | 0.61709324 | 1 | AC126121.3  |
| ENSG00000214407 | 0 | 0.672939833 | -2.022638168 | 0.61709324 | 1 | LINC02085   |
| ENSG00000277241 | 0 | 0.672939833 | -2.022638168 | 0.61709324 | 1 | AC026355.3  |
| ENSG00000231724 | 0 | 0.672939833 | -2.022638168 | 0.61709324 | 1 | AC112907.1  |
| ENSG00000226345 | 0 | 0.672939833 | -2.022638168 | 0.61709324 | 1 | AC083822.1  |
| ENSG00000173610 | 0 | 0.672939833 | -2.022638168 | 0.61709324 | 1 | UGT2A1      |
| ENSG00000202536 | 0 | 0.672939833 | -2.022638168 | 0.61709324 | 1 | RF00019     |
| ENSG00000264792 | 0 | 0.672939833 | -2.022638168 | 0.61709324 | 1 | MIR4637     |
| ENSG00000243385 | 0 | 0.672939833 | -2.022638168 | 0.61709324 | 1 | AC094085.1  |
| ENSG00000287390 | 0 | 0.672939833 | -2.022638168 | 0.61709324 | 1 | AC006525.1  |
| ENSG00000286310 | 0 | 0.672939833 | -2.022638168 | 0.61709324 | 1 | AC008443.8  |
| ENSG00000220237 | 0 | 0.672939833 | -2.022638168 | 0.61709324 | 1 | RPS24P12    |
| ENSG00000225244 | 0 | 0.672939833 | -2.022638168 | 0.61709324 | 1 | AC069152.1  |
| ENSG00000243352 | 0 | 0.672939833 | -2.022638168 | 0.61709324 | 1 | RN7SL8P     |
| ENSG00000277721 | 0 | 0.672939833 | -2.022638168 | 0.61709324 | 1 | RF00017     |
| ENSG00000228089 | 0 | 0.672939833 | -2.022638168 | 0.61709324 | 1 | PNKDP1      |
| ENSG00000245857 | 0 | 0.672939833 | -2.022638168 | 0.61709324 | 1 | AF233439.1  |
| ENSG00000250794 | 0 | 0.672939833 | -2.022638168 | 0.61709324 | 1 | ALG1L12P    |
| ENSG00000253358 | 0 | 0.672939833 | -2.022638168 | 0.61709324 | 1 | AC087439.1  |
| ENSG00000250115 | 0 | 0.672939833 | -2.022638168 | 0.61709324 | 1 | AK3P2       |
| ENSG00000199177 | 0 | 0.672939833 | -2.022638168 | 0.61709324 | 1 | MIR31       |
| ENSG00000223795 | 0 | 0.672939833 | -2.022638168 | 0.61709324 | 1 | AL669970.1  |
| ENSG00000254592 | 0 | 0.672939833 | -2.022638168 | 0.61709324 | 1 | AC123788.1  |
| ENSG00000254865 | 0 | 0.672939833 | -2.022638168 | 0.61709324 | 1 | AC100763.1  |
| ENSG00000271350 | 0 | 0.672939833 | -2.022638168 | 0.61709324 | 1 | AC103792.1  |
| ENSG00000266215 | 0 | 0.672939833 | -2.022638168 | 0.61709324 | 1 | MIR3167     |
| ENSG00000224250 | 0 | 0.672939833 | -2.022638168 | 0.61709324 | 1 | AC025947.1  |

|                 |             |             |              |             |             |             |
|-----------------|-------------|-------------|--------------|-------------|-------------|-------------|
| ENSG00000257016 | 0           | 0.672939833 | -2.022638168 | 0.61709324  | 1           | SLC25A39P2  |
| ENSG00000255727 | 0           | 0.672939833 | -2.022638168 | 0.61709324  | 1           | LINC01489   |
| ENSG00000258179 | 0           | 0.672939833 | -2.022638168 | 0.61709324  | 1           | AC079598.3  |
| ENSG00000258357 | 0           | 0.672939833 | -2.022638168 | 0.61709324  | 1           | AC023161.2  |
| ENSG00000286520 | 0           | 0.672939833 | -2.022638168 | 0.61709324  | 1           | AC079851.1  |
| ENSG00000255853 | 0           | 0.672939833 | -2.022638168 | 0.61709324  | 1           | AC006065.1  |
| ENSG00000274670 | 0           | 0.672939833 | -2.022638168 | 0.61709324  | 1           | AC137590.2  |
| ENSG00000223617 | 0           | 0.672939833 | -2.022638168 | 0.61709324  | 1           | LINC00370   |
| ENSG00000257662 | 0           | 0.672939833 | -2.022638168 | 0.61709324  | 1           | EIF4A1P12   |
| ENSG00000201654 | 0           | 0.672939833 | -2.022638168 | 0.61709324  | 1           | RNU6-7      |
| ENSG00000259090 | 0           | 0.672939833 | -2.022638168 | 0.61709324  | 1           | SEPT7P1     |
| ENSG00000222640 | 0           | 0.672939833 | -2.022638168 | 0.61709324  | 1           | RNU2-51P    |
| ENSG00000199440 | 0           | 0.672939833 | -2.022638168 | 0.61709324  | 1           | RF00019     |
| ENSG00000252469 | 0           | 0.672939833 | -2.022638168 | 0.61709324  | 1           | RNU7-160P   |
| ENSG00000243954 | 0           | 0.672939833 | -2.022638168 | 0.61709324  | 1           | RN7SL743P   |
| ENSG00000260537 | 0           | 0.672939833 | -2.022638168 | 0.61709324  | 1           | AC012184.2  |
| ENSG00000260498 | 0           | 0.672939833 | -2.022638168 | 0.61709324  | 1           | AC126696.3  |
| ENSG00000230201 | 0           | 0.672939833 | -2.022638168 | 0.61709324  | 1           | ATP6V0CP1   |
| ENSG00000263045 | 0           | 0.672939833 | -2.022638168 | 0.61709324  | 1           | AC090286.3  |
| ENSG00000223864 | 0           | 0.672939833 | -2.022638168 | 0.61709324  | 1           | NPM1P19     |
| ENSG00000283269 | 0           | 0.672939833 | -2.022638168 | 0.61709324  | 1           | AC005524.1  |
| ENSG00000273777 | 0           | 0.672939833 | -2.022638168 | 0.61709324  | 1           | CEACAM20    |
| ENSG00000286265 | 0           | 0.672939833 | -2.022638168 | 0.61709324  | 1           | AC007244.1  |
| ENSG00000224124 | 0           | 0.672939833 | -2.022638168 | 0.61709324  | 1           | POM121L10P  |
| ENSG00000273866 | 0           | 0.672939833 | -2.022638168 | 0.61709324  | 1           | RF00017     |
| ENSG00000178457 | 0           | 0.672939833 | -2.022638168 | 0.61709324  | 1           | LINC00314   |
| novel.978       | 0           | 0.672939833 | -2.022638168 | 0.61709324  | 1           | -           |
| novel.216       | 37.71817482 | 29.94320687 | 0.331230742  | 0.617177366 | 0.723388109 | -           |
| ENSG00000230753 | 1.200686205 | 2.241891306 | -0.883533518 | 0.617209854 | 0.723388109 | ZNF341-AS1  |
| ENSG00000238793 | 1.200686205 | 2.241891306 | -0.883533518 | 0.617209854 | 0.723388109 | SNORD124    |
| ENSG00000273748 | 166.7250264 | 190.7516224 | -0.195478302 | 0.617222878 | 0.723388109 | AL592183.1  |
| ENSG00000239272 | 1.214547612 | 2.415496705 | -1.002373837 | 0.617355479 | 0.72351088  | RPL21P10    |
| novel.517       | 34.16744488 | 46.43874345 | -0.439306947 | 0.617418978 | 0.723548219 | -           |
| ENSG00000201217 | 3.61842732  | 2.221822211 | 0.718837842  | 0.617443038 | 0.723548219 | RF00019     |
| ENSG00000278916 | 8.165683297 | 5.932447905 | 0.449469273  | 0.617479925 | 0.72355881  | CEP83-DT    |
| ENSG00000206797 | 0.586481695 | 1.936102971 | -1.70732956  | 0.61752067  | 1           | RF00019     |
| ENSG00000267106 | 119.4175888 | 102.8573341 | 0.212912989  | 0.617558492 | 0.723600541 | ZNF561-AS1  |
| ENSG00000170860 | 932.0166942 | 1031.888548 | -0.147113387 | 0.617571241 | 0.723600541 | LSM3        |
| ENSG00000254887 | 16.44476515 | 23.50731493 | -0.511260462 | 0.617662418 | 0.723663389 | AC010247.1  |
| ENSG00000145743 | 419.3825261 | 378.2138817 | 0.149072203  | 0.617680587 | 0.723663389 | FBXL17      |
| ENSG00000153113 | 2731.029956 | 3022.424644 | -0.14637555  | 0.617807708 | 0.723779684 | CAST        |
| ENSG00000173535 | 44.16162305 | 34.05624196 | 0.373756957  | 0.617931135 | 0.723891642 | TNFRSF10C   |
| ENSG00000233554 | 12.50662782 | 16.40071337 | -0.398559171 | 0.618029017 | 0.72395947  | B4GALT1-AS1 |
| ENSG00000085644 | 276.4141684 | 252.641012  | 0.130810102  | 0.618044765 | 0.72395947  | ZNF213      |
| ENSG00000260880 | 1.828752122 | 0.713078025 | 1.354381189  | 0.618105512 | 1           | HCCAT5      |
| ENSG00000176971 | 270.8389858 | 198.7776311 | 0.446469139  | 0.618157488 | 0.724058866 | FIBIN       |
| ENSG00000286965 | 4.527126326 | 2.71182843  | 0.719432259  | 0.618261781 | 0.724147916 | AC108066.2  |
| ENSG00000225377 | 135.8838516 | 152.7621025 | -0.168116415 | 0.618289258 | 0.724147916 | NRSN2-AS1   |
| novel.368       | 6.379769046 | 4.442488546 | 0.53356482   | 0.618422617 | 0.724271457 | -           |
| ENSG00000176268 | 8.529484831 | 6.390488272 | 0.409531777  | 0.618525408 | 0.72435919  | CYCSP34     |
| ENSG00000104892 | 1.218308559 | 2.415496705 | -0.999018358 | 0.618593655 | 0.724406461 | KLC3        |

|                 |             |             |              |             |             |             |
|-----------------|-------------|-------------|--------------|-------------|-------------|-------------|
| ENSG00000271218 | 2.095523804 | 1.00940975  | 1.027109345  | 0.618691167 | 0.724487998 | AL033384.2  |
| ENSG00000115875 | 2303.757496 | 2503.197996 | -0.119890475 | 0.618984525 | 0.724798853 | SRSF7       |
| ENSG00000239149 | 5.67362055  | 3.953766596 | 0.525759875  | 0.619099443 | 0.724879906 | SNORA59A    |
| novel.106       | 11.67830522 | 7.591003978 | 0.632103503  | 0.619109546 | 0.724879906 | -           |
| ENSG00000232648 | 14.63245301 | 18.34267693 | -0.327452956 | 0.619299544 | 0.72506461  | AC107214.1  |
| ENSG00000283429 | 9.727663738 | 7.510855988 | 0.369986416  | 0.619323114 | 0.72506461  | MIR1244-3   |
| ENSG00000132915 | 1.539272221 | 0.693008929 | 1.127825614  | 0.619652734 | 1           | PDE6A       |
| ENSG00000286117 | 1.539272221 | 0.693008929 | 1.127825614  | 0.619652734 | 1           | AL121894.3  |
| ENSG00000100209 | 156.2572947 | 172.6951314 | -0.144540379 | 0.619684591 | 0.725455115 | HSCB        |
| ENSG00000186510 | 0.615458159 | 1.365948763 | -1.173544965 | 0.619900373 | 1           | CLCNKA      |
| ENSG00000276255 | 0.615458159 | 1.365948763 | -1.173544965 | 0.619900373 | 1           | AL136379.1  |
| ENSG00000118046 | 1809.609252 | 1942.543703 | -0.102092629 | 0.620023884 | 0.725819615 | STK11       |
| ENSG00000273176 | 2.3900183   | 1.41669944  | 0.751637927  | 0.620054784 | 0.725823084 | AL008635.1  |
| ENSG00000259322 | 4.762414247 | 2.71182843  | 0.798345963  | 0.620189843 | 0.725929765 | AC090607.1  |
| ENSG00000234432 | 11.83572403 | 8.236986644 | 0.511978287  | 0.620201801 | 0.725929765 | AC092171.3  |
| ENSG00000158748 | 2.124500267 | 1.069617038 | 0.985377941  | 0.620337754 | 0.726056185 | HTR6        |
| ENSG0000013392  | 185.9539843 | 207.6054018 | -0.157917187 | 0.6204009   | 0.726097381 | RWDD2A      |
| ENSG00000101882 | 354.9403016 | 325.1478024 | 0.126769659  | 0.620480038 | 0.726157291 | NKAP        |
| ENSG00000134202 | 698.8083806 | 810.2354672 | -0.213342536 | 0.620613969 | 0.726253899 | GSTM3       |
| ENSG00000255867 | 1.83125942  | 2.954969332 | -0.682682455 | 0.620618493 | 0.726253899 | DENND5B-AS1 |
| ENSG00000182586 | 8.184630571 | 11.55538306 | -0.490509105 | 0.620828852 | 0.726467343 | LINC00334   |
| ENSG00000202078 | 8.371994754 | 11.09747109 | -0.403460425 | 0.620884427 | 0.726499653 | RF00019     |
| ENSG00000206527 | 797.4503917 | 898.6795266 | -0.172754528 | 0.620928983 | 0.726519068 | HACD2       |
| ENSG00000197024 | 260.3830233 | 238.5490754 | 0.126361728  | 0.621001615 | 0.72657133  | ZNF398      |
| ENSG00000230417 | 4.747299191 | 2.884149558 | 0.724362515  | 0.621152806 | 0.726715498 | LINC00595   |
| ENSG00000163125 | 694.639673  | 645.448733  | 0.106026524  | 0.621329165 | 0.726889096 | RPRD2       |
| ENSG00000229447 | 9.191257072 | 6.266477676 | 0.562673098  | 0.621358177 | 0.726890306 | AC114495.2  |
| ENSG00000153246 | 344.1483967 | 462.2049098 | -0.425708896 | 0.621564712 | 0.727029754 | PLA2R1      |
| ENSG00000284490 | 1.188078446 | 2.241891306 | -0.895026116 | 0.621585033 | 0.727029754 | AC011471.4  |
| ENSG00000258583 | 1.188078446 | 2.241891306 | -0.895026116 | 0.621585033 | 0.727029754 | LINC01500   |
| ENSG00000283050 | 81.53946001 | 92.69545205 | -0.183157416 | 0.621589313 | 0.727029754 | GTF2IP12    |
| ENSG00000253284 | 4.543495031 | 2.945512721 | 0.636218541  | 0.621810218 | 0.727196949 | AC092828.1  |
| novel.6         | 3.281094953 | 5.22882649  | -0.67470296  | 0.62181558  | 0.727196949 | -           |
| ENSG00000175768 | 23.98836604 | 19.21861947 | 0.324115729  | 0.621816228 | 0.727196949 | TOMM5       |
| ENSG00000267582 | 2.082916045 | 3.515795324 | -0.754966722 | 0.621936997 | 0.727279648 | AC020916.2  |
| ENSG00000235734 | 7.963132787 | 10.6701123  | -0.428100097 | 0.621972483 | 0.727279648 | HMGN1P36    |
| ENSG00000267560 | 3.972128392 | 2.139234076 | 0.888770039  | 0.621978613 | 0.727279648 | AC027514.2  |
| ENSG00000235268 | 3.391914941 | 1.447381022 | 1.229189231  | 0.62203421  | 0.727279648 | KDM4E       |
| ENSG00000264546 | 2.666890443 | 1.161661783 | 1.22318125   | 0.622054899 | 0.727279648 | AC008026.3  |
| ENSG00000277892 | 2.666890443 | 1.161661783 | 1.22318125   | 0.622054899 | 0.727279648 | MIR6746     |
| ENSG00000171970 | 8.102715775 | 5.879257082 | 0.473809963  | 0.622113867 | 0.727315861 | ZNF57       |
| ENSG00000261208 | 1.232169966 | 2.455634897 | -1.006139902 | 0.622289977 | 0.727476964 | AL365475.1  |
| ENSG00000164972 | 4.796405305 | 3.189937893 | 0.585628863  | 0.622307668 | 0.727476964 | C9orf24     |
| ENSG00000217078 | 1.495180701 | 0.672939833 | 1.120074228  | 0.622360586 | 1           | AL021407.1  |
| ENSG00000253773 | 2.431602522 | 1.365948763 | 0.804151677  | 0.622454408 | 0.727578055 | C8orf37-AS1 |
| ENSG00000287625 | 24.68985595 | 20.23046937 | 0.282356281  | 0.622475834 | 0.727578055 | AC022210.2  |
| ENSG00000005249 | 41.21145003 | 34.50713747 | 0.255166074  | 0.622478157 | 0.727578055 | PRKAR2B     |
| ENSG00000270711 | 2.081662396 | 1.130980201 | 0.910242434  | 0.622521115 | 0.727595533 | AL162431.4  |
| ENSG00000213015 | 489.3538605 | 529.8580694 | -0.115306663 | 0.622958163 | 0.728056265 | ZNF580      |
| ENSG00000206159 | 1.541779519 | 3.424906455 | -1.160780862 | 0.622971357 | 0.728056265 | GYG2P1      |
| ENSG00000129933 | 1223.821239 | 1128.790818 | 0.116755709  | 0.623019832 | 0.728080166 | MAU2        |

|                 |             |             |              |             |             |            |
|-----------------|-------------|-------------|--------------|-------------|-------------|------------|
| ENSG00000272519 | 0.879722543 | 2.099095884 | -1.24964651  | 0.623079468 | 0.728117107 | AC079610.3 |
| ENSG00000080031 | 71.98579724 | 91.00514006 | -0.336234186 | 0.623175181 | 0.728196203 | AC010327.1 |
| ENSG00000112773 | 678.9046027 | 606.8532184 | 0.161429854  | 0.623501803 | 0.728545102 | TENT5A     |
| ENSG00000233276 | 8113.032273 | 8720.577307 | -0.104168921 | 0.623559345 | 0.72856473  | GPX1       |
| ENSG00000079112 | 3.615920022 | 1.90542139  | 0.942407291  | 0.62363035  | 0.72856473  | CDH17      |
| ENSG00000241493 | 0.894837599 | 1.874739808 | -1.049130461 | 0.623658812 | 0.72856473  | AC018638.3 |
| ENSG00000281383 | 0.894837599 | 1.874739808 | -1.049130461 | 0.623658812 | 0.72856473  | FP671120.5 |
| ENSG00000161103 | 0.894837599 | 1.874739808 | -1.049130461 | 0.623658812 | 0.72856473  | AC008132.1 |
| ENSG00000176153 | 3.079798091 | 5.524002339 | -0.851438631 | 0.623756242 | 0.728645786 | GPX2       |
| ENSG00000283503 | 2.763920295 | 5.054065216 | -0.872831094 | 0.62390962  | 0.728792187 | LINC01902  |
| ENSG00000258623 | 2.403879708 | 3.709341424 | -0.609113955 | 0.623974967 | 0.728835751 | AL121820.1 |
| ENSG00000103253 | 338.5213652 | 373.0346975 | -0.139203726 | 0.624066615 | 0.728842976 | HAGHL      |
| ENSG00000063241 | 973.9987708 | 1066.055958 | -0.130389985 | 0.624102665 | 0.728842976 | ISOC2      |
| ENSG00000133250 | 291.4335307 | 265.3257999 | 0.135388418  | 0.624103733 | 0.728842976 | ZNF414     |
| ENSG00000235979 | 1.203193503 | 2.140389951 | -0.829897641 | 0.624105963 | 0.728842976 | AC004448.2 |
| ENSG00000099940 | 595.4392627 | 634.8263021 | -0.092604979 | 0.624121417 | 0.728842976 | SNAP29     |
| ENSG00000139718 | 514.8567254 | 562.75991   | -0.12814534  | 0.624236356 | 0.728944436 | SETD1B     |
| novel.285       | 3.962027931 | 2.547679642 | 0.641665514  | 0.624337237 | 0.729029472 | -          |
| ENSG00000157833 | 145.7555713 | 133.2414191 | 0.128920669  | 0.624451624 | 0.729130271 | GAREM2     |
| ENSG00000245556 | 191.2879787 | 169.5021583 | 0.173024533  | 0.624586751 | 0.729240333 | SCAMP1-AS1 |
| ENSG00000261441 | 9.102105118 | 6.399816488 | 0.521665023  | 0.624602022 | 0.729240333 | AC124068.2 |
| ENSG00000179580 | 2.744973021 | 1.386017859 | 0.97124409   | 0.624673788 | 0.729291349 | RNF151     |
| ENSG00000112282 | 691.7363998 | 635.4124967 | 0.122445534  | 0.624749868 | 0.729347397 | MED23      |
| ENSG00000248690 | 20.15896867 | 14.93771118 | 0.438436065  | 0.624795604 | 0.729368017 | HAS2-AS1   |
| ENSG00000232028 | 1.521649867 | 2.975038428 | -0.961955843 | 0.624921912 | 0.729482688 | AC007391.1 |
| ENSG00000222808 | 5.661012792 | 8.593525656 | -0.606142282 | 0.6250803   | 0.729634795 | RNU4-47P   |
| ENSG00000230683 | 1.200686205 | 2.129777466 | -0.827011065 | 0.625188248 | 0.729728014 | DDTP1      |
| ENSG00000280007 | 12.5529419  | 9.376139186 | 0.425028222  | 0.625272162 | 0.729793173 | AC008079.1 |
| ENSG00000185404 | 382.9677821 | 412.8819231 | -0.108417612 | 0.625636439 | 0.730155723 | SP140L     |
| ENSG00000264049 | 3.968367446 | 2.415496705 | 0.697974212  | 0.625692347 | 0.730155723 | MIR4737    |
| ENSG00000250312 | 128.8979697 | 140.0049194 | -0.119025963 | 0.625692962 | 0.730155723 | ZNF718     |
| ENSG00000276509 | 1.233423615 | 2.812173909 | -1.196329413 | 0.625695201 | 0.730155723 | AC239799.1 |
| ENSG00000183889 | 30.79379304 | 25.52639122 | 0.275304387  | 0.62575036  | 0.730187294 | AC138969.1 |
| ENSG00000105701 | 5713.637824 | 6267.534051 | -0.133430928 | 0.625827394 | 0.730244387 | FKBP8      |
| ENSG00000167065 | 68.67565491 | 60.32297234 | 0.18674071   | 0.625864533 | 0.730254925 | DUSP18     |
| novel.907       | 15.97057091 | 30.02027274 | -0.909532623 | 0.626074206 | 0.730466766 | -          |
| ENSG00000261754 | 1.847628125 | 0.774441189 | 1.280274174  | 0.626240631 | 1           | AC008555.1 |
| ENSG00000183032 | 7.608178066 | 9.722065713 | -0.354597092 | 0.62632226  | 0.730680724 | SLC25A21   |
| ENSG00000113312 | 982.5953282 | 895.7335006 | 0.133145592  | 0.626339423 | 0.730680724 | TTC1       |
| ENSG00000239763 | 7.562832897 | 9.600495262 | -0.347932777 | 0.626341958 | 0.730680724 | AC009120.1 |
| ENSG00000202347 | 1.511549406 | 0.693008929 | 1.106273329  | 0.626422867 | 1           | RNU1-16P   |
| ENSG00000073712 | 3156.003131 | 3735.882046 | -0.243409377 | 0.626469273 | 0.730796434 | FERMT2     |
| ENSG00000087884 | 191.9552359 | 208.8574857 | -0.121515761 | 0.626500746 | 0.730800335 | AAMDC      |
| ENSG00000215493 | 9.891137324 | 13.10452223 | -0.406654468 | 0.626532044 | 0.730804033 | AC007731.1 |
| novel.704       | 7.356592712 | 4.250098321 | 0.787915286  | 0.626563193 | 0.730807557 | -          |
| ENSG00000151693 | 499.5676302 | 562.6515078 | -0.171119345 | 0.626648256 | 0.730860128 | ASAP2      |
| ENSG00000242578 | 1.510295757 | 0.713078025 | 1.078640651  | 0.626659663 | 1           | AC073288.2 |
| ENSG00000092148 | 1920.154626 | 2052.198719 | -0.09594264  | 0.626664527 | 0.730860128 | HECTD1     |
| ENSG00000228124 | 2.376156893 | 1.00940975  | 1.217116965  | 0.626764791 | 0.730917236 | AL096678.1 |
| ENSG00000280424 | 5.128723077 | 6.817847059 | -0.409049424 | 0.626769759 | 0.730917236 | BX537318.2 |
| ENSG00000136897 | 368.1337319 | 401.1139523 | -0.124194314 | 0.627045057 | 0.731205459 | MRPL50     |

|                 |             |             |              |             |             |            |
|-----------------|-------------|-------------|--------------|-------------|-------------|------------|
| ENSG00000230393 | 2.460578986 | 1.069617038 | 1.197036682  | 0.627158539 | 0.731304968 | AC092667.1 |
| ENSG00000163719 | 768.9723102 | 709.3394076 | 0.116872358  | 0.62718746  | 0.73130587  | MTMR14     |
| ENSG00000275695 | 1.50778846  | 0.693008929 | 1.103361501  | 0.62734134  | 1           | UBE2Q2P6   |
| ENSG00000141505 | 18.27978552 | 22.20786641 | -0.283082452 | 0.62738995  | 0.731497566 | ASGR1      |
| ENSG00000173120 | 1895.684943 | 2035.880886 | -0.102796848 | 0.627408173 | 0.731497566 | KDM2A      |
| ENSG00000184203 | 737.2670384 | 794.5805333 | -0.108008437 | 0.627469082 | 0.731511598 | PPP1R2     |
| ENSG00000165837 | 6.654133891 | 5.013927024 | 0.407474597  | 0.62747652  | 0.731511598 | ERICH6B    |
| ENSG00000117174 | 577.4734457 | 641.2503101 | -0.15161498  | 0.627710046 | 0.731751008 | ZNHIT6     |
| ENSG00000146350 | 94.16811973 | 107.7482308 | -0.194376129 | 0.62780519  | 0.731822108 | TBC1D32    |
| ENSG00000120656 | 415.5232984 | 461.262129  | -0.15132117  | 0.627846623 | 0.731822108 | TAF12      |
| ENSG00000178732 | 4.295599352 | 2.618499415 | 0.725721261  | 0.62785554  | 0.731822108 | GP5        |
| ENSG00000233937 | 33.32360779 | 38.47968889 | -0.204099226 | 0.627921898 | 0.731866621 | AC008443.1 |
| ENSG00000196391 | 27.69909335 | 32.43769569 | -0.231419892 | 0.628119848 | 0.732064497 | ZNF774     |
| ENSG00000170468 | 305.8408675 | 281.0139016 | 0.121531736  | 0.628168718 | 0.732088613 | RIOX1      |
| ENSG00000275374 | 0.879722543 | 1.823989131 | -1.034059632 | 0.628530961 | 0.732412222 | AC113385.3 |
| ENSG00000235698 | 0.879722543 | 1.823989131 | -1.034059632 | 0.628530961 | 0.732412222 | PA2G4P2    |
| ENSG00000234271 | 0.879722543 | 1.823989131 | -1.034059632 | 0.628530961 | 0.732412222 | Z98752.2   |
| ENSG00000286001 | 9.562580498 | 6.594775252 | 0.529340494  | 0.62857006  | 0.732424933 | AC021087.5 |
| ENSG00000222489 | 4.398612713 | 7.807187713 | -0.824358395 | 0.62862403  | 0.73245497  | SNORA79B   |
| ENSG00000124164 | 1247.007492 | 1160.87605  | 0.103041098  | 0.628918876 | 0.732765655 | VAPB       |
| ENSG00000203364 | 0.586481695 | 1.518200796 | -1.34948824  | 0.629134868 | 1           | AL390760.1 |
| ENSG00000188801 | 3.357923882 | 2.191140629 | 0.622720974  | 0.62914233  | 0.732993133 | ZNF322P1   |
| ENSG00000157999 | 16.4167576  | 21.0626777  | -0.354438637 | 0.62920638  | 0.733034885 | ANKRD61    |
| ENSG00000251050 | 5.496285557 | 3.9336975   | 0.477557502  | 0.629235463 | 0.733035897 | AC112184.1 |
| ENSG00000035681 | 828.0304226 | 774.2659004 | 0.096719066  | 0.629402343 | 0.73319743  | NSMAF      |
| ENSG00000207370 | 0.586481695 | 1.487519214 | -1.323332037 | 0.629484885 | 1           | RF00019    |
| ENSG00000173295 | 0.909952655 | 1.874739808 | -1.031913549 | 0.62950286  | 0.733207656 | FAM86B3P   |
| ENSG00000100106 | 2563.446539 | 2772.128318 | -0.112958985 | 0.629511206 | 0.733207656 | TRIOBP     |
| ENSG00000162032 | 5.458462281 | 7.866239125 | -0.52874888  | 0.629523413 | 0.733207656 | SPSB3      |
| ENSG00000234772 | 1.833766717 | 2.934900236 | -0.674234398 | 0.629556204 | 0.733207656 | LINC00412  |
| ENSG00000133935 | 568.0300758 | 617.732627  | -0.121216966 | 0.629596579 | 0.733207656 | ERG28      |
| ENSG00000005059 | 299.6821523 | 356.3717326 | -0.250582036 | 0.629601781 | 0.733207656 | MCUB       |
| ENSG00000144566 | 1364.550599 | 1268.33828  | 0.105703049  | 0.629608668 | 0.733207656 | RAB5A      |
| ENSG00000150873 | 1.54052587  | 0.693008929 | 1.130107276  | 0.629782693 | 1           | C2orf50    |
| ENSG00000067533 | 369.1066955 | 426.9477666 | -0.210623801 | 0.629804549 | 0.733341764 | RRP15      |
| ENSG00000280441 | 1.232169966 | 2.211209725 | -0.842452431 | 0.62981068  | 0.733341764 | FP236383.1 |
| ENSG00000279384 | 3.579350395 | 2.160459047 | 0.733187084  | 0.629832533 | 0.733341764 | AC080188.2 |
| ENSG00000176531 | 191.5750222 | 167.3557665 | 0.196141018  | 0.629862496 | 0.733341764 | PHLDB3     |
| ENSG00000184371 | 2181.237839 | 2015.230686 | 0.114068808  | 0.629864958 | 0.733341764 | CSF1       |
| ENSG00000206913 | 2.722336072 | 4.361056287 | -0.676425124 | 0.629903401 | 0.733353659 | RF00409    |
| ENSG00000260916 | 494.5941431 | 439.1388585 | 0.171066465  | 0.629980514 | 0.733410572 | CCPG1      |
| ENSG00000197956 | 17484.19288 | 19376.11768 | -0.148210297 | 0.630110053 | 0.73352851  | S100A6     |
| ENSG00000270706 | 1.49643435  | 0.693008929 | 1.094448992  | 0.6301528   | 1           | PRMT1P1    |
| ENSG00000168434 | 382.651833  | 414.0053732 | -0.113265925 | 0.630215774 | 0.733618712 | COG7       |
| ENSG00000287763 | 7.783005762 | 10.84230503 | -0.466659491 | 0.630268322 | 0.733647011 | AC068279.2 |
| ENSG00000279789 | 46.44129208 | 38.89900373 | 0.25600342   | 0.630485685 | 0.733867147 | AC120114.3 |
| ENSG00000245614 | 6.459176544 | 9.794169756 | -0.606988805 | 0.63054325  | 0.733897306 | DDX11-AS1  |
| ENSG00000246851 | 3.882691704 | 2.42610919  | 0.667073684  | 0.63056809  | 0.733897306 | AL157938.3 |
| ENSG00000188807 | 417.0288087 | 373.2476829 | 0.159353099  | 0.630686083 | 0.734001752 | TMEM201    |
| ENSG00000275110 | 1.493927053 | 0.693008929 | 1.092498696  | 0.630769688 | 1           | AL928646.1 |
| ENSG00000136044 | 834.2314048 | 895.9330576 | -0.102694928 | 0.631096796 | 0.734446847 | APPL2      |

|                 |             |             |              |             |             |             |
|-----------------|-------------|-------------|--------------|-------------|-------------|-------------|
| ENSG00000270062 | 8.202181653 | 5.575908892 | 0.547924302  | 0.631127977 | 0.734450236 | AL606834.2  |
| ENSG00000107018 | 1.525410814 | 0.713078025 | 1.090548244  | 0.631142171 | 1           | RLN1        |
| ENSG00000206417 | 71.26120002 | 80.49567457 | -0.178389158 | 0.63144004  | 0.734729769 | H1FX-AS1    |
| ENSG00000153165 | 7.588048415 | 5.717548439 | 0.405416071  | 0.63144375  | 0.734729769 | RGPD3       |
| ENSG00000232842 | 0.908699006 | 0.387220594 | 1.233659358  | 0.63145976  | 1           | AL137845.2  |
| ENSG00000285923 | 3.959520633 | 2.456790772 | 0.67831095   | 0.631475551 | 0.734729769 | AL160171.1  |
| ENSG00000197980 | 16.98715533 | 13.66509143 | 0.323189823  | 0.631481303 | 0.734729769 | LEKR1       |
| ENSG00000286613 | 6.943613792 | 9.029056784 | -0.375166219 | 0.631559028 | 0.734787296 | AC006213.7  |
| ENSG00000142700 | 1.81990531  | 0.774441189 | 1.260763903  | 0.631737578 | 1           | DMRTA2      |
| ENSG00000237520 | 1.81990531  | 0.774441189 | 1.260763903  | 0.631737578 | 1           | AL391832.1  |
| ENSG00000236799 | 1.522903516 | 0.713078025 | 1.088615734  | 0.631753089 | 1           | LINC02626   |
| ENSG00000159069 | 2119.101766 | 2259.309275 | -0.092415769 | 0.631831803 | 0.735071739 | FBXW5       |
| ENSG00000076641 | 836.4681321 | 680.8321604 | 0.297260007  | 0.631976032 | 0.735206613 | PAG1        |
| ENSG00000237510 | 8.624905028 | 4.750717026 | 0.853637938  | 0.632100209 | 0.735318148 | GPAT2P1     |
| ENSG00000116678 | 777.3282871 | 639.9536862 | 0.28023813   | 0.632272471 | 0.735485608 | LEPR        |
| ENSG00000142910 | 380.1468333 | 523.1202798 | -0.460807465 | 0.632430713 | 0.735636745 | TINAGL1     |
| ENSG00000144504 | 223.539101  | 201.40149   | 0.149698267  | 0.63274029  | 0.735937174 | ANKMY1      |
| ENSG00000236044 | 0.894837599 | 1.885352294 | -1.056757604 | 0.632745645 | 0.735937174 | FABP5P2     |
| ENSG00000232750 | 2.44546393  | 1.386017859 | 0.798148189  | 0.632807424 | 0.735976082 | AL139132.1  |
| ENSG00000214708 | 3.020591515 | 4.300848999 | -0.509133155 | 0.63311195  | 0.736276896 | AC116407.1  |
| ENSG00000272721 | 4.485542104 | 6.318512624 | -0.497172225 | 0.633122749 | 0.736276896 | AC131235.2  |
| ENSG00000227289 | 1.526664462 | 0.693008929 | 1.119204827  | 0.633146646 | 1           | HSFY3P      |
| ENSG00000259422 | 0.908699006 | 0.356539013 | 1.233661266  | 0.633209215 | 1           | AC091100.1  |
| ENSG00000260693 | 0.908699006 | 0.356539013 | 1.233661266  | 0.633209215 | 1           | AC026150.1  |
| ENSG00000225014 | 0.908699006 | 0.356539013 | 1.233661266  | 0.633209215 | 1           | KCTD9P1     |
| ENSG00000220586 | 0.908699006 | 0.356539013 | 1.233661266  | 0.633209215 | 1           | TUBBP9      |
| novel.700       | 23.75483032 | 17.79130755 | 0.418198056  | 0.633214502 | 0.736302647 | -           |
| ENSG00000186470 | 754.8855199 | 879.7193621 | -0.220647983 | 0.633217395 | 0.736302647 | BTN3A2      |
| ENSG00000111319 | 20.07948991 | 28.07334735 | -0.487463576 | 0.633229912 | 0.736302647 | SCNN1A      |
| ENSG00000215784 | 28.83896333 | 36.30314195 | -0.334553788 | 0.63346026  | 0.736537526 | FAM72D      |
| ENSG00000258759 | 1.759445085 | 3.781445468 | -1.102733787 | 0.633704543 | 0.736788585 | AL049779.2  |
| ENSG00000070669 | 23.00946235 | 18.61906795 | 0.29914482   | 0.633822967 | 0.736876582 | ASNS        |
| ENSG00000262248 | 4.513264919 | 6.094156548 | -0.430835844 | 0.633836952 | 0.736876582 | AC027796.2  |
| ENSG00000229619 | 69.49624214 | 49.3854589  | 0.491089278  | 0.633929862 | 0.73695162  | MBNL1-AS1   |
| ENSG00000228536 | 4.294345703 | 6.297159258 | -0.547949095 | 0.634056046 | 0.73706533  | LYPLAL1-AS1 |
| ENSG00000279880 | 6.536974388 | 4.269011542 | 0.614941794  | 0.634197964 | 0.73719732  | AC134407.3  |
| ENSG00000180747 | 7.678810023 | 4.350443801 | 0.819983772  | 0.634344341 | 0.737334481 | SMG1P3      |
| ENSG00000138315 | 0.908699006 | 0.336469917 | 1.23366253   | 0.634377173 | 1           | OIT3        |
| ENSG00000069696 | 0.908699006 | 0.336469917 | 1.23366253   | 0.634377173 | 1           | DRD4        |
| ENSG00000261211 | 0.908699006 | 0.336469917 | 1.23366253   | 0.634377173 | 1           | AL031123.2  |
| ENSG00000124782 | 496.7933087 | 538.6738365 | -0.116191646 | 0.634512674 | 0.73749715  | RREB1       |
| ENSG00000279936 | 1.759445085 | 0.693008929 | 1.335658299  | 0.634567862 | 1           | AC008806.1  |
| ENSG00000073605 | 254.6357371 | 293.522537  | -0.204081801 | 0.634584684 | 0.737547852 | GSDMB       |
| ENSG00000266962 | 2.684512796 | 4.64561965  | -0.788814048 | 0.63473241  | 0.737686546 | AC067852.2  |
| ENSG00000288109 | 0.923814062 | 1.874739808 | -1.016155567 | 0.634872435 | 0.737816279 | AC079331.3  |
| ENSG00000241127 | 220.8648312 | 204.1883294 | 0.11354702   | 0.63491572  | 0.737833579 | YAE1        |
| ENSG00000286799 | 2.40137241  | 1.069617038 | 1.165058664  | 0.635010115 | 0.737891486 | AC124066.1  |
| ENSG00000228634 | 1.49643435  | 2.772035718 | -0.89404694  | 0.635022352 | 0.737891486 | AL136115.1  |
| ENSG00000256124 | 6.656641189 | 8.877960626 | -0.418371542 | 0.635210462 | 0.738077058 | LINC01152   |
| ENSG00000070501 | 288.8887709 | 314.8445504 | -0.12496882  | 0.635309375 | 0.738158976 | POLB        |
| ENSG00000162783 | 1295.339072 | 1089.738804 | 0.249268875  | 0.635354857 | 0.73817881  | IER5        |

|                 |             |             |              |             |             |               |
|-----------------|-------------|-------------|--------------|-------------|-------------|---------------|
| ENSG00000228157 | 2.140868972 | 3.260757667 | -0.608167533 | 0.635392371 | 0.738189384 | AC007952.2    |
| ENSG00000225883 | 0.308355904 | 1.161661783 | -1.825522462 | 0.635529189 | 1           | BMS1P11       |
| ENSG00000231754 | 0.308355904 | 1.161661783 | -1.825522462 | 0.635529189 | 1           | AL512380.1    |
| ENSG00000219188 | 0.308355904 | 1.161661783 | -1.825522462 | 0.635529189 | 1           | CACYBPP3      |
| ENSG00000286355 | 0.308355904 | 1.161661783 | -1.825522462 | 0.635529189 | 1           | AL355834.2    |
| ENSG00000271843 | 10.30404497 | 8.183795821 | 0.327520326  | 0.635586587 | 0.738361897 | AC012557.1    |
| ENSG00000155011 | 30.92474268 | 24.17850377 | 0.348614915  | 0.6355977   | 0.738361897 | DKK2          |
| ENSG00000213194 | 0.307102255 | 1.161661783 | -1.825527893 | 0.635614896 | 1           | CDK7P1        |
| ENSG00000273003 | 0.307102255 | 1.161661783 | -1.825527893 | 0.635614896 | 1           | ARL2-SNX15    |
| ENSG00000279459 | 0.307102255 | 1.161661783 | -1.825527893 | 0.635614896 | 1           | AP001271.2    |
| ENSG00000229256 | 0.307102255 | 1.161661783 | -1.825527893 | 0.635614896 | 1           | ST13P13       |
| ENSG00000172936 | 854.4936105 | 958.0053246 | -0.165226931 | 0.635661275 | 0.738402735 | MYD88         |
| ENSG00000038219 | 1158.378241 | 1261.203247 | -0.122546352 | 0.635734888 | 0.738454983 | BOD1L1        |
| ENSG00000007341 | 229.5245106 | 209.2406436 | 0.132115557  | 0.635763098 | 0.738454983 | ST7L          |
| ENSG00000260447 | 1.466204238 | 2.842855491 | -0.948048649 | 0.635949071 | 0.738637973 | AC009065.3    |
| ENSG00000164185 | 3.023098812 | 4.748276881 | -0.646647182 | 0.636103252 | 0.738764793 | ZNF474        |
| ENSG00000228997 | 2.46684723  | 1.029478846 | 1.245751427  | 0.63611513  | 0.738764793 | AL136452.1    |
| ENSG00000271851 | 17.07540964 | 21.19730078 | -0.313388405 | 0.636292281 | 0.7389375   | AC087501.4    |
| ENSG00000240616 | 5.138823539 | 7.349147345 | -0.52183386  | 0.636323318 | 0.738940514 | RPS6P25       |
| ENSG00000272622 | 19.44397337 | 16.06997565 | 0.280452922  | 0.636416582 | 0.739009982 | AC010735.2    |
| ENSG00000225345 | 2.052685933 | 0.672939833 | 1.594561906  | 0.636470192 | 0.739009982 | SNX18P3       |
| ENSG00000207362 | 2.052685933 | 0.672939833 | 1.594561906  | 0.636470192 | 0.739009982 | RNU6-422P     |
| ENSG00000276188 | 2.403879708 | 1.396630344 | 0.771737961  | 0.636496916 | 0.739009982 | AC069234.4    |
| ENSG00000229917 | 0.293240848 | 1.161661783 | -1.825588078 | 0.636566974 | 1           | RPL7P46       |
| ENSG00000257271 | 0.293240848 | 1.161661783 | -1.825588078 | 0.636566974 | 1           | KIRREL3-AS1   |
| ENSG00000231707 | 0.293240848 | 1.161661783 | -1.825588078 | 0.636566974 | 1           | PABPC1P1      |
| ENSG00000267501 | 0.293240848 | 1.161661783 | -1.825588078 | 0.636566974 | 1           | AC104365.2    |
| ENSG00000226883 | 0.293240848 | 1.161661783 | -1.825588078 | 0.636566974 | 1           | AL035416.1    |
| ENSG00000251467 | 0.293240848 | 1.161661783 | -1.825588078 | 0.636566974 | 1           | AC020893.2    |
| ENSG00000182450 | 0.293240848 | 1.161661783 | -1.825588078 | 0.636566974 | 1           | KCNK4         |
| ENSG00000262884 | 0.293240848 | 1.161661783 | -1.825588078 | 0.636566974 | 1           | AC015921.1    |
| ENSG00000232754 | 0.293240848 | 1.161661783 | -1.825588078 | 0.636566974 | 1           | AL035658.1    |
| ENSG00000184304 | 661.0298677 | 546.8020735 | 0.273528251  | 0.636611164 | 0.739109601 | PRKD1         |
| ENSG00000260441 | 2.654282684 | 1.161661783 | 1.215239393  | 0.636743413 | 0.739208723 | AC020978.2    |
| ENSG00000256742 | 5.769396753 | 7.919301553 | -0.456800993 | 0.636753444 | 0.739208723 | AC145422.1    |
| ENSG00000185024 | 741.9515716 | 689.5447389 | 0.105757288  | 0.636864862 | 0.739305034 | BRF1          |
| ENSG00000261560 | 5.658505494 | 3.842808631 | 0.551986658  | 0.637005829 | 0.739435638 | AC007216.3    |
| ENSG00000235183 | 2.666890443 | 1.386017859 | 0.934903807  | 0.637221917 | 0.739653426 | SRP14P3       |
| ENSG00000278267 | 11.82945579 | 9.477640541 | 0.326381467  | 0.637273294 | 0.739680015 | MIR6859-1     |
| ENSG00000182362 | 239.4986459 | 265.2275434 | -0.146478236 | 0.637574465 | 0.739996523 | YBEY          |
| ENSG00000164845 | 18.99574974 | 15.16347992 | 0.320451662  | 0.63771743  | 0.740129391 | FAM86FP       |
| ENSG00000260280 | 1.214547612 | 2.140389951 | -0.820709846 | 0.637768264 | 0.740155326 | SLX1B-SULT1A4 |
| ENSG00000180316 | 1.789675198 | 0.774441189 | 1.239256671  | 0.637816445 | 1           | PNPLA1        |
| ENSG00000224292 | 3.078544442 | 1.823989131 | 0.757933135  | 0.638056934 | 0.740452625 | AF196972.1    |
| ENSG00000210196 | 470.2905013 | 535.9490026 | -0.18823329  | 0.638081437 | 0.740452625 | MT-TP         |
| ENSG00000151012 | 330.8458986 | 249.4984852 | 0.406945191  | 0.638222095 | 0.74055193  | SLC7A11       |
| ENSG00000164675 | 3.047060681 | 4.340987191 | -0.510380724 | 0.63822402  | 0.74055193  | IQUB          |
| ENSG00000101752 | 1062.778365 | 1160.973707 | -0.12731093  | 0.638402901 | 0.74072641  | MIB1          |
| ENSG00000213406 | 1.480065645 | 2.547679642 | -0.769024135 | 0.638518632 | 0.740819531 | ANXA2P1       |
| ENSG00000169733 | 910.7212486 | 974.6165117 | -0.097578425 | 0.638540186 | 0.740819531 | RFNG          |
| ENSG00000228216 | 1.495180701 | 0.713078025 | 1.066944302  | 0.638615971 | 1           | AL355607.1    |



|                 |             |             |              |             |             |            |
|-----------------|-------------|-------------|--------------|-------------|-------------|------------|
| ENSG00000169255 | 257.3785714 | 209.7184619 | 0.294567218  | 0.638658413 | 0.740923609 | B3GALNT1   |
| ENSG00000164615 | 810.0053267 | 878.1833824 | -0.116459554 | 0.638781281 | 0.740979469 | CAMLG      |
| ENSG00000272506 | 2.387511003 | 1.069617038 | 1.157498795  | 0.638792123 | 0.740979469 | AL357078.3 |
| ENSG00000225224 | 2.387511003 | 1.069617038 | 1.157498795  | 0.638792123 | 0.740979469 | RPS27AP12  |
| ENSG00000253302 | 2.096777453 | 1.069617038 | 0.969611854  | 0.63888861  | 0.741058305 | STAU2-AS1  |
| ENSG00000142102 | 1058.767075 | 1152.129314 | -0.121655273 | 0.639002812 | 0.741157681 | PGGHG      |
| ENSG00000280162 | 0.586481695 | 1.447381022 | -1.289114567 | 0.639022811 | 1           | AL136531.3 |
| ENSG00000012223 | 4.285498891 | 7.234464965 | -0.750206224 | 0.639090666 | 0.74122649  | LTF        |
| ENSG00000184986 | 239.4117291 | 202.0528541 | 0.245224785  | 0.639128275 | 0.741237019 | TMEM121    |
| ENSG00000232479 | 1.50778846  | 0.723690511 | 1.064832003  | 0.639154494 | 1           | AC010900.1 |
| ENSG00000259677 | 2.66939774  | 1.365948763 | 0.952358563  | 0.639170238 | 0.741252598 | AC027176.2 |
| ENSG00000231528 | 15.93009779 | 11.34549228 | 0.480671181  | 0.639207442 | 0.741262656 | FAM225A    |
| ENSG00000172456 | 153.8783458 | 137.7314946 | 0.15860685   | 0.639252383 | 0.741281685 | FGGY       |
| ENSG00000261173 | 2.403879708 | 3.52640781  | -0.556902148 | 0.639373589 | 0.741372981 | AC018845.3 |
| ENSG00000234851 | 129.5312637 | 117.6494245 | 0.138418617  | 0.639388184 | 0.741372981 | RPL23AP42  |
| ENSG00000276988 | 0.879722543 | 1.773238453 | -1.0012998   | 0.639475209 | 1           | RF00017    |
| ENSG00000122787 | 0.925067711 | 2.099095884 | -1.191955285 | 0.639508521 | 0.741479422 | AKR1D1     |
| ENSG00000280789 | 244.6512596 | 220.9913237 | 0.147388003  | 0.639551503 | 0.741496166 | PAGR1      |
| ENSG00000242651 | 1.774560141 | 3.362259022 | -0.908896815 | 0.639656067 | 0.741584305 | RN7SL862P  |
| ENSG00000253754 | 1.17296339  | 2.618499415 | -1.14480325  | 0.639738024 | 0.741646228 | AC087620.1 |
| ENSG00000278022 | 1.493927053 | 2.751966622 | -0.88699893  | 0.639783216 | 0.741665525 | AC118658.1 |
| ENSG00000047621 | 384.4250251 | 432.619783  | -0.171038498 | 0.63992105  | 0.74179221  | C12orf4    |
| ENSG00000116525 | 450.3149756 | 393.7004534 | 0.193217225  | 0.640073417 | 0.74193573  | TRIM62     |
| ENSG00000081051 | 1.541779519 | 2.92428775  | -0.925258659 | 0.640182163 | 0.742005751 | AFP        |
| ENSG00000273064 | 4.55610279  | 3.159256312 | 0.515287602  | 0.640190944 | 0.742005751 | AC017083.1 |
| ENSG00000108506 | 335.696443  | 314.5830442 | 0.093916803  | 0.640472387 | 0.742298839 | INTS2      |
| ENSG00000119471 | 779.7825874 | 729.741697  | 0.095379322  | 0.640925984 | 0.742791417 | HSDL2      |
| ENSG00000072803 | 1187.419895 | 1280.223724 | -0.108575508 | 0.641234201 | 0.743115472 | FBXW11     |
| ENSG00000233155 | 2.442956632 | 4.035198856 | -0.721521858 | 0.641314672 | 0.743168636 | HMGA1P8    |
| ENSG00000242028 | 37.78741059 | 46.94419527 | -0.308934328 | 0.641337284 | 0.743168636 | HYPK       |
| ENSG00000255568 | 8.474039201 | 6.338453325 | 0.43353646   | 0.641369979 | 0.743173375 | BRWD1-AS2  |
| ENSG00000115839 | 1163.642585 | 1234.13434  | -0.08503846  | 0.64142308  | 0.743177456 | RAB3GAP1   |
| ENSG00000279390 | 1.833766717 | 3.088436538 | -0.767584831 | 0.64143071  | 0.743177456 | AF127577.6 |
| ENSG00000156482 | 5906.96977  | 6410.136513 | -0.117952074 | 0.64148432  | 0.743206427 | RPL30      |
| novel.480       | 72.08608949 | 94.10385076 | -0.38423707  | 0.641665965 | 0.743355687 | -          |
| ENSG00000273399 | 5.102253911 | 3.537020296 | 0.524940697  | 0.641670374 | 0.743355687 | AL159169.3 |
| ENSG00000110203 | 0.61420451  | 1.518200796 | -1.299594916 | 0.641707101 | 1           | FOLR3      |
| ENSG00000287727 | 2.666890443 | 4.463713517 | -0.729908733 | 0.641786925 | 0.743457557 | AL139423.2 |
| ENSG00000149716 | 505.5105297 | 457.6721278 | 0.143455015  | 0.641851559 | 0.74349928  | LTO1       |
| ENSG00000281189 | 1.50778846  | 2.812173909 | -0.902872238 | 0.641895014 | 0.743516467 | GHET1      |
| ENSG00000287908 | 3.65116473  | 2.0188195   | 0.833788978  | 0.64192627  | 0.743519523 | AC025165.6 |
| ENSG00000257178 | 3.072276198 | 5.278292898 | -0.77632316  | 0.6419613   | 0.74352695  | AC103702.1 |
| ENSG00000214097 | 1.49643435  | 0.723690511 | 1.055917768  | 0.641986523 | 1           | SMCO1      |
| ENSG00000145491 | 1.538018572 | 2.547679642 | -0.730152208 | 0.6422609   | 0.74384079  | ROPN1L     |
| ENSG00000257315 | 8.720681231 | 6.051706605 | 0.525517969  | 0.642359866 | 0.743905128 | ZBED6      |
| ENSG00000236651 | 1.230916317 | 2.375358513 | -0.966122886 | 0.642373717 | 0.743905128 | DLX2-DT    |
| ENSG00000166452 | 501.2881524 | 543.8805989 | -0.118069989 | 0.642467521 | 0.743980596 | AKIP1      |
| ENSG00000275484 | 6.033661137 | 4.280779903 | 0.493847632  | 0.642541772 | 0.744032156 | AP003419.3 |
| ENSG00000277701 | 31.19094489 | 23.36695965 | 0.421699776  | 0.642590055 | 0.744032156 | AC159540.2 |
| ENSG00000012963 | 45.2011295  | 34.97493842 | 0.365965551  | 0.642597958 | 0.744032156 | UBR7       |
| ENSG00000229751 | 4.761160598 | 2.954969332 | 0.699965035  | 0.64263419  | 0.744040671 | AC044781.1 |

|                 |             |             |              |             |             |            |
|-----------------|-------------|-------------|--------------|-------------|-------------|------------|
| ENSG00000257591 | 5.659759143 | 3.832196145 | 0.555172207  | 0.642662588 | 0.744040671 | ZNF625     |
| ENSG00000263884 | 4.809013064 | 6.614844348 | -0.46740929  | 0.642695311 | 0.744045401 | AP000845.1 |
| ENSG00000182318 | 103.2592267 | 92.65300211 | 0.157662259  | 0.642797121 | 0.744130108 | ZSCAN22    |
| ENSG00000242477 | 2.432856171 | 3.740023006 | -0.607579731 | 0.642827042 | 0.744131589 | AC091429.1 |
| ENSG00000276489 | 0.616711807 | 1.518200796 | -1.295174692 | 0.642827088 | 1           | MIR6829    |
| ENSG00000243024 | 5.753028049 | 3.842808631 | 0.572818669  | 0.642895314 | 0.744177463 | AC012158.1 |
| ENSG00000100150 | 212.9385531 | 192.587975  | 0.144858893  | 0.642950233 | 0.74418998  | DEPDC5     |
| ENSG00000251432 | 35.69976468 | 40.42653274 | -0.177052534 | 0.642966267 | 0.74418998  | LINC02615  |
| ENSG00000196459 | 185.8999349 | 205.6081925 | -0.144796039 | 0.643028023 | 0.74418998  | TRAPPC2    |
| ENSG00000231925 | 10.70058392 | 8.091622682 | 0.409250653  | 0.643071617 | 0.74418998  | TAPBP      |
| ENSG00000272717 | 1.832513069 | 2.822786395 | -0.635226973 | 0.643076215 | 0.74418998  | AC112236.2 |
| ENSG00000244627 | 99.03856193 | 85.67216214 | 0.210806362  | 0.643077989 | 0.74418998  | TPTEP2     |
| ENSG00000090372 | 1959.167985 | 2146.857083 | -0.131883682 | 0.643119397 | 0.74420475  | STRN4      |
| ENSG00000267986 | 0.879722543 | 1.793307549 | -1.015105832 | 0.643128448 | 1           | AC130469.1 |
| ENSG00000142661 | 1.541779519 | 3.454303767 | -1.160205486 | 0.643209605 | 0.744275987 | MYOM3      |
| ENSG00000266111 | 0.586481695 | 1.456837632 | -1.298336953 | 0.643222219 | 1           | AC068025.2 |
| ENSG00000236377 | 0.586481695 | 1.456837632 | -1.298336953 | 0.643222219 | 1           | AC084809.2 |
| ENSG00000178233 | 0.616711807 | 1.487519214 | -1.269662494 | 0.643306241 | 1           | TMEM151B   |
| ENSG00000250906 | 2.3900183   | 1.386017859 | 0.771750173  | 0.64332242  | 0.744373377 | AC131953.1 |
| ENSG00000236439 | 47.16437875 | 38.85274816 | 0.279636672  | 0.643365645 | 0.744390239 | AC099336.2 |
| ENSG00000197562 | 551.1634307 | 611.8833967 | -0.150316947 | 0.643507679 | 0.74452142  | RAB40C     |
| ENSG00000170448 | 176.9572573 | 191.2198429 | -0.112740216 | 0.643577162 | 0.744568654 | NFXL1      |
| ENSG00000173599 | 919.1093381 | 1078.143672 | -0.230496123 | 0.643633603 | 0.744579723 | PC         |
| ENSG00000157881 | 136.2962896 | 109.7605474 | 0.311397772  | 0.643644048 | 0.744579723 | PANK4      |
| ENSG00000207457 | 1.493927053 | 2.629111901 | -0.796959383 | 0.643694442 | 0.744604866 | RNU6-476P  |
| ENSG00000286658 | 0.586481695 | 1.782695063 | -1.597087997 | 0.643814811 | 1           | AC005153.1 |
| ENSG00000268987 | 0.586481695 | 1.782695063 | -1.597087997 | 0.643814811 | 1           | AC011462.3 |
| ENSG00000219355 | 3.355416585 | 4.657388011 | -0.477469185 | 0.643840541 | 0.744740711 | RPL31P52   |
| ENSG00000267533 | 1.232169966 | 2.140389951 | -0.806490423 | 0.643882508 | 0.744756097 | AP002414.4 |
| ENSG00000155621 | 185.3281406 | 200.89445   | -0.116406409 | 0.643949054 | 0.744778595 | C9orf85    |
| ENSG00000162627 | 601.8398314 | 667.5977836 | -0.149882882 | 0.643985917 | 0.744778595 | SNX7       |
| ENSG00000184162 | 160.5101984 | 179.0379511 | -0.159260702 | 0.643987958 | 0.744778595 | NR2C2AP    |
| ENSG00000172845 | 1531.040578 | 1401.791374 | 0.127381437  | 0.644124787 | 0.744820773 | SP3        |
| ENSG00000285458 | 3.959520633 | 5.451898296 | -0.458927119 | 0.644128549 | 0.744820773 | AC093827.5 |
| ENSG00000274315 | 11.139676   | 8.307806417 | 0.413092583  | 0.644137837 | 0.744820773 | AC009318.3 |
| ENSG00000166165 | 1110.214416 | 1234.17022  | -0.152665187 | 0.6441391   | 0.744820773 | CKB        |
| ENSG00000223462 | 1.481319294 | 0.693008929 | 1.083188277  | 0.644316865 | 1           | AL353801.1 |
| ENSG00000204352 | 2.052685933 | 3.812127049 | -0.89130485  | 0.644417877 | 0.745109963 | C9orf129   |
| ENSG00000223791 | 8.666489251 | 6.349194205 | 0.445759937  | 0.64460945  | 0.745288661 | UBE2E1-AS1 |
| ENSG00000285710 | 1.480065645 | 0.693008929 | 1.082192328  | 0.644627252 | 1           | AC012184.4 |
| ENSG00000158480 | 238.4348498 | 259.0932958 | -0.119479301 | 0.644629798 | 0.745288661 | SPATA2     |
| ENSG00000238364 | 0.921306765 | 1.823989131 | -0.986599294 | 0.64472829  | 0.745355834 | RNU7-140P  |
| ENSG00000269997 | 2.109385211 | 3.424906455 | -0.710679405 | 0.644745276 | 0.745355834 | AC068790.3 |
| ENSG00000161677 | 1076.010744 | 992.6665816 | 0.116609709  | 0.644839102 | 0.745394015 | JOSD2      |
| ENSG00000232237 | 0.879722543 | 2.038888596 | -1.212562758 | 0.644856499 | 0.745394015 | ASCL5      |
| ENSG00000213707 | 13.70738529 | 17.09012628 | -0.321991112 | 0.644887592 | 0.745394015 | HMGB1P10   |
| novel.813       | 16.26603397 | 10.97590063 | 0.56470346   | 0.644893063 | 0.745394015 | -          |
| ENSG00000248590 | 3.043299735 | 1.773238453 | 0.773174589  | 0.644987444 | 0.745458109 | GLDCP1     |
| ENSG00000287108 | 1.526664462 | 0.723690511 | 1.079418218  | 0.644991647 | 1           | AC023302.2 |
| ENSG00000012817 | 875.4049907 | 321.5740081 | 1.444708102  | 0.6450059   | 0.745458109 | KDM5D      |
| ENSG00000226180 | 11.25558185 | 8.906330457 | 0.332703954  | 0.645239973 | 0.745695465 | AC010536.1 |

|                 |             |             |              |             |             |            |
|-----------------|-------------|-------------|--------------|-------------|-------------|------------|
| ENSG00000214013 | 356.8283041 | 322.9860931 | 0.144442018  | 0.645391144 | 0.745836994 | GANC       |
| ENSG00000166317 | 3.361684828 | 1.762625967 | 0.924422052  | 0.645461082 | 0.745884641 | SYNPO2L    |
| ENSG00000227879 | 1.201939854 | 2.079026788 | -0.800153822 | 0.645533221 | 0.745934825 | PSPC1P1    |
| ENSG00000224986 | 1.201939854 | 2.169915658 | -0.847315016 | 0.645622082 | 0.746004328 | PPP1R8P1   |
| ENSG00000185958 | 6.713340467 | 4.565214872 | 0.572158578  | 0.645726274 | 0.746091538 | FAM186A    |
| ENSG00000118420 | 83.48329161 | 74.1557614  | 0.171647863  | 0.645772432 | 0.746111689 | UBE3D      |
| ENSG00000286430 | 1.480065645 | 2.812173909 | -0.923998323 | 0.64580454  | 0.746115606 | AC020558.4 |
| ENSG00000101306 | 5.836196493 | 3.068367442 | 0.917499243  | 0.645961926 | 0.746264253 | MYLK2      |
| ENSG00000123600 | 282.7369538 | 307.0351322 | -0.119292219 | 0.646044021 | 0.746303402 | METTL8     |
| ENSG00000198039 | 82.83022364 | 73.81831118 | 0.163263109  | 0.646053263 | 0.746303402 | AC092161.1 |
| ENSG00000178177 | 243.0906601 | 219.0278312 | 0.150772667  | 0.646101834 | 0.746326327 | LCORL      |
| ENSG00000230325 | 3.28360225  | 4.677457107 | -0.503228588 | 0.646131961 | 0.746327946 | AL359921.1 |
| ENSG00000255566 | 5.657251845 | 8.282985426 | -0.546015338 | 0.646187435 | 0.74635884  | AC135279.1 |
| ENSG00000139990 | 1142.182041 | 1063.237465 | 0.103644028  | 0.646252786 | 0.746397192 | DCAF5      |
| ENSG00000140323 | 77.51195726 | 63.10844587 | 0.294575501  | 0.646278097 | 0.746397192 | DISP2      |
| ENSG00000277794 | 0.61420451  | 1.4981317   | -1.282657006 | 0.646367115 | 1           | RF00017    |
| ENSG00000213938 | 0.61420451  | 1.4981317   | -1.282657006 | 0.646367115 | 1           | SEPHS1P6   |
| ENSG00000283296 | 0.61420451  | 1.4981317   | -1.282657006 | 0.646367115 | 1           | MIR4256    |
| ENSG00000287181 | 0.61420451  | 1.4981317   | -1.282657006 | 0.646367115 | 1           | AC107067.2 |
| ENSG00000268423 | 2.388764651 | 1.365948763 | 0.785777681  | 0.646411745 | 0.74651836  | AC093503.2 |
| ENSG00000172404 | 1.511549406 | 0.743759607 | 1.041308349  | 0.64644088  | 1           | DNAJB7     |
| ENSG00000225112 | 5.906401173 | 3.270214277 | 0.857087603  | 0.646538207 | 0.746631219 | AL157392.1 |
| ENSG00000261868 | 1.466204238 | 2.862924587 | -0.957543227 | 0.646618109 | 0.746667656 | MFS1P1     |
| novel.491       | 2.152223082 | 1.110911105 | 0.964098641  | 0.646627237 | 0.746667656 | -          |
| ENSG00000128052 | 461.6029219 | 642.1192071 | -0.476095279 | 0.646662178 | 0.746674816 | KDR        |
| ENSG00000162894 | 50.22795033 | 62.82319336 | -0.322825024 | 0.64673897  | 0.746730299 | FCMR       |
| ENSG00000205108 | 0.925067711 | 2.11916498  | -1.203636199 | 0.646845369 | 0.746819959 | FAM205A    |
| novel.1030      | 358.118356  | 309.0424751 | 0.213571951  | 0.646952686 | 0.746910671 | -          |
| ENSG00000255299 | 1.524157165 | 0.774441189 | 1.014431474  | 0.646978727 | 1           | AP003557.1 |
| ENSG00000206859 | 1.524157165 | 0.774441189 | 1.014431474  | 0.646978727 | 1           | RNU6-767P  |
| ENSG00000181322 | 12.19422623 | 8.845994775 | 0.471798791  | 0.647022859 | 0.74692854  | NME9       |
| ENSG00000119328 | 240.6203794 | 264.8838471 | -0.139611631 | 0.647025662 | 0.74692854  | ABITRAM    |
| ENSG00000139977 | 468.6286823 | 501.2715987 | -0.097002968 | 0.647072329 | 0.746949223 | NAA30      |
| ENSG00000130176 | 193.2372247 | 156.3675368 | 0.306499613  | 0.647190607 | 0.747052566 | CNN1       |
| ENSG00000137171 | 312.8062915 | 340.887811  | -0.123122934 | 0.647236729 | 0.747066837 | KLC4       |
| ENSG00000241343 | 115.6995965 | 131.1497248 | -0.180849921 | 0.647260479 | 0.747066837 | RPL36A     |
| ENSG00000242017 | 5.095985668 | 3.291439249 | 0.638601118  | 0.647333458 | 0.747117879 | ALG1L15P   |
| novel.148       | 1.50778846  | 0.743759607 | 1.038394923  | 0.647370791 | 1           | -          |
| ENSG00000165799 | 1.50778846  | 0.743759607 | 1.038394923  | 0.647370791 | 1           | RNASE7     |
| ENSG00000287201 | 1.50778846  | 0.743759607 | 1.038394923  | 0.647370791 | 1           | AC009682.1 |
| ENSG00000238168 | 0.616711807 | 1.4981317   | -1.278234394 | 0.647489404 | 1           | AC137055.1 |
| ENSG00000234409 | 113.9250642 | 100.4021187 | 0.183708495  | 0.647492186 | 0.747249631 | CCDC188    |
| ENSG00000184787 | 2151.083117 | 2309.747783 | -0.10263015  | 0.647505136 | 0.747249631 | UBE2G2     |
| ENSG00000287555 | 5.348895942 | 3.188782018 | 0.744995476  | 0.647613824 | 0.747341866 | AC023424.3 |
| ENSG00000122515 | 1553.804874 | 1726.804811 | -0.152130366 | 0.647859534 | 0.747592207 | ZMIZ2      |
| ENSG00000119004 | 278.9452372 | 307.5079418 | -0.14155643  | 0.647959354 | 0.747648861 | CYP20A1    |
| novel.968       | 3.534005227 | 1.874739808 | 0.929677375  | 0.647990023 | 0.747648861 | -          |
| ENSG00000175066 | 720.7319437 | 844.9206136 | -0.22951638  | 0.64799496  | 0.747648861 | GK5        |
| ENSG00000232450 | 10.24358475 | 7.970052231 | 0.367483666  | 0.648041903 | 0.747659538 | AL133517.1 |
| ENSG00000149182 | 1714.042599 | 1597.278867 | 0.101693145  | 0.648094157 | 0.747659538 | ARFGAP2    |
| ENSG00000088926 | 2.128261214 | 1.10029862  | 0.959337191  | 0.64811453  | 0.747659538 | F11        |

|                 |             |             |              |             |             |                |
|-----------------|-------------|-------------|--------------|-------------|-------------|----------------|
| ENSG00000132612 | 1132.672885 | 1220.315293 | -0.10743545  | 0.648119322 | 0.747659538 | VPS4A          |
| ENSG00000261572 | 3.666279786 | 2.0188195   | 0.840140854  | 0.648161242 | 0.747674698 | AC097639.1     |
| novel.888       | 37.33528347 | 23.90090969 | 0.644120419  | 0.648367618 | 0.747879554 | -              |
| ENSG00000261757 | 3.67387295  | 5.339784455 | -0.545708789 | 0.64855508  | 0.748062576 | AC005592.1     |
| ENSG00000267765 | 4.469173399 | 2.965581817 | 0.60833413   | 0.648619561 | 0.748100754 | AC100793.3     |
| ENSG00000272754 | 2.098031101 | 1.10029862  | 0.9420828    | 0.648645768 | 0.748100754 | AL133245.1     |
| ENSG00000271943 | 66.2593809  | 59.626239   | 0.154476689  | 0.648815895 | 0.74826375  | AC098614.3     |
| ENSG00000266498 | 1.481319294 | 2.751966622 | -0.896201377 | 0.649028962 | 0.748476251 | AC055811.3     |
| ENSG00000179455 | 4.316982652 | 7.409354633 | -0.783582466 | 0.649077175 | 0.748498627 | MKRN3          |
| ENSG00000229007 | 0.921306765 | 1.803920035 | -0.973471669 | 0.649132398 | 0.748528601 | EXOSC3P1       |
| ENSG00000224358 | 4.498149863 | 6.094156548 | -0.43446523  | 0.649160788 | 0.748528601 | TMCO1-AS1      |
| ENSG00000272502 | 6.363400341 | 8.275840566 | -0.378263558 | 0.649321711 | 0.748680929 | AC104958.2     |
| ENSG00000268896 | 2.094270155 | 1.10029862  | 0.939913641  | 0.649383371 | 0.748718796 | AC009955.3     |
| ENSG00000049759 | 875.9740071 | 1001.618885 | -0.193108828 | 0.649476725 | 0.748793201 | NEDD4L         |
| ENSG00000041982 | 837.4917358 | 1135.801095 | -0.439503319 | 0.649580065 | 0.748879112 | TNC            |
| ENSG00000240024 | 148.8601858 | 130.8065768 | 0.187336458  | 0.649668589 | 0.748947935 | LINC00888      |
| ENSG00000130643 | 6.426367863 | 9.96405074  | -0.631226602 | 0.649755    | 0.749014316 | CALY           |
| ENSG00000286261 | 13.69728483 | 16.72297478 | -0.292455221 | 0.649947796 | 0.749177779 | AC022137.3     |
| ENSG00000251580 | 28.21125342 | 24.18539184 | 0.218298845  | 0.649954472 | 0.749177779 | LINC02482      |
| ENSG00000260802 | 3.07102255  | 1.386017859 | 1.137806596  | 0.649988262 | 0.749181846 | SERTM2         |
| ENSG00000106012 | 524.231357  | 556.6489424 | -0.08643674  | 0.650048997 | 0.749181846 | IQCE           |
| ENSG00000239883 | 65.73063867 | 58.2274253  | 0.175905057  | 0.650064285 | 0.749181846 | PARGP1         |
| ENSG00000281332 | 39.58908063 | 34.02658786 | 0.219567902  | 0.650073344 | 0.749181846 | LINC00997      |
| ENSG00000267323 | 1.49643435  | 0.743759607 | 1.029478889  | 0.650216914 | 1           | SLC25A1P5      |
| ENSG00000255362 | 2.125753916 | 1.161661783 | 0.904197423  | 0.650294098 | 0.749403015 | AP000785.2     |
| ENSG00000233560 | 5.627021733 | 3.495726228 | 0.683020421  | 0.650490663 | 0.749596288 | KRT8P39        |
| ENSG00000223886 | 3.926783224 | 2.557136252 | 0.626237085  | 0.650694282 | 0.749767246 | AC073073.1     |
| ENSG00000257507 | 2.694613258 | 1.456837632 | 0.894020738  | 0.650696735 | 0.749767246 | LINC02373      |
| ENSG00000230929 | 1.232169966 | 2.375358513 | -0.964149786 | 0.650755709 | 0.749801946 | AC099513.1     |
| ENSG00000219682 | 6.099135957 | 8.051612885 | -0.411531409 | 0.650827746 | 0.749851693 | AL133268.1     |
| ENSG00000229623 | 1.493927053 | 0.743759607 | 1.027527467  | 0.650841393 | 1           | METTL21AP1     |
| ENSG00000236484 | 1.493927053 | 0.743759607 | 1.027527467  | 0.650841393 | 1           | RRM2P2         |
| novel.94        | 10.63385545 | 8.345504465 | 0.352897739  | 0.651071059 | 0.750098762 | -              |
| ENSG00000115255 | 95.77308023 | 83.31417579 | 0.204076617  | 0.651124782 | 0.750127393 | REEP6          |
| ENSG00000167914 | 6.594927315 | 4.228744955 | 0.658434436  | 0.6513951   | 0.750405538 | GSDMA          |
| ENSG00000215086 | 0.61420451  | 1.447381022 | -1.239754346 | 0.651769337 | 1           | NPM1P24        |
| ENSG00000275940 | 0.61420451  | 1.447381022 | -1.239754346 | 0.651769337 | 1           | MRPL57P3       |
| ENSG00000119723 | 143.5712949 | 157.6531748 | -0.133621846 | 0.651826538 | 0.750845766 | COQ6           |
| ENSG00000258378 | 2.710981963 | 1.753169357 | 0.617126871  | 0.651835043 | 0.750845766 | AL139021.1     |
| ENSG00000172613 | 244.4395341 | 225.5306089 | 0.116585421  | 0.652017249 | 0.751022351 | RAD9A          |
| ENSG00000206129 | 2.763920295 | 1.00940975  | 1.439266079  | 0.652166315 | 0.75116075  | AC006305.1     |
| ENSG00000118873 | 1014.245013 | 1114.164567 | -0.135393073 | 0.652196836 | 0.751162603 | RAB3GAP2       |
| ENSG00000271119 | 7.610685363 | 5.127325134 | 0.555781769  | 0.6523425   | 0.751297065 | AC026412.3     |
| ENSG00000051128 | 864.8087863 | 796.0784086 | 0.11983371   | 0.652522862 | 0.751471475 | HOMER3         |
| ENSG00000265706 | 0.907445357 | 1.813376645 | -0.996179153 | 0.652593451 | 0.751485657 | SNORD53B       |
| novel.71        | 3.031945625 | 1.885352294 | 0.706886972  | 0.652617402 | 0.751485657 | -              |
| ENSG00000271147 | 45.90971437 | 52.83218545 | -0.20446379  | 0.652625356 | 0.751485657 | ARMCX5-GPRASP2 |
| ENSG00000055950 | 1053.272638 | 1147.78018  | -0.1240453   | 0.652650874 | 0.751485657 | MRPL43         |
| ENSG00000255038 | 1.510295757 | 2.557136252 | -0.753608111 | 0.652727943 | 0.751521793 | AP006287.2     |
| ENSG00000091181 | 2.758834428 | 1.426156051 | 0.947049448  | 0.65274011  | 0.751521793 | IL5RA          |
| ENSG00000160058 | 1547.115662 | 1430.623636 | 0.113195649  | 0.652797501 | 0.751526733 | BSDC1          |

|                 |             |             |              |             |             |             |
|-----------------|-------------|-------------|--------------|-------------|-------------|-------------|
| ENSG00000255150 | 28.25276637 | 34.84630432 | -0.307113969 | 0.652802252 | 0.751526733 | EID3        |
| ENSG00000052723 | 650.7178101 | 709.8029827 | -0.125833758 | 0.652937503 | 0.751649133 | SIKE1       |
| ENSG00000117362 | 2436.908694 | 2288.537862 | 0.090605656  | 0.653198444 | 0.751916206 | APH1A       |
| ENSG00000196776 | 1978.821482 | 1776.176293 | 0.15602782   | 0.653459881 | 0.752167029 | CD47        |
| ENSG00000105647 | 1.480065645 | 2.537067156 | -0.765715602 | 0.653474238 | 0.752167029 | PIK3R2      |
| ENSG00000143867 | 136.4835383 | 113.9251511 | 0.259411997  | 0.653525564 | 0.752192782 | OSR1        |
| ENSG00000233623 | 0.586481695 | 1.386017859 | -1.236738612 | 0.653750186 | 1           | PGAM1P11    |
| novel.992       | 1.759445085 | 0.743759607 | 1.258685872  | 0.653852612 | 1           | -           |
| ENSG00000147481 | 1.759445085 | 0.743759607 | 1.258685872  | 0.653852612 | 1           | SNTG1       |
| ENSG00000274514 | 1.759445085 | 0.743759607 | 1.258685872  | 0.653852612 | 1           | RF00017     |
| ENSG00000239602 | 1.759445085 | 0.743759607 | 1.258685872  | 0.653852612 | 1           | AC091959.2  |
| ENSG00000272235 | 1.49643435  | 2.466247382 | -0.722420359 | 0.653885553 | 0.752537695 | AL590438.1  |
| ENSG00000267260 | 2.771442187 | 4.259554931 | -0.628637043 | 0.653904601 | 0.752537695 | AC020928.1  |
| ENSG00000118194 | 3.047060681 | 1.682349583 | 0.833351818  | 0.653912128 | 0.752537695 | TNNT2       |
| ENSG00000215388 | 6.870545809 | 4.401194479 | 0.648888019  | 0.654049074 | 0.752655126 | ACTG1P3     |
| ENSG00000130511 | 1138.534006 | 1266.689393 | -0.154104787 | 0.654106231 | 0.752655126 | SSBP4       |
| ENSG00000260213 | 3.344062475 | 2.099095884 | 0.658853326  | 0.654115134 | 0.752655126 | AC092718.2  |
| ENSG00000103111 | 769.2501082 | 725.5761002 | 0.084472081  | 0.654130047 | 0.752655126 | MON1B       |
| ENSG00000275227 | 4.45656564  | 2.985650913 | 0.597580454  | 0.654202799 | 0.752705501 | RF02271     |
| ENSG00000273355 | 2.758834428 | 4.22887335  | -0.625489297 | 0.654398062 | 0.752862246 | AP000894.4  |
| ENSG00000229399 | 1.521649867 | 0.743759607 | 1.048313664  | 0.65441632  | 1           | AL592148.1  |
| ENSG00000264500 | 1.521649867 | 0.743759607 | 1.048313664  | 0.65441632  | 1           | MIR3124     |
| ENSG00000166860 | 207.8975854 | 191.5866904 | 0.118655179  | 0.654420649 | 0.752862246 | ZBTB39      |
| ENSG00000132357 | 255.5755479 | 230.180291  | 0.150449373  | 0.654425964 | 0.752862246 | CARD6       |
| ENSG00000258858 | 2.463086283 | 1.161661783 | 1.104107599  | 0.654610792 | 0.753041531 | AL583722.4  |
| ENSG00000267544 | 3.002969161 | 1.874739808 | 0.700884965  | 0.654768219 | 0.753189281 | AC007229.1  |
| ENSG00000226261 | 2.34592678  | 1.029478846 | 1.179116749  | 0.654889217 | 0.753261765 | AC064836.1  |
| ENSG00000212418 | 2.34592678  | 1.029478846 | 1.179116749  | 0.654889217 | 0.753261765 | RNY4P36     |
| ENSG00000220323 | 26.91235498 | 31.64202953 | -0.235715866 | 0.654920712 | 0.753264643 | HIST2H2BD   |
| ENSG00000103051 | 1369.936623 | 1471.680008 | -0.103326598 | 0.654989692 | 0.753310632 | COG4        |
| ENSG00000197385 | 7.95937184  | 11.07868626 | -0.485339707 | 0.655057624 | 0.753355413 | ZNF860      |
| ENSG00000233783 | 4.223785018 | 2.954969332 | 0.530383278  | 0.655673394 | 0.754030208 | AP001442.1  |
| ENSG00000276261 | 5.72906618  | 4.290236513 | 0.41661702   | 0.655710813 | 0.754039863 | AC009509.4  |
| ENSG00000043093 | 642.9942685 | 604.0196442 | 0.089829128  | 0.65581499  | 0.754126284 | DCUN1D1     |
| ENSG00000229161 | 0.61420451  | 1.456837632 | -1.248349803 | 0.655877575 | 1           | TCP1P1      |
| ENSG00000270804 | 38.94937587 | 45.30802004 | -0.213838159 | 0.655969546 | 0.754262247 | AC010326.4  |
| ENSG00000269902 | 15.96853398 | 11.32054289 | 0.500941446  | 0.655994196 | 0.754262247 | AC234772.2  |
| ENSG00000214389 | 287.236883  | 319.2724924 | -0.153014587 | 0.656020322 | 0.754262247 | RPS3AP26    |
| ENSG00000253607 | 1.538018572 | 2.527610546 | -0.721153495 | 0.656059973 | 0.754274457 | AC104316.1  |
| ENSG00000154175 | 674.4608156 | 873.3359181 | -0.37296124  | 0.65615946  | 0.754355455 | ABI3BP      |
| ENSG00000214842 | 0.616711807 | 1.782695063 | -1.536666093 | 0.656162518 | 1           | RAD51AP2    |
| ENSG00000013374 | 1249.551768 | 1166.577815 | 0.098919923  | 0.656295533 | 0.754478507 | NUB1        |
| ENSG00000236711 | 1.759445085 | 3.657434872 | -1.048043491 | 0.656342219 | 0.754498792 | SMAD9-IT1   |
| ENSG00000253683 | 181.7930243 | 164.7367192 | 0.141951275  | 0.656405714 | 0.754538397 | AC027309.2  |
| ENSG00000184047 | 51.74193611 | 45.13235968 | 0.197580662  | 0.656471909 | 0.754581102 | DIABLO      |
| ENSG00000251314 | 1.22840902  | 2.618499415 | -1.089427357 | 0.656501996 | 0.754582303 | AC104123.1  |
| ENSG00000206573 | 494.8548919 | 453.9433936 | 0.124792855  | 0.656553563 | 0.75460819  | THUMPD3-AS1 |
| ENSG00000224598 | 2.108131562 | 1.130980201 | 0.919824015  | 0.656665035 | 0.754702923 | RPS5P2      |
| ENSG00000258439 | 2.40137241  | 1.41669944  | 0.757486471  | 0.656728534 | 0.754716545 | AC007956.1  |
| ENSG00000137275 | 762.478431  | 706.6757738 | 0.109575679  | 0.656734985 | 0.754716545 | RIPK1       |
| ENSG00000189043 | 2528.032018 | 2352.283511 | 0.103999693  | 0.657019145 | 0.755009704 | NDUFA4      |

|                 |             |             |              |             |             |               |
|-----------------|-------------|-------------|--------------|-------------|-------------|---------------|
| ENSG00000227536 | 3.021845164 | 4.361056287 | -0.524096773 | 0.657285891 | 0.755282828 | SOCS5P4       |
| ENSG00000178538 | 1.233423615 | 0.387220594 | 1.672613286  | 0.657420998 | 1           | CA8           |
| ENSG00000287169 | 1.233423615 | 0.387220594 | 1.672613286  | 0.657420998 | 1           | AC107050.1    |
| ENSG00000275519 | 1.233423615 | 0.387220594 | 1.672613286  | 0.657420998 | 1           | MIR6804       |
| ENSG00000223663 | 1.233423615 | 0.387220594 | 1.672613286  | 0.657420998 | 1           | NDUFB4P8      |
| ENSG00000268324 | 1.233423615 | 0.387220594 | 1.672613286  | 0.657420998 | 1           | LRRC2-AS1     |
| ENSG00000254538 | 1.233423615 | 0.387220594 | 1.672613286  | 0.657420998 | 1           | AC027018.1    |
| ENSG00000204001 | 1.233423615 | 0.387220594 | 1.672613286  | 0.657420998 | 1           | LCN8          |
| ENSG00000284981 | 4.22127772  | 6.306615868 | -0.57136987  | 0.657484871 | 0.755478061 | AC093668.2    |
| ENSG00000099326 | 582.8159621 | 523.5666299 | 0.155171369  | 0.657529318 | 0.75549572  | MZF1          |
| ENSG00000185864 | 4.193554905 | 2.91483114  | 0.535644042  | 0.657631578 | 0.7555798   | NPIP4         |
| ENSG00000112972 | 560.8816911 | 509.823749  | 0.137772778  | 0.6576908   | 0.755614428 | HMGCS1        |
| ENSG00000170035 | 1210.431639 | 1329.650434 | -0.135753004 | 0.658017734 | 0.755956611 | UBE2E3        |
| ENSG00000233198 | 2.743719372 | 3.984448178 | -0.537782935 | 0.658227205 | 0.756161314 | RNF224        |
| ENSG00000189060 | 2487.539023 | 2163.600633 | 0.201399417  | 0.658254126 | 0.756161314 | H1F0          |
| ENSG00000257950 | 9.351254446 | 11.55551145 | -0.301490707 | 0.65840457  | 0.756300696 | P2RX5-TAX1BP3 |
| ENSG00000176720 | 592.2464475 | 708.9094115 | -0.259547482 | 0.658484473 | 0.756354898 | BOK           |
| ENSG00000168591 | 920.3481646 | 869.281384  | 0.082271177  | 0.65850998  | 0.756354898 | TMUB2         |
| ENSG00000172345 | 21.27766881 | 16.19141771 | 0.401315906  | 0.658626492 | 0.75644709  | STARD5        |
| ENSG00000104524 | 8.558390023 | 12.64879361 | -0.567020542 | 0.658648477 | 0.75644709  | PYCR3         |
| ENSG00000161652 | 1.22840902  | 0.387220594 | 1.6671897    | 0.658657224 | 1           | IZUMO2        |
| ENSG00000222726 | 1.22840902  | 0.387220594 | 1.6671897    | 0.658657224 | 1           | RNU2-7P       |
| ENSG00000253430 | 1.22840902  | 0.387220594 | 1.6671897    | 0.658657224 | 1           | AC011726.2    |
| ENSG00000151923 | 1883.483151 | 1995.193691 | -0.082977358 | 0.658708724 | 0.756452755 | TIAL1         |
| ENSG00000141560 | 790.6029098 | 863.5498151 | -0.127734722 | 0.658711641 | 0.756452755 | FN3KRP        |
| ENSG00000285641 | 4.002358504 | 2.547679642 | 0.65321498   | 0.658803717 | 0.75652001  | AL358472.6    |
| ENSG00000133065 | 925.7154756 | 1061.167193 | -0.196919754 | 0.658828442 | 0.75652001  | SLC41A1       |
| ENSG00000170629 | 58.11368506 | 50.64818968 | 0.197865172  | 0.658880932 | 0.756526414 | DPY19L2P2     |
| ENSG00000273989 | 2.402626059 | 4.374108917 | -0.871323178 | 0.658892256 | 0.756526414 | AC022079.1    |
| ENSG00000237851 | 1.233423615 | 0.356539013 | 1.672636805  | 0.659214516 | 1           | AL023584.2    |
| ENSG00000259755 | 1.233423615 | 0.356539013 | 1.672636805  | 0.659214516 | 1           | AC090907.2    |
| ENSG00000233502 | 1.233423615 | 0.356539013 | 1.672636805  | 0.659214516 | 1           | AC104794.1    |
| ENSG00000258428 | 1.233423615 | 0.356539013 | 1.672636805  | 0.659214516 | 1           | AL161757.2    |
| ENSG00000128513 | 357.7087108 | 387.4519774 | -0.114760896 | 0.659250694 | 0.756904516 | POT1          |
| ENSG00000115421 | 298.2415637 | 274.6792071 | 0.119081665  | 0.659295236 | 0.756922206 | PAPOLG        |
| ENSG00000180979 | 345.9626369 | 320.3885747 | 0.110513256  | 0.659379298 | 0.756985266 | LRRC57        |
| ENSG00000278986 | 3.269740843 | 2.160459047 | 0.605303331  | 0.659424883 | 0.757004148 | AC091060.1    |
| ENSG00000230953 | 5.088392504 | 3.53586442  | 0.521681403  | 0.65960804  | 0.757180952 | AC099677.1    |
| ENSG00000011143 | 236.7572482 | 255.8769143 | -0.112792066 | 0.659754229 | 0.757315305 | MKS1          |
| ENSG00000254263 | 2.067800989 | 1.060160428 | 0.963038299  | 0.65985391  | 0.757396264 | AC022973.3    |
| ENSG00000235445 | 0.308355904 | 1.069617038 | -1.717770026 | 0.660080807 | 1           | AC016027.3    |
| ENSG00000243307 | 0.308355904 | 1.069617038 | -1.717770026 | 0.660080807 | 1           | POM121L6P     |
| ENSG00000222378 | 0.308355904 | 1.069617038 | -1.717770026 | 0.660080807 | 1           | RNA5SP44      |
| ENSG00000226954 | 0.308355904 | 1.069617038 | -1.717770026 | 0.660080807 | 1           | AL023802.1    |
| ENSG00000242551 | 0.307102255 | 1.069617038 | -1.717769264 | 0.660169424 | 1           | POU5F1P6      |
| ENSG00000242330 | 0.307102255 | 1.069617038 | -1.717769264 | 0.660169424 | 1           | RN7SL683P     |
| ENSG00000267417 | 0.307102255 | 1.069617038 | -1.717769264 | 0.660169424 | 1           | AC138474.1    |
| ENSG00000252282 | 0.307102255 | 1.069617038 | -1.717769264 | 0.660169424 | 1           | RNU6-1089P    |
| ENSG00000201432 | 0.307102255 | 1.069617038 | -1.717769264 | 0.660169424 | 1           | RF00019       |
| ENSG00000259196 | 0.307102255 | 1.069617038 | -1.717769264 | 0.660169424 | 1           | HMBBOX1-IT1   |
| ENSG00000226792 | 0.307102255 | 1.069617038 | -1.717769264 | 0.660169424 | 1           | C13orf42      |

|                 |             |             |              |             |             |            |
|-----------------|-------------|-------------|--------------|-------------|-------------|------------|
| ENSG00000226756 | 2.082916045 | 1.110911105 | 0.923789478  | 0.660194072 | 0.757753233 | AC007365.1 |
| ENSG00000180251 | 1.233423615 | 0.336469917 | 1.672652298  | 0.660404508 | 1           | SLC9A4     |
| ENSG00000240890 | 1.233423615 | 0.336469917 | 1.672652298  | 0.660404508 | 1           | AC020633.1 |
| ENSG00000187048 | 1.233423615 | 0.336469917 | 1.672652298  | 0.660404508 | 1           | CYP4A11    |
| ENSG00000287434 | 1.233423615 | 0.336469917 | 1.672652298  | 0.660404508 | 1           | AC109133.1 |
| ENSG00000250483 | 1.233423615 | 0.336469917 | 1.672652298  | 0.660404508 | 1           | PPM1AP1    |
| ENSG00000248459 | 1.233423615 | 0.336469917 | 1.672652298  | 0.660404508 | 1           | AC083906.1 |
| ENSG00000146276 | 1.22840902  | 0.356539013 | 1.667207883  | 0.660453301 | 1           | GABRR1     |
| ENSG00000169059 | 1.22840902  | 0.356539013 | 1.667207883  | 0.660453301 | 1           | VCX3A      |
| ENSG00000197721 | 1.22840902  | 0.356539013 | 1.667207883  | 0.660453301 | 1           | CR1L       |
| ENSG00000223724 | 1.22840902  | 0.356539013 | 1.667207883  | 0.660453301 | 1           | RAD17P2    |
| ENSG00000226144 | 1.22840902  | 0.356539013 | 1.667207883  | 0.660453301 | 1           | RPS27AP3   |
| ENSG00000183655 | 157.551392  | 171.8061362 | -0.125391472 | 0.660556298 | 0.758135494 | KLHL25     |
| ENSG00000184361 | 1.215801261 | 2.11916498  | -0.808922909 | 0.660624323 | 0.758180075 | SPATA32    |
| ENSG00000254911 | 0.925067711 | 1.793307549 | -0.962473694 | 0.660736567 | 0.758275398 | SCARNA9    |
| ENSG00000166492 | 37.70492632 | 52.3834733  | -0.473232789 | 0.660925313 | 0.758431823 | FAM86GP    |
| ENSG00000287879 | 1.22840902  | 2.587817834 | -1.074122453 | 0.660931254 | 0.758431823 | AC114341.2 |
| ENSG00000174197 | 575.5557272 | 534.5687635 | 0.106203481  | 0.660978795 | 0.758452878 | MGA        |
| ENSG00000229509 | 0.293240848 | 1.069617038 | -1.717760816 | 0.661153971 | 1           | AC244023.1 |
| ENSG00000252414 | 0.293240848 | 1.069617038 | -1.717760816 | 0.661153971 | 1           | RNU6-100P  |
| ENSG00000218713 | 0.293240848 | 1.069617038 | -1.717760816 | 0.661153971 | 1           | AL512378.1 |
| ENSG00000259548 | 0.293240848 | 1.069617038 | -1.717760816 | 0.661153971 | 1           | AC021483.1 |
| ENSG00000226925 | 0.293240848 | 1.069617038 | -1.717760816 | 0.661153971 | 1           | IL1R1-AS1  |
| ENSG00000236018 | 0.293240848 | 1.069617038 | -1.717760816 | 0.661153971 | 1           | AC004898.1 |
| ENSG00000226641 | 0.293240848 | 1.069617038 | -1.717760816 | 0.661153971 | 1           | AL391647.1 |
| ENSG00000232684 | 0.293240848 | 1.069617038 | -1.717760816 | 0.661153971 | 1           | ATP11A-AS1 |
| ENSG00000240003 | 0.293240848 | 1.069617038 | -1.717760816 | 0.661153971 | 1           | RPL7P24    |
| ENSG00000223086 | 0.293240848 | 1.069617038 | -1.717760816 | 0.661153971 | 1           | RNA5SP155  |
| ENSG00000251798 | 0.293240848 | 1.069617038 | -1.717760816 | 0.661153971 | 1           | RNU6-863P  |
| ENSG00000207646 | 0.293240848 | 1.069617038 | -1.717760816 | 0.661153971 | 1           | MIR655     |
| ENSG00000266433 | 0.293240848 | 1.069617038 | -1.717760816 | 0.661153971 | 1           | TBC1D3P5   |
| ENSG00000104941 | 0.293240848 | 1.069617038 | -1.717760816 | 0.661153971 | 1           | RSPH6A     |
| ENSG00000235681 | 0.293240848 | 1.069617038 | -1.717760816 | 0.661153971 | 1           | AC245884.3 |
| ENSG00000213695 | 2.421502061 | 1.436768536 | 0.753264693  | 0.661248657 | 0.758700816 | RPS7P14    |
| ENSG00000254035 | 9.717563277 | 7.461261186 | 0.376903973  | 0.661253272 | 0.758700816 | AC104117.3 |
| ENSG00000187045 | 5.955507288 | 8.752794155 | -0.549906157 | 0.66130605  | 0.758727864 | TMPRSS6    |
| ENSG00000140557 | 3.658757893 | 5.696195073 | -0.629641544 | 0.661422008 | 0.758827395 | ST8SIA2    |
| ENSG00000152601 | 2923.789694 | 2596.94811  | 0.170903697  | 0.661516512 | 0.758902305 | MBNL1      |
| ENSG00000205642 | 1.22840902  | 0.336469917 | 1.66721986   | 0.66164502  | 1           | VCX3B      |
| ENSG00000287836 | 1.22840902  | 0.336469917 | 1.66721986   | 0.66164502  | 1           | AC016168.4 |
| ENSG00000267193 | 1.22840902  | 0.336469917 | 1.66721986   | 0.66164502  | 1           | AC023421.2 |
| ENSG00000256533 | 1.22840902  | 0.336469917 | 1.66721986   | 0.66164502  | 1           | AP002373.2 |
| ENSG00000287961 | 1.22840902  | 0.336469917 | 1.66721986   | 0.66164502  | 1           | AC020911.3 |
| ENSG00000126432 | 3145.224066 | 3416.522506 | -0.119317663 | 0.661885571 | 0.759281565 | PRDX5      |
| ENSG00000256625 | 2.406387005 | 1.436768536 | 0.746004012  | 0.661909496 | 0.759281565 | AC092747.2 |
| ENSG00000065970 | 579.3666199 | 537.9318748 | 0.107494742  | 0.661934778 | 0.759281565 | FOXJ2      |
| ENSG00000165409 | 2.416487466 | 1.456837632 | 0.737190632  | 0.662018589 | 0.759344178 | TSHR       |
| ENSG00000196860 | 6.373500802 | 4.809640044 | 0.419419421  | 0.662243658 | 0.759568801 | TOMM20L    |
| ENSG00000201563 | 2.111892509 | 1.161661783 | 0.894628505  | 0.66233638  | 0.759641615 | RF00019    |
| ENSG00000225695 | 7.294807567 | 9.213274667 | -0.34327171  | 0.662454149 | 0.759743147 | HNRNPA1P35 |
| ENSG00000231940 | 3.270994492 | 1.813376645 | 0.85634837   | 0.662495636 | 0.75975719  | RPS7P3     |

|                 |             |             |              |             |             |            |
|-----------------|-------------|-------------|--------------|-------------|-------------|------------|
| ENSG00000103534 | 1.495180701 | 0.774441189 | 0.990185639  | 0.662549502 | 1           | TMC5       |
| ENSG00000287195 | 1.495180701 | 0.774441189 | 0.990185639  | 0.662549502 | 1           | AC131568.1 |
| ENSG00000125503 | 2228.587663 | 2100.486754 | 0.085559451  | 0.66256204  | 0.759799805 | PPP1R12C   |
| ENSG00000287829 | 0.922560414 | 1.742556871 | -0.932604775 | 0.662984725 | 1           | AC002542.2 |
| ENSG00000169951 | 193.0299158 | 177.740078  | 0.118740494  | 0.663118592 | 0.760404472 | ZNF764     |
| ENSG00000141034 | 326.5463433 | 355.8646329 | -0.123197706 | 0.663181653 | 0.760416393 | GID4       |
| ENSG00000171763 | 267.7414113 | 290.3033902 | -0.116898752 | 0.663187524 | 0.760416393 | SPATA5L1   |
| ENSG00000254531 | 59.90260481 | 68.52213254 | -0.196209615 | 0.663484359 | 0.760723174 | AP001816.1 |
| ENSG00000250049 | 4.192301256 | 6.217011268 | -0.573864009 | 0.663622001 | 0.760847413 | AC114316.1 |
| ENSG00000248015 | 7.002820368 | 5.381078522 | 0.377885288  | 0.663861761 | 0.761056903 | AC005329.1 |
| ENSG00000183397 | 79.03249567 | 90.07078808 | -0.186087531 | 0.663863307 | 0.761056903 | C19orf71   |
| ENSG00000287170 | 3.064683035 | 4.320918095 | -0.499603501 | 0.66390777  | 0.761074293 | AC010327.8 |
| ENSG00000167272 | 473.8611026 | 531.6849439 | -0.166658985 | 0.66400337  | 0.761120269 | POP5       |
| ENSG00000153406 | 35.37120785 | 31.3361128  | 0.17661802   | 0.664006467 | 0.761120269 | NMRAL1     |
| ENSG00000104863 | 136.4145598 | 150.1007679 | -0.136595874 | 0.664106973 | 0.761201891 | LIN7B      |
| ENSG00000269102 | 1.774560141 | 2.884149558 | -0.690135055 | 0.664165478 | 0.761235366 | AC010320.3 |
| ENSG00000198887 | 948.3098852 | 887.7541417 | 0.095213986  | 0.664285529 | 0.761339377 | SMC5       |
| ENSG00000260261 | 34.79454189 | 28.37309952 | 0.291276372  | 0.664513443 | 0.761566994 | AC124944.2 |
| ENSG00000102683 | 8.29552183  | 5.186248153 | 0.681451089  | 0.664888552 | 0.761947959 | SGCG       |
| ENSG00000122591 | 1624.42711  | 1810.715348 | -0.156477935 | 0.664904512 | 0.761947959 | FAM126A    |
| ENSG00000277324 | 1.481319294 | 2.476859868 | -0.737192095 | 0.665048164 | 0.762078964 | AC093462.1 |
| ENSG00000259367 | 0.586481695 | 1.365948763 | -1.218895476 | 0.665207529 | 1           | AC087286.2 |
| ENSG00000222051 | 0.586481695 | 1.365948763 | -1.218895476 | 0.665207529 | 1           | RNU6-1165P |
| ENSG00000101126 | 1639.502286 | 1533.133001 | 0.096836355  | 0.665251807 | 0.762278698 | ADNP       |
| ENSG00000267048 | 1.773306493 | 2.985650913 | -0.733082556 | 0.665400551 | 0.762409039 | AC092143.3 |
| ENSG00000184014 | 2451.502652 | 2298.349262 | 0.093024433  | 0.665424247 | 0.762409039 | DENND5A    |
| ENSG00000272980 | 3.667533435 | 2.292641984 | 0.697458156  | 0.665550352 | 0.762519896 | Z94721.2   |
| ENSG00000245059 | 2.417741115 | 1.518200796 | 0.699978574  | 0.665694511 | 0.762596878 | AC092718.1 |
| ENSG00000254759 | 1.816144364 | 1.049547942 | 0.775935948  | 0.665701536 | 0.762596878 | NAP1L1P1   |
| ENSG00000166037 | 774.4744225 | 721.587684  | 0.102098878  | 0.665709552 | 0.762596878 | CEP57      |
| ENSG00000251258 | 1.230916317 | 2.261960402 | -0.871383417 | 0.665734952 | 0.762596878 | RFPL4B     |
| ENSG00000111450 | 1096.179731 | 1202.052704 | -0.132877568 | 0.665774454 | 0.762608504 | STX2       |
| ENSG00000188070 | 636.6526617 | 565.8106142 | 0.169890369  | 0.665860593 | 0.762662855 | C11orf95   |
| ENSG00000178605 | 1407.025635 | 1534.548036 | -0.125277563 | 0.665880613 | 0.762662855 | GTPBP6     |
| ENSG00000165794 | 1.539272221 | 0.672939833 | 1.164881387  | 0.665882983 | 1           | SLC39A2    |
| ENSG00000233822 | 18.32011609 | 22.04371762 | -0.267241795 | 0.665983248 | 0.762738419 | HIST1H2BN  |
| ENSG00000066583 | 253.2093066 | 218.7529941 | 0.210056121  | 0.666005303 | 0.762738419 | ISOC1      |
| ENSG00000286299 | 3.677633896 | 5.258352196 | -0.526669326 | 0.666077114 | 0.762787037 | AL121938.1 |
| ENSG00000198216 | 4.907296564 | 3.067083173 | 0.693452898  | 0.666152871 | 0.762840168 | CACNA1E    |
| ENSG00000274441 | 2.113146158 | 3.32212083  | -0.643003297 | 0.66618872  | 0.762847597 | AC008957.2 |
| ENSG00000068028 | 1359.098934 | 1447.589743 | -0.091013865 | 0.666254713 | 0.762889541 | RASSF1     |
| ENSG00000223298 | 1.200686205 | 2.272572888 | -0.905287237 | 0.666307767 | 0.762900873 | RNY3P8     |
| ENSG00000048649 | 906.9606601 | 983.6997133 | -0.116907638 | 0.666323336 | 0.762900873 | RSF1       |
| ENSG00000254362 | 2.756327131 | 1.548882377 | 0.855031756  | 0.666368677 | 0.762919165 | AC011726.3 |
| ENSG00000236915 | 0.61420451  | 1.386017859 | -1.187277048 | 0.666576824 | 1           | CLCA4-AS1  |
| ENSG00000257390 | 0.61420451  | 1.386017859 | -1.187277048 | 0.666576824 | 1           | AC023055.1 |
| ENSG00000264386 | 0.61420451  | 1.386017859 | -1.187277048 | 0.666576824 | 1           | MIR4513    |
| ENSG00000183604 | 47.52001765 | 41.2223273  | 0.205935436  | 0.666880524 | 0.76347153  | SMG1P5     |
| ENSG00000251393 | 2.743719372 | 1.773238453 | 0.620814879  | 0.666977761 | 0.763549205 | AC005280.1 |
| ENSG00000137770 | 551.5885738 | 587.5942383 | -0.091475697 | 0.667037867 | 0.763584368 | CTD SPL2   |
| ENSG00000079337 | 106.3269862 | 93.57255047 | 0.184611596  | 0.667110155 | 0.763626248 | RAPGEF3    |



|                 |             |             |              |             |             |            |
|-----------------|-------------|-------------|--------------|-------------|-------------|------------|
| ENSG00000235989 | 2.775203133 | 1.069617038 | 1.372480796  | 0.667133235 | 0.763626248 | MORC2-AS1  |
| ENSG00000249572 | 10.03852694 | 12.4113849  | -0.301840658 | 0.667324601 | 0.763811641 | AC034231.1 |
| ENSG00000285744 | 2.082916045 | 3.260757667 | -0.637183063 | 0.667413311 | 0.763879525 | AC083837.1 |
| ENSG00000171456 | 1608.057536 | 1769.520192 | -0.137932142 | 0.667452606 | 0.763890849 | ASXL1      |
| ENSG00000158571 | 5.424471223 | 4.045811341 | 0.436804119  | 0.667555488 | 0.763924728 | PFKFB1     |
| ENSG00000174038 | 2.653029035 | 1.406086955 | 0.91306135   | 0.667560819 | 0.763924728 | C9orf131   |
| ENSG00000232973 | 38.12950064 | 27.77786753 | 0.456640595  | 0.667570417 | 0.763924728 | CYP1B1-AS1 |
| ENSG00000226328 | 126.5098893 | 140.1738201 | -0.147800362 | 0.667659547 | 0.763993071 | NUP50-DT   |
| ENSG00000137965 | 1968.409861 | 1794.434553 | 0.133490644  | 0.667747027 | 0.764059523 | IFI44      |
| ENSG00000279948 | 8.647613248 | 11.86001552 | -0.447498224 | 0.667947899 | 0.764255708 | AC008895.1 |
| ENSG00000213036 | 9.017683025 | 6.990168187 | 0.378724846  | 0.668070828 | 0.764362699 | AL445305.1 |
| ENSG00000204580 | 0.922560414 | 2.0188195   | -1.144081774 | 0.668174232 | 0.764447344 | DDR1       |
| ENSG00000232273 | 1.17296339  | 2.241891306 | -0.915200514 | 0.668244297 | 0.764493839 | FTH1P1     |
| ENSG00000258944 | 6.928498736 | 5.156722446 | 0.437608758  | 0.668506658 | 0.764760313 | AC004846.2 |
| ENSG00000219891 | 32.61022213 | 27.18293951 | 0.258118011  | 0.668607783 | 0.764842322 | ZSCAN12P1  |
| ENSG00000232196 | 3.896553111 | 5.655029401 | -0.538619113 | 0.668707703 | 0.764922944 | MTRNR2L4   |
| ENSG00000141582 | 556.8718082 | 504.8414842 | 0.141814893  | 0.669141365 | 0.765364547 | CBX4       |
| ENSG00000186081 | 4.888420562 | 3.12857473  | 0.632288108  | 0.669152676 | 0.765364547 | KRT5       |
| ENSG00000276058 | 2.095523804 | 1.161661783 | 0.884497332  | 0.669215873 | 0.765403134 | STMN1P1    |
| novel.467       | 355.9828139 | 325.8618738 | 0.127601898  | 0.669294496 | 0.765459361 | -          |
| ENSG00000125731 | 41.96767355 | 36.84821838 | 0.188544899  | 0.669359111 | 0.765499562 | SH2D3A     |
| ENSG00000228137 | 7.152432547 | 5.12488499  | 0.489895776  | 0.669416039 | 0.765509652 | AP001469.2 |
| ENSG00000071054 | 7673.957247 | 7200.525252 | 0.09188929   | 0.669426861 | 0.765509652 | MAP4K4     |
| ENSG00000188452 | 0.922560414 | 1.762625967 | -0.945156359 | 0.669486959 | 0.765542645 | CERKL      |
| ENSG00000254431 | 1.200686205 | 2.171071533 | -0.848918008 | 0.669539578 | 0.765542645 | AC084083.1 |
| ENSG00000280381 | 2.094270155 | 3.311508345 | -0.649619094 | 0.669561962 | 0.765542645 | AC026362.2 |
| ENSG00000188185 | 67.71151027 | 76.21232613 | -0.170112377 | 0.669573576 | 0.765542645 | LINC00265  |
| ENSG00000270264 | 0.925067711 | 1.753169357 | -0.935625674 | 0.669676973 | 1           | NDUFB8P2   |
| ENSG00000113384 | 1996.944605 | 2115.460937 | -0.083290661 | 0.669682459 | 0.765633442 | GOLPH3     |
| ENSG00000144218 | 125.5046854 | 95.242361   | 0.39763153   | 0.669727957 | 0.765651767 | AFF3       |
| ENSG00000124508 | 306.1324549 | 340.0670199 | -0.150983314 | 0.66976004  | 0.765654754 | BTN2A2     |
| ENSG00000143776 | 1381.204227 | 1300.916937 | 0.086280846  | 0.669871019 | 0.765747929 | CDC42BPA   |
| ENSG00000234406 | 0.923814062 | 1.762625967 | -0.943716917 | 0.669967509 | 0.765824535 | AC004129.2 |
| ENSG00000183914 | 7.599331253 | 5.676254372 | 0.415286206  | 0.670063053 | 0.765900052 | DNAH2      |
| ENSG00000128245 | 3168.984201 | 2939.504064 | 0.108325608  | 0.670308551 | 0.766146956 | YWHAH      |
| ENSG00000262580 | 63.75797315 | 54.41162101 | 0.230391651  | 0.670416318 | 0.766236422 | AC087741.1 |
| ENSG00000174567 | 0.61420451  | 1.396630344 | -1.195642345 | 0.670482114 | 1           | GOLT1A     |
| ENSG00000171723 | 282.3588636 | 305.8487781 | -0.114480409 | 0.670628465 | 0.766445174 | GPHN       |
| ENSG00000225572 | 0.908699006 | 1.782695063 | -0.974616804 | 0.670877966 | 0.766696597 | DOCK4-AS1  |
| ENSG00000163297 | 2695.185097 | 2909.435962 | -0.110245978 | 0.671111589 | 0.766929852 | ANTXR2     |
| ENSG00000161920 | 202.7314664 | 186.1103223 | 0.122592352  | 0.671205    | 0.767002864 | MED11      |
| ENSG00000224614 | 7.553986085 | 5.23699883  | 0.538903423  | 0.671276623 | 0.767050971 | TNK2-AS1   |
| ENSG00000111832 | 1145.763598 | 1073.954724 | 0.093100687  | 0.67153545  | 0.767291124 | RWDD1      |
| ENSG00000188825 | 56.21967159 | 50.50410999 | 0.154359147  | 0.67156731  | 0.767291124 | LINC00910  |
| ENSG00000065618 | 4.267876537 | 6.133138864 | -0.52414948  | 0.671582389 | 0.767291124 | COL17A1    |
| ENSG00000228069 | 2.052685933 | 0.774441189 | 1.426684671  | 0.671663987 | 0.767291124 | MTCO3P29   |
| ENSG00000175868 | 2.052685933 | 0.774441189 | 1.426684671  | 0.671663987 | 0.767291124 | CALCB      |
| ENSG00000237200 | 2.052685933 | 0.774441189 | 1.426684671  | 0.671663987 | 0.767291124 | ZBTB40-IT1 |
| ENSG00000266844 | 2.653029035 | 1.447381022 | 0.881761895  | 0.671696627 | 0.767294674 | AC093330.1 |
| ENSG00000279331 | 7.886303857 | 9.711453227 | -0.300306376 | 0.671770697 | 0.767345547 | RBM12B-AS1 |
| ENSG00000011198 | 391.002828  | 418.9210438 | -0.099153521 | 0.67182744  | 0.767376626 | ABHD5      |

|                 |             |             |              |             |             |              |
|-----------------|-------------|-------------|--------------|-------------|-------------|--------------|
| ENSG00000286159 | 4.706968617 | 2.864080462 | 0.720304379  | 0.671953764 | 0.767487173 | AL035106.1   |
| ENSG00000151611 | 120.5965357 | 129.8626398 | -0.107119832 | 0.67213602  | 0.767661594 | MMAA         |
| ENSG00000212829 | 2.155984028 | 1.00940975  | 1.072334569  | 0.672187103 | 0.76768619  | RPS26P3      |
| ENSG00000199536 | 1.511549406 | 0.672939833 | 1.141877841  | 0.672394512 | 1           | RNU6-315P    |
| ENSG00000063015 | 3.678887545 | 2.486316478 | 0.55620574   | 0.67245639  | 0.767959976 | SEZ6         |
| ENSG00000205808 | 164.0634356 | 178.2736901 | -0.120991247 | 0.672497682 | 0.767973376 | PLPP6        |
| ENSG00000227712 | 1.17296339  | 0.387220594 | 1.605730653  | 0.672550961 | 1           | AL359915.1   |
| ENSG00000229976 | 1.17296339  | 0.387220594 | 1.605730653  | 0.672550961 | 1           | AL118523.1   |
| ENSG00000201035 | 1.17296339  | 0.387220594 | 1.605730653  | 0.672550961 | 1           | RNA5SP469    |
| ENSG00000188636 | 768.2743251 | 821.1749534 | -0.095724663 | 0.672584569 | 0.76803884  | RTL6         |
| ENSG00000143224 | 375.1684073 | 349.1133332 | 0.104469299  | 0.672705199 | 0.768142829 | PPOX         |
| ENSG00000134575 | 613.3026922 | 665.0425739 | -0.117219464 | 0.672749585 | 0.76815975  | ACP2         |
| ENSG00000070367 | 1466.15962  | 1558.10033  | -0.08788523  | 0.672853188 | 0.768244284 | EXOC5        |
| ENSG00000178199 | 90.08212171 | 69.50102347 | 0.375841454  | 0.672918414 | 0.768284994 | ZC3H12D      |
| ENSG00000177225 | 2016.019683 | 1860.572851 | 0.115889835  | 0.672992365 | 0.768335661 | GATD1        |
| ENSG00000174705 | 1942.26499  | 1659.906464 | 0.226748324  | 0.673090548 | 0.768413988 | SH3PXD2B     |
| ENSG00000276934 | 1.50778846  | 0.672939833 | 1.138755055  | 0.673280587 | 1           | AC009704.2   |
| ENSG00000281016 | 3.593211803 | 5.33862858  | -0.57057073  | 0.673310741 | 0.768616709 | AC092574.2   |
| ENSG00000197620 | 232.9041025 | 251.5465396 | -0.112142267 | 0.673327289 | 0.768616709 | CXorf40A     |
| ENSG00000274605 | 57.69396718 | 68.11278789 | -0.242419825 | 0.673384458 | 0.768648196 | AL355338.1   |
| ENSG00000279236 | 2.06654734  | 1.10029862  | 0.922164667  | 0.67357055  | 0.768826836 | AC064801.2   |
| ENSG00000234534 | 0.61420451  | 1.682349583 | -1.464212143 | 0.673600637 | 1           | CSNK1G2P1    |
| ENSG00000278017 | 2.416487466 | 1.4981317   | 0.710884033  | 0.673840287 | 0.769100931 | AC064801.1   |
| ENSG00000265465 | 1.54052587  | 0.672939833 | 1.16735043   | 0.673841219 | 1           | MIR4768      |
| ENSG00000269300 | 4.443957882 | 2.52645467  | 0.817931169  | 0.674015014 | 0.769237974 | AC008734.1   |
| ENSG00000276337 | 2.755073482 | 3.893559308 | -0.509028056 | 0.674019571 | 0.769237974 | AC105429.1   |
| ENSG00000159348 | 886.9648357 | 949.410023  | -0.097981071 | 0.674062645 | 0.769253342 | CYB5R1       |
| ENSG00000158104 | 13.26542991 | 10.58037931 | 0.32161367   | 0.674168812 | 0.769340708 | HPD          |
| ENSG00000119547 | 2.153476731 | 3.291439249 | -0.612108464 | 0.674311197 | 0.769454067 | ONECUT2      |
| ENSG00000106665 | 2142.682982 | 2430.068222 | -0.18147297  | 0.674331887 | 0.769454067 | CLIP2        |
| ENSG00000271427 | 3.622188266 | 2.537067156 | 0.519482509  | 0.674356996 | 0.769454067 | AL358072.1   |
| ENSG00000271576 | 37.00632755 | 42.3236534  | -0.192130113 | 0.674455558 | 0.769532732 | AL359504.2   |
| ENSG00000239465 | 1.17296339  | 0.356539013 | 1.605681691  | 0.674517618 | 1           | AC090543.1   |
| ENSG00000225234 | 1.17296339  | 0.356539013 | 1.605681691  | 0.674517618 | 1           | TRAPPC12-AS1 |
| ENSG00000241413 | 1.17296339  | 0.356539013 | 1.605681691  | 0.674517618 | 1           | RN7SL441P    |
| ENSG00000241648 | 1.17296339  | 0.356539013 | 1.605681691  | 0.674517618 | 1           | CADM2-AS2    |
| ENSG00000218428 | 1.17296339  | 0.356539013 | 1.605681691  | 0.674517618 | 1           | NIP7P3       |
| ENSG00000287932 | 1.17296339  | 0.356539013 | 1.605681691  | 0.674517618 | 1           | AC000065.2   |
| ENSG00000230849 | 1.17296339  | 0.356539013 | 1.605681691  | 0.674517618 | 1           | GOT2P2       |
| ENSG00000225656 | 1.17296339  | 0.356539013 | 1.605681691  | 0.674517618 | 1           | AL118511.2   |
| ENSG00000242199 | 1.17296339  | 0.356539013 | 1.605681691  | 0.674517618 | 1           | AC022336.1   |
| ENSG00000287715 | 1.17296339  | 0.356539013 | 1.605681691  | 0.674517618 | 1           | AC026120.3   |
| ENSG00000287618 | 1.17296339  | 0.356539013 | 1.605681691  | 0.674517618 | 1           | AC025576.3   |
| ENSG00000285856 | 1.17296339  | 0.356539013 | 1.605681691  | 0.674517618 | 1           | AL353704.1   |
| ENSG00000229163 | 1.17296339  | 0.356539013 | 1.605681691  | 0.674517618 | 1           | NAP1L1P2     |
| ENSG00000227260 | 0.616711807 | 1.682349583 | -1.459288326 | 0.674611509 | 1           | LINC01985    |
| ENSG00000230021 | 10.10622432 | 6.93941751  | 0.547437982  | 0.674832248 | 0.769903048 | AL669831.3   |
| ENSG00000104613 | 1099.989523 | 1178.009175 | -0.098722397 | 0.674839387 | 0.769903048 | INTS10       |
| ENSG00000287935 | 6.724694577 | 5.084746798 | 0.405420076  | 0.67489036  | 0.769927393 | AC136297.1   |
| ENSG00000164162 | 119.5552774 | 107.7788312 | 0.14857323   | 0.675006795 | 0.770026413 | ANAPC10      |
| ENSG00000184160 | 99.16982309 | 139.111442  | -0.488924123 | 0.675039977 | 0.770030455 | ADRA2C       |

|                 |             |             |              |             |             |            |
|-----------------|-------------|-------------|--------------|-------------|-------------|------------|
| ENSG00000276527 | 2.71348926  | 1.823989131 | 0.583687668  | 0.675116441 | 0.770083868 | AL356515.1 |
| ENSG00000120727 | 998.0600191 | 915.1325886 | 0.125255669  | 0.675387912 | 0.770359704 | PAIP2      |
| ENSG00000260886 | 1.17296339  | 0.336469917 | 1.605652624  | 0.675693325 | 1           | TAT-AS1    |
| ENSG00000185933 | 1.17296339  | 0.336469917 | 1.605652624  | 0.675693325 | 1           | CALHM1     |
| ENSG00000276667 | 1.17296339  | 0.336469917 | 1.605652624  | 0.675693325 | 1           | AL158077.1 |
| ENSG00000234975 | 10.30279132 | 8.406867628 | 0.301685991  | 0.675705125 | 0.770687688 | FTH1P2     |
| ENSG00000286591 | 1.539272221 | 2.446178286 | -0.6844834   | 0.6758492   | 0.770818177 | AC006197.2 |
| ENSG00000259807 | 29.33901383 | 35.75853225 | -0.285880153 | 0.675885918 | 0.770824155 | AC009093.1 |
| ENSG00000087237 | 28.32680326 | 21.54053038 | 0.400970948  | 0.67592826  | 0.770824155 | CETP       |
| ENSG00000273759 | 13.89098853 | 11.44339761 | 0.278718493  | 0.675968308 | 0.770824155 | AL117379.1 |
| ENSG00000206601 | 1.54052587  | 2.731897526 | -0.841554494 | 0.675973117 | 0.770824155 | RNU6-431P  |
| ENSG00000237798 | 1.49643435  | 0.672939833 | 1.129222243  | 0.675984448 | 1           | AC010894.4 |
| ENSG00000124839 | 7.919041267 | 6.164976321 | 0.363795019  | 0.676116156 | 0.770953427 | RAB17      |
| ENSG00000255185 | 2.113146158 | 1.00940975  | 1.045697961  | 0.676147669 | 0.770955524 | PDXDC2P    |
| ENSG00000285781 | 2.75758078  | 3.973835692 | -0.529840254 | 0.67623513  | 0.770998334 | AL117340.1 |
| ENSG00000264745 | 2.947523532 | 4.616093944 | -0.642740387 | 0.676244565 | 0.770998334 | TTC39C-AS1 |
| ENSG00000238035 | 28.76310331 | 22.30577174 | 0.37072772   | 0.676403831 | 0.771146076 | AC138035.1 |
| novel.699       | 91.25118197 | 100.8558395 | -0.14463778  | 0.676535421 | 0.771262254 | -          |
| ENSG00000284605 | 1.493927053 | 0.672939833 | 1.127126958  | 0.676579784 | 1           | AC127526.3 |
| ENSG00000168056 | 5854.158072 | 5244.401938 | 0.158621719  | 0.676640239 | 0.771347903 | LTBP3      |
| ENSG00000240996 | 2.666890443 | 1.4981317   | 0.85004266   | 0.676771913 | 0.771464157 | AL157400.4 |
| ENSG00000280399 | 7.1700549   | 5.309102873 | 0.431460097  | 0.676904803 | 0.771581788 | AC022497.1 |
| ENSG00000105639 | 260.2445507 | 233.2514025 | 0.157065877  | 0.676999652 | 0.771656048 | JAK3       |
| ENSG00000270956 | 6.134451935 | 8.457618305 | -0.461251529 | 0.677035271 | 0.771662794 | AC009948.3 |
| ENSG00000228181 | 1.526664462 | 0.672939833 | 1.155799743  | 0.67704723  | 1           | AL590365.1 |
| ENSG00000260025 | 0.308355904 | 1.00940975  | -1.642211601 | 0.677178189 | 1           | CRIM1-DT   |
| ENSG00000134398 | 0.308355904 | 1.00940975  | -1.642211601 | 0.677178189 | 1           | ERN2       |
| ENSG00000228127 | 0.308355904 | 1.00940975  | -1.642211601 | 0.677178189 | 1           | LINC01649  |
| ENSG00000255565 | 0.308355904 | 1.00940975  | -1.642211601 | 0.677178189 | 1           | AC073651.1 |
| ENSG00000235090 | 0.308355904 | 1.00940975  | -1.642211601 | 0.677178189 | 1           | RPL7L1P3   |
| ENSG00000227730 | 0.308355904 | 1.00940975  | -1.642211601 | 0.677178189 | 1           | MTND6P5    |
| ENSG00000254444 | 0.308355904 | 1.00940975  | -1.642211601 | 0.677178189 | 1           | AC022762.1 |
| ENSG00000257042 | 0.308355904 | 1.00940975  | -1.642211601 | 0.677178189 | 1           | AC008011.2 |
| ENSG00000099937 | 19.32716987 | 25.82973941 | -0.417329088 | 0.67726199  | 0.771887339 | SERPIND1   |
| ENSG00000283635 | 0.307102255 | 1.00940975  | -1.6422059   | 0.677268671 | 1           | AC012485.3 |
| ENSG00000254101 | 0.307102255 | 1.00940975  | -1.6422059   | 0.677268671 | 1           | LINC02055  |
| ENSG00000127588 | 0.307102255 | 1.00940975  | -1.6422059   | 0.677268671 | 1           | GNG13      |
| ENSG00000244314 | 0.307102255 | 1.00940975  | -1.6422059   | 0.677268671 | 1           | RN7SL36P   |
| ENSG00000284062 | 0.307102255 | 1.00940975  | -1.6422059   | 0.677268671 | 1           | MIR4469    |
| ENSG00000152092 | 3.677633896 | 2.527610546 | 0.540384574  | 0.677326275 | 0.771926742 | ASTN1      |
| ENSG00000222047 | 16.38423366 | 20.81812414 | -0.340387672 | 0.677388676 | 0.771934361 | C10orf55   |
| ENSG00000116977 | 887.4792907 | 955.0166478 | -0.105467239 | 0.677413047 | 0.771934361 | LGALS8     |
| ENSG00000224066 | 3.978396636 | 2.51699806  | 0.658931592  | 0.677438568 | 0.771934361 | AL049795.1 |
| ENSG00000006282 | 1417.217717 | 1328.228208 | 0.09379337   | 0.677465296 | 0.771934361 | SPATA20    |
| ENSG00000283757 | 5.10350756  | 3.444975551 | 0.554760606  | 0.677490474 | 0.771934361 | AL031686.1 |
| ENSG00000273674 | 7.608178066 | 5.900482053 | 0.376899479  | 0.677511229 | 0.771934361 | AC021752.1 |
| ENSG00000270177 | 6.918398275 | 5.22882649  | 0.393207669  | 0.677592128 | 0.77199268  | AC104109.2 |
| ENSG00000155542 | 69.85169506 | 61.792991   | 0.173136405  | 0.677634273 | 0.772006842 | SETD9      |
| ENSG00000125772 | 1101.606962 | 1001.045442 | 0.13778473   | 0.677794354 | 0.772155358 | GPCPD1     |
| ENSG00000163806 | 16.03561845 | 13.44214802 | 0.248376182  | 0.677963019 | 0.772309968 | SPDYA      |
| ENSG00000227028 | 3.269740843 | 2.149846562 | 0.608816489  | 0.677989522 | 0.772309968 | SLC8A1-AS1 |

|                 |             |             |              |             |             |            |
|-----------------|-------------|-------------|--------------|-------------|-------------|------------|
| ENSG00000104371 | 0.293240848 | 1.00940975  | -1.642142704 | 0.678274061 | 1           | DKK4       |
| ENSG00000280394 | 0.293240848 | 1.00940975  | -1.642142704 | 0.678274061 | 1           | AC011471.3 |
| ENSG00000229696 | 0.293240848 | 1.00940975  | -1.642142704 | 0.678274061 | 1           | KARSP1     |
| ENSG00000265451 | 2.12199297  | 1.00940975  | 1.051618868  | 0.678299524 | 0.772582754 | AC012447.1 |
| ENSG00000101188 | 1.81990531  | 2.864080462 | -0.655474184 | 0.678309368 | 0.772582754 | NTSR1      |
| ENSG00000267244 | 41.94321349 | 35.63567753 | 0.238855482  | 0.678318202 | 0.772582754 | AC012615.6 |
| ENSG00000065613 | 1278.493998 | 1368.339461 | -0.098188201 | 0.678391048 | 0.772631852 | SLK        |
| ENSG00000105889 | 193.7340993 | 234.2696957 | -0.273208048 | 0.678435478 | 0.772648584 | STEAP1B    |
| ENSG00000229180 | 438.3141141 | 476.4344579 | -0.119999845 | 0.678701067 | 0.772917174 | AC006001.3 |
| ENSG00000123384 | 15377.39188 | 17474.54831 | -0.18444468  | 0.678825696 | 0.773006022 | LRP1       |
| novel.561       | 2.739958426 | 3.832196145 | -0.49849058  | 0.67883859  | 0.773006022 | -          |
| ENSG00000266445 | 0.879722543 | 1.874739808 | -1.074500046 | 0.678934274 | 0.773081096 | NARF-AS1   |
| ENSG00000271855 | 9.366369502 | 7.489631017 | 0.320112246  | 0.678993405 | 0.773114543 | AC073195.1 |
| ENSG00000224067 | 2.444210281 | 1.487519214 | 0.729354414  | 0.679041253 | 0.773135142 | AL354877.1 |
| ENSG00000277369 | 12.61221975 | 9.987715856 | 0.336543684  | 0.679087736 | 0.773154184 | AC010654.1 |
| ENSG00000145642 | 0.616711807 | 1.365948763 | -1.164328544 | 0.67911385  | 1           | SHISAL2B   |
| ENSG00000146677 | 198.537512  | 217.992539  | -0.134982293 | 0.679169903 | 0.773207383 | AC004453.1 |
| ENSG00000237819 | 3.072276198 | 4.73882027  | -0.625596013 | 0.67921812  | 0.773207383 | AC002454.1 |
| ENSG00000067646 | 258.7863974 | 112.730286  | 1.198749608  | 0.679223745 | 0.773207383 | ZFY        |
| ENSG00000157557 | 1612.92334  | 1822.072644 | -0.175770616 | 0.67934781  | 0.773314732 | ETS2       |
| ENSG00000116497 | 653.547906  | 607.9741818 | 0.104613878  | 0.679395224 | 0.773334822 | S100PBP    |
| ENSG00000186026 | 48.23411531 | 42.42155873 | 0.189363932  | 0.679430243 | 0.773340802 | ZNF284     |
| ENSG00000169155 | 299.089419  | 278.3948414 | 0.103853937  | 0.679519385 | 0.773376457 | ZBTB43     |
| ENSG00000247137 | 33.61649263 | 39.32764679 | -0.227252601 | 0.679541734 | 0.773376457 | AP000873.2 |
| ENSG00000145337 | 1304.919267 | 1217.692954 | 0.099572919  | 0.679563221 | 0.773376457 | PYURF      |
| ENSG00000133789 | 1374.501454 | 1272.817815 | 0.11069136   | 0.679594678 | 0.773376457 | SWAP70     |
| ENSG00000236008 | 2.094270155 | 1.00940975  | 1.034093632  | 0.679610404 | 0.773376457 | LINC01814  |
| ENSG00000172380 | 3514.140614 | 3713.954841 | -0.079815606 | 0.679678481 | 0.773402354 | GNG12      |
| ENSG00000271040 | 3.940644631 | 5.248895586 | -0.424235754 | 0.679692696 | 0.773402354 | AL390955.2 |
| ENSG00000270277 | 4.527126326 | 6.247564456 | -0.456566711 | 0.679749694 | 0.773433337 | AC009948.2 |
| ENSG00000135632 | 463.6305254 | 502.0567123 | -0.115229411 | 0.679881912 | 0.773523921 | SMYD5      |
| ENSG00000228327 | 58.38239457 | 71.4769263  | -0.29057843  | 0.679888852 | 0.773523921 | AL669831.1 |
| ENSG00000173273 | 45.77855092 | 50.78970083 | -0.149138637 | 0.680022758 | 0.773590954 | TNKS       |
| ENSG00000180815 | 2.416487466 | 1.518200796 | 0.697180815  | 0.680037097 | 0.773590954 | MAP3K15    |
| ENSG00000116039 | 2.416487466 | 1.518200796 | 0.697180815  | 0.680037097 | 0.773590954 | ATP6V1B1   |
| ENSG00000235316 | 44.85946672 | 39.65324743 | 0.180442676  | 0.680112711 | 0.773638367 | DUSP8P5    |
| ENSG00000165233 | 855.30483   | 950.3655531 | -0.151739541 | 0.680138329 | 0.773638367 | CARD19     |
| ENSG00000198231 | 2704.605763 | 2852.503669 | -0.076768271 | 0.680506438 | 0.774002835 | DDX42      |
| ENSG00000167904 | 349.5122123 | 371.0374066 | -0.086509716 | 0.680518331 | 0.774002835 | TMEM68     |
| ENSG00000167548 | 1727.879427 | 1894.592018 | -0.132794479 | 0.680594903 | 0.77405604  | KMT2D      |
| ENSG00000250461 | 32.22837097 | 27.75078197 | 0.214416757  | 0.680672744 | 0.774090383 | AC122718.1 |
| ENSG00000167202 | 1218.915558 | 1365.483878 | -0.163847501 | 0.680684688 | 0.774090383 | TBC1D2B    |
| ENSG00000253966 | 3.29495636  | 2.10970837  | 0.637573802  | 0.680787292 | 0.77417318  | AC008514.2 |
| ENSG00000175938 | 254.6771628 | 287.8973373 | -0.176497933 | 0.68093168  | 0.774303483 | ORAI3      |
| ENSG00000156976 | 7259.129541 | 7676.136518 | -0.080571232 | 0.681080317 | 0.774438606 | EIF4A2     |
| ENSG00000198521 | 59.11042457 | 53.00450658 | 0.157565784  | 0.681144824 | 0.77447806  | ZNF43      |
| ENSG00000272263 | 3.310071416 | 4.801467703 | -0.546570389 | 0.681340467 | 0.774666609 | AC034198.2 |
| ENSG00000248333 | 913.1052277 | 970.4754104 | -0.087839858 | 0.681376408 | 0.774673571 | CDK11B     |
| ENSG00000176700 | 41.0662117  | 36.04412309 | 0.192585493  | 0.681576047 | 0.774866637 | SCAND2P    |
| ENSG00000225806 | 5.965607749 | 7.970052231 | -0.410698372 | 0.68166658  | 0.774935653 | AL121917.1 |
| ENSG00000145428 | 107.9324887 | 134.3438882 | -0.314791292 | 0.681750816 | 0.774997504 | RNF175     |

|                 |             |             |              |             |             |            |
|-----------------|-------------|-------------|--------------|-------------|-------------|------------|
| ENSG00000279700 | 3.657504245 | 5.421216714 | -0.567991678 | 0.681878207 | 0.775108405 | AC131212.2 |
| ENSG00000260536 | 2.66939774  | 1.518200796 | 0.835779866  | 0.682046613 | 0.775265916 | AL035071.2 |
| ENSG00000220842 | 955.914397  | 853.1653765 | 0.164110951  | 0.682103796 | 0.775296996 | RPL21P16   |
| ENSG00000227073 | 1.539272221 | 0.713078025 | 1.103749864  | 0.682152474 | 1           | SDHDP2     |
| ENSG00000230001 | 1.539272221 | 0.713078025 | 1.103749864  | 0.682152474 | 1           | AL359095.1 |
| ENSG00000155100 | 288.3983223 | 316.1830281 | -0.133626564 | 0.682271284 | 0.775453442 | OTUD6B     |
| ENSG00000267741 | 4.839243176 | 3.188782018 | 0.597377628  | 0.682317115 | 0.775471609 | UBE2L4     |
| ENSG00000118855 | 1301.313746 | 1223.738949 | 0.088559882  | 0.682409704 | 0.775539145 | MFSD1      |
| ENSG00000234707 | 3.579350395 | 2.120320855 | 0.75364292   | 0.682442382 | 0.775539145 | AC074351.1 |
| ENSG00000168229 | 32.93132799 | 23.61536603 | 0.476817806  | 0.68246609  | 0.775539145 | PTGDR      |
| ENSG00000172493 | 1030.451052 | 1138.031654 | -0.143096587 | 0.682537373 | 0.775586227 | AFF1       |
| ENSG00000119801 | 1403.155219 | 1283.70621  | 0.128582479  | 0.682709639 | 0.775748049 | YPEL5      |
| ENSG00000157514 | 1245.892417 | 1085.908548 | 0.198160621  | 0.683008376 | 0.776053556 | TSC22D3    |
| ENSG00000271537 | 2.699627853 | 3.964379082 | -0.549649336 | 0.683080236 | 0.776101264 | AC009220.3 |
| ENSG00000207231 | 2.067800989 | 1.130980201 | 0.893613216  | 0.68325841  | 0.776269755 | RF00019    |
| ENSG00000266490 | 14.76061061 | 12.39131581 | 0.260301049  | 0.683500633 | 0.77650597  | AC127024.5 |
| ENSG00000170190 | 162.4647155 | 145.6818973 | 0.158945456  | 0.683526097 | 0.77650597  | SLC16A5    |
| ENSG00000081052 | 411.9192144 | 323.9818332 | 0.346039105  | 0.683596201 | 0.776551655 | COL4A4     |
| ENSG00000272843 | 3.969621095 | 2.853467977 | 0.469789958  | 0.683719161 | 0.776657377 | AC211476.2 |
| ENSG00000005175 | 416.2087753 | 454.4129924 | -0.127181292 | 0.683841544 | 0.776762434 | RPAP3      |
| ENSG00000160284 | 1.817398012 | 1.130980201 | 0.712147665  | 0.684014192 | 0.776924575 | SPATC1L    |
| ENSG00000127511 | 1868.613564 | 1716.088713 | 0.122991879  | 0.684254419 | 0.777163456 | SIN3B      |
| ENSG00000233896 | 0.923814062 | 0.387220594 | 1.25388688   | 0.684301487 | 1           | PDYN-AS1   |
| ENSG00000243296 | 0.923814062 | 0.387220594 | 1.25388688   | 0.684301487 | 1           | AC078828.1 |
| ENSG00000287608 | 3.915429114 | 5.827350529 | -0.569978147 | 0.684335615 | 0.777221701 | AC022137.4 |
| ENSG00000279155 | 7.165040305 | 9.284094441 | -0.371048226 | 0.68440822  | 0.777249213 | AC233300.1 |
| ENSG00000131732 | 559.7926783 | 521.6501293 | 0.102045703  | 0.684419672 | 0.777249213 | ZCCHC9     |
| ENSG00000267388 | 1.493927053 | 2.587817834 | -0.781747833 | 0.684467201 | 0.777269214 | AF038458.2 |
| ENSG00000200924 | 2.373649595 | 3.61729668  | -0.598872687 | 0.684546452 | 0.777311391 | RNU6-1048P |
| ENSG00000272370 | 4.571217846 | 3.342189926 | 0.465526589  | 0.684564179 | 0.777311391 | AC092354.2 |
| ENSG00000163374 | 605.2598831 | 566.6149669 | 0.095537623  | 0.684640312 | 0.777363865 | YY1AP1     |
| ENSG00000279464 | 6.932259683 | 8.702043477 | -0.322279732 | 0.684686234 | 0.777369007 | AC096720.2 |
| ENSG00000168748 | 1.229662669 | 2.200597239 | -0.839731012 | 0.684730471 | 0.777369007 | CA7        |
| ENSG00000184357 | 0.922560414 | 0.387220594 | 1.252233631  | 0.684735928 | 1           | HIST1H1B   |
| ENSG00000253869 | 0.922560414 | 0.387220594 | 1.252233631  | 0.684735928 | 1           | PIGFP1     |
| ENSG00000274892 | 0.922560414 | 0.387220594 | 1.252233631  | 0.684735928 | 1           | AC011487.4 |
| ENSG00000286743 | 0.922560414 | 0.387220594 | 1.252233631  | 0.684735928 | 1           | AC127540.2 |
| ENSG00000271414 | 0.922560414 | 0.387220594 | 1.252233631  | 0.684735928 | 1           | AC093107.2 |
| ENSG00000267101 | 0.922560414 | 0.387220594 | 1.252233631  | 0.684735928 | 1           | AC090376.1 |
| ENSG00000267480 | 7.809474928 | 5.921835419 | 0.389946571  | 0.684758289 | 0.777369007 | AP001542.3 |
| ENSG00000262434 | 2.391271949 | 3.954922472 | -0.722342922 | 0.684764523 | 0.777369007 | AC087392.4 |
| ENSG00000260352 | 2.458071688 | 1.467450118 | 0.74980603   | 0.684813919 | 0.777391114 | AC092287.1 |
| ENSG00000133195 | 206.3373847 | 180.1042761 | 0.194871535  | 0.68487954  | 0.777431638 | SLC39A11   |
| ENSG00000187187 | 3.05966844  | 4.33153058  | -0.503308827 | 0.685097226 | 0.777638011 | ZNF546     |
| ENSG00000263063 | 5.074531097 | 3.647978261 | 0.486185452  | 0.685121207 | 0.777638011 | AC024361.2 |
| ENSG00000250790 | 10.8476888  | 8.856735655 | 0.288271376  | 0.685360364 | 0.777823009 | AC127070.2 |
| ENSG00000157045 | 51.78280832 | 61.66273463 | -0.251452145 | 0.685362066 | 0.777823009 | NTAN1      |
| ENSG00000270429 | 2.34592678  | 1.130980201 | 1.069070691  | 0.68537401  | 0.777823009 | KNOP1P2    |
| ENSG00000018510 | 1075.431122 | 1201.610717 | -0.160200991 | 0.685438444 | 0.777823321 | AGPS       |
| ENSG00000286659 | 2.082916045 | 1.00940975  | 1.027472669  | 0.685445077 | 0.777823321 | Z99716.2   |
| ENSG00000176728 | 44.90814556 | 22.23178831 | 1.013635771  | 0.685468616 | 0.777823321 | TTY14      |

|                 |             |             |             |             |             |            |
|-----------------|-------------|-------------|-------------|-------------|-------------|------------|
| ENSG00000228150 | 3.016830569 | 4.554730781 | -0.59911019 | 0.685494037 | 0.777823321 | AL357140.2 |
| ENSG00000236670 | 4.272962403 | 2.934900236 | 0.548442747 | 0.685736131 | 0.778064042 | KRT18P5    |
| novel.963       | 0.616711807 | 0           | 1.63305933  | 0.685736259 | 1           | -          |
| ENSG00000204711 | 0.616711807 | 0           | 1.63305933  | 0.685736259 | 1           | C9orf135   |
| ENSG00000237137 | 0.616711807 | 0           | 1.63305933  | 0.685736259 | 1           | AL159169.1 |
| ENSG00000233633 | 0.616711807 | 0           | 1.63305933  | 0.685736259 | 1           | AC093326.1 |
| novel.263       | 0.616711807 | 0           | 1.63305933  | 0.685736259 | 1           | -          |
| ENSG00000160870 | 0.616711807 | 0           | 1.63305933  | 0.685736259 | 1           | CYP3A7     |
| ENSG00000105492 | 0.616711807 | 0           | 1.63305933  | 0.685736259 | 1           | SIGLEC6    |
| ENSG00000225559 | 0.616711807 | 0           | 1.63305933  | 0.685736259 | 1           | AC083867.1 |
| ENSG00000198787 | 0.616711807 | 0           | 1.63305933  | 0.685736259 | 1           | OR4D12P    |
| ENSG00000211892 | 0.616711807 | 0           | 1.63305933  | 0.685736259 | 1           | IGHG4      |
| ENSG00000184709 | 0.616711807 | 0           | 1.63305933  | 0.685736259 | 1           | LRRC26     |
| ENSG00000144481 | 0.616711807 | 0           | 1.63305933  | 0.685736259 | 1           | TRPM8      |
| ENSG00000102313 | 0.616711807 | 0           | 1.63305933  | 0.685736259 | 1           | ITIH6      |
| ENSG00000269944 | 0.616711807 | 0           | 1.63305933  | 0.685736259 | 1           | AP001267.4 |
| ENSG00000279208 | 0.616711807 | 0           | 1.63305933  | 0.685736259 | 1           | CR381653.2 |
| novel.573       | 0.616711807 | 0           | 1.63305933  | 0.685736259 | 1           | -          |
| ENSG00000116147 | 0.616711807 | 0           | 1.63305933  | 0.685736259 | 1           | TNR        |
| ENSG00000228970 | 0.616711807 | 0           | 1.63305933  | 0.685736259 | 1           | UBTFL6     |
| ENSG00000225639 | 0.616711807 | 0           | 1.63305933  | 0.685736259 | 1           | PGAM1P2    |
| ENSG00000211809 | 0.616711807 | 0           | 1.63305933  | 0.685736259 | 1           | TRAV27     |
| ENSG00000100448 | 0.616711807 | 0           | 1.63305933  | 0.685736259 | 1           | CTSG       |
| ENSG00000225903 | 0.616711807 | 0           | 1.63305933  | 0.685736259 | 1           | AL035404.2 |
| ENSG00000244268 | 0.616711807 | 0           | 1.63305933  | 0.685736259 | 1           | AC117394.2 |
| ENSG00000252615 | 0.616711807 | 0           | 1.63305933  | 0.685736259 | 1           | RF00019    |
| ENSG00000236908 | 0.616711807 | 0           | 1.63305933  | 0.685736259 | 1           | AC005865.1 |
| ENSG00000283422 | 0.616711807 | 0           | 1.63305933  | 0.685736259 | 1           | LINC02452  |
| ENSG00000234003 | 0.616711807 | 0           | 1.63305933  | 0.685736259 | 1           | MTATP6P27  |
| ENSG00000229757 | 0.616711807 | 0           | 1.63305933  | 0.685736259 | 1           | AL031736.2 |
| ENSG00000250422 | 0.616711807 | 0           | 1.63305933  | 0.685736259 | 1           | AC117529.2 |
| ENSG00000260418 | 0.616711807 | 0           | 1.63305933  | 0.685736259 | 1           | AL023284.4 |
| ENSG00000287969 | 0.616711807 | 0           | 1.63305933  | 0.685736259 | 1           | AL355474.1 |
| ENSG00000211937 | 0.616711807 | 0           | 1.63305933  | 0.685736259 | 1           | IGHV2-5    |
| ENSG00000267195 | 0.616711807 | 0           | 1.63305933  | 0.685736259 | 1           | MIR212     |
| ENSG00000204577 | 0.616711807 | 0           | 1.63305933  | 0.685736259 | 1           | LILRB3     |
| ENSG00000115850 | 0.616711807 | 0           | 1.63305933  | 0.685736259 | 1           | LCT        |
| ENSG00000180697 | 0.616711807 | 0           | 1.63305933  | 0.685736259 | 1           | C3orf22    |
| ENSG00000285578 | 0.616711807 | 0           | 1.63305933  | 0.685736259 | 1           | AL035696.4 |
| ENSG00000217004 | 0.616711807 | 0           | 1.63305933  | 0.685736259 | 1           | Z97832.1   |
| ENSG00000223504 | 0.616711807 | 0           | 1.63305933  | 0.685736259 | 1           | AL646090.1 |
| ENSG00000285772 | 0.616711807 | 0           | 1.63305933  | 0.685736259 | 1           | AC000120.2 |
| ENSG00000282780 | 0.616711807 | 0           | 1.63305933  | 0.685736259 | 1           | TRBJ1-6    |
| ENSG00000286031 | 0.616711807 | 0           | 1.63305933  | 0.685736259 | 1           | AC232271.2 |
| ENSG00000200525 | 0.616711807 | 0           | 1.63305933  | 0.685736259 | 1           | RNU6-1209P |
| ENSG00000275995 | 0.616711807 | 0           | 1.63305933  | 0.685736259 | 1           | AC109809.1 |
| ENSG00000259538 | 0.616711807 | 0           | 1.63305933  | 0.685736259 | 1           | UBE2Q2P11  |
| ENSG00000260362 | 0.616711807 | 0           | 1.63305933  | 0.685736259 | 1           | AC007218.1 |
| ENSG00000211563 | 0.616711807 | 0           | 1.63305933  | 0.685736259 | 1           | MIR3065    |
| ENSG00000217327 | 0.616711807 | 0           | 1.63305933  | 0.685736259 | 1           | RPS7P5     |
| ENSG00000241532 | 0.616711807 | 0           | 1.63305933  | 0.685736259 | 1           | AGGF1P3    |

|                 |             |   |            |             |   |               |
|-----------------|-------------|---|------------|-------------|---|---------------|
| ENSG00000241490 | 0.616711807 | 0 | 1.63305933 | 0.685736259 | 1 | AC093010.2    |
| ENSG00000253852 | 0.616711807 | 0 | 1.63305933 | 0.685736259 | 1 | AC011383.1    |
| ENSG00000270326 | 0.616711807 | 0 | 1.63305933 | 0.685736259 | 1 | AL021997.1    |
| ENSG00000287914 | 0.616711807 | 0 | 1.63305933 | 0.685736259 | 1 | AL078582.2    |
| ENSG00000233208 | 0.616711807 | 0 | 1.63305933 | 0.685736259 | 1 | LINC00642     |
| ENSG00000258979 | 0.616711807 | 0 | 1.63305933 | 0.685736259 | 1 | LINC02299     |
| ENSG00000279537 | 0.616711807 | 0 | 1.63305933 | 0.685736259 | 1 | AC020658.7    |
| ENSG00000285866 | 0.616711807 | 0 | 1.63305933 | 0.685736259 | 1 | AC009432.2    |
| ENSG00000266106 | 0.616711807 | 0 | 1.63305933 | 0.685736259 | 1 | AC103809.1    |
| ENSG00000267679 | 0.616711807 | 0 | 1.63305933 | 0.685736259 | 1 | EIF5AP2       |
| ENSG00000235299 | 0.616711807 | 0 | 1.63305933 | 0.685736259 | 1 | MRPL53P1      |
| ENSG00000229531 | 0.616711807 | 0 | 1.63305933 | 0.685736259 | 1 | Z99127.1      |
| ENSG00000237751 | 0.616711807 | 0 | 1.63305933 | 0.685736259 | 1 | LINC01143     |
| ENSG00000234896 | 0.616711807 | 0 | 1.63305933 | 0.685736259 | 1 | OR7E62P       |
| ENSG00000230395 | 0.616711807 | 0 | 1.63305933 | 0.685736259 | 1 | AC092651.1    |
| ENSG00000178055 | 0.616711807 | 0 | 1.63305933 | 0.685736259 | 1 | PRSS42P       |
| ENSG00000036828 | 0.616711807 | 0 | 1.63305933 | 0.685736259 | 1 | CASR          |
| ENSG00000238097 | 0.616711807 | 0 | 1.63305933 | 0.685736259 | 1 | LINC02037     |
| ENSG00000251399 | 0.616711807 | 0 | 1.63305933 | 0.685736259 | 1 | AC092542.1    |
| ENSG00000249516 | 0.616711807 | 0 | 1.63305933 | 0.685736259 | 1 | PRELID3BP6    |
| ENSG00000250787 | 0.616711807 | 0 | 1.63305933 | 0.685736259 | 1 | HMG1P17       |
| ENSG00000232578 | 0.616711807 | 0 | 1.63305933 | 0.685736259 | 1 | AC093311.1    |
| ENSG00000178172 | 0.616711807 | 0 | 1.63305933 | 0.685736259 | 1 | SPINK6        |
| ENSG00000223486 | 0.616711807 | 0 | 1.63305933 | 0.685736259 | 1 | AC092198.1    |
| ENSG00000287070 | 0.616711807 | 0 | 1.63305933 | 0.685736259 | 1 | AL499604.1    |
| ENSG00000227512 | 0.616711807 | 0 | 1.63305933 | 0.685736259 | 1 | AL592301.1    |
| ENSG00000257002 | 0.616711807 | 0 | 1.63305933 | 0.685736259 | 1 | AP000438.1    |
| ENSG00000183463 | 0.616711807 | 0 | 1.63305933 | 0.685736259 | 1 | URAD          |
| ENSG00000229249 | 0.616711807 | 0 | 1.63305933 | 0.685736259 | 1 | LINC00446     |
| ENSG00000199082 | 0.616711807 | 0 | 1.63305933 | 0.685736259 | 1 | MIR342        |
| ENSG00000259336 | 0.616711807 | 0 | 1.63305933 | 0.685736259 | 1 | AC021231.1    |
| ENSG00000213599 | 0.616711807 | 0 | 1.63305933 | 0.685736259 | 1 | SLX1A-SULT1A3 |
| ENSG00000286065 | 0.616711807 | 0 | 1.63305933 | 0.685736259 | 1 | AC015911.11   |
| ENSG00000285940 | 0.616711807 | 0 | 1.63305933 | 0.685736259 | 1 | AC009899.1    |
| ENSG00000233214 | 0.616711807 | 0 | 1.63305933 | 0.685736259 | 1 | AC002511.2    |
| ENSG00000179213 | 0.616711807 | 0 | 1.63305933 | 0.685736259 | 1 | SIGLECL1      |
| ENSG00000278932 | 0.616711807 | 0 | 1.63305933 | 0.685736259 | 1 | CR381653.1    |
| ENSG00000232560 | 0.616711807 | 0 | 1.63305933 | 0.685736259 | 1 | LINC01549     |
| ENSG00000236601 | 0.616711807 | 0 | 1.63305933 | 0.685736259 | 1 | AL732372.1    |
| ENSG00000230718 | 0.616711807 | 0 | 1.63305933 | 0.685736259 | 1 | AC114878.1    |
| ENSG00000228863 | 0.616711807 | 0 | 1.63305933 | 0.685736259 | 1 | AL121985.1    |
| ENSG00000234389 | 0.616711807 | 0 | 1.63305933 | 0.685736259 | 1 | AC007278.1    |
| ENSG00000287036 | 0.616711807 | 0 | 1.63305933 | 0.685736259 | 1 | AC018802.1    |
| ENSG00000222033 | 0.616711807 | 0 | 1.63305933 | 0.685736259 | 1 | LINC01124     |
| ENSG00000280571 | 0.616711807 | 0 | 1.63305933 | 0.685736259 | 1 | AC006059.2    |
| ENSG00000214820 | 0.616711807 | 0 | 1.63305933 | 0.685736259 | 1 | MPRIPP1       |
| ENSG00000285780 | 0.616711807 | 0 | 1.63305933 | 0.685736259 | 1 | AC109129.1    |
| ENSG00000287331 | 0.616711807 | 0 | 1.63305933 | 0.685736259 | 1 | AC106045.1    |
| ENSG00000128045 | 0.616711807 | 0 | 1.63305933 | 0.685736259 | 1 | RASL11B       |
| ENSG00000250945 | 0.616711807 | 0 | 1.63305933 | 0.685736259 | 1 | AC096773.1    |
| ENSG00000274553 | 0.616711807 | 0 | 1.63305933 | 0.685736259 | 1 | AC138035.3    |

|                 |             |   |            |             |   |            |
|-----------------|-------------|---|------------|-------------|---|------------|
| ENSG00000286573 | 0.616711807 | 0 | 1.63305933 | 0.685736259 | 1 | AL136225.1 |
| ENSG00000287189 | 0.616711807 | 0 | 1.63305933 | 0.685736259 | 1 | AL121956.6 |
| ENSG00000136574 | 0.616711807 | 0 | 1.63305933 | 0.685736259 | 1 | GATA4      |
| ENSG00000223602 | 0.616711807 | 0 | 1.63305933 | 0.685736259 | 1 | AC125634.1 |
| ENSG00000234692 | 0.616711807 | 0 | 1.63305933 | 0.685736259 | 1 | AL355601.1 |
| ENSG00000119440 | 0.616711807 | 0 | 1.63305933 | 0.685736259 | 1 | LCN1P1     |
| ENSG00000206638 | 0.616711807 | 0 | 1.63305933 | 0.685736259 | 1 | RNU6-672P  |
| ENSG00000227515 | 0.616711807 | 0 | 1.63305933 | 0.685736259 | 1 | C1DP4      |
| ENSG00000205846 | 0.616711807 | 0 | 1.63305933 | 0.685736259 | 1 | CLEC6A     |
| ENSG00000247213 | 0.616711807 | 0 | 1.63305933 | 0.685736259 | 1 | LINC01498  |
| ENSG00000199899 | 0.616711807 | 0 | 1.63305933 | 0.685736259 | 1 | RF00019    |
| ENSG00000223625 | 0.616711807 | 0 | 1.63305933 | 0.685736259 | 1 | CYCSP32    |
| ENSG00000237637 | 0.616711807 | 0 | 1.63305933 | 0.685736259 | 1 | FRY-AS1    |
| ENSG00000232487 | 0.616711807 | 0 | 1.63305933 | 0.685736259 | 1 | RASA3-IT1  |
| ENSG00000228294 | 0.616711807 | 0 | 1.63305933 | 0.685736259 | 1 | BMS1P17    |
| ENSG00000251858 | 0.616711807 | 0 | 1.63305933 | 0.685736259 | 1 | RF00322    |
| ENSG00000201500 | 0.616711807 | 0 | 1.63305933 | 0.685736259 | 1 | RF00181    |
| ENSG00000285012 | 0.616711807 | 0 | 1.63305933 | 0.685736259 | 1 | AC092723.3 |
| ENSG00000261915 | 0.616711807 | 0 | 1.63305933 | 0.685736259 | 1 | AC026954.2 |
| ENSG00000179673 | 0.616711807 | 0 | 1.63305933 | 0.685736259 | 1 | RPRML      |
| ENSG00000154975 | 0.616711807 | 0 | 1.63305933 | 0.685736259 | 1 | CA10       |
| ENSG00000234900 | 0.616711807 | 0 | 1.63305933 | 0.685736259 | 1 | AL135937.1 |
| ENSG00000199683 | 0.616711807 | 0 | 1.63305933 | 0.685736259 | 1 | RN7SKP185  |
| ENSG00000267509 | 0.616711807 | 0 | 1.63305933 | 0.685736259 | 1 | AC010511.1 |
| ENSG00000267636 | 0.616711807 | 0 | 1.63305933 | 0.685736259 | 1 | AC008992.1 |
| ENSG00000276400 | 0.616711807 | 0 | 1.63305933 | 0.685736259 | 1 | VN1R9P     |
| ENSG00000277856 | 0.616711807 | 0 | 1.63305933 | 0.685736259 | 1 | AC233755.2 |
| novel.451       | 0.616711807 | 0 | 1.63305933 | 0.685736259 | 1 | -          |
| ENSG00000233234 | 0.616711807 | 0 | 1.63305933 | 0.685736259 | 1 | AL592464.2 |
| ENSG00000221808 | 0.616711807 | 0 | 1.63305933 | 0.685736259 | 1 | MIR1256    |
| ENSG00000197587 | 0.616711807 | 0 | 1.63305933 | 0.685736259 | 1 | DMBX1      |
| ENSG00000238145 | 0.616711807 | 0 | 1.63305933 | 0.685736259 | 1 | AL731892.1 |
| ENSG00000225183 | 0.616711807 | 0 | 1.63305933 | 0.685736259 | 1 | AL353898.1 |
| ENSG00000285407 | 0.616711807 | 0 | 1.63305933 | 0.685736259 | 1 | AL033530.1 |
| ENSG00000180869 | 0.616711807 | 0 | 1.63305933 | 0.685736259 | 1 | LINC01555  |
| ENSG00000284637 | 0.616711807 | 0 | 1.63305933 | 0.685736259 | 1 | AC099063.3 |
| ENSG00000234283 | 0.616711807 | 0 | 1.63305933 | 0.685736259 | 1 | LINC01731  |
| ENSG00000275207 | 0.616711807 | 0 | 1.63305933 | 0.685736259 | 1 | MIR6740    |
| ENSG00000226780 | 0.616711807 | 0 | 1.63305933 | 0.685736259 | 1 | AC244035.1 |
| ENSG00000282564 | 0.616711807 | 0 | 1.63305933 | 0.685736259 | 1 | AL133516.1 |
| ENSG00000252290 | 0.616711807 | 0 | 1.63305933 | 0.685736259 | 1 | RF00402    |
| ENSG00000232057 | 0.616711807 | 0 | 1.63305933 | 0.685736259 | 1 | AC093390.1 |
| ENSG00000232718 | 0.616711807 | 0 | 1.63305933 | 0.685736259 | 1 | GAPDHP48   |
| ENSG00000202430 | 0.616711807 | 0 | 1.63305933 | 0.685736259 | 1 | RNA5SP88   |
| ENSG00000230286 | 0.616711807 | 0 | 1.63305933 | 0.685736259 | 1 | AC013472.2 |
| ENSG00000277764 | 0.616711807 | 0 | 1.63305933 | 0.685736259 | 1 | RF02272    |
| ENSG00000211593 | 0.616711807 | 0 | 1.63305933 | 0.685736259 | 1 | IGKJ5      |
| ENSG00000251546 | 0.616711807 | 0 | 1.63305933 | 0.685736259 | 1 | IGKV1D-39  |
| ENSG00000233037 | 0.616711807 | 0 | 1.63305933 | 0.685736259 | 1 | AC009237.5 |
| ENSG00000236525 | 0.616711807 | 0 | 1.63305933 | 0.685736259 | 1 | AC007278.2 |
| ENSG00000231013 | 0.616711807 | 0 | 1.63305933 | 0.685736259 | 1 | AC013275.1 |



|                 |             |   |            |             |   |            |
|-----------------|-------------|---|------------|-------------|---|------------|
| ENSG00000227745 | 0.616711807 | 0 | 1.63305933 | 0.685736259 | 1 | AC098826.2 |
| ENSG00000213981 | 0.616711807 | 0 | 1.63305933 | 0.685736259 | 1 | AC007277.1 |
| ENSG00000260171 | 0.616711807 | 0 | 1.63305933 | 0.685736259 | 1 | AC008269.2 |
| ENSG00000227430 | 0.616711807 | 0 | 1.63305933 | 0.685736259 | 1 | AC019185.1 |
| ENSG00000283428 | 0.616711807 | 0 | 1.63305933 | 0.685736259 | 1 | CCDC195    |
| ENSG00000288082 | 0.616711807 | 0 | 1.63305933 | 0.685736259 | 1 | AC023787.3 |
| ENSG00000172478 | 0.616711807 | 0 | 1.63305933 | 0.685736259 | 1 | MAB21L4    |
| ENSG00000188389 | 0.616711807 | 0 | 1.63305933 | 0.685736259 | 1 | PDCD1      |
| ENSG00000226567 | 0.616711807 | 0 | 1.63305933 | 0.685736259 | 1 | LINC00606  |
| ENSG00000224752 | 0.616711807 | 0 | 1.63305933 | 0.685736259 | 1 | VN1R21P    |
| ENSG00000206552 | 0.616711807 | 0 | 1.63305933 | 0.685736259 | 1 | KRBOX1-AS1 |
| ENSG00000223916 | 0.616711807 | 0 | 1.63305933 | 0.685736259 | 1 | AC097638.1 |
| ENSG00000233509 | 0.616711807 | 0 | 1.63305933 | 0.685736259 | 1 | ZNF197-AS1 |
| ENSG00000232407 | 0.616711807 | 0 | 1.63305933 | 0.685736259 | 1 | PPIAP70    |
| ENSG00000228980 | 0.616711807 | 0 | 1.63305933 | 0.685736259 | 1 | LINC01205  |
| ENSG00000242613 | 0.616711807 | 0 | 1.63305933 | 0.685736259 | 1 | AC063952.3 |
| ENSG00000242222 | 0.616711807 | 0 | 1.63305933 | 0.685736259 | 1 | AC092989.1 |
| ENSG00000249290 | 0.616711807 | 0 | 1.63305933 | 0.685736259 | 1 | AC010181.1 |
| ENSG00000244468 | 0.616711807 | 0 | 1.63305933 | 0.685736259 | 1 | AC093001.1 |
| ENSG00000174948 | 0.616711807 | 0 | 1.63305933 | 0.685736259 | 1 | GPR149     |
| ENSG00000250681 | 0.616711807 | 0 | 1.63305933 | 0.685736259 | 1 | AL121796.1 |
| ENSG00000287383 | 0.616711807 | 0 | 1.63305933 | 0.685736259 | 1 | AC110809.1 |
| ENSG00000171195 | 0.616711807 | 0 | 1.63305933 | 0.685736259 | 1 | MUC7       |
| ENSG00000241981 | 0.616711807 | 0 | 1.63305933 | 0.685736259 | 1 | AF213884.1 |
| ENSG00000199169 | 0.616711807 | 0 | 1.63305933 | 0.685736259 | 1 | MIR367     |
| ENSG00000248521 | 0.616711807 | 0 | 1.63305933 | 0.685736259 | 1 | AC092612.1 |
| ENSG00000251504 | 0.616711807 | 0 | 1.63305933 | 0.685736259 | 1 | LINC01099  |
| ENSG00000287183 | 0.616711807 | 0 | 1.63305933 | 0.685736259 | 1 | AC093824.2 |
| ENSG00000201370 | 0.616711807 | 0 | 1.63305933 | 0.685736259 | 1 | RF00019    |
| ENSG00000248969 | 0.616711807 | 0 | 1.63305933 | 0.685736259 | 1 | AC137810.1 |
| ENSG00000287179 | 0.616711807 | 0 | 1.63305933 | 0.685736259 | 1 | AC008558.1 |
| ENSG00000248942 | 0.616711807 | 0 | 1.63305933 | 0.685736259 | 1 | LINC01335  |
| ENSG00000207333 | 0.616711807 | 0 | 1.63305933 | 0.685736259 | 1 | RNU6-680P  |
| ENSG00000214942 | 0.616711807 | 0 | 1.63305933 | 0.685736259 | 1 | AC113167.1 |
| ENSG00000254106 | 0.616711807 | 0 | 1.63305933 | 0.685736259 | 1 | LINC01848  |
| ENSG00000279772 | 0.616711807 | 0 | 1.63305933 | 0.685736259 | 1 | AC026422.1 |
| ENSG00000212460 | 0.616711807 | 0 | 1.63305933 | 0.685736259 | 1 | RNU6-460P  |
| ENSG00000249881 | 0.616711807 | 0 | 1.63305933 | 0.685736259 | 1 | AC008696.2 |
| ENSG00000244501 | 0.616711807 | 0 | 1.63305933 | 0.685736259 | 1 | RN7SL623P  |
| ENSG00000270839 | 0.616711807 | 0 | 1.63305933 | 0.685736259 | 1 | AC091393.1 |
| ENSG00000230570 | 0.616711807 | 0 | 1.63305933 | 0.685736259 | 1 | AL139095.3 |
| ENSG00000204528 | 0.616711807 | 0 | 1.63305933 | 0.685736259 | 1 | PSORS1C3   |
| ENSG00000204110 | 0.616711807 | 0 | 1.63305933 | 0.685736259 | 1 | LINC02520  |
| ENSG00000226070 | 0.616711807 | 0 | 1.63305933 | 0.685736259 | 1 | AL139275.1 |
| ENSG00000182793 | 0.616711807 | 0 | 1.63305933 | 0.685736259 | 1 | GSTA5      |
| ENSG00000234025 | 0.616711807 | 0 | 1.63305933 | 0.685736259 | 1 | RBPMS2P1   |
| ENSG00000155918 | 0.616711807 | 0 | 1.63305933 | 0.685736259 | 1 | RAET1L     |
| ENSG00000213078 | 0.616711807 | 0 | 1.63305933 | 0.685736259 | 1 | AL390955.1 |
| ENSG00000287558 | 0.616711807 | 0 | 1.63305933 | 0.685736259 | 1 | AL109933.5 |
| ENSG00000120440 | 0.616711807 | 0 | 1.63305933 | 0.685736259 | 1 | TTLL2      |
| ENSG00000213863 | 0.616711807 | 0 | 1.63305933 | 0.685736259 | 1 | AL672310.1 |

|                 |             |   |            |             |   |              |
|-----------------|-------------|---|------------|-------------|---|--------------|
| ENSG00000230435 | 0.616711807 | 0 | 1.63305933 | 0.685736259 | 1 | AC004160.2   |
| ENSG00000270593 | 0.616711807 | 0 | 1.63305933 | 0.685736259 | 1 | AC073333.2   |
| ENSG00000213717 | 0.616711807 | 0 | 1.63305933 | 0.685736259 | 1 | AC004692.1   |
| ENSG00000270617 | 0.616711807 | 0 | 1.63305933 | 0.685736259 | 1 | URGCP-MRPS24 |
| ENSG00000228751 | 0.616711807 | 0 | 1.63305933 | 0.685736259 | 1 | AC004022.1   |
| ENSG00000106302 | 0.616711807 | 0 | 1.63305933 | 0.685736259 | 1 | HYAL4        |
| ENSG00000211721 | 0.616711807 | 0 | 1.63305933 | 0.685736259 | 1 | TRBV6-5      |
| ENSG00000253188 | 0.616711807 | 0 | 1.63305933 | 0.685736259 | 1 | TRBV6-7      |
| ENSG00000225918 | 0.616711807 | 0 | 1.63305933 | 0.685736259 | 1 | RPL7P59      |
| ENSG00000223731 | 0.616711807 | 0 | 1.63305933 | 0.685736259 | 1 | SUPT20HL1    |
| ENSG00000230317 | 0.616711807 | 0 | 1.63305933 | 0.685736259 | 1 | LINC01284    |
| ENSG00000287685 | 0.616711807 | 0 | 1.63305933 | 0.685736259 | 1 | AC000113.1   |
| ENSG00000230392 | 0.616711807 | 0 | 1.63305933 | 0.685736259 | 1 | AC004835.1   |
| ENSG00000102195 | 0.616711807 | 0 | 1.63305933 | 0.685736259 | 1 | GPR50        |
| ENSG00000253147 | 0.616711807 | 0 | 1.63305933 | 0.685736259 | 1 | AC015468.1   |
| ENSG00000253474 | 0.616711807 | 0 | 1.63305933 | 0.685736259 | 1 | AC044893.1   |
| ENSG00000276673 | 0.616711807 | 0 | 1.63305933 | 0.685736259 | 1 | RF02271      |
| ENSG00000147896 | 0.616711807 | 0 | 1.63305933 | 0.685736259 | 1 | IFNK         |
| ENSG00000176007 | 0.616711807 | 0 | 1.63305933 | 0.685736259 | 1 | FAM220BP     |
| ENSG00000287212 | 0.616711807 | 0 | 1.63305933 | 0.685736259 | 1 | AL162585.1   |
| ENSG00000171481 | 0.616711807 | 0 | 1.63305933 | 0.685736259 | 1 | OR1L3        |
| ENSG00000271369 | 0.616711807 | 0 | 1.63305933 | 0.685736259 | 1 | AC087783.2   |
| ENSG00000254466 | 0.616711807 | 0 | 1.63305933 | 0.685736259 | 1 | OR4D10       |
| ENSG00000166926 | 0.616711807 | 0 | 1.63305933 | 0.685736259 | 1 | MS4A6E       |
| ENSG00000250230 | 0.616711807 | 0 | 1.63305933 | 0.685736259 | 1 | AP002754.1   |
| ENSG00000172938 | 0.616711807 | 0 | 1.63305933 | 0.685736259 | 1 | MRGPRD       |
| ENSG00000250946 | 0.616711807 | 0 | 1.63305933 | 0.685736259 | 1 | AP004833.1   |
| ENSG00000255502 | 0.616711807 | 0 | 1.63305933 | 0.685736259 | 1 | AP003730.2   |
| ENSG00000137675 | 0.616711807 | 0 | 1.63305933 | 0.685736259 | 1 | MMP27        |
| ENSG00000287006 | 0.616711807 | 0 | 1.63305933 | 0.685736259 | 1 | AP003100.3   |
| ENSG00000228667 | 0.616711807 | 0 | 1.63305933 | 0.685736259 | 1 | AL157385.1   |
| ENSG00000278992 | 0.616711807 | 0 | 1.63305933 | 0.685736259 | 1 | AC012048.1   |
| ENSG00000271385 | 0.616711807 | 0 | 1.63305933 | 0.685736259 | 1 | AL161798.1   |
| ENSG00000232767 | 0.616711807 | 0 | 1.63305933 | 0.685736259 | 1 | AC016825.1   |
| ENSG00000119973 | 0.616711807 | 0 | 1.63305933 | 0.685736259 | 1 | PRLHR        |
| ENSG00000279725 | 0.616711807 | 0 | 1.63305933 | 0.685736259 | 1 | AL391005.1   |
| ENSG00000257022 | 0.616711807 | 0 | 1.63305933 | 0.685736259 | 1 | AC008250.1   |
| ENSG00000205331 | 0.616711807 | 0 | 1.63305933 | 0.685736259 | 1 | OR6C72P      |
| ENSG00000256273 | 0.616711807 | 0 | 1.63305933 | 0.685736259 | 1 | AC022511.1   |
| ENSG00000254451 | 0.616711807 | 0 | 1.63305933 | 0.685736259 | 1 | AC091534.1   |
| ENSG00000249094 | 0.616711807 | 0 | 1.63305933 | 0.685736259 | 1 | AC007834.1   |
| ENSG00000286493 | 0.616711807 | 0 | 1.63305933 | 0.685736259 | 1 | AC069214.1   |
| ENSG00000278084 | 0.616711807 | 0 | 1.63305933 | 0.685736259 | 1 | AC069503.3   |
| ENSG00000255807 | 0.616711807 | 0 | 1.63305933 | 0.685736259 | 1 | PTP4A1P2     |
| ENSG00000287357 | 0.616711807 | 0 | 1.63305933 | 0.685736259 | 1 | AL512484.1   |
| ENSG00000255569 | 0.616711807 | 0 | 1.63305933 | 0.685736259 | 1 | TRAV1-1      |
| ENSG00000211807 | 0.616711807 | 0 | 1.63305933 | 0.685736259 | 1 | TRAV26-1     |
| ENSG00000211842 | 0.616711807 | 0 | 1.63305933 | 0.685736259 | 1 | TRAJ47       |
| ENSG00000211884 | 0.616711807 | 0 | 1.63305933 | 0.685736259 | 1 | TRAJ5        |
| ENSG00000257900 | 0.616711807 | 0 | 1.63305933 | 0.685736259 | 1 | AL162632.1   |
| ENSG00000258550 | 0.616711807 | 0 | 1.63305933 | 0.685736259 | 1 | OR7E106P     |

|                 |             |             |              |             |             |             |
|-----------------|-------------|-------------|--------------|-------------|-------------|-------------|
| ENSG00000199836 | 0.616711807 | 0           | 1.63305933   | 0.685736259 | 1           | RNU1-47P    |
| ENSG00000259023 | 0.616711807 | 0           | 1.63305933   | 0.685736259 | 1           | LINC00524   |
| ENSG00000225698 | 0.616711807 | 0           | 1.63305933   | 0.685736259 | 1           | IGHV3-72    |
| ENSG00000259025 | 0.616711807 | 0           | 1.63305933   | 0.685736259 | 1           | AC037471.1  |
| ENSG00000286598 | 0.616711807 | 0           | 1.63305933   | 0.685736259 | 1           | AC100756.4  |
| ENSG00000259446 | 0.616711807 | 0           | 1.63305933   | 0.685736259 | 1           | AC055874.1  |
| ENSG00000166947 | 0.616711807 | 0           | 1.63305933   | 0.685736259 | 1           | EPB42       |
| ENSG00000259306 | 0.616711807 | 0           | 1.63305933   | 0.685736259 | 1           | AC020891.2  |
| ENSG00000276473 | 0.616711807 | 0           | 1.63305933   | 0.685736259 | 1           | AC107905.1  |
| ENSG00000259530 | 0.616711807 | 0           | 1.63305933   | 0.685736259 | 1           | AC104574.1  |
| ENSG00000259504 | 0.616711807 | 0           | 1.63305933   | 0.685736259 | 1           | AC026992.1  |
| ENSG00000279705 | 0.616711807 | 0           | 1.63305933   | 0.685736259 | 1           | AC092701.1  |
| ENSG00000200204 | 0.616711807 | 0           | 1.63305933   | 0.685736259 | 1           | RNU1-22P    |
| ENSG00000262267 | 0.616711807 | 0           | 1.63305933   | 0.685736259 | 1           | U95743.1    |
| ENSG00000270472 | 0.616711807 | 0           | 1.63305933   | 0.685736259 | 1           | IGHV3OR16-9 |
| ENSG00000228133 | 0.616711807 | 0           | 1.63305933   | 0.685736259 | 1           | AC099684.1  |
| ENSG00000109061 | 0.616711807 | 0           | 1.63305933   | 0.685736259 | 1           | MYH1        |
| ENSG00000214946 | 0.616711807 | 0           | 1.63305933   | 0.685736259 | 1           | TBC1D26     |
| ENSG00000226549 | 0.616711807 | 0           | 1.63305933   | 0.685736259 | 1           | SCDP1       |
| ENSG00000283566 | 0.616711807 | 0           | 1.63305933   | 0.685736259 | 1           | AC243725.1  |
| ENSG00000171401 | 0.616711807 | 0           | 1.63305933   | 0.685736259 | 1           | KRT13       |
| ENSG00000244514 | 0.616711807 | 0           | 1.63305933   | 0.685736259 | 1           | RN7SL125P   |
| ENSG00000266117 | 0.616711807 | 0           | 1.63305933   | 0.685736259 | 1           | FBXO36P1    |
| ENSG00000264750 | 0.616711807 | 0           | 1.63305933   | 0.685736259 | 1           | AC032019.1  |
| ENSG00000265179 | 0.616711807 | 0           | 1.63305933   | 0.685736259 | 1           | AP000894.2  |
| ENSG00000260913 | 0.616711807 | 0           | 1.63305933   | 0.685736259 | 1           | LINC01254   |
| ENSG00000283084 | 0.616711807 | 0           | 1.63305933   | 0.685736259 | 1           | AC026634.1  |
| ENSG00000207160 | 0.616711807 | 0           | 1.63305933   | 0.685736259 | 1           | RNU6-1289P  |
| ENSG00000134765 | 0.616711807 | 0           | 1.63305933   | 0.685736259 | 1           | DSC1        |
| ENSG00000213820 | 0.616711807 | 0           | 1.63305933   | 0.685736259 | 1           | RPL13P2     |
| ENSG00000235594 | 0.616711807 | 0           | 1.63305933   | 0.685736259 | 1           | AL139824.2  |
| ENSG00000270411 | 0.616711807 | 0           | 1.63305933   | 0.685736259 | 1           | AL354984.3  |
| ENSG00000186529 | 0.616711807 | 0           | 1.63305933   | 0.685736259 | 1           | CYP4F3      |
| ENSG00000274800 | 0.616711807 | 0           | 1.63305933   | 0.685736259 | 1           | AC007204.2  |
| ENSG00000196109 | 0.616711807 | 0           | 1.63305933   | 0.685736259 | 1           | ZNF676      |
| ENSG00000142515 | 0.616711807 | 0           | 1.63305933   | 0.685736259 | 1           | KLK3        |
| ENSG00000197213 | 0.616711807 | 0           | 1.63305933   | 0.685736259 | 1           | ZSCAN5B     |
| ENSG00000252211 | 0.616711807 | 0           | 1.63305933   | 0.685736259 | 1           | RNA5SP473   |
| ENSG00000230025 | 0.616711807 | 0           | 1.63305933   | 0.685736259 | 1           | AC007967.3  |
| ENSG00000206069 | 0.616711807 | 0           | 1.63305933   | 0.685736259 | 1           | TMEM211     |
| ENSG00000286326 | 0.616711807 | 0           | 1.63305933   | 0.685736259 | 1           | Z95115.2    |
| ENSG00000234208 | 0.616711807 | 0           | 1.63305933   | 0.685736259 | 1           | AC005529.1  |
| ENSG00000236054 | 0.616711807 | 0           | 1.63305933   | 0.685736259 | 1           | Z82246.1    |
| ENSG00000235237 | 0.616711807 | 0           | 1.63305933   | 0.685736259 | 1           | Z82188.2    |
| novel.570       | 0.616711807 | 0           | 1.63305933   | 0.685736259 | 1           | -           |
| novel.767       | 0.616711807 | 0           | 1.63305933   | 0.685736259 | 1           | -           |
| ENSG00000217416 | 13.42041269 | 16.38753234 | -0.286133483 | 0.685781593 | 0.778081644 | ISCA1P1     |
| ENSG00000243234 | 2.080408748 | 1.00940975  | 1.025920564  | 0.685905482 | 0.778154243 | AC010326.1  |
| ENSG00000251971 | 2.080408748 | 1.00940975  | 1.025920564  | 0.685905482 | 0.778154243 | RNU6-1333P  |
| ENSG00000146243 | 102.5064791 | 114.0102605 | -0.155084215 | 0.685995345 | 0.778222211 | IRAK1BP1    |
| ENSG00000226763 | 10.78722857 | 13.3688881  | -0.304767435 | 0.686081124 | 0.77823848  | SRRM5       |

|                 |             |             |              |             |             |             |
|-----------------|-------------|-------------|--------------|-------------|-------------|-------------|
| ENSG00000271601 | 1222.331995 | 1155.170176 | 0.081452237  | 0.686095915 | 0.77823848  | LIX1L       |
| ENSG00000187987 | 25.70282196 | 29.44001962 | -0.191340215 | 0.686099549 | 0.77823848  | ZSCAN23     |
| ENSG00000144746 | 3196.272378 | 3003.898752 | 0.089453594  | 0.686156335 | 0.778268913 | ARL6IP5     |
| ENSG00000188459 | 0.923814062 | 0.356539013 | 1.253937369  | 0.686158483 | 1           | WASF4P      |
| ENSG00000246465 | 0.923814062 | 0.356539013 | 1.253937369  | 0.686158483 | 1           | AC138904.1  |
| ENSG00000135902 | 0.923814062 | 0.356539013 | 1.253937369  | 0.686158483 | 1           | CHRND       |
| ENSG00000224781 | 0.923814062 | 0.356539013 | 1.253937369  | 0.686158483 | 1           | EIF4A2P4    |
| ENSG00000285551 | 0.615458159 | 0           | 1.630500136  | 0.686219096 | 1           | AC067752.1  |
| ENSG00000250710 | 0.615458159 | 0           | 1.630500136  | 0.686219096 | 1           | OR7E99P     |
| ENSG00000234311 | 0.615458159 | 0           | 1.630500136  | 0.686219096 | 1           | AL451069.3  |
| ENSG00000267136 | 0.615458159 | 0           | 1.630500136  | 0.686219096 | 1           | AP005131.1  |
| ENSG00000238269 | 0.615458159 | 0           | 1.630500136  | 0.686219096 | 1           | PAGE2B      |
| ENSG00000261433 | 0.615458159 | 0           | 1.630500136  | 0.686219096 | 1           | AC002347.1  |
| ENSG00000227019 | 0.615458159 | 0           | 1.630500136  | 0.686219096 | 1           | OR7E101P    |
| ENSG00000230316 | 0.615458159 | 0           | 1.630500136  | 0.686219096 | 1           | FEZF1-AS1   |
| ENSG00000260585 | 0.615458159 | 0           | 1.630500136  | 0.686219096 | 1           | AL359851.1  |
| ENSG00000286900 | 0.615458159 | 0           | 1.630500136  | 0.686219096 | 1           | AL590235.2  |
| ENSG00000264404 | 0.615458159 | 0           | 1.630500136  | 0.686219096 | 1           | LINC02675   |
| ENSG00000257657 | 0.615458159 | 0           | 1.630500136  | 0.686219096 | 1           | AC079950.1  |
| ENSG00000270716 | 0.615458159 | 0           | 1.630500136  | 0.686219096 | 1           | BNIP3P15    |
| ENSG00000202019 | 0.615458159 | 0           | 1.630500136  | 0.686219096 | 1           | RF00019     |
| ENSG00000224739 | 0.615458159 | 0           | 1.630500136  | 0.686219096 | 1           | AC016735.1  |
| ENSG00000231560 | 0.615458159 | 0           | 1.630500136  | 0.686219096 | 1           | CLEC12A-AS1 |
| ENSG00000227290 | 0.615458159 | 0           | 1.630500136  | 0.686219096 | 1           | LINC01364   |
| ENSG00000177233 | 0.615458159 | 0           | 1.630500136  | 0.686219096 | 1           | OR2M1P      |
| ENSG00000226636 | 0.615458159 | 0           | 1.630500136  | 0.686219096 | 1           | AC006020.1  |
| ENSG00000287425 | 0.615458159 | 0           | 1.630500136  | 0.686219096 | 1           | AP003717.4  |
| ENSG00000165972 | 0.615458159 | 0           | 1.630500136  | 0.686219096 | 1           | CCDC38      |
| ENSG00000286931 | 0.615458159 | 0           | 1.630500136  | 0.686219096 | 1           | AL136419.3  |
| ENSG00000180042 | 0.615458159 | 0           | 1.630500136  | 0.686219096 | 1           | AC087498.1  |
| ENSG00000284842 | 0.615458159 | 0           | 1.630500136  | 0.686219096 | 1           | FAM91A2P    |
| ENSG00000236863 | 0.615458159 | 0           | 1.630500136  | 0.686219096 | 1           | RPL23AP23   |
| ENSG00000229160 | 0.615458159 | 0           | 1.630500136  | 0.686219096 | 1           | AC009229.2  |
| ENSG00000163046 | 0.615458159 | 0           | 1.630500136  | 0.686219096 | 1           | ANKRD30BL   |
| ENSG00000245466 | 0.615458159 | 0           | 1.630500136  | 0.686219096 | 1           | AL357153.1  |
| ENSG00000246740 | 0.615458159 | 0           | 1.630500136  | 0.686219096 | 1           | PLA2G4E-AS1 |
| ENSG00000225867 | 0.615458159 | 0           | 1.630500136  | 0.686219096 | 1           | AL022315.1  |
| ENSG00000235497 | 0.615458159 | 0           | 1.630500136  | 0.686219096 | 1           | AC012506.4  |
| ENSG00000283283 | 0.615458159 | 0           | 1.630500136  | 0.686219096 | 1           | AC013268.4  |
| ENSG00000220884 | 0.615458159 | 0           | 1.630500136  | 0.686219096 | 1           | MESTP1      |
| ENSG00000281039 | 0.615458159 | 0           | 1.630500136  | 0.686219096 | 1           | AC005154.5  |
| ENSG00000226645 | 0.615458159 | 0           | 1.630500136  | 0.686219096 | 1           | AP006216.1  |
| ENSG00000286779 | 0.615458159 | 0           | 1.630500136  | 0.686219096 | 1           | AL139081.2  |
| ENSG00000123201 | 0.615458159 | 0           | 1.630500136  | 0.686219096 | 1           | GUCY1B2     |
| ENSG00000074660 | 0.615458159 | 0           | 1.630500136  | 0.686219096 | 1           | SCARF1      |
| ENSG00000286472 | 0.615458159 | 0           | 1.630500136  | 0.686219096 | 1           | AL035252.5  |
| ENSG00000267760 | 0.615458159 | 0           | 1.630500136  | 0.686219096 | 1           | AC011478.1  |
| ENSG00000287661 | 0.615458159 | 0           | 1.630500136  | 0.686219096 | 1           | AL391844.1  |
| ENSG00000249335 | 0.615458159 | 0           | 1.630500136  | 0.686219096 | 1           | AC093523.1  |
| ENSG00000249085 | 0.615458159 | 0           | 1.630500136  | 0.686219096 | 1           | AC035140.1  |
| ENSG00000272619 | 0.615458159 | 0           | 1.630500136  | 0.686219096 | 1           | AC093673.2  |

|                 |             |             |              |             |             |             |
|-----------------|-------------|-------------|--------------|-------------|-------------|-------------|
| ENSG00000242048 | 0.615458159 | 0           | 1.630500136  | 0.686219096 | 1           | AC093583.1  |
| ENSG00000232946 | 0.615458159 | 0           | 1.630500136  | 0.686219096 | 1           | AL354707.3  |
| ENSG00000273513 | 0.615458159 | 0           | 1.630500136  | 0.686219096 | 1           | TBC1D3K     |
| ENSG00000197079 | 0.615458159 | 0           | 1.630500136  | 0.686219096 | 1           | KRT35       |
| ENSG00000279433 | 0.615458159 | 0           | 1.630500136  | 0.686219096 | 1           | AC018529.3  |
| ENSG00000283175 | 0.615458159 | 0           | 1.630500136  | 0.686219096 | 1           | AC007920.2  |
| ENSG00000249425 | 0.615458159 | 0           | 1.630500136  | 0.686219096 | 1           | LINC02477   |
| ENSG00000251168 | 0.615458159 | 0           | 1.630500136  | 0.686219096 | 1           | AC025174.1  |
| ENSG00000287090 | 0.615458159 | 0           | 1.630500136  | 0.686219096 | 1           | AC116345.4  |
| ENSG00000199398 | 0.615458159 | 0           | 1.630500136  | 0.686219096 | 1           | RF00019     |
| ENSG00000179131 | 0.615458159 | 0           | 1.630500136  | 0.686219096 | 1           | AC073335.1  |
| ENSG00000231906 | 0.615458159 | 0           | 1.630500136  | 0.686219096 | 1           | AC016397.1  |
| ENSG00000271065 | 0.615458159 | 0           | 1.630500136  | 0.686219096 | 1           | AC107031.1  |
| ENSG00000156885 | 0.615458159 | 0           | 1.630500136  | 0.686219096 | 1           | COX6A2      |
| ENSG00000270120 | 0.615458159 | 0           | 1.630500136  | 0.686219096 | 1           | AC007728.3  |
| ENSG00000263720 | 0.615458159 | 0           | 1.630500136  | 0.686219096 | 1           | AC023394.2  |
| ENSG00000278276 | 0.615458159 | 0           | 1.630500136  | 0.686219096 | 1           | AL110115.2  |
| ENSG00000241721 | 0.615458159 | 0           | 1.630500136  | 0.686219096 | 1           | SUMO1P1     |
| ENSG00000266802 | 0.615458159 | 0           | 1.630500136  | 0.686219096 | 1           | AL031428.2  |
| ENSG00000237227 | 0.615458159 | 0           | 1.630500136  | 0.686219096 | 1           | AL162739.1  |
| ENSG00000266618 | 0.615458159 | 0           | 1.630500136  | 0.686219096 | 1           | MIR4742     |
| ENSG00000236856 | 0.615458159 | 0           | 1.630500136  | 0.686219096 | 1           | AC105393.2  |
| ENSG00000227480 | 0.615458159 | 0           | 1.630500136  | 0.686219096 | 1           | CCDC148-AS1 |
| ENSG00000181260 | 0.615458159 | 0           | 1.630500136  | 0.686219096 | 1           | MTHFD2P7    |
| ENSG00000251459 | 0.615458159 | 0           | 1.630500136  | 0.686219096 | 1           | AC013724.1  |
| ENSG00000214676 | 0.615458159 | 0           | 1.630500136  | 0.686219096 | 1           | RPL9P16     |
| ENSG00000223665 | 0.615458159 | 0           | 1.630500136  | 0.686219096 | 1           | AC000058.1  |
| ENSG00000271404 | 0.615458159 | 0           | 1.630500136  | 0.686219096 | 1           | MZT1P2      |
| ENSG00000270236 | 0.615458159 | 0           | 1.630500136  | 0.686219096 | 1           | AL162730.1  |
| ENSG00000196600 | 0.615458159 | 0           | 1.630500136  | 0.686219096 | 1           | SLC22A25    |
| ENSG00000231964 | 0.615458159 | 0           | 1.630500136  | 0.686219096 | 1           | AL731567.1  |
| ENSG00000258546 | 0.615458159 | 0           | 1.630500136  | 0.686219096 | 1           | CENPUP2     |
| ENSG00000201469 | 0.615458159 | 0           | 1.630500136  | 0.686219096 | 1           | RNA5SP379   |
| ENSG00000279466 | 0.615458159 | 0           | 1.630500136  | 0.686219096 | 1           | AC073911.2  |
| ENSG00000276476 | 0.615458159 | 0           | 1.630500136  | 0.686219096 | 1           | AL136962.1  |
| ENSG00000211790 | 0.615458159 | 0           | 1.630500136  | 0.686219096 | 1           | TRAV8-4     |
| ENSG00000211797 | 0.615458159 | 0           | 1.630500136  | 0.686219096 | 1           | TRAV17      |
| ENSG00000211805 | 0.615458159 | 0           | 1.630500136  | 0.686219096 | 1           | TRAV24      |
| ENSG00000211888 | 0.615458159 | 0           | 1.630500136  | 0.686219096 | 1           | TRAJ1       |
| ENSG00000286551 | 0.615458159 | 0           | 1.630500136  | 0.686219096 | 1           | AL355836.2  |
| ENSG00000270705 | 0.615458159 | 0           | 1.630500136  | 0.686219096 | 1           | AL161669.2  |
| ENSG00000259255 | 0.615458159 | 0           | 1.630500136  | 0.686219096 | 1           | AC073941.1  |
| ENSG00000214917 | 0.615458159 | 0           | 1.630500136  | 0.686219096 | 1           | AC011825.1  |
| ENSG00000267406 | 0.615458159 | 0           | 1.630500136  | 0.686219096 | 1           | AC011509.1  |
| ENSG00000249263 | 0.615458159 | 0           | 1.630500136  | 0.686219096 | 1           | PARP4P3     |
| ENSG00000223287 | 0.615458159 | 0           | 1.630500136  | 0.686219096 | 1           | RNU6-954P   |
| ENSG00000224924 | 0.615458159 | 0           | 1.630500136  | 0.686219096 | 1           | LINC00320   |
| ENSG00000233922 | 3.695256249 | 5.604150329 | -0.597337796 | 0.686226495 | 0.77828883  | LINC01694   |
| ENSG00000182916 | 408.3097646 | 378.4821479 | 0.109968571  | 0.686233807 | 0.77828883  | TCEAL7      |
| ENSG00000112761 | 3.345316124 | 2.171071533 | 0.626306354  | 0.686332311 | 0.778366571 | CCN6        |
| ENSG00000148484 | 2160.799097 | 2040.437068 | 0.082690777  | 0.686527905 | 0.778554409 | RSU1        |

|                 |             |             |             |             |   |            |
|-----------------|-------------|-------------|-------------|-------------|---|------------|
| ENSG00000285649 | 0.922560414 | 0.356539013 | 1.25228005  | 0.686593925 | 1 | AL357079.2 |
| ENSG00000229862 | 0.922560414 | 0.356539013 | 1.25228005  | 0.686593925 | 1 | AL121972.1 |
| ENSG00000175097 | 0.922560414 | 0.356539013 | 1.25228005  | 0.686593925 | 1 | RAG2       |
| ENSG00000251288 | 0.922560414 | 0.356539013 | 1.25228005  | 0.686593925 | 1 | AC018797.2 |
| ENSG00000137976 | 0.922560414 | 0.356539013 | 1.25228005  | 0.686593925 | 1 | DNASE2B    |
| ENSG00000264007 | 0.922560414 | 0.356539013 | 1.25228005  | 0.686593925 | 1 | AC104564.2 |
| ENSG00000251129 | 0.922560414 | 0.356539013 | 1.25228005  | 0.686593925 | 1 | LINC02506  |
| ENSG00000234722 | 0.922560414 | 0.356539013 | 1.25228005  | 0.686593925 | 1 | LINC01287  |
| ENSG00000242236 | 0.922560414 | 0.356539013 | 1.25228005  | 0.686593925 | 1 | RN7SL594P  |
| ENSG00000234139 | 0.922560414 | 0.356539013 | 1.25228005  | 0.686593925 | 1 | AL035420.1 |
| ENSG00000152034 | 0.61420451  | 0           | 1.627939224 | 0.68670236  | 1 | MCHR2      |
| ENSG00000257531 | 0.61420451  | 0           | 1.627939224 | 0.68670236  | 1 | AC008147.3 |
| ENSG00000263438 | 0.61420451  | 0           | 1.627939224 | 0.68670236  | 1 | LINC01919  |
| ENSG00000144191 | 0.61420451  | 0           | 1.627939224 | 0.68670236  | 1 | CNGA3      |
| ENSG00000167749 | 0.61420451  | 0           | 1.627939224 | 0.68670236  | 1 | KLK4       |
| ENSG00000279581 | 0.61420451  | 0           | 1.627939224 | 0.68670236  | 1 | AC073862.2 |
| ENSG00000183347 | 0.61420451  | 0           | 1.627939224 | 0.68670236  | 1 | GBP6       |
| ENSG00000177275 | 0.61420451  | 0           | 1.627939224 | 0.68670236  | 1 | OR2AJ1     |
| ENSG00000184012 | 0.61420451  | 0           | 1.627939224 | 0.68670236  | 1 | TMPRSS2    |
| ENSG00000258066 | 0.61420451  | 0           | 1.627939224 | 0.68670236  | 1 | AC138331.1 |
| ENSG00000256955 | 0.61420451  | 0           | 1.627939224 | 0.68670236  | 1 | AC131009.2 |
| ENSG00000280177 | 0.61420451  | 0           | 1.627939224 | 0.68670236  | 1 | AC004408.2 |
| ENSG00000283209 | 0.61420451  | 0           | 1.627939224 | 0.68670236  | 1 | AC106858.1 |
| ENSG00000263586 | 0.61420451  | 0           | 1.627939224 | 0.68670236  | 1 | HID1-AS1   |
| ENSG00000287442 | 0.61420451  | 0           | 1.627939224 | 0.68670236  | 1 | AC079460.1 |
| ENSG00000271787 | 0.61420451  | 0           | 1.627939224 | 0.68670236  | 1 | AC104794.4 |
| ENSG00000250777 | 0.61420451  | 0           | 1.627939224 | 0.68670236  | 1 | AC131956.2 |
| ENSG00000207105 | 0.61420451  | 0           | 1.627939224 | 0.68670236  | 1 | RF00019    |
| ENSG00000285848 | 0.61420451  | 0           | 1.627939224 | 0.68670236  | 1 | AC025280.3 |
| ENSG00000235672 | 0.61420451  | 0           | 1.627939224 | 0.68670236  | 1 | AC090286.2 |
| ENSG00000242441 | 0.61420451  | 0           | 1.627939224 | 0.68670236  | 1 | GTF2A1L    |
| ENSG00000286654 | 0.61420451  | 0           | 1.627939224 | 0.68670236  | 1 | AC092636.1 |
| ENSG00000251634 | 0.61420451  | 0           | 1.627939224 | 0.68670236  | 1 | AC145138.1 |
| ENSG00000134827 | 0.61420451  | 0           | 1.627939224 | 0.68670236  | 1 | TCN1       |
| ENSG00000276454 | 0.61420451  | 0           | 1.627939224 | 0.68670236  | 1 | AC008083.3 |
| ENSG00000231898 | 0.61420451  | 0           | 1.627939224 | 0.68670236  | 1 | MYO3B-AS1  |
| ENSG00000287623 | 0.61420451  | 0           | 1.627939224 | 0.68670236  | 1 | AC037193.1 |
| ENSG00000251752 | 0.61420451  | 0           | 1.627939224 | 0.68670236  | 1 | RNU4-29P   |
| ENSG00000258913 | 0.61420451  | 0           | 1.627939224 | 0.68670236  | 1 | LINC02691  |
| ENSG00000248795 | 0.61420451  | 0           | 1.627939224 | 0.68670236  | 1 | AC098859.1 |
| ENSG00000239393 | 0.61420451  | 0           | 1.627939224 | 0.68670236  | 1 | AC146507.1 |
| ENSG00000111261 | 0.61420451  | 0           | 1.627939224 | 0.68670236  | 1 | MANSC1     |
| ENSG00000258710 | 0.61420451  | 0           | 1.627939224 | 0.68670236  | 1 | LINC01193  |
| ENSG00000260619 | 0.61420451  | 0           | 1.627939224 | 0.68670236  | 1 | AC068870.1 |
| ENSG00000263201 | 0.61420451  | 0           | 1.627939224 | 0.68670236  | 1 | DPEP2NB    |
| ENSG00000265135 | 0.61420451  | 0           | 1.627939224 | 0.68670236  | 1 | MIR5687    |
| ENSG00000207624 | 0.61420451  | 0           | 1.627939224 | 0.68670236  | 1 | MIR194-1   |
| ENSG00000280360 | 0.61420451  | 0           | 1.627939224 | 0.68670236  | 1 | AC092159.4 |
| ENSG00000287305 | 0.61420451  | 0           | 1.627939224 | 0.68670236  | 1 | AC010969.3 |
| ENSG00000235369 | 0.61420451  | 0           | 1.627939224 | 0.68670236  | 1 | RPL36AP15  |
| ENSG00000223911 | 0.61420451  | 0           | 1.627939224 | 0.68670236  | 1 | AC009480.1 |

|                 |            |   |             |            |   |            |
|-----------------|------------|---|-------------|------------|---|------------|
| ENSG00000234999 | 0.61420451 | 0 | 1.627939224 | 0.68670236 | 1 | SNRPCP19   |
| ENSG00000254366 | 0.61420451 | 0 | 1.627939224 | 0.68670236 | 1 | AC062004.1 |
| ENSG00000275390 | 0.61420451 | 0 | 1.627939224 | 0.68670236 | 1 | AL353626.1 |
| ENSG00000075673 | 0.61420451 | 0 | 1.627939224 | 0.68670236 | 1 | ATP12A     |
| ENSG00000259666 | 0.61420451 | 0 | 1.627939224 | 0.68670236 | 1 | LINGO1-AS1 |
| ENSG00000263698 | 0.61420451 | 0 | 1.627939224 | 0.68670236 | 1 | AC012417.1 |
| ENSG00000234869 | 0.61420451 | 0 | 1.627939224 | 0.68670236 | 1 | AL021392.1 |
| ENSG00000287424 | 0.61420451 | 0 | 1.627939224 | 0.68670236 | 1 | AC080079.2 |
| ENSG00000287614 | 0.61420451 | 0 | 1.627939224 | 0.68670236 | 1 | AL158198.2 |
| ENSG00000196114 | 0.61420451 | 0 | 1.627939224 | 0.68670236 | 1 | AL031577.1 |
| ENSG00000286540 | 0.61420451 | 0 | 1.627939224 | 0.68670236 | 1 | AL096854.1 |
| ENSG00000287844 | 0.61420451 | 0 | 1.627939224 | 0.68670236 | 1 | AC018953.2 |
| ENSG00000236796 | 0.61420451 | 0 | 1.627939224 | 0.68670236 | 1 | AL157884.3 |
| ENSG00000232798 | 0.61420451 | 0 | 1.627939224 | 0.68670236 | 1 | CR769767.1 |
| ENSG00000286708 | 0.61420451 | 0 | 1.627939224 | 0.68670236 | 1 | AP003783.1 |
| ENSG00000287556 | 0.61420451 | 0 | 1.627939224 | 0.68670236 | 1 | AP003973.4 |
| ENSG00000213137 | 0.61420451 | 0 | 1.627939224 | 0.68670236 | 1 | ARF1P2     |
| ENSG00000176136 | 0.61420451 | 0 | 1.627939224 | 0.68670236 | 1 | MCSR       |
| ENSG00000275186 | 0.61420451 | 0 | 1.627939224 | 0.68670236 | 1 | AC018445.1 |
| ENSG00000161031 | 0.61420451 | 0 | 1.627939224 | 0.68670236 | 1 | PGLYRP2    |
| ENSG00000239648 | 0.61420451 | 0 | 1.627939224 | 0.68670236 | 1 | MTND1P3    |
| ENSG00000165164 | 0.61420451 | 0 | 1.627939224 | 0.68670236 | 1 | CFAP47     |
| ENSG00000132297 | 0.61420451 | 0 | 1.627939224 | 0.68670236 | 1 | HHLA1      |
| ENSG00000276500 | 0.61420451 | 0 | 1.627939224 | 0.68670236 | 1 | BMS1P14    |
| ENSG00000236541 | 0.61420451 | 0 | 1.627939224 | 0.68670236 | 1 | VN2R9P     |
| ENSG00000285254 | 0.61420451 | 0 | 1.627939224 | 0.68670236 | 1 | AL513128.2 |
| ENSG00000224919 | 0.61420451 | 0 | 1.627939224 | 0.68670236 | 1 | AL591684.1 |
| ENSG00000257494 | 0.61420451 | 0 | 1.627939224 | 0.68670236 | 1 | AC004217.1 |
| ENSG00000231983 | 0.61420451 | 0 | 1.627939224 | 0.68670236 | 1 | LINC00415  |
| ENSG00000279834 | 0.61420451 | 0 | 1.627939224 | 0.68670236 | 1 | AC068870.3 |
| ENSG00000185594 | 0.61420451 | 0 | 1.627939224 | 0.68670236 | 1 | SPATA8     |
| ENSG00000260714 | 0.61420451 | 0 | 1.627939224 | 0.68670236 | 1 | AC133552.1 |
| ENSG00000277268 | 0.61420451 | 0 | 1.627939224 | 0.68670236 | 1 | LHX1-DT    |
| ENSG00000267324 | 0.61420451 | 0 | 1.627939224 | 0.68670236 | 1 | AC006557.2 |
| ENSG00000252549 | 0.61420451 | 0 | 1.627939224 | 0.68670236 | 1 | RNU6-759P  |
| ENSG00000171773 | 0.61420451 | 0 | 1.627939224 | 0.68670236 | 1 | NXNL1      |
| ENSG00000244482 | 0.61420451 | 0 | 1.627939224 | 0.68670236 | 1 | LILRA6     |
| ENSG00000277095 | 0.61420451 | 0 | 1.627939224 | 0.68670236 | 1 | AC242852.2 |
| ENSG00000263464 | 0.61420451 | 0 | 1.627939224 | 0.68670236 | 1 | PPIAL4C    |
| ENSG00000233771 | 0.61420451 | 0 | 1.627939224 | 0.68670236 | 1 | CICP5      |
| ENSG00000197067 | 0.61420451 | 0 | 1.627939224 | 0.68670236 | 1 | OR2T32P    |
| ENSG00000233747 | 0.61420451 | 0 | 1.627939224 | 0.68670236 | 1 | RPL36AP13  |
| ENSG00000264071 | 0.61420451 | 0 | 1.627939224 | 0.68670236 | 1 | RN7SL531P  |
| ENSG00000237574 | 0.61420451 | 0 | 1.627939224 | 0.68670236 | 1 | LINC01856  |
| ENSG00000239677 | 0.61420451 | 0 | 1.627939224 | 0.68670236 | 1 | PDZRN3-AS1 |
| ENSG00000250623 | 0.61420451 | 0 | 1.627939224 | 0.68670236 | 1 | AL136360.2 |
| ENSG00000249228 | 0.61420451 | 0 | 1.627939224 | 0.68670236 | 1 | AC068944.1 |
| ENSG00000251632 | 0.61420451 | 0 | 1.627939224 | 0.68670236 | 1 | LINC02172  |
| ENSG00000249266 | 0.61420451 | 0 | 1.627939224 | 0.68670236 | 1 | MTHFD2P6   |
| ENSG00000251435 | 0.61420451 | 0 | 1.627939224 | 0.68670236 | 1 | C1GALT1P2  |
| ENSG00000233847 | 0.61420451 | 0 | 1.627939224 | 0.68670236 | 1 | AC022445.1 |

|                 |            |   |             |            |   |             |
|-----------------|------------|---|-------------|------------|---|-------------|
| ENSG00000251387 | 0.61420451 | 0 | 1.627939224 | 0.68670236 | 1 | AC008667.3  |
| ENSG00000112333 | 0.61420451 | 0 | 1.627939224 | 0.68670236 | 1 | NR2E1       |
| ENSG00000272968 | 0.61420451 | 0 | 1.627939224 | 0.68670236 | 1 | RBAK-RBAKDN |
| ENSG00000214128 | 0.61420451 | 0 | 1.627939224 | 0.68670236 | 1 | TMEM213     |
| ENSG00000237859 | 0.61420451 | 0 | 1.627939224 | 0.68670236 | 1 | EEF1A1P31   |
| ENSG00000165061 | 0.61420451 | 0 | 1.627939224 | 0.68670236 | 1 | ZMAT4       |
| ENSG00000259602 | 0.61420451 | 0 | 1.627939224 | 0.68670236 | 1 | AC091073.1  |
| ENSG00000232241 | 0.61420451 | 0 | 1.627939224 | 0.68670236 | 1 | DYNLT3P1    |
| ENSG00000277558 | 0.61420451 | 0 | 1.627939224 | 0.68670236 | 1 | AL109923.1  |
| ENSG00000267054 | 0.61420451 | 0 | 1.627939224 | 0.68670236 | 1 | AC008738.1  |
| ENSG00000173231 | 0.61420451 | 0 | 1.627939224 | 0.68670236 | 1 | TERF1P1     |
| ENSG00000212257 | 0.61420451 | 0 | 1.627939224 | 0.68670236 | 1 | RNU6-1176P  |
| ENSG00000162782 | 0.61420451 | 0 | 1.627939224 | 0.68670236 | 1 | TDRD5       |
| ENSG00000162949 | 0.61420451 | 0 | 1.627939224 | 0.68670236 | 1 | CAPN13      |
| ENSG00000232374 | 0.61420451 | 0 | 1.627939224 | 0.68670236 | 1 | GPR79       |
| ENSG00000161267 | 0.61420451 | 0 | 1.627939224 | 0.68670236 | 1 | BDH1        |
| ENSG00000269966 | 0.61420451 | 0 | 1.627939224 | 0.68670236 | 1 | AL136164.2  |
| ENSG00000220695 | 0.61420451 | 0 | 1.627939224 | 0.68670236 | 1 | Z86062.1    |
| ENSG00000226193 | 0.61420451 | 0 | 1.627939224 | 0.68670236 | 1 | AL049548.1  |
| ENSG00000230831 | 0.61420451 | 0 | 1.627939224 | 0.68670236 | 1 | AC007349.2  |
| ENSG00000214313 | 0.61420451 | 0 | 1.627939224 | 0.68670236 | 1 | AZGP1P1     |
| ENSG00000231808 | 0.61420451 | 0 | 1.627939224 | 0.68670236 | 1 | LINC01388   |
| ENSG00000239705 | 0.61420451 | 0 | 1.627939224 | 0.68670236 | 1 | AL354710.2  |
| ENSG00000254768 | 0.61420451 | 0 | 1.627939224 | 0.68670236 | 1 | AC104009.1  |
| ENSG00000254489 | 0.61420451 | 0 | 1.627939224 | 0.68670236 | 1 | MPPED2-AS1  |
| ENSG00000285933 | 0.61420451 | 0 | 1.627939224 | 0.68670236 | 1 | AP003498.3  |
| ENSG00000224745 | 0.61420451 | 0 | 1.627939224 | 0.68670236 | 1 | AC063965.1  |
| ENSG00000207976 | 0.61420451 | 0 | 1.627939224 | 0.68670236 | 1 | MIR607      |
| ENSG00000258331 | 0.61420451 | 0 | 1.627939224 | 0.68670236 | 1 | LINC02461   |
| ENSG00000257539 | 0.61420451 | 0 | 1.627939224 | 0.68670236 | 1 | HSPA8P14    |
| ENSG00000103546 | 0.61420451 | 0 | 1.627939224 | 0.68670236 | 1 | SLC6A2      |
| ENSG00000213035 | 0.61420451 | 0 | 1.627939224 | 0.68670236 | 1 | RPL23AP80   |
| ENSG00000237402 | 0.61420451 | 0 | 1.627939224 | 0.68670236 | 1 | CAMTA1-IT1  |
| ENSG00000285853 | 0.61420451 | 0 | 1.627939224 | 0.68670236 | 1 | AL137802.3  |
| ENSG00000233359 | 0.61420451 | 0 | 1.627939224 | 0.68670236 | 1 | AC114485.1  |
| ENSG00000143125 | 0.61420451 | 0 | 1.627939224 | 0.68670236 | 1 | PROK1       |
| ENSG00000261595 | 0.61420451 | 0 | 1.627939224 | 0.68670236 | 1 | AL603832.2  |
| ENSG00000230381 | 0.61420451 | 0 | 1.627939224 | 0.68670236 | 1 | AL136376.1  |
| ENSG00000273516 | 0.61420451 | 0 | 1.627939224 | 0.68670236 | 1 | RF00003     |
| ENSG00000206791 | 0.61420451 | 0 | 1.627939224 | 0.68670236 | 1 | RNU1-129P   |
| ENSG00000254706 | 0.61420451 | 0 | 1.627939224 | 0.68670236 | 1 | AL512785.2  |
| ENSG00000253060 | 0.61420451 | 0 | 1.627939224 | 0.68670236 | 1 | RF00601     |
| ENSG00000200755 | 0.61420451 | 0 | 1.627939224 | 0.68670236 | 1 | RNA5SP68    |
| ENSG00000261060 | 0.61420451 | 0 | 1.627939224 | 0.68670236 | 1 | AL160286.2  |
| ENSG00000232212 | 0.61420451 | 0 | 1.627939224 | 0.68670236 | 1 | LINC01701   |
| ENSG00000287395 | 0.61420451 | 0 | 1.627939224 | 0.68670236 | 1 | AL118511.3  |
| ENSG00000231031 | 0.61420451 | 0 | 1.627939224 | 0.68670236 | 1 | LINC01804   |
| ENSG00000242272 | 0.61420451 | 0 | 1.627939224 | 0.68670236 | 1 | AK2P2       |
| ENSG00000232285 | 0.61420451 | 0 | 1.627939224 | 0.68670236 | 1 | ELOBP3      |
| ENSG00000214064 | 0.61420451 | 0 | 1.627939224 | 0.68670236 | 1 | RPL6P5      |
| ENSG00000228937 | 0.61420451 | 0 | 1.627939224 | 0.68670236 | 1 | AC005539.1  |



|                 |            |   |             |            |   |                |
|-----------------|------------|---|-------------|------------|---|----------------|
| ENSG00000199348 | 0.61420451 | 0 | 1.627939224 | 0.68670236 | 1 | RNU6-766P      |
| ENSG00000240922 | 0.61420451 | 0 | 1.627939224 | 0.68670236 | 1 | LSAMP-AS1      |
| ENSG00000242321 | 0.61420451 | 0 | 1.627939224 | 0.68670236 | 1 | RPL23AP40      |
| ENSG00000248374 | 0.61420451 | 0 | 1.627939224 | 0.68670236 | 1 | AC073358.1     |
| ENSG00000272797 | 0.61420451 | 0 | 1.627939224 | 0.68670236 | 1 | AC092954.1     |
| ENSG00000248545 | 0.61420451 | 0 | 1.627939224 | 0.68670236 | 1 | AC092436.2     |
| ENSG00000249036 | 0.61420451 | 0 | 1.627939224 | 0.68670236 | 1 | AC092674.1     |
| ENSG00000249973 | 0.61420451 | 0 | 1.627939224 | 0.68670236 | 1 | CHCHD2P7       |
| ENSG00000250149 | 0.61420451 | 0 | 1.627939224 | 0.68670236 | 1 | AC104664.1     |
| ENSG00000171557 | 0.61420451 | 0 | 1.627939224 | 0.68670236 | 1 | FGG            |
| ENSG00000248431 | 0.61420451 | 0 | 1.627939224 | 0.68670236 | 1 | AC021134.1     |
| ENSG00000248266 | 0.61420451 | 0 | 1.627939224 | 0.68670236 | 1 | AC108142.1     |
| ENSG00000286119 | 0.61420451 | 0 | 1.627939224 | 0.68670236 | 1 | AC114798.1     |
| ENSG00000248878 | 0.61420451 | 0 | 1.627939224 | 0.68670236 | 1 | AC022447.4     |
| ENSG00000253321 | 0.61420451 | 0 | 1.627939224 | 0.68670236 | 1 | AC099554.1     |
| ENSG00000251389 | 0.61420451 | 0 | 1.627939224 | 0.68670236 | 1 | YTHDF1P1       |
| ENSG00000239615 | 0.61420451 | 0 | 1.627939224 | 0.68670236 | 1 | AC104109.1     |
| ENSG00000254246 | 0.61420451 | 0 | 1.627939224 | 0.68670236 | 1 | AC011377.1     |
| ENSG00000249876 | 0.61420451 | 0 | 1.627939224 | 0.68670236 | 1 | AC010285.2     |
| ENSG00000237786 | 0.61420451 | 0 | 1.627939224 | 0.68670236 | 1 | GFOD1-AS1      |
| ENSG00000237346 | 0.61420451 | 0 | 1.627939224 | 0.68670236 | 1 | AL080313.2     |
| ENSG00000218806 | 0.61420451 | 0 | 1.627939224 | 0.68670236 | 1 | AL133264.1     |
| ENSG00000218048 | 0.61420451 | 0 | 1.627939224 | 0.68670236 | 1 | AL121949.1     |
| ENSG00000287268 | 0.61420451 | 0 | 1.627939224 | 0.68670236 | 1 | AL050350.1     |
| ENSG00000217612 | 0.61420451 | 0 | 1.627939224 | 0.68670236 | 1 | AL031119.1     |
| ENSG00000237268 | 0.61420451 | 0 | 1.627939224 | 0.68670236 | 1 | AC092447.7     |
| ENSG00000280225 | 0.61420451 | 0 | 1.627939224 | 0.68670236 | 1 | AC237221.2     |
| ENSG00000227968 | 0.61420451 | 0 | 1.627939224 | 0.68670236 | 1 | BUB3P1         |
| ENSG00000239021 | 0.61420451 | 0 | 1.627939224 | 0.68670236 | 1 | RNA5SP246      |
| ENSG00000146955 | 0.61420451 | 0 | 1.627939224 | 0.68670236 | 1 | RAB19          |
| ENSG00000270584 | 0.61420451 | 0 | 1.627939224 | 0.68670236 | 1 | AC093813.1     |
| ENSG00000288053 | 0.61420451 | 0 | 1.627939224 | 0.68670236 | 1 | AC231657.3     |
| ENSG00000223592 | 0.61420451 | 0 | 1.627939224 | 0.68670236 | 1 | FNDC3CP        |
| ENSG00000257529 | 0.61420451 | 0 | 1.627939224 | 0.68670236 | 1 | RPL36A-HNRNPH2 |
| ENSG00000208883 | 0.61420451 | 0 | 1.627939224 | 0.68670236 | 1 | SNORD96B       |
| ENSG00000239182 | 0.61420451 | 0 | 1.627939224 | 0.68670236 | 1 | RF00566        |
| ENSG00000183862 | 0.61420451 | 0 | 1.627939224 | 0.68670236 | 1 | CNGA2          |
| ENSG00000164825 | 0.61420451 | 0 | 1.627939224 | 0.68670236 | 1 | DEFB1          |
| ENSG00000271654 | 0.61420451 | 0 | 1.627939224 | 0.68670236 | 1 | AC025062.2     |
| ENSG00000253802 | 0.61420451 | 0 | 1.627939224 | 0.68670236 | 1 | SIRLNT         |
| ENSG00000242595 | 0.61420451 | 0 | 1.627939224 | 0.68670236 | 1 | RPL26P26       |
| ENSG00000253734 | 0.61420451 | 0 | 1.627939224 | 0.68670236 | 1 | LINC01289      |
| ENSG00000254205 | 0.61420451 | 0 | 1.627939224 | 0.68670236 | 1 | AC009686.1     |
| ENSG00000253292 | 0.61420451 | 0 | 1.627939224 | 0.68670236 | 1 | MIOXP1         |
| ENSG00000264615 | 0.61420451 | 0 | 1.627939224 | 0.68670236 | 1 | RN7SL592P      |
| ENSG00000220105 | 0.61420451 | 0 | 1.627939224 | 0.68670236 | 1 | AL353151.1     |
| ENSG00000214195 | 0.61420451 | 0 | 1.627939224 | 0.68670236 | 1 | HMG2P31        |
| ENSG00000232867 | 0.61420451 | 0 | 1.627939224 | 0.68670236 | 1 | AL355433.1     |
| ENSG00000224802 | 0.61420451 | 0 | 1.627939224 | 0.68670236 | 1 | TUBB4BP2       |
| ENSG00000287838 | 0.61420451 | 0 | 1.627939224 | 0.68670236 | 1 | AL953883.1     |
| ENSG00000227353 | 0.61420451 | 0 | 1.627939224 | 0.68670236 | 1 | RAB28P3        |

|                 |            |   |             |            |   |            |
|-----------------|------------|---|-------------|------------|---|------------|
| ENSG00000275676 | 0.61420451 | 0 | 1.627939224 | 0.68670236 | 1 | BX005040.1 |
| ENSG00000255158 | 0.61420451 | 0 | 1.627939224 | 0.68670236 | 1 | AC131934.1 |
| ENSG00000232268 | 0.61420451 | 0 | 1.627939224 | 0.68670236 | 1 | OR5211     |
| ENSG00000254934 | 0.61420451 | 0 | 1.627939224 | 0.68670236 | 1 | LINC00678  |
| ENSG00000281880 | 0.61420451 | 0 | 1.627939224 | 0.68670236 | 1 | PAUPAR     |
| ENSG00000254844 | 0.61420451 | 0 | 1.627939224 | 0.68670236 | 1 | AP000757.2 |
| ENSG00000182531 | 0.61420451 | 0 | 1.627939224 | 0.68670236 | 1 | OR7E115P   |
| ENSG00000168267 | 0.61420451 | 0 | 1.627939224 | 0.68670236 | 1 | PTF1A      |
| ENSG00000202047 | 0.61420451 | 0 | 1.627939224 | 0.68670236 | 1 | RNA5SP324  |
| ENSG00000252611 | 0.61420451 | 0 | 1.627939224 | 0.68670236 | 1 | RNU6-1121P |
| ENSG00000257105 | 0.61420451 | 0 | 1.627939224 | 0.68670236 | 1 | AC006581.1 |
| ENSG00000233719 | 0.61420451 | 0 | 1.627939224 | 0.68670236 | 1 | GOT2P3     |
| ENSG00000139144 | 0.61420451 | 0 | 1.627939224 | 0.68670236 | 1 | PIK3C2G    |
| ENSG00000256321 | 0.61420451 | 0 | 1.627939224 | 0.68670236 | 1 | AC087235.2 |
| ENSG00000256473 | 0.61420451 | 0 | 1.627939224 | 0.68670236 | 1 | AC087260.1 |
| ENSG00000255991 | 0.61420451 | 0 | 1.627939224 | 0.68670236 | 1 | AC121334.1 |
| ENSG00000275286 | 0.61420451 | 0 | 1.627939224 | 0.68670236 | 1 | AC025253.1 |
| ENSG00000272837 | 0.61420451 | 0 | 1.627939224 | 0.68670236 | 1 | OR10AE3P   |
| ENSG00000257005 | 0.61420451 | 0 | 1.627939224 | 0.68670236 | 1 | AC027667.1 |
| ENSG00000257564 | 0.61420451 | 0 | 1.627939224 | 0.68670236 | 1 | AC068993.1 |
| ENSG00000257127 | 0.61420451 | 0 | 1.627939224 | 0.68670236 | 1 | CLLU1      |
| ENSG00000199506 | 0.61420451 | 0 | 1.627939224 | 0.68670236 | 1 | RNU6-247P  |
| ENSG00000239215 | 0.61420451 | 0 | 1.627939224 | 0.68670236 | 1 | RPL27P12   |
| ENSG00000259862 | 0.61420451 | 0 | 1.627939224 | 0.68670236 | 1 | AC026336.2 |
| ENSG00000235205 | 0.61420451 | 0 | 1.627939224 | 0.68670236 | 1 | TATDN2P3   |
| ENSG00000225510 | 0.61420451 | 0 | 1.627939224 | 0.68670236 | 1 | PCDH8P1    |
| ENSG00000281167 | 0.61420451 | 0 | 1.627939224 | 0.68670236 | 1 | AL355390.2 |
| ENSG00000285902 | 0.61420451 | 0 | 1.627939224 | 0.68670236 | 1 | AL136442.1 |
| ENSG00000231222 | 0.61420451 | 0 | 1.627939224 | 0.68670236 | 1 | ARF4P4     |
| ENSG00000286614 | 0.61420451 | 0 | 1.627939224 | 0.68670236 | 1 | AL589182.3 |
| ENSG00000277710 | 0.61420451 | 0 | 1.627939224 | 0.68670236 | 1 | NBEAP5     |
| ENSG00000211776 | 0.61420451 | 0 | 1.627939224 | 0.68670236 | 1 | TRAV2      |
| ENSG00000211885 | 0.61420451 | 0 | 1.627939224 | 0.68670236 | 1 | TRAJ4      |
| ENSG00000243824 | 0.61420451 | 0 | 1.627939224 | 0.68670236 | 1 | RPL12P6    |
| ENSG00000287990 | 0.61420451 | 0 | 1.627939224 | 0.68670236 | 1 | AL358334.4 |
| ENSG00000258517 | 0.61420451 | 0 | 1.627939224 | 0.68670236 | 1 | AC004817.1 |
| ENSG00000287345 | 0.61420451 | 0 | 1.627939224 | 0.68670236 | 1 | AC183088.3 |
| ENSG00000259547 | 0.61420451 | 0 | 1.627939224 | 0.68670236 | 1 | CYCSP2     |
| ENSG00000259493 | 0.61420451 | 0 | 1.627939224 | 0.68670236 | 1 | AC023968.2 |
| ENSG00000286917 | 0.61420451 | 0 | 1.627939224 | 0.68670236 | 1 | AC022308.1 |
| ENSG00000184140 | 0.61420451 | 0 | 1.627939224 | 0.68670236 | 1 | OR4F6      |
| ENSG00000260612 | 0.61420451 | 0 | 1.627939224 | 0.68670236 | 1 | AC009097.3 |
| ENSG00000270313 | 0.61420451 | 0 | 1.627939224 | 0.68670236 | 1 | COX6CP16   |
| ENSG00000237377 | 0.61420451 | 0 | 1.627939224 | 0.68670236 | 1 | AC005703.2 |
| ENSG00000272815 | 0.61420451 | 0 | 1.627939224 | 0.68670236 | 1 | AC098850.4 |
| ENSG00000202361 | 0.61420451 | 0 | 1.627939224 | 0.68670236 | 1 | RF00019    |
| ENSG00000278972 | 0.61420451 | 0 | 1.627939224 | 0.68670236 | 1 | AC015920.1 |
| ENSG00000258609 | 0.61420451 | 0 | 1.627939224 | 0.68670236 | 1 | LINC-ROR   |
| ENSG00000287993 | 0.61420451 | 0 | 1.627939224 | 0.68670236 | 1 | AC090338.1 |
| ENSG00000271461 | 0.61420451 | 0 | 1.627939224 | 0.68670236 | 1 | AL109809.4 |
| ENSG00000225956 | 0.61420451 | 0 | 1.627939224 | 0.68670236 | 1 | AL050320.1 |

|                 |             |             |              |             |             |            |
|-----------------|-------------|-------------|--------------|-------------|-------------|------------|
| ENSG00000287241 | 0.61420451  | 0           | 1.627939224  | 0.68670236  | 1           | AL359511.3 |
| ENSG00000231265 | 0.61420451  | 0           | 1.627939224  | 0.68670236  | 1           | TRERNA1    |
| ENSG00000232294 | 0.61420451  | 0           | 1.627939224  | 0.68670236  | 1           | AL031674.1 |
| ENSG00000235686 | 0.61420451  | 0           | 1.627939224  | 0.68670236  | 1           | PPIAP20    |
| ENSG00000243488 | 0.61420451  | 0           | 1.627939224  | 0.68670236  | 1           | RN7SL337P  |
| ENSG00000271095 | 0.61420451  | 0           | 1.627939224  | 0.68670236  | 1           | BNIP3P28   |
| ENSG00000279882 | 0.61420451  | 0           | 1.627939224  | 0.68670236  | 1           | AC112702.1 |
| ENSG00000269792 | 0.61420451  | 0           | 1.627939224  | 0.68670236  | 1           | AC011500.3 |
| ENSG00000276588 | 0.61420451  | 0           | 1.627939224  | 0.68670236  | 1           | RN7SL322P  |
| ENSG00000178928 | 0.61420451  | 0           | 1.627939224  | 0.68670236  | 1           | TPRX1      |
| ENSG00000283583 | 0.61420451  | 0           | 1.627939224  | 0.68670236  | 1           | AC007326.3 |
| novel.498       | 13.22789137 | 18.5719133  | -0.494356129 | 0.686724606 | 0.778709999 | -          |
| ENSG00000236060 | 2.752566185 | 3.893559308 | -0.509148288 | 0.686725049 | 0.778709999 | HSPB1P1    |
| ENSG00000081791 | 1190.458681 | 1125.52301  | 0.080976606  | 0.686775927 | 0.778733703 | DELE1      |
| ENSG00000272836 | 19.15170143 | 15.72533339 | 0.28554955   | 0.687082488 | 0.779043557 | AL022328.1 |
| ENSG00000168389 | 201.2995665 | 231.8513393 | -0.203197749 | 0.687109161 | 0.779043557 | MFS2A      |
| ENSG00000179046 | 1.524157165 | 2.395427609 | -0.671305548 | 0.687235708 | 0.779153034 | TRIML2     |
| ENSG00000243517 | 17.35597146 | 21.10872366 | -0.284061203 | 0.687290022 | 0.779180611 | AC024940.3 |
| ENSG00000261634 | 0.923814062 | 0.336469917 | 1.253970734  | 0.687395585 | 1           | AC026992.2 |
| ENSG00000287402 | 0.923814062 | 0.336469917 | 1.253970734  | 0.687395585 | 1           | AL158167.1 |
| ENSG00000258640 | 0.923814062 | 0.336469917 | 1.253970734  | 0.687395585 | 1           | RPL21P5    |
| ENSG00000254420 | 0.923814062 | 0.336469917 | 1.253970734  | 0.687395585 | 1           | AP003086.2 |
| ENSG00000270140 | 0.923814062 | 0.336469917 | 1.253970734  | 0.687395585 | 1           | AC005520.3 |
| ENSG00000187556 | 14.28620255 | 11.54721072 | 0.308045912  | 0.687447678 | 0.779325339 | NANOS3     |
| ENSG00000278881 | 2.128261214 | 3.210006989 | -0.596604115 | 0.687723179 | 0.779595703 | FP325331.1 |
| ENSG00000205740 | 20.91902442 | 17.83388589 | 0.227451013  | 0.68774618  | 0.779595703 | AL359878.1 |
| ENSG00000279605 | 0.922560414 | 0.336469917 | 1.252310725  | 0.6878317   | 1           | AC067930.5 |
| ENSG00000278948 | 28.09123061 | 22.68122398 | 0.312884123  | 0.687857116 | 0.779687437 | AL031587.5 |
| ENSG00000166546 | 58.89659122 | 76.21595651 | -0.370167935 | 0.687918514 | 0.779723013 | BEAN1      |
| ENSG00000222383 | 1.480065645 | 0.672939833 | 1.116450103  | 0.68799676  | 1           | RNA5SP203  |
| ENSG00000234193 | 1.480065645 | 0.672939833 | 1.116450103  | 0.68799676  | 1           | AC013476.1 |
| ENSG00000275329 | 3.578096747 | 2.446178286 | 0.541076358  | 0.688061268 | 0.779850797 | AL138781.2 |
| ENSG00000261204 | 1.481319294 | 2.42610919  | -0.713869112 | 0.688178887 | 0.779937512 | AC004449.1 |
| ENSG00000230912 | 4.218770422 | 5.605434598 | -0.417066748 | 0.688197816 | 0.779937512 | AL021707.4 |
| ENSG00000238829 | 2.153476731 | 1.069617038 | 1.004538709  | 0.688250629 | 0.779953707 | RNU7-45P   |
| ENSG00000258082 | 4.488049402 | 3.139187216 | 0.50714643   | 0.688272147 | 0.779953707 | AL391832.3 |
| ENSG00000264808 | 1.203193503 | 2.079026788 | -0.796684038 | 0.688437916 | 0.780103083 | AC068025.1 |
| ENSG00000162073 | 301.7647011 | 337.734171  | -0.162579662 | 0.688480292 | 0.780103083 | PAQR4      |
| ENSG00000132589 | 1732.321388 | 1635.838889 | 0.082847665  | 0.688494041 | 0.780103083 | FLOT2      |
| ENSG00000248508 | 129.3749564 | 115.260581  | 0.168811218  | 0.688556612 | 0.780139956 | SRP14-AS1  |
| ENSG00000273056 | 1.511549406 | 0.713078025 | 1.080709349  | 0.68871084  | 1           | AL354694.1 |
| ENSG00000109861 | 3130.293349 | 2928.819216 | 0.095879583  | 0.688755687 | 0.780317942 | CTSC       |
| ENSG00000187531 | 417.753619  | 389.1324947 | 0.102125102  | 0.688820067 | 0.780317942 | SIRT7      |
| ENSG00000224597 | 350.1135243 | 325.4005751 | 0.10477829   | 0.688827915 | 0.780317942 | SVIL-AS1   |
| ENSG00000187553 | 1.850135422 | 0.713078025 | 1.37161361   | 0.688840016 | 1           | CYP26C1    |
| ENSG00000254305 | 1.850135422 | 0.713078025 | 1.37161361   | 0.688840016 | 1           | MRPL9P1    |
| ENSG00000256537 | 3.604565913 | 2.506385574 | 0.525011037  | 0.688860355 | 0.780317942 | SMIM10L1   |
| ENSG00000265452 | 10.28516897 | 8.05276876  | 0.344785007  | 0.688863874 | 0.780317942 | MIR3682    |
| ENSG00000189420 | 23.30800253 | 28.78128829 | -0.305615941 | 0.688956654 | 0.780337953 | ZFP92      |
| ENSG00000246777 | 7.318698164 | 5.318559484 | 0.454969068  | 0.688958835 | 0.780337953 | AC044802.1 |
| ENSG00000213967 | 23.90777617 | 28.59475866 | -0.25425083  | 0.689000589 | 0.780337953 | ZNF726     |

|                 |             |             |              |             |             |            |
|-----------------|-------------|-------------|--------------|-------------|-------------|------------|
| ENSG00000228330 | 3.270994492 | 1.682349583 | 0.946856155  | 0.689015874 | 0.780337953 | AL355355.1 |
| ENSG00000183735 | 603.5610683 | 642.5388637 | -0.089840865 | 0.689031715 | 0.780337953 | TBK1       |
| ENSG00000229190 | 0.909952655 | 0.387220594 | 1.235382798  | 0.689159678 | 1           | AC069542.1 |
| ENSG00000258553 | 0.909952655 | 0.387220594 | 1.235382798  | 0.689159678 | 1           | AL157911.1 |
| ENSG00000285895 | 0.909952655 | 0.387220594 | 1.235382798  | 0.689159678 | 1           | AP003557.2 |
| ENSG00000207494 | 0.909952655 | 0.387220594 | 1.235382798  | 0.689159678 | 1           | RF00019    |
| ENSG00000235937 | 0.909952655 | 0.387220594 | 1.235382798  | 0.689159678 | 1           | AC008280.1 |
| ENSG00000268173 | 0.909952655 | 0.387220594 | 1.235382798  | 0.689159678 | 1           | AC007192.1 |
| ENSG00000100083 | 1148.737211 | 1266.611892 | -0.140670057 | 0.689178907 | 0.780470629 | GGA1       |
| ENSG00000225334 | 0.909952655 | 1.936102971 | -1.077581843 | 0.689236712 | 0.780502071 | AL391811.1 |
| ENSG00000141452 | 368.8218464 | 342.5827465 | 0.106892817  | 0.689429858 | 0.780686766 | RMC1       |
| ENSG00000163705 | 1.233423615 | 2.415496705 | -0.98016921  | 0.689645751 | 0.780877961 | FANCD2OS   |
| ENSG00000259792 | 6.32056247  | 4.809640044 | 0.40829492   | 0.689658815 | 0.780877961 | AC104758.2 |
| ENSG00000161714 | 607.2039699 | 665.6688126 | -0.132624314 | 0.689826843 | 0.781034175 | PLCD3      |
| ENSG00000111875 | 385.0184864 | 415.7808419 | -0.111553145 | 0.6899145   | 0.781099382 | ASF1A      |
| ENSG00000237379 | 1.54052587  | 0.713078025 | 1.105111715  | 0.689976246 | 1           | CBX1P3     |
| ENSG00000284654 | 1.54052587  | 0.713078025 | 1.105111715  | 0.689976246 | 1           | AP000553.7 |
| ENSG00000127831 | 1.541779519 | 0.693008929 | 1.137987502  | 0.68999723  | 1           | VIL1       |
| ENSG00000239774 | 0.907445357 | 0.387220594 | 1.232042759  | 0.690038036 | 1           | AC125618.1 |
| ENSG00000232852 | 0.907445357 | 0.387220594 | 1.232042759  | 0.690038036 | 1           | CICP4      |
| ENSG00000287657 | 0.907445357 | 0.387220594 | 1.232042759  | 0.690038036 | 1           | AC068228.3 |
| ENSG00000233797 | 0.907445357 | 0.387220594 | 1.232042759  | 0.690038036 | 1           | UFL1-AS1   |
| ENSG00000183476 | 0.907445357 | 0.387220594 | 1.232042759  | 0.690038036 | 1           | SH2D7      |
| ENSG00000229044 | 1.186824798 | 2.099095884 | -0.822601627 | 0.690108394 | 0.781266803 | AL451070.1 |
| ENSG00000259744 | 1.81990531  | 3.068367442 | -0.764384423 | 0.690122517 | 0.781266803 | AC009269.4 |
| ENSG00000133812 | 1000.988497 | 929.1961419 | 0.107553533  | 0.690164965 | 0.781280814 | SBF2       |
| ENSG00000232149 | 1.773306493 | 2.802717299 | -0.658870153 | 0.690285247 | 0.78138293  | FERP1      |
| ENSG00000037637 | 525.6091373 | 566.8221948 | -0.108336101 | 0.690361589 | 0.781418766 | FBXO42     |
| ENSG00000137393 | 176.1001283 | 147.2394188 | 0.259165069  | 0.690377058 | 0.781418766 | RNF144B    |
| ENSG00000288093 | 6.134451935 | 4.311461484 | 0.506928824  | 0.690561143 | 0.781593076 | AL592295.5 |
| ENSG00000147050 | 392.9490966 | 345.4319636 | 0.186566541  | 0.690601393 | 0.781604582 | KDM6A      |
| ENSG00000135404 | 15932.88275 | 16893.59762 | -0.084457878 | 0.690659503 | 0.7816363   | CD63       |
| ENSG00000171004 | 31.88555364 | 22.99561702 | 0.467945342  | 0.690707007 | 0.781656013 | HS6ST2     |
| ENSG00000241438 | 2.391271949 | 3.638521651 | -0.597463007 | 0.690904016 | 0.781844908 | TDGF1P6    |
| ENSG00000279817 | 0.909952655 | 0.356539013 | 1.235388574  | 0.691027306 | 1           | AC073911.3 |
| ENSG00000207392 | 0.909952655 | 0.356539013 | 1.235388574  | 0.691027306 | 1           | SNORA20    |
| ENSG00000251009 | 0.615458159 | 1.345879667 | -1.14739147  | 0.691498313 | 1           | AC133961.1 |
| ENSG00000257545 | 2.387511003 | 1.386017859 | 0.773828503  | 0.691590649 | 0.782587833 | AC079385.1 |
| ENSG00000143612 | 2959.253772 | 3144.783874 | -0.08778889  | 0.691626523 | 0.782594342 | C1orf43    |
| novel.128       | 0.601596751 | 0           | 1.601808011  | 0.691639334 | 1           | -          |
| ENSG00000004848 | 0.601596751 | 0           | 1.601808011  | 0.691639334 | 1           | ARX        |
| novel.121       | 0.601596751 | 0           | 1.601808011  | 0.691639334 | 1           | -          |
| ENSG00000163221 | 0.601596751 | 0           | 1.601808011  | 0.691639334 | 1           | S100A12    |
| ENSG00000064218 | 0.601596751 | 0           | 1.601808011  | 0.691639334 | 1           | DMRT3      |
| ENSG00000266954 | 0.601596751 | 0           | 1.601808011  | 0.691639334 | 1           | AP001010.1 |
| ENSG00000198547 | 0.601596751 | 0           | 1.601808011  | 0.691639334 | 1           | C20orf203  |
| ENSG00000285746 | 0.601596751 | 0           | 1.601808011  | 0.691639334 | 1           | AL450447.1 |
| ENSG00000281641 | 0.601596751 | 0           | 1.601808011  | 0.691639334 | 1           | SAMD12-AS1 |
| ENSG00000036565 | 0.601596751 | 0           | 1.601808011  | 0.691639334 | 1           | SLC18A1    |
| ENSG00000262412 | 0.601596751 | 0           | 1.601808011  | 0.691639334 | 1           | AL160291.1 |
| ENSG00000287713 | 0.601596751 | 0           | 1.601808011  | 0.691639334 | 1           | AC006517.2 |

|                 |             |   |             |             |   |            |
|-----------------|-------------|---|-------------|-------------|---|------------|
| ENSG00000273160 | 0.601596751 | 0 | 1.601808011 | 0.691639334 | 1 | AL359962.2 |
| ENSG00000287936 | 0.601596751 | 0 | 1.601808011 | 0.691639334 | 1 | AL391425.1 |
| ENSG00000077009 | 0.601596751 | 0 | 1.601808011 | 0.691639334 | 1 | NMRK2      |
| ENSG00000081248 | 0.601596751 | 0 | 1.601808011 | 0.691639334 | 1 | CACNA1S    |
| ENSG00000183571 | 0.601596751 | 0 | 1.601808011 | 0.691639334 | 1 | PGPEP1L    |
| ENSG00000252569 | 0.601596751 | 0 | 1.601808011 | 0.691639334 | 1 | RNU6-1153P |
| ENSG00000251372 | 0.601596751 | 0 | 1.601808011 | 0.691639334 | 1 | LINC00499  |
| ENSG00000237065 | 0.601596751 | 0 | 1.601808011 | 0.691639334 | 1 | NANOGP4    |
| ENSG00000253564 | 0.601596751 | 0 | 1.601808011 | 0.691639334 | 1 | AC100823.2 |
| ENSG00000258794 | 0.601596751 | 0 | 1.601808011 | 0.691639334 | 1 | DUX4L27    |
| ENSG00000259415 | 0.601596751 | 0 | 1.601808011 | 0.691639334 | 1 | AC012291.1 |
| ENSG00000263508 | 0.601596751 | 0 | 1.601808011 | 0.691639334 | 1 | AC015908.2 |
| ENSG00000201861 | 0.601596751 | 0 | 1.601808011 | 0.691639334 | 1 | RNA5SP298  |
| novel.542       | 0.601596751 | 0 | 1.601808011 | 0.691639334 | 1 | -          |
| ENSG00000287244 | 0.601596751 | 0 | 1.601808011 | 0.691639334 | 1 | AL020997.5 |
| ENSG00000199377 | 0.601596751 | 0 | 1.601808011 | 0.691639334 | 1 | RNU5F-1    |
| ENSG00000278486 | 0.601596751 | 0 | 1.601808011 | 0.691639334 | 1 | YRDCP1     |
| ENSG00000276063 | 0.601596751 | 0 | 1.601808011 | 0.691639334 | 1 | AL391262.1 |
| ENSG00000212593 | 0.601596751 | 0 | 1.601808011 | 0.691639334 | 1 | RF00072    |
| ENSG00000266840 | 0.601596751 | 0 | 1.601808011 | 0.691639334 | 1 | AC068254.1 |
| ENSG00000268496 | 0.601596751 | 0 | 1.601808011 | 0.691639334 | 1 | AC245884.9 |
| ENSG00000287987 | 0.601596751 | 0 | 1.601808011 | 0.691639334 | 1 | AL390839.2 |
| ENSG00000265145 | 0.601596751 | 0 | 1.601808011 | 0.691639334 | 1 | SNORD53    |
| ENSG00000284158 | 0.601596751 | 0 | 1.601808011 | 0.691639334 | 1 | MIR6822    |
| ENSG00000243384 | 0.601596751 | 0 | 1.601808011 | 0.691639334 | 1 | AC119424.1 |
| ENSG00000278685 | 0.601596751 | 0 | 1.601808011 | 0.691639334 | 1 | IQCA1L     |
| ENSG00000230804 | 0.601596751 | 0 | 1.601808011 | 0.691639334 | 1 | C2orf27AP3 |
| ENSG00000285840 | 0.601596751 | 0 | 1.601808011 | 0.691639334 | 1 | AL353648.1 |
| ENSG00000270343 | 0.601596751 | 0 | 1.601808011 | 0.691639334 | 1 | UNGP3      |
| ENSG00000284671 | 0.601596751 | 0 | 1.601808011 | 0.691639334 | 1 | AC009093.9 |
| ENSG00000279887 | 0.601596751 | 0 | 1.601808011 | 0.691639334 | 1 | AC046158.4 |
| ENSG00000244676 | 0.601596751 | 0 | 1.601808011 | 0.691639334 | 1 | AL109761.1 |
| ENSG00000206102 | 0.601596751 | 0 | 1.601808011 | 0.691639334 | 1 | KRTAP19-8  |
| ENSG00000201801 | 0.601596751 | 0 | 1.601808011 | 0.691639334 | 1 | RNU5E-4P   |
| ENSG00000285898 | 0.601596751 | 0 | 1.601808011 | 0.691639334 | 1 | AC007317.1 |
| ENSG00000201076 | 0.601596751 | 0 | 1.601808011 | 0.691639334 | 1 | RNU4-51P   |
| ENSG00000232144 | 0.601596751 | 0 | 1.601808011 | 0.691639334 | 1 | PSAT1P2    |
| ENSG00000250425 | 0.601596751 | 0 | 1.601808011 | 0.691639334 | 1 | ORTE35P    |
| ENSG00000180613 | 0.601596751 | 0 | 1.601808011 | 0.691639334 | 1 | GSX2       |
| ENSG00000227541 | 0.601596751 | 0 | 1.601808011 | 0.691639334 | 1 | SFR1P1     |
| ENSG00000169551 | 0.601596751 | 0 | 1.601808011 | 0.691639334 | 1 | CT55       |
| ENSG00000260390 | 0.601596751 | 0 | 1.601808011 | 0.691639334 | 1 | AL360014.1 |
| ENSG00000255928 | 0.601596751 | 0 | 1.601808011 | 0.691639334 | 1 | AP002993.1 |
| ENSG00000201428 | 0.601596751 | 0 | 1.601808011 | 0.691639334 | 1 | RN7SKP71   |
| ENSG00000205240 | 0.601596751 | 0 | 1.601808011 | 0.691639334 | 1 | ORTE36P    |
| ENSG00000241185 | 0.601596751 | 0 | 1.601808011 | 0.691639334 | 1 | AC005410.1 |
| ENSG00000276790 | 0.601596751 | 0 | 1.601808011 | 0.691639334 | 1 | AC068234.3 |
| ENSG00000225297 | 0.601596751 | 0 | 1.601808011 | 0.691639334 | 1 | AC126124.1 |
| ENSG00000233432 | 0.601596751 | 0 | 1.601808011 | 0.691639334 | 1 | MTIF2P1    |
| ENSG00000272971 | 0.601596751 | 0 | 1.601808011 | 0.691639334 | 1 | AL365181.4 |
| ENSG00000282440 | 0.601596751 | 0 | 1.601808011 | 0.691639334 | 1 | AC074099.1 |

|                 |             |             |              |             |             |            |
|-----------------|-------------|-------------|--------------|-------------|-------------|------------|
| ENSG00000287524 | 0.601596751 | 0           | 1.601808011  | 0.691639334 | 1           | AC007736.1 |
| ENSG00000240203 | 0.601596751 | 0           | 1.601808011  | 0.691639334 | 1           | RN7SL567P  |
| ENSG00000236722 | 0.601596751 | 0           | 1.601808011  | 0.691639334 | 1           | AC116036.1 |
| ENSG00000189002 | 0.601596751 | 0           | 1.601808011  | 0.691639334 | 1           | PROS2P     |
| ENSG00000264623 | 0.601596751 | 0           | 1.601808011  | 0.691639334 | 1           | MIR4796    |
| ENSG00000264585 | 0.601596751 | 0           | 1.601808011  | 0.691639334 | 1           | MIR4449    |
| ENSG00000242134 | 0.601596751 | 0           | 1.601808011  | 0.691639334 | 1           | RPL5P13    |
| ENSG00000249623 | 0.601596751 | 0           | 1.601808011  | 0.691639334 | 1           | AC079858.1 |
| ENSG00000249230 | 0.601596751 | 0           | 1.601808011  | 0.691639334 | 1           | CDH12P2    |
| ENSG00000212336 | 0.601596751 | 0           | 1.601808011  | 0.691639334 | 1           | RNA5SP210  |
| ENSG00000213117 | 0.601596751 | 0           | 1.601808011  | 0.691639334 | 1           | AL021939.1 |
| ENSG00000233044 | 0.601596751 | 0           | 1.601808011  | 0.691639334 | 1           | AL049820.1 |
| ENSG00000286925 | 0.601596751 | 0           | 1.601808011  | 0.691639334 | 1           | AL731684.2 |
| ENSG00000277120 | 0.601596751 | 0           | 1.601808011  | 0.691639334 | 1           | MIR6089    |
| ENSG00000182888 | 0.601596751 | 0           | 1.601808011  | 0.691639334 | 1           | AC007685.1 |
| ENSG00000253263 | 0.601596751 | 0           | 1.601808011  | 0.691639334 | 1           | AP003354.1 |
| ENSG00000244052 | 0.601596751 | 0           | 1.601808011  | 0.691639334 | 1           | RPL5P24    |
| ENSG00000272043 | 0.601596751 | 0           | 1.601808011  | 0.691639334 | 1           | AC016405.2 |
| ENSG00000150676 | 0.601596751 | 0           | 1.601808011  | 0.691639334 | 1           | CCDC83     |
| ENSG00000233643 | 0.601596751 | 0           | 1.601808011  | 0.691639334 | 1           | LINC02625  |
| ENSG00000226701 | 0.601596751 | 0           | 1.601808011  | 0.691639334 | 1           | RPL15P14   |
| ENSG00000282952 | 0.601596751 | 0           | 1.601808011  | 0.691639334 | 1           | AL583852.1 |
| ENSG00000212325 | 0.601596751 | 0           | 1.601808011  | 0.691639334 | 1           | RF00019    |
| ENSG00000256155 | 0.601596751 | 0           | 1.601808011  | 0.691639334 | 1           | LINC02598  |
| ENSG00000212125 | 0.601596751 | 0           | 1.601808011  | 0.691639334 | 1           | TAS2R15P   |
| ENSG00000257643 | 0.601596751 | 0           | 1.601808011  | 0.691639334 | 1           | AC084824.2 |
| ENSG00000278011 | 0.601596751 | 0           | 1.601808011  | 0.691639334 | 1           | AC024941.1 |
| ENSG00000259411 | 0.601596751 | 0           | 1.601808011  | 0.691639334 | 1           | HNRNPA1P45 |
| ENSG00000243871 | 0.601596751 | 0           | 1.601808011  | 0.691639334 | 1           | RN7SL487P  |
| ENSG00000277142 | 0.601596751 | 0           | 1.601808011  | 0.691639334 | 1           | LINC00235  |
| ENSG00000262316 | 0.601596751 | 0           | 1.601808011  | 0.691639334 | 1           | AC025283.1 |
| ENSG00000267129 | 0.601596751 | 0           | 1.601808011  | 0.691639334 | 1           | OR1AC1P    |
| ENSG00000242889 | 0.601596751 | 0           | 1.601808011  | 0.691639334 | 1           | RN7SL449P  |
| ENSG00000214049 | 0.601596751 | 0           | 1.601808011  | 0.691639334 | 1           | UCA1       |
| ENSG00000267467 | 0.601596751 | 0           | 1.601808011  | 0.691639334 | 1           | APOC4      |
| ENSG00000227494 | 0.601596751 | 0           | 1.601808011  | 0.691639334 | 1           | USP9YP14   |
| ENSG00000201209 | 0.601596751 | 0           | 1.601808011  | 0.691639334 | 1           | RF00150    |
| ENSG00000199248 | 0.601596751 | 0           | 1.601808011  | 0.691639334 | 1           | RNU6-28P   |
| ENSG00000263361 | 3.532751578 | 1.782695063 | 0.987361574  | 0.691818532 | 0.782777514 | MIR378H    |
| ENSG00000259512 | 1.480065645 | 2.679862578 | -0.838522191 | 0.691868618 | 0.782800094 | HNRNPA1P5  |
| ENSG00000216990 | 0.907445357 | 0.356539013 | 1.232039843  | 0.691907694 | 1           | HSPD1P10   |
| ENSG00000220506 | 0.907445357 | 0.356539013 | 1.232039843  | 0.691907694 | 1           | AL136310.1 |
| ENSG00000260733 | 0.907445357 | 0.356539013 | 1.232039843  | 0.691907694 | 1           | AC046158.1 |
| ENSG00000253535 | 0.907445357 | 0.356539013 | 1.232039843  | 0.691907694 | 1           | AC120193.1 |
| ENSG00000153923 | 0.907445357 | 0.356539013 | 1.232039843  | 0.691907694 | 1           | CLCA3P     |
| ENSG00000236172 | 0.907445357 | 0.356539013 | 1.232039843  | 0.691907694 | 1           | MIR7515HG  |
| ENSG00000226859 | 0.907445357 | 0.356539013 | 1.232039843  | 0.691907694 | 1           | LINC02051  |
| ENSG00000207044 | 0.907445357 | 0.356539013 | 1.232039843  | 0.691907694 | 1           | RNU6-1226P |
| ENSG00000124532 | 419.110242  | 451.7414778 | -0.108773132 | 0.691929707 | 0.782835121 | MRS2       |
| ENSG00000260293 | 9.727663738 | 12.09511248 | -0.318168728 | 0.69206068  | 0.782949206 | AC106820.4 |
| ENSG00000244757 | 2.666890443 | 1.345879667 | 0.972790987  | 0.692113508 | 0.782974878 | AL137024.1 |

|                 |             |   |             |            |   |            |
|-----------------|-------------|---|-------------|------------|---|------------|
| ENSG00000224222 | 0.600343103 | 0 | 1.599208938 | 0.69213095 | 1 | LINC02636  |
| ENSG00000198128 | 0.600343103 | 0 | 1.599208938 | 0.69213095 | 1 | OR2L3      |
| ENSG00000227094 | 0.600343103 | 0 | 1.599208938 | 0.69213095 | 1 | AL512785.1 |
| ENSG00000269356 | 0.600343103 | 0 | 1.599208938 | 0.69213095 | 1 | AL356740.2 |
| ENSG00000287083 | 0.600343103 | 0 | 1.599208938 | 0.69213095 | 1 | AC108169.1 |
| ENSG00000253298 | 0.600343103 | 0 | 1.599208938 | 0.69213095 | 1 | LINC01845  |
| ENSG00000239627 | 0.600343103 | 0 | 1.599208938 | 0.69213095 | 1 | RPL12P20   |
| ENSG00000251215 | 0.600343103 | 0 | 1.599208938 | 0.69213095 | 1 | GOLGA5P1   |
| ENSG00000266717 | 0.600343103 | 0 | 1.599208938 | 0.69213095 | 1 | AC134407.1 |
| ENSG00000231758 | 0.600343103 | 0 | 1.599208938 | 0.69213095 | 1 | AC092652.1 |
| ENSG00000287447 | 0.600343103 | 0 | 1.599208938 | 0.69213095 | 1 | AC099501.1 |
| ENSG00000225152 | 0.600343103 | 0 | 1.599208938 | 0.69213095 | 1 | AL160290.1 |
| ENSG00000286068 | 0.600343103 | 0 | 1.599208938 | 0.69213095 | 1 | AC010974.2 |
| ENSG00000249125 | 0.600343103 | 0 | 1.599208938 | 0.69213095 | 1 | AC093821.1 |
| ENSG00000244245 | 0.600343103 | 0 | 1.599208938 | 0.69213095 | 1 | AC133134.1 |
| ENSG00000243711 | 0.600343103 | 0 | 1.599208938 | 0.69213095 | 1 | RPL21P116  |
| ENSG00000273982 | 0.600343103 | 0 | 1.599208938 | 0.69213095 | 1 | AC005746.3 |
| ENSG00000287857 | 0.600343103 | 0 | 1.599208938 | 0.69213095 | 1 | AL592546.2 |
| ENSG00000279588 | 0.600343103 | 0 | 1.599208938 | 0.69213095 | 1 | AC087762.2 |
| ENSG00000101327 | 0.600343103 | 0 | 1.599208938 | 0.69213095 | 1 | PDYN       |
| ENSG00000284686 | 0.600343103 | 0 | 1.599208938 | 0.69213095 | 1 | AC119674.2 |
| ENSG00000270575 | 0.600343103 | 0 | 1.599208938 | 0.69213095 | 1 | AL160281.1 |
| ENSG00000174429 | 0.600343103 | 0 | 1.599208938 | 0.69213095 | 1 | ABRA       |
| ENSG00000227583 | 0.600343103 | 0 | 1.599208938 | 0.69213095 | 1 | RPS3AP37   |
| ENSG00000259476 | 0.600343103 | 0 | 1.599208938 | 0.69213095 | 1 | AC018904.2 |
| ENSG00000235711 | 0.600343103 | 0 | 1.599208938 | 0.69213095 | 1 | ANKRD34C   |
| ENSG00000287983 | 0.600343103 | 0 | 1.599208938 | 0.69213095 | 1 | AL035251.1 |
| novel.821       | 0.600343103 | 0 | 1.599208938 | 0.69213095 | 1 | -          |
| ENSG00000286942 | 0.600343103 | 0 | 1.599208938 | 0.69213095 | 1 | AC017104.6 |
| ENSG00000204909 | 0.600343103 | 0 | 1.599208938 | 0.69213095 | 1 | SPINK9     |
| ENSG00000286644 | 0.600343103 | 0 | 1.599208938 | 0.69213095 | 1 | AC008443.9 |
| ENSG00000222533 | 0.600343103 | 0 | 1.599208938 | 0.69213095 | 1 | RNU6-705P  |
| ENSG00000107014 | 0.600343103 | 0 | 1.599208938 | 0.69213095 | 1 | RLN2       |
| ENSG00000259774 | 0.600343103 | 0 | 1.599208938 | 0.69213095 | 1 | AC243562.3 |
| ENSG00000267529 | 0.600343103 | 0 | 1.599208938 | 0.69213095 | 1 | AP005131.4 |
| ENSG00000231702 | 0.600343103 | 0 | 1.599208938 | 0.69213095 | 1 | AL645608.3 |
| ENSG00000264881 | 0.600343103 | 0 | 1.599208938 | 0.69213095 | 1 | AL358013.1 |
| ENSG00000224683 | 0.600343103 | 0 | 1.599208938 | 0.69213095 | 1 | RPL36AP29  |
| ENSG00000283380 | 0.600343103 | 0 | 1.599208938 | 0.69213095 | 1 | AL807742.1 |
| ENSG00000283463 | 0.600343103 | 0 | 1.599208938 | 0.69213095 | 1 | HSFX4      |
| ENSG00000225460 | 0.600343103 | 0 | 1.599208938 | 0.69213095 | 1 | AL590233.1 |
| ENSG00000255542 | 0.600343103 | 0 | 1.599208938 | 0.69213095 | 1 | AC090625.2 |
| ENSG00000228566 | 0.600343103 | 0 | 1.599208938 | 0.69213095 | 1 | AC013287.1 |
| ENSG00000207223 | 0.600343103 | 0 | 1.599208938 | 0.69213095 | 1 | RF00019    |
| ENSG00000279600 | 0.600343103 | 0 | 1.599208938 | 0.69213095 | 1 | AC015804.1 |
| ENSG00000271283 | 0.600343103 | 0 | 1.599208938 | 0.69213095 | 1 | AC011458.2 |
| ENSG00000227777 | 0.600343103 | 0 | 1.599208938 | 0.69213095 | 1 | AL031736.1 |
| ENSG00000233920 | 0.600343103 | 0 | 1.599208938 | 0.69213095 | 1 | AL162595.2 |
| ENSG00000226878 | 0.600343103 | 0 | 1.599208938 | 0.69213095 | 1 | GSTM3P2    |
| ENSG00000244380 | 0.600343103 | 0 | 1.599208938 | 0.69213095 | 1 | AC134772.1 |
| ENSG00000284624 | 0.600343103 | 0 | 1.599208938 | 0.69213095 | 1 | AC092902.4 |

|                 |             |   |             |            |   |             |
|-----------------|-------------|---|-------------|------------|---|-------------|
| ENSG00000249784 | 0.600343103 | 0 | 1.599208938 | 0.69213095 | 1 | SCARNA22    |
| ENSG00000241612 | 0.600343103 | 0 | 1.599208938 | 0.69213095 | 1 | AC114728.1  |
| ENSG00000241230 | 0.600343103 | 0 | 1.599208938 | 0.69213095 | 1 | RN7SL801P   |
| ENSG00000234484 | 0.600343103 | 0 | 1.599208938 | 0.69213095 | 1 | AL032821.1  |
| ENSG00000237818 | 0.600343103 | 0 | 1.599208938 | 0.69213095 | 1 | RPS3AP29    |
| ENSG00000253475 | 0.600343103 | 0 | 1.599208938 | 0.69213095 | 1 | AC103769.1  |
| ENSG00000257345 | 0.600343103 | 0 | 1.599208938 | 0.69213095 | 1 | LINC02413   |
| ENSG00000280296 | 0.600343103 | 0 | 1.599208938 | 0.69213095 | 1 | AL137058.3  |
| ENSG00000261279 | 0.600343103 | 0 | 1.599208938 | 0.69213095 | 1 | ULK4P1      |
| ENSG00000221634 | 0.600343103 | 0 | 1.599208938 | 0.69213095 | 1 | MIR1276     |
| ENSG00000260616 | 0.600343103 | 0 | 1.599208938 | 0.69213095 | 1 | AC007728.1  |
| ENSG00000267298 | 0.600343103 | 0 | 1.599208938 | 0.69213095 | 1 | AC006116.5  |
| ENSG00000237349 | 0.600343103 | 0 | 1.599208938 | 0.69213095 | 1 | BX679664.2  |
| ENSG00000226498 | 0.600343103 | 0 | 1.599208938 | 0.69213095 | 1 | RPSAP21     |
| ENSG00000252756 | 0.600343103 | 0 | 1.599208938 | 0.69213095 | 1 | RNU6-577P   |
| ENSG00000224061 | 0.600343103 | 0 | 1.599208938 | 0.69213095 | 1 | AC092106.1  |
| ENSG00000230958 | 0.600343103 | 0 | 1.599208938 | 0.69213095 | 1 | AC093166.3  |
| ENSG00000243179 | 0.600343103 | 0 | 1.599208938 | 0.69213095 | 1 | AC110769.1  |
| ENSG00000232953 | 0.600343103 | 0 | 1.599208938 | 0.69213095 | 1 | HSPA8P18    |
| ENSG00000187054 | 0.600343103 | 0 | 1.599208938 | 0.69213095 | 1 | TMPRSS11A   |
| ENSG00000206786 | 0.600343103 | 0 | 1.599208938 | 0.69213095 | 1 | RNU6-701P   |
| ENSG00000199715 | 0.600343103 | 0 | 1.599208938 | 0.69213095 | 1 | RF00019     |
| ENSG00000286014 | 0.600343103 | 0 | 1.599208938 | 0.69213095 | 1 | AC211486.6  |
| ENSG00000215120 | 0.600343103 | 0 | 1.599208938 | 0.69213095 | 1 | AL590763.1  |
| ENSG00000200906 | 0.600343103 | 0 | 1.599208938 | 0.69213095 | 1 | RNU6-854P   |
| ENSG00000253562 | 0.600343103 | 0 | 1.599208938 | 0.69213095 | 1 | AC107909.2  |
| ENSG00000274772 | 0.600343103 | 0 | 1.599208938 | 0.69213095 | 1 | RF00017     |
| ENSG00000170827 | 0.600343103 | 0 | 1.599208938 | 0.69213095 | 1 | CELP        |
| ENSG00000129744 | 0.600343103 | 0 | 1.599208938 | 0.69213095 | 1 | ART1        |
| ENSG00000280502 | 0.600343103 | 0 | 1.599208938 | 0.69213095 | 1 | RF00017     |
| ENSG00000252479 | 0.600343103 | 0 | 1.599208938 | 0.69213095 | 1 | RNA5SP309   |
| ENSG00000277952 | 0.600343103 | 0 | 1.599208938 | 0.69213095 | 1 | AC092745.3  |
| ENSG00000166111 | 0.600343103 | 0 | 1.599208938 | 0.69213095 | 1 | SVOP        |
| ENSG00000227105 | 0.600343103 | 0 | 1.599208938 | 0.69213095 | 1 | PARP1P1     |
| ENSG00000260385 | 0.600343103 | 0 | 1.599208938 | 0.69213095 | 1 | AL356961.1  |
| ENSG00000228304 | 0.600343103 | 0 | 1.599208938 | 0.69213095 | 1 | OR4K6P      |
| ENSG00000211777 | 0.600343103 | 0 | 1.599208938 | 0.69213095 | 1 | TRAV3       |
| ENSG00000259519 | 0.600343103 | 0 | 1.599208938 | 0.69213095 | 1 | AC051619.4  |
| ENSG00000276696 | 0.600343103 | 0 | 1.599208938 | 0.69213095 | 1 | RF00019     |
| ENSG00000273553 | 0.600343103 | 0 | 1.599208938 | 0.69213095 | 1 | AC016597.2  |
| ENSG00000260467 | 0.600343103 | 0 | 1.599208938 | 0.69213095 | 1 | AC018552.2  |
| ENSG00000174292 | 0.600343103 | 0 | 1.599208938 | 0.69213095 | 1 | TNK1        |
| ENSG00000206734 | 0.600343103 | 0 | 1.599208938 | 0.69213095 | 1 | RF00019     |
| ENSG00000260779 | 0.600343103 | 0 | 1.599208938 | 0.69213095 | 1 | AP001180.1  |
| ENSG00000264843 | 0.600343103 | 0 | 1.599208938 | 0.69213095 | 1 | AP001180.4  |
| ENSG00000240983 | 0.600343103 | 0 | 1.599208938 | 0.69213095 | 1 | AC090311.1  |
| ENSG00000264845 | 0.600343103 | 0 | 1.599208938 | 0.69213095 | 1 | AC119868.1  |
| ENSG00000277112 | 0.600343103 | 0 | 1.599208938 | 0.69213095 | 1 | ANKRD20A21P |
| ENSG00000268174 | 0.600343103 | 0 | 1.599208938 | 0.69213095 | 1 | BNIP3P22    |
| ENSG00000208002 | 0.600343103 | 0 | 1.599208938 | 0.69213095 | 1 | MIR643      |
| ENSG00000285314 | 0.600343103 | 0 | 1.599208938 | 0.69213095 | 1 | AC002470.2  |



|                 |             |             |              |             |             |            |
|-----------------|-------------|-------------|--------------|-------------|-------------|------------|
| ENSG00000185264 | 0.600343103 | 0           | 1.599208938  | 0.69213095  | 1           | TEX33      |
| ENSG00000187005 | 0.600343103 | 0           | 1.599208938  | 0.69213095  | 1           | KRTAP21-1  |
| ENSG00000233036 | 0.600343103 | 0           | 1.599208938  | 0.69213095  | 1           | KRTAP8-2P  |
| ENSG00000225886 | 29.94046839 | 33.49901199 | -0.164267748 | 0.692160696 | 0.782982087 | AL445490.1 |
| ENSG00000215712 | 476.9686238 | 448.326927  | 0.088857049  | 0.692180153 | 0.782982087 | TMEM242    |
| ENSG00000284395 | 0.909952655 | 0.336469917 | 1.23539239   | 0.692271561 | 1           | AL032819.3 |
| ENSG00000278818 | 0.909952655 | 0.336469917 | 1.23539239   | 0.692271561 | 1           | RF00017    |
| ENSG00000091436 | 1907.468227 | 1758.564429 | 0.11734483   | 0.692305579 | 0.783089871 | MAP3K20    |
| ENSG00000246145 | 1.49643435  | 0.713078025 | 1.068033235  | 0.692325121 | 1           | RRS1-AS1   |
| ENSG00000166450 | 69.21624944 | 60.2405126  | 0.197781191  | 0.692460099 | 0.783222591 | PRTG       |
| ENSG00000287584 | 3.357923882 | 2.261960402 | 0.587862924  | 0.692483205 | 0.783222591 | AC004837.4 |
| ENSG00000100084 | 266.6325265 | 283.9309161 | -0.091326472 | 0.692624592 | 0.783348404 | HIRA       |
| ENSG00000263177 | 3.065936683 | 4.411806964 | -0.522450753 | 0.692732095 | 0.783435884 | MTND1P8    |
| ENSG00000267270 | 27.42952964 | 31.56979709 | -0.198701601 | 0.692828192 | 0.783508449 | PARD6G-AS1 |
| ENSG00000276390 | 3.04831433  | 2.140389951 | 0.504245888  | 0.692856573 | 0.783508449 | AC004241.3 |
| ENSG00000267457 | 1.493927053 | 0.713078025 | 1.065934428  | 0.692924563 | 1           | AC004223.2 |
| ENSG00000220666 | 1.493927053 | 0.713078025 | 1.065934428  | 0.692924563 | 1           | RCC2P7     |
| ENSG00000285875 | 2.752566185 | 1.702418679 | 0.668953648  | 0.693037403 | 0.783678829 | AL035446.2 |
| ENSG00000101335 | 5452.084726 | 5947.406615 | -0.125498511 | 0.693084478 | 0.783697951 | MYL9       |
| ENSG00000251377 | 0.907445357 | 0.336469917 | 1.232037914  | 0.693153314 | 1           | AC079340.2 |
| ENSG00000204439 | 0.907445357 | 0.336469917 | 1.232037914  | 0.693153314 | 1           | C6orf47    |
| ENSG00000251013 | 0.907445357 | 0.336469917 | 1.232037914  | 0.693153314 | 1           | GAPDHP62   |
| ENSG00000223023 | 0.907445357 | 0.336469917 | 1.232037914  | 0.693153314 | 1           | RF00019    |
| ENSG00000258820 | 1.526664462 | 0.713078025 | 1.093542348  | 0.6932039   | 1           | AF111167.1 |
| ENSG00000254843 | 1.526664462 | 0.713078025 | 1.093542348  | 0.6932039   | 1           | XIAPP2     |
| ENSG00000267422 | 12.1680418  | 14.41959192 | -0.245084552 | 0.693299924 | 0.783907448 | AC016582.2 |
| ENSG00000100058 | 284.7686556 | 309.9982742 | -0.121655344 | 0.693355545 | 0.783936221 | CRYBB2P1   |
| ENSG00000272533 | 1.789675198 | 1.080229524 | 0.734875507  | 0.693394158 | 0.783945762 | SNORA28    |
| ENSG00000182676 | 2.429095225 | 4.005673149 | -0.71959703  | 0.69345162  | 0.783976612 | PPP1R27    |
| ENSG00000246214 | 3.373038938 | 2.200597239 | 0.620922816  | 0.693669291 | 0.784188576 | AC024588.1 |
| ENSG00000228158 | 6.394884102 | 4.737664395 | 0.436433847  | 0.694072449 | 0.784610203 | TLE1P1     |
| ENSG00000235214 | 3.057161142 | 1.548882377 | 0.995938998  | 0.694108306 | 0.784616598 | FAM83C-AS1 |
| ENSG00000224138 | 15.07781333 | 18.47254812 | -0.290322579 | 0.694188932 | 0.784673597 | AC000123.1 |
| ENSG00000150456 | 162.1751922 | 175.2220997 | -0.113244657 | 0.694282895 | 0.784711872 | EEF1AKMT1  |
| ENSG00000140025 | 101.7708838 | 111.1872174 | -0.129490252 | 0.6942832   | 0.784711872 | EFCAB11    |
| ENSG00000260494 | 1.521649867 | 0.713078025 | 1.08936343   | 0.69437143  | 1           | AC002310.3 |
| ENSG00000170365 | 270.2757703 | 291.9197532 | -0.111582272 | 0.694377331 | 0.784784124 | SMAD1      |
| ENSG00000188215 | 486.8639654 | 442.9725961 | 0.1363243    | 0.694500347 | 0.784868997 | DCUN1D3    |
| ENSG00000284286 | 0.894837599 | 0.387220594 | 1.215011954  | 0.694512371 | 1           | MIR718     |
| ENSG00000213471 | 0.894837599 | 0.387220594 | 1.215011954  | 0.694512371 | 1           | TLL13P     |
| ENSG00000279584 | 0.894837599 | 0.387220594 | 1.215011954  | 0.694512371 | 1           | AC005593.1 |
| ENSG00000115317 | 560.9881792 | 532.9227468 | 0.074299085  | 0.694512845 | 0.784868997 | HTRA2      |
| ENSG00000078795 | 5.775664997 | 4.433031935 | 0.393874472  | 0.694750075 | 0.78510294  | PKD2L2     |
| ENSG00000259370 | 3.841107482 | 6.0421216   | -0.642481754 | 0.694787873 | 0.785111505 | AC103740.1 |
| ENSG00000206337 | 0.89358395  | 0.387220594 | 1.213324902  | 0.694956331 | 1           | HCP5       |
| ENSG00000255082 | 0.89358395  | 0.387220594 | 1.213324902  | 0.694956331 | 1           | GRM5-AS1   |
| ENSG00000206674 | 0.89358395  | 0.387220594 | 1.213324902  | 0.694956331 | 1           | RNU6-945P  |
| ENSG00000215159 | 0.89358395  | 0.387220594 | 1.213324902  | 0.694956331 | 1           | AC025262.1 |
| ENSG00000264540 | 0.89358395  | 0.387220594 | 1.213324902  | 0.694956331 | 1           | RN7SL405P  |
| ENSG00000174917 | 1165.04927  | 1231.819155 | -0.080306212 | 0.695033996 | 0.785355467 | MICOS13    |
| ENSG00000135070 | 691.7294314 | 640.3515543 | 0.110866615  | 0.695117041 | 0.785365563 | ISCA1      |

|                 |             |             |              |             |             |            |
|-----------------|-------------|-------------|--------------|-------------|-------------|------------|
| ENSG00000140459 | 36.63661343 | 26.93748686 | 0.441382041  | 0.695124237 | 0.785365563 | CYP11A1    |
| ENSG00000150051 | 7.608178066 | 10.59112019 | -0.484780762 | 0.69513394  | 0.785365563 | MKX        |
| ENSG00000244921 | 1.200686205 | 2.058957692 | -0.787349685 | 0.695180208 | 0.785365563 | MTCYBP18   |
| ENSG00000124743 | 4.282991593 | 5.767143241 | -0.431703101 | 0.695194073 | 0.785365563 | KLHL31     |
| ENSG00000277342 | 5.978215508 | 4.13798448  | 0.52147611   | 0.695254951 | 0.785400186 | AC048344.4 |
| ENSG00000251495 | 18.6045814  | 22.88885019 | -0.29542113  | 0.695560252 | 0.785710909 | PPIAP11    |
| ENSG00000198832 | 2650.282099 | 2393.412528 | 0.147213075  | 0.6960218   | 0.78617667  | SELENOM    |
| ENSG00000280278 | 1.203193503 | 2.058957692 | -0.785111361 | 0.696033092 | 0.78617667  | AC009108.5 |
| ENSG00000267249 | 17.36105732 | 14.52353342 | 0.251425379  | 0.696162879 | 0.786289082 | AP005482.3 |
| ENSG00000240849 | 817.0116667 | 773.0672301 | 0.079629058  | 0.696238539 | 0.786340352 | TMEM189    |
| ENSG00000224713 | 27.57211812 | 22.47822127 | 0.294897946  | 0.696277268 | 0.78634991  | AC025165.1 |
| ENSG00000269028 | 0.894837599 | 0.356539013 | 1.214965452  | 0.696391808 | 1           | MTRNR2L12  |
| ENSG00000251586 | 0.894837599 | 0.356539013 | 1.214965452  | 0.696391808 | 1           | TET2-AS1   |
| ENSG00000179101 | 0.894837599 | 0.356539013 | 1.214965452  | 0.696391808 | 1           | AL590139.1 |
| ENSG00000256568 | 0.894837599 | 0.356539013 | 1.214965452  | 0.696391808 | 1           | AP002761.2 |
| ENSG00000213280 | 0.894837599 | 0.356539013 | 1.214965452  | 0.696391808 | 1           | AC090114.1 |
| ENSG00000228002 | 0.894837599 | 0.356539013 | 1.214965452  | 0.696391808 | 1           | DHX9P1     |
| ENSG00000253550 | 0.894837599 | 0.356539013 | 1.214965452  | 0.696391808 | 1           | AC016065.2 |
| ENSG00000227769 | 0.894837599 | 0.356539013 | 1.214965452  | 0.696391808 | 1           | AC072062.1 |
| ENSG00000200815 | 0.894837599 | 0.356539013 | 1.214965452  | 0.696391808 | 1           | RNU6-1091P |
| ENSG00000186452 | 0.894837599 | 0.356539013 | 1.214965452  | 0.696391808 | 1           | TMPRSS12   |
| ENSG00000284484 | 0.894837599 | 0.356539013 | 1.214965452  | 0.696391808 | 1           | AC025287.4 |
| ENSG00000267526 | 0.894837599 | 0.356539013 | 1.214965452  | 0.696391808 | 1           | AC005702.2 |
| ENSG00000275371 | 8.08634707  | 5.586521377 | 0.529471061  | 0.696392739 | 0.786438335 | AC012645.4 |
| ENSG00000141665 | 21.34418382 | 18.21280574 | 0.229128257  | 0.696416103 | 0.786438335 | FBXO15     |
| ENSG00000230408 | 1.480065645 | 2.558292127 | -0.778556729 | 0.696474856 | 0.786470498 | AC007163.1 |
| ENSG00000273565 | 2.391271949 | 3.790773684 | -0.649713695 | 0.696536303 | 0.786505702 | AL691403.2 |
| ENSG00000215030 | 1123.524448 | 1229.640589 | -0.130114315 | 0.696660789 | 0.786580807 | RPL13P12   |
| ENSG00000185869 | 103.5326936 | 112.4196989 | -0.120455026 | 0.696663367 | 0.786580807 | ZNF829     |
| novel.618       | 11.55007635 | 13.94019818 | -0.265273794 | 0.696755137 | 0.786650236 | -          |
| ENSG00000276867 | 1.846374476 | 1.029478846 | 0.819080417  | 0.696815114 | 0.786683765 | AC074050.4 |
| ENSG00000174898 | 0.89358395  | 0.356539013 | 1.213273763  | 0.696836798 | 1           | CATSPERD   |
| ENSG00000215480 | 0.89358395  | 0.356539013 | 1.213273763  | 0.696836798 | 1           | OR7E37P    |
| ENSG00000231063 | 0.89358395  | 0.356539013 | 1.213273763  | 0.696836798 | 1           | AC006994.1 |
| ENSG00000228079 | 0.89358395  | 0.356539013 | 1.213273763  | 0.696836798 | 1           | AC012368.2 |
| ENSG00000266240 | 0.89358395  | 0.356539013 | 1.213273763  | 0.696836798 | 1           | MIR5091    |
| ENSG00000182333 | 0.89358395  | 0.356539013 | 1.213273763  | 0.696836798 | 1           | LIPF       |
| ENSG00000284708 | 0.89358395  | 0.356539013 | 1.213273763  | 0.696836798 | 1           | AL031731.1 |
| ENSG00000224463 | 0.89358395  | 0.356539013 | 1.213273763  | 0.696836798 | 1           | AC079354.1 |
| ENSG00000240233 | 0.89358395  | 0.356539013 | 1.213273763  | 0.696836798 | 1           | RN7SL587P  |
| ENSG00000267651 | 0.89358395  | 0.356539013 | 1.213273763  | 0.696836798 | 1           | AC015961.1 |
| ENSG00000068745 | 1674.457548 | 1600.926401 | 0.064752457  | 0.697110216 | 0.786982729 | IP6K2      |
| ENSG00000145332 | 295.3418217 | 317.1121486 | -0.102787919 | 0.697170533 | 0.787016625 | KLHL8      |
| ENSG00000259078 | 0.925067711 | 1.90542139  | -1.037333215 | 0.697401939 | 0.787243647 | PTBP1P     |
| ENSG00000204010 | 0.879722543 | 1.783850939 | -1.011445249 | 0.697474973 | 1           | IFIT1B     |
| ENSG00000115170 | 535.2042525 | 589.8425641 | -0.1406289   | 0.69753454  | 0.78735912  | ACVR1      |
| ENSG00000198690 | 22.96160989 | 26.47700634 | -0.209674855 | 0.697566514 | 0.787361005 | FAN1       |
| ENSG00000251165 | 0.894837599 | 0.336469917 | 1.214934707  | 0.697644002 | 1           | F11-AS1    |
| ENSG00000225531 | 0.894837599 | 0.336469917 | 1.214934707  | 0.697644002 | 1           | AL807761.2 |
| ENSG00000215102 | 3.270994492 | 2.129777466 | 0.618784201  | 0.697652759 | 0.787424143 | TERF1P4    |
| ENSG00000260220 | 0.586481695 | 0           | 1.57005034   | 0.697653246 | 1           | CCDC187    |

|                 |             |   |            |             |   |            |
|-----------------|-------------|---|------------|-------------|---|------------|
| ENSG00000202512 | 0.586481695 | 0 | 1.57005034 | 0.697653246 | 1 | RN7SKP230  |
| ENSG00000286887 | 0.586481695 | 0 | 1.57005034 | 0.697653246 | 1 | AL355881.1 |
| ENSG00000178021 | 0.586481695 | 0 | 1.57005034 | 0.697653246 | 1 | TSPYL6     |
| ENSG00000276702 | 0.586481695 | 0 | 1.57005034 | 0.697653246 | 1 | AC010809.3 |
| ENSG00000272141 | 0.586481695 | 0 | 1.57005034 | 0.697653246 | 1 | AL390719.2 |
| ENSG00000284623 | 0.586481695 | 0 | 1.57005034 | 0.697653246 | 1 | AL139158.3 |
| ENSG00000275875 | 0.586481695 | 0 | 1.57005034 | 0.697653246 | 1 | AC091812.3 |
| ENSG00000274578 | 0.586481695 | 0 | 1.57005034 | 0.697653246 | 1 | AC006249.1 |
| ENSG00000204006 | 0.586481695 | 0 | 1.57005034 | 0.697653246 | 1 | C1orf185   |
| ENSG00000213386 | 0.586481695 | 0 | 1.57005034 | 0.697653246 | 1 | AC022217.1 |
| ENSG00000267275 | 0.586481695 | 0 | 1.57005034 | 0.697653246 | 1 | AC020911.2 |
| ENSG00000275332 | 0.586481695 | 0 | 1.57005034 | 0.697653246 | 1 | AC103691.2 |
| ENSG00000225203 | 0.586481695 | 0 | 1.57005034 | 0.697653246 | 1 | AL139230.1 |
| ENSG00000270378 | 0.586481695 | 0 | 1.57005034 | 0.697653246 | 1 | AC020891.4 |
| novel.621       | 0.586481695 | 0 | 1.57005034 | 0.697653246 | 1 | -          |
| ENSG00000233216 | 0.586481695 | 0 | 1.57005034 | 0.697653246 | 1 | AL357373.1 |
| ENSG00000225558 | 0.586481695 | 0 | 1.57005034 | 0.697653246 | 1 | UBE2D3P2   |
| ENSG00000244203 | 0.586481695 | 0 | 1.57005034 | 0.697653246 | 1 | FOXP1-AS1  |
| ENSG00000250796 | 0.586481695 | 0 | 1.57005034 | 0.697653246 | 1 | AC112484.2 |
| ENSG00000147869 | 0.586481695 | 0 | 1.57005034 | 0.697653246 | 1 | CER1       |
| ENSG00000213657 | 0.586481695 | 0 | 1.57005034 | 0.697653246 | 1 | RPL31P44   |
| ENSG00000261617 | 0.586481695 | 0 | 1.57005034 | 0.697653246 | 1 | LINC02177  |
| ENSG00000242522 | 0.586481695 | 0 | 1.57005034 | 0.697653246 | 1 | KLHL6-AS1  |
| ENSG00000251379 | 0.586481695 | 0 | 1.57005034 | 0.697653246 | 1 | AC099550.1 |
| ENSG00000253647 | 0.586481695 | 0 | 1.57005034 | 0.697653246 | 1 | AC027306.1 |
| ENSG00000204571 | 0.586481695 | 0 | 1.57005034 | 0.697653246 | 1 | KRTAP5-11  |
| ENSG00000139610 | 0.586481695 | 0 | 1.57005034 | 0.697653246 | 1 | CELA1      |
| ENSG00000274397 | 0.586481695 | 0 | 1.57005034 | 0.697653246 | 1 | AL357153.4 |
| novel.7         | 0.586481695 | 0 | 1.57005034 | 0.697653246 | 1 | -          |
| ENSG00000270911 | 0.586481695 | 0 | 1.57005034 | 0.697653246 | 1 | AC114878.2 |
| ENSG00000164175 | 0.586481695 | 0 | 1.57005034 | 0.697653246 | 1 | SLC45A2    |
| ENSG00000197575 | 0.586481695 | 0 | 1.57005034 | 0.697653246 | 1 | RPS17P2    |
| ENSG00000281831 | 0.586481695 | 0 | 1.57005034 | 0.697653246 | 1 | AL645929.2 |
| ENSG00000234788 | 0.586481695 | 0 | 1.57005034 | 0.697653246 | 1 | HSPA8P3    |
| ENSG00000255693 | 0.586481695 | 0 | 1.57005034 | 0.697653246 | 1 | LINC02389  |
| ENSG00000262999 | 0.586481695 | 0 | 1.57005034 | 0.697653246 | 1 | AC099489.3 |
| ENSG00000279200 | 0.586481695 | 0 | 1.57005034 | 0.697653246 | 1 | AC020558.3 |
| ENSG00000286978 | 0.586481695 | 0 | 1.57005034 | 0.697653246 | 1 | AC107067.1 |
| ENSG00000235051 | 0.586481695 | 0 | 1.57005034 | 0.697653246 | 1 | AL357497.1 |
| ENSG00000231193 | 0.586481695 | 0 | 1.57005034 | 0.697653246 | 1 | AL157884.2 |
| ENSG00000227892 | 0.586481695 | 0 | 1.57005034 | 0.697653246 | 1 | OR5P4P     |
| ENSG00000226620 | 0.586481695 | 0 | 1.57005034 | 0.697653246 | 1 | LINC00343  |
| ENSG00000260602 | 0.586481695 | 0 | 1.57005034 | 0.697653246 | 1 | HMG2P40    |
| ENSG00000266261 | 0.586481695 | 0 | 1.57005034 | 0.697653246 | 1 | AC005324.5 |
| ENSG00000264785 | 0.586481695 | 0 | 1.57005034 | 0.697653246 | 1 | AC005722.3 |
| ENSG00000286976 | 0.586481695 | 0 | 1.57005034 | 0.697653246 | 1 | AC084335.1 |
| ENSG00000287113 | 0.586481695 | 0 | 1.57005034 | 0.697653246 | 1 | AL139289.3 |
| ENSG00000229657 | 0.586481695 | 0 | 1.57005034 | 0.697653246 | 1 | AL391822.1 |
| ENSG00000250476 | 0.586481695 | 0 | 1.57005034 | 0.697653246 | 1 | ENPP7P9    |
| ENSG00000248565 | 0.586481695 | 0 | 1.57005034 | 0.697653246 | 1 | TECRP2     |
| ENSG00000207344 | 0.586481695 | 0 | 1.57005034 | 0.697653246 | 1 | SNORA22C   |

|                 |             |   |            |             |   |            |
|-----------------|-------------|---|------------|-------------|---|------------|
| ENSG00000283703 | 0.586481695 | 0 | 1.57005034 | 0.697653246 | 1 | VSIG10L2   |
| ENSG00000257951 | 0.586481695 | 0 | 1.57005034 | 0.697653246 | 1 | AC126177.5 |
| ENSG00000234835 | 0.586481695 | 0 | 1.57005034 | 0.697653246 | 1 | PHBP13     |
| ENSG00000278665 | 0.586481695 | 0 | 1.57005034 | 0.697653246 | 1 | AC020765.3 |
| ENSG00000231015 | 0.586481695 | 0 | 1.57005034 | 0.697653246 | 1 | AL049594.1 |
| ENSG00000267749 | 0.586481695 | 0 | 1.57005034 | 0.697653246 | 1 | AC092068.3 |
| ENSG00000230368 | 0.586481695 | 0 | 1.57005034 | 0.697653246 | 1 | FAM41C     |
| ENSG00000224968 | 0.586481695 | 0 | 1.57005034 | 0.697653246 | 1 | LINC01645  |
| ENSG00000229798 | 0.586481695 | 0 | 1.57005034 | 0.697653246 | 1 | KRT18P26   |
| ENSG00000260059 | 0.586481695 | 0 | 1.57005034 | 0.697653246 | 1 | AC092620.2 |
| ENSG00000071677 | 0.586481695 | 0 | 1.57005034 | 0.697653246 | 1 | PRLH       |
| ENSG00000269886 | 0.586481695 | 0 | 1.57005034 | 0.697653246 | 1 | AC022382.1 |
| ENSG00000243314 | 0.586481695 | 0 | 1.57005034 | 0.697653246 | 1 | AC106707.2 |
| ENSG00000248577 | 0.586481695 | 0 | 1.57005034 | 0.697653246 | 1 | AC091435.1 |
| ENSG00000250260 | 0.586481695 | 0 | 1.57005034 | 0.697653246 | 1 | AC113382.2 |
| ENSG00000251031 | 0.586481695 | 0 | 1.57005034 | 0.697653246 | 1 | AC132803.1 |
| ENSG00000218857 | 0.586481695 | 0 | 1.57005034 | 0.697653246 | 1 | AL137222.1 |
| ENSG00000206895 | 0.586481695 | 0 | 1.57005034 | 0.697653246 | 1 | RF00019    |
| ENSG00000251451 | 0.586481695 | 0 | 1.57005034 | 0.697653246 | 1 | GTF2IP9    |
| ENSG00000274680 | 0.586481695 | 0 | 1.57005034 | 0.697653246 | 1 | MYO5BP1    |
| ENSG00000130948 | 0.586481695 | 0 | 1.57005034 | 0.697653246 | 1 | HSD17B3    |
| ENSG00000206690 | 0.586481695 | 0 | 1.57005034 | 0.697653246 | 1 | RF00019    |
| ENSG00000240294 | 0.586481695 | 0 | 1.57005034 | 0.697653246 | 1 | RN7SKP241  |
| ENSG00000204020 | 0.586481695 | 0 | 1.57005034 | 0.697653246 | 1 | LIPN       |
| ENSG00000257164 | 0.586481695 | 0 | 1.57005034 | 0.697653246 | 1 | LINC02451  |
| ENSG00000276573 | 0.586481695 | 0 | 1.57005034 | 0.697653246 | 1 | AL442067.1 |
| ENSG00000235731 | 0.586481695 | 0 | 1.57005034 | 0.697653246 | 1 | LINC02250  |
| ENSG00000273971 | 0.586481695 | 0 | 1.57005034 | 0.697653246 | 1 | AC009163.5 |
| ENSG00000264000 | 0.586481695 | 0 | 1.57005034 | 0.697653246 | 1 | AP005059.1 |
| ENSG00000250917 | 0.586481695 | 0 | 1.57005034 | 0.697653246 | 1 | AL035458.2 |
| ENSG00000158816 | 0.586481695 | 0 | 1.57005034 | 0.697653246 | 1 | VWA5B1     |
| ENSG00000189030 | 0.586481695 | 0 | 1.57005034 | 0.697653246 | 1 | VHLL       |
| ENSG00000234423 | 0.586481695 | 0 | 1.57005034 | 0.697653246 | 1 | LINC01250  |
| ENSG00000207944 | 0.586481695 | 0 | 1.57005034 | 0.697653246 | 1 | MIR574     |
| ENSG00000252544 | 0.586481695 | 0 | 1.57005034 | 0.697653246 | 1 | RNU6-1282P |
| ENSG00000249539 | 0.586481695 | 0 | 1.57005034 | 0.697653246 | 1 | MRPS36P2   |
| ENSG00000287790 | 0.586481695 | 0 | 1.57005034 | 0.697653246 | 1 | AC025756.1 |
| ENSG00000248752 | 0.586481695 | 0 | 1.57005034 | 0.697653246 | 1 | AC116362.1 |
| ENSG00000206881 | 0.586481695 | 0 | 1.57005034 | 0.697653246 | 1 | RNU6-190P  |
| ENSG00000260524 | 0.586481695 | 0 | 1.57005034 | 0.697653246 | 1 | CYP3A52P   |
| ENSG00000255666 | 0.586481695 | 0 | 1.57005034 | 0.697653246 | 1 | AP000943.2 |
| ENSG00000255605 | 0.586481695 | 0 | 1.57005034 | 0.697653246 | 1 | AP000820.1 |
| ENSG00000252081 | 0.586481695 | 0 | 1.57005034 | 0.697653246 | 1 | RNU6-277P  |
| ENSG00000279358 | 0.586481695 | 0 | 1.57005034 | 0.697653246 | 1 | AP002833.3 |
| ENSG00000224412 | 0.586481695 | 0 | 1.57005034 | 0.697653246 | 1 | AC022022.1 |
| ENSG00000238446 | 0.586481695 | 0 | 1.57005034 | 0.697653246 | 1 | RNU7-38P   |
| ENSG00000225423 | 0.586481695 | 0 | 1.57005034 | 0.697653246 | 1 | TNPO1P1    |
| ENSG00000256557 | 0.586481695 | 0 | 1.57005034 | 0.697653246 | 1 | AC009509.3 |
| ENSG00000286056 | 0.586481695 | 0 | 1.57005034 | 0.697653246 | 1 | AC008055.2 |
| ENSG00000260979 | 0.586481695 | 0 | 1.57005034 | 0.697653246 | 1 | AC022167.3 |
| ENSG00000264695 | 0.586481695 | 0 | 1.57005034 | 0.697653246 | 1 | AC007922.1 |

|                 |             |   |            |             |   |             |
|-----------------|-------------|---|------------|-------------|---|-------------|
| ENSG00000141437 | 0.586481695 | 0 | 1.57005034 | 0.697653246 | 1 | SLC25A52    |
| ENSG00000100987 | 0.586481695 | 0 | 1.57005034 | 0.697653246 | 1 | VSX1        |
| ENSG00000267212 | 0.586481695 | 0 | 1.57005034 | 0.697653246 | 1 | AC018761.3  |
| ENSG00000237731 | 0.586481695 | 0 | 1.57005034 | 0.697653246 | 1 | RNGTTP1     |
| ENSG00000226501 | 0.586481695 | 0 | 1.57005034 | 0.697653246 | 1 | USF1P1      |
| ENSG00000188782 | 0.586481695 | 0 | 1.57005034 | 0.697653246 | 1 | CATSPER4    |
| ENSG00000130766 | 0.586481695 | 0 | 1.57005034 | 0.697653246 | 1 | SES2        |
| ENSG00000237279 | 0.586481695 | 0 | 1.57005034 | 0.697653246 | 1 | AC099677.3  |
| ENSG00000235258 | 0.586481695 | 0 | 1.57005034 | 0.697653246 | 1 | NDUFB4P6    |
| ENSG00000224121 | 0.586481695 | 0 | 1.57005034 | 0.697653246 | 1 | ATG12P2     |
| ENSG00000241912 | 0.586481695 | 0 | 1.57005034 | 0.697653246 | 1 | AC078788.2  |
| ENSG00000286888 | 0.586481695 | 0 | 1.57005034 | 0.697653246 | 1 | AC006427.2  |
| ENSG00000260515 | 0.586481695 | 0 | 1.57005034 | 0.697653246 | 1 | AC034229.2  |
| ENSG00000250017 | 0.586481695 | 0 | 1.57005034 | 0.697653246 | 1 | AC117529.1  |
| ENSG00000250347 | 0.586481695 | 0 | 1.57005034 | 0.697653246 | 1 | AC005740.2  |
| ENSG00000226599 | 0.586481695 | 0 | 1.57005034 | 0.697653246 | 1 | AL450344.2  |
| ENSG00000200446 | 0.586481695 | 0 | 1.57005034 | 0.697653246 | 1 | RNU6-1085P  |
| ENSG00000286767 | 0.586481695 | 0 | 1.57005034 | 0.697653246 | 1 | AL023877.1  |
| ENSG00000268916 | 0.586481695 | 0 | 1.57005034 | 0.697653246 | 1 | CSAG3       |
| ENSG00000284614 | 0.586481695 | 0 | 1.57005034 | 0.697653246 | 1 | AF228730.4  |
| ENSG00000213003 | 0.586481695 | 0 | 1.57005034 | 0.697653246 | 1 | BTF3P12     |
| ENSG00000254450 | 0.586481695 | 0 | 1.57005034 | 0.697653246 | 1 | ALG9-IT1    |
| ENSG00000254960 | 0.586481695 | 0 | 1.57005034 | 0.697653246 | 1 | KIRREL3-AS2 |
| ENSG00000274197 | 0.586481695 | 0 | 1.57005034 | 0.697653246 | 1 | RF00015     |
| ENSG00000285712 | 0.586481695 | 0 | 1.57005034 | 0.697653246 | 1 | AC068707.1  |
| ENSG00000288090 | 0.586481695 | 0 | 1.57005034 | 0.697653246 | 1 | AC010163.3  |
| ENSG00000226676 | 0.586481695 | 0 | 1.57005034 | 0.697653246 | 1 | LINC02679   |
| ENSG00000252917 | 0.586481695 | 0 | 1.57005034 | 0.697653246 | 1 | RF00090     |
| ENSG00000258308 | 0.586481695 | 0 | 1.57005034 | 0.697653246 | 1 | AC079907.2  |
| ENSG00000229473 | 0.586481695 | 0 | 1.57005034 | 0.697653246 | 1 | RGS17P1     |
| ENSG00000199461 | 0.586481695 | 0 | 1.57005034 | 0.697653246 | 1 | RF00019     |
| ENSG00000259483 | 0.586481695 | 0 | 1.57005034 | 0.697653246 | 1 | AL355073.1  |
| ENSG00000242634 | 0.586481695 | 0 | 1.57005034 | 0.697653246 | 1 | RPS24P16    |
| ENSG00000260909 | 0.586481695 | 0 | 1.57005034 | 0.697653246 | 1 | AC012186.1  |
| ENSG00000261519 | 0.586481695 | 0 | 1.57005034 | 0.697653246 | 1 | AC010542.4  |
| ENSG00000283755 | 0.586481695 | 0 | 1.57005034 | 0.697653246 | 1 | CPHXL       |
| ENSG00000262905 | 0.586481695 | 0 | 1.57005034 | 0.697653246 | 1 | AC015853.1  |
| ENSG00000243370 | 0.586481695 | 0 | 1.57005034 | 0.697653246 | 1 | RN7SL775P   |
| ENSG00000264373 | 0.586481695 | 0 | 1.57005034 | 0.697653246 | 1 | AC005899.2  |
| ENSG00000004939 | 0.586481695 | 0 | 1.57005034 | 0.697653246 | 1 | SLC4A1      |
| ENSG00000268654 | 0.586481695 | 0 | 1.57005034 | 0.697653246 | 1 | MIMT1       |
| ENSG00000211662 | 0.586481695 | 0 | 1.57005034 | 0.697653246 | 1 | IGLV3-21    |
| ENSG00000224883 | 0.586481695 | 0 | 1.57005034 | 0.697653246 | 1 | Z99716.1    |
| ENSG00000232260 | 0.586481695 | 0 | 1.57005034 | 0.697653246 | 1 | BTF3L4P1    |
| ENSG00000283040 | 0.586481695 | 0 | 1.57005034 | 0.697653246 | 1 | AL669831.6  |
| ENSG00000236500 | 0.586481695 | 0 | 1.57005034 | 0.697653246 | 1 | CD24P1      |
| ENSG00000201148 | 0.586481695 | 0 | 1.57005034 | 0.697653246 | 1 | RNA5SP42    |
| ENSG00000279096 | 0.586481695 | 0 | 1.57005034 | 0.697653246 | 1 | AL356289.3  |
| ENSG00000237163 | 0.586481695 | 0 | 1.57005034 | 0.697653246 | 1 | AC099794.2  |
| ENSG00000234497 | 0.586481695 | 0 | 1.57005034 | 0.697653246 | 1 | ERICH3-AS1  |
| ENSG00000206679 | 0.586481695 | 0 | 1.57005034 | 0.697653246 | 1 | RF00019     |

|                 |             |   |            |             |   |            |
|-----------------|-------------|---|------------|-------------|---|------------|
| ENSG00000232971 | 0.586481695 | 0 | 1.57005034 | 0.697653246 | 1 | AL591719.2 |
| ENSG00000200360 | 0.586481695 | 0 | 1.57005034 | 0.697653246 | 1 | RNU6-792P  |
| ENSG00000224335 | 0.586481695 | 0 | 1.57005034 | 0.697653246 | 1 | AC239809.1 |
| ENSG00000229357 | 0.586481695 | 0 | 1.57005034 | 0.697653246 | 1 | CYCSP51    |
| ENSG00000285818 | 0.586481695 | 0 | 1.57005034 | 0.697653246 | 1 | AL591893.1 |
| ENSG00000160767 | 0.586481695 | 0 | 1.57005034 | 0.697653246 | 1 | FAM189B    |
| ENSG00000198358 | 0.586481695 | 0 | 1.57005034 | 0.697653246 | 1 | AL354714.1 |
| ENSG00000271917 | 0.586481695 | 0 | 1.57005034 | 0.697653246 | 1 | AL357568.2 |
| ENSG00000232959 | 0.586481695 | 0 | 1.57005034 | 0.697653246 | 1 | AL356475.1 |
| ENSG00000230777 | 0.586481695 | 0 | 1.57005034 | 0.697653246 | 1 | RPS29P5    |
| ENSG00000230550 | 0.586481695 | 0 | 1.57005034 | 0.697653246 | 1 | ERLNC1     |
| ENSG00000230063 | 0.586481695 | 0 | 1.57005034 | 0.697653246 | 1 | AL360091.2 |
| ENSG00000286213 | 0.586481695 | 0 | 1.57005034 | 0.697653246 | 1 | AC092803.3 |
| ENSG00000226211 | 0.586481695 | 0 | 1.57005034 | 0.697653246 | 1 | AL445466.1 |
| ENSG00000252822 | 0.586481695 | 0 | 1.57005034 | 0.697653246 | 1 | RF00019    |
| ENSG00000225222 | 0.586481695 | 0 | 1.57005034 | 0.697653246 | 1 | CHCHD4P5   |
| ENSG00000231482 | 0.586481695 | 0 | 1.57005034 | 0.697653246 | 1 | AC105450.1 |
| ENSG00000237992 | 0.586481695 | 0 | 1.57005034 | 0.697653246 | 1 | LINC01808  |
| ENSG00000238111 | 0.586481695 | 0 | 1.57005034 | 0.697653246 | 1 | AC066692.1 |
| ENSG00000274159 | 0.586481695 | 0 | 1.57005034 | 0.697653246 | 1 | AL133243.1 |
| ENSG00000202309 | 0.586481695 | 0 | 1.57005034 | 0.697653246 | 1 | RF00019    |
| ENSG00000214691 | 0.586481695 | 0 | 1.57005034 | 0.697653246 | 1 | LINC01913  |
| ENSG00000232526 | 0.586481695 | 0 | 1.57005034 | 0.697653246 | 1 | VDAC1P13   |
| ENSG00000228100 | 0.586481695 | 0 | 1.57005034 | 0.697653246 | 1 | LINC01820  |
| ENSG00000271615 | 0.586481695 | 0 | 1.57005034 | 0.697653246 | 1 | ACTG1P22   |
| ENSG00000278523 | 0.586481695 | 0 | 1.57005034 | 0.697653246 | 1 | RF00019    |
| ENSG00000236259 | 0.586481695 | 0 | 1.57005034 | 0.697653246 | 1 | PPIAP64    |
| ENSG00000231331 | 0.586481695 | 0 | 1.57005034 | 0.697653246 | 1 | AC103563.3 |
| ENSG00000230065 | 0.586481695 | 0 | 1.57005034 | 0.697653246 | 1 | AC010974.1 |
| ENSG00000224231 | 0.586481695 | 0 | 1.57005034 | 0.697653246 | 1 | LINC01832  |
| ENSG00000227708 | 0.586481695 | 0 | 1.57005034 | 0.697653246 | 1 | LINC01850  |
| ENSG00000230104 | 0.586481695 | 0 | 1.57005034 | 0.697653246 | 1 | AC018712.1 |
| ENSG00000222418 | 0.586481695 | 0 | 1.57005034 | 0.697653246 | 1 | RNA5SP113  |
| ENSG00000231699 | 0.586481695 | 0 | 1.57005034 | 0.697653246 | 1 | AC020550.1 |
| ENSG00000222972 | 0.586481695 | 0 | 1.57005034 | 0.697653246 | 1 | RNU6-651P  |
| ENSG00000224391 | 0.586481695 | 0 | 1.57005034 | 0.697653246 | 1 | LINC01280  |
| ENSG00000228499 | 0.586481695 | 0 | 1.57005034 | 0.697653246 | 1 | TMSB10P1   |
| ENSG00000224844 | 0.586481695 | 0 | 1.57005034 | 0.697653246 | 1 | AC107079.1 |
| ENSG00000232563 | 0.586481695 | 0 | 1.57005034 | 0.697653246 | 1 | CRB3P1     |
| ENSG00000266745 | 0.586481695 | 0 | 1.57005034 | 0.697653246 | 1 | MIR3135A   |
| ENSG00000237433 | 0.586481695 | 0 | 1.57005034 | 0.697653246 | 1 | RPSAP11    |
| ENSG00000226955 | 0.586481695 | 0 | 1.57005034 | 0.697653246 | 1 | AC104306.2 |
| ENSG00000239128 | 0.586481695 | 0 | 1.57005034 | 0.697653246 | 1 | SNORD13P3  |
| ENSG00000223409 | 0.586481695 | 0 | 1.57005034 | 0.697653246 | 1 | RPL17P17   |
| ENSG00000249321 | 0.586481695 | 0 | 1.57005034 | 0.697653246 | 1 | OR5H5P     |
| ENSG00000239997 | 0.586481695 | 0 | 1.57005034 | 0.697653246 | 1 | FCF1P3     |
| ENSG00000243483 | 0.586481695 | 0 | 1.57005034 | 0.697653246 | 1 | AC078785.3 |
| ENSG00000243429 | 0.586481695 | 0 | 1.57005034 | 0.697653246 | 1 | OR7E29P    |
| ENSG00000243977 | 0.586481695 | 0 | 1.57005034 | 0.697653246 | 1 | AC125604.1 |
| ENSG00000251087 | 0.586481695 | 0 | 1.57005034 | 0.697653246 | 1 | ALG1L3P    |
| ENSG00000169676 | 0.586481695 | 0 | 1.57005034 | 0.697653246 | 1 | DRD5       |

|                 |             |   |            |             |   |            |
|-----------------|-------------|---|------------|-------------|---|------------|
| ENSG00000226439 | 0.586481695 | 0 | 1.57005034 | 0.697653246 | 1 | AC108161.1 |
| ENSG00000229717 | 0.586481695 | 0 | 1.57005034 | 0.697653246 | 1 | AC110615.1 |
| ENSG00000270842 | 0.586481695 | 0 | 1.57005034 | 0.697653246 | 1 | AC073413.2 |
| ENSG00000252757 | 0.586481695 | 0 | 1.57005034 | 0.697653246 | 1 | RN7SKP96   |
| ENSG00000287845 | 0.586481695 | 0 | 1.57005034 | 0.697653246 | 1 | AC093765.5 |
| ENSG00000221245 | 0.586481695 | 0 | 1.57005034 | 0.697653246 | 1 | RF00614    |
| ENSG00000251488 | 0.586481695 | 0 | 1.57005034 | 0.697653246 | 1 | AC115622.1 |
| ENSG00000265623 | 0.586481695 | 0 | 1.57005034 | 0.697653246 | 1 | MIR3139    |
| ENSG00000286420 | 0.586481695 | 0 | 1.57005034 | 0.697653246 | 1 | AC093796.1 |
| ENSG00000177803 | 0.586481695 | 0 | 1.57005034 | 0.697653246 | 1 | AC112247.1 |
| ENSG00000248249 | 0.586481695 | 0 | 1.57005034 | 0.697653246 | 1 | AC110794.1 |
| ENSG00000252343 | 0.586481695 | 0 | 1.57005034 | 0.697653246 | 1 | RNU2-34P   |
| ENSG00000248816 | 0.586481695 | 0 | 1.57005034 | 0.697653246 | 1 | AC079226.2 |
| ENSG00000249737 | 0.586481695 | 0 | 1.57005034 | 0.697653246 | 1 | AC020980.1 |
| ENSG00000206682 | 0.586481695 | 0 | 1.57005034 | 0.697653246 | 1 | RF00019    |
| ENSG00000248185 | 0.586481695 | 0 | 1.57005034 | 0.697653246 | 1 | AC025445.1 |
| ENSG00000251206 | 0.586481695 | 0 | 1.57005034 | 0.697653246 | 1 | AC010420.1 |
| ENSG00000286647 | 0.586481695 | 0 | 1.57005034 | 0.697653246 | 1 | AC008459.1 |
| ENSG00000250066 | 0.586481695 | 0 | 1.57005034 | 0.697653246 | 1 | AC093248.1 |
| ENSG00000250705 | 0.586481695 | 0 | 1.57005034 | 0.697653246 | 1 | AC008526.1 |
| ENSG00000248268 | 0.586481695 | 0 | 1.57005034 | 0.697653246 | 1 | AC010275.1 |
| ENSG00000200161 | 0.586481695 | 0 | 1.57005034 | 0.697653246 | 1 | RN7SKP145  |
| ENSG00000248647 | 0.586481695 | 0 | 1.57005034 | 0.697653246 | 1 | AC012613.1 |
| ENSG00000212529 | 0.586481695 | 0 | 1.57005034 | 0.697653246 | 1 | RF00191    |
| ENSG00000251211 | 0.586481695 | 0 | 1.57005034 | 0.697653246 | 1 | AC136632.2 |
| ENSG00000234763 | 0.586481695 | 0 | 1.57005034 | 0.697653246 | 1 | AL359378.1 |
| ENSG00000271245 | 0.586481695 | 0 | 1.57005034 | 0.697653246 | 1 | AL136139.1 |
| ENSG00000261745 | 0.586481695 | 0 | 1.57005034 | 0.697653246 | 1 | AL512347.1 |
| ENSG00000207180 | 0.586481695 | 0 | 1.57005034 | 0.697653246 | 1 | RNU6-411P  |
| ENSG00000230597 | 0.586481695 | 0 | 1.57005034 | 0.697653246 | 1 | AL136164.1 |
| ENSG00000226840 | 0.586481695 | 0 | 1.57005034 | 0.697653246 | 1 | PAICSP3    |
| ENSG00000220378 | 0.586481695 | 0 | 1.57005034 | 0.697653246 | 1 | KRT8P42    |
| ENSG00000220600 | 0.586481695 | 0 | 1.57005034 | 0.697653246 | 1 | AL121834.1 |
| ENSG00000213721 | 0.586481695 | 0 | 1.57005034 | 0.697653246 | 1 | HMG2P30    |
| ENSG00000286404 | 0.586481695 | 0 | 1.57005034 | 0.697653246 | 1 | AC011228.2 |
| ENSG00000232032 | 0.586481695 | 0 | 1.57005034 | 0.697653246 | 1 | AC079781.2 |
| ENSG00000237632 | 0.586481695 | 0 | 1.57005034 | 0.697653246 | 1 | S100A11P1  |
| ENSG00000232922 | 0.586481695 | 0 | 1.57005034 | 0.697653246 | 1 | MTND6P24   |
| ENSG00000214003 | 0.586481695 | 0 | 1.57005034 | 0.697653246 | 1 | ATP5PBP3   |
| ENSG00000207320 | 0.586481695 | 0 | 1.57005034 | 0.697653246 | 1 | RF00019    |
| ENSG00000228550 | 0.586481695 | 0 | 1.57005034 | 0.697653246 | 1 | AC073583.1 |
| ENSG00000231913 | 0.586481695 | 0 | 1.57005034 | 0.697653246 | 1 | RARRES2P3  |
| ENSG00000275681 | 0.586481695 | 0 | 1.57005034 | 0.697653246 | 1 | U73479.1   |
| ENSG00000201666 | 0.586481695 | 0 | 1.57005034 | 0.697653246 | 1 | RF00284    |
| ENSG00000229331 | 0.586481695 | 0 | 1.57005034 | 0.697653246 | 1 | GK-IT1     |
| ENSG00000236828 | 0.586481695 | 0 | 1.57005034 | 0.697653246 | 1 | DMD-AS3    |
| ENSG00000230039 | 0.586481695 | 0 | 1.57005034 | 0.697653246 | 1 | AL450487.1 |
| ENSG00000222810 | 0.586481695 | 0 | 1.57005034 | 0.697653246 | 1 | RNU2-68P   |
| ENSG00000237211 | 0.586481695 | 0 | 1.57005034 | 0.697653246 | 1 | SETP4      |
| ENSG00000230320 | 0.586481695 | 0 | 1.57005034 | 0.697653246 | 1 | BEND7P1    |
| ENSG00000226241 | 0.586481695 | 0 | 1.57005034 | 0.697653246 | 1 | Z75746.1   |

|                 |             |   |            |             |   |             |
|-----------------|-------------|---|------------|-------------|---|-------------|
| ENSG00000200291 | 0.586481695 | 0 | 1.57005034 | 0.697653246 | 1 | RF00019     |
| ENSG00000273710 | 0.586481695 | 0 | 1.57005034 | 0.697653246 | 1 | RF00017     |
| ENSG00000271377 | 0.586481695 | 0 | 1.57005034 | 0.697653246 | 1 | AC113143.2  |
| ENSG00000147596 | 0.586481695 | 0 | 1.57005034 | 0.697653246 | 1 | PRDM14      |
| ENSG00000253226 | 0.586481695 | 0 | 1.57005034 | 0.697653246 | 1 | HAUS1P3     |
| ENSG00000206776 | 0.586481695 | 0 | 1.57005034 | 0.697653246 | 1 | RF00421     |
| ENSG00000204949 | 0.586481695 | 0 | 1.57005034 | 0.697653246 | 1 | FAM83A-AS1  |
| ENSG00000222607 | 0.586481695 | 0 | 1.57005034 | 0.697653246 | 1 | RNU6-628P   |
| ENSG00000250733 | 0.586481695 | 0 | 1.57005034 | 0.697653246 | 1 | C8orf17     |
| ENSG00000231108 | 0.586481695 | 0 | 1.57005034 | 0.697653246 | 1 | PRELID3BP11 |
| ENSG00000287495 | 0.586481695 | 0 | 1.57005034 | 0.697653246 | 1 | AL356489.4  |
| ENSG00000225626 | 0.586481695 | 0 | 1.57005034 | 0.697653246 | 1 | C9orf135-DT |
| ENSG00000223012 | 0.586481695 | 0 | 1.57005034 | 0.697653246 | 1 | RN7SKP264   |
| ENSG00000177992 | 0.586481695 | 0 | 1.57005034 | 0.697653246 | 1 | SPATA31E1   |
| ENSG00000238288 | 0.586481695 | 0 | 1.57005034 | 0.697653246 | 1 | MTND3P23    |
| ENSG00000213669 | 0.586481695 | 0 | 1.57005034 | 0.697653246 | 1 | AL137074.1  |
| ENSG00000223238 | 0.586481695 | 0 | 1.57005034 | 0.697653246 | 1 | RNA5SP294   |
| ENSG00000199525 | 0.586481695 | 0 | 1.57005034 | 0.697653246 | 1 | RNA5SP295   |
| ENSG00000221676 | 0.586481695 | 0 | 1.57005034 | 0.697653246 | 1 | RNU6ATAC    |
| ENSG00000238304 | 0.586481695 | 0 | 1.57005034 | 0.697653246 | 1 | RNU7-50P    |
| ENSG00000176239 | 0.586481695 | 0 | 1.57005034 | 0.697653246 | 1 | OR51B6      |
| ENSG00000230484 | 0.586481695 | 0 | 1.57005034 | 0.697653246 | 1 | OR51A10P    |
| ENSG00000246820 | 0.586481695 | 0 | 1.57005034 | 0.697653246 | 1 | RIC3-DT     |
| ENSG00000251381 | 0.586481695 | 0 | 1.57005034 | 0.697653246 | 1 | LINC00958   |
| ENSG00000254622 | 0.586481695 | 0 | 1.57005034 | 0.697653246 | 1 | NAV2-AS4    |
| ENSG00000212289 | 0.586481695 | 0 | 1.57005034 | 0.697653246 | 1 | RNA5SP339   |
| ENSG00000172208 | 0.586481695 | 0 | 1.57005034 | 0.697653246 | 1 | OR4X2       |
| ENSG00000254979 | 0.586481695 | 0 | 1.57005034 | 0.697653246 | 1 | AP000781.2  |
| ENSG00000176495 | 0.586481695 | 0 | 1.57005034 | 0.697653246 | 1 | OR5AN1      |
| ENSG00000254885 | 0.586481695 | 0 | 1.57005034 | 0.697653246 | 1 | AP001547.1  |
| ENSG00000197692 | 0.586481695 | 0 | 1.57005034 | 0.697653246 | 1 | CBX3P7      |
| ENSG00000255417 | 0.586481695 | 0 | 1.57005034 | 0.697653246 | 1 | MTCO2P15    |
| ENSG00000154143 | 0.586481695 | 0 | 1.57005034 | 0.697653246 | 1 | PANX3       |
| ENSG00000238262 | 0.586481695 | 0 | 1.57005034 | 0.697653246 | 1 | NTM-IT      |
| ENSG00000202508 | 0.586481695 | 0 | 1.57005034 | 0.697653246 | 1 | RF00019     |
| ENSG00000285671 | 0.586481695 | 0 | 1.57005034 | 0.697653246 | 1 | AL139405.1  |
| ENSG00000235940 | 0.586481695 | 0 | 1.57005034 | 0.697653246 | 1 | MTND1P21    |
| ENSG00000199222 | 0.586481695 | 0 | 1.57005034 | 0.697653246 | 1 | RF00019     |
| ENSG00000239731 | 0.586481695 | 0 | 1.57005034 | 0.697653246 | 1 | RN7SL825P   |
| ENSG00000215184 | 0.586481695 | 0 | 1.57005034 | 0.697653246 | 1 | RPS12P16    |
| ENSG00000285958 | 0.586481695 | 0 | 1.57005034 | 0.697653246 | 1 | AC073174.1  |
| ENSG00000272592 | 0.586481695 | 0 | 1.57005034 | 0.697653246 | 1 | AL451049.1  |
| ENSG00000207438 | 0.586481695 | 0 | 1.57005034 | 0.697653246 | 1 | RF00019     |
| ENSG00000200176 | 0.586481695 | 0 | 1.57005034 | 0.697653246 | 1 | RNU1-19P    |
| ENSG00000214067 | 0.586481695 | 0 | 1.57005034 | 0.697653246 | 1 | AL360182.1  |
| ENSG00000221214 | 0.586481695 | 0 | 1.57005034 | 0.697653246 | 1 | MIR548E     |
| ENSG00000265442 | 0.586481695 | 0 | 1.57005034 | 0.697653246 | 1 | MIR3941     |
| ENSG00000222629 | 0.586481695 | 0 | 1.57005034 | 0.697653246 | 1 | RNU2-42P    |
| ENSG00000256988 | 0.586481695 | 0 | 1.57005034 | 0.697653246 | 1 | AC005833.2  |
| ENSG00000207176 | 0.586481695 | 0 | 1.57005034 | 0.697653246 | 1 | RF00019     |
| ENSG00000202034 | 0.586481695 | 0 | 1.57005034 | 0.697653246 | 1 | RNU6-399P   |



|                 |             |   |            |             |   |             |
|-----------------|-------------|---|------------|-------------|---|-------------|
| ENSG00000216306 | 0.586481695 | 0 | 1.57005034 | 0.697653246 | 1 | KRT19P2     |
| ENSG00000283052 | 0.586481695 | 0 | 1.57005034 | 0.697653246 | 1 | LINC02456   |
| ENSG00000257611 | 0.586481695 | 0 | 1.57005034 | 0.697653246 | 1 | AC010182.1  |
| ENSG00000200688 | 0.586481695 | 0 | 1.57005034 | 0.697653246 | 1 | RF00019     |
| ENSG00000240868 | 0.586481695 | 0 | 1.57005034 | 0.697653246 | 1 | C1QTNF9-AS1 |
| ENSG00000264226 | 0.586481695 | 0 | 1.57005034 | 0.697653246 | 1 | MIR3168     |
| ENSG00000233379 | 0.586481695 | 0 | 1.57005034 | 0.697653246 | 1 | AL139002.1  |
| ENSG00000257842 | 0.586481695 | 0 | 1.57005034 | 0.697653246 | 1 | LINC02588   |
| ENSG00000252945 | 0.586481695 | 0 | 1.57005034 | 0.697653246 | 1 | RF00593     |
| ENSG00000252400 | 0.586481695 | 0 | 1.57005034 | 0.697653246 | 1 | RNU6-1291P  |
| ENSG00000241542 | 0.586481695 | 0 | 1.57005034 | 0.697653246 | 1 | RN7SL369P   |
| ENSG00000287118 | 0.586481695 | 0 | 1.57005034 | 0.697653246 | 1 | AC008056.3  |
| ENSG00000258699 | 0.586481695 | 0 | 1.57005034 | 0.697653246 | 1 | AL357093.1  |
| ENSG00000258380 | 0.586481695 | 0 | 1.57005034 | 0.697653246 | 1 | AL356805.1  |
| ENSG00000258499 | 0.586481695 | 0 | 1.57005034 | 0.697653246 | 1 | LINC02287   |
| ENSG00000287772 | 0.586481695 | 0 | 1.57005034 | 0.697653246 | 1 | AL137786.3  |
| ENSG00000258986 | 0.586481695 | 0 | 1.57005034 | 0.697653246 | 1 | TMEM179     |
| ENSG00000287840 | 0.586481695 | 0 | 1.57005034 | 0.697653246 | 1 | AC009268.3  |
| ENSG00000259338 | 0.586481695 | 0 | 1.57005034 | 0.697653246 | 1 | AC051619.2  |
| ENSG00000259700 | 0.586481695 | 0 | 1.57005034 | 0.697653246 | 1 | AC012379.2  |
| ENSG00000259626 | 0.586481695 | 0 | 1.57005034 | 0.697653246 | 1 | MTND3P12    |
| ENSG00000264796 | 0.586481695 | 0 | 1.57005034 | 0.697653246 | 1 | MIR5009     |
| ENSG00000259312 | 0.586481695 | 0 | 1.57005034 | 0.697653246 | 1 | AC087477.3  |
| ENSG00000103355 | 0.586481695 | 0 | 1.57005034 | 0.697653246 | 1 | PRSS33      |
| ENSG00000261075 | 0.586481695 | 0 | 1.57005034 | 0.697653246 | 1 | LINC01195   |
| ENSG00000261394 | 0.586481695 | 0 | 1.57005034 | 0.697653246 | 1 | AC007598.2  |
| ENSG00000260592 | 0.586481695 | 0 | 1.57005034 | 0.697653246 | 1 | AC130456.3  |
| ENSG00000260866 | 0.586481695 | 0 | 1.57005034 | 0.697653246 | 1 | AC138915.2  |
| ENSG00000278926 | 0.586481695 | 0 | 1.57005034 | 0.697653246 | 1 | AC092134.2  |
| ENSG00000268078 | 0.586481695 | 0 | 1.57005034 | 0.697653246 | 1 | AC135012.2  |
| ENSG00000262106 | 0.586481695 | 0 | 1.57005034 | 0.697653246 | 1 | OR1D3P      |
| ENSG00000142484 | 0.586481695 | 0 | 1.57005034 | 0.697653246 | 1 | TM4SF5      |
| ENSG00000264066 | 0.586481695 | 0 | 1.57005034 | 0.697653246 | 1 | AC024267.1  |
| ENSG00000277632 | 0.586481695 | 0 | 1.57005034 | 0.697653246 | 1 | CCL3        |
| ENSG00000274808 | 0.586481695 | 0 | 1.57005034 | 0.697653246 | 1 | TBC1D3B     |
| ENSG00000287602 | 0.586481695 | 0 | 1.57005034 | 0.697653246 | 1 | AC100808.1  |
| ENSG00000265052 | 0.586481695 | 0 | 1.57005034 | 0.697653246 | 1 | RN7SL622P   |
| ENSG00000285931 | 0.586481695 | 0 | 1.57005034 | 0.697653246 | 1 | AC005495.2  |
| ENSG00000226101 | 0.586481695 | 0 | 1.57005034 | 0.697653246 | 1 | LINC02097   |
| ENSG00000279273 | 0.586481695 | 0 | 1.57005034 | 0.697653246 | 1 | AC120024.4  |
| ENSG00000263727 | 0.586481695 | 0 | 1.57005034 | 0.697653246 | 1 | AP001178.1  |
| ENSG00000202159 | 0.586481695 | 0 | 1.57005034 | 0.697653246 | 1 | RNU6-742P   |
| ENSG00000226263 | 0.586481695 | 0 | 1.57005034 | 0.697653246 | 1 | ISM1-AS1    |
| ENSG00000125850 | 0.586481695 | 0 | 1.57005034 | 0.697653246 | 1 | OVOL2       |
| ENSG00000287850 | 0.586481695 | 0 | 1.57005034 | 0.697653246 | 1 | AL121897.1  |
| ENSG00000286460 | 0.586481695 | 0 | 1.57005034 | 0.697653246 | 1 | AC006538.5  |
| ENSG00000232579 | 0.586481695 | 0 | 1.57005034 | 0.697653246 | 1 | MTCO1P27    |
| ENSG00000267670 | 0.586481695 | 0 | 1.57005034 | 0.697653246 | 1 | AC022098.2  |
| ENSG00000172519 | 0.586481695 | 0 | 1.57005034 | 0.697653246 | 1 | OR10H5      |
| ENSG00000264317 | 0.586481695 | 0 | 1.57005034 | 0.697653246 | 1 | RN7SL154P   |
| ENSG00000233681 | 0.586481695 | 0 | 1.57005034 | 0.697653246 | 1 | CEACAMP1    |

|                 |             |             |              |             |             |             |
|-----------------|-------------|-------------|--------------|-------------|-------------|-------------|
| ENSG00000243469 | 0.586481695 | 0           | 1.57005034   | 0.697653246 | 1           | RPL7P51     |
| ENSG00000196131 | 0.586481695 | 0           | 1.57005034   | 0.697653246 | 1           | VN1R2       |
| ENSG00000212855 | 0.586481695 | 0           | 1.57005034   | 0.697653246 | 1           | TTY2        |
| ENSG00000228411 | 0.586481695 | 0           | 1.57005034   | 0.697653246 | 1           | CDY4P       |
| ENSG00000252766 | 0.586481695 | 0           | 1.57005034   | 0.697653246 | 1           | RNU6-255P   |
| ENSG00000279440 | 0.586481695 | 0           | 1.57005034   | 0.697653246 | 1           | AL008638.3  |
| ENSG00000230741 | 0.586481695 | 0           | 1.57005034   | 0.697653246 | 1           | Z82173.1    |
| ENSG00000212939 | 0.586481695 | 0           | 1.57005034   | 0.697653246 | 1           | Z97192.1    |
| ENSG00000228941 | 0.586481695 | 0           | 1.57005034   | 0.697653246 | 1           | UBE3AP2     |
| ENSG00000224421 | 0.586481695 | 0           | 1.57005034   | 0.697653246 | 1           | ATP5MFP1    |
| ENSG00000199806 | 0.586481695 | 0           | 1.57005034   | 0.697653246 | 1           | RNA5SP491   |
| ENSG00000237373 | 0.586481695 | 0           | 1.57005034   | 0.697653246 | 1           | BRWD1-IT1   |
| ENSG00000233250 | 4.469173399 | 3.159256312 | 0.495613107  | 0.69779542  | 0.787550948 | AC233728.1  |
| ENSG00000179988 | 89.88874654 | 79.59735118 | 0.17419493   | 0.697859495 | 0.78758905  | PSTK        |
| ENSG00000260949 | 5.381633352 | 3.943154111 | 0.451108976  | 0.697973223 | 0.787683186 | AP006545.1  |
| ENSG00000137251 | 0.89358395  | 0.336469917 | 1.21323995   | 0.698089685 | 1           | TINAG       |
| ENSG00000268705 | 0.89358395  | 0.336469917 | 1.21323995   | 0.698089685 | 1           | BNIP3P26    |
| ENSG00000207839 | 0.89358395  | 0.336469917 | 1.21323995   | 0.698089685 | 1           | MIR33B      |
| ENSG00000273476 | 0.89358395  | 0.336469917 | 1.21323995   | 0.698089685 | 1           | AL133215.3  |
| ENSG00000241640 | 0.89358395  | 0.336469917 | 1.21323995   | 0.698089685 | 1           | AC092757.1  |
| ENSG00000144848 | 892.225791  | 948.5566493 | -0.088598745 | 0.698268925 | 0.787982667 | ATG3        |
| ENSG00000170348 | 5080.045762 | 5381.495089 | -0.083172396 | 0.698524237 | 0.788236544 | TMED10      |
| ENSG00000273218 | 7.51623408  | 9.294706927 | -0.305122054 | 0.698600802 | 0.788288705 | AC005776.2  |
| ENSG00000261399 | 0.879722543 | 2.139234076 | -1.277054375 | 0.699049017 | 0.788760207 | AL031710.1  |
| ENSG00000278999 | 0.879722543 | 1.813376645 | -1.03324999  | 0.699199807 | 0.788896086 | AC008985.1  |
| ENSG00000132970 | 234.7164424 | 212.248243  | 0.144719719  | 0.699245944 | 0.788913882 | WASF3       |
| ENSG00000231616 | 3.546612985 | 2.120320855 | 0.741872647  | 0.69950537  | 0.789172306 | AL354733.2  |
| ENSG00000226479 | 766.7602235 | 711.3163504 | 0.107917683  | 0.699551553 | 0.789190139 | TMEM185B    |
| ENSG00000213885 | 13.07799446 | 15.80548138 | -0.267687276 | 0.6995879   | 0.789190195 | RPL13AP7    |
| ENSG00000240666 | 2.463086283 | 4.013973884 | -0.705669367 | 0.699612354 | 0.789190195 | MME-AS1     |
| ENSG00000287133 | 2.741212075 | 1.844058227 | 0.582708194  | 0.699839536 | 0.789412191 | AC007279.2  |
| ENSG00000189280 | 1.845120827 | 1.029478846 | 0.818720232  | 0.699936285 | 0.789487046 | GJB5        |
| ENSG00000270728 | 20.1132675  | 23.55015005 | -0.222724653 | 0.700000841 | 0.7894958   | AL035413.1  |
| ENSG00000095319 | 1506.583571 | 1674.070312 | -0.152025629 | 0.700004821 | 0.7894958   | NUP188      |
| ENSG00000204764 | 135.9433154 | 155.2278831 | -0.191508881 | 0.700265533 | 0.789755559 | RANBP17     |
| ENSG00000287384 | 0.921306765 | 1.844058227 | -1.00030719  | 0.700327886 | 0.789791596 | AL096840.2  |
| ENSG00000256278 | 3.94189828  | 2.92428775  | 0.439686783  | 0.700378998 | 0.789796525 | AC048382.1  |
| ENSG00000264188 | 2.708474665 | 1.426156051 | 0.923756232  | 0.700393054 | 0.789796525 | AC106037.1  |
| ENSG00000206168 | 1.214547612 | 2.079026788 | -0.785888195 | 0.700445676 | 0.789821584 | Z69890.1    |
| ENSG00000228741 | 4.257847347 | 2.833398881 | 0.582599631  | 0.700637498 | 0.790003595 | AL445985.1  |
| ENSG00000262870 | 1.788421549 | 1.10029862  | 0.716531354  | 0.700736277 | 0.790080685 | CYCSP40     |
| ENSG00000235890 | 10.66659286 | 13.08316886 | -0.293104683 | 0.700884018 | 0.790212969 | TSPEAR-AS1  |
| ENSG00000273213 | 36.4500047  | 41.757352   | -0.200982094 | 0.701013123 | 0.790324234 | HIST2H3PS2  |
| ENSG00000178904 | 769.9809031 | 832.7508972 | -0.113350246 | 0.701268601 | 0.790577953 | DPY19L3     |
| ENSG00000145365 | 154.4922934 | 170.0162491 | -0.138169099 | 0.701619645 | 0.790939385 | TIFA        |
| ENSG00000250033 | 0.925067711 | 1.844058227 | -0.995577817 | 0.701686717 | 0.790949785 | SLC7A11-AS1 |
| ENSG00000013288 | 1311.12338  | 1410.617899 | -0.105700108 | 0.70170285  | 0.790949785 | MAN2B2      |
| ENSG00000125633 | 970.3233917 | 914.5883294 | 0.085404568  | 0.701720201 | 0.790949785 | CCDC93      |
| ENSG00000230524 | 1.541779519 | 0.723690511 | 1.091533062  | 0.701753847 | 1           | COL6A4P1    |
| ENSG00000276545 | 3.870083945 | 5.290189653 | -0.450445662 | 0.701755654 | 0.790955432 | PCDHGB9P    |
| ENSG00000215241 | 17.22495054 | 14.38189387 | 0.253167072  | 0.701879075 | 0.791040632 | LINC02449   |

|                 |             |             |              |             |             |            |
|-----------------|-------------|-------------|--------------|-------------|-------------|------------|
| ENSG00000111046 | 1.536764924 | 2.649180997 | -0.779002163 | 0.70189214  | 0.791040632 | MYF6       |
| ENSG00000087494 | 24.19642934 | 30.76852713 | -0.349953629 | 0.702047659 | 0.791154665 | PTHLH      |
| ENSG00000270130 | 2.961384939 | 4.554730781 | -0.620837155 | 0.702054224 | 0.791154665 | AC068790.7 |
| ENSG00000182545 | 1.215801261 | 0.693008929 | 0.786162412  | 0.702121679 | 1           | RNASE10    |
| ENSG00000171954 | 1.215801261 | 0.693008929 | 0.786162412  | 0.702121679 | 1           | CYP4F22    |
| ENSG00000248180 | 0.615458159 | 1.080229524 | -0.819741583 | 0.70217696  | 1           | GAPDHP60   |
| ENSG00000264187 | 3.931797819 | 2.355289417 | 0.723518403  | 0.702243793 | 0.791333969 | AC055811.2 |
| ENSG00000173230 | 2463.217989 | 2282.530198 | 0.110051649  | 0.70231825  | 0.791383548 | GOLGB1     |
| ENSG00000100376 | 771.2747641 | 625.8558078 | 0.301187432  | 0.702455053 | 0.791472358 | FAM118A    |
| ENSG00000180176 | 2.15473038  | 3.444975551 | -0.689420554 | 0.702457993 | 0.791472358 | TH         |
| ENSG00000278963 | 2.12199297  | 3.250145181 | -0.614170422 | 0.702629222 | 0.791624845 | AC005921.3 |
| ENSG00000205765 | 652.2825985 | 686.383894  | -0.0737169   | 0.702654269 | 0.791624845 | C5orf51    |
| ENSG00000145979 | 322.0749904 | 300.3825085 | 0.100019774  | 0.702718741 | 0.791639941 | TBC1D7     |
| ENSG00000259051 | 4.863205045 | 6.278374432 | -0.380061162 | 0.702728607 | 0.791639941 | HNRNPUP1   |
| ENSG00000250321 | 12.4386457  | 15.14559418 | -0.283142682 | 0.70279414  | 0.791667316 | AC079140.2 |
| ENSG00000167377 | 32.42089229 | 27.25705133 | 0.25582319   | 0.70281385  | 0.791667316 | ZNF23      |
| ENSG00000284512 | 2.976499995 | 4.188735158 | -0.495789638 | 0.702938792 | 0.791773726 | AC092718.8 |
| ENSG00000128185 | 921.6365642 | 862.9769646 | 0.094755799  | 0.703036798 | 0.791844446 | DGCR6L     |
| ENSG00000270948 | 3.636049674 | 2.629111901 | 0.48914727   | 0.703062534 | 0.791844446 | MTDHP1     |
| ENSG00000255753 | 3.389407643 | 2.149846562 | 0.652510844  | 0.703143657 | 0.791901485 | AC009533.2 |
| ENSG00000260989 | 1.535511275 | 0.723690511 | 1.086299981  | 0.70318505  | 1           | AL133297.2 |
| ENSG00000020181 | 2072.807815 | 1864.368197 | 0.152964567  | 0.703190565 | 0.791919986 | ADGRA2     |
| ENSG00000255585 | 9.300894683 | 12.00293934 | -0.363506037 | 0.703238092 | 0.791939182 | AL590627.1 |
| ENSG00000157911 | 386.7781178 | 359.7506746 | 0.103812411  | 0.703273964 | 0.791945253 | PEX10      |
| ENSG00000116717 | 934.2801881 | 1084.470589 | -0.215217334 | 0.703333904 | 0.791978424 | GADD45A    |
| ENSG00000136143 | 745.1163742 | 804.04998   | -0.110200183 | 0.703407324 | 0.792003556 | SUCLA2     |
| novel.718       | 60.79264163 | 50.45588067 | 0.26826161   | 0.703417191 | 0.792003556 | -          |
| ENSG00000122507 | 266.8726431 | 287.0356501 | -0.105461347 | 0.703521274 | 0.79208642  | BBS9       |
| ENSG00000104774 | 1333.11317  | 1420.227826 | -0.09109722  | 0.703689447 | 0.792237247 | MAN2B1     |
| ENSG00000271155 | 7.623293122 | 6.054018356 | 0.32666278   | 0.703725664 | 0.792237247 | AL161729.1 |
| ENSG00000122490 | 1363.841399 | 1464.761979 | -0.102957917 | 0.703746716 | 0.792237247 | PQLC1      |
| ENSG00000266315 | 2.359788188 | 1.467450118 | 0.700717516  | 0.703784692 | 0.792245671 | MIR4668    |
| ENSG00000219294 | 1.481319294 | 0.713078025 | 1.055194445  | 0.703926253 | 1           | PIP5K1P1   |
| ENSG00000243979 | 1.481319294 | 0.713078025 | 1.055194445  | 0.703926253 | 1           | AC087752.1 |
| ENSG00000231952 | 4.235139127 | 3.169868797 | 0.40810306   | 0.703992785 | 0.792445585 | DPY19L1P2  |
| ENSG00000105127 | 705.7819156 | 753.1614151 | -0.09358545  | 0.704054033 | 0.792480194 | AKAP8      |
| ENSG00000272274 | 1.511549406 | 2.50754145  | -0.729940397 | 0.704115337 | 0.792514863 | LINC00551  |
| ENSG00000274403 | 11.91484679 | 9.425733988 | 0.343839808  | 0.7041676   | 0.792539353 | AC090510.2 |
| ENSG00000226453 | 5.829856978 | 4.147312696 | 0.503017503  | 0.704265469 | 0.792615168 | LINC02542  |
| ENSG00000100097 | 30386.53485 | 32668.0826  | -0.104438727 | 0.704312291 | 0.792633528 | LGALS1     |
| ENSG00000198783 | 315.4341328 | 293.8686048 | 0.101981369  | 0.70436868  | 0.792662653 | ZNF830     |
| ENSG00000138587 | 58.12525264 | 69.87451477 | -0.267651038 | 0.704474466 | 0.79274499  | MNS1       |
| ENSG00000187792 | 175.7833685 | 190.3940903 | -0.113882471 | 0.704528076 | 0.79274499  | ZNF70      |
| ENSG00000179965 | 231.7613692 | 248.806213  | -0.103198039 | 0.704533383 | 0.79274499  | ZNF771     |
| ENSG00000232218 | 1.229662669 | 2.099095884 | -0.783339667 | 0.704627164 | 0.792796816 | AL021937.2 |
| ENSG00000252503 | 2.11063886  | 1.436768536 | 0.556900632  | 0.704669291 | 0.792796816 | RNU6-531P  |
| ENSG00000134146 | 134.9820619 | 125.7316718 | 0.103326492  | 0.704670986 | 0.792796816 | DPH6       |
| ENSG00000171495 | 2.775203133 | 1.406086955 | 0.973971216  | 0.704819317 | 0.792929362 | MROH2B     |
| ENSG00000254373 | 3.61842732  | 2.406040094 | 0.573910861  | 0.704855837 | 0.792936112 | AC112191.2 |
| ENSG00000171509 | 3.983482502 | 5.514545729 | -0.482507657 | 0.704915037 | 0.792940029 | RXFP1      |
| ENSG00000223461 | 1.233423615 | 2.406040094 | -0.973893928 | 0.704920359 | 0.792940029 | AC004471.1 |

|                 |             |             |              |             |             |            |
|-----------------|-------------|-------------|--------------|-------------|-------------|------------|
| ENSG00000287257 | 2.947523532 | 1.854670712 | 0.684961397  | 0.704958145 | 0.792948202 | AC111182.2 |
| ENSG00000236552 | 1924.329084 | 2151.511943 | -0.161005478 | 0.705150121 | 0.793105364 | RPL13AP5   |
| ENSG00000134762 | 7.398034391 | 11.82128999 | -0.679430207 | 0.705158921 | 0.793105364 | DSC3       |
| ENSG00000203872 | 14.7303805  | 17.49626009 | -0.247916536 | 0.705249158 | 0.793172519 | C6orf163   |
| ENSG00000001629 | 1160.149338 | 1233.852914 | -0.088766525 | 0.705375456 | 0.79327945  | ANKIB1     |
| ENSG00000119242 | 88.78161398 | 100.2953647 | -0.177581442 | 0.705405301 | 0.79327945  | CCDC92     |
| ENSG00000182366 | 1.232169966 | 2.099095884 | -0.781080488 | 0.705464439 | 0.793311616 | FAM87A     |
| ENSG00000228073 | 2.391271949 | 3.506338714 | -0.554588753 | 0.705600821 | 0.79343064  | AC133106.1 |
| ENSG00000260708 | 66.88382842 | 73.58663467 | -0.136583907 | 0.70576508  | 0.793557377 | AL118516.1 |
| ENSG00000231884 | 2.127007565 | 1.41669944  | 0.577060998  | 0.705774616 | 0.793557377 | NDUFB1P1   |
| ENSG00000222046 | 11.97656067 | 14.6438196  | -0.281738379 | 0.705816172 | 0.793569757 | DCDC2B     |
| ENSG00000285878 | 2.683259148 | 1.742556871 | 0.613652075  | 0.705881133 | 0.793608452 | AP002961.1 |
| ENSG00000200483 | 1.539272221 | 0.774441189 | 1.015577233  | 0.705947642 | 1           | RNU6-1017P |
| ENSG00000258018 | 0.879722543 | 1.742556871 | -0.982716568 | 0.705987539 | 1           | LINC02457  |
| ENSG00000161970 | 722.6814533 | 802.1334335 | -0.15050361  | 0.706058121 | 0.793773087 | RPL26      |
| ENSG00000108255 | 2.405133356 | 1.426156051 | 0.75216357   | 0.706190841 | 0.793887942 | CRYBA1     |
| ENSG00000280276 | 1.538018572 | 0.774441189 | 1.014545776  | 0.706243326 | 1           | AC009229.4 |
| ENSG00000268938 | 6.311786929 | 8.631095309 | -0.441711339 | 0.706265531 | 0.793937554 | AC005387.1 |
| ENSG00000244198 | 8.908116686 | 12.28164211 | -0.463385994 | 0.706329403 | 0.793946473 | AC004889.1 |
| ENSG00000234817 | 1.835020366 | 2.842855491 | -0.63796616  | 0.706334582 | 0.793946473 | AL136309.2 |
| ENSG00000197183 | 965.2073911 | 901.4584382 | 0.098565105  | 0.706372867 | 0.793948458 | NOL4L      |
| ENSG00000236417 | 1.232169966 | 2.079026788 | -0.769929298 | 0.706436954 | 0.793948458 | CTSLP1     |
| ENSG00000222317 | 2.666890443 | 3.903015919 | -0.545889377 | 0.706440642 | 0.793948458 | RNA5SP118  |
| ENSG00000144362 | 24.17859353 | 20.46312618 | 0.236383051  | 0.706470239 | 0.793948458 | PHOSPHO2   |
| ENSG00000124302 | 3.646150135 | 2.406040094 | 0.583891158  | 0.706489142 | 0.793948458 | CHST8      |
| ENSG00000285922 | 2.751312536 | 1.702418679 | 0.670548004  | 0.706546712 | 0.793978811 | AC104453.1 |
| ENSG00000123091 | 1945.460618 | 1801.467719 | 0.110955294  | 0.706717696 | 0.794106651 | RNF11      |
| ENSG00000225200 | 13.55616346 | 15.85751633 | -0.222603333 | 0.706721604 | 0.794106651 | AC246787.1 |
| ENSG00000168172 | 1305.542634 | 1386.342351 | -0.086413422 | 0.70707023  | 0.794464025 | HOOK3      |
| ENSG00000232077 | 1.801029308 | 1.029478846 | 0.789184178  | 0.707203043 | 0.794569326 | LINC01031  |
| ENSG00000279423 | 3.94189828  | 2.954969332 | 0.430165662  | 0.707225114 | 0.794569326 | AL445363.3 |
| ENSG00000149743 | 471.6627514 | 440.8970713 | 0.097885361  | 0.707317645 | 0.794638923 | TRPT1      |
| ENSG00000116580 | 1007.809413 | 934.8281613 | 0.108660105  | 0.707390601 | 0.794684559 | GON4L      |
| ENSG00000105429 | 2676.460737 | 2503.371466 | 0.096566191  | 0.707419441 | 0.794684559 | MEGF8      |
| ENSG00000142698 | 38.53708113 | 55.15353559 | -0.515634652 | 0.707479929 | 0.794718148 | C1orf94    |
| ENSG00000231655 | 1.466204238 | 0.693008929 | 1.073599019  | 0.707574607 | 1           | AC011742.2 |
| ENSG00000241693 | 1.466204238 | 0.693008929 | 1.073599019  | 0.707574607 | 1           | RN7SL704P  |
| ENSG00000287680 | 1.466204238 | 0.693008929 | 1.073599019  | 0.707574607 | 1           | AC093330.3 |
| ENSG00000277007 | 16.28226048 | 18.83255476 | -0.204883578 | 0.70768491  | 0.794914035 | AC096642.1 |
| ENSG00000272969 | 4.26536924  | 3.220619475 | 0.401413304  | 0.707815319 | 0.79499825  | AC024243.1 |
| ENSG00000142959 | 9.085736413 | 7.449492825 | 0.280434127  | 0.707821082 | 0.79499825  | BEST4      |
| ENSG00000259719 | 2.751312536 | 1.742556871 | 0.644647108  | 0.708011799 | 0.795119002 | LINC02284  |
| ENSG00000188037 | 3.388153995 | 2.058957692 | 0.702923672  | 0.708019552 | 0.795119002 | CLCN1      |
| ENSG00000160282 | 6.023560676 | 4.534533291 | 0.428993803  | 0.708020404 | 0.795119002 | FTCD       |
| ENSG00000264655 | 0.616711807 | 1.548882377 | -1.323781063 | 0.708096333 | 1           | PPIAP54    |
| ENSG00000150991 | 15276.24996 | 16352.04138 | -0.09816205  | 0.708097346 | 0.795171039 | UBC        |
| ENSG00000257740 | 22.28443786 | 18.79485671 | 0.243699945  | 0.708184418 | 0.795234445 | AC073896.3 |
| ENSG00000081692 | 162.6848449 | 147.9461351 | 0.135137379  | 0.708297174 | 0.795326686 | JMJD4      |
| ENSG00000106460 | 1110.468338 | 1047.620675 | 0.083904766  | 0.708331141 | 0.795330454 | TMEM106B   |
| ENSG00000206127 | 1.804790254 | 2.944356846 | -0.699144853 | 0.708446526 | 0.795407813 | GOLGA8O    |
| ENSG00000286307 | 2.694613258 | 1.773238453 | 0.601440515  | 0.708461268 | 0.795407813 | AC017028.1 |

|                 |             |             |              |             |             |            |
|-----------------|-------------|-------------|--------------|-------------|-------------|------------|
| ENSG00000228201 | 8.474039201 | 6.93941751  | 0.296581965  | 0.708505171 | 0.795422731 | AL022341.1 |
| ENSG00000265778 | 11.46948647 | 13.94978319 | -0.282737658 | 0.708610906 | 0.795507062 | AC018413.1 |
| ENSG00000213699 | 684.8534152 | 641.8893107 | 0.093039906  | 0.708674983 | 0.795544622 | SLC35F6    |
| ENSG00000108861 | 1692.275079 | 1553.953433 | 0.123222976  | 0.708902086 | 0.795765181 | DUSP3      |
| ENSG00000233392 | 2.709728314 | 1.762625967 | 0.613576103  | 0.708951391 | 0.795786145 | AC104809.2 |
| ENSG00000279344 | 3.968367446 | 2.842855491 | 0.473905271  | 0.709032111 | 0.795842367 | AC007342.6 |
| ENSG00000177479 | 1096.071899 | 1155.801274 | -0.076595468 | 0.709093876 | 0.795847709 | ARIH2      |
| ENSG00000285589 | 38.83848461 | 34.77163174 | 0.160614414  | 0.709127486 | 0.795847709 | AC010422.8 |
| ENSG00000257698 | 92.08111456 | 83.32278049 | 0.144605498  | 0.709128766 | 0.795847709 | GIHCG      |
| ENSG00000104375 | 382.0914923 | 402.087753  | -0.073441296 | 0.709530835 | 0.796264552 | STK3       |
| ENSG00000269399 | 19.73345327 | 22.56324955 | -0.19495806  | 0.70959408  | 0.796301132 | AC008764.6 |
| ENSG00000226808 | 5.238289417 | 7.418811243 | -0.507920153 | 0.709718785 | 0.796406675 | LINC00840  |
| ENSG00000269403 | 1.850135422 | 0.774441189 | 1.272078994  | 0.709827508 | 1           | AC008750.8 |
| ENSG00000137714 | 518.6235673 | 557.9707031 | -0.106104622 | 0.709895549 | 0.796570625 | FDX1       |
| ENSG00000279691 | 1.817398012 | 1.069617038 | 0.760732992  | 0.710232941 | 0.796820835 | AC113410.3 |
| ENSG00000254760 | 1.817398012 | 1.069617038 | 0.760732992  | 0.710232941 | 0.796820835 | AC008750.1 |
| ENSG00000286342 | 1.817398012 | 1.069617038 | 0.760732992  | 0.710232941 | 0.796820835 | AC073210.3 |
| ENSG00000170322 | 567.0232803 | 534.0323736 | 0.086860786  | 0.710241211 | 0.796820835 | NFRKB      |
| ENSG00000236890 | 0.879722543 | 1.722487775 | -0.968202751 | 0.710283605 | 1           | AC016027.5 |
| ENSG00000285676 | 6.596180964 | 8.284141301 | -0.324261234 | 0.71036047  | 0.79692022  | AL158212.5 |
| ENSG00000259635 | 3.561728042 | 2.486316478 | 0.519341739  | 0.710469295 | 0.797007891 | AC100830.1 |
| ENSG00000206897 | 2.653029035 | 3.9336975   | -0.561382576 | 0.710594195 | 0.797113587 | SNORA9B    |
| ENSG00000207336 | 3.020591515 | 2.191140629 | 0.474100118  | 0.710658627 | 0.797151445 | RNU6-658P  |
| ENSG00000279494 | 3.035706571 | 2.191140629 | 0.479144234  | 0.710726837 | 0.797193539 | AL117328.2 |
| ENSG00000171222 | 1009.628105 | 1070.371962 | -0.084285888 | 0.711018481 | 0.797483429 | SCAND1     |
| ENSG00000272923 | 28.7436144  | 24.92542703 | 0.211283518  | 0.711046674 | 0.797483429 | AC092139.1 |
| ENSG00000269473 | 5.478663203 | 6.84852864  | -0.322326337 | 0.711455378 | 0.797907372 | AC012313.8 |
| ENSG00000230513 | 50.07128697 | 44.23177172 | 0.176491866  | 0.711567124 | 0.797998249 | THAP7-AS1  |
| ENSG00000250492 | 2.773949485 | 4.209960129 | -0.610257012 | 0.711672559 | 0.798082042 | INTS6P1    |
| novel.1036      | 11.27187928 | 8.203736523 | 0.464117958  | 0.711735616 | 0.798118307 | -          |
| ENSG00000164385 | 3.385646697 | 2.099095884 | 0.679085033  | 0.711877826 | 0.798243323 | LINC01600  |
| ENSG00000243620 | 7.070802485 | 4.810924314 | 0.544845451  | 0.712287544 | 0.798668279 | AC092957.1 |
| ENSG00000163633 | 1.49643435  | 2.435565801 | -0.70716459  | 0.712327328 | 0.798678419 | C4orf36    |
| ENSG00000184106 | 1.203193503 | 2.038888596 | -0.772591458 | 0.712514588 | 0.798853904 | TREML3P    |
| ENSG00000224566 | 2.376156893 | 1.406086955 | 0.752874182  | 0.712766986 | 0.799068395 | FAM96AP2   |
| ENSG00000248546 | 2.123246619 | 1.436768536 | 0.562925728  | 0.712767409 | 0.799068395 | ANP32C     |
| ENSG00000105722 | 1722.244302 | 1886.243682 | -0.131081861 | 0.712945845 | 0.799233949 | ERF        |
| ENSG00000182841 | 185.1769626 | 167.3406246 | 0.145715812  | 0.713015464 | 0.799277506 | RRP7BP     |
| ENSG00000042429 | 144.6711904 | 157.9587063 | -0.125149692 | 0.713145806 | 0.799368298 | MED17      |
| ENSG00000247556 | 2195.288502 | 2069.347842 | 0.085159584  | 0.713157991 | 0.799368298 | OIP5-AS1   |
| ENSG00000275055 | 11.15980565 | 8.624207238 | 0.362653749  | 0.713401739 | 0.799607013 | AC011468.5 |
| ENSG00000234459 | 5.998345159 | 4.62670643  | 0.373778378  | 0.713447417 | 0.799623715 | AC002064.2 |
| ENSG00000281809 | 1.54052587  | 0.774441189 | 1.015399627  | 0.713557933 | 1           | LINC01394  |
| ENSG00000269570 | 2.712235611 | 1.874739808 | 0.554795868  | 0.713575075 | 0.799732294 | AP001350.1 |
| ENSG00000227220 | 1.186824798 | 2.038888596 | -0.787408713 | 0.713721602 | 0.799862008 | AL133346.1 |
| ENSG00000075785 | 6159.989856 | 5866.518917 | 0.070459701  | 0.713781539 | 0.799894676 | RAB7A      |
| ENSG00000232133 | 1.814890715 | 1.049547942 | 0.778989363  | 0.713817943 | 0.799900969 | IMPDH1P10  |
| ENSG00000204406 | 334.5815039 | 311.6109939 | 0.103362747  | 0.713853636 | 0.799906466 | MBD5       |
| ENSG00000225039 | 0.894837599 | 1.782695063 | -0.992053636 | 0.713944156 | 1           | LINC01058  |
| ENSG00000204446 | 3.03696022  | 2.140389951 | 0.500886886  | 0.714011171 | 0.800048485 | C9orf170   |
| ENSG00000286319 | 5.141330836 | 3.872334337 | 0.400379661  | 0.714095121 | 0.800108044 | AL135978.2 |

|                 |             |             |              |             |             |             |
|-----------------|-------------|-------------|--------------|-------------|-------------|-------------|
| ENSG00000233045 | 3.955759687 | 5.115428379 | -0.365463192 | 0.714219197 | 0.800188898 | AC097523.1  |
| ENSG00000026103 | 480.9740302 | 557.902126  | -0.214428892 | 0.714228881 | 0.800188898 | FAS         |
| ENSG00000281883 | 1.201939854 | 1.803920035 | -0.578591025 | 0.7143142   | 0.800215472 | AL512506.3  |
| ENSG00000257043 | 1.201939854 | 1.803920035 | -0.578591025 | 0.7143142   | 0.800215472 | AP006296.1  |
| ENSG00000255967 | 3.946912875 | 2.884149558 | 0.453880663  | 0.714378278 | 0.80025275  | HADHAP2     |
| ENSG00000274038 | 0.600343103 | 1.130980201 | -0.892774476 | 0.714454073 | 1           | AC007014.2  |
| ENSG00000253632 | 0.600343103 | 1.130980201 | -0.892774476 | 0.714454073 | 1           | AC084026.2  |
| ENSG00000230409 | 137.0483958 | 123.2246442 | 0.155435909  | 0.714482    | 0.800334433 | TCEA1P2     |
| ENSG00000168542 | 27857.30458 | 19744.87068 | 0.49656016   | 0.714595439 | 0.800426992 | COL3A1      |
| ENSG00000251414 | 12.53030495 | 15.56948534 | -0.308758123 | 0.714815258 | 0.800638697 | AC138956.2  |
| ENSG00000212237 | 1.232169966 | 2.355289417 | -0.947482913 | 0.714872295 | 0.800668065 | RNA5SP18    |
| ENSG00000142556 | 194.2460018 | 182.0253059 | 0.094223068  | 0.714960332 | 0.800732149 | ZNF614      |
| ENSG00000261430 | 0.601596751 | 1.130980201 | -0.890792552 | 0.71504782  | 1           | AL031600.2  |
| ENSG00000101246 | 1148.12937  | 1201.845733 | -0.066058356 | 0.715061847 | 0.800811322 | ARFRP1      |
| ENSG00000135241 | 749.9797645 | 805.2271436 | -0.102200021 | 0.715168252 | 0.800895964 | PNPLA8      |
| ENSG00000172955 | 8.564729538 | 6.797777963 | 0.329504243  | 0.715318558 | 0.801029759 | ADH6        |
| ENSG00000202290 | 2.361041837 | 1.386017859 | 0.761051553  | 0.715360484 | 0.801042184 | RNA5SP37    |
| ENSG00000116711 | 453.3091696 | 416.6480982 | 0.120988885  | 0.715542064 | 0.801210979 | PLA2G4A     |
| ENSG00000186918 | 961.6253909 | 1087.677648 | -0.177448345 | 0.715690002 | 0.801342094 | ZNF395      |
| ENSG00000286137 | 0.908699006 | 1.518200796 | -0.719081407 | 0.71574231  | 1           | AC211486.8  |
| ENSG00000165288 | 348.101754  | 374.4232364 | -0.104738676 | 0.715797485 | 0.801427902 | BRWD3       |
| ENSG00000102466 | 38.98655841 | 29.9363188  | 0.3789606    | 0.715882868 | 0.80148896  | FGF14       |
| ENSG00000121481 | 378.0966835 | 353.5830357 | 0.096962981  | 0.716008163 | 0.801594694 | RNF2        |
| ENSG00000180573 | 393.8562684 | 336.6226866 | 0.226738021  | 0.716164432 | 0.801690734 | HIST1H2AC   |
| ENSG00000267321 | 156.9327858 | 147.4448273 | 0.090708606  | 0.716183629 | 0.801690734 | SNHG30      |
| ENSG00000221994 | 56.32382388 | 41.39323576 | 0.444713362  | 0.716186518 | 0.801690734 | ZNF630      |
| ENSG00000257711 | 2.15473038  | 1.161661783 | 0.910459157  | 0.716344509 | 0.80183304  | AC079385.2  |
| ENSG00000164330 | 234.5430812 | 201.4715391 | 0.218627197  | 0.716406706 | 0.801868112 | EBF1        |
| ENSG00000235586 | 4.869473288 | 3.668047357 | 0.416251748  | 0.716444735 | 0.801876132 | AC011247.1  |
| ENSG00000267658 | 1.466204238 | 2.446178286 | -0.735092217 | 0.716523613 | 0.801927383 | AC099811.3  |
| ENSG00000280402 | 6.28782506  | 4.82970914  | 0.395825557  | 0.71655314  | 0.801927383 | AC093525.10 |
| ENSG00000252496 | 1.804790254 | 1.060160428 | 0.762952449  | 0.716609307 | 0.801927383 | RNA5SP33    |
| ENSG00000128655 | 2.771442187 | 4.147312696 | -0.575340295 | 0.716615668 | 0.801927383 | PDE11A      |
| ENSG00000263069 | 45.29730515 | 51.73671994 | -0.191411039 | 0.716651569 | 0.801927383 | AC124319.3  |
| ENSG00000166436 | 282.1478939 | 306.5625793 | -0.11954061  | 0.716675721 | 0.801927383 | TRIM66      |
| ENSG00000114316 | 1230.784184 | 1295.970376 | -0.074336661 | 0.716780559 | 0.801983057 | USP4        |
| ENSG00000285416 | 8.663981953 | 10.6500432  | -0.296999741 | 0.716787212 | 0.801983057 | AC137630.5  |
| ENSG00000272489 | 1.493927053 | 0.774441189 | 0.977688731  | 0.716820332 | 1           | AL132656.3  |
| ENSG00000259295 | 23.33271985 | 29.52029601 | -0.33699389  | 0.71688369  | 0.802056462 | CSPG4P12    |
| ENSG00000126804 | 889.7802561 | 844.3660899 | 0.075516809  | 0.716915901 | 0.802057961 | ZBTB1       |
| ENSG00000259967 | 1.814890715 | 1.060160428 | 0.769777398  | 0.717068053 | 0.802176168 | AC087761.1  |
| ENSG00000175003 | 3.931797819 | 2.904218654 | 0.442692089  | 0.717092031 | 0.802176168 | SLC22A1     |
| ENSG00000155511 | 20.28232515 | 14.31235837 | 0.498074805  | 0.717114186 | 0.802176168 | GRIA1       |
| ENSG00000138834 | 2947.243864 | 2662.598515 | 0.146626256  | 0.71715644  | 0.802188895 | MAPK8IP3    |
| ENSG00000241293 | 3.29495636  | 2.079026788 | 0.655277661  | 0.717313763 | 0.802330329 | PPATP1      |
| ENSG00000262227 | 12.40583702 | 10.24031337 | 0.283042751  | 0.717406403 | 0.802399403 | AC004771.3  |
| ENSG00000183323 | 20.08959037 | 23.15475712 | -0.208420082 | 0.717463333 | 0.802404859 | CCDC125     |
| ENSG00000229325 | 7.57167971  | 9.608667603 | -0.336181314 | 0.717473048 | 0.802404859 | ACAP2-IT1   |
| ENSG00000253238 | 2.052685933 | 1.049547942 | 0.964499382  | 0.717537318 | 0.802442195 | AC034114.2  |
| ENSG00000205423 | 342.6676371 | 360.6448412 | -0.074153499 | 0.717627192 | 0.80250816  | CNEP1R1     |
| ENSG00000160051 | 73.17416077 | 79.83920781 | -0.127013822 | 0.717688489 | 0.802542164 | IQCC        |

|                 |             |             |              |             |             |            |
|-----------------|-------------|-------------|--------------|-------------|-------------|------------|
| ENSG00000267758 | 1.511549406 | 2.52645467  | -0.739950616 | 0.717916643 | 0.802762742 | AC099811.4 |
| ENSG00000234345 | 1.201939854 | 0.723690511 | 0.740739345  | 0.718198393 | 1           | AC234782.3 |
| ENSG00000248468 | 1.201939854 | 0.723690511 | 0.740739345  | 0.718198393 | 1           | AC107027.1 |
| ENSG00000134291 | 890.452627  | 822.3369916 | 0.114405266  | 0.718225375 | 0.803026313 | TMEM106C   |
| ENSG00000205212 | 3.812131018 | 2.038888596 | 0.89613783   | 0.718226704 | 0.803026313 | CCDC144NL  |
| ENSG00000274290 | 7.064534242 | 5.339784455 | 0.397901773  | 0.718283171 | 0.803026313 | HIST1H2BE  |
| ENSG00000187094 | 23.11917089 | 16.25432193 | 0.506455722  | 0.718294703 | 0.803026313 | CCK        |
| ENSG00000138435 | 8.306804669 | 6.023336774 | 0.458768678  | 0.718306898 | 0.803026313 | CHRNA1     |
| ENSG00000177613 | 698.2410196 | 750.3720197 | -0.104345537 | 0.718395963 | 0.803091326 | CSTF2T     |
| ENSG00000244307 | 0.308355904 | 0.743759607 | -1.182517261 | 0.718674884 | 1           | RN7SL395P  |
| ENSG00000231776 | 0.308355904 | 0.743759607 | -1.182517261 | 0.718674884 | 1           | LINC01611  |
| ENSG00000162006 | 0.308355904 | 0.743759607 | -1.182517261 | 0.718674884 | 1           | MSLNL      |
| ENSG00000214922 | 0.308355904 | 0.743759607 | -1.182517261 | 0.718674884 | 1           | HLA-F-AS1  |
| ENSG00000258731 | 0.308355904 | 0.743759607 | -1.182517261 | 0.718674884 | 1           | AL356020.1 |
| ENSG00000266306 | 0.308355904 | 0.743759607 | -1.182517261 | 0.718674884 | 1           | AC061975.5 |
| ENSG00000173818 | 344.4358303 | 322.536495  | 0.095249241  | 0.71870699  | 0.803404454 | ENDOV      |
| novel.145       | 0.307102255 | 0.743759607 | -1.182523795 | 0.71875959  | 1           | -          |
| ENSG00000230184 | 0.307102255 | 0.743759607 | -1.182523795 | 0.71875959  | 1           | SMYD3-IT1  |
| ENSG00000196890 | 0.307102255 | 0.743759607 | -1.182523795 | 0.71875959  | 1           | HIST3H2BB  |
| ENSG00000245928 | 0.307102255 | 0.743759607 | -1.182523795 | 0.71875959  | 1           | AC112719.2 |
| ENSG00000202150 | 0.307102255 | 0.743759607 | -1.182523795 | 0.71875959  | 1           | RNU6-407P  |
| ENSG00000141448 | 79.79626821 | 106.2278938 | -0.413333665 | 0.718796692 | 0.803470157 | GATA6      |
| ENSG00000172046 | 1142.590419 | 1216.116237 | -0.089914305 | 0.719063283 | 0.803733572 | USP19      |
| ENSG00000165259 | 85.38120823 | 78.68931439 | 0.115707878  | 0.719271429 | 0.803916205 | HDX        |
| ENSG00000174775 | 38.64345599 | 34.12351289 | 0.177665441  | 0.719288561 | 0.803916205 | HRAS       |
| ENSG00000169609 | 390.7582666 | 365.6105049 | 0.095569959  | 0.719377405 | 0.803963162 | C15orf40   |
| ENSG00000267062 | 0.909952655 | 1.782695063 | -0.972316279 | 0.719392464 | 0.803963162 | AC018761.2 |
| ENSG00000134533 | 29.25724158 | 37.10253253 | -0.345977676 | 0.719624533 | 0.804187922 | RERG       |
| ENSG00000280106 | 28.99401738 | 36.06033938 | -0.310831073 | 0.7196606   | 0.804193636 | AC008555.7 |
| ENSG00000232587 | 0.293240848 | 0.743759607 | -1.182596337 | 0.719702529 | 1           | EEF1A1P3   |
| ENSG00000207631 | 0.293240848 | 0.743759607 | -1.182596337 | 0.719702529 | 1           | MIR641     |
| ENSG00000273555 | 0.293240848 | 0.743759607 | -1.182596337 | 0.719702529 | 1           | MIR6812    |
| ENSG00000199471 | 0.293240848 | 0.743759607 | -1.182596337 | 0.719702529 | 1           | RF00019    |
| ENSG00000230046 | 0.293240848 | 0.743759607 | -1.182596337 | 0.719702529 | 1           | BIRC6-AS1  |
| ENSG00000207002 | 0.293240848 | 0.743759607 | -1.182596337 | 0.719702529 | 1           | RF00392    |
| ENSG00000254884 | 0.293240848 | 0.743759607 | -1.182596337 | 0.719702529 | 1           | PRR13P2    |
| ENSG00000284059 | 0.293240848 | 0.743759607 | -1.182596337 | 0.719702529 | 1           | MIR5572    |
| ENSG00000260017 | 0.293240848 | 0.743759607 | -1.182596337 | 0.719702529 | 1           | AC138811.1 |
| ENSG00000243053 | 0.293240848 | 0.743759607 | -1.182596337 | 0.719702529 | 1           | RPL31P58   |
| ENSG00000286890 | 0.293240848 | 0.743759607 | -1.182596337 | 0.719702529 | 1           | AC055840.1 |
| ENSG00000267541 | 0.293240848 | 0.743759607 | -1.182596337 | 0.719702529 | 1           | MTCO2P2    |
| ENSG00000284031 | 0.293240848 | 0.743759607 | -1.182596337 | 0.719702529 | 1           | MIR4761    |
| ENSG00000242876 | 0.293240848 | 0.743759607 | -1.182596337 | 0.719702529 | 1           | RN7SL812P  |
| ENSG00000215464 | 0.293240848 | 0.743759607 | -1.182596337 | 0.719702529 | 1           | AP000354.1 |
| ENSG00000134489 | 2.387511003 | 1.456837632 | 0.720137777  | 0.719904044 | 0.804431077 | HRH4       |
| ENSG00000187736 | 1.541779519 | 2.496928964 | -0.702360326 | 0.720004958 | 0.804509239 | NHEJ1      |
| ENSG00000248925 | 3.341555177 | 2.496928964 | 0.41532018   | 0.720264871 | 0.804765046 | AC021087.1 |
| ENSG00000252355 | 2.052685933 | 1.060160428 | 0.953535483  | 0.720595365 | 0.805094556 | RN7SKP287  |
| ENSG00000230772 | 1.803536605 | 1.069617038 | 0.751729331  | 0.720652746 | 0.805094556 | VN1R108P   |
| ENSG00000239219 | 1.803536605 | 1.069617038 | 0.751729331  | 0.720652746 | 0.805094556 | AC008040.1 |
| ENSG00000269463 | 6.051283491 | 4.809640044 | 0.345475635  | 0.720879623 | 0.805313389 | AP001160.4 |

|                 |             |             |              |             |             |             |
|-----------------|-------------|-------------|--------------|-------------|-------------|-------------|
| ENSG00000272137 | 0.600343103 | 1.110911105 | -0.872480828 | 0.720887706 | 1           | AL451064.1  |
| ENSG00000170248 | 3350.717656 | 3535.96262  | -0.077577096 | 0.721017436 | 0.805396157 | PDCD6IP     |
| ENSG00000285725 | 23.1641604  | 19.93529352 | 0.215688762  | 0.721072745 | 0.805396157 | AC004967.2  |
| ENSG00000221990 | 79.9588883  | 87.77999112 | -0.136467266 | 0.721099081 | 0.805396157 | EXOC3-AS1   |
| ENSG00000115947 | 457.3838417 | 428.1531161 | 0.094728688  | 0.721124766 | 0.805396157 | ORC4        |
| ENSG00000236778 | 34.01811744 | 29.2323122  | 0.21839924   | 0.721125829 | 0.805396157 | INTS6-AS1   |
| ENSG00000254615 | 132.3499889 | 141.7685729 | -0.098283228 | 0.721142189 | 0.805396157 | AC027031.2  |
| ENSG00000266236 | 6.425185486 | 8.755105905 | -0.44543529  | 0.72117071  | 0.805396157 | NARF-IT1    |
| ENSG00000274211 | 40.11460391 | 31.6336004  | 0.343356046  | 0.721241473 | 0.805411504 | SOCS7       |
| ENSG00000244171 | 600.2474219 | 641.9799171 | -0.09644212  | 0.721246451 | 0.805411504 | PBX2P1      |
| ENSG00000218757 | 0.908699006 | 1.4981317   | -0.704442657 | 0.721261512 | 1           | AL121952.1  |
| ENSG00000286599 | 18.45210592 | 21.13722189 | -0.201757524 | 0.721331472 | 0.805471826 | AC110611.1  |
| ENSG00000213253 | 0.586481695 | 1.426156051 | -1.275755199 | 0.72133388  | 1           | RPL12P42    |
| ENSG00000279337 | 0.586481695 | 1.426156051 | -1.275755199 | 0.72133388  | 1           | AC127024.7  |
| ENSG00000259931 | 0.921306765 | 1.742556871 | -0.92924449  | 0.721376645 | 1           | AC105036.1  |
| ENSG00000261528 | 0.601596751 | 1.110911105 | -0.870497885 | 0.721483034 | 1           | AC002400.1  |
| ENSG00000280620 | 3.313832363 | 4.382281258 | -0.393602911 | 0.72154199  | 0.805672273 | SCAANT1     |
| ENSG00000185338 | 63.11370855 | 76.87982491 | -0.283675069 | 0.721654148 | 0.805762878 | SOCS1       |
| ENSG00000229162 | 0.615458159 | 1.130980201 | -0.86856036  | 0.72173385  | 1           | AL445471.1  |
| ENSG00000257875 | 0.615458159 | 1.130980201 | -0.86856036  | 0.72173385  | 1           | AC089998.3  |
| ENSG00000232970 | 0.615458159 | 1.130980201 | -0.86856036  | 0.72173385  | 1           | POLHP1      |
| ENSG00000233868 | 8.720681231 | 10.6004484  | -0.284276485 | 0.72179166  | 0.805881784 | AC009302.1  |
| ENSG00000093100 | 5.12621578  | 6.521515334 | -0.342502989 | 0.721888695 | 0.805955489 | AC016026.1  |
| ENSG00000176244 | 71.15513772 | 58.95612449 | 0.269674956  | 0.721927687 | 0.805964388 | ACBD7       |
| ENSG00000269947 | 11.82945579 | 9.998328342 | 0.239834992  | 0.721978223 | 0.805986173 | AC135178.5  |
| ENSG00000272140 | 24.14084152 | 21.50308912 | 0.167461151  | 0.722023495 | 0.80600208  | AC022400.6  |
| ENSG00000228544 | 13.46421948 | 16.53058456 | -0.297634135 | 0.722080928 | 0.806031561 | CCDC183-AS1 |
| ENSG00000162551 | 183.1290187 | 140.1366013 | 0.385302081  | 0.72218213  | 0.806109895 | ALPL        |
| ENSG00000158286 | 298.6072749 | 321.7062472 | -0.106853029 | 0.72225935  | 0.806161454 | RNF207      |
| ENSG00000129465 | 3.049567979 | 2.099095884 | 0.524892392  | 0.722469314 | 0.806361168 | RIPK3       |
| ENSG00000188191 | 683.2730254 | 600.3803778 | 0.186273375  | 0.722712488 | 0.806597927 | PRKAR1B     |
| ENSG00000201036 | 0.907445357 | 1.467450118 | -0.683632571 | 0.722854163 | 1           | RF00181     |
| ENSG00000270482 | 2.125753916 | 2.985650913 | -0.475161793 | 0.72302163  | 0.806890138 | AC026367.1  |
| ENSG00000266412 | 3114.251786 | 2957.913293 | 0.074280117  | 0.723036423 | 0.806890138 | NCOA4       |
| ENSG00000229487 | 6.888168163 | 5.502648973 | 0.336426146  | 0.723326098 | 0.807178737 | ALG13-AS1   |
| ENSG00000169946 | 64.54961105 | 51.8380929  | 0.316005521  | 0.723739135 | 0.807582179 | ZFFPM2      |
| novel.1009      | 5.995837861 | 4.228744955 | 0.520843411  | 0.723749796 | 0.807582179 | -           |
| ENSG00000253667 | 10.83006644 | 8.579188756 | 0.346967172  | 0.723893181 | 0.807705793 | AC100821.1  |
| ENSG00000131791 | 622.4255131 | 586.2732611 | 0.086568745  | 0.723922755 | 0.807705793 | PRKAB2      |
| ENSG00000276289 | 2.113146158 | 1.161661783 | 0.885074634  | 0.724026334 | 0.80778667  | KCNE1B      |
| ENSG00000267340 | 3.016830569 | 2.180528143 | 0.475769131  | 0.724132101 | 0.807869981 | AC060780.2  |
| ENSG00000233421 | 2.464339932 | 3.82158366  | -0.642608181 | 0.724198659 | 0.807909544 | LINC01783   |
| ENSG00000275441 | 1.846374476 | 1.110911105 | 0.742390442  | 0.724269939 | 0.807922412 | AC020765.2  |
| ENSG00000183098 | 458.1451768 | 393.8467633 | 0.217698504  | 0.724272388 | 0.807922412 | GPC6        |
| ENSG00000273136 | 196.708875  | 181.5225038 | 0.116345986  | 0.724310407 | 0.807930134 | NBPF26      |
| ENSG00000203286 | 2.695866906 | 3.678659843 | -0.433969329 | 0.72449294  | 0.808035144 | RF00017     |
| ENSG00000140853 | 619.7478526 | 663.6236655 | -0.098231279 | 0.724499731 | 0.808035144 | NLRC5       |
| ENSG00000267543 | 16.12351675 | 13.35113075 | 0.276340598  | 0.72450234  | 0.808035144 | AC015802.3  |
| ENSG00000173083 | 96.06553815 | 83.98677729 | 0.193483763  | 0.724558139 | 0.808035144 | HPSE        |
| novel.624       | 20.28587263 | 23.21599189 | -0.191124547 | 0.724560054 | 0.808035144 | -           |
| ENSG00000235349 | 0.601596751 | 1.10029862  | -0.860760138 | 0.724598832 | 1           | AC016769.3  |



|                 |             |             |              |             |             |             |
|-----------------|-------------|-------------|--------------|-------------|-------------|-------------|
| ENSG00000239152 | 0.601596751 | 1.10029862  | -0.860760138 | 0.724598832 | 1           | RNA5SP310   |
| ENSG00000165935 | 2.128261214 | 1.161661783 | 0.893847835  | 0.724669488 | 0.808122498 | SMCO2       |
| ENSG00000160471 | 5.411863464 | 3.861721852 | 0.481304424  | 0.724727108 | 0.808142026 | COX6B2      |
| ENSG00000140830 | 271.3924057 | 251.3883798 | 0.110241495  | 0.724749209 | 0.808142026 | TXNL4B      |
| ENSG00000254165 | 9.658356701 | 11.68782279 | -0.278473888 | 0.724882133 | 0.808255556 | AC090739.1  |
| ENSG00000223309 | 4.807759415 | 3.689272328 | 0.396791718  | 0.724913429 | 0.808255763 | RNU6-722P   |
| ENSG00000176974 | 50.47965074 | 39.02926043 | 0.374415555  | 0.724980345 | 0.808295685 | SHMT1       |
| ENSG00000276570 | 13.99303298 | 11.76912665 | 0.256646155  | 0.72517025  | 0.80847272  | AC010327.6  |
| ENSG00000241007 | 5.127469429 | 3.892403433 | 0.39226524   | 0.725278818 | 0.808559064 | SEPT7P6     |
| ENSG00000204653 | 9.040391245 | 10.74093207 | -0.247867131 | 0.725391332 | 0.808649798 | ASPDH       |
| ENSG00000240373 | 3.665026137 | 2.618499415 | 0.498765593  | 0.725514817 | 0.808752754 | SEC62-AS1   |
| ENSG00000060718 | 1589.867686 | 2019.318101 | -0.345019132 | 0.725787005 | 0.80902146  | COL11A1     |
| ENSG00000161011 | 755.1099989 | 647.1371682 | 0.222916171  | 0.725858952 | 0.809066945 | SQSTM1      |
| ENSG00000280269 | 1.522903516 | 2.211209725 | -0.529207068 | 0.725901147 | 0.809079266 | AP000577.1  |
| novel.1007      | 1738.614877 | 2500.572384 | -0.524310187 | 0.725996813 | 0.809135222 | -           |
| ENSG00000187952 | 3.370531641 | 4.515748464 | -0.436212447 | 0.726027056 | 0.809135222 | HS6ST1P1    |
| ENSG00000237153 | 0.894837599 | 1.436768536 | -0.675333937 | 0.726034379 | 1           | AL162725.2  |
| ENSG00000254691 | 3.240764379 | 2.129777466 | 0.607204977  | 0.72604478  | 0.809135222 | AP002812.3  |
| ENSG00000254806 | 1.759445085 | 0.774441189 | 1.203965562  | 0.726085469 | 1           | SYS1-DBNDD2 |
| ENSG00000125356 | 1061.41698  | 1002.655838 | 0.082192759  | 0.72616607  | 0.809235681 | NDUFA1      |
| ENSG00000143450 | 20.63957371 | 16.02538953 | 0.358247813  | 0.726291986 | 0.809325538 | OAZ3        |
| ENSG00000242338 | 16.2444372  | 18.81261405 | -0.213355316 | 0.726326184 | 0.809325538 | BMS1P4      |
| ENSG00000165572 | 310.7624805 | 334.7043063 | -0.107474368 | 0.726340155 | 0.809325538 | KBTBD6      |
| ENSG00000182307 | 975.721278  | 1032.881742 | -0.082409466 | 0.726428455 | 0.809389214 | C8orf33     |
| ENSG00000164687 | 907.973738  | 834.4003485 | 0.121777108  | 0.726510055 | 0.809432364 | FABP5       |
| ENSG00000101162 | 13.77758997 | 11.09991123 | 0.305111942  | 0.726529492 | 0.809432364 | TUBB1       |
| ENSG00000164556 | 1.773306493 | 1.029478846 | 0.771808859  | 0.726627367 | 0.809471985 | FAM183BP    |
| ENSG00000270095 | 1.773306493 | 1.029478846 | 0.771808859  | 0.726627367 | 0.809471985 | AC068790.6  |
| ENSG00000154978 | 1550.480061 | 1680.115669 | -0.116003037 | 0.72690668  | 0.809748423 | VOPP1       |
| ENSG00000274204 | 0.308355904 | 0.723690511 | -1.150103918 | 0.726968062 | 1           | AL138689.1  |
| ENSG00000232969 | 0.308355904 | 0.723690511 | -1.150103918 | 0.726968062 | 1           | AP001062.2  |
| ENSG00000241464 | 0.308355904 | 0.723690511 | -1.150103918 | 0.726968062 | 1           | RPL39P38    |
| ENSG00000233242 | 0.308355904 | 0.723690511 | -1.150103918 | 0.726968062 | 1           | AL512604.2  |
| ENSG00000226666 | 0.308355904 | 0.723690511 | -1.150103918 | 0.726968062 | 1           | HSPA9P1     |
| ENSG00000277235 | 0.308355904 | 0.723690511 | -1.150103918 | 0.726968062 | 1           | AL035420.3  |
| ENSG00000244693 | 0.308355904 | 0.723690511 | -1.150103918 | 0.726968062 | 1           | CTAGE8      |
| ENSG00000213082 | 0.308355904 | 0.723690511 | -1.150103918 | 0.726968062 | 1           | PPP1R14BP2  |
| ENSG00000242083 | 0.308355904 | 0.723690511 | -1.150103918 | 0.726968062 | 1           | RPL7AP31    |
| ENSG00000205334 | 2.391271949 | 3.718798035 | -0.627770691 | 0.726976624 | 0.809791617 | LINC01460   |
| ENSG00000280987 | 0.307102255 | 0.723690511 | -1.150105684 | 0.727053537 | 1           | MATR3       |
| ENSG00000226544 | 0.307102255 | 0.723690511 | -1.150105684 | 0.727053537 | 1           | RPL7P22     |
| ENSG00000232917 | 0.307102255 | 0.723690511 | -1.150105684 | 0.727053537 | 1           | HSPE1P6     |
| ENSG00000218153 | 0.307102255 | 0.723690511 | -1.150105684 | 0.727053537 | 1           | KRT18P22    |
| ENSG00000235587 | 0.307102255 | 0.723690511 | -1.150105684 | 0.727053537 | 1           | GAPDHP65    |
| ENSG00000072315 | 0.307102255 | 0.723690511 | -1.150105684 | 0.727053537 | 1           | TRPC5       |
| ENSG00000250038 | 0.307102255 | 0.723690511 | -1.150105684 | 0.727053537 | 1           | AC093791.1  |
| ENSG00000101542 | 7.543956895 | 5.901766323 | 0.342947638  | 0.727054582 | 0.809843734 | CDH20       |
| ENSG00000180834 | 11.90008774 | 14.65456048 | -0.302764022 | 0.727156889 | 0.809885826 | MAP6D1      |
| ENSG00000260671 | 3.346569772 | 4.646775526 | -0.476111308 | 0.727158898 | 0.809885826 | AC010536.2  |
| ENSG00000121879 | 485.0038123 | 454.1793894 | 0.094228384  | 0.727185888 | 0.809885826 | PIK3CA      |
| ENSG00000132155 | 1896.005309 | 1988.650531 | -0.068747609 | 0.727278872 | 0.809929676 | RAF1        |

|                 |             |             |              |             |             |            |
|-----------------|-------------|-------------|--------------|-------------|-------------|------------|
| ENSG00000128908 | 774.2465574 | 731.8892658 | 0.081157192  | 0.727287608 | 0.809929676 | INO80      |
| ENSG00000219470 | 2.727350667 | 3.61729668  | -0.4045435   | 0.727454284 | 0.810080569 | AL355802.1 |
| ENSG00000101958 | 2.094270155 | 1.161661783 | 0.873448393  | 0.727552984 | 0.810145822 | GLRA2      |
| ENSG00000128311 | 520.5765898 | 559.4269803 | -0.103721032 | 0.727585711 | 0.810145822 | TST        |
| ENSG00000258940 | 9.132335231 | 7.438880339 | 0.28866554   | 0.727606429 | 0.810145822 | AL132639.2 |
| ENSG00000229491 | 1.481319294 | 0.774441189 | 0.965384941  | 0.727628237 | 1           | AC136489.1 |
| ENSG00000120329 | 1.481319294 | 0.774441189 | 0.965384941  | 0.727628237 | 1           | SLC25A2    |
| ENSG00000133961 | 2266.674315 | 2421.01993  | -0.094901014 | 0.72764942  | 0.810158971 | NUMB       |
| ENSG00000105668 | 4.20992361  | 6.072803182 | -0.518222724 | 0.727728838 | 0.810212673 | UPK1A      |
| ENSG00000222990 | 1.480065645 | 0.774441189 | 0.964317023  | 0.72792941  | 1           | RNU4-22P   |
| ENSG00000287221 | 0.293240848 | 0.723690511 | -1.150125291 | 0.72800507  | 1           | AL589794.2 |
| ENSG00000254856 | 0.293240848 | 0.723690511 | -1.150125291 | 0.72800507  | 1           | NDUFA3P2   |
| ENSG00000275636 | 0.293240848 | 0.723690511 | -1.150125291 | 0.72800507  | 1           | AC021755.3 |
| ENSG00000235254 | 0.293240848 | 0.723690511 | -1.150125291 | 0.72800507  | 1           | TMEM185AP1 |
| ENSG00000233514 | 0.293240848 | 0.723690511 | -1.150125291 | 0.72800507  | 1           | AL356653.1 |
| ENSG00000244383 | 0.293240848 | 0.723690511 | -1.150125291 | 0.72800507  | 1           | FAM3D-AS1  |
| ENSG00000204904 | 1.229662669 | 2.038888596 | -0.747268272 | 0.728005739 | 0.810486229 | LINC01545  |
| novel.407       | 456.8499263 | 507.7698947 | -0.152547066 | 0.728200897 | 0.81066876  | -          |
| ENSG00000089163 | 21.71969547 | 17.72981599 | 0.29633313   | 0.728532957 | 0.811003674 | SIRT4      |
| ENSG00000260583 | 6.347031636 | 4.780114338 | 0.417075931  | 0.728616415 | 0.811057271 | AP000223.1 |
| ENSG00000135637 | 164.2310696 | 175.2526057 | -0.093890106 | 0.728643538 | 0.811057271 | CCDC142    |
| ENSG00000275180 | 70.48742541 | 78.97331699 | -0.162094606 | 0.728755072 | 0.811119442 | AC048341.2 |
| novel.865       | 38.90786292 | 44.47221569 | -0.189683944 | 0.728761831 | 0.811119442 | -          |
| ENSG00000169592 | 1111.176596 | 1037.6805   | 0.098761443  | 0.728799994 | 0.811125573 | INO80E     |
| ENSG00000266589 | 1.232169966 | 2.038888596 | -0.744959282 | 0.728829779 | 0.811125573 | MIR4512    |
| ENSG00000260735 | 4.551088195 | 3.210006989 | 0.501166231  | 0.729151093 | 0.81140531  | AC139256.1 |
| ENSG00000224957 | 4.764921544 | 6.164976321 | -0.362744553 | 0.729165201 | 0.81140531  | LINC01266  |
| ENSG00000269086 | 2.459325337 | 1.518200796 | 0.711044685  | 0.729175439 | 0.81140531  | AC008555.2 |
| ENSG00000147419 | 720.6276726 | 762.4524444 | -0.081721452 | 0.729206057 | 0.81140531  | CCDC25     |
| ENSG00000181061 | 1090.550153 | 1181.856645 | -0.116275144 | 0.729329103 | 0.81150747  | HIGD1A     |
| ENSG00000141580 | 2094.306736 | 2225.010705 | -0.087185148 | 0.729384321 | 0.811514654 | WDR45B     |
| ENSG00000169218 | 1.233423615 | 2.261960402 | -0.871422846 | 0.72939803  | 0.811514654 | RSPO1      |
| ENSG00000124496 | 351.3437832 | 389.9314058 | -0.150548    | 0.729532321 | 0.81160563  | TRETF1     |
| ENSG00000119720 | 336.1257628 | 318.3446774 | 0.078520188  | 0.729588171 | 0.81160563  | NRDE2      |
| ENSG00000267711 | 9.874768619 | 7.584115906 | 0.373057362  | 0.729601487 | 0.81160563  | AC060766.6 |
| ENSG00000287710 | 20.61826168 | 17.20468026 | 0.255972667  | 0.729617446 | 0.81160563  | AC067852.5 |
| ENSG00000239969 | 5.118622616 | 3.790773684 | 0.452126369  | 0.729635991 | 0.81160563  | AC091390.4 |
| ENSG00000226088 | 2.741212075 | 1.90542139  | 0.548589325  | 0.729722713 | 0.811667344 | AL158839.1 |
| ENSG00000227695 | 1.81990531  | 1.10029862  | 0.733882629  | 0.729887376 | 0.811815742 | DNMBP-AS1  |
| ENSG00000002330 | 601.8309557 | 637.8115681 | -0.083504198 | 0.730005972 | 0.811912892 | BAD        |
| ENSG00000153037 | 326.0384858 | 304.2626772 | 0.099457688  | 0.730274914 | 0.812177242 | SRP19      |
| ENSG00000181135 | 21.58484234 | 18.95412521 | 0.191916392  | 0.730335216 | 0.812209539 | ZNF707     |
| ENSG00000178719 | 2966.011319 | 3150.549242 | -0.087005308 | 0.730432969 | 0.812251889 | GRINA      |
| ENSG00000179071 | 25.92829416 | 29.65748763 | -0.199052322 | 0.730442361 | 0.812251889 | CCDC89     |
| ENSG00000274565 | 70.7594248  | 83.00077587 | -0.231282126 | 0.730467087 | 0.812251889 | AC080038.2 |
| ENSG00000248213 | 11.24268936 | 8.326719638 | 0.429906449  | 0.730572315 | 0.812334131 | CICP16     |
| ENSG00000248869 | 1.230916317 | 0.693008929 | 0.805437276  | 0.730619649 | 1           | LINC02511  |
| ENSG00000185168 | 3.997343909 | 5.502648973 | -0.460027843 | 0.730626886 | 0.812360043 | LINC00482  |
| ENSG00000285857 | 5.686228309 | 4.269011542 | 0.412733491  | 0.730847039 | 0.812570049 | AC016727.3 |
| ENSG00000165702 | 0.89358395  | 1.41669944  | -0.662039231 | 0.731200957 | 1           | GFI1B      |
| ENSG00000249279 | 0.89358395  | 1.41669944  | -0.662039231 | 0.731200957 | 1           | LINC02057  |

|                 |             |             |              |             |             |            |
|-----------------|-------------|-------------|--------------|-------------|-------------|------------|
| ENSG00000072062 | 1622.461846 | 1701.346919 | -0.068395733 | 0.731259469 | 0.812993806 | PRKACA     |
| ENSG00000265871 | 1.801029308 | 1.10029862  | 0.721572772  | 0.731517643 | 0.813207427 | MIR3174    |
| ENSG00000135932 | 1539.925987 | 1648.034916 | -0.097731796 | 0.731539165 | 0.813207427 | CAB39      |
| ENSG00000168002 | 968.6842375 | 906.970989  | 0.094595918  | 0.731545513 | 0.813207427 | POLR2G     |
| ENSG00000010322 | 2323.704941 | 2455.246289 | -0.079303081 | 0.731599229 | 0.813232343 | NISCH      |
| ENSG00000280198 | 3.313832363 | 4.411806964 | -0.402451913 | 0.73193506  | 0.813570839 | AC087163.3 |
| ENSG00000145996 | 214.8919863 | 227.3077002 | -0.081400703 | 0.731999888 | 0.813608089 | CDKAL1     |
| ENSG00000276744 | 5.220667063 | 3.812127049 | 0.438902526  | 0.73208854  | 0.813671816 | AC105137.2 |
| ENSG00000260288 | 1.509042109 | 2.129777466 | -0.501047313 | 0.732224093 | 0.813766946 | AC019294.2 |
| ENSG00000181085 | 1.832513069 | 2.578361223 | -0.485367271 | 0.732236775 | 0.813766946 | MAPK15     |
| ENSG00000232553 | 3.341555177 | 2.547679642 | 0.398147505  | 0.732280853 | 0.813781122 | CLK2P1     |
| ENSG00000231245 | 6.100389606 | 7.815360054 | -0.349838931 | 0.73232468  | 0.813795017 | C1DP1      |
| ENSG00000226284 | 16.71529778 | 19.16902467 | -0.196173956 | 0.732438306 | 0.813874878 | ARPC3P1    |
| ENSG00000106511 | 283.7509281 | 439.7137896 | -0.632046769 | 0.732459197 | 0.813874878 | MEOX2      |
| ENSG00000256508 | 6.162103479 | 8.428220993 | -0.457849049 | 0.732632485 | 0.814032613 | MRGPRF-AS1 |
| ENSG00000273243 | 5.67362055  | 7.203911778 | -0.339245178 | 0.732734036 | 0.81411063  | Z82243.1   |
| ENSG00000230140 | 0.61420451  | 1.426156051 | -1.219619306 | 0.732768454 | 1           | AC016738.2 |
| ENSG00000234956 | 0.61420451  | 1.426156051 | -1.219619306 | 0.732768454 | 1           | LINC02539  |
| ENSG00000260563 | 120.2811282 | 133.7175551 | -0.150738394 | 0.732968257 | 0.814433604 | AC132872.1 |
| ENSG00000236242 | 3.638556971 | 2.558292127 | 0.514680448  | 0.733071925 | 0.814416389 | MYO16-AS1  |
| ENSG00000249626 | 7.199031364 | 9.2759221   | -0.372468482 | 0.733115648 | 0.814430139 | AC024560.2 |
| ENSG00000165730 | 2.138361675 | 3.188782018 | -0.58262455  | 0.733181619 | 0.814468601 | STOX1      |
| ENSG00000188763 | 36.65548943 | 27.43309688 | 0.417842144  | 0.7332793   | 0.814542285 | FZD9       |
| ENSG00000260744 | 1.773306493 | 1.049547942 | 0.751498999  | 0.733567305 | 0.814795509 | AC007494.2 |
| ENSG00000259330 | 1132.062923 | 1232.561188 | -0.122954439 | 0.733569984 | 0.814795509 | INAFM2     |
| ENSG00000274356 | 4.763667895 | 6.185045417 | -0.367327793 | 0.733604663 | 0.814799194 | AL355987.5 |
| ENSG00000124074 | 428.6341881 | 403.2272098 | 0.088839233  | 0.733713048 | 0.814816224 | ENKD1      |
| ENSG00000260944 | 4.621577609 | 6.370419176 | -0.468965245 | 0.733774743 | 0.814816224 | FOXC2-AS1  |
| novel.1015      | 38.22506338 | 45.83572431 | -0.261015656 | 0.733777221 | 0.814816224 | -          |
| ENSG00000185065 | 1.200686205 | 1.823989131 | -0.592587303 | 0.733783518 | 0.814816224 | AC000068.1 |
| ENSG00000227692 | 0.616711807 | 1.426156051 | -1.214654035 | 0.733783664 | 1           | MED28P3    |
| ENSG00000255156 | 0.616711807 | 1.426156051 | -1.214654035 | 0.733783664 | 1           | RNY1P9     |
| ENSG00000111341 | 3217.208491 | 2093.452647 | 0.619885917  | 0.733796742 | 0.814816224 | MGP        |
| ENSG00000229456 | 7.260816508 | 5.167463326 | 0.482272392  | 0.733831216 | 0.814816224 | RLIMP1     |
| ENSG00000278861 | 7.429304689 | 9.591038651 | -0.366499905 | 0.73385552  | 0.814816224 | AC117503.2 |
| ENSG00000215156 | 8.658967358 | 6.297287652 | 0.45602329   | 0.733870892 | 0.814816224 | AC138409.1 |
| ENSG00000156006 | 7.361536035 | 5.574753017 | 0.389958479  | 0.734056251 | 0.814987199 | NAT2       |
| ENSG00000079974 | 403.6263031 | 425.0894062 | -0.074870056 | 0.734365176 | 0.815295344 | RABL2B     |
| ENSG00000236493 | 1.843867178 | 1.10029862  | 0.749426238  | 0.734411957 | 0.815312441 | EIF2S2P3   |
| ENSG00000273450 | 1.801029308 | 1.110911105 | 0.712509575  | 0.734785382 | 0.815692147 | AL139124.1 |
| ENSG00000235410 | 2.751312536 | 1.844058227 | 0.584800443  | 0.734912567 | 0.815798479 | AL157896.1 |
| ENSG00000104960 | 1346.094123 | 1428.348717 | -0.085340525 | 0.734966342 | 0.815823316 | PTOV1      |
| ENSG00000251775 | 3.979721556 | 2.833398881 | 0.482925563  | 0.735205059 | 0.81605343  | RF01293    |
| ENSG00000171729 | 213.5205886 | 189.7405304 | 0.171098608  | 0.73529794  | 0.816121659 | TMEM51     |
| ENSG00000213397 | 37.91989861 | 33.86616349 | 0.160843758  | 0.735533964 | 0.816348752 | HAUS7      |
| ENSG00000269487 | 1.186824798 | 1.823989131 | -0.60456108  | 0.735572065 | 0.816356164 | AC008635.1 |
| ENSG00000153093 | 1.850135422 | 1.080229524 | 0.773852456  | 0.735635291 | 0.816391461 | ACOXL      |
| ENSG00000131061 | 119.6185296 | 126.9101106 | -0.086440226 | 0.735725266 | 0.816438191 | ZNF341     |
| ENSG00000164604 | 73.3844039  | 91.71458771 | -0.322082816 | 0.735740248 | 0.816438191 | GPR85      |
| ENSG00000286971 | 1.21705491  | 1.90542139  | -0.628309727 | 0.735813132 | 0.816484197 | AC012508.3 |
| ENSG00000092295 | 2.40137241  | 1.345879667 | 0.819704307  | 0.736020602 | 0.816679533 | TGM1       |

|                 |             |             |              |             |             |            |
|-----------------|-------------|-------------|--------------|-------------|-------------|------------|
| ENSG00000213385 | 2.123246619 | 1.406086955 | 0.583445522  | 0.736082143 | 0.816708536 | AC105052.2 |
| ENSG00000233330 | 6.09662866  | 4.840321626 | 0.345936341  | 0.736109611 | 0.816708536 | AL078581.1 |
| ENSG00000246889 | 25.76070362 | 23.01067743 | 0.163216727  | 0.736222491 | 0.816758236 | AP000487.1 |
| ENSG00000255176 | 21.60565617 | 26.94321905 | -0.31631446  | 0.736252002 | 0.816758236 | AP000941.1 |
| ENSG00000255421 | 3.322679175 | 2.171071533 | 0.617032576  | 0.736256706 | 0.816758236 | AP002340.1 |
| ENSG00000265511 | 11.45562506 | 9.373827435 | 0.291328947  | 0.736280153 | 0.816758236 | AC020558.2 |
| ENSG00000135521 | 362.17512   | 391.7919159 | -0.114002735 | 0.73635856  | 0.816810339 | LTV1       |
| ENSG00000155868 | 245.4259875 | 228.5853286 | 0.101645331  | 0.736467982 | 0.816896838 | MED7       |
| ENSG00000225187 | 2.123246619 | 2.965581817 | -0.470160904 | 0.736545462 | 0.816947901 | AC073283.1 |
| ENSG00000227848 | 2.418994764 | 3.404837359 | -0.50785635  | 0.736592029 | 0.816964674 | SUCLA2-AS1 |
| ENSG00000175581 | 299.8015076 | 315.8998305 | -0.076053325 | 0.736731765 | 0.817065435 | MRPL48     |
| ENSG00000288056 | 4.218770422 | 5.359853551 | -0.345463923 | 0.736745774 | 0.817065435 | AL023806.4 |
| ENSG00000179841 | 20.2329343  | 23.47128633 | -0.219016954 | 0.737043207 | 0.817360404 | AKAP5      |
| ENSG00000213260 | 0.61420451  | 1.080229524 | -0.819954779 | 0.737259796 | 1           | YWHAZP5    |
| ENSG00000188878 | 109.8107029 | 118.9729233 | -0.116461446 | 0.737383529 | 0.817702909 | FBF1       |
| ENSG00000231806 | 0.921306765 | 1.702418679 | -0.899286092 | 0.737476138 | 1           | PCAT7      |
| ENSG00000226067 | 161.2971936 | 150.357475  | 0.101586177  | 0.737490331 | 0.81778644  | LINC00623  |
| ENSG00000164091 | 2221.282025 | 2329.200904 | -0.068553745 | 0.737611856 | 0.817886288 | WDR82      |
| ENSG00000286121 | 0.601596751 | 1.060160428 | -0.819565311 | 0.737726176 | 1           | AC093298.1 |
| ENSG00000232778 | 0.909952655 | 1.41669944  | -0.645252535 | 0.737807263 | 1           | RPL23AP50  |
| ENSG00000235899 | 1.541779519 | 0.672939833 | 1.178333119  | 0.737834399 | 1           | LINC01564  |
| ENSG00000139620 | 510.5270923 | 478.917786  | 0.091598878  | 0.73784407  | 0.818097226 | KANSL2     |
| ENSG00000129673 | 9.925128383 | 8.314822883 | 0.260281183  | 0.737865066 | 0.818097226 | AANAT      |
| ENSG00000212327 | 1.509042109 | 2.149846562 | -0.510259769 | 0.737938141 | 0.818110365 | RNU6-882P  |
| ENSG00000273382 | 20.68491887 | 18.09007942 | 0.187712128  | 0.737939895 | 0.818110365 | AL356488.3 |
| ENSG00000234785 | 1.215801261 | 1.753169357 | -0.541419801 | 0.738158364 | 0.818306232 | EEF1GP5    |
| ENSG00000232163 | 1.510295757 | 2.261960402 | -0.56486058  | 0.738193483 | 0.818306232 | RPLP1P13   |
| ENSG00000279541 | 9.039137596 | 7.408070363 | 0.299440141  | 0.738211057 | 0.818306232 | AC005261.6 |
| ENSG00000244363 | 20.13124586 | 22.93985765 | -0.190841509 | 0.738297843 | 0.818367519 | RPL7P23    |
| ENSG00000106246 | 96.31135346 | 87.77014933 | 0.134443634  | 0.738436039 | 0.818452764 | PTCD1      |
| ENSG00000230795 | 5.488692393 | 3.72123818  | 0.547284382  | 0.738437752 | 0.818452764 | HLA-K      |
| ENSG00000242020 | 0.616711807 | 1.080229524 | -0.816000642 | 0.738457128 | 1           | RN7SL68P   |
| ENSG00000185507 | 66.94497282 | 58.80575185 | 0.188982322  | 0.738738868 | 0.818735832 | IRF7       |
| ENSG00000277218 | 6.090360416 | 7.764609376 | -0.344126577 | 0.738756172 | 0.818735832 | AL139123.1 |
| ENSG00000186652 | 2.376156893 | 1.4981317   | 0.683388118  | 0.738810628 | 0.818761257 | PRG2       |
| ENSG00000241095 | 1.203193503 | 0.693008929 | 0.779329544  | 0.739143076 | 1           | CYP51A1P1  |
| ENSG00000145781 | 258.9162055 | 280.9722224 | -0.118435889 | 0.739183177 | 0.819083795 | COMMD10    |
| ENSG00000233483 | 2.739958426 | 3.546476906 | -0.380747474 | 0.739186737 | 0.819083795 | AC008105.2 |
| ENSG00000258674 | 12.57565012 | 15.11619687 | -0.267509694 | 0.739196249 | 0.819083795 | AC011448.1 |
| ENSG00000272023 | 0.586481695 | 1.345879667 | -1.199466768 | 0.739197058 | 1           | AC010240.3 |
| ENSG00000230196 | 0.586481695 | 1.345879667 | -1.199466768 | 0.739197058 | 1           | DDX43P3    |
| ENSG00000213779 | 0.586481695 | 1.345879667 | -1.199466768 | 0.739197058 | 1           | AC107956.2 |
| ENSG00000143512 | 4.569964197 | 3.577158488 | 0.349329323  | 0.739261976 | 0.819121691 | HHIPL2     |
| ENSG00000165555 | 12.66383316 | 10.87427089 | 0.225456531  | 0.739315714 | 0.8191463   | NOXRED1    |
| novel.921       | 3.384393048 | 2.169915658 | 0.640348847  | 0.739427211 | 0.819234899 | -          |
| ENSG00000249328 | 2.402626059 | 3.230076085 | -0.423614377 | 0.739460206 | 0.819236519 | AC036214.1 |
| ENSG00000250299 | 12.31514668 | 14.32870305 | -0.216407324 | 0.739560868 | 0.819313104 | MRPS31P4   |
| ENSG00000203907 | 0.308355904 | 0.693008929 | -1.100933406 | 0.739577628 | 1           | OOEP       |
| ENSG00000280176 | 0.308355904 | 0.693008929 | -1.100933406 | 0.739577628 | 1           | AC012486.1 |
| ENSG00000152939 | 0.308355904 | 0.693008929 | -1.100933406 | 0.739577628 | 1           | MARVELD2   |
| ENSG00000196933 | 0.308355904 | 0.693008929 | -1.100933406 | 0.739577628 | 1           | RPS26P11   |

|                 |             |             |              |             |             |            |
|-----------------|-------------|-------------|--------------|-------------|-------------|------------|
| ENSG00000232290 | 0.308355904 | 0.693008929 | -1.100933406 | 0.739577628 | 1           | AL133260.2 |
| ENSG00000276763 | 0.308355904 | 0.693008929 | -1.100933406 | 0.739577628 | 1           | AC069499.2 |
| ENSG00000241180 | 0.308355904 | 0.693008929 | -1.100933406 | 0.739577628 | 1           | AL645608.4 |
| ENSG00000252975 | 0.308355904 | 0.693008929 | -1.100933406 | 0.739577628 | 1           | RF00019    |
| ENSG00000251821 | 0.308355904 | 0.693008929 | -1.100933406 | 0.739577628 | 1           | RNU6-583P  |
| ENSG00000278374 | 0.308355904 | 0.693008929 | -1.100933406 | 0.739577628 | 1           | RF00015    |
| ENSG00000148377 | 0.308355904 | 0.693008929 | -1.100933406 | 0.739577628 | 1           | IDI2       |
| ENSG00000230778 | 0.308355904 | 0.693008929 | -1.100933406 | 0.739577628 | 1           | ANKRD63    |
| ENSG00000267024 | 0.907445357 | 1.682349583 | -0.902069267 | 0.7396578   | 1           | AC008747.1 |
| ENSG00000088726 | 0.307102255 | 0.693008929 | -1.100926092 | 0.739664589 | 1           | TMEM40     |
| ENSG00000259521 | 0.307102255 | 0.693008929 | -1.100926092 | 0.739664589 | 1           | INO80-AS1  |
| ENSG00000212391 | 0.307102255 | 0.693008929 | -1.100926092 | 0.739664589 | 1           | RF00554    |
| ENSG00000272542 | 0.307102255 | 0.693008929 | -1.100926092 | 0.739664589 | 1           | AL137246.1 |
| ENSG00000271639 | 0.307102255 | 0.693008929 | -1.100926092 | 0.739664589 | 1           | AC019072.1 |
| ENSG00000199594 | 0.307102255 | 0.693008929 | -1.100926092 | 0.739664589 | 1           | RNU6-1301P |
| ENSG00000286804 | 0.307102255 | 0.693008929 | -1.100926092 | 0.739664589 | 1           | AC025871.3 |
| ENSG00000276077 | 0.307102255 | 0.693008929 | -1.100926092 | 0.739664589 | 1           | CU633904.1 |
| ENSG00000229605 | 2.755073482 | 3.709341424 | -0.421111597 | 0.739719591 | 0.819454002 | RPL21P93   |
| ENSG00000285190 | 1.218308559 | 0.693008929 | 0.794389339  | 0.739870165 | 1           | AC018754.1 |
| ENSG00000258249 | 1.218308559 | 0.693008929 | 0.794389339  | 0.739870165 | 1           | AC125603.3 |
| ENSG00000260103 | 1.200686205 | 0.693008929 | 0.776980468  | 0.739912295 | 1           | AC012435.1 |
| ENSG00000089101 | 1.200686205 | 0.693008929 | 0.776980468  | 0.739912295 | 1           | CFAP61     |
| ENSG00000253457 | 1.200686205 | 0.693008929 | 0.776980468  | 0.739912295 | 1           | SMIM18     |
| ENSG00000183911 | 1.200686205 | 0.693008929 | 0.776980468  | 0.739912295 | 1           | RPL21P132  |
| ENSG00000202191 | 1.200686205 | 0.693008929 | 0.776980468  | 0.739912295 | 1           | SNORD113-1 |
| ENSG00000173575 | 1915.402355 | 2005.837299 | -0.066445516 | 0.739972821 | 0.819680319 | CHD2       |
| ENSG00000198899 | 51826.66569 | 55190.81418 | -0.090735818 | 0.739986986 | 0.819680319 | MT-ATP6    |
| ENSG00000272824 | 2.697120555 | 3.586615098 | -0.407395742 | 0.740068888 | 0.819735835 | AC245100.7 |
| ENSG00000206762 | 1.17296339  | 2.099095884 | -0.836640094 | 0.740100207 | 0.819735835 | RNU6-418P  |
| ENSG00000287580 | 3.929290521 | 4.932494765 | -0.335505221 | 0.740182729 | 0.819792288 | AC073349.4 |
| ENSG00000272223 | 8.064892499 | 6.53212782  | 0.311664396  | 0.740260875 | 0.819843889 | AL136304.1 |
| ENSG00000259783 | 0.600343103 | 1.049547942 | -0.811656866 | 0.740318983 | 1           | LINC02259  |
| ENSG00000188493 | 193.0599603 | 204.6902323 | -0.085221141 | 0.740349638 | 0.81986515  | C19orf54   |
| ENSG00000110844 | 154.2658241 | 163.3119286 | -0.082006496 | 0.74038033  | 0.81986515  | PRPF40B    |
| ENSG00000269901 | 2.976499995 | 4.085949533 | -0.440924284 | 0.740387871 | 0.81986515  | AC010531.5 |
| novel.341       | 8.772365915 | 6.920504289 | 0.346657929  | 0.740406298 | 0.81986515  | -          |
| ENSG00000167799 | 51.9029024  | 56.13308131 | -0.114974185 | 0.740463899 | 0.819893989 | NUDT8      |
| novel.909       | 1347.421461 | 1547.215211 | -0.199620575 | 0.740575573 | 0.819982696 | -          |
| ENSG00000233024 | 168.927653  | 183.1546638 | -0.115519273 | 0.740616499 | 0.819993065 | NPIPA9     |
| novel.1112      | 0.293240848 | 0.693008929 | -1.100844854 | 0.740632686 | 1           | -          |
| ENSG00000264672 | 0.293240848 | 0.693008929 | -1.100844854 | 0.740632686 | 1           | SEPT4-AS1  |
| ENSG00000252581 | 0.293240848 | 0.693008929 | -1.100844854 | 0.740632686 | 1           | RNU6-1098P |
| ENSG00000240392 | 0.293240848 | 0.693008929 | -1.100844854 | 0.740632686 | 1           | RPL9P3     |
| ENSG00000132207 | 0.293240848 | 0.693008929 | -1.100844854 | 0.740632686 | 1           | SLX1A      |
| ENSG00000206120 | 0.293240848 | 0.693008929 | -1.100844854 | 0.740632686 | 1           | EGFEM1P    |
| ENSG00000266721 | 0.293240848 | 0.693008929 | -1.100844854 | 0.740632686 | 1           | MIR5695    |
| ENSG00000229263 | 0.293240848 | 0.693008929 | -1.100844854 | 0.740632686 | 1           | AC004691.1 |
| ENSG00000285921 | 0.293240848 | 0.693008929 | -1.100844854 | 0.740632686 | 1           | AP000779.1 |
| ENSG00000287007 | 0.293240848 | 0.693008929 | -1.100844854 | 0.740632686 | 1           | AC087683.3 |
| ENSG00000270772 | 0.293240848 | 0.693008929 | -1.100844854 | 0.740632686 | 1           | PDHA1P1    |
| ENSG00000236761 | 0.293240848 | 0.693008929 | -1.100844854 | 0.740632686 | 1           | CTAGE9     |

|                 |             |             |              |             |             |            |
|-----------------|-------------|-------------|--------------|-------------|-------------|------------|
| ENSG00000238880 | 0.293240848 | 0.693008929 | -1.100844854 | 0.740632686 | 1           | RNU7-59P   |
| ENSG00000284711 | 0.293240848 | 0.693008929 | -1.100844854 | 0.740632686 | 1           | AC010325.3 |
| ENSG00000113946 | 5.497539206 | 4.209960129 | 0.374203134  | 0.740931612 | 0.820306993 | CLDN16     |
| ENSG00000238366 | 2.113146158 | 1.41669944  | 0.571561093  | 0.741226625 | 0.820598642 | RF00019    |
| ENSG00000280020 | 3.268487194 | 4.340987191 | -0.399809565 | 0.74128482  | 0.820628102 | AC116407.3 |
| novel.485       | 18.2723349  | 22.33748081 | -0.28577034  | 0.741381464 | 0.82070012  | -          |
| ENSG00000241472 | 23.50776101 | 20.2931168  | 0.206268019  | 0.741422554 | 0.820710638 | PTPRG-AS1  |
| ENSG00000233578 | 2.374903244 | 3.240688571 | -0.438899337 | 0.741521142 | 0.820784798 | EIF4EP1    |
| novel.1046      | 3.590704505 | 4.749432756 | -0.393319626 | 0.741712224 | 0.820902251 | -          |
| ENSG00000173567 | 17.61013538 | 15.19531737 | 0.206478075  | 0.741718004 | 0.820902251 | ADGRF3     |
| ENSG00000229021 | 2.751312536 | 1.682349583 | 0.690086861  | 0.74174576  | 0.820902251 | AL450992.1 |
| ENSG00000099381 | 651.4129211 | 693.9031323 | -0.090894309 | 0.741753637 | 0.820902251 | SETD1A     |
| ENSG00000078177 | 171.9974494 | 159.6808086 | 0.106188118  | 0.741842354 | 0.820965464 | N4BP2      |
| ENSG00000225442 | 0.89358395  | 1.518200796 | -0.742093065 | 0.742005619 | 1           | MPRIP-AS1  |
| ENSG00000070047 | 50.13020881 | 59.21877373 | -0.238125384 | 0.742065556 | 0.821177494 | PHRF1      |
| ENSG00000227523 | 2.052685933 | 1.130980201 | 0.876667884  | 0.742248496 | 0.821344954 | RPS20P15   |
| ENSG00000155850 | 567.990387  | 540.4073688 | 0.07160573   | 0.74230388  | 0.821371256 | SLC26A2    |
| ENSG00000255000 | 2.124500267 | 1.487519214 | 0.531496833  | 0.742341593 | 0.821378005 | AC139103.1 |
| ENSG00000286153 | 18.45049626 | 23.3351222  | -0.33438624  | 0.742406035 | 0.821414326 | AP000331.1 |
| ENSG00000267922 | 2.128261214 | 1.41669944  | 0.579937022  | 0.742454271 | 0.821432714 | AC007785.1 |
| ENSG00000262979 | 0.894837599 | 1.518200796 | -0.740634578 | 0.742497111 | 1           | AC124319.2 |
| ENSG00000147789 | 416.4450481 | 441.522505  | -0.084003894 | 0.742591191 | 0.821549214 | ZNF7       |
| ENSG00000243797 | 2.361041837 | 3.688116453 | -0.634145585 | 0.742741546 | 0.821651697 | AC004917.1 |
| ENSG00000167130 | 355.5792234 | 380.303581  | -0.097744618 | 0.742747075 | 0.821651697 | DOLPP1     |
| ENSG00000205302 | 987.3844525 | 939.1371614 | 0.07211426   | 0.742787229 | 0.821661131 | SNX2       |
| ENSG00000108312 | 2371.924792 | 2231.808268 | 0.087689581  | 0.742864446 | 0.821685311 | UBTF       |
| ENSG00000196683 | 2475.070372 | 2681.076125 | -0.115283367 | 0.74287234  | 0.821685311 | TOMM7      |
| ENSG00000263080 | 0.922560414 | 1.41669944  | -0.632272677 | 0.742933019 | 1           | AC009121.2 |
| ENSG00000237899 | 5.758042644 | 4.566499142 | 0.324523775  | 0.743006168 | 0.821798351 | AL031289.1 |
| novel.78        | 1.230916317 | 0.723690511 | 0.766120056  | 0.743006452 | 1           | -          |
| ENSG00000105610 | 1.230916317 | 0.723690511 | 0.766120056  | 0.743006452 | 1           | KLF1       |
| ENSG00000198042 | 382.9688501 | 412.7097432 | -0.108601396 | 0.74315523  | 0.821922764 | MAK16      |
| ENSG00000279759 | 82.31434607 | 93.03649829 | -0.174763983 | 0.743181924 | 0.821922764 | AC118344.2 |
| ENSG00000225974 | 1.21705491  | 0.713078025 | 0.765382942  | 0.743403159 | 1           | AC005550.1 |
| ENSG00000215893 | 1.21705491  | 0.713078025 | 0.765382942  | 0.743403159 | 1           | RPL23AP17  |
| ENSG00000101452 | 275.439283  | 257.3857869 | 0.097301537  | 0.743475129 | 0.822212034 | DHX35      |
| ENSG00000156687 | 19.37731582 | 14.77857107 | 0.387765927  | 0.743626121 | 0.822344013 | UNC5D      |
| ENSG00000154328 | 32.71337769 | 37.66279776 | -0.20334939  | 0.743773465 | 0.822471947 | NEIL2      |
| ENSG00000278829 | 1.215801261 | 0.713078025 | 0.764214164  | 0.743786349 | 1           | AC099811.5 |
| ENSG00000174697 | 1.230916317 | 1.854670712 | -0.586010381 | 0.743977908 | 0.822663008 | LEP        |
| ENSG00000178660 | 11.61555117 | 9.651245939 | 0.263614651  | 0.744087261 | 0.822726568 | ARMC10P1   |
| ENSG00000198960 | 298.4211925 | 275.5389461 | 0.113991995  | 0.744098722 | 0.822726568 | ARMCX6     |
| novel.1048      | 26.7174689  | 33.00579493 | -0.306889423 | 0.744170169 | 0.822770551 | -          |
| ENSG00000260859 | 0.615458159 | 1.060160428 | -0.79728874  | 0.744471647 | 1           | AC025280.1 |
| novel.1016      | 24.22024902 | 21.02125524 | 0.210876978  | 0.744481493 | 0.82307973  | -          |
| ENSG00000162971 | 237.380699  | 254.0807343 | -0.097529871 | 0.744580008 | 0.823153618 | TYW5       |
| ENSG00000163481 | 501.0744063 | 467.8202337 | 0.098570564  | 0.74475873  | 0.823306117 | RNF25      |
| ENSG00000105339 | 979.916972  | 1087.944149 | -0.150629792 | 0.744781327 | 0.823306117 | DENND3     |
| ENSG00000188739 | 19.39730328 | 17.08884201 | 0.187252529  | 0.744821611 | 0.823315617 | RBM34      |
| ENSG00000264343 | 11.20146114 | 8.445849944 | 0.410779138  | 0.744909415 | 0.823366703 | NOTCH2NLA  |
| ENSG00000183479 | 10.64764558 | 8.094062827 | 0.391686426  | 0.74493296  | 0.823366703 | TREX2      |

|                 |             |             |              |             |             |            |
|-----------------|-------------|-------------|--------------|-------------|-------------|------------|
| ENSG00000183117 | 2.771442187 | 1.762625967 | 0.644047016  | 0.7449629   | 0.823366703 | CSMD1      |
| ENSG00000224533 | 0.922560414 | 1.682349583 | -0.882441931 | 0.745112888 | 1           | TMLHE-AS1  |
| ENSG00000270068 | 0.922560414 | 1.682349583 | -0.882441931 | 0.745112888 | 1           | AC125494.3 |
| ENSG00000241984 | 1.493927053 | 2.191140629 | -0.540329195 | 0.745146533 | 0.823534629 | RPL7AP2    |
| ENSG00000279900 | 8.871547059 | 6.807234573 | 0.3851639    | 0.745208688 | 0.82356829  | AP001767.4 |
| ENSG00000175701 | 409.4951497 | 441.5629603 | -0.109148144 | 0.745291691 | 0.823622258 | MTLN       |
| ENSG00000287513 | 2.990361403 | 2.120320855 | 0.493459808  | 0.745320923 | 0.823622258 | AL133390.1 |
| ENSG00000141376 | 320.1777854 | 301.3231878 | 0.088415536  | 0.74541235  | 0.823688256 | BCAS3      |
| ENSG00000260121 | 21.15646363 | 17.35551963 | 0.291845111  | 0.745642693 | 0.823907745 | AC138028.4 |
| novel.65        | 0.908699006 | 1.386017859 | -0.625092507 | 0.745719165 | 1           | -          |
| ENSG00000133742 | 0.908699006 | 1.386017859 | -0.625092507 | 0.745719165 | 1           | CA1        |
| ENSG00000230366 | 5.981976454 | 7.418811243 | -0.311850642 | 0.745738431 | 0.823978489 | DSCR9      |
| ENSG00000123154 | 106.9367181 | 100.0775927 | 0.096847687  | 0.745801002 | 0.824004879 | WDR83      |
| ENSG00000250410 | 5.774411348 | 4.666844622 | 0.305620206  | 0.745863999 | 0.824004879 | AC112722.1 |
| ENSG00000223831 | 2.46684723  | 1.365948763 | 0.839275956  | 0.745873947 | 0.824004879 | AC005006.1 |
| ENSG00000257953 | 2.684512796 | 1.742556871 | 0.616369337  | 0.745889178 | 0.824004879 | AC083805.2 |
| ENSG00000125812 | 537.9399685 | 513.783633  | 0.066462924  | 0.745976564 | 0.824037202 | GZF1       |
| ENSG00000135114 | 265.5504951 | 296.9937466 | -0.160792817 | 0.745981871 | 0.824037202 | OASL       |
| ENSG00000273314 | 44.31005285 | 38.96036689 | 0.183732257  | 0.746156502 | 0.824195063 | AC005229.4 |
| novel.54        | 9.337393039 | 7.938214774 | 0.23858574   | 0.746199187 | 0.824207171 | -          |
| ENSG00000185988 | 6.136887962 | 3.983292303 | 0.623450327  | 0.746332305 | 0.824319161 | PLK5       |
| ENSG00000223923 | 3.389407643 | 2.200597239 | 0.625706549  | 0.746410022 | 0.824369953 | AC010136.1 |
| ENSG00000186687 | 426.5115388 | 404.2973401 | 0.076543032  | 0.746463539 | 0.824394015 | LYRM7      |
| ENSG00000287742 | 2.139615324 | 1.487519214 | 0.538438172  | 0.746663086 | 0.824544295 | AC068282.2 |
| ENSG00000203855 | 2.139615324 | 1.487519214 | 0.538438172  | 0.746663086 | 0.824544295 | HSD3BP4    |
| ENSG00000141013 | 263.4251125 | 250.0703564 | 0.075302614  | 0.746886901 | 0.8247564   | GAS8       |
| ENSG00000118762 | 1265.929137 | 1184.579959 | 0.095641726  | 0.747185512 | 0.825019153 | PKD2       |
| ENSG00000223896 | 1.789675198 | 1.130980201 | 0.685178242  | 0.747188356 | 0.825019153 | CCNJP2     |
| ENSG00000126759 | 3.617173671 | 4.637318915 | -0.35887101  | 0.747242986 | 0.82504441  | CFP        |
| ENSG00000185774 | 5.39424111  | 4.075337048 | 0.416120067  | 0.747283211 | 0.825053761 | KCNIP4     |
| ENSG00000253739 | 2.113146158 | 1.436768536 | 0.557581414  | 0.747502846 | 0.825261184 | RNU6-323P  |
| novel.298       | 0.907445357 | 1.518200796 | -0.725782447 | 0.747511832 | 1           | -          |
| ENSG00000196183 | 0.907445357 | 1.518200796 | -0.725782447 | 0.747511832 | 1           | RPS2P4     |
| ENSG00000286855 | 0.601596751 | 1.029478846 | -0.788769224 | 0.747609936 | 1           | AC074024.1 |
| ENSG00000215571 | 0.615458159 | 1.049547942 | -0.787383391 | 0.747672235 | 1           | GRK6P1     |
| ENSG00000229167 | 0.615458159 | 1.049547942 | -0.787383391 | 0.747672235 | 1           | AC114488.1 |
| ENSG00000266640 | 0.615458159 | 1.049547942 | -0.787383391 | 0.747672235 | 1           | MIR4754    |
| ENSG00000256464 | 0.615458159 | 1.049547942 | -0.787383391 | 0.747672235 | 1           | YWHABP2    |
| ENSG00000187904 | 0.894837599 | 1.4981317   | -0.724845829 | 0.74784454  | 1           | AC097382.1 |
| ENSG00000273076 | 6.886914514 | 5.14739423  | 0.410464715  | 0.74803993  | 0.825819046 | AL021707.7 |
| ENSG00000168065 | 1.232169966 | 0.723690511 | 0.767355453  | 0.748051848 | 1           | SLC22A11   |
| ENSG00000233319 | 1.232169966 | 0.723690511 | 0.767355453  | 0.748051848 | 1           | PPIAP32    |
| ENSG00000266446 | 1.201939854 | 0.713078025 | 0.751118663  | 0.748080668 | 1           | AL449423.1 |
| novel.735       | 11.42539495 | 13.82692847 | -0.270811826 | 0.748215084 | 0.825977315 | -          |
| ENSG00000187522 | 254.9632103 | 271.4112702 | -0.0913136   | 0.748269607 | 0.825992123 | HSPA14     |
| ENSG00000250251 | 198.3087218 | 217.1763238 | -0.130821347 | 0.748293964 | 0.825992123 | PKD1P6     |
| ENSG00000227014 | 26.57495134 | 23.71198709 | 0.165286498  | 0.748335633 | 0.825992123 | AC007285.1 |
| ENSG00000145439 | 439.3781794 | 460.9699413 | -0.069752742 | 0.748355667 | 0.825992123 | CBR4       |
| ENSG00000286545 | 14.01287789 | 11.69830688 | 0.2681059    | 0.748486212 | 0.826074214 | AC092645.2 |
| ENSG00000187954 | 1251.842776 | 1198.185764 | 0.063379057  | 0.748493632 | 0.826074214 | CYHR1      |
| ENSG00000214534 | 1.804790254 | 1.00940975  | 0.819406921  | 0.748595486 | 0.82615153  | ZNF705E    |

|                 |             |             |              |             |             |            |
|-----------------|-------------|-------------|--------------|-------------|-------------|------------|
| ENSG00000085063 | 10126.83439 | 10685.76315 | -0.077494222 | 0.748644786 | 0.826170845 | CD59       |
| ENSG00000147679 | 304.7986677 | 324.6532667 | -0.091997838 | 0.748683921 | 0.82617894  | UTP23      |
| ENSG00000259581 | 1.522903516 | 2.149846562 | -0.501385395 | 0.748877115 | 0.826357032 | TYRO3P     |
| ENSG00000178404 | 15.16696528 | 12.28865858 | 0.30716181   | 0.74898444  | 0.826436978 | CEP295NL   |
| ENSG00000156639 | 1636.613651 | 1717.986009 | -0.069867097 | 0.749058855 | 0.826436978 | ZFAND3     |
| ENSG00000073146 | 10.37209836 | 12.66629416 | -0.281674798 | 0.749075369 | 0.826436978 | MOV10L1    |
| ENSG00000282508 | 9.984050224 | 7.032746524 | 0.505327824  | 0.749077378 | 0.826436978 | LINC01002  |
| ENSG00000172123 | 319.5083926 | 341.7432986 | -0.097220056 | 0.749108611 | 0.826436978 | SLFN12     |
| ENSG00000102908 | 698.279899  | 647.7373335 | 0.108711296  | 0.749311817 | 0.82662606  | NFAT5      |
| ENSG00000196796 | 2.432856171 | 1.803920035 | 0.432956636  | 0.749462799 | 0.826757514 | NPIPB10P   |
| ENSG00000159860 | 1.186824798 | 0.693008929 | 0.764239266  | 0.749568231 | 1           | TCAF2P1    |
| ENSG00000283929 | 1.188078446 | 1.793307549 | -0.586274234 | 0.749585756 | 0.826858045 | MIR5010    |
| ENSG00000230870 | 1.802282956 | 2.446178286 | -0.449002778 | 0.749735027 | 0.826987592 | FBXW11P1   |
| ENSG00000112320 | 209.2962182 | 175.6376901 | 0.252550666  | 0.74986368  | 0.827094386 | SOBP       |
| ENSG00000117280 | 556.8419192 | 603.3236819 | -0.115693059 | 0.749936637 | 0.827139742 | RAB29      |
| ENSG00000171119 | 0.907445357 | 1.487519214 | -0.701753615 | 0.749995615 | 1           | NRTN       |
| novel.538       | 8.87029341  | 6.786009602 | 0.388473528  | 0.749999549 | 0.827174016 | -          |
| ENSG00000117360 | 889.0369998 | 943.6460559 | -0.085930208 | 0.750141963 | 0.827295746 | PRPF3      |
| ENSG00000151632 | 253.9456824 | 204.2197001 | 0.314140782  | 0.750173607 | 0.827295746 | AKR1C2     |
| ENSG00000223356 | 2.668144092 | 1.844058227 | 0.547903956  | 0.75044879  | 0.827564093 | AL590666.1 |
| ENSG00000132437 | 0.61420451  | 1.345879667 | -1.14320832  | 0.75064354  | 1           | DDC        |
| ENSG00000227279 | 1.773306493 | 1.10029862  | 0.701731588  | 0.750662544 | 0.827718293 | AC110015.1 |
| ENSG00000237846 | 2.755073482 | 1.782695063 | 0.62331912   | 0.750680373 | 0.827718293 | AL773545.3 |
| ENSG00000150316 | 1016.534706 | 962.1107488 | 0.07914328   | 0.75069454  | 0.827718293 | CWC15      |
| ENSG00000141642 | 108.166808  | 97.64271608 | 0.145343826  | 0.750721823 | 0.827718293 | ELAC1      |
| ENSG00000189308 | 268.4157197 | 255.2261326 | 0.072760575  | 0.750747915 | 0.827718293 | LIN54      |
| ENSG00000166710 | 9422.443273 | 7561.272302 | 0.317470166  | 0.750900703 | 0.827851616 | B2M        |
| ENSG00000169439 | 946.6914521 | 814.6621409 | 0.216489865  | 0.750933251 | 0.827852369 | SDC2       |
| ENSG00000238258 | 0.586481695 | 1.130980201 | -0.924784163 | 0.750959952 | 1           | AL121748.1 |
| ENSG00000235651 | 0.586481695 | 1.130980201 | -0.924784163 | 0.750959952 | 1           | AC064850.1 |
| ENSG00000256037 | 2.446717578 | 3.230076085 | -0.405517415 | 0.751008351 | 0.827900032 | MRPL40P1   |
| ENSG00000125247 | 337.7657549 | 357.9182907 | -0.083072467 | 0.751256761 | 0.828138738 | TMTC4      |
| ENSG00000142330 | 665.3653945 | 698.3825957 | -0.069449553 | 0.751493014 | 0.828364021 | CAPN10     |
| ENSG00000224800 | 0.925067711 | 0.387220594 | 1.257219138  | 0.751564535 | 1           | RPS27AP6   |
| ENSG00000253043 | 0.925067711 | 0.387220594 | 1.257219138  | 0.751564535 | 1           | RNU7-181P  |
| ENSG00000230913 | 0.925067711 | 0.387220594 | 1.257219138  | 0.751564535 | 1           | NPM1P51    |
| ENSG00000238210 | 0.925067711 | 0.387220594 | 1.257219138  | 0.751564535 | 1           | ETDA       |
| ENSG00000235419 | 1.230916317 | 0.743759607 | 0.739233611  | 0.751569578 | 1           | AC010149.1 |
| ENSG00000248916 | 1.230916317 | 0.743759607 | 0.739233611  | 0.751569578 | 1           | NUP210P3   |
| ENSG00000237223 | 1.230916317 | 0.743759607 | 0.739233611  | 0.751569578 | 1           | SULT1C2P1  |
| ENSG00000273212 | 1.203193503 | 0.723690511 | 0.740007006  | 0.751572708 | 1           | AC000068.2 |
| ENSG00000176857 | 1.203193503 | 0.723690511 | 0.740007006  | 0.751572708 | 1           | GJA1P1     |
| ENSG00000286577 | 1.203193503 | 0.723690511 | 0.740007006  | 0.751572708 | 1           | AC117528.1 |
| ENSG00000173988 | 3.340301529 | 2.506385574 | 0.41164974   | 0.751599961 | 0.82844676  | LRRC63     |
| ENSG00000099974 | 0.616711807 | 1.345879667 | -1.138232764 | 0.751659684 | 1           | DDTL       |
| ENSG00000271911 | 0.616711807 | 1.345879667 | -1.138232764 | 0.751659684 | 1           | AL357054.3 |
| ENSG00000277373 | 0.616711807 | 1.345879667 | -1.138232764 | 0.751659684 | 1           | AL132765.2 |
| ENSG00000181885 | 44.06814068 | 49.59825655 | -0.168607673 | 0.751746581 | 0.828543691 | CLDN7      |
| ENSG00000234832 | 2.695866906 | 1.90542139  | 0.526737812  | 0.751768496 | 0.828543691 | AL096677.1 |
| ENSG00000224992 | 7.004074017 | 5.677410247 | 0.296748468  | 0.751783571 | 0.828543691 | AL445645.1 |
| ENSG00000084070 | 944.5463142 | 1030.404446 | -0.125368202 | 0.752066404 | 0.828789472 | SMAP2      |



|                 |             |             |              |             |             |            |
|-----------------|-------------|-------------|--------------|-------------|-------------|------------|
| ENSG00000174010 | 195.3101821 | 184.5437166 | 0.081254288  | 0.752070382 | 0.828789472 | KLHL15     |
| novel.286       | 7.039389995 | 9.050410149 | -0.369989042 | 0.752422967 | 0.829135558 | -          |
| ENSG00000264350 | 3.33904788  | 4.279624027 | -0.361905303 | 0.752448258 | 0.829135558 | SNRPGP2    |
| ENSG00000271032 | 17.05019412 | 19.60584007 | -0.199847808 | 0.752563683 | 0.829207729 | AC020907.4 |
| ENSG00000205771 | 30.40129977 | 26.72258739 | 0.180264285  | 0.752577585 | 0.829207729 | CATSPER2P1 |
| ENSG00000265056 | 0.921306765 | 0.387220594 | 1.251878052  | 0.752732302 | 1           | MIR548S    |
| ENSG00000181013 | 0.921306765 | 0.387220594 | 1.251878052  | 0.752732302 | 1           | AC005666.1 |
| ENSG00000260948 | 15.11431168 | 12.60377513 | 0.269608976  | 0.752822228 | 0.829407079 | AL390195.2 |
| ENSG00000250030 | 1.525410814 | 2.292641984 | -0.572019953 | 0.75282236  | 0.829407079 | AC104806.1 |
| ENSG00000249550 | 0.925067711 | 0.356539013 | 1.257245982  | 0.752875703 | 1           | LINC01234  |
| ENSG00000224977 | 0.925067711 | 0.336469917 | 1.257245982  | 0.752875703 | 1           | AL121983.1 |
| ENSG00000282933 | 0.925067711 | 0.336469917 | 1.257245982  | 0.752875703 | 1           | RHOXF1P3   |
| ENSG00000199568 | 0.925067711 | 0.356539013 | 1.257245982  | 0.752875703 | 1           | RNU5A-1    |
| ENSG00000226145 | 0.925067711 | 0.356539013 | 1.257245982  | 0.752875703 | 1           | KRT16P6    |
| ENSG00000267429 | 0.925067711 | 0.336469917 | 1.257245982  | 0.752875703 | 1           | AC006116.6 |
| ENSG00000231256 | 0.925067711 | 0.356539013 | 1.257245982  | 0.752875703 | 1           | CFAP97D1   |
| ENSG00000254605 | 0.925067711 | 0.356539013 | 1.257245982  | 0.752875703 | 1           | AP003555.2 |
| ENSG00000227123 | 0.925067711 | 0.356539013 | 1.257245982  | 0.752875703 | 1           | RPL12P44   |
| ENSG00000255663 | 0.925067711 | 0.336469917 | 1.257245982  | 0.752875703 | 1           | AP002373.1 |
| ENSG00000255562 | 0.925067711 | 0.356539013 | 1.257245982  | 0.752875703 | 1           | UNC93B6    |
| ENSG00000263311 | 0.925067711 | 0.356539013 | 1.257245982  | 0.752875703 | 1           | AC009127.2 |
| ENSG00000258325 | 0.925067711 | 0.356539013 | 1.257245982  | 0.752875703 | 1           | ITFG2-AS1  |
| ENSG00000260305 | 0.925067711 | 0.356539013 | 1.257245982  | 0.752875703 | 1           | NTRK3-AS1  |
| ENSG00000256747 | 0.925067711 | 0.356539013 | 1.257245982  | 0.752875703 | 1           | AC009511.2 |
| ENSG00000234685 | 0.925067711 | 0.356539013 | 1.257245982  | 0.752875703 | 1           | NUS1P2     |
| ENSG00000248791 | 0.925067711 | 0.336469917 | 1.257245982  | 0.752875703 | 1           | AC010627.1 |
| ENSG00000249363 | 0.925067711 | 0.336469917 | 1.257245982  | 0.752875703 | 1           | AC011411.1 |
| ENSG00000286452 | 0.925067711 | 0.356539013 | 1.257245982  | 0.752875703 | 1           | AL355596.2 |
| ENSG00000202523 | 0.925067711 | 0.356539013 | 1.257245982  | 0.752875703 | 1           | RF00019    |
| ENSG00000214549 | 0.925067711 | 0.336469917 | 1.257245982  | 0.752875703 | 1           | SDHCP2     |
| ENSG00000255916 | 0.925067711 | 0.356539013 | 1.257245982  | 0.752875703 | 1           | AC148477.1 |
| ENSG00000259995 | 0.925067711 | 0.356539013 | 1.257245982  | 0.752875703 | 1           | AC106729.1 |
| ENSG00000244753 | 0.925067711 | 0.356539013 | 1.257245982  | 0.752875703 | 1           | RPL15P21   |
| ENSG00000283376 | 0.925067711 | 0.356539013 | 1.257245982  | 0.752875703 | 1           | AC011591.2 |
| ENSG00000286090 | 0.925067711 | 0.356539013 | 1.257245982  | 0.752875703 | 1           | AC034110.1 |
| ENSG00000171722 | 2.127007565 | 1.487519214 | 0.531459573  | 0.752887311 | 0.829443464 | SPATA46    |
| ENSG00000139350 | 521.9110021 | 546.5676876 | -0.066973394 | 0.753035867 | 0.82957195  | NEDD1      |
| ENSG00000226098 | 2.157237677 | 1.436768536 | 0.581853169  | 0.753214169 | 0.82972009  | SEC11B     |
| ENSG00000162039 | 5.48242415  | 4.158053576 | 0.385534694  | 0.753234211 | 0.82972009  | MEIOB      |
| ENSG00000255680 | 0.601596751 | 1.161661783 | -0.930222901 | 0.753258184 | 1           | AC091564.6 |
| ENSG00000110768 | 775.5965985 | 810.2809302 | -0.063276321 | 0.753350517 | 0.829813023 | GTF2H1     |
| ENSG00000106031 | 1.214547612 | 0.723690511 | 0.750625143  | 0.75344464  | 1           | HOXA13     |
| ENSG00000244371 | 1.214547612 | 0.723690511 | 0.750625143  | 0.75344464  | 1           | PFN1P8     |
| ENSG00000261978 | 1.214547612 | 0.723690511 | 0.750625143  | 0.75344464  | 1           | AC116025.1 |
| ENSG00000162426 | 109.2557763 | 100.8839998 | 0.114456179  | 0.753460683 | 0.829895736 | SLC45A1    |
| ENSG00000234753 | 3.576843098 | 4.617249819 | -0.366061791 | 0.753504532 | 0.829895736 | FOXP4-AS1  |
| ENSG00000275956 | 2.082916045 | 2.934900236 | -0.481322842 | 0.753521436 | 0.829895736 | AC104446.1 |
| ENSG00000248206 | 1.466204238 | 0.672939833 | 1.111115587  | 0.753628026 | 1           | AC074194.1 |
| ENSG00000239503 | 1.466204238 | 0.672939833 | 1.111115587  | 0.753628026 | 1           | MARK2P8    |
| ENSG00000251163 | 1.466204238 | 0.672939833 | 1.111115587  | 0.753628026 | 1           | PRELID3BP4 |
| ENSG00000267440 | 1.535511275 | 0.713078025 | 1.102998111  | 0.753677622 | 1           | LINC02594  |

|                 |             |             |              |             |             |            |
|-----------------|-------------|-------------|--------------|-------------|-------------|------------|
| ENSG00000144802 | 1261.503057 | 1448.030207 | -0.198847952 | 0.753706575 | 0.830035786 | NFKBIZ     |
| ENSG00000183963 | 2789.393905 | 2966.449472 | -0.088733061 | 0.753712492 | 0.830035786 | SMTN       |
| ENSG00000114026 | 423.5076163 | 395.654956  | 0.097578453  | 0.753801056 | 0.830098132 | OGG1       |
| ENSG00000249375 | 3.313832363 | 2.537067156 | 0.391860751  | 0.753890385 | 0.830153624 | CASC11     |
| ENSG00000183019 | 0.921306765 | 0.356539013 | 1.251896751  | 0.753912007 | 1           | MCEMP1     |
| ENSG00000225555 | 0.921306765 | 0.336469917 | 1.251896751  | 0.753912007 | 1           | AP000320.1 |
| ENSG00000200537 | 0.921306765 | 0.356539013 | 1.251896751  | 0.753912007 | 1           | RNY4P6     |
| ENSG00000265753 | 0.921306765 | 0.356539013 | 1.251896751  | 0.753912007 | 1           | RN7SL444P  |
| ENSG00000255553 | 0.921306765 | 0.356539013 | 1.251896751  | 0.753912007 | 1           | AP003733.3 |
| ENSG00000236811 | 0.921306765 | 0.336469917 | 1.251896751  | 0.753912007 | 1           | GAPDHP2    |
| novel.697       | 0.921306765 | 0.356539013 | 1.251896751  | 0.753912007 | 1           | -          |
| ENSG00000278598 | 0.921306765 | 0.356539013 | 1.251896751  | 0.753912007 | 1           | MIR6775    |
| ENSG00000251635 | 0.921306765 | 0.336469917 | 1.251896751  | 0.753912007 | 1           | LINC02278  |
| ENSG00000200594 | 0.921306765 | 0.336469917 | 1.251896751  | 0.753912007 | 1           | RNU6-824P  |
| ENSG00000285827 | 0.921306765 | 0.356539013 | 1.251896751  | 0.753912007 | 1           | AP001267.5 |
| ENSG00000266441 | 0.921306765 | 0.336469917 | 1.251896751  | 0.753912007 | 1           | AP005205.2 |
| ENSG00000254905 | 0.921306765 | 0.336469917 | 1.251896751  | 0.753912007 | 1           | AP001318.1 |
| ENSG00000278561 | 0.921306765 | 0.356539013 | 1.251896751  | 0.753912007 | 1           | PTPN20CP   |
| ENSG00000278840 | 0.921306765 | 0.336469917 | 1.251896751  | 0.753912007 | 1           | AC009878.1 |
| ENSG00000233603 | 0.921306765 | 0.336469917 | 1.251896751  | 0.753912007 | 1           | JTBP1      |
| ENSG00000234272 | 0.921306765 | 0.356539013 | 1.251896751  | 0.753912007 | 1           | RPL30P2    |
| ENSG00000267368 | 0.921306765 | 0.336469917 | 1.251896751  | 0.753912007 | 1           | UPK3BL1    |
| ENSG00000226048 | 0.921306765 | 0.356539013 | 1.251896751  | 0.753912007 | 1           | YBX1P8     |
| ENSG00000171478 | 0.921306765 | 0.356539013 | 1.251896751  | 0.753912007 | 1           | SPACA5B    |
| ENSG00000285751 | 0.921306765 | 0.356539013 | 1.251896751  | 0.753912007 | 1           | AC021723.2 |
| ENSG00000226899 | 0.921306765 | 0.336469917 | 1.251896751  | 0.753912007 | 1           | AL731577.1 |
| ENSG00000230801 | 0.921306765 | 0.336469917 | 1.251896751  | 0.753912007 | 1           | AL160175.1 |
| ENSG00000212497 | 0.921306765 | 0.356539013 | 1.251896751  | 0.753912007 | 1           | RNA5SP465  |
| ENSG00000244691 | 1.773306493 | 1.110911105 | 0.692276113  | 0.753915352 | 0.830153624 | RPL10AP1   |
| novel.615       | 15.51307319 | 18.39586775 | -0.245897316 | 0.75400172  | 0.83021354  | -          |
| ENSG00000162600 | 206.4882509 | 224.8601561 | -0.12423873  | 0.754105906 | 0.830293068 | OMA1       |
| ENSG00000273821 | 1.7871679   | 1.00940975  | 0.807143463  | 0.754283295 | 0.830347625 | AL096828.3 |
| ENSG00000279587 | 1.7871679   | 1.00940975  | 0.807143463  | 0.754283295 | 0.830347625 | AC006963.1 |
| ENSG00000178715 | 1.7871679   | 1.00940975  | 0.807143463  | 0.754283295 | 0.830347625 | AL450998.1 |
| ENSG00000163501 | 1.7871679   | 1.00940975  | 0.807143463  | 0.754283295 | 0.830347625 | IHH        |
| ENSG00000152457 | 258.7543853 | 244.5422442 | 0.08056612   | 0.754331708 | 0.830365736 | DCLRE1C    |
| ENSG00000087460 | 17248.369   | 16469.13556 | 0.066711703  | 0.754445113 | 0.83040861  | GNAS       |
| ENSG00000278434 | 5.425724871 | 4.402350354 | 0.313432481  | 0.754470892 | 0.83040861  | AC023830.3 |
| ENSG00000269921 | 5.747942182 | 4.666844622 | 0.300682736  | 0.754479109 | 0.83040861  | AC068620.1 |
| ENSG00000162825 | 101.4853073 | 111.9809573 | -0.141014115 | 0.754498505 | 0.83040861  | NBPF20     |
| ENSG00000263531 | 3.638556971 | 4.62670643  | -0.350457507 | 0.754672561 | 0.830564993 | AC130324.1 |
| ENSG00000145681 | 5.196705195 | 7.562890935 | -0.546590769 | 0.754925997 | 0.830803942 | HAPLN1     |
| ENSG00000186628 | 3.916682763 | 2.985650913 | 0.408786215  | 0.754960817 | 0.830803942 | FSD2       |
| ENSG00000229807 | 530.1043789 | 1112.515202 | -1.069524041 | 0.754996354 | 0.830803942 | XIST       |
| ENSG00000285877 | 13.4481355  | 11.35238035 | 0.248349711  | 0.755017585 | 0.830803942 | AC007448.4 |
| ENSG00000281357 | 13.09937776 | 10.97590063 | 0.24964006   | 0.75506978  | 0.830826188 | ARRDC3-AS1 |
| ENSG00000129226 | 1.804790254 | 2.629111901 | -0.526995332 | 0.755314037 | 0.831059755 | CD68       |
| ENSG00000287110 | 9.996942717 | 8.601697997 | 0.216073953  | 0.755347811 | 0.831061721 | AC112484.5 |
| ENSG00000256087 | 344.6392781 | 322.1547026 | 0.098124094  | 0.755415388 | 0.831100876 | ZNF432     |
| ENSG00000259802 | 16.42205693 | 14.03468307 | 0.226678071  | 0.755479856 | 0.831136609 | AC012640.2 |
| ENSG00000239797 | 1.229662669 | 1.803920035 | -0.557388458 | 0.755804748 | 0.831458829 | RPL21P39   |

|                 |             |             |              |             |             |            |
|-----------------|-------------|-------------|--------------|-------------|-------------|------------|
| ENSG00000065665 | 278.135122  | 255.1331079 | 0.125302593  | 0.75586204  | 0.831486648 | SEC61A2    |
| ENSG00000279670 | 0.894837599 | 1.447381022 | -0.684774127 | 0.755874602 | 1           | AL359922.3 |
| ENSG00000017260 | 2003.146884 | 2083.788938 | -0.056821128 | 0.756111988 | 0.831726388 | ATP2C1     |
| ENSG00000198873 | 583.9463526 | 649.3725419 | -0.153194163 | 0.756349648 | 0.831952591 | GRK5       |
| ENSG00000168298 | 3.068443981 | 1.782695063 | 0.780411291  | 0.756436016 | 0.831984316 | HIST1H1E   |
| ENSG00000116918 | 700.6409096 | 743.9679187 | -0.086691655 | 0.756442535 | 0.831984316 | TSNAX      |
| ENSG00000118181 | 29.23954795 | 25.92666444 | 0.173221431  | 0.756518551 | 0.8320327   | RPS25      |
| ENSG00000183246 | 0.923814062 | 1.487519214 | -0.682927678 | 0.756541572 | 1           | RIMBP3C    |
| ENSG00000259553 | 1.232169966 | 0.743759607 | 0.739944602  | 0.756599041 | 1           | AC140725.1 |
| ENSG00000242104 | 1.232169966 | 0.743759607 | 0.739944602  | 0.756599041 | 1           | LINC02618  |
| ENSG00000224729 | 10.34430427 | 12.79744962 | -0.304767427 | 0.756641035 | 0.832130712 | PCOLCE-AS1 |
| ENSG00000285188 | 2.113146158 | 1.467450118 | 0.537178947  | 0.756671724 | 0.832130712 | AC008397.2 |
| ENSG00000179295 | 3325.918385 | 3508.534387 | -0.077029938 | 0.756825945 | 0.832265085 | PTPN11     |
| ENSG00000168010 | 1027.058114 | 1137.882506 | -0.14761844  | 0.756945506 | 0.832361332 | ATG16L2    |
| ENSG00000259418 | 0.586481695 | 1.110911105 | -0.902732464 | 0.757038026 | 1           | AC091117.2 |
| ENSG00000256482 | 0.586481695 | 1.110911105 | -0.902732464 | 0.757038026 | 1           | AC023796.2 |
| ENSG00000252412 | 1.818651661 | 2.609042805 | -0.508861236 | 0.757066597 | 0.832459254 | RF00019    |
| ENSG00000179588 | 170.7677867 | 182.5954601 | -0.096600653 | 0.757202776 | 0.832571015 | ZFPM1      |
| ENSG00000234230 | 3.370531641 | 2.395427609 | 0.472148548  | 0.757260996 | 0.832571015 | ZFX-AS1    |
| ENSG00000135776 | 385.1393088 | 414.2610997 | -0.105646026 | 0.757264373 | 0.832571015 | ABCB10     |
| ENSG00000114062 | 1264.991759 | 1314.347108 | -0.055240115 | 0.757382235 | 0.832665362 | UBE3A      |
| ENSG00000242797 | 3.591958154 | 4.656232136 | -0.371583692 | 0.757422025 | 0.832673873 | GLYCTK-AS1 |
| ENSG00000179361 | 131.2716902 | 123.0245952 | 0.093841634  | 0.757455638 | 0.832675591 | ARID3B     |
| ENSG00000272092 | 10.08136481 | 11.77041092 | -0.228567494 | 0.757503185 | 0.832692627 | AC087623.2 |
| ENSG00000140987 | 24.45295837 | 27.06722965 | -0.148338193 | 0.757595607 | 0.832758989 | ZSCAN32    |
| ENSG00000166321 | 65.12577917 | 70.63282121 | -0.11722601  | 0.757633359 | 0.832765254 | NUDT13     |
| ENSG00000110344 | 498.3507175 | 532.2226267 | -0.094758665 | 0.757693602 | 0.832796238 | UBE4A      |
| ENSG00000227376 | 1.214547612 | 1.773238453 | -0.552049942 | 0.757790469 | 0.832864896 | FTH1P16    |
| ENSG00000141028 | 7.20411723  | 9.408105037 | -0.388052948 | 0.757820182 | 0.832864896 | CDRT15P1   |
| ENSG00000158195 | 2844.391746 | 2960.423903 | -0.057702369 | 0.757912888 | 0.832916411 | WASF2      |
| ENSG00000141699 | 868.0693949 | 920.1873301 | -0.083726289 | 0.757931173 | 0.832916411 | RETREG3    |
| ENSG00000167967 | 738.0006847 | 698.1091712 | 0.080115344  | 0.757990853 | 0.832946765 | E4F1       |
| ENSG00000235267 | 1.773306493 | 2.567748738 | -0.519082308 | 0.758054548 | 0.832981527 | AC074117.2 |
| novel.885       | 267.056304  | 178.362897  | 0.582494781  | 0.758284918 | 0.83316502  | -          |
| ENSG00000185619 | 1031.804119 | 1105.009317 | -0.098621083 | 0.758285673 | 0.83316502  | PCGF3      |
| ENSG00000156873 | 490.1032181 | 465.9145899 | 0.073047303  | 0.75838484  | 0.83321395  | PHKG2      |
| ENSG00000276863 | 2.417741115 | 1.823989131 | 0.41702568   | 0.758394346 | 0.83321395  | AC124319.4 |
| ENSG00000259924 | 2.728604316 | 3.587770973 | -0.395304246 | 0.758502242 | 0.833279858 | AC011939.1 |
| novel.365       | 18.91669825 | 14.70903557 | 0.357126925  | 0.75851848  | 0.833279858 | -          |
| ENSG00000251203 | 0.894837599 | 1.456837632 | -0.693471177 | 0.758540653 | 1           | AC011726.1 |
| ENSG00000198818 | 945.8595184 | 895.8572294 | 0.078574906  | 0.758574852 | 0.833306551 | SFT2D1     |
| ENSG00000231887 | 2.431602522 | 1.722487775 | 0.475900671  | 0.758695533 | 0.833389737 | PRH1       |
| ENSG00000221818 | 539.0841206 | 632.5726077 | -0.230892792 | 0.758746676 | 0.833389737 | EBF2       |
| ENSG00000203999 | 19.66797845 | 16.90822015 | 0.218961709  | 0.758746809 | 0.833389737 | LINC01270  |
| ENSG00000285602 | 0.307102255 | 0.774441189 | -1.237157226 | 0.758840351 | 1           | AC097625.2 |
| ENSG00000286341 | 0.307102255 | 0.774441189 | -1.237157226 | 0.758840351 | 1           | AP002762.2 |
| ENSG00000213246 | 0.307102255 | 0.774441189 | -1.237157226 | 0.758840351 | 1           | SUPT4H1    |
| ENSG00000270110 | 0.307102255 | 0.774441189 | -1.237157226 | 0.758840351 | 1           | AL353593.2 |
| ENSG00000208308 | 0.293240848 | 0.774441189 | -1.237157226 | 0.758840351 | 1           | SNORA40B   |
| ENSG00000231767 | 0.307102255 | 0.774441189 | -1.237157226 | 0.758840351 | 1           | AL136454.1 |
| ENSG00000261332 | 0.293240848 | 0.774441189 | -1.237157226 | 0.758840351 | 1           | AC116348.2 |

|                 |             |             |              |             |             |            |
|-----------------|-------------|-------------|--------------|-------------|-------------|------------|
| ENSG00000252242 | 0.293240848 | 0.774441189 | -1.237157226 | 0.758840351 | 1           | RNU7-115P  |
| ENSG00000258422 | 0.293240848 | 0.774441189 | -1.237157226 | 0.758840351 | 1           | AL160191.1 |
| ENSG00000269421 | 0.293240848 | 0.774441189 | -1.237157226 | 0.758840351 | 1           | AC011503.3 |
| ENSG00000280968 | 0.293240848 | 0.774441189 | -1.237157226 | 0.758840351 | 1           | AC002059.2 |
| ENSG00000237222 | 0.307102255 | 0.774441189 | -1.237157226 | 0.758840351 | 1           | LINC01968  |
| ENSG00000230204 | 0.293240848 | 0.774441189 | -1.237157226 | 0.758840351 | 1           | FTH1P5     |
| ENSG00000261670 | 0.293240848 | 0.774441189 | -1.237157226 | 0.758840351 | 1           | AC012213.2 |
| ENSG00000256021 | 0.293240848 | 0.774441189 | -1.237157226 | 0.758840351 | 1           | ELOCP31    |
| ENSG00000201793 | 0.293240848 | 0.774441189 | -1.237157226 | 0.758840351 | 1           | RN7SKP9    |
| ENSG00000259245 | 0.293240848 | 0.774441189 | -1.237157226 | 0.758840351 | 1           | AC040918.1 |
| ENSG00000240311 | 0.293240848 | 0.774441189 | -1.237157226 | 0.758840351 | 1           | AC004224.1 |
| ENSG00000269416 | 0.307102255 | 0.774441189 | -1.237157226 | 0.758840351 | 1           | LINC01224  |
| ENSG00000230175 | 0.293240848 | 0.774441189 | -1.237157226 | 0.758840351 | 1           | AL451074.3 |
| ENSG00000235386 | 0.307102255 | 0.774441189 | -1.237157226 | 0.758840351 | 1           | AC113174.1 |
| ENSG00000224237 | 0.293240848 | 0.774441189 | -1.237157226 | 0.758840351 | 1           | MICOS10P3  |
| ENSG00000242308 | 0.307102255 | 0.774441189 | -1.237157226 | 0.758840351 | 1           | AC048334.1 |
| ENSG00000240758 | 0.293240848 | 0.774441189 | -1.237157226 | 0.758840351 | 1           | AC010655.2 |
| ENSG00000213498 | 0.293240848 | 0.774441189 | -1.237157226 | 0.758840351 | 1           | TPT1P13    |
| ENSG00000229237 | 0.293240848 | 0.774441189 | -1.237157226 | 0.758840351 | 1           | HMG1P37    |
| ENSG00000200834 | 0.293240848 | 0.774441189 | -1.237157226 | 0.758840351 | 1           | RF00019    |
| ENSG00000275239 | 0.293240848 | 0.774441189 | -1.237157226 | 0.758840351 | 1           | FAM242F    |
| ENSG00000199122 | 0.293240848 | 0.774441189 | -1.237157226 | 0.758840351 | 1           | MIR148B    |
| ENSG00000258510 | 0.293240848 | 0.774441189 | -1.237157226 | 0.758840351 | 1           | AC007954.1 |
| ENSG00000243445 | 0.307102255 | 0.774441189 | -1.237157226 | 0.758840351 | 1           | AC106820.1 |
| ENSG00000261481 | 0.293240848 | 0.774441189 | -1.237157226 | 0.758840351 | 1           | AC022167.4 |
| ENSG00000261369 | 0.293240848 | 0.774441189 | -1.237157226 | 0.758840351 | 1           | AC007533.1 |
| ENSG00000267568 | 0.293240848 | 0.774441189 | -1.237157226 | 0.758840351 | 1           | AC016168.2 |
| ENSG00000238205 | 0.308355904 | 0.774441189 | -1.237157226 | 0.758840351 | 1           | MPC1L      |
| ENSG00000210049 | 0.308355904 | 0.774441189 | -1.237157226 | 0.758840351 | 1           | MT-TF      |
| ENSG00000225230 | 0.308355904 | 0.774441189 | -1.237157226 | 0.758840351 | 1           | AC008937.1 |
| ENSG00000278385 | 0.308355904 | 0.774441189 | -1.237157226 | 0.758840351 | 1           | AC121338.2 |
| ENSG00000250197 | 0.308355904 | 0.774441189 | -1.237157226 | 0.758840351 | 1           | HMG1P15    |
| ENSG00000264354 | 0.308355904 | 0.774441189 | -1.237157226 | 0.758840351 | 1           | MIR3134    |
| ENSG00000278900 | 0.308355904 | 0.774441189 | -1.237157226 | 0.758840351 | 1           | AC139792.2 |
| ENSG00000113196 | 0.308355904 | 0.774441189 | -1.237157226 | 0.758840351 | 1           | HAND1      |
| ENSG00000275572 | 0.308355904 | 0.774441189 | -1.237157226 | 0.758840351 | 1           | GRIFIN     |
| ENSG00000204071 | 0.308355904 | 0.774441189 | -1.237157226 | 0.758840351 | 1           | TCEAL6     |
| ENSG00000255375 | 0.308355904 | 0.774441189 | -1.237157226 | 0.758840351 | 1           | AL078612.2 |
| ENSG00000200135 | 0.308355904 | 0.774441189 | -1.237157226 | 0.758840351 | 1           | RF00019    |
| ENSG00000140505 | 0.308355904 | 0.774441189 | -1.237157226 | 0.758840351 | 1           | CYP1A2     |
| ENSG00000241954 | 1.17296339  | 2.038888596 | -0.799412278 | 0.759049625 | 0.833687098 | AL021937.4 |
| ENSG00000235319 | 1.218308559 | 1.773238453 | -0.549009851 | 0.759115996 | 0.83372475  | AC012360.1 |
| ENSG00000243107 | 9.284525978 | 7.174386071 | 0.373314322  | 0.75928454  | 0.833873989 | AC000120.1 |
| ENSG00000131845 | 191.4845175 | 179.8965559 | 0.090756805  | 0.75931607  | 0.833873989 | AC005261.1 |
| ENSG00000265845 | 4.837989527 | 3.903015919 | 0.304052249  | 0.759361061 | 0.833888149 | AC024267.4 |
| ENSG00000274422 | 16.97712614 | 14.72422438 | 0.205077498  | 0.759484047 | 0.833953329 | AC245060.5 |
| ENSG00000267325 | 15.35873115 | 12.34069352 | 0.310845083  | 0.759484612 | 0.833953329 | LINC01415  |
| ENSG00000251307 | 3.312578714 | 2.578361223 | 0.377359462  | 0.759516906 | 0.833953542 | AC026704.1 |
| ENSG00000273264 | 3.978396636 | 5.820334064 | -0.555857905 | 0.759618464 | 0.834029806 | AL360219.1 |
| novel.178       | 0.615458159 | 1.161661783 | -0.90468078  | 0.759678675 | 1           | -          |
| ENSG00000189238 | 3.389407643 | 2.261960402 | 0.592879447  | 0.759732969 | 0.834113508 | LINC00943  |

|                 |             |             |              |             |             |             |
|-----------------|-------------|-------------|--------------|-------------|-------------|-------------|
| ENSG00000283445 | 2.096777453 | 1.487519214 | 0.515520993  | 0.759758907 | 0.834113508 | AL136985.3  |
| ENSG00000273302 | 8.501762016 | 7.071600447 | 0.277952354  | 0.759796496 | 0.834119529 | AC016747.3  |
| ENSG00000235449 | 0.586481695 | 1.10029862  | -0.891770176 | 0.760083316 | 1           | AC098934.3  |
| ENSG00000111907 | 168.5592774 | 134.1307651 | 0.328894715  | 0.760109125 | 0.83442748  | TPD52L1     |
| ENSG00000270282 | 1.203193503 | 0.743759607 | 0.713115423  | 0.760164501 | 1           | AL096855.1  |
| novel.107       | 15.85423778 | 18.6613895  | -0.232731842 | 0.760190793 | 0.834469724 | -           |
| ENSG00000103852 | 405.1903201 | 387.4751289 | 0.065116425  | 0.760211885 | 0.834469724 | TTC23       |
| ENSG00000143149 | 1224.783284 | 1315.251073 | -0.103059658 | 0.760243961 | 0.834469724 | ALDH9A1     |
| ENSG00000266933 | 2.40137241  | 3.5169512   | -0.552179174 | 0.760309065 | 0.834481848 | AC005775.1  |
| ENSG00000261335 | 6.154581587 | 4.505135979 | 0.439787938  | 0.760319245 | 0.834481848 | AC005837.1  |
| ENSG00000207971 | 1.218308559 | 1.793307549 | -0.560897212 | 0.760351886 | 0.834482421 | MIR125B1    |
| ENSG00000285043 | 18.38781347 | 21.11818027 | -0.199229722 | 0.760426087 | 0.834528604 | AC093512.2  |
| ENSG00000236047 | 3.077290793 | 2.058957692 | 0.563458191  | 0.760521248 | 0.834597784 | AC073410.1  |
| ENSG00000019995 | 335.1665463 | 312.9754488 | 0.099327419  | 0.760573524 | 0.834619899 | ZRANB1      |
| ENSG00000286138 | 1.828752122 | 2.751966622 | -0.600210508 | 0.760665716 | 0.834685812 | AC010336.8  |
| ENSG00000236953 | 1.773306493 | 1.130980201 | 0.672376962  | 0.760806131 | 0.834804633 | ZDHHC20-IT1 |
| ENSG00000229728 | 12.04712135 | 10.36316809 | 0.216856393  | 0.761026164 | 0.835010802 | AL136531.1  |
| ENSG00000261656 | 1.847628125 | 1.069617038 | 0.783308225  | 0.761072133 | 0.835025975 | BEAN1-AS1   |
| ENSG00000279652 | 4.41372777  | 6.123682254 | -0.467100144 | 0.761116779 | 0.835039695 | Z82217.1    |
| ENSG00000174796 | 289.3767278 | 274.3358491 | 0.077697627  | 0.761154357 | 0.835045661 | THAP6       |
| ENSG00000268230 | 46.27058133 | 41.71575396 | 0.151735893  | 0.761212957 | 0.835050428 | AC012313.3  |
| ENSG00000164251 | 43.04041561 | 52.79127656 | -0.296449622 | 0.761222983 | 0.835050428 | F2RL1       |
| ENSG00000260628 | 2.387511003 | 1.426156051 | 0.743013504  | 0.761337359 | 0.83513403  | AC142381.3  |
| ENSG00000237641 | 5.365264647 | 4.168666062 | 0.356155956  | 0.761363483 | 0.83513403  | AC073476.1  |
| ENSG00000131979 | 150.4135325 | 134.9295821 | 0.156586148  | 0.761590379 | 0.835298385 | GCH1        |
| ENSG00000055483 | 892.4350686 | 939.5682315 | -0.074164252 | 0.76161597  | 0.835298385 | AC022966.1  |
| ENSG00000214944 | 467.6814087 | 529.5847258 | -0.179491582 | 0.761623528 | 0.835298385 | ARHGEF28    |
| ENSG00000167637 | 120.6714702 | 113.5081008 | 0.088412107  | 0.761641921 | 0.835298385 | ZNF283      |
| ENSG00000280187 | 47.52280968 | 53.5490691  | -0.173814248 | 0.761808977 | 0.835446331 | AC022107.1  |
| ENSG00000258034 | 1.511549406 | 2.140389951 | -0.503310211 | 0.761876024 | 0.835484593 | AC012157.1  |
| ENSG00000270409 | 3.00422281  | 2.169915658 | 0.473664668  | 0.761931787 | 0.835510478 | AC090950.1  |
| ENSG00000255343 | 1.214547612 | 0.743759607 | 0.723210006  | 0.762009584 | 1           | AC234917.1  |
| ENSG00000228413 | 1.214547612 | 0.743759607 | 0.723210006  | 0.762009584 | 1           | AC024937.1  |
| ENSG00000267504 | 1.214547612 | 0.743759607 | 0.723210006  | 0.762009584 | 1           | AC090236.2  |
| ENSG00000189409 | 8.60631376  | 6.458996296 | 0.411950756  | 0.762068177 | 0.83562477  | MMP23B      |
| ENSG00000269906 | 19.0297408  | 21.57159714 | -0.179961599 | 0.762254074 | 0.835793336 | AL606834.1  |
| ENSG00000123297 | 9.03405173  | 7.388129662 | 0.284765034  | 0.762396095 | 0.83591378  | TFSM        |
| ENSG00000231728 | 4.193554905 | 3.280826763 | 0.363897308  | 0.762488621 | 0.83597995  | TMSB15B-AS1 |
| ENSG00000151726 | 1268.337    | 1359.892478 | -0.100448726 | 0.762580815 | 0.836045748 | ACSL1       |
| ENSG00000229870 | 2.158491326 | 3.189937893 | -0.570158188 | 0.762641806 | 0.836077335 | RPL21P89    |
| ENSG00000226281 | 1.230916317 | 0.672939833 | 0.843302326  | 0.762697902 | 1           | AL031123.1  |
| novel.244       | 4.562371034 | 3.607840069 | 0.339685539  | 0.762720887 | 0.83612875  | -           |
| ENSG00000129071 | 682.2633696 | 723.2782996 | -0.084533336 | 0.762856025 | 0.836241609 | MBD4        |
| ENSG00000250015 | 2.698374204 | 3.53586442  | -0.392044123 | 0.762954955 | 0.83631477  | AC018752.1  |
| ENSG00000286360 | 11.69592758 | 10.06914812 | 0.219821272  | 0.763011782 | 0.836341776 | AC107081.4  |
| ENSG00000219642 | 1.229662669 | 1.773238453 | -0.539659438 | 0.7631984   | 0.836511037 | BMPR1AP1    |
| ENSG00000272155 | 5.834871573 | 7.3467072   | -0.330352443 | 0.763321883 | 0.836579818 | AC055822.1  |
| ENSG00000284738 | 8.7660264   | 7.500243502 | 0.223015918  | 0.76332659  | 0.836579818 | AL358472.5  |
| ENSG00000196096 | 1.480065645 | 2.129777466 | -0.520156357 | 0.763385743 | 0.836579818 | AC079610.1  |
| ENSG00000163346 | 1630.3639   | 1765.743311 | -0.115021009 | 0.763389951 | 0.836579818 | PBXIP1      |
| ENSG00000277883 | 0.879722543 | 1.41669944  | -0.67906481  | 0.763494645 | 1           | NLRP3P1     |

|                 |             |             |              |             |             |            |
|-----------------|-------------|-------------|--------------|-------------|-------------|------------|
| ENSG00000261737 | 10.65899969 | 12.28981445 | -0.204857146 | 0.763515377 | 0.836681978 | AL049597.2 |
| ENSG00000198569 | 5.069516502 | 6.369263301 | -0.329008818 | 0.76355484  | 0.836689933 | SLC34A3    |
| ENSG00000251484 | 1.81990531  | 2.51699806  | -0.468040141 | 0.763683229 | 0.836795326 | AL356488.1 |
| ENSG00000224464 | 2.108131562 | 1.386017859 | 0.592613072  | 0.763776671 | 0.83686242  | PGAM1P6    |
| ENSG00000257052 | 2.43410982  | 1.742556871 | 0.465890954  | 0.763890984 | 0.83692442  | AP003721.4 |
| ENSG00000275139 | 2.140868972 | 2.842855491 | -0.417868904 | 0.763899339 | 0.83692442  | AL133492.1 |
| novel.429       | 26.9992131  | 30.62894254 | -0.183635173 | 0.763929896 | 0.83692442  | -          |
| ENSG00000224764 | 0.61420451  | 1.130980201 | -0.873915934 | 0.763958908 | 1           | AL353768.1 |
| ENSG00000273599 | 37.84661716 | 42.23862512 | -0.154176367 | 0.764043419 | 0.836939021 | AL731571.1 |
| ENSG00000074590 | 549.7503463 | 510.6189482 | 0.106040699  | 0.764050611 | 0.836939021 | NUAK1      |
| ENSG00000236809 | 2.12199297  | 2.934900236 | -0.461232613 | 0.764093173 | 0.836939021 | SNX25P1    |
| ENSG00000256116 | 2.729857965 | 1.844058227 | 0.573639584  | 0.764108043 | 0.836939021 | AP001453.1 |
| ENSG00000177666 | 1690.198774 | 1784.506403 | -0.078150231 | 0.764134834 | 0.836939021 | PNPLA2     |
| ENSG00000102387 | 17.10932942 | 13.87079107 | 0.296144115  | 0.764148437 | 0.836939021 | TAF7L      |
| ENSG00000266712 | 1.774560141 | 1.00940975  | 0.798989985  | 0.764197573 | 0.836939021 | MIR3149    |
| ENSG00000259595 | 3.297463658 | 2.567748738 | 0.375489593  | 0.764200931 | 0.836939021 | AC025043.1 |
| novel.518       | 30.91464221 | 34.08563927 | -0.138194566 | 0.764324085 | 0.837011345 | -          |
| ENSG00000273597 | 0.879722543 | 1.782695063 | -1.014373769 | 0.764330411 | 1           | AL355377.1 |
| ENSG00000265474 | 0.879722543 | 1.782695063 | -1.014373769 | 0.764330411 | 1           | AC010761.5 |
| ENSG00000271410 | 0.879722543 | 1.782695063 | -1.014373769 | 0.764330411 | 1           | AC020728.1 |
| ENSG00000270760 | 4.255268779 | 2.852312101 | 0.574765884  | 0.764338637 | 0.837011345 | AD001527.1 |
| ENSG00000238041 | 3.870083945 | 5.187532422 | -0.426801554 | 0.764363619 | 0.837011345 | AP004245.1 |
| ENSG00000241316 | 54.65177891 | 49.36739759 | 0.142875938  | 0.764449316 | 0.837069907 | SUCLG2-AS1 |
| ENSG00000177954 | 9628.775817 | 8935.697329 | 0.107776993  | 0.764499511 | 0.83708959  | RPS27      |
| ENSG00000231393 | 2.973992698 | 2.140389951 | 0.476968413  | 0.764577498 | 0.837139701 | AL357874.2 |
| ENSG00000225544 | 12.44623886 | 10.56732668 | 0.240183311  | 0.764616823 | 0.837147479 | AC245452.2 |
| ENSG00000206914 | 1.22840902  | 2.058957692 | -0.756017298 | 0.764671493 | 0.837172056 | RF00019    |
| ENSG00000277462 | 45.28275956 | 41.07354289 | 0.138979812  | 0.764713001 | 0.837182222 | ZNF670     |
| ENSG00000157240 | 1331.319898 | 1496.094091 | -0.168502537 | 0.764828685 | 0.837273588 | FZD1       |
| ENSG00000264273 | 0.616711807 | 1.130980201 | -0.869412247 | 0.76511459  | 1           | AC107982.2 |
| ENSG00000228549 | 2.767681241 | 4.005673149 | -0.533741626 | 0.765263469 | 0.837714258 | BX284668.2 |
| ENSG00000118496 | 567.4627556 | 593.2471658 | -0.064014557 | 0.765302582 | 0.837721778 | FBXO30     |
| ENSG00000171217 | 10.86914337 | 9.101160827 | 0.248374092  | 0.765400075 | 0.837773198 | CLDN20     |
| ENSG00000171097 | 7.577947953 | 6.45069556  | 0.230986779  | 0.765414049 | 0.837773198 | KYAT1      |
| ENSG00000234322 | 4.282991593 | 5.430673325 | -0.343437133 | 0.765467959 | 0.83779691  | ST13P18    |
| ENSG00000238840 | 0.879722543 | 0.356539013 | 1.191364526  | 0.765662461 | 1           | RF00096    |
| ENSG00000279679 | 0.879722543 | 0.356539013 | 1.191364526  | 0.765662461 | 1           | AC091925.2 |
| ENSG00000254879 | 0.879722543 | 0.387220594 | 1.191364526  | 0.765662461 | 1           | PTPRJ-AS1  |
| ENSG00000102145 | 0.879722543 | 0.387220594 | 1.191364526  | 0.765662461 | 1           | GATA1      |
| ENSG00000259242 | 0.879722543 | 0.387220594 | 1.191364526  | 0.765662461 | 1           | AC002306.1 |
| ENSG00000185792 | 0.879722543 | 0.387220594 | 1.191364526  | 0.765662461 | 1           | NLRP9      |
| ENSG00000229111 | 0.879722543 | 0.356539013 | 1.191364526  | 0.765662461 | 1           | MED4-AS1   |
| ENSG00000261117 | 0.879722543 | 0.356539013 | 1.191364526  | 0.765662461 | 1           | AC009486.1 |
| ENSG00000248564 | 0.879722543 | 0.356539013 | 1.191364526  | 0.765662461 | 1           | AC079140.1 |
| ENSG00000237766 | 0.879722543 | 0.387220594 | 1.191364526  | 0.765662461 | 1           | GGTA2P     |
| ENSG00000250603 | 0.879722543 | 0.356539013 | 1.191364526  | 0.765662461 | 1           | AC068658.1 |
| ENSG00000286530 | 0.879722543 | 0.356539013 | 1.191364526  | 0.765662461 | 1           | AC108057.1 |
| ENSG00000229065 | 0.879722543 | 0.356539013 | 1.191364526  | 0.765662461 | 1           | AL354893.2 |
| ENSG00000269895 | 0.879722543 | 0.387220594 | 1.191364526  | 0.765662461 | 1           | AP000654.1 |
| ENSG00000267959 | 0.879722543 | 0.387220594 | 1.191364526  | 0.765662461 | 1           | MIR3188    |
| ENSG00000226772 | 0.879722543 | 0.356539013 | 1.191364526  | 0.765662461 | 1           | AL021393.1 |

|                 |             |             |              |             |             |                 |
|-----------------|-------------|-------------|--------------|-------------|-------------|-----------------|
| ENSG00000196277 | 0.879722543 | 0.356539013 | 1.191364526  | 0.765662461 | 1           | GRM7            |
| ENSG00000243986 | 0.879722543 | 0.387220594 | 1.191364526  | 0.765662461 | 1           | ENO1P3          |
| ENSG00000232913 | 0.879722543 | 0.356539013 | 1.191364526  | 0.765662461 | 1           | PLCE1-AS2       |
| ENSG00000244391 | 0.879722543 | 0.356539013 | 1.191364526  | 0.765662461 | 1           | RN7SL330P       |
| ENSG00000259926 | 0.879722543 | 0.387220594 | 1.191364526  | 0.765662461 | 1           | AC007342.1      |
| ENSG00000260166 | 0.879722543 | 0.356539013 | 1.191364526  | 0.765662461 | 1           | AC134312.3      |
| ENSG00000266900 | 0.879722543 | 0.356539013 | 1.191364526  | 0.765662461 | 1           | AC027514.1      |
| ENSG00000234148 | 0.879722543 | 0.387220594 | 1.191364526  | 0.765662461 | 1           | LINC01961       |
| ENSG00000207448 | 0.879722543 | 0.356539013 | 1.191364526  | 0.765662461 | 1           | RNU6-520P       |
| ENSG00000286723 | 0.879722543 | 0.356539013 | 1.191364526  | 0.765662461 | 1           | AL021368.5      |
| ENSG00000227748 | 0.879722543 | 0.387220594 | 1.191364526  | 0.765662461 | 1           | AL138916.1      |
| ENSG00000229502 | 0.879722543 | 0.356539013 | 1.191364526  | 0.765662461 | 1           | AL391863.1      |
| ENSG00000251276 | 0.879722543 | 0.356539013 | 1.191364526  | 0.765662461 | 1           | MAGI2-AS1       |
| ENSG00000253273 | 0.879722543 | 0.356539013 | 1.191364526  | 0.765662461 | 1           | AC022826.1      |
| ENSG00000255786 | 0.879722543 | 0.387220594 | 1.191364526  | 0.765662461 | 1           | AP000763.1      |
| ENSG00000221230 | 0.879722543 | 0.387220594 | 1.191364526  | 0.765662461 | 1           | MIR548L         |
| ENSG00000224776 | 0.879722543 | 0.356539013 | 1.191364526  | 0.765662461 | 1           | RPSAP50         |
| ENSG00000274303 | 0.879722543 | 0.356539013 | 1.191364526  | 0.765662461 | 1           | RF00100         |
| ENSG00000224289 | 0.879722543 | 0.356539013 | 1.191364526  | 0.765662461 | 1           | IFIT6P          |
| ENSG00000215467 | 0.879722543 | 0.387220594 | 1.191364526  | 0.765662461 | 1           | RPL27AP         |
| ENSG00000277022 | 0.879722543 | 0.356539013 | 1.191364526  | 0.765662461 | 1           | AL031663.3      |
| novel.69        | 0.879722543 | 0.336469917 | 1.191364526  | 0.765662461 | 1           | -               |
| ENSG00000234584 | 0.879722543 | 0.336469917 | 1.191364526  | 0.765662461 | 1           | AC019186.1      |
| ENSG00000279212 | 0.879722543 | 0.336469917 | 1.191364526  | 0.765662461 | 1           | AL390961.3      |
| ENSG00000230702 | 0.879722543 | 0.336469917 | 1.191364526  | 0.765662461 | 1           | AC107081.1      |
| ENSG00000287621 | 0.879722543 | 0.336469917 | 1.191364526  | 0.765662461 | 1           | AC021851.2      |
| ENSG00000212464 | 0.879722543 | 0.336469917 | 1.191364526  | 0.765662461 | 1           | SNORA12         |
| ENSG00000139223 | 0.879722543 | 0.336469917 | 1.191364526  | 0.765662461 | 1           | ANP32D          |
| ENSG00000279251 | 0.879722543 | 0.336469917 | 1.191364526  | 0.765662461 | 1           | AC015726.3      |
| ENSG00000224541 | 0.879722543 | 0.336469917 | 1.191364526  | 0.765662461 | 1           | AP001439.1      |
| ENSG00000223873 | 0.879722543 | 0.336469917 | 1.191364526  | 0.765662461 | 1           | SAP18P2         |
| ENSG00000230999 | 0.879722543 | 0.336469917 | 1.191364526  | 0.765662461 | 1           | MTND5P8         |
| ENSG00000136931 | 0.879722543 | 0.336469917 | 1.191364526  | 0.765662461 | 1           | NR5A1           |
| ENSG00000253030 | 0.879722543 | 0.336469917 | 1.191364526  | 0.765662461 | 1           | MIR2116         |
| ENSG00000248871 | 0.879722543 | 0.336469917 | 1.191364526  | 0.765662461 | 1           | TNFSF12-TNFSF13 |
| ENSG00000201183 | 1.188078446 | 1.885352294 | -0.647623502 | 0.765669729 | 0.837982444 | RNVU1-3         |
| ENSG00000254138 | 1.201939854 | 1.722487775 | -0.532528884 | 0.765766387 | 0.838052928 | AC113386.1      |
| ENSG00000148225 | 57.85375109 | 50.28249803 | 0.198628545  | 0.765821202 | 0.838077614 | WDR31           |
| ENSG00000259408 | 7.783005762 | 9.487225546 | -0.288313573 | 0.765895655 | 0.838117199 | AC010809.2      |
| ENSG00000272906 | 3.01557692  | 2.191140629 | 0.468596407  | 0.765933322 | 0.838117199 | AL353708.3      |
| ENSG00000120149 | 24.56524547 | 18.97278164 | 0.375957485  | 0.76595415  | 0.838117199 | MSX2            |
| ENSG00000231344 | 1.83125942  | 2.558292127 | -0.478865259 | 0.766003527 | 0.838135929 | AL020997.1      |
| ENSG00000084093 | 683.2283257 | 711.5305479 | -0.05841236  | 0.766049676 | 0.838139254 | REST            |
| ENSG00000285215 | 2.990361403 | 2.200597239 | 0.454061284  | 0.766071085 | 0.838139254 | AC241377.4      |
| ENSG00000215252 | 525.1174785 | 579.1581239 | -0.140835201 | 0.766243323 | 0.838292394 | GOLGA8B         |
| ENSG00000100504 | 1220.607727 | 1165.212975 | 0.066965978  | 0.766373255 | 0.83839924  | PYGL            |
| novel.108       | 5.843718385 | 7.520312598 | -0.367560069 | 0.766431769 | 0.838427949 | -               |
| ENSG00000238140 | 1.232169966 | 0.672939833 | 0.845579348  | 0.766579978 | 1           | AC104170.2      |
| ENSG00000250050 | 1.232169966 | 0.672939833 | 0.845579348  | 0.766579978 | 1           | MTND4P9         |
| ENSG00000253385 | 2.376156893 | 1.426156051 | 0.736754934  | 0.76663993  | 0.838620354 | AP003696.1      |
| ENSG00000255346 | 6.874306755 | 8.602982267 | -0.329625714 | 0.766723527 | 0.838648186 | NOX5            |

|                 |             |             |              |             |             |            |
|-----------------|-------------|-------------|--------------|-------------|-------------|------------|
| ENSG00000217644 | 4.427589177 | 3.302051734 | 0.434902453  | 0.766729932 | 0.838648186 | AL355864.1 |
| ENSG00000287094 | 2.34592678  | 1.386017859 | 0.754766661  | 0.766852626 | 0.838747078 | AL049552.2 |
| ENSG00000252641 | 1.229662669 | 0.672939833 | 0.843045199  | 0.767287721 | 1           | RNU6-678P  |
| ENSG00000168367 | 1.541779519 | 2.557136252 | -0.731077859 | 0.767455096 | 0.839370694 | LINC00917  |
| ENSG00000253848 | 0.923814062 | 1.447381022 | -0.651329229 | 0.767529517 | 1           | AC010834.2 |
| ENSG00000279469 | 3.560474393 | 2.598430319 | 0.469393406  | 0.767606965 | 0.839501455 | AC109454.4 |
| ENSG00000279432 | 10.39068963 | 12.7785364  | -0.291970451 | 0.767639295 | 0.839501474 | AC015799.1 |
| ENSG00000162413 | 1223.646751 | 1276.763153 | -0.061467574 | 0.767717771 | 0.839551957 | KLHL21     |
| ENSG00000243144 | 1.480065645 | 2.10970837  | -0.509676511 | 0.767907809 | 0.839724432 | AC079760.2 |
| ENSG00000255159 | 1.466204238 | 0.713078025 | 1.04111767   | 0.768210754 | 1           | AC026894.1 |
| ENSG00000237243 | 1.466204238 | 0.713078025 | 1.04111767   | 0.768210754 | 1           | AC022173.1 |
| ENSG00000152086 | 1.466204238 | 0.713078025 | 1.04111767   | 0.768210754 | 1           | TUBA3E     |
| ENSG00000207331 | 1.466204238 | 0.713078025 | 1.04111767   | 0.768210754 | 1           | RNU6-1263P |
| ENSG00000266744 | 1.466204238 | 0.713078025 | 1.04111767   | 0.768210754 | 1           | AC005304.3 |
| ENSG00000242791 | 1.536764924 | 2.191140629 | -0.511425613 | 0.768271823 | 0.840039683 | AC117395.1 |
| ENSG00000168818 | 681.9753847 | 651.4179115 | 0.065708816  | 0.768310463 | 0.840039683 | STX18      |
| ENSG00000215301 | 4837.894903 | 4622.326446 | 0.065776709  | 0.768325177 | 0.840039683 | DDX3X      |
| ENSG00000204947 | 70.66601406 | 64.38679782 | 0.131548996  | 0.76832543  | 0.840039683 | ZNF425     |
| ENSG00000247317 | 16.26617651 | 13.62508163 | 0.253315657  | 0.768427617 | 0.840116055 | LY6E-DT    |
| ENSG00000200534 | 21.09127354 | 23.61048574 | -0.162575457 | 0.768505068 | 0.840165376 | SNORA33    |
| ENSG00000135365 | 1006.659341 | 1098.810119 | -0.126127834 | 0.76880084  | 0.840453363 | PHF21A     |
| ENSG00000266708 | 8.034662387 | 6.582878497 | 0.297296394  | 0.768869139 | 0.840492663 | AP001793.1 |
| ENSG00000260806 | 8.266474095 | 6.604231863 | 0.312487511  | 0.769080654 | 0.840656332 | AL163051.1 |
| ENSG00000268438 | 1.214547612 | 1.753169357 | -0.539421402 | 0.769083575 | 0.840656332 | BNIP3P27   |
| ENSG00000028137 | 1209.443399 | 1397.56377  | -0.208463624 | 0.769222859 | 0.840773206 | TNFRSF1B   |
| ENSG00000240463 | 3.647403784 | 2.904218654 | 0.333280704  | 0.769281737 | 0.840802188 | RPS19P3    |
| ENSG00000268392 | 1.17296339  | 1.823989131 | -0.62193032  | 0.769322048 | 0.840810876 | AC003682.1 |
| ENSG00000144452 | 2.111892509 | 1.518200796 | 0.502835063  | 0.769381544 | 0.840840529 | ABCA12     |
| ENSG00000120265 | 1817.098218 | 1918.612591 | -0.078410332 | 0.769508818 | 0.840917315 | PCMT1      |
| ENSG00000148950 | 76.0185284  | 81.96564604 | -0.110897459 | 0.769536873 | 0.840917315 | IMMP1L     |
| ENSG00000149485 | 1920.692097 | 2088.780179 | -0.120968664 | 0.769560617 | 0.840917315 | FADS1      |
| ENSG00000183055 | 2.682005499 | 3.555933516 | -0.4048637   | 0.769581271 | 0.840917315 | FAM133CP   |
| ENSG00000135617 | 307.8444035 | 325.2055351 | -0.080041701 | 0.769652384 | 0.840959651 | PRADC1     |
| ENSG00000000971 | 3424.227748 | 2485.925797 | 0.461960722  | 0.769853387 | 0.841140511 | CFH        |
| ENSG00000114745 | 932.8927857 | 968.4526909 | -0.05392489  | 0.769882658 | 0.841140511 | GORASP1    |
| ENSG00000221771 | 0.61420451  | 1.110911105 | -0.851832231 | 0.770055684 | 1           | MIR1205    |
| ENSG00000222000 | 0.61420451  | 1.110911105 | -0.851832231 | 0.770055684 | 1           | AC092675.1 |
| ENSG00000005206 | 1193.835169 | 1138.152107 | 0.06911      | 0.770084587 | 0.841311715 | SPPL2B     |
| ENSG00000180720 | 0.923814062 | 1.456837632 | -0.659455797 | 0.770094614 | 1           | CHRM4      |
| ENSG00000229511 | 0.923814062 | 1.456837632 | -0.659455797 | 0.770094614 | 1           | GAS2L1P1   |
| ENSG00000116133 | 957.7322403 | 1086.684533 | -0.182429076 | 0.770104123 | 0.841311715 | DHCR24     |
| ENSG00000226677 | 1.188078446 | 0.743759607 | 0.697792958  | 0.770246496 | 1           | IGBP1P1    |
| ENSG00000073969 | 1.524157165 | 1.029478846 | 0.537988143  | 0.770321085 | 1           | NSF        |
| ENSG00000235852 | 1.524157165 | 1.029478846 | 0.537988143  | 0.770321085 | 1           | AC005540.1 |
| ENSG00000227775 | 6.552089444 | 5.268964682 | 0.310956529  | 0.770406732 | 0.841606917 | AL031282.1 |
| ENSG00000116198 | 739.0824714 | 771.2080174 | -0.061220766 | 0.770615539 | 0.841799627 | CEP104     |
| ENSG00000258984 | 1.186824798 | 0.743759607 | 0.696595374  | 0.770635484 | 1           | UBE2F-SCLY |
| ENSG00000006194 | 578.6081307 | 601.8459229 | -0.057054266 | 0.770701589 | 0.84185823  | ZNF263     |
| ENSG00000236700 | 1.203193503 | 0.672939833 | 0.815069981  | 0.770711716 | 1           | LINC01010  |
| ENSG00000200814 | 1.203193503 | 0.672939833 | 0.815069981  | 0.770711716 | 1           | RNU6-595P  |
| ENSG00000241720 | 1.203193503 | 0.672939833 | 0.815069981  | 0.770711716 | 1           | AL158847.1 |



|                 |             |             |              |             |             |            |
|-----------------|-------------|-------------|--------------|-------------|-------------|------------|
| ENSG00000124635 | 10.3594906  | 8.795372492 | 0.226320748  | 0.770739848 | 0.841864626 | HIST1H2BJ  |
| ENSG00000215210 | 6.942360144 | 5.777755727 | 0.268351807  | 0.770968003 | 0.842078433 | RBMXP2     |
| ENSG00000259654 | 0.616711807 | 1.110911105 | -0.847325894 | 0.771212945 | 1           | AC115102.1 |
| ENSG00000258183 | 0.616711807 | 1.110911105 | -0.847325894 | 0.771212945 | 1           | LINC02392  |
| ENSG00000123612 | 3.045807032 | 2.261960402 | 0.446618659  | 0.771213533 | 0.842296087 | ACVR1C     |
| ENSG00000205644 | 1.218308559 | 1.90542139  | -0.632269878 | 0.771232117 | 0.842296087 | AC025186.1 |
| ENSG00000163449 | 47.75852488 | 53.76285987 | -0.174491316 | 0.771382405 | 0.842424811 | TMEM169    |
| ENSG00000254370 | 2.081662396 | 1.456837632 | 0.525656535  | 0.77149514  | 0.842504137 | AC025871.2 |
| ENSG00000100908 | 12.27105516 | 9.999484217 | 0.296225839  | 0.771519896 | 0.842504137 | EMC9       |
| ENSG00000225300 | 1.214547612 | 0.672939833 | 0.827599603  | 0.771600072 | 1           | AL591623.1 |
| ENSG00000127152 | 49.66808034 | 61.48034895 | -0.306862423 | 0.771697314 | 0.84266246  | BCL11B     |
| ENSG00000224132 | 2.402626059 | 1.823989131 | 0.40973908   | 0.771909303 | 0.84285852  | AC112715.1 |
| ENSG00000241837 | 564.3997538 | 592.3646055 | -0.069682944 | 0.772123269 | 0.84305672  | ATP5PO     |
| ENSG00000269984 | 16.22932215 | 18.30253874 | -0.171171995 | 0.772184595 | 0.843088249 | AC078795.1 |
| ENSG00000277406 | 21.97851798 | 19.53630456 | 0.167937362  | 0.772300455 | 0.843179313 | SEC22B4P   |
| ENSG00000272689 | 1.493927053 | 2.231278821 | -0.565639695 | 0.772352437 | 0.843200633 | AC004832.4 |
| ENSG00000133612 | 1443.858928 | 1519.820922 | -0.073757488 | 0.772406913 | 0.843224674 | AGAP3      |
| ENSG00000280311 | 0.586481695 | 1.060160428 | -0.84667913  | 0.772520791 | 1           | AC131212.4 |
| ENSG00000104313 | 17.79653065 | 22.29315148 | -0.32949728  | 0.772611818 | 0.843412927 | EYA1       |
| ENSG00000173698 | 9.020190323 | 10.8437177  | -0.270090742 | 0.772769338 | 0.843491249 | ADGRG2     |
| ENSG00000271204 | 4.164578442 | 3.230076085 | 0.371154673  | 0.77279841  | 0.843491249 | AC016831.5 |
| ENSG00000268941 | 2.067800989 | 2.873537073 | -0.46659609  | 0.772823847 | 0.843491249 | LINC01711  |
| ENSG00000242262 | 1.541779519 | 2.50754145  | -0.705250486 | 0.772843127 | 0.843491249 | AC092597.1 |
| ENSG00000276931 | 3.044553384 | 2.169915658 | 0.489341238  | 0.772845895 | 0.843491249 | AC009041.4 |
| ENSG00000228782 | 50.14030927 | 55.57366798 | -0.149352717 | 0.772908364 | 0.843523994 | MRPL45P2   |
| ENSG00000068885 | 304.5535363 | 320.2814223 | -0.073315514 | 0.772992995 | 0.843566226 | IFT80      |
| ENSG00000231064 | 34.60306075 | 39.52119289 | -0.190981789 | 0.773011997 | 0.843566226 | AC234582.1 |
| ENSG00000257243 | 1.201939854 | 0.774441189 | 0.672961529  | 0.773078236 | 1           | AC020612.1 |
| ENSG00000259717 | 1.201939854 | 0.774441189 | 0.672961529  | 0.773078236 | 1           | LINC00677  |
| ENSG00000265355 | 0.61420451  | 1.10029862  | -0.84084975  | 0.773109458 | 1           | MIR3136    |
| ENSG00000280277 | 0.61420451  | 1.10029862  | -0.84084975  | 0.773109458 | 1           | AL079342.3 |
| ENSG00000286013 | 0.61420451  | 1.10029862  | -0.84084975  | 0.773109458 | 1           | AC005050.2 |
| ENSG00000186919 | 1.804790254 | 2.466247382 | -0.454772818 | 0.773149839 | 0.843681211 | ZACN       |
| ENSG00000163141 | 15.240318   | 13.30038008 | 0.195376383  | 0.77340749  | 0.843919136 | BNIPL      |
| ENSG00000178458 | 56.9510356  | 53.25954424 | 0.095059273  | 0.773432837 | 0.843919136 | H3F3AP6    |
| ENSG00000115194 | 1.541779519 | 0.774441189 | 1.008129176  | 0.773523753 | 1           | SLC30A3    |
| ENSG00000258488 | 1.541779519 | 0.774441189 | 1.008129176  | 0.773523753 | 1           | AC023310.1 |
| ENSG00000197763 | 184.2406677 | 200.6012475 | -0.12378191  | 0.773530282 | 0.843990015 | TXNRD3     |
| ENSG00000255471 | 26.35094626 | 23.36007158 | 0.174226479  | 0.773666747 | 0.844103462 | AP001528.2 |
| ENSG00000152492 | 1689.51141  | 1776.999806 | -0.072766007 | 0.773980128 | 0.84436467  | CCDC50     |
| ENSG00000230563 | 4.563624682 | 3.566546002 | 0.351634716  | 0.7739963   | 0.84436467  | AL121757.1 |
| ENSG00000274898 | 2.750058887 | 1.834601616 | 0.588820669  | 0.774003656 | 0.84436467  | AC001226.1 |
| novel.416       | 19.38225949 | 22.30923937 | -0.198994394 | 0.774132865 | 0.844455301 | -          |
| novel.280       | 2.14337627  | 3.148643826 | -0.562250204 | 0.77415174  | 0.844455301 | -          |
| ENSG00000101181 | 683.1478502 | 650.9695845 | 0.069231545  | 0.774207804 | 0.844481001 | MTG2       |
| ENSG00000226835 | 0.616711807 | 1.10029862  | -0.836341732 | 0.77426743  | 1           | AC097059.1 |
| ENSG00000286076 | 0.616711807 | 1.10029862  | -0.836341732 | 0.77426743  | 1           | AC005050.3 |
| ENSG00000273232 | 0.616711807 | 1.10029862  | -0.836341732 | 0.77426743  | 1           | AC090912.3 |
| ENSG00000139656 | 0.616711807 | 1.10029862  | -0.836341732 | 0.77426743  | 1           | SMIM2      |
| ENSG00000099330 | 299.0034144 | 277.9449266 | 0.106213007  | 0.774370363 | 0.844622855 | OCEL1      |
| ENSG00000166292 | 30.09308606 | 37.07771153 | -0.303758158 | 0.774580905 | 0.84481703  | TMEM100    |

|                 |             |             |              |             |             |            |
|-----------------|-------------|-------------|--------------|-------------|-------------|------------|
| ENSG00000147100 | 570.180021  | 529.0648181 | 0.108534134  | 0.774721029 | 0.844934391 | SLC16A2    |
| ENSG00000250654 | 21.3029556  | 18.76990732 | 0.188155317  | 0.774864613 | 0.845055514 | AC023794.4 |
| ENSG00000276365 | 3.678887545 | 2.762579107 | 0.394991143  | 0.775073278 | 0.845247601 | MIR145     |
| ENSG00000260793 | 38.64979551 | 41.64022947 | -0.106545003 | 0.775127768 | 0.845271544 | AC003102.1 |
| ENSG00000265399 | 11.48954485 | 9.374983311 | 0.294543057  | 0.775372319 | 0.845488671 | AP005329.2 |
| novel.472       | 256.805998  | 296.4158389 | -0.206520494 | 0.775391962 | 0.845488671 | -          |
| ENSG00000229948 | 2.052685933 | 1.069617038 | 0.941404866  | 0.775449634 | 0.845516071 | B3GALNT1P1 |
| ENSG00000230495 | 0.586481695 | 1.049547942 | -0.835427833 | 0.775648158 | 1           | AL132765.1 |
| ENSG00000241169 | 0.586481695 | 1.049547942 | -0.835427833 | 0.775648158 | 1           | FO393419.2 |
| ENSG00000259904 | 0.586481695 | 1.049547942 | -0.835427833 | 0.775648158 | 1           | ACTG1P15   |
| ENSG00000014123 | 1000.097764 | 964.1327056 | 0.052857868  | 0.775874753 | 0.8459441   | UFL1       |
| ENSG00000270964 | 11.84707814 | 10.19200284 | 0.208035343  | 0.77591962  | 0.845957518 | AC016355.1 |
| ENSG00000031823 | 1443.107279 | 1380.12769  | 0.06444462   | 0.775974779 | 0.845973837 | RANBP3     |
| ENSG00000240395 | 6.082767252 | 5.115428379 | 0.256967432  | 0.776022525 | 0.845973837 | RPL5P23    |
| ENSG00000265241 | 1201.15348  | 1263.551538 | -0.073332965 | 0.776053658 | 0.845973837 | RBM8A      |
| ENSG00000109436 | 786.1555129 | 875.4463003 | -0.155252105 | 0.776082556 | 0.845973837 | TBC1D9     |
| ENSG00000271930 | 1.83125942  | 2.50754145  | -0.45668332  | 0.776097395 | 0.845973837 | AC016877.3 |
| ENSG00000238251 | 2.683259148 | 3.475657132 | -0.379004408 | 0.776295065 | 0.846153804 | AL133477.1 |
| ENSG00000279613 | 1.481319294 | 2.231278821 | -0.576339706 | 0.776413686 | 0.846247598 | AC124283.5 |
| ENSG00000178821 | 10.06743213 | 8.123588533 | 0.304801413  | 0.776738958 | 0.846566611 | TMEM52     |
| ENSG00000287477 | 2.128261214 | 2.873537073 | -0.434595707 | 0.776855346 | 0.846657944 | AL356495.1 |
| ENSG00000257475 | 2.361041837 | 1.426156051 | 0.728299975  | 0.776965236 | 0.846714556 | AC068888.2 |
| ENSG00000204991 | 99.0001254  | 106.0478671 | -0.098926439 | 0.776972469 | 0.846714556 | SPIRE2     |
| ENSG00000256897 | 5.713951124 | 6.797777963 | -0.249034555 | 0.777014879 | 0.846725257 | AC018410.2 |
| ENSG00000095059 | 103.9600046 | 113.0056842 | -0.118156372 | 0.777278612 | 0.846967134 | DHPS       |
| ENSG00000202058 | 5.362757349 | 4.013973884 | 0.423941573  | 0.777302041 | 0.846967134 | RN7SKP80   |
| novel.236       | 0.907445357 | 1.406086955 | -0.63847514  | 0.777325319 | 1           | -          |
| ENSG00000241563 | 2.142122621 | 3.067083173 | -0.505794852 | 0.777376869 | 0.847013145 | CORT       |
| ENSG00000176248 | 1153.755426 | 1096.579675 | 0.073333149  | 0.777638747 | 0.847240421 | ANAPC2     |
| ENSG00000235036 | 5.101000263 | 6.185045417 | -0.269451294 | 0.77765068  | 0.847240421 | AL035456.1 |
| ENSG00000075073 | 16.7618966  | 14.48925581 | 0.211131375  | 0.777771154 | 0.847307447 | TACR2      |
| ENSG00000277806 | 10.94722595 | 9.324104239 | 0.242394019  | 0.777777426 | 0.847307447 | AC006213.4 |
| ENSG00000165660 | 437.3522477 | 457.4234643 | -0.06523056  | 0.777859949 | 0.847340245 | ABRAXAS2   |
| novel.936       | 1.218308559 | 2.0188195   | -0.740230219 | 0.77787276  | 0.847340245 | -          |
| ENSG00000160207 | 9.925128383 | 8.368013705 | 0.237744675  | 0.777970068 | 0.847376964 | HSF2BP     |
| ENSG00000249047 | 1.843867178 | 2.629111901 | -0.504228852 | 0.77798743  | 0.847376964 | COX6B1P5   |
| ENSG00000234937 | 2.654282684 | 1.783850939 | 0.576486817  | 0.778004314 | 0.847376964 | AL139128.1 |
| novel.411       | 54.86239295 | 49.64096329 | 0.145900017  | 0.77805678  | 0.847398583 | -          |
| ENSG00000225978 | 4.001104856 | 5.298490388 | -0.411954796 | 0.778237523 | 0.847559905 | HAR1A      |
| ENSG00000128011 | 52.75267956 | 47.14963812 | 0.164740077  | 0.778321505 | 0.847615837 | LRFN1      |
| ENSG00000133731 | 460.103999  | 432.6485384 | 0.088157175  | 0.778451788 | 0.847722185 | IMPA1      |
| ENSG00000266936 | 0.909952655 | 1.386017859 | -0.619840203 | 0.778562793 | 1           | AC011442.1 |
| ENSG00000136449 | 26.85049856 | 23.48421057 | 0.189091987  | 0.778562797 | 0.847807537 | MYCBPAP    |
| ENSG00000213903 | 5.838632519 | 4.606637334 | 0.334489035  | 0.7786131   | 0.847826779 | LTB4R      |
| ENSG00000249839 | 9.89489827  | 11.56740821 | -0.229424335 | 0.778789267 | 0.847983067 | AC011330.1 |
| ENSG00000164117 | 425.3334183 | 403.6497696 | 0.076070458  | 0.778969383 | 0.84814364  | FBXO8      |
| ENSG00000170486 | 0.307102255 | 0.713078025 | -1.133276919 | 0.779019541 | 1           | KRT72      |
| ENSG00000231458 | 0.307102255 | 0.713078025 | -1.133276919 | 0.779019541 | 1           | RNASEH1P2  |
| ENSG00000286189 | 0.307102255 | 0.713078025 | -1.133276919 | 0.779019541 | 1           | AC108021.1 |
| ENSG00000261649 | 0.307102255 | 0.713078025 | -1.133276919 | 0.779019541 | 1           | GOLGA6L7   |
| ENSG00000266495 | 0.307102255 | 0.713078025 | -1.133276919 | 0.779019541 | 1           | AC011731.1 |

|                 |             |             |              |             |   |               |
|-----------------|-------------|-------------|--------------|-------------|---|---------------|
| ENSG00000200683 | 0.307102255 | 0.713078025 | -1.133276919 | 0.779019541 | 1 | RNU6-379P     |
| ENSG00000238207 | 0.307102255 | 0.713078025 | -1.133276919 | 0.779019541 | 1 | AC009312.1    |
| ENSG00000254132 | 0.307102255 | 0.713078025 | -1.133276919 | 0.779019541 | 1 | MTND6P3       |
| ENSG00000279114 | 0.307102255 | 0.713078025 | -1.133276919 | 0.779019541 | 1 | Z99129.3      |
| ENSG00000276822 | 0.307102255 | 0.713078025 | -1.133276919 | 0.779019541 | 1 | AC009053.4    |
| ENSG00000267557 | 0.307102255 | 0.713078025 | -1.133276919 | 0.779019541 | 1 | AC008474.1    |
| ENSG00000267943 | 0.307102255 | 0.713078025 | -1.133276919 | 0.779019541 | 1 | AC010328.1    |
| ENSG00000235808 | 0.307102255 | 0.713078025 | -1.133276919 | 0.779019541 | 1 | MYL6P2        |
| ENSG00000279591 | 0.293240848 | 0.713078025 | -1.133276919 | 0.779019541 | 1 | AC002044.2    |
| ENSG00000128276 | 0.308355904 | 0.713078025 | -1.133276919 | 0.779019541 | 1 | RFPL3         |
| ENSG00000228679 | 0.293240848 | 0.713078025 | -1.133276919 | 0.779019541 | 1 | AL034347.1    |
| ENSG00000205584 | 0.293240848 | 0.713078025 | -1.133276919 | 0.779019541 | 1 | AC211476.1    |
| ENSG00000267373 | 0.308355904 | 0.713078025 | -1.133276919 | 0.779019541 | 1 | AC008894.1    |
| ENSG00000286951 | 0.293240848 | 0.713078025 | -1.133276919 | 0.779019541 | 1 | AL356113.1    |
| ENSG00000235635 | 0.293240848 | 0.713078025 | -1.133276919 | 0.779019541 | 1 | AC016644.1    |
| ENSG00000254898 | 0.293240848 | 0.713078025 | -1.133276919 | 0.779019541 | 1 | AC087362.1    |
| ENSG00000264947 | 0.308355904 | 0.713078025 | -1.133276919 | 0.779019541 | 1 | MIR3181       |
| ENSG00000277634 | 0.293240848 | 0.713078025 | -1.133276919 | 0.779019541 | 1 | RF00019       |
| ENSG00000241431 | 0.293240848 | 0.713078025 | -1.133276919 | 0.779019541 | 1 | RPL37P6       |
| ENSG00000224972 | 0.293240848 | 0.713078025 | -1.133276919 | 0.779019541 | 1 | AL513412.1    |
| ENSG00000258355 | 0.308355904 | 0.713078025 | -1.133276919 | 0.779019541 | 1 | AC079174.1    |
| ENSG00000232136 | 0.308355904 | 0.713078025 | -1.133276919 | 0.779019541 | 1 | DUXAP7        |
| ENSG00000243749 | 0.308355904 | 0.713078025 | -1.133276919 | 0.779019541 | 1 | TMEM35B       |
| ENSG00000256499 | 0.293240848 | 0.713078025 | -1.133276919 | 0.779019541 | 1 | LINC02468     |
| ENSG00000259054 | 0.308355904 | 0.713078025 | -1.133276919 | 0.779019541 | 1 | LINC02332     |
| ENSG00000259617 | 0.293240848 | 0.713078025 | -1.133276919 | 0.779019541 | 1 | AC020661.3    |
| ENSG00000260156 | 0.293240848 | 0.713078025 | -1.133276919 | 0.779019541 | 1 | AC020763.1    |
| ENSG00000279361 | 0.293240848 | 0.713078025 | -1.133276919 | 0.779019541 | 1 | AC079331.1    |
| ENSG00000236090 | 0.308355904 | 0.713078025 | -1.133276919 | 0.779019541 | 1 | LDHAP3        |
| ENSG00000271070 | 0.293240848 | 0.713078025 | -1.133276919 | 0.779019541 | 1 | GMCL1P2       |
| ENSG00000238008 | 0.293240848 | 0.713078025 | -1.133276919 | 0.779019541 | 1 | COX6CP10      |
| ENSG00000261758 | 0.293240848 | 0.713078025 | -1.133276919 | 0.779019541 | 1 | AC117382.2    |
| ENSG00000251111 | 0.293240848 | 0.713078025 | -1.133276919 | 0.779019541 | 1 | FCF1P8        |
| ENSG00000273294 | 0.293240848 | 0.713078025 | -1.133276919 | 0.779019541 | 1 | C1QTNF3-AMACR |
| ENSG00000224707 | 0.293240848 | 0.713078025 | -1.133276919 | 0.779019541 | 1 | E2F3-IT1      |
| ENSG00000236324 | 0.293240848 | 0.713078025 | -1.133276919 | 0.779019541 | 1 | AL035634.1    |
| ENSG00000221510 | 0.308355904 | 0.713078025 | -1.133276919 | 0.779019541 | 1 | MIR548O       |
| ENSG00000165120 | 0.308355904 | 0.713078025 | -1.133276919 | 0.779019541 | 1 | SSMEM1        |
| ENSG00000260253 | 0.308355904 | 0.713078025 | -1.133276919 | 0.779019541 | 1 | AC084262.1    |
| ENSG00000207955 | 0.293240848 | 0.713078025 | -1.133276919 | 0.779019541 | 1 | AL359091.1    |
| ENSG00000184933 | 0.308355904 | 0.713078025 | -1.133276919 | 0.779019541 | 1 | OR6A2         |
| ENSG00000186082 | 0.308355904 | 0.713078025 | -1.133276919 | 0.779019541 | 1 | KRT18P14      |
| ENSG00000252827 | 0.293240848 | 0.713078025 | -1.133276919 | 0.779019541 | 1 | RN7SKP11      |
| ENSG00000287376 | 0.293240848 | 0.713078025 | -1.133276919 | 0.779019541 | 1 | AL359538.3    |
| ENSG00000201557 | 0.308355904 | 0.713078025 | -1.133276919 | 0.779019541 | 1 | SNORD114-15   |
| ENSG00000204913 | 0.308355904 | 0.713078025 | -1.133276919 | 0.779019541 | 1 | LRRRC3C       |
| ENSG00000199490 | 0.308355904 | 0.713078025 | -1.133276919 | 0.779019541 | 1 | RF00019       |
| ENSG00000279177 | 0.308355904 | 0.713078025 | -1.133276919 | 0.779019541 | 1 | FP236241.2    |
| ENSG00000234030 | 0.293240848 | 0.713078025 | -1.133276919 | 0.779019541 | 1 | TMEM97P1      |
| ENSG00000267808 | 0.908699006 | 1.426156051 | -0.653076822 | 0.779149417 | 1 | AC018755.1    |
| ENSG00000225179 | 1.188078446 | 0.672939833 | 0.800222814  | 0.779247861 | 1 | LINC00457     |

|                 |             |             |              |             |             |            |
|-----------------|-------------|-------------|--------------|-------------|-------------|------------|
| ENSG00000227006 | 7.431811987 | 6.05286248  | 0.297490046  | 0.779262058 | 0.84842675  | AL136988.2 |
| ENSG00000196588 | 607.0231448 | 582.5210502 | 0.059087176  | 0.779337666 | 0.848451049 | MRTFA      |
| ENSG00000232046 | 1.536764924 | 2.140389951 | -0.485587082 | 0.77934969  | 0.848451049 | LINC01798  |
| ENSG00000141084 | 508.4373392 | 478.5867446 | 0.087435334  | 0.77949991  | 0.848579031 | RANBP10    |
| ENSG00000039987 | 1.541779519 | 2.52645467  | -0.715268157 | 0.779533387 | 0.848579919 | BEST2      |
| ENSG00000280474 | 1.81990531  | 2.486316478 | -0.454648093 | 0.779721101 | 0.848748698 | AL356481.2 |
| ENSG00000249996 | 1.233423615 | 0.693008929 | 0.815939211  | 0.779780485 | 1           | AC106786.2 |
| ENSG00000273118 | 1.233423615 | 0.693008929 | 0.815939211  | 0.779780485 | 1           | AC093865.1 |
| ENSG00000199237 | 1.233423615 | 0.693008929 | 0.815939211  | 0.779780485 | 1           | RNU6-834P  |
| ENSG00000237136 | 1.233423615 | 0.693008929 | 0.815939211  | 0.779780485 | 1           | C4orf51    |
| ENSG00000279512 | 0.600343103 | 1.069617038 | -0.832638522 | 0.779863974 | 1           | AC011755.1 |
| ENSG00000271945 | 0.600343103 | 1.069617038 | -0.832638522 | 0.779863974 | 1           | AL355612.1 |
| ENSG00000168014 | 479.0302991 | 504.0735109 | -0.074001856 | 0.779960189 | 0.848973382 | C2CD3      |
| ENSG00000140395 | 809.4943925 | 850.7246383 | -0.071995237 | 0.780027227 | 0.84900199  | WDR61      |
| ENSG00000269959 | 5.775664997 | 6.980839971 | -0.283329585 | 0.780051826 | 0.84900199  | SPACA6P-AS |
| novel.360       | 3.29495636  | 4.565214872 | -0.457842654 | 0.780208802 | 0.849137269 | -          |
| ENSG00000146083 | 802.5353629 | 742.886542  | 0.111704939  | 0.780280262 | 0.849166053 | RNF44      |
| ENSG00000199466 | 2.460578986 | 1.548882377 | 0.682891213  | 0.78031375  | 0.849166053 | RF00019    |
| ENSG00000257595 | 1.218308559 | 1.834601616 | -0.586145456 | 0.780344407 | 0.849166053 | LINC02356  |
| ENSG00000249673 | 247.5040037 | 233.0188741 | 0.085985694  | 0.780365986 | 0.849166053 | NOP14-AS1  |
| ENSG00000255438 | 0.601596751 | 1.069617038 | -0.830336241 | 0.780442693 | 1           | AL354813.1 |
| ENSG00000257954 | 0.601596751 | 1.069617038 | -0.830336241 | 0.780442693 | 1           | AC125611.2 |
| ENSG00000163818 | 285.3279401 | 303.221674  | -0.087235293 | 0.780637902 | 0.849426366 | LZTFL1     |
| ENSG00000262810 | 1.524157165 | 1.060160428 | 0.513086031  | 0.780682981 | 1           | AC090617.4 |
| ENSG00000077463 | 443.1359758 | 464.1368907 | -0.066141734 | 0.781009771 | 0.849795413 | AC016586.1 |
| ENSG00000175414 | 660.1262794 | 698.4843879 | -0.081211418 | 0.781109293 | 0.849868108 | ARL10      |
| ENSG00000242615 | 15.6415868  | 13.76916132 | 0.179817357  | 0.781205748 | 0.849902052 | AC022415.1 |
| ENSG00000266957 | 1.521649867 | 2.10970837  | -0.480618746 | 0.781211763 | 0.849902052 | AC012254.1 |
| ENSG00000172687 | 167.1313535 | 180.9304483 | -0.114958682 | 0.781238629 | 0.849902052 | ZNF738     |
| ENSG00000272948 | 7.291046621 | 6.04340587  | 0.26620784   | 0.781292983 | 0.849925595 | AP001412.1 |
| ENSG00000213741 | 4138.726352 | 4422.210445 | -0.095580685 | 0.781651955 | 0.850236277 | RPS29      |
| ENSG00000158604 | 1814.756625 | 1733.921361 | 0.065921079  | 0.781673804 | 0.850236277 | TMED4      |
| ENSG00000274213 | 3.948166524 | 5.115428379 | -0.370209658 | 0.781676753 | 0.850236277 | AC015912.3 |
| ENSG00000253688 | 3.050821627 | 3.832196145 | -0.34308621  | 0.781744969 | 0.85027488  | AC026904.2 |
| ENSG00000230534 | 1.188078446 | 1.783850939 | -0.581274682 | 0.781855907 | 0.850359943 | AL392046.1 |
| ENSG00000243018 | 2.080408748 | 1.396630344 | 0.569719022  | 0.782003713 | 0.850435193 | AC005486.1 |
| ENSG00000273188 | 17.29175028 | 19.35195829 | -0.157023029 | 0.782006455 | 0.850435193 | AL022328.3 |
| ENSG00000238231 | 0.586481695 | 1.029478846 | -0.812375479 | 0.782008891 | 1           | AL512288.2 |
| ENSG00000280836 | 0.586481695 | 1.029478846 | -0.812375479 | 0.782008891 | 1           | AL355480.1 |
| ENSG00000225805 | 0.586481695 | 1.029478846 | -0.812375479 | 0.782008891 | 1           | DEFB131B   |
| ENSG00000232936 | 0.586481695 | 1.029478846 | -0.812375479 | 0.782008891 | 1           | AL157400.2 |
| ENSG00000206954 | 0.586481695 | 1.029478846 | -0.812375479 | 0.782008891 | 1           | RNU6-1201P |
| ENSG00000233635 | 0.586481695 | 1.029478846 | -0.812375479 | 0.782008891 | 1           | AC015923.1 |
| ENSG00000129048 | 8.682857955 | 7.245205845 | 0.266551745  | 0.782023294 | 0.850435193 | ACKR4      |
| ENSG00000215131 | 1.525410814 | 1.049547942 | 0.522492847  | 0.782319249 | 1           | C16orf90   |
| ENSG00000220412 | 0.879722543 | 1.487519214 | -0.74170546  | 0.78232927  | 1           | AL356234.1 |
| ENSG00000240132 | 2.639167628 | 1.753169357 | 0.589139033  | 0.782468735 | 0.850883986 | ETF1P2     |
| ENSG00000188505 | 2.158491326 | 1.161661783 | 0.905095561  | 0.782633219 | 0.851001618 | NCCRP1     |
| ENSG00000144535 | 454.4574754 | 428.3938512 | 0.08572131   | 0.782642418 | 0.851001618 | DIS3L2     |
| ENSG00000170417 | 42.88898032 | 48.08776138 | -0.169157093 | 0.782729368 | 0.851060545 | TMEM182    |
| ENSG00000259790 | 1.526664462 | 2.10970837  | -0.477170129 | 0.78279292  | 0.851094026 | ANP32BP1   |

|                 |             |             |              |             |             |            |
|-----------------|-------------|-------------|--------------|-------------|-------------|------------|
| ENSG00000185753 | 535.3428833 | 509.9587445 | 0.070639289  | 0.782867851 | 0.851139877 | CXorf38    |
| ENSG00000177971 | 532.2358884 | 504.7878395 | 0.0760177    | 0.783007115 | 0.851255664 | IMP3       |
| ENSG00000271992 | 3.65116473  | 2.893606169 | 0.337006572  | 0.783046236 | 0.851262574 | AL354872.2 |
| ENSG00000212536 | 1.232169966 | 0.713078025 | 0.782558359  | 0.783138487 | 1           | RNA5SP474  |
| ENSG00000256053 | 286.9427883 | 301.8078942 | -0.072918721 | 0.783271539 | 0.851471877 | APOPT1     |
| ENSG00000141837 | 409.2912594 | 355.2686989 | 0.204516932  | 0.783423229 | 0.85152487  | CACNA1A    |
| ENSG00000135956 | 1404.714307 | 1344.489011 | 0.063158307  | 0.78342537  | 0.85152487  | TMEM127    |
| ENSG00000198088 | 5.834871573 | 4.546430046 | 0.350030532  | 0.783440594 | 0.85152487  | NUP62CL    |
| ENSG00000213860 | 114.1759653 | 126.3876721 | -0.146641743 | 0.783460467 | 0.85152487  | RPL21P75   |
| ENSG00000140807 | 115.2954487 | 142.941605  | -0.309697714 | 0.783484162 | 0.85152487  | NKD1       |
| ENSG00000240225 | 178.1461187 | 191.8319331 | -0.108056164 | 0.783598371 | 0.851613372 | ZNF542P    |
| ENSG00000203879 | 4869.558841 | 4653.678593 | 0.065483522  | 0.783683581 | 0.851651321 | GDI1       |
| ENSG00000284948 | 4.931187162 | 3.638521651 | 0.439290591  | 0.783720281 | 0.851651321 | AC107959.4 |
| novel.539       | 131.5122069 | 120.4711022 | 0.12606286   | 0.783768466 | 0.851651321 | -          |
| ENSG00000234818 | 1.773306493 | 1.069617038 | 0.730478029  | 0.783797188 | 0.851651321 | AC007314.1 |
| ENSG00000254034 | 1.773306493 | 1.069617038 | 0.730478029  | 0.783797188 | 0.851651321 | INTS9-AS1  |
| ENSG00000224647 | 0.879722543 | 1.4981317   | -0.750838399 | 0.783852818 | 1           | AC026954.1 |
| ENSG00000272660 | 2.722336072 | 1.885352294 | 0.544277088  | 0.783926478 | 0.851756182 | AC090425.1 |
| ENSG00000285870 | 1.7871679   | 2.587817834 | -0.522924904 | 0.78412535  | 0.851936633 | AC012673.1 |
| ENSG00000272498 | 0.923814062 | 1.386017859 | -0.603847147 | 0.784172292 | 1           | AC090948.2 |
| ENSG00000107672 | 621.2631202 | 653.4534268 | -0.0732102   | 0.784353393 | 0.852148763 | NSMCE4A    |
| ENSG00000235655 | 589.768535  | 549.3089952 | 0.102792902  | 0.784481366 | 0.852231322 | H3F3AP4    |
| ENSG00000276292 | 1.84261353  | 1.110911105 | 0.736386976  | 0.784494989 | 0.852231322 | AC131159.1 |
| ENSG00000102901 | 1068.419093 | 1016.771534 | 0.07157482   | 0.784657561 | 0.852346326 | CENPT      |
| ENSG00000259347 | 2.155984028 | 3.068367442 | -0.523118599 | 0.784666465 | 0.852346326 | AC087482.1 |
| novel.299       | 2.082916045 | 3.005720009 | -0.515666127 | 0.784708479 | 0.852356328 | -          |
| ENSG00000167716 | 170.8373788 | 157.2385175 | 0.12057592   | 0.784952153 | 0.852585363 | WDR81      |
| ENSG00000103502 | 1744.349517 | 1669.66033  | 0.063116858  | 0.785167759 | 0.852783894 | CDIPT      |
| ENSG00000102921 | 837.9329565 | 803.9700163 | 0.060046547  | 0.785226011 | 0.852789428 | AC026470.1 |
| novel.418       | 2.712235611 | 2.10970837  | 0.35267562   | 0.785238501 | 0.852789428 | -          |
| ENSG00000276692 | 3.839853833 | 2.884149558 | 0.419476481  | 0.785537219 | 0.853078184 | CR769767.2 |
| ENSG00000258633 | 0.61420451  | 1.060160428 | -0.795694608 | 0.785581507 | 1           | AL049870.2 |
| ENSG00000287534 | 2.435363469 | 1.783850939 | 0.445460367  | 0.785638684 | 0.853152712 | AC110792.4 |
| ENSG00000126247 | 6962.900799 | 6635.750695 | 0.069430632  | 0.785685468 | 0.853167857 | CAPNS1     |
| ENSG00000176108 | 322.2733096 | 341.6513142 | -0.085019123 | 0.785747364 | 0.85319941  | CHMP6      |
| ENSG00000116791 | 653.8618026 | 619.6467558 | 0.078022981  | 0.785866351 | 0.853292948 | CRYZ       |
| ENSG00000231050 | 6.365907639 | 7.552150055 | -0.246072137 | 0.785899767 | 0.85329357  | AL109917.1 |
| ENSG00000181218 | 3.296210009 | 2.598430319 | 0.361645739  | 0.786008965 | 0.853376469 | HIST3H2A   |
| ENSG00000258904 | 4.848089989 | 5.900482053 | -0.273682006 | 0.786157899 | 0.853502502 | AL157871.5 |
| ENSG00000162526 | 8.092615314 | 9.467028055 | -0.217707379 | 0.786751638 | 0.854086419 | TSSK3      |
| ENSG00000258450 | 2.770188538 | 3.668047357 | -0.404101092 | 0.78676149  | 0.854086419 | AL139099.2 |
| ENSG00000167476 | 9.159986774 | 7.04335901  | 0.375317364  | 0.786808167 | 0.854101403 | JSRP1      |
| ENSG00000111837 | 16.42051855 | 19.01548837 | -0.205280639 | 0.78690694  | 0.854172935 | MAK        |
| ENSG00000279758 | 3.608326859 | 2.762579107 | 0.372177783  | 0.787022185 | 0.854262341 | AC105339.5 |
| ENSG00000223475 | 1.218308559 | 0.713078025 | 0.768389573  | 0.787105849 | 1           | AC099681.1 |
| ENSG00000225913 | 5.088392504 | 6.330280984 | -0.316987294 | 0.78710971  | 0.854321652 | AL138767.3 |
| ENSG00000260898 | 3.988497097 | 5.187532422 | -0.389768869 | 0.787170406 | 0.854351838 | ADPGK-AS1  |
| ENSG00000188786 | 410.5814844 | 427.4286421 | -0.057521032 | 0.787221196 | 0.854371273 | MTF1       |
| ENSG00000255133 | 2.158491326 | 3.362259022 | -0.637504107 | 0.787323246 | 0.854446334 | AC113192.2 |
| ENSG00000241738 | 1.203193503 | 0.713078025 | 0.752774581  | 0.787426854 | 1           | ZNF90P1    |
| ENSG00000287654 | 1.203193503 | 0.713078025 | 0.752774581  | 0.787426854 | 1           | AP002982.2 |

|                 |             |             |              |             |             |             |
|-----------------|-------------|-------------|--------------|-------------|-------------|-------------|
| ENSG00000201839 | 1.203193503 | 0.713078025 | 0.752774581  | 0.787426854 | 1           | SNORD114-3  |
| ENSG00000167046 | 1.203193503 | 0.713078025 | 0.752774581  | 0.787426854 | 1           | AL357033.1  |
| ENSG00000139194 | 26.79039435 | 29.57117508 | -0.142682409 | 0.787809598 | 0.854938439 | RBP5        |
| ENSG00000213492 | 10.78722857 | 9.376139186 | 0.207222081  | 0.787890872 | 0.854990926 | NT5C3AP1    |
| ENSG00000254750 | 1.846374476 | 1.161661783 | 0.686795458  | 0.788097968 | 0.855144577 | CASP1P2     |
| ENSG00000127554 | 303.9447736 | 317.9237403 | -0.064561469 | 0.788124587 | 0.855144577 | GFER        |
| ENSG00000285859 | 3.969621095 | 3.169868797 | 0.312703908  | 0.788136063 | 0.855144577 | AL512598.2  |
| ENSG00000279841 | 1.200686205 | 0.713078025 | 0.750215867  | 0.788156311 | 1           | AC092135.3  |
| ENSG00000255236 | 2.402626059 | 1.783850939 | 0.429958394  | 0.788164121 | 0.855144577 | AP002992.1  |
| ENSG00000200914 | 1.214547612 | 0.713078025 | 0.764553429  | 0.788180878 | 1           | RNA5SP435   |
| ENSG00000201899 | 1.214547612 | 0.713078025 | 0.764553429  | 0.788180878 | 1           | SNORD114-24 |
| ENSG00000168243 | 6.150749369 | 4.494523493 | 0.444239192  | 0.78827938  | 0.855214689 | GNG4        |
| ENSG00000101190 | 427.9371281 | 446.2638938 | -0.060424274 | 0.788294576 | 0.855214689 | TCFL5       |
| ENSG00000234630 | 5.517740128 | 6.807234573 | -0.306562887 | 0.788580906 | 0.855489603 | AC245060.2  |
| ENSG00000214558 | 2.40137241  | 1.773238453 | 0.434747957  | 0.788660886 | 0.855540646 | AL365217.1  |
| ENSG00000112297 | 263.5962783 | 245.5181938 | 0.101414916  | 0.789085706 | 0.855965752 | CRYBG1      |
| ENSG00000136883 | 1.850135422 | 1.130980201 | 0.719863627  | 0.789158215 | 0.856008667 | KIF12       |
| ENSG00000285651 | 3.62978143  | 4.646775526 | -0.357287743 | 0.789289703 | 0.856089321 | AL450992.2  |
| ENSG00000235272 | 5.747942182 | 6.716345703 | -0.230865968 | 0.789331047 | 0.856089321 | RAMACL      |
| ENSG00000189227 | 108.3683184 | 101.6918195 | 0.089621034  | 0.789331422 | 0.856089321 | C15orf61    |
| ENSG00000199407 | 1.466204238 | 0.774441189 | 0.940632026  | 0.789373152 | 1           | RNA5SP301   |
| ENSG00000285600 | 1.466204238 | 0.774441189 | 0.940632026  | 0.789373152 | 1           | AC023593.1  |
| ENSG00000263011 | 2.431602522 | 1.834601616 | 0.415829654  | 0.789534078 | 0.85626643  | AC108134.4  |
| ENSG00000047662 | 15.74997077 | 14.13387268 | 0.160009561  | 0.789560636 | 0.85626643  | FAM184B     |
| ENSG00000164663 | 178.5218598 | 191.312564  | -0.098640455 | 0.789715303 | 0.856398418 | USP49       |
| ENSG00000213939 | 2.158491326 | 1.436768536 | 0.583926568  | 0.78979431  | 0.856429084 | AC091153.1  |
| ENSG00000266538 | 2.40137241  | 3.199394504 | -0.414390306 | 0.789826036 | 0.856429084 | AC005838.2  |
| ENSG00000223878 | 8.456416847 | 6.816562789 | 0.322676379  | 0.789842472 | 0.856429084 | PPIAP53     |
| ENSG00000236779 | 0.616711807 | 1.049547942 | -0.779908251 | 0.789877806 | 1           | AL512306.1  |
| ENSG00000003509 | 352.0645653 | 368.785498  | -0.066295904 | 0.790086452 | 0.856635981 | NDUFAF7     |
| ENSG00000170091 | 1.845120827 | 1.161661783 | 0.685643006  | 0.790099227 | 0.856635981 | NSG2        |
| ENSG00000228436 | 25.58057659 | 23.155913   | 0.142913332  | 0.790167051 | 0.856673767 | AL139260.1  |
| ENSG00000226520 | 2.406387005 | 3.159256312 | -0.397649527 | 0.790453377 | 0.856948432 | KIRREL1-IT1 |
| ENSG00000278594 | 8.615160573 | 6.828459544 | 0.333527975  | 0.790840847 | 0.857294867 | AL589182.2  |
| ENSG00000076924 | 1129.487523 | 1174.199325 | -0.055923267 | 0.790861016 | 0.857294867 | XAB2        |
| ENSG00000213590 | 3.65116473  | 2.954969332 | 0.317315218  | 0.79087192  | 0.857294867 | AL807752.1  |
| ENSG00000237989 | 4.499403511 | 5.411760104 | -0.260131552 | 0.790909294 | 0.857299611 | LINC01679   |
| ENSG00000168118 | 724.4209982 | 694.6291817 | 0.060530936  | 0.790960032 | 0.85731884  | RAB4A       |
| ENSG00000228663 | 3.340301529 | 2.52645467  | 0.403477146  | 0.79102496  | 0.857353447 | PSMD10P1    |
| ENSG00000099860 | 1650.567187 | 1491.633238 | 0.14600796   | 0.791099847 | 0.857398846 | GADD45B     |
| ENSG00000280417 | 4.616563014 | 3.02822925  | 0.598150293  | 0.791142492 | 0.857409297 | AC096887.2  |
| ENSG00000288031 | 1.203193503 | 1.742556871 | -0.541422386 | 0.791203778 | 0.85743995  | AC093838.2  |
| ENSG00000188295 | 83.04495463 | 88.49396824 | -0.092338599 | 0.791287675 | 0.857495102 | ZNF669      |
| ENSG00000236017 | 134.7061587 | 127.4255329 | 0.0820268    | 0.791474198 | 0.857661459 | ASMTL-AS1   |
| ENSG00000231107 | 2.128261214 | 3.048298346 | -0.529681129 | 0.791594282 | 0.857755809 | LINC01508   |
| ENSG00000099866 | 15.83439286 | 14.05359629 | 0.172034095  | 0.791884818 | 0.858034843 | MADCAM1     |
| ENSG00000254936 | 2.391271949 | 1.548882377 | 0.645332353  | 0.792137099 | 0.858272404 | AF131215.4  |
| ENSG00000262583 | 5.735334424 | 7.246490114 | -0.343972114 | 0.792500843 | 0.858630709 | TMEM231P1   |
| ENSG00000163626 | 410.7741479 | 432.4394183 | -0.074824477 | 0.792618643 | 0.858722529 | COX18       |
| ENSG00000180878 | 1.817398012 | 2.395427609 | -0.416142821 | 0.792797534 | 0.858880524 | C11orf42    |
| ENSG00000286118 | 1.200686205 | 1.762625967 | -0.556616196 | 0.793066141 | 0.859135697 | AC234031.1  |

|                 |             |             |              |             |             |            |
|-----------------|-------------|-------------|--------------|-------------|-------------|------------|
| ENSG00000285122 | 0.293240848 | 0.672939833 | -1.060865162 | 0.793140732 | 1           | PIGY-DT    |
| ENSG00000253641 | 0.293240848 | 0.672939833 | -1.060865162 | 0.793140732 | 1           | AC104964.1 |
| ENSG00000232519 | 0.307102255 | 0.672939833 | -1.060865162 | 0.793140732 | 1           | AL353807.2 |
| ENSG00000252821 | 0.307102255 | 0.672939833 | -1.060865162 | 0.793140732 | 1           | RNU6-388P  |
| ENSG00000286259 | 0.307102255 | 0.672939833 | -1.060865162 | 0.793140732 | 1           | AC078820.2 |
| ENSG00000283324 | 0.307102255 | 0.672939833 | -1.060865162 | 0.793140732 | 1           | CTXND2     |
| ENSG00000244674 | 0.293240848 | 0.672939833 | -1.060865162 | 0.793140732 | 1           | RPS3AP15   |
| ENSG00000232139 | 0.293240848 | 0.672939833 | -1.060865162 | 0.793140732 | 1           | LINC00867  |
| ENSG00000226251 | 0.293240848 | 0.672939833 | -1.060865162 | 0.793140732 | 1           | LINC02608  |
| ENSG00000240002 | 0.307102255 | 0.672939833 | -1.060865162 | 0.793140732 | 1           | YBX1P3     |
| ENSG00000225606 | 0.307102255 | 0.672939833 | -1.060865162 | 0.793140732 | 1           | AC005281.1 |
| ENSG00000270983 | 0.293240848 | 0.672939833 | -1.060865162 | 0.793140732 | 1           | AL589674.1 |
| ENSG00000260803 | 0.307102255 | 0.672939833 | -1.060865162 | 0.793140732 | 1           | Z84723.1   |
| ENSG00000268663 | 0.293240848 | 0.672939833 | -1.060865162 | 0.793140732 | 1           | AC020910.1 |
| ENSG00000271034 | 0.307102255 | 0.672939833 | -1.060865162 | 0.793140732 | 1           | AC139700.1 |
| ENSG00000204220 | 0.307102255 | 0.672939833 | -1.060865162 | 0.793140732 | 1           | PFDN6      |
| ENSG00000146242 | 0.293240848 | 0.672939833 | -1.060865162 | 0.793140732 | 1           | TPBG       |
| ENSG00000232335 | 0.307102255 | 0.672939833 | -1.060865162 | 0.793140732 | 1           | AL354864.1 |
| ENSG00000238171 | 0.307102255 | 0.672939833 | -1.060865162 | 0.793140732 | 1           | AC068196.1 |
| ENSG00000185038 | 0.307102255 | 0.672939833 | -1.060865162 | 0.793140732 | 1           | MROH2A     |
| ENSG00000200455 | 0.293240848 | 0.672939833 | -1.060865162 | 0.793140732 | 1           | RNU6-1112P |
| ENSG00000240785 | 0.307102255 | 0.672939833 | -1.060865162 | 0.793140732 | 1           | RPL36AP21  |
| ENSG00000196468 | 0.307102255 | 0.672939833 | -1.060865162 | 0.793140732 | 1           | FGF16      |
| ENSG00000199132 | 0.307102255 | 0.672939833 | -1.060865162 | 0.793140732 | 1           | MIR450A1   |
| ENSG00000205293 | 0.307102255 | 0.672939833 | -1.060865162 | 0.793140732 | 1           | LINC01602  |
| ENSG00000242170 | 0.293240848 | 0.672939833 | -1.060865162 | 0.793140732 | 1           | RN7SL329P  |
| ENSG00000252992 | 0.307102255 | 0.672939833 | -1.060865162 | 0.793140732 | 1           | RF00564    |
| ENSG00000215760 | 0.293240848 | 0.672939833 | -1.060865162 | 0.793140732 | 1           | TAF9BP2    |
| ENSG00000207142 | 0.293240848 | 0.672939833 | -1.060865162 | 0.793140732 | 1           | RF00019    |
| ENSG00000258033 | 0.293240848 | 0.672939833 | -1.060865162 | 0.793140732 | 1           | AC063947.2 |
| ENSG00000259645 | 0.307102255 | 0.672939833 | -1.060865162 | 0.793140732 | 1           | AC027237.5 |
| ENSG00000265400 | 0.293240848 | 0.672939833 | -1.060865162 | 0.793140732 | 1           | AC005244.2 |
| ENSG00000104921 | 0.308355904 | 0.672939833 | -1.060865162 | 0.793140732 | 1           | FCER2      |
| ENSG00000249923 | 0.308355904 | 0.672939833 | -1.060865162 | 0.793140732 | 1           | AC007663.2 |
| ENSG00000230452 | 0.308355904 | 0.672939833 | -1.060865162 | 0.793140732 | 1           | LINC01381  |
| ENSG00000156076 | 0.308355904 | 0.672939833 | -1.060865162 | 0.793140732 | 1           | WIF1       |
| ENSG00000272372 | 0.308355904 | 0.672939833 | -1.060865162 | 0.793140732 | 1           | AC009102.2 |
| ENSG00000231133 | 0.308355904 | 0.672939833 | -1.060865162 | 0.793140732 | 1           | HAR1B      |
| ENSG00000260678 | 0.308355904 | 0.672939833 | -1.060865162 | 0.793140732 | 1           | AC093249.3 |
| ENSG00000275881 | 0.308355904 | 0.672939833 | -1.060865162 | 0.793140732 | 1           | RF00017    |
| ENSG00000261612 | 0.308355904 | 0.672939833 | -1.060865162 | 0.793140732 | 1           | SUB1P3     |
| ENSG00000232333 | 0.308355904 | 0.672939833 | -1.060865162 | 0.793140732 | 1           | RPS27AP2   |
| ENSG00000286732 | 0.308355904 | 0.672939833 | -1.060865162 | 0.793140732 | 1           | AC091181.2 |
| ENSG00000184774 | 0.308355904 | 0.672939833 | -1.060865162 | 0.793140732 | 1           | MGAT4EP    |
| ENSG00000253282 | 0.308355904 | 0.672939833 | -1.060865162 | 0.793140732 | 1           | AP001330.1 |
| ENSG00000200304 | 0.308355904 | 0.672939833 | -1.060865162 | 0.793140732 | 1           | RNU6-1255P |
| ENSG00000286544 | 0.308355904 | 0.672939833 | -1.060865162 | 0.793140732 | 1           | AL359502.2 |
| ENSG00000236022 | 0.308355904 | 0.672939833 | -1.060865162 | 0.793140732 | 1           | AC106017.1 |
| ENSG00000239365 | 1.22840902  | 0.723690511 | 0.763894184  | 0.79324544  | 1           | RPS26P49   |
| ENSG00000240668 | 2.067800989 | 1.396630344 | 0.562545922  | 0.793283763 | 0.859335618 | KRT8P36    |
| ENSG00000240137 | 23.49919893 | 21.04389287 | 0.155589302  | 0.793587808 | 0.859594782 | ERICH6-AS1 |

|                 |             |             |              |             |             |            |
|-----------------|-------------|-------------|--------------|-------------|-------------|------------|
| ENSG00000234814 | 12.27384719 | 10.30167653 | 0.255899793  | 0.793613861 | 0.859594782 | SVIL2P     |
| novel.346       | 16.8070283  | 19.08528066 | -0.1807984   | 0.793622264 | 0.859594782 | -          |
| ENSG00000256030 | 0.586481695 | 1.161661783 | -0.968403766 | 0.793643054 | 1           | CBX3P4     |
| ENSG00000258485 | 0.586481695 | 1.161661783 | -0.968403766 | 0.793643054 | 1           | SRMP2      |
| ENSG00000229839 | 3.93054417  | 3.11911812  | 0.318545679  | 0.79367637  | 0.859617549 | AC018462.1 |
| ENSG00000237916 | 5.335034534 | 4.290236513 | 0.318123164  | 0.793721104 | 0.859630164 | AC011753.4 |
| ENSG00000256072 | 0.879722543 | 1.456837632 | -0.716556286 | 0.793802675 | 1           | AC078889.1 |
| ENSG00000147533 | 352.9209225 | 333.9511372 | 0.079135514  | 0.793869182 | 0.859754699 | GOLGA7     |
| ENSG00000266643 | 1.203193503 | 1.762625967 | -0.554314199 | 0.793915562 | 0.859769089 | MIR3677    |
| ENSG00000168874 | 1307.256608 | 1466.702853 | -0.166157872 | 0.794154163 | 0.859969843 | ATOH8      |
| ENSG00000254480 | 2.429095225 | 3.404837359 | -0.49718507  | 0.79417408  | 0.859969843 | AC015689.1 |
| ENSG00000278009 | 2.446717578 | 1.682349583 | 0.518346857  | 0.794200239 | 0.859969843 | AL139099.3 |
| ENSG00000230581 | 1.495180701 | 1.060160428 | 0.492873657  | 0.794230665 | 1           | ACTG1P14   |
| ENSG00000256944 | 1.835020366 | 2.486316478 | -0.445034131 | 0.794271152 | 0.860010786 | AP003721.3 |
| ENSG00000269858 | 171.7626043 | 186.330346  | -0.116322722 | 0.794334462 | 0.860043493 | EGLN2      |
| ENSG00000182923 | 464.3917913 | 446.2006984 | 0.057193805  | 0.794567729 | 0.860260206 | CEP63      |
| ENSG00000063176 | 463.4743595 | 442.7146044 | 0.065678689  | 0.794692754 | 0.860359716 | SPHK2      |
| ENSG00000268678 | 3.298717306 | 2.629111901 | 0.350274687  | 0.794762281 | 0.860399135 | AC005261.3 |
| novel.579       | 58.99617181 | 51.06365171 | 0.209424744  | 0.794824077 | 0.860430181 | -          |
| ENSG00000267313 | 4.308207111 | 3.12857473  | 0.451883532  | 0.79500697  | 0.860592312 | AC021504.1 |
| ENSG00000226842 | 0.61420451  | 1.029478846 | -0.761339041 | 0.795092766 | 1           | AL158834.1 |
| ENSG00000130612 | 1.524157165 | 1.10029862  | 0.478705778  | 0.795115419 | 1           | CYP2G1P    |
| ENSG00000213742 | 84.2498725  | 75.61858802 | 0.156919524  | 0.795411632 | 0.860903374 | ZNF337-AS1 |
| ENSG00000082929 | 2.639167628 | 1.823989131 | 0.542401877  | 0.795430079 | 0.860903374 | LINC01587  |
| ENSG00000286061 | 1.81990531  | 1.161661783 | 0.667876241  | 0.795479742 | 0.860903374 | RCAN3AS    |
| ENSG00000273727 | 1.81990531  | 1.161661783 | 0.667876241  | 0.795479742 | 0.860903374 | RF00003    |
| ENSG00000124784 | 377.126741  | 405.9116269 | -0.106846662 | 0.795485834 | 0.860903374 | RIOK1      |
| ENSG00000204611 | 169.405992  | 160.8188524 | 0.073612441  | 0.795493141 | 0.860903374 | ZNF616     |
| ENSG00000284999 | 0.925067711 | 1.518200796 | -0.708464325 | 0.795552974 | 1           | AL591518.1 |
| ENSG00000271659 | 5.47239496  | 4.199347643 | 0.375324588  | 0.795571486 | 0.860952299 | AL161729.4 |
| ENSG00000175470 | 686.2008944 | 712.6813404 | -0.054310788 | 0.795702254 | 0.861057948 | PPP2R2D    |
| ENSG00000269172 | 2.052685933 | 2.954969332 | -0.51316507  | 0.795745747 | 0.861062643 | AC011443.1 |
| ENSG00000274251 | 1.17296339  | 1.90542139  | -0.68306116  | 0.795772877 | 0.861062643 | AP003419.2 |
| ENSG00000260052 | 1.188078446 | 0.713078025 | 0.737139115  | 0.795861395 | 1           | AC023813.3 |
| novel.1082      | 1.188078446 | 0.713078025 | 0.737139115  | 0.795861395 | 1           | -          |
| ENSG00000213205 | 0.921306765 | 1.682349583 | -0.878450204 | 0.796048777 | 1           | STRADBP1   |
| ENSG00000270882 | 1.229662669 | 1.783850939 | -0.542973437 | 0.796149301 | 0.861398201 | HIST2H4A   |
| ENSG00000272940 | 1.229662669 | 1.783850939 | -0.542973437 | 0.796149301 | 0.861398201 | U62317.3   |
| ENSG00000265178 | 1.186824798 | 0.713078025 | 0.735840477  | 0.796225559 | 1           | MIR4728    |
| ENSG00000253558 | 0.616711807 | 1.029478846 | -0.756821473 | 0.796255579 | 1           | AC024568.1 |
| ENSG00000288010 | 0.616711807 | 1.029478846 | -0.756821473 | 0.796255579 | 1           | AL035587.3 |
| ENSG00000242659 | 0.616711807 | 1.029478846 | -0.756821473 | 0.796255579 | 1           | AC108693.2 |
| ENSG00000266801 | 1.188078446 | 1.722487775 | -0.541618669 | 0.796342354 | 0.861571196 | AC009137.2 |
| ENSG00000245888 | 6.116758311 | 5.084746798 | 0.268122376  | 0.796384753 | 0.861581189 | NSMCE1-DT  |
| ENSG00000253390 | 2.442956632 | 1.773238453 | 0.455588917  | 0.796537936 | 0.861689117 | AC104561.1 |
| ENSG00000261044 | 1.814890715 | 1.161661783 | 0.664343617  | 0.796550846 | 0.861689117 | AP006547.1 |
| ENSG00000100092 | 142.4726097 | 154.4589989 | -0.11549628  | 0.796604593 | 0.86171138  | SH3BP1     |
| ENSG00000246548 | 3.634796025 | 4.42241945  | -0.271411383 | 0.796722534 | 0.861803079 | LINC02288  |
| ENSG00000225092 | 1.17296339  | 1.874739808 | -0.66150791  | 0.796851862 | 0.861907087 | AL355336.1 |
| ENSG00000258477 | 1.538018572 | 1.029478846 | 0.555808942  | 0.796900718 | 1           | PPIAP6     |
| ENSG00000123838 | 1.17296339  | 0.693008929 | 0.75295468   | 0.797022084 | 1           | C4BPA      |



|                 |             |             |              |             |             |              |
|-----------------|-------------|-------------|--------------|-------------|-------------|--------------|
| ENSG00000287576 | 1.17296339  | 0.693008929 | 0.75295468   | 0.797022084 | 1           | AC067930.8   |
| ENSG00000250129 | 1.17296339  | 0.693008929 | 0.75295468   | 0.797022084 | 1           | AC116424.1   |
| ENSG00000261654 | 3.579350395 | 4.656232136 | -0.376765514 | 0.797090197 | 0.862128987 | AL360270.2   |
| ENSG00000075223 | 986.4625746 | 1040.623443 | -0.077270338 | 0.797250554 | 0.862266533 | SEMA3C       |
| ENSG00000167748 | 1.850135422 | 1.00940975  | 0.860510596  | 0.797325003 | 0.862275263 | KLK1         |
| ENSG00000267938 | 1.850135422 | 1.00940975  | 0.860510596  | 0.797325003 | 0.862275263 | EIF1P6       |
| ENSG00000240625 | 2.714742909 | 3.537020296 | -0.384446028 | 0.797745034 | 0.862693599 | RN7SL403P    |
| ENSG00000132005 | 378.9650241 | 364.4679191 | 0.056962296  | 0.797829486 | 0.862742025 | RFX1         |
| ENSG00000202382 | 2.376156893 | 1.548882377 | 0.636474206  | 0.797875805 | 0.862742025 | RF00019      |
| ENSG00000010810 | 2957.724948 | 3067.926361 | -0.05284102  | 0.797889434 | 0.862742025 | FYN          |
| ENSG00000219608 | 2.3900183   | 1.762625967 | 0.435063535  | 0.798182101 | 0.863022563 | HIGD1AP16    |
| ENSG00000287337 | 2.124500267 | 2.832243005 | -0.420118285 | 0.798267036 | 0.863040884 | AC005962.2   |
| ENSG00000261934 | 23.77607107 | 26.04836329 | -0.135268536 | 0.798284713 | 0.863040884 | PCDHGA9      |
| ENSG00000287445 | 5.468562742 | 6.616000224 | -0.283584126 | 0.798326179 | 0.863040884 | AC092803.4   |
| ENSG00000188242 | 7.53761738  | 6.512058724 | 0.216098092  | 0.798331919 | 0.863040884 | AC010442.1   |
| ENSG00000272886 | 548.0155354 | 574.0474599 | -0.06638475  | 0.798386713 | 0.863064209 | DCP1A        |
| ENSG00000266718 | 3.915429114 | 4.708138689 | -0.259590501 | 0.798438222 | 0.863083979 | AC079336.5   |
| ENSG00000229431 | 16.87884264 | 18.70982843 | -0.146291171 | 0.798475108 | 0.863087942 | AL139289.1   |
| ENSG00000275709 | 2.436617117 | 1.793307549 | 0.440065357  | 0.798639874 | 0.863205217 | AC090527.3   |
| ENSG00000185250 | 34.28392021 | 31.26747638 | 0.135738639  | 0.798650052 | 0.863205217 | PPIL6        |
| ENSG00000187630 | 71.07286692 | 63.33858132 | 0.163182885  | 0.798765327 | 0.863293895 | DHRS4L2      |
| ENSG00000253932 | 0.600343103 | 1.00940975  | -0.762892031 | 0.79880332  | 1           | AC019270.1   |
| ENSG00000169605 | 0.600343103 | 1.00940975  | -0.762892031 | 0.79880332  | 1           | GKN1         |
| ENSG00000212385 | 0.600343103 | 1.00940975  | -0.762892031 | 0.79880332  | 1           | RNU6-817P    |
| ENSG00000267005 | 0.600343103 | 1.00940975  | -0.762892031 | 0.79880332  | 1           | AC002984.1   |
| ENSG00000122557 | 555.3685368 | 576.0316635 | -0.052488644 | 0.798893534 | 0.863396543 | HERPUD2      |
| ENSG00000275833 | 7.561579249 | 6.510902848 | 0.219224371  | 0.798982121 | 0.863456365 | AC073107.2   |
| ENSG00000261243 | 0.921306765 | 1.4981317   | -0.696340486 | 0.799112391 | 1           | AC022165.1   |
| ENSG00000214293 | 151.3124596 | 144.0222325 | 0.071654143  | 0.799239071 | 0.863698124 | APTR         |
| ENSG00000111799 | 6305.027414 | 6609.605003 | -0.068035321 | 0.79950139  | 0.863945665 | COL12A1      |
| ENSG00000185033 | 946.2503782 | 856.5271044 | 0.143999573  | 0.799540647 | 0.863952152 | SEMA4B       |
| ENSG00000276809 | 2.127007565 | 2.812173909 | -0.410743731 | 0.799619043 | 0.864000929 | AL138955.1   |
| ENSG00000259735 | 1.17296339  | 1.885352294 | -0.669284497 | 0.799876319 | 0.864233304 | AC092868.2   |
| ENSG00000165406 | 46.65228996 | 50.6573895  | -0.118493529 | 0.799900629 | 0.864233304 | 8-Mar        |
| ENSG00000233912 | 3.270994492 | 4.199347643 | -0.362043034 | 0.800095538 | 0.864368144 | AC026202.2   |
| ENSG00000146722 | 1.22840902  | 1.793307549 | -0.550556715 | 0.800140675 | 0.864368144 | AC211486.1   |
| ENSG00000211581 | 2.40137241  | 1.793307549 | 0.423044312  | 0.800154341 | 0.864368144 | MIR765       |
| ENSG00000177993 | 3.623441915 | 2.934900236 | 0.315029994  | 0.80015851  | 0.864368144 | ZNRF3-AS1    |
| novel.944       | 20.88746938 | 23.25728596 | -0.151613406 | 0.800222451 | 0.864401277 | -            |
| ENSG00000180712 | 2.708474665 | 3.718798035 | -0.44964577  | 0.800409651 | 0.864532569 | LINC02363    |
| ENSG00000241014 | 10.51286373 | 12.0147077  | -0.185269031 | 0.800418683 | 0.864532569 | AC114490.1   |
| novel.240       | 9.930142978 | 8.215633278 | 0.273614002  | 0.800467345 | 0.864532569 | -            |
| ENSG00000275479 | 1.186824798 | 1.733100261 | -0.549066781 | 0.800477097 | 0.864532569 | AC087741.2   |
| ENSG00000273321 | 2.14337627  | 1.345879667 | 0.654970048  | 0.800614532 | 0.864617799 | AC023983.2   |
| ENSG00000165449 | 21.40360386 | 25.88806731 | -0.277902008 | 0.800622571 | 0.864617799 | SLC16A9      |
| ENSG00000162852 | 439.3993058 | 419.3363302 | 0.067962082  | 0.800780211 | 0.864749401 | CNST         |
| ENSG00000164366 | 515.5443825 | 497.9111847 | 0.049917643  | 0.800811    | 0.864749401 | CCDC127      |
| ENSG00000226746 | 1.511549406 | 2.169915658 | -0.519856928 | 0.800982402 | 0.864898541 | SMCR5        |
| ENSG00000261618 | 1.215801261 | 1.782695063 | -0.555679677 | 0.801025679 | 0.864899141 | LINC02605    |
| ENSG00000284968 | 35.81943148 | 39.29413988 | -0.129246049 | 0.801049538 | 0.864899141 | AC093827.4   |
| ENSG00000064489 | 1.203193503 | 1.733100261 | -0.534019355 | 0.801257797 | 0.865061369 | BORCS8-MEF2B |

|                 |             |             |              |             |             |            |
|-----------------|-------------|-------------|--------------|-------------|-------------|------------|
| ENSG00000102128 | 2.113146158 | 1.4981317   | 0.511454591  | 0.801266381 | 0.865061369 | RAB40AL    |
| ENSG00000258695 | 1.22840902  | 0.743759607 | 0.732626162  | 0.801350582 | 1           | AC005225.3 |
| ENSG00000120686 | 1764.406043 | 1824.164355 | -0.047894347 | 0.801491348 | 0.865268292 | UFM1       |
| ENSG00000105613 | 9.448284298 | 11.28027631 | -0.247751467 | 0.801774896 | 0.865538437 | MAST1      |
| ENSG00000255334 | 1.493927053 | 1.080229524 | 0.474328761  | 0.801822113 | 1           | AP000907.2 |
| ENSG00000131848 | 64.19888834 | 60.44210265 | 0.088705658  | 0.802193434 | 0.86595428  | ZSCAN5A    |
| ENSG00000234160 | 36.92656405 | 40.3984197  | -0.13065696  | 0.802237476 | 0.865965842 | AL513165.1 |
| ENSG00000249379 | 4.472934345 | 5.827350529 | -0.376796683 | 0.802339229 | 0.865992467 | AL033397.2 |
| ENSG00000287676 | 2.108131562 | 1.4981317   | 0.508571354  | 0.802343262 | 0.865992467 | AC096642.2 |
| ENSG00000162188 | 2.052685933 | 2.91483114  | -0.495750168 | 0.80240111  | 0.865992467 | GNG3       |
| ENSG00000227627 | 4.52336538  | 3.455588036 | 0.379174445  | 0.802435734 | 0.865992467 | AL080276.2 |
| ENSG00000273384 | 4.803998469 | 3.964379082 | 0.281544275  | 0.802448696 | 0.865992467 | AL137796.1 |
| ENSG00000274372 | 3.330201067 | 2.557136252 | 0.386643234  | 0.802462132 | 0.865992467 | AC239803.3 |
| ENSG00000206838 | 7.055687429 | 5.859187986 | 0.271234741  | 0.802641352 | 0.866114243 | SNORA5A    |
| ENSG00000257596 | 4.208669961 | 5.308974479 | -0.319322426 | 0.802641647 | 0.866114243 | SCAT2      |
| ENSG00000113068 | 1341.859522 | 1297.306042 | 0.048631958  | 0.802703547 | 0.866145064 | PFDN1      |
| novel.906       | 1011.369779 | 1091.678979 | -0.11022947  | 0.802750573 | 0.866159834 | -          |
| ENSG00000131002 | 619.5056566 | 361.7732307 | 0.775955217  | 0.80293129  | 0.866318847 | TXLNGY     |
| ENSG00000130711 | 1.17296339  | 1.844058227 | -0.640681241 | 0.803214844 | 0.866588798 | PRDM12     |
| ENSG00000103415 | 52.05785735 | 44.94001664 | 0.212069773  | 0.803331178 | 0.866678322 | HMOX2      |
| ENSG00000221598 | 2.430348874 | 1.813376645 | 0.425046758  | 0.803405789 | 0.866722826 | MIR1249    |
| ENSG00000178502 | 63.77240402 | 59.3880596  | 0.102243661  | 0.803615714 | 0.866913297 | KLHL11     |
| ENSG00000284830 | 1.230916317 | 0.774441189 | 0.691393666  | 0.803678653 | 1           | AL049557.1 |
| ENSG00000213341 | 578.0058498 | 554.7557214 | 0.058681202  | 0.803754733 | 0.867027267 | CHUK       |
| ENSG00000136709 | 1194.167072 | 1231.509852 | -0.044409537 | 0.80406483  | 0.867325764 | WDR33      |
| ENSG00000224020 | 19.07981583 | 22.07324333 | -0.206985063 | 0.804105118 | 0.867333212 | MIR181A2HG |
| ENSG00000231073 | 2.666890443 | 3.576002612 | -0.419341778 | 0.804381084 | 0.867594858 | AL590133.1 |
| ENSG00000162714 | 915.1017852 | 961.7811413 | -0.071540892 | 0.804557782 | 0.867749418 | ZNF496     |
| ENSG00000135655 | 915.2183304 | 881.7472437 | 0.053464623  | 0.804821276 | 0.867975616 | USP15      |
| ENSG00000173898 | 83.93409346 | 91.81673104 | -0.13185617  | 0.804834324 | 0.867975616 | SPTBN2     |
| ENSG00000130772 | 5.141330836 | 4.33153058  | 0.250574679  | 0.804978452 | 0.868068376 | MED18      |
| ENSG00000124588 | 550.8322063 | 513.0119235 | 0.10289098   | 0.80498716  | 0.868068376 | NQO2       |
| ENSG00000180011 | 525.5839061 | 545.4648204 | -0.053863943 | 0.8050577   | 0.868108413 | ZADH2      |
| ENSG00000278607 | 0.61420451  | 1.161661783 | -0.911675673 | 0.805088124 | 1           | AC015819.2 |
| ENSG00000236745 | 0.61420451  | 1.161661783 | -0.911675673 | 0.805088124 | 1           | YRDCP2     |
| ENSG00000139719 | 227.022347  | 238.029719  | -0.068716253 | 0.805111949 | 0.868122141 | VPS33A     |
| ENSG00000235958 | 7.912773023 | 8.96769362  | -0.183041864 | 0.805137259 | 0.868122141 | UBOX5-AS1  |
| ENSG00000284697 | 1.50778846  | 1.029478846 | 0.532467555  | 0.805205755 | 1           | AC006511.5 |
| ENSG00000215305 | 582.8367878 | 601.4130419 | -0.045102848 | 0.805311018 | 0.868273459 | VPS16      |
| ENSG00000155636 | 210.4429425 | 200.1738416 | 0.070915536  | 0.805383142 | 0.868315188 | RBM45      |
| ENSG00000177595 | 656.222601  | 697.069431  | -0.087292102 | 0.805421372 | 0.868320373 | PIDD1      |
| ENSG00000228661 | 3.301224604 | 2.415496705 | 0.441381399  | 0.805455451 | 0.868321082 | AC090587.1 |
| ENSG00000132664 | 309.4185648 | 320.7130194 | -0.052251716 | 0.805568637 | 0.868407069 | POLR3F     |
| ENSG00000235413 | 1.541779519 | 2.191140629 | -0.507758136 | 0.805733303 | 0.868545914 | KRT18P63   |
| ENSG00000180900 | 392.0836054 | 416.6021469 | -0.087757143 | 0.805783921 | 0.868545914 | SCRIB      |
| ENSG00000140319 | 4456.711226 | 4291.4557   | 0.054534305  | 0.805797726 | 0.868545914 | SRP14      |
| ENSG00000273175 | 0.615458159 | 1.00940975  | -0.734928298 | 0.805862658 | 1           | BX323046.1 |
| ENSG00000200065 | 0.615458159 | 1.00940975  | -0.734928298 | 0.805862658 | 1           | RF00019    |
| ENSG00000118508 | 1002.839415 | 1052.298064 | -0.069690199 | 0.805884614 | 0.868603533 | RAB32      |
| ENSG00000075239 | 990.7268789 | 949.9874761 | 0.060409766  | 0.805931757 | 0.868606863 | ACAT1      |
| ENSG00000178187 | 29.82706983 | 32.50979973 | -0.12708978  | 0.805954569 | 0.868606863 | ZNF454     |

|                 |             |             |              |             |             |            |
|-----------------|-------------|-------------|--------------|-------------|-------------|------------|
| ENSG00000185379 | 233.6469353 | 247.751656  | -0.085405444 | 0.806041024 | 0.868664006 | RAD51D     |
| ENSG00000259682 | 0.616711807 | 1.161661783 | -0.906659798 | 0.806103915 | 1           | AC091231.1 |
| ENSG00000287192 | 2.405133356 | 3.129730605 | -0.386462614 | 0.806272261 | 0.868872763 | AL031005.2 |
| ENSG00000106211 | 7081.179423 | 7551.429679 | -0.092801954 | 0.806301617 | 0.868872763 | HSPB1      |
| ENSG00000267980 | 7.867427855 | 6.765940506 | 0.21426918   | 0.806345695 | 0.868884223 | AC007292.1 |
| ENSG00000272711 | 48.49866443 | 52.72135588 | -0.123819017 | 0.806417678 | 0.868925751 | AC019069.1 |
| ENSG00000230289 | 0.879722543 | 1.406086955 | -0.672821421 | 0.80649313  | 1           | AL358781.2 |
| ENSG00000249961 | 0.879722543 | 1.406086955 | -0.672821421 | 0.80649313  | 1           | TERB1      |
| ENSG00000201684 | 0.879722543 | 1.406086955 | -0.672821421 | 0.80649313  | 1           | RN7SKP239  |
| ENSG00000214719 | 12.39197561 | 10.98522885 | 0.181351988  | 0.806561292 | 0.869044455 | AC005562.1 |
| ENSG00000262691 | 45.59967755 | 41.94332087 | 0.12578514   | 0.80673686  | 0.869197576 | AC040160.1 |
| ENSG00000234329 | 4.554849141 | 5.410604229 | -0.24781907  | 0.806879612 | 0.869286862 | AL604028.2 |
| ENSG00000139370 | 810.5066628 | 777.0265533 | 0.061024692  | 0.806886647 | 0.869286862 | SLC15A4    |
| ENSG00000143614 | 39.99027817 | 37.13265335 | 0.110728038  | 0.807104993 | 0.869486039 | GATAD2B    |
| ENSG00000230629 | 49.6325509  | 53.95345225 | -0.119721886 | 0.807224104 | 0.8695783   | RPS23P8    |
| ENSG00000132031 | 170.65037   | 194.5698325 | -0.190127313 | 0.807327195 | 0.869653296 | MATN3      |
| ENSG00000270607 | 72.87368277 | 67.3799791  | 0.115640806  | 0.807371362 | 0.869664816 | AC009549.1 |
| ENSG00000286074 | 1.521649867 | 1.029478846 | 0.544459925  | 0.807429655 | 1           | AC110795.1 |
| ENSG00000104936 | 1687.869291 | 1598.647184 | 0.078491682  | 0.807521847 | 0.86979085  | DMPK       |
| ENSG00000255410 | 1.229662669 | 1.762625967 | -0.529343542 | 0.807690179 | 0.869913959 | AC091564.5 |
| ENSG00000255966 | 3.926783224 | 4.637318915 | -0.241609036 | 0.80771177  | 0.869913959 | AC006064.3 |
| ENSG00000149532 | 1384.289142 | 1330.313622 | 0.057478159  | 0.80773659  | 0.869913959 | CPSF7      |
| ENSG00000225364 | 0.879722543 | 1.386017859 | -0.655019396 | 0.807917541 | 1           | ATP6V0E1P1 |
| ENSG00000214026 | 523.2013816 | 545.9838863 | -0.061176236 | 0.808052775 | 0.870218411 | MRPL23     |
| ENSG00000135436 | 9.348747149 | 8.174339211 | 0.191120651  | 0.808164942 | 0.870287378 | FAM186B    |
| ENSG00000165828 | 2.3900183   | 1.682349583 | 0.489590711  | 0.808197212 | 0.870287378 | PRAP1      |
| ENSG00000257497 | 15.13694863 | 17.38388946 | -0.193805743 | 0.808244089 | 0.870287378 | AC121761.1 |
| ENSG00000139636 | 891.6421322 | 843.7096922 | 0.080118484  | 0.808250804 | 0.870287378 | LMBR1L     |
| ENSG00000227081 | 693.7745784 | 743.0056373 | -0.098942404 | 0.808395212 | 0.870406797 | AC005912.1 |
| ENSG00000171469 | 516.8737248 | 498.0940711 | 0.053295749  | 0.80852571  | 0.870491868 | ZNF561     |
| ENSG00000274525 | 2.697120555 | 2.079026788 | 0.362927856  | 0.808594278 | 0.870491868 | AC008443.7 |
| ENSG00000233013 | 3.310071416 | 2.52645467  | 0.392237768  | 0.808621257 | 0.870491868 | FAM157B    |
| ENSG00000085365 | 953.0490893 | 1003.574029 | -0.074341226 | 0.808637333 | 0.870491868 | SCAMP1     |
| ENSG00000252192 | 1.50778846  | 2.079026788 | -0.472325399 | 0.808641748 | 0.870491868 | RF00411    |
| ENSG00000262420 | 1.495180701 | 1.10029862  | 0.45758345   | 0.808709475 | 1           | AC007613.1 |
| ENSG00000285184 | 35.47486196 | 32.05980331 | 0.145270328  | 0.808821892 | 0.870649718 | AC244033.2 |
| ENSG00000176927 | 7.18140901  | 8.305366273 | -0.203366326 | 0.809033435 | 0.87084135  | EFCAB5     |
| ENSG00000230290 | 1.493927053 | 1.029478846 | 0.521685207  | 0.809051962 | 1           | ARMC2-AS1  |
| ENSG00000260908 | 2.712235611 | 2.099095884 | 0.359345837  | 0.809132582 | 0.87091199  | AC009093.3 |
| ENSG00000276823 | 1.17296339  | 0.723690511 | 0.705968186  | 0.809133062 | 1           | RF00017    |
| novel.409       | 12.73571877 | 10.69848213 | 0.249820871  | 0.809185664 | 0.870933036 | -          |
| ENSG00000225419 | 3.389407643 | 2.406040094 | 0.482668124  | 0.809229688 | 0.870933036 | RPL21P3    |
| ENSG00000077522 | 11.84199227 | 14.21517654 | -0.258374924 | 0.809252701 | 0.870933036 | ACTN2      |
| ENSG00000251363 | 1.54052587  | 1.049547942 | 0.53882165   | 0.809388852 | 1           | LINC02315  |
| ENSG00000177932 | 198.4003376 | 189.4097111 | 0.06792183   | 0.809479234 | 0.871140749 | ZNF354C    |
| ENSG00000242798 | 8.606029026 | 10.22140015 | -0.240281128 | 0.809888403 | 0.87146935  | AC073842.2 |
| ENSG00000079435 | 68.458701   | 74.7306675  | -0.127231736 | 0.809906888 | 0.87146935  | LIPE       |
| ENSG00000180902 | 446.0638686 | 463.2927512 | -0.05479514  | 0.809924491 | 0.87146935  | D2HGDH     |
| ENSG00000281691 | 6.313040578 | 5.247611316 | 0.280951711  | 0.809938682 | 0.87146935  | RBM5-AS1   |
| ENSG00000262140 | 2.962638588 | 2.11916498  | 0.482326942  | 0.809952288 | 0.87146935  | AC010653.1 |
| ENSG00000265802 | 1.509042109 | 1.130980201 | 0.443199039  | 0.809980394 | 1           | RN7SL49P   |

|                 |             |             |              |             |             |            |
|-----------------|-------------|-------------|--------------|-------------|-------------|------------|
| ENSG00000257752 | 3.632288727 | 2.985650913 | 0.300368058  | 0.810012554 | 0.871498101 | AC091516.1 |
| ENSG00000108306 | 509.6635959 | 483.7185861 | 0.075996773  | 0.810194297 | 0.871657544 | FBXL20     |
| ENSG00000131779 | 518.6965362 | 535.4448819 | -0.045810236 | 0.810432278 | 0.871877475 | PEX11B     |
| ENSG00000182774 | 3.049567979 | 3.853421116 | -0.345876732 | 0.810494641 | 0.871908462 | RPS17      |
| ENSG00000188523 | 2.436617117 | 3.139187216 | -0.375506959 | 0.810530641 | 0.871911087 | CFAP77     |
| ENSG00000231084 | 6.612549669 | 5.595977988 | 0.232942498  | 0.810582575 | 0.871930852 | RPL22P24   |
| novel.880       | 54.85224905 | 47.38306563 | 0.213352044  | 0.810771966 | 0.872093851 | -          |
| ENSG00000217889 | 2.737451129 | 2.038888596 | 0.404495742  | 0.810801238 | 0.872093851 | KRT18P48   |
| ENSG00000121440 | 467.4954902 | 414.1165627 | 0.175142829  | 0.810920891 | 0.872154133 | PDZRN3     |
| novel.796       | 17.10180753 | 15.21654235 | 0.16226399   | 0.810924421 | 0.872154133 | -          |
| ENSG00000251474 | 191.7808077 | 179.9155503 | 0.092975634  | 0.811165489 | 0.87237729  | RPL32P3    |
| ENSG00000284491 | 1.218308559 | 0.774441189 | 0.67764697   | 0.811247494 | 1           | THSD8      |
| ENSG00000260139 | 4.196062203 | 3.2194636   | 0.382665239  | 0.811370017 | 0.872561133 | CSPG4P13   |
| ENSG00000230844 | 75.8268338  | 81.33579845 | -0.09917559  | 0.811510398 | 0.872675979 | ZNF674-AS1 |
| ENSG00000050438 | 83.61568053 | 91.15243027 | -0.123006273 | 0.811556045 | 0.872688945 | SLC4A8     |
| ENSG00000270557 | 5.628275382 | 4.606637334 | 0.2899637    | 0.811616578 | 0.872717917 | AC013731.1 |
| ENSG00000175354 | 610.4778569 | 591.5642686 | 0.045753678  | 0.811905652 | 0.872992622 | PTPN2      |
| novel.919       | 15.4002441  | 12.0641741  | 0.355213002  | 0.811977145 | 0.873033364 | -          |
| ENSG00000273233 | 1.495180701 | 1.110911105 | 0.449585133  | 0.811988806 | 1           | AC097724.1 |
| ENSG00000115840 | 495.3613803 | 478.7218813 | 0.048962314  | 0.812032657 | 0.87305692  | SLC25A12   |
| ENSG00000239377 | 4.809013064 | 6.0421216   | -0.317618021 | 0.812123671 | 0.873118642 | AC073111.1 |
| ENSG00000232931 | 637.350498  | 591.1839698 | 0.108639432  | 0.812235823 | 0.873203084 | LINC00342  |
| ENSG00000228507 | 1.214547612 | 0.774441189 | 0.673804656  | 0.812328508 | 1           | DAP3P2     |
| ENSG00000101997 | 408.7919518 | 392.7366919 | 0.058516834  | 0.812481748 | 0.873431327 | CCDC22     |
| ENSG00000274560 | 1.200686205 | 0.774441189 | 0.660515909  | 0.812509897 | 1           | AC010205.1 |
| ENSG00000229927 | 3.605819561 | 4.270167417 | -0.244515349 | 0.81257763  | 0.873483089 | RHEBP1     |
| ENSG00000287697 | 2.138361675 | 1.548882377 | 0.487616473  | 0.812597139 | 0.873483089 | Z99127.4   |
| ENSG00000236583 | 1.54052587  | 1.060160428 | 0.529232073  | 0.8127034   | 1           | AP004290.1 |
| ENSG00000184428 | 259.9324071 | 273.8293698 | -0.074651866 | 0.812789947 | 0.873620153 | TOP1MT     |
| ENSG00000279311 | 3.967113797 | 3.200550379 | 0.304192882  | 0.8127919   | 0.873620153 | AC092999.1 |
| ENSG00000287839 | 34.42489904 | 31.08467116 | 0.145620536  | 0.812826684 | 0.873621399 | AL353807.5 |
| ENSG00000241671 | 0.907445357 | 1.426156051 | -0.653909307 | 0.81295024  | 1           | AC117394.1 |
| ENSG00000265094 | 0.907445357 | 1.426156051 | -0.653909307 | 0.81295024  | 1           | AC007922.2 |
| ENSG00000284523 | 3.912921816 | 3.12857473  | 0.311772157  | 0.813013267 | 0.87378579  | AC004834.1 |
| ENSG00000225527 | 1.526664462 | 1.049547942 | 0.527983449  | 0.813143742 | 1           | AL450384.1 |
| ENSG00000171163 | 699.6979515 | 665.5023524 | 0.072495259  | 0.813307515 | 0.874065875 | ZNF692     |
| novel.783       | 136.5509513 | 146.9012922 | -0.105052393 | 0.81337784  | 0.874105297 | -          |
| ENSG00000226009 | 3.924275926 | 4.728207785 | -0.262901316 | 0.813498389 | 0.874182871 | KCNIP2-AS1 |
| ENSG00000274654 | 3.588197208 | 2.782648203 | 0.359503677  | 0.813517318 | 0.874182871 | AC022467.1 |
| ENSG00000261610 | 1.233423615 | 0.672939833 | 0.856921451  | 0.813551267 | 1           | AP000265.1 |
| ENSG00000286234 | 1.233423615 | 0.672939833 | 0.856921451  | 0.813551267 | 1           | AC079790.2 |
| ENSG00000221184 | 14.92283055 | 16.85515772 | -0.172701134 | 0.813980022 | 0.874643903 | AL513534.1 |
| ENSG00000274751 | 3.239510731 | 2.446178286 | 0.402934095  | 0.814222702 | 0.874868488 | AC120498.9 |
| ENSG00000113552 | 640.4320007 | 662.404121  | -0.048731658 | 0.814349335 | 0.874968367 | GNPDA1     |
| ENSG00000236375 | 1.521649867 | 1.049547942 | 0.524084857  | 0.814496253 | 1           | POU5F1P5   |
| ENSG00000142892 | 1025.408504 | 1073.38534  | -0.066295276 | 0.814562258 | 0.875160947 | PIGK       |
| ENSG00000268883 | 1.511549406 | 1.060160428 | 0.506181361  | 0.814651785 | 1           | PNMA6B     |
| ENSG00000180530 | 632.3339432 | 672.2103243 | -0.087910489 | 0.814666108 | 0.875236329 | NRIP1      |
| ENSG00000244073 | 3.896553111 | 4.799027558 | -0.289274805 | 0.814738783 | 0.875278214 | RPS4XP6    |
| ENSG00000256995 | 1.22840902  | 0.672939833 | 0.851534565  | 0.814783614 | 1           | AC084816.1 |
| ENSG00000236554 | 1.22840902  | 0.672939833 | 0.851534565  | 0.814783614 | 1           | ASNSP3     |

|                 |             |             |              |             |             |            |
|-----------------|-------------|-------------|--------------|-------------|-------------|------------|
| ENSG00000207588 | 1.22840902  | 0.672939833 | 0.851534565  | 0.814783614 | 1           | MIR593     |
| ENSG00000280415 | 1.22840902  | 0.672939833 | 0.851534565  | 0.814783614 | 1           | AC005252.3 |
| ENSG00000235677 | 4.1771862   | 5.023383634 | -0.261464661 | 0.81483549  | 0.875345912 | NPM1P26    |
| ENSG00000267253 | 2.06654734  | 1.345879667 | 0.607175807  | 0.815037071 | 0.875520442 | WHSC1L2P   |
| ENSG00000212396 | 1.759445085 | 2.679862578 | -0.59383798  | 0.815068666 | 0.875520442 | RNA5SP323  |
| ENSG00000287985 | 2.752566185 | 2.099095884 | 0.378241958  | 0.815099051 | 0.875520442 | AC073270.2 |
| ENSG00000222248 | 2.067800989 | 1.487519214 | 0.491291278  | 0.815155919 | 0.875545328 | RNA5SP201  |
| ENSG00000270030 | 3.631035079 | 2.844011366 | 0.349873753  | 0.815376022 | 0.875678943 | AC136475.7 |
| ENSG00000272369 | 5.851240278 | 4.697526203 | 0.315463671  | 0.815389421 | 0.875678943 | AC008035.1 |
| ENSG00000210135 | 2579.925069 | 2722.659262 | -0.077621268 | 0.815411648 | 0.875678943 | MT-TN      |
| ENSG00000198026 | 597.8347388 | 626.3494538 | -0.066741514 | 0.815415137 | 0.875678943 | ZNF335     |
| ENSG00000204950 | 4.194808554 | 5.155566571 | -0.28766083  | 0.8156142   | 0.875856516 | LRRC10B    |
| ENSG00000212747 | 382.9328218 | 401.3061798 | -0.068276123 | 0.815928941 | 0.876158289 | RTL8B      |
| ENSG00000186010 | 45.81644547 | 42.65652729 | 0.106426847  | 0.816230851 | 0.876446262 | NDUFA13    |
| ENSG00000162604 | 574.5050089 | 554.2729076 | 0.051426558  | 0.816300084 | 0.876484378 | TM2D1      |
| ENSG00000263089 | 1.526664462 | 1.060160428 | 0.51839494   | 0.816461503 | 1           | AC007114.2 |
| ENSG00000221949 | 24.49572497 | 27.22996577 | -0.150242342 | 0.816472698 | 0.876633489 | LINC01465  |
| ENSG00000136869 | 1054.712667 | 934.2427055 | 0.174798592  | 0.816579712 | 0.876712157 | TLR4       |
| ENSG00000214725 | 4.282991593 | 3.52640781  | 0.269400709  | 0.816759802 | 0.876869274 | CDIPTOSP   |
| ENSG00000226493 | 0.879722543 | 1.365948763 | -0.637090411 | 0.816861271 | 1           | RPL26P27   |
| ENSG00000228019 | 2.082916045 | 1.518200796 | 0.477851215  | 0.816964132 | 0.877052399 | AC006480.1 |
| ENSG00000286899 | 1.17296339  | 0.743759607 | 0.67467028   | 0.817265776 | 1           | AL139286.3 |
| ENSG00000207151 | 1.17296339  | 0.743759607 | 0.67467028   | 0.817265776 | 1           | RF00019    |
| ENSG00000254315 | 1.17296339  | 0.743759607 | 0.67467028   | 0.817265776 | 1           | AC023632.5 |
| ENSG00000288016 | 1.17296339  | 0.743759607 | 0.67467028   | 0.817265776 | 1           | AL162493.1 |
| ENSG00000259699 | 1.17296339  | 0.743759607 | 0.67467028   | 0.817265776 | 1           | HMGB1P8    |
| ENSG00000135148 | 808.6688616 | 781.990162  | 0.048218256  | 0.817399112 | 0.877483114 | TRAFD1     |
| ENSG00000235076 | 2.080408748 | 1.518200796 | 0.47638939   | 0.817506291 | 0.877561912 | GAPDHP52   |
| ENSG00000224725 | 4.585079253 | 5.442441685 | -0.246526197 | 0.817690284 | 0.877723156 | CEP57L1P1  |
| ENSG00000261000 | 0.586481695 | 1.069617038 | -0.86146992  | 0.8178297   | 1           | AC244034.2 |
| ENSG00000231849 | 0.586481695 | 1.069617038 | -0.86146992  | 0.8178297   | 1           | UBE2V2P4   |
| ENSG00000270722 | 0.586481695 | 1.069617038 | -0.86146992  | 0.8178297   | 1           | RF00003    |
| ENSG00000244226 | 0.586481695 | 1.069617038 | -0.86146992  | 0.8178297   | 1           | ILF2P1     |
| ENSG00000257202 | 0.586481695 | 1.069617038 | -0.86146992  | 0.8178297   | 1           | AC084398.2 |
| ENSG00000238103 | 145.6927459 | 156.283596  | -0.101274061 | 0.81787859  | 0.877889016 | RPL9P7     |
| ENSG00000238120 | 2.158491326 | 2.985650913 | -0.464674758 | 0.818081335 | 0.878070361 | LINC01589  |
| ENSG00000122417 | 639.0327533 | 666.9083107 | -0.06156945  | 0.81815103  | 0.87810889  | ODF2L      |
| ENSG00000187185 | 5.353910537 | 4.075337048 | 0.400933953  | 0.818279712 | 0.878150141 | AC092118.1 |
| ENSG00000027869 | 33.21188981 | 38.33817774 | -0.208226844 | 0.818281565 | 0.878150141 | SH2D2A     |
| ENSG00000287168 | 89.20802703 | 83.64606939 | 0.095418682  | 0.818290863 | 0.878150141 | AL512625.4 |
| ENSG00000260490 | 5.469816391 | 4.546430046 | 0.256488488  | 0.818400777 | 0.878224669 | MYL12BP1   |
| ENSG00000233296 | 2.431602522 | 1.90542139  | 0.375104042  | 0.818443191 | 0.878224669 | AC092159.2 |
| ENSG00000197882 | 1.481319294 | 1.029478846 | 0.512579928  | 0.818487464 | 1           | OR7E13P    |
| ENSG00000143702 | 137.7214509 | 146.9906737 | -0.093539802 | 0.818494118 | 0.878224669 | CEP170     |
| ENSG00000177757 | 9.025276189 | 7.673848901 | 0.227083779  | 0.818495521 | 0.878224669 | FAM87B     |
| ENSG00000259630 | 2.709728314 | 2.069570178 | 0.375782554  | 0.818581185 | 0.878280312 | AC104046.1 |
| ENSG00000163453 | 9908.731866 | 9080.732338 | 0.125864369  | 0.818620814 | 0.878286561 | IGFBP7     |
| ENSG00000229097 | 23.44472222 | 21.42037259 | 0.135190637  | 0.818725304 | 0.878335366 | CALM2P2    |
| ENSG00000171345 | 40.34440616 | 48.53878528 | -0.268461703 | 0.818733917 | 0.878335366 | KRT19      |
| ENSG00000229759 | 1.510295757 | 1.069617038 | 0.49471611   | 0.818797665 | 1           | MRPS18AP1  |
| ENSG00000157978 | 440.5496155 | 409.3217984 | 0.105754296  | 0.818838148 | 0.878410914 | LDLRAP1    |

|                 |             |             |              |             |             |            |
|-----------------|-------------|-------------|--------------|-------------|-------------|------------|
| ENSG00000229043 | 173.2079238 | 184.24414   | -0.089489489 | 0.818875295 | 0.878414493 | AC091729.3 |
| ENSG00000260425 | 10.80234363 | 12.13871829 | -0.167059535 | 0.818910005 | 0.878415459 | AL031709.1 |
| ENSG00000231466 | 3.632288727 | 4.310305609 | -0.246692015 | 0.819045376 | 0.878524396 | AL022324.2 |
| ENSG00000132855 | 1.509042109 | 1.069617038 | 0.493752865  | 0.8191425   | 1           | ANGPTL3    |
| ENSG00000143384 | 8587.158989 | 9120.102596 | -0.086854692 | 0.819195239 | 0.878648867 | MCL1       |
| ENSG00000165914 | 531.1139849 | 498.2561528 | 0.092741019  | 0.819360558 | 0.878789905 | TTC7B      |
| novel.948       | 3.856222538 | 4.801467703 | -0.32185283  | 0.819520911 | 0.878925606 | -          |
| ENSG00000231579 | 2.767681241 | 2.140389951 | 0.364604376  | 0.819789352 | 0.879177213 | RPL7P21    |
| ENSG00000164306 | 193.7925501 | 202.4037077 | -0.063129016 | 0.819904939 | 0.879261996 | PRIMPOL    |
| ENSG00000175471 | 177.7433119 | 188.2181041 | -0.08393074  | 0.819946718 | 0.879261996 | MCTP1      |
| ENSG00000123200 | 1456.978193 | 1415.20046  | 0.042000169  | 0.819969935 | 0.879261996 | ZC3H13     |
| ENSG00000286244 | 4.748552839 | 3.9336975   | 0.275631269  | 0.820007126 | 0.879265586 | AC073046.3 |
| ENSG00000164283 | 156.8616553 | 142.8560413 | 0.133733695  | 0.820096264 | 0.879324875 | ESM1       |
| ENSG00000287408 | 2.06654734  | 2.882993683 | -0.475023486 | 0.820220926 | 0.879387721 | AC027811.1 |
| ENSG00000287086 | 254.0261478 | 239.3482095 | 0.086875474  | 0.820222572 | 0.879387721 | AC034193.1 |
| ENSG00000278048 | 4.301867596 | 3.32212083  | 0.377098864  | 0.820412394 | 0.879554939 | RF00004    |
| ENSG00000275756 | 1.814890715 | 2.435565801 | -0.432149641 | 0.820475401 | 0.879586193 | AL354751.3 |
| ENSG00000236137 | 1.817398012 | 1.365948763 | 0.386380585  | 0.820527772 | 0.879606043 | AL445231.1 |
| ENSG00000105404 | 476.6672197 | 448.3968015 | 0.088748609  | 0.820717631 | 0.879773271 | RABAC1     |
| ENSG00000201302 | 7.864920557 | 6.899279318 | 0.19419446   | 0.820922804 | 0.879956901 | SNORA65    |
| ENSG00000278922 | 44.16900275 | 41.13015416 | 0.102945512  | 0.820973052 | 0.879959598 | AC002310.5 |
| ENSG00000270469 | 2.387511003 | 1.854670712 | 0.381469613  | 0.821025703 | 0.879959598 | AC006557.5 |
| ENSG00000287750 | 3.975889338 | 4.821536799 | -0.292138468 | 0.821026928 | 0.879959598 | AL353572.4 |
| ENSG00000213999 | 4.238900074 | 3.577158488 | 0.243249276  | 0.82119896  | 0.880107672 | MEF2B      |
| ENSG00000229108 | 7.667384642 | 6.176873076 | 0.301303822  | 0.821302939 | 0.880182802 | LINC02587  |
| ENSG00000011347 | 15.33978388 | 17.90444887 | -0.21971408  | 0.821544793 | 0.880405678 | SYT7       |
| ENSG00000074603 | 901.0458119 | 871.1327027 | 0.048939037  | 0.821648959 | 0.88048099  | DPP8       |
| ENSG00000168066 | 3606.165363 | 3457.532226 | 0.060689836  | 0.82184982  | 0.88065991  | SF1        |
| ENSG00000047578 | 462.3410582 | 485.3399705 | -0.069823347 | 0.822186571 | 0.880984422 | KIAA0556   |
| ENSG00000225981 | 2.96013129  | 2.0188195   | 0.542981252  | 0.822335013 | 0.881107142 | AC102953.1 |
| ENSG00000176933 | 2.727350667 | 3.342189926 | -0.279387407 | 0.822674272 | 0.881434297 | TOB2P1     |
| ENSG00000170260 | 299.1572864 | 287.9096664 | 0.056117474  | 0.82274312  | 0.881471711 | ZNF212     |
| ENSG00000282164 | 4.590093848 | 3.718798035 | 0.311603482  | 0.822825694 | 0.881523828 | PEG13      |
| ENSG00000236699 | 4.251507832 | 3.61729668  | 0.235622713  | 0.822932199 | 0.881601578 | ARHGEF38   |
| ENSG00000072786 | 1938.319217 | 1850.688606 | 0.066932478  | 0.823005054 | 0.881643273 | STK10      |
| ENSG00000184616 | 7.178901713 | 6.195657903 | 0.221028258  | 0.823069749 | 0.88166866  | SPDYE12P   |
| ENSG00000114631 | 363.8305394 | 380.7218087 | -0.06502457  | 0.823096622 | 0.88166866  | PODXL2     |
| ENSG00000232615 | 2.098031101 | 3.02822925  | -0.536116297 | 0.823142497 | 0.881681448 | AC026412.2 |
| ENSG00000207954 | 0.925067711 | 1.406086955 | -0.613421824 | 0.823172474 | 1           | MIR138-1   |
| ENSG00000229344 | 1.83125942  | 1.386017859 | 0.380935766  | 0.823222539 | 0.881730832 | MTCO2P12   |
| ENSG00000101350 | 1245.616891 | 1293.068362 | -0.053914447 | 0.823286192 | 0.881762658 | KIF3B      |
| ENSG00000198711 | 9.406700076 | 10.44575622 | -0.150436959 | 0.823402249 | 0.881832136 | SSBP3-AS1  |
| ENSG00000197670 | 16.24569085 | 18.43228153 | -0.176100517 | 0.823418946 | 0.881832136 | AL157838.1 |
| ENSG00000141425 | 1175.077085 | 1213.722512 | -0.046663606 | 0.823874041 | 0.882283148 | RPRD1A     |
| ENSG00000198590 | 19.43358817 | 17.4760626  | 0.158892982  | 0.823913747 | 0.882289302 | C3orf35    |
| ENSG00000164284 | 319.9089775 | 306.0374095 | 0.063645977  | 0.824010811 | 0.88235577  | GRPEL2     |
| ENSG00000075886 | 9.076889601 | 10.20145945 | -0.17527128  | 0.824057206 | 0.88235577  | TUBA3D     |
| ENSG00000248794 | 3.910414519 | 4.666844622 | -0.252986791 | 0.824077702 | 0.88235577  | AC026436.1 |
| novel.122       | 8.830318842 | 7.724471184 | 0.199927494  | 0.824307245 | 0.882565175 | -          |
| ENSG00000164976 | 116.4151891 | 125.4191238 | -0.108405043 | 0.824359804 | 0.882585077 | MYORG      |
| ENSG00000259083 | 3.016830569 | 3.647978261 | -0.265895541 | 0.824419918 | 0.882613066 | AL132639.3 |

|                 |             |             |              |             |             |            |
|-----------------|-------------|-------------|--------------|-------------|-------------|------------|
| ENSG00000286158 | 20.70100284 | 18.70854416 | 0.152877809  | 0.824664531 | 0.882838567 | AL034548.2 |
| novel.693       | 309.7897026 | 293.1119213 | 0.080341651  | 0.825003241 | 0.88316478  | -          |
| ENSG00000274024 | 2.962638588 | 2.221822211 | 0.427001158  | 0.825213579 | 0.883353549 | AL590282.1 |
| ENSG00000083807 | 106.9609647 | 100.99295   | 0.080743566  | 0.825296202 | 0.883405596 | SLC27A5    |
| ENSG00000283312 | 10.84142055 | 12.07735513 | -0.157537148 | 0.82541615  | 0.88349759  | AC017104.4 |
| ENSG00000083817 | 76.12809474 | 80.11315869 | -0.075798801 | 0.825483796 | 0.883498803 | ZNF416     |
| ENSG00000198064 | 6.62265013  | 5.819049794 | 0.19491601   | 0.825485295 | 0.883498803 | NPIPB13    |
| ENSG00000233225 | 20.65594241 | 22.27753031 | -0.109745722 | 0.825655195 | 0.883644242 | AC004987.2 |
| ENSG00000103888 | 7885.401361 | 6211.05068  | 0.34432586   | 0.825715817 | 0.883658913 | CEMIP      |
| ENSG00000185262 | 1459.737754 | 1526.360966 | -0.064158426 | 0.825736927 | 0.883658913 | UBALD2     |
| ENSG00000258044 | 1.186824798 | 1.782695063 | -0.584314539 | 0.825853234 | 0.883716202 | AC073569.1 |
| ENSG00000287496 | 5.088392504 | 4.33153058  | 0.238505998  | 0.825858489 | 0.883716202 | AC093227.3 |
| ENSG00000223692 | 1.480065645 | 1.049547942 | 0.491216033  | 0.82591993  | 1           | DIP2A-IT1  |
| ENSG00000138642 | 717.1530606 | 747.5734339 | -0.059855078 | 0.825926174 | 0.88374496  | HERC6      |
| ENSG00000182791 | 5.209312953 | 6.267761946 | -0.276312099 | 0.825953394 | 0.88374496  | CCDC87     |
| ENSG00000267649 | 3.605819561 | 2.913675265 | 0.314045038  | 0.826001658 | 0.883760206 | AC010327.5 |
| ENSG00000124222 | 2133.42671  | 2222.896387 | -0.059118782 | 0.826055774 | 0.883777055 | STX16      |
| ENSG00000261924 | 2.961384939 | 3.72941052  | -0.315276108 | 0.826085439 | 0.883777055 | AC127496.1 |
| ENSG00000176597 | 491.2372906 | 514.5363697 | -0.06643284  | 0.826288236 | 0.883896973 | B3GNT5     |
| ENSG00000253853 | 6.459176544 | 7.970180625 | -0.31034274  | 0.826289914 | 0.883896973 | AC246817.1 |
| ENSG00000149591 | 3315.652268 | 3769.739742 | -0.185215066 | 0.826299592 | 0.883896973 | TAGLN      |
| ENSG00000267581 | 2.052685933 | 1.386017859 | 0.56266901   | 0.826469015 | 0.884041809 | AC011477.4 |
| ENSG00000153558 | 321.6969718 | 308.3261987 | 0.061356529  | 0.826580911 | 0.884125099 | FBXL2      |
| ENSG00000105176 | 1142.938419 | 1186.511413 | -0.053879716 | 0.826798493 | 0.884321421 | URI1       |
| ENSG00000285664 | 7.755282947 | 8.876804751 | -0.193767802 | 0.827180037 | 0.88469309  | AL139317.5 |
| ENSG00000170681 | 13.74520857 | 15.71343664 | -0.191328576 | 0.827234843 | 0.884715286 | CAVIN4     |
| ENSG00000147124 | 216.6594518 | 207.92792   | 0.060495346  | 0.827578222 | 0.885046093 | ZNF41      |
| ENSG00000087077 | 2380.203435 | 2460.703564 | -0.04806069  | 0.827634102 | 0.885064961 | TRIP6      |
| ENSG00000120688 | 606.0671075 | 585.2340689 | 0.050852292  | 0.827678335 | 0.885064961 | WBP4       |
| ENSG00000170325 | 220.5190084 | 209.8573445 | 0.072228831  | 0.827698062 | 0.885064961 | PRDM10     |
| ENSG00000272196 | 4.777529303 | 4.065880437 | 0.248515218  | 0.827839387 | 0.885179649 | HIST2H2AA4 |
| ENSG00000214867 | 4.543495031 | 3.812127049 | 0.237119194  | 0.828074096 | 0.885358519 | SRSF9P1    |
| ENSG00000252690 | 11.2518209  | 12.41266917 | -0.147760833 | 0.828074825 | 0.885358519 | AC105339.2 |
| ENSG00000238711 | 1.233423615 | 0.713078025 | 0.786343085  | 0.828172115 | 1           | RNY4P25    |
| ENSG00000113302 | 1.233423615 | 0.713078025 | 0.786343085  | 0.828172115 | 1           | IL12B      |
| ENSG00000231439 | 1.233423615 | 0.713078025 | 0.786343085  | 0.828172115 | 1           | WASIR2     |
| ENSG00000171804 | 1.233423615 | 0.713078025 | 0.786343085  | 0.828172115 | 1           | WDR87      |
| ENSG00000272966 | 0.89358395  | 1.345879667 | -0.600487698 | 0.828540811 | 1           | AC064836.2 |
| ENSG00000243648 | 0.89358395  | 1.345879667 | -0.600487698 | 0.828540811 | 1           | AC109454.1 |
| ENSG00000225938 | 1.536764924 | 1.00940975  | 0.585787764  | 0.8285618   | 1           | AL109741.1 |
| ENSG00000275936 | 4.55610279  | 3.882946823 | 0.220823375  | 0.828567161 | 0.885848459 | AC004263.1 |
| ENSG00000184139 | 3.951998741 | 3.12857473  | 0.326487048  | 0.828630972 | 0.885880228 | RPL7AP28   |
| ENSG00000213731 | 1.17296339  | 0.672939833 | 0.790513608  | 0.828697533 | 1           | RAB5CP1    |
| ENSG00000234509 | 1.17296339  | 0.672939833 | 0.790513608  | 0.828697533 | 1           | AP000253.1 |
| ENSG00000212163 | 1.17296339  | 0.672939833 | 0.790513608  | 0.828697533 | 1           | SNORD91A   |
| ENSG00000254788 | 4.290584757 | 5.216929734 | -0.275571922 | 0.828755154 | 0.885976532 | CKLF-CMTM1 |
| ENSG00000226510 | 3.591958154 | 4.61596555  | -0.34697897  | 0.828842555 | 0.886032369 | UPK1A-AS1  |
| ENSG00000268047 | 2.682005499 | 3.311508345 | -0.289257351 | 0.828875591 | 0.886032369 | AC018766.1 |
| ENSG00000254004 | 392.7201197 | 380.2267122 | 0.047085475  | 0.829244185 | 0.886389911 | ZNF260     |
| ENSG00000271803 | 0.61420451  | 1.069617038 | -0.804597331 | 0.82927884  | 1           | AL121906.1 |
| ENSG00000165215 | 0.61420451  | 1.069617038 | -0.804597331 | 0.82927884  | 1           | CLDN3      |

|                 |             |             |              |             |             |            |
|-----------------|-------------|-------------|--------------|-------------|-------------|------------|
| ENSG00000253992 | 0.61420451  | 1.069617038 | -0.804597331 | 0.82927884  | 1           | AC103726.2 |
| ENSG00000252408 | 0.61420451  | 1.069617038 | -0.804597331 | 0.82927884  | 1           | RF00212    |
| ENSG00000115760 | 1546.477539 | 1490.964224 | 0.052876872  | 0.829293586 | 0.886406248 | BIRC6      |
| ENSG00000287740 | 1.22840902  | 0.713078025 | 0.780947645  | 0.829405302 | 1           | AC115485.1 |
| ENSG00000259100 | 1.22840902  | 0.713078025 | 0.780947645  | 0.829405302 | 1           | AL157791.1 |
| ENSG00000260571 | 1.22840902  | 0.713078025 | 0.780947645  | 0.829405302 | 1           | BNIP3P5    |
| ENSG00000254186 | 1.22840902  | 0.713078025 | 0.780947645  | 0.829405302 | 1           | AC113414.1 |
| ENSG00000272465 | 1.17296339  | 1.722487775 | -0.555105988 | 0.829421742 | 0.886495483 | AL031768.1 |
| ENSG00000234091 | 2.947523532 | 3.983292303 | -0.42939749  | 0.829445313 | 0.886495483 | AL157392.2 |
| ENSG00000260329 | 39.19218568 | 36.88121171 | 0.091237332  | 0.829533191 | 0.886552935 | AC007541.1 |
| ENSG00000252311 | 3.240764379 | 2.527610546 | 0.365962914  | 0.829694017 | 0.886688341 | RNU1-103P  |
| ENSG00000231982 | 7.294807567 | 8.327875513 | -0.202042819 | 0.829844924 | 0.886813136 | AC112907.2 |
| ENSG00000164855 | 14.28090323 | 16.32385743 | -0.188270177 | 0.829951866 | 0.88689094  | TMEM184A   |
| ENSG00000232729 | 8.924485391 | 10.36316809 | -0.213090229 | 0.829988355 | 0.886893455 | AC211433.1 |
| ENSG00000106785 | 668.0733112 | 696.4628374 | -0.059932699 | 0.830248331 | 0.887134768 | TRIM14     |
| ENSG00000268307 | 0.616711807 | 1.069617038 | -0.79956946  | 0.830294058 | 1           | LINC02560  |
| ENSG00000227482 | 0.616711807 | 1.069617038 | -0.79956946  | 0.830294058 | 1           | AL157702.2 |
| ENSG00000287041 | 0.616711807 | 1.069617038 | -0.79956946  | 0.830294058 | 1           | AC079354.3 |
| ENSG00000253257 | 0.616711807 | 1.069617038 | -0.79956946  | 0.830294058 | 1           | MTND4P7    |
| ENSG00000286113 | 0.616711807 | 1.069617038 | -0.79956946  | 0.830294058 | 1           | AC022868.2 |
| ENSG00000117501 | 0.616711807 | 1.069617038 | -0.79956946  | 0.830294058 | 1           | MROH9      |
| ENSG00000266171 | 1.803536605 | 1.436768536 | 0.331434415  | 0.830395066 | 0.887212183 | AP001020.3 |
| ENSG00000234136 | 1.759445085 | 1.069617038 | 0.719382185  | 0.830407941 | 0.887212183 | AC055764.1 |
| ENSG00000260281 | 3.045807032 | 2.415496705 | 0.317216939  | 0.830481399 | 0.887212183 | ITFG1-AS1  |
| ENSG00000225450 | 2.976499995 | 3.61729668  | -0.272235221 | 0.830484745 | 0.887212183 | AL021707.1 |
| ENSG00000231563 | 3.881438055 | 4.82025253  | -0.301731761 | 0.830491524 | 0.887212183 | AL139288.1 |
| ENSG00000280173 | 22.09943843 | 20.2092444  | 0.125216151  | 0.83052622  | 0.887212767 | AC104447.1 |
| ENSG00000155974 | 0.925067711 | 1.548882377 | -0.73747238  | 0.830678088 | 1           | GRIP1      |
| ENSG00000116786 | 1990.813988 | 2061.050367 | -0.049844278 | 0.830762312 | 0.887428486 | PLEKHM2    |
| ENSG00000267796 | 52.19836581 | 55.1117748  | -0.076319568 | 0.830991594 | 0.887636912 | LIN37      |
| ENSG00000163362 | 18.47878854 | 22.01200856 | -0.254374774 | 0.831038962 | 0.887651015 | INAVA      |
| ENSG00000197879 | 6344.251049 | 6094.797493 | 0.057881178  | 0.831290172 | 0.887871363 | MYO1C      |
| ENSG00000269907 | 3.020591515 | 2.323323566 | 0.398692473  | 0.831324691 | 0.887871363 | PTMAP11    |
| ENSG00000233820 | 6.635257889 | 5.819049794 | 0.196371244  | 0.831358324 | 0.887871363 | AL589843.2 |
| ENSG00000287100 | 6.685617652 | 7.866110731 | -0.225010055 | 0.831381953 | 0.887871363 | AL078600.1 |
| ENSG00000275342 | 32.81674705 | 37.14215714 | -0.179932551 | 0.831438314 | 0.887895057 | PRAG1      |
| ENSG00000286009 | 2.760088077 | 3.72123818  | -0.441147626 | 0.831476138 | 0.887898954 | AC244213.1 |
| ENSG00000272832 | 1.539272221 | 1.130980201 | 0.459391067  | 0.831623318 | 1           | AC022296.3 |
| ENSG00000224505 | 5.687481958 | 6.674923242 | -0.217208278 | 0.831794242 | 0.888202137 | AC138150.1 |
| ENSG00000106608 | 916.3735727 | 885.7888989 | 0.049263826  | 0.831880053 | 0.88825726  | URGCP      |
| ENSG00000266340 | 1.538018572 | 1.130980201 | 0.458436318  | 0.831965974 | 1           | AC138207.7 |
| ENSG00000137707 | 1.83125942  | 1.467450118 | 0.328786028  | 0.832046458 | 0.888398431 | BTG4       |
| ENSG00000215041 | 584.1811895 | 560.9521372 | 0.058897717  | 0.832254208 | 0.888562177 | NEURL4     |
| ENSG00000249352 | 1.521649867 | 1.00940975  | 0.573165355  | 0.832260428 | 1           | LINC02198  |
| ENSG00000137845 | 3614.706514 | 3488.769062 | 0.051132577  | 0.832268218 | 0.888562177 | ADAM10     |
| ENSG00000077097 | 2418.448685 | 2481.273743 | -0.036967147 | 0.832394231 | 0.888660195 | TOP2B      |
| ENSG00000230568 | 3.975889338 | 4.697526203 | -0.241884552 | 0.832677465 | 0.888926047 | SF3A3P1    |
| ENSG00000144741 | 106.7981322 | 114.661543  | -0.102757072 | 0.832731546 | 0.888947255 | SLC25A26   |
| ENSG00000285329 | 1.846374476 | 1.41669944  | 0.370616402  | 0.832872522 | 0.889061219 | AC025283.3 |
| ENSG00000251155 | 1.817398012 | 1.406086955 | 0.358980615  | 0.833259298 | 0.889437544 | SEPT14P4   |
| ENSG00000165389 | 1201.351815 | 1159.472883 | 0.051013433  | 0.833377721 | 0.889527406 | SPTSSA     |



|                 |             |             |              |             |             |            |
|-----------------|-------------|-------------|--------------|-------------|-------------|------------|
| ENSG00000218586 | 0.925067711 | 1.365948763 | -0.577660577 | 0.833566598 | 1           | AC006971.1 |
| ENSG00000249870 | 0.907445357 | 1.345879667 | -0.58222797  | 0.833636673 | 1           | AC005920.2 |
| ENSG00000276166 | 14.07459177 | 15.7747998  | -0.156560572 | 0.833766106 | 0.889905398 | AC092118.2 |
| ENSG00000134297 | 76.56997885 | 71.55763505 | 0.094592179  | 0.833851727 | 0.889960224 | PLEKHA8P1  |
| ENSG00000067064 | 851.5430561 | 884.1054056 | -0.054455763 | 0.833960931 | 0.890040213 | IDI1       |
| ENSG00000163623 | 62.45534089 | 54.03714908 | 0.209361968  | 0.834023841 | 0.890070791 | NKX6-1     |
| ENSG00000114113 | 2.682005499 | 2.120320855 | 0.337908523  | 0.834108354 | 0.890124421 | RBP2       |
| ENSG00000125657 | 18.2948293  | 21.37347472 | -0.228486259 | 0.834361467 | 0.890357961 | TNFSF9     |
| ENSG00000267551 | 0.586481695 | 1.00940975  | -0.786604141 | 0.834591677 | 1           | AC005264.1 |
| ENSG00000270259 | 0.586481695 | 1.00940975  | -0.786604141 | 0.834591677 | 1           | BX255925.2 |
| ENSG00000241735 | 0.586481695 | 1.00940975  | -0.786604141 | 0.834591677 | 1           | FABP5P3    |
| ENSG00000004799 | 925.3198148 | 1030.056355 | -0.154829168 | 0.834695492 | 0.89067782  | PKD4       |
| ENSG00000273113 | 3.047060681 | 2.537067156 | 0.266336818  | 0.834860443 | 0.890817248 | AC133528.1 |
| ENSG00000135338 | 139.1870418 | 144.8807558 | -0.05781065  | 0.83508487  | 0.891020123 | LCA5       |
| ENSG00000141741 | 426.3017229 | 440.930531  | -0.04831337  | 0.835212319 | 0.891119513 | MIEN1      |
| ENSG00000225969 | 7.465803046 | 6.319668499 | 0.237528906  | 0.835359541 | 0.89123999  | ABHD11-AS1 |
| ENSG00000109390 | 657.8098819 | 684.9887707 | -0.058780464 | 0.835650585 | 0.89150675  | NDUFC1     |
| ENSG00000146072 | 1321.81309  | 1477.157234 | -0.160254979 | 0.835694776 | 0.89150675  | TNFRSF21   |
| ENSG00000286004 | 11.08046942 | 12.45267897 | -0.159428817 | 0.835712516 | 0.89150675  | AC124944.3 |
| ENSG00000150756 | 239.8934887 | 249.3264684 | -0.05581174  | 0.835820128 | 0.891584938 | ATPCKMT    |
| ENSG00000267191 | 5.101000263 | 4.350443801 | 0.235479502  | 0.835960774 | 0.891698356 | AC006213.3 |
| ENSG00000172828 | 11.94256961 | 10.58739577 | 0.181007843  | 0.836112731 | 0.891792845 | CES3       |
| ENSG00000236021 | 4.193554905 | 3.597227584 | 0.226319772  | 0.836118006 | 0.891792845 | AL591043.2 |
| ENSG00000146676 | 1434.109782 | 1474.528535 | -0.040026851 | 0.836216309 | 0.891846815 | PURB       |
| ENSG00000099834 | 2.06654734  | 1.426156051 | 0.536435722  | 0.83625898  | 0.891846815 | CDHR5      |
| ENSG00000244476 | 3.021845164 | 2.395427609 | 0.318067355  | 0.836271588 | 0.891846815 | ERVFRD-1   |
| ENSG00000141040 | 198.6646732 | 191.1087565 | 0.055878262  | 0.836893936 | 0.892473889 | ZNF287     |
| ENSG00000266405 | 11.53370764 | 12.58614618 | -0.126070448 | 0.837098818 | 0.892638754 | AP005061.1 |
| ENSG00000146414 | 145.2454203 | 152.2618218 | -0.067425932 | 0.837117249 | 0.892638754 | SHPRH      |
| ENSG00000166435 | 174.1946189 | 187.4159225 | -0.104815268 | 0.837160509 | 0.892648247 | XRRA1      |
| ENSG00000174599 | 68.2878915  | 64.10570208 | 0.089749895  | 0.837293939 | 0.892753881 | TRAM1L1    |
| ENSG00000253392 | 5.744181236 | 6.654854146 | -0.201580796 | 0.837401731 | 0.892823516 | AC119403.1 |
| ENSG00000259116 | 10.98003463 | 9.619408483 | 0.18724967   | 0.837427977 | 0.892823516 | AL049869.3 |
| ENSG00000258001 | 1.493927053 | 2.139234076 | -0.51702903  | 0.837620807 | 0.892974371 | AC126614.1 |
| ENSG00000078304 | 1749.158187 | 1795.765454 | -0.037880752 | 0.837638212 | 0.892974371 | PPP2R5C    |
| ENSG00000117245 | 34.33177267 | 31.90498274 | 0.110082225  | 0.837874928 | 0.893190075 | KIF17      |
| ENSG00000200059 | 1.816144364 | 1.406086955 | 0.358785944  | 0.837913378 | 0.893194415 | RF00019    |
| ENSG00000118017 | 1.850135422 | 1.161661783 | 0.682170133  | 0.83798408  | 0.893233133 | A4GNT      |
| ENSG00000240522 | 9.58278142  | 8.488299887 | 0.185938707  | 0.838046973 | 0.893263524 | RPL7AP10   |
| ENSG00000223725 | 1.802282956 | 1.396630344 | 0.357945404  | 0.838143208 | 0.893329451 | AC009226.1 |
| ENSG00000203799 | 19.98887084 | 18.41336831 | 0.126122097  | 0.838410949 | 0.893578162 | CCDC162P   |
| ENSG00000223496 | 856.963338  | 884.4921126 | -0.045981063 | 0.838526308 | 0.893664452 | EXOSC6     |
| ENSG00000185697 | 269.9036636 | 279.2617597 | -0.049747111 | 0.838787314 | 0.893905952 | MYBL1      |
| ENSG00000075303 | 308.1696979 | 295.1148622 | 0.061828797  | 0.838933049 | 0.894022542 | SLC25A40   |
| ENSG00000128891 | 161.4426458 | 167.6255262 | -0.053063355 | 0.838965536 | 0.894022542 | CCDC32     |
| ENSG00000259475 | 1.774560141 | 2.375358513 | -0.427117997 | 0.839021359 | 0.894045358 | AC036108.1 |
| ENSG00000198134 | 0.922560414 | 1.345879667 | -0.562495331 | 0.83915483  | 1           | PTMAP9     |
| ENSG00000234782 | 3.677633896 | 4.290236513 | -0.228615442 | 0.839296509 | 0.894301875 | TPT1P9     |
| ENSG00000236274 | 1.511549406 | 1.130980201 | 0.437994798  | 0.839309804 | 1           | AC004865.1 |
| ENSG00000166323 | 16.43724326 | 14.83762249 | 0.141686976  | 0.83949554  | 0.894441611 | C11orf65   |
| ENSG00000129521 | 24.86858678 | 21.77562733 | 0.19350147   | 0.839514979 | 0.894441611 | EGLN3      |

|                 |             |             |              |             |             |            |
|-----------------|-------------|-------------|--------------|-------------|-------------|------------|
| ENSG00000286219 | 15.83557524 | 17.5257858  | -0.148572825 | 0.839530931 | 0.894441611 | AC242843.1 |
| ENSG00000112053 | 5.379126054 | 6.24640858  | -0.203266991 | 0.839576766 | 0.894453765 | SLC26A8    |
| ENSG00000215450 | 0.923814062 | 1.345879667 | -0.560879412 | 0.839607087 | 1           | AL022342.1 |
| ENSG00000236714 | 8.866817198 | 7.878007486 | 0.16675426   | 0.839763795 | 0.89461166  | LINC01844  |
| ENSG00000259118 | 6.617635535 | 7.916989803 | -0.257268769 | 0.83979384  | 0.89461166  | AL139022.1 |
| ENSG00000126226 | 1357.575252 | 1288.193335 | 0.075665805  | 0.840212565 | 0.895021019 | PCID2      |
| ENSG00000230646 | 1.50778846  | 1.130980201 | 0.435105585  | 0.840349813 | 1           | KLF2P2     |
| ENSG00000248746 | 3.660011542 | 4.270167417 | -0.228616265 | 0.840442964 | 0.895200546 | ACTN3      |
| ENSG00000275481 | 8.290435964 | 7.031590649 | 0.230276014  | 0.840450011 | 0.895200546 | AC025031.4 |
| novel.713       | 4.285498891 | 3.557089392 | 0.263041866  | 0.840554574 | 0.895275218 | -          |
| ENSG00000228791 | 1.847628125 | 1.436768536 | 0.357454869  | 0.840711567 | 0.895374447 | THRB-AS1   |
| ENSG00000246575 | 22.23798123 | 20.1252436  | 0.146885617  | 0.840716663 | 0.895374447 | AC093162.2 |
| ENSG00000287218 | 0.615458159 | 0.387220594 | 0.667244864  | 0.840791035 | 1           | AL359962.3 |
| ENSG00000254177 | 0.615458159 | 0.387220594 | 0.667244864  | 0.840791035 | 1           | AC079209.2 |
| ENSG00000287643 | 0.615458159 | 0.387220594 | 0.667244864  | 0.840791035 | 1           | AC004825.3 |
| ENSG00000284035 | 0.615458159 | 0.387220594 | 0.667244864  | 0.840791035 | 1           | MIR5187    |
| ENSG00000248751 | 0.615458159 | 0.387220594 | 0.667244864  | 0.840791035 | 1           | AC004997.1 |
| ENSG00000246250 | 8.064892499 | 9.413965627 | -0.219196839 | 0.840886086 | 0.895518175 | AC087521.2 |
| ENSG00000201900 | 2.72484337  | 3.189937893 | -0.233626326 | 0.8410055   | 0.895608636 | RNY1P13    |
| ENSG00000159184 | 1.84261353  | 2.587817834 | -0.488212103 | 0.841048329 | 0.895617535 | HOXB13     |
| ENSG00000114374 | 625.7876403 | 405.5437984 | 0.625742322  | 0.841135438 | 0.895655389 | USP9Y      |
| ENSG00000274460 | 4.443957882 | 3.647978261 | 0.293316041  | 0.841152823 | 0.895655389 | AC092119.2 |
| ENSG00000259797 | 1.803536605 | 1.406086955 | 0.351109557  | 0.841258124 | 0.895730803 | AC020978.1 |
| ENSG00000162390 | 44.56887571 | 41.31809646 | 0.107114737  | 0.84145716  | 0.89590601  | ACOT11     |
| ENSG00000230310 | 4.528379975 | 3.953766596 | 0.197603922  | 0.84156653  | 0.89598574  | AC010422.1 |
| ENSG00000270178 | 1.81990531  | 1.41669944  | 0.354724553  | 0.841689425 | 0.896079861 | AC007687.1 |
| ENSG00000130749 | 742.4307808 | 767.9894994 | -0.048947453 | 0.841745215 | 0.896102537 | AC008755.1 |
| ENSG00000251991 | 2.682005499 | 2.11916498  | 0.33753429   | 0.841820728 | 0.896146207 | RNU7-49P   |
| ENSG00000236618 | 16.06459491 | 14.7477611  | 0.124088613  | 0.84196703  | 0.896265228 | PITPNA-AS1 |
| ENSG00000285053 | 37.17606938 | 39.37009673 | -0.085752972 | 0.842029353 | 0.896279582 | TBCE       |
| ENSG00000229723 | 1.22840902  | 1.742556871 | -0.513349883 | 0.842059077 | 0.896279582 | LINC01054  |
| ENSG00000166526 | 440.4451673 | 457.1709484 | -0.053427509 | 0.842084007 | 0.896279582 | ZNF3       |
| ENSG00000287820 | 0.615458159 | 0.356539013 | 0.667322256  | 0.842092103 | 1           | AL050338.2 |
| ENSG00000204961 | 0.615458159 | 0.356539013 | 0.667322256  | 0.842092103 | 1           | PCDHA9     |
| ENSG00000237009 | 0.615458159 | 0.356539013 | 0.667322256  | 0.842092103 | 1           | GLIS3-AS1  |
| ENSG00000240687 | 0.615458159 | 0.356539013 | 0.667322256  | 0.842092103 | 1           | AC082651.1 |
| ENSG00000273444 | 0.615458159 | 0.356539013 | 0.667322256  | 0.842092103 | 1           | AC006023.2 |
| ENSG00000228139 | 0.615458159 | 0.356539013 | 0.667322256  | 0.842092103 | 1           | LINC01402  |
| ENSG00000171435 | 0.615458159 | 0.356539013 | 0.667322256  | 0.842092103 | 1           | KSR2       |
| ENSG00000284731 | 0.615458159 | 0.356539013 | 0.667322256  | 0.842092103 | 1           | AC083906.5 |
| ENSG00000235683 | 0.615458159 | 0.356539013 | 0.667322256  | 0.842092103 | 1           | AC018442.1 |
| ENSG00000088836 | 69.14694206 | 61.84027405 | 0.159824731  | 0.84215826  | 0.896321893 | SLC4A11    |
| ENSG00000100056 | 423.8235654 | 438.0803207 | -0.047743993 | 0.842256585 | 0.896389822 | ESS2       |
| ENSG00000238061 | 0.879722543 | 1.426156051 | -0.692878237 | 0.842298352 | 1           | AL356273.2 |
| ENSG00000257246 | 0.879722543 | 1.426156051 | -0.692878237 | 0.842298352 | 1           | PHBP19     |
| ENSG00000092531 | 230.9197547 | 241.1565299 | -0.062058889 | 0.842717838 | 0.896843982 | SNAP23     |
| ENSG00000267295 | 0.615458159 | 0.336469917 | 0.667373628  | 0.842963376 | 1           | AC025048.3 |
| ENSG00000271676 | 0.615458159 | 0.336469917 | 0.667373628  | 0.842963376 | 1           | AC104771.1 |
| ENSG00000277541 | 0.615458159 | 0.336469917 | 0.667373628  | 0.842963376 | 1           | ZNF630-AS1 |
| ENSG00000253708 | 0.615458159 | 0.336469917 | 0.667373628  | 0.842963376 | 1           | AC026979.1 |
| ENSG00000259181 | 0.615458159 | 0.336469917 | 0.667373628  | 0.842963376 | 1           | AC114546.1 |

|                 |             |             |              |             |             |              |
|-----------------|-------------|-------------|--------------|-------------|-------------|--------------|
| ENSG00000259674 | 0.615458159 | 0.336469917 | 0.667373628  | 0.842963376 | 1           | AC092868.1   |
| ENSG00000221066 | 0.615458159 | 0.336469917 | 0.667373628  | 0.842963376 | 1           | SNORD111     |
| ENSG00000262298 | 0.615458159 | 0.336469917 | 0.667373628  | 0.842963376 | 1           | AC004584.1   |
| ENSG00000286230 | 2.081662396 | 2.578361223 | -0.291170987 | 0.843034843 | 0.897138039 | AC010327.7   |
| ENSG00000177112 | 1.54052587  | 2.038888596 | -0.421820134 | 0.843063208 | 0.897138039 | MRV11-AS1    |
| ENSG00000119408 | 2223.764862 | 2138.048795 | 0.056865814  | 0.843156985 | 0.897201083 | NEK6         |
| ENSG00000233221 | 2.737451129 | 2.200597239 | 0.321115755  | 0.843217618 | 0.897228854 | AC133785.1   |
| ENSG00000283265 | 1.17296339  | 0.713078025 | 0.719833633  | 0.843327637 | 1           | AL356234.3   |
| ENSG00000281593 | 1.17296339  | 0.713078025 | 0.719833633  | 0.843327637 | 1           | AC006978.2   |
| ENSG00000266371 | 1.17296339  | 0.713078025 | 0.719833633  | 0.843327637 | 1           | AC079915.1   |
| ENSG00000275562 | 1.17296339  | 0.713078025 | 0.719833633  | 0.843327637 | 1           | AC104763.3   |
| ENSG00000280302 | 1.17296339  | 0.713078025 | 0.719833633  | 0.843327637 | 1           | AP005264.7   |
| ENSG00000237827 | 1.17296339  | 0.713078025 | 0.719833633  | 0.843327637 | 1           | RPS15AP29    |
| ENSG00000248919 | 1.480065645 | 1.10029862  | 0.441304725  | 0.84334878  | 1           | ATP5MF-PTCD1 |
| ENSG00000136783 | 519.0608637 | 545.5578239 | -0.072413758 | 0.843461915 | 0.897452044 | NIPSNAP3A    |
| ENSG00000092330 | 35.67426443 | 38.92814425 | -0.121172117 | 0.843544567 | 0.897498405 | AL096870.1   |
| ENSG00000230750 | 1.233423615 | 1.742556871 | -0.508369056 | 0.843574576 | 0.897498405 | SDAD1P2      |
| ENSG00000238025 | 1.538018572 | 1.069617038 | 0.518612244  | 0.843629975 | 1           | ZDHHC4P1     |
| novel.896       | 7.235600991 | 6.338453325 | 0.203990822  | 0.843667807 | 0.89756084  | -            |
| ENSG00000117408 | 955.850877  | 926.5737344 | 0.044888708  | 0.844081985 | 0.897955713 | IPO13        |
| ENSG00000270890 | 9.654595755 | 10.62997411 | -0.142504691 | 0.844108093 | 0.897955713 | AL049844.2   |
| ENSG00000136238 | 6023.125345 | 6177.554644 | -0.036497789 | 0.844210895 | 0.898012842 | RAC1         |
| ENSG00000205323 | 8.675336063 | 9.722065713 | -0.159429372 | 0.844264034 | 0.898012842 | SARNP        |
| ENSG00000239704 | 19.85408898 | 18.11819246 | 0.140093377  | 0.844265489 | 0.898012842 | CDRT4        |
| ENSG00000158077 | 3.337794231 | 4.228744955 | -0.329246763 | 0.844649021 | 0.89838401  | NLRP14       |
| ENSG00000161513 | 657.3441648 | 625.1077165 | 0.072157974  | 0.845022099 | 0.898744029 | FDXR         |
| ENSG00000266993 | 13.26166896 | 12.14701903 | 0.126129313  | 0.845096816 | 0.898786704 | AL050343.1   |
| ENSG00000232316 | 2.45681804  | 1.742556871 | 0.487890502  | 0.845138041 | 0.898793755 | LINC02518    |
| novel.213       | 6.036168435 | 5.238154706 | 0.218899217  | 0.845238867 | 0.898864189 | -            |
| ENSG00000126803 | 519.4255918 | 475.2034612 | 0.127951861  | 0.845518252 | 0.899124497 | HSPA2        |
| novel.858       | 11.68869042 | 13.88114677 | -0.247706743 | 0.845622485 | 0.899171792 | -            |
| ENSG00000241057 | 12.10883523 | 13.42439067 | -0.152692425 | 0.845656393 | 0.899171792 | AC004951.3   |
| ENSG00000286846 | 2.683259148 | 3.250145181 | -0.269395831 | 0.845666554 | 0.899171792 | Z93943.1     |
| ENSG00000169885 | 12.25468646 | 10.71269064 | 0.187931475  | 0.84570452  | 0.899175362 | CALML6       |
| ENSG00000237714 | 2.095523804 | 2.679862578 | -0.33367729  | 0.845780917 | 0.89921979  | P4HA2-AS1    |
| ENSG00000137142 | 2.155984028 | 2.751966622 | -0.365806215 | 0.845888249 | 0.899285081 | IGFBPL1      |
| ENSG00000200788 | 1.466204238 | 1.080229524 | 0.449674483  | 0.845890106 | 1           | RF00019      |
| ENSG00000229848 | 2.962638588 | 3.781445468 | -0.355705805 | 0.845911554 | 0.899285081 | AC139149.1   |
| ENSG00000274695 | 0.61420451  | 1.00940975  | -0.729643343 | 0.846020472 | 1           | AC108704.1   |
| ENSG00000257904 | 0.61420451  | 1.00940975  | -0.729643343 | 0.846020472 | 1           | AL133372.3   |
| ENSG00000011132 | 409.3902145 | 423.7218695 | -0.048914718 | 0.846068612 | 0.899415245 | AC005954.1   |
| ENSG00000159692 | 1925.040522 | 1976.401882 | -0.037923589 | 0.846122185 | 0.899435395 | CTBP1        |
| ENSG00000176771 | 97.31800779 | 107.450452  | -0.14445895  | 0.846210532 | 0.899444253 | NCKAP5       |
| ENSG00000223773 | 70.71970749 | 73.98588041 | -0.065826654 | 0.846216855 | 0.899444253 | CD99P1       |
| ENSG00000178917 | 6.888168163 | 7.980664717 | -0.207072448 | 0.846240871 | 0.899444253 | ZNF852       |
| ENSG00000269940 | 22.92504026 | 21.50308912 | 0.093067856  | 0.846268995 | 0.899444253 | AL049840.3   |
| ENSG00000115307 | 2183.865359 | 2117.721174 | 0.044353287  | 0.846555896 | 0.899688718 | AUP1         |
| ENSG00000181819 | 9.570173662 | 10.66065569 | -0.155122156 | 0.846568265 | 0.899688718 | KCTD9P2      |
| ENSG00000234383 | 8.443809089 | 9.364370825 | -0.146630988 | 0.846769305 | 0.899865564 | CTBP2P8      |
| ENSG00000108813 | 1.803536605 | 1.345879667 | 0.401142426  | 0.846903921 | 0.89993597  | DLX4         |
| ENSG00000258384 | 4.470427048 | 5.208757394 | -0.225853887 | 0.846904833 | 0.89993597  | AC068831.1   |

|                 |             |             |              |             |             |            |
|-----------------|-------------|-------------|--------------|-------------|-------------|------------|
| ENSG00000171564 | 0.616711807 | 1.00940975  | -0.724608354 | 0.847034739 | 1           | FGB        |
| ENSG00000277371 | 0.616711807 | 1.00940975  | -0.724608354 | 0.847034739 | 1           | RF00017    |
| ENSG00000133636 | 1.54052587  | 1.069617038 | 0.520965711  | 0.847123312 | 1           | NTS        |
| ENSG00000181704 | 1053.555267 | 1087.01552  | -0.044808241 | 0.847255691 | 0.900271977 | YIPF6      |
| novel.986       | 24.06777354 | 22.35079022 | 0.104775112  | 0.847392783 | 0.900380823 | -          |
| ENSG00000236471 | 0.601596751 | 0.387220594 | 0.640612648  | 0.847419204 | 1           | AF127577.5 |
| ENSG00000214773 | 0.601596751 | 0.387220594 | 0.640612648  | 0.847419204 | 1           | AC112512.1 |
| ENSG00000205414 | 0.601596751 | 0.387220594 | 0.640612648  | 0.847419204 | 1           | AC007608.1 |
| ENSG00000266968 | 0.601596751 | 0.387220594 | 0.640612648  | 0.847419204 | 1           | AC023421.1 |
| ENSG00000205572 | 0.601596751 | 0.387220594 | 0.640612648  | 0.847419204 | 1           | SERF1B     |
| ENSG00000134551 | 0.601596751 | 0.387220594 | 0.640612648  | 0.847419204 | 1           | PRH2       |
| ENSG00000199032 | 0.601596751 | 0.387220594 | 0.640612648  | 0.847419204 | 1           | MIR425     |
| ENSG00000259564 | 0.601596751 | 0.387220594 | 0.640612648  | 0.847419204 | 1           | AC009554.1 |
| ENSG00000285938 | 18.04922746 | 19.93999824 | -0.140669603 | 0.847508125 | 0.900466552 | AC072022.2 |
| ENSG00000287815 | 3.978396636 | 3.067083173 | 0.38538917   | 0.847732074 | 0.900666977 | AC005081.1 |
| ENSG00000228649 | 159.6484701 | 147.8833936 | 0.111609838  | 0.847766095 | 0.900666977 | SNHG26     |
| ENSG00000229808 | 5.463548147 | 4.737664395 | 0.210220115  | 0.848002499 | 0.90081025  | AL391825.1 |
| ENSG00000231212 | 0.600343103 | 0.387220594 | 0.638209624  | 0.848016961 | 1           | AL590399.3 |
| ENSG00000285567 | 0.600343103 | 0.387220594 | 0.638209624  | 0.848016961 | 1           | AC074051.5 |
| ENSG00000201448 | 0.600343103 | 0.387220594 | 0.638209624  | 0.848016961 | 1           | SNORA63C   |
| ENSG00000214812 | 0.600343103 | 0.387220594 | 0.638209624  | 0.848016961 | 1           | AL137792.1 |
| ENSG00000187988 | 0.600343103 | 0.387220594 | 0.638209624  | 0.848016961 | 1           | KCTD9P3    |
| ENSG00000212535 | 0.600343103 | 0.387220594 | 0.638209624  | 0.848016961 | 1           | RNU6-808P  |
| ENSG00000233148 | 0.600343103 | 0.387220594 | 0.638209624  | 0.848016961 | 1           | SYF2P2     |
| ENSG00000251630 | 0.600343103 | 0.387220594 | 0.638209624  | 0.848016961 | 1           | AC119751.6 |
| ENSG00000136275 | 0.600343103 | 0.387220594 | 0.638209624  | 0.848016961 | 1           | C7orf69    |
| ENSG00000222018 | 0.600343103 | 0.387220594 | 0.638209624  | 0.848016961 | 1           | FAM243A    |
| ENSG00000060491 | 1486.504445 | 1530.560352 | -0.042060579 | 0.848032293 | 0.90081025  | OGFR       |
| ENSG00000146833 | 608.8610278 | 630.5159837 | -0.050242338 | 0.848033097 | 0.90081025  | TRIM4      |
| ENSG00000189212 | 1.233423615 | 1.722487775 | -0.493837979 | 0.84803964  | 0.90081025  | DPY19L2P1  |
| ENSG00000179134 | 2685.139799 | 2800.236218 | -0.060455066 | 0.848153728 | 0.900894604 | SAMD4B     |
| ENSG00000240489 | 20.93030726 | 22.43093821 | -0.097456652 | 0.848237758 | 0.900947025 | SETP14     |
| ENSG00000230319 | 4.134348329 | 5.127325134 | -0.314305213 | 0.848274591 | 0.900949315 | AL022476.1 |
| ENSG00000124549 | 115.9732771 | 121.4270984 | -0.064442555 | 0.848383553 | 0.901001263 | BTN2A3P    |
| ENSG00000147059 | 6.772547043 | 5.706935953 | 0.242719802  | 0.848392861 | 0.901001263 | SPIN2A     |
| ENSG00000250770 | 2.125753916 | 2.679862578 | -0.315870202 | 0.848549857 | 0.901131116 | AC005865.2 |
| ENSG00000167113 | 835.0998445 | 859.7145244 | -0.041806945 | 0.848689629 | 0.901242756 | COQ4       |
| ENSG00000243089 | 0.601596751 | 0.356539013 | 0.640581262  | 0.848714258 | 1           | AC107029.1 |
| ENSG00000249319 | 0.601596751 | 0.356539013 | 0.640581262  | 0.848714258 | 1           | AC068533.4 |
| ENSG00000287712 | 0.601596751 | 0.356539013 | 0.640581262  | 0.848714258 | 1           | AC005865.3 |
| ENSG00000225761 | 0.601596751 | 0.356539013 | 0.640581262  | 0.848714258 | 1           | AL596247.1 |
| ENSG00000270553 | 0.601596751 | 0.356539013 | 0.640581262  | 0.848714258 | 1           | AC011921.3 |
| ENSG00000267091 | 0.601596751 | 0.356539013 | 0.640581262  | 0.848714258 | 1           | CTBP2P7    |
| ENSG00000267672 | 0.601596751 | 0.356539013 | 0.640581262  | 0.848714258 | 1           | AC010632.2 |
| ENSG00000198077 | 0.601596751 | 0.356539013 | 0.640581262  | 0.848714258 | 1           | CYP2A7     |
| ENSG00000286410 | 0.601596751 | 0.356539013 | 0.640581262  | 0.848714258 | 1           | AC089985.1 |
| ENSG00000279557 | 0.601596751 | 0.356539013 | 0.640581262  | 0.848714258 | 1           | AC010435.1 |
| ENSG00000229105 | 0.601596751 | 0.356539013 | 0.640581262  | 0.848714258 | 1           | ASTN2-AS1  |
| ENSG00000237025 | 0.601596751 | 0.356539013 | 0.640581262  | 0.848714258 | 1           | AL121601.2 |
| ENSG00000258413 | 0.601596751 | 0.356539013 | 0.640581262  | 0.848714258 | 1           | AL158801.2 |
| ENSG00000285788 | 0.601596751 | 0.356539013 | 0.640581262  | 0.848714258 | 1           | AC099782.2 |

|                 |             |             |              |             |             |            |
|-----------------|-------------|-------------|--------------|-------------|-------------|------------|
| ENSG00000241991 | 0.601596751 | 0.356539013 | 0.640581262  | 0.848714258 | 1           | AC114982.2 |
| ENSG00000180662 | 0.601596751 | 0.356539013 | 0.640581262  | 0.848714258 | 1           | RPL21P8    |
| ENSG00000237605 | 1.200686205 | 1.682349583 | -0.497141316 | 0.84892272  | 0.901453435 | AL591846.2 |
| ENSG00000065491 | 239.2131686 | 231.7809987 | 0.044973225  | 0.849034051 | 0.901534808 | TBC1D22B   |
| ENSG00000160172 | 39.80158906 | 37.64388454 | 0.082098053  | 0.849280228 | 0.901759352 | FAM86C2P   |
| novel.47        | 0.600343103 | 0.356539013 | 0.638167645  | 0.849311584 | 1           | -          |
| ENSG00000225675 | 0.600343103 | 0.356539013 | 0.638167645  | 0.849311584 | 1           | LINC01771  |
| ENSG00000239820 | 0.600343103 | 0.356539013 | 0.638167645  | 0.849311584 | 1           | RN7SL213P  |
| ENSG00000170890 | 0.600343103 | 0.356539013 | 0.638167645  | 0.849311584 | 1           | PLA2G1B    |
| ENSG00000278281 | 0.600343103 | 0.356539013 | 0.638167645  | 0.849311584 | 1           | MIR7856    |
| ENSG00000273090 | 0.600343103 | 0.356539013 | 0.638167645  | 0.849311584 | 1           | AC007378.1 |
| ENSG00000273258 | 0.600343103 | 0.356539013 | 0.638167645  | 0.849311584 | 1           | AC016737.2 |
| ENSG00000229433 | 0.600343103 | 0.356539013 | 0.638167645  | 0.849311584 | 1           | LINC02069  |
| ENSG00000240915 | 0.600343103 | 0.356539013 | 0.638167645  | 0.849311584 | 1           | AC120042.1 |
| ENSG00000261832 | 0.600343103 | 0.356539013 | 0.638167645  | 0.849311584 | 1           | AC138894.1 |
| ENSG00000196166 | 0.600343103 | 0.356539013 | 0.638167645  | 0.849311584 | 1           | C8orf86    |
| ENSG00000288027 | 0.600343103 | 0.356539013 | 0.638167645  | 0.849311584 | 1           | AL357037.1 |
| ENSG00000213050 | 0.600343103 | 0.356539013 | 0.638167645  | 0.849311584 | 1           | TPM3P1     |
| ENSG00000244217 | 0.600343103 | 0.356539013 | 0.638167645  | 0.849311584 | 1           | RPS4XP10   |
| ENSG00000212961 | 0.600343103 | 0.356539013 | 0.638167645  | 0.849311584 | 1           | HNRNPA1P40 |
| ENSG00000261158 | 0.600343103 | 0.356539013 | 0.638167645  | 0.849311584 | 1           | AC109597.2 |
| ENSG00000279495 | 38.29136458 | 36.24853847 | 0.077985681  | 0.849443475 | 0.901874526 | AL928654.4 |
| ENSG00000104133 | 1007.898578 | 1039.578108 | -0.04446139  | 0.849458124 | 0.901874526 | SPG11      |
| ENSG00000235946 | 4.767428842 | 3.943154111 | 0.276181736  | 0.849493986 | 0.901875746 | AC234783.1 |
| ENSG00000215065 | 0.601596751 | 0.336469917 | 0.64056042   | 0.849581383 | 1           | BX547991.1 |
| ENSG00000257890 | 0.601596751 | 0.336469917 | 0.64056042   | 0.849581383 | 1           | AC011595.2 |
| ENSG00000224523 | 0.601596751 | 0.336469917 | 0.64056042   | 0.849581383 | 1           | AL445213.1 |
| ENSG00000224117 | 0.601596751 | 0.336469917 | 0.64056042   | 0.849581383 | 1           | PTPN2P2    |
| ENSG00000243353 | 0.601596751 | 0.336469917 | 0.64056042   | 0.849581383 | 1           | RPS29P19   |
| ENSG00000187714 | 0.601596751 | 0.336469917 | 0.64056042   | 0.849581383 | 1           | SLC18A3    |
| ENSG00000279334 | 0.601596751 | 0.336469917 | 0.64056042   | 0.849581383 | 1           | AC073592.6 |
| ENSG00000262292 | 0.601596751 | 0.336469917 | 0.64056042   | 0.849581383 | 1           | AC007952.5 |
| ENSG00000199366 | 0.601596751 | 0.336469917 | 0.64056042   | 0.849581383 | 1           | RF00019    |
| ENSG00000228915 | 2.712235611 | 3.300895859 | -0.275545554 | 0.849585826 | 0.901928108 | ORFE128P   |
| ENSG00000228407 | 1.203193503 | 1.682349583 | -0.494605469 | 0.849684146 | 0.901928108 | AL139156.2 |
| ENSG00000278869 | 1.789675198 | 1.41669944  | 0.336205518  | 0.849691392 | 0.901928108 | BX539320.1 |
| ENSG00000219992 | 1.789675198 | 1.41669944  | 0.336205518  | 0.849691392 | 0.901928108 | AL391422.1 |
| ENSG00000233205 | 7.640986747 | 8.752794155 | -0.194439094 | 0.849716881 | 0.901928108 | AC108479.1 |
| ENSG00000198553 | 5.995837861 | 6.887510957 | -0.194571995 | 0.849813919 | 0.901979345 | KCNRG      |
| ENSG00000137656 | 357.336561  | 370.5232689 | -0.051867653 | 0.849834586 | 0.901979345 | BUD13      |
| ENSG00000101222 | 3.638556971 | 4.219416739 | -0.221903099 | 0.850069765 | 0.902162969 | SPEF1      |
| ENSG00000166800 | 8.428694033 | 7.56045079  | 0.159519086  | 0.850077042 | 0.902162969 | LDHAL6A    |
| ENSG00000236641 | 0.600343103 | 0.336469917 | 0.638139766  | 0.850178409 | 1           | Z99916.1   |
| ENSG00000275811 | 0.600343103 | 0.336469917 | 0.638139766  | 0.850178409 | 1           | HTR1DP1    |
| ENSG00000201746 | 0.600343103 | 0.336469917 | 0.638139766  | 0.850178409 | 1           | RNU6-828P  |
| ENSG00000286055 | 0.600343103 | 0.336469917 | 0.638139766  | 0.850178409 | 1           | AC093890.2 |
| ENSG00000226723 | 0.600343103 | 0.336469917 | 0.638139766  | 0.850178409 | 1           | AL513175.1 |
| ENSG00000251075 | 0.600343103 | 0.336469917 | 0.638139766  | 0.850178409 | 1           | HTT-AS     |
| ENSG00000258922 | 0.600343103 | 0.336469917 | 0.638139766  | 0.850178409 | 1           | AC106028.2 |
| ENSG00000272682 | 0.600343103 | 0.336469917 | 0.638139766  | 0.850178409 | 1           | AC004471.2 |
| ENSG00000225076 | 0.600343103 | 0.336469917 | 0.638139766  | 0.850178409 | 1           | WWC3-AS1   |

|                 |             |             |              |             |             |            |
|-----------------|-------------|-------------|--------------|-------------|-------------|------------|
| ENSG00000253463 | 0.600343103 | 0.336469917 | 0.638139766  | 0.850178409 | 1           | HMGB1P19   |
| ENSG00000270775 | 0.600343103 | 0.336469917 | 0.638139766  | 0.850178409 | 1           | AP000436.1 |
| ENSG00000261427 | 0.600343103 | 0.336469917 | 0.638139766  | 0.850178409 | 1           | AC099518.3 |
| ENSG00000268289 | 0.600343103 | 0.336469917 | 0.638139766  | 0.850178409 | 1           | AC020908.1 |
| ENSG00000286080 | 0.600343103 | 0.336469917 | 0.638139766  | 0.850178409 | 1           | AC011477.8 |
| novel.48        | 0.600343103 | 0.336469917 | 0.638139766  | 0.850178409 | 1           | -          |
| ENSG00000188375 | 2.139615324 | 2.567748738 | -0.257653046 | 0.850210953 | 0.902268229 | H3F3C      |
| ENSG00000185088 | 2838.092422 | 2935.571219 | -0.048796881 | 0.850249662 | 0.902272453 | RPS27L     |
| ENSG00000132386 | 2520.392765 | 2310.605853 | 0.12535091   | 0.850349381 | 0.902326807 | SERPINF1   |
| ENSG00000215421 | 253.5029896 | 261.2592299 | -0.04436973  | 0.850370343 | 0.902326807 | ZNF407     |
| ENSG00000168016 | 425.2787114 | 450.4042712 | -0.082960148 | 0.850514016 | 0.902442402 | TRANK1     |
| ENSG00000217783 | 1.526664462 | 1.069617038 | 0.509399628  | 0.850521716 | 1           | LDHAL6FP   |
| ENSG00000286686 | 1.835020366 | 1.365948763 | 0.407380398  | 0.850568198 | 0.902463035 | AL136040.2 |
| ENSG00000283078 | 10.69682297 | 9.631176843 | 0.146596191  | 0.850634955 | 0.902483207 | AL137077.2 |
| ENSG00000138101 | 113.8080468 | 108.4966139 | 0.067465723  | 0.850656682 | 0.902483207 | DTNB       |
| ENSG00000258344 | 2.420248412 | 2.893606169 | -0.254648943 | 0.851119972 | 0.902937852 | AC078778.1 |
| ENSG00000279742 | 1.801029308 | 1.436768536 | 0.329092393  | 0.851193164 | 0.902978629 | AP000974.1 |
| ENSG00000241120 | 1.50778846  | 1.069617038 | 0.493474076  | 0.85120115  | 1           | HMG1P8     |
| ENSG00000287811 | 8.2614595   | 9.254568735 | -0.168845208 | 0.851258604 | 0.903011179 | AL391840.3 |
| ENSG00000185641 | 623.2338037 | 646.934853  | -0.053688705 | 0.851305151 | 0.903023685 | AC034236.1 |
| ENSG00000254634 | 4.519533163 | 5.379922647 | -0.250746834 | 0.851754249 | 0.90346318  | SMG1P6     |
| ENSG00000272977 | 57.79146775 | 54.18354052 | 0.096664751  | 0.851887307 | 0.903510295 | AL008721.2 |
| ENSG00000244513 | 34.77218967 | 32.27727131 | 0.102594194  | 0.851899909 | 0.903510295 | AC109587.1 |
| ENSG00000171574 | 182.4439132 | 190.736258  | -0.06495198  | 0.851902994 | 0.903510295 | ZNF584     |
| ENSG00000116005 | 1835.091952 | 1912.065029 | -0.059400597 | 0.852269672 | 0.903826829 | PCYOX1     |
| ENSG00000170949 | 554.177682  | 577.7588091 | -0.059606018 | 0.852301704 | 0.903826829 | ZNF160     |
| ENSG00000258789 | 5.720219368 | 6.522671209 | -0.184118584 | 0.852315155 | 0.903826829 | AL162171.2 |
| ENSG00000130545 | 2.770188538 | 2.0188195   | 0.442542354  | 0.8523406   | 0.903826829 | CRB3       |
| ENSG00000170142 | 1577.760298 | 1637.760711 | -0.053640744 | 0.852414374 | 0.903858557 | UBE2E1     |
| ENSG00000152117 | 530.8735405 | 508.5790196 | 0.062238306  | 0.8524663   | 0.903858557 | AC073869.1 |
| ENSG00000249212 | 1.817398012 | 2.292641984 | -0.3143626   | 0.852474888 | 0.903858557 | ATP1B1P1   |
| ENSG00000079432 | 1654.371837 | 1719.871767 | -0.05583894  | 0.852817659 | 0.904185089 | CIC        |
| ENSG00000240914 | 4.792644359 | 5.513261459 | -0.189082266 | 0.853059279 | 0.904404355 | RPL15P2    |
| ENSG00000278090 | 2.052685933 | 1.345879667 | 0.602028896  | 0.853094338 | 0.904404619 | LUNAR1     |
| ENSG00000219433 | 1.802282956 | 2.180528143 | -0.265173229 | 0.85313989  | 0.904416006 | BTBD10P2   |
| ENSG00000232879 | 1.466204238 | 2.038888596 | -0.478713888 | 0.853188526 | 0.904430662 | AL591806.2 |
| ENSG00000162769 | 194.1178445 | 200.8641536 | -0.049753154 | 0.853549748 | 0.904776662 | FLVCR1     |
| ENSG00000271105 | 3.299970955 | 3.852265241 | -0.229169751 | 0.853618485 | 0.904812609 | SCML2P2    |
| ENSG00000135211 | 270.3708341 | 262.1928584 | 0.043492279  | 0.853735301 | 0.904899513 | TMEM60     |
| ENSG00000272525 | 9.454552542 | 8.529722348 | 0.141893597  | 0.853810631 | 0.904921295 | AC099522.2 |
| ENSG00000159445 | 358.4850209 | 371.5340098 | -0.052158511 | 0.853825512 | 0.904921295 | THEM4      |
| ENSG00000262482 | 5.366518295 | 4.523920805 | 0.260460697  | 0.853953872 | 0.905020418 | AC004034.1 |
| ENSG00000261291 | 1.466204238 | 1.029478846 | 0.503351552  | 0.854176676 | 1           | AC007906.1 |
| ENSG00000105497 | 256.3470016 | 269.0884005 | -0.068937918 | 0.854337271 | 0.905389812 | ZNF175     |
| ENSG00000168264 | 2332.301177 | 2393.59194  | -0.03751213  | 0.854525096 | 0.905551924 | IRF2BP2    |
| ENSG00000242992 | 1.493927053 | 1.069617038 | 0.48183011   | 0.854710242 | 1           | FTH1P4     |
| novel.1091      | 3.079798091 | 3.861721852 | -0.333469175 | 0.854752085 | 0.905724944 | -          |
| ENSG00000149531 | 92.69474961 | 97.34710787 | -0.070693881 | 0.854758089 | 0.905724944 | FRG1BP     |
| ENSG00000279233 | 47.15983487 | 43.18423156 | 0.130033826  | 0.854816037 | 0.905749407 | AC122688.3 |
| ENSG00000214135 | 353.6862226 | 340.1126803 | 0.057185381  | 0.854871051 | 0.905770759 | AC132008.2 |
| ENSG00000213018 | 5.700089716 | 5.023383634 | 0.184835198  | 0.85497208  | 0.905811476 | AL590762.1 |

|                 |             |             |              |             |             |            |
|-----------------|-------------|-------------|--------------|-------------|-------------|------------|
| ENSG00000245651 | 9.259310461 | 10.47772208 | -0.18140955  | 0.854979209 | 0.905811476 | AC083805.1 |
| ENSG00000271711 | 2.376156893 | 1.874739808 | 0.358403599  | 0.855114026 | 0.905917367 | AC069236.1 |
| ENSG00000272573 | 0.921306765 | 1.426156051 | -0.633829329 | 0.855319344 | 1           | MUSTN1     |
| ENSG00000234324 | 0.921306765 | 1.426156051 | -0.633829329 | 0.855319344 | 1           | RPL9P2     |
| ENSG00000103496 | 994.9532422 | 958.5454489 | 0.054139243  | 0.855644504 | 0.906398043 | STX4       |
| ENSG00000261838 | 2.127007565 | 2.51699806  | -0.243845942 | 0.855670553 | 0.906398043 | AC092718.6 |
| ENSG00000174236 | 3.297463658 | 2.762579107 | 0.242406915  | 0.855672407 | 0.906398043 | REP15      |
| ENSG00000266852 | 2.125753916 | 1.773238453 | 0.252993377  | 0.855853095 | 0.906519011 | MIR4482    |
| ENSG00000286305 | 4.160817495 | 5.206317249 | -0.315977837 | 0.855883881 | 0.906519011 | AC004893.3 |
| ENSG00000164933 | 8.988706562 | 9.986559981 | -0.150954063 | 0.855899514 | 0.906519011 | SLC25A32   |
| ENSG00000267519 | 957.2392551 | 1016.02881  | -0.08586468  | 0.855926171 | 0.906519011 | AC020916.1 |
| ENSG00000164168 | 623.8103709 | 642.2013788 | -0.042365354 | 0.856022188 | 0.906578391 | TMEM184C   |
| ENSG00000269388 | 36.72429827 | 34.2569801  | 0.096434026  | 0.856052025 | 0.906578391 | AC018755.3 |
| novel.587       | 10.20450782 | 9.242671979 | 0.154403424  | 0.8563848   | 0.906879689 | -          |
| ENSG00000240036 | 66.75176732 | 69.6859305  | -0.06089952  | 0.856417692 | 0.906879689 | AC104563.1 |
| ENSG00000237296 | 23.09234606 | 25.45223221 | -0.139478959 | 0.856441247 | 0.906879689 | SMG1P1     |
| ENSG00000230697 | 0.925067711 | 1.426156051 | -0.62861045  | 0.856474004 | 1           | SAP18P3    |
| ENSG00000283235 | 0.925067711 | 1.426156051 | -0.62861045  | 0.856474004 | 1           | AC139493.2 |
| ENSG00000180221 | 0.925067711 | 1.426156051 | -0.62861045  | 0.856474004 | 1           | TPT1P10    |
| ENSG00000279590 | 1.7871679   | 1.436768536 | 0.320500366  | 0.856699376 | 0.907116049 | AC005786.4 |
| ENSG00000170619 | 575.5484894 | 557.124111  | 0.046612766  | 0.856765316 | 0.90713084  | COMMD5     |
| ENSG00000252686 | 1.17296339  | 1.782695063 | -0.600549275 | 0.856783176 | 0.90713084  | RNU6-1234P |
| ENSG00000204685 | 93.00923121 | 89.60817139 | 0.055964682  | 0.856874349 | 0.907190402 | STARD7-AS1 |
| novel.161       | 7.29230027  | 6.429470589 | 0.178829867  | 0.856942166 | 0.907225232 | -          |
| ENSG00000162407 | 1823.956935 | 1675.100277 | 0.122706486  | 0.856992696 | 0.907241758 | PLPP3      |
| ENSG00000136197 | 16.49011032 | 15.20464559 | 0.117695172  | 0.857089083 | 0.907306828 | C7orf25    |
| ENSG00000240695 | 4.80274482  | 4.025742245 | 0.261277759  | 0.857179422 | 0.907348033 | AC117382.1 |
| ENSG00000233251 | 9.528874174 | 7.95956814  | 0.253030966  | 0.857197855 | 0.907348033 | AC007743.1 |
| ENSG00000106927 | 2.666890443 | 2.191140629 | 0.295450518  | 0.857233385 | 0.907348675 | AMBP       |
| ENSG00000101986 | 375.5694188 | 387.7975659 | -0.046025282 | 0.857273022 | 0.907353664 | ABCD1      |
| ENSG00000223508 | 30.50682043 | 32.72354332 | -0.104750639 | 0.857376921 | 0.907394297 | RPL23AP53  |
| ENSG00000127946 | 1183.64854  | 1140.081681 | 0.054383408  | 0.857381263 | 0.907394297 | HIP1       |
| ENSG00000228818 | 2.11063886  | 1.753169357 | 0.256466311  | 0.857608217 | 0.907597519 | AL359918.1 |
| ENSG00000269951 | 7.707430481 | 6.54158443  | 0.241496702  | 0.85797173  | 0.907945237 | AC090181.2 |
| ENSG00000138496 | 1125.427137 | 1163.827517 | -0.048671596 | 0.858167857 | 0.908083904 | PARP9      |
| ENSG00000248415 | 3.029438327 | 3.668047357 | -0.270649579 | 0.858172668 | 0.908083904 | GAPDHP61   |
| ENSG00000240211 | 1.495180701 | 1.161661783 | 0.395232938  | 0.858228461 | 1           | AC092849.1 |
| ENSG00000275449 | 8.428694033 | 7.683177117 | 0.143616265  | 0.858318254 | 0.908176116 | MIR6859-3  |
| ENSG00000261625 | 7.386751553 | 8.731569184 | -0.241792981 | 0.858330832 | 0.908176116 | AP003071.4 |
| ENSG00000132912 | 1294.592458 | 1268.146416 | 0.029859716  | 0.858378672 | 0.908176116 | DCTN4      |
| ENSG00000163611 | 46.01230046 | 48.95265907 | -0.086373035 | 0.858399634 | 0.908176116 | SPICE1     |
| ENSG00000225080 | 2.977753644 | 3.749479616 | -0.321721575 | 0.858543269 | 0.908291094 | PFN1P4     |
| ENSG00000168395 | 897.7234761 | 928.3587753 | -0.048211029 | 0.858602221 | 0.908296786 | ING5       |
| ENSG00000118242 | 63.02384458 | 59.20371332 | 0.090336829  | 0.85861857  | 0.908296786 | MREG       |
| ENSG00000163888 | 8.849194844 | 9.701996617 | -0.135011766 | 0.858714978 | 0.908361786 | CAMK2N2    |
| ENSG00000124399 | 4.861951396 | 4.230029225 | 0.192283545  | 0.858791514 | 0.908384232 | NDUFB4P12  |
| ENSG00000238086 | 5.056908743 | 4.218260864 | 0.259294994  | 0.858806124 | 0.908384232 | PPP1R26P1  |
| ENSG00000233327 | 5.196776466 | 6.15680398  | -0.254556205 | 0.859028567 | 0.908582527 | USP32P2    |
| ENSG00000271382 | 1.818651661 | 2.160459047 | -0.247370876 | 0.859075717 | 0.908595408 | AC012464.3 |
| ENSG00000282511 | 2.699627853 | 2.11916498  | 0.346216198  | 0.859222316 | 0.908686165 | CLUHP10    |
| ENSG00000283709 | 22.75905938 | 24.22193401 | -0.088107587 | 0.859231477 | 0.908686165 | FAM238C    |

|                 |             |             |              |             |             |             |
|-----------------|-------------|-------------|--------------|-------------|-------------|-------------|
| ENSG00000286588 | 5.074531097 | 4.42241945  | 0.210988479  | 0.859282076 | 0.908702687 | AC10484.1.1 |
| ENSG00000180035 | 182.6876484 | 188.4077974 | -0.045566422 | 0.859406021 | 0.908796769 | ZNF48       |
| ENSG00000176973 | 151.0231219 | 157.9654316 | -0.066201185 | 0.859461822 | 0.908818787 | FAM89B      |
| ENSG00000238099 | 5.477409555 | 4.840321626 | 0.190707043  | 0.859710593 | 0.909017417 | LINC01625   |
| ENSG00000285737 | 3.591958154 | 3.036401591 | 0.26258857   | 0.859726727 | 0.909017417 | LINC02680   |
| ENSG00000177565 | 1568.929021 | 1612.524186 | -0.039655529 | 0.859760283 | 0.909017417 | TBL1XR1     |
| ENSG00000259065 | 23.7546165  | 22.08514008 | 0.10160914   | 0.859789616 | 0.909017417 | AC005520.2  |
| ENSG00000221978 | 3755.366468 | 3856.139879 | -0.038121614 | 0.859824846 | 0.909017673 | CCNL2       |
| ENSG00000285210 | 8.491661555 | 9.710168958 | -0.185893636 | 0.859985177 | 0.909150183 | AL136382.1  |
| ENSG00000119986 | 395.814293  | 374.5152596 | 0.079267718  | 0.860107999 | 0.909243029 | AVPI1       |
| ENSG00000230751 | 1.801029308 | 2.241891306 | -0.299212495 | 0.860276505 | 0.90938416  | AC007036.2  |
| ENSG00000198408 | 3593.179761 | 3513.858553 | 0.032242324  | 0.860441832 | 0.909521918 | OGA         |
| ENSG00000254604 | 6.034914786 | 6.757639771 | -0.165096362 | 0.860524441 | 0.909572233 | AP002336.2  |
| ENSG00000266921 | 6.398716319 | 5.494476633 | 0.206234175  | 0.860981776 | 0.909977488 | AC006213.1  |
| ENSG00000091010 | 2.699627853 | 3.210006989 | -0.248995695 | 0.860985863 | 0.909977488 | POU4F3      |
| ENSG00000252516 | 5.365264647 | 4.656232136 | 0.207263514  | 0.861035333 | 0.909977488 | RNA5SP82    |
| ENSG00000120519 | 135.7936598 | 140.0013234 | -0.043088381 | 0.861047941 | 0.909977488 | SLC10A7     |
| ENSG00000244405 | 926.7393709 | 899.5434318 | 0.042743616  | 0.861087518 | 0.909982298 | ETV5        |
| ENSG00000269899 | 4.763667895 | 3.983292303 | 0.262644367  | 0.861296856 | 0.910133394 | AC025857.2  |
| ENSG00000260643 | 9.460820786 | 8.449445965 | 0.155080085  | 0.861306409 | 0.910133394 | AC092718.3  |
| ENSG00000262039 | 1.846374476 | 1.447381022 | 0.350505597  | 0.861388308 | 0.910133394 | AC091180.5  |
| ENSG00000168872 | 403.1833788 | 415.8234202 | -0.045044809 | 0.8613981   | 0.910133394 | DDX19A      |
| ENSG00000258926 | 7.798120818 | 8.742181669 | -0.157967317 | 0.861405648 | 0.910133394 | AL355916.2  |
| ENSG00000238133 | 5.790780053 | 5.156722446 | 0.175821532  | 0.861653364 | 0.910355172 | MAP3K20-AS1 |
| ENSG00000233143 | 2.758834428 | 2.261960402 | 0.299031797  | 0.861685632 | 0.910355172 | DIRC3-AS1   |
| ENSG00000260136 | 11.01395441 | 9.866145405 | 0.151281466  | 0.861749229 | 0.910385342 | AC008915.2  |
| ENSG00000092010 | 805.2354934 | 839.1152947 | -0.059322013 | 0.861800631 | 0.910402626 | PSME1       |
| ENSG00000234797 | 966.1658322 | 1003.151637 | -0.054258042 | 0.861962666 | 0.910536777 | RPS3AP6     |
| ENSG00000227060 | 6.372247153 | 7.142548615 | -0.16731629  | 0.862075232 | 0.910618662 | LINC00629   |
| ENSG00000253341 | 7.226754179 | 6.582878497 | 0.145194137  | 0.862203136 | 0.910716741 | AC115837.1  |
| ENSG00000266066 | 28.09917978 | 26.40246216 | 0.092425751  | 0.862252646 | 0.91073201  | POLRMT1     |
| ENSG00000266680 | 10.91065632 | 9.834307948 | 0.142495054  | 0.862346491 | 0.910794104 | AL135905.1  |
| ENSG00000281530 | 2.68075185  | 3.189937893 | -0.249727081 | 0.862409351 | 0.910823469 | AC004461.2  |
| ENSG00000213706 | 1.535511275 | 1.00940975  | 0.592210105  | 0.862667157 | 1           | AL590762.2  |
| ENSG00000248787 | 5.336288183 | 6.124838129 | -0.191906702 | 0.862842583 | 0.91124398  | AC092903.2  |
| ENSG00000172460 | 4.897196103 | 4.117915384 | 0.235302042  | 0.86299177  | 0.911315771 | PRSS30P     |
| ENSG00000164237 | 672.0538682 | 620.548187  | 0.114890284  | 0.863016472 | 0.911315771 | CMBL        |
| ENSG00000274191 | 3.018084217 | 2.558292127 | 0.247077692  | 0.863043323 | 0.911315771 | AC026333.4  |
| ENSG00000101333 | 110.6277423 | 123.1683241 | -0.154125488 | 0.86308988  | 0.911315771 | PLCB4       |
| ENSG00000242999 | 3.034452922 | 2.52645467  | 0.265048913  | 0.86309611  | 0.911315771 | RN7SL239P   |
| ENSG00000287134 | 23.69680612 | 21.83023082 | 0.113361321  | 0.863121019 | 0.911315771 | AC106845.2  |
| novel.892       | 3.518890171 | 4.991546178 | -0.502938391 | 0.863160049 | 0.911319946 | -           |
| ENSG00000166126 | 8.218621629 | 7.307853278 | 0.157253     | 0.863286965 | 0.911416905 | AMN         |
| ENSG00000231916 | 1.804790254 | 1.406086955 | 0.353901964  | 0.863466695 | 0.911569614 | AC006033.1  |
| ENSG00000225973 | 144.4880853 | 149.6953233 | -0.052195446 | 0.863572796 | 0.911644582 | PIGBOS1     |
| ENSG00000254510 | 3.647403784 | 3.11911812  | 0.208696032  | 0.8636329   | 0.911659199 | AP001107.5  |
| ENSG00000234156 | 1.510295757 | 1.874739808 | -0.29363673  | 0.863656821 | 0.911659199 | AL359636.2  |
| ENSG00000139410 | 189.3828955 | 202.9136675 | -0.100669089 | 0.863756169 | 0.911702388 | SDSL        |
| ENSG00000230160 | 1.466204238 | 1.060160428 | 0.469509267  | 0.863791745 | 1           | AC004854.1  |
| ENSG00000206612 | 2.654282684 | 3.384768263 | -0.355441053 | 0.863802597 | 0.911702388 | SNORA2A     |
| ENSG00000117155 | 222.4145881 | 233.2303531 | -0.069555751 | 0.863823447 | 0.911702388 | SSX2IP      |



|                 |             |             |              |             |             |            |
|-----------------|-------------|-------------|--------------|-------------|-------------|------------|
| ENSG00000248936 | 1.850135422 | 1.41669944  | 0.377319322  | 0.8638381   | 0.911702388 | AC027607.1 |
| ENSG00000254964 | 3.240764379 | 3.923085015 | -0.271179197 | 0.863888115 | 0.911718137 | AP001458.1 |
| ENSG00000226158 | 1.495180701 | 1.885352294 | -0.312549129 | 0.864007592 | 0.911807192 | CLCP2      |
| ENSG00000229867 | 10.83758834 | 9.720781443 | 0.167224634  | 0.864189515 | 0.911962136 | STEAP3-AS1 |
| ENSG00000240370 | 39.94786757 | 37.38311469 | 0.093119558  | 0.864238464 | 0.911976749 | RPL13P5    |
| ENSG00000279246 | 3.311325065 | 2.904218654 | 0.19774006   | 0.864286898 | 0.91197753  | AP003108.3 |
| ENSG00000266402 | 4.134348329 | 3.455588036 | 0.253326774  | 0.864309408 | 0.91197753  | SNHG25     |
| ENSG00000246095 | 3.08105174  | 2.537067156 | 0.279092203  | 0.864484279 | 0.912125003 | LINC01096  |
| ENSG00000160326 | 0.908699006 | 0.693008929 | 0.368686613  | 0.864533377 | 1           | SLC2A6     |
| ENSG00000265728 | 1.17296339  | 0.774441189 | 0.618480588  | 0.864542144 | 1           | AP001099.1 |
| ENSG00000228316 | 1.17296339  | 0.774441189 | 0.618480588  | 0.864542144 | 1           | MTATP6P19  |
| ENSG00000108950 | 148.6806984 | 118.0689618 | 0.332290911  | 0.864594891 | 0.912204664 | FAM20A     |
| ENSG00000201772 | 4.24398594  | 3.597227584 | 0.23887966   | 0.864675939 | 0.912211544 | SNORA5C    |
| ENSG00000255443 | 5.132484024 | 5.868644597 | -0.186097437 | 0.864675981 | 0.912211544 | CD44-AS1   |
| ENSG00000166946 | 854.1724785 | 831.4142868 | 0.039304878  | 0.864706744 | 0.912211544 | CCNDBP1    |
| ENSG00000272354 | 2.416487466 | 3.02822925  | -0.337002351 | 0.864810574 | 0.912284036 | AC092354.1 |
| ENSG00000183386 | 493.5569026 | 509.6456142 | -0.04686655  | 0.864867296 | 0.91230683  | FHL3       |
| ENSG00000132793 | 500.8980276 | 476.9800008 | 0.070839008  | 0.865078657 | 0.912473082 | LPIN3      |
| ENSG00000151364 | 24.94401987 | 26.60076015 | -0.093334298 | 0.865111974 | 0.912473082 | KCTD14     |
| ENSG00000258171 | 2.416487466 | 2.802717299 | -0.223750629 | 0.865139506 | 0.912473082 | LINC02412  |
| ENSG00000124615 | 600.9500945 | 617.1947298 | -0.038193654 | 0.865165386 | 0.912473082 | MOCS1      |
| ENSG00000161180 | 9.307162927 | 8.418764383 | 0.138682929  | 0.865226226 | 0.912490503 | CCDC116    |
| ENSG00000273691 | 2.094270155 | 2.537067156 | -0.269619151 | 0.865252147 | 0.912490503 | AC087284.1 |
| ENSG00000240163 | 1.773306493 | 1.365948763 | 0.365669831  | 0.865628219 | 0.912850053 | AC087385.1 |
| ENSG00000230793 | 4.149463386 | 3.537020296 | 0.231108718  | 0.865780493 | 0.912973577 | SMARCE1P5  |
| ENSG00000267185 | 5.174068246 | 4.606637334 | 0.158973562  | 0.86588135  | 0.913042873 | PTP4A2P1   |
| ENSG00000226545 | 1.7871679   | 1.467450118 | 0.299790528  | 0.865969712 | 0.913098989 | AL357552.1 |
| ENSG00000166233 | 1170.403652 | 1200.808407 | -0.03684215  | 0.86603249  | 0.913124997 | ARIH1      |
| ENSG00000101842 | 3.65116473  | 3.169868797 | 0.192700271  | 0.86606467  | 0.913124997 | VSIG1      |
| ENSG00000221887 | 6.973843905 | 7.95956814  | -0.198386975 | 0.86617271  | 0.91320185  | HMSD       |
| ENSG00000151617 | 174.2282529 | 188.1870842 | -0.11214108  | 0.866326921 | 0.913269157 | EDNRA      |
| ENSG00000158486 | 2.76893489  | 3.271370153 | -0.241384403 | 0.86634884  | 0.913269157 | DNAH3      |
| ENSG00000254388 | 1.466204238 | 2.139234076 | -0.542176345 | 0.866416044 | 0.913269157 | DUTP2      |
| ENSG00000113369 | 1084.745483 | 1114.044714 | -0.038335255 | 0.866419338 | 0.913269157 | ARRDC3     |
| ENSG00000223945 | 1.788421549 | 1.456837632 | 0.306521881  | 0.866447069 | 0.913269157 | AC244033.1 |
| ENSG00000155275 | 217.687861  | 210.6814749 | 0.047646544  | 0.866478497 | 0.913269157 | TRMT44     |
| ENSG00000165757 | 917.743704  | 837.5094105 | 0.131981035  | 0.866482611 | 0.913269157 | JCAD       |
| ENSG00000169991 | 343.5375867 | 361.869476  | -0.074411165 | 0.866646506 | 0.913404847 | IFFO2      |
| ENSG00000108599 | 608.2707577 | 623.9035795 | -0.036199895 | 0.866857233 | 0.913550936 | AKAP10     |
| ENSG00000230699 | 64.52684787 | 86.00628595 | -0.414591753 | 0.866858618 | 0.913550936 | AL645608.2 |
| ENSG00000250317 | 384.414268  | 399.1354466 | -0.054665546 | 0.866919303 | 0.913550936 | SMIM20     |
| ENSG00000154025 | 2.710981963 | 2.292641984 | 0.265956461  | 0.86693426  | 0.913550936 | SLC5A10    |
| ENSG00000280038 | 2.06654734  | 1.548882377 | 0.434737721  | 0.866960928 | 0.913550936 | DNM1P41    |
| ENSG00000274015 | 2.415233817 | 2.873537073 | -0.249632205 | 0.867136341 | 0.913698718 | AL136038.5 |
| ENSG00000270761 | 6.962489795 | 6.072803182 | 0.20964591   | 0.867246322 | 0.913777545 | AL355353.1 |
| ENSG00000090612 | 292.6429211 | 284.1317355 | 0.042174407  | 0.867379943 | 0.913856693 | ZNF268     |
| ENSG00000153485 | 3.077290793 | 2.578361223 | 0.260084591  | 0.867391788 | 0.913856693 | TMEM251    |
| ENSG00000226754 | 5.189183302 | 5.777755727 | -0.155804685 | 0.867588643 | 0.914027028 | AL606760.1 |
| ENSG00000200550 | 1.848881773 | 1.447381022 | 0.352268983  | 0.867739667 | 0.914149067 | RNU6-137P  |
| novel.996       | 82.89856141 | 75.37433874 | 0.138393363  | 0.86777984  | 0.914154321 | -          |
| novel.124       | 0.616711807 | 0.387220594 | 0.67127832   | 0.86789498  | 1           | -          |

|                 |             |             |            |            |   |              |
|-----------------|-------------|-------------|------------|------------|---|--------------|
| ENSG00000249019 | 0.616711807 | 0.336469917 | 0.67127832 | 0.86789498 | 1 | AC108471.1   |
| ENSG00000267719 | 0.616711807 | 0.356539013 | 0.67127832 | 0.86789498 | 1 | LINC02078    |
| ENSG00000235044 | 0.616711807 | 0.387220594 | 0.67127832 | 0.86789498 | 1 | PPIAP3       |
| ENSG00000124391 | 0.616711807 | 0.356539013 | 0.67127832 | 0.86789498 | 1 | IL17C        |
| ENSG00000239593 | 0.616711807 | 0.356539013 | 0.67127832 | 0.86789498 | 1 | AL513122.2   |
| ENSG00000272456 | 0.616711807 | 0.356539013 | 0.67127832 | 0.86789498 | 1 | AC087045.2   |
| ENSG00000257906 | 0.616711807 | 0.387220594 | 0.67127832 | 0.86789498 | 1 | LINC02156    |
| ENSG00000274330 | 0.616711807 | 0.356539013 | 0.67127832 | 0.86789498 | 1 | AL160191.3   |
| ENSG00000147570 | 0.616711807 | 0.356539013 | 0.67127832 | 0.86789498 | 1 | DNAJC5B      |
| ENSG00000229330 | 0.616711807 | 0.356539013 | 0.67127832 | 0.86789498 | 1 | AC006947.1   |
| ENSG00000268266 | 0.616711807 | 0.387220594 | 0.67127832 | 0.86789498 | 1 | AC003005.2   |
| ENSG00000224715 | 0.616711807 | 0.356539013 | 0.67127832 | 0.86789498 | 1 | Z82186.1     |
| ENSG00000237864 | 0.616711807 | 0.336469917 | 0.67127832 | 0.86789498 | 1 | LINC00322    |
| ENSG00000222650 | 0.616711807 | 0.387220594 | 0.67127832 | 0.86789498 | 1 | RNU2-70P     |
| ENSG00000226828 | 0.616711807 | 0.356539013 | 0.67127832 | 0.86789498 | 1 | AL591885.1   |
| ENSG00000286480 | 0.616711807 | 0.356539013 | 0.67127832 | 0.86789498 | 1 | AC009501.3   |
| ENSG00000242908 | 0.616711807 | 0.356539013 | 0.67127832 | 0.86789498 | 1 | AADACL2-AS1  |
| ENSG00000229646 | 0.616711807 | 0.387220594 | 0.67127832 | 0.86789498 | 1 | AL109914.1   |
| ENSG00000077800 | 0.616711807 | 0.387220594 | 0.67127832 | 0.86789498 | 1 | FKBP6        |
| ENSG00000199627 | 0.616711807 | 0.387220594 | 0.67127832 | 0.86789498 | 1 | RNU6-1010P   |
| ENSG00000287959 | 0.616711807 | 0.336469917 | 0.67127832 | 0.86789498 | 1 | AC021236.1   |
| ENSG00000241825 | 0.616711807 | 0.336469917 | 0.67127832 | 0.86789498 | 1 | RPL7P42      |
| ENSG00000258048 | 0.616711807 | 0.356539013 | 0.67127832 | 0.86789498 | 1 | AC073569.2   |
| ENSG00000201071 | 0.616711807 | 0.336469917 | 0.67127832 | 0.86789498 | 1 | RF00019      |
| ENSG00000262962 | 0.616711807 | 0.387220594 | 0.67127832 | 0.86789498 | 1 | KARSP3       |
| ENSG00000207092 | 0.616711807 | 0.356539013 | 0.67127832 | 0.86789498 | 1 | RF00019      |
| ENSG00000240673 | 0.616711807 | 0.387220594 | 0.67127832 | 0.86789498 | 1 | AC006539.1   |
| novel.972       | 0.616711807 | 0.336469917 | 0.67127832 | 0.86789498 | 1 | -            |
| ENSG00000231090 | 0.616711807 | 0.356539013 | 0.67127832 | 0.86789498 | 1 | MIR4422HG    |
| ENSG00000173212 | 0.616711807 | 0.336469917 | 0.67127832 | 0.86789498 | 1 | MAB21L3      |
| ENSG00000236940 | 0.616711807 | 0.356539013 | 0.67127832 | 0.86789498 | 1 | AL589765.3   |
| ENSG00000225857 | 0.616711807 | 0.336469917 | 0.67127832 | 0.86789498 | 1 | AL162431.1   |
| ENSG00000227237 | 0.616711807 | 0.387220594 | 0.67127832 | 0.86789498 | 1 | AL672291.1   |
| ENSG00000186148 | 0.616711807 | 0.356539013 | 0.67127832 | 0.86789498 | 1 | AC013268.1   |
| ENSG00000286797 | 0.616711807 | 0.336469917 | 0.67127832 | 0.86789498 | 1 | AC009315.1   |
| ENSG00000252148 | 0.616711807 | 0.387220594 | 0.67127832 | 0.86789498 | 1 | RNU6-1206P   |
| ENSG00000235424 | 0.616711807 | 0.356539013 | 0.67127832 | 0.86789498 | 1 | SUMO2P10     |
| ENSG00000242493 | 0.616711807 | 0.336469917 | 0.67127832 | 0.86789498 | 1 | RN7SL37P     |
| ENSG00000254821 | 0.616711807 | 0.356539013 | 0.67127832 | 0.86789498 | 1 | AL136309.4   |
| ENSG00000286819 | 0.616711807 | 0.387220594 | 0.67127832 | 0.86789498 | 1 | Z98745.1     |
| ENSG00000196748 | 0.616711807 | 0.356539013 | 0.67127832 | 0.86789498 | 1 | CLPSL2       |
| ENSG00000237713 | 0.616711807 | 0.387220594 | 0.67127832 | 0.86789498 | 1 | AC011287.2   |
| ENSG00000213483 | 0.616711807 | 0.387220594 | 0.67127832 | 0.86789498 | 1 | NDUFAF4P2    |
| ENSG00000244701 | 0.616711807 | 0.336469917 | 0.67127832 | 0.86789498 | 1 | AC004918.1   |
| ENSG00000261449 | 0.616711807 | 0.336469917 | 0.67127832 | 0.86789498 | 1 | AC103724.3   |
| ENSG00000230246 | 0.616711807 | 0.387220594 | 0.67127832 | 0.86789498 | 1 | SPATA31C1    |
| ENSG00000255243 | 0.616711807 | 0.336469917 | 0.67127832 | 0.86789498 | 1 | AC099687.1   |
| ENSG00000271332 | 0.616711807 | 0.356539013 | 0.67127832 | 0.86789498 | 1 | AC023206.1   |
| ENSG00000124915 | 0.616711807 | 0.356539013 | 0.67127832 | 0.86789498 | 1 | DKFZP434K028 |
| ENSG00000249028 | 0.616711807 | 0.356539013 | 0.67127832 | 0.86789498 | 1 | AC004672.1   |
| ENSG00000257120 | 0.616711807 | 0.336469917 | 0.67127832 | 0.86789498 | 1 | AL356756.1   |

|                 |             |             |              |             |             |               |
|-----------------|-------------|-------------|--------------|-------------|-------------|---------------|
| ENSG00000259632 | 0.616711807 | 0.356539013 | 0.67127832   | 0.86789498  | 1           | AC090971.4    |
| ENSG00000260378 | 0.616711807 | 0.387220594 | 0.67127832   | 0.86789498  | 1           | AC109597.1    |
| ENSG00000279815 | 0.616711807 | 0.356539013 | 0.67127832   | 0.86789498  | 1           | AC020763.5    |
| ENSG00000249451 | 0.616711807 | 0.387220594 | 0.67127832   | 0.86789498  | 1           | AC021491.1    |
| ENSG00000267203 | 0.616711807 | 0.336469917 | 0.67127832   | 0.86789498  | 1           | SNRPGP4       |
| ENSG00000267184 | 0.616711807 | 0.356539013 | 0.67127832   | 0.86789498  | 1           | AC002545.1    |
| ENSG00000286126 | 0.616711807 | 0.336469917 | 0.67127832   | 0.86789498  | 1           | AP001095.1    |
| ENSG00000284985 | 0.616711807 | 0.336469917 | 0.67127832   | 0.86789498  | 1           | AL109840.1    |
| ENSG00000214347 | 0.616711807 | 0.356539013 | 0.67127832   | 0.86789498  | 1           | AC011491.1    |
| ENSG00000242411 | 0.616711807 | 0.336469917 | 0.67127832   | 0.86789498  | 1           | AC011506.1    |
| ENSG00000278344 | 4.524619029 | 3.984448178 | 0.188345946  | 0.868076876 | 0.914397695 | AC063943.1    |
| ENSG00000272150 | 14.75058142 | 13.50235531 | 0.125904481  | 0.868101296 | 0.914397695 | NBPF25P       |
| ENSG00000133794 | 290.1687933 | 300.2335829 | -0.048510227 | 0.868116452 | 0.914397695 | ARNTL         |
| ENSG00000272669 | 33.50094278 | 35.22137137 | -0.07076523  | 0.86863493  | 0.914906722 | AL021707.6    |
| ENSG00000137462 | 1314.188336 | 1439.247289 | -0.131041782 | 0.868810582 | 0.915054635 | TLR2          |
| ENSG00000131778 | 13.82293514 | 12.83989956 | 0.115851788  | 0.868891293 | 0.91506043  | CHD1L         |
| ENSG00000233579 | 0.61420451  | 0.336469917 | 0.666159835  | 0.868907648 | 1           | KRT8P15       |
| ENSG00000232342 | 0.61420451  | 0.336469917 | 0.666159835  | 0.868907648 | 1           | AC022540.1    |
| ENSG00000212710 | 0.61420451  | 0.336469917 | 0.666159835  | 0.868907648 | 1           | CTAGE1        |
| ENSG00000238934 | 0.61420451  | 0.336469917 | 0.666159835  | 0.868907648 | 1           | RF01225       |
| ENSG00000288103 | 0.61420451  | 0.336469917 | 0.666159835  | 0.868907648 | 1           | AL359538.4    |
| ENSG00000286728 | 0.61420451  | 0.336469917 | 0.666159835  | 0.868907648 | 1           | AC009236.2    |
| ENSG00000249787 | 0.61420451  | 0.336469917 | 0.666159835  | 0.868907648 | 1           | AC113385.1    |
| ENSG00000216723 | 0.61420451  | 0.336469917 | 0.666159835  | 0.868907648 | 1           | NUDT19P3      |
| ENSG00000258534 | 0.61420451  | 0.336469917 | 0.666159835  | 0.868907648 | 1           | AL132712.1    |
| ENSG00000232542 | 0.61420451  | 0.387220594 | 0.666159835  | 0.868907648 | 1           | DPYD-IT1      |
| ENSG00000204044 | 0.61420451  | 0.387220594 | 0.666159835  | 0.868907648 | 1           | SLC12A5-AS1   |
| ENSG00000258644 | 0.61420451  | 0.387220594 | 0.666159835  | 0.868907648 | 1           | SYNJ2BP-COX16 |
| ENSG00000259457 | 0.61420451  | 0.387220594 | 0.666159835  | 0.868907648 | 1           | AC100826.1    |
| ENSG00000287055 | 0.61420451  | 0.356539013 | 0.666159835  | 0.868907648 | 1           | AL359813.1    |
| ENSG00000261760 | 0.61420451  | 0.387220594 | 0.666159835  | 0.868907648 | 1           | AC140479.4    |
| ENSG00000254484 | 0.61420451  | 0.356539013 | 0.666159835  | 0.868907648 | 1           | AP002336.1    |
| novel.431       | 0.61420451  | 0.387220594 | 0.666159835  | 0.868907648 | 1           | -             |
| ENSG00000211643 | 0.61420451  | 0.387220594 | 0.666159835  | 0.868907648 | 1           | IGLV5-52      |
| ENSG00000262198 | 0.61420451  | 0.356539013 | 0.666159835  | 0.868907648 | 1           | AL157931.1    |
| ENSG00000140107 | 0.61420451  | 0.356539013 | 0.666159835  | 0.868907648 | 1           | SLC25A47      |
| ENSG00000231494 | 0.61420451  | 0.356539013 | 0.666159835  | 0.868907648 | 1           | AC104634.1    |
| ENSG00000277450 | 0.61420451  | 0.356539013 | 0.666159835  | 0.868907648 | 1           | AC002094.4    |
| ENSG00000236483 | 0.61420451  | 0.387220594 | 0.666159835  | 0.868907648 | 1           | MTND2P40      |
| ENSG00000226394 | 0.61420451  | 0.356539013 | 0.666159835  | 0.868907648 | 1           | AC093423.1    |
| ENSG00000238719 | 0.61420451  | 0.356539013 | 0.666159835  | 0.868907648 | 1           | RNU7-96P      |
| ENSG00000243845 | 0.61420451  | 0.356539013 | 0.666159835  | 0.868907648 | 1           | RN7SL30P      |
| ENSG00000200090 | 0.61420451  | 0.356539013 | 0.666159835  | 0.868907648 | 1           | RF00019       |
| ENSG00000256633 | 0.61420451  | 0.356539013 | 0.666159835  | 0.868907648 | 1           | AP005019.1    |
| ENSG00000275488 | 0.61420451  | 0.356539013 | 0.666159835  | 0.868907648 | 1           | AC023509.4    |
| ENSG00000279562 | 0.61420451  | 0.356539013 | 0.666159835  | 0.868907648 | 1           | AC090617.8    |
| ENSG00000280018 | 0.61420451  | 0.387220594 | 0.666159835  | 0.868907648 | 1           | CU634019.6    |
| ENSG00000226349 | 0.61420451  | 0.356539013 | 0.666159835  | 0.868907648 | 1           | AC099066.1    |
| ENSG00000286361 | 0.61420451  | 0.356539013 | 0.666159835  | 0.868907648 | 1           | AC092944.3    |
| ENSG00000201441 | 0.61420451  | 0.387220594 | 0.666159835  | 0.868907648 | 1           | RNU6-646P     |
| ENSG00000272243 | 0.61420451  | 0.356539013 | 0.666159835  | 0.868907648 | 1           | AL356277.3    |

|                 |             |             |              |             |             |            |
|-----------------|-------------|-------------|--------------|-------------|-------------|------------|
| ENSG00000231725 | 0.61420451  | 0.387220594 | 0.666159835  | 0.868907648 | 1           | VN1R110P   |
| ENSG00000253438 | 0.61420451  | 0.387220594 | 0.666159835  | 0.868907648 | 1           | PCAT1      |
| ENSG00000148215 | 0.61420451  | 0.356539013 | 0.666159835  | 0.868907648 | 1           | OR5C1      |
| ENSG00000201564 | 0.61420451  | 0.387220594 | 0.666159835  | 0.868907648 | 1           | RN7SKP50   |
| ENSG00000257880 | 0.61420451  | 0.387220594 | 0.666159835  | 0.868907648 | 1           | AC078789.1 |
| ENSG00000261081 | 0.61420451  | 0.387220594 | 0.666159835  | 0.868907648 | 1           | AC025678.2 |
| ENSG00000259346 | 0.61420451  | 0.356539013 | 0.666159835  | 0.868907648 | 1           | AC105129.2 |
| ENSG00000269482 | 0.61420451  | 0.356539013 | 0.666159835  | 0.868907648 | 1           | Z69720.1   |
| ENSG00000239203 | 0.61420451  | 0.387220594 | 0.666159835  | 0.868907648 | 1           | AC093484.1 |
| ENSG00000239671 | 0.61420451  | 0.356539013 | 0.666159835  | 0.868907648 | 1           | AC100793.1 |
| ENSG00000231241 | 0.61420451  | 0.356539013 | 0.666159835  | 0.868907648 | 1           | RPS3AP3    |
| ENSG00000230226 | 0.61420451  | 0.356539013 | 0.666159835  | 0.868907648 | 1           | AL121829.1 |
| ENSG00000267385 | 0.61420451  | 0.356539013 | 0.666159835  | 0.868907648 | 1           | AC011498.4 |
| ENSG00000269139 | 0.61420451  | 0.387220594 | 0.666159835  | 0.868907648 | 1           | AC010336.5 |
| ENSG00000166596 | 1.843867178 | 1.447381022 | 0.348975786  | 0.868954931 | 0.91506043  | CFAP52     |
| ENSG00000276564 | 9.752879255 | 8.795244097 | 0.153683694  | 0.868973651 | 0.91506043  | AC130650.2 |
| ENSG00000137273 | 123.5753563 | 110.8836467 | 0.15687102   | 0.868994313 | 0.91506043  | FOXF2      |
| ENSG00000183150 | 15.17072623 | 13.81862773 | 0.140458151  | 0.869004931 | 0.91506043  | GPR19      |
| ENSG00000165434 | 201.6403747 | 192.6725706 | 0.064508459  | 0.869027407 | 0.91506043  | PGM2L1     |
| ENSG00000007541 | 879.6517101 | 857.16214   | 0.037439273  | 0.869149765 | 0.91515218  | PIGQ       |
| ENSG00000270133 | 2.108131562 | 2.527610546 | -0.257586803 | 0.869430801 | 0.915382708 | AC025766.1 |
| ENSG00000154118 | 3.379378453 | 2.679862578 | 0.344425772  | 0.86943917  | 0.915382708 | JPH3       |
| ENSG00000263826 | 19.1012704  | 17.40421535 | 0.13417476   | 0.869770305 | 0.915678462 | AC112907.3 |
| ENSG00000068323 | 1864.355308 | 1919.57989  | -0.042009366 | 0.869828763 | 0.915678462 | TFE3       |
| ENSG00000212916 | 54.09552732 | 51.13233531 | 0.077380414  | 0.869847876 | 0.915678462 | MAP10      |
| ENSG00000138036 | 316.2488509 | 304.8811416 | 0.051764856  | 0.869865365 | 0.915678462 | DYNC2LI1   |
| ENSG00000119950 | 745.7850703 | 704.4716239 | 0.082545184  | 0.869896301 | 0.915678462 | MXI1       |
| ENSG00000206113 | 3.649911081 | 3.179325408 | 0.18929197   | 0.870119009 | 0.915811495 | CFAP99     |
| ENSG00000263321 | 1.773306493 | 2.261960402 | -0.334016248 | 0.870139339 | 0.915811495 | AC024361.3 |
| ENSG00000160111 | 29.6890965  | 27.25705133 | 0.125600302  | 0.870144704 | 0.915811495 | CPAMD8     |
| ENSG00000272609 | 2.127007565 | 1.793307549 | 0.243979278  | 0.870196634 | 0.915811495 | AC016252.1 |
| ENSG00000165948 | 74.99868158 | 81.059583   | -0.112451245 | 0.870198929 | 0.915811495 | IFI27L1    |
| ENSG00000003987 | 32.08126609 | 30.08009452 | 0.09230149   | 0.870240227 | 0.91581786  | MTMR7      |
| ENSG00000204963 | 4.54474868  | 5.075290187 | -0.154704156 | 0.870339377 | 0.915885105 | PCDHA7     |
| ENSG00000274425 | 2.124500267 | 2.446178286 | -0.217736267 | 0.870484115 | 0.916000316 | AC114271.1 |
| ENSG00000154914 | 11.90259504 | 13.09493722 | -0.136271418 | 0.870667035 | 0.916123604 | USP43      |
| ENSG00000196345 | 1.817398012 | 2.10970837  | -0.226299501 | 0.8706718   | 0.916123604 | ZKSCAN7    |
| ENSG00000169598 | 168.9704196 | 176.1561949 | -0.059093889 | 0.870757363 | 0.916173655 | DFFB       |
| ENSG00000276980 | 22.27343975 | 20.27633976 | 0.138486639  | 0.870789894 | 0.916173655 | AC008760.2 |
| ENSG00000256552 | 0.908699006 | 0.672939833 | 0.401611603  | 0.870838828 | 1           | AC092745.2 |
| ENSG00000223117 | 0.908699006 | 0.672939833 | 0.401611603  | 0.870838828 | 1           | RN7SKP296  |
| ENSG00000228887 | 0.908699006 | 0.672939833 | 0.401611603  | 0.870838828 | 1           | EEF1DP1    |
| ENSG00000258153 | 0.908699006 | 0.672939833 | 0.401611603  | 0.870838828 | 1           | HSPE1P4    |
| ENSG00000229107 | 0.908699006 | 0.672939833 | 0.401611603  | 0.870838828 | 1           | ABHD17AP4  |
| ENSG00000284015 | 1.522903516 | 1.874739808 | -0.285823676 | 0.870907736 | 0.916260535 | MIR1281    |
| ENSG00000223899 | 2.067800989 | 2.496928964 | -0.26601465  | 0.870990571 | 0.916265754 | SEC13P1    |
| ENSG00000262246 | 1.509042109 | 1.844058227 | -0.277304377 | 0.871043478 | 0.916265754 | CORO7      |
| ENSG00000235354 | 1.509042109 | 1.844058227 | -0.277304377 | 0.871043478 | 0.916265754 | RPS29P16   |
| ENSG00000052841 | 1529.368197 | 1484.345844 | 0.043238949  | 0.871053764 | 0.916265754 | TTC17      |
| ENSG00000268743 | 7.197777715 | 6.480221267 | 0.154936639  | 0.871161769 | 0.916342264 | AC008737.1 |
| ENSG00000225693 | 5.169053651 | 4.53581756  | 0.176312149  | 0.871327052 | 0.916479014 | LAGE3P1    |

|                 |             |             |               |             |             |            |
|-----------------|-------------|-------------|---------------|-------------|-------------|------------|
| ENSG00000287146 | 2.66939774  | 2.0188195   | 0.393906207   | 0.871366062 | 0.916482943 | AC000085.1 |
| ENSG00000162415 | 96.36772456 | 103.2174563 | -0.097771542  | 0.871552855 | 0.916642299 | ZSWIM5     |
| novel.1062      | 1.525410814 | 1.874739808 | -0.284099659  | 0.871698286 | 0.916727623 | -          |
| ENSG00000215424 | 85.36706209 | 88.62841574 | -0.05248482   | 0.871704551 | 0.916727623 | MCM3AP-AS1 |
| ENSG00000183783 | 2.712235611 | 3.180481283 | -0.232980693  | 0.871763218 | 0.916752212 | KCTD8      |
| ENSG00000240449 | 12.36307042 | 13.46093284 | -0.117634594  | 0.872106481 | 0.917076071 | AC005586.1 |
| ENSG00000229689 | 25.36925054 | 27.05302114 | -0.091105647  | 0.872232738 | 0.917171716 | AC009237.3 |
| ENSG00000099725 | 291.7049477 | 209.1601229 | 0.479815611   | 0.872396502 | 0.917306792 | PRKY       |
| ENSG00000262304 | 1.495180701 | 1.834601616 | -0.281357543  | 0.872623534 | 0.917508378 | AC027796.3 |
| ENSG00000270257 | 2.653029035 | 2.211209725 | 0.277448345   | 0.872780893 | 0.917632694 | AC096720.1 |
| ENSG00000228737 | 2.137108026 | 1.803920035 | 0.24414501    | 0.872812406 | 0.917632694 | AC008781.1 |
| ENSG00000151748 | 899.7919579 | 880.314491  | 0.031551618   | 0.872887841 | 0.917674868 | SAV1       |
| ENSG00000198898 | 2021.081214 | 1980.065995 | 0.029533333   | 0.872928866 | 0.917680864 | CAPZA2     |
| ENSG00000196433 | 2.446717578 | 2.802717299 | -0.2111039697 | 0.872999014 | 0.917705388 | ASMT       |
| ENSG00000234478 | 3.313832363 | 2.934900236 | 0.188511489   | 0.873022839 | 0.917705388 | ACBD3-AS1  |
| ENSG00000269600 | 4.834228581 | 4.33153058  | 0.162122003   | 0.873083616 | 0.917732145 | AC016629.2 |
| ENSG00000275294 | 3.28360225  | 2.884149558 | 0.194898162   | 0.873120266 | 0.917733539 | LINC02340  |
| ENSG00000090470 | 587.9038251 | 573.7137338 | 0.03511005    | 0.873198229 | 0.917778356 | PDCD7      |
| ENSG00000200419 | 0.921306765 | 1.345879667 | -0.557668526  | 0.873220746 | 1           | RF00019    |
| ENSG00000174516 | 189.9227512 | 183.2431125 | 0.052874044   | 0.873357654 | 0.917908786 | PELI3      |
| ENSG00000149451 | 856.827345  | 823.5940933 | 0.057083162   | 0.873519229 | 0.918041467 | ADAM33     |
| ENSG00000260878 | 3.692748952 | 3.036401591 | 0.291492338   | 0.873725628 | 0.918198402 | AC104072.1 |
| ENSG00000268575 | 29.43679913 | 31.84028034 | -0.11127874   | 0.873739236 | 0.918198402 | AL031282.2 |
| ENSG00000286596 | 0.923814062 | 0.693008929 | 0.39162239    | 0.873800087 | 1           | AC098595.1 |
| ENSG00000287142 | 2.125753916 | 1.762625967 | 0.260772627   | 0.874139889 | 0.918582287 | AL355053.1 |
| ENSG00000247877 | 0.922560414 | 0.693008929 | 0.390135433   | 0.874280928 | 1           | AC021086.1 |
| ENSG00000269749 | 0.922560414 | 0.693008929 | 0.390135433   | 0.874280928 | 1           | AC005614.2 |
| ENSG00000105989 | 0.925067711 | 1.345879667 | -0.552445615  | 0.874375167 | 1           | WNT2       |
| ENSG00000189339 | 1111.203619 | 1144.09506  | -0.041807666  | 0.874601275 | 0.919028591 | SLC35E2B   |
| ENSG00000226107 | 2.153476731 | 1.722487775 | 0.3049528     | 0.874639566 | 0.919028591 | AC004383.1 |
| ENSG00000263105 | 3.381885751 | 2.731897526 | 0.294353805   | 0.87467072  | 0.919028591 | AC009171.2 |
| ENSG00000172650 | 11.18000657 | 12.0985801  | -0.115920618  | 0.874717464 | 0.919040539 | AGAP5      |
| ENSG00000106609 | 2255.590389 | 2310.83029  | -0.034958898  | 0.874771149 | 0.919040791 | TMEM248    |
| ENSG00000271781 | 4.908550213 | 5.54522731  | -0.188764737  | 0.874788452 | 0.919040791 | AC026740.1 |
| ENSG00000256571 | 1.789675198 | 2.231278821 | -0.305163706  | 0.874850754 | 0.919069081 | AC079866.2 |
| ENSG00000182749 | 494.0718985 | 508.7302916 | -0.041575255  | 0.874900742 | 0.919084432 | PAQR7      |
| ENSG00000245667 | 6.961236146 | 7.672564631 | -0.133490956  | 0.874962198 | 0.919111829 | AC006064.1 |
| ENSG00000203910 | 3.01557692  | 2.455634897 | 0.290889253   | 0.875014393 | 0.919129496 | C1orf146   |
| ENSG00000279852 | 2.391271949 | 2.822786395 | -0.241043538  | 0.875108088 | 0.919190751 | AC083964.2 |
| ENSG00000285646 | 9.00131432  | 8.305366273 | 0.121754262   | 0.87520256  | 0.919252819 | AL021155.2 |
| ENSG00000261334 | 1.773306493 | 2.231278821 | -0.317149388  | 0.875327329 | 0.919346701 | AL353803.4 |
| ENSG00000275328 | 4.105371866 | 3.168712922 | 0.373592611   | 0.875372383 | 0.919356855 | SPDYE19P   |
| ENSG00000171492 | 590.8711487 | 620.3771626 | -0.070751107  | 0.875442559 | 0.919359353 | LRRC8D     |
| ENSG00000023287 | 996.4080919 | 963.6485819 | 0.048547463   | 0.875472289 | 0.919359353 | RB1CC1     |
| ENSG00000128694 | 187.9904872 | 181.1369186 | 0.052554056   | 0.875497514 | 0.919359353 | OSGEPL1    |
| ENSG00000255524 | 4.441450584 | 5.115428379 | -0.192865178  | 0.875516305 | 0.919359353 | NPIP8      |
| ENSG00000188343 | 461.2081535 | 473.8142419 | -0.038541383  | 0.875612722 | 0.919423438 | FAM92A     |
| ENSG00000181827 | 377.0549263 | 366.7478124 | 0.0401147     | 0.875739905 | 0.919512706 | REFX7      |
| ENSG00000050393 | 693.5449347 | 709.6979668 | -0.033553706  | 0.87576852  | 0.919512706 | MCUR1      |
| ENSG00000261076 | 2.150969433 | 1.753169357 | 0.282794731   | 0.875944818 | 0.919648881 | AC016396.2 |
| ENSG00000224490 | 2.123246619 | 1.823989131 | 0.22701522    | 0.87596901  | 0.919648881 | TTC21B-AS1 |

|                 |             |             |              |             |             |            |
|-----------------|-------------|-------------|--------------|-------------|-------------|------------|
| ENSG00000233559 | 16.8309189  | 15.55070051 | 0.111375465  | 0.876088346 | 0.919737002 | LINC00513  |
| ENSG00000163428 | 1158.163298 | 1187.553336 | -0.03601291  | 0.876355204 | 0.919964674 | LRRRC58    |
| ENSG00000269318 | 6.621396481 | 7.388001267 | -0.146676518 | 0.876379178 | 0.919964674 | AC007292.2 |
| ENSG00000159592 | 1387.838544 | 1418.853529 | -0.031746056 | 0.876411441 | 0.919964674 | GPBP1L1    |
| ENSG00000175105 | 324.482232  | 334.6500411 | -0.043771052 | 0.876466637 | 0.919985444 | ZNF654     |
| ENSG00000277959 | 14.63084335 | 15.88704203 | -0.114161271 | 0.876509479 | 0.919989772 | AL162274.2 |
| ENSG00000274713 | 1.466204238 | 1.10029862  | 0.424851235  | 0.876543675 | 1           | MIR7974    |
| ENSG00000231871 | 5.174068246 | 5.716392564 | -0.148044988 | 0.876565796 | 0.919989772 | IPO9-AS1   |
| ENSG00000230010 | 1.801029308 | 2.231278821 | -0.297469179 | 0.876597043 | 0.919989772 | AL049646.1 |
| ENSG00000251520 | 1.480065645 | 1.874739808 | -0.323102705 | 0.876636447 | 0.919989772 | AL162431.3 |
| ENSG00000235253 | 2.406387005 | 2.944356846 | -0.284383615 | 0.876647811 | 0.919989772 | AC010240.2 |
| ENSG00000228459 | 9.120981121 | 10.4126345  | -0.186685174 | 0.876728233 | 0.920037007 | LINC01546  |
| ENSG00000255355 | 1.493927053 | 1.874739808 | -0.311147748 | 0.876818457 | 0.920077165 | AP000640.2 |
| ENSG00000198692 | 209.4100749 | 288.6012065 | -0.462813018 | 0.876837327 | 0.920077165 | EIF1AY     |
| ENSG00000224993 | 0.908699006 | 0.723690511 | 0.333694208  | 0.877056487 | 1           | RPL29P12   |
| ENSG00000069943 | 158.0615151 | 163.0667327 | -0.045648339 | 0.877121513 | 0.920338195 | PIGB       |
| ENSG00000179085 | 563.5136201 | 577.626301  | -0.035624981 | 0.877162503 | 0.920344035 | DPM3       |
| ENSG00000197627 | 2.095523804 | 1.803920035 | 0.224113466  | 0.877254634 | 0.920403531 | UBE2Q2P12  |
| ENSG00000260651 | 5.162714136 | 5.686866857 | -0.144865378 | 0.877600011 | 0.920711843 | AF213884.3 |
| ENSG00000139364 | 1258.856401 | 1157.087628 | 0.121745209  | 0.877672525 | 0.920711843 | TMEM132B   |
| ENSG00000169402 | 2.109385211 | 1.823989131 | 0.220656769  | 0.877682384 | 0.920711843 | RSPH10B2   |
| ENSG00000249471 | 95.01657198 | 98.64133777 | -0.055426075 | 0.877690244 | 0.920711843 | ZNF324B    |
| ENSG00000132259 | 6.626411076 | 6.001983409 | 0.158825915  | 0.877788286 | 0.920777513 | CNGA4      |
| ENSG00000259618 | 1.773306493 | 2.140389951 | -0.265072116 | 0.877859329 | 0.920804831 | AC012170.3 |
| ENSG00000285704 | 3.532751578 | 2.832243005 | 0.319443893  | 0.877885211 | 0.920804831 | AC004765.1 |
| ENSG00000110108 | 1998.384364 | 1922.957332 | 0.055348333  | 0.878143844 | 0.921022221 | TMEM109    |
| ENSG00000278535 | 4.499403511 | 4.993857928 | -0.149177736 | 0.878163367 | 0.921022221 | DHRS11     |
| ENSG00000227071 | 1.774560141 | 2.140389951 | -0.264308986 | 0.878214977 | 0.921039169 | FOCAD-AS1  |
| ENSG00000261886 | 1.804790254 | 1.456837632 | 0.315028036  | 0.878458429 | 0.921257304 | AC005670.1 |
| ENSG00000275703 | 5.18166141  | 5.819049794 | -0.165051276 | 0.878628694 | 0.921398672 | U47924.3   |
| ENSG00000010539 | 180.4679136 | 175.3835043 | 0.041532522  | 0.878742066 | 0.921453762 | ZNF200     |
| ENSG00000249679 | 12.93311214 | 13.90018839 | -0.104453805 | 0.878771557 | 0.921453762 | AC106897.1 |
| novel.437       | 91.03183547 | 86.26397368 | 0.076632663  | 0.878787626 | 0.921453762 | -          |
| ENSG00000092036 | 213.3717323 | 206.3207225 | 0.047648342  | 0.879006883 | 0.921583599 | HAUS4      |
| ENSG00000275401 | 3.308817768 | 2.833398881 | 0.220955813  | 0.879007956 | 0.921583599 | AL391095.3 |
| ENSG00000232406 | 1.201939854 | 1.436768536 | -0.253208672 | 0.879019381 | 1           | AL121895.1 |
| ENSG00000064115 | 1006.243384 | 968.8300944 | 0.05433855   | 0.879024619 | 0.921583599 | TM7SF3     |
| ENSG00000091164 | 1183.165666 | 1212.530311 | -0.035411282 | 0.879075518 | 0.921583599 | TXNL1      |
| novel.345       | 4.193554905 | 4.911141399 | -0.214255422 | 0.879088809 | 0.921583599 | -          |
| ENSG00000134962 | 5.951746342 | 6.64552593  | -0.161817926 | 0.879136922 | 0.921596852 | KLB        |
| ENSG00000264647 | 0.909952655 | 0.693008929 | 0.374937101  | 0.879194372 | 1           | AC104564.4 |
| ENSG00000207452 | 0.909952655 | 0.693008929 | 0.374937101  | 0.879194372 | 1           | RNU6-606P  |
| ENSG00000144285 | 2.098031101 | 2.476859868 | -0.240776609 | 0.879249438 | 0.921677613 | SCN1A      |
| ENSG00000237872 | 1.535511275 | 1.069617038 | 0.518570812  | 0.879302762 | 1           | POU5F1P4   |
| ENSG00000240793 | 2.135854377 | 1.753169357 | 0.274456404  | 0.879522483 | 0.921926638 | UBA52P8    |
| ENSG00000109320 | 1001.597047 | 1025.652483 | -0.034204922 | 0.879603024 | 0.921973864 | NFKB1      |
| ENSG00000280420 | 1.466204238 | 1.110911105 | 0.414015882  | 0.879639189 | 1           | AC005355.2 |
| ENSG00000103264 | 601.6102839 | 614.8049528 | -0.031513364 | 0.879894342 | 0.922242008 | FBXO31     |
| ENSG00000118816 | 4062.040488 | 4188.394062 | -0.044158473 | 0.879944019 | 0.922256871 | CCNI       |
| ENSG00000229786 | 1.521649867 | 1.161661783 | 0.407495694  | 0.880002971 | 0.922281452 | SNRPPF2    |
| ENSG00000148296 | 0.907445357 | 0.693008929 | 0.37194531   | 0.880162247 | 1           | SURF6      |

|                 |             |             |              |             |             |             |
|-----------------|-------------|-------------|--------------|-------------|-------------|-------------|
| ENSG00000240853 | 0.907445357 | 0.693008929 | 0.37194531   | 0.880162247 | 1           | RN7SL328P   |
| ENSG00000227638 | 3.65116473  | 3.199394504 | 0.184188435  | 0.880193075 | 0.922406679 | HNRNPA1P14  |
| novel.421       | 155.8440307 | 150.3109627 | 0.053023204  | 0.880218845 | 0.922406679 | -           |
| ENSG00000254756 | 3.286109548 | 3.954922472 | -0.264329684 | 0.880228967 | 0.922406679 | AP001107.6  |
| ENSG00000238184 | 11.82193389 | 10.89202823 | 0.121124603  | 0.880284583 | 0.922427754 | CD81-AS1    |
| ENSG00000249236 | 1.186824798 | 1.518200796 | -0.332538942 | 0.880344409 | 0.92245324  | AC008892.1  |
| ENSG00000206013 | 0.586481695 | 0.356539013 | 0.608269327  | 0.880363023 | 1           | IFITM5      |
| ENSG00000244541 | 0.586481695 | 0.387220594 | 0.608269327  | 0.880363023 | 1           | LINC01213   |
| ENSG00000230126 | 0.586481695 | 0.356539013 | 0.608269327  | 0.880363023 | 1           | FGF12-AS2   |
| ENSG00000227484 | 0.586481695 | 0.387220594 | 0.608269327  | 0.880363023 | 1           | CR559946.1  |
| ENSG00000206150 | 0.586481695 | 0.356539013 | 0.608269327  | 0.880363023 | 1           | RNASE13     |
| ENSG00000267890 | 0.586481695 | 0.356539013 | 0.608269327  | 0.880363023 | 1           | AC010624.2  |
| ENSG00000251748 | 0.586481695 | 0.356539013 | 0.608269327  | 0.880363023 | 1           | RNU4ATAC11P |
| ENSG00000227560 | 0.586481695 | 0.387220594 | 0.608269327  | 0.880363023 | 1           | RPS15AP30   |
| ENSG00000263590 | 0.586481695 | 0.356539013 | 0.608269327  | 0.880363023 | 1           | LINC02591   |
| ENSG00000285688 | 0.586481695 | 0.356539013 | 0.608269327  | 0.880363023 | 1           | AL161443.1  |
| ENSG00000273336 | 0.586481695 | 0.387220594 | 0.608269327  | 0.880363023 | 1           | OR7M1P      |
| ENSG00000175604 | 0.586481695 | 0.387220594 | 0.608269327  | 0.880363023 | 1           | AC007601.1  |
| ENSG00000279827 | 0.586481695 | 0.356539013 | 0.608269327  | 0.880363023 | 1           | AC136469.2  |
| ENSG00000158874 | 0.586481695 | 0.387220594 | 0.608269327  | 0.880363023 | 1           | APOA2       |
| ENSG00000206728 | 0.586481695 | 0.356539013 | 0.608269327  | 0.880363023 | 1           | RF00019     |
| ENSG00000272219 | 0.586481695 | 0.356539013 | 0.608269327  | 0.880363023 | 1           | AC005072.1  |
| ENSG00000254467 | 0.586481695 | 0.387220594 | 0.608269327  | 0.880363023 | 1           | AP002765.1  |
| ENSG00000251579 | 0.586481695 | 0.356539013 | 0.608269327  | 0.880363023 | 1           | AC055733.3  |
| ENSG00000278880 | 0.586481695 | 0.387220594 | 0.608269327  | 0.880363023 | 1           | AC092608.2  |
| ENSG00000253454 | 0.586481695 | 0.387220594 | 0.608269327  | 0.880363023 | 1           | NDUFA5P2    |
| ENSG00000203897 | 0.586481695 | 0.356539013 | 0.608269327  | 0.880363023 | 1           | SPATA42     |
| ENSG00000239626 | 0.586481695 | 0.387220594 | 0.608269327  | 0.880363023 | 1           | RPSAP41     |
| ENSG00000255492 | 0.586481695 | 0.387220594 | 0.608269327  | 0.880363023 | 1           | AC104383.1  |
| ENSG00000231169 | 0.586481695 | 0.356539013 | 0.608269327  | 0.880363023 | 1           | EEF1B2P1    |
| ENSG00000228386 | 0.586481695 | 0.356539013 | 0.608269327  | 0.880363023 | 1           | AL031668.1  |
| ENSG00000231163 | 0.586481695 | 0.356539013 | 0.608269327  | 0.880363023 | 1           | CSMD2-AS1   |
| ENSG00000124835 | 0.586481695 | 0.387220594 | 0.608269327  | 0.880363023 | 1           | AC105760.1  |
| ENSG00000287626 | 0.586481695 | 0.356539013 | 0.608269327  | 0.880363023 | 1           | AL021978.1  |
| ENSG00000264314 | 0.586481695 | 0.387220594 | 0.608269327  | 0.880363023 | 1           | MIR548AT    |
| ENSG00000266977 | 0.586481695 | 0.356539013 | 0.608269327  | 0.880363023 | 1           | AC006504.2  |
| ENSG00000225931 | 0.586481695 | 0.356539013 | 0.608269327  | 0.880363023 | 1           | AL139246.2  |
| ENSG00000199562 | 0.586481695 | 0.387220594 | 0.608269327  | 0.880363023 | 1           | RNU6-37P    |
| ENSG00000287587 | 0.586481695 | 0.356539013 | 0.608269327  | 0.880363023 | 1           | AL158216.1  |
| ENSG00000233647 | 0.586481695 | 0.387220594 | 0.608269327  | 0.880363023 | 1           | NENFP1      |
| ENSG00000239873 | 0.586481695 | 0.387220594 | 0.608269327  | 0.880363023 | 1           | GAPDHP27    |
| ENSG00000237007 | 0.586481695 | 0.356539013 | 0.608269327  | 0.880363023 | 1           | KRT18P52    |
| ENSG00000224967 | 0.586481695 | 0.356539013 | 0.608269327  | 0.880363023 | 1           | AC009303.1  |
| ENSG00000232328 | 0.586481695 | 0.356539013 | 0.608269327  | 0.880363023 | 1           | AC084030.1  |
| ENSG00000201229 | 0.586481695 | 0.387220594 | 0.608269327  | 0.880363023 | 1           | SNORA63D    |
| ENSG00000249699 | 0.586481695 | 0.387220594 | 0.608269327  | 0.880363023 | 1           | LINC02261   |
| ENSG00000252951 | 0.586481695 | 0.387220594 | 0.608269327  | 0.880363023 | 1           | RNA5SP165   |
| ENSG00000269985 | 0.586481695 | 0.356539013 | 0.608269327  | 0.880363023 | 1           | AL021328.1  |
| ENSG00000199630 | 0.586481695 | 0.356539013 | 0.608269327  | 0.880363023 | 1           | RF00019     |
| ENSG00000203809 | 0.586481695 | 0.356539013 | 0.608269327  | 0.880363023 | 1           | LIN28B-AS1  |
| ENSG00000230914 | 0.586481695 | 0.356539013 | 0.608269327  | 0.880363023 | 1           | AC004840.1  |

|                 |             |             |              |             |             |             |
|-----------------|-------------|-------------|--------------|-------------|-------------|-------------|
| ENSG00000233108 | 0.586481695 | 0.356539013 | 0.608269327  | 0.880363023 | 1           | AC006042.2  |
| ENSG00000169906 | 0.586481695 | 0.387220594 | 0.608269327  | 0.880363023 | 1           | S100G       |
| ENSG00000201592 | 0.586481695 | 0.356539013 | 0.608269327  | 0.880363023 | 1           | RF00494     |
| ENSG00000276575 | 0.586481695 | 0.387220594 | 0.608269327  | 0.880363023 | 1           | MIR6895     |
| ENSG00000253579 | 0.586481695 | 0.356539013 | 0.608269327  | 0.880363023 | 1           | SUMO2P16    |
| ENSG00000253416 | 0.586481695 | 0.356539013 | 0.608269327  | 0.880363023 | 1           | AC023200.1  |
| ENSG00000253526 | 0.586481695 | 0.387220594 | 0.608269327  | 0.880363023 | 1           | AC090802.1  |
| ENSG00000253619 | 0.586481695 | 0.387220594 | 0.608269327  | 0.880363023 | 1           | AC068413.1  |
| ENSG00000254428 | 0.586481695 | 0.356539013 | 0.608269327  | 0.880363023 | 1           | AP003392.1  |
| ENSG00000175728 | 0.586481695 | 0.356539013 | 0.608269327  | 0.880363023 | 1           | C11orf44    |
| ENSG00000252994 | 0.586481695 | 0.387220594 | 0.608269327  | 0.880363023 | 1           | RNU6-1231P  |
| ENSG00000287928 | 0.586481695 | 0.387220594 | 0.608269327  | 0.880363023 | 1           | AC007535.1  |
| ENSG00000251756 | 0.586481695 | 0.356539013 | 0.608269327  | 0.880363023 | 1           | RNA5SP385   |
| ENSG00000199914 | 0.586481695 | 0.356539013 | 0.608269327  | 0.880363023 | 1           | SNORD114-16 |
| ENSG00000199025 | 0.586481695 | 0.387220594 | 0.608269327  | 0.880363023 | 1           | MIR369      |
| ENSG00000279123 | 0.586481695 | 0.387220594 | 0.608269327  | 0.880363023 | 1           | AC027281.2  |
| ENSG00000287457 | 0.586481695 | 0.387220594 | 0.608269327  | 0.880363023 | 1           | AC005821.2  |
| ENSG00000266938 | 0.586481695 | 0.356539013 | 0.608269327  | 0.880363023 | 1           | AC119403.2  |
| ENSG00000267771 | 0.586481695 | 0.387220594 | 0.608269327  | 0.880363023 | 1           | AC011447.4  |
| ENSG00000253021 | 0.586481695 | 0.387220594 | 0.608269327  | 0.880363023 | 1           | RNU6-902P   |
| novel.347       | 0.586481695 | 0.336469917 | 0.608269327  | 0.880363023 | 1           | -           |
| ENSG00000221562 | 0.586481695 | 0.336469917 | 0.608269327  | 0.880363023 | 1           | RNU6ATAC10P |
| ENSG00000286553 | 0.586481695 | 0.336469917 | 0.608269327  | 0.880363023 | 1           | AL357075.3  |
| ENSG00000228038 | 0.586481695 | 0.336469917 | 0.608269327  | 0.880363023 | 1           | VN1R51P     |
| ENSG00000231795 | 0.586481695 | 0.336469917 | 0.608269327  | 0.880363023 | 1           | ITCH-IT1    |
| ENSG00000267627 | 0.586481695 | 0.336469917 | 0.608269327  | 0.880363023 | 1           | AC118757.1  |
| ENSG00000250765 | 0.586481695 | 0.336469917 | 0.608269327  | 0.880363023 | 1           | AC138035.2  |
| ENSG00000230371 | 0.586481695 | 0.336469917 | 0.608269327  | 0.880363023 | 1           | KARSP2      |
| ENSG00000206781 | 0.586481695 | 0.336469917 | 0.608269327  | 0.880363023 | 1           | RF00019     |
| ENSG00000219790 | 0.586481695 | 0.336469917 | 0.608269327  | 0.880363023 | 1           | OSTCP6      |
| ENSG00000234806 | 0.586481695 | 0.336469917 | 0.608269327  | 0.880363023 | 1           | RPL26P29    |
| ENSG00000228484 | 0.586481695 | 0.336469917 | 0.608269327  | 0.880363023 | 1           | AL137025.1  |
| ENSG00000231905 | 0.586481695 | 0.336469917 | 0.608269327  | 0.880363023 | 1           | SETP10      |
| ENSG00000236430 | 0.586481695 | 0.336469917 | 0.608269327  | 0.880363023 | 1           | KRT8P29     |
| ENSG00000277948 | 0.586481695 | 0.336469917 | 0.608269327  | 0.880363023 | 1           | RF02271     |
| ENSG00000263641 | 0.586481695 | 0.336469917 | 0.608269327  | 0.880363023 | 1           | MIR4777     |
| ENSG00000222627 | 0.586481695 | 0.336469917 | 0.608269327  | 0.880363023 | 1           | RNU2-37P    |
| ENSG00000287164 | 0.586481695 | 0.336469917 | 0.608269327  | 0.880363023 | 1           | AC112254.1  |
| ENSG00000201533 | 0.586481695 | 0.336469917 | 0.608269327  | 0.880363023 | 1           | RN7SKP237   |
| ENSG00000211747 | 0.586481695 | 0.336469917 | 0.608269327  | 0.880363023 | 1           | TRBV20-1    |
| ENSG00000239468 | 0.586481695 | 0.336469917 | 0.608269327  | 0.880363023 | 1           | RN7SL569P   |
| ENSG00000249898 | 0.586481695 | 0.336469917 | 0.608269327  | 0.880363023 | 1           | MCPH1-AS1   |
| ENSG00000213315 | 0.586481695 | 0.336469917 | 0.608269327  | 0.880363023 | 1           | AL122020.1  |
| ENSG00000260452 | 0.586481695 | 0.336469917 | 0.608269327  | 0.880363023 | 1           | TPRKBP2     |
| ENSG00000129625 | 2265.832735 | 2322.223416 | -0.035586624 | 0.880475591 | 0.92252676  | REEP5       |
| ENSG00000275769 | 1.21705491  | 1.487519214 | -0.276541337 | 0.880485588 | 0.92252676  | AC068792.1  |
| ENSG00000198464 | 219.793129  | 227.7095957 | -0.05135003  | 0.880729275 | 0.922744871 | ZNF480      |
| ENSG00000249633 | 1.188078446 | 1.518200796 | -0.331363693 | 0.88076613  | 0.922746273 | OR52V1P     |
| ENSG00000185689 | 14.37918673 | 13.3688881  | 0.109479609  | 0.880925848 | 0.922876389 | C6orf201    |
| ENSG00000178935 | 71.03963132 | 74.24104647 | -0.065026945 | 0.881059643 | 0.922979339 | ZNF552      |
| ENSG00000286311 | 5.204298358 | 4.585412363 | 0.173438403  | 0.881296869 | 0.923190628 | AL034550.3  |



|                 |             |             |              |             |             |            |
|-----------------|-------------|-------------|--------------|-------------|-------------|------------|
| ENSG00000146904 | 1.845120827 | 1.4981317   | 0.310986112  | 0.881422211 | 0.923283937 | EPHA1      |
| ENSG00000160007 | 2980.86012  | 3106.996622 | -0.059696461 | 0.881457018 | 0.923283937 | ARHGAP35   |
| ENSG00000115392 | 231.3306257 | 225.3896113 | 0.03651152   | 0.881603858 | 0.923392808 | FANCL      |
| ENSG00000236780 | 6.335677526 | 5.777755727 | 0.13670782   | 0.881632038 | 0.923392808 | LINC01829  |
| ENSG00000260778 | 16.6158319  | 17.65095227 | -0.091947907 | 0.881872321 | 0.923607239 | AC009065.4 |
| ENSG00000070214 | 1424.946185 | 1359.537542 | 0.067599224  | 0.882273376 | 0.923990027 | SLC44A1    |
| ENSG00000236936 | 1.759445085 | 2.191140629 | -0.304600654 | 0.88232187  | 0.923996542 | AL031005.1 |
| ENSG00000261542 | 13.42417364 | 14.30863395 | -0.095684243 | 0.882370009 | 0.923996542 | AC011978.2 |
| ENSG00000270392 | 29.90647733 | 31.65953008 | -0.07845036  | 0.88238629  | 0.923996542 | PFN1P2     |
| ENSG00000213440 | 2.06654734  | 2.557136252 | -0.298539646 | 0.882451457 | 0.924027539 | H2AFZP1    |
| ENSG00000254461 | 17.81909667 | 16.33575419 | 0.123686915  | 0.882554258 | 0.92409794  | AP001107.4 |
| ENSG00000259314 | 2.128261214 | 2.609042805 | -0.286181774 | 0.882655164 | 0.924147499 | AC103739.2 |
| ENSG00000274317 | 1.850135422 | 1.406086955 | 0.388393651  | 0.88267273  | 0.924147499 | LINC02334  |
| ENSG00000160679 | 1495.483506 | 1464.472034 | 0.030261868  | 0.882848691 | 0.924282765 | CHTOP      |
| ENSG00000232454 | 1.814890715 | 1.487519214 | 0.299096601  | 0.882889117 | 0.924282765 | AL138752.1 |
| ENSG00000287067 | 3.253372138 | 2.679862578 | 0.29572859   | 0.882908651 | 0.924282765 | AC106791.3 |
| ENSG00000079215 | 1585.954619 | 1494.711577 | 0.085557942  | 0.883144121 | 0.924492018 | SLC1A3     |
| ENSG00000170442 | 3.638556971 | 4.12852787  | -0.195174702 | 0.88329669  | 0.924608875 | KRT86      |
| novel.366       | 1.7871679   | 2.10970837  | -0.241113411 | 0.883326927 | 0.924608875 | -          |
| ENSG00000136770 | 853.6304006 | 876.6266913 | -0.038678462 | 0.883387971 | 0.92463552  | DNAJC1     |
| ENSG00000203705 | 280.5906705 | 287.8974785 | -0.037654468 | 0.883528928 | 0.924745803 | TATDN3     |
| ENSG00000140299 | 1303.012048 | 1326.682151 | -0.025935798 | 0.883621708 | 0.924805656 | BNIP2      |
| ENSG00000255692 | 2.052685933 | 2.51699806  | -0.286544039 | 0.88380186  | 0.924956943 | AC002563.1 |
| ENSG00000136603 | 1175.844161 | 1211.798447 | -0.043628859 | 0.883973935 | 0.925099767 | SKIL       |
| ENSG00000139190 | 244.0770575 | 238.4438496 | 0.034400429  | 0.884095394 | 0.925179771 | VAMP1      |
| ENSG00000260337 | 0.923814062 | 0.672939833 | 0.430581767  | 0.884157089 | 1           | AC091544.4 |
| ENSG00000263563 | 0.923814062 | 0.672939833 | 0.430581767  | 0.884157089 | 1           | UBBP4      |
| ENSG00000188710 | 7.654776883 | 8.448161695 | -0.138570415 | 0.8841694   | 0.925179771 | QRFP       |
| ENSG00000004866 | 284.5949943 | 294.2902314 | -0.048706488 | 0.88422618  | 0.925179771 | ST7        |
| novel.956       | 107.1072707 | 127.7758258 | -0.25472097  | 0.884227332 | 0.925179771 | -          |
| ENSG00000227161 | 1.493927053 | 1.844058227 | -0.29213557  | 0.884228432 | 0.925179771 | AC092755.1 |
| ENSG00000227145 | 0.922560414 | 0.672939833 | 0.428947696  | 0.884603412 | 1           | IL21-AS1   |
| novel.424       | 63.34244349 | 60.53273473 | 0.067339754  | 0.884649692 | 0.925514331 | -          |
| ENSG00000120942 | 359.0631261 | 369.727778  | -0.042670651 | 0.884676105 | 0.925514331 | UBIAD1     |
| ENSG00000164050 | 1115.326614 | 1092.037003 | 0.030428     | 0.884719256 | 0.925514331 | PLXNB1     |
| ENSG00000241568 | 1.493927053 | 1.773238453 | -0.246917051 | 0.884726297 | 0.925514331 | RN7SL338P  |
| ENSG00000249293 | 1.493927053 | 1.773238453 | -0.246917051 | 0.884726297 | 0.925514331 | AC091868.2 |
| ENSG00000270503 | 1.833766717 | 2.10970837  | -0.215903018 | 0.884856978 | 0.925613767 | YTHDF2P1   |
| ENSG00000278291 | 6.08527455  | 6.656138415 | -0.139246234 | 0.884893659 | 0.92561487  | AL161772.1 |
| ENSG00000226174 | 24.11186506 | 23.02128991 | 0.069199237  | 0.884963006 | 0.925650141 | TEX22      |
| novel.22        | 0.894837599 | 0.693008929 | 0.356650414  | 0.885108943 | 1           | -          |
| ENSG00000270781 | 0.894837599 | 0.693008929 | 0.356650414  | 0.885108943 | 1           | AC091133.5 |
| ENSG00000236256 | 0.894837599 | 0.693008929 | 0.356650414  | 0.885108943 | 1           | DIAPH2-AS1 |
| ENSG00000255606 | 0.894837599 | 0.693008929 | 0.356650414  | 0.885108943 | 1           | AP000439.1 |
| ENSG00000184507 | 0.894837599 | 0.693008929 | 0.356650414  | 0.885108943 | 1           | NUTM1      |
| ENSG00000207217 | 0.894837599 | 0.693008929 | 0.356650414  | 0.885108943 | 1           | SNORA80D   |
| ENSG00000187325 | 518.038197  | 507.2662273 | 0.029884282  | 0.885117592 | 0.925774563 | TAF9B      |
| ENSG00000135686 | 940.326693  | 967.7875595 | -0.041233857 | 0.885197154 | 0.925820509 | KLHL36     |
| ENSG00000277049 | 0.908699006 | 1.130980201 | -0.292886075 | 0.885336587 | 1           | RNA5SP530  |
| ENSG00000287535 | 1.804790254 | 2.200597239 | -0.278987727 | 0.885494771 | 0.926094503 | AC009630.4 |
| ENSG00000287895 | 3.035706571 | 2.649180997 | 0.214592451  | 0.885635049 | 0.926203929 | AL136379.2 |

|                 |             |             |              |             |             |              |
|-----------------|-------------|-------------|--------------|-------------|-------------|--------------|
| ENSG00000196104 | 4.899703401 | 4.037639    | 0.268110493  | 0.885725764 | 0.926261515 | SPOCK3       |
| ENSG00000286028 | 0.908699006 | 0.743759607 | 0.30945378   | 0.885799807 | 1           | AP002008.4   |
| ENSG00000198237 | 0.908699006 | 0.743759607 | 0.30945378   | 0.885799807 | 1           | AC131392.1   |
| ENSG00000256073 | 68.0910676  | 70.98619657 | -0.063156416 | 0.885806273 | 0.926293208 | URB1-AS1     |
| ENSG00000260932 | 1.759445085 | 1.41669944  | 0.315648658  | 0.885840391 | 0.926293208 | AC009119.3   |
| ENSG00000272892 | 2.157237677 | 1.742556871 | 0.295663492  | 0.885863029 | 0.926293208 | AL133551.1   |
| ENSG00000268884 | 1.466204238 | 1.130980201 | 0.392120361  | 0.88591836  | 1           | AC010323.2   |
| ENSG00000286245 | 1.466204238 | 1.130980201 | 0.392120361  | 0.88591836  | 1           | AC125437.3   |
| ENSG00000082497 | 4.911057511 | 4.037639    | 0.271545414  | 0.886011252 | 0.926388266 | SERTAD4      |
| ENSG00000149292 | 190.9389359 | 196.7825236 | -0.04349288  | 0.88602525  | 0.926388266 | TTC12        |
| ENSG00000240006 | 3.254625787 | 2.71182843  | 0.253126161  | 0.886168342 | 0.926500591 | LINC02004    |
| ENSG00000148835 | 109.8820191 | 112.6615556 | -0.036076868 | 0.886231182 | 0.926504594 | TAF5         |
| ENSG00000258917 | 2.388764651 | 2.772035718 | -0.222042918 | 0.886243492 | 0.926504594 | ZMYND19P1    |
| ENSG00000259984 | 1.186824798 | 1.487519214 | -0.308259546 | 0.886343982 | 1           | AL928711.1   |
| ENSG00000100647 | 1054.126359 | 1019.880399 | 0.047671555  | 0.886438386 | 0.926671054 | SUSD6        |
| ENSG00000155158 | 241.5239926 | 248.1498274 | -0.039526744 | 0.88655527  | 0.926755954 | TTC39B       |
| ENSG00000169981 | 3.648657432 | 3.291439249 | 0.156668685  | 0.886627189 | 0.926793844 | ZNF35        |
| ENSG00000240520 | 0.923814062 | 0.723690511 | 0.35079074   | 0.886664936 | 1           | UOX          |
| ENSG00000237292 | 0.923814062 | 0.723690511 | 0.35079074   | 0.886664936 | 1           | LINC01732    |
| ENSG00000258661 | 2.152223082 | 2.496928964 | -0.221770136 | 0.886709918 | 0.926843032 | AL079303.1   |
| ENSG00000148925 | 524.4043894 | 539.4925852 | -0.041557302 | 0.886822626 | 0.926923548 | BTBD10       |
| ENSG00000249741 | 11.97809905 | 13.28874011 | -0.155298402 | 0.887081816 | 0.92710489  | AC093890.1   |
| ENSG00000214253 | 1999.795095 | 1948.04967  | 0.037802518  | 0.887108345 | 0.92710489  | FIS1         |
| ENSG00000239486 | 6.597434613 | 7.214524263 | -0.123699174 | 0.887129038 | 0.92710489  | AC091390.3   |
| ENSG00000114744 | 576.0144786 | 592.59376   | -0.041469704 | 0.887160753 | 0.92710489  | COMMD2       |
| ENSG00000086102 | 978.5106718 | 958.0023581 | 0.030502536  | 0.887192989 | 0.92710489  | NFX1         |
| novel.392       | 106.0170923 | 103.0692326 | 0.041579015  | 0.887210226 | 0.92710489  | -            |
| ENSG00000257557 | 21.54798798 | 20.22687335 | 0.094850402  | 0.887440409 | 0.927286291 | PPP1R12A-AS1 |
| ENSG00000223509 | 8.280335503 | 7.339690734 | 0.166552957  | 0.88746435  | 0.927286291 | AC135983.2   |
| ENSG00000133393 | 93.0075072  | 99.12829591 | -0.091180085 | 0.887518238 | 0.927286291 | FOPNL        |
| ENSG00000276334 | 37.67053582 | 36.207116   | 0.061132261  | 0.887526584 | 0.927286291 | AL133243.2   |
| novel.701       | 4.23263183  | 4.718751175 | -0.151577183 | 0.88759585  | 0.927321368 | -            |
| ENSG00000251330 | 1.835020366 | 2.160459047 | -0.237891093 | 0.887689948 | 0.927382385 | AC114939.1   |
| ENSG00000236489 | 1.188078446 | 1.436768536 | -0.265943877 | 0.887783537 | 1           | AC133473.1   |
| ENSG00000229999 | 1.188078446 | 1.436768536 | -0.265943877 | 0.887783537 | 1           | AL022238.2   |
| ENSG00000265413 | 8.106476721 | 7.469561921 | 0.116956527  | 0.887839237 | 0.927493757 | AP001094.2   |
| ENSG00000271086 | 2.666890443 | 2.231278821 | 0.270310637  | 0.887867951 | 0.927493757 | NAMA         |
| ENSG00000244161 | 24.96261114 | 26.40592978 | -0.077236772 | 0.887950856 | 0.927543068 | FLNB-AS1     |
| ENSG00000147604 | 14470.5552  | 14771.64286 | -0.029723652 | 0.888051175 | 0.927610565 | RPL7         |
| ENSG00000272735 | 2.152223082 | 2.609042805 | -0.272480997 | 0.888334243 | 0.927868938 | AC007881.3   |
| ENSG00000078018 | 1164.799338 | 1121.418146 | 0.054585617  | 0.888486883 | 0.927954639 | MAP2         |
| ENSG00000286627 | 0.908699006 | 0.713078025 | 0.345444601  | 0.888507323 | 1           | AP005900.1   |
| ENSG00000252334 | 0.908699006 | 0.713078025 | 0.345444601  | 0.888507323 | 1           | RNU6-1337P   |
| ENSG00000074803 | 3.341555177 | 2.882993683 | 0.212814724  | 0.888556924 | 0.927954639 | SLC12A1      |
| ENSG00000236013 | 4.207416313 | 4.770786122 | -0.192199028 | 0.888573805 | 0.927954639 | AL357146.1   |
| ENSG00000187229 | 1.200686205 | 1.487519214 | -0.294600524 | 0.88858932  | 0.927954639 | AC100800.1   |
| novel.646       | 33.62186323 | 31.77434086 | 0.077693034  | 0.888595237 | 0.927954639 | -            |
| ENSG00000261386 | 3.617173671 | 3.220619475 | 0.167959499  | 0.888664087 | 0.927954639 | AC027682.4   |
| ENSG00000202533 | 5.452194037 | 4.973788832 | 0.127336915  | 0.888701945 | 0.927954639 | RF00019      |
| ENSG00000184451 | 49.3729451  | 51.61018798 | -0.064226788 | 0.888702026 | 0.927954639 | CCR10        |
| ENSG00000248103 | 1.49643435  | 1.936102971 | -0.356355281 | 0.888767889 | 0.927986116 | AC008443.3   |

|                 |             |             |              |             |             |            |
|-----------------|-------------|-------------|--------------|-------------|-------------|------------|
| ENSG00000252361 | 3.945659226 | 4.42241945  | -0.155023488 | 0.88883664  | 0.928020605 | RNU6-118P  |
| ENSG00000129667 | 897.485352  | 923.810021  | -0.041337168 | 0.88911324  | 0.928272095 | RHBDF2     |
| ENSG00000286529 | 0.909952655 | 0.672939833 | 0.412289842  | 0.88914965  | 1           | AC090398.2 |
| ENSG00000239576 | 0.909952655 | 0.672939833 | 0.412289842  | 0.88914965  | 1           | COX6CP14   |
| ENSG00000260650 | 0.909952655 | 0.672939833 | 0.412289842  | 0.88914965  | 1           | AC010542.1 |
| ENSG00000119509 | 316.8522437 | 325.2523046 | -0.037836075 | 0.889156019 | 0.928279456 | INVS       |
| ENSG00000205500 | 1.200686205 | 1.436768536 | -0.255022558 | 0.889591765 | 1           | AC013472.1 |
| ENSG00000076984 | 855.0730587 | 835.6400305 | 0.033536517  | 0.889752084 | 0.928864423 | MAP2K7     |
| ENSG00000226279 | 0.908699006 | 1.161661783 | -0.328926046 | 0.889768535 | 1           | RPL12P10   |
| ENSG00000287033 | 0.907445357 | 0.672939833 | 0.408991322  | 0.890049861 | 1           | AL590101.1 |
| ENSG00000224083 | 0.907445357 | 0.672939833 | 0.408991322  | 0.890049861 | 1           | MTCO1P11   |
| ENSG00000272128 | 2.431602522 | 2.079026788 | 0.208977227  | 0.890063646 | 0.929152346 | AP006545.2 |
| ENSG00000081277 | 1.538018572 | 1.874739808 | -0.277755451 | 0.890119647 | 0.929173472 | PKP1       |
| ENSG00000204624 | 2.15473038  | 1.783850939 | 0.267232717  | 0.890246318 | 0.929268364 | DISP3      |
| ENSG00000260792 | 2.094270155 | 2.50754145  | -0.257023993 | 0.890295844 | 0.929282726 | LINC02280  |
| ENSG00000203812 | 4.525872677 | 4.076492923 | 0.163868029  | 0.890367345 | 0.929320022 | HIST2H2AA3 |
| ENSG00000124486 | 2934.31409  | 3002.837123 | -0.03320546  | 0.890486907 | 0.929360695 | USP9X      |
| ENSG00000172058 | 2.43410982  | 2.129777466 | 0.184291236  | 0.890505191 | 0.929360695 | SERF1A     |
| ENSG00000147488 | 16.27592097 | 15.30730282 | 0.09430119   | 0.890513626 | 0.929360695 | ST18       |
| ENSG00000243675 | 1.21705491  | 1.41669944  | -0.228989855 | 0.890528238 | 1           | AC080013.2 |
| ENSG00000183020 | 341.6722656 | 359.3240612 | -0.071960575 | 0.890565539 | 0.929377542 | AP2A2      |
| ENSG00000277840 | 1.17296339  | 1.467450118 | -0.306650919 | 0.890605057 | 1           | AC026368.1 |
| ENSG00000063169 | 415.7254807 | 402.2958116 | 0.047511961  | 0.890700589 | 0.929481142 | BICRA      |
| ENSG00000269896 | 21.67650159 | 23.30328474 | -0.098066649 | 0.89077435  | 0.92951347  | AL513477.1 |
| ENSG00000088876 | 227.1883286 | 220.8353473 | 0.041682879  | 0.890803121 | 0.92951347  | ZNF343     |
| ENSG00000250039 | 1.788421549 | 2.11916498  | -0.245648662 | 0.890869813 | 0.929545727 | AC096719.1 |
| ENSG00000234801 | 7.006581315 | 6.409401493 | 0.122945697  | 0.890907881 | 0.929548117 | MORF4      |
| ENSG00000175730 | 9.908759678 | 9.202662182 | 0.103717957  | 0.890992241 | 0.929598803 | BAK1P1     |
| ENSG00000213658 | 8.461431442 | 9.282810171 | -0.123502079 | 0.891099834 | 0.929627683 | LAT        |
| ENSG00000177025 | 12.87265191 | 13.92012909 | -0.104698797 | 0.891125989 | 0.929627683 | C19orf18   |
| ENSG00000279544 | 4.55610279  | 4.963176346 | -0.13074088  | 0.89115083  | 0.929627683 | AL133243.4 |
| ENSG00000162373 | 58.32013871 | 63.63019551 | -0.123935604 | 0.891163045 | 0.929627683 | BEND5      |
| ENSG00000183346 | 5.194197897 | 4.514592589 | 0.192575768  | 0.891263009 | 0.929672179 | CABCOCO1   |
| ENSG00000232517 | 5.892539766 | 5.146109961 | 0.203723904  | 0.891277266 | 0.929672179 | AC112198.2 |
| ENSG00000144036 | 586.1326855 | 569.3652037 | 0.042368909  | 0.891340664 | 0.929676058 | EXOC6B     |
| ENSG00000278662 | 3.97463569  | 3.454303767 | 0.2169527    | 0.891365889 | 0.929676058 | GOLGA6L10  |
| ENSG00000234709 | 1.538018572 | 1.885352294 | -0.284643986 | 0.891405277 | 0.929676058 | UPF3AP3    |
| ENSG00000254003 | 1.814890715 | 2.10970837  | -0.224617767 | 0.891424116 | 0.929676058 | AC003991.2 |
| ENSG00000091656 | 324.9005971 | 342.9058719 | -0.078231876 | 0.891511077 | 0.929723063 | ZFHX4      |
| ENSG00000153086 | 5.087138855 | 4.454385301 | 0.181419923  | 0.891540756 | 0.929723063 | ACMSD      |
| ENSG00000225032 | 107.4170384 | 113.1429227 | -0.076292701 | 0.891611211 | 0.929755373 | AL162586.1 |
| ENSG00000088986 | 4718.152496 | 4590.019419 | 0.039658543  | 0.891643312 | 0.929755373 | DYNLL1     |
| ENSG00000113763 | 0.89358395  | 1.130980201 | -0.316301591 | 0.891710315 | 1           | UNC5A      |
| ENSG00000286563 | 0.89358395  | 1.130980201 | -0.316301591 | 0.891710315 | 1           | AC078983.1 |
| ENSG00000222788 | 0.89358395  | 1.130980201 | -0.316301591 | 0.891710315 | 1           | RNU2-38P   |
| ENSG00000205809 | 10.39348166 | 9.25572461  | 0.165051128  | 0.891755224 | 0.929801495 | KLRC2      |
| ENSG00000241527 | 2.153476731 | 2.486316478 | -0.216499729 | 0.891762835 | 0.929801495 | CA15P1     |
| ENSG00000226015 | 20.76529529 | 21.84901565 | -0.072274715 | 0.891799183 | 0.929801495 | CCT8P1     |
| ENSG00000279659 | 1.814890715 | 1.426156051 | 0.345770549  | 0.891830694 | 0.929801495 | AL451064.2 |
| ENSG00000022840 | 2699.597883 | 2649.030683 | 0.027350767  | 0.891888663 | 0.929816356 | RNF10      |
| ENSG00000274884 | 1.774560141 | 1.456837632 | 0.293935694  | 0.891916524 | 0.929816356 | AL117190.3 |

|                 |             |             |              |             |             |             |
|-----------------|-------------|-------------|--------------|-------------|-------------|-------------|
| ENSG00000271387 | 4.454058343 | 3.913628404 | 0.188417223  | 0.892000944 | 0.929867051 | AL445228.2  |
| ENSG00000210107 | 0.909952655 | 0.723690511 | 0.334104531  | 0.892069438 | 1           | MT-TQ       |
| ENSG00000175707 | 0.909952655 | 0.723690511 | 0.334104531  | 0.892069438 | 1           | KDF1        |
| ENSG00000278390 | 11.29208021 | 10.42440286 | 0.122893037  | 0.892270914 | 0.930111163 | AL354696.2  |
| ENSG00000245748 | 2.760088077 | 3.189937893 | -0.215497407 | 0.892373372 | 0.930180645 | AC097382.2  |
| ENSG00000179833 | 1076.587596 | 1110.379642 | -0.044290383 | 0.892426746 | 0.93019896  | SERTAD2     |
| ENSG00000173480 | 197.8274326 | 203.9792433 | -0.043245932 | 0.89252261  | 0.930261561 | ZNF417      |
| ENSG00000073578 | 297.0850125 | 303.4417577 | -0.030178209 | 0.8926681   | 0.930362025 | SDHA        |
| ENSG00000119508 | 116.9631511 | 126.9501548 | -0.117106312 | 0.892690617 | 0.930362025 | NR4A3       |
| ENSG00000232065 | 4.898449752 | 5.474407537 | -0.1741246   | 0.892786937 | 0.930397607 | LINC01063   |
| ENSG00000272913 | 27.42856072 | 28.74829496 | -0.069108366 | 0.892832051 | 0.930397607 | AC009237.14 |
| ENSG00000271874 | 2.150969433 | 2.496928964 | -0.221641017 | 0.89283219  | 0.930397607 | AC025754.2  |
| ENSG00000173011 | 474.8496357 | 463.8958516 | 0.03351313   | 0.893024864 | 0.930561064 | TADA2B      |
| ENSG00000271984 | 0.907445357 | 0.723690511 | 0.331112438  | 0.89303962  | 1           | AL008726.1  |
| ENSG00000189241 | 1080.546313 | 1116.809258 | -0.047864038 | 0.893066358 | 0.930566979 | TSPYL1      |
| ENSG00000065057 | 400.8708305 | 409.8314886 | -0.032158243 | 0.893246065 | 0.930716904 | NTHL1       |
| ENSG00000134215 | 60.15963169 | 68.21535109 | -0.180688283 | 0.893310875 | 0.930720148 | VAV3        |
| ENSG00000222455 | 2.639167628 | 2.099095884 | 0.329435528  | 0.893320824 | 0.930720148 | RNA5SP296   |
| ENSG00000178951 | 1353.383532 | 1394.26241  | -0.042714833 | 0.893521718 | 0.930892123 | ZBTB7A      |
| ENSG00000206698 | 1.81990531  | 1.518200796 | 0.278824134  | 0.893597193 | 0.930933424 | RNU1-73P    |
| ENSG00000251194 | 11.11954634 | 11.95334453 | -0.099133291 | 0.893679615 | 0.930981959 | AL133330.1  |
| ENSG00000258819 | 19.07132502 | 17.98742219 | 0.078369828  | 0.89388108  | 0.931138211 | LINC02289   |
| ENSG00000174527 | 8.928246337 | 8.193252432 | 0.125637607  | 0.893901284 | 0.931138211 | MYO1H       |
| ENSG00000276754 | 0.925067711 | 0.693008929 | 0.400577093  | 0.893936925 | 1           | AC006111.3  |
| ENSG00000262898 | 0.925067711 | 0.693008929 | 0.400577093  | 0.893936925 | 1           | AC139099.2  |
| ENSG00000230519 | 0.925067711 | 0.693008929 | 0.400577093  | 0.893936925 | 1           | HMGB1P49    |
| ENSG00000275550 | 0.925067711 | 0.693008929 | 0.400577093  | 0.893936925 | 1           | AL096712.1  |
| ENSG00000204195 | 0.925067711 | 0.693008929 | 0.400577093  | 0.893936925 | 1           | AWAT1       |
| ENSG00000278192 | 0.925067711 | 0.693008929 | 0.400577093  | 0.893936925 | 1           | AL118505.1  |
| ENSG00000250731 | 6.905790516 | 7.470717796 | -0.113788902 | 0.893984606 | 0.93118767  | TPM3P6      |
| ENSG00000225264 | 3.064683035 | 3.525251935 | -0.209793757 | 0.894086321 | 0.931249126 | ZNRF2P2     |
| ENSG00000117868 | 2565.918079 | 2626.021639 | -0.033468179 | 0.894115294 | 0.931249126 | ESYT2       |
| ENSG00000130830 | 445.4699356 | 435.6575851 | 0.032791901  | 0.894375829 | 0.93148314  | MPP1        |
| ENSG00000235579 | 1.54052587  | 1.874739808 | -0.276410374 | 0.894525246 | 0.931588733 | AC007283.2  |
| ENSG00000049283 | 10.3381073  | 9.427018258 | 0.125093918  | 0.894574286 | 0.931588733 | EPN3        |
| ENSG00000286512 | 2.123246619 | 2.435565801 | -0.209958898 | 0.894590962 | 0.931588733 | AL031768.2  |
| ENSG00000273481 | 0.894837599 | 0.672939833 | 0.392170436  | 0.894636578 | 1           | AL391069.3  |
| ENSG00000213906 | 0.894837599 | 0.672939833 | 0.392170436  | 0.894636578 | 1           | LTB4R2      |
| ENSG00000279071 | 1.480065645 | 1.813376645 | -0.28484054  | 0.894656462 | 0.931588733 | AC073592.3  |
| ENSG00000286242 | 10.89811983 | 11.76912665 | -0.103667996 | 0.894720042 | 0.931588733 | AC018797.3  |
| ENSG00000276840 | 7.23685464  | 7.980664717 | -0.137229379 | 0.894746337 | 0.931588733 | PMS2P10     |
| ENSG00000019991 | 408.3421293 | 472.0242639 | -0.209192334 | 0.894761979 | 0.931588733 | HGF         |
| ENSG00000120693 | 234.0190257 | 218.4089938 | 0.098904023  | 0.894770164 | 0.931588733 | SMAD9       |
| ENSG00000238084 | 3.944405577 | 3.577158488 | 0.138343404  | 0.894799925 | 0.931588733 | AL031284.1  |
| ENSG00000203392 | 30.65016437 | 32.5071028  | -0.080526564 | 0.894864886 | 0.931619034 | AC105020.1  |
| ENSG00000231551 | 37.8069986  | 39.69235814 | -0.072062976 | 0.894902747 | 0.931621119 | AC245100.4  |
| ENSG00000207062 | 0.89358395  | 0.672939833 | 0.390505834  | 0.895090467 | 1           | SNORA15B-1  |
| ENSG00000243423 | 0.89358395  | 0.672939833 | 0.390505834  | 0.895090467 | 1           | AC004223.1  |
| ENSG00000254833 | 0.89358395  | 0.672939833 | 0.390505834  | 0.895090467 | 1           | AP001893.3  |
| ENSG00000215840 | 0.921306765 | 0.693008929 | 0.395636638  | 0.895264137 | 1           | AL592295.1  |
| ENSG00000178982 | 0.921306765 | 0.693008929 | 0.395636638  | 0.895264137 | 1           | EIF3K       |

|                  |             |             |              |             |             |              |
|------------------|-------------|-------------|--------------|-------------|-------------|--------------|
| ENSG00000012822  | 1931.424822 | 1881.755229 | 0.03775727   | 0.895270518 | 0.931966638 | CALCOCO1     |
| ENSG000000280344 | 1.54052587  | 1.885352294 | -0.283298433 | 0.895408301 | 0.932059757 | AC009166.2   |
| ENSG000000230433 | 1.493927053 | 1.813376645 | -0.273478358 | 0.895431721 | 0.932059757 | AL031770.1   |
| ENSG000000234842 | 0.923814062 | 0.743759607 | 0.323035271  | 0.895468957 | 1           | MTCO2P16     |
| ENSG000000212907 | 14941.58674 | 14462.88345 | 0.046977879  | 0.89547712  | 0.932069671 | MT-ND4L      |
| ENSG000000198162 | 1054.729698 | 1034.894465 | 0.027168926  | 0.895541228 | 0.93208815  | MAN1A2       |
| ENSG000000213889 | 21.54075082 | 23.06001544 | -0.091853244 | 0.895566625 | 0.93208815  | PPM1N        |
| ENSG000000273010 | 0.908699006 | 1.10029862  | -0.266345545 | 0.895714293 | 1           | AL360270.3   |
| ENSG000000147162 | 2823.859545 | 2758.658657 | 0.033782109  | 0.895765515 | 0.932257805 | OGT          |
| ENSG000000145780 | 525.2153904 | 536.5592947 | -0.030534985 | 0.895811297 | 0.932268108 | FEM1C        |
| ENSG000000241112 | 2.109385211 | 1.834601616 | 0.212906542  | 0.895899419 | 0.932322471 | RPL29P14     |
| ENSG000000185015 | 74.76071599 | 78.37663798 | -0.069041419 | 0.895944225 | 0.932331754 | CA13         |
| ENSG000000176396 | 325.4452651 | 332.0975752 | -0.029675297 | 0.896079254 | 0.93238164  | EID2         |
| ENSG000000227359 | 4.50065716  | 4.923038154 | -0.134260247 | 0.896116932 | 0.93238164  | AC017074.1   |
| ENSG000000106330 | 336.1454218 | 344.021266  | -0.032626493 | 0.896117122 | 0.93238164  | MOSPD3       |
| ENSG000000261379 | 2.052685933 | 2.466247382 | -0.261983716 | 0.896140088 | 0.93238164  | AC010735.1   |
| ENSG000000286579 | 1.49643435  | 1.813376645 | -0.271550312 | 0.896171599 | 0.93238164  | AC023483.1   |
| ENSG000000287507 | 1.495180701 | 1.742556871 | -0.228361849 | 0.896222012 | 0.932396752 | AP001053.1   |
| ENSG000000258399 | 1.521649867 | 1.844058227 | -0.271523672 | 0.89628929  | 0.932429408 | AL117190.1   |
| ENSG000000151881 | 283.3808465 | 273.802635  | 0.048501425  | 0.896340464 | 0.932445309 | TMEM267      |
| ENSG000000275601 | 4.85819045  | 5.555839796 | -0.199410968 | 0.896442339 | 0.93251395  | AC011330.2   |
| novel.1084       | 1.203193503 | 1.41669944  | -0.238701436 | 0.896594395 | 1           | -            |
| ENSG000000260186 | 0.89358395  | 1.080229524 | -0.264118086 | 0.896619324 | 1           | LINC02137    |
| ENSG000000285091 | 1.218308559 | 1.4981317   | -0.287109651 | 0.896637474 | 0.932679594 | AL109840.2   |
| ENSG000000272551 | 2.158491326 | 2.598430319 | -0.264489594 | 0.896707748 | 0.93271535  | AC017048.3   |
| ENSG000000279837 | 4.485542104 | 4.923038154 | -0.137597597 | 0.896953841 | 0.932933974 | AC112694.2   |
| ENSG000000140691 | 266.7493297 | 275.5992818 | -0.048056951 | 0.897119189 | 0.933068601 | ARMC5        |
| ENSG000000275869 | 3.225649323 | 2.618499415 | 0.309791644  | 0.897160845 | 0.933074573 | AC136612.1   |
| ENSG000000226017 | 1.186824798 | 1.456837632 | -0.285434566 | 0.897205796 | 1           | PRICKLE2-AS3 |
| ENSG000000253313 | 0.907445357 | 1.130980201 | -0.299826006 | 0.897308613 | 1           | C1orf210     |
| ENSG000000184990 | 1219.323844 | 1248.093593 | -0.033608125 | 0.897593155 | 0.933486821 | SIVA1        |
| ENSG000000186260 | 339.7561847 | 350.0081758 | -0.042315275 | 0.897760859 | 0.933524723 | MRTFB        |
| ENSG000000171606 | 558.642169  | 574.9546448 | -0.041179395 | 0.897765565 | 0.933524723 | ZNF274       |
| ENSG000000235529 | 4.262861942 | 4.666844622 | -0.133072068 | 0.897784741 | 0.933524723 | AGAP1-IT1    |
| ENSG000000269038 | 6.62265013  | 7.123635394 | -0.106261356 | 0.89780058  | 0.933524723 | AP001462.1   |
| ENSG000000273320 | 2.450478525 | 2.069570178 | 0.228463966  | 0.897809255 | 0.933524723 | AC007032.1   |
| ENSG000000159842 | 51.48107666 | 46.78300053 | 0.140579817  | 0.898015452 | 0.933701756 | ABR          |
| ENSG000000140264 | 5411.449982 | 5291.329346 | 0.032427768  | 0.898118039 | 0.93377105  | SERF2        |
| ENSG000000188725 | 797.2866608 | 812.3245235 | -0.027230338 | 0.898336801 | 0.933943462 | SMIM15       |
| ENSG000000250474 | 9.672218109 | 10.24275351 | -0.088919015 | 0.898355762 | 0.933943462 | WBP1LP2      |
| ENSG000000251411 | 5.727812531 | 6.369134907 | -0.139716823 | 0.898578    | 0.934137125 | AC093827.3   |
| ENSG000000199226 | 0.89358395  | 1.110911105 | -0.296222612 | 0.898590469 | 1           | RNU6-50P     |
| ENSG000000267786 | 1.466204238 | 1.773238453 | -0.268841715 | 0.898650318 | 0.934174926 | AF038458.3   |
| ENSG000000198046 | 230.5294565 | 221.5815814 | 0.058327001  | 0.898809359 | 0.93430287  | ZNF667       |
| ENSG000000202461 | 3.001715513 | 3.505182839 | -0.227008893 | 0.898924681 | 0.934385363 | RF00019      |
| ENSG000000165181 | 13.32087554 | 14.09257861 | -0.078715586 | 0.898988439 | 0.934414251 | SHOC1        |
| ENSG000000159140 | 4116.547526 | 4196.800818 | -0.027847582 | 0.899360588 | 0.93476367  | SON          |
| ENSG000000185043 | 1208.177255 | 1183.183458 | 0.030116816  | 0.899438804 | 0.934792729 | CIB1         |
| ENSG000000268041 | 11.1510301  | 11.90143798 | -0.091054536 | 0.899460507 | 0.934792729 | AC010616.1   |
| ENSG000000151575 | 41.32922244 | 42.91644524 | -0.054410196 | 0.899533352 | 0.93483104  | TEX9         |
| ENSG000000132801 | 97.50411833 | 94.85706698 | 0.040225817  | 0.899589115 | 0.934851597 | ZSWIM3       |

|                 |             |             |              |             |             |            |
|-----------------|-------------|-------------|--------------|-------------|-------------|------------|
| ENSG00000200095 | 0.89358395  | 1.161661783 | -0.356530904 | 0.899668135 | 1           | RNU6-181P  |
| ENSG00000139436 | 402.2849937 | 394.6207124 | 0.027969677  | 0.899923582 | 0.935160923 | GIT2       |
| ENSG00000225192 | 1.817398012 | 1.548882377 | 0.255569808  | 0.899977941 | 0.935160923 | ZNF33BP1   |
| ENSG00000122512 | 305.4317201 | 312.9681752 | -0.035059771 | 0.899994755 | 0.935160923 | PMS2       |
| ENSG00000154358 | 192.1328835 | 200.0728885 | -0.057610416 | 0.900105607 | 0.93520242  | OBSCN      |
| ENSG00000151812 | 1.466204238 | 1.844058227 | -0.320016497 | 0.900124157 | 0.93520242  | SLC35F4    |
| ENSG00000223779 | 0.894837599 | 1.161661783 | -0.354879804 | 0.900126588 | 1           | AC239800.1 |
| ENSG00000187535 | 576.6100793 | 561.7359881 | 0.038271404  | 0.900142678 | 0.93520242  | IFT140     |
| ENSG00000028203 | 870.3967857 | 891.0997306 | -0.034311303 | 0.900194081 | 0.935218427 | VEZT       |
| novel.863       | 11.71501704 | 10.20004678 | 0.202831182  | 0.900380201 | 0.935361321 | -          |
| ENSG00000279689 | 9.32478528  | 8.76340664  | 0.098338807  | 0.900403627 | 0.935361321 | AC022400.9 |
| ENSG00000259665 | 1.17296339  | 1.4981317   | -0.337533981 | 0.900418213 | 1           | AC021231.3 |
| ENSG00000214595 | 19.21244639 | 18.1904249  | 0.074807289  | 0.900538644 | 0.935441643 | EML6       |
| ENSG00000129824 | 1887.792222 | 2535.1404   | -0.425427663 | 0.900552957 | 0.935441643 | RPS4Y1     |
| novel.391       | 65.93089535 | 64.11374602 | 0.040011934  | 0.900830617 | 0.935675202 | -          |
| ENSG00000255910 | 0.909952655 | 0.743759607 | 0.30634757   | 0.900884614 | 1           | AC024901.1 |
| ENSG00000265010 | 2.095523804 | 1.834601616 | 0.205296386  | 0.90088534  | 0.935675202 | AC087301.1 |
| ENSG00000207146 | 3.663772488 | 4.085949533 | -0.147444465 | 0.900889923 | 0.935675202 | RF00019    |
| ENSG00000282840 | 2.157237677 | 2.506385574 | -0.2221073   | 0.90092186  | 0.935675202 | AC004554.2 |
| ENSG00000285719 | 0.923814062 | 0.713078025 | 0.366546988  | 0.901003549 | 1           | AL356275.2 |
| ENSG00000238311 | 0.923814062 | 0.713078025 | 0.366546988  | 0.901003549 | 1           | SNORD13E   |
| ENSG00000261600 | 3.378124804 | 2.853467977 | 0.240186819  | 0.901125019 | 0.935848787 | AC233266.2 |
| ENSG00000170340 | 263.6821668 | 272.219685  | -0.046580631 | 0.901263482 | 0.935955173 | B3GNT2     |
| ENSG00000196739 | 1232.275337 | 1178.875387 | 0.064117136  | 0.901414449 | 0.936074536 | COL27A1    |
| ENSG00000212206 | 0.922560414 | 0.713078025 | 0.36491145   | 0.90145089  | 1           | RF00265    |
| ENSG00000258525 | 0.922560414 | 0.713078025 | 0.36491145   | 0.90145089  | 1           | AL049830.3 |
| ENSG00000237178 | 0.922560414 | 0.713078025 | 0.36491145   | 0.90145089  | 1           | AC019080.2 |
| ENSG00000146426 | 126.6246127 | 123.0555336 | 0.041254978  | 0.901505042 | 0.936131194 | TIAM2      |
| ENSG00000245534 | 3.298717306 | 3.678659843 | -0.142445735 | 0.901757779 | 0.936322197 | RORA-AS1   |
| ENSG00000179387 | 588.883697  | 578.6004053 | 0.025004871  | 0.901761057 | 0.936322197 | ELMOD2     |
| ENSG00000122254 | 0.907445357 | 0.743759607 | 0.303355077  | 0.901856221 | 1           | HS3ST2     |
| ENSG00000131951 | 0.907445357 | 0.743759607 | 0.303355077  | 0.901856221 | 1           | LRRC9      |
| ENSG00000264116 | 0.907445357 | 0.743759607 | 0.303355077  | 0.901856221 | 1           | AC116003.1 |
| ENSG00000243911 | 0.907445357 | 0.743759607 | 0.303355077  | 0.901856221 | 1           | RN7SL430P  |
| ENSG00000229853 | 0.89358395  | 1.10029862  | -0.286637624 | 0.901885675 | 1           | AL034418.1 |
| ENSG00000279730 | 0.89358395  | 1.10029862  | -0.286637624 | 0.901885675 | 1           | KMT5AP1    |
| ENSG00000285994 | 1.832513069 | 2.079026788 | -0.199543859 | 0.902131021 | 0.936668907 | AL731559.1 |
| ENSG00000177337 | 91.60949854 | 87.63475556 | 0.06221516   | 0.902261983 | 0.936740582 | DLGAP1-AS1 |
| ENSG00000174886 | 415.1622611 | 405.1160769 | 0.035680973  | 0.902272162 | 0.936740582 | NDUFA11    |
| ENSG00000263606 | 7.22550053  | 6.716345703 | 0.10053958   | 0.902369655 | 0.936783768 | AP000919.1 |
| ENSG00000286742 | 3.589450856 | 4.02458637  | -0.155060238 | 0.902385873 | 0.936783768 | AC000065.1 |
| ENSG00000236194 | 3.299970955 | 2.985650913 | 0.162944479  | 0.902494211 | 0.936858802 | AC099811.1 |
| ENSG00000260318 | 1.759445085 | 1.406086955 | 0.323373723  | 0.902532169 | 0.936860773 | COX6CP1    |
| ENSG00000286445 | 2.758834428 | 3.168712922 | -0.207670243 | 0.902577212 | 0.936870098 | AL355334.2 |
| ENSG00000261476 | 3.578096747 | 3.240688571 | 0.149631073  | 0.902686873 | 0.936921605 | AC009163.3 |
| ENSG00000133111 | 145.2854227 | 139.655187  | 0.055232522  | 0.902698958 | 0.936921605 | RFXAP      |
| ENSG00000198951 | 1081.436765 | 1060.464381 | 0.02811235   | 0.902944097 | 0.937128619 | NAGA       |
| ENSG00000248664 | 2.431602522 | 2.731897526 | -0.186172753 | 0.902972708 | 0.937128619 | AC010273.1 |
| novel.960       | 14.09138775 | 12.8624088  | 0.12975509   | 0.903006619 | 0.937128619 | -          |
| ENSG00000130560 | 796.82895   | 810.351108  | -0.024372238 | 0.903253415 | 0.937347299 | UBAC1      |
| novel.435       | 57.75657905 | 61.89804152 | -0.097421751 | 0.903352581 | 0.937349978 | -          |

|                 |             |             |              |             |             |            |
|-----------------|-------------|-------------|--------------|-------------|-------------|------------|
| ENSG00000287278 | 1.535511275 | 1.161661783 | 0.413052484  | 0.903364231 | 0.937349978 | AL353600.2 |
| ENSG00000236058 | 1.535511275 | 1.161661783 | 0.413052484  | 0.903364231 | 0.937349978 | RPL17P36   |
| ENSG00000273107 | 0.922560414 | 1.130980201 | -0.281968212 | 0.903384834 | 1           | AL512598.1 |
| ENSG00000283427 | 0.922560414 | 1.130980201 | -0.281968212 | 0.903384834 | 1           | AC006453.4 |
| ENSG00000148399 | 564.1836422 | 552.3252118 | 0.03049623   | 0.903471072 | 0.9374234   | DPH7       |
| ENSG00000250027 | 2.082916045 | 2.435565801 | -0.229496363 | 0.90355595  | 0.937474029 | AC022272.1 |
| ENSG00000248318 | 1.50778846  | 1.783850939 | -0.242796071 | 0.903609919 | 0.937492585 | AC104958.1 |
| ENSG00000260088 | 5.701343365 | 6.286546772 | -0.129772311 | 0.903730272 | 0.937574033 | AL445483.1 |
| ENSG00000235236 | 0.879722543 | 1.130980201 | -0.342583907 | 0.90375326  | 1           | AC137630.2 |
| ENSG00000238199 | 0.879722543 | 1.130980201 | -0.342583907 | 0.90375326  | 1           | UBE2V2P3   |
| ENSG00000068079 | 1077.096691 | 1058.55268  | 0.024944364  | 0.903760598 | 0.937574033 | IFI35      |
| ENSG00000108352 | 167.8226008 | 173.8668449 | -0.04977863  | 0.903877652 | 0.937647006 | RAPGEFL1   |
| novel.659       | 0.923814062 | 1.130980201 | -0.280508308 | 0.903881825 | 1           | -          |
| ENSG00000067842 | 0.923814062 | 1.130980201 | -0.280508308 | 0.903881825 | 1           | ATP2B3     |
| ENSG00000240751 | 2.095523804 | 1.844058227 | 0.199117711  | 0.903903118 | 0.937647006 | AC026348.1 |
| ENSG00000113119 | 257.0033319 | 262.9397817 | -0.032482027 | 0.904037378 | 0.937734107 | TMCO6      |
| ENSG00000226648 | 24.27820195 | 25.35522596 | -0.060129273 | 0.90405927  | 0.937734107 | PLCG1-AS1  |
| ENSG00000263219 | 1.774560141 | 2.11916498  | -0.254885059 | 0.904210556 | 0.937853585 | RYKP1      |
| ENSG00000249669 | 182.9737936 | 190.7905103 | -0.060929208 | 0.904376294 | 0.937988044 | CARMN      |
| ENSG00000240549 | 1.789675198 | 2.11916498  | -0.244661273 | 0.904517907 | 0.93809747  | THOC7-AS1  |
| ENSG00000112031 | 257.5230142 | 250.9726138 | 0.037320439  | 0.90459965  | 0.9381448   | MTRF1L     |
| ENSG00000280758 | 6.036168435 | 6.544024575 | -0.127676909 | 0.904744058 | 0.93825711  | AL356481.3 |
| ENSG00000240791 | 0.907445357 | 1.161661783 | -0.338184038 | 0.904767612 | 1           | MTND4LP7   |
| ENSG00000269737 | 32.42862765 | 30.50604064 | 0.090887102  | 0.904815375 | 0.938293616 | AL691432.1 |
| ENSG00000251221 | 1.17296339  | 1.41669944  | -0.266511018 | 0.904872232 | 1           | LINC01337  |
| ENSG00000276096 | 1.17296339  | 1.41669944  | -0.266511018 | 0.904872232 | 1           | RF00017    |
| ENSG00000275339 | 0.879722543 | 1.080229524 | -0.283505143 | 0.905144634 | 1           | Z99129.1   |
| ENSG00000266373 | 0.909952655 | 1.110911105 | -0.276809126 | 0.905191548 | 1           | AP002472.1 |
| ENSG00000151694 | 677.5186928 | 662.3002603 | 0.032773771  | 0.905314278 | 0.938773508 | ADAM17     |
| ENSG00000260176 | 9.782753362 | 8.775303396 | 0.155889384  | 0.905415555 | 0.938841057 | AC141586.2 |
| ENSG00000152700 | 1037.20474  | 1053.639179 | -0.022912541 | 0.905461303 | 0.938851024 | SAR1B      |
| ENSG00000231043 | 5.200537412 | 4.778958462 | 0.127826889  | 0.905590059 | 0.938947055 | AC007238.1 |
| ENSG00000279006 | 0.909952655 | 1.161661783 | -0.334909721 | 0.905678396 | 1           | AL022323.2 |
| ENSG00000287185 | 6.012206566 | 5.542787165 | 0.128438328  | 0.905685211 | 0.939008239 | AC041005.1 |
| ENSG00000143457 | 360.3884068 | 368.4704286 | -0.032101572 | 0.905744791 | 0.939032539 | GOLPH3L    |
| ENSG00000286632 | 0.909952655 | 0.713078025 | 0.348239563  | 0.906007412 | 1           | AC008751.3 |
| ENSG00000256084 | 0.909952655 | 0.713078025 | 0.348239563  | 0.906007412 | 1           | AC092112.1 |
| ENSG00000274570 | 0.909952655 | 0.713078025 | 0.348239563  | 0.906007412 | 1           | SPDYE10P   |
| ENSG00000236969 | 1.84261353  | 2.180528143 | -0.243376604 | 0.906050432 | 0.939299424 | GGT8P      |
| ENSG00000227906 | 3.676380247 | 4.116631115 | -0.15365865  | 0.906074523 | 0.939299424 | SNAP25-AS1 |
| ENSG00000253190 | 0.925067711 | 0.723690511 | 0.353098457  | 0.906235209 | 1           | AC084082.1 |
| ENSG00000248968 | 0.925067711 | 0.723690511 | 0.353098457  | 0.906235209 | 1           | AC012640.1 |
| ENSG00000234263 | 3.665026137 | 4.055267952 | -0.13905057  | 0.906328576 | 0.939525306 | AL024508.1 |
| ENSG00000069424 | 578.9694228 | 550.132188  | 0.074015575  | 0.906549276 | 0.939711451 | KCNAB2     |
| ENSG00000172273 | 337.1513644 | 329.4786438 | 0.034115781  | 0.906580483 | 0.939711451 | HINFP      |
| ENSG00000274070 | 23.76192493 | 22.83707203 | 0.062347466  | 0.906675379 | 0.939772322 | CASTOR2    |
| ENSG00000257613 | 0.894837599 | 0.743759607 | 0.288059619  | 0.906818536 | 1           | LINC01481  |
| ENSG00000225193 | 0.894837599 | 0.743759607 | 0.288059619  | 0.906818536 | 1           | RPS12P26   |
| ENSG00000248711 | 0.894837599 | 0.743759607 | 0.288059619  | 0.906818536 | 1           | THUMPDP3P1 |
| ENSG00000211768 | 0.925067711 | 0.672939833 | 0.442367104  | 0.906833219 | 1           | TRBJ2-4    |
| ENSG00000079393 | 0.925067711 | 0.672939833 | 0.442367104  | 0.906833219 | 1           | DUSP13     |

|                 |             |             |              |             |             |             |
|-----------------|-------------|-------------|--------------|-------------|-------------|-------------|
| ENSG00000226348 | 0.925067711 | 0.672939833 | 0.442367104  | 0.906833219 | 1           | VN2R10P     |
| ENSG00000286812 | 0.925067711 | 0.672939833 | 0.442367104  | 0.906833219 | 1           | AP001120.5  |
| ENSG00000224184 | 4.22127772  | 4.73064793  | -0.175835173 | 0.906844362 | 0.939909976 | MIR3681HG   |
| novel.245       | 0.907445357 | 0.713078025 | 0.344938236  | 0.906909566 | 1           | -           |
| ENSG00000280295 | 0.907445357 | 0.713078025 | 0.344938236  | 0.906909566 | 1           | AC099811.6  |
| ENSG00000281106 | 0.907445357 | 0.713078025 | 0.344938236  | 0.906909566 | 1           | TMEM272     |
| ENSG00000284994 | 0.907445357 | 0.713078025 | 0.344938236  | 0.906909566 | 1           | AL590282.2  |
| ENSG00000287965 | 1.480065645 | 1.762625967 | -0.251416148 | 0.906918284 | 0.939949096 | AC018557.3  |
| ENSG00000273319 | 4.18854031  | 4.657388011 | -0.150435478 | 0.906989967 | 0.939985892 | AC058791.1  |
| ENSG00000133226 | 1927.038397 | 1975.944951 | -0.036049174 | 0.907196145 | 0.940140744 | SRRM1       |
| ENSG00000125817 | 3161.448908 | 3111.380982 | 0.022959666  | 0.907211755 | 0.940140744 | CENPB       |
| ENSG0000023516  | 1348.130267 | 1323.03535  | 0.027285635  | 0.907258101 | 0.940151273 | AKAP11      |
| ENSG00000267226 | 0.89358395  | 0.743759607 | 0.286554532  | 0.907307298 | 1           | AC104971.1  |
| ENSG00000249493 | 0.89358395  | 0.743759607 | 0.286554532  | 0.907307298 | 1           | ANKRD20A18P |
| ENSG00000186912 | 0.907445357 | 1.10029862  | -0.27015479  | 0.907490663 | 1           | P2RY4       |
| ENSG00000162592 | 0.921306765 | 0.723690511 | 0.348155092  | 0.907564537 | 1           | CCDC27      |
| ENSG00000274310 | 0.921306765 | 0.723690511 | 0.348155092  | 0.907564537 | 1           | AC091076.1  |
| ENSG00000223838 | 0.921306765 | 0.723690511 | 0.348155092  | 0.907564537 | 1           | AC007091.1  |
| ENSG00000145022 | 821.5038324 | 807.1233436 | 0.025342108  | 0.907797537 | 0.940672748 | TCTA        |
| ENSG00000268533 | 1.218308559 | 1.456837632 | -0.255769315 | 0.907877562 | 1           | AC003002.2  |
| ENSG00000272382 | 6.05253714  | 6.470764656 | -0.095577986 | 0.907899229 | 0.940728574 | AC025171.5  |
| ENSG00000136504 | 766.4434213 | 778.469358  | -0.022365378 | 0.907944281 | 0.940728574 | KAT7        |
| ENSG00000232818 | 15.61386399 | 16.45963639 | -0.074629377 | 0.907976812 | 0.940728574 | RPS2P32     |
| ENSG00000225521 | 0.921306765 | 0.672939833 | 0.43708093   | 0.907980859 | 1           | AC005237.1  |
| ENSG00000254275 | 0.921306765 | 0.672939833 | 0.43708093   | 0.907980859 | 1           | LINC00824   |
| ENSG00000236132 | 0.921306765 | 0.672939833 | 0.43708093   | 0.907980859 | 1           | AL022331.1  |
| ENSG00000272097 | 5.789526405 | 6.479065392 | -0.163241077 | 0.907996245 | 0.940728574 | AL024498.1  |
| ENSG00000177685 | 68.83615048 | 71.54748929 | -0.054104262 | 0.908040772 | 0.940737192 | CRACR2B     |
| ENSG00000089123 | 136.0671983 | 139.4303173 | -0.036711861 | 0.908110251 | 0.940771658 | TASP1       |
| ENSG00000112379 | 65.23487549 | 61.07948061 | 0.095152108  | 0.908196127 | 0.940823109 | ARFGEF3     |
| ENSG00000141052 | 24.49712116 | 23.20062751 | 0.083075797  | 0.908245192 | 0.940836423 | MYOCD       |
| ENSG00000228175 | 9.431844322 | 8.684414526 | 0.10917338   | 0.908395459 | 0.940954566 | GEMIN8P4    |
| ENSG00000173080 | 1.774560141 | 2.079026788 | -0.231887981 | 0.908440552 | 0.940963759 | RXFP4       |
| ENSG00000180611 | 139.3655596 | 142.6787458 | -0.032449423 | 0.908559429 | 0.941035808 | MB21D2      |
| ENSG00000125482 | 355.8783768 | 362.5208993 | -0.026571035 | 0.90858255  | 0.941035808 | TTF1        |
| ENSG00000179627 | 125.3599188 | 129.1006905 | -0.04039391  | 0.908715623 | 0.941136116 | ZBTB42      |
| ENSG00000186787 | 89.14354895 | 91.57765288 | -0.040279963 | 0.909038278 | 0.941400028 | SPIN2B      |
| novel.303       | 12.34544807 | 11.57673643 | 0.096010879  | 0.909042912 | 0.941400028 | -           |
| ENSG00000213609 | 0.923814062 | 1.080229524 | -0.232091092 | 0.90908787  | 1           | RPL7AP50    |
| ENSG00000231365 | 208.1927641 | 202.9844744 | 0.036505745  | 0.909601082 | 0.94194052  | WARS2-AS1   |
| ENSG00000214226 | 54.38278466 | 56.70567566 | -0.0621232   | 0.909721826 | 0.94202801  | C17orf67    |
| ENSG00000171786 | 5.111100724 | 4.647931401 | 0.137874438  | 0.909814245 | 0.942086163 | NHLH1       |
| ENSG00000182405 | 78.50779912 | 76.01903681 | 0.044075762  | 0.909870097 | 0.942106448 | PGBD4       |
| ENSG00000228431 | 0.879722543 | 1.110911105 | -0.320567183 | 0.909997104 | 1           | ARL5AP3     |
| ENSG00000229758 | 0.879722543 | 1.110911105 | -0.320567183 | 0.909997104 | 1           | DYNLT3P2    |
| ENSG00000222344 | 0.879722543 | 0.693008929 | 0.339743721  | 0.910251502 | 1           | RNU6-613P   |
| ENSG00000211575 | 0.879722543 | 0.693008929 | 0.339743721  | 0.910251502 | 1           | MIR760      |
| ENSG00000206926 | 0.879722543 | 0.693008929 | 0.339743721  | 0.910251502 | 1           | RNU6-1024P  |
| ENSG00000268873 | 0.879722543 | 0.693008929 | 0.339743721  | 0.910251502 | 1           | AC022601.1  |
| novel.581       | 0.879722543 | 0.693008929 | 0.339743721  | 0.910251502 | 1           | -           |
| ENSG00000214655 | 1392.656992 | 1423.591707 | -0.031509554 | 0.910368753 | 0.942561749 | ZSWIM8      |



|                 |             |             |              |             |             |            |
|-----------------|-------------|-------------|--------------|-------------|-------------|------------|
| ENSG00000088833 | 1386.068484 | 1361.868115 | 0.025254048  | 0.910382377 | 0.942561749 | NSFL1C     |
| ENSG00000287549 | 1.21705491  | 1.396630344 | -0.212176722 | 0.910389737 | 1           | AC092268.2 |
| ENSG00000117595 | 13.45691105 | 14.29930573 | -0.095544317 | 0.910547834 | 0.942695488 | IRF6       |
| ENSG00000119630 | 389.4189917 | 413.6711589 | -0.087562812 | 0.910664077 | 0.942778267 | PGF        |
| ENSG00000213188 | 1.230916317 | 1.447381022 | -0.235891173 | 0.910723141 | 1           | YBX1P4     |
| ENSG00000235112 | 2.06654734  | 1.682349583 | 0.287792964  | 0.910882518 | 0.942966837 | HSPE1P27   |
| ENSG00000217929 | 4.135601978 | 4.788415073 | -0.204928387 | 0.911005346 | 0.943056415 | CICP18     |
| ENSG00000273155 | 0.600343103 | 0.743759607 | -0.290053589 | 0.911153811 | 1           | AC092587.1 |
| ENSG00000244061 | 0.600343103 | 0.743759607 | -0.290053589 | 0.911153811 | 1           | AC093278.1 |
| ENSG00000166479 | 1641.184546 | 1605.063322 | 0.031989332  | 0.911243933 | 0.943265812 | TMX3       |
| ENSG00000055211 | 1213.709569 | 1231.489735 | -0.021153364 | 0.9113244   | 0.943286263 | GINM1      |
| ENSG00000225528 | 2.157237677 | 1.844058227 | 0.229790149  | 0.911336303 | 0.943286263 | Z82206.1   |
| ENSG00000284770 | 3.636049674 | 3.944309986 | -0.117974477 | 0.911404377 | 0.943319143 | TBCE       |
| ENSG00000249532 | 0.894837599 | 0.713078025 | 0.328104006  | 0.911506075 | 1           | MIR302CHG  |
| ENSG00000168070 | 0.894837599 | 0.713078025 | 0.328104006  | 0.911506075 | 1           | MAJIN      |
| ENSG00000226161 | 0.894837599 | 0.713078025 | 0.328104006  | 0.911506075 | 1           | EIF4A1P5   |
| ENSG00000265204 | 0.894837599 | 0.713078025 | 0.328104006  | 0.911506075 | 1           | AC090772.2 |
| ENSG00000260167 | 3.001715513 | 3.424906455 | -0.198098999 | 0.911523708 | 0.943358014 | AC093249.2 |
| ENSG00000161860 | 19.43609547 | 20.48306688 | -0.072717267 | 0.911546705 | 0.943358014 | SYCE2      |
| ENSG00000139233 | 392.0700294 | 400.1691634 | -0.030124864 | 0.911550862 | 0.943358014 | LLPH       |
| ENSG00000264932 | 1.201939854 | 1.426156051 | -0.247290859 | 0.911732484 | 1           | AC115989.1 |
| ENSG00000050405 | 2159.115409 | 2231.974205 | -0.048006719 | 0.911749265 | 0.943490219 | LIMA1      |
| ENSG00000261773 | 0.601596751 | 0.743759607 | -0.288001659 | 0.911772023 | 1           | AC244090.3 |
| ENSG00000228988 | 0.601596751 | 0.743759607 | -0.288001659 | 0.911772023 | 1           | AL353771.1 |
| ENSG00000287374 | 0.601596751 | 0.743759607 | -0.288001659 | 0.911772023 | 1           | AC239860.4 |
| ENSG00000237361 | 0.601596751 | 0.743759607 | -0.288001659 | 0.911772023 | 1           | TUSC8      |
| ENSG00000204397 | 266.0145458 | 257.0081045 | 0.049688305  | 0.911772186 | 0.943490219 | CARD16     |
| ENSG00000165752 | 329.6312269 | 321.0923592 | 0.038809851  | 0.911787553 | 0.943490219 | STK32C     |
| ENSG00000167183 | 2.391271949 | 2.10970837  | 0.176612118  | 0.911845645 | 0.943512752 | PRR15L     |
| ENSG00000089250 | 0.89358395  | 0.713078025 | 0.326438069  | 0.911960887 | 1           | NOS1       |
| ENSG00000279067 | 0.89358395  | 0.713078025 | 0.326438069  | 0.911960887 | 1           | AC002540.1 |
| ENSG00000277249 | 1.84261353  | 2.231278821 | -0.272852477 | 0.91217699  | 0.943818016 | MIR6784    |
| ENSG00000113520 | 0.600343103 | 0.774441189 | -0.342392199 | 0.912247982 | 1           | IL4        |
| ENSG00000266909 | 0.600343103 | 0.774441189 | -0.342392199 | 0.912247982 | 1           | SLC25A6P4  |
| ENSG00000212175 | 3.5743358   | 3.210006989 | 0.157108558  | 0.912270005 | 0.943876668 | RF00586    |
| ENSG00000243008 | 1.81990531  | 2.11916498  | -0.22453484  | 0.912411421 | 0.943985391 | AL359538.1 |
| novel.837       | 3.575589449 | 3.168712922 | 0.171905477  | 0.912578172 | 0.944120315 | -          |
| ENSG00000198312 | 2.150969433 | 1.844058227 | 0.226189016  | 0.91270947  | 0.944218553 | BMS1P9     |
| ENSG00000281468 | 20.9315609  | 20.18789103 | 0.053407034  | 0.912748781 | 0.944221624 | AC006504.7 |
| ENSG00000278035 | 0.601596751 | 0.774441189 | -0.340053218 | 0.912835464 | 1           | AL121895.2 |
| ENSG00000239572 | 0.601596751 | 0.774441189 | -0.340053218 | 0.912835464 | 1           | AC108749.1 |
| ENSG00000168484 | 0.601596751 | 0.774441189 | -0.340053218 | 0.912835464 | 1           | SFTPC      |
| ENSG00000256314 | 0.601596751 | 0.774441189 | -0.340053218 | 0.912835464 | 1           | AC078962.3 |
| ENSG00000243297 | 0.601596751 | 0.774441189 | -0.340053218 | 0.912835464 | 1           | RPL31P61   |
| ENSG00000206763 | 0.601596751 | 0.774441189 | -0.340053218 | 0.912835464 | 1           | RNU6-10P   |
| ENSG00000278131 | 0.879722543 | 1.10029862  | -0.309637339 | 0.913101828 | 1           | AC116050.1 |
| ENSG00000266531 | 0.879722543 | 1.10029862  | -0.309637339 | 0.913101828 | 1           | MIR4706    |
| ENSG00000278576 | 8.739557234 | 8.244003109 | 0.085130075  | 0.913301472 | 0.944755755 | AL162171.4 |
| ENSG00000215908 | 618.2398388 | 637.8548225 | -0.0448242   | 0.913387789 | 0.944807427 | CROCCP2    |
| ENSG00000205413 | 576.7666401 | 558.9834045 | 0.044718675  | 0.913645486 | 0.945036363 | SAMD9      |
| novel.284       | 1.788421549 | 1.548882377 | 0.233303485  | 0.913792154 | 0.945150442 | -          |

|                 |             |             |              |             |             |            |
|-----------------|-------------|-------------|--------------|-------------|-------------|------------|
| ENSG00000166478 | 287.8053158 | 281.7814891 | 0.030997624  | 0.913843407 | 0.945165827 | ZNF143     |
| ENSG00000147416 | 1906.715405 | 1935.674908 | -0.021739226 | 0.914041832 | 0.94533342  | ATP6V1B2   |
| ENSG00000236166 | 0.923814062 | 1.10029862  | -0.250828946 | 0.914071108 | 1           | AL021408.1 |
| ENSG00000170222 | 133.3119822 | 136.3483836 | -0.031627334 | 0.914101224 | 0.945357212 | ADPRM      |
| ENSG00000254251 | 0.908699006 | 0.774441189 | 0.264595591  | 0.914204405 | 1           | AC103770.1 |
| ENSG00000205562 | 23.02994801 | 21.45362271 | 0.098515016  | 0.914323589 | 0.945526073 | AL049775.1 |
| ENSG00000117000 | 491.4633329 | 504.499269  | -0.037220614 | 0.914412677 | 0.945526073 | RLF        |
| ENSG00000280053 | 0.879722543 | 1.161661783 | -0.38488781  | 0.914440351 | 1           | AC011199.1 |
| ENSG00000257070 | 0.879722543 | 1.161661783 | -0.38488781  | 0.914440351 | 1           | AP003170.5 |
| ENSG00000156675 | 137.1438435 | 132.5196892 | 0.05013012   | 0.914444445 | 0.945526073 | RAB11FIP1  |
| ENSG00000171813 | 253.7826816 | 246.4357219 | 0.042803498  | 0.914454793 | 0.945526073 | PWWP2B     |
| ENSG00000251332 | 0.925067711 | 0.743759607 | 0.32154471   | 0.914462128 | 1           | AC021106.2 |
| ENSG00000207563 | 0.925067711 | 0.743759607 | 0.32154471   | 0.914462128 | 1           | MIR23B     |
| ENSG00000213619 | 0.925067711 | 0.743759607 | 0.32154471   | 0.914462128 | 1           | NDUFS3     |
| ENSG00000259235 | 0.925067711 | 0.743759607 | 0.32154471   | 0.914462128 | 1           | AC066612.1 |
| ENSG00000234617 | 14.92533785 | 15.90942288 | -0.087900559 | 0.914462741 | 0.945526073 | SNRK-AS1   |
| ENSG00000119737 | 27.35904022 | 25.85481719 | 0.080395491  | 0.91451839  | 0.945526073 | GPR75      |
| ENSG00000237126 | 8.85295579  | 9.354914215 | -0.081585877 | 0.914519252 | 0.945526073 | AC073254.1 |
| ENSG00000160766 | 39.57235592 | 40.73604549 | -0.045102946 | 0.914844259 | 0.945824461 | GBAP1      |
| ENSG00000263307 | 3.534005227 | 3.995060664 | -0.168475028 | 0.914884013 | 0.945827923 | AC007216.4 |
| ENSG00000285805 | 5.083377909 | 4.697526203 | 0.1197645    | 0.91496667  | 0.945843181 | AC012378.2 |
| ENSG00000145244 | 26.16107478 | 27.27395677 | -0.06634065  | 0.914974359 | 0.945843181 | CORIN      |
| ENSG00000234745 | 899.496957  | 1003.289931 | -0.157618271 | 0.915022284 | 0.945843181 | HLA-B      |
| ENSG00000151502 | 1195.154166 | 1178.765987 | 0.019922885  | 0.915077145 | 0.945843181 | VPS26B     |
| ENSG00000237753 | 50.09692976 | 51.5394966  | -0.043899938 | 0.915080797 | 0.945843181 | AC079922.2 |
| ENSG00000279476 | 1.215801261 | 1.00940975  | 0.241629383  | 0.9152578   | 1           | AC092139.3 |
| ENSG00000280054 | 4.590093848 | 4.953719736 | -0.118178551 | 0.915308045 | 0.946005657 | AC004241.5 |
| novel.706       | 23.66364143 | 22.37214359 | 0.07775236   | 0.915310812 | 0.946005657 | -          |
| ENSG00000278619 | 17.54849278 | 15.88490586 | 0.138939821  | 0.915462278 | 0.94612255  | MRM1       |
| ENSG00000163945 | 624.2251771 | 605.3017893 | 0.044772683  | 0.915496744 | 0.94612255  | UVSSA      |
| novel.1113      | 10.56454841 | 10.03731066 | 0.074253024  | 0.915597597 | 0.94618914  | -          |
| novel.966       | 2.142122621 | 2.395427609 | -0.179419311 | 0.91578595  | 0.946346144 | -          |
| ENSG00000240435 | 0.921306765 | 0.743759607 | 0.316599923  | 0.915792589 | 1           | RPS12P27   |
| ENSG00000229046 | 0.921306765 | 0.743759607 | 0.316599923  | 0.915792589 | 1           | HMG1P2     |
| ENSG00000270006 | 11.06911531 | 10.37609233 | 0.095163353  | 0.915835981 | 0.946360204 | AC010531.6 |
| ENSG00000285966 | 0.89358395  | 1.060160428 | -0.24595879  | 0.915836291 | 1           | AC007686.4 |
| ENSG00000249835 | 1.230916317 | 1.029478846 | 0.234202953  | 0.915848973 | 1           | VCAN-AS1   |
| ENSG00000267570 | 1.230916317 | 1.029478846 | 0.234202953  | 0.915848973 | 1           | STK25P1    |
| ENSG00000135968 | 951.6522359 | 975.037376  | -0.034761361 | 0.915951936 | 0.946442382 | GCC2       |
| ENSG00000223803 | 131.405005  | 128.6735073 | 0.031154282  | 0.915993798 | 0.946447996 | RPS20P14   |
| ENSG00000267289 | 2.71348926  | 2.42610919  | 0.147946698  | 0.916234318 | 0.946658865 | AC008752.2 |
| ENSG00000224448 | 0.894837599 | 1.060160428 | -0.244483469 | 0.916338034 | 1           | AC005020.1 |
| ENSG00000229567 | 2.052685933 | 2.455634897 | -0.257533866 | 0.916372466 | 0.94676395  | AL139421.1 |
| ENSG00000124444 | 207.7932753 | 203.2956569 | 0.031360956  | 0.916641999 | 0.947004763 | ZNF576     |
| ENSG00000145911 | 33.65495665 | 35.24742945 | -0.067791189 | 0.916911771 | 0.947208077 | N4BP3      |
| ENSG00000127948 | 1066.100873 | 1050.274912 | 0.021482129  | 0.916954403 | 0.947208077 | POR        |
| ENSG00000283849 | 3.948166524 | 3.415449845 | 0.200386952  | 0.916976709 | 0.947208077 | AC092053.2 |
| ENSG00000225764 | 1.774560141 | 2.139234076 | -0.26748602  | 0.917047329 | 0.947208077 | P3H2-AS1   |
| ENSG00000226367 | 1.774560141 | 2.139234076 | -0.26748602  | 0.917047329 | 0.947208077 | ST7-AS2    |
| ENSG00000268564 | 5.722726665 | 5.186248153 | 0.149063528  | 0.917057541 | 0.947208077 | AC003956.1 |
| ENSG00000152380 | 23.52197842 | 22.30834028 | 0.072247101  | 0.917130696 | 0.94724598  | FAM151B    |

|                 |             |             |              |             |             |            |
|-----------------|-------------|-------------|--------------|-------------|-------------|------------|
| ENSG00000255710 | 3.5743358   | 3.973835692 | -0.147158836 | 0.917171507 | 0.947250474 | AP003170.1 |
| ENSG00000135953 | 139.0712785 | 141.9895085 | -0.030626288 | 0.917238874 | 0.947282394 | MFS9       |
| ENSG00000266541 | 1.7871679   | 2.139234076 | -0.258312879 | 0.917455937 | 0.947468905 | AP001381.1 |
| ENSG00000271857 | 31.21937971 | 29.76574866 | 0.072177043  | 0.917560139 | 0.947522182 | AL096865.1 |
| ENSG00000094975 | 879.0674636 | 866.4508788 | 0.020961218  | 0.917607191 | 0.947522182 | SUCO       |
| ENSG00000287691 | 1.524157165 | 1.702418679 | -0.183353926 | 0.917616936 | 0.947522182 | AL031602.2 |
| ENSG00000170748 | 0.586481695 | 0.743759607 | -0.32221508  | 0.917773271 | 1           | RBMXL2     |
| ENSG00000254479 | 0.586481695 | 0.743759607 | -0.32221508  | 0.917773271 | 1           | SLC25A1P1  |
| ENSG00000233012 | 0.586481695 | 0.743759607 | -0.32221508  | 0.917773271 | 1           | HDAC1P2    |
| ENSG00000224451 | 0.586481695 | 0.743759607 | -0.32221508  | 0.917773271 | 1           | ATP5PBP1   |
| ENSG00000251880 | 0.586481695 | 0.743759607 | -0.32221508  | 0.917773271 | 1           | RNU7-75P   |
| ENSG00000268105 | 0.586481695 | 0.743759607 | -0.32221508  | 0.917773271 | 1           | AC124856.1 |
| ENSG00000267006 | 0.586481695 | 0.743759607 | -0.32221508  | 0.917773271 | 1           | AC008507.2 |
| ENSG00000234181 | 0.586481695 | 0.743759607 | -0.32221508  | 0.917773271 | 1           | AL353795.2 |
| ENSG00000265137 | 0.586481695 | 0.743759607 | -0.32221508  | 0.917773271 | 1           | MIR3192    |
| ENSG00000233347 | 0.586481695 | 0.743759607 | -0.32221508  | 0.917773271 | 1           | ERP29P1    |
| ENSG00000277453 | 0.586481695 | 0.743759607 | -0.32221508  | 0.917773271 | 1           | AC010271.2 |
| ENSG00000272610 | 1.200686205 | 1.386017859 | -0.216890763 | 0.917808411 | 1           | MAGI1-IT1  |
| ENSG00000167562 | 125.8216479 | 122.6072066 | 0.036284351  | 0.917815533 | 0.947689586 | ZNF701     |
| ENSG00000102221 | 125.4998144 | 121.2137871 | 0.049311068  | 0.917988461 | 0.947830474 | JADE3      |
| ENSG00000156136 | 669.6713203 | 683.2385894 | -0.02915964  | 0.918164362 | 0.947964048 | DCK        |
| ENSG00000205918 | 33.42501149 | 35.20497951 | -0.073319279 | 0.918190804 | 0.947964048 | PDPK2P     |
| ENSG00000254851 | 24.44808632 | 22.650414   | 0.112993161  | 0.918305285 | 0.948044569 | AP005018.2 |
| ENSG00000251739 | 5.498792855 | 5.032840245 | 0.125727332  | 0.91834906  | 0.948052089 | RNU6-1053P |
| ENSG00000172554 | 4.485542104 | 4.841605895 | -0.118726377 | 0.918690746 | 0.948367144 | SNTG2      |
| ENSG00000164749 | 2.373649595 | 2.058957692 | 0.196912902  | 0.918857182 | 0.948446944 | HNF4G      |
| ENSG00000250286 | 1.50778846  | 1.722487775 | -0.203898653 | 0.918910168 | 0.948446944 | AC021491.2 |
| ENSG00000261559 | 2.729857965 | 2.323323566 | 0.244478656  | 0.918910739 | 0.948446944 | FSCN1P1    |
| ENSG00000078747 | 1364.998598 | 1343.914978 | 0.022598956  | 0.91891407  | 0.948446944 | ITCH       |
| ENSG00000171608 | 852.9703082 | 891.3747277 | -0.063338582 | 0.919050082 | 0.948549644 | PIK3CD     |
| ENSG00000153363 | 120.4478211 | 117.0443976 | 0.03917948   | 0.919109097 | 0.948572871 | LINC00467  |
| ENSG00000279589 | 1.215801261 | 1.049547942 | 0.196574118  | 0.919163642 | 1           | AC079416.2 |
| ENSG00000259590 | 0.89358395  | 1.049547942 | -0.236246065 | 0.919176962 | 1           | LINC02244  |
| ENSG00000259918 | 16.35908941 | 15.64505701 | 0.060844511  | 0.919197501 | 0.948626426 | NDUFA5P11  |
| ENSG00000276845 | 0.615458159 | 0.774441189 | -0.314063564 | 0.919377812 | 1           | CR769775.1 |
| ENSG00000235330 | 0.615458159 | 0.774441189 | -0.314063564 | 0.919377812 | 1           | RPL12P25   |
| ENSG00000234676 | 0.615458159 | 0.774441189 | -0.314063564 | 0.919377812 | 1           | IFT74-AS1  |
| ENSG00000285644 | 0.615458159 | 0.774441189 | -0.314063564 | 0.919377812 | 1           | AC108448.3 |
| ENSG00000132874 | 0.615458159 | 0.774441189 | -0.314063564 | 0.919377812 | 1           | SLC14A2    |
| ENSG00000222005 | 10.17177041 | 9.599339387 | 0.083489655  | 0.919385726 | 0.94878299  | LINC01118  |
| ENSG00000188277 | 35.82423261 | 37.27454969 | -0.056726371 | 0.919507836 | 0.948871315 | C15orf62   |
| ENSG00000279452 | 13.31077508 | 12.57681796 | 0.073328661  | 0.919664753 | 0.948943672 | AC006277.1 |
| ENSG00000252866 | 0.894837599 | 1.049547942 | -0.234770386 | 0.919678862 | 1           | RNA5SP243  |
| ENSG00000102967 | 280.9252546 | 287.6527963 | -0.034661795 | 0.919769108 | 0.948943672 | DHODH      |
| novel.723       | 5.18033649  | 4.778958462 | 0.121962229  | 0.919770054 | 0.948943672 | -          |
| ENSG00000198908 | 1.541779519 | 1.844058227 | -0.256844277 | 0.91978445  | 0.948943672 | BHLHB9     |
| ENSG00000267595 | 3.286109548 | 3.668047357 | -0.149679629 | 0.919795771 | 0.948943672 | AC060780.3 |
| ENSG00000122257 | 1412.858212 | 1387.850372 | 0.025984658  | 0.919797101 | 0.948943672 | RBBP6      |
| ENSG00000253399 | 0.600343103 | 0.723690511 | -0.261661641 | 0.919951383 | 1           | AC078852.1 |
| ENSG00000134852 | 695.323869  | 706.5701025 | -0.023086892 | 0.920063922 | 0.949181256 | CLOCK      |
| ENSG00000224618 | 0.908699006 | 1.069617038 | -0.238607947 | 0.920107434 | 1           | AC096921.1 |

|                 |             |             |              |             |             |            |
|-----------------|-------------|-------------|--------------|-------------|-------------|------------|
| ENSG00000236986 | 3.328947419 | 3.688116453 | -0.139869273 | 0.92027637  | 0.94936273  | AL157938.2 |
| ENSG00000030304 | 8.592167619 | 9.282938566 | -0.108898877 | 0.92039923  | 0.949451775 | MUSK       |
| ENSG00000148842 | 211.147367  | 206.121303  | 0.035721201  | 0.920459465 | 0.949476212 | CNNM2      |
| ENSG00000277057 | 0.908699006 | 1.029478846 | -0.202998318 | 0.920527175 | 1           | MIR6779    |
| ENSG00000260366 | 0.601596751 | 0.723690511 | -0.259608861 | 0.920570109 | 1           | AC026803.1 |
| ENSG00000287302 | 0.601596751 | 0.723690511 | -0.259608861 | 0.920570109 | 1           | AL133477.3 |
| ENSG00000248527 | 4090.591812 | 3976.187032 | 0.040906627  | 0.920591315 | 0.949574518 | MTATP6P1   |
| ENSG00000105204 | 66.77738228 | 63.76841462 | 0.069380978  | 0.920790765 | 0.949742541 | DYRK1B     |
| ENSG00000257384 | 0.879722543 | 0.672939833 | 0.377208138  | 0.920904971 | 1           | AC009779.1 |
| ENSG00000218682 | 0.879722543 | 0.672939833 | 0.377208138  | 0.920904971 | 1           | AC064847.1 |
| ENSG00000153930 | 0.879722543 | 0.672939833 | 0.377208138  | 0.920904971 | 1           | ANKFN1     |
| ENSG00000260128 | 0.879722543 | 0.672939833 | 0.377208138  | 0.920904971 | 1           | ULK4P2     |
| ENSG00000228028 | 0.879722543 | 0.672939833 | 0.377208138  | 0.920904971 | 1           | AC069257.1 |
| ENSG00000233406 | 2.113146158 | 1.782695063 | 0.243888424  | 0.92096794  | 0.94984744  | AL162430.1 |
| ENSG00000172732 | 775.8927454 | 788.5815637 | -0.023715244 | 0.921019343 | 0.94984744  | MUS81      |
| ENSG00000006756 | 446.6957386 | 437.2029055 | 0.031671708  | 0.921035967 | 0.94984744  | ARSD       |
| ENSG00000189046 | 278.7603525 | 284.65679   | -0.030155198 | 0.921038704 | 0.94984744  | ALKBH2     |
| ENSG00000167646 | 5.747942182 | 5.421216714 | 0.0880453    | 0.921310425 | 0.950089949 | DNAAF3     |
| ENSG00000145868 | 803.7521922 | 792.5534471 | 0.020496312  | 0.921369531 | 0.950109795 | FBXO38     |
| ENSG00000142046 | 139.2422027 | 142.9191086 | -0.036046551 | 0.921402809 | 0.950109795 | TMEM91     |
| ENSG00000271384 | 0.925067711 | 0.713078025 | 0.370971004  | 0.921488615 | 1           | AL161729.3 |
| ENSG00000279314 | 0.925067711 | 0.713078025 | 0.370971004  | 0.921488615 | 1           | AC002525.1 |
| ENSG00000249309 | 0.925067711 | 0.713078025 | 0.370971004  | 0.921488615 | 1           | AC020703.1 |
| ENSG00000230552 | 0.925067711 | 0.713078025 | 0.370971004  | 0.921488615 | 1           | AC092162.2 |
| ENSG00000248515 | 0.925067711 | 0.713078025 | 0.370971004  | 0.921488615 | 1           | AC024230.1 |
| ENSG00000236829 | 9.040391245 | 8.539178959 | 0.080211653  | 0.921578262 | 0.950252999 | Z97634.1   |
| ENSG00000048462 | 1.218308559 | 1.029478846 | 0.223388919  | 0.921611705 | 1           | TNFRSF17   |
| ENSG00000266127 | 1.759445085 | 1.487519214 | 0.254607229  | 0.921681364 | 0.950321594 | ZNF415P1   |
| ENSG00000117748 | 684.7994645 | 699.1283412 | -0.030321271 | 0.921829466 | 0.950436579 | RPA2       |
| ENSG00000264920 | 61.59442378 | 63.53413521 | -0.046458521 | 0.921905482 | 0.950477235 | AC018521.5 |
| ENSG00000206675 | 1.480065645 | 1.702418679 | -0.210533632 | 0.921971769 | 0.950477834 | RNU6-32P   |
| ENSG00000129437 | 8.676589712 | 8.174339211 | 0.086189835  | 0.92197923  | 0.950477834 | KLK14      |
| ENSG00000234558 | 2.742465724 | 2.456790772 | 0.148966799  | 0.922119937 | 0.950556929 | API5P1     |
| ENSG00000271626 | 1.81990531  | 2.058957692 | -0.19104025  | 0.922129127 | 0.950556929 | AC104763.2 |
| ENSG00000261775 | 1.481319294 | 1.702418679 | -0.20954912  | 0.922337244 | 0.95073374  | AC012435.2 |
| ENSG00000237788 | 1.186824798 | 1.426156051 | -0.262767702 | 0.922525777 | 1           | AL162615.1 |
| ENSG00000136021 | 744.0778523 | 732.4461575 | 0.022461017  | 0.922528548 | 0.950893208 | SCYL2      |
| ENSG00000253961 | 0.921306765 | 0.713078025 | 0.365678921  | 0.922631423 | 1           | AC009563.1 |
| ENSG00000243532 | 0.921306765 | 0.713078025 | 0.365678921  | 0.922631423 | 1           | RN7SL19P   |
| ENSG00000199990 | 1.526664462 | 1.742556871 | -0.201942193 | 0.922684788 | 0.951009704 | VTRNA1-1   |
| ENSG00000169744 | 313.7381813 | 298.6880273 | 0.071340407  | 0.922717777 | 0.951009704 | LDB2       |
| ENSG00000285701 | 3.001715513 | 2.659793482 | 0.188138993  | 0.922751381 | 0.951009704 | AL357140.4 |
| ENSG00000278456 | 3.591958154 | 3.983292303 | -0.144919692 | 0.922790286 | 0.951012076 | AC015712.7 |
| ENSG00000248155 | 1.214547612 | 1.029478846 | 0.219875866  | 0.922841267 | 1           | CR545473.1 |
| ENSG00000285774 | 1.188078446 | 1.426156051 | -0.261478231 | 0.922903594 | 1           | AL133444.1 |
| ENSG00000265820 | 1.188078446 | 1.426156051 | -0.261478231 | 0.922903594 | 1           | MIR3177    |
| ENSG00000230076 | 0.586481695 | 0.774441189 | -0.380933817 | 0.922911374 | 1           | RPL10P6    |
| ENSG00000266946 | 0.586481695 | 0.774441189 | -0.380933817 | 0.922911374 | 1           | MRPL37P1   |
| ENSG00000285447 | 0.586481695 | 0.774441189 | -0.380933817 | 0.922911374 | 1           | ZNF883     |
| ENSG00000259388 | 0.586481695 | 0.774441189 | -0.380933817 | 0.922911374 | 1           | AC025040.2 |
| ENSG00000263677 | 0.586481695 | 0.774441189 | -0.380933817 | 0.922911374 | 1           | AC012588.1 |

|                 |             |             |              |             |             |                |
|-----------------|-------------|-------------|--------------|-------------|-------------|----------------|
| ENSG00000212420 | 0.586481695 | 0.774441189 | -0.380933817 | 0.922911374 | 1           | RNU6-1111P     |
| ENSG00000206824 | 0.586481695 | 0.774441189 | -0.380933817 | 0.922911374 | 1           | RF00019        |
| ENSG00000277463 | 2.461832635 | 2.171071533 | 0.180497069  | 0.923061838 | 0.9512542   | AC080038.3     |
| ENSG00000267855 | 11.12456094 | 11.81987733 | -0.077718779 | 0.9230994   | 0.951255177 | NDUFA7         |
| ENSG00000286237 | 0.925067711 | 1.080229524 | -0.22885413  | 0.923319928 | 1           | ARMCX5-GPRASP2 |
| ENSG00000258471 | 2.387511003 | 2.0188195   | 0.232170957  | 0.923379053 | 0.95150562  | AL161668.3     |
| ENSG00000169071 | 136.8737371 | 156.9423738 | -0.197593606 | 0.923466065 | 0.95155754  | ROR2           |
| ENSG00000236535 | 1.17296339  | 1.406086955 | -0.259579996 | 0.923513602 | 1           | RC3H1-IT1      |
| novel.898       | 3.255879435 | 2.954969332 | 0.152959622  | 0.923710164 | 0.951771317 | -              |
| ENSG00000243650 | 8.901777171 | 8.212165653 | 0.117900105  | 0.923773647 | 0.951798982 | RN7SL834P      |
| ENSG00000207280 | 3.282348601 | 3.566546002 | -0.117180657 | 0.92387598  | 0.951866671 | SNORD20        |
| ENSG00000177885 | 3080.082691 | 3040.060765 | 0.018927261  | 0.923962722 | 0.951918292 | GRB2           |
| ENSG00000168936 | 1321.496135 | 1299.992677 | 0.023442093  | 0.92402982  | 0.951949671 | TMEM129        |
| ENSG00000178429 | 13.06162575 | 13.60616841 | -0.060800857 | 0.924138131 | 0.952023504 | RPS3AP5        |
| ENSG00000254812 | 1.233423615 | 1.548882377 | -0.32158972  | 0.924204776 | 0.95205441  | AC067930.2     |
| ENSG00000225082 | 1.50778846  | 1.782695063 | -0.24264731  | 0.9242428   | 0.952055832 | DAP3P1         |
| ENSG00000132109 | 534.9555906 | 525.768909  | 0.024597839  | 0.924291721 | 0.952068477 | TRIM21         |
| ENSG00000258741 | 13.62414558 | 14.19652011 | -0.063214584 | 0.924354222 | 0.952095109 | H2AFVP1        |
| ENSG00000254093 | 8.252612688 | 7.46725017  | 0.141794157  | 0.924513955 | 0.952221886 | PINX1          |
| ENSG00000267405 | 3.916682763 | 3.484985349 | 0.181701049  | 0.924596048 | 0.952268688 | AC005180.1     |
| ENSG00000280248 | 5.160206839 | 5.533330555 | -0.089920375 | 0.924733281 | 0.952372275 | AC124319.5     |
| ENSG00000170791 | 631.0744784 | 640.9430622 | -0.022696416 | 0.924845023 | 0.952449602 | CHCHD7         |
| ENSG00000287502 | 1.214547612 | 1.386017859 | -0.203519169 | 0.924847016 | 1           | AC092418.2     |
| ENSG00000227540 | 24.91629705 | 25.71420512 | -0.047941076 | 0.925054472 | 0.952627541 | AC016394.1     |
| ENSG00000201176 | 2.052685933 | 1.733100261 | 0.242209724  | 0.925232485 | 0.952758093 | RNU6-853P      |
| ENSG00000142168 | 3202.291097 | 3247.974203 | -0.020475339 | 0.925278257 | 0.952758093 | SOD1           |
| ENSG00000278842 | 1.200686205 | 1.426156051 | -0.248454996 | 0.925280208 | 1           | AC008147.4     |
| ENSG00000213639 | 2378.450239 | 2415.740332 | -0.02237548  | 0.925291259 | 0.952758093 | PPP1CB         |
| ENSG00000164164 | 1071.732839 | 1055.748313 | 0.021715001  | 0.925438844 | 0.952872294 | OTUD4          |
| ENSG00000230641 | 0.923814062 | 0.774441189 | 0.274534804  | 0.925459822 | 1           | USP12-AS2      |
| ENSG00000243007 | 0.923814062 | 0.774441189 | 0.274534804  | 0.925459822 | 1           | RPL12P35       |
| ENSG00000269194 | 0.923814062 | 0.774441189 | 0.274534804  | 0.925459822 | 1           | AC006942.1     |
| ENSG00000164920 | 80.46996473 | 76.17154564 | 0.077803135  | 0.925568809 | 0.952968345 | OSR2           |
| ENSG00000244564 | 3.08105174  | 3.466200522 | -0.178514773 | 0.925619856 | 0.952983138 | AC096888.1     |
| ENSG00000197889 | 3.96328158  | 3.607840069 | 0.135630977  | 0.92572708  | 0.953055764 | MEIG1          |
| ENSG00000083099 | 611.8586701 | 601.0289162 | 0.025230455  | 0.925786036 | 0.953078694 | LYRM2          |
| ENSG00000232874 | 1.232169966 | 1.080229524 | 0.184749319  | 0.925819155 | 1           | AC080129.2     |
| ENSG00000265908 | 1.232169966 | 1.080229524 | 0.184749319  | 0.925819155 | 1           | AC024267.5     |
| ENSG00000244086 | 1.232169966 | 1.080229524 | 0.184749319  | 0.925819155 | 1           | AC110749.1     |
| ENSG00000217624 | 0.879722543 | 1.060160428 | -0.264662423 | 0.925833454 | 1           | AL627402.1     |
| ENSG00000252218 | 0.922560414 | 0.774441189 | 0.272897991  | 0.925908359 | 1           | RF00426        |
| ENSG00000274492 | 1.200686205 | 1.029478846 | 0.206058614  | 0.925921372 | 1           | AL121768.2     |
| ENSG00000267583 | 1.200686205 | 1.365948763 | -0.200245088 | 0.926034462 | 1           | AC007998.3     |
| ENSG00000214331 | 90.01761616 | 88.38411896 | 0.027226428  | 0.926034484 | 0.953296692 | AC009053.1     |
| ENSG00000287121 | 0.586481695 | 0.723690511 | -0.290355335 | 0.926042793 | 1           | AC007220.2     |
| novel.583       | 0.586481695 | 0.723690511 | -0.290355335 | 0.926042793 | 1           | -              |
| ENSG00000276380 | 0.586481695 | 0.723690511 | -0.290355335 | 0.926042793 | 1           | UBE2NL         |
| ENSG00000273980 | 0.586481695 | 0.723690511 | -0.290355335 | 0.926042793 | 1           | AL592071.1     |
| ENSG00000266370 | 0.586481695 | 0.723690511 | -0.290355335 | 0.926042793 | 1           | MIR3657        |
| ENSG00000244675 | 5.822263814 | 5.451898296 | 0.095827924  | 0.926117385 | 0.95334426  | AC108676.1     |
| ENSG00000236861 | 14.35397121 | 13.73719547 | 0.068349047  | 0.926194443 | 0.953379941 | AC006378.1     |

|                 |             |             |              |             |             |            |
|-----------------|-------------|-------------|--------------|-------------|-------------|------------|
| ENSG00000255817 | 1.759445085 | 1.426156051 | 0.304753297  | 0.926256146 | 0.953379941 | AC025576.2 |
| ENSG00000265293 | 2.639167628 | 3.208851114 | -0.280296433 | 0.926262132 | 0.953379941 | ARGFXP2    |
| novel.239       | 4.90095705  | 5.298490388 | -0.119313605 | 0.926510153 | 0.953597444 | -          |
| ENSG00000257097 | 0.925067711 | 1.110911105 | -0.260623599 | 0.926667397 | 1           | CLIP1-AS1  |
| ENSG00000230287 | 0.925067711 | 1.110911105 | -0.260623599 | 0.926667397 | 1           | AL445928.1 |
| ENSG00000285679 | 7.912773023 | 8.305366273 | -0.069224289 | 0.926690874 | 0.953745666 | AC079142.1 |
| ENSG00000160352 | 238.7162112 | 228.8686889 | 0.060901509  | 0.926727867 | 0.953745958 | ZNF714     |
| ENSG00000233668 | 0.894837599 | 1.029478846 | -0.214174943 | 0.926744675 | 1           | AL353662.2 |
| ENSG00000259416 | 0.894837599 | 1.029478846 | -0.214174943 | 0.926744675 | 1           | AC021739.3 |
| ENSG00000223930 | 1.232169966 | 1.406086955 | -0.202728828 | 0.926942183 | 1           | AC117453.1 |
| ENSG00000157014 | 514.8160243 | 506.5827697 | 0.023288398  | 0.927035526 | 0.954024796 | TATDN2     |
| ENSG00000226919 | 1.201939854 | 1.060160428 | 0.176700405  | 0.927287213 | 1           | AL365184.1 |
| ENSG00000268379 | 1.201939854 | 1.060160428 | 0.176700405  | 0.927287213 | 1           | AC025588.1 |
| ENSG00000139998 | 131.5154255 | 135.3634094 | -0.043012209 | 0.927346828 | 0.954270734 | RAB15      |
| ENSG00000127914 | 1001.477454 | 983.9265564 | 0.025716588  | 0.927403062 | 0.954270734 | AKAP9      |
| ENSG00000166352 | 181.449851  | 185.1786204 | -0.029892575 | 0.927464045 | 0.954270734 | C11orf74   |
| ENSG00000260941 | 24.81299896 | 23.80261917 | 0.066093446  | 0.927465037 | 0.954270734 | LINC00622  |
| ENSG00000101187 | 26.81184892 | 27.67867792 | -0.047038085 | 0.927490323 | 0.954270734 | SLCO4A1    |
| ENSG00000196366 | 3.328947419 | 3.566546002 | -0.102507366 | 0.927494884 | 0.954270734 | C9orf163   |
| ENSG00000227409 | 0.615458159 | 0.723690511 | -0.23663231  | 0.927509692 | 1           | ZMYM4-AS1  |
| ENSG00000108684 | 0.615458159 | 0.723690511 | -0.23663231  | 0.927509692 | 1           | ASIC2      |
| ENSG00000229133 | 0.615458159 | 0.723690511 | -0.23663231  | 0.927509692 | 1           | RPS7P4     |
| ENSG00000214837 | 0.615458159 | 0.723690511 | -0.23663231  | 0.927509692 | 1           | LINC01347  |
| ENSG00000252363 | 0.89358395  | 1.069617038 | -0.257664161 | 0.927721364 | 1           | RNU7-43P   |
| ENSG00000228513 | 0.89358395  | 1.069617038 | -0.257664161 | 0.927721364 | 1           | AC023271.1 |
| ENSG00000176731 | 291.5444654 | 285.6562636 | 0.030124642  | 0.927735045 | 0.95448003  | RBIS       |
| ENSG00000284188 | 1.526664462 | 1.722487775 | -0.188526636 | 0.927787952 | 0.95448202  | AL451007.3 |
| ENSG00000178031 | 628.8962979 | 605.3132571 | 0.054803201  | 0.927810454 | 0.95448202  | ADAMTSL1   |
| ENSG00000230593 | 0.894837599 | 1.069617038 | -0.25601137  | 0.928180516 | 1           | PPIAP40    |
| ENSG00000233929 | 0.894837599 | 1.069617038 | -0.25601137  | 0.928180516 | 1           | MT1XP1     |
| ENSG00000286281 | 0.894837599 | 1.069617038 | -0.25601137  | 0.928180516 | 1           | AL353152.2 |
| novel.51        | 25.24596499 | 24.22424576 | 0.0603608    | 0.928193613 | 0.954838385 | -          |
| ENSG00000269091 | 5.42697852  | 5.797824823 | -0.09070239  | 0.928269413 | 0.954847129 | AC010624.3 |
| ENSG00000102893 | 1041.959331 | 1024.499181 | 0.024039423  | 0.928299808 | 0.954847129 | PHKB       |
| ENSG00000252274 | 1.84261353  | 2.089639274 | -0.191352736 | 0.928312368 | 0.954847129 | RF00422    |
| ENSG00000242314 | 1.214547612 | 1.00940975  | 0.248736445  | 0.928316308 | 1           | RPL12P32   |
| ENSG00000283418 | 0.925067711 | 1.161661783 | -0.320215752 | 0.928570653 | 1           | RF00026    |
| ENSG00000237159 | 0.925067711 | 1.161661783 | -0.320215752 | 0.928570653 | 1           | CNTFR-AS1  |
| ENSG00000287308 | 0.925067711 | 1.161661783 | -0.320215752 | 0.928570653 | 1           | AC018802.2 |
| ENSG00000185947 | 252.2970319 | 247.6544273 | 0.02718294   | 0.928582046 | 0.955086704 | ZNF267     |
| ENSG00000226321 | 0.879722543 | 1.049547942 | -0.253461712 | 0.929005789 | 1           | CROCC2     |
| ENSG00000254295 | 0.879722543 | 1.049547942 | -0.253461712 | 0.929005789 | 1           | AC008429.3 |
| ENSG00000235018 | 0.879722543 | 1.049547942 | -0.253461712 | 0.929005789 | 1           | AL137077.1 |
| ENSG00000224186 | 11.55007635 | 12.04782942 | -0.065926421 | 0.929114773 | 0.955596806 | C5orf66    |
| ENSG00000287929 | 1.229662669 | 1.396630344 | -0.196632446 | 0.929127496 | 1           | AL354953.1 |
| ENSG00000200428 | 1.229662669 | 1.396630344 | -0.196632446 | 0.929127496 | 1           | RF00019    |
| ENSG00000228857 | 3.352909287 | 3.067083173 | 0.144464054  | 0.929179799 | 0.955625855 | AC104653.1 |
| ENSG00000165152 | 353.1346575 | 345.4929413 | 0.032373645  | 0.929376081 | 0.955766517 | TMEM246    |
| ENSG00000109536 | 9.621787074 | 10.14125216 | -0.080948115 | 0.929390142 | 0.955766517 | FRG1       |
| ENSG00000249661 | 6.422606917 | 6.776552991 | -0.083079091 | 0.929499172 | 0.955840807 | TNRC18P1   |
| ENSG0000048405  | 351.1717361 | 357.2851848 | -0.024861372 | 0.929612901 | 0.955903484 | ZNF800     |

|                 |             |             |              |             |             |            |
|-----------------|-------------|-------------|--------------|-------------|-------------|------------|
| ENSG00000147475 | 1406.920182 | 1381.843079 | 0.025695533  | 0.929633706 | 0.955903484 | ERLIN2     |
| ENSG00000223711 | 1.835020366 | 2.058957692 | -0.179996515 | 0.929688755 | 0.955922255 | AC069213.1 |
| ENSG00000181029 | 56.95397017 | 55.30647678 | 0.042765855  | 0.929738372 | 0.955934456 | TRAPPC5    |
| ENSG00000225850 | 3.063429386 | 2.742510011 | 0.143932152  | 0.929774208 | 0.955934456 | AL355490.1 |
| ENSG00000227124 | 109.8807654 | 107.6904637 | 0.026984637  | 0.929941494 | 0.956068614 | ZNF717     |
| ENSG00000286277 | 1.232169966 | 1.396630344 | -0.194312691 | 0.929963549 | 1           | AL009177.1 |
| ENSG00000258968 | 1.214547612 | 1.049547942 | 0.199413853  | 0.929985123 | 1           | AL049830.4 |
| ENSG00000251017 | 1.233423615 | 1.447381022 | -0.232539806 | 0.929999074 | 1           | AC093677.1 |
| ENSG00000275056 | 3.518890171 | 3.047014077 | 0.217283135  | 0.930162826 | 0.956258325 | AC020663.3 |
| ENSG00000228043 | 4.528379975 | 4.851062506 | -0.108921883 | 0.930236513 | 0.956296239 | AC114763.1 |
| ENSG00000171450 | 0.909952655 | 0.774441189 | 0.256214346  | 0.930476959 | 1           | CDK5R2     |
| ENSG00000249755 | 1.203193503 | 1.00940975  | 0.23641764   | 0.930518137 | 1           | AC083829.1 |
| ENSG00000255993 | 1.203193503 | 1.00940975  | 0.23641764   | 0.930518137 | 1           | PSMC1P9    |
| ENSG00000178997 | 1.203193503 | 1.00940975  | 0.23641764   | 0.930518137 | 1           | EXD1       |
| ENSG00000260132 | 1.203193503 | 1.00940975  | 0.23641764   | 0.930518137 | 1           | AL032819.1 |
| ENSG00000124313 | 385.1781278 | 378.3899276 | 0.026208501  | 0.930578676 | 0.956608186 | IQSEC2     |
| ENSG00000186523 | 6.841569346 | 6.298443528 | 0.117084686  | 0.930613598 | 0.956608186 | FAM86B1    |
| ENSG00000161328 | 5.895047063 | 5.298361994 | 0.162420608  | 0.930770218 | 0.956619511 | LRRC56     |
| ENSG00000226443 | 0.879722543 | 0.743759607 | 0.260664775  | 0.930814169 | 1           | GAPDHP32   |
| ENSG00000267476 | 0.879722543 | 0.743759607 | 0.260664775  | 0.930814169 | 1           | AC104365.1 |
| ENSG00000270387 | 0.879722543 | 0.743759607 | 0.260664775  | 0.930814169 | 1           | AC115621.1 |
| ENSG00000273590 | 0.879722543 | 0.743759607 | 0.260664775  | 0.930814169 | 1           | SMIM11B    |
| ENSG00000197561 | 0.879722543 | 0.743759607 | 0.260664775  | 0.930814169 | 1           | ELANE      |
| ENSG00000141294 | 17.97866677 | 18.77363174 | -0.063251564 | 0.930823602 | 0.956619511 | LRRC46     |
| ENSG00000221716 | 2.682005499 | 2.934900236 | -0.114459393 | 0.930834504 | 0.956619511 | SNORA11    |
| ENSG00000138175 | 950.35764   | 965.725276  | -0.022827068 | 0.93085759  | 0.956619511 | ARL3       |
| ENSG00000239419 | 1.759445085 | 1.518200796 | 0.228778374  | 0.93089699  | 0.956619511 | RN7SL535P  |
| ENSG00000221241 | 1.759445085 | 1.518200796 | 0.228778374  | 0.93089699  | 0.956619511 | SNORD88A   |
| ENSG00000131435 | 3141.304524 | 3049.266011 | 0.042984541  | 0.930907262 | 0.956619511 | PDLIM4     |
| ENSG00000286652 | 3.3831394   | 3.709341424 | -0.127723783 | 0.930919175 | 0.956619511 | AL021918.5 |
| ENSG00000272002 | 0.61420451  | 0.743759607 | -0.26987107  | 0.930919311 | 1           | AC010904.2 |
| ENSG00000228140 | 0.61420451  | 0.743759607 | -0.26987107  | 0.930919311 | 1           | AL031283.1 |
| ENSG00000196553 | 0.61420451  | 0.743759607 | -0.26987107  | 0.930919311 | 1           | CCDC196    |
| ENSG00000273797 | 0.61420451  | 0.743759607 | -0.26987107  | 0.930919311 | 1           | AL133445.2 |
| ENSG00000248830 | 0.61420451  | 0.743759607 | -0.26987107  | 0.930919311 | 1           | ZNF807     |
| ENSG00000232044 | 0.61420451  | 0.743759607 | -0.26987107  | 0.930919311 | 1           | SILC1      |
| ENSG00000014164 | 289.575632  | 283.2743209 | 0.031981277  | 0.931090229 | 0.956757445 | ZC3H3      |
| ENSG00000278719 | 1.22840902  | 1.029478846 | 0.24007924   | 0.931225861 | 1           | MCM8-AS1   |
| ENSG00000233086 | 1.200686205 | 1.00940975  | 0.233866962  | 0.931270689 | 1           | LNCARSR    |
| ENSG00000230696 | 1.200686205 | 1.00940975  | 0.233866962  | 0.931270689 | 1           | AC011753.2 |
| ENSG00000169184 | 57.38700712 | 54.55737016 | 0.0707687    | 0.931305821 | 0.956941133 | MN1        |
| ENSG00000175084 | 7.060773295 | 7.480174406 | -0.088689174 | 0.931424777 | 0.956992679 | DES        |
| novel.156       | 4.872051857 | 4.370512897 | 0.1579793    | 0.931445395 | 0.956992679 | -          |
| ENSG00000147145 | 12.25378881 | 11.58619304 | 0.080633907  | 0.931466489 | 0.956992679 | LPAR4      |
| ENSG00000241886 | 4.832974932 | 4.493239223 | 0.116425775  | 0.931503846 | 0.956993215 | AC112496.1 |
| ENSG00000272173 | 7.931649026 | 7.479018531 | 0.07986065   | 0.931590534 | 0.957036483 | U47924.2   |
| ENSG00000285728 | 71.36482629 | 69.31163414 | 0.0438046    | 0.931619633 | 0.957036483 | AC098484.4 |
| ENSG00000130962 | 350.2664983 | 344.8146201 | 0.022372494  | 0.931722613 | 0.957075151 | PRRG1      |
| ENSG00000102871 | 468.0216708 | 459.5466109 | 0.026086843  | 0.931730949 | 0.957075151 | TRADD      |
| ENSG00000261766 | 8.472785552 | 8.815441588 | -0.064610395 | 0.931820137 | 0.957128923 | AC133550.2 |
| ENSG00000213303 | 0.907445357 | 1.029478846 | -0.199153615 | 0.931859592 | 1           | AC008481.1 |

|                 |             |             |              |             |             |             |
|-----------------|-------------|-------------|--------------|-------------|-------------|-------------|
| ENSG00000186625 | 327.9704647 | 322.9681389 | 0.021615141  | 0.931885706 | 0.957158431 | KATNA1      |
| ENSG00000278338 | 1.186824798 | 1.029478846 | 0.193564437  | 0.932054467 | 1           | VWA8-AS1    |
| ENSG00000136688 | 0.616711807 | 0.743759607 | -0.265241427 | 0.932086194 | 1           | IL36G       |
| ENSG00000240418 | 0.616711807 | 0.743759607 | -0.265241427 | 0.932086194 | 1           | AC020917.1  |
| ENSG00000068650 | 583.4974485 | 575.5567989 | 0.020179994  | 0.932331606 | 0.957541183 | ATP11A      |
| ENSG00000262118 | 4.162071144 | 3.862877727 | 0.10519187   | 0.932333326 | 0.957541183 | MTCO1P28    |
| ENSG00000204128 | 32.7691084  | 30.8010881  | 0.090807496  | 0.932368918 | 0.957541183 | C2orf72     |
| ENSG00000158716 | 572.5114148 | 585.7942442 | -0.033584999 | 0.932442606 | 0.957579009 | DUSP23      |
| ENSG00000186704 | 2.739958426 | 2.985650913 | -0.109089843 | 0.932498965 | 0.957599036 | DTX2P1      |
| ENSG00000276256 | 163.7331833 | 156.3394834 | 0.065816042  | 0.932555533 | 0.957619276 | AC011043.1  |
| ENSG00000165716 | 68.01821308 | 70.47645958 | -0.049280612 | 0.932651617 | 0.957680091 | DIPK1B      |
| ENSG00000232442 | 153.2622469 | 150.2761712 | 0.0285566    | 0.932697327 | 0.957689177 | MHENCN      |
| ENSG00000125510 | 7.989601953 | 8.569732146 | -0.096475196 | 0.93278265  | 0.957738936 | OPRL1       |
| ENSG00000214626 | 0.909952655 | 1.029478846 | -0.196215976 | 0.932860271 | 1           | POLR3DP1    |
| ENSG00000259398 | 0.600343103 | 0.693008929 | -0.219680439 | 0.932944213 | 1           | AC090970.1  |
| ENSG00000129028 | 77.10735443 | 78.5605519  | -0.027678458 | 0.933031387 | 0.957956469 | THAP10      |
| ENSG00000227543 | 23.80984867 | 24.53131837 | -0.04470745  | 0.933103092 | 0.957992232 | SPAG5-AS1   |
| ENSG00000163597 | 1098.862944 | 1080.631886 | 0.024311195  | 0.933340404 | 0.95819801  | SNHG16      |
| ENSG00000065534 | 1533.24325  | 1583.431323 | -0.04633244  | 0.933413041 | 0.958234717 | MYLK        |
| ENSG00000266805 | 0.601596751 | 0.693008929 | -0.217626124 | 0.933563517 | 1           | AP005432.1  |
| ENSG00000270813 | 0.601596751 | 0.693008929 | -0.217626124 | 0.933563517 | 1           | NANOGNBP3   |
| ENSG00000227673 | 0.601596751 | 0.693008929 | -0.217626124 | 0.933563517 | 1           | AL162734.1  |
| ENSG00000244134 | 3.01557692  | 3.291439249 | -0.11908512  | 0.933613078 | 0.958371344 | RPS12P20    |
| ENSG00000221909 | 160.6750681 | 158.1384763 | 0.023058774  | 0.933634399 | 0.958371344 | FAM200A     |
| ENSG00000158315 | 26.65303392 | 27.77761074 | -0.053876485 | 0.933656791 | 0.958371344 | RHBDL2      |
| ENSG00000119673 | 316.8714319 | 310.3520815 | 0.029015122  | 0.933777539 | 0.95840237  | ACOT2       |
| ENSG00000121864 | 536.0544462 | 543.5993276 | -0.020165192 | 0.933784355 | 0.95840237  | ZNF639      |
| ENSG00000071889 | 841.4904807 | 852.9357412 | -0.01938628  | 0.93381989  | 0.95840237  | FAM3A       |
| ENSG00000282393 | 11.59166057 | 11.11869606 | 0.057402026  | 0.933834571 | 0.95840237  | AC016588.2  |
| ENSG00000135334 | 872.6779212 | 862.3908721 | 0.017114371  | 0.933940887 | 0.958473621 | AKIRIN2     |
| ENSG00000270903 | 2.361041837 | 2.099095884 | 0.167830737  | 0.934010565 | 0.958507267 | HNRNPA3P9   |
| ENSG00000204525 | 1446.09223  | 1215.749901 | 0.250211966  | 0.93406078  | 0.958520939 | HLA-C       |
| ENSG00000273353 | 1.17296339  | 1.365948763 | -0.223898381 | 0.934069434 | 1           | AL008718.3  |
| ENSG00000152475 | 64.62802215 | 66.46890705 | -0.040020812 | 0.934125612 | 0.958549608 | ZNF837      |
| ENSG00000270802 | 1.203193503 | 1.080229524 | 0.159916806  | 0.934172953 | 1           | AC005776.1  |
| ENSG00000183495 | 1227.196201 | 1244.987874 | -0.020588927 | 0.934307145 | 0.958698023 | EP400       |
| ENSG00000251730 | 0.61420451  | 0.774441189 | -0.323230292 | 0.934322482 | 1           | RF00394     |
| ENSG00000227160 | 0.61420451  | 0.774441189 | -0.323230292 | 0.934322482 | 1           | THEM7P      |
| ENSG00000221375 | 0.61420451  | 0.774441189 | -0.323230292 | 0.934322482 | 1           | RNU6ATAC23P |
| ENSG00000211780 | 0.61420451  | 0.774441189 | -0.323230292 | 0.934322482 | 1           | TRAV6       |
| ENSG00000261872 | 1.17296339  | 1.426156051 | -0.278975618 | 0.934768889 | 1           | AC002558.2  |
| ENSG00000236088 | 194.5576483 | 191.0755404 | 0.026482949  | 0.934788539 | 0.959154103 | COX10-AS1   |
| ENSG00000213413 | 3.825992426 | 3.475657132 | 0.136323691  | 0.934999419 | 0.959332593 | PVRIG       |
| ENSG00000185813 | 661.9503871 | 648.1139932 | 0.030123555  | 0.93506208  | 0.959345576 | PCYT2       |
| ENSG00000272853 | 20.52373912 | 19.86318948 | 0.049860669  | 0.935085923 | 0.959345576 | AC069544.1  |
| ENSG00000263393 | 1.201939854 | 1.345879667 | -0.181587851 | 0.935144415 | 1           | AC011825.2  |
| ENSG00000104825 | 1.201939854 | 1.345879667 | -0.181587851 | 0.935144415 | 1           | NFKBIB      |
| ENSG00000265222 | 0.616711807 | 0.774441189 | -0.318131836 | 0.935335148 | 1           | AC079336.2  |
| ENSG00000242971 | 0.616711807 | 0.774441189 | -0.318131836 | 0.935335148 | 1           | RN7SL233P   |
| ENSG00000238055 | 0.616711807 | 0.774441189 | -0.318131836 | 0.935335148 | 1           | Z98742.3    |
| ENSG00000228612 | 0.616711807 | 0.774441189 | -0.318131836 | 0.935335148 | 1           | HK2P1       |



|                 |             |             |              |             |             |            |
|-----------------|-------------|-------------|--------------|-------------|-------------|------------|
| ENSG00000273958 | 0.616711807 | 0.774441189 | -0.318131836 | 0.935335148 | 1           | AC009560.1 |
| ENSG00000182459 | 0.616711807 | 0.774441189 | -0.318131836 | 0.935335148 | 1           | TEX19      |
| ENSG00000253334 | 0.879722543 | 1.029478846 | -0.230494763 | 0.935491682 | 1           | AC132219.1 |
| ENSG00000249188 | 0.879722543 | 1.029478846 | -0.230494763 | 0.935491682 | 1           | ENPP7P1    |
| ENSG00000243403 | 0.879722543 | 1.029478846 | -0.230494763 | 0.935491682 | 1           | AC090543.2 |
| ENSG00000252494 | 0.879722543 | 1.029478846 | -0.230494763 | 0.935491682 | 1           | RNU6-126P  |
| ENSG00000202227 | 0.879722543 | 1.029478846 | -0.230494763 | 0.935491682 | 1           | RNU6-282P  |
| ENSG00000213612 | 0.879722543 | 0.713078025 | 0.305755019  | 0.935575716 | 1           | FAM220CP   |
| ENSG00000288068 | 0.879722543 | 0.713078025 | 0.305755019  | 0.935575716 | 1           | AC027088.5 |
| ENSG00000255556 | 0.879722543 | 0.713078025 | 0.305755019  | 0.935575716 | 1           | AC087203.2 |
| ENSG00000250413 | 0.879722543 | 0.713078025 | 0.305755019  | 0.935575716 | 1           | AC005674.1 |
| ENSG00000260185 | 0.879722543 | 0.713078025 | 0.305755019  | 0.935575716 | 1           | AC009097.1 |
| ENSG00000253366 | 0.879722543 | 0.713078025 | 0.305755019  | 0.935575716 | 1           | AC139272.1 |
| ENSG00000241416 | 0.879722543 | 0.713078025 | 0.305755019  | 0.935575716 | 1           | KRT8P13    |
| ENSG00000274818 | 8.547107184 | 8.918098818 | -0.06593911  | 0.935709251 | 0.959947169 | AC004825.2 |
| ENSG00000119681 | 2511.78404  | 2627.060876 | -0.064796777 | 0.935971191 | 0.96017798  | LTBP2      |
| ENSG00000204978 | 0.894837599 | 0.774441189 | 0.236065899  | 0.93598923  | 1           | ERICH4     |
| ENSG00000267220 | 0.894837599 | 0.774441189 | 0.236065899  | 0.93598923  | 1           | AC011447.2 |
| ENSG00000198153 | 0.894837599 | 0.774441189 | 0.236065899  | 0.93598923  | 1           | ZNF849P    |
| ENSG00000176407 | 1129.857933 | 1118.166846 | 0.014813028  | 0.9360277   | 0.960198037 | KCMF1      |
| ENSG00000278896 | 1.233423615 | 1.080229524 | 0.187461095  | 0.936146922 | 1           | AC025031.5 |
| ENSG00000264204 | 18.32617087 | 17.25555934 | 0.082879703  | 0.936156158 | 0.960291896 | AGAP7P     |
| ENSG00000273142 | 88.9744913  | 90.63649436 | -0.025144171 | 0.936324736 | 0.960402071 | LINC02604  |
| ENSG00000152292 | 4.559863736 | 4.320918095 | 0.077570609  | 0.936337495 | 0.960402071 | SH2D6      |
| ENSG00000133315 | 316.6601924 | 310.7745475 | 0.028045393  | 0.936442649 | 0.960461424 | MACROD1    |
| ENSG00000250282 | 0.89358395  | 0.774441189 | 0.234398917  | 0.936445098 | 1           | AC002401.2 |
| ENSG00000233493 | 16.16789301 | 15.48219249 | 0.055084768  | 0.936469296 | 0.960461424 | TMEM238    |
| ENSG00000135702 | 1.200686205 | 1.060160428 | 0.176519783  | 0.936495532 | 1           | CHST5      |
| ENSG00000284292 | 2.359788188 | 2.679862578 | -0.167174678 | 0.936533291 | 0.960489141 | AC004922.1 |
| ENSG00000270532 | 2.698374204 | 2.92428775  | -0.104705302 | 0.936680882 | 0.960602589 | PEBP1P2    |
| ENSG00000258466 | 0.600343103 | 0.713078025 | -0.24846231  | 0.936682865 | 1           | AL049779.1 |
| ENSG00000230099 | 0.600343103 | 0.713078025 | -0.24846231  | 0.936682865 | 1           | TRBV5-4    |
| ENSG00000216721 | 0.600343103 | 0.713078025 | -0.24846231  | 0.936682865 | 1           | AC093850.1 |
| ENSG00000258136 | 6.081513603 | 5.797824823 | 0.071353875  | 0.936835985 | 0.960685818 | AC007622.2 |
| ENSG00000271075 | 6.816353828 | 6.409401493 | 0.090959368  | 0.936868347 | 0.960685818 | AL139317.4 |
| ENSG00000127483 | 3847.774471 | 3888.809228 | -0.015333311 | 0.936872968 | 0.960685818 | HP1BP3     |
| ENSG00000011083 | 2.3900183   | 2.649180997 | -0.128368148 | 0.936956654 | 0.960733713 | SLC6A7     |
| ENSG00000231908 | 10.42120448 | 9.875602015 | 0.070013613  | 0.937109671 | 0.960852692 | IDH1-AS1   |
| ENSG00000215217 | 4.611548419 | 4.94310725  | -0.107225154 | 0.937199071 | 0.960906435 | C5orf49    |
| ENSG00000207175 | 0.601596751 | 0.713078025 | -0.246120181 | 0.937270865 | 1           | RNU1-67P   |
| novel.282       | 0.601596751 | 0.713078025 | -0.246120181 | 0.937270865 | 1           | -          |
| ENSG00000285258 | 0.601596751 | 0.713078025 | -0.246120181 | 0.937270865 | 1           | ATXN7      |
| ENSG00000242435 | 0.601596751 | 0.713078025 | -0.246120181 | 0.937270865 | 1           | UPK3BP1    |
| ENSG00000256361 | 0.601596751 | 0.713078025 | -0.246120181 | 0.937270865 | 1           | AC027544.1 |
| ENSG00000261535 | 0.601596751 | 0.713078025 | -0.246120181 | 0.937270865 | 1           | AC005086.1 |
| ENSG00000272337 | 0.601596751 | 0.713078025 | -0.246120181 | 0.937270865 | 1           | RNU6-90P   |
| novel.894       | 18.73323755 | 16.88956371 | 0.147576694  | 0.937317888 | 0.960990334 | -          |
| ENSG00000253024 | 1.233423615 | 1.00940975  | 0.27585292   | 0.937335139 | 1           | RNU6-1238P |
| ENSG00000008382 | 139.3884812 | 141.4120339 | -0.020338108 | 0.937486756 | 0.961112762 | MPND       |
| ENSG00000158373 | 79.15448413 | 81.5965683  | -0.0432261   | 0.937511286 | 0.961112762 | HIST1H2BD  |
| ENSG00000177189 | 1185.271104 | 1166.2345   | 0.023474484  | 0.937625437 | 0.96115916  | RPS6KA3    |

|                 |             |             |              |             |             |             |
|-----------------|-------------|-------------|--------------|-------------|-------------|-------------|
| ENSG00000103522 | 32.37228437 | 30.91260682 | 0.062086011  | 0.937633775 | 0.96115916  | IL21R       |
| ENSG00000236529 | 1.535511275 | 1.762625967 | -0.204996217 | 0.937667529 | 0.96115916  | AC093582.1  |
| ENSG00000286302 | 2.402626059 | 2.231278821 | 0.122637442  | 0.937751587 | 0.961207401 | AC084724.1  |
| ENSG00000240591 | 6.861698997 | 7.285344037 | -0.078423601 | 0.937842573 | 0.961262738 | AL096701.3  |
| ENSG00000213123 | 42.63424693 | 43.98952991 | -0.044486619 | 0.937917127 | 0.96130123  | TCTEX1D2    |
| ENSG00000251639 | 0.922560414 | 1.029478846 | -0.181273203 | 0.937954358 | 1           | AC092535.2  |
| ENSG00000115325 | 1015.579694 | 1040.2925   | -0.034964131 | 0.938051978 | 0.961401517 | DOK1        |
| novel.483       | 897.0844298 | 871.3173802 | 0.042179737  | 0.938261023 | 0.961577833 | -           |
| ENSG00000271580 | 3.255879435 | 3.555933516 | -0.124858201 | 0.938452487 | 0.961635385 | AL583832.1  |
| ENSG00000204334 | 3.076037145 | 2.772035718 | 0.138562202  | 0.938454404 | 0.961635385 | ERICH2      |
| ENSG00000248265 | 9.35884761  | 9.814110458 | -0.06345915  | 0.938458869 | 0.961635385 | AC023794.1  |
| ENSG00000260082 | 0.586481695 | 0.693008929 | -0.242261555 | 0.938486409 | 1           | AC106886.1  |
| ENSG00000232037 | 0.586481695 | 0.693008929 | -0.242261555 | 0.938486409 | 1           | AL590556.1  |
| ENSG00000245768 | 0.586481695 | 0.693008929 | -0.242261555 | 0.938486409 | 1           | AC106793.1  |
| ENSG00000215367 | 0.586481695 | 0.693008929 | -0.242261555 | 0.938486409 | 1           | TMED11P     |
| ENSG00000214289 | 0.586481695 | 0.693008929 | -0.242261555 | 0.938486409 | 1           | RPL39P5     |
| ENSG00000230988 | 0.586481695 | 0.693008929 | -0.242261555 | 0.938486409 | 1           | RPL23AP11   |
| ENSG00000259505 | 0.586481695 | 0.693008929 | -0.242261555 | 0.938486409 | 1           | AC009268.1  |
| ENSG00000261248 | 0.586481695 | 0.693008929 | -0.242261555 | 0.938486409 | 1           | AC009120.4  |
| ENSG00000137962 | 1323.420695 | 1384.637194 | -0.065341348 | 0.938495479 | 0.961635385 | ARHGAP29    |
| ENSG00000226856 | 3.079798091 | 2.772035718 | 0.140418237  | 0.938502245 | 0.961635385 | THORLNC     |
| ENSG00000210117 | 0.879722543 | 1.069617038 | -0.278400971 | 0.938521215 | 1           | MT-TW       |
| ENSG00000161133 | 0.879722543 | 1.069617038 | -0.278400971 | 0.938521215 | 1           | USP41       |
| ENSG00000207098 | 0.879722543 | 1.069617038 | -0.278400971 | 0.938521215 | 1           | RF00156     |
| ENSG00000201586 | 1.22840902  | 1.00940975  | 0.270480901  | 0.93857256  | 1           | RNU6-593P   |
| ENSG00000124664 | 0.923814062 | 1.069617038 | -0.217835978 | 0.938806057 | 1           | SPDEF       |
| ENSG00000286314 | 2.067800989 | 1.874739808 | 0.158102839  | 0.938853301 | 0.961957156 | AC010359.2  |
| ENSG00000159885 | 59.12965658 | 60.21774657 | -0.02520119  | 0.939062437 | 0.962133495 | ZNF222      |
| ENSG00000165621 | 0.61420451  | 0.723690511 | -0.237990715 | 0.93919276  | 1           | OXGR1       |
| ENSG00000276298 | 0.61420451  | 0.723690511 | -0.237990715 | 0.93919276  | 1           | AC234782.4  |
| ENSG00000241770 | 0.61420451  | 0.723690511 | -0.237990715 | 0.93919276  | 1           | AC104411.1  |
| ENSG00000271043 | 0.61420451  | 0.723690511 | -0.237990715 | 0.93919276  | 1           | MTRNR2L2    |
| ENSG00000226977 | 0.61420451  | 0.723690511 | -0.237990715 | 0.93919276  | 1           | HMG1P24     |
| ENSG00000261468 | 33.99917017 | 34.93334038 | -0.036805985 | 0.939272142 | 0.962295912 | AC096921.2  |
| ENSG00000243055 | 5.13624497  | 5.533330555 | -0.100900912 | 0.939295035 | 0.962295912 | GK-AS1      |
| ENSG00000258512 | 1.233423615 | 1.060160428 | 0.211155441  | 0.939425568 | 1           | LINC00239   |
| ENSG00000257599 | 11.79539346 | 12.33123691 | -0.068043473 | 0.93948402  | 0.962451572 | OVCH1-AS1   |
| ENSG00000105810 | 1322.734374 | 1301.171051 | 0.023825146  | 0.939577612 | 0.962509499 | CDK6        |
| ENSG00000197312 | 597.5129488 | 590.1197942 | 0.018214706  | 0.93968902  | 0.962578243 | DDI2        |
| ENSG00000137992 | 555.4616639 | 562.0445331 | -0.017495071 | 0.939718816 | 0.962578243 | DBT         |
| ENSG00000265692 | 5.630782679 | 5.992655192 | -0.089587082 | 0.93975923  | 0.96258169  | LINC01970   |
| ENSG00000254867 | 1.215801261 | 1.345879667 | -0.168462725 | 0.939830637 | 1           | AP006287.1  |
| ENSG00000203706 | 6.696971762 | 7.126075539 | -0.100109184 | 0.939960956 | 0.962750359 | SERTAD4-AS1 |
| ENSG00000157168 | 1566.48416  | 1644.834312 | -0.070350088 | 0.940040691 | 0.962792916 | NRG1        |
| ENSG00000234964 | 165.3290981 | 162.3921706 | 0.025578158  | 0.940076621 | 0.962792916 | FABP5P7     |
| ENSG00000173264 | 554.7319367 | 562.2943524 | -0.019975647 | 0.940186086 | 0.96286707  | GPR137      |
| ENSG00000047597 | 3.384393048 | 3.718798035 | -0.132220964 | 0.940275216 | 0.96289058  | XK          |
| ENSG00000245248 | 4.237646425 | 4.494523493 | -0.095995157 | 0.940283165 | 0.96289058  | USP2-AS1    |
| ENSG00000225616 | 0.616711807 | 0.723690511 | -0.233359561 | 0.940359913 | 1           | AL138785.1  |
| ENSG00000279288 | 1.535511275 | 1.742556871 | -0.190907196 | 0.940386853 | 0.962930972 | AC073346.2  |
| ENSG00000165874 | 15.12942674 | 15.55185639 | -0.045348795 | 0.940396735 | 0.962930972 | SHLD2P1     |

|                 |              |             |              |             |             |            |
|-----------------|--------------|-------------|--------------|-------------|-------------|------------|
| ENSG00000145526 | 0.615458159  | 0.693008929 | -0.194632551 | 0.940508845 | 1           | CDH18      |
| ENSG00000272473 | 0.615458159  | 0.693008929 | -0.194632551 | 0.940508845 | 1           | AC006273.1 |
| ENSG00000285763 | 0.615458159  | 0.693008929 | -0.194632551 | 0.940508845 | 1           | AL358777.1 |
| ENSG00000259940 | 2.756327131  | 2.52645467  | 0.123975352  | 0.940532422 | 0.963031956 | AC109449.1 |
| ENSG00000120697 | 719.8810944  | 711.9762379 | 0.015671573  | 0.940673149 | 0.963138092 | ALG5       |
| ENSG00000073464 | 139.8033545  | 137.0134891 | 0.028463588  | 0.940756331 | 0.963185302 | CLCN4      |
| ENSG00000165905 | 4.929933513  | 5.290189653 | -0.10802204  | 0.94080885  | 0.963201117 | LARGE2     |
| ENSG00000044459 | 300.5384282  | 304.7731717 | -0.020538171 | 0.940901018 | 0.963257    | CNTLN      |
| ENSG00000236548 | 17.11566894  | 16.30866862 | 0.061850438  | 0.940937585 | 0.963257    | RNF217-AS1 |
| ENSG00000231587 | 7.771651652  | 7.389285537 | 0.06982938   | 0.9410729   | 0.963357566 | SNORD62B   |
| ENSG00000287054 | 0.921306765  | 1.060160428 | -0.209564708 | 0.9411543   | 1           | AC113410.5 |
| ENSG00000245330 | 2.415233817  | 2.200597239 | 0.140307295  | 0.941209772 | 0.963459717 | AP005717.1 |
| ENSG00000266934 | 3.578096747  | 3.861721852 | -0.112445285 | 0.941270041 | 0.963483451 | AC005746.1 |
| ENSG00000227375 | 1.201939854  | 1.069617038 | 0.167127351  | 0.94128584  | 1           | DLG1-AS1   |
| ENSG00000273350 | 5.099746614  | 4.871003207 | 0.083511445  | 0.941331318 | 0.963508213 | AC004832.5 |
| ENSG00000243230 | 3.04831433   | 3.230076085 | -0.086824597 | 0.941452477 | 0.963570551 | AC011005.4 |
| ENSG00000158636 | 399.3948105  | 404.2933118 | -0.01757644  | 0.941466396 | 0.963570551 | EMSY       |
| ENSG00000248909 | 2.66939774   | 2.415496705 | 0.138222871  | 0.941567413 | 0.963635978 | HMGB1P21   |
| ENSG00000113916 | 944.1944685  | 926.1751738 | 0.028118416  | 0.941621596 | 0.963653472 | BCL6       |
| ENSG00000272691 | 2.726097019  | 2.904218654 | -0.085481629 | 0.941799018 | 0.96379708  | AC092807.2 |
| ENSG00000272079 | 1.230916317  | 1.069617038 | 0.196834558  | 0.941988571 | 1           | AC004233.2 |
| ENSG00000138709 | 420.52688575 | 414.1577065 | 0.022388572  | 0.942073361 | 0.964006335 | LARP1B     |
| ENSG00000087842 | 155.0910977  | 150.9181383 | 0.037707685  | 0.942077705 | 0.964006335 | PIR        |
| ENSG00000034239 | 11.02147631  | 11.56856408 | -0.075572468 | 0.9422937   | 0.964181367 | EFCAB1     |
| ENSG00000157542 | 2.46684723   | 2.169915658 | 0.183787206  | 0.942322977 | 0.964181367 | KCNJ6      |
| ENSG00000158882 | 241.6651143  | 238.3370484 | 0.018867393  | 0.942365927 | 0.964187341 | TOMM40L    |
| ENSG00000288046 | 0.925067711  | 1.060160428 | -0.204690698 | 0.942512949 | 1           | AL031123.5 |
| ENSG00000256351 | 1.186824798  | 1.060160428 | 0.163469555  | 0.942571528 | 1           | AC007834.2 |
| ENSG00000183248 | 2.771442187  | 2.567748738 | 0.112751008  | 0.942677753 | 0.964461918 | PRR36      |
| ENSG00000162510 | 5.963100452  | 6.298443528 | -0.082095832 | 0.942708533 | 0.964461918 | MATN1      |
| ENSG00000223787 | 0.925067711  | 0.774441189 | 0.268704553  | 0.942732514 | 1           | AL354890.1 |
| ENSG00000253557 | 0.925067711  | 0.774441189 | 0.268704553  | 0.942732514 | 1           | AC100849.1 |
| ENSG00000253326 | 0.925067711  | 0.774441189 | 0.268704553  | 0.942732514 | 1           | AL606534.4 |
| ENSG00000287237 | 0.925067711  | 0.774441189 | 0.268704553  | 0.942732514 | 1           | AC073655.3 |
| ENSG00000249984 | 1.522903516  | 1.365948763 | 0.132390611  | 0.94275415  | 0.964470608 | AC026780.2 |
| ENSG00000277610 | 2.052685933  | 1.813376645 | 0.184652341  | 0.942953756 | 0.964603741 | RNVU1-4    |
| ENSG00000266601 | 3.357923882  | 3.52640781  | -0.082102995 | 0.94295854  | 0.964603741 | AC018521.6 |
| ENSG00000206532 | 7.212892771  | 7.510855988 | -0.057005621 | 0.943118722 | 0.964729616 | AC117402.1 |
| ENSG00000074621 | 236.1621332  | 232.3495303 | 0.022222852  | 0.943426057 | 0.965006    | SLC24A1    |
| ENSG00000230358 | 3.034452922  | 3.189937893 | -0.079775585 | 0.943468683 | 0.965011608 | SPDYE21P   |
| ENSG00000172497 | 2.722336072  | 2.954969332 | -0.10933769  | 0.9436207   | 0.9651291   | ACOT12     |
| ENSG00000223882 | 1.186824798  | 1.345879667 | -0.191395769 | 0.943641523 | 1           | ABCC5-AS1  |
| ENSG00000272885 | 2.403879708  | 2.261960402 | 0.109316677  | 0.943672774 | 0.965144366 | AC092574.1 |
| ENSG00000239670 | 0.615458159  | 0.713078025 | -0.220099127 | 0.943817392 | 1           | AL355864.2 |
| ENSG00000182687 | 0.615458159  | 0.713078025 | -0.220099127 | 0.943817392 | 1           | GALR2      |
| ENSG00000287400 | 0.615458159  | 0.713078025 | -0.220099127 | 0.943817392 | 1           | AC093151.8 |
| ENSG00000068400 | 879.6839334  | 888.7085159 | -0.014428741 | 0.943819834 | 0.965256775 | GRIPAP1    |
| ENSG00000136881 | 0.921306765  | 0.774441189 | 0.263407659  | 0.943880674 | 1           | BAAT       |
| ENSG00000271963 | 0.921306765  | 0.774441189 | 0.263407659  | 0.943880674 | 1           | AC026786.2 |
| ENSG00000273167 | 0.921306765  | 0.774441189 | 0.263407659  | 0.943880674 | 1           | AL359736.1 |
| ENSG00000256282 | 3.936883685  | 4.199347643 | -0.099588734 | 0.943949894 | 0.965351789 | AC112694.1 |

|                 |             |             |              |             |             |            |
|-----------------|-------------|-------------|--------------|-------------|-------------|------------|
| ENSG00000185684 | 419.6139699 | 425.5589581 | -0.020095025 | 0.944006084 | 0.965371253 | EP400P1    |
| ENSG00000213014 | 1.230916317 | 1.110911105 | 0.155483145  | 0.94403793  | 1           | VN2R17P    |
| ENSG00000144560 | 767.1806816 | 757.7863108 | 0.01808396   | 0.944103489 | 0.965432863 | VGLL4      |
| ENSG00000226383 | 6.138212882 | 6.533412089 | -0.099206232 | 0.944165191 | 0.965457959 | LINC01876  |
| ENSG00000205790 | 10.44104939 | 10.97461637 | -0.064508466 | 0.944221828 | 0.965477875 | DPP9-AS1   |
| ENSG00000226276 | 0.586481695 | 0.713078025 | -0.27753801  | 0.944320381 | 1           | AC093382.1 |
| ENSG00000233523 | 0.586481695 | 0.713078025 | -0.27753801  | 0.944320381 | 1           | PHBP5      |
| ENSG00000113889 | 0.586481695 | 0.713078025 | -0.27753801  | 0.944320381 | 1           | KNG1       |
| ENSG00000207162 | 0.586481695 | 0.713078025 | -0.27753801  | 0.944320381 | 1           | RNU6-549P  |
| ENSG00000259362 | 0.586481695 | 0.713078025 | -0.27753801  | 0.944320381 | 1           | AC046168.1 |
| ENSG00000242602 | 0.586481695 | 0.713078025 | -0.27753801  | 0.944320381 | 1           | AC008953.1 |
| ENSG00000253213 | 0.586481695 | 0.713078025 | -0.27753801  | 0.944320381 | 1           | AC010306.1 |
| ENSG00000279237 | 0.586481695 | 0.713078025 | -0.27753801  | 0.944320381 | 1           | AL161773.1 |
| ENSG00000188770 | 0.586481695 | 0.713078025 | -0.27753801  | 0.944320381 | 1           | OPTC       |
| ENSG00000199349 | 0.586481695 | 0.713078025 | -0.27753801  | 0.944320381 | 1           | RF00019    |
| ENSG00000207117 | 0.586481695 | 0.713078025 | -0.27753801  | 0.944320381 | 1           | RF00019    |
| ENSG00000251774 | 0.586481695 | 0.713078025 | -0.27753801  | 0.944320381 | 1           | RNU6-377P  |
| ENSG00000261970 | 0.586481695 | 0.713078025 | -0.27753801  | 0.944320381 | 1           | AL391840.2 |
| ENSG00000229822 | 0.586481695 | 0.713078025 | -0.27753801  | 0.944320381 | 1           | AL353691.1 |
| ENSG00000228292 | 0.586481695 | 0.713078025 | -0.27753801  | 0.944320381 | 1           | AL512604.1 |
| ENSG00000251934 | 0.586481695 | 0.713078025 | -0.27753801  | 0.944320381 | 1           | RNU6-1143P |
| ENSG00000221333 | 0.586481695 | 0.713078025 | -0.27753801  | 0.944320381 | 1           | MIR548K    |
| ENSG00000266467 | 0.586481695 | 0.713078025 | -0.27753801  | 0.944320381 | 1           | RN7SL220P  |
| ENSG00000241890 | 0.586481695 | 0.713078025 | -0.27753801  | 0.944320381 | 1           | RPL13P4    |
| ENSG00000240927 | 0.921306765 | 1.049547942 | -0.198357776 | 0.944327292 | 1           | RN7SL209P  |
| ENSG00000259544 | 0.921306765 | 1.049547942 | -0.198357776 | 0.944327292 | 1           | AC021739.4 |
| ENSG00000266924 | 1.233423615 | 1.396630344 | -0.18855603  | 0.944369774 | 1           | AC021594.1 |
| ENSG00000183977 | 9.502120274 | 9.047970004 | 0.075362282  | 0.94444254  | 0.965665551 | PP2D1      |
| ENSG00000259515 | 7.166293954 | 6.888666832 | 0.064694134  | 0.944573532 | 0.965730325 | AL117209.1 |
| ENSG00000177788 | 98.69241023 | 100.8279021 | -0.033077411 | 0.944580233 | 0.965730325 | AL162595.1 |
| ENSG00000205133 | 535.7810777 | 541.2375225 | -0.014229738 | 0.944846611 | 0.965953788 | TRIQQ      |
| ENSG00000225213 | 6.507997925 | 6.929960899 | -0.082433701 | 0.94487316  | 0.965953788 | AC073367.1 |
| ENSG00000030419 | 275.609709  | 285.2216909 | -0.049921382 | 0.945003282 | 0.9660488   | IKZF2      |
| ENSG00000229267 | 2.446717578 | 2.679862578 | -0.115584749 | 0.945183002 | 0.966194507 | SNHG31     |
| ENSG00000154133 | 220.4392011 | 228.138693  | -0.048846118 | 0.945263778 | 0.966239061 | ROBO4      |
| ENSG00000008441 | 1507.157719 | 1529.187851 | -0.021081083 | 0.945305676 | 0.966243873 | NFIX       |
| ENSG00000228446 | 2.712235611 | 2.578361223 | 0.087998445  | 0.945487252 | 0.96637894  | AC073052.1 |
| ENSG00000137133 | 8.005685923 | 8.429376869 | -0.074985035 | 0.945512207 | 0.96637894  | HINT2      |
| ENSG00000286837 | 0.925067711 | 1.049547942 | -0.193483306 | 0.945685959 | 1           | AC087533.1 |
| ENSG00000118976 | 1.510295757 | 1.365948763 | 0.122248038  | 0.945692795 | 0.966525491 | OTUD4P1    |
| ENSG00000219553 | 1.229662669 | 1.110911105 | 0.154003349  | 0.945860861 | 1           | AL031133.1 |
| ENSG00000176358 | 6.774769606 | 6.287831042 | 0.106717619  | 0.945895992 | 0.966695137 | TAC4       |
| ENSG00000271737 | 35.49442214 | 34.76217513 | 0.031248162  | 0.946090279 | 0.966855663 | AC008608.2 |
| ENSG00000273026 | 8.242512227 | 8.540334834 | -0.056832194 | 0.946164862 | 0.966893852 | AL358472.3 |
| ENSG00000250909 | 8.682857955 | 9.119945653 | -0.064141391 | 0.946373644 | 0.96706917  | AC138956.1 |
| ENSG00000226797 | 2.34592678  | 2.649180997 | -0.164065895 | 0.946488759 | 0.967148763 | AC005828.1 |
| novel.737       | 43.96405965 | 42.51488775 | 0.050815982  | 0.946621477 | 0.967239513 | -          |
| ENSG00000136738 | 549.0552828 | 544.2592961 | 0.012513576  | 0.946652028 | 0.967239513 | STAM       |
| ENSG00000274322 | 1.524157165 | 1.386017859 | 0.116691869  | 0.946753723 | 0.967300687 | AL136531.2 |
| ENSG00000107021 | 597.5994787 | 603.3752501 | -0.013744836 | 0.946786362 | 0.967300687 | TBC1D13    |
| ENSG00000160336 | 196.6267463 | 199.2775731 | -0.01975382  | 0.946920071 | 0.967399251 | ZNF761     |

|                 |             |             |              |             |             |            |
|-----------------|-------------|-------------|--------------|-------------|-------------|------------|
| ENSG00000271049 | 0.89358395  | 1.00940975  | -0.188752198 | 0.947182896 | 1           | AC020910.3 |
| ENSG00000227908 | 6.104150552 | 5.787212337 | 0.076945289  | 0.94730933  | 0.967758875 | AC016596.1 |
| ENSG00000092978 | 262.2835619 | 258.9837846 | 0.018741296  | 0.947448502 | 0.967862994 | GPATCH2    |
| ENSG00000267345 | 3.065936683 | 2.884149558 | 0.085767557  | 0.94770113  | 0.968063528 | AC010632.1 |
| ENSG00000232075 | 2.989107754 | 3.159256312 | -0.084394936 | 0.947719327 | 0.968063528 | MRPL35P2   |
| ENSG00000227017 | 1.17296339  | 1.029478846 | 0.182694134  | 0.94772452  | 1           | AC007036.1 |
| ENSG00000240733 | 1.17296339  | 1.029478846 | 0.182694134  | 0.94772452  | 1           | RN7SL502P  |
| ENSG00000168060 | 133.7986699 | 136.2388383 | -0.0266853   | 0.947837543 | 0.968146218 | NAALADL1   |
| ENSG00000228218 | 8.136706834 | 7.837869294 | 0.052759454  | 0.947936309 | 0.968192718 | ATF4P3     |
| ENSG00000185960 | 3.381885751 | 3.088436538 | 0.118986964  | 0.947957598 | 0.968192718 | SHOX       |
| ENSG00000227535 | 1.526664462 | 1.365948763 | 0.142080411  | 0.948089797 | 0.968289674 | AL357315.1 |
| ENSG00000231340 | 4.486795753 | 4.748276881 | -0.071212416 | 0.948213759 | 0.968369323 | ACTG1P10   |
| ENSG00000239382 | 50.58860417 | 49.75192125 | 0.026429113  | 0.948252551 | 0.968369323 | ALKBH6     |
| ENSG00000103148 | 811.8616035 | 804.9227464 | 0.012329839  | 0.9482994   | 0.968369323 | NPRL3      |
| ENSG00000198786 | 42931.10533 | 43550.34306 | -0.020659656 | 0.948316873 | 0.968369323 | MT-ND5     |
| ENSG00000235837 | 2.387511003 | 2.618499415 | -0.12035279  | 0.948375379 | 0.968391004 | AC073333.1 |
| ENSG00000172830 | 455.0054771 | 450.0738034 | 0.015584926  | 0.948506444 | 0.968486773 | SSH3       |
| ENSG00000112078 | 2286.736091 | 2247.612314 | 0.024757509  | 0.948745296 | 0.968684974 | KCTD20     |
| ENSG00000275131 | 464.7563792 | 455.5494821 | 0.029073023  | 0.948775125 | 0.968684974 | AC241952.1 |
| ENSG00000280543 | 3.01557692  | 3.210006989 | -0.0911456   | 0.948930145 | 0.968739598 | ASAP1-IT2  |
| ENSG00000124091 | 7.755282947 | 8.273400421 | -0.084380347 | 0.94895701  | 0.968739598 | GCNT7      |
| ENSG00000277270 | 9.41296832  | 9.711453227 | -0.045327217 | 0.948977587 | 0.968739598 | AL160412.1 |
| novel.493       | 3.067190332 | 2.873537073 | 0.090234433  | 0.948977773 | 0.968739598 | -          |
| ENSG00000125531 | 5.766889456 | 5.502648973 | 0.073468815  | 0.949071009 | 0.968785382 | FNDC11     |
| ENSG00000283267 | 2.361041837 | 2.567748738 | -0.107916976 | 0.949131133 | 0.968785382 | FAM237B    |
| ENSG00000224452 | 3.637303322 | 3.853421116 | -0.090043287 | 0.949134487 | 0.968785382 | RSL24D1P6  |
| ENSG00000240898 | 12.32023255 | 11.8908255  | 0.053525829  | 0.949341111 | 0.968958216 | AC132942.1 |
| ENSG00000269161 | 6.289078709 | 6.04340587  | 0.057301792  | 0.949571626 | 0.969155422 | AC010618.3 |
| ENSG00000272911 | 3.346569772 | 3.048298346 | 0.123223147  | 0.949624056 | 0.969170861 | AC005696.3 |
| ENSG00000171466 | 446.1445298 | 451.0989496 | -0.016017864 | 0.949720307 | 0.969203525 | ZNF562     |
| ENSG00000286064 | 6.301686468 | 6.633757569 | -0.078530511 | 0.94973067  | 0.969203525 | AL035413.2 |
| ENSG00000133114 | 499.7455625 | 495.0959758 | 0.013685315  | 0.949842931 | 0.969250474 | GPALPP1    |
| ENSG00000286918 | 4.875812803 | 4.605481459 | 0.076093214  | 0.949858854 | 0.969250474 | AL035411.3 |
| ENSG00000114978 | 2151.028461 | 2170.436617 | -0.012971013 | 0.949888594 | 0.969250474 | MOB1A      |
| ENSG00000227245 | 1.203193503 | 1.10029862  | 0.139010301  | 0.949957344 | 1           | AC092042.1 |
| ENSG00000166164 | 1115.553067 | 1124.039587 | -0.010988548 | 0.950059233 | 0.969386519 | BRD7       |
| ENSG00000247627 | 6.431453729 | 6.164976321 | 0.061257797  | 0.950196701 | 0.969475358 | MTND4P12   |
| ENSG00000231845 | 1.526664462 | 1.345879667 | 0.165961487  | 0.950247872 | 0.969475358 | HMGB3P14   |
| ENSG00000273424 | 3.254625787 | 3.455588036 | -0.091381681 | 0.950258245 | 0.969475358 | AL008582.1 |
| ENSG00000224577 | 4.285498891 | 4.055267952 | 0.084595106  | 0.9503362   | 0.969486904 | LINC01117  |
| ENSG00000140009 | 4.23263183  | 4.055267952 | 0.072405393  | 0.950344193 | 0.969486904 | ESR2       |
| ENSG00000067048 | 934.9116254 | 813.4877291 | 0.200646135  | 0.95039681  | 0.969502514 | DDX3Y      |
| ENSG00000271727 | 1.524157165 | 1.396630344 | 0.111162477  | 0.950660009 | 0.969673076 | AL357054.2 |
| ENSG00000276317 | 3.078544442 | 3.331577441 | -0.110972134 | 0.950675421 | 0.969673076 | AL357033.3 |
| ENSG00000137497 | 2989.051276 | 2954.404023 | 0.016922285  | 0.950675979 | 0.969673076 | NUMA1      |
| ENSG00000227666 | 4.499403511 | 4.269011542 | 0.074919117  | 0.950719575 | 0.969679475 | CYCSP24    |
| ENSG00000283268 | 1.200686205 | 1.10029862  | 0.136690238  | 0.950790984 | 1           | TEX54      |
| ENSG00000202000 | 0.921306765 | 1.029478846 | -0.175383342 | 0.950815638 | 1           | RNU1-36P   |
| ENSG00000266307 | 0.921306765 | 1.029478846 | -0.175383342 | 0.950815638 | 1           | MIR5093    |
| ENSG00000133069 | 116.659652  | 114.8320663 | 0.024849789  | 0.950940272 | 0.9698665   | TMCC2      |
| ENSG00000207003 | 2.34592678  | 2.618499415 | -0.148604747 | 0.950986126 | 0.969875193 | RNU6-611P  |

|                 |             |             |              |             |             |            |
|-----------------|-------------|-------------|--------------|-------------|-------------|------------|
| ENSG00000233308 | 1.510295757 | 1.386017859 | 0.107153649  | 0.951073494 | 0.969926223 | OSTN-AS1   |
| ENSG00000178171 | 1.200686205 | 1.069617038 | 0.166080618  | 0.951075572 | 1           | AMER3      |
| ENSG00000228360 | 1.230916317 | 1.130980201 | 0.135774385  | 0.951118708 | 1           | AC009220.1 |
| ENSG00000178038 | 69.6829218  | 68.15608974 | 0.031384882  | 0.951160277 | 0.969976652 | ALS2CL     |
| ENSG00000287089 | 2.743719372 | 2.944356846 | -0.096631343 | 0.951229244 | 0.970008909 | AL138889.3 |
| ENSG00000213412 | 1.84261353  | 2.038888596 | -0.156972428 | 0.951300046 | 0.970043035 | HNRNPA1P33 |
| ENSG00000277350 | 0.921306765 | 1.069617038 | -0.2189389   | 0.951491108 | 1           | AL353770.4 |
| ENSG00000199390 | 0.921306765 | 1.069617038 | -0.2189389   | 0.951491108 | 1           | SNORD114-7 |
| ENSG00000123240 | 2217.898094 | 2252.694915 | -0.0223119   | 0.951636352 | 0.970347883 | OPTN       |
| ENSG00000283409 | 0.61420451  | 0.693008929 | -0.189869582 | 0.951637636 | 1           | MIR3662    |
| ENSG00000223416 | 0.61420451  | 0.693008929 | -0.189869582 | 0.951637636 | 1           | RPS26P15   |
| ENSG00000278066 | 0.61420451  | 0.693008929 | -0.189869582 | 0.951637636 | 1           | AC023491.1 |
| ENSG00000261396 | 0.61420451  | 0.693008929 | -0.189869582 | 0.951637636 | 1           | AC027682.5 |
| ENSG00000279616 | 0.61420451  | 0.693008929 | -0.189869582 | 0.951637636 | 1           | AL096817.1 |
| ENSG00000267638 | 0.61420451  | 0.693008929 | -0.189869582 | 0.951637636 | 1           | AC023855.1 |
| ENSG00000263366 | 0.293240848 | 0.356539013 | -0.247412897 | 0.951651182 | 1           | ABHD17AP5  |
| ENSG00000256148 | 0.307102255 | 0.387220594 | -0.247412897 | 0.951651182 | 1           | AP000763.2 |
| ENSG00000287532 | 0.307102255 | 0.356539013 | -0.247412897 | 0.951651182 | 1           | AL353689.3 |
| ENSG00000232458 | 0.307102255 | 0.356539013 | -0.247412897 | 0.951651182 | 1           | LINC01450  |
| ENSG00000236153 | 0.293240848 | 0.336469917 | -0.247412897 | 0.951651182 | 1           | AC104076.1 |
| ENSG00000229869 | 0.293240848 | 0.387220594 | -0.247412897 | 0.951651182 | 1           | AL359878.2 |
| ENSG00000277246 | 0.307102255 | 0.356539013 | -0.247412897 | 0.951651182 | 1           | AL157762.1 |
| ENSG00000264301 | 0.293240848 | 0.356539013 | -0.247412897 | 0.951651182 | 1           | LINC01444  |
| ENSG00000171532 | 0.307102255 | 0.356539013 | -0.247412897 | 0.951651182 | 1           | NEUROD2    |
| ENSG00000279509 | 0.308355904 | 0.336469917 | -0.247412897 | 0.951651182 | 1           | AC007494.3 |
| ENSG00000225057 | 0.293240848 | 0.336469917 | -0.247412897 | 0.951651182 | 1           | AC012485.1 |
| ENSG00000226845 | 0.293240848 | 0.356539013 | -0.247412897 | 0.951651182 | 1           | EEF1GP3    |
| ENSG00000270522 | 0.307102255 | 0.336469917 | -0.247412897 | 0.951651182 | 1           | AL162713.1 |
| ENSG00000278513 | 0.293240848 | 0.336469917 | -0.247412897 | 0.951651182 | 1           | AC091046.2 |
| ENSG00000266497 | 0.293240848 | 0.356539013 | -0.247412897 | 0.951651182 | 1           | RDM1P2     |
| ENSG00000204174 | 0.308355904 | 0.336469917 | -0.247412897 | 0.951651182 | 1           | NPY4R      |
| ENSG00000253420 | 0.307102255 | 0.356539013 | -0.247412897 | 0.951651182 | 1           | AC103853.1 |
| ENSG00000233775 | 0.293240848 | 0.356539013 | -0.247412897 | 0.951651182 | 1           | AL109945.1 |
| ENSG00000143107 | 0.293240848 | 0.336469917 | -0.247412897 | 0.951651182 | 1           | FNDC7      |
| ENSG00000224299 | 0.307102255 | 0.356539013 | -0.247412897 | 0.951651182 | 1           | MTATP6P16  |
| ENSG00000253519 | 0.293240848 | 0.387220594 | -0.247412897 | 0.951651182 | 1           | AC106801.1 |
| ENSG00000223621 | 0.293240848 | 0.336469917 | -0.247412897 | 0.951651182 | 1           | AK4P4      |
| ENSG00000230911 | 0.293240848 | 0.356539013 | -0.247412897 | 0.951651182 | 1           | PPIHP1     |
| ENSG00000258323 | 0.307102255 | 0.336469917 | -0.247412897 | 0.951651182 | 1           | AC073575.1 |
| ENSG00000251939 | 0.307102255 | 0.336469917 | -0.247412897 | 0.951651182 | 1           | RNU6-1278P |
| ENSG00000239799 | 0.293240848 | 0.336469917 | -0.247412897 | 0.951651182 | 1           | ITIH4-AS1  |
| ENSG00000286035 | 0.293240848 | 0.356539013 | -0.247412897 | 0.951651182 | 1           | AC073840.1 |
| ENSG00000249664 | 0.293240848 | 0.336469917 | -0.247412897 | 0.951651182 | 1           | AC027338.1 |
| ENSG00000185056 | 0.308355904 | 0.336469917 | -0.247412897 | 0.951651182 | 1           | C5orf47    |
| ENSG00000217862 | 0.307102255 | 0.387220594 | -0.247412897 | 0.951651182 | 1           | HIST1H4PS1 |
| ENSG00000272719 | 0.293240848 | 0.356539013 | -0.247412897 | 0.951651182 | 1           | AC006483.2 |
| ENSG00000282915 | 0.293240848 | 0.336469917 | -0.247412897 | 0.951651182 | 1           | AC091769.2 |
| ENSG00000214511 | 0.293240848 | 0.387220594 | -0.247412897 | 0.951651182 | 1           | HIGD1C     |
| ENSG00000284584 | 0.293240848 | 0.336469917 | -0.247412897 | 0.951651182 | 1           | MIR5006    |
| ENSG00000252839 | 0.293240848 | 0.356539013 | -0.247412897 | 0.951651182 | 1           | RNU6-419P  |
| ENSG00000228807 | 0.307102255 | 0.356539013 | -0.247412897 | 0.951651182 | 1           | MRPS18CP6  |

|                 |             |             |              |             |   |            |
|-----------------|-------------|-------------|--------------|-------------|---|------------|
| ENSG00000155380 | 0.307102255 | 0.356539013 | -0.247412897 | 0.951651182 | 1 | SLC16A1    |
| ENSG00000227815 | 0.307102255 | 0.356539013 | -0.247412897 | 0.951651182 | 1 | AL359265.1 |
| ENSG00000280228 | 0.293240848 | 0.356539013 | -0.247412897 | 0.951651182 | 1 | AC079753.1 |
| ENSG00000235066 | 0.293240848 | 0.336469917 | -0.247412897 | 0.951651182 | 1 | AC009303.2 |
| ENSG00000179407 | 0.293240848 | 0.336469917 | -0.247412897 | 0.951651182 | 1 | DNAJB8     |
| ENSG00000239466 | 0.293240848 | 0.387220594 | -0.247412897 | 0.951651182 | 1 | RN7SL552P  |
| ENSG00000270751 | 0.293240848 | 0.336469917 | -0.247412897 | 0.951651182 | 1 | FBXW7-AS1  |
| ENSG00000277411 | 0.307102255 | 0.356539013 | -0.247412897 | 0.951651182 | 1 | RF00001    |
| ENSG00000264668 | 0.293240848 | 0.387220594 | -0.247412897 | 0.951651182 | 1 | AC138696.1 |
| ENSG00000285909 | 0.307102255 | 0.387220594 | -0.247412897 | 0.951651182 | 1 | AP002762.1 |
| ENSG00000258978 | 0.293240848 | 0.336469917 | -0.247412897 | 0.951651182 | 1 | HIF1AP1    |
| ENSG00000226948 | 0.307102255 | 0.336469917 | -0.247412897 | 0.951651182 | 1 | RPS4XP2    |
| ENSG00000278543 | 0.307102255 | 0.356539013 | -0.247412897 | 0.951651182 | 1 | AC010332.2 |
| ENSG00000236230 | 0.307102255 | 0.336469917 | -0.247412897 | 0.951651182 | 1 | AL356108.1 |
| ENSG00000229463 | 0.293240848 | 0.356539013 | -0.247412897 | 0.951651182 | 1 | LYST-AS1   |
| ENSG00000202434 | 0.293240848 | 0.356539013 | -0.247412897 | 0.951651182 | 1 | RF00394    |
| ENSG00000248399 | 0.293240848 | 0.336469917 | -0.247412897 | 0.951651182 | 1 | AL645924.1 |
| ENSG00000249988 | 0.308355904 | 0.336469917 | -0.247412897 | 0.951651182 | 1 | AC092546.1 |
| ENSG00000243859 | 0.307102255 | 0.336469917 | -0.247412897 | 0.951651182 | 1 | RPL5P17    |
| ENSG00000227836 | 0.307102255 | 0.356539013 | -0.247412897 | 0.951651182 | 1 | AC008850.1 |
| ENSG00000225093 | 0.293240848 | 0.387220594 | -0.247412897 | 0.951651182 | 1 | RPL3P7     |
| ENSG00000242562 | 0.293240848 | 0.336469917 | -0.247412897 | 0.951651182 | 1 | DCAF13P1   |
| ENSG00000226679 | 0.293240848 | 0.356539013 | -0.247412897 | 0.951651182 | 1 | AL606748.1 |
| ENSG00000252755 | 0.293240848 | 0.387220594 | -0.247412897 | 0.951651182 | 1 | RNU6-703P  |
| ENSG00000254791 | 0.293240848 | 0.387220594 | -0.247412897 | 0.951651182 | 1 | FAR1-IT1   |
| ENSG00000255741 | 0.307102255 | 0.356539013 | -0.247412897 | 0.951651182 | 1 | AP000808.2 |
| ENSG00000256596 | 0.307102255 | 0.356539013 | -0.247412897 | 0.951651182 | 1 | AC026358.1 |
| ENSG00000228501 | 0.308355904 | 0.336469917 | -0.247412897 | 0.951651182 | 1 | RPL15P18   |
| ENSG00000219027 | 0.293240848 | 0.387220594 | -0.247412897 | 0.951651182 | 1 | RPS3AP2    |
| ENSG00000197665 | 0.307102255 | 0.387220594 | -0.247412897 | 0.951651182 | 1 | AC007952.1 |
| ENSG00000225357 | 0.293240848 | 0.387220594 | -0.247412897 | 0.951651182 | 1 | RPF2P1     |
| ENSG00000207696 | 0.293240848 | 0.356539013 | -0.247412897 | 0.951651182 | 1 | MIR659     |
| ENSG00000281112 | 0.293240848 | 0.336469917 | -0.247412897 | 0.951651182 | 1 | AL355480.2 |
| ENSG00000264207 | 0.308355904 | 0.336469917 | -0.247412897 | 0.951651182 | 1 | AC239868.1 |
| ENSG00000282317 | 0.293240848 | 0.336469917 | -0.247412897 | 0.951651182 | 1 | AL451007.2 |
| ENSG00000228955 | 0.293240848 | 0.336469917 | -0.247412897 | 0.951651182 | 1 | AL591623.2 |
| ENSG00000187536 | 0.293240848 | 0.356539013 | -0.247412897 | 0.951651182 | 1 | TPM3P7     |
| ENSG00000279070 | 0.293240848 | 0.336469917 | -0.247412897 | 0.951651182 | 1 | AC073263.2 |
| ENSG00000228551 | 0.293240848 | 0.356539013 | -0.247412897 | 0.951651182 | 1 | SNRPGP9    |
| ENSG00000213055 | 0.307102255 | 0.356539013 | -0.247412897 | 0.951651182 | 1 | EEF1B2P7   |
| ENSG00000234235 | 0.293240848 | 0.336469917 | -0.247412897 | 0.951651182 | 1 | BOK-AS1    |
| ENSG00000207109 | 0.307102255 | 0.387220594 | -0.247412897 | 0.951651182 | 1 | SNORD38C   |
| ENSG00000250174 | 0.293240848 | 0.356539013 | -0.247412897 | 0.951651182 | 1 | MYLK-AS2   |
| ENSG00000207368 | 0.293240848 | 0.356539013 | -0.247412897 | 0.951651182 | 1 | RF00019    |
| ENSG00000251679 | 0.293240848 | 0.336469917 | -0.247412897 | 0.951651182 | 1 | AC073848.1 |
| ENSG00000213864 | 0.308355904 | 0.336469917 | -0.247412897 | 0.951651182 | 1 | EEF1B2P2   |
| ENSG00000206715 | 0.293240848 | 0.336469917 | -0.247412897 | 0.951651182 | 1 | RNU6-444P  |
| ENSG00000226522 | 0.293240848 | 0.387220594 | -0.247412897 | 0.951651182 | 1 | AC004994.1 |
| ENSG00000279336 | 0.308355904 | 0.336469917 | -0.247412897 | 0.951651182 | 1 | AL353662.3 |
| ENSG00000255094 | 0.307102255 | 0.356539013 | -0.247412897 | 0.951651182 | 1 | AC090159.1 |
| ENSG00000279353 | 0.293240848 | 0.387220594 | -0.247412897 | 0.951651182 | 1 | AP001324.3 |

|                 |             |             |              |             |   |            |
|-----------------|-------------|-------------|--------------|-------------|---|------------|
| ENSG00000196946 | 0.308355904 | 0.336469917 | -0.247412897 | 0.951651182 | 1 | ZNF705A    |
| ENSG00000287030 | 0.293240848 | 0.387220594 | -0.247412897 | 0.951651182 | 1 | AC107032.3 |
| ENSG00000275014 | 0.307102255 | 0.336469917 | -0.247412897 | 0.951651182 | 1 | RN7SL166P  |
| ENSG00000225133 | 0.293240848 | 0.387220594 | -0.247412897 | 0.951651182 | 1 | MORF4L1P4  |
| ENSG00000236534 | 0.293240848 | 0.356539013 | -0.247412897 | 0.951651182 | 1 | H3F3BP1    |
| ENSG00000259052 | 0.307102255 | 0.387220594 | -0.247412897 | 0.951651182 | 1 | AL157871.6 |
| ENSG00000243568 | 0.307102255 | 0.356539013 | -0.247412897 | 0.951651182 | 1 | AC020779.1 |
| ENSG00000174990 | 0.308355904 | 0.336469917 | -0.247412897 | 0.951651182 | 1 | CA5A       |
| ENSG00000170175 | 0.307102255 | 0.336469917 | -0.247412897 | 0.951651182 | 1 | CHRNA1     |
| ENSG00000262492 | 0.293240848 | 0.356539013 | -0.247412897 | 0.951651182 | 1 | AC104581.1 |
| ENSG00000260777 | 0.308355904 | 0.336469917 | -0.247412897 | 0.951651182 | 1 | AC061975.1 |
| ENSG00000277258 | 0.293240848 | 0.356539013 | -0.247412897 | 0.951651182 | 1 | PCGF2      |
| ENSG00000200394 | 0.293240848 | 0.336469917 | -0.247412897 | 0.951651182 | 1 | SNORA38B   |
| ENSG00000266743 | 0.293240848 | 0.387220594 | -0.247412897 | 0.951651182 | 1 | AC103808.6 |
| ENSG00000213979 | 0.308355904 | 0.336469917 | -0.247412897 | 0.951651182 | 1 | RPL7AP14   |
| ENSG00000267159 | 0.307102255 | 0.356539013 | -0.247412897 | 0.951651182 | 1 | AC005379.1 |
| ENSG00000265390 | 0.293240848 | 0.356539013 | -0.247412897 | 0.951651182 | 1 | MIR4999    |
| ENSG00000239435 | 0.293240848 | 0.387220594 | -0.247412897 | 0.951651182 | 1 | KCNMB3P1   |
| ENSG00000236876 | 0.307102255 | 0.387220594 | -0.247412897 | 0.951651182 | 1 | TMSB4XP1   |
| ENSG00000213735 | 0.307102255 | 0.336469917 | -0.247412897 | 0.951651182 | 1 | ANAPC10P1  |
| ENSG00000287224 | 0.307102255 | 0.336469917 | -0.247412897 | 0.951651182 | 1 | AC099791.4 |
| ENSG00000286019 | 0.308355904 | 0.336469917 | -0.247412897 | 0.951651182 | 1 | AC239811.1 |
| ENSG00000186487 | 0.307102255 | 0.387220594 | -0.247412897 | 0.951651182 | 1 | MYT1L      |
| ENSG00000206815 | 0.307102255 | 0.356539013 | -0.247412897 | 0.951651182 | 1 | RNU6-483P  |
| ENSG00000242290 | 0.293240848 | 0.387220594 | -0.247412897 | 0.951651182 | 1 | ZBTB20-AS5 |
| ENSG00000286856 | 0.308355904 | 0.336469917 | -0.247412897 | 0.951651182 | 1 | AC061708.1 |
| ENSG00000250137 | 0.308355904 | 0.336469917 | -0.247412897 | 0.951651182 | 1 | AC093607.1 |
| ENSG00000240775 | 0.307102255 | 0.356539013 | -0.247412897 | 0.951651182 | 1 | AC021205.1 |
| ENSG00000197410 | 0.308355904 | 0.336469917 | -0.247412897 | 0.951651182 | 1 | DCHS2      |
| ENSG00000204301 | 0.307102255 | 0.356539013 | -0.247412897 | 0.951651182 | 1 | NOTCH4     |
| ENSG00000285844 | 0.307102255 | 0.336469917 | -0.247412897 | 0.951651182 | 1 | FO393414.3 |
| ENSG00000231840 | 0.307102255 | 0.336469917 | -0.247412897 | 0.951651182 | 1 | AC073342.1 |
| ENSG00000184210 | 0.307102255 | 0.387220594 | -0.247412897 | 0.951651182 | 1 | DGAT2L6    |
| ENSG00000101890 | 0.307102255 | 0.387220594 | -0.247412897 | 0.951651182 | 1 | GUCY2F     |
| ENSG00000240905 | 0.293240848 | 0.356539013 | -0.247412897 | 0.951651182 | 1 | RN7SL798P  |
| ENSG00000181097 | 0.307102255 | 0.387220594 | -0.247412897 | 0.951651182 | 1 | AC105219.1 |
| ENSG00000224825 | 0.307102255 | 0.336469917 | -0.247412897 | 0.951651182 | 1 | RORB-AS1   |
| ENSG00000277713 | 0.293240848 | 0.356539013 | -0.247412897 | 0.951651182 | 1 | MIR6856    |
| ENSG00000274841 | 0.293240848 | 0.387220594 | -0.247412897 | 0.951651182 | 1 | RF00017    |
| ENSG00000255276 | 0.307102255 | 0.336469917 | -0.247412897 | 0.951651182 | 1 | RRM1-AS1   |
| ENSG00000257443 | 0.293240848 | 0.356539013 | -0.247412897 | 0.951651182 | 1 | AC068305.2 |
| ENSG00000235957 | 0.307102255 | 0.387220594 | -0.247412897 | 0.951651182 | 1 | COX7CP1    |
| ENSG00000223572 | 0.307102255 | 0.336469917 | -0.247412897 | 0.951651182 | 1 | CKMT1A     |
| ENSG00000259203 | 0.293240848 | 0.356539013 | -0.247412897 | 0.951651182 | 1 | AC016044.1 |
| ENSG00000258895 | 0.307102255 | 0.356539013 | -0.247412897 | 0.951651182 | 1 | AC104390.1 |
| ENSG00000281856 | 0.307102255 | 0.356539013 | -0.247412897 | 0.951651182 | 1 | AC106017.2 |
| ENSG00000267301 | 0.308355904 | 0.336469917 | -0.247412897 | 0.951651182 | 1 | RPL23AP77  |
| ENSG00000179253 | 0.293240848 | 0.356539013 | -0.247412897 | 0.951651182 | 1 | AL162457.1 |
| ENSG00000267703 | 0.293240848 | 0.387220594 | -0.247412897 | 0.951651182 | 1 | AC020917.2 |
| ENSG00000199695 | 0.293240848 | 0.356539013 | -0.247412897 | 0.951651182 | 1 | RNU6-1128P |
| ENSG00000232687 | 0.293240848 | 0.356539013 | -0.247412897 | 0.951651182 | 1 | RPL12P9    |



|                 |             |             |              |             |   |            |
|-----------------|-------------|-------------|--------------|-------------|---|------------|
| ENSG00000235701 | 0.307102255 | 0.356539013 | -0.247412897 | 0.951651182 | 1 | PCBP2P1    |
| ENSG00000233653 | 0.307102255 | 0.387220594 | -0.247412897 | 0.951651182 | 1 | CICP7      |
| ENSG00000188800 | 0.293240848 | 0.336469917 | -0.247412897 | 0.951651182 | 1 | TMCO2      |
| ENSG00000234093 | 0.307102255 | 0.387220594 | -0.247412897 | 0.951651182 | 1 | RPS15AP11  |
| ENSG00000234315 | 0.307102255 | 0.356539013 | -0.247412897 | 0.951651182 | 1 | OSTCP5     |
| ENSG00000233401 | 0.307102255 | 0.356539013 | -0.247412897 | 0.951651182 | 1 | PRKAR1AP1  |
| ENSG00000234332 | 0.308355904 | 0.336469917 | -0.247412897 | 0.951651182 | 1 | BCAS2P2    |
| ENSG00000249798 | 0.293240848 | 0.387220594 | -0.247412897 | 0.951651182 | 1 | HSD3BP3    |
| ENSG00000259788 | 0.293240848 | 0.336469917 | -0.247412897 | 0.951651182 | 1 | AL596325.1 |
| ENSG00000232751 | 0.293240848 | 0.387220594 | -0.247412897 | 0.951651182 | 1 | AL645568.3 |
| ENSG00000252552 | 0.293240848 | 0.387220594 | -0.247412897 | 0.951651182 | 1 | RNU6-307P  |
| ENSG00000235060 | 0.308355904 | 0.336469917 | -0.247412897 | 0.951651182 | 1 | VDAC1P4    |
| ENSG00000287284 | 0.293240848 | 0.387220594 | -0.247412897 | 0.951651182 | 1 | AC130814.1 |
| ENSG00000270723 | 0.293240848 | 0.387220594 | -0.247412897 | 0.951651182 | 1 | RPL23AP92  |
| ENSG00000227653 | 0.307102255 | 0.356539013 | -0.247412897 | 0.951651182 | 1 | ISCA1P6    |
| ENSG00000207270 | 0.293240848 | 0.336469917 | -0.247412897 | 0.951651182 | 1 | RNU6-601P  |
| ENSG00000284180 | 0.308355904 | 0.336469917 | -0.247412897 | 0.951651182 | 1 | MIR3606    |
| ENSG00000201813 | 0.293240848 | 0.356539013 | -0.247412897 | 0.951651182 | 1 | RNU6-915P  |
| ENSG00000234073 | 0.293240848 | 0.356539013 | -0.247412897 | 0.951651182 | 1 | AC011816.1 |
| ENSG00000282527 | 0.308355904 | 0.336469917 | -0.247412897 | 0.951651182 | 1 | AC110491.3 |
| ENSG00000240766 | 0.293240848 | 0.356539013 | -0.247412897 | 0.951651182 | 1 | PLCXD2-AS1 |
| ENSG00000249020 | 0.293240848 | 0.356539013 | -0.247412897 | 0.951651182 | 1 | SNORA58    |
| ENSG00000272359 | 0.308355904 | 0.336469917 | -0.247412897 | 0.951651182 | 1 | RNU4-89P   |
| ENSG00000207293 | 0.293240848 | 0.356539013 | -0.247412897 | 0.951651182 | 1 | RF00019    |
| ENSG00000244630 | 0.293240848 | 0.356539013 | -0.247412897 | 0.951651182 | 1 | AC022493.1 |
| ENSG00000250444 | 0.293240848 | 0.387220594 | -0.247412897 | 0.951651182 | 1 | CCT5P1     |
| ENSG00000196900 | 0.307102255 | 0.336469917 | -0.247412897 | 0.951651182 | 1 | TEX43      |
| ENSG00000287002 | 0.293240848 | 0.356539013 | -0.247412897 | 0.951651182 | 1 | AL589644.1 |
| ENSG00000217414 | 0.308355904 | 0.336469917 | -0.247412897 | 0.951651182 | 1 | DDX18P3    |
| ENSG00000204304 | 0.307102255 | 0.356539013 | -0.247412897 | 0.951651182 | 1 | PBX2       |
| ENSG00000216636 | 0.293240848 | 0.336469917 | -0.247412897 | 0.951651182 | 1 | RPL7P25    |
| ENSG00000226068 | 0.293240848 | 0.387220594 | -0.247412897 | 0.951651182 | 1 | HNRNPA3P4  |
| ENSG00000264056 | 0.293240848 | 0.336469917 | -0.247412897 | 0.951651182 | 1 | MIR5685    |
| ENSG00000164411 | 0.293240848 | 0.356539013 | -0.247412897 | 0.951651182 | 1 | GJB7       |
| ENSG00000218793 | 0.307102255 | 0.336469917 | -0.247412897 | 0.951651182 | 1 | AL049697.3 |
| ENSG00000216977 | 0.293240848 | 0.387220594 | -0.247412897 | 0.951651182 | 1 | RPL21P65   |
| ENSG00000231120 | 0.307102255 | 0.387220594 | -0.247412897 | 0.951651182 | 1 | BTF3P10    |
| ENSG00000270487 | 0.293240848 | 0.387220594 | -0.247412897 | 0.951651182 | 1 | AL355297.2 |
| ENSG00000235955 | 0.293240848 | 0.336469917 | -0.247412897 | 0.951651182 | 1 | CICP20     |
| ENSG00000276592 | 0.307102255 | 0.336469917 | -0.247412897 | 0.951651182 | 1 | PHBP6      |
| ENSG00000231087 | 0.293240848 | 0.387220594 | -0.247412897 | 0.951651182 | 1 | FDPSP7     |
| ENSG00000287519 | 0.293240848 | 0.387220594 | -0.247412897 | 0.951651182 | 1 | AC004921.2 |
| ENSG00000222024 | 0.293240848 | 0.387220594 | -0.247412897 | 0.951651182 | 1 | AC004945.1 |
| ENSG00000280004 | 0.293240848 | 0.387220594 | -0.247412897 | 0.951651182 | 1 | AC005086.3 |
| ENSG00000240579 | 0.293240848 | 0.387220594 | -0.247412897 | 0.951651182 | 1 | AC006529.1 |
| ENSG00000214102 | 0.293240848 | 0.336469917 | -0.247412897 | 0.951651182 | 1 | WEE2       |
| ENSG00000237254 | 0.308355904 | 0.336469917 | -0.247412897 | 0.951651182 | 1 | TRBV30     |
| ENSG00000259977 | 0.293240848 | 0.356539013 | -0.247412897 | 0.951651182 | 1 | AL121578.3 |
| ENSG00000233254 | 0.307102255 | 0.387220594 | -0.247412897 | 0.951651182 | 1 | RPL21P134  |
| ENSG00000213684 | 0.307102255 | 0.336469917 | -0.247412897 | 0.951651182 | 1 | LDHBP2     |
| ENSG00000170935 | 0.307102255 | 0.356539013 | -0.247412897 | 0.951651182 | 1 | NCBP2L     |

|                 |             |             |              |             |   |             |
|-----------------|-------------|-------------|--------------|-------------|---|-------------|
| ENSG00000234176 | 0.293240848 | 0.336469917 | -0.247412897 | 0.951651182 | 1 | HSPA8P1     |
| ENSG00000253697 | 0.307102255 | 0.336469917 | -0.247412897 | 0.951651182 | 1 | AC103834.1  |
| ENSG00000253891 | 0.293240848 | 0.387220594 | -0.247412897 | 0.951651182 | 1 | AC023202.1  |
| ENSG00000252637 | 0.307102255 | 0.356539013 | -0.247412897 | 0.951651182 | 1 | RNA5SP268   |
| ENSG00000251521 | 0.307102255 | 0.336469917 | -0.247412897 | 0.951651182 | 1 | IMPA1P1     |
| ENSG00000254021 | 0.308355904 | 0.336469917 | -0.247412897 | 0.951651182 | 1 | AC027031.1  |
| ENSG00000227170 | 0.293240848 | 0.356539013 | -0.247412897 | 0.951651182 | 1 | AF178030.1  |
| ENSG00000253574 | 0.293240848 | 0.336469917 | -0.247412897 | 0.951651182 | 1 | AC021744.1  |
| ENSG00000236724 | 0.293240848 | 0.356539013 | -0.247412897 | 0.951651182 | 1 | AL137071.1  |
| ENSG00000236921 | 0.308355904 | 0.336469917 | -0.247412897 | 0.951651182 | 1 | AL157937.1  |
| ENSG00000221269 | 0.293240848 | 0.387220594 | -0.247412897 | 0.951651182 | 1 | MIR1302-8   |
| ENSG00000277465 | 0.307102255 | 0.356539013 | -0.247412897 | 0.951651182 | 1 | AL137067.1  |
| ENSG00000263897 | 0.308355904 | 0.336469917 | -0.247412897 | 0.951651182 | 1 | MIR4669     |
| ENSG00000203258 | 0.307102255 | 0.356539013 | -0.247412897 | 0.951651182 | 1 | AC013549.1  |
| ENSG00000254670 | 0.293240848 | 0.356539013 | -0.247412897 | 0.951651182 | 1 | AC084859.1  |
| ENSG00000182255 | 0.307102255 | 0.387220594 | -0.247412897 | 0.951651182 | 1 | KCNA4       |
| ENSG00000255446 | 0.293240848 | 0.387220594 | -0.247412897 | 0.951651182 | 1 | AP003064.2  |
| ENSG00000255350 | 0.293240848 | 0.356539013 | -0.247412897 | 0.951651182 | 1 | MTCO1P15    |
| ENSG00000206847 | 0.293240848 | 0.336469917 | -0.247412897 | 0.951651182 | 1 | RF00019     |
| ENSG00000276662 | 0.307102255 | 0.387220594 | -0.247412897 | 0.951651182 | 1 | AL713922.2  |
| ENSG00000234167 | 0.307102255 | 0.356539013 | -0.247412897 | 0.951651182 | 1 | ELOBP4      |
| ENSG00000236900 | 0.293240848 | 0.356539013 | -0.247412897 | 0.951651182 | 1 | TIMM9P1     |
| ENSG00000206756 | 0.307102255 | 0.336469917 | -0.247412897 | 0.951651182 | 1 | RF00019     |
| ENSG00000236217 | 0.307102255 | 0.356539013 | -0.247412897 | 0.951651182 | 1 | C1DP2       |
| ENSG00000207551 | 0.293240848 | 0.356539013 | -0.247412897 | 0.951651182 | 1 | MIR608      |
| ENSG00000197893 | 0.293240848 | 0.356539013 | -0.247412897 | 0.951651182 | 1 | NRAP        |
| ENSG00000242818 | 0.307102255 | 0.387220594 | -0.247412897 | 0.951651182 | 1 | RN7SL846P   |
| ENSG00000221439 | 0.307102255 | 0.387220594 | -0.247412897 | 0.951651182 | 1 | RNU4ATAC16P |
| ENSG00000221611 | 0.307102255 | 0.356539013 | -0.247412897 | 0.951651182 | 1 | RF00604     |
| ENSG00000256134 | 0.307102255 | 0.356539013 | -0.247412897 | 0.951651182 | 1 | EGLN3P1     |
| ENSG00000258016 | 0.308355904 | 0.336469917 | -0.247412897 | 0.951651182 | 1 | HIGD1AP1    |
| ENSG00000257808 | 0.293240848 | 0.336469917 | -0.247412897 | 0.951651182 | 1 | AC073573.1  |
| ENSG00000276272 | 0.307102255 | 0.356539013 | -0.247412897 | 0.951651182 | 1 | AC024884.2  |
| ENSG00000258679 | 0.307102255 | 0.356539013 | -0.247412897 | 0.951651182 | 1 | AC121758.1  |
| ENSG00000256293 | 0.307102255 | 0.387220594 | -0.247412897 | 0.951651182 | 1 | AC135279.2  |
| ENSG00000111536 | 0.308355904 | 0.336469917 | -0.247412897 | 0.951651182 | 1 | IL26        |
| ENSG00000258343 | 0.307102255 | 0.336469917 | -0.247412897 | 0.951651182 | 1 | AC090001.1  |
| ENSG00000258285 | 0.293240848 | 0.356539013 | -0.247412897 | 0.951651182 | 1 | TESC-AS1    |
| ENSG00000286586 | 0.307102255 | 0.356539013 | -0.247412897 | 0.951651182 | 1 | AC084018.3  |
| ENSG00000249267 | 0.293240848 | 0.336469917 | -0.247412897 | 0.951651182 | 1 | LINC00939   |
| ENSG00000251299 | 0.308355904 | 0.336469917 | -0.247412897 | 0.951651182 | 1 | SLC25A15P3  |
| ENSG00000287599 | 0.307102255 | 0.356539013 | -0.247412897 | 0.951651182 | 1 | AL157813.2  |
| ENSG00000218502 | 0.293240848 | 0.356539013 | -0.247412897 | 0.951651182 | 1 | H2AFZP3     |
| ENSG00000274331 | 0.307102255 | 0.387220594 | -0.247412897 | 0.951651182 | 1 | AL355974.1  |
| ENSG00000264741 | 0.293240848 | 0.356539013 | -0.247412897 | 0.951651182 | 1 | MIR4505     |
| ENSG00000221303 | 0.293240848 | 0.336469917 | -0.247412897 | 0.951651182 | 1 | SNORA79     |
| ENSG00000286607 | 0.307102255 | 0.387220594 | -0.247412897 | 0.951651182 | 1 | AL135818.3  |
| ENSG00000286636 | 0.307102255 | 0.387220594 | -0.247412897 | 0.951651182 | 1 | AL512356.4  |
| ENSG00000199512 | 0.293240848 | 0.336469917 | -0.247412897 | 0.951651182 | 1 | RNU6-212P   |
| ENSG00000259316 | 0.307102255 | 0.387220594 | -0.247412897 | 0.951651182 | 1 | AC087632.1  |
| ENSG00000260152 | 0.293240848 | 0.336469917 | -0.247412897 | 0.951651182 | 1 | AC113208.1  |

|                 |             |             |              |             |   |             |
|-----------------|-------------|-------------|--------------|-------------|---|-------------|
| ENSG00000259609 | 0.308355904 | 0.336469917 | -0.247412897 | 0.951651182 | 1 | AC027807.1  |
| ENSG00000287191 | 0.293240848 | 0.336469917 | -0.247412897 | 0.951651182 | 1 | AC055807.1  |
| ENSG00000277010 | 0.308355904 | 0.336469917 | -0.247412897 | 0.951651182 | 1 | AC120498.10 |
| ENSG00000265867 | 0.293240848 | 0.336469917 | -0.247412897 | 0.951651182 | 1 | MIR4516     |
| ENSG00000103310 | 0.307102255 | 0.336469917 | -0.247412897 | 0.951651182 | 1 | ZP2         |
| ENSG00000214617 | 0.293240848 | 0.356539013 | -0.247412897 | 0.951651182 | 1 | SLC6A10P    |
| ENSG00000261599 | 0.293240848 | 0.387220594 | -0.247412897 | 0.951651182 | 1 | HERC2P8     |
| ENSG00000221514 | 0.293240848 | 0.356539013 | -0.247412897 | 0.951651182 | 1 | SNORD111B   |
| ENSG00000223224 | 0.293240848 | 0.336469917 | -0.247412897 | 0.951651182 | 1 | SNORD71     |
| ENSG00000260969 | 0.293240848 | 0.387220594 | -0.247412897 | 0.951651182 | 1 | WVOX-AS1    |
| ENSG00000261410 | 0.293240848 | 0.387220594 | -0.247412897 | 0.951651182 | 1 | AC009142.1  |
| ENSG00000264113 | 0.293240848 | 0.356539013 | -0.247412897 | 0.951651182 | 1 | RN7SL784P   |
| ENSG00000266853 | 0.293240848 | 0.356539013 | -0.247412897 | 0.951651182 | 1 | ITM2BP1     |
| ENSG00000201178 | 0.293240848 | 0.387220594 | -0.247412897 | 0.951651182 | 1 | RF00019     |
| ENSG00000277161 | 0.307102255 | 0.356539013 | -0.247412897 | 0.951651182 | 1 | PIGW        |
| ENSG00000271919 | 0.307102255 | 0.387220594 | -0.247412897 | 0.951651182 | 1 | AC005828.7  |
| ENSG00000263644 | 0.293240848 | 0.356539013 | -0.247412897 | 0.951651182 | 1 | AC005828.3  |
| ENSG00000200257 | 0.307102255 | 0.387220594 | -0.247412897 | 0.951651182 | 1 | RNU6-97P    |
| ENSG00000264186 | 0.307102255 | 0.356539013 | -0.247412897 | 0.951651182 | 1 | SNRPCP4     |
| ENSG00000265316 | 0.293240848 | 0.356539013 | -0.247412897 | 0.951651182 | 1 | AP005059.2  |
| ENSG00000263382 | 0.293240848 | 0.356539013 | -0.247412897 | 0.951651182 | 1 | AC018371.1  |
| ENSG00000267140 | 0.307102255 | 0.387220594 | -0.247412897 | 0.951651182 | 1 | AC007998.2  |
| ENSG00000278983 | 0.308355904 | 0.336469917 | -0.247412897 | 0.951651182 | 1 | AC048380.2  |
| ENSG00000233293 | 0.308355904 | 0.336469917 | -0.247412897 | 0.951651182 | 1 | AL133343.2  |
| ENSG00000266990 | 0.293240848 | 0.387220594 | -0.247412897 | 0.951651182 | 1 | AC004528.1  |
| ENSG00000105679 | 0.293240848 | 0.336469917 | -0.247412897 | 0.951651182 | 1 | GAPDHS      |
| ENSG00000225877 | 0.293240848 | 0.387220594 | -0.247412897 | 0.951651182 | 1 | PSG8-AS1    |
| ENSG00000237452 | 0.308355904 | 0.336469917 | -0.247412897 | 0.951651182 | 1 | BHMG1       |
| ENSG00000211580 | 0.307102255 | 0.356539013 | -0.247412897 | 0.951651182 | 1 | MIR769      |
| ENSG00000269014 | 0.293240848 | 0.356539013 | -0.247412897 | 0.951651182 | 1 | AC008622.1  |
| ENSG00000170892 | 0.307102255 | 0.356539013 | -0.247412897 | 0.951651182 | 1 | TSEN34      |
| ENSG00000236754 | 0.307102255 | 0.336469917 | -0.247412897 | 0.951651182 | 1 | AC007666.1  |
| ENSG00000280025 | 0.307102255 | 0.387220594 | -0.247412897 | 0.951651182 | 1 | AL008638.6  |
| ENSG00000225676 | 0.307102255 | 0.356539013 | -0.247412897 | 0.951651182 | 1 | AC002378.1  |
| ENSG00000286594 | 0.293240848 | 0.336469917 | -0.247412897 | 0.951651182 | 1 | AL133493.2  |
| ENSG00000174576 | 0.308355904 | 0.356539013 | -0.247412897 | 0.951651182 | 1 | NPAS4       |
| ENSG00000236276 | 0.308355904 | 0.387220594 | -0.247412897 | 0.951651182 | 1 | NDP-AS1     |
| ENSG00000277572 | 0.308355904 | 0.356539013 | -0.247412897 | 0.951651182 | 1 | RF01518     |
| ENSG00000147655 | 0.308355904 | 0.356539013 | -0.247412897 | 0.951651182 | 1 | RSPO2       |
| ENSG00000251596 | 0.308355904 | 0.356539013 | -0.247412897 | 0.951651182 | 1 | HADHAP1     |
| ENSG00000252410 | 0.308355904 | 0.387220594 | -0.247412897 | 0.951651182 | 1 | RNU5B-3P    |
| ENSG00000234469 | 0.308355904 | 0.387220594 | -0.247412897 | 0.951651182 | 1 | CLDN34      |
| ENSG00000287945 | 0.308355904 | 0.356539013 | -0.247412897 | 0.951651182 | 1 | AL603824.1  |
| ENSG00000265844 | 0.308355904 | 0.356539013 | -0.247412897 | 0.951651182 | 1 | AC100863.1  |
| ENSG00000283683 | 0.308355904 | 0.387220594 | -0.247412897 | 0.951651182 | 1 | MYOCOS      |
| ENSG00000144119 | 0.308355904 | 0.356539013 | -0.247412897 | 0.951651182 | 1 | C1QL2       |
| ENSG00000272954 | 0.308355904 | 0.356539013 | -0.247412897 | 0.951651182 | 1 | AP000553.2  |
| ENSG00000270190 | 0.308355904 | 0.356539013 | -0.247412897 | 0.951651182 | 1 | AC068491.3  |
| ENSG00000286531 | 0.308355904 | 0.356539013 | -0.247412897 | 0.951651182 | 1 | AC097015.1  |
| ENSG00000203756 | 0.308355904 | 0.387220594 | -0.247412897 | 0.951651182 | 1 | TMEM244     |
| ENSG00000256442 | 0.308355904 | 0.356539013 | -0.247412897 | 0.951651182 | 1 | AC010186.1  |

|                 |             |             |              |             |   |            |
|-----------------|-------------|-------------|--------------|-------------|---|------------|
| ENSG00000258090 | 0.308355904 | 0.387220594 | -0.247412897 | 0.951651182 | 1 | AC093014.1 |
| ENSG00000260420 | 0.308355904 | 0.356539013 | -0.247412897 | 0.951651182 | 1 | LINC02182  |
| ENSG00000223715 | 0.308355904 | 0.387220594 | -0.247412897 | 0.951651182 | 1 | LINC01208  |
| ENSG00000228368 | 0.308355904 | 0.387220594 | -0.247412897 | 0.951651182 | 1 | AC106873.1 |
| ENSG00000261697 | 0.308355904 | 0.356539013 | -0.247412897 | 0.951651182 | 1 | AC010531.4 |
| ENSG00000227278 | 0.308355904 | 0.387220594 | -0.247412897 | 0.951651182 | 1 | AL603839.1 |
| ENSG00000249948 | 0.308355904 | 0.356539013 | -0.247412897 | 0.951651182 | 1 | GBA3       |
| ENSG00000133136 | 0.308355904 | 0.387220594 | -0.247412897 | 0.951651182 | 1 | GN5P2      |
| ENSG00000280169 | 0.308355904 | 0.356539013 | -0.247412897 | 0.951651182 | 1 | AL136526.1 |
| ENSG00000238166 | 0.308355904 | 0.387220594 | -0.247412897 | 0.951651182 | 1 | AC022748.1 |
| ENSG00000196979 | 0.308355904 | 0.356539013 | -0.247412897 | 0.951651182 | 1 | GPRACR     |
| ENSG00000186897 | 0.308355904 | 0.356539013 | -0.247412897 | 0.951651182 | 1 | C1QL4      |
| ENSG00000259238 | 0.308355904 | 0.356539013 | -0.247412897 | 0.951651182 | 1 | AC092755.2 |
| ENSG00000259591 | 0.308355904 | 0.356539013 | -0.247412897 | 0.951651182 | 1 | AC022898.1 |
| ENSG00000279040 | 0.308355904 | 0.387220594 | -0.247412897 | 0.951651182 | 1 | AC090617.6 |
| ENSG00000229400 | 0.308355904 | 0.387220594 | -0.247412897 | 0.951651182 | 1 | AL596330.1 |
| ENSG00000227339 | 0.308355904 | 0.356539013 | -0.247412897 | 0.951651182 | 1 | THRAP3P1   |
| ENSG00000286256 | 0.308355904 | 0.356539013 | -0.247412897 | 0.951651182 | 1 | AC084871.3 |
| ENSG00000253315 | 0.308355904 | 0.356539013 | -0.247412897 | 0.951651182 | 1 | LINC01932  |
| ENSG00000183072 | 0.308355904 | 0.356539013 | -0.247412897 | 0.951651182 | 1 | NKX2-5     |
| ENSG00000243896 | 0.308355904 | 0.387220594 | -0.247412897 | 0.951651182 | 1 | OR2A7      |
| ENSG00000222635 | 0.308355904 | 0.387220594 | -0.247412897 | 0.951651182 | 1 | RNU6-1203P |
| ENSG00000260298 | 0.308355904 | 0.356539013 | -0.247412897 | 0.951651182 | 1 | ACTG1P16   |
| ENSG00000259847 | 0.308355904 | 0.356539013 | -0.247412897 | 0.951651182 | 1 | LINC02126  |
| novel.1010      | 0.308355904 | 0.356539013 | -0.247412897 | 0.951651182 | 1 | -          |
| ENSG00000287498 | 0.308355904 | 0.356539013 | -0.247412897 | 0.951651182 | 1 | AC007749.2 |
| ENSG00000224826 | 0.308355904 | 0.356539013 | -0.247412897 | 0.951651182 | 1 | AC019109.1 |
| ENSG00000277250 | 0.308355904 | 0.387220594 | -0.247412897 | 0.951651182 | 1 | RF00017    |
| ENSG00000243321 | 0.308355904 | 0.387220594 | -0.247412897 | 0.951651182 | 1 | LINC01998  |
| ENSG00000201957 | 0.308355904 | 0.356539013 | -0.247412897 | 0.951651182 | 1 | RF00402    |
| ENSG00000251652 | 0.308355904 | 0.356539013 | -0.247412897 | 0.951651182 | 1 | AC092535.3 |
| ENSG00000237170 | 0.308355904 | 0.356539013 | -0.247412897 | 0.951651182 | 1 | RPS7P15    |
| ENSG00000249896 | 0.308355904 | 0.356539013 | -0.247412897 | 0.951651182 | 1 | LINC02495  |
| ENSG00000282742 | 0.308355904 | 0.356539013 | -0.247412897 | 0.951651182 | 1 | AC093323.3 |
| ENSG00000251624 | 0.308355904 | 0.387220594 | -0.247412897 | 0.951651182 | 1 | UNC93B7    |
| ENSG00000286371 | 0.308355904 | 0.356539013 | -0.247412897 | 0.951651182 | 1 | AC097450.1 |
| ENSG00000245685 | 0.308355904 | 0.387220594 | -0.247412897 | 0.951651182 | 1 | FRG1-DT    |
| ENSG00000253807 | 0.308355904 | 0.356539013 | -0.247412897 | 0.951651182 | 1 | LINC01170  |
| ENSG00000285771 | 0.308355904 | 0.387220594 | -0.247412897 | 0.951651182 | 1 | AL139095.5 |
| ENSG00000231762 | 0.308355904 | 0.356539013 | -0.247412897 | 0.951651182 | 1 | AL590426.1 |
| ENSG00000238059 | 0.308355904 | 0.387220594 | -0.247412897 | 0.951651182 | 1 | HSPE1P21   |
| ENSG00000270577 | 0.308355904 | 0.356539013 | -0.247412897 | 0.951651182 | 1 | AC006023.1 |
| ENSG00000223584 | 0.308355904 | 0.356539013 | -0.247412897 | 0.951651182 | 1 | TVP23CP1   |
| ENSG00000230146 | 0.308355904 | 0.356539013 | -0.247412897 | 0.951651182 | 1 | SEPHS1P4   |
| ENSG00000253643 | 0.308355904 | 0.387220594 | -0.247412897 | 0.951651182 | 1 | AC024958.1 |
| ENSG00000234982 | 0.308355904 | 0.356539013 | -0.247412897 | 0.951651182 | 1 | AL441963.1 |
| ENSG00000232466 | 0.308355904 | 0.356539013 | -0.247412897 | 0.951651182 | 1 | AL356133.1 |
| ENSG00000165204 | 0.308355904 | 0.387220594 | -0.247412897 | 0.951651182 | 1 | OR1K1      |
| ENSG00000265733 | 0.308355904 | 0.356539013 | -0.247412897 | 0.951651182 | 1 | SNORA74C-1 |
| ENSG00000152936 | 0.308355904 | 0.356539013 | -0.247412897 | 0.951651182 | 1 | LMNTD1     |
| ENSG00000223914 | 0.308355904 | 0.387220594 | -0.247412897 | 0.951651182 | 1 | LINC02471  |

|                 |             |             |              |             |             |            |
|-----------------|-------------|-------------|--------------|-------------|-------------|------------|
| ENSG00000231981 | 0.308355904 | 0.356539013 | -0.247412897 | 0.951651182 | 1           | RPL7L1P12  |
| ENSG00000285990 | 0.308355904 | 0.356539013 | -0.247412897 | 0.951651182 | 1           | AL589743.7 |
| ENSG00000243388 | 0.308355904 | 0.387220594 | -0.247412897 | 0.951651182 | 1           | RPL3P3     |
| ENSG00000242612 | 0.308355904 | 0.356539013 | -0.247412897 | 0.951651182 | 1           | DECR2      |
| ENSG00000260788 | 0.308355904 | 0.356539013 | -0.247412897 | 0.951651182 | 1           | AC009063.2 |
| ENSG00000263316 | 0.308355904 | 0.356539013 | -0.247412897 | 0.951651182 | 1           | AC027763.2 |
| ENSG00000275532 | 0.308355904 | 0.387220594 | -0.247412897 | 0.951651182 | 1           | AC006449.2 |
| ENSG00000200888 | 0.308355904 | 0.387220594 | -0.247412897 | 0.951651182 | 1           | RF00019    |
| ENSG00000267051 | 0.308355904 | 0.356539013 | -0.247412897 | 0.951651182 | 1           | AP005229.1 |
| ENSG00000269800 | 0.308355904 | 0.387220594 | -0.247412897 | 0.951651182 | 1           | PLEKHA3P1  |
| ENSG00000133475 | 0.308355904 | 0.387220594 | -0.247412897 | 0.951651182 | 1           | GGT2       |
| ENSG00000198574 | 3.666279786 | 3.404837359 | 0.089559176  | 0.951729507 | 0.970404785 | SH2D1B     |
| ENSG00000254266 | 1.522903516 | 1.396630344 | 0.111026411  | 0.951993745 | 0.970622612 | PKIA-AS1   |
| ENSG00000233673 | 1.214547612 | 1.345879667 | -0.162854175 | 0.952015769 | 1           | ANAPC1P1   |
| ENSG00000115257 | 54.72288123 | 56.06658107 | -0.031160302 | 0.95201786  | 0.970622612 | PCSK4      |
| ENSG00000279349 | 0.925067711 | 1.069617038 | -0.213685522 | 0.952641202 | 1           | AC092692.1 |
| ENSG00000287127 | 0.925067711 | 1.069617038 | -0.213685522 | 0.952641202 | 1           | AC009879.4 |
| ENSG00000269994 | 0.925067711 | 1.069617038 | -0.213685522 | 0.952641202 | 1           | AL513318.2 |
| ENSG00000267231 | 1.17296339  | 1.345879667 | -0.203081343 | 0.952690513 | 1           | AC005786.2 |
| ENSG00000062370 | 100.9964684 | 99.69507685 | 0.020105023  | 0.952741172 | 0.971321943 | ZNF112     |
| ENSG00000241933 | 0.616711807 | 0.693008929 | -0.185236516 | 0.952804786 | 1           | DENND6A-DT |
| ENSG00000237646 | 0.616711807 | 0.693008929 | -0.185236516 | 0.952804786 | 1           | HLCS-IT1   |
| ENSG00000233586 | 0.616711807 | 0.693008929 | -0.185236516 | 0.952804786 | 1           | AC246785.2 |
| ENSG00000206181 | 0.616711807 | 0.693008929 | -0.185236516 | 0.952804786 | 1           | ELOA2      |
| ENSG00000206658 | 0.616711807 | 0.693008929 | -0.185236516 | 0.952804786 | 1           | RNU6-1039P |
| ENSG00000121764 | 3.870083945 | 3.669203232 | 0.086884494  | 0.952845239 | 0.971364904 | HCRTR1     |
| ENSG00000224437 | 1.229662669 | 1.130980201 | 0.13400726   | 0.952874585 | 1           | PIGUP1     |
| ENSG00000134184 | 109.4663458 | 127.5172269 | -0.220213192 | 0.952877613 | 0.971364904 | GSTM1      |
| ENSG00000277744 | 10.80108998 | 10.46454105 | 0.056378186  | 0.95291421  | 0.971364904 | AC011462.4 |
| ENSG00000274718 | 1.850135422 | 2.038888596 | -0.151704189 | 0.952932861 | 0.971364904 | AL136964.1 |
| ENSG00000137500 | 807.7078504 | 797.1286582 | 0.018757915  | 0.953098155 | 0.97147612  | CCDC90B    |
| ENSG00000271452 | 13.51583289 | 13.88127516 | -0.038855735 | 0.95311675  | 0.97147612  | AC005034.5 |
| ENSG00000272374 | 32.73809501 | 31.96788696 | 0.033460514  | 0.953180598 | 0.97148044  | Z97832.2   |
| ENSG00000287049 | 1.526664462 | 1.386017859 | 0.125063231  | 0.953202292 | 0.97148044  | AC124862.1 |
| ENSG00000242507 | 0.909952655 | 1.00940975  | -0.167101059 | 0.953204152 | 1           | FO393401.2 |
| ENSG00000284391 | 4.149463386 | 3.964379082 | 0.073380432  | 0.953233165 | 0.97148044  | AL139398.1 |
| ENSG00000218073 | 1.526664462 | 1.682349583 | -0.153623085 | 0.95331268  | 0.971491073 | AL021407.3 |
| ENSG00000179774 | 3.369277992 | 3.567701877 | -0.086685685 | 0.953318383 | 0.971491073 | ATOH7      |
| ENSG00000103966 | 1212.893728 | 1229.937185 | -0.019850354 | 0.953376231 | 0.971511917 | EHD4       |
| ENSG00000030066 | 146.5280206 | 143.5779683 | 0.029985705  | 0.953416024 | 0.971514364 | NUP160     |
| ENSG00000287234 | 0.600343103 | 0.672939833 | -0.182912686 | 0.953580586 | 1           | AL592211.2 |
| ENSG00000254582 | 0.600343103 | 0.672939833 | -0.182912686 | 0.953580586 | 1           | PSMA2P1    |
| ENSG00000212332 | 0.600343103 | 0.672939833 | -0.182912686 | 0.953580586 | 1           | RNU6-780P  |
| ENSG00000175749 | 0.600343103 | 0.672939833 | -0.182912686 | 0.953580586 | 1           | EIF3KP1    |
| ENSG00000261315 | 0.600343103 | 0.672939833 | -0.182912686 | 0.953580586 | 1           | LARP4P     |
| ENSG00000240970 | 0.600343103 | 0.672939833 | -0.182912686 | 0.953580586 | 1           | RPL23AP64  |
| ENSG00000105879 | 394.5369048 | 397.9880273 | -0.01295736  | 0.953664392 | 0.971729335 | CBLL1      |
| ENSG00000285653 | 2.977753644 | 3.159256312 | -0.087694883 | 0.95374551  | 0.971773878 | AC006238.2 |
| ENSG00000128310 | 1.233423615 | 1.069617038 | 0.20181812   | 0.953968916 | 1           | GALR3      |
| ENSG00000273063 | 1.233423615 | 1.069617038 | 0.20181812   | 0.953968916 | 1           | AC007250.1 |
| ENSG00000280331 | 1.233423615 | 1.069617038 | 0.20181812   | 0.953968916 | 1           | AC061999.1 |

|                 |             |             |              |             |             |            |
|-----------------|-------------|-------------|--------------|-------------|-------------|------------|
| ENSG00000185055 | 9.157550748 | 9.476484666 | -0.046688702 | 0.954146213 | 0.97214403  | EFCAB10    |
| ENSG00000213363 | 0.601596751 | 0.672939833 | -0.180569268 | 0.954168689 | 1           | RPS3P6     |
| ENSG00000172014 | 1.525410814 | 1.406086955 | 0.1050163    | 0.954604216 | 0.972547625 | ANKRD20A4  |
| ENSG00000227868 | 2.052685933 | 1.874739808 | 0.143119602  | 0.954617203 | 0.972547625 | TEX46      |
| ENSG00000230756 | 21.27390787 | 20.80892431 | 0.030527168  | 0.954835577 | 0.972685159 | RHOQP3     |
| ENSG00000166046 | 68.18104592 | 66.85569528 | 0.031584744  | 0.954870051 | 0.972685159 | TCP11L2    |
| ENSG00000197951 | 196.5418539 | 198.9991275 | -0.016761851 | 0.954879333 | 0.972685159 | ZNF71      |
| ENSG00000127989 | 174.4549519 | 176.4736228 | -0.017792762 | 0.954901954 | 0.972685159 | MTERF1     |
| ENSG00000172262 | 523.7841743 | 528.7378645 | -0.013449824 | 0.955066047 | 0.972814167 | ZNF131     |
| ENSG00000273455 | 0.879722543 | 1.00940975  | -0.203938184 | 0.955177248 | 1           | AC072039.2 |
| ENSG00000256341 | 0.879722543 | 1.00940975  | -0.203938184 | 0.955177248 | 1           | AP006333.1 |
| ENSG00000250803 | 0.879722543 | 1.00940975  | -0.203938184 | 0.955177248 | 1           | AC010255.3 |
| ENSG00000243396 | 1.22840902  | 1.069617038 | 0.196443565  | 0.955206833 | 1           | AC084198.1 |
| ENSG00000285244 | 1.539272221 | 1.406086955 | 0.118512425  | 0.955215407 | 0.972928159 | DINOL      |
| ENSG00000269125 | 1.509042109 | 1.396630344 | 0.100555653  | 0.955338954 | 0.97297922  | AL137002.1 |
| ENSG00000186281 | 122.3041257 | 114.071461  | 0.100285721  | 0.955340438 | 0.97297922  | GPAT2      |
| ENSG00000156097 | 5.184168707 | 5.370466037 | -0.054686312 | 0.95541299  | 0.973009737 | GPR61      |
| ENSG00000188483 | 751.8194574 | 766.2216801 | -0.027671035 | 0.955445302 | 0.973009737 | IER5L      |
| novel.826       | 0.61420451  | 0.713078025 | -0.219784429 | 0.955718674 | 1           | -          |
| ENSG00000236467 | 0.61420451  | 0.713078025 | -0.219784429 | 0.955718674 | 1           | KCNMA1-AS1 |
| ENSG00000211767 | 0.61420451  | 0.713078025 | -0.219784429 | 0.955718674 | 1           | TRBJ2-3    |
| ENSG00000286892 | 0.61420451  | 0.713078025 | -0.219784429 | 0.955718674 | 1           | AC084212.1 |
| ENSG00000230648 | 0.61420451  | 0.713078025 | -0.219784429 | 0.955718674 | 1           | AL138831.1 |
| ENSG00000253105 | 0.61420451  | 0.713078025 | -0.219784429 | 0.955718674 | 1           | AP003548.1 |
| ENSG00000259048 | 0.61420451  | 0.713078025 | -0.219784429 | 0.955718674 | 1           | AL392023.2 |
| ENSG00000230447 | 0.61420451  | 0.713078025 | -0.219784429 | 0.955718674 | 1           | CTF2P      |
| ENSG00000258891 | 4.850597286 | 5.013927024 | -0.049539194 | 0.956219539 | 0.973730124 | AC005480.1 |
| ENSG00000183605 | 249.6026043 | 252.2729271 | -0.016481296 | 0.956227643 | 0.973730124 | SFXN4      |
| ENSG00000241782 | 1.188078446 | 1.10029862  | 0.124189429  | 0.956336207 | 1           | AP002812.1 |
| ENSG00000212607 | 4.206162664 | 4.42241945  | -0.057916978 | 0.956340396 | 0.973806773 | SNORA3B    |
| ENSG00000197099 | 1.541779519 | 1.386017859 | 0.142335569  | 0.956628999 | 0.974062472 | AC068631.1 |
| ENSG00000251957 | 1.218308559 | 1.130980201 | 0.123299202  | 0.956635417 | 1           | RNU6-1095P |
| ENSG00000258096 | 2.739958426 | 2.853467977 | -0.064528119 | 0.956684107 | 0.974080409 | AC025031.2 |
| ENSG00000064195 | 0.616711807 | 0.713078025 | -0.214682307 | 0.956730346 | 1           | DLX3       |
| ENSG00000277224 | 0.616711807 | 0.713078025 | -0.214682307 | 0.956730346 | 1           | HIST1H2BF  |
| ENSG00000204710 | 0.616711807 | 0.713078025 | -0.214682307 | 0.956730346 | 1           | SPDYC      |
| ENSG00000279176 | 0.616711807 | 0.713078025 | -0.214682307 | 0.956730346 | 1           | AC079316.2 |
| ENSG00000286316 | 0.616711807 | 0.713078025 | -0.214682307 | 0.956730346 | 1           | Z93020.1   |
| ENSG00000283390 | 0.616711807 | 0.713078025 | -0.214682307 | 0.956730346 | 1           | AC068631.3 |
| ENSG00000265237 | 0.616711807 | 0.713078025 | -0.214682307 | 0.956730346 | 1           | MIR3142    |
| ENSG00000285706 | 0.616711807 | 0.713078025 | -0.214682307 | 0.956730346 | 1           | AL807776.1 |
| ENSG00000286108 | 0.616711807 | 0.713078025 | -0.214682307 | 0.956730346 | 1           | AL359916.1 |
| ENSG00000105675 | 0.616711807 | 0.713078025 | -0.214682307 | 0.956730346 | 1           | ATP4A      |
| ENSG00000223553 | 0.616711807 | 0.713078025 | -0.214682307 | 0.956730346 | 1           | SMPD4P1    |
| ENSG00000083457 | 308.6532806 | 311.867119  | -0.015693503 | 0.956782083 | 0.974120711 | ITGAE      |
| ENSG00000188917 | 242.2057526 | 239.993935  | 0.013565642  | 0.956798677 | 0.974120711 | TRMT2B     |
| ENSG00000225767 | 0.879722543 | 0.774441189 | 0.203430345  | 0.95682785  | 1           | AL049637.1 |
| ENSG00000234981 | 0.879722543 | 0.774441189 | 0.203430345  | 0.95682785  | 1           | AC244034.1 |
| ENSG00000258626 | 0.879722543 | 0.774441189 | 0.203430345  | 0.95682785  | 1           | COX7A2P1   |
| ENSG00000224649 | 0.879722543 | 0.774441189 | 0.203430345  | 0.95682785  | 1           | AF124730.1 |
| ENSG00000281327 | 0.879722543 | 0.774441189 | 0.203430345  | 0.95682785  | 1           | LINC01338  |

|                 |             |             |              |             |             |             |
|-----------------|-------------|-------------|--------------|-------------|-------------|-------------|
| ENSG00000263676 | 0.879722543 | 0.774441189 | 0.203430345  | 0.95682785  | 1           | MIR4632     |
| ENSG00000258448 | 0.879722543 | 0.774441189 | 0.203430345  | 0.95682785  | 1           | AL442663.2  |
| ENSG00000149656 | 0.879722543 | 0.774441189 | 0.203430345  | 0.95682785  | 1           | LINC00266-1 |
| ENSG00000221971 | 0.879722543 | 0.774441189 | 0.203430345  | 0.95682785  | 1           | TTC4P1      |
| ENSG00000223723 | 0.879722543 | 0.774441189 | 0.203430345  | 0.95682785  | 1           | BX842568.2  |
| ENSG00000253374 | 0.879722543 | 0.774441189 | 0.203430345  | 0.95682785  | 1           | AC023644.1  |
| ENSG00000258748 | 0.879722543 | 0.774441189 | 0.203430345  | 0.95682785  | 1           | AL359399.1  |
| ENSG00000286883 | 18.68237924 | 18.32376371 | 0.0299521    | 0.956877635 | 0.974155277 | AC005041.5  |
| ENSG00000256779 | 3.388153995 | 3.179325408 | 0.083110507  | 0.956927731 | 0.974155277 | AP002383.3  |
| ENSG00000266469 | 2.359788188 | 2.558292127 | -0.107279283 | 0.956945113 | 0.974155277 | AC005288.1  |
| ENSG00000213131 | 2.68075185  | 2.50754145  | 0.099504721  | 0.956999164 | 0.97417213  | YWHAZP4     |
| ENSG00000144567 | 1430.232416 | 1419.592888 | 0.010949693  | 0.957060192 | 0.974196084 | RETREG2     |
| ENSG00000006611 | 1.232169966 | 1.345879667 | -0.144944088 | 0.95727688  | 1           | USH1C       |
| ENSG00000125726 | 10.0888867  | 10.62740557 | -0.069438952 | 0.957590533 | 0.97466369  | CD70        |
| ENSG00000212452 | 7.18140901  | 7.418811243 | -0.048960317 | 0.957674426 | 0.97466369  | SNORD69     |
| ENSG00000167842 | 385.6481341 | 381.8922976 | 0.013419595  | 0.957676658 | 0.97466369  | MIS12       |
| ENSG00000237757 | 2.376156893 | 2.537067156 | -0.08607692  | 0.957684968 | 0.97466369  | EEF1A1P30   |
| ENSG00000232470 | 4.517025865 | 4.718751175 | -0.056318656 | 0.957707146 | 0.97466369  | AL136368.1  |
| ENSG00000286602 | 2.742465724 | 2.618499415 | 0.079484287  | 0.957790996 | 0.974710845 | AC021660.4  |
| ENSG00000286700 | 0.922560414 | 1.00940975  | -0.150533936 | 0.957818905 | 1           | AC108075.1  |
| ENSG00000279861 | 20.87994749 | 21.26110409 | -0.029858359 | 0.957856828 | 0.974727233 | AC073548.1  |
| ENSG00000274963 | 4.150717034 | 4.402350354 | -0.074981444 | 0.957916824 | 0.974727233 | RN7SL600P   |
| ENSG00000259712 | 4.174678903 | 4.42241945  | -0.072988284 | 0.95791965  | 0.974727233 | AC023906.5  |
| ENSG00000273137 | 33.13714125 | 32.65948322 | 0.025236258  | 0.958012481 | 0.974783515 | AL022328.2  |
| ENSG00000234197 | 4.135601978 | 3.861721852 | 0.098147167  | 0.958122658 | 0.974857442 | ETV5-AS1    |
| novel.35        | 2.429095225 | 2.618499415 | -0.099645889 | 0.958236018 | 0.974934601 | -           |
| ENSG00000093183 | 1335.32587  | 1325.105215 | 0.011029977  | 0.958611123 | 0.975278051 | SEC22C      |
| ENSG00000260000 | 19.17093344 | 19.57644276 | -0.033580967 | 0.958769787 | 0.975401278 | AL133338.1  |
| ENSG00000126861 | 11.1182927  | 11.46346671 | -0.043044961 | 0.958909264 | 0.975504976 | OMG         |
| ENSG00000250240 | 6.260102245 | 6.022180899 | 0.055537997  | 0.958981356 | 0.975540118 | AC008840.1  |
| ENSG00000237693 | 1.521649867 | 1.41669944  | 0.095762064  | 0.959061703 | 0.975583654 | IRGM        |
| ENSG00000159712 | 0.586481695 | 0.672939833 | -0.205202966 | 0.959086545 | 1           | ANKRD18CP   |
| ENSG00000172410 | 0.586481695 | 0.672939833 | -0.205202966 | 0.959086545 | 1           | INSL5       |
| ENSG00000250383 | 0.586481695 | 0.672939833 | -0.205202966 | 0.959086545 | 1           | AC008871.1  |
| ENSG00000143921 | 0.586481695 | 0.672939833 | -0.205202966 | 0.959086545 | 1           | ABCG8       |
| ENSG00000232709 | 0.586481695 | 0.672939833 | -0.205202966 | 0.959086545 | 1           | MARK2P9     |
| ENSG00000240991 | 0.586481695 | 0.672939833 | -0.205202966 | 0.959086545 | 1           | RPL23AP67   |
| ENSG00000213371 | 0.586481695 | 0.672939833 | -0.205202966 | 0.959086545 | 1           | NAP1L1P3    |
| ENSG00000254846 | 0.586481695 | 0.672939833 | -0.205202966 | 0.959086545 | 1           | AL355075.1  |
| ENSG00000261632 | 0.586481695 | 0.672939833 | -0.205202966 | 0.959086545 | 1           | AC022872.1  |
| ENSG00000278212 | 0.586481695 | 0.672939833 | -0.205202966 | 0.959086545 | 1           | AC134878.2  |
| ENSG00000244578 | 0.586481695 | 0.672939833 | -0.205202966 | 0.959086545 | 1           | LINC01391   |
| ENSG00000252427 | 0.586481695 | 0.672939833 | -0.205202966 | 0.959086545 | 1           | RF00573     |
| ENSG00000279394 | 0.586481695 | 0.672939833 | -0.205202966 | 0.959086545 | 1           | AC015871.4  |
| ENSG00000207493 | 0.586481695 | 0.672939833 | -0.205202966 | 0.959086545 | 1           | SNORA46     |
| ENSG00000266155 | 0.586481695 | 0.672939833 | -0.205202966 | 0.959086545 | 1           | AC103810.4  |
| ENSG00000206739 | 0.586481695 | 0.672939833 | -0.205202966 | 0.959086545 | 1           | RF00019     |
| ENSG00000108679 | 10676.4307  | 10561.64865 | 0.015626111  | 0.95925261  | 0.975658833 | LGALS3BP    |
| ENSG00000220793 | 3.312578714 | 3.159256312 | 0.059537726  | 0.959256271 | 0.975658833 | RPL21P119   |
| ENSG00000207757 | 2.113146158 | 2.323323566 | -0.124584203 | 0.959308704 | 0.975658833 | MIR93       |
| ENSG00000099899 | 840.6621035 | 834.432126  | 0.010899371  | 0.959325073 | 0.975658833 | TRMT2A      |

|                 |             |             |              |             |             |            |
|-----------------|-------------|-------------|--------------|-------------|-------------|------------|
| ENSG00000251022 | 554.6881618 | 560.9929777 | -0.016255206 | 0.959325326 | 0.975658833 | THAP9-AS1  |
| ENSG00000153551 | 447.157824  | 441.87106   | 0.016745515  | 0.959404103 | 0.975658833 | CMTM7      |
| ENSG00000215374 | 10.35572966 | 10.779786   | -0.052400211 | 0.959407804 | 0.975658833 | FAM66B     |
| ENSG00000234199 | 2.095523804 | 2.241891306 | -0.075144219 | 0.959496286 | 0.975658833 | LINC01191  |
| ENSG00000109107 | 523.1672487 | 531.4085491 | -0.022018171 | 0.959522553 | 0.975658833 | ALDOC      |
| ENSG00000284976 | 342.0586332 | 339.0450027 | 0.012660016  | 0.959546897 | 0.975658833 | BX255925.3 |
| ENSG00000256705 | 1.54052587  | 1.436768536 | 0.09465413   | 0.959561749 | 0.975658833 | AL137779.1 |
| ENSG00000120029 | 583.9398743 | 588.9689548 | -0.011853078 | 0.959586242 | 0.975658833 | ARMH3      |
| ENSG00000253919 | 4.871980586 | 4.677457107 | 0.057936321  | 0.959717713 | 0.97575432  | THAP12P7   |
| ENSG00000269506 | 2.66939774  | 2.537067156 | 0.081570968  | 0.959954354 | 0.975956724 | AC110792.2 |
| ENSG00000273445 | 1.203193503 | 1.130980201 | 0.109969246  | 0.960393601 | 1           | AC133644.2 |
| ENSG00000272192 | 1.203193503 | 1.130980201 | 0.109969246  | 0.960393601 | 1           | AC100812.1 |
| ENSG00000235795 | 2.728604316 | 2.629111901 | 0.071129387  | 0.960410286 | 0.976367735 | AC093157.2 |
| ENSG00000225177 | 130.9012923 | 128.4524089 | 0.025605501  | 0.960449826 | 0.976367735 | AL590617.2 |
| ENSG00000080561 | 102.3696172 | 101.1134457 | 0.016064326  | 0.960471366 | 0.976367735 | MID2       |
| ENSG00000286168 | 0.615458159 | 0.672939833 | -0.154536196 | 0.960715297 | 1           | AC024937.3 |
| ENSG00000252782 | 0.615458159 | 0.672939833 | -0.154536196 | 0.960715297 | 1           | RNU6-341P  |
| ENSG00000228802 | 0.615458159 | 0.672939833 | -0.154536196 | 0.960715297 | 1           | AC073641.1 |
| ENSG00000260899 | 0.615458159 | 0.672939833 | -0.154536196 | 0.960715297 | 1           | AC106886.2 |
| ENSG00000115568 | 379.7605815 | 382.8813343 | -0.011947532 | 0.960769666 | 0.976622261 | ZNF142     |
| ENSG00000167315 | 694.7437978 | 689.0038193 | 0.011559377  | 0.960796928 | 0.976622261 | ACAA2      |
| ENSG00000162650 | 154.4467778 | 152.7496106 | 0.015234348  | 0.960929488 | 0.976718792 | ATXN7L2    |
| ENSG00000239556 | 8.445062737 | 8.702043477 | -0.037931029 | 0.961163176 | 0.9769181   | AC004951.2 |
| ENSG00000049245 | 2654.021999 | 2671.197469 | -0.009399097 | 0.961253227 | 0.976971408 | VAMP3      |
| ENSG00000143303 | 442.1368434 | 446.3635632 | -0.013350616 | 0.961348164 | 0.977029677 | RRNAD1     |
| ENSG00000235916 | 1.233423615 | 1.130980201 | 0.133499399  | 0.961600515 | 1           | AC233279.1 |
| ENSG00000175265 | 1105.915426 | 1089.278659 | 0.02203387   | 0.961864202 | 0.977515894 | GOLGA8A    |
| ENSG00000256399 | 1.480065645 | 1.345879667 | 0.126632059  | 0.962050425 | 0.977666905 | AC079866.1 |
| ENSG00000215158 | 26.44142313 | 26.06714811 | 0.024999704  | 0.962186436 | 0.977736407 | AC138409.2 |
| ENSG00000228695 | 4.761160598 | 4.523920805 | 0.083342972  | 0.962194082 | 0.977736407 | CES1P1     |
| ENSG00000186815 | 2473.519944 | 2435.172748 | 0.022618083  | 0.962243063 | 0.977747938 | TPCN1      |
| ENSG00000183336 | 1.845120827 | 1.702418679 | 0.096866529  | 0.962417621 | 0.977887064 | BOLA2      |
| ENSG00000257859 | 1.495180701 | 1.41669944  | 0.076404339  | 0.96248204  | 0.977914273 | CASC18     |
| ENSG00000184056 | 92.10060348 | 91.20433682 | 0.016178654  | 0.962601693 | 0.977997599 | VPS33B     |
| ENSG00000278991 | 7.107087378 | 7.44833695  | -0.066777334 | 0.962647432 | 0.978005824 | AC090181.3 |
| ENSG00000144021 | 1521.976155 | 1532.528244 | -0.010171522 | 0.962756987 | 0.97807888  | CIAO1      |
| ENSG00000167216 | 85.51215787 | 84.47776381 | 0.016679708  | 0.962810215 | 0.978094709 | KATNAL2    |
| ENSG00000287071 | 2.11063886  | 2.241891306 | -0.066064289 | 0.962925615 | 0.978152997 | AC093724.3 |
| ENSG00000120500 | 13.38731928 | 13.03241818 | 0.043070432  | 0.962942889 | 0.978152997 | ARR3       |
| ENSG00000152193 | 147.7379812 | 148.9680367 | -0.013081527 | 0.963089282 | 0.978263454 | RNF219     |
| ENSG00000170270 | 3.033199274 | 3.11911812  | -0.056698457 | 0.963229185 | 0.978367311 | GON7       |
| ENSG00000085871 | 342.0753423 | 336.4983158 | 0.022958043  | 0.963371875 | 0.978443867 | MGST2      |
| ENSG00000121281 | 308.6602602 | 304.1765143 | 0.021477498  | 0.963410985 | 0.978443867 | ADCY7      |
| ENSG00000163637 | 468.5049698 | 474.8475139 | -0.018806624 | 0.963417536 | 0.978443867 | PRICKLE2   |
| ENSG00000127957 | 95.95968932 | 96.99514518 | -0.0144211   | 0.963518884 | 0.9784711   | PMS2P3     |
| ENSG00000110031 | 536.0737762 | 524.134143  | 0.032791819  | 0.963519673 | 0.9784711   | LPXN       |
| ENSG00000234354 | 1.843867178 | 1.702418679 | 0.097433539  | 0.963626186 | 0.978541018 | RPS26P47   |
| ENSG00000104299 | 262.5401894 | 264.546992  | -0.011859612 | 0.96374948  | 0.978605478 | INTS9      |
| ENSG00000186567 | 183.4445999 | 186.8028988 | -0.025704986 | 0.963764996 | 0.978605478 | CEACAM19   |
| ENSG00000116106 | 37.47210226 | 38.06923554 | -0.027678392 | 0.964141712 | 0.978949735 | EPHA4      |
| novel.62        | 7.610685363 | 7.765893646 | -0.037578578 | 0.964200522 | 0.978971189 | -          |



|                 |             |             |              |             |             |             |
|-----------------|-------------|-------------|--------------|-------------|-------------|-------------|
| ENSG00000259326 | 3.050821627 | 3.149799701 | -0.058503395 | 0.96426011  | 0.978993431 | AC116158.1  |
| ENSG00000273062 | 3.31633966  | 3.149799701 | 0.068223578  | 0.964398885 | 0.979096067 | AL449106.1  |
| ENSG00000221962 | 2.722336072 | 2.862924587 | -0.073639537 | 0.964536128 | 0.979197138 | TMEM14EP    |
| ENSG00000239605 | 2.373649595 | 2.261960402 | 0.085846401  | 0.964775309 | 0.979401684 | STPG4       |
| ENSG00000054598 | 1261.188215 | 1297.227331 | -0.040718519 | 0.964820026 | 0.97940881  | FOXC1       |
| ENSG00000199053 | 4.203655366 | 4.382281258 | -0.050865122 | 0.965079719 | 0.979634154 | MIR324      |
| ENSG00000274093 | 2.376156893 | 2.496928964 | -0.067540875 | 0.965275781 | 0.979770884 | AC009032.1  |
| ENSG00000217442 | 3.05966844  | 3.159256312 | -0.058257983 | 0.96528984  | 0.979770884 | SYCE3       |
| ENSG00000121410 | 13.53979476 | 13.30983669 | 0.027758996  | 0.965430181 | 0.97987505  | A1BG        |
| ENSG00000184908 | 2.71348926  | 2.802717299 | -0.055989239 | 0.965593609 | 0.980002639 | CLCNKB      |
| ENSG00000186326 | 3.077290793 | 3.189937893 | -0.060834377 | 0.965794364 | 0.9801681   | RGS9BP      |
| ENSG00000059728 | 151.8633406 | 153.2260034 | -0.011391552 | 0.965834929 | 0.980170982 | MXD1        |
| ENSG00000151743 | 64.76266182 | 65.69673043 | -0.017718312 | 0.965952938 | 0.980252452 | AMN1        |
| ENSG00000198860 | 738.0562573 | 745.6186186 | -0.015110942 | 0.965992429 | 0.980254239 | TSEN15      |
| ENSG00000262943 | 3.007983756 | 3.168712922 | -0.07822185  | 0.966035301 | 0.980259457 | ALOX12P2    |
| ENSG00000254099 | 2.373649595 | 2.52645467  | -0.085442947 | 0.966138411 | 0.980289304 | AC005740.3  |
| ENSG00000243181 | 3.384393048 | 3.240688571 | 0.059237787  | 0.966171246 | 0.980289304 | AC087343.1  |
| ENSG00000103154 | 7.695107456 | 7.968896356 | -0.051394689 | 0.966177907 | 0.980289304 | NECAB2      |
| ENSG00000254441 | 1.525410814 | 1.426156051 | 0.092284836  | 0.966280104 | 0.980315513 | AP001646.1  |
| ENSG00000138785 | 261.6043095 | 263.4062984 | -0.010149036 | 0.966292386 | 0.980315513 | INTS12      |
| ENSG00000146411 | 44.9659125  | 43.37846681 | 0.050148528  | 0.966316935 | 0.980315513 | SLC2A12     |
| ENSG00000258590 | 2.40137241  | 2.292641984 | 0.083410495  | 0.96636069  | 0.980321623 | NBEAP1      |
| ENSG00000234684 | 79.47828327 | 80.24161721 | -0.01256527  | 0.966442923 | 0.980355532 | SDCBP2-AS1  |
| ENSG00000064995 | 480.1955703 | 476.1571335 | 0.011849436  | 0.966469583 | 0.980355532 | TAF11       |
| ENSG00000232640 | 1.522903516 | 1.447381022 | 0.075301256  | 0.966598159 | 0.980447625 | AL354892.2  |
| ENSG00000200742 | 2.094270155 | 2.231278821 | -0.079203353 | 0.966635846 | 0.980447625 | RF00019     |
| ENSG00000110075 | 1464.504073 | 1456.821485 | 0.007646938  | 0.966705731 | 0.980480231 | PPP6R3      |
| ENSG00000197976 | 1540.50344  | 1530.581842 | 0.00955197   | 0.96683054  | 0.980485951 | AKAP17A     |
| ENSG00000233817 | 3.561728042 | 3.770704588 | -0.067631649 | 0.966883412 | 0.980485951 | AL162727.1  |
| ENSG00000183155 | 226.2778339 | 223.8222481 | 0.01442909   | 0.966910327 | 0.980485951 | RAB1F       |
| ENSG00000223884 | 4.496896214 | 4.362212162 | 0.050965866  | 0.966928227 | 0.980485951 | AC068481.1  |
| ENSG00000163939 | 1129.140902 | 1136.657185 | -0.00960525  | 0.966929929 | 0.980485951 | PBRM1       |
| ENSG00000264448 | 2.402626059 | 2.52645467  | -0.069183121 | 0.966937802 | 0.980485951 | MIR378D2HG  |
| ENSG00000088756 | 17.80663111 | 17.15521386 | 0.048578509  | 0.967046972 | 0.98055838  | ARHGAP28    |
| ENSG00000272916 | 1.186824798 | 1.130980201 | 0.093489253  | 0.967111689 | 1           | AC022400.7  |
| ENSG00000274248 | 6.33191658  | 6.226339484 | 0.035236844  | 0.967336004 | 0.980813172 | AJ011932.1  |
| ENSG00000124523 | 260.4195217 | 258.4044777 | 0.010533984  | 0.967398211 | 0.980837967 | SIRT5       |
| ENSG00000228237 | 2.067800989 | 2.191140629 | -0.070399313 | 0.967492428 | 0.980877136 | EFCAB14-AS1 |
| ENSG00000179335 | 1098.112022 | 1107.274407 | -0.011681198 | 0.96751235  | 0.980877136 | CLK3        |
| ENSG00000104915 | 983.4717883 | 989.7939905 | -0.009075745 | 0.96755393  | 0.980881015 | STX10       |
| ENSG00000261916 | 3.031945625 | 3.12857473  | -0.057051624 | 0.967700322 | 0.980941119 | AC027796.1  |
| ENSG00000246877 | 11.23161998 | 11.59552125 | -0.037722855 | 0.96770401  | 0.980941119 | DNM1P35     |
| ENSG00000275895 | 131.7399726 | 130.6748262 | 0.011174499  | 0.967726486 | 0.980941119 | U2AF1L5     |
| ENSG00000283122 | 3.062175737 | 2.944356846 | 0.061204817  | 0.967818353 | 0.980995968 | HYMAI       |
| ENSG00000287126 | 48.81962809 | 47.96131064 | 0.021953721  | 0.967984918 | 0.981126523 | AC108488.3  |
| ENSG00000121897 | 250.4065381 | 248.1965154 | 0.011783728  | 0.96809798  | 0.98120284  | LIAS        |
| ENSG00000224183 | 27.81123826 | 27.3327514  | 0.023817352  | 0.968197566 | 0.981265495 | SDHDP6      |
| ENSG00000122678 | 383.8596851 | 381.1764286 | 0.010907351  | 0.968253189 | 0.981268838 | POLM        |
| ENSG00000160602 | 69.52159985 | 70.19883114 | -0.016775207 | 0.968276402 | 0.981268838 | AC010761.1  |
| ENSG00000207021 | 1.493927053 | 1.406086955 | 0.083505109  | 0.968407799 | 0.981363719 | RF00019     |
| ENSG00000272030 | 2.729857965 | 2.833398881 | -0.058696712 | 0.968598145 | 0.981505237 | AL162258.2  |

|                 |             |             |              |             |             |            |
|-----------------|-------------|-------------|--------------|-------------|-------------|------------|
| ENSG00000255621 | 2.417741115 | 2.496928964 | -0.04889906  | 0.968623005 | 0.981505237 | AC023790.2 |
| ENSG00000278893 | 2.128261214 | 2.261960402 | -0.076700162 | 0.968680781 | 0.981524708 | AC010533.1 |
| ENSG00000260895 | 2.391271949 | 2.292641984 | 0.077971419  | 0.968717777 | 0.981524708 | AP003071.1 |
| ENSG00000213178 | 688.7253226 | 684.4778782 | 0.009047029  | 0.968791268 | 0.981560891 | RPL22P1    |
| ENSG00000247363 | 4.293092054 | 4.077777192 | 0.059601413  | 0.968913692 | 0.981646648 | AC090061.1 |
| ENSG00000225094 | 1.789675198 | 1.936102971 | -0.097714404 | 0.969000462 | 0.981696276 | SETP20     |
| ENSG00000259163 | 1.17296339  | 1.069617038 | 0.135588669  | 0.969178016 | 1           | AL096869.2 |
| ENSG00000122735 | 1.17296339  | 1.069617038 | 0.135588669  | 0.969178016 | 1           | DNAI1      |
| ENSG00000241135 | 1.17296339  | 1.069617038 | 0.135588669  | 0.969178016 | 1           | LINC00881  |
| ENSG00000227197 | 1.17296339  | 1.069617038 | 0.135588669  | 0.969178016 | 1           | AC009365.3 |
| ENSG00000236536 | 3.08359037  | 3.250145181 | -0.077762531 | 0.969192167 | 0.981852207 | AC003986.3 |
| ENSG00000270074 | 0.925067711 | 1.00940975  | -0.139207149 | 0.969289554 | 1           | AC087203.3 |
| ENSG00000064692 | 14.71171796 | 14.26862415 | 0.037602825  | 0.969380709 | 0.982004921 | SNCAIP     |
| ENSG00000261251 | 2.738704777 | 2.813329785 | -0.049508568 | 0.969776809 | 0.982367875 | Z97055.2   |
| ENSG00000267852 | 2.402626059 | 2.486316478 | -0.051234746 | 0.969908799 | 0.982456218 | AC119396.2 |
| ENSG00000204267 | 14.12670373 | 15.50238998 | -0.134691852 | 0.969939648 | 0.982456218 | TAP2       |
| ENSG00000286312 | 1.17296339  | 1.10029862  | 0.103869968  | 0.970193861 | 1           | AL157769.1 |
| ENSG00000202392 | 1.17296339  | 1.10029862  | 0.103869968  | 0.970193861 | 1           | RN7SKP292  |
| ENSG00000205861 | 1.835020366 | 1.722487775 | 0.076881305  | 0.970334408 | 0.982817756 | PCOTH      |
| ENSG00000258479 | 1.538018572 | 1.456837632 | 0.078300347  | 0.970418342 | 0.982864452 | LINC00640  |
| ENSG00000249635 | 0.61420451  | 0.672939833 | -0.147429774 | 0.970475332 | 1           | AC109361.1 |
| ENSG00000205054 | 0.61420451  | 0.672939833 | -0.147429774 | 0.970475332 | 1           | LINC01121  |
| ENSG00000286519 | 0.61420451  | 0.672939833 | -0.147429774 | 0.970475332 | 1           | AC009236.1 |
| ENSG00000232613 | 0.61420451  | 0.672939833 | -0.147429774 | 0.970475332 | 1           | LINC02576  |
| ENSG00000236990 | 0.61420451  | 0.672939833 | -0.147429774 | 0.970475332 | 1           | AC025822.2 |
| ENSG00000281909 | 0.61420451  | 0.672939833 | -0.147429774 | 0.970475332 | 1           | HERC2P7    |
| ENSG00000175198 | 235.4519665 | 233.280449  | 0.014014894  | 0.970528814 | 0.982938023 | PCCA       |
| ENSG00000198198 | 915.0983667 | 923.960367  | -0.01366348  | 0.970571109 | 0.982942542 | SZT2       |
| ENSG00000230799 | 4.237646425 | 4.401194479 | -0.048969559 | 0.970641373 | 0.982968542 | AC007279.1 |
| ENSG00000286313 | 8.8856932   | 9.109333167 | -0.03475799  | 0.97067245  | 0.982968542 | AL360178.1 |
| ENSG00000172057 | 1241.118197 | 1252.354827 | -0.01290192  | 0.970825293 | 0.983054867 | ORMDL3     |
| ENSG00000166333 | 75.89983052 | 75.28789747 | 0.01336794   | 0.97083337  | 0.983054867 | ILK        |
| novel.331       | 8.935839501 | 8.683130256 | 0.044958219  | 0.970985324 | 0.983170416 | -          |
| ENSG00000256690 | 2.376156893 | 2.476859868 | -0.058744427 | 0.971041509 | 0.983181722 | AP001160.1 |
| ENSG00000139767 | 2.139615324 | 2.241891306 | -0.05308258  | 0.971072175 | 0.983181722 | SRRM4      |
| ENSG00000286011 | 3.649911081 | 3.52640781  | 0.03870067   | 0.971419129 | 0.983470793 | AC062037.3 |
| ENSG00000280067 | 14.75935696 | 14.58130056 | 0.023904582  | 0.971441493 | 0.983470793 | AC023818.1 |
| ENSG00000269958 | 291.967616  | 294.5811692 | -0.012160311 | 0.971471245 | 0.983470793 | AL049840.4 |
| ENSG00000283288 | 0.616711807 | 0.672939833 | -0.142326522 | 0.971486203 | 1           | SMIM33     |
| ENSG00000257817 | 0.616711807 | 0.672939833 | -0.142326522 | 0.971486203 | 1           | AC026765.2 |
| ENSG00000287804 | 0.616711807 | 0.672939833 | -0.142326522 | 0.971486203 | 1           | Z98745.2   |
| ENSG00000202490 | 0.616711807 | 0.672939833 | -0.142326522 | 0.971486203 | 1           | RNU6-597P  |
| ENSG00000204183 | 0.616711807 | 0.672939833 | -0.142326522 | 0.971486203 | 1           | GDF5OS     |
| ENSG00000261079 | 5.209312953 | 5.339784455 | -0.041398902 | 0.971570246 | 0.983525903 | AC009053.2 |
| ENSG00000148356 | 545.6618733 | 549.5670206 | -0.009726576 | 0.971601395 | 0.983525903 | LRSAM1     |
| ENSG00000276007 | 9.704955518 | 9.458855715 | 0.027654454  | 0.97165004  | 0.983536825 | AC079414.3 |
| ENSG00000198546 | 190.0984053 | 191.7282487 | -0.011616387 | 0.971805224 | 0.983595001 | ZNF511     |
| ENSG00000100599 | 546.3432447 | 551.8241011 | -0.014141209 | 0.971810337 | 0.983595001 | RIN3       |
| ENSG00000160117 | 40.600437   | 41.16314749 | -0.01715125  | 0.971821087 | 0.983595001 | ANKLE1     |
| ENSG00000234004 | 3.297463658 | 3.200550379 | 0.043030902  | 0.971902513 | 0.983639094 | AC092017.2 |
| ENSG00000111845 | 49.8229922  | 50.73342757 | -0.027579852 | 0.971987878 | 0.983687171 | PAK1IP1    |

|                 |             |             |              |             |             |            |
|-----------------|-------------|-------------|--------------|-------------|-------------|------------|
| ENSG00000136854 | 1116.830571 | 1125.581813 | -0.010949294 | 0.972076193 | 0.983738229 | STXBP1     |
| ENSG00000260907 | 6.167118074 | 5.820334064 | 0.078955121  | 0.972161027 | 0.983775808 | AC015818.2 |
| ENSG00000279608 | 4.775022005 | 4.941951375 | -0.050683013 | 0.972244637 | 0.983775808 | AL353795.3 |
| ENSG00000261189 | 8.320594805 | 8.002018082 | 0.050611317  | 0.972259475 | 0.983775808 | AL031058.1 |
| ENSG00000286634 | 4.752313786 | 4.596024848 | 0.04828704   | 0.972346551 | 0.983775808 | AC146507.3 |
| ENSG00000235760 | 1.201939854 | 1.161661783 | 0.078575798  | 0.972349632 | 1           | AC138655.1 |
| ENSG00000251279 | 2.727350667 | 2.782648203 | -0.04405436  | 0.972357585 | 0.983775808 | SMIM15-AS1 |
| ENSG00000238287 | 11.6392283  | 11.43509688 | 0.027859842  | 0.972378937 | 0.983775808 | AL603839.3 |
| ENSG00000232027 | 1.788421549 | 1.682349583 | 0.073853054  | 0.972396074 | 0.983775808 | AL671986.1 |
| ENSG00000125787 | 3.007983756 | 2.91483114  | 0.052187898  | 0.972429163 | 0.983775808 | GNRH2      |
| ENSG00000228010 | 9.668457162 | 9.814238852 | -0.028666549 | 0.972454112 | 0.983775808 | AC073343.2 |
| ENSG00000234754 | 3.381885751 | 3.486269618 | -0.054225031 | 0.972519323 | 0.98380347  | AL445470.1 |
| ENSG00000138678 | 121.1108032 | 123.0226218 | -0.021856849 | 0.972795053 | 0.984044085 | GPAT3      |
| ENSG00000279204 | 12.81247642 | 12.96403855 | -0.02577445  | 0.972941252 | 0.98405751  | AC134043.2 |
| ENSG00000196550 | 51.29063572 | 51.89256799 | -0.017167764 | 0.97295293  | 0.98405751  | FAM72A     |
| ENSG00000084674 | 1.526664462 | 1.467450118 | 0.063292856  | 0.97295494  | 0.98405751  | APOB       |
| ENSG00000204130 | 378.9725464 | 376.6964985 | 0.008357432  | 0.972959829 | 0.98405751  | RUFY2      |
| ENSG00000277452 | 2.697120555 | 2.772035718 | -0.049276172 | 0.973094812 | 0.984118259 | RN7SL473P  |
| ENSG00000204176 | 26.46713685 | 27.26938045 | -0.045918098 | 0.97312098  | 0.984118259 | SYT15      |
| ENSG00000105792 | 128.9222598 | 127.884986  | 0.01281347   | 0.973133528 | 0.984118259 | CFAP69     |
| ENSG00000184530 | 4.864458693 | 4.953719736 | -0.033596968 | 0.973294721 | 0.98424296  | C6orf58    |
| ENSG00000259736 | 1.17296339  | 1.110911105 | 0.092985951  | 0.973305811 | 1           | CRTC3-AS1  |
| ENSG00000256250 | 1.480065645 | 1.406086955 | 0.072754904  | 0.97339491  | 0.984285406 | AC073912.1 |
| ENSG00000237036 | 89.50659503 | 88.16220303 | 0.021129016  | 0.973448906 | 0.984285406 | ZEB1-AS1   |
| ENSG00000168795 | 297.1291756 | 295.3399077 | 0.008589142  | 0.973450349 | 0.984285406 | ZBTB5      |
| ENSG00000240399 | 7.949271379 | 8.071681981 | -0.031320132 | 0.973583184 | 0.98438141  | AC004801.2 |
| ENSG00000264539 | 2.125753916 | 2.211209725 | -0.044549895 | 0.973897559 | 0.98461586  | MIR548AR   |
| ENSG00000213988 | 46.79882537 | 46.34836816 | 0.015719646  | 0.97391234  | 0.98461586  | ZNF90      |
| ENSG00000224747 | 5.041793687 | 4.911141399 | 0.050367715  | 0.973928755 | 0.98461586  | MTCYBP21   |
| ENSG00000227495 | 7.016681776 | 6.888666832 | 0.028024042  | 0.97420112  | 0.984796257 | AC004771.1 |
| ENSG00000279078 | 3.01557692  | 2.934900236 | 0.04766248   | 0.974204356 | 0.984796257 | SND1-IT1   |
| ENSG00000155754 | 15.81795288 | 15.9922678  | -0.024336174 | 0.974220908 | 0.984796257 | C2CD6      |
| ENSG00000278590 | 2.694613258 | 2.629111901 | 0.05204817   | 0.974766843 | 0.985237341 | RN7SL113P  |
| ENSG00000274791 | 2.157237677 | 2.272572888 | -0.066931843 | 0.974791288 | 0.985237341 | F8A2       |
| ENSG00000226823 | 15.40504523 | 15.56362475 | -0.01926433  | 0.974821569 | 0.985237341 | SUGT1P1    |
| novel.692       | 212.9061717 | 208.1205545 | 0.033236425  | 0.974941416 | 0.985237341 | -          |
| ENSG00000249791 | 1.495180701 | 1.426156051 | 0.068536584  | 0.974944454 | 0.985237341 | AC008494.2 |
| ENSG00000140986 | 2.11063886  | 2.191140629 | -0.042673025 | 0.974944734 | 0.985237341 | RPL3L      |
| ENSG00000166260 | 659.5170453 | 662.4440492 | -0.006736317 | 0.974956588 | 0.985237341 | COX11      |
| ENSG00000141570 | 151.2893241 | 150.4336418 | 0.010007518  | 0.974960626 | 0.985237341 | CBX8       |
| ENSG00000228113 | 1.218308559 | 1.161661783 | 0.085940111  | 0.975086806 | 1           | AC003991.1 |
| ENSG00000273004 | 6.275217302 | 6.410557368 | -0.029298053 | 0.97518636  | 0.985427125 | AL078644.2 |
| ENSG00000140675 | 5.129976726 | 5.044608606 | 0.027830358  | 0.975263721 | 0.985442861 | SLC5A2     |
| ENSG00000197774 | 338.2890553 | 340.1539872 | -0.008274305 | 0.975277791 | 0.985442861 | EME2       |
| ENSG00000179630 | 235.219771  | 237.3534743 | -0.01204764  | 0.975391049 | 0.985518972 | LACC1      |
| ENSG00000169621 | 80.29797286 | 79.65486153 | 0.011451655  | 0.975486681 | 0.985577268 | APLF       |
| ENSG00000107819 | 1315.194327 | 1303.698359 | 0.01290146   | 0.975527513 | 0.985580196 | SFXN3      |
| ENSG00000251600 | 8.458924145 | 8.582913171 | -0.031242354 | 0.975616551 | 0.985587573 | AC107223.1 |
| ENSG00000184281 | 855.4681302 | 859.5977998 | -0.007166302 | 0.975673781 | 0.985587573 | TSSC4      |
| ENSG00000132485 | 2271.053394 | 2281.003559 | -0.006190853 | 0.975710975 | 0.985587573 | ZRANB2     |
| ENSG00000110076 | 202.9151239 | 209.7608393 | -0.047769846 | 0.975721878 | 0.985587573 | NRXN2      |

|                 |             |             |              |             |             |            |
|-----------------|-------------|-------------|--------------|-------------|-------------|------------|
| ENSG0000056097  | 1738.665168 | 1746.190746 | -0.006423972 | 0.975724489 | 0.985587573 | ZFR        |
| ENSG00000164403 | 258.5506365 | 262.1115077 | -0.019770575 | 0.975962459 | 0.985772434 | SHROOM1    |
| ENSG00000265791 | 3.924275926 | 4.055267952 | -0.037541968 | 0.975983385 | 0.985772434 | AC127024.4 |
| ENSG00000257298 | 6.272710004 | 6.409401493 | -0.03007743  | 0.976060505 | 0.985812003 | AC008147.2 |
| ENSG00000112559 | 396.5503803 | 410.8021166 | -0.05106286  | 0.976102776 | 0.985816374 | MDFI       |
| ENSG00000109452 | 362.2647705 | 360.0058747 | 0.008498902  | 0.976277114 | 0.985954121 | INPP4B     |
| ENSG00000272129 | 10.58091711 | 10.71025049 | -0.01948407  | 0.976478832 | 0.986119506 | AL359715.3 |
| ENSG00000231066 | 4.737198729 | 4.882899962 | -0.045241294 | 0.976782818 | 0.98636713  | NPM1P9     |
| novel.991       | 427.1764875 | 411.7007152 | 0.053296693  | 0.976799965 | 0.98636713  | -          |
| ENSG00000222019 | 24.75379238 | 25.10018831 | -0.01455515  | 0.976882569 | 0.986412205 | URAHP      |
| ENSG00000125631 | 1.817398012 | 1.742556871 | 0.046431386  | 0.977061693 | 0.986537451 | HTR5BP     |
| ENSG00000136485 | 1801.846717 | 1808.236835 | -0.005235512 | 0.977116181 | 0.986537451 | DCAF7      |
| ENSG00000144199 | 214.1140234 | 212.7174566 | 0.008262518  | 0.977144579 | 0.986537451 | FAHD2B     |
| ENSG00000266891 | 2.961384939 | 2.893606169 | 0.04207162   | 0.977158491 | 0.986537451 | AP000902.1 |
| ENSG00000243964 | 2.082916045 | 2.160459047 | -0.0454528   | 0.977239611 | 0.986581011 | RPL23AP65  |
| ENSG00000250878 | 3.924275926 | 3.792057953 | 0.037136176  | 0.977368566 | 0.98667286  | METTL21EP  |
| ENSG00000279518 | 11.8596859  | 11.9546288  | -0.020143491 | 0.977465805 | 0.986732683 | AC083843.4 |
| ENSG00000172922 | 906.1428774 | 911.1800847 | -0.008176842 | 0.977578153 | 0.986778945 | RNASEH2C   |
| ENSG00000114388 | 375.2545106 | 373.7226162 | 0.006477554  | 0.977587593 | 0.986778945 | NPRL2      |
| ENSG00000258857 | 2.464339932 | 2.558292127 | -0.052974376 | 0.977779155 | 0.986933964 | AL359397.1 |
| ENSG00000166340 | 2657.095711 | 2637.141181 | 0.010974627  | 0.977843056 | 0.986943973 | TPP1       |
| ENSG00000176761 | 3.842361131 | 3.760092102 | 0.045421732  | 0.977865045 | 0.986943973 | ZNF285B    |
| ENSG00000026652 | 437.2973437 | 434.239717  | 0.010811131  | 0.978060427 | 0.987079345 | AGPAT4     |
| ENSG00000229052 | 1.511549406 | 1.456837632 | 0.057895339  | 0.978113149 | 0.987079345 | AL449283.1 |
| ENSG00000110887 | 1.511549406 | 1.456837632 | 0.057895339  | 0.978113149 | 0.987079345 | DAO        |
| ENSG00000085741 | 6.471713032 | 6.673767367 | -0.042090879 | 0.97817788  | 0.987106327 | WNT11      |
| ENSG00000197332 | 4.806505766 | 4.748276881 | 0.027729296  | 0.978398871 | 0.987290988 | AC008543.1 |
| novel.801       | 30.52311787 | 30.1696179  | 0.017348667  | 0.978619859 | 0.987475631 | -          |
| novel.785       | 5.842393466 | 5.677410247 | 0.036744253  | 0.978880728 | 0.987700501 | -          |
| ENSG00000287967 | 3.313832363 | 3.260757667 | 0.02998798   | 0.978978112 | 0.987720994 | AC004882.3 |
| ENSG00000213842 | 1.7871679   | 1.874739808 | -0.052233622 | 0.979011639 | 0.987720994 | SUGT1P2    |
| ENSG00000278075 | 2.125753916 | 2.191140629 | -0.035774971 | 0.97901509  | 0.987720994 | AC114341.1 |
| ENSG00000217643 | 2.461832635 | 2.527610546 | -0.040660688 | 0.979114156 | 0.987769528 | PTGES3P2   |
| ENSG00000145348 | 493.827293  | 491.770597  | 0.005846939  | 0.979139233 | 0.987769528 | TBCK       |
| ENSG00000213997 | 1.22840902  | 1.161661783 | 0.090440241  | 0.979260379 | 1           | PGAM1P7    |
| ENSG00000224599 | 1.22840902  | 1.161661783 | 0.090440241  | 0.979260379 | 1           | BMS1P12    |
| novel.605       | 2.40137241  | 2.323323566 | 0.060850737  | 0.979845708 | 0.98843781  | -          |
| ENSG00000267474 | 2.987854105 | 2.934900236 | 0.037006479  | 0.979935346 | 0.98843781  | AC008569.2 |
| novel.664       | 27.79952814 | 28.08827937 | -0.013430231 | 0.979943534 | 0.98843781  | -          |
| ENSG00000273998 | 2.723589721 | 2.679862578 | 0.041933027  | 0.979953855 | 0.98843781  | AL049794.1 |
| ENSG00000239282 | 8.479053796 | 8.354961075 | 0.024228112  | 0.980167748 | 0.988585933 | CASTOR1    |
| ENSG00000168806 | 182.8968941 | 181.7212342 | 0.007858919  | 0.980176807 | 0.988585933 | LCMT2      |
| ENSG00000267778 | 2.429095225 | 2.50754145  | -0.046579745 | 0.980407271 | 0.988779989 | AC004221.1 |
| ENSG00000253133 | 2.12199297  | 2.191140629 | -0.040181504 | 0.980526383 | 0.988856075 | AC009630.1 |
| ENSG00000258571 | 2.12199297  | 2.200597239 | -0.047524282 | 0.980558833 | 0.988856075 | PTTG4P     |
| ENSG00000208037 | 1.466204238 | 1.41669944  | 0.053778902  | 0.980606045 | 0.988865303 | MIR320A    |
| ENSG00000100889 | 13.86577301 | 14.0335272  | -0.014514619 | 0.980675325 | 0.988896783 | PCK2       |
| ENSG00000226696 | 12.04078184 | 11.93314704 | 0.022100796  | 0.980941667 | 0.989126968 | LENG8-AS1  |
| ENSG00000228126 | 7.251969696 | 7.154316975 | 0.01885956   | 0.981015981 | 0.989163512 | FALEC      |
| ENSG00000099795 | 1504.447835 | 1499.202034 | 0.005013491  | 0.981223102 | 0.98929164  | NDUFB7     |
| ENSG00000155760 | 362.7225088 | 360.7060288 | 0.007833762  | 0.981254138 | 0.98929164  | FZD7       |

|                 |             |             |              |             |             |             |
|-----------------|-------------|-------------|--------------|-------------|-------------|-------------|
| ENSG00000259153 | 4.931187162 | 4.750717026 | 0.045052381  | 0.981275334 | 0.98929164  | AC004816.1  |
| ENSG00000158411 | 410.188137  | 408.5174335 | 0.006648428  | 0.981295364 | 0.98929164  | MITD1       |
| ENSG00000262165 | 13.03891753 | 13.16819714 | -0.017075158 | 0.981370819 | 0.98932932  | AC233723.1  |
| ENSG00000228787 | 1.789675198 | 1.722487775 | 0.045974491  | 0.981461151 | 0.989381996 | NLGN4Y-AS1  |
| ENSG00000170917 | 91.83737893 | 92.32025661 | -0.007808141 | 0.981675991 | 0.989537679 | NUDT6       |
| ENSG00000254285 | 1.524157165 | 1.4981317   | 0.04131395   | 0.981691762 | 0.989537679 | KRT8P3      |
| ENSG00000226361 | 2.095523804 | 2.149846562 | -0.033599474 | 0.981815135 | 0.989623643 | TERF1P5     |
| ENSG00000224080 | 9.240363187 | 9.425733988 | -0.023861837 | 0.981863647 | 0.989634067 | UBE2FP1     |
| ENSG00000203321 | 2.990361403 | 2.944356846 | 0.033698345  | 0.981901658 | 0.989634067 | CARNMT1-AS1 |
| ENSG00000237429 | 3.001715513 | 2.954969332 | 0.033940408  | 0.982099148 | 0.98975357  | BX293535.1  |
| ENSG00000272858 | 2.128261214 | 2.191140629 | -0.03689904  | 0.982122636 | 0.98975357  | Z93930.3    |
| ENSG00000260145 | 2.987854105 | 2.913675265 | 0.041429637  | 0.982134513 | 0.98975357  | AC023825.2  |
| ENSG00000270933 | 3.076037145 | 3.11911812  | -0.034026441 | 0.982424161 | 0.990007064 | AC010719.1  |
| ENSG00000147485 | 1.845120827 | 1.783850939 | 0.043381596  | 0.982562214 | 0.990107779 | PXDNL       |
| ENSG00000279044 | 2.082916045 | 2.140389951 | -0.035634437 | 0.982658685 | 0.99013823  | AC007787.2  |
| ENSG00000250656 | 1.802282956 | 1.874739808 | -0.036302811 | 0.982668653 | 0.99013823  | ST3GAL1P1   |
| ENSG00000229587 | 1.828752122 | 1.773238453 | 0.037689331  | 0.983006979 | 0.990433397 | AL158825.2  |
| ENSG00000279982 | 1.803536605 | 1.753169357 | 0.032032454  | 0.983037836 | 0.990433397 | AL162274.3  |
| ENSG00000143624 | 273.8195363 | 270.5748373 | 0.017327829  | 0.983137453 | 0.990495353 | INTS3       |
| ENSG00000229589 | 7.909012077 | 7.83542915  | 0.0219394    | 0.983414265 | 0.990730508 | ACVR2B-AS1  |
| ENSG00000267283 | 3.007983756 | 2.945512721 | 0.037454691  | 0.983447127 | 0.990730508 | AC005306.1  |
| ENSG00000106336 | 16.78202625 | 16.60127593 | 0.015439089  | 0.983487669 | 0.990732935 | FBXO24      |
| ENSG00000177728 | 1212.117932 | 1216.865635 | -0.00538205  | 0.983629259 | 0.990825922 | TMEM94      |
| ENSG00000280184 | 4.542241382 | 4.575955752 | -0.020141191 | 0.983656249 | 0.990825922 | AL023806.3  |
| ENSG00000173442 | 2393.882329 | 2400.802247 | -0.004114719 | 0.983789015 | 0.990921238 | EHBP1L1     |
| ENSG00000249709 | 6.9574752   | 7.002064943 | -0.018152    | 0.984001315 | 0.991083822 | ZNF564      |
| ENSG00000287250 | 1.814890715 | 1.885352294 | -0.041254261 | 0.984026722 | 0.991083822 | AC073046.4  |
| ENSG00000236383 | 38.78303898 | 39.05241164 | -0.008804487 | 0.984340693 | 0.991361614 | CCDC200     |
| ENSG00000265496 | 2.128261214 | 2.180528143 | -0.032041071 | 0.984470298 | 0.991384569 | AC100778.3  |
| ENSG00000261864 | 1.480065645 | 1.447381022 | 0.04145212   | 0.984475591 | 0.991384569 | AC130462.1  |
| ENSG00000230300 | 3.90916087  | 3.812127049 | 0.028645018  | 0.98447796  | 0.991384569 | STARD13-IT1 |
| ENSG00000213943 | 2.75758078  | 2.792104814 | -0.030230412 | 0.984648684 | 0.991509654 | KRT18P17    |
| ENSG00000257556 | 18.75920817 | 18.70024342 | 0.011572831  | 0.984678499 | 0.991509654 | LINC02298   |
| ENSG00000275897 | 2.451732174 | 2.496928964 | -0.031569422 | 0.984737051 | 0.991530184 | AC021491.4  |
| ENSG00000271554 | 3.532751578 | 3.627909165 | -0.029841273 | 0.984840759 | 0.991596178 | AL138787.2  |
| ENSG00000275383 | 3.031945625 | 3.005720009 | 0.027417796  | 0.984918578 | 0.991600799 | AC126773.4  |
| ENSG00000184194 | 519.420438  | 516.5437595 | 0.008505131  | 0.984921682 | 0.991600799 | GPR173      |
| ENSG00000154608 | 18.6155795  | 18.90209026 | -0.013996369 | 0.985002817 | 0.991644057 | CEP170P1    |
| ENSG00000146574 | 419.7083076 | 421.7085851 | -0.007036577 | 0.985116099 | 0.991719675 | CCZ1B       |
| ENSG00000213228 | 3.910414519 | 3.984448178 | -0.020870277 | 0.985296361 | 0.991862713 | RPL12P38    |
| ENSG00000203950 | 981.3668357 | 978.3758803 | 0.004609061  | 0.98564738  | 0.992177628 | RTL8A       |
| ENSG00000105520 | 1210.257878 | 1205.759675 | 0.005633248  | 0.98568739  | 0.992179461 | PLPPR2      |
| ENSG00000232460 | 2.124500267 | 2.160459047 | -0.023593344 | 0.985736203 | 0.992190156 | BMPR1AP2    |
| ENSG00000169957 | 760.2216405 | 758.5437779 | 0.003161443  | 0.985841694 | 0.992239912 | ZNF768      |
| ENSG00000197880 | 1.774560141 | 1.722487775 | 0.036543755  | 0.985877387 | 0.992239912 | MDS2        |
| ENSG00000237418 | 2.709728314 | 2.742510011 | -0.029018837 | 0.985900209 | 0.992239912 | AC069257.2  |
| ENSG00000267348 | 14.9429602  | 14.83633822 | 0.014348444  | 0.986024381 | 0.992326443 | GEMIN7-AS1  |
| ENSG00000083937 | 730.2539326 | 728.0928887 | 0.004198233  | 0.986249238 | 0.992471189 | CHMP2B      |
| ENSG00000165076 | 1.481319294 | 1.548882377 | -0.045590943 | 0.986291554 | 0.992471189 | PRSS37      |
| ENSG00000234476 | 1.511549406 | 1.487519214 | 0.035300823  | 0.986308906 | 0.992471189 | AC092811.1  |
| ENSG00000227199 | 22.76880383 | 22.68353573 | 0.011415158  | 0.986321007 | 0.992471189 | ST7-AS1     |

|                 |             |             |              |             |             |            |
|-----------------|-------------|-------------|--------------|-------------|-------------|------------|
| ENSG00000239577 | 1.466204238 | 1.436768536 | 0.037526264  | 0.986466675 | 0.992579323 | RN7SL388P  |
| ENSG00000275485 | 3.924275926 | 3.993904788 | -0.021071529 | 0.986823353 | 0.992892528 | AL512652.1 |
| ENSG00000237118 | 6.068905845 | 6.13429474  | -0.014065942 | 0.986912657 | 0.992892528 | CYP2F2P    |
| ENSG00000207622 | 1.481319294 | 1.467450118 | 0.030579972  | 0.986917213 | 0.992892528 | MIR619     |
| ENSG00000223510 | 3.604565913 | 3.557089392 | 0.018332464  | 0.986933752 | 0.992892528 | CDRT15     |
| ENSG00000008516 | 16.71905873 | 16.91523661 | -0.01182951  | 0.986969032 | 0.992892528 | MMP25      |
| ENSG00000279179 | 12.29752433 | 12.23906377 | 0.011002549  | 0.987089074 | 0.992974841 | AL662907.2 |
| ENSG00000279077 | 1.803536605 | 1.762625967 | 0.02771063   | 0.987254676 | 0.993102978 | AC023090.2 |
| ENSG00000235945 | 1.480065645 | 1.467450118 | 0.029682331  | 0.987300766 | 0.993110891 | AC002543.1 |
| ENSG00000274765 | 1.7871679   | 1.742556871 | 0.031202514  | 0.98742246  | 0.993156399 | AC018926.1 |
| ENSG00000286401 | 1.7871679   | 1.742556871 | 0.031202514  | 0.98742246  | 0.993156399 | AC069547.2 |
| ENSG00000235848 | 2.152223082 | 2.200597239 | -0.030253293 | 0.987635298 | 0.993332017 | RMDN2-AS1  |
| ENSG00000213144 | 3.647403784 | 3.607840069 | 0.016843167  | 0.987735314 | 0.993359982 | AC084880.1 |
| novel.1055      | 4.178439849 | 4.219416739 | -0.017302498 | 0.98773957  | 0.993359982 | -          |
| ENSG00000213304 | 1.818651661 | 1.783850939 | 0.025375215  | 0.9878525   | 0.993405934 | AC008481.2 |
| ENSG00000230454 | 21.39454358 | 21.54322731 | -0.008660631 | 0.987887485 | 0.993405934 | U73166.1   |
| ENSG00000272432 | 4.883334696 | 4.901813183 | -0.016863324 | 0.98789997  | 0.993405934 | AL031432.3 |
| ENSG00000285879 | 1.480065645 | 1.456837632 | 0.032748102  | 0.988025563 | 0.993455325 | AC018628.2 |
| ENSG00000226632 | 1.480065645 | 1.456837632 | 0.032748102  | 0.988025563 | 0.993455325 | UBE2V1P1   |
| ENSG00000174501 | 76.26048401 | 75.80995076 | 0.009301852  | 0.988129997 | 0.993521882 | ANKRD36C   |
| ENSG00000197798 | 367.5871813 | 368.795177  | -0.005364319 | 0.988180479 | 0.993534191 | FAM118B    |
| ENSG00000236200 | 42.38230557 | 42.73924382 | -0.009596106 | 0.988304036 | 0.993583697 | KDM4A-AS1  |
| ENSG00000177427 | 5.49377826  | 5.594693718 | -0.015996004 | 0.988315242 | 0.993583697 | MIEF2      |
| ENSG00000220937 | 4.22127772  | 4.250098321 | -0.01451945  | 0.988385183 | 0.993583697 | HNRNPA1P41 |
| ENSG00000227172 | 2.416487466 | 2.435565801 | -0.022402724 | 0.988407972 | 0.993583697 | AC011290.1 |
| ENSG00000134028 | 7.956864543 | 7.886179827 | 0.018705823  | 0.988445798 | 0.993583697 | ADAMDEC1   |
| ENSG00000019102 | 8.105223073 | 8.079854321 | 0.013487002  | 0.98849315  | 0.993583697 | VSIG2      |
| ENSG00000115286 | 451.0561564 | 449.958783  | 0.003431254  | 0.988497417 | 0.993583697 | NDUFS7     |
| ENSG00000270060 | 14.66365203 | 14.82572573 | -0.012834884 | 0.988574645 | 0.993622881 | AC090589.3 |
| ENSG00000280138 | 72.20776574 | 71.81707345 | 0.009063902  | 0.988745485 | 0.993756149 | AC027290.2 |
| ENSG00000123405 | 3.66251884  | 3.740023006 | -0.01771361  | 0.988794964 | 0.993767435 | NFE2       |
| ENSG00000284930 | 4.861951396 | 4.972504562 | -0.020146213 | 0.988964387 | 0.993869866 | AC005280.2 |
| ENSG00000243725 | 14.89797104 | 14.71836379 | 0.010059264  | 0.98897339  | 0.993869866 | TTC4       |
| ENSG00000162913 | 5.056908743 | 5.155566571 | -0.016586999 | 0.98914648  | 0.993976833 | OBSCN-AS1  |
| ENSG00000198963 | 72.77371869 | 71.86753298 | 0.017359827  | 0.989156346 | 0.993976833 | RORB       |
| ENSG00000131634 | 449.0985441 | 452.091467  | -0.009715464 | 0.989204466 | 0.993986743 | TMEM204    |
| ENSG00000069020 | 267.384759  | 268.6879173 | -0.007088953 | 0.989577226 | 0.994322849 | MAST4      |
| ENSG00000241678 | 2.11063886  | 2.129777466 | -0.017290731 | 0.989816413 | 0.99452472  | AC091564.1 |
| ENSG00000270993 | 2.461832635 | 2.395427609 | 0.023781454  | 0.989871714 | 0.994540805 | AC111186.1 |
| ENSG00000278974 | 51.39611293 | 51.04016217 | 0.007529089  | 0.989939135 | 0.994540805 | AC093909.6 |
| ENSG00000240441 | 1.466204238 | 1.518200796 | -0.033576045 | 0.98994726  | 0.994540805 | AC007622.1 |
| ENSG00000221500 | 13.14701676 | 13.25793013 | -0.009393395 | 0.989994449 | 0.994549755 | SNORD100   |
| ENSG00000265806 | 10.30279132 | 10.33364238 | -0.008175873 | 0.990043536 | 0.994560612 | MIR4292    |
| ENSG00000136682 | 366.8348491 | 366.1736298 | 0.003421469  | 0.990399836 | 0.994858421 | CBWD2      |
| ENSG00000133134 | 31.17675531 | 31.37496672 | -0.007828216 | 0.990417929 | 0.994858421 | BEX2       |
| ENSG00000175697 | 18.13085752 | 17.99803467 | 0.010338446  | 0.990454868 | 0.994858421 | GPR156     |
| ENSG00000168612 | 189.7402591 | 190.2137252 | -0.002922651 | 0.990591498 | 0.994957193 | ZSWIM1     |
| ENSG00000267641 | 1.495180701 | 1.548882377 | -0.02563536  | 0.990632316 | 0.994959726 | BNIP3P16   |
| ENSG00000238198 | 2.140868972 | 2.089639274 | 0.017145787  | 0.990719047 | 0.995008371 | AL357055.3 |
| ENSG00000233295 | 1.50778846  | 1.4981317   | 0.024301459  | 0.990815057 | 0.995066332 | FAM90A20P  |
| ENSG00000233175 | 3.019337866 | 3.097764754 | -0.021336972 | 0.990856749 | 0.995069738 | AC008105.1 |

|                 |             |             |              |             |             |            |
|-----------------|-------------|-------------|--------------|-------------|-------------|------------|
| ENSG00000076108 | 1898.693358 | 1904.41554  | -0.004195005 | 0.990910662 | 0.995085417 | BAZ2A      |
| ENSG00000196312 | 579.656001  | 581.0595419 | -0.003385293 | 0.990972648 | 0.995109202 | MFS14C     |
| ENSG00000259856 | 25.8596713  | 25.73196247 | 0.008682894  | 0.991058297 | 0.995139981 | RAB43P1    |
| ENSG00000182670 | 4223.159618 | 4211.791086 | 0.003957964  | 0.991079905 | 0.995139981 | TTC3       |
| ENSG00000180104 | 1132.225757 | 1130.509338 | 0.00215563   | 0.991162149 | 0.995184101 | EXOC3      |
| ENSG00000240356 | 181.2980162 | 181.8643679 | -0.004335387 | 0.991214634 | 0.995198338 | RPL23AP7   |
| ENSG00000248449 | 3.896553111 | 3.842808631 | 0.013406036  | 0.991272785 | 0.995218263 | PCDHGB8P   |
| ENSG00000187758 | 2.138361675 | 2.089639274 | 0.015926588  | 0.991377794 | 0.99528523  | ADH1A      |
| ENSG00000230542 | 1.495180701 | 1.4981317   | 0.019780791  | 0.991450706 | 0.995305548 | LINC00102  |
| ENSG00000255487 | 2.123246619 | 2.140389951 | -0.015127326 | 0.991474651 | 0.995305548 | AC087362.2 |
| ENSG00000262147 | 3.561728042 | 3.61729668  | -0.013555228 | 0.991591986 | 0.995384877 | AC124283.2 |
| ENSG00000184076 | 607.7581272 | 606.6777345 | 0.002650434  | 0.991663796 | 0.995418502 | UQCR10     |
| ENSG00000169851 | 137.0286927 | 135.9891602 | 0.010148319  | 0.991766529 | 0.995467674 | PCDH7      |
| ENSG00000232385 | 2.096777453 | 2.10970837  | -0.014467856 | 0.991822285 | 0.995467674 | RPS3AP25   |
| ENSG00000213326 | 16.96319346 | 16.90706427 | 0.00560751   | 0.991827729 | 0.995467674 | RPS7P11    |
| ENSG00000272081 | 4.576232441 | 4.495679368 | 0.012557369  | 0.991980384 | 0.995557261 | AC008972.2 |
| ENSG00000177669 | 1.7871679   | 1.823989131 | -0.016946672 | 0.991993625 | 0.995557261 | MBOAT4     |
| ENSG00000260796 | 4.27672335  | 4.299693123 | -0.011470753 | 0.992253723 | 0.995779829 | AC145285.3 |
| ENSG00000182912 | 6.754924689 | 6.776552991 | -0.009904884 | 0.992532896 | 0.996006963 | TSPEAR-AS2 |
| ENSG00000139263 | 304.6659225 | 305.2020716 | -0.003304022 | 0.992556726 | 0.996006963 | LRIG3      |
| ENSG00000110696 | 3164.104712 | 3159.953706 | 0.001803088  | 0.99288667  | 0.996270905 | C11orf58   |
| novel.328       | 11.1182927  | 11.06794538 | 0.006974841  | 0.992896446 | 0.996270905 | -          |
| ENSG00000287216 | 3.326440121 | 3.392940604 | -0.012305402 | 0.99294015  | 0.996276281 | AC106865.2 |
| ENSG00000248923 | 1.83125942  | 1.813376645 | 0.014920778  | 0.993156122 | 0.996394549 | MTND5P11   |
| novel.335       | 6.359639395 | 6.378591517 | 0.009023644  | 0.993163547 | 0.996394549 | -          |
| ENSG00000255449 | 3.857476187 | 3.893559308 | -0.012393691 | 0.993178049 | 0.996394549 | AP002812.5 |
| ENSG00000225578 | 9.510967086 | 9.628736699 | -0.009568671 | 0.993235292 | 0.996394549 | NCBP2-AS1  |
| ENSG00000207525 | 2.653029035 | 2.649180997 | 0.017078986  | 0.993249776 | 0.996394549 | RF00019    |
| ENSG00000277383 | 17.25775923 | 17.10317891 | 0.005867483  | 0.993313266 | 0.996419767 | AC010331.1 |
| ENSG00000248544 | 1.773306493 | 1.803920035 | -0.014521279 | 0.993443543 | 0.996497407 | AC008676.1 |
| ENSG00000129749 | 24.50081084 | 24.52900662 | -0.004412884 | 0.993467374 | 0.996497407 | CHRNA10    |
| novel.622       | 1.789675198 | 1.773238453 | 0.013593277  | 0.993567225 | 0.996538311 | -          |
| ENSG00000286511 | 9.10085147  | 9.099876557 | 0.005749742  | 0.993584866 | 0.996538311 | Z95118.2   |
| ENSG00000279266 | 2.123246619 | 2.129777466 | -0.010957088 | 0.99382244  | 0.996738113 | AC068860.1 |
| ENSG00000250519 | 83.02844374 | 82.89473256 | 0.004897149  | 0.993890861 | 0.996767245 | AP002784.1 |
| ENSG00000249042 | 17.19848138 | 17.06072897 | 0.006148898  | 0.993928217 | 0.996767245 | AC008771.1 |
| ENSG00000276853 | 3.872591243 | 3.832196145 | 0.010900953  | 0.994106932 | 0.99690799  | AC026124.2 |
| ENSG00000198695 | 20504.69321 | 20539.40297 | -0.002434803 | 0.994183574 | 0.996929153 | MT-ND6     |
| ENSG00000104967 | 23.0132233  | 23.18988663 | -0.007130109 | 0.994204779 | 0.996929153 | NOVA2      |
| ENSG00000278493 | 1.7871679   | 1.773238453 | 0.012105667  | 0.994270522 | 0.996956598 | AC039056.2 |
| ENSG00000270951 | 1.803536605 | 1.793307549 | 0.010689368  | 0.994347244 | 0.996995051 | AL121917.2 |
| ENSG00000234664 | 2.446717578 | 2.395427609 | 0.010419227  | 0.994728451 | 0.997321042 | HMG2P5     |
| ENSG00000280384 | 1.466204238 | 1.456837632 | 0.017554093  | 0.994749143 | 0.997321042 | FP325332.1 |
| ENSG00000081721 | 380.5660106 | 380.8709439 | -0.001544361 | 0.994833995 | 0.997338049 | DUSP12     |
| ENSG00000255108 | 1.847628125 | 1.834601616 | 0.012845527  | 0.99484288  | 0.997338049 | AP006621.1 |
| ENSG00000236152 | 2.111892509 | 2.120320855 | -0.010163201 | 0.994950284 | 0.997393947 | MRPS36P1   |
| ENSG00000156384 | 137.9309104 | 137.6123172 | 0.002006843  | 0.994975417 | 0.997393947 | SFR1       |
| ENSG00000229915 | 3.839853833 | 3.801514564 | 0.011403191  | 0.995023469 | 0.997403633 | AC016999.1 |
| ENSG00000279785 | 1.466204238 | 1.467450118 | 0.013575531  | 0.995104138 | 0.997446012 | AC008267.8 |
| ENSG00000156467 | 2963.687625 | 2967.389325 | -0.001806103 | 0.995186632 | 0.997466724 | UQCRB      |
| ENSG00000106086 | 366.0833832 | 365.8333883 | 0.001807261  | 0.995221383 | 0.997466724 | PLEKHA8    |

|                 |             |             |              |             |             |            |
|-----------------|-------------|-------------|--------------|-------------|-------------|------------|
| ENSG00000120129 | 5595.260694 | 5585.916571 | 0.002382046  | 0.995239978 | 0.997466724 | DUSP1      |
| ENSG00000107201 | 808.5639545 | 809.3211277 | -0.001759636 | 0.995338365 | 0.997508377 | DDX58      |
| ENSG00000130312 | 674.2973427 | 673.5074998 | 0.001553762  | 0.995391053 | 0.997508377 | MRPL34     |
| ENSG00000180279 | 3.296210009 | 3.352802412 | -0.007675801 | 0.99539672  | 0.997508377 | LINC01869  |
| ENSG00000260252 | 4.255268779 | 4.259554931 | -0.006778636 | 0.995455176 | 0.997528481 | AC009087.1 |
| ENSG00000041988 | 343.5653105 | 343.2794798 | 0.001399563  | 0.995497931 | 0.997532851 | THAP3      |
| ENSG00000270679 | 1.511549406 | 1.518200796 | 0.011652859  | 0.995597153 | 0.997574039 | AC138473.1 |
| ENSG00000161040 | 9.322277983 | 9.295862802 | 0.0049282    | 0.995615828 | 0.997574039 | FBXL13     |
| novel.353       | 2.739958426 | 2.691759334 | 0.010181409  | 0.995700166 | 0.99762007  | -          |
| ENSG00000119866 | 32.75754048 | 32.70894963 | 0.003875316  | 0.995786667 | 0.997668263 | BCL11A     |
| ENSG00000259818 | 1.759445085 | 1.742556871 | 0.013170066  | 0.995855455 | 0.997673007 | AL606760.3 |
| ENSG00000241741 | 6.378515397 | 6.370419176 | -0.004714509 | 0.995868202 | 0.997673007 | RPL7AP30   |
| ENSG00000067955 | 1212.993381 | 1214.131368 | -0.001536989 | 0.996020791 | 0.997749703 | CBFB       |
| ENSG00000157870 | 36.94622333 | 36.81188582 | 0.004180872  | 0.996021566 | 0.997749703 | PRXL2B     |
| ENSG00000167699 | 1056.992726 | 1055.881807 | 0.001218875  | 0.996119154 | 0.997789606 | GLOD4      |
| ENSG00000119231 | 734.2699265 | 733.8998193 | 0.001202075  | 0.996138209 | 0.997789606 | SENP5      |
| ENSG00000223522 | 12.33276904 | 12.41022903 | -0.00383349  | 0.996391801 | 0.998005142 | AC093690.1 |
| ENSG00000124279 | 128.8616136 | 128.5290892 | 0.001629726  | 0.99653175  | 0.998084096 | FASTKD3    |
| novel.358       | 14.51522223 | 14.42203206 | 0.002855951  | 0.996547459 | 0.998084096 | -          |
| ENSG00000275457 | 20.08966164 | 20.09584629 | -0.00223679  | 0.996698885 | 0.998197276 | AL117332.1 |
| ENSG00000256325 | 4.540987734 | 4.515748464 | -0.004244117 | 0.996948786 | 0.998409066 | AC025423.1 |
| ENSG00000267397 | 7.927888079 | 7.898076582 | 0.002857347  | 0.997068327 | 0.998490295 | AC090229.1 |
| ENSG00000229539 | 7.892643372 | 7.907533193 | -0.003143812 | 0.997119012 | 0.998502566 | AL353194.1 |
| ENSG00000213598 | 4.55610279  | 4.525205075 | -0.00377056  | 0.997210155 | 0.998511096 | AL049873.1 |
| ENSG00000271267 | 3.885199001 | 3.893559308 | -0.003982314 | 0.997228035 | 0.998511096 | AL353807.4 |
| ENSG00000272434 | 2.406387005 | 2.375358513 | 0.006771432  | 0.997242829 | 0.998511096 | AC137630.3 |
| ENSG00000233426 | 237.1472339 | 237.1765425 | -0.000942484 | 0.99738381  | 0.998613583 | EIF3FP3    |
| ENSG00000181374 | 6.77505434  | 6.769536526 | -0.005882837 | 0.997422058 | 0.998613583 | CCL13      |
| novel.274       | 2.460578986 | 2.42610919  | 0.005107052  | 0.997544905 | 0.998698092 | -          |
| ENSG00000164049 | 1.816144364 | 1.834601616 | -0.00484845  | 0.997683018 | 0.998797877 | FBXW12     |
| ENSG00000197128 | 129.3101219 | 129.0708264 | 0.000985022  | 0.997863681 | 0.998909937 | ZNF772     |
| ENSG00000257802 | 1.788421549 | 1.782695063 | 0.005698571  | 0.997871848 | 0.998909937 | AC089984.2 |
| novel.525       | 28.48561826 | 28.41678655 | 0.001905254  | 0.998061389 | 0.999061181 | -          |
| ENSG00000243083 | 1.774560141 | 1.773238453 | 0.004176089  | 0.998113007 | 0.999074358 | LINC00870  |
| ENSG00000259165 | 2.094270155 | 2.089639274 | -0.00386814  | 0.9981545   | 0.999077399 | DDX18P1    |
| ENSG00000236165 | 3.28360225  | 3.311508345 | 0.002608241  | 0.9983529   | 0.999237487 | PRADC1P1   |
| ENSG00000207031 | 5.127469429 | 5.155566571 | 0.002058941  | 0.998487904 | 0.999278189 | SNORD59A   |
| ENSG00000175711 | 53.31735068 | 53.26912924 | -0.000859209 | 0.998507467 | 0.999278189 | B3GNTL1    |
| ENSG00000108946 | 4431.630102 | 4430.170894 | 0.00400661   | 0.998508951 | 0.999278189 | PRKAR1A    |
| ENSG00000133059 | 669.8601825 | 670.2883954 | -0.000507182 | 0.998567688 | 0.999298479 | DSTYK      |
| ENSG00000149262 | 448.4953999 | 448.4337282 | 0.0003447    | 0.998683727 | 0.999376109 | INTS4      |
| ENSG00000278952 | 1.81990531  | 1.823989131 | 0.002644155  | 0.998752726 | 0.999406662 | AP003068.4 |
| ENSG00000138669 | 21.23894789 | 21.16918774 | 0.001832094  | 0.998874292 | 0.999489812 | PRKG2      |
| ENSG00000254635 | 446.630576  | 446.3448253 | 0.000320601  | 0.99894252  | 0.999519588 | WAC-AS1    |
| ENSG00000203801 | 1.803536605 | 1.813376645 | -0.00198124  | 0.999090136 | 0.999598775 | LINC00222  |
| ENSG00000269983 | 1.538018572 | 1.548882377 | 0.002821915  | 0.999128177 | 0.999598775 | AC146944.4 |
| ENSG00000278783 | 2.361041837 | 2.355289417 | -0.002723552 | 0.999137084 | 0.999598775 | MIR6071    |
| ENSG00000249790 | 5.497539206 | 5.443725955 | 0.001186053  | 0.999304829 | 0.9997281   | AC092490.1 |
| ENSG00000197568 | 123.5254679 | 123.5322304 | 0.000222545  | 0.999369614 | 0.999754417 | HHLA3      |
| ENSG00000151229 | 220.9262169 | 221.0357343 | 0.000201524  | 0.99952496  | 0.999779849 | SLC2A13    |
| ENSG00000235297 | 1.846374476 | 1.854670712 | 0.000999998  | 0.999536533 | 0.999779849 | FAUP1      |



|                 |             |             |              |             |             |            |
|-----------------|-------------|-------------|--------------|-------------|-------------|------------|
| ENSG00000278615 | 1.84261353  | 1.844058227 | 0.001444427  | 0.999544785 | 0.999779849 | C11orf98   |
| ENSG00000280092 | 1.759445085 | 1.762625967 | -0.001310662 | 0.999597836 | 0.999779849 | AC002044.3 |
| ENSG00000207547 | 8.135453185 | 8.102363562 | -0.000342733 | 0.999650981 | 0.999779849 | MIR25      |
| ENSG00000184924 | 138.1114643 | 138.1098537 | 0.000144165  | 0.999664089 | 0.999779849 | PTRHD1     |
| ENSG00000258216 | 1.536764924 | 1.548882377 | 0.001115537  | 0.999664406 | 0.999779849 | AC009522.1 |
| ENSG00000259746 | 3.074783496 | 3.048298346 | -0.000625411 | 0.999744855 | 0.999821821 | HSPE1P3    |
| ENSG00000178127 | 18.28458665 | 18.31315122 | -1.87E-05    | 0.99997838  | 0.999983249 | NDUFV2     |
| ENSG00000128928 | 1536.80884  | 1536.768933 | 4.73E-06     | 0.999983249 | 0.999983249 | IVD        |
| novel.901       | 3766.557964 | 0           | 14.21257003  | NA          | 1           | -          |
| ENSG00000112936 | 3815.414888 | 129.0473025 | 4.885632874  | NA          | 1           | C7         |
| ENSG00000151655 | 1571.590576 | 1.773238453 | 9.787743365  | NA          | 1           | ITIH2      |
| novel.939       | 1238.850496 | 0           | 26.42964151  | NA          | 1           | -          |
| novel.1019      | 867.3488976 | 52.28958353 | 4.052237588  | NA          | 1           | -          |
| ENSG00000114115 | 834.2089703 | 79.2224597  | 3.395224113  | NA          | 1           | RBP1       |
| novel.959       | 385.4107232 | 357.0364295 | 0.11035337   | NA          | 1           | -          |
| ENSG00000143850 | 454.3688578 | 124.0313549 | 1.872615608  | NA          | 1           | PLEKHA6    |
| ENSG00000136352 | 289.2940851 | 0           | 24.43653068  | NA          | 1           | NKX2-1     |
| ENSG00000177098 | 769.226776  | 1.854670712 | 8.71647825   | NA          | 1           | SCN4B      |
| novel.946       | 440.9190746 | 8.039587735 | 5.779834678  | NA          | 1           | -          |
| ENSG00000223756 | 198.9294674 | 279.3361283 | -0.489499873 | NA          | 1           | TSSC2      |
| novel.961       | 447.4479855 | 0           | 25.03497555  | NA          | 1           | -          |
| ENSG00000050555 | 350.7791093 | 16.22222768 | 4.437320554  | NA          | 1           | LAMC3      |
| ENSG00000204310 | 58.15082346 | 172.491054  | -1.569095288 | NA          | 1           | AGPAT1     |
| ENSG00000162552 | 298.5615119 | 8.500196642 | 5.132266512  | NA          | 1           | WNT4       |
| ENSG00000211896 | 254.4299767 | 0           | 10.32475904  | NA          | 1           | IGHG1      |
| novel.1042      | 298.8117477 | 0           | 24.48931382  | NA          | 1           | -          |
| novel.930       | 70.68615932 | 0           | 8.47700529   | NA          | 1           | -          |
| ENSG00000124780 | 221.8111219 | 0           | 10.12683059  | NA          | 1           | KCNK17     |
| ENSG00000163687 | 108.2051285 | 1.682349583 | 5.97327809   | NA          | 1           | DNASE1L3   |
| ENSG00000211890 | 44.69273004 | 0           | 7.815546463  | NA          | 1           | IGHA2      |
| ENSG00000136099 | 151.0968167 | 0           | 23.55516102  | NA          | 1           | PCDH8      |
| ENSG00000110786 | 139.3565966 | 1.00940975  | 7.082433937  | NA          | 1           | PTPN5      |
| ENSG00000225383 | 76.64841674 | 5.34094033  | 3.841118969  | NA          | 1           | SFTA1P     |
| ENSG00000196767 | 78.2278353  | 0           | 8.623242452  | NA          | 1           | POU3F4     |
| novel.941       | 101.3197823 | 0           | 8.996386972  | NA          | 1           | -          |
| novel.929       | 97.04431257 | 0           | 22.95895691  | NA          | 1           | -          |
| novel.925       | 21.19847478 | 72.44225036 | -1.773637662 | NA          | 1           | -          |
| ENSG00000135914 | 73.06021953 | 9.999612611 | 2.86521118   | NA          | 1           | HTR2B      |
| novel.841       | 34.89566086 | 37.40836804 | -0.100497226 | NA          | 1           | -          |
| novel.448       | 38.8024841  | 0           | 7.611485268  | NA          | 1           | -          |
| novel.891       | 39.14107012 | 0           | 7.624053223  | NA          | 1           | -          |
| ENSG00000229231 | 31.08352984 | 0           | 21.41676598  | NA          | 1           | FEM1AP1    |
| novel.1023      | 31.14018533 | 0           | 7.294247436  | NA          | 1           | -          |
| novel.883       | 27.27139882 | 0           | 7.103090708  | NA          | 1           | -          |
| novel.953       | 0           | 32.63758192 | -20.95030157 | NA          | 1           | -          |
| novel.962       | 29.17471422 | 0           | 21.13791186  | NA          | 1           | -          |
| ENSG00000217330 | 22.11136236 | 2.231278821 | 3.311350571  | NA          | 1           | SSXP10     |
