# Supplementary material for: Synergistic Effect of Erastin Combined with Nutlin-3 on Vestibular Schwannoma Cells as p53 Modulates Erastin-Induced Ferroptosis Response
Source: PubMed Central journal article supplement (PMC8961447; doi:10.1155/2022/7507857), 2022-03-21
Supplement: 7507857.f3.pdf [file 7507857.f3.pdf]

**Supplementary Table 2.** Top deregulated gene sets from GSEA analysis

|       | GSEA Set Name                                                 | Number of Genes in Set | Gene Count | ES (VS vs. Ctrl) | NES (VS vs. Ctrl) | Nominal P Value | FDR Q Value |
|-------|---------------------------------------------------------------|------------------------|------------|------------------|-------------------|-----------------|-------------|
| No.1  | BIOSYNTHESIS_OF_AMINO_ACIDS(HSA01230)                         | 258                    | 49         | -0.5846092       | -1.5621203        | 0               | 0.050999973 |
| No.2  | THIAMINE_METABOLISM(HSA00730)                                 | 28                     | 9          | -0.72221303      | -1.5126305        | 0               | 0.0697793   |
| No.3  | CYSTEINE_AND_METHIONINE_METABOLISM(HSA00270)                  | 117                    | 26         | -0.5321748       | -1.491069         | 0               | 0.063519545 |
| No.4  | GLYCOLYSIS/_GLUCONEOGENESIS(HSA00010)                         | 215                    | 68         | -0.5107251       | -1.4887606        | 0               | 0.060389634 |
| No.5  | BASE_EXCISION_REPAIR(HSA03410)                                | 99                     | 22         | -0.6410489       | -1.4730167        | 0               | 0.067292206 |
| No.6  | OOCYTE_MEIOSIS(HSA04114)                                      | 266                    | 75         | -0.62000644      | -1.4513403        | 0               | 0.08394495  |
| No.7  | CENTRAL_CARBON_METABOLISM_IN_CANCER(HSA05230)                 | 144                    | 36         | -0.52707756      | -1.4492519        | 0               | 0.076623864 |
| No.8  | 2-OXOCARBOXYLIC_ACID_METABOLISM(HSA01210)                     | 37                     | 14         | -0.63670623      | -1.4374844        | 0               | 0.10112876  |
| No.9  | GALACTOSE_METABOLISM(HSA00052)                                | 50                     | 16         | -0.65431637      | -1.4310215        | 0               | 0.0999859   |
| No.10 | CELL_CYCLE(HSA04110)                                          | 275                    | 91         | -0.6482852       | -1.4166309        | 0               | 0.11969377  |
| No.11 | GLUTATHIONE_METABOLISM(HSA00480)                              | 118                    | 36         | -0.61331385      | -1.4088451        | 0               | 0.117778234 |
| No.12 | GLUCAGON_SIGNALING_PATHWAY(HSA04922)                          | 187                    | 38         | -0.4297487       | -1.4000245        | 0               | 0.12035187  |
| No.13 | ONE_CARBON_POOL_BY_FOLATE(HSA00670)                           | 49                     | 14         | -0.6032422       | -1.3995095        | 0               | 0.11572843  |
| No.14 | P53_SIGNALING_PATHWAY(HSA04115)                               | 163                    | 36         | -0.5109601       | -1.385536         | 0               | 0.12957214  |
| No.15 | UBIQUINONE_AND_OTHER_TERPENOID-QUINONE_BIOSYNTHESIS(HSA00130) | 20                     | 8          | -0.67280245      | -1.3805438        | 0               | 0.13386089  |
| No.16 | CELLULAR_SENESCENCE(HSA04218)                                 | 316                    | 85         | -0.47804257      | -1.3728352        | 0               | 0.13377704  |
| No.17 | NON-HOMOLOGOUS_END-JOINING(HSA03450)                          | 25                     | 9          | -0.75347996      | -1.3700392        | 0               | 0.13370176  |

|           |                                                       |     |    |                 |                |   |                |
|-----------|-------------------------------------------------------|-----|----|-----------------|----------------|---|----------------|
| No.1<br>8 | AMINO_SUGAR_AND_NUCLEOTIDE_SUGAR_METABOLISM(HSA00520) | 70  | 32 | -0.59526<br>32  | -1.3674<br>239 | 0 | 0.1337<br>2059 |
| No.1<br>9 | ARGININE_AND_PROLINE_METABOLISM(HSA00330)             | 114 |    | -0.39263<br>725 | -1.2872<br>913 | 0 | 0.1745<br>1757 |
| No.2<br>0 | NUCLEOTIDE_EXCISION_REPAIR(HSA03420)                  | 86  |    | -0.66549<br>66  | -1.2869<br>13  | 0 | 0.1718<br>3232 |
